# Supplementary material for: Noncanonical usage of stop codons in ciliates expands proteins with Q-rich motifs
Source: bioRxiv preprint, doi:10.1101/2020.12.08.407247, version 3 (2023-11-13)
Supplement: Dataset DS4 [file 407247_file18.xlsx]

## Sheet: DS4
Species	Protein number	SCD Protein #	SCD Protein (%)	SCD Number	PolyQ Protein #	PolyQ Protein (%)	PolyQ Number	PolyQ/N Protein #	PolyQ/N Protein (%)	PolyQ/N Number	PolyN Protein #	PolyN Protein (%)	PolyN Number	PolyY Protein #	PolyY Protein (%)	PolyY Number	PolyW Protein #	PolyW Protein (%)	PolyW Number	PolyC Protein #	PolyC Protein (%)	PolyC Number	PolyP Protein #	PolyP Protein (%)	PolyP Number	PolyA Protein #	PolyA Protein (%)	PolyA Number	PolyS Protein #	PolyS Protein (%)	PolyS Number	PolyT Protein #	PolyT Protein (%)	PolyT Number	PolyD Protein #	PolyD Protein (%)	PolyD Number	PolyE Protein #	PolyE Protein (%)	PolyE Number	PolyG Protein #	PolyG Protein (%)	PolyG Number	PolyF Protein #	PolyF Protein (%)	PolyF Number	PolyH Protein #	PolyH Protein (%)	PolyH Number
S. cerevisiae S288c	6062	1016	16.7601	1978	396	6.5325	660	1710	28.2085	3192	653	10.772	1002	61	1.00627	65	1	0.0164962	1	18	0.296932	18	282	4.65193	387	612	10.0957	715	1596	26.3279	3002	512	8.44606	832	700	11.5473	926	878	14.4837	1229	379	6.25206	440	150	2.47443	155	70	1.15473	80
Candida albicans	6035	1117	18.5087	2703	1024	16.9677	1882	2481	41.1102	6021	1154	19.1218	1922	114	1.88898	117	6	0.09942	6	8	0.13256	8	579	9.59403	890	624	10.3397	791	1947	32.2618	3759	1155	19.1384	2105	1010	16.7357	1442	1228	20.348	1860	769	12.7423	1008	126	2.08782	135	180	2.9826	209
Candida auris	5409	924	17.0826	2098	327	6.04548	548	1089	20.1331	1748	197	3.64208	217	62	1.14624	63	2	0.0369754	2	5	0.0924385	5	380	7.02533	551	807	14.9196	1033	1593	29.4509	2791	294	5.43539	655	670	12.3868	895	927	17.1381	1233	480	8.8741	634	85	1.57145	87	72	1.33111	85
Candida tropicalis	6226	979	15.7244	2333	864	13.8773	1740	2222	35.689	4861	864	13.8773	1247	103	1.65435	105	4	0.0642467	5	11	0.176678	11	545	8.75361	850	571	9.17122	720	1919	30.8224	3591	876	14.07	1730	1050	16.8648	1515	1236	19.8522	1906	556	8.93029	716	200	3.21234	223	198	3.18021	242
Neurospora crassa	10257	1897	18.4947	4519	1384	13.4932	2301	2552	24.8806	4517	611	5.95691	712	47	0.458224	47	12	0.116993	13	17	0.16574	18	2312	22.5407	4007	3335	32.5144	5104	3492	34.045	6048	1859	18.1242	2533	1647	16.0573	2353	2151	20.971	3402	2679	26.1187	4543	133	1.29668	137	360	3.5098	428
Magnaporthe oryzae	12794	1780	13.9128	3781	973	7.60513	1449	2040	15.945	3133	285	2.22761	325	51	0.398624	51	8	0.0625293	8	15	0.117242	16	2073	16.2029	3324	4149	32.4293	6194	2953	23.0811	4568	1183	9.24652	1504	1495	11.6852	2043	1348	10.5362	1795	2664	20.8223	3774	135	1.05518	138	221	1.72737	262
Trichoderma reesei	13735	2063	15.02	4320	1005	7.31707	1506	2166	15.7699	3228	391	2.84674	443	90	0.65526	92	7	0.0509647	7	35	0.254823	37	2256	16.4252	3543	4189	30.4987	6095	3686	26.8365	5690	1220	8.88242	1643	1726	12.5664	2345	1925	14.0153	2687	2194	15.9738	2948	196	1.42701	200	333	2.42446	395
Cryptococcus neoformans	6743	1247	18.4933	2955	415	6.15453	718	1032	15.3048	1610	129	1.9131	138	29	0.430076	29	10	0.148302	10	7	0.103811	7	1707	25.3151	2734	1760	26.1011	2459	2514	37.2831	4925	600	8.89812	706	759	11.2561	958	1686	25.0037	2634	1644	24.3808	2411	89	1.31989	96	159	2.358	188
Ustilago maydis	6806	1648	24.2139	3719	687	10.094	1117	1382	20.3056	2195	144	2.11578	178	17	0.24978	17	5	0.0734646	5	17	0.24978	17	1110	16.3091	1635	3035	44.593	5737	3172	46.6059	7032	735	10.7993	842	1264	18.5718	1903	931	13.6791	1246	1393	20.4672	2006	73	1.07258	74	180	2.64473	221
Taiwanofungus camphoratus	14019	2084	14.8655	4325	473	3.37399	681	1332	9.50139	1826	130	0.927313	148	53	0.378058	53	11	0.0784649	11	19	0.13553	19	2867	20.4508	4878	3097	22.0914	4080	4196	29.9308	7586	937	6.68379	1053	1444	10.3003	1799	1987	14.1736	2645	1953	13.9311	2606	172	1.22691	174	229	1.6335	284
Dictyostelium discoideum	12734	2256	17.7163	6090	3123	24.5249	8184	7956	62.4784	38423	6328	49.6937	23324	285	2.2381	301	0	0	0	32	0.251296	36	1364	10.7115	2169	553	4.3427	694	4923	38.6603	12571	3467	27.2263	7169	2100	16.4913	3333	2242	17.6064	4114	1995	15.6667	2892	591	4.64112	697	512	4.02073	721
Plasmodium falciparum	5376	430	7.99851	996	113	2.10193	135	3422	63.6533	21946	2905	54.0365	16065	532	9.89583	673	1	0.0186012	1	16	0.297619	18	103	1.91592	167	201	3.73884	260	1069	19.8847	1694	308	5.72917	374	962	17.8943	1801	1294	24.0699	2376	261	4.85491	335	522	9.70982	654	98	1.82292	148
Tetrahymena thermophila	26972	13697	50.7823	82029	8891	32.9638	20392	19575	72.5753	117533	6800	25.2113	13573	771	2.85852	816	1	0.00370755	1	101	0.374462	108	419	1.55346	577	699	2.59158	785	6040	22.3936	9455	933	3.45914	1112	1759	6.52158	2242	4117	15.264	6236	1062	3.93742	1407	1333	4.94216	1484	196	0.72668	250
Paramecium tetraurelia	39461	16214	41.0887	51971	10694	27.1002	18630	24835	62.9356	71799	3426	8.68199	4009	757	1.91835	816	6	0.0152049	8	90	0.228073	92	723	1.83219	971	771	1.95383	860	4064	10.2988	4849	1119	2.83571	1356	1614	4.09011	1799	4191	10.6206	5316	1046	2.65072	1222	959	2.43025	1021	142	0.359849	171
Oxytricha trifallax	23559	13674	58.0415	79098	8646	36.6994	18991	17037	72.3163	85324	5188	22.0213	7767	404	1.71484	438	1	0.00424466	1	85	0.360796	89	454	1.92708	653	810	3.43818	875	5480	23.2607	8031	1281	5.43741	1957	2545	10.8027	3339	3888	16.5032	5205	2040	8.65911	2683	592	2.51284	630	252	1.06965	310
Stylonychia lemnae	20720	10185	49.1554	45503	5831	28.1419	11129	13528	65.2896	51790	3605	17.3986	5156	332	1.60232	354	1	0.00482625	1	66	0.318533	67	350	1.68919	443	658	3.17568	703	3970	19.1602	5302	784	3.78378	1072	1992	9.6139	2423	3321	16.028	4601	1393	6.72297	1792	527	2.54344	562	202	0.974903	257
Pseudocohnilembus persalinus	13175	6279	47.6584	30245	6218	47.1954	18133	10479	79.537	72160	4777	36.2581	11574	284	2.1556	301	2	0.0151803	3	36	0.273245	48	134	1.01708	147	204	1.54839	218	1717	13.0323	2316	206	1.56357	237	1073	8.14421	1369	2910	22.0873	4716	556	4.22011	694	399	3.02846	434	41	0.311195	52
Stentor coeruleus	30969	4307	13.9075	7618	179	0.577997	180	5780	18.6638	7289	1156	3.73277	1229	408	1.31745	499	1	0.00322904	1	120	0.387484	123	780	2.51865	1085	722	2.33136	776	5345	17.2592	7010	759	2.45084	977	1038	3.35174	1210	3551	11.4663	4738	967	3.12248	1130	505	1.63066	528	70	0.226032	84
Drosophila melanogaster	22084	5375	24.3389	16229	4824	21.8439	15351	8377	37.9324	27228	2513	11.3793	3914	260	1.17732	266	16	0.0724506	16	161	0.729035	165	4436	20.0869	9544	6404	28.9984	13650	7688	34.8125	19926	3560	16.1203	7305	3090	13.992	4498	4076	18.4568	7110	5608	25.394	12576	279	1.26336	285	1601	7.24959	2476
Aedes aegypti	18998	4215	22.1865	12927	3311	17.4282	9208	6999	36.8407	20661	2268	11.9381	3694	192	1.01063	208	12	0.0631645	12	125	0.657964	126	3425	18.0282	7168	4160	21.897	6663	6729	35.4195	18454	3105	16.3438	5790	2838	14.9384	4009	3392	17.8545	5655	4135	21.7654	8085	273	1.43699	290	1430	7.52711	2065
Caenorhabditis elegans	26548	3597	13.549	8639	1567	5.90252	3671	5314	20.0166	10173	893	3.36372	1081	202	0.760886	219	16	0.0602682	16	150	0.565014	195	3007	11.3267	5058	3075	11.5828	4332	6244	23.5197	11123	2566	9.66551	4320	2334	8.79162	2967	3623	13.647	5501	2472	9.31144	4050	731	2.7535	801	420	1.58204	520
Danio rerio	46841	10361	22.1195	29300	2974	6.34914	4494	9454	20.1832	14168	1215	2.59388	1289	340	0.72586	365	17	0.036293	18	473	1.0098	568	6345	13.5458	11283	5744	12.2628	7200	13962	29.8072	26644	3388	7.23298	4861	3600	7.68557	4534	9340	19.9398	14821	5028	10.7342	7263	838	1.78903	885	1026	2.19039	1434
Mus musculus	55315	9602	17.3588	24641	2922	5.28247	4280	8080	14.6072	11675	613	1.1082	659	243	0.439302	250	29	0.052427	31	346	0.625508	374	7941	14.356	14686	7662	13.8516	10390	11733	21.2112	20330	2419	4.37314	3267	2708	4.8956	3158	8422	15.2255	13450	5901	10.668	8537	883	1.59631	959	628	1.13532	747
Homo sapiens	79052	10996	13.9098	27553	3205	4.05429	4634	9370	11.853	13595	778	0.984162	826	327	0.413652	335	41	0.0518646	41	408	0.516116	425	10546	13.3406	18602	10147	12.8359	13606	13785	17.4379	27046	2878	3.64064	4081	3280	4.14917	3862	10746	13.5936	16824	8092	10.2363	11427	929	1.17518	986	627	0.793149	725
Arabidopsis thaliana	39328	4256	10.8218	8123	1480	3.76322	2121	6348	16.1412	9027	1530	3.89036	1764	229	0.582282	233	13	0.0330553	15	156	0.396664	161	3665	9.31906	6801	5215	13.2603	6195	12716	32.3332	19229	2063	5.24563	2261	3339	8.49013	3978	6376	16.2124	8449	5284	13.4357	7440	1066	2.71054	1101	666	1.69345	744
Chlamydomonas reinhardtii	18829	2415	12.826	5333	5868	31.1647	16651	6575	34.9195	18519	312	1.65702	352	121	0.642626	129	50	0.265548	50	106	0.562961	112	7398	39.2905	24447	14127	75.0279	121606	6900	36.6456	16642	2271	12.0612	3084	2567	13.6332	3835	3978	21.127	7340	10860	57.677	60286	111	0.589516	115	1425	7.56811	2079
Aristerostoma spp.	27868	5030	18.0494	11206	2174	7.80106	3550	8181	29.3563	15690	1639	5.8813	2316	243	0.871968	251	1	0.00358835	1	70	0.251184	82	297	1.06574	320	717	2.57284	764	3058	10.9732	3878	836	2.99986	935	1856	6.65997	2290	3412	12.2434	4721	1584	5.68394	2189	541	1.94129	571	183	0.656667	254
Favella ehrenbergii	26477	7576	28.6135	20702	3759	14.1972	5860	8232	31.0911	15081	494	1.86577	532	105	0.396571	106	2	0.00755373	2	157	0.592967	165	806	3.04415	989	4088	15.4398	5307	3323	12.5505	4092	833	3.14613	938	1629	6.15251	1931	2954	11.1569	3749	2138	8.07493	2863	364	1.37478	370	238	0.898893	285
Pseudokeronopsis spp.	62574	14515	23.1965	35531	5225	8.35011	6624	19423	31.04	32253	1594	2.54738	1682	557	0.890146	633	5	0.00799054	5	150	0.239716	154	992	1.58532	1286	1621	2.59053	1784	6249	9.98658	7670	1095	1.74993	1443	2084	3.33046	2321	9948	15.898	13369	2353	3.76035	2810	1055	1.686	1086	192	0.306837	234
Strombidium inclinatum	32210	9818	30.4812	31803	4073	12.6451	6715	10217	31.72	20443	718	2.22912	767	223	0.692332	233	6	0.0186278	6	88	0.273207	91	1493	4.63521	1842	2211	6.86433	2782	5827	18.0907	8174	939	2.91524	1057	2002	6.21546	2350	5486	17.032	7642	2136	6.63148	2718	642	1.99317	677	192	0.596088	224
Uronema spp.	13887	2690	19.3706	5320	2866	20.638	4390	7583	54.605	15965	1800	12.9618	2381	158	1.13775	161	2	0.014402	2	35	0.252034	37	97	0.698495	107	202	1.4546	215	637	4.58702	749	178	1.28177	186	627	4.51501	752	1366	9.83654	1669	431	3.10362	511	270	1.94426	283	51	0.36725	60
Climacostomum virens	33899	4512	13.3101	8375	516	1.52217	545	2505	7.3896	2783	140	0.412992	142	216	0.637187	219	5	0.0147497	5	98	0.289094	104	1254	3.69922	1558	2417	7.13	2757	5197	15.3308	6831	1133	3.34228	1499	976	2.87914	1156	3269	9.64335	4404	1070	3.15644	1192	495	1.46022	511	48	0.141597	61
Litonotus pictus	30222	3291	10.8894	5680	465	1.53861	502	10280	34.015	19239	5855	19.3733	9010	328	1.0853	335	0	0	0	53	0.175369	54	150	0.496327	166	269	0.89008	289	4712	15.5913	5782	880	2.91179	995	816	2.70002	892	4343	14.3703	5583	754	2.49487	879	598	1.97869	618	69	0.228311	80
Protocruzia adherens	40577	4137	10.1954	7021	794	1.95677	908	4892	12.0561	5961	756	1.86312	798	135	0.332701	137	1	0.00246445	1	84	0.207014	90	213	0.524928	217	1463	3.60549	1662	5736	14.1361	7308	2474	6.09705	3062	2594	6.39278	3131	4446	10.9569	5714	2624	6.46672	3477	589	1.45156	608	397	0.978387	459
Mesodinium pulex	61058	4264	6.98352	7238	1813	2.96931	2162	8285	13.5691	14358	3375	5.52753	5087	636	1.04163	678	12	0.0196534	12	169	0.276786	181	4974	8.14635	5945	16763	27.4542	26695	6347	10.395	7533	1795	2.93983	2300	2953	4.83639	3328	6513	10.6669	8036	7674	12.5684	9735	424	0.694422	440	266	0.435651	344
Blepharisma japonicum	22714	2184	9.61522	3688	303	1.33398	334	2983	13.1329	3606	367	1.61574	374	154	0.677996	158	6	0.0264154	6	47	0.206921	47	636	2.80004	753	656	2.88809	749	2443	10.7555	2958	331	1.45725	373	356	1.56732	378	2673	11.7681	3450	658	2.89689	750	206	0.90693	211	47	0.206921	55
Euplotes focardii	36659	2227	6.07491	3334	304	0.829264	360	4749	12.9545	5657	1000	2.72784	1045	193	0.526474	194	4	0.0109114	4	124	0.338253	126	555	1.51395	720	1477	4.02902	1843	3105	8.46995	3521	673	1.83584	754	1274	3.47527	1377	4185	11.416	4869	1486	4.05357	1824	530	1.44576	559	61	0.166398	67
[truncated: 18 more columns]
