# Supplementary material for: Noncanonical usage of stop codons in ciliates expands proteins with Q-rich motifs
Source: bioRxiv preprint, doi:10.1101/2020.12.08.407247, version 3 (2023-11-13)
Supplement: Dataset DS5 [file 407247_file19.xlsx]

## Sheet: polyQ
species	total protein #	total amino acid #	total Q residue #	total polyQ residue #	total Q residue # (4Q(4/4))	total Q residue % (4Q(4/4))	total Q residue # (5Q(4/5-5/5))	total Q residue % (5Q(4/5-5/5))	total Q residue # (6Q(4/6-6/6))	total Q residue % (6Q(4/6-6/6))	total Q residue # (7Q(4/7-7/7))	total Q residue % (7Q(4/7-7/7))	total Q residue # (8-10Q(≥50))	total Q residue % (8-10Q(≥50))	total Q residue # (11-20Q(≥50))	total Q residue % (11-20Q(≥50))	total Q residue # (≥21Q(≥50))	total Q residue % (≥21Q(≥50))
Saccharomyces cerevisiae S288c	6062	2937762	116027	4550	304	0.00262008	614	0.00529187	622	0.00536082	358	0.00308549	791	0.00681738	1226	0.0105665	635	0.00547286
Candida albicans	6035	2982020	133985	12588	804	0.00600067	1559	0.0116356	1634	0.0121954	1484	0.0110759	2563	0.019129	3631	0.0271	913	0.0068142
Candida auris	5409	2694904	105957	3417	204	0.00192531	465	0.00438857	516	0.0048699	392	0.00369961	656	0.00619119	821	0.00774843	363	0.00342592
Candida tropicalis	6226	3018650	128954	11428	856	0.00663803	1520	0.0117871	1382	0.010717	1242	0.00963134	2729	0.0211626	2871	0.0222638	828	0.00642089
Neurospora crassa	10257	5301782	226885	15972	816	0.00359654	2023	0.00891641	1915	0.0084404	1631	0.00718866	3114	0.013725	3819	0.0168323	2654	0.0116976
Magnaporthe oryzae	12794	5651884	229633	8476	756	0.00329221	1517	0.00660619	1429	0.00622297	1067	0.00464654	1660	0.00722893	1653	0.00719844	394	0.00171578
Trichoderma reesei	13735	6284515	259261	9696	636	0.00245313	1315	0.00507211	1222	0.0047134	1148	0.00442797	1955	0.00754066	2478	0.00955794	942	0.0036334
Cryptococcus neoformans	6743	3634003	140437	4179	292	0.00207922	589	0.00419405	582	0.00414421	616	0.00438631	881	0.00627328	673	0.00479218	546	0.00388786
Ustilago maydis	6806	4006347	177868	7517	588	0.00330582	1028	0.00577957	954	0.00536353	763	0.0042897	1180	0.00663413	1663	0.00934963	1341	0.0075393
Taiwanofungus camphoratus	14019	6335872	239012	3660	364	0.00152294	581	0.00243084	667	0.00279065	618	0.00258564	580	0.00242666	712	0.00297893	138	0.000577377
Dictyostelium discoideum	12734	6851769	347473	81686	3400	0.00978493	5406	0.015558	5342	0.0153739	4955	0.0142601	10586	0.0304657	20049	0.0576994	31948	0.0919438
Chlamydomonas reinhardtii	18829	14027420	651776	111818	7156	0.0109792	13397	0.0205546	13844	0.0212404	12281	0.0188424	24946	0.0382739	28891	0.0443266	11303	0.0173418
Drosophila melanogaster	22084	15045077	817620	106747	8456	0.0103422	13189	0.016131	12878	0.0157506	9746	0.01192	21213	0.0259448	28968	0.0354297	12297	0.01504
Aedes aegypti	18998	13375017	648868	58353	4932	0.00760093	9404	0.0144929	7807	0.0120317	5892	0.00908043	12677	0.0195371	13564	0.0209041	4077	0.00628325
Plasmodium falciparum	5376	4101305	113218	946	44	0.000388631	115	0.00101574	121	0.00106873	101	0.000892084	148	0.00130721	160	0.0014132	257	0.00226996
Caenorhabditis elegans	26548	12173600	516757	20714	1776	0.00343682	3889	0.00752578	3726	0.00721035	2014	0.00389738	4106	0.00794571	4651	0.00900036	552	0.0010682
Danio rerio	46841	24551145	1172038	23738	2564	0.00218764	5306	0.00452716	4818	0.00411079	3267	0.00278745	3279	0.00279769	2760	0.00235487	1744	0.00148801
Mus musculus	55315	23289905	1119505	25079	1628	0.00145421	4318	0.00385706	4793	0.00428136	3131	0.00279677	4004	0.00357658	3719	0.003322	3486	0.00311388
Homo sapiens	79052	28000392	1343401	25652	2184	0.00162572	5592	0.00416257	4938	0.00367575	2753	0.00204928	4320	0.00321572	3265	0.0024304	2600	0.00193539
Arabidopsis thaliana	39328	16643018	588557	11416	1288	0.0021884	2353	0.00399791	2137	0.00363091	1635	0.00277798	1954	0.00331998	1698	0.00288502	351	0.000596374
Tetrahymena thermophila	26972	16911541	1626931	102421	8324	0.00511638	23046	0.0141653	23682	0.0145562	14885	0.00914913	18932	0.0116366	11378	0.00699354	2174	0.00133626
Paramecium tetraurelia	39461	18009409	1640952	99584	8816	0.00537249	21886	0.0133374	20700	0.0126146	12807	0.00780462	15053	0.00917333	10943	0.00666869	9379	0.00571558
Oxytricha trifallax	23559	15273496	1368981	92346	9972	0.00728425	21954	0.0160367	21749	0.015887	14449	0.0105546	16080	0.011746	7398	0.00540402	744	0.00054347
Stylonychia lemnae	20720	11909904	995977	54650	5192	0.00521297	12973	0.0130254	12496	0.0125465	8415	0.00844899	9811	0.00985063	5062	0.00508245	701	0.000703832
Pseudocohnilembus persalinus	13175	7254786	790210	96853	8120	0.0102757	16347	0.0206869	18061	0.0228559	14332	0.018137	20588	0.0260538	16406	0.0207616	2999	0.00379519
Stentor coeruleus	30969	13122840	481241	748	92	0.000191172	285	0.000592219	219	0.000455073	103	0.00021403	21	4.36372e-05	28	5.81829e-05	0	0
Aristerostoma	27868	8111519	456432	18619	2172	0.00475865	4173	0.00914265	3719	0.00814798	2346	0.00513987	3399	0.00744689	2455	0.00537868	355	0.000777772
Favella ehrenbergii	26477	8455052	606667	29568	3288	0.00541978	6710	0.0110604	6255	0.0103104	4375	0.00721153	5282	0.00870659	3217	0.00530274	441	0.000726923
Pseudokeronopsis	62574	16439529	1158958	30182	3164	0.00273004	7842	0.00676642	8312	0.00717196	4604	0.00397253	4354	0.00375682	1708	0.00147374	198	0.000170843
Strombidium inclinatum	32210	12239718	862911	33094	4248	0.00492287	8050	0.00932889	7587	0.00879233	4490	0.00520332	5042	0.00584301	2918	0.00338158	759	0.000879581
Uronema	13887	3059334	258553	23884	2080	0.00804477	4514	0.0174587	4595	0.017772	3070	0.0118738	5212	0.0201583	3816	0.0147591	597	0.002309
Climacostomum virens	33899	11666294	465227	2360	204	0.000438496	667	0.00143371	701	0.00150679	457	0.000982316	263	0.000565315	36	7.73816e-05	32	6.87836e-05
Litonotus pictus	30222	8271898	301155	2243	168	0.000557852	467	0.0015507	611	0.00202886	554	0.00183958	290	0.000962959	153	0.000508044	0	0
Protocruzia adherens	40577	10147279	421306	4413	428	0.00101589	1003	0.00238069	1080	0.00256346	784	0.00186088	629	0.00149298	444	0.00105387	45	0.000106811
Mesodinium pulex	61058	16852070	690335	11103	696	0.00100821	2022	0.00292901	1999	0.0028957	1974	0.00285948	2186	0.00316658	2041	0.00295654	185	0.000267986
Blepharisma japonicum	22714	5818060	238214	1481	136	0.000570915	415	0.00174213	362	0.00151964	283	0.00118801	185	0.000776613	89	0.000373614	11	4.6177e-05
Euplotes focardii	36659	7858305	288093	1743	160	0.000555376	450	0.001562	415	0.00144051	227	0.00078794	235	0.000815709	175	0.000607443	81	0.000281159

## Sheet: polyS
species	total protein #	total amino acid #	total S residue #	total polyS residue #	total S residue # (4S(4/4))	total S residue % (4S(4/4))	total S residue # (5S(4/5-5/5))	total S residue % (5S(4/5-5/5))	total S residue # (6S(4/6-6/6))	total S residue % (6S(4/6-6/6))	total S residue # (7S(4/7-7/7))	total S residue % (7S(4/7-7/7))	total S residue # (8-10S(≥50%))	total S residue % (8-10S(≥50%))	total S residue # (11-20S(≥50%))	total S residue % (11-20S(≥50%))	total S residue # (≥21S(≥50%))	total S residue % (≥21S(≥50%))
Saccharomyces cerevisiae S288c	6062	2937762	264092	14894	1528	0.00578586	3552	0.0134499	3168	0.0119958	2241	0.00848568	2403	0.0090991	1424	0.00539206	578	0.00218863
Candida albicans	6035	2982020	267692	19055	2200	0.0082184	3850	0.0143822	3717	0.0138854	2787	0.0104112	3630	0.0135604	2477	0.00925317	394	0.00147184
Candida auris	5409	2694904	247315	13795	1328	0.00536967	3231	0.0130643	3018	0.0122031	2081	0.00841437	2131	0.00861654	1264	0.00511089	742	0.00300022
Candida tropicalis	6226	3018650	273487	18089	1928	0.0070497	3988	0.014582	3876	0.0141725	2562	0.0093679	3274	0.0119713	1619	0.00591984	842	0.00307876
Neurospora crassa	10257	5301782	443287	30489	3080	0.00694809	6227	0.0140473	6290	0.0141895	4534	0.0102281	6190	0.0139639	3497	0.00788879	671	0.00151369
Magnaporthe oryzae	12794	5651884	460280	21611	2372	0.00515338	5546	0.0120492	5023	0.0109129	3401	0.00738898	3350	0.00727818	1588	0.00345007	331	0.000719127
Trichoderma reesei	13735	6284515	524262	28713	2872	0.00547818	6122	0.0116774	6244	0.0119101	4180	0.00797311	5140	0.00980426	3626	0.00691639	529	0.00100904
Cryptococcus neoformans	6743	3634003	330057	23504	2348	0.00711392	5286	0.0160154	5562	0.0168516	3917	0.0118676	4250	0.0128766	1821	0.00551723	320	0.00096953
Ustilago maydis	6806	4006347	404655	34183	3328	0.00822429	7821	0.0193276	7559	0.0186801	5649	0.01396	6174	0.0152574	3115	0.00769792	537	0.00132706
Taiwanofungus camphoratus	14019	6335872	576630	35796	3216	0.00557723	8508	0.0147547	8693	0.0150755	5905	0.0102405	6408	0.0111128	2674	0.00463729	392	0.000679812
Dictyostelium discoideum	12734	6851769	664670	75847	5080	0.00764289	11515	0.0173244	11914	0.0179247	9361	0.0140837	15650	0.0235455	14943	0.0224818	7384	0.0111093
Chlamydomonas reinhardtii	18829	14027420	1090280	91200	8928	0.00818872	16143	0.0148063	15815	0.0145054	12757	0.0117007	17569	0.0161142	15335	0.0140652	4653	0.00426771
Drosophila melanogaster	22084	15045077	1298635	100387	9804	0.00754947	21219	0.0163395	20784	0.0160045	14885	0.011462	19712	0.015179	11979	0.0092243	2004	0.00154316
Aedes aegypti	18998	13375017	1181383	93278	9872	0.00835631	20677	0.0175024	18989	0.0160735	12844	0.010872	18903	0.0160007	9186	0.00777563	2807	0.00237603
Plasmodium falciparum	5376	4101305	261607	8378	1104	0.00422007	2171	0.00829871	1764	0.00674294	1074	0.00410539	1172	0.00448	655	0.00250376	438	0.00167427
Caenorhabditis elegans	26548	12173600	1002183	52484	5904	0.00589114	13831	0.0138009	12459	0.0124319	7824	0.00780696	8303	0.00828491	3525	0.00351732	638	0.00063661
Danio rerio	46841	24551145	2171999	128291	11612	0.00534623	30034	0.0138278	31032	0.0142873	21855	0.0100622	20749	0.00955295	10559	0.00486142	2450	0.00112799
Mus musculus	55315	23289905	1991194	97391	9700	0.00487145	24313	0.0122103	23047	0.0115745	14929	0.00749751	14784	0.00742469	7464	0.0037485	3154	0.00158397
Homo sapiens	79052	28000392	2345823	127694	11356	0.00484094	27489	0.0117183	39256	0.0167344	18968	0.00808586	17793	0.00758497	8807	0.00375433	4025	0.00171582
Arabidopsis thaliana	39328	16643018	1529291	92128	11752	0.00768461	23790	0.0155562	21080	0.0137842	13351	0.00873019	14740	0.00963845	6852	0.00448051	563	0.000368144
Tetrahymena thermophila	26972	16911541	1406286	43310	4600	0.00327103	12077	0.00858787	11571	0.00822806	6473	0.0046029	5474	0.00389252	2433	0.00173009	682	0.000484965
Paramecium tetraurelia	39461	18009409	1243711	22161	1992	0.00160166	6092	0.00489824	6357	0.00511132	3516	0.00282702	2344	0.00188468	1181	0.000949578	679	0.000545947
Oxytricha trifallax	23559	15273496	1257537	36123	4060	0.00322853	9934	0.00789957	9856	0.00783754	5731	0.00455732	4496	0.00357524	1807	0.00143694	239	0.000190054
Stylonychia lemnae	20720	11909904	943655	23732	2596	0.00275101	6580	0.00697289	6610	0.00700468	3835	0.00406399	2976	0.00315369	905	0.000959037	230	0.000243733
Pseudocohnilembus persalinus	13175	7254786	482107	10980	1100	0.00228165	2635	0.00546559	2515	0.00521668	1841	0.00381865	1535	0.00318394	933	0.00193526	421	0.00087325
Stentor coeruleus	30969	13122840	1090170	31560	2764	0.00253538	8986	0.00824275	8805	0.00807672	5099	0.00467725	4235	0.00388472	1583	0.00145207	88	8.07214e-05

## Sheet: polyT
species	total protein #	total T residue #	total polyT residue #	total T residue # (4T(4/4))	total T residue % (4T(4/4))	total T residue # (5T(4/5-5/5))	total T residue % (5T(4/5-5/5))	total T residue # (6T(4/6-6/6))	total T residue % (6T(4/6-6/6))	total T residue # (7T(4/7-7/7))	total T residue % (7T(4/7-7/7))	total T residue # (8-10T(≥50))	total T residue % (8-10T(≥50))	total T residue # (11-20T(≥50))	total T residue % (11-20T(≥50))	total T residue # (≥21T(≥50))	total T residue % (≥21T(≥50))
Saccharomyces cerevisiae S288c	6062	173748	3790	336	0.00193384	917	0.00527776	1146	0.00659576	598	0.00344177	503	0.002895	219	0.00126045	71	0.000408638
Candida albicans	6035	183282	11039	920	0.00501959	2634	0.0143713	2336	0.0127454	1461	0.00797132	1969	0.010743	1646	0.0089807	73	0.000398293
Candida auris	5409	146750	3099	564	0.00384327	692	0.0047155	568	0.00387053	419	0.0028552	533	0.00363203	261	0.00177853	62	0.000422487
Candida tropicalis	6226	180888	8553	636	0.00351599	2306	0.0127482	1909	0.0105535	1376	0.00760692	1345	0.00743554	841	0.00464929	140	0.00077396
Neurospora crassa	10257	325446	12837	1320	0.00405597	2811	0.00863738	2582	0.00793373	1981	0.00608703	2422	0.00744209	1560	0.00479342	161	0.000494706
Magnaporthe oryzae	12794	332656	7086	812	0.00244096	1714	0.00515247	1700	0.00511038	1086	0.00326463	1072	0.00322255	628	0.00188784	74	0.000222452
Trichoderma reesei	13735	358070	8338	852	0.00237942	1753	0.00489569	1666	0.00465272	1335	0.00372832	1728	0.00482587	935	0.00261122	69	0.0001927
Cryptococcus neoformans	6743	210634	3141	380	0.00180408	845	0.0040117	775	0.00367937	621	0.00294824	408	0.00193701	101	0.000479505	11	5.22233e-05
Ustilago maydis	6806	240790	3783	380	0.00157814	1020	0.00423606	931	0.00386644	679	0.00281988	547	0.00227169	190	0.000789069	36	0.000149508
Taiwanofungus camphoratus	14019	375712	4573	412	0.00109658	1003	0.0026696	1637	0.00435706	894	0.00237948	493	0.00131218	96	0.000255515	38	0.000101141
Dictyostelium discoideum	12734	409987	51470	2808	0.006849	4977	0.0121394	5421	0.0132224	5558	0.0135565	11028	0.0268984	17578	0.0428745	4100	0.0100003
Chlamydomonas reinhardtii	18829	666923	15607	1308	0.00196125	3024	0.00453426	3383	0.00507255	2528	0.00379054	2921	0.00437982	1671	0.00250554	772	0.00115755
Drosophila melanogaster	22084	882881	39105	4244	0.00480699	7839	0.00887889	7367	0.00834427	5152	0.00583544	7712	0.00873504	5746	0.00650824	1045	0.00118362
Aedes aegypti	18998	797258	28869	3720	0.00466599	7663	0.00961169	5559	0.00697265	3997	0.00501343	4775	0.00598928	2851	0.00357601	304	0.000381307
Plasmodium falciparum	5376	166974	1822	220	0.00131757	451	0.00270102	384	0.00229976	288	0.00172482	248	0.00148526	184	0.00110197	47	0.000281481
Caenorhabditis elegans	26548	731037	24635	3096	0.00423508	4907	0.00671238	4237	0.00579588	2786	0.00381102	3970	0.00543064	3019	0.00412975	2620	0.00358395
Danio rerio	46841	1394818	23257	1652	0.00118438	4669	0.00334739	5663	0.00406003	4692	0.00336388	3560	0.0025523	2497	0.0017902	524	0.000375676
Mus musculus	55315	1266431	15262	1420	0.00112126	4116	0.00325008	4024	0.00317743	2317	0.00182955	1845	0.00145685	1264	0.00099808	276	0.000217935
Homo sapiens	79052	1527703	19378	1596	0.00104471	4925	0.00322379	5174	0.00338678	2823	0.00184787	2638	0.00172678	658	0.000430712	1564	0.00102376
Arabidopsis thaliana	39328	845266	10220	1840	0.00217683	2959	0.00350067	2650	0.00313511	1381	0.00163381	920	0.00108841	443	0.000524095	27	3.19426e-05
Tetrahymena thermophila	26972	743985	5044	524	0.000704315	1487	0.0019987	1290	0.00173391	808	0.00108604	613	0.000823941	120	0.000161294	202	0.000271511
Paramecium tetraurelia	39461	817535	5885	728	0.000890482	1780	0.00217728	1860	0.00227513	858	0.0010495	457	0.000558997	83	0.000101525	119	0.00014556
Oxytricha trifallax	23559	749931	8972	988	0.00131745	2374	0.00316562	2376	0.00316829	1545	0.00206019	976	0.00130145	410	0.000546717	303	0.000404037
Stylonychia lemnae	20720	551883	5105	464	0.000840758	1331	0.00241174	1264	0.00229034	790	0.00143146	672	0.00121765	458	0.000829886	126	0.000228309
Pseudocohnilembus persalinus	13175	270854	1006	92	0.000339666	322	0.00118883	347	0.00128113	166	0.000612876	55	0.000203061	24	8.86086e-05	0	0
Stentor coeruleus	30969	645185	4640	348	0.00053938	1232	0.00190953	1219	0.00188938	797	0.0012353	420	0.000650976	143	0.000221642	481	0.000745523
Aristerostoma	27868	404441	4080	520	0.00128573	1211	0.00299426	1182	0.00292255	693	0.00171348	397	0.000981602	77	0.000190386	0	0
Favella ehrenbergii	26477	437331	4111	468	0.00107013	1212	0.00277136	1109	0.00253584	784	0.00179269	416	0.000951225	122	0.000278965	0	0
Pseudokeronopsis	62574	726459	6869	712	0.000980097	1675	0.0023057	1876	0.00258239	974	0.00134075	858	0.00118107	636	0.00087548	138	0.000189963
Strombidium inclinatum	32210	601545	4573	588	0.000977483	1351	0.00224588	1315	0.00218604	757	0.00125843	446	0.000741424	86	0.000142965	30	4.98716e-05
Uronema	13887	139659	802	104	0.000744671	255	0.00182588	214	0.0015323	118	0.000844915	101	0.00072319	10	7.1603e-05	0	0
Climacostomum virens	33899	640734	6727	356	0.000555613	1613	0.00251743	2284	0.00356466	1097	0.0017121	924	0.0014421	366	0.00057122	87	0.000135782
Litonotus pictus	30222	417621	4539	364	0.000871604	1086	0.00260044	1155	0.00276567	786	0.00188209	735	0.00175997	305	0.000730327	108	0.000258608
Protocruzia adherens	40577	603160	14475	1648	0.00273228	3791	0.00628523	3705	0.00614265	2251	0.00373201	2319	0.00384475	761	0.00126169	0	0
Mesodinium pulex	61058	802051	13002	1212	0.00151113	2065	0.00257465	2028	0.00252852	1885	0.00235022	1862	0.00232155	2309	0.00287887	1641	0.002046
Blepharisma japonicum	22714	281201	1573	188	0.000668561	495	0.00176031	487	0.00173186	259	0.000921049	113	0.000401848	31	0.000110241	0	0
Euplotes focardii	36659	398909	3258	332	0.00083227	900	0.00225615	1050	0.00263218	551	0.00138127	344	0.000862352	81	0.000203054	0	0

## Sheet: polyN
species	total protein #	total amino acid #	total N residue #	total polyN residue #	total N residue # (4N(4/4))	total N residue % (4N(4/4))	total N residue # (5N(4/5-5/5))	total N residue % (5N(4/5-5/5))	total N residue # (6N(4/6-6/6))	total N residue % (6N(4/6-6/6))	total N residue # (7N(4/7-7/7))	total N residue % (7N(4/7-7/7))	total N residue # (8-10N(≥50%))	total N residue % (8-10N(≥50%))	total N residue # (11-20N(≥50%))	total N residue % (11-20N(≥50%))	total N residue # (≥21N(≥50%))	total N residue % (≥21N(≥50%))
Saccharomyces cerevisiae S288c	6062	2937762	180873	5415	380	0.00210092	1142	0.00631382	1044	0.00577201	766	0.00423502	887	0.00490399	746	0.00412444	450	0.00248793
Candida albicans	6035	2982020	199531	10950	832	0.00416978	1844	0.00924167	1868	0.00936195	1545	0.00774316	2367	0.0118628	2142	0.0107352	352	0.00176414
Candida auris	5409	2694904	130418	1013	84	0.000644083	223	0.00170989	289	0.00221595	186	0.00142618	137	0.00105047	75	0.000575074	19	0.000145685
Candida tropicalis	6226	3018650	189250	6571	552	0.00291678	1311	0.00692734	1432	0.00756671	903	0.00477147	1321	0.00698018	978	0.00516777	74	0.000391017
Neurospora crassa	10257	5301782	196752	4109	316	0.00160608	808	0.00410669	649	0.00329857	587	0.00298345	702	0.00356794	672	0.00341547	375	0.00190595
Magnaporthe oryzae	12794	5651884	198474	1769	236	0.00118907	326	0.00164253	339	0.00170803	248	0.00124953	238	0.00119915	241	0.00121426	141	0.000710421
Trichoderma reesei	13735	6284515	216086	2460	232	0.00107365	433	0.00200383	404	0.00186963	415	0.00192053	438	0.00202697	364	0.00168451	174	0.000805235
Cryptococcus neoformans	6743	3634003	123734	631	64	0.000517239	125	0.00101023	117	0.000945577	125	0.00101023	124	0.00100215	76	0.000614221	0	0
Ustilago maydis	6806	4006347	134775	983	64	0.000474866	149	0.00110555	146	0.00108329	132	0.00097941	221	0.00163977	213	0.00158041	58	0.000430347
Taiwanofungus camphoratus	14019	6335872	202520	638	72	0.00035552	133	0.000656725	187	0.000923366	152	0.000750543	69	0.000340707	25	0.000123445	0	0
Dictyostelium discoideum	12734	6851769	778668	271149	6456	0.00829108	12915	0.016586	14127	0.0181425	13250	0.0170162	30357	0.0389858	62173	0.0798453	131871	0.169355
Chlamydomonas reinhardtii	18829	14027420	273773	1888	144	0.000525983	311	0.00113598	294	0.00107388	388	0.00141723	316	0.00115424	198	0.000723227	237	0.000865681
Drosophila melanogaster	22084	15045077	711775	20915	2688	0.00377647	4234	0.00594851	3327	0.00467423	2896	0.0040687	4087	0.00574198	3141	0.00441291	542	0.000761477
Aedes aegypti	18998	13375017	673657	19154	2416	0.00358639	4392	0.00651964	4105	0.00609361	2333	0.00346319	3134	0.00465222	2150	0.00319154	624	0.000926287
Plasmodium falciparum	5376	4101305	592068	112977	5764	0.00973537	14238	0.0240479	14982	0.0253045	11299	0.019084	19657	0.0332006	23835	0.0402572	23202	0.0391881
Caenorhabditis elegans	26548	12173600	582686	5157	660	0.00113269	1197	0.00205428	1216	0.00208689	691	0.00118589	940	0.00161322	453	0.000777434	0	0
Danio rerio	46841	24551145	991756	5759	1072	0.00108091	1332	0.00134307	1586	0.00159918	959	0.000966972	488	0.000492057	322	0.000324677	0	0
Mus musculus	55315	23289905	834862	2849	348	0.000416835	946	0.00113312	800	0.000958242	360	0.000431209	304	0.000364132	91	0.000109	0	0
Homo sapiens	79052	28000392	1003978	3470	412	0.000410368	1104	0.00109963	1199	0.00119425	451	0.000449213	267	0.000265942	37	3.68534e-05	0	0
Arabidopsis thaliana	39328	16643018	731904	8412	1564	0.00213689	2062	0.00281731	1952	0.00266702	1057	0.00144418	1249	0.00170651	442	0.000603904	86	0.000117502
Tetrahymena thermophila	26972	16911541	1552438	66430	5268	0.00339337	15448	0.0099508	16235	0.0104577	10403	0.00670107	11278	0.0072647	6814	0.00438923	984	0.000633842
Paramecium tetraurelia	39461	18009409	1244027	18502	2228	0.00179096	4877	0.00392033	5252	0.00422177	2578	0.0020723	1827	0.00146862	986	0.000792587	754	0.000606096
Oxytricha trifallax	23559	15273496	1212859	34439	3644	0.00300447	9035	0.00744934	9950	0.00820376	5940	0.00489752	5034	0.00415052	807	0.00066537	29	2.39104e-05
Stylonychia lemnae	20720	11909904	899118	23338	2288	0.00254472	5961	0.00662983	6581	0.0073194	4026	0.00447772	3458	0.00384599	1024	0.00113889	0	0
Pseudocohnilembus persalinus	13175	7254786	707765	59866	4396	0.0062111	10802	0.0152621	11313	0.0159841	9914	0.0140075	13213	0.0186686	9088	0.0128404	1140	0.0016107
Stentor coeruleus	30969	13122840	822429	5119	416	0.000505819	1607	0.00195397	1963	0.00238683	735	0.000893694	371	0.000451103	27	3.28296e-05	0	0

## Sheet: polyY
species	total protein #	total amino acid #	total Y residue #	total polyY residue #	total Y residue # (4Y(4/4))	total Y residue % (4Y(4/4))	total Y residue # (5Y(4/5-5/5))	total Y residue % (5Y(4/5-5/5))	total Y residue # (6Y(4/6-6/6))	total Y residue % (6Y(4/6-6/6))	total Y residue # (7Y(4/7-7/7))	total Y residue % (7Y(4/7-7/7))	total Y residue # (8-10Y(≥50%))	total Y residue % (8-10Y(≥50%))	total Y residue # (11-20Y(≥50%))	total Y residue % (11-20Y(≥50%))	total Y residue # (≥21Y(≥50%))	total Y residue % (≥21Y(≥50%))
Saccharomyces cerevisiae S288c	6062	2937762	99448	277	60	0.00060333	78	0.000784329	61	0.000613386	38	0.000382109	32	0.000321776	8	8.04441e-05	0	0
Candida albicans	6035	2982020	105852	497	104	0.000982504	139	0.00131315	119	0.00112421	88	0.000831349	47	0.000444016	0	0	0	0
Candida auris	5409	2694904	87566	267	40	0.000456798	69	0.000787977	98	0.00111916	33	0.000376859	27	0.000308339	0	0	0	0
Candida tropicalis	6226	3018650	107795	438	104	0.000964794	133	0.00123382	128	0.00118744	40	0.000371075	33	0.000306137	0	0	0	0
Neurospora crassa	10257	5301782	135946	199	24	0.000176541	56	0.000411928	50	0.000367793	41	0.00030159	20	0.000147117	8	5.88469e-05	0	0
Magnaporthe oryzae	12794	5651884	142478	211	36	0.000252671	94	0.000659751	61	0.000428136	8	5.6149e-05	5	3.50931e-05	7	4.91304e-05	0	0
Trichoderma reesei	13735	6284515	165699	395	76	0.000458663	141	0.000850941	86	0.000519013	66	0.000398313	12	7.24205e-05	14	8.44906e-05	0	0
Cryptococcus neoformans	6743	3634003	92026	119	24	0.000260796	33	0.000358594	45	0.000488992	12	0.000130398	5	5.43325e-05	0	0	0	0
Ustilago maydis	6806	4006347	90328	68	20	0.000221415	20	0.000221415	20	0.000221415	8	8.85661e-05	0	0	0	0	0	0
Taiwanofungus camphoratus	14019	6335872	164972	219	36	0.000218219	73	0.000442499	85	0.000515239	8	4.84931e-05	10	6.06163e-05	7	4.24314e-05	0	0
Dictyostelium discoideum	12734	6851769	242835	1310	256	0.00105421	411	0.00169251	301	0.00123952	208	0.000856549	88	0.000362386	23	9.47145e-05	23	9.47145e-05
Chlamydomonas reinhardtii	18829	14027420	237920	551	52	0.000218561	106	0.000445528	154	0.000647276	148	0.000622058	60	0.000252186	31	0.000130296	0	0
Drosophila melanogaster	22084	15045077	421609	1128	112	0.000265649	292	0.000692585	409	0.000970093	196	0.000464886	112	0.000265649	7	1.66031e-05	0	0
Aedes aegypti	18998	13375017	391715	878	116	0.000296134	256	0.000653536	285	0.00072757	152	0.000388037	62	0.000158278	7	1.78701e-05	0	0
Plasmodium falciparum	5376	4101305	234132	2964	424	0.00181094	706	0.00301539	833	0.00355782	479	0.00204585	429	0.0018323	93	0.000397212	0	0
Caenorhabditis elegans	26548	12173600	372353	931	136	0.000365245	279	0.000749289	246	0.000660663	198	0.000531753	33	8.86256e-05	39	0.000104739	0	0
Danio rerio	46841	24551145	678667	1675	212	0.000312377	425	0.000626228	350	0.000515717	337	0.000496562	129	0.000190078	112	0.000165029	110	0.000162082
Mus musculus	55315	23289905	622338	1066	184	0.000295659	284	0.000456344	250	0.000401711	161	0.000258702	152	0.00024424	35	5.62395e-05	0	0
Homo sapiens	79052	28000392	733444	1433	324	0.000441752	404	0.000550826	262	0.000357219	241	0.000328587	136	0.000185427	66	8.99864e-05	0	0
Arabidopsis thaliana	39328	16643018	470616	975	184	0.000390977	258	0.000548218	290	0.000616214	155	0.000329356	82	0.00017424	6	1.27492e-05	0	0
Tetrahymena thermophila	26972	16911541	729564	3402	456	0.000625031	1111	0.00152283	1074	0.00147211	533	0.000730573	228	0.000312515	0	0	0	0
Paramecium tetraurelia	39461	18009409	765735	3397	352	0.000459689	1186	0.00154884	1268	0.00165593	363	0.000474054	192	0.000250739	36	4.70137e-05	0	0
Oxytricha trifallax	23559	15273496	568125	1803	172	0.00030275	667	0.00117404	671	0.00118108	186	0.000327393	73	0.000128493	34	5.9846e-05	0	0
Stylonychia lemnae	20720	11909904	452661	1488	228	0.000503688	512	0.00113109	448	0.000989703	197	0.000435204	73	0.000161269	30	6.62748e-05	0	0
Pseudocohnilembus persalinus	13175	7254786	309298	1254	152	0.000491435	395	0.00127709	446	0.00144198	169	0.000546399	92	0.000297448	0	0	0	0
Stentor coeruleus	30969	13122840	521500	2136	360	0.000690316	613	0.00117546	570	0.001093	364	0.000697987	196	0.000375839	33	6.3279e-05	0	0

## Sheet: polyW
species	total protein #	total amino acid #	total W residue #	total polyW residue #	total W residue # (4W(4/4))	total W residue % (4W(4/4))	total W residue # (5W(4/5-5/5))	total W residue % (5W(4/5-5/5))	total W residue # (6W(4/6-6/6))	total W residue % (6W(4/6-6/6))	total W residue # (7W(4/7-7/7))	total W residue % (7W(4/7-7/7))	total W residue # (8-10W(≥50%))	total W residue % (8-10W(≥50%))	total W residue # (11-20W(≥50%))	total W residue % (11-20W(≥50%))	total W residue # (≥21W(≥50%))	total W residue % (≥21W(≥50%))
Saccharomyces cerevisiae S288c	6062	2937762	30563	4	0	0	4	0.000130877	0	0	0	0	0	0	0	0	0	0
Candida albicans	6035	2982020	28890	27	4	0.000138456	4	0.000138456	8	0.000276912	0	0	11	0.000380755	0	0	0	0
Candida auris	5409	2694904	28823	8	0	0	8	0.000277556	0	0	0	0	0	0	0	0	0	0
Candida tropicalis	6226	3018650	29715	20	0	0	16	0.000538449	4	0.000134612	0	0	0	0	0	0	0	0
Neurospora crassa	10257	5301782	71241	59	4	5.61474e-05	8	0.000112295	28	0.000393032	19	0.0002667	0	0	0	0	0	0
Magnaporthe oryzae	12794	5651884	80466	33	0	0	12	0.000149131	12	0.000149131	4	4.97104e-05	5	6.2138e-05	0	0	0	0
Trichoderma reesei	13735	6284515	89479	28	8	8.94065e-05	8	8.94065e-05	12	0.00013411	0	0	0	0	0	0	0	0
Cryptococcus neoformans	6743	3634003	49982	43	12	0.000240086	4	8.00288e-05	12	0.000240086	0	0	15	0.000300108	0	0	0	0
Ustilago maydis	6806	4006347	47571	20	4	8.40848e-05	4	8.40848e-05	12	0.000252255	0	0	0	0	0	0	0	0
Taiwanofungus camphoratus	14019	6335872	86270	45	20	0.00023183	8	9.27321e-05	8	9.27321e-05	4	4.63661e-05	5	5.79576e-05	0	0	0	0
Dictyostelium discoideum	12734	6851769	49699	0	0	0	0	0	0	0	0	0	0	0	0	0	0	0
Chlamydomonas reinhardtii	18829	14027420	162660	216	28	0.000172138	44	0.000270503	48	0.000295094	75	0.000461084	10	6.14779e-05	11	6.76257e-05	0	0
Drosophila melanogaster	22084	15045077	138425	66	8	5.7793e-05	12	8.66895e-05	40	0.000288965	0	0	0	0	6	4.33448e-05	0	0
Aedes aegypti	18998	13375017	125340	52	24	0.000191479	4	3.19132e-05	0	0	9	7.18047e-05	15	0.000119674	0	0	0	0
Plasmodium falciparum	5376	4101305	20103	4	0	0	4	0.000198975	0	0	0	0	0	0	0	0	0	0
Caenorhabditis elegans	26548	12173600	130384	64	12	9.20358e-05	32	0.000245429	16	0.000122714	4	3.06786e-05	0	0	0	0	0	0
Danio rerio	46841	24551145	274054	78	0	0	36	0.000131361	24	8.7574e-05	10	3.64892e-05	8	2.91913e-05	0	0	0	0
Mus musculus	55315	23289905	280393	127	4	1.42657e-05	36	0.000128391	40	0.000142657	37	0.000131958	10	3.56642e-05	0	0	0	0
Homo sapiens	79052	28000392	346408	165	12	3.46412e-05	24	6.92825e-05	84	0.000242489	40	0.000115471	5	1.44338e-05	0	0	0	0
Arabidopsis thaliana	39328	16643018	205835	63	12	5.82991e-05	16	7.77322e-05	25	0.000121457	0	0	10	4.85826e-05	0	0	0	0
Tetrahymena thermophila	26972	16911541	85829	4	4	4.66043e-05	0	0	0	0	0	0	0	0	0	0	0	0
Paramecium tetraurelia	39461	18009409	137420	45	0	0	0	0	5	3.63848e-05	12	8.73235e-05	5	3.63848e-05	12	8.73235e-05	11	8.00466e-05
Oxytricha trifallax	23559	15273496	88385	4	0	0	4	4.52565e-05	0	0	0	0	0	0	0	0	0	0
Stylonychia lemnae	20720	11909904	73597	4	0	0	4	5.435e-05	0	0	0	0	0	0	0	0	0	0
Pseudocohnilembus persalinus	13175	7254786	43993	18	0	0	0	0	0	0	9	0.000204578	0	0	9	0.000204578	0	0
Stentor coeruleus	30969	13122840	121915	4	0	0	4	3.28097e-05	0	0	0	0	0	0	0	0	0	0

## Sheet: polyC
species	total protein #	total amino acid #	total C residue #	total polyC residue #	total C residue # (4C(4/4))	total C residue % (4C(4/4))	total C residue # (5C(4/5-5/5))	total C residue % (5C(4/5-5/5))	total C residue # (6C(4/6-6/6))	total C residue % (6C(4/6-6/6))	total C residue # (7C(4/7-7/7))	total C residue % (7C(4/7-7/7))	total C residue # (8-10C(≥50%))	total C residue % (8-10C(≥50%))	total C residue # (11-20C(≥50%))	total C residue % (11-20C(≥50%))	total C residue # (≥21C(≥50%))	total C residue % (≥21C(≥50%))
Saccharomyces cerevisiae S288c	6062	2937762	37311	77	8	0.000214414	28	0.000750449	8	0.000214414	26	0.000696845	7	0.000187612	0	0	0	0
Candida albicans	6035	2982020	31830	38	12	0.000377003	4	0.000125668	16	0.00050267	0	0	0	0	6	0.000188501	0	0
Candida auris	5409	2694904	30787	20	8	0.00025985	8	0.00025985	4	0.000129925	0	0	0	0	0	0	0	0
Candida tropicalis	6226	3018650	33236	100	8	0.000240703	8	0.000240703	10	0.000300879	9	0.000270791	0	0	7	0.000210615	58	0.0017451
Neurospora crassa	10257	5301782	58949	79	4	6.78553e-05	21	0.00035624	32	0.000542842	17	0.000288385	5	8.48191e-05	0	0	0	0
Magnaporthe oryzae	12794	5651884	71781	71	0	0	29	0.000404007	26	0.000362213	4	5.57251e-05	6	8.35876e-05	6	8.35876e-05	0	0
Trichoderma reesei	13735	6284515	79535	179	24	0.000301754	29	0.000364619	24	0.000301754	25	0.000314327	41	0.000515496	36	0.000452631	0	0
Cryptococcus neoformans	6743	3634003	37195	30	8	0.000215083	9	0.000241968	9	0.000241968	4	0.000107541	0	0	0	0	0	0
Ustilago maydis	6806	4006347	42784	71	4	9.34929e-05	24	0.000560957	20	0.000467464	12	0.000280479	5	0.000116866	6	0.000140239	0	0
Taiwanofungus camphoratus	14019	6335872	80621	81	4	4.96149e-05	48	0.000595378	14	0.000173652	4	4.96149e-05	11	0.000136441	0	0	0	0
Dictyostelium discoideum	12734	6851769	97552	161	20	0.000205019	22	0.000225521	30	0.000307528	58	0.000594555	31	0.000317779	0	0	0	0
Chlamydomonas reinhardtii	18829	14027420	185313	619	92	0.000496457	148	0.000798649	113	0.000609779	45	0.000242832	81	0.000437098	20	0.000107926	120	0.000647553
Drosophila melanogaster	22084	15045077	292591	752	92	0.000314432	172	0.000587851	224	0.000765574	112	0.000382787	81	0.000276837	71	0.00024266	0	0
Aedes aegypti	18998	13375017	238986	576	120	0.000502121	162	0.000677864	106	0.000443541	89	0.000372407	24	0.000100424	75	0.000313826	0	0
Plasmodium falciparum	5376	4101305	72403	98	12	0.000165739	25	0.00034529	8	0.000110493	12	0.000165739	13	0.000179551	8	0.000110493	20	0.000276232
Caenorhabditis elegans	26548	12173600	242265	935	80	0.000330217	341	0.00140755	184	0.000759499	98	0.000404516	65	0.000268301	167	0.000689328	0	0
Danio rerio	46841	24551145	573757	2922	188	0.000327665	350	0.000610014	537	0.000935936	409	0.000712845	485	0.000845306	699	0.00121829	254	0.000442696
Mus musculus	55315	23289905	526094	1815	208	0.000395367	362	0.00068809	393	0.000747015	299	0.000568339	261	0.000496109	292	0.000555034	0	0
Homo sapiens	79052	28000392	615521	1915	320	0.000519885	527	0.000856185	530	0.000861059	252	0.000409409	170	0.000276189	116	0.000188458	0	0
Arabidopsis thaliana	39328	16643018	308868	679	176	0.000569823	215	0.00069609	184	0.000595724	41	0.000132743	47	0.000152169	16	5.18021e-05	0	0
Tetrahymena thermophila	26972	16911541	302293	460	104	0.000344037	158	0.000522672	107	0.000353961	54	0.000178635	37	0.000122398	0	0	0	0
Paramecium tetraurelia	39461	18009409	328353	394	48	0.000146184	117	0.000356324	167	0.000508599	19	5.78646e-05	43	0.000130957	0	0	0	0
Oxytricha trifallax	23559	15273496	175630	378	72	0.000409953	116	0.000660479	113	0.000643398	77	0.000438422	0	0	0	0	0	0
Stylonychia lemnae	20720	11909904	139071	278	64	0.000460197	78	0.000560865	58	0.000417053	66	0.000474578	12	8.62869e-05	0	0	0	0
Pseudocohnilembus persalinus	13175	7254786	95798	219	36	0.000375791	41	0.000427984	51	0.00053237	66	0.00068895	17	0.000177457	8	8.35091e-05	0	0
Stentor coeruleus	30969	13122840	254461	525	76	0.000298671	236	0.000927451	142	0.000558042	42	0.000165055	29	0.000113966	0	0	0	0

## Sheet: polyP
species	total protein #	total amino acid #	total P residue #	total polyP residue #	total P residue # (4P(4/4))	total P residue % (4P(4/4))	total P residue # (5P(4/5-5/5))	total P residue % (5P(4/5-5/5))	total P residue # (6P(4/6-6/6))	total P residue % (6P(4/6-6/6))	total P residue # (7P(4/7-7/7))	total P residue % (7P(4/7-7/7))	total P residue # (8-10P(≥50%))	total P residue % (8-10P(≥50%))	total P residue # (11-20P(≥50%))	total P residue % (11-20P(≥50%))	total P residue # (≥21P(≥50%))	total P residue % (≥21P(≥50%))
Saccharomyces cerevisiae S288c	6062	2937762	128612	1814	204	0.00158617	475	0.00369328	443	0.00344447	360	0.00279912	232	0.00180388	100	0.000777532	0	0
Candida albicans	6035	2982020	133405	4546	560	0.00419774	881	0.00660395	933	0.00699374	818	0.0061317	760	0.00569694	566	0.00424272	28	0.000209887
Candida auris	5409	2694904	127221	2605	380	0.00298693	738	0.00580093	595	0.0046769	363	0.0028533	412	0.00323846	117	0.000919659	0	0
Candida tropicalis	6226	3018650	137449	4251	548	0.00398693	968	0.00704261	817	0.00594402	776	0.00564573	765	0.0055657	377	0.00274284	0	0
Neurospora crassa	10257	5301782	348728	19391	1964	0.0056319	4714	0.0135177	4262	0.0122216	3258	0.00934252	3648	0.0104609	1439	0.00412643	106	0.000303962
Magnaporthe oryzae	12794	5651884	357573	15720	1932	0.00540309	3870	0.010823	3770	0.0105433	2677	0.00748658	2365	0.00661403	977	0.00273231	129	0.000360765
Trichoderma reesei	13735	6284515	388072	17062	2036	0.00524645	3981	0.0102584	3660	0.00943124	2939	0.00757334	3199	0.00824332	1182	0.00304583	65	0.000167495
Cryptococcus neoformans	6743	3634003	242828	12712	1392	0.00573245	3114	0.0128239	3172	0.0130627	2377	0.00978882	1965	0.00809215	555	0.00228557	137	0.000564185
Ustilago maydis	6806	4006347	234948	7611	972	0.00413709	1952	0.00830822	1793	0.00763148	1284	0.00546504	1055	0.00449036	480	0.00204301	75	0.00031922
Taiwanofungus camphoratus	14019	6335872	423820	23163	2000	0.00471898	5818	0.0137275	5506	0.0129914	3858	0.00910292	4262	0.0100562	1663	0.00392384	56	0.000132132
Dictyostelium discoideum	12734	6851769	270937	11129	1608	0.00593496	2180	0.00804615	2087	0.0077029	1723	0.00635941	1863	0.00687614	1258	0.00464315	410	0.00151327
Chlamydomonas reinhardtii	18829	14027420	1084646	186277	12844	0.0118417	22621	0.0208557	21125	0.0194764	16115	0.0148574	22250	0.0205136	30087	0.027739	61235	0.0564562
Drosophila melanogaster	22084	15045077	870769	47002	5360	0.00615548	10296	0.011824	10083	0.0115794	7814	0.00897368	9938	0.0114129	3453	0.00396546	58	6.66078e-05
Aedes aegypti	18998	13375017	741318	34372	3584	0.00483463	8397	0.0113271	8135	0.0109737	5899	0.00795745	5980	0.00806671	2267	0.00305807	110	0.000148384
Plasmodium falciparum	5376	4101305	81115	844	72	0.000887629	189	0.00233003	183	0.00225606	137	0.00168896	120	0.00147938	129	0.00159033	14	0.000172594
Caenorhabditis elegans	26548	12173600	620041	24906	2936	0.00473517	6100	0.00983806	5187	0.00836558	3843	0.00619798	4639	0.00748176	1809	0.00291755	392	0.000632216
Danio rerio	46841	24551145	1328618	55162	5588	0.00420587	12508	0.00941429	12385	0.00932172	9338	0.00702836	9995	0.00752285	4895	0.00368428	453	0.000340956
Mus musculus	55315	23289905	1433604	74129	6600	0.00460378	14913	0.0104025	16354	0.0114076	12038	0.00839702	13369	0.00932545	8992	0.0062723	1863	0.00129952
Homo sapiens	79052	28000392	1754985	91443	8720	0.0049687	19014	0.0108343	20464	0.0116605	15847	0.00902971	16908	0.00963427	9628	0.00548609	862	0.000491172
Arabidopsis thaliana	39328	16643018	794521	33595	7568	0.00952524	7111	0.00895005	5797	0.00729622	3987	0.00501812	5751	0.00723832	2879	0.00362357	502	0.000631827
Tetrahymena thermophila	26972	16911541	438450	2729	436	0.000994412	974	0.00222146	607	0.00138442	337	0.000768617	206	0.000469837	52	0.0001186	117	0.000266849
Paramecium tetraurelia	39461	18009409	524995	4864	524	0.000998105	1245	0.00237145	869	0.00165525	769	0.00146478	800	0.00152382	646	0.00123049	11	2.09526e-05
Oxytricha trifallax	23559	15273496	475028	2810	820	0.00172621	809	0.00170306	593	0.00124835	368	0.000774691	141	0.000296825	79	0.000166306	0	0
Stylonychia lemnae	20720	11909904	366129	1921	404	0.00110344	606	0.00165515	455	0.00124273	229	0.000625463	140	0.000382379	87	0.000237621	0	0
Pseudocohnilembus persalinus	13175	7254786	177785	631	72	0.000404984	203	0.00114183	161	0.000905588	130	0.00073122	33	0.000185617	32	0.000179993	0	0
Stentor coeruleus	30969	13122840	465617	4928	624	0.00134016	1359	0.00291871	1449	0.003112	799	0.001716	484	0.00103948	213	0.000457458	0	0

## Sheet: polyA
species	total protein #	total amino acid #	total A residue #	total polyA residue #	total A residue # (4A(4/4))	total A residue % (4A(4/4))	total A residue # (5A(4/5-5/5))	total A residue % (5A(4/5-5/5))	total A residue # (6A(4/6-6/6))	total A residue % (6A(4/6-6/6))	total A residue # (7A(4/7-7/7))	total A residue % (7A(4/7-7/7))	total A residue # (8-10A(≥50%))	total A residue % (8-10A(≥50%))	total A residue # (11-20A(≥50%))	total A residue % (11-20A(≥50%))	total A residue # (≥21A(≥50%))	total A residue % (≥21A(≥50%))
Saccharomyces cerevisiae S288c	6062	2937762	161254	3372	268	0.00166197	890	0.00551924	853	0.00528979	479	0.00297047	617	0.00382626	179	0.00111005	86	0.00053332
Candida albicans	6035	2982020	150552	3873	248	0.00164727	963	0.00639646	805	0.00534699	713	0.00473591	736	0.00488868	393	0.00261039	15	9.96333e-05
Candida auris	5409	2694904	180543	4834	432	0.00239278	1219	0.00675185	1200	0.00664662	840	0.00465263	767	0.0042483	359	0.00198845	17	9.41604e-05
Candida tropicalis	6226	3018650	152454	3639	280	0.00183662	803	0.00526716	805	0.00528028	548	0.00359453	717	0.00470306	368	0.00241384	118	0.000774004
Neurospora crassa	10257	5301782	460066	24749	2384	0.00518187	5955	0.0129438	5946	0.0129242	3820	0.00830316	4272	0.00928562	2177	0.00473193	195	0.000423852
Magnaporthe oryzae	12794	5651884	533228	29169	3256	0.00610621	7467	0.0140034	7331	0.0137483	4205	0.00788593	4891	0.00917244	1826	0.00342443	193	0.000361946
Trichoderma reesei	13735	6284515	577271	29113	3228	0.00559183	7234	0.0125314	6752	0.0116964	4401	0.0076238	5084	0.00880696	2145	0.00371576	269	0.000465986
Cryptococcus neoformans	6743	3634003	303877	11316	984	0.00323815	2930	0.00964206	2983	0.00981647	1895	0.00623608	1762	0.0057984	717	0.00235951	45	0.000148086
Ustilago maydis	6806	4006347	423029	28026	2360	0.00557881	6292	0.0148737	6288	0.0148642	4440	0.0104957	5335	0.0126114	3013	0.00712244	298	0.000704443
Taiwanofungus camphoratus	14019	6335872	552498	18292	1696	0.00306969	4696	0.00849958	5229	0.00946429	3256	0.00589323	2606	0.00471676	744	0.00134661	65	0.000117647
Dictyostelium discoideum	12734	6851769	207481	3279	356	0.00171582	959	0.00462211	683	0.00329187	547	0.00263639	545	0.00262675	189	0.000910927	0	0
Chlamydomonas reinhardtii	18829	14027420	2404686	719452	57780	0.0240281	116023	0.0482487	108753	0.0452254	86265	0.0358737	163310	0.0679132	158696	0.0659945	28625	0.0119038
Drosophila melanogaster	22084	15045077	1115434	75784	5956	0.00533963	14210	0.0127394	12981	0.0116376	10783	0.00966709	16185	0.01451	14583	0.0130738	1086	0.000973612
Aedes aegypti	18998	13375017	875617	34582	3552	0.00405657	7382	0.00843063	7326	0.00836667	5044	0.00576051	6251	0.00713897	4574	0.00522375	453	0.000517349
Plasmodium falciparum	5376	4101305	80322	1218	44	0.000547795	370	0.00460646	276	0.00343617	245	0.00305022	225	0.00280123	47	0.000585145	11	0.000136949
Caenorhabditis elegans	26548	12173600	788756	20376	2488	0.00315433	5830	0.00739139	4776	0.0060551	2750	0.0034865	2952	0.0037426	1497	0.00189793	83	0.000105229
Danio rerio	46841	24551145	1519441	33263	3912	0.00257463	8790	0.00578502	8888	0.00584952	4805	0.00316235	4780	0.00314589	1765	0.00116161	323	0.000212578
Mus musculus	55315	23289905	1593248	51009	5244	0.00329139	12698	0.00796988	11296	0.00708992	7837	0.00491888	7889	0.00495152	5057	0.00317402	988	0.000620117
Homo sapiens	79052	28000392	1943686	65737	6264	0.00322274	16881	0.00868504	15934	0.00819783	9589	0.00493341	10519	0.00541188	5992	0.0030828	558	0.000287083
Arabidopsis thaliana	39328	16643018	1041830	28147	3092	0.00296785	8816	0.00846203	7196	0.00690708	4270	0.00409856	3474	0.00333452	1060	0.00101744	239	0.000229404
Tetrahymena thermophila	26972	16911541	552036	3478	460	0.000833279	1094	0.00198175	1024	0.00185495	493	0.000893058	363	0.000657566	44	7.97049e-05	0	0
Paramecium tetraurelia	39461	18009409	626396	3725	288	0.000459773	1234	0.00197	984	0.00157089	686	0.00109515	387	0.00061782	131	0.000209133	15	2.39465e-05
Oxytricha trifallax	23559	15273496	595832	3700	520	0.000872729	1156	0.00194014	1210	0.00203077	471	0.000790491	307	0.000515246	36	6.04197e-05	0	0
Stylonychia lemnae	20720	11909904	469963	2972	372	0.000791552	1008	0.00214485	874	0.00185972	455	0.000968161	215	0.000457483	48	0.000102136	0	0
Pseudocohnilembus persalinus	13175	7254786	207966	935	84	0.000403912	284	0.00136561	242	0.00116365	190	0.000913611	114	0.000548167	21	0.000100978	0	0
Stentor coeruleus	30969	13122840	567143	3319	340	0.000599496	998	0.0017597	1061	0.00187078	493	0.000869269	325	0.000573048	68	0.000119899	34	5.99496e-05

## Sheet: polyD
species	total protein #	total amino acid #	total D residue #	total polyD residue #	total D residue # (4D(4/4))	total D residue % (4D(4/4))	total D residue # (5D(4/5-5/5))	total D residue % (5D(4/5-5/5))	total D residue # (6D(4/6-6/6))	total D residue % (6D(4/6-6/6))	total D residue # (7D(4/7-7/7))	total D residue % (7D(4/7-7/7))	total D residue # (8-10D(≥50%))	total D residue % (8-10D(≥50%))	total D residue # (11-20D(≥50%))	total D residue % (11-20D(≥50%))	total D residue # (≥21D(≥50%))	total D residue % (≥21D(≥50%))
Saccharomyces cerevisiae S288c	6062	2937762	171416	4724	428	0.00249685	985	0.00574625	1008	0.00588043	714	0.00416531	849	0.00495286	494	0.00288188	246	0.00143511
Candida albicans	6035	2982020	176065	7510	728	0.00413484	1499	0.0085139	1474	0.00837191	1059	0.00601482	1691	0.00960441	1005	0.00570812	54	0.000306705
Candida auris	5409	2694904	158964	4320	428	0.00269243	1130	0.00710853	917	0.0057686	688	0.00432802	734	0.0046174	345	0.0021703	78	0.000490677
Candida tropicalis	6226	3018650	180597	7888	808	0.00447405	1646	0.00911422	1578	0.00873769	1129	0.00625149	1626	0.00900347	909	0.00503331	192	0.00106314
Neurospora crassa	10257	5301782	299107	11503	1068	0.00357063	2689	0.00899009	2514	0.00840502	1772	0.0059243	2238	0.00748227	1150	0.00384478	72	0.000240717
Magnaporthe oryzae	12794	5651884	324474	9947	956	0.00294631	2420	0.00745822	2271	0.00699902	1542	0.00475231	1737	0.00535328	933	0.00287542	88	0.000271208
Trichoderma reesei	13735	6284515	362410	11710	1144	0.00315665	2499	0.00689551	2528	0.00697552	1842	0.00508264	2115	0.00583593	1501	0.00414172	81	0.000223504
Cryptococcus neoformans	6743	3634003	195372	4492	488	0.0024978	1092	0.00558934	1063	0.0054409	669	0.00342424	820	0.00419712	278	0.00142293	82	0.000419712
Ustilago maydis	6806	4006347	232215	10014	812	0.00349676	2028	0.00873329	1908	0.00821652	1480	0.0063734	1935	0.0083328	1468	0.00632173	383	0.00164933
Taiwanofungus camphoratus	14019	6335872	348471	8364	772	0.00221539	2052	0.00588858	1982	0.0056877	1424	0.00408642	1457	0.00418112	652	0.00187103	25	7.1742e-05
Dictyostelium discoideum	12734	6851769	356417	18864	1556	0.00436567	3226	0.0090512	3062	0.00859106	2573	0.00721907	4085	0.0114613	3619	0.0101538	743	0.00208464
Chlamydomonas reinhardtii	18829	14027420	592245	19145	1812	0.00305954	3987	0.00673201	3846	0.00649393	3497	0.00590465	3458	0.0058388	1809	0.00305448	736	0.00124273
Drosophila melanogaster	22084	15045077	779682	21638	1600	0.00205212	5395	0.00691949	4815	0.00617559	3952	0.00506873	3641	0.00466985	1951	0.0025023	284	0.000364251
Aedes aegypti	18998	13375017	738777	19486	2212	0.00299414	4655	0.00630095	4523	0.00612228	2696	0.00364927	3600	0.00487292	1696	0.00229569	104	0.000140773
Plasmodium falciparum	5376	4101305	265148	11009	1348	0.00508395	1857	0.00700364	1590	0.00599665	1132	0.00426931	1626	0.00613242	1513	0.00570625	1943	0.00732798
Caenorhabditis elegans	26548	12173600	660000	13778	1956	0.00296364	3703	0.00561061	3243	0.00491364	2052	0.00310909	1950	0.00295455	838	0.0012697	36	5.45455e-05
Danio rerio	46841	24551145	1287807	22860	1948	0.00151265	4892	0.00379871	5301	0.0041163	3620	0.00281098	4096	0.0031806	2120	0.00164621	883	0.000685662
Mus musculus	55315	23289905	1124118	14900	1388	0.00123475	3394	0.00301926	3384	0.00301036	2778	0.00247127	2742	0.00243925	1043	0.000927839	171	0.000152119
Homo sapiens	79052	28000392	1347502	18106	1404	0.00104193	4272	0.00317031	4064	0.00301595	3823	0.0028371	3350	0.00248608	966	0.000716882	227	0.00016846
Arabidopsis thaliana	39328	16643018	899414	19558	2404	0.00267285	4885	0.00543131	4265	0.00474198	2914	0.00323989	3037	0.00337664	1577	0.00175336	476	0.000529233
Tetrahymena thermophila	26972	16911541	819101	10673	1032	0.00125992	2779	0.00339274	2608	0.00318398	1593	0.00194482	1798	0.00219509	814	0.000993772	49	5.98217e-05
Paramecium tetraurelia	39461	18009409	900649	8141	1036	0.00115028	2226	0.00247155	2301	0.00255482	1158	0.00128574	1057	0.0011736	348	0.000386388	15	1.66547e-05
Oxytricha trifallax	23559	15273496	859621	15245	1692	0.00196831	3963	0.00461017	4089	0.00475675	2520	0.00293152	2161	0.0025139	733	0.000852701	87	0.000101207
Stylonychia lemnae	20720	11909904	677493	10998	1168	0.001724	3254	0.004803	2838	0.00418897	1834	0.00270704	1335	0.0019705	516	0.000761631	53	7.82296e-05
Pseudocohnilembus persalinus	13175	7254786	386552	7093	540	0.00139697	1551	0.0040124	1576	0.00407707	1054	0.00272667	1004	0.00259732	579	0.00149786	789	0.00204112
Stentor coeruleus	30969	13122840	664616	5682	580	0.000872684	1666	0.00250671	1479	0.00222535	824	0.00123981	560	0.000842592	282	0.000424305	291	0.000437847

[truncated: 10 more sheets: polyE, polyG, polyF, polyH, polyI, polyL, polyV, polyM, polyR, polyK]
