# Supplementary material for: Noncanonical usage of stop codons in ciliates expands proteins with Q-rich motifs
Source: bioRxiv preprint, doi:10.1101/2020.12.08.407247, version 3 (2023-11-13)
Supplement: Dataset DS7 [file 407247_file21.xlsx]

## Sheet: SCD
GO domain	GO ID	GO term	SCD protein	total number	number / total	raw p-value under-representation	raw p-value over-representation	FWER under-representation	FWER over-representation	Gene Name
biological_process	GO:0032197	transposition, RNA-mediated	82	92	0.891304	1	1.35644e-42	1	0	YM12B_YEAST	YM13A_YEAST	YM13B_YEAST	YD21A_YEAST	YG12A_YEAST	YE12A_YEAST	YO22A_YEAST	YO22B_YEAST	YL21B_YEAST	YE12B_YEAST	YG13B_YEAST	YC21A_YEAST	YP14A_YEAST	YM11A_YEAST	YP12B_YEAST	YE11A_YEAST	YG13A_YEAST	YD11B_YEAST	YD15B_YEAST	YD12B_YEAST	YD13A_YEAST	YE11B_YEAST	YM14B_YEAST	YP12A_YEAST	YB11B_YEAST	YB21A_YEAST	YL13A_YEAST	YD11A_YEAST	YM11B_YEAST	YM14A_YEAST	YB12B_YEAST	YD14A_YEAST	YD22A_YEAST	YH11A_YEAST	YN12A_YEAST	YO12B_YEAST	YG11A_YEAST	YF21B_YEAST	YD21B_YEAST	YJ12B_YEAST
biological_process	GO:0045944	positive regulation of transcription by RNA polymerase II	77	229	0.336245	1	1.17963e-07	1	0	PDR1_YEAST	PDR3_YEAST	PDC2_YEAST	SOK2_YEAST	RDS2_YEAST	REB1_YEAST	TAF5_YEAST	TAF6_YEAST	TAF8_YEAST	TAF9_YEAST	T2AG_YEAST	SNF5_YEAST	RTG1_YEAST	RTG3_YEAST	SFL1_YEAST	SNF12_YEAST	SNF2_YEAST	RFX1_YEAST	SWI1_YEAST	HCM1_YEAST	ACE2_YEAST	MED2_YEAST	MED1_YEAST	MED8_YEAST	MCE1_YEAST	BAS1_YEAST	CYC8_YEAST	HAA1_YEAST	CBF1_YEAST	MIG1_YEAST	MGA2_YEAST	GTR2_YEAST	LEUR_YEAST	RLM1_YEAST	ACA2_YEAST	POG1_YEAST	NUP84_YEAST	MED14_YEAST	SET1_YEAST	LYS14_YEAST
biological_process	GO:0006357	regulation of transcription by RNA polymerase II	62	177	0.350282	1	1.36569e-07	1	0	SPT7_YEAST	REB1_YEAST	TAF5_YEAST	TAF6_YEAST	TAF9_YEAST	SNF5_YEAST	RTG1_YEAST	RTG3_YEAST	SFL1_YEAST	SNT1_YEAST	SNF12_YEAST	SNF2_YEAST	RFX1_YEAST	SWI1_YEAST	HCM1_YEAST	HAP2_YEAST	MOT1_YEAST	ACE2_YEAST	FUN19_YEAST	MED8_YEAST	CYC8_YEAST	EPL1_YEAST	FKH2_YEAST	CBF1_YEAST	HMAL1_YEAST	HMAL2_YEAST	CUP9_YEAST	FCP1_YEAST	MTAL2_YEAST	MET28_YEAST	NOT1_YEAST	RLM1_YEAST	MED5_YEAST	MED14_YEAST	SGF73_YEAST	SIF2_YEAST	SKO1_YEAST	SPT3_YEAST	SUS1_YEAST	STP2_YEAST
biological_process	GO:0006310	DNA recombination	55	76	0.723684	1	1.59477e-13	1	0	RDH54_YEAST	PIF1_YEAST	MSH3_YEAST	NSE4_YEAST	MHR1_YEAST	NMD2_YEAST	NSE5_YEAST	DNLI1_YEAST	HPR1_YEAST	SGS1_YEAST	YM12B_YEAST	YM13B_YEAST	YO22B_YEAST	YL21B_YEAST	YE12B_YEAST	YG13B_YEAST	YP12B_YEAST	YD11B_YEAST	YD15B_YEAST	YD12B_YEAST	YE11B_YEAST	YM14B_YEAST	YB11B_YEAST	YM11B_YEAST	YB12B_YEAST	YO12B_YEAST	YF21B_YEAST	YD21B_YEAST	YJ12B_YEAST	YC21B_YEAST	YH11B_YEAST	YN11B_YEAST	YL12B_YEAST	YD22B_YEAST	YD13B_YEAST	YL13B_YEAST	YO11B_YEAST	NUC1_YEAST	THO2_YEAST	YG12B_YEAST
biological_process	GO:0015074	DNA integration	40	47	0.851064	1	1.07257e-20	1	0	YM12B_YEAST	YM13B_YEAST	YO22B_YEAST	YL21B_YEAST	YE12B_YEAST	YG13B_YEAST	YP12B_YEAST	YD11B_YEAST	YD15B_YEAST	YD12B_YEAST	YE11B_YEAST	YM14B_YEAST	YB11B_YEAST	YM11B_YEAST	YB12B_YEAST	YO12B_YEAST	YF21B_YEAST	YD21B_YEAST	YJ12B_YEAST	YC21B_YEAST	YH11B_YEAST	YN11B_YEAST	YL12B_YEAST	YD22B_YEAST	YD13B_YEAST	YL13B_YEAST	YO11B_YEAST	YG12B_YEAST	YP14B_YEAST	YN12B_YEAST	YD14B_YEAST	YG22B_YEAST	YD23B_YEAST	YJ11B_YEAST	YB21B_YEAST	YP11B_YEAST	YL11B_YEAST	YG11B_YEAST	YO21B_YEAST	YP13B_YEAST
biological_process	GO:0007049	cell cycle	23	95	0.242105	1	1.16525e-08	1	0	SYP1_YEAST	RIF1_YEAST	SLG1_YEAST	SDA1_YEAST	STE50_YEAST	CDC13_YEAST	MMS1_YEAST	DIA2_YEAST	EGT2_YEAST	EPL1_YEAST	KIP2_YEAST	CENPT_YEAST	LDB19_YEAST	MOB2_YEAST	PAT1_YEAST	TBF1_YEAST	WHI3_YEAST	NUP59_YEAST	RAD53_YEAST	BNI5_YEAST	MCM1_YEAST	NDE1_YEAST	DBF2_YEAST
biological_process	GO:0006355	regulation of transcription, DNA-templated	20	69	0.289855	1	1.22949e-08	1	0	REB1_YEAST	RSC30_YEAST	RSC3_YEAST	SNT1_YEAST	MHR1_YEAST	BAS1_YEAST	CHS5_YEAST	DPO5_YEAST	PFD5_YEAST	FHL1_YEAST	LEUR_YEAST	NUP84_YEAST	SIF2_YEAST	SWI4_YEAST	SET3_YEAST	SEF1_YEAST	RSF2_YEAST	NUP59_YEAST	ARP5_YEAST	ARP9_YEAST
biological_process	GO:0006366	transcription by RNA polymerase II	13	53	0.245283	1	1.72931e-07	1	0	TAF5_YEAST	TAF6_YEAST	TAF8_YEAST	TAF9_YEAST	MED5_YEAST	SPT3_YEAST	RPB1_YEAST	TAF12_YEAST	TAF1_YEAST	TAF10_YEAST	TAF11_YEAST	RAD2_YEAST	INO80_YEAST
biological_process	GO:0006351	transcription, DNA-templated	10	28	0.357143	1	1.8666e-08	1	0	PDR1_YEAST	PDR3_YEAST	STB4_YEAST	SEF1_YEAST	RSF2_YEAST	YP022_YEAST	YL278_YEAST	YKW2_YEAST	HAL9_YEAST	GAL4_YEAST
biological_process	GO:0045893	positive regulation of transcription, DNA-templated	7	18	0.388889	1	5.46101e-09	1	0	NUP85_YEAST	NU100_YEAST	NUP84_YEAST	STP1_YEAST	WHI3_YEAST	YAK1_YEAST	NU145_YEAST
biological_process	GO:0080090	regulation of primary metabolic process	2	5	0.4	1	1.85484e-08	1	0	MDG1_YEAST	SIP1_YEAST
biological_process	GO:0051252	regulation of RNA metabolic process	1	2	0.5	1	1.1712e-08	1	0	PBP2_YEAST
biological_process	GO:0019222	regulation of metabolic process	1	2	0.5	1	6.08318e-09	1	0	INO80_YEAST
biological_process	GO:0006259	DNA metabolic process	1	4	0.25	1	3.43801e-10	1	0	DPOD_YEAST
biological_process	GO:0032196	transposition	0	3	0	1	2.37861e-39	1	0
biological_process	GO:0051173	positive regulation of nitrogen compound metabolic process	0	1	0	1	7.12548e-08	1	0
biological_process	GO:0032774	RNA biosynthetic process	0	2	0	1	3.69868e-08	1	0
biological_process	GO:0035556	intracellular signal transduction	19	61	0.311475	1	5.28105e-07	1	0.001	HSL1_YEAST	NNK1_YEAST	ELM1_YEAST	FRK1_YEAST	KIN1_YEAST	KIN2_YEAST	KIN4_YEAST	DCK1_YEAST	SCH9_YEAST	PKH1_YEAST	SNF1_YEAST	YP150_YEAST	NPR1_YEAST	CBK1_YEAST	CLA4_YEAST	GCN2_YEAST	DBF20_YEAST	CDC24_YEAST	DBF2_YEAST
biological_process	GO:0000280	nuclear division	1	6	0.166667	1	2.32824e-07	1	0.001	DBF2_YEAST
biological_process	GO:0007165	signal transduction	10	45	0.222222	0.999999	1.60255e-06	1	0.002	PDE2_YEAST	MDG1_YEAST	KCC1_YEAST	GPA2_YEAST	CSS1_YEAST	MOB2_YEAST	RLM1_YEAST	SIP1_YEAST	MCK1_YEAST	YHY2_YEAST
biological_process	GO:0010468	regulation of gene expression	3	19	0.157895	0.999999	1.59178e-06	1	0.002	CYC8_YEAST	PBP2_YEAST	CLA4_YEAST
biological_process	GO:0018105	peptidyl-serine phosphorylation	21	47	0.446809	0.999998	6.2453e-06	1	0.003	MPS1_YEAST	HSL1_YEAST	HRR25_YEAST	NNK1_YEAST	KC11_YEAST	KC12_YEAST	KC13_YEAST	KIN1_YEAST	KIN2_YEAST	SCH9_YEAST	PDK1_YEAST	PKH1_YEAST	TDA1_YEAST	YAK1_YEAST	MCK1_YEAST	ATG1_YEAST	NPR1_YEAST	CDC15_YEAST	CBK1_YEAST	DBF20_YEAST	DBF2_YEAST
biological_process	GO:0045005	DNA-dependent DNA replication maintenance of fidelity	2	3	0.666667	0.999999	4.89971e-06	1	0.003	SEN1_YEAST	DPOD_YEAST
biological_process	GO:0006139	nucleobase-containing compound metabolic process	1	5	0.2	0.999998	2.84905e-06	1	0.003	KCY_YEAST
biological_process	GO:0051276	chromosome organization	3	11	0.272727	0.999995	8.27136e-06	1	0.004	PIF1_YEAST	SGS1_YEAST	SWC4_YEAST
biological_process	GO:0006302	double-strand break repair	14	38	0.368421	0.999992	1.7776e-05	1	0.013	RT107_YEAST	SNF2_YEAST	MMS22_YEAST	MMS4_YEAST	FUMH_YEAST	NUP84_YEAST	PDS5_YEAST	RAD50_YEAST	RAD51_YEAST	RAD57_YEAST	RAD9_YEAST	NU145_YEAST	DPOE_YEAST	ATM_YEAST
biological_process	GO:0000278	mitotic cell cycle	8	24	0.333333	0.999989	1.92863e-05	1	0.013	TOM1_YEAST	CTF4_YEAST	DNLI1_YEAST	SAC3_YEAST	SPC97_YEAST	DYHC_YEAST	KAR3_YEAST	DPOE_YEAST
biological_process	GO:0006607	NLS-bearing protein import into nucleus	11	17	0.647059	0.999997	3.17142e-05	1	0.026	IMB5_YEAST	IMB1_YEAST	IMB4_YEAST	NUP1_YEAST	NUP49_YEAST	IMA1_YEAST	NU100_YEAST	NUP2_YEAST	NUP57_YEAST	NUP59_YEAST	NU145_YEAST
biological_process	GO:0000920	septum digestion after cytokinesis	10	18	0.555556	0.999995	4.0461e-05	1	0.036	CHIT_YEAST	CHS1_YEAST	EGT2_YEAST	MOB2_YEAST	ENG1_YEAST	SDS24_YEAST	BOB1_YEAST	CBK1_YEAST	BOI2_YEAST	DSE2_YEAST
biological_process	GO:0006725	cellular aromatic compound metabolic process	0	2	0	0.999967	4.54541e-05	1	0.037
biological_process	GO:0006281	DNA repair	27	105	0.257143	0.999974	4.6364e-05	1	0.038	SMC5_YEAST	RDH54_YEAST	DNA2_YEAST	MMS4_YEAST	CTF4_YEAST	HRR25_YEAST	NSE4_YEAST	NSE5_YEAST	EPL1_YEAST	HIM1_YEAST	NSE2_YEAST	SGS1_YEAST	SWC4_YEAST	SRS2_YEAST	RRM3_YEAST	PDS5_YEAST	YEN1_YEAST	TOF1_YEAST	MSH1_YEAST	RAD53_YEAST	RAD9_YEAST	INO80_YEAST	MRC1_YEAST	EAF3_YEAST	DDC1_YEAST	ATM_YEAST	2A5D_YEAST
biological_process	GO:0046777	protein autophosphorylation	12	25	0.48	0.999991	4.80918e-05	1	0.041	MPS1_YEAST	HSL1_YEAST	NNK1_YEAST	ELM1_YEAST	KIN1_YEAST	KIN2_YEAST	PRK1_YEAST	SSK2_YEAST	ATG1_YEAST	GCN2_YEAST	ARK1_YEAST	AKL1_YEAST
biological_process	GO:0006897	endocytosis	33	100	0.33	0.999937	0.000138454	1	0.101	SYP1_YEAST	INP53_YEAST	EDE1_YEAST	HRR25_YEAST	BRE4_YEAST	ENT1_YEAST	IRS4_YEAST	KC11_YEAST	KC12_YEAST	KC13_YEAST	AP18A_YEAST	ENT2_YEAST	KES1_YEAST	INP51_YEAST	SLA1_YEAST	PAN1_YEAST	PKH1_YEAST	SCD5_YEAST	OSH2_YEAST	PAL1_YEAST	SDS24_YEAST	SVL3_YEAST	VPS33_YEAST	RHO5_YEAST	VPS1_YEAST	PIK1_YEAST	MYO5_YEAST	GVP36_YEAST	HES1_YEAST	INP52_YEAST	CLH_YEAST	AGE2_YEAST	DSC3_YEAST
biological_process	GO:0006606	protein import into nucleus	22	55	0.4	0.999953	0.000139094	1	0.102	PBS2_YEAST	SYO1_YEAST	PO152_YEAST	IMB5_YEAST	KA122_YEAST	IMB1_YEAST	IMB4_YEAST	NUP1_YEAST	NUP49_YEAST	IMA1_YEAST	NUP85_YEAST	NU116_YEAST	NTF2_YEAST	NU100_YEAST	NUP84_YEAST	NUP57_YEAST	POM34_YEAST	RTP1_YEAST	NUP82_YEAST	MTR10_YEAST	NU145_YEAST	NU170_YEAST
biological_process	GO:0031297	replication fork processing	4	8	0.5	0.99998	0.000188694	1	0.132	MMS1_YEAST	MMS22_YEAST	MMS4_YEAST	YEN1_YEAST
biological_process	GO:0140014	mitotic nuclear division	1	1	1	0.999868	0.000257636	1	0.199	NIS1_YEAST
biological_process	GO:0051301	cell division	38	167	0.227545	0.999839	0.000274376	1	0.206	STU1_YEAST	NKP1_YEAST	CDC13_YEAST	CDT1_YEAST	MMS1_YEAST	MMS22_YEAST	BUB2_YEAST	NUD1_YEAST	CDC27_YEAST	DNLI1_YEAST	CDC4_YEAST	CDC20_YEAST	BIM1_YEAST	KIP1_YEAST	KIP2_YEAST	CENPT_YEAST	DSN1_YEAST	MOB2_YEAST	POG1_YEAST	PAT1_YEAST	SCC3_YEAST	SMC2_YEAST	SPC72_YEAST	SMC4_YEAST	PDS5_YEAST	MAD1_YEAST	VPS1_YEAST	NUP59_YEAST	ACL4_YEAST	MPC70_YEAST	NDC80_YEAST	NDE1_YEAST	NDT80_YEAST	KAR3_YEAST	MPIP_YEAST	CND1_YEAST	AMN1_YEAST	DAM1_YEAST
biological_process	GO:0016192	vesicle-mediated transport	5	69	0.0724638	0.99981	0.000296112	1	0.215	KC13_YEAST	VPS45_YEAST	SEC39_YEAST	VPS41_YEAST	VPS33_YEAST
biological_process	GO:0006974	cellular response to DNA damage stimulus	11	59	0.186441	0.999801	0.000324932	1	0.24	DNA2_YEAST	MMS22_YEAST	MMS4_YEAST	FUMH_YEAST	DEF1_YEAST	SLX4_YEAST	UMP1_YEAST	UBA1_YEAST	YEN1_YEAST	UFO1_YEAST	ATM_YEAST
biological_process	GO:0006261	DNA-dependent DNA replication	8	26	0.307692	0.999833	0.000352676	1	0.245	SNF2_YEAST	SLD5_YEAST	SWI1_YEAST	DNA2_YEAST	CTF4_YEAST	SLX4_YEAST	DPOD_YEAST	DPOE_YEAST
biological_process	GO:0000147	actin cortical patch assembly	9	15	0.6	0.999949	0.00039513	1	0.267	SYP1_YEAST	ENT1_YEAST	ENT2_YEAST	PRK1_YEAST	SLA1_YEAST	PAN1_YEAST	ARK1_YEAST	AKL1_YEAST	AIM3_YEAST
biological_process	GO:0007059	chromosome segregation	11	52	0.211538	0.99977	0.000416256	1	0.27	CBF3A_YEAST	MPS1_YEAST	RSC2_YEAST	CBF1_YEAST	CENPT_YEAST	DSN1_YEAST	CENPW_YEAST	NU170_YEAST	NDC80_YEAST	GIP3_YEAST	AFT1_YEAST
biological_process	GO:0044396	actin cortical patch organization	5	12	0.416667	0.999917	0.000420451	1	0.275	EDE1_YEAST	SLA1_YEAST	PAN1_YEAST	TWF1_YEAST	ARPC5_YEAST
biological_process	GO:0000819	sister chromatid segregation	0	1	0	0.999764	0.000469006	1	0.294
biological_process	GO:0051321	meiotic cell cycle	22	65	0.338462	0.999693	0.000504738	1	0.328	NKP1_YEAST	RIM4_YEAST	MDS3_YEAST	CDC4_YEAST	GAC1_YEAST	SPO22_YEAST	PACC_YEAST	SET3_YEAST	SSN3_YEAST	SPC97_YEAST	PDS5_YEAST	TOF1_YEAST	VPS1_YEAST	MCK1_YEAST	RAD50_YEAST	IDS2_YEAST	NPR3_YEAST	MPC70_YEAST	NDT80_YEAST	KAR3_YEAST	IME1_YEAST	DDC1_YEAST
biological_process	GO:0051726	regulation of cell cycle	3	19	0.157895	0.999687	0.000525222	1	0.332	HSL1_YEAST	NOT1_YEAST	RAD9_YEAST
biological_process	GO:0008104	protein localization	3	14	0.214286	0.99962	0.000530844	1	0.336	EXO84_YEAST	PUF4_YEAST	RAD53_YEAST
biological_process	GO:0032392	DNA geometric change	2	2	1	0.999871	0.000530472	1	0.336	RDH54_YEAST	RAD54_YEAST
biological_process	GO:1901987	regulation of cell cycle phase transition	0	3	0	0.99971	0.00057451	1	0.341
biological_process	GO:0051170	import into nucleus	0	1	0	0.999746	0.000657996	1	0.349
biological_process	GO:0034504	protein localization to nucleus	0	4	0	0.999713	0.000671575	1	0.359
biological_process	GO:0006260	DNA replication	8	28	0.285714	0.999643	0.000703456	1	0.382	PIF1_YEAST	RIR3_YEAST	RRM3_YEAST	RIR1_YEAST	SLX4_YEAST	TOF1_YEAST	MRC1_YEAST	DPOD_YEAST
biological_process	GO:0036228	protein localization to nuclear inner membrane	6	8	0.75	0.999954	0.000753926	1	0.43	NUP49_YEAST	NU100_YEAST	NUP2_YEAST	NUP57_YEAST	NU145_YEAST	NU170_YEAST
biological_process	GO:0007127	meiosis I	0	3	0	0.999644	0.000807722	1	0.452
biological_process	GO:0045132	meiotic chromosome segregation	5	11	0.454545	0.999672	0.000830089	1	0.457	NUD1_YEAST	CSM2_YEAST	SGS1_YEAST	CSM1_YEAST	AFT1_YEAST
biological_process	GO:0006468	protein phosphorylation	45	138	0.326087	0.999526	0.000832664	1	0.459	MPS1_YEAST	PBS2_YEAST	KCC1_YEAST	HSL1_YEAST	HRR25_YEAST	NNK1_YEAST	KC11_YEAST	KC12_YEAST	KC13_YEAST	ELM1_YEAST	FRK1_YEAST	KIN1_YEAST	KIN2_YEAST	KIN4_YEAST	KIN82_YEAST	PHO80_YEAST	MOB2_YEAST	PRK1_YEAST	CHK1_YEAST	SCH9_YEAST	SIP1_YEAST	PDK1_YEAST	SSN3_YEAST	SNF1_YEAST	SPS1_YEAST	SDS24_YEAST	SSK2_YEAST	YP150_YEAST	TDA1_YEAST	YGK3_YEAST	YAK1_YEAST	MCK1_YEAST	RAD53_YEAST	AAKG_YEAST	ATG1_YEAST	BUB1_YEAST	NPR1_YEAST	CDC15_YEAST	CBK1_YEAST	CLA4_YEAST
biological_process	GO:0051028	mRNA transport	12	32	0.375	0.999562	0.00097894	1	0.474	PML39_YEAST	TOM1_YEAST	PO152_YEAST	IMB5_YEAST	IMB1_YEAST	IMB4_YEAST	NUP57_YEAST	POM34_YEAST	SHE3_YEAST	NU170_YEAST	APQ12_YEAST	DHH1_YEAST
biological_process	GO:0000070	mitotic sister chromatid segregation	9	26	0.346154	0.999503	0.00099392	1	0.477	KIP1_YEAST	KIP3_YEAST	DSN1_YEAST	SGS1_YEAST	SMC2_YEAST	SMC4_YEAST	MCK1_YEAST	DYHC_YEAST	CND1_YEAST
biological_process	GO:0045930	negative regulation of mitotic cell cycle	0	1	0	0.999564	0.00104015	1	0.492
biological_process	GO:0001927	exocyst assembly	4	4	1	1	0.0011307	1	0.636	SEC3_YEAST	EXO84_YEAST	EXO70_YEAST	SEC5_YEAST
biological_process	GO:0006999	nuclear pore organization	7	14	0.5	0.99975	0.00128616	1	0.678	PO152_YEAST	LNP_YEAST	NUP49_YEAST	NU116_YEAST	NUP57_YEAST	POM34_YEAST	NUP59_YEAST
biological_process	GO:0032508	DNA duplex unwinding	9	13	0.692308	0.999651	0.00134456	1	0.692	RDH54_YEAST	PIF1_YEAST	HRQ1_YEAST	SGS1_YEAST	SRS2_YEAST	RRM3_YEAST	RAD50_YEAST	INO80_YEAST	CHL1_YEAST
biological_process	GO:0000725	recombinational repair	6	16	0.375	0.999328	0.00149898	1	0.705	SMC5_YEAST	MMS1_YEAST	MMS22_YEAST	CSM2_YEAST	SRS2_YEAST	DDC1_YEAST
biological_process	GO:0060627	regulation of vesicle-mediated transport	1	3	0.333333	0.99945	0.00150199	1	0.707	KEL1_YEAST
biological_process	GO:0007010	cytoskeleton organization	2	13	0.153846	0.998868	0.00183449	1	0.742	SYP1_YEAST	BBC1_YEAST
biological_process	GO:0060963	positive regulation of ribosomal protein gene transcription by RNA polymerase II	6	9	0.666667	0.999824	0.00191033	1	0.771	FHL1_YEAST	SCH9_YEAST	HOT1_YEAST	MSN1_YEAST	GCR1_YEAST	GCR2_YEAST
biological_process	GO:0048278	vesicle docking	4	13	0.307692	0.99947	0.00193251	1	0.773	PEP12_YEAST	STX8_YEAST	SED5_YEAST	VPS33_YEAST
biological_process	GO:0007346	regulation of mitotic cell cycle	2	7	0.285714	0.998947	0.00199656	1	0.776	SMI1_YEAST	SIS2_YEAST
biological_process	GO:0016070	RNA metabolic process	0	6	0	0.998441	0.00201335	1	0.776
biological_process	GO:0007163	establishment or maintenance of cell polarity	3	10	0.3	0.998923	0.00220234	1	0.783	BUD2_YEAST	MOB2_YEAST	CBK1_YEAST
biological_process	GO:0000729	DNA double-strand break processing	5	8	0.625	0.999691	0.00230554	1	0.825	RIF1_YEAST	DNA2_YEAST	COM1_YEAST	SGS1_YEAST	EXO1_YEAST
biological_process	GO:0007120	axial cellular bud site selection	8	15	0.533333	0.999605	0.00237591	1	0.842	RSR1_YEAST	BUD4_YEAST	BUD2_YEAST	PAN1_YEAST	NIS1_YEAST	RAX2_YEAST	BUD3_YEAST	AXL2_YEAST
biological_process	GO:0043937	regulation of sporulation	2	3	0.666667	0.999605	0.00237591	1	0.842	PTP3_YEAST	PTP2_YEAST
biological_process	GO:0051123	RNA polymerase II preinitiation complex assembly	18	46	0.391304	0.999059	0.00244021	1	0.845	TAF5_YEAST	TAF6_YEAST	TAF8_YEAST	TAF9_YEAST	T2AG_YEAST	MED2_YEAST	MED1_YEAST	MED8_YEAST	DAL81_YEAST	MED5_YEAST	MED14_YEAST	TAF12_YEAST	TAF1_YEAST	TAF10_YEAST	MED11_YEAST	TAF11_YEAST	HOT1_YEAST	MED16_YEAST
biological_process	GO:0000282	cellular bud site selection	7	15	0.466667	0.999202	0.00249672	1	0.848	CHS5_YEAST	HKR1_YEAST	MSB2_YEAST	RAX2_YEAST	BUD8_YEAST	AFI1_YEAST	CDC24_YEAST
biological_process	GO:0000724	double-strand break repair via homologous recombination	11	33	0.333333	0.998722	0.00284395	1	0.862	SMC5_YEAST	RDH54_YEAST	SNF5_YEAST	RSC2_YEAST	MMS22_YEAST	CTF18_YEAST	NSE2_YEAST	SGS1_YEAST	RAD1_YEAST	RAD51_YEAST	DUF1_YEAST
biological_process	GO:0007532	regulation of mating-type specific transcription, DNA-templated	2	3	0.666667	0.999777	0.00312455	1	0.899	HMAL1_YEAST	MTAL1_YEAST
biological_process	GO:2000369	regulation of clathrin-dependent endocytosis	1	1	1	0.999777	0.00312455	1	0.899	ARK1_YEAST
biological_process	GO:0045184	establishment of protein localization	2	8	0.25	0.997444	0.00350233	1	0.923	RSR1_YEAST	NIS1_YEAST
biological_process	GO:0015031	protein transport	42	153	0.27451	0.997104	0.00397506	1	0.939	TIP20_YEAST	SDA1_YEAST	SBE22_YEAST	SEC16_YEAST	SEC3_YEAST	GYL1_YEAST	INP53_YEAST	BRE4_YEAST	CHS5_YEAST	EXO84_YEAST	EXO70_YEAST	LDB19_YEAST	GTR2_YEAST	INP51_YEAST	NMD3_YEAST	SUS1_YEAST	SBE2_YEAST	SEC8_YEAST	SEC5_YEAST	SEC9_YEAST	SEC7_YEAST	VID22_YEAST	OPT1_YEAST	LST4_YEAST	SEC39_YEAST	VPS41_YEAST	VPS38_YEAST	VPS60_YEAST	MSO1_YEAST	WDR59_YEAST	VTS1_YEAST	UFE1_YEAST	VAC14_YEAST	RAV1_YEAST	NPR2_YEAST	NPR3_YEAST	GLO3_YEAST	INP52_YEAST	GFD1_YEAST	GGPPS_YEAST
biological_process	GO:0099022	vesicle tethering	3	8	0.375	0.999243	0.00399501	1	0.946	VPS41_YEAST	VPS33_YEAST	VPS8_YEAST
biological_process	GO:0045892	negative regulation of transcription, DNA-templated	5	9	0.555556	0.997434	0.00404446	1	0.957	MOT1_YEAST	CYC8_YEAST	SAS2_YEAST	SAS3_YEAST	EAF3_YEAST
biological_process	GO:0048309	endoplasmic reticulum inheritance	7	13	0.538462	0.999327	0.00420979	1	0.963	RTN1_YEAST	RTN2_YEAST	SEC3_YEAST	SHE3_YEAST	SEY1_YEAST	SEC8_YEAST	SEC5_YEAST
biological_process	GO:2000785	regulation of autophagosome assembly	3	4	0.75	0.999327	0.00420979	1	0.963	HRR25_YEAST	NPR2_YEAST	NPR3_YEAST
biological_process	GO:0030010	establishment of cell polarity	7	27	0.259259	0.998014	0.00448583	1	0.966	SLG1_YEAST	ROM2_YEAST	HKR1_YEAST	MSB2_YEAST	ZDS1_YEAST	BEM4_YEAST	CDC24_YEAST
biological_process	GO:0080135	regulation of cellular response to stress	0	2	0	0.997559	0.00540821	1	0.986
biological_process	GO:0016573	histone acetylation	16	54	0.296296	0.997523	0.0057048	1	0.988	SPT7_YEAST	TAF5_YEAST	TAF6_YEAST	TAF9_YEAST	EPL1_YEAST	SGF73_YEAST	SAS4_YEAST	SWC4_YEAST	SPT3_YEAST	SUS1_YEAST	SAS2_YEAST	SAS3_YEAST	TAF12_YEAST	TAF10_YEAST	CHD1_YEAST	EAF3_YEAST
biological_process	GO:0006997	nucleus organization	1	4	0.25	0.997534	0.00556628	1	0.988	TOM1_YEAST
biological_process	GO:0030100	regulation of endocytosis	0	4	0	0.998427	0.00555762	1	0.988
biological_process	GO:0090329	regulation of DNA-dependent DNA replication	0	1	0	0.997697	0.00591995	1	0.989
biological_process	GO:0071400	cellular response to oleic acid	3	3	1	1	0.00617406	1	0.997	RTG1_YEAST	RTG3_YEAST	ACA2_YEAST
biological_process	GO:0031954	positive regulation of protein autophosphorylation	3	3	1	1	0.00617406	1	0.997	ELM1_YEAST	SSP2_YEAST	SSK1_YEAST
biological_process	GO:0031860	telomeric 3' overhang formation	3	3	1	1	0.00617406	1	0.997	COM1_YEAST	SGS1_YEAST	EXO1_YEAST
biological_process	GO:0010811	positive regulation of cell-substrate adhesion	2	2	1	1	0.00617406	1	0.997	WHI3_YEAST	YAK1_YEAST
biological_process	GO:0045895	positive regulation of mating-type specific transcription, DNA-templated	1	1	1	1	0.00617406	1	0.997	HMAL1_YEAST
biological_process	GO:0045806	negative regulation of endocytosis	1	1	1	1	0.00617406	1	0.997	NPR1_YEAST
biological_process	GO:0006891	intra-Golgi vesicle-mediated transport	12	31	0.387097	0.997283	0.00834412	1	0.999	COG4_YEAST	COG6_YEAST	CASP_YEAST	COPG_YEAST	SEC18_YEAST	SED5_YEAST	TRS65_YEAST	SEC7_YEAST	COG5_YEAST	COG2_YEAST	COG1_YEAST	AGE2_YEAST
biological_process	GO:0006378	mRNA polyadenylation	10	24	0.416667	0.997287	0.00940509	1	0.999	SEN1_YEAST	HRP1_YEAST	MPE1_YEAST	FIR1_YEAST	PTI1_YEAST	PCF11_YEAST	RNA14_YEAST	YSH1_YEAST	CFT2_YEAST	NAB2_YEAST
biological_process	GO:0031578	mitotic spindle orientation checkpoint signaling	7	14	0.5	0.998681	0.00710009	1	0.999	BUD2_YEAST	BUB2_YEAST	BIM1_YEAST	KIN4_YEAST	SPC72_YEAST	AMN1_YEAST	2A5D_YEAST
biological_process	GO:0090522	vesicle tethering involved in exocytosis	5	8	0.625	0.999246	0.00707558	1	0.999	SEC3_YEAST	EXO84_YEAST	EXO70_YEAST	SEC8_YEAST	SEC5_YEAST
biological_process	GO:0090110	COPII-coated vesicle cargo loading	4	6	0.666667	0.998948	0.0123733	1	0.999	SFB2_YEAST	SFB3_YEAST	SEC31_YEAST	NEL1_YEAST
biological_process	GO:0016233	telomere capping	3	6	0.5	0.998859	0.00751197	1	0.999	RIF1_YEAST	CDC13_YEAST	DPOA2_YEAST
biological_process	GO:0001100	negative regulation of exit from mitosis	3	10	0.3	0.996843	0.0115009	1	0.999	KEL1_YEAST	AMN1_YEAST	2ABA_YEAST
biological_process	GO:0000972	transcription-dependent tethering of RNA polymerase II gene DNA at nuclear periphery	3	11	0.272727	0.996843	0.0115009	1	0.999	NUP1_YEAST	NUP2_YEAST	NU170_YEAST
biological_process	GO:0061025	membrane fusion	3	6	0.5	0.996931	0.00724049	1	0.999	MGM1_YEAST	MSO1_YEAST	USO1_YEAST
biological_process	GO:0007019	microtubule depolymerization	3	4	0.75	0.999246	0.00707558	1	0.999	BIM1_YEAST	KIP1_YEAST	KIP3_YEAST
biological_process	GO:0016310	phosphorylation	2	8	0.25	0.992535	0.0112148	1	0.999	LCB4_YEAST	ATM_YEAST
biological_process	GO:0070192	chromosome organization involved in meiotic cell cycle	2	3	0.666667	0.997148	0.00738247	1	0.999	RAD50_YEAST	RAD51_YEAST
biological_process	GO:0030029	actin filament-based process	2	2	1	0.993524	0.0109834	1	0.999	SAC3_YEAST	VPS52_YEAST
biological_process	GO:0007533	mating type switching	2	7	0.285714	0.996843	0.0115009	1	0.999	SHE3_YEAST	ULS1_YEAST
biological_process	GO:0032106	positive regulation of response to extracellular stimulus	2	2	1	0.998681	0.00710009	1	0.999	WHI3_YEAST	YAK1_YEAST
biological_process	GO:2000104	negative regulation of DNA-dependent DNA replication	1	1	1	0.998681	0.00710009	1	0.999	CHD1_YEAST
biological_process	GO:0035825	homologous recombination	1	1	1	0.995514	0.00955596	1	0.999	NEJ1_YEAST
biological_process	GO:0018394	peptidyl-lysine acetylation	0	2	0	0.996936	0.00691037	1	0.999
biological_process	GO:0009991	response to extracellular stimulus	0	1	0	0.994263	0.00981258	1	0.999
biological_process	GO:0006903	vesicle targeting	0	1	0	0.996721	0.0103459	1	0.999
biological_process	GO:0033365	protein localization to organelle	0	1	0	0.992828	0.00992018	1	0.999
biological_process	GO:0018393	internal peptidyl-lysine acetylation	0	1	0	0.996936	0.00691037	1	0.999
biological_process	GO:0031505	fungal-type cell wall organization	31	135	0.22963	0.81434	0.237974	1	1	PIR5_YEAST	SLG1_YEAST	SBE22_YEAST	GPI14_YEAST	IRS4_YEAST	CHS1_YEAST	HKR1_YEAST	PIR3_YEAST	CRH2_YEAST	NCW2_YEAST	SBE2_YEAST	PIR1_YEAST	TAX4_YEAST	TCO89_YEAST	EXG2_YEAST	TSC11_YEAST	YKS7_YEAST	WSC2_YEAST	MSB2_YEAST	YL413_YEAST	YPS3_YEAST	ZRG8_YEAST	BIT61_YEAST	BAR1_YEAST	HRD1_YEAST	KPR5_YEAST	MYO5_YEAST	HS150_YEAST	KIC1_YEAST	HPF1_YEAST	DAN4_YEAST
biological_process	GO:0000122	negative regulation of transcription by RNA polymerase II	30	118	0.254237	0.972015	0.0435726	1	1	SFL1_YEAST	RFX1_YEAST	ACE2_YEAST	MED2_YEAST	MED1_YEAST	MED8_YEAST	IXR1_YEAST	CYC8_YEAST	CBF1_YEAST	CUP9_YEAST	PHO80_YEAST	MIG1_YEAST	LEUR_YEAST	MED14_YEAST	SET1_YEAST	SWC4_YEAST	SKO1_YEAST	PACC_YEAST	RGT1_YEAST	SSN3_YEAST	MFG1_YEAST	MED11_YEAST	UME6_YEAST	RAD23_YEAST	MCM1_YEAST	GIS1_YEAST	MED16_YEAST	AFT1_YEAST	CLA4_YEAST	GCR2_YEAST
biological_process	GO:0006338	chromatin remodeling	23	91	0.252747	0.94574	0.0764058	1	1	SNF5_YEAST	RSC2_YEAST	RSC3_YEAST	RSC4_YEAST	SNF12_YEAST	SNF2_YEAST	SWI1_YEAST	FUN19_YEAST	CYC8_YEAST	FKH2_YEAST	CBF1_YEAST	ECM5_YEAST	SWC4_YEAST	MRN1_YEAST	TTI1_YEAST	YO338_YEAST	UME6_YEAST	RAD54_YEAST	ARP5_YEAST	ARP9_YEAST	CHD1_YEAST	INO80_YEAST	GIS1_YEAST
biological_process	GO:0006886	intracellular protein transport	21	98	0.214286	0.939552	0.0766683	1	1	PEP12_YEAST	PEP8_YEAST	BUB2_YEAST	MSB4_YEAST	GOSR1_YEAST	COPG_YEAST	SFB2_YEAST	SNX4_YEAST	PIR1_YEAST	SFB3_YEAST	STX8_YEAST	SEC31_YEAST	SED5_YEAST	VPS45_YEAST	VPS17_YEAST	VPS33_YEAST	USO1_YEAST	VPS35_YEAST	NEL1_YEAST	BET1_YEAST	CLH_YEAST
biological_process	GO:0006511	ubiquitin-dependent protein catabolic process	19	96	0.197917	0.430997	0.634954	1	1	TOM1_YEAST	DIA2_YEAST	MPE1_YEAST	CDC4_YEAST	CUE5_YEAST	BSD2_YEAST	DEF1_YEAST	UBP7_YEAST	RMD5_YEAST	UMP1_YEAST	UBA1_YEAST	UBP5_YEAST	YBR2_YEAST	UFO1_YEAST	YL352_YEAST	RAD16_YEAST	HRD1_YEAST	LTN1_YEAST	BRO1_YEAST
biological_process	GO:0071555	cell wall organization	18	53	0.339623	0.987833	0.0181275	1	1	RDS2_YEAST	SHC1_YEAST	CHIT_YEAST	FIG2_YEAST	GTO2_YEAST	ECM5_YEAST	GPI13_YEAST	SCW4_YEAST	SMI1_YEAST	SLA1_YEAST	PAN1_YEAST	TRS65_YEAST	SCW10_YEAST	SCW11_YEAST	WSC4_YEAST	ZDS1_YEAST	FKS1_YEAST	DSE2_YEAST
biological_process	GO:0006623	protein targeting to vacuole	18	60	0.3	0.987022	0.0227938	1	1	BECN1_YEAST	AP3D_YEAST	BSD2_YEAST	SNX4_YEAST	SPL2_YEAST	VPS45_YEAST	VPS64_YEAST	VPS41_YEAST	VPS33_YEAST	VPS52_YEAST	VPS25_YEAST	VPS28_YEAST	VPS13_YEAST	VPS10_YEAST	VPS8_YEAST	VPS1_YEAST	YPP1_YEAST	VPS36_YEAST
biological_process	GO:0016567	protein ubiquitination	18	80	0.225	0.49072	0.597111	1	1	SKP2_YEAST	TOM1_YEAST	DIA2_YEAST	MPE1_YEAST	CDC27_YEAST	CDC4_YEAST	LEE1_YEAST	PIB1_YEAST	HRD3_YEAST	DEF1_YEAST	UBA1_YEAST	UBR1_YEAST	UFO1_YEAST	YL352_YEAST	RAD16_YEAST	ACL4_YEAST	LTN1_YEAST	DSC3_YEAST
biological_process	GO:0031509	subtelomeric heterochromatin assembly	16	63	0.253968	0.942015	0.101977	1	1	DIA2_YEAST	HST3_YEAST	NUP2_YEAST	NUP84_YEAST	SIR3_YEAST	SIR4_YEAST	SET1_YEAST	SAS4_YEAST	SAS2_YEAST	SAS3_YEAST	SWD3_YEAST	YP216_YEAST	INO80_YEAST	NU145_YEAST	MRC1_YEAST	LTN1_YEAST
biological_process	GO:0006364	rRNA processing	16	108	0.148148	0.00135864	0.999251	0.332	1	SEN1_YEAST	MOT1_YEAST	IPI1_YEAST	ERB1_YEAST	DPO5_YEAST	ESF1_YEAST	PRP43_YEAST	DBP3_YEAST	RIX1_YEAST	SSF2_YEAST	UTP21_YEAST	CBT1_YEAST	NAF1_YEAST	MDN1_YEAST	DRS1_YEAST	DBP10_YEAST
biological_process	GO:0006325	chromatin organization	16	64	0.25	0.97072	0.0398301	1	1	SPT7_YEAST	TAF5_YEAST	TAF6_YEAST	TAF9_YEAST	SGF73_YEAST	SIF2_YEAST	SPT3_YEAST	SUS1_YEAST	SET3_YEAST	TAF12_YEAST	RXT3_YEAST	TAF1_YEAST	TAF10_YEAST	ARP9_YEAST	LTN1_YEAST	ATM_YEAST
biological_process	GO:0007131	reciprocal meiotic recombination	15	51	0.294118	0.978669	0.0412855	1	1	MLH3_YEAST	MSC1_YEAST	RE107_YEAST	RE114_YEAST	RDH54_YEAST	MSC3_YEAST	RIM4_YEAST	MMS4_YEAST	MSH3_YEAST	MLH1_YEAST	SKI8_YEAST	ZIP1_YEAST	RAD51_YEAST	RAD54_YEAST	MSH5_YEAST
biological_process	GO:0000723	telomere maintenance	15	43	0.348837	0.982824	0.0319114	1	1	PIF1_YEAST	RIF1_YEAST	CDC13_YEAST	DNA2_YEAST	COM1_YEAST	DEF1_YEAST	PBP2_YEAST	SGS1_YEAST	SET1_YEAST	RRM3_YEAST	SWD3_YEAST	RAD50_YEAST	MRC1_YEAST	ATM_YEAST	EXO1_YEAST
biological_process	GO:0006887	exocytosis	15	42	0.357143	0.990838	0.0205836	1	1	SEC3_YEAST	GYL1_YEAST	MSB4_YEAST	EXO84_YEAST	KIN1_YEAST	KIN2_YEAST	EXO70_YEAST	KES1_YEAST	OSH2_YEAST	SEC8_YEAST	SEC5_YEAST	STX8_YEAST	SEC9_YEAST	MYO5_YEAST	HES1_YEAST
biological_process	GO:0016236	macroautophagy	14	72	0.194444	0.970023	0.0466925	1	1	PEP12_YEAST	SEC16_YEAST	COG4_YEAST	BECN1_YEAST	SEC18_YEAST	VPS41_YEAST	VPS38_YEAST	VPS36_YEAST	ATG13_YEAST	ATG1_YEAST	BUB1_YEAST	NAA35_YEAST	NACB1_YEAST	COG2_YEAST
biological_process	GO:0007124	pseudohyphal growth	14	51	0.27451	0.927238	0.120201	1	1	SOK2_YEAST	MDS3_YEAST	GPA2_YEAST	ELM1_YEAST	PAM1_YEAST	NOT1_YEAST	SPT3_YEAST	MGA1_YEAST	WHI3_YEAST	UME6_YEAST	NPR3_YEAST	IME1_YEAST	BUD8_YEAST	DSE2_YEAST
biological_process	GO:0006368	transcription elongation from RNA polymerase II promoter	13	76	0.171053	0.549677	0.541252	1	1	RSC2_YEAST	RSC30_YEAST	RSC3_YEAST	RSC4_YEAST	HPR1_YEAST	NOT1_YEAST	SUS1_YEAST	RPB1_YEAST	THO2_YEAST	TEA1_YEAST	ARP9_YEAST	CHD1_YEAST	EAF3_YEAST
biological_process	GO:0032258	cytoplasm to vacuole transport by the Cvt pathway	13	48	0.270833	0.98348	0.0344401	1	1	PEP12_YEAST	COG4_YEAST	BECN1_YEAST	ATG11_YEAST	COG6_YEAST	SNX4_YEAST	COG5_YEAST	VPS45_YEAST	VPS41_YEAST	VPS36_YEAST	ATG1_YEAST	COG2_YEAST	COG1_YEAST
biological_process	GO:0030466	silent mating-type cassette heterochromatin assembly	13	46	0.282609	0.889898	0.181546	1	1	RIF1_YEAST	DIA2_YEAST	MGA2_YEAST	NUP2_YEAST	NUP84_YEAST	SIR1_YEAST	SIR3_YEAST	SIR4_YEAST	SET1_YEAST	SAS2_YEAST	SAS3_YEAST	MRC1_YEAST	CND1_YEAST
biological_process	GO:0006888	endoplasmic reticulum to Golgi vesicle-mediated transport	13	86	0.151163	0.781719	0.299171	1	1	GYL1_YEAST	BUG1_YEAST	GOSR1_YEAST	COPG_YEAST	SMY2_YEAST	SED5_YEAST	SEC7_YEAST	USO1_YEAST	UIP5_YEAST	COG2_YEAST	GLO3_YEAST	BET1_YEAST	AGE2_YEAST
biological_process	GO:0032968	positive regulation of transcription elongation from RNA polymerase II promoter	13	68	0.191176	0.614043	0.508144	1	1	MED2_YEAST	MED1_YEAST	MED8_YEAST	FKH2_YEAST	PFD5_YEAST	NOT1_YEAST	CET1_YEAST	CF130_YEAST	MED5_YEAST	MED14_YEAST	MED11_YEAST	MED16_YEAST	EAF3_YEAST
biological_process	GO:0055085	transmembrane transport	12	96	0.125	1.45367e-07	1	0	1	ALR2_YEAST	SGE1_YEAST	STE6_YEAST	STL1_YEAST	YB8B_YEAST	YO365_YEAST	YMC2_YEAST	YBT1_YEAST	YNJ5_YEAST	ATU1_YEAST	BPT1_YEAST	DTR1_YEAST
biological_process	GO:0007064	mitotic sister chromatid cohesion	11	30	0.366667	0.972481	0.0595984	1	1	CTF4_YEAST	BIM1_YEAST	CTF18_YEAST	SCC3_YEAST	PDS5_YEAST	TOF1_YEAST	VIK1_YEAST	KAR3_YEAST	MRC1_YEAST	DPOE_YEAST	CHL1_YEAST
biological_process	GO:0000002	mitochondrial genome maintenance	11	41	0.268293	0.912134	0.156705	1	1	PIF1_YEAST	ABF2_YEAST	MHR1_YEAST	DML1_YEAST	EXO5_YEAST	MDM34_YEAST	MDV1_YEAST	RRM3_YEAST	MGM1_YEAST	THI4_YEAST	MSH1_YEAST
biological_process	GO:0007015	actin filament organization	11	39	0.282051	0.958813	0.0703238	1	1	PBS2_YEAST	ENT1_YEAST	LAS17_YEAST	ENT2_YEAST	PRK1_YEAST	TWF1_YEAST	BOB1_YEAST	MYO5_YEAST	ARK1_YEAST	BOI2_YEAST	AKL1_YEAST
biological_process	GO:0006406	mRNA export from nucleus	11	32	0.34375	0.987674	0.0249712	1	1	HPR1_YEAST	NUP85_YEAST	NU116_YEAST	NU100_YEAST	NUP84_YEAST	SGF73_YEAST	SAC3_YEAST	NUP82_YEAST	THO2_YEAST	ZDS1_YEAST	GFD1_YEAST
biological_process	GO:0034727	piecemeal microautophagy of the nucleus	11	41	0.268293	0.940402	0.116924	1	1	BECN1_YEAST	HSV2_YEAST	ATG11_YEAST	KES1_YEAST	SNX4_YEAST	OSH2_YEAST	VPS41_YEAST	VPS33_YEAST	ATG13_YEAST	ATG1_YEAST	HES1_YEAST
biological_process	GO:0006914	autophagy	10	45	0.222222	0.966314	0.0482965	1	1	TIP20_YEAST	BECN1_YEAST	ATG11_YEAST	IRS4_YEAST	CUE5_YEAST	SNX4_YEAST	TAX4_YEAST	AAKG_YEAST	ATG13_YEAST	ATG1_YEAST
biological_process	GO:0000398	mRNA splicing, via spliceosome	10	86	0.116279	0.12874	0.918271	1	1	SNU56_YEAST	RIM4_YEAST	MUD2_YEAST	CWC22_YEAST	RU1A_YEAST	MRN1_YEAST	SYF2_YEAST	USA1_YEAST	PRP16_YEAST	PRP4_YEAST
biological_process	GO:0006470	protein dephosphorylation	9	43	0.209302	0.591616	0.530896	1	1	PDP1_YEAST	PTP3_YEAST	PSR1_YEAST	PPS1_YEAST	PTP2_YEAST	PP2C3_YEAST	2A5D_YEAST	2AAA_YEAST	2ABA_YEAST
biological_process	GO:0007005	mitochondrion organization	9	41	0.219512	0.0366309	0.974887	1	1	HCM1_YEAST	MDM34_YEAST	MDM36_YEAST	NGR1_YEAST	PUF3_YEAST	MGM1_YEAST	VPS13_YEAST	ZIM17_YEAST	MSH1_YEAST
biological_process	GO:0030435	sporulation resulting in formation of a cellular spore	9	51	0.176471	0.443254	0.636508	1	1	RSC2_YEAST	SS100_YEAST	RIM4_YEAST	MDS3_YEAST	CDC4_YEAST	SPO22_YEAST	SEF1_YEAST	TGL4_YEAST	IME1_YEAST
biological_process	GO:0032543	mitochondrial translation	9	102	0.0882353	0.00530301	0.997622	0.793	1	SYRM_YEAST	RTPT_YEAST	RT09_YEAST	SLS1_YEAST	SYKM_YEAST	MHR1_YEAST	NAM9_YEAST	RM06_YEAST	GATB_YEAST
biological_process	GO:0060261	positive regulation of transcription initiation from RNA polymerase II promoter	9	28	0.321429	0.937003	0.1263	1	1	T2AG_YEAST	DCP2_YEAST	MED2_YEAST	MED1_YEAST	MED8_YEAST	MED5_YEAST	MED14_YEAST	MED11_YEAST	MED16_YEAST
biological_process	GO:0006270	DNA replication initiation	9	32	0.28125	0.950156	0.0932286	1	1	RIF1_YEAST	CTF4_YEAST	CTF18_YEAST	MCM4_YEAST	RAD53_YEAST	KAD2_YEAST	MCM6_YEAST	DPOA2_YEAST	CDC45_YEAST
biological_process	GO:0042273	ribosomal large subunit biogenesis	9	53	0.169811	0.458867	0.634747	1	1	SYO1_YEAST	SDA1_YEAST	MAK21_YEAST	HRR25_YEAST	ERB1_YEAST	IF4F1_YEAST	PRP43_YEAST	ALB1_YEAST	ACL4_YEAST
biological_process	GO:0030437	ascospore formation	9	52	0.173077	0.503671	0.594422	1	1	SHC1_YEAST	GPA2_YEAST	SET1_YEAST	PACC_YEAST	SSP2_YEAST	SPS1_YEAST	PMD1_YEAST	YO338_YEAST	MCK1_YEAST
biological_process	GO:0006303	double-strand break repair via nonhomologous end joining	9	28	0.321429	0.985803	0.0355235	1	1	RSC2_YEAST	RSC30_YEAST	SIR3_YEAST	SIR4_YEAST	SRS2_YEAST	MCK1_YEAST	RAD50_YEAST	NEJ1_YEAST	DPOE_YEAST
biological_process	GO:0008361	regulation of cell size	9	27	0.333333	0.97766	0.0568604	1	1	TOM1_YEAST	HXKB_YEAST	KA122_YEAST	GPA2_YEAST	SCH9_YEAST	YCV1_YEAST	WHI4_YEAST	WHI3_YEAST	FKS1_YEAST
biological_process	GO:0007094	mitotic spindle assembly checkpoint signaling	8	24	0.333333	0.963867	0.0838775	1	1	MPS1_YEAST	SP105_YEAST	CDC20_YEAST	GAC1_YEAST	MAD1_YEAST	BUB1_YEAST	AMN1_YEAST	2AAA_YEAST
biological_process	GO:0009060	aerobic respiration	8	47	0.170213	0.0211629	0.990291	0.999	1	SLS1_YEAST	NCA2_YEAST	FABG_YEAST	ADT1_YEAST	PUF3_YEAST	RMD9L_YEAST	JAC1_YEAST	GDS1_YEAST
biological_process	GO:0005975	carbohydrate metabolic process	8	36	0.222222	0.115612	0.914476	1	1	MIG1_YEAST	CRH2_YEAST	SCW4_YEAST	SCW10_YEAST	SNF1_YEAST	MNL2_YEAST	SCW11_YEAST	AAKG_YEAST
biological_process	GO:0006896	Golgi to vacuole transport	8	30	0.266667	0.916122	0.171025	1	1	PEP12_YEAST	AP3D_YEAST	STX8_YEAST	VPS45_YEAST	VPS33_YEAST	VPS52_YEAST	VPS10_YEAST	GGA2_YEAST
biological_process	GO:0042147	retrograde transport, endosome to Golgi	8	34	0.235294	0.580911	0.573924	1	1	PEP8_YEAST	BECN1_YEAST	SNX4_YEAST	VPS17_YEAST	VPS52_YEAST	VPS35_YEAST	BOB1_YEAST	BOI2_YEAST
biological_process	GO:0034599	cellular response to oxidative stress	8	88	0.0909091	0.0227102	0.988849	0.999	1	HCM1_YEAST	KCC1_YEAST	GLRX4_YEAST	IRA2_YEAST	MHR1_YEAST	ECM5_YEAST	GRE3_YEAST	TDA1_YEAST
biological_process	GO:0016973	poly(A)+ mRNA export from nucleus	8	37	0.216216	0.772864	0.366531	1	1	NUP1_YEAST	NUP49_YEAST	NU116_YEAST	NUP2_YEAST	SUS1_YEAST	PIN4_YEAST	NAB2_YEAST	NU145_YEAST
biological_process	GO:0000727	double-strand break repair via break-induced replication	8	25	0.32	0.971886	0.0723608	1	1	PIF1_YEAST	SLD5_YEAST	CDT1_YEAST	CTF4_YEAST	MCM4_YEAST	SLX4_YEAST	MCM6_YEAST	CDC45_YEAST
biological_process	GO:0043161	proteasome-mediated ubiquitin-dependent protein catabolic process	8	68	0.117647	0.240987	0.819155	1	1	TOM1_YEAST	FYV10_YEAST	PSA1_YEAST	PSB2_YEAST	PSA6_YEAST	UBP14_YEAST	RMD5_YEAST	RAD23_YEAST
biological_process	GO:0000184	nuclear-transcribed mRNA catabolic process, nonsense-mediated decay	8	21	0.380952	0.977262	0.0526535	1	1	DCP2_YEAST	HRP1_YEAST	ESL1_YEAST	NMD2_YEAST	DCP1_YEAST	EBS1_YEAST	ECM32_YEAST	ESL2_YEAST
biological_process	GO:0000027	ribosomal large subunit assembly	8	38	0.210526	0.693683	0.45751	1	1	RSA1_YEAST	MAK21_YEAST	IPI1_YEAST	DPO5_YEAST	RIX1_YEAST	SSF2_YEAST	MDN1_YEAST	DRS1_YEAST
biological_process	GO:0030433	ubiquitin-dependent ERAD pathway	8	45	0.177778	0.468878	0.677512	1	1	DFM1_YEAST	EPS1_YEAST	HRD3_YEAST	USA1_YEAST	MNL2_YEAST	UBR1_YEAST	RAD23_YEAST	HRD1_YEAST
biological_process	GO:0000722	telomere maintenance via recombination	7	32	0.21875	0.778089	0.370848	1	1	PIF1_YEAST	SGS1_YEAST	RAD50_YEAST	RAD51_YEAST	RAD54_YEAST	RAD57_YEAST	INO80_YEAST
biological_process	GO:0000422	autophagy of mitochondrion	7	37	0.189189	0.825054	0.279826	1	1	RTG3_YEAST	HSV2_YEAST	ATG11_YEAST	DCK1_YEAST	SNX4_YEAST	ATG13_YEAST	ATG1_YEAST
biological_process	GO:0098789	pre-mRNA cleavage required for polyadenylation	7	21	0.333333	0.973241	0.0744035	1	1	HRP1_YEAST	MPE1_YEAST	PTI1_YEAST	PCF11_YEAST	RNA14_YEAST	YSH1_YEAST	CFT2_YEAST
biological_process	GO:0032880	regulation of protein localization	7	28	0.25	0.956611	0.0727434	1	1	BNI1_YEAST	EDE1_YEAST	HRR25_YEAST	PHO80_YEAST	SCH9_YEAST	SUS1_YEAST	ZDS1_YEAST
biological_process	GO:0000462	maturation of SSU-rRNA from tricistronic rRNA transcript (SSU-rRNA, 5.8S rRNA, LSU-rRNA)	7	71	0.0985915	0.0403228	0.979077	1	1	UTP8_YEAST	BUD21_YEAST	FAF1_YEAST	PRP43_YEAST	TSR1_YEAST	UTP17_YEAST	BMS1_YEAST
biological_process	GO:0006890	retrograde vesicle-mediated transport, Golgi to endoplasmic reticulum	7	33	0.212121	0.8428	0.27754	1	1	TIP20_YEAST	COPG_YEAST	SEC39_YEAST	UFE1_YEAST	GLO3_YEAST	BET1_YEAST	GET1_YEAST
biological_process	GO:0000472	endonucleolytic cleavage to generate mature 5'-end of SSU-rRNA from (SSU-rRNA, 5.8S rRNA, LSU-rRNA)	7	34	0.205882	0.72246	0.436273	1	1	TOM1_YEAST	BUD21_YEAST	CDC4_YEAST	NOP9_YEAST	UTP18_YEAST	UTP20_YEAST	BMS1_YEAST
biological_process	GO:0043547	positive regulation of GTPase activity	7	26	0.269231	0.958119	0.0874271	1	1	BUB2_YEAST	IRA2_YEAST	GTR2_YEAST	LST4_YEAST	IRA1_YEAST	BUD3_YEAST	BEM4_YEAST
biological_process	GO:0030036	actin cytoskeleton organization	7	27	0.259259	0.985379	0.0236788	1	1	SLG1_YEAST	SDA1_YEAST	GLRX4_YEAST	ENG2_YEAST	VPS1_YEAST	BEM2_YEAST	BBC1_YEAST
biological_process	GO:0016575	histone deacetylation	7	21	0.333333	0.97766	0.0568604	1	1	SNT1_YEAST	HST3_YEAST	SIF2_YEAST	SET3_YEAST	RXT3_YEAST	HOS4_YEAST	EAF3_YEAST
biological_process	GO:0006893	Golgi to plasma membrane transport	7	22	0.318182	0.920792	0.1572	1	1	SEC3_YEAST	CHS5_YEAST	EXO84_YEAST	EXO70_YEAST	SEC8_YEAST	SEC5_YEAST	BCH1_YEAST
biological_process	GO:0043328	protein transport to vacuole involved in ubiquitin-dependent protein catabolic process via the multivesicular body sorting pathway	7	28	0.25	0.873796	0.243973	1	1	LSB1_YEAST	COS9_YEAST	VPS25_YEAST	VPS28_YEAST	VPS36_YEAST	GGA2_YEAST	BRO1_YEAST
biological_process	GO:0000055	ribosomal large subunit export from nucleus	7	32	0.21875	0.750775	0.403593	1	1	SDA1_YEAST	NUP1_YEAST	NUP49_YEAST	NUP85_YEAST	NU116_YEAST	NMD3_YEAST	NUP82_YEAST
biological_process	GO:0000973	posttranscriptional tethering of RNA polymerase II gene DNA at nuclear periphery	7	18	0.388889	0.990383	0.0335214	1	1	NU116_YEAST	NU100_YEAST	NUP2_YEAST	NUP84_YEAST	SAC3_YEAST	SUS1_YEAST	NU145_YEAST
biological_process	GO:0000077	DNA damage checkpoint signaling	7	19	0.368421	0.994572	0.0144256	1	1	CHK1_YEAST	PIN4_YEAST	RAD53_YEAST	RAD9_YEAST	DDC1_YEAST	GCN2_YEAST	ATM_YEAST
biological_process	GO:0016579	protein deubiquitination	7	24	0.291667	0.991656	0.0227402	1	1	BRE5_YEAST	UBP14_YEAST	UBP7_YEAST	UBP5_YEAST	UBP6_YEAST	DUF1_YEAST	BRO1_YEAST
biological_process	GO:0031573	mitotic intra-S DNA damage checkpoint signaling	6	13	0.461538	0.99579	0.0200115	1	1	MMS4_YEAST	SGS1_YEAST	RAD9_YEAST	MRC1_YEAST	DPOE_YEAST	DDC1_YEAST
biological_process	GO:0030174	regulation of DNA-dependent DNA replication initiation	6	20	0.3	0.954236	0.106392	1	1	CDT1_YEAST	IPI1_YEAST	MCM4_YEAST	RIX1_YEAST	MCM6_YEAST	EAF3_YEAST
biological_process	GO:0007118	budding cell apical bud growth	6	20	0.3	0.925597	0.173562	1	1	BNI1_YEAST	MOB2_YEAST	BOB1_YEAST	KIC1_YEAST	CBK1_YEAST	BOI2_YEAST
biological_process	GO:0006906	vesicle fusion	6	23	0.26087	0.99416	0.0142986	1	1	PEP12_YEAST	GOSR1_YEAST	STX8_YEAST	SED5_YEAST	SEC9_YEAST	BET1_YEAST
biological_process	GO:0042144	vacuole fusion, non-autophagic	6	34	0.176471	0.426076	0.722604	1	1	IVY1_YEAST	PHO80_YEAST	SEC18_YEAST	VPS41_YEAST	VPS33_YEAST	BPT1_YEAST
biological_process	GO:0045053	protein retention in Golgi apparatus	6	15	0.4	0.988766	0.0420026	1	1	PEP8_YEAST	BRE5_YEAST	VPS13_YEAST	VPS35_YEAST	VPS1_YEAST	VPS36_YEAST
biological_process	GO:0006409	tRNA export from nucleus	6	15	0.4	0.975775	0.0750099	1	1	UTP8_YEAST	NUP49_YEAST	CEX1_YEAST	NU116_YEAST	XPOT_YEAST	NU145_YEAST
biological_process	GO:0006913	nucleocytoplasmic transport	6	15	0.4	0.980395	0.0300539	1	1	TOM1_YEAST	PO152_YEAST	NTF2_YEAST	POM34_YEAST	MAD1_YEAST	NU170_YEAST
biological_process	GO:0001403	invasive growth in response to glucose limitation	6	43	0.139535	0.430963	0.703156	1	1	DIA2_YEAST	FIG2_YEAST	GPA2_YEAST	SPT3_YEAST	SNF1_YEAST	WHI3_YEAST
biological_process	GO:0030476	ascospore wall assembly	6	48	0.125	0.195753	0.897844	1	1	CHS5_YEAST	GIP1_YEAST	SSP2_YEAST	SPS1_YEAST	DTR1_YEAST	FKS2_YEAST
biological_process	GO:0045943	positive regulation of transcription by RNA polymerase I	6	22	0.272727	0.725422	0.446349	1	1	UTP8_YEAST	HPR1_YEAST	SCH9_YEAST	RRN9_YEAST	THO2_YEAST	UTP17_YEAST
biological_process	GO:0000480	endonucleolytic cleavage in 5'-ETS of tricistronic rRNA transcript (SSU-rRNA, 5.8S rRNA, LSU-rRNA)	6	33	0.181818	0.596407	0.58157	1	1	TOM1_YEAST	CDC4_YEAST	NOP9_YEAST	UTP18_YEAST	UTP20_YEAST	BMS1_YEAST
biological_process	GO:0006879	cellular iron ion homeostasis	6	44	0.136364	0.341696	0.782823	1	1	FRE1_YEAST	GLRX4_YEAST	HAA1_YEAST	MMT2_YEAST	JAC1_YEAST	CTH2_YEAST
biological_process	GO:0006397	mRNA processing	6	45	0.133333	0.424098	0.645327	1	1	DCP2_YEAST	DCP1_YEAST	PAT1_YEAST	PAN2_YEAST	CBT1_YEAST	DHH1_YEAST
biological_process	GO:0031146	SCF-dependent proteasomal ubiquitin-dependent protein catabolic process	6	20	0.3	0.941478	0.145231	1	1	DIA2_YEAST	CDC4_YEAST	MET30_YEAST	UFO1_YEAST	YL352_YEAST	AMN1_YEAST
biological_process	GO:0006268	DNA unwinding involved in DNA replication	6	18	0.333333	0.966479	0.0957542	1	1	PIF1_YEAST	SLD5_YEAST	MCM4_YEAST	SGS1_YEAST	MCM6_YEAST	CDC45_YEAST
biological_process	GO:0030242	autophagy of peroxisome	6	23	0.26087	0.852215	0.274578	1	1	SLG1_YEAST	COG4_YEAST	BECN1_YEAST	HRR25_YEAST	ATG11_YEAST	COG2_YEAST
biological_process	GO:0016584	nucleosome positioning	6	13	0.461538	0.99579	0.0200115	1	1	RSC3_YEAST	CYC8_YEAST	ARP9_YEAST	CHD1_YEAST	INO80_YEAST	NU170_YEAST
biological_process	GO:0006508	proteolysis	6	28	0.214286	0.39552	0.657978	1	1	TM108_YEAST	NNK1_YEAST	PFF1_YEAST	YGK3_YEAST	DPP3_YEAST	DUG2_YEAST
biological_process	GO:0034063	stress granule assembly	6	14	0.428571	0.9929	0.0296951	1	1	DCP2_YEAST	IF4F1_YEAST	IF4F2_YEAST	BRE5_YEAST	THO2_YEAST	DHH1_YEAST
biological_process	GO:0018107	peptidyl-threonine phosphorylation	6	17	0.352941	0.966479	0.0957542	1	1	PRK1_YEAST	PKH1_YEAST	YAK1_YEAST	CDC15_YEAST	ARK1_YEAST	AKL1_YEAST
biological_process	GO:0030473	nuclear migration along microtubule	6	14	0.428571	0.980354	0.058522	1	1	BIM1_YEAST	KIP2_YEAST	KIP3_YEAST	NUM1_YEAST	DYHC_YEAST	NDE1_YEAST
biological_process	GO:0000045	autophagosome assembly	6	25	0.24	0.9821	0.0400899	1	1	BECN1_YEAST	ATG11_YEAST	SEC18_YEAST	SEC7_YEAST	ATG13_YEAST	ATG1_YEAST
biological_process	GO:0019236	response to pheromone	6	11	0.545455	0.576128	0.531409	1	1	FIG2_YEAST	STE6_YEAST	YPP1_YEAST	RCE1_YEAST	CLA4_YEAST	BEM4_YEAST
biological_process	GO:0000447	endonucleolytic cleavage in ITS1 to separate SSU-rRNA from 5.8S rRNA and LSU-rRNA from tricistronic rRNA transcript (SSU-rRNA, 5.8S rRNA, LSU-rRNA)	5	44	0.113636	0.155918	0.926867	1	1	TOM1_YEAST	BUD21_YEAST	NOP9_YEAST	UTP18_YEAST	UTP20_YEAST
biological_process	GO:0009408	response to heat	5	20	0.25	0.797739	0.29625	1	1	SLG1_YEAST	GAC1_YEAST	WSC4_YEAST	WSC2_YEAST	AP1_YEAST
biological_process	GO:0009086	methionine biosynthetic process	5	23	0.217391	0.41843	0.75095	1	1	MET30_YEAST	MET28_YEAST	MET16_YEAST	MET4_YEAST	MTHR1_YEAST
biological_process	GO:0007121	bipolar cellular bud site selection	5	18	0.277778	0.904246	0.223776	1	1	RSR1_YEAST	BUD2_YEAST	PAN1_YEAST	RAX2_YEAST	MYO5_YEAST
biological_process	GO:0000001	mitochondrion inheritance	5	25	0.2	0.695896	0.496348	1	1	ABF2_YEAST	MDM36_YEAST	NUM1_YEAST	MGM1_YEAST	ARPC5_YEAST
biological_process	GO:0006457	protein folding	5	80	0.0625	0.000938405	0.999678	0.236	1	HCH1_YEAST	ERJ5_YEAST	PFD5_YEAST	ZIM17_YEAST	CIN1_YEAST
biological_process	GO:0000710	meiotic mismatch repair	5	11	0.454545	0.992488	0.0359573	1	1	MLH3_YEAST	MSH3_YEAST	MLH1_YEAST	RAD1_YEAST	MSH5_YEAST
biological_process	GO:0006298	mismatch repair	5	20	0.25	0.941798	0.135527	1	1	MLH3_YEAST	MSH3_YEAST	MLH1_YEAST	MSH1_YEAST	EXO1_YEAST
biological_process	GO:0006289	nucleotide-excision repair	5	33	0.151515	0.925214	0.126753	1	1	DNLI1_YEAST	HRQ1_YEAST	RAD23_YEAST	RAD51_YEAST	RAD9_YEAST
biological_process	GO:0007035	vacuolar acidification	5	29	0.172414	0.553651	0.637251	1	1	NHX1_YEAST	VPS45_YEAST	VMA22_YEAST	RAV1_YEAST	DBF2_YEAST
biological_process	GO:0009651	response to salt stress	5	15	0.333333	0.982901	0.0457644	1	1	PSR1_YEAST	SIS2_YEAST	TCO89_YEAST	MYO5_YEAST	HAL9_YEAST
biological_process	GO:0034501	protein localization to kinetochore	5	11	0.454545	0.992488	0.0359573	1	1	MPS1_YEAST	SP105_YEAST	PLC1_YEAST	BUB1_YEAST	NDC80_YEAST
biological_process	GO:0000288	nuclear-transcribed mRNA catabolic process, deadenylation-dependent decay	5	12	0.416667	0.963676	0.0712517	1	1	JSN1_YEAST	NOT1_YEAST	PUF2_YEAST	PUF3_YEAST	PUF4_YEAST
biological_process	GO:0006267	pre-replicative complex assembly involved in nuclear cell cycle DNA replication	5	19	0.263158	0.880782	0.261118	1	1	CDT1_YEAST	IPI1_YEAST	MCM4_YEAST	RIX1_YEAST	MCM6_YEAST
biological_process	GO:0006369	termination of RNA polymerase II transcription	5	17	0.294118	0.839908	0.304104	1	1	REB1_YEAST	SEN1_YEAST	PCF11_YEAST	YSH1_YEAST	CHD1_YEAST
biological_process	GO:0007130	synaptonemal complex assembly	5	20	0.25	0.925597	0.173562	1	1	SET1_YEAST	SMC2_YEAST	SMC4_YEAST	HOP1_YEAST	CND1_YEAST
biological_process	GO:0007264	small GTPase mediated signal transduction	5	19	0.263158	0.762687	0.337735	1	1	RSR1_YEAST	ROM2_YEAST	DCK1_YEAST	ROM1_YEAST	BEM2_YEAST
biological_process	GO:0000209	protein polyubiquitination	5	36	0.138889	0.255042	0.859332	1	1	TOM1_YEAST	MPE1_YEAST	MET30_YEAST	UBR1_YEAST	BUL2_YEAST
biological_process	GO:0006970	response to osmotic stress	5	22	0.227273	0.987333	0.0243003	1	1	SLG1_YEAST	NAH1_YEAST	MSB2_YEAST	PTPA2_YEAST	MYO5_YEAST
biological_process	GO:0031929	TOR signaling	5	18	0.277778	0.99416	0.0142986	1	1	KOG1_YEAST	MDS3_YEAST	TCO89_YEAST	VPS64_YEAST	TSC11_YEAST
biological_process	GO:0007266	Rho protein signal transduction	5	8	0.625	0.986011	0.0449155	1	1	SLG1_YEAST	EXO70_YEAST	WSC2_YEAST	RHO5_YEAST	BEM4_YEAST
biological_process	GO:0008360	regulation of cell shape	5	22	0.227273	0.887026	0.236038	1	1	FIG2_YEAST	HBT1_YEAST	KEL1_YEAST	FKS2_YEAST	FKS1_YEAST
biological_process	GO:0000463	maturation of LSU-rRNA from tricistronic rRNA transcript (SSU-rRNA, 5.8S rRNA, LSU-rRNA)	5	38	0.131579	0.441976	0.700827	1	1	IPI1_YEAST	ERB1_YEAST	PRP43_YEAST	DBP10_YEAST	DBP6_YEAST
biological_process	GO:0000755	cytogamy	5	11	0.454545	0.987282	0.0525565	1	1	RSR1_YEAST	FIG2_YEAST	STE3_YEAST	KEL1_YEAST	BUD3_YEAST
biological_process	GO:0031507	heterochromatin assembly	5	18	0.277778	0.729403	0.351095	1	1	SIR1_YEAST	SIR3_YEAST	ZDS1_YEAST	NU170_YEAST	EAF3_YEAST
biological_process	GO:0006337	nucleosome disassembly	5	19	0.263158	0.880782	0.261118	1	1	RSC2_YEAST	RSC30_YEAST	RSC3_YEAST	RSC4_YEAST	ARP9_YEAST
biological_process	GO:0006283	transcription-coupled nucleotide-excision repair	5	11	0.454545	0.904246	0.223776	1	1	SEN1_YEAST	HPR1_YEAST	DEF1_YEAST	SAC3_YEAST	THO2_YEAST
biological_process	GO:0070481	nuclear-transcribed mRNA catabolic process, non-stop decay	5	23	0.217391	0.763962	0.418658	1	1	MTR3_YEAST	SIR3_YEAST	SKI3_YEAST	SKI8_YEAST	SSN3_YEAST
biological_process	GO:0042766	nucleosome mobilization	5	12	0.416667	0.987282	0.0525565	1	1	SNF2_YEAST	ARP5_YEAST	ARP9_YEAST	CHD1_YEAST	INO80_YEAST
biological_process	GO:0009267	cellular response to starvation	5	17	0.294118	0.980139	0.0363298	1	1	KOG1_YEAST	IRS4_YEAST	GTR2_YEAST	TAX4_YEAST	VPS41_YEAST
biological_process	GO:0071472	cellular response to salt stress	5	10	0.5	0.987282	0.0525565	1	1	HPH1_YEAST	PSR1_YEAST	YGK3_YEAST	MCK1_YEAST	HPH2_YEAST
biological_process	GO:0046854	phosphatidylinositol phosphate biosynthetic process	5	14	0.357143	0.957997	0.124346	1	1	BECN1_YEAST	FAB1_YEAST	MSS4_YEAST	VPS38_YEAST	PIK1_YEAST
biological_process	GO:0034398	telomere tethering at nuclear periphery	5	13	0.384615	0.970305	0.0968982	1	1	NUP84_YEAST	SIR3_YEAST	SIR4_YEAST	NU145_YEAST	NU170_YEAST
biological_process	GO:1904262	negative regulation of TORC1 signaling	5	11	0.454545	0.992488	0.0359573	1	1	PSR1_YEAST	NPR2_YEAST	NPR3_YEAST	GCN2_YEAST	ATM_YEAST
biological_process	GO:0042138	meiotic DNA double-strand break formation	4	17	0.235294	0.963791	0.0884281	1	1	RE114_YEAST	COM1_YEAST	SET1_YEAST	PDS5_YEAST
biological_process	GO:0000022	mitotic spindle elongation	4	12	0.333333	0.864473	0.269541	1	1	CBF3A_YEAST	KIP1_YEAST	SP110_YEAST	YHS7_YEAST
biological_process	GO:0000921	septin ring assembly	4	16	0.25	0.845081	0.33646	1	1	CBF3A_YEAST	ELM1_YEAST	CDC3_YEAST	BNI5_YEAST
biological_process	GO:0042274	ribosomal small subunit biogenesis	4	31	0.129032	0.0153717	0.992018	0.996	1	HRR25_YEAST	SAC3_YEAST	UTP21_YEAST	NAT10_YEAST
biological_process	GO:0030447	filamentous growth	4	15	0.266667	0.983403	0.0280099	1	1	BUD2_YEAST	SNF1_YEAST	VPS60_YEAST	AAKG_YEAST
biological_process	GO:0000011	vacuole inheritance	4	19	0.210526	0.738882	0.471617	1	1	PEP12_YEAST	VPS45_YEAST	VAC17_YEAST	CLA4_YEAST
biological_process	GO:0006895	Golgi to endosome transport	4	25	0.16	0.362749	0.806762	1	1	VPS45_YEAST	VPS10_YEAST	CLH_YEAST	GGA2_YEAST
biological_process	GO:0007033	vacuole organization	4	16	0.25	0.846339	0.216748	1	1	VPS45_YEAST	VPS41_YEAST	VPS33_YEAST	GVP36_YEAST
biological_process	GO:0006656	phosphatidylcholine biosynthetic process	4	11	0.363636	0.811786	0.382074	1	1	EKI1_YEAST	CHO2_YEAST	IMB1_YEAST	KICH_YEAST
biological_process	GO:0000079	regulation of cyclin-dependent protein serine/threonine kinase activity	4	26	0.153846	0.430221	0.757804	1	1	PCL6_YEAST	PHO80_YEAST	PP2C3_YEAST	MPIP_YEAST
biological_process	GO:0016239	positive regulation of macroautophagy	4	15	0.266667	0.978621	0.0582019	1	1	EPL1_YEAST	SNF1_YEAST	VPS52_YEAST	GCN2_YEAST
biological_process	GO:0031124	mRNA 3'-end processing	4	23	0.173913	0.96178	0.0763056	1	1	SEN1_YEAST	HPR1_YEAST	SAC3_YEAST	THO2_YEAST
biological_process	GO:0051568	histone H3-K4 methylation	4	12	0.333333	0.738882	0.471617	1	1	SKI8_YEAST	SET1_YEAST	SUS1_YEAST	SWD3_YEAST
biological_process	GO:0048280	vesicle fusion with Golgi apparatus	4	10	0.4	0.992488	0.0359573	1	1	SEC18_YEAST	SED5_YEAST	USO1_YEAST	BET1_YEAST
biological_process	GO:0007062	sister chromatid cohesion	4	14	0.285714	0.973636	0.0506487	1	1	SMC5_YEAST	RSC2_YEAST	SCC3_YEAST	CHD1_YEAST
biological_process	GO:0042149	cellular response to glucose starvation	4	13	0.307692	0.966479	0.0957542	1	1	ELM1_YEAST	REG1_YEAST	SDS24_YEAST	AAKG_YEAST
biological_process	GO:0000747	conjugation with cellular fusion	4	15	0.266667	0.770429	0.306561	1	1	SPT7_YEAST	CHS5_YEAST	SCW4_YEAST	SCW10_YEAST
biological_process	GO:0007232	osmosensory signaling pathway via Sho1 osmosensor	4	7	0.571429	0.996875	0.0247049	1	1	STE50_YEAST	HKR1_YEAST	MSB2_YEAST	YD073_YEAST
biological_process	GO:0001402	signal transduction involved in filamentous growth	4	13	0.307692	0.927103	0.203838	1	1	PLC1_YEAST	STE50_YEAST	HKR1_YEAST	MSB2_YEAST
biological_process	GO:0006367	transcription initiation from RNA polymerase II promoter	4	38	0.105263	0.970252	0.0508265	1	1	TAF5_YEAST	T2AG_YEAST	RPB1_YEAST	TAF10_YEAST
biological_process	GO:0071902	positive regulation of protein serine/threonine kinase activity	4	14	0.285714	0.875654	0.291074	1	1	KOG1_YEAST	PKH1_YEAST	CDC3_YEAST	BNI5_YEAST
biological_process	GO:0002098	tRNA wobble uridine modification	4	28	0.142857	0.553651	0.637251	1	1	HRR25_YEAST	ELP5_YEAST	MSS1_YEAST	ELP4_YEAST
biological_process	GO:0031134	sister chromatid biorientation	4	8	0.5	0.880782	0.261118	1	1	MPS1_YEAST	SP105_YEAST	BUB1_YEAST	2A5D_YEAST
biological_process	GO:0000290	deadenylation-dependent decapping of nuclear-transcribed mRNA	4	20	0.2	0.700253	0.514585	1	1	DCP2_YEAST	DCP1_YEAST	PAT1_YEAST	DHH1_YEAST
biological_process	GO:0006972	hyperosmotic response	4	10	0.4	0.942914	0.154919	1	1	PBS2_YEAST	CYC8_YEAST	HKR1_YEAST	MSB2_YEAST
biological_process	GO:0030491	heteroduplex formation	4	8	0.5	0.992924	0.0423342	1	1	RDH54_YEAST	RAD51_YEAST	RAD54_YEAST	RAD57_YEAST
biological_process	GO:0045144	meiotic sister chromatid segregation	4	9	0.444444	0.966479	0.0957542	1	1	RDH54_YEAST	MMS22_YEAST	KIP3_YEAST	CSM1_YEAST
biological_process	GO:0098781	ncRNA transcription	4	5	0.8	0.614043	0.508144	1	1	PIF1_YEAST	HST3_YEAST	CBF1_YEAST	RRM3_YEAST
biological_process	GO:0006312	mitotic recombination	4	18	0.222222	0.720646	0.404557	1	1	MSH3_YEAST	RAD1_YEAST	RAD51_YEAST	RAD57_YEAST
biological_process	GO:0042254	ribosome biogenesis	4	38	0.105263	0.00492513	0.996806	0.755	1	TM108_YEAST	RPA2_YEAST	ARB1_YEAST	NAF1_YEAST
biological_process	GO:0045807	positive regulation of endocytosis	4	10	0.4	0.986011	0.0449155	1	1	SYP1_YEAST	SLG1_YEAST	ROM2_YEAST	FKS1_YEAST
biological_process	GO:0034976	response to endoplasmic reticulum stress	4	15	0.266667	0.810457	0.269581	1	1	RTN1_YEAST	RTN2_YEAST	LNP_YEAST	SNF1_YEAST
biological_process	GO:0006612	protein targeting to membrane	4	23	0.173913	0.374959	0.744652	1	1	IMB1_YEAST	IMA1_YEAST	WSC4_YEAST	VPS28_YEAST
biological_process	GO:0016197	endosomal transport	4	10	0.4	0.66109	0.428865	1	1	EDE1_YEAST	IRS4_YEAST	SLA1_YEAST	PAN1_YEAST
biological_process	GO:0030950	establishment or maintenance of actin cytoskeleton polarity	4	15	0.266667	0.875654	0.291074	1	1	TSC11_YEAST	BIT61_YEAST	GVP36_YEAST	CBK1_YEAST
biological_process	GO:0001558	regulation of cell growth	4	11	0.363636	0.693683	0.45751	1	1	KOG1_YEAST	TCO89_YEAST	TSC11_YEAST	BIT61_YEAST
biological_process	GO:0045835	negative regulation of meiotic nuclear division	4	9	0.444444	0.964522	0.0925687	1	1	SNT1_YEAST	SIF2_YEAST	SET3_YEAST	HOS4_YEAST
biological_process	GO:1904669	ATP export	4	17	0.235294	0.811786	0.382074	1	1	VPS25_YEAST	VPS28_YEAST	VPS36_YEAST	BRO1_YEAST
biological_process	GO:0042790	nucleolar large rRNA transcription by RNA polymerase I	4	34	0.117647	0.225214	0.894576	1	1	RPA2_YEAST	MOT1_YEAST	RRN6_YEAST	RRN9_YEAST
biological_process	GO:0016559	peroxisome fission	4	11	0.363636	0.964043	0.126551	1	1	RTG1_YEAST	RTG3_YEAST	MDV1_YEAST	VPS1_YEAST
biological_process	GO:0007029	endoplasmic reticulum organization	4	11	0.363636	0.957294	0.0817686	1	1	RTN1_YEAST	SEY1_YEAST	SEC31_YEAST	UIP5_YEAST
biological_process	GO:0032581	ER-dependent peroxisome organization	4	9	0.444444	0.986468	0.0653758	1	1	RTN1_YEAST	RTN2_YEAST	PEX3_YEAST	SEC39_YEAST
biological_process	GO:0010498	proteasomal protein catabolic process	4	16	0.25	0.281111	0.783082	1	1	PSA1_YEAST	PSB2_YEAST	PSA6_YEAST	LTN1_YEAST
biological_process	GO:0000350	generation of catalytic spliceosome for second transesterification step	4	10	0.4	0.976972	0.0936079	1	1	PRP22_YEAST	SLU7_YEAST	PRP16_YEAST	PRP8_YEAST
biological_process	GO:0009306	protein secretion	4	19	0.210526	0.887026	0.236038	1	1	BUG1_YEAST	COPG_YEAST	RTP1_YEAST	SCD5_YEAST
biological_process	GO:0000086	G2/M transition of mitotic cell cycle	4	23	0.173913	0.96794	0.0657712	1	1	HSL1_YEAST	CDC4_YEAST	PIN4_YEAST	MPIP_YEAST
biological_process	GO:0008033	tRNA processing	4	31	0.129032	0.019072	0.990116	0.999	1	SEN1_YEAST	SYKM_YEAST	MCE1_YEAST	STP1_YEAST
biological_process	GO:0030150	protein import into mitochondrial matrix	4	26	0.153846	0.466281	0.729948	1	1	TOM40_YEAST	PAM17_YEAST	SAM50_YEAST	ZIM17_YEAST
biological_process	GO:0050790	regulation of catalytic activity	4	12	0.333333	0.923085	0.104635	1	1	NUP2_YEAST	TRS65_YEAST	SDS24_YEAST	AAKG_YEAST
biological_process	GO:0090630	activation of GTPase activity	4	14	0.285714	0.903102	0.246614	1	1	ROM2_YEAST	BUB2_YEAST	MSB4_YEAST	ROM1_YEAST
biological_process	GO:0070478	nuclear-transcribed mRNA catabolic process, 3'-5' exonucleolytic nonsense-mediated decay	4	17	0.235294	0.811786	0.382074	1	1	NMD2_YEAST	MTR3_YEAST	SKI3_YEAST	SKI8_YEAST
biological_process	GO:0017148	negative regulation of translation	4	17	0.235294	0.919376	0.126774	1	1	SNF1_YEAST	PUF4_YEAST	DHH1_YEAST	EBS1_YEAST
biological_process	GO:0006749	glutathione metabolic process	4	16	0.25	0.864473	0.269541	1	1	GTO2_YEAST	OPLA_YEAST	URE2_YEAST	EF1G1_YEAST
biological_process	GO:0051666	actin cortical patch localization	4	17	0.235294	0.811786	0.382074	1	1	LAS17_YEAST	MYO5_YEAST	BBC1_YEAST	AFI1_YEAST
biological_process	GO:0000706	meiotic DNA double-strand break processing	4	7	0.571429	0.996875	0.0247049	1	1	DNA2_YEAST	COM1_YEAST	SGS1_YEAST	EXO1_YEAST
biological_process	GO:0070550	rDNA condensation	4	13	0.307692	0.927103	0.203838	1	1	SMC2_YEAST	SMC4_YEAST	CSM1_YEAST	CND1_YEAST
biological_process	GO:0000466	maturation of 5.8S rRNA from tricistronic rRNA transcript (SSU-rRNA, 5.8S rRNA, LSU-rRNA)	4	19	0.210526	0.122796	0.927597	1	1	ERB1_YEAST	PRP43_YEAST	DBP10_YEAST	DBP6_YEAST
biological_process	GO:0034613	cellular protein localization	4	27	0.148148	0.977089	0.0291484	1	1	RAX2_YEAST	RAD16_YEAST	CDC3_YEAST	2A5D_YEAST
biological_process	GO:0000132	establishment of mitotic spindle orientation	4	13	0.307692	0.927103	0.203838	1	1	BNI1_YEAST	KIP3_YEAST	SNF1_YEAST	DYHC_YEAST
biological_process	GO:0000281	mitotic cytokinesis	4	12	0.333333	0.989711	0.0198613	1	1	ELM1_YEAST	CDC3_YEAST	CDC15_YEAST	DBF20_YEAST
biological_process	GO:0046686	response to cadmium ion	4	10	0.4	0.927103	0.203838	1	1	MET30_YEAST	MET4_YEAST	ATU1_YEAST	AP1_YEAST
biological_process	GO:0030011	maintenance of cell polarity	4	13	0.307692	0.927103	0.203838	1	1	KES1_YEAST	OSH2_YEAST	CDC3_YEAST	HES1_YEAST
biological_process	GO:0000433	carbon catabolite repression of transcription from RNA polymerase II promoter by glucose	4	11	0.363636	0.964043	0.126551	1	1	MIG1_YEAST	VPS25_YEAST	VPS36_YEAST	GCR1_YEAST
biological_process	GO:0006405	RNA export from nucleus	4	10	0.4	0.949173	0.0827554	1	1	NUP1_YEAST	NU116_YEAST	NU100_YEAST	NU170_YEAST
biological_process	GO:2000786	positive regulation of autophagosome assembly	4	9	0.444444	0.986468	0.0653758	1	1	ATG11_YEAST	PIK1_YEAST	2A5D_YEAST	2ABA_YEAST
biological_process	GO:0019344	cysteine biosynthetic process	4	9	0.444444	0.976972	0.0936079	1	1	MET30_YEAST	MET28_YEAST	MET16_YEAST	MET4_YEAST
biological_process	GO:0007076	mitotic chromosome condensation	4	11	0.363636	0.964043	0.126551	1	1	SMC2_YEAST	SMC4_YEAST	PDS5_YEAST	CND1_YEAST
biological_process	GO:0015918	sterol transport	4	14	0.285714	0.785469	0.37506	1	1	KES1_YEAST	OSH2_YEAST	PRY2_YEAST	HES1_YEAST
biological_process	GO:0007018	microtubule-based movement	4	7	0.571429	0.984115	0.0459277	1	1	KIP1_YEAST	KIP2_YEAST	KIP3_YEAST	DYHC_YEAST
biological_process	GO:0007129	homologous chromosome pairing at meiosis	4	13	0.307692	0.963867	0.0838775	1	1	PDS5_YEAST	ZIP1_YEAST	RAD50_YEAST	HOP1_YEAST
biological_process	GO:0045721	negative regulation of gluconeogenesis	4	11	0.363636	0.964043	0.126551	1	1	FYV10_YEAST	PIB1_YEAST	UBP14_YEAST	RMD5_YEAST
biological_process	GO:0006986	response to unfolded protein	4	10	0.4	0.906771	0.161049	1	1	SNF1_YEAST	REG1_YEAST	ZIM17_YEAST	LHS1_YEAST
biological_process	GO:0031990	mRNA export from nucleus in response to heat stress	4	10	0.4	0.964043	0.126551	1	1	NU100_YEAST	NUP2_YEAST	NUP84_YEAST	NUP59_YEAST
biological_process	GO:0051664	nuclear pore localization	4	10	0.4	0.976972	0.0936079	1	1	NUP85_YEAST	NUP84_YEAST	SYH1_YEAST	NU145_YEAST
biological_process	GO:0032259	methylation	3	20	0.15	0.00524497	0.997717	0.79	1	CHO2_YEAST	YM91_YEAST	ERG6_YEAST
biological_process	GO:0006506	GPI anchor biosynthetic process	3	26	0.115385	0.152655	0.942042	1	1	GPI14_YEAST	GPI13_YEAST	GPI18_YEAST
biological_process	GO:0071786	endoplasmic reticulum tubular network organization	3	7	0.428571	0.975295	0.120893	1	1	RTN1_YEAST	RTN2_YEAST	LNP_YEAST
biological_process	GO:0006006	glucose metabolic process	3	17	0.176471	0.680187	0.438561	1	1	HXKB_YEAST	PDK1_YEAST	RGT1_YEAST
biological_process	GO:0005978	glycogen biosynthetic process	3	13	0.230769	0.581342	0.632328	1	1	GAC1_YEAST	PIG1_YEAST	GDE_YEAST
biological_process	GO:1990961	xenobiotic detoxification by transmembrane export across the plasma membrane	3	19	0.157895	0.528383	0.705512	1	1	PDR10_YEAST	SNQ2_YEAST	DTR1_YEAST
biological_process	GO:0009410	response to xenobiotic stimulus	3	21	0.142857	0.362749	0.806762	1	1	ELM1_YEAST	AP1_YEAST	NPR2_YEAST
biological_process	GO:0016126	sterol biosynthetic process	3	17	0.176471	0.131575	0.945233	1	1	MVD1_YEAST	HES1_YEAST	ERG6_YEAST
biological_process	GO:2000251	positive regulation of actin cytoskeleton reorganization	3	7	0.428571	0.975295	0.120893	1	1	BNI1_YEAST	SSK2_YEAST	SSK1_YEAST
biological_process	GO:0045324	late endosome to vacuole transport	3	19	0.157895	0.680187	0.438561	1	1	BECN1_YEAST	VPS38_YEAST	VPS13_YEAST
biological_process	GO:0031106	septin ring organization	3	11	0.272727	0.863445	0.249225	1	1	BUD4_YEAST	CLA4_YEAST	CDC24_YEAST
biological_process	GO:0005979	regulation of glycogen biosynthetic process	3	7	0.428571	0.836452	0.383162	1	1	PCL6_YEAST	GAC1_YEAST	PIG1_YEAST
biological_process	GO:0006629	lipid metabolic process	3	12	0.25	0.00633089	0.995944	0.864	1	IRS4_YEAST	TAX4_YEAST	PHO81_YEAST
biological_process	GO:0006569	tryptophan catabolic process	3	7	0.428571	0.906392	0.273247	1	1	PDC6_YEAST	KMO_YEAST	ARO10_YEAST
biological_process	GO:0006273	lagging strand elongation	3	9	0.333333	0.873449	0.328258	1	1	DNA2_YEAST	DNLI1_YEAST	DPOA2_YEAST
biological_process	GO:0035753	maintenance of DNA trinucleotide repeats	3	11	0.272727	0.873449	0.328258	1	1	DNLI1_YEAST	CTF18_YEAST	RAD50_YEAST
biological_process	GO:0031126	sno(s)RNA 3'-end processing	3	10	0.3	0.357496	0.796833	1	1	SEN1_YEAST	PTI1_YEAST	YSH1_YEAST
biological_process	GO:0045454	cell redox homeostasis	3	23	0.130435	0.367672	0.822081	1	1	SEN1_YEAST	MDS3_YEAST	PMD1_YEAST
biological_process	GO:0016042	lipid catabolic process	3	13	0.230769	0.0777595	0.963369	1	1	ROG1_YEAST	SPO14_YEAST	YEH1_YEAST
biological_process	GO:0000750	pheromone-dependent signal transduction involved in conjugation with cellular fusion	3	23	0.130435	0.242196	0.89682	1	1	STE50_YEAST	MDG1_YEAST	STE3_YEAST
biological_process	GO:0000226	microtubule cytoskeleton organization	3	13	0.230769	0.954197	0.0732816	1	1	STU1_YEAST	NUM1_YEAST	CIN1_YEAST
biological_process	GO:0090307	mitotic spindle assembly	3	6	0.5	0.811786	0.382074	1	1	STU1_YEAST	KIP1_YEAST	KIP3_YEAST
biological_process	GO:0032120	ascospore-type prospore membrane formation	3	14	0.214286	0.880782	0.261118	1	1	MSO1_YEAST	VPS13_YEAST	MPC70_YEAST
biological_process	GO:0006915	apoptotic process	3	24	0.125	0.302216	0.835798	1	1	MCA1_YEAST	NUC1_YEAST	YSP2_YEAST
biological_process	GO:0000436	carbon catabolite activation of transcription from RNA polymerase II promoter	3	9	0.333333	0.978621	0.0582019	1	1	SNF5_YEAST	SWI1_YEAST	HAP2_YEAST
biological_process	GO:0051225	spindle assembly	3	5	0.6	0.964522	0.0925687	1	1	MPS1_YEAST	BIM1_YEAST	SPC97_YEAST
biological_process	GO:0030474	spindle pole body duplication	3	16	0.1875	0.66354	0.584904	1	1	MPS1_YEAST	PO152_YEAST	POM34_YEAST
biological_process	GO:0000082	G1/S transition of mitotic cell cycle	3	30	0.1	0.347117	0.762961	1	1	CDC4_YEAST	MET30_YEAST	SWI4_YEAST
biological_process	GO:0031087	deadenylation-independent decapping of nuclear-transcribed mRNA	3	7	0.428571	0.975295	0.120893	1	1	DCP2_YEAST	DCP1_YEAST	EDC3_YEAST
biological_process	GO:0000289	nuclear-transcribed mRNA poly(A) tail shortening	3	10	0.3	0.875654	0.291074	1	1	NOT1_YEAST	PAN2_YEAST	VTS1_YEAST
biological_process	GO:0000749	response to pheromone triggering conjugation with cellular fusion	3	10	0.3	0.311151	0.796151	1	1	KIN82_YEAST	NOT1_YEAST	AFB1_YEAST
biological_process	GO:0030968	endoplasmic reticulum unfolded protein response	3	17	0.176471	0.920792	0.1572	1	1	EDE1_YEAST	DFM1_YEAST	HRD1_YEAST
biological_process	GO:0006363	termination of RNA polymerase I transcription	3	19	0.157895	0.528383	0.705512	1	1	REB1_YEAST	RPA2_YEAST	CHD1_YEAST
biological_process	GO:0071932	replication fork reversal	3	4	0.75	0.998869	0.0213041	1	1	PIF1_YEAST	DNA2_YEAST	RRM3_YEAST
biological_process	GO:0007004	telomere maintenance via telomerase	3	15	0.2	0.763962	0.418658	1	1	CDC13_YEAST	TERT_YEAST	RAD50_YEAST
biological_process	GO:0030543	2-micrometer plasmid partitioning	3	7	0.428571	0.975295	0.120893	1	1	REP2_YEAST	BIM1_YEAST	KIP1_YEAST
biological_process	GO:0032511	late endosome to vacuole transport via multivesicular body sorting pathway	3	26	0.115385	0.595443	0.543779	1	1	PKH1_YEAST	VPS60_YEAST	VPS8_YEAST
biological_process	GO:0072671	mitochondria-associated ubiquitin-dependent protein catabolic process	3	13	0.230769	0.796162	0.436959	1	1	UBR1_YEAST	UBP6_YEAST	BRO1_YEAST
biological_process	GO:0043162	ubiquitin-dependent protein catabolic process via the multivesicular body sorting pathway	3	18	0.166667	0.54249	0.620445	1	1	VPS25_YEAST	VPS28_YEAST	VPS36_YEAST
biological_process	GO:0043966	histone H3 acetylation	3	9	0.333333	0.845081	0.33646	1	1	TAF9_YEAST	MED5_YEAST	SAS2_YEAST
biological_process	GO:0000956	nuclear-transcribed mRNA catabolic process	3	16	0.1875	0.948606	0.0787402	1	1	PUF3_YEAST	VTS1_YEAST	CTH2_YEAST
biological_process	GO:0007052	mitotic spindle organization	3	17	0.176471	0.848633	0.254935	1	1	KIP3_YEAST	STU2_YEAST	PTPA2_YEAST
biological_process	GO:0043618	regulation of transcription from RNA polymerase II promoter in response to stress	3	8	0.375	0.994065	0.0136847	1	1	ACA2_YEAST	SET1_YEAST	INO80_YEAST
biological_process	GO:0034198	cellular response to amino acid starvation	3	12	0.25	0.925597	0.173562	1	1	NPR2_YEAST	NPR3_YEAST	GCN2_YEAST
biological_process	GO:1904263	positive regulation of TORC1 signaling	3	11	0.272727	0.873449	0.328258	1	1	GTR2_YEAST	LST4_YEAST	WDR59_YEAST
biological_process	GO:1903432	regulation of TORC1 signaling	3	9	0.333333	0.984115	0.0459277	1	1	WDR59_YEAST	NPR2_YEAST	NPR3_YEAST
biological_process	GO:0010255	glucose mediated signaling pathway	3	8	0.375	0.836452	0.383162	1	1	GPA2_YEAST	KC11_YEAST	KC12_YEAST
biological_process	GO:0061709	reticulophagy	3	15	0.2	0.708926	0.538321	1	1	LNP_YEAST	ATG11_YEAST	ATG1_YEAST
biological_process	GO:0000056	ribosomal small subunit export from nucleus	3	14	0.214286	0.753386	0.488871	1	1	NOP9_YEAST	NUP82_YEAST	ARB1_YEAST
biological_process	GO:0044257	cellular protein catabolic process	3	8	0.375	0.376069	0.681984	1	1	SKP2_YEAST	HSL1_YEAST	MCK1_YEAST
biological_process	GO:0034605	cellular response to heat	3	26	0.115385	0.671345	0.46523	1	1	YGK3_YEAST	MCK1_YEAST	FLO1_YEAST
biological_process	GO:0007034	vacuolar transport	3	18	0.166667	0.830945	0.220109	1	1	VPS10_YEAST	VPS1_YEAST	BRO1_YEAST
biological_process	GO:0010508	positive regulation of autophagy	3	11	0.272727	0.981907	0.0435125	1	1	SFL1_YEAST	NPR2_YEAST	NPR3_YEAST
biological_process	GO:0060628	regulation of ER to Golgi vesicle-mediated transport	3	4	0.75	0.947444	0.163548	1	1	TIP20_YEAST	HRR25_YEAST	BRE5_YEAST
biological_process	GO:0043486	histone exchange	3	18	0.166667	0.581342	0.632328	1	1	SWC4_YEAST	SAS2_YEAST	INO80_YEAST
biological_process	GO:0042173	regulation of sporulation resulting in formation of a cellular spore	3	4	0.75	0.997694	0.0127184	1	1	RSC2_YEAST	UME6_YEAST	IME1_YEAST
biological_process	GO:0070301	cellular response to hydrogen peroxide	3	9	0.333333	0.753386	0.488871	1	1	IRA2_YEAST	FLO1_YEAST	GCN2_YEAST
biological_process	GO:0061587	transfer RNA gene-mediated silencing	3	14	0.214286	0.753386	0.488871	1	1	MOD5_YEAST	REG1_YEAST	HOS1_YEAST
biological_process	GO:0007030	Golgi organization	3	21	0.142857	0.890809	0.202609	1	1	SEC16_YEAST	UIP5_YEAST	COG1_YEAST
biological_process	GO:0051292	nuclear pore complex assembly	3	6	0.5	0.987627	0.0796697	1	1	RTN1_YEAST	IMB1_YEAST	NU170_YEAST
biological_process	GO:0006487	protein N-linked glycosylation	3	46	0.0652174	0.00844246	0.997984	0.939	1	OCH1_YEAST	OST3_YEAST	ALG8_YEAST
biological_process	GO:0010499	proteasomal ubiquitin-independent protein catabolic process	3	17	0.176471	0.617926	0.628368	1	1	PSA1_YEAST	PSB2_YEAST	PSA6_YEAST
biological_process	GO:0000390	spliceosomal complex disassembly	3	6	0.5	0.987627	0.0796697	1	1	PRP22_YEAST	PRP43_YEAST	SP382_YEAST
biological_process	GO:0061408	positive regulation of transcription from RNA polymerase II promoter in response to heat stress	3	15	0.2	0.708926	0.538321	1	1	PSR1_YEAST	SWI4_YEAST	YAK1_YEAST
biological_process	GO:0060237	regulation of fungal-type cell wall organization	3	21	0.142857	0.444143	0.769763	1	1	ROM2_YEAST	AZF1_YEAST	CBK1_YEAST
biological_process	GO:0007096	regulation of exit from mitosis	3	13	0.230769	0.992931	0.0181036	1	1	CDC15_YEAST	CLA4_YEAST	CDC24_YEAST
biological_process	GO:0006614	SRP-dependent cotranslational protein targeting to membrane	3	10	0.3	0.485415	0.739205	1	1	SRP68_YEAST	SRPR_YEAST	SRP72_YEAST
biological_process	GO:0006386	termination of RNA polymerase III transcription	3	17	0.176471	0.617926	0.628368	1	1	RPC3_YEAST	RPC2_YEAST	RPC1_YEAST
biological_process	GO:0006383	transcription by RNA polymerase III	3	27	0.111111	0.155918	0.926867	1	1	RPC3_YEAST	RPC2_YEAST	RPC1_YEAST
biological_process	GO:0006384	transcription initiation from RNA polymerase III promoter	3	19	0.157895	0.300241	0.863902	1	1	RPC3_YEAST	RPC2_YEAST	RPC1_YEAST
biological_process	GO:0042797	tRNA transcription by RNA polymerase III	3	18	0.166667	0.572698	0.668581	1	1	RPC3_YEAST	RPC2_YEAST	RPC1_YEAST
biological_process	GO:0034427	nuclear-transcribed mRNA catabolic process, exonucleolytic, 3'-5'	3	14	0.214286	0.776224	0.427302	1	1	MTR3_YEAST	SKI3_YEAST	SKI8_YEAST
biological_process	GO:0061412	positive regulation of transcription from RNA polymerase II promoter in response to amino acid starvation	3	5	0.6	0.995174	0.0460215	1	1	SNF12_YEAST	SNF2_YEAST	SWI1_YEAST
biological_process	GO:0006979	response to oxidative stress	3	11	0.272727	0.0343639	0.980928	1	1	SNF2_YEAST	FCP1_YEAST	SSN3_YEAST
biological_process	GO:0042148	strand invasion	3	4	0.75	0.987627	0.0796697	1	1	SNF2_YEAST	RAD51_YEAST	RAD57_YEAST
biological_process	GO:0045727	positive regulation of translation	3	12	0.25	0.341696	0.782823	1	1	PUF3_YEAST	WHI3_YEAST	DHH1_YEAST
biological_process	GO:0032079	positive regulation of endodeoxyribonuclease activity	3	5	0.6	0.995174	0.0460215	1	1	SRS2_YEAST	VTS1_YEAST	RAD54_YEAST
biological_process	GO:0051601	exocyst localization	3	4	0.75	0.987627	0.0796697	1	1	SEC3_YEAST	EXO84_YEAST	EXO70_YEAST
biological_process	GO:0006995	cellular response to nitrogen starvation	3	13	0.230769	0.572698	0.668581	1	1	BECN1_YEAST	SNF1_YEAST	NPR2_YEAST
biological_process	GO:0033962	P-body assembly	3	6	0.5	0.942914	0.154919	1	1	PAT1_YEAST	DHH1_YEAST	EDC3_YEAST
biological_process	GO:0035066	positive regulation of histone acetylation	3	8	0.375	0.934624	0.219356	1	1	FUN19_YEAST	SET1_YEAST	YO338_YEAST
biological_process	GO:0010629	negative regulation of gene expression	3	8	0.375	0.971399	0.0424582	1	1	SET1_YEAST	SPP41_YEAST	CLA4_YEAST
biological_process	GO:0071469	cellular response to alkaline pH	3	5	0.6	0.975295	0.120893	1	1	HPH1_YEAST	PACC_YEAST	HPH2_YEAST
biological_process	GO:0043248	proteasome assembly	3	19	0.157895	0.119517	0.95699	1	1	SPG5_YEAST	POC2_YEAST	UMP1_YEAST
biological_process	GO:0051455	monopolar spindle attachment to meiosis I kinetochore	3	6	0.5	0.975295	0.120893	1	1	HRR25_YEAST	DSN1_YEAST	CSM1_YEAST
biological_process	GO:0034316	negative regulation of Arp2/3 complex-mediated actin nucleation	3	7	0.428571	0.975295	0.120893	1	1	LSB1_YEAST	SLA1_YEAST	BBC1_YEAST
biological_process	GO:0051016	barbed-end actin filament capping	3	8	0.375	0.976972	0.0936079	1	1	BNI1_YEAST	TWF1_YEAST	AIM3_YEAST
biological_process	GO:0006413	translational initiation	3	26	0.115385	0.0461203	0.980906	1	1	EIF3A_YEAST	IF4F1_YEAST	IF4F2_YEAST
biological_process	GO:0006000	fructose metabolic process	3	7	0.428571	0.975295	0.120893	1	1	HXKB_YEAST	6P22_YEAST	6P21_YEAST
biological_process	GO:0046855	inositol phosphate dephosphorylation	3	9	0.333333	0.934624	0.219356	1	1	INP53_YEAST	INP51_YEAST	INP52_YEAST
biological_process	GO:0031145	anaphase-promoting complex-dependent catabolic process	3	18	0.166667	0.572698	0.668581	1	1	CDC27_YEAST	CDC20_YEAST	ACL4_YEAST
biological_process	GO:0009272	fungal-type cell wall biogenesis	3	17	0.176471	0.205496	0.867307	1	1	PMT1_YEAST	PACC_YEAST	YO365_YEAST
biological_process	GO:0051315	attachment of mitotic spindle microtubules to kinetochore	3	6	0.5	0.904246	0.223776	1	1	CSM1_YEAST	MAD1_YEAST	NDC80_YEAST
biological_process	GO:0000742	karyogamy involved in conjugation with cellular fusion	3	15	0.2	0.708926	0.538321	1	1	PRM2_YEAST	SP110_YEAST	KAR3_YEAST
biological_process	GO:0032465	regulation of cytokinesis	3	10	0.3	0.661732	0.515767	1	1	FIR1_YEAST	KEL1_YEAST	DBF2_YEAST
biological_process	GO:0000301	retrograde transport, vesicle recycling within Golgi	3	6	0.5	0.987627	0.0796697	1	1	COG4_YEAST	COG2_YEAST	COG1_YEAST
biological_process	GO:0006644	phospholipid metabolic process	3	13	0.230769	0.276238	0.789282	1	1	SPO14_YEAST	TGL4_YEAST	EMC4_YEAST
biological_process	GO:0006400	tRNA modification	3	28	0.107143	0.107958	0.940421	1	1	MOD5_YEAST	ELP5_YEAST	MTU1_YEAST
biological_process	GO:0000753	cell morphogenesis involved in conjugation with cellular fusion	3	8	0.375	0.708926	0.538321	1	1	FIG2_YEAST	HBT1_YEAST	SPO14_YEAST
biological_process	GO:0043570	maintenance of DNA repeat elements	3	7	0.428571	0.954236	0.106392	1	1	MSH3_YEAST	TOF1_YEAST	MRC1_YEAST
biological_process	GO:0034497	protein localization to phagophore assembly site	3	16	0.1875	0.66354	0.584904	1	1	HSV2_YEAST	ATG11_YEAST	ATG13_YEAST
biological_process	GO:0046856	phosphatidylinositol dephosphorylation	3	7	0.428571	0.753386	0.488871	1	1	INP53_YEAST	INP51_YEAST	INP52_YEAST
biological_process	GO:0000730	DNA recombinase assembly	3	9	0.333333	0.873449	0.328258	1	1	CSM2_YEAST	RAD51_YEAST	RAD57_YEAST
biological_process	GO:0006537	glutamate biosynthetic process	3	9	0.333333	0.934624	0.219356	1	1	PUT1_YEAST	PUT2_YEAST	GLT1_YEAST
biological_process	GO:0036003	positive regulation of transcription from RNA polymerase II promoter in response to stress	3	9	0.333333	0.989027	0.0286237	1	1	HAA1_YEAST	RLM1_YEAST	AP1_YEAST
biological_process	GO:0048017	inositol lipid-mediated signaling	3	6	0.5	0.992488	0.0359573	1	1	IRS4_YEAST	SPO14_YEAST	TAX4_YEAST
biological_process	GO:0007534	gene conversion at mating-type locus	3	5	0.6	0.995174	0.0460215	1	1	COM1_YEAST	SGS1_YEAST	EXO1_YEAST
biological_process	GO:0046822	regulation of nucleocytoplasmic transport	3	6	0.5	0.826438	0.33918	1	1	IMB1_YEAST	SGF73_YEAST	NU145_YEAST
biological_process	GO:0006898	receptor-mediated endocytosis	3	7	0.428571	0.996066	0.0128243	1	1	YPP1_YEAST	MYO5_YEAST	CLH_YEAST
biological_process	GO:0006611	protein export from nucleus	3	12	0.25	0.708926	0.538321	1	1	NUP2_YEAST	SAC3_YEAST	NUP82_YEAST
biological_process	GO:2000601	positive regulation of Arp2/3 complex-mediated actin nucleation	3	8	0.375	0.957666	0.168029	1	1	LAS17_YEAST	PAN1_YEAST	MYO5_YEAST
biological_process	GO:0045842	positive regulation of mitotic metaphase/anaphase transition	3	9	0.333333	0.873449	0.328258	1	1	CDC27_YEAST	CDC20_YEAST	ACL4_YEAST
biological_process	GO:0006284	base-excision repair	3	14	0.214286	0.738882	0.471617	1	1	DNLI1_YEAST	RAD50_YEAST	DPOE_YEAST
biological_process	GO:0000902	cell morphogenesis	3	10	0.3	0.825054	0.279826	1	1	KC11_YEAST	KC12_YEAST	ELM1_YEAST
biological_process	GO:0035621	ER to Golgi ceramide transport	3	5	0.6	0.995174	0.0460215	1	1	KES1_YEAST	NVJ2_YEAST	OSH2_YEAST
biological_process	GO:0000076	DNA replication checkpoint signaling	3	8	0.375	0.845081	0.33646	1	1	TOF1_YEAST	MRC1_YEAST	DDC1_YEAST
biological_process	GO:0048478	replication fork protection	3	6	0.5	0.987627	0.0796697	1	1	CHK1_YEAST	TOF1_YEAST	MRC1_YEAST
biological_process	GO:0051307	meiotic chromosome separation	3	5	0.6	0.975775	0.0750099	1	1	SMC2_YEAST	SMC4_YEAST	CND1_YEAST
biological_process	GO:0010032	meiotic chromosome condensation	3	4	0.75	0.998869	0.0213041	1	1	SMC2_YEAST	SMC4_YEAST	CND1_YEAST
biological_process	GO:0070058	tRNA gene clustering	3	7	0.428571	0.975295	0.120893	1	1	SMC2_YEAST	SMC4_YEAST	CND1_YEAST
biological_process	GO:0001198	negative regulation of mating-type specific transcription from RNA polymerase II promoter	3	5	0.6	0.995174	0.0460215	1	1	HMAL2_YEAST	MTAL2_YEAST	MCM1_YEAST
biological_process	GO:0032456	endocytic recycling	3	13	0.230769	0.796162	0.436959	1	1	GTR2_YEAST	SNX4_YEAST	VPS52_YEAST
biological_process	GO:0048211	Golgi vesicle docking	3	5	0.6	0.995174	0.0460215	1	1	CASP_YEAST	SEC18_YEAST	USO1_YEAST
biological_process	GO:0000266	mitochondrial fission	3	8	0.375	0.934624	0.219356	1	1	MDM36_YEAST	NUM1_YEAST	MDV1_YEAST
biological_process	GO:0036297	interstrand cross-link repair	3	8	0.375	0.976972	0.0936079	1	1	EXO5_YEAST	SLX4_YEAST	CHL1_YEAST
biological_process	GO:0031122	cytoplasmic microtubule organization	3	8	0.375	0.992488	0.0359573	1	1	SPC72_YEAST	SPC97_YEAST	DYHC_YEAST
biological_process	GO:0006075	(1->3)-beta-D-glucan biosynthetic process	3	5	0.6	0.873449	0.328258	1	1	HKR1_YEAST	FKS2_YEAST	FKS1_YEAST
biological_process	GO:0051646	mitochondrion localization	3	4	0.75	0.945075	0.117411	1	1	MDM36_YEAST	NUM1_YEAST	PUF3_YEAST
biological_process	GO:0051607	defense response to virus	3	5	0.6	0.995174	0.0460215	1	1	SKI3_YEAST	SKI8_YEAST	NUC1_YEAST
biological_process	GO:0044818	mitotic G2/M transition checkpoint	3	3	1	0.988766	0.0420026	1	1	SGS1_YEAST	EXO1_YEAST	2ABA_YEAST
biological_process	GO:1903833	positive regulation of cellular response to amino acid starvation	3	8	0.375	0.957666	0.168029	1	1	NPR2_YEAST	NPR3_YEAST	GCN2_YEAST
biological_process	GO:0035493	SNARE complex assembly	3	6	0.5	0.988766	0.0420026	1	1	SEC9_YEAST	VPS38_YEAST	USO1_YEAST
biological_process	GO:0030866	cortical actin cytoskeleton organization	3	8	0.375	0.963676	0.0712517	1	1	SCD5_YEAST	MSS4_YEAST	CLH_YEAST
biological_process	GO:0010971	positive regulation of G2/M transition of mitotic cell cycle	3	4	0.75	0.998869	0.0213041	1	1	ZDS1_YEAST	MPIP_YEAST	2ABA_YEAST
biological_process	GO:0000423	mitophagy	3	5	0.6	0.979988	0.0728971	1	1	VPS10_YEAST	ATG13_YEAST	GET1_YEAST
biological_process	GO:0031571	mitotic G1 DNA damage checkpoint signaling	2	5	0.4	0.953979	0.22949	1	1	RAD9_YEAST	DDC1_YEAST
biological_process	GO:0006665	sphingolipid metabolic process	2	9	0.222222	0.147627	0.926954	1	1	LCB4_YEAST	KES1_YEAST
biological_process	GO:0006096	glycolytic process	2	26	0.0769231	0.193238	0.922395	1	1	PFKA1_YEAST	HXKB_YEAST
biological_process	GO:1902600	proton transmembrane transport	2	38	0.0526316	0.00079529	0.999851	0.194	1	PFKA1_YEAST	YD183_YEAST
biological_process	GO:0051453	regulation of intracellular pH	2	6	0.333333	0.596407	0.58157	1	1	PFKA1_YEAST	NHX1_YEAST
biological_process	GO:2000222	positive regulation of pseudohyphal growth	2	9	0.222222	0.726753	0.572907	1	1	SIP1_YEAST	SNF1_YEAST
biological_process	GO:0070262	peptidyl-serine dephosphorylation	2	9	0.222222	0.780644	0.512975	1	1	PDP1_YEAST	2ABA_YEAST
biological_process	GO:1990414	replication-born double-strand break repair via sister chromatid exchange	2	14	0.142857	0.511129	0.758026	1	1	PDR10_YEAST	HST3_YEAST
biological_process	GO:0015914	phospholipid transport	2	22	0.0909091	0.0478053	0.98548	1	1	MDM34_YEAST	EMC4_YEAST
biological_process	GO:0060548	negative regulation of cell death	2	5	0.4	0.927103	0.203838	1	1	PDR1_YEAST	VPS35_YEAST
biological_process	GO:2001040	positive regulation of cellular response to drug	2	3	0.666667	0.993826	0.0887032	1	1	PDR1_YEAST	PDR3_YEAST
biological_process	GO:0007032	endosome organization	2	11	0.181818	0.444143	0.769763	1	1	BOB1_YEAST	BOI2_YEAST
biological_process	GO:0035542	regulation of SNARE complex assembly	2	6	0.333333	0.934624	0.219356	1	1	VPS41_YEAST	VPS33_YEAST
biological_process	GO:0032889	regulation of vacuole fusion, non-autophagic	2	14	0.142857	0.511129	0.758026	1	1	VPS33_YEAST	VPS8_YEAST
biological_process	GO:0006904	vesicle docking involved in exocytosis	2	9	0.222222	0.99579	0.0200115	1	1	SEC8_YEAST	MSO1_YEAST
biological_process	GO:0005977	glycogen metabolic process	2	13	0.153846	0.225214	0.894576	1	1	PCL6_YEAST	GAC1_YEAST
biological_process	GO:0043433	negative regulation of DNA-binding transcription factor activity	2	7	0.285714	0.934624	0.219356	1	1	PHO80_YEAST	REG1_YEAST
biological_process	GO:0000083	regulation of transcription involved in G1/S transition of mitotic cell cycle	2	17	0.117647	0.661732	0.515767	1	1	ACE2_YEAST	MET30_YEAST
biological_process	GO:0000949	aromatic amino acid family catabolic process to alcohol via Ehrlich pathway	2	4	0.5	0.978696	0.156102	1	1	PDC6_YEAST	ARO10_YEAST
biological_process	GO:0006559	L-phenylalanine catabolic process	2	5	0.4	0.953979	0.22949	1	1	PDC6_YEAST	ARO10_YEAST
biological_process	GO:0006812	cation transport	2	7	0.285714	3.70496e-05	0.999986	0.013	1	ALR2_YEAST	ALR1_YEAST
biological_process	GO:0051304	chromosome separation	2	3	0.666667	0.989331	0.0224299	1	1	SMC5_YEAST	MPS1_YEAST
biological_process	GO:0051085	chaperone cofactor-dependent protein refolding	2	18	0.111111	0.331419	0.86944	1	1	JJJ2_YEAST	LHS1_YEAST
biological_process	GO:0042026	protein refolding	2	28	0.0714286	0.089567	0.975366	1	1	JJJ2_YEAST	LHS1_YEAST
biological_process	GO:0009263	deoxyribonucleotide biosynthetic process	2	6	0.333333	0.726753	0.572907	1	1	RIR3_YEAST	RIR1_YEAST
biological_process	GO:0000161	osmosensory signaling MAPK cascade	2	5	0.4	0.953979	0.22949	1	1	STE50_YEAST	SSK2_YEAST
biological_process	GO:0008608	attachment of spindle microtubules to kinetochore	2	14	0.142857	0.981907	0.0435125	1	1	STU1_YEAST	DAM1_YEAST
biological_process	GO:0000435	positive regulation of transcription from RNA polymerase II promoter by galactose	2	6	0.333333	0.92033	0.3044	1	1	SSN3_YEAST	GAL4_YEAST
biological_process	GO:0006486	protein glycosylation	2	25	0.08	0.00430773	0.99862	0.723	1	OST3_YEAST	MNL2_YEAST
biological_process	GO:0006875	cellular metal ion homeostasis	2	6	0.333333	0.0373549	0.979871	1	1	PHO80_YEAST	ATU1_YEAST
biological_process	GO:0043619	regulation of transcription from RNA polymerase II promoter in response to oxidative stress	2	9	0.222222	0.726753	0.572907	1	1	SCH9_YEAST	AP1_YEAST
biological_process	GO:0071028	nuclear mRNA surveillance	2	16	0.125	0.518587	0.668419	1	1	MTR3_YEAST	PIN4_YEAST
biological_process	GO:0006417	regulation of translation	2	22	0.0909091	0.389094	0.682561	1	1	MRN1_YEAST	2AAA_YEAST
biological_process	GO:0007089	traversing start control point of mitotic cell cycle	2	13	0.153846	0.563041	0.719575	1	1	SDA1_YEAST	WHI3_YEAST
biological_process	GO:0006265	DNA topological change	2	12	0.166667	0.616838	0.676096	1	1	MMS4_YEAST	SGS1_YEAST
biological_process	GO:0000712	resolution of meiotic recombination intermediates	2	9	0.222222	0.780644	0.512975	1	1	MMS4_YEAST	RAD1_YEAST
biological_process	GO:0000754	adaptation of signaling pathway by response to pheromone involved in conjugation with cellular fusion	2	14	0.142857	0.581342	0.632328	1	1	CSI1_YEAST	BAR1_YEAST
biological_process	GO:0043007	maintenance of rDNA	2	10	0.2	0.726753	0.572907	1	1	CSM2_YEAST	CND1_YEAST
biological_process	GO:0071474	cellular hyperosmotic response	2	3	0.666667	0.92033	0.3044	1	1	PBS2_YEAST	SSK2_YEAST
biological_process	GO:0006207	'de novo' pyrimidine nucleobase biosynthetic process	2	9	0.222222	0.780644	0.512975	1	1	KCY_YEAST	CARA_YEAST
biological_process	GO:0006807	nitrogen compound metabolic process	2	8	0.25	0.15844	0.858682	1	1	DHE2_YEAST	CARA_YEAST
biological_process	GO:0007021	tubulin complex assembly	2	10	0.2	0.726753	0.572907	1	1	PFD5_YEAST	CIN1_YEAST
biological_process	GO:0007031	peroxisome organization	2	19	0.105263	0.720646	0.404557	1	1	VPS1_YEAST	AAKG_YEAST
biological_process	GO:0044806	G-quadruplex DNA unwinding	2	2	1	1	0.0336838	1	1	PIF1_YEAST	RRM3_YEAST
biological_process	GO:0032211	negative regulation of telomere maintenance via telomerase	2	4	0.5	0.978696	0.156102	1	1	PIF1_YEAST	TBF1_YEAST
biological_process	GO:0050821	protein stabilization	2	20	0.1	0.260795	0.90534	1	1	REP2_YEAST	ZIM17_YEAST
biological_process	GO:0043087	regulation of GTPase activity	2	13	0.153846	0.938336	0.114095	1	1	BUD2_YEAST	BEM2_YEAST
biological_process	GO:0006513	protein monoubiquitination	2	15	0.133333	0.415096	0.821387	1	1	UBR1_YEAST	BUL2_YEAST
biological_process	GO:0006808	regulation of nitrogen utilization	2	5	0.4	0.875654	0.291074	1	1	URE2_YEAST	NPR1_YEAST
biological_process	GO:0007117	budding cell bud growth	2	11	0.181818	0.882589	0.221911	1	1	SYP1_YEAST	ELM1_YEAST
biological_process	GO:0008643	carbohydrate transport	2	32	0.0625	0.0153326	0.996056	0.995	1	GAL2_YEAST	STL1_YEAST
biological_process	GO:0000448	cleavage in ITS2 between 5.8S rRNA and LSU-rRNA of tricistronic rRNA transcript (SSU-rRNA, 5.8S rRNA, LSU-rRNA)	2	9	0.222222	0.780644	0.512975	1	1	TOM1_YEAST	LAS1_YEAST
biological_process	GO:0000479	endonucleolytic cleavage of tricistronic rRNA transcript (SSU-rRNA, 5.8S rRNA, LSU-rRNA)	2	4	0.5	0.493906	0.640917	1	1	TSR1_YEAST	BMS1_YEAST
biological_process	GO:0033617	mitochondrial cytochrome c oxidase assembly	2	29	0.0689655	0.077605	0.97929	1	1	COX18_YEAST	PT309_YEAST
biological_process	GO:0051017	actin filament bundle assembly	2	15	0.133333	0.58919	0.604337	1	1	BNI1_YEAST	BBC1_YEAST
biological_process	GO:0070941	eisosome assembly	2	11	0.181818	0.671742	0.627273	1	1	SEG1_YEAST	EIS1_YEAST
biological_process	GO:0038203	TORC2 signaling	2	6	0.333333	0.92033	0.3044	1	1	TSC11_YEAST	BIT61_YEAST
biological_process	GO:2000219	positive regulation of invasive growth in response to glucose limitation	2	7	0.285714	0.879107	0.377802	1	1	SNF5_YEAST	SNF2_YEAST
biological_process	GO:0006900	vesicle budding from membrane	2	6	0.333333	0.971348	0.0695541	1	1	AP18A_YEAST	VPS60_YEAST
biological_process	GO:0045722	positive regulation of gluconeogenesis	2	3	0.666667	0.993826	0.0887032	1	1	SNF1_YEAST	AAKG_YEAST
biological_process	GO:0031335	regulation of sulfur amino acid metabolic process	2	4	0.5	0.995174	0.0460215	1	1	SKP2_YEAST	MET28_YEAST
biological_process	GO:0043666	regulation of phosphoprotein phosphatase activity	2	10	0.2	0.485415	0.739205	1	1	GIP1_YEAST	GIP3_YEAST
biological_process	GO:1903024	positive regulation of ascospore-type prospore membrane formation	2	4	0.5	0.978696	0.156102	1	1	SPS1_YEAST	CDC15_YEAST
biological_process	GO:0010526	negative regulation of transposition, RNA-mediated	2	8	0.25	0.831971	0.447726	1	1	RT107_YEAST	MMS1_YEAST
biological_process	GO:1990683	DNA double-strand break attachment to nuclear envelope	2	5	0.4	0.953979	0.22949	1	1	RT107_YEAST	NSE2_YEAST
biological_process	GO:2000001	regulation of DNA damage checkpoint	2	3	0.666667	0.879107	0.377802	1	1	RT107_YEAST	SLX4_YEAST
biological_process	GO:1903775	regulation of DNA double-strand break processing	2	2	1	1	0.0336838	1	1	RT107_YEAST	SLX4_YEAST
biological_process	GO:0006276	plasmid maintenance	2	6	0.333333	0.970305	0.0968982	1	1	RSC2_YEAST	DML1_YEAST
biological_process	GO:0033262	regulation of nuclear cell cycle DNA replication	2	4	0.5	0.986468	0.0653758	1	1	RSC3_YEAST	MRC1_YEAST
biological_process	GO:2001209	positive regulation of transcription elongation from RNA polymerase I promoter	2	9	0.222222	0.780644	0.512975	1	1	HPR1_YEAST	THO2_YEAST
biological_process	GO:0031930	mitochondria-nucleus signaling pathway	2	7	0.285714	0.879107	0.377802	1	1	RTG1_YEAST	RTG3_YEAST
biological_process	GO:0071788	endoplasmic reticulum tubular network maintenance	2	2	1	1	0.0336838	1	1	RTN1_YEAST	RTN2_YEAST
biological_process	GO:0006099	tricarboxylic acid cycle	2	30	0.0666667	0.0671218	0.982605	1	1	FUMH_YEAST	SDHX_YEAST
biological_process	GO:0071931	positive regulation of transcription involved in G1/S transition of mitotic cell cycle	2	6	0.333333	0.92033	0.3044	1	1	MBP1_YEAST	SWI4_YEAST
biological_process	GO:0006449	regulation of translational termination	2	8	0.25	0.671742	0.627273	1	1	ECM32_YEAST	EF1G1_YEAST
biological_process	GO:0035269	protein O-linked mannosylation	2	12	0.166667	0.616838	0.676096	1	1	PMT1_YEAST	OST3_YEAST
biological_process	GO:2000217	regulation of invasive growth in response to glucose limitation	2	5	0.4	0.875654	0.291074	1	1	SNF1_YEAST	AAKG_YEAST
biological_process	GO:0031333	negative regulation of protein-containing complex assembly	2	6	0.333333	0.963791	0.0884281	1	1	PRK1_YEAST	SP382_YEAST
biological_process	GO:2001159	regulation of protein localization by the Cvt pathway	2	5	0.4	0.953979	0.22949	1	1	SFL1_YEAST	HRR25_YEAST
biological_process	GO:0006370	7-methylguanosine mRNA capping	2	8	0.25	0.831971	0.447726	1	1	MCE1_YEAST	CET1_YEAST
biological_process	GO:0008298	intracellular mRNA localization	2	19	0.105263	0.230237	0.919611	1	1	SHE3_YEAST	PUF3_YEAST
biological_process	GO:0045040	protein insertion into mitochondrial outer membrane	2	16	0.125	0.415096	0.821387	1	1	TOM40_YEAST	SAM50_YEAST
biological_process	GO:0043254	regulation of protein-containing complex assembly	2	7	0.285714	0.984272	0.027422	1	1	SIP1_YEAST	RAV1_YEAST
biological_process	GO:0070072	vacuolar proton-transporting V-type ATPase complex assembly	2	8	0.25	0.831971	0.447726	1	1	VMA22_YEAST	RAV1_YEAST
biological_process	GO:0006031	chitin biosynthetic process	2	4	0.5	0.485415	0.739205	1	1	SHC1_YEAST	CHS1_YEAST
biological_process	GO:0030847	termination of RNA polymerase II transcription, exosome-dependent	2	7	0.285714	0.879107	0.377802	1	1	PTI1_YEAST	PCF11_YEAST
biological_process	GO:1903341	regulation of meiotic DNA double-strand break formation	2	3	0.666667	0.995963	0.0230276	1	1	SET1_YEAST	SWD3_YEAST
biological_process	GO:0045047	protein targeting to ER	2	10	0.2	0.352171	0.790211	1	1	SRPR_YEAST	WSC4_YEAST
biological_process	GO:0045945	positive regulation of transcription by RNA polymerase III	2	3	0.666667	0.993826	0.0887032	1	1	SCH9_YEAST	NAB2_YEAST
biological_process	GO:0006361	transcription initiation from RNA polymerase I promoter	2	18	0.111111	0.294488	0.888726	1	1	RPA2_YEAST	RRN3_YEAST
biological_process	GO:0070651	nonfunctional rRNA decay	2	24	0.0833333	0.155795	0.951209	1	1	MMS1_YEAST	MTR3_YEAST
biological_process	GO:0071035	nuclear polyadenylation-dependent rRNA catabolic process	2	19	0.105263	0.294488	0.888726	1	1	MTR3_YEAST	AIR1_YEAST
biological_process	GO:0071038	nuclear polyadenylation-dependent tRNA catabolic process	2	16	0.125	0.415096	0.821387	1	1	MTR3_YEAST	AIR1_YEAST
biological_process	GO:0006401	RNA catabolic process	2	20	0.1	0.986224	0.0218847	1	1	MTR3_YEAST	NUC1_YEAST
biological_process	GO:0008380	RNA splicing	2	14	0.142857	0.0266043	0.985087	1	1	SLU7_YEAST	YSH1_YEAST
biological_process	GO:0032874	positive regulation of stress-activated MAPK cascade	2	3	0.666667	0.993826	0.0887032	1	1	SNT1_YEAST	SIF2_YEAST
biological_process	GO:1990758	mitotic sister chromatid biorientation	2	12	0.166667	0.616838	0.676096	1	1	SP105_YEAST	DAM1_YEAST
biological_process	GO:0031496	positive regulation of mating type switching	2	4	0.5	0.978696	0.156102	1	1	SNF2_YEAST	SWI1_YEAST
biological_process	GO:0048015	phosphatidylinositol-mediated signaling	2	4	0.5	0.953979	0.22949	1	1	PLC1_YEAST	PIK1_YEAST
biological_process	GO:0043171	peptide catabolic process	2	7	0.285714	0.836452	0.383162	1	1	TM108_YEAST	BAR1_YEAST
biological_process	GO:0071071	regulation of phospholipid biosynthetic process	2	4	0.5	0.371632	0.847123	1	1	NTE1_YEAST	GIS1_YEAST
biological_process	GO:0042407	cristae formation	2	10	0.2	0.726753	0.572907	1	1	MIC60_YEAST	MIC19_YEAST
biological_process	GO:0000183	rDNA heterochromatin assembly	2	23	0.0869565	0.0499651	0.98776	1	1	IRS4_YEAST	SET1_YEAST
biological_process	GO:0006402	mRNA catabolic process	2	7	0.285714	0.9866	0.0221426	1	1	SKI3_YEAST	SKI8_YEAST
biological_process	GO:0000736	double-strand break repair via single-strand annealing, removal of nonhomologous ends	2	4	0.5	0.978696	0.156102	1	1	SLX4_YEAST	RAD1_YEAST
biological_process	GO:0031321	ascospore-type prospore assembly	2	6	0.333333	0.927639	0.160092	1	1	SPO14_YEAST	MSS4_YEAST
biological_process	GO:0045333	cellular respiration	2	31	0.0645161	0.0445275	0.975598	1	1	COX10_YEAST	SDHX_YEAST
biological_process	GO:0009117	nucleotide metabolic process	2	8	0.25	0.000169285	0.999933	0.059	1	ISN1_YEAST	KAD2_YEAST
biological_process	GO:0006446	regulation of translational initiation	2	13	0.153846	0.484233	0.697775	1	1	PAT1_YEAST	GCN2_YEAST
biological_process	GO:0071930	negative regulation of transcription involved in G1/S transition of mitotic cell cycle	2	8	0.25	0.831971	0.447726	1	1	FKH2_YEAST	YOX1_YEAST
biological_process	GO:0048255	mRNA stabilization	2	5	0.4	0.92033	0.3044	1	1	MGA2_YEAST	CBT1_YEAST
biological_process	GO:0006826	iron ion transport	2	12	0.166667	0.252965	0.868425	1	1	FRE1_YEAST	SMF2_YEAST
biological_process	GO:0061157	mRNA destabilization	2	6	0.333333	0.96636	0.0615203	1	1	WHI4_YEAST	WHI3_YEAST
biological_process	GO:1990116	ribosome-associated ubiquitin-dependent protein catabolic process	2	13	0.153846	0.563041	0.719575	1	1	UBR1_YEAST	LTN1_YEAST
biological_process	GO:0006696	ergosterol biosynthetic process	2	25	0.08	0.0671218	0.982605	1	1	ERG10_YEAST	ERG6_YEAST
biological_process	GO:0071039	nuclear polyadenylation-dependent CUT catabolic process	2	10	0.2	0.726753	0.572907	1	1	MTR3_YEAST	AIR1_YEAST
biological_process	GO:0045143	homologous chromosome segregation	2	8	0.25	0.9821	0.0400899	1	1	CSM1_YEAST	2ABA_YEAST
biological_process	GO:0045010	actin nucleation	2	4	0.5	0.971886	0.0723608	1	1	BNI1_YEAST	LAS17_YEAST
biological_process	GO:0070649	formin-nucleated actin cable assembly	2	5	0.4	0.66354	0.584904	1	1	BNI1_YEAST	MSB4_YEAST
biological_process	GO:0043457	regulation of cellular respiration	2	7	0.285714	0.873449	0.328258	1	1	HAP2_YEAST	RIR3_YEAST
biological_process	GO:0010737	protein kinase A signaling	2	6	0.333333	0.92033	0.3044	1	1	GPA2_YEAST	YAK1_YEAST
biological_process	GO:0006631	fatty acid metabolic process	2	15	0.133333	0.0701697	0.967417	1	1	CACP_YEAST	FABG_YEAST
biological_process	GO:0010520	regulation of reciprocal meiotic recombination	2	5	0.4	0.934624	0.219356	1	1	MMS4_YEAST	SGS1_YEAST
biological_process	GO:0010961	cellular magnesium ion homeostasis	2	3	0.666667	0.993826	0.0887032	1	1	ALR2_YEAST	ALR1_YEAST
biological_process	GO:0015824	proline transport	2	4	0.5	0.978696	0.156102	1	1	AVT3_YEAST	NPR2_YEAST
biological_process	GO:0060196	positive regulation of antisense RNA transcription	2	2	1	1	0.0336838	1	1	ACE2_YEAST	GCR2_YEAST
biological_process	GO:0015693	magnesium ion transport	2	5	0.4	0.953979	0.22949	1	1	ALR2_YEAST	ALR1_YEAST
biological_process	GO:0007039	protein catabolic process in the vacuole	2	12	0.166667	0.616838	0.676096	1	1	VID22_YEAST	REG1_YEAST
biological_process	GO:1904750	negative regulation of protein localization to nucleolus	2	7	0.285714	0.879107	0.377802	1	1	SPS1_YEAST	CDC15_YEAST
biological_process	GO:0040020	regulation of meiotic nuclear division	2	7	0.285714	0.93364	0.136555	1	1	CDC20_YEAST	IME1_YEAST
biological_process	GO:0007026	negative regulation of microtubule depolymerization	2	4	0.5	0.978696	0.156102	1	1	BIM1_YEAST	KIP2_YEAST
biological_process	GO:0071230	cellular response to amino acid stimulus	2	7	0.285714	0.934624	0.219356	1	1	KOG1_YEAST	GTR2_YEAST
biological_process	GO:0010506	regulation of autophagy	2	5	0.4	0.942015	0.101977	1	1	KOG1_YEAST	GTR2_YEAST
biological_process	GO:0043967	histone H4 acetylation	2	8	0.25	0.906392	0.273247	1	1	SWC4_YEAST	EAF3_YEAST
biological_process	GO:0044879	mitotic morphogenesis checkpoint signaling	2	5	0.4	0.953979	0.22949	1	1	HSL1_YEAST	BEM2_YEAST
biological_process	GO:1902935	protein localization to septin ring	2	2	1	1	0.0336838	1	1	HSL1_YEAST	ELM1_YEAST
biological_process	GO:1901195	positive regulation of formation of translation preinitiation complex	2	6	0.333333	0.92033	0.3044	1	1	IF4F1_YEAST	IF4F2_YEAST
biological_process	GO:0007020	microtubule nucleation	2	5	0.4	0.987627	0.0796697	1	1	SPC72_YEAST	SPC97_YEAST
biological_process	GO:0001934	positive regulation of protein phosphorylation	2	8	0.25	0.981896	0.0418806	1	1	ATG11_YEAST	MOB2_YEAST
biological_process	GO:0006646	phosphatidylethanolamine biosynthetic process	2	7	0.285714	0.879107	0.377802	1	1	EKI1_YEAST	KICH_YEAST
biological_process	GO:2000370	positive regulation of clathrin-dependent endocytosis	2	4	0.5	0.978696	0.156102	1	1	HRR25_YEAST	SCD5_YEAST
biological_process	GO:0006661	phosphatidylinositol biosynthetic process	2	4	0.5	0.482003	0.658304	1	1	BECN1_YEAST	VAC14_YEAST
biological_process	GO:0000321	re-entry into mitotic cell cycle after pheromone arrest	2	9	0.222222	0.780644	0.512975	1	1	POG1_YEAST	VPS64_YEAST
biological_process	GO:0018027	peptidyl-lysine dimethylation	2	6	0.333333	0.92033	0.3044	1	1	EFM1_YEAST	SET1_YEAST
biological_process	GO:0007155	cell adhesion	2	4	0.5	0.993272	0.0213791	1	1	FIG2_YEAST	SNF1_YEAST
biological_process	GO:0030148	sphingolipid biosynthetic process	2	21	0.0952381	0.190423	0.907001	1	1	TSC11_YEAST	KEI1_YEAST
biological_process	GO:0006012	galactose metabolic process	2	6	0.333333	0.796162	0.436959	1	1	GAL2_YEAST	GAL4_YEAST
biological_process	GO:0006783	heme biosynthetic process	2	13	0.153846	0.371632	0.847123	1	1	ADT1_YEAST	COX10_YEAST
biological_process	GO:0046580	negative regulation of Ras protein signal transduction	2	6	0.333333	0.845081	0.33646	1	1	IRA2_YEAST	IRA1_YEAST
biological_process	GO:0044804	autophagy of nucleus	2	11	0.181818	0.923694	0.139496	1	1	HSV2_YEAST	CND1_YEAST
biological_process	GO:0034085	establishment of sister chromatid cohesion	2	2	1	0.528383	0.705512	1	1	CTF4_YEAST	CHL1_YEAST
biological_process	GO:0031116	positive regulation of microtubule polymerization	2	13	0.153846	0.753386	0.488871	1	1	BIM1_YEAST	DAM1_YEAST
biological_process	GO:0042759	long-chain fatty acid biosynthetic process	2	4	0.5	0.978696	0.156102	1	1	FAS1_YEAST	FAS2_YEAST
biological_process	GO:0072423	response to DNA damage checkpoint signaling	2	3	0.666667	0.993826	0.0887032	1	1	HRP1_YEAST	RNA14_YEAST
biological_process	GO:0000735	removal of nonhomologous ends	2	4	0.5	0.987627	0.0796697	1	1	MSH3_YEAST	RAD1_YEAST
biological_process	GO:0043111	replication fork arrest	2	5	0.4	0.92033	0.3044	1	1	MSH3_YEAST	TOF1_YEAST
biological_process	GO:0051598	meiotic recombination checkpoint signaling	2	9	0.222222	0.780644	0.512975	1	1	HOP1_YEAST	DDC1_YEAST
biological_process	GO:0000128	flocculation	2	6	0.333333	0.976972	0.0936079	1	1	FLO1_YEAST	FLO9_YEAST
biological_process	GO:0045033	peroxisome inheritance	2	5	0.4	0.953979	0.22949	1	1	INP1_YEAST	PEX3_YEAST
biological_process	GO:0071456	cellular response to hypoxia	2	2	1	0.995174	0.0460215	1	1	IXR1_YEAST	UPC2_YEAST
biological_process	GO:1902280	regulation of RNA helicase activity	2	3	0.666667	0.978696	0.156102	1	1	IF4F1_YEAST	IF4F2_YEAST
biological_process	GO:0007193	adenylate cyclase-inhibiting G protein-coupled receptor signaling pathway	2	2	1	1	0.0336838	1	1	IRA2_YEAST	IRA1_YEAST
biological_process	GO:0051654	establishment of mitochondrion localization	2	5	0.4	0.987627	0.0796697	1	1	JSN1_YEAST	NUM1_YEAST
biological_process	GO:0031503	protein-containing complex localization	2	14	0.142857	0.954012	0.0679037	1	1	JSN1_YEAST	ATG11_YEAST
biological_process	GO:0016237	lysosomal microautophagy	2	13	0.153846	0.923882	0.133286	1	1	GTR2_YEAST	2ABA_YEAST
biological_process	GO:0016071	mRNA metabolic process	2	5	0.4	0.834001	0.203599	1	1	NCA2_YEAST	SGN1_YEAST
biological_process	GO:0030953	astral microtubule organization	2	3	0.666667	0.998869	0.0213041	1	1	NUD1_YEAST	SPC72_YEAST
biological_process	GO:0051293	establishment of spindle localization	2	3	0.666667	0.904246	0.223776	1	1	NUD1_YEAST	DYHC_YEAST
biological_process	GO:0000073	initial mitotic spindle pole body separation	2	4	0.5	0.563041	0.719575	1	1	NUD1_YEAST	KIP1_YEAST
biological_process	GO:0007091	metaphase/anaphase transition of mitotic cell cycle	2	6	0.333333	0.952304	0.0944465	1	1	CDC27_YEAST	ACL4_YEAST
biological_process	GO:0071897	DNA biosynthetic process	2	3	0.666667	0.721477	0.397999	1	1	DNLI1_YEAST	DPOA2_YEAST
biological_process	GO:0006003	fructose 2,6-bisphosphate metabolic process	2	4	0.5	0.978696	0.156102	1	1	6P22_YEAST	6P21_YEAST
biological_process	GO:0034315	regulation of Arp2/3 complex-mediated actin nucleation	2	2	1	0.9929	0.0296951	1	1	LAS17_YEAST	SLA1_YEAST
biological_process	GO:0097695	establishment of protein-containing complex localization to telomere	2	5	0.4	0.953979	0.22949	1	1	SIR3_YEAST	SIR4_YEAST
biological_process	GO:0061136	regulation of proteasomal protein catabolic process	2	3	0.666667	0.873449	0.328258	1	1	OAZ_YEAST	UBP6_YEAST
biological_process	GO:2001020	regulation of response to DNA damage stimulus	2	7	0.285714	0.93364	0.136555	1	1	CYC8_YEAST	DEF1_YEAST
biological_process	GO:0051229	meiotic spindle disassembly	2	3	0.666667	0.993826	0.0887032	1	1	SPS1_YEAST	CDC15_YEAST
biological_process	GO:0046685	response to arsenic-containing substance	2	6	0.333333	0.836452	0.383162	1	1	MET30_YEAST	MET4_YEAST
biological_process	GO:0090282	positive regulation of transcription involved in G2/M transition of mitotic cell cycle	2	3	0.666667	0.993826	0.0887032	1	1	FKH2_YEAST	NDD1_YEAST
biological_process	GO:1902275	regulation of chromatin organization	2	5	0.4	0.468878	0.677512	1	1	SET1_YEAST	CHD1_YEAST
biological_process	GO:0009749	response to glucose	2	4	0.5	0.708926	0.538321	1	1	KC11_YEAST	KC12_YEAST
biological_process	GO:0015886	heme transport	2	7	0.285714	0.831971	0.447726	1	1	ADT1_YEAST	MGM1_YEAST
biological_process	GO:0006839	mitochondrial transport	2	9	0.222222	0.00350655	0.998618	0.658	1	ADT1_YEAST	YMC2_YEAST
biological_process	GO:1903342	negative regulation of meiotic DNA double-strand break formation	2	3	0.666667	0.978696	0.156102	1	1	SMC2_YEAST	CND1_YEAST
biological_process	GO:0044805	late nucleophagy	2	17	0.117647	0.371632	0.847123	1	1	ATG13_YEAST	ATG1_YEAST
biological_process	GO:0009098	leucine biosynthetic process	2	7	0.285714	0.879107	0.377802	1	1	LEUR_YEAST	LEU1_YEAST
biological_process	GO:0016320	endoplasmic reticulum membrane fusion	2	3	0.666667	0.993826	0.0887032	1	1	SEY1_YEAST	UFE1_YEAST
biological_process	GO:1900182	positive regulation of protein localization to nucleus	2	5	0.4	0.934624	0.219356	1	1	CET1_YEAST	2ABA_YEAST
biological_process	GO:0030970	retrograde protein transport, ER to cytosol	2	9	0.222222	0.906392	0.273247	1	1	HRD3_YEAST	HRD1_YEAST
biological_process	GO:0008152	metabolic process	2	2	1	0.00189715	0.998529	0.435	1	ENG2_YEAST	ENG1_YEAST
biological_process	GO:0034247	snoRNA splicing	2	4	0.5	0.978696	0.156102	1	1	PRP4_YEAST	YSH1_YEAST
biological_process	GO:0045921	positive regulation of exocytosis	2	4	0.5	0.978696	0.156102	1	1	KIN1_YEAST	KIN2_YEAST
biological_process	GO:1903896	positive regulation of IRE1-mediated unfolded protein response	2	2	1	1	0.0336838	1	1	KIN1_YEAST	KIN2_YEAST
biological_process	GO:0046785	microtubule polymerization	2	2	1	0.984115	0.0459277	1	1	KIP2_YEAST	STU2_YEAST
biological_process	GO:0008053	mitochondrial fusion	2	4	0.5	0.831971	0.447726	1	1	FZO1_YEAST	MGM1_YEAST
biological_process	GO:1990627	mitochondrial inner membrane fusion	2	3	0.666667	0.993826	0.0887032	1	1	FZO1_YEAST	MGM1_YEAST
biological_process	GO:1990626	mitochondrial outer membrane fusion	2	3	0.666667	0.993826	0.0887032	1	1	FZO1_YEAST	MGM1_YEAST
biological_process	GO:0048193	Golgi vesicle transport	2	2	1	0.984314	0.023778	1	1	CASP_YEAST	GOSR1_YEAST
biological_process	GO:0006817	phosphate ion transport	2	11	0.181818	0.461679	0.791826	1	1	PHO90_YEAST	PHO91_YEAST
biological_process	GO:1903778	protein localization to vacuolar membrane	2	4	0.5	0.831971	0.447726	1	1	GTR2_YEAST	VAC14_YEAST
biological_process	GO:0000741	karyogamy	2	7	0.285714	0.796066	0.378958	1	1	SPC72_YEAST	DYHC_YEAST
biological_process	GO:0030004	cellular monovalent inorganic cation homeostasis	2	3	0.666667	0.483097	0.674014	1	1	NAH1_YEAST	NHX1_YEAST
biological_process	GO:0035725	sodium ion transmembrane transport	2	2	1	1	0.0336838	1	1	NAH1_YEAST	NHX1_YEAST
biological_process	GO:0010608	posttranscriptional regulation of gene expression	2	3	0.666667	0.537474	0.536367	1	1	PUF3_YEAST	PUF4_YEAST
biological_process	GO:0006892	post-Golgi vesicle-mediated transport	2	12	0.166667	0.886211	0.174496	1	1	KES1_YEAST	VPS10_YEAST
biological_process	GO:1900436	positive regulation of filamentous growth of a population of unicellular organisms in response to starvation	2	4	0.5	0.978696	0.156102	1	1	MIG1_YEAST	SNF1_YEAST
biological_process	GO:0030488	tRNA methylation	2	23	0.0869565	0.177919	0.942292	1	1	MSS1_YEAST	TR732_YEAST
biological_process	GO:0036086	positive regulation of transcription from RNA polymerase II promoter in response to iron ion starvation	2	3	0.666667	0.993826	0.0887032	1	1	MGA2_YEAST	AFT1_YEAST
biological_process	GO:0033260	nuclear DNA replication	2	4	0.5	0.992721	0.0179001	1	1	PPS1_YEAST	MCM4_YEAST
biological_process	GO:0006271	DNA strand elongation involved in DNA replication	2	9	0.222222	0.756027	0.41081	1	1	MCM4_YEAST	MCM6_YEAST
biological_process	GO:0009231	riboflavin biosynthetic process	2	7	0.285714	0.879107	0.377802	1	1	RISA_YEAST	RIB2_YEAST
biological_process	GO:0007095	mitotic G2 DNA damage checkpoint signaling	2	4	0.5	0.978696	0.156102	1	1	CHK1_YEAST	DDC1_YEAST
biological_process	GO:1900186	negative regulation of clathrin-dependent endocytosis	2	2	1	1	0.0336838	1	1	PRK1_YEAST	AKL1_YEAST
biological_process	GO:0006797	polyphosphate metabolic process	2	11	0.181818	0.511129	0.758026	1	1	PHO90_YEAST	PHO91_YEAST
biological_process	GO:0006421	asparaginyl-tRNA aminoacylation	2	2	1	1	0.0336838	1	1	SYNM_YEAST	SYNC_YEAST
biological_process	GO:0010133	proline catabolic process to glutamate	2	2	1	0.993826	0.0887032	1	1	PUT1_YEAST	PUT2_YEAST
biological_process	GO:0016578	histone deubiquitination	2	7	0.285714	0.879107	0.377802	1	1	SGF73_YEAST	SUS1_YEAST
biological_process	GO:0090153	regulation of sphingolipid biosynthetic process	2	3	0.666667	0.726753	0.572907	1	1	SCH9_YEAST	NPR1_YEAST
biological_process	GO:0006479	protein methylation	2	4	0.5	0.182937	0.901155	1	1	SET1_YEAST	SET3_YEAST
biological_process	GO:1900101	regulation of endoplasmic reticulum unfolded protein response	2	6	0.333333	0.9929	0.0296951	1	1	PMT1_YEAST	AP1_YEAST
biological_process	GO:0098656	anion transmembrane transport	2	3	0.666667	0.0405014	0.984724	1	1	PHO90_YEAST	PHO91_YEAST
biological_process	GO:2000185	regulation of phosphate transmembrane transport	2	4	0.5	0.978696	0.156102	1	1	PHO90_YEAST	PHO91_YEAST
biological_process	GO:0043968	histone H2A acetylation	2	4	0.5	0.978696	0.156102	1	1	SWC4_YEAST	EAF3_YEAST
biological_process	GO:1904547	regulation of cellular response to glucose starvation	2	3	0.666667	0.993826	0.0887032	1	1	SNF1_YEAST	AAKG_YEAST
biological_process	GO:0033235	positive regulation of protein sumoylation	2	5	0.4	0.953979	0.22949	1	1	SPO22_YEAST	ZIP1_YEAST
biological_process	GO:0036010	protein localization to endosome	2	6	0.333333	0.92033	0.3044	1	1	SNX4_YEAST	BRO1_YEAST
biological_process	GO:0034728	nucleosome organization	2	3	0.666667	0.520338	0.592743	1	1	CHD1_YEAST	GCR1_YEAST
biological_process	GO:0001197	positive regulation of mating-type specific transcription from RNA polymerase II promoter	2	2	1	1	0.0336838	1	1	MTAL1_YEAST	MCM1_YEAST
biological_process	GO:0015691	cadmium ion transport	2	3	0.666667	0.993826	0.0887032	1	1	ATU1_YEAST	BPT1_YEAST
biological_process	GO:0090083	regulation of inclusion body assembly	2	2	1	1	0.0336838	1	1	SED5_YEAST	VPS13_YEAST
biological_process	GO:2001033	negative regulation of double-strand break repair via nonhomologous end joining	2	3	0.666667	0.993826	0.0887032	1	1	SP382_YEAST	ULS1_YEAST
biological_process	GO:0007234	osmosensory signaling via phosphorelay pathway	2	4	0.5	0.978696	0.156102	1	1	SSK2_YEAST	SSK1_YEAST
biological_process	GO:0032147	activation of protein kinase activity	2	4	0.5	0.978696	0.156102	1	1	ATG13_YEAST	DDC1_YEAST
biological_process	GO:0034058	endosomal vesicle fusion	2	4	0.5	0.978696	0.156102	1	1	VPS41_YEAST	VPS8_YEAST
biological_process	GO:0061013	regulation of mRNA catabolic process	2	2	1	0.985214	0.0279093	1	1	WHI3_YEAST	DBF20_YEAST
biological_process	GO:0043504	mitochondrial DNA repair	2	4	0.5	0.978696	0.156102	1	1	MSH1_YEAST	RAD51_YEAST
biological_process	GO:0000715	nucleotide-excision repair, DNA damage recognition	2	5	0.4	0.953979	0.22949	1	1	RAD16_YEAST	RAD1_YEAST
biological_process	GO:0031107	septin ring disassembly	2	2	1	1	0.0336838	1	1	CDC3_YEAST	2A5D_YEAST
biological_process	GO:0051754	meiotic sister chromatid cohesion, centromeric	2	3	0.666667	0.978696	0.156102	1	1	BUB1_YEAST	2A5D_YEAST
biological_process	GO:0001881	receptor recycling	2	2	1	0.831971	0.447726	1	1	BOB1_YEAST	BOI2_YEAST
biological_process	GO:0051278	fungal-type cell wall polysaccharide biosynthetic process	2	3	0.666667	0.563041	0.719575	1	1	FKS2_YEAST	FKS1_YEAST
biological_process	GO:0032007	negative regulation of TOR signaling	2	3	0.666667	0.992488	0.0359573	1	1	NPR2_YEAST	NPR3_YEAST
biological_process	GO:0006287	base-excision repair, gap-filling	2	2	1	1	0.0336838	1	1	DPOD_YEAST	DPOE_YEAST
biological_process	GO:0045004	DNA replication proofreading	2	2	1	1	0.0336838	1	1	DPOD_YEAST	DPOE_YEAST
biological_process	GO:0006297	nucleotide-excision repair, DNA gap filling	2	3	0.666667	0.993826	0.0887032	1	1	DPOD_YEAST	DPOE_YEAST
biological_process	GO:0015986	ATP synthesis coupled proton transport	1	18	0.0555556	0.0577079	0.990692	1	1	ATPD_YEAST
biological_process	GO:0006353	DNA-templated transcription, termination	1	10	0.1	0.374959	0.744652	1	1	SEN1_YEAST
biological_process	GO:0070816	phosphorylation of RNA polymerase II C-terminal domain	1	18	0.0555556	0.0487909	0.992409	1	1	SSN3_YEAST
biological_process	GO:0051382	kinetochore assembly	1	12	0.0833333	0.461679	0.791826	1	1	CBF3A_YEAST
biological_process	GO:0006627	protein processing involved in protein targeting to mitochondrion	1	6	0.166667	0.6956	0.70413	1	1	MPPB_YEAST
biological_process	GO:0006796	phosphate-containing compound metabolic process	1	6	0.166667	0.130495	0.89068	1	1	PHO81_YEAST
biological_process	GO:0019722	calcium-mediated signaling	1	7	0.142857	0.671742	0.627273	1	1	LCB4_YEAST
biological_process	GO:0046512	sphingosine biosynthetic process	1	4	0.25	0.843898	0.555904	1	1	LCB4_YEAST
biological_process	GO:0034389	lipid droplet organization	1	8	0.125	0.487025	0.839159	1	1	UME6_YEAST
biological_process	GO:0000096	sulfur amino acid metabolic process	1	5	0.2	0.390219	0.744097	1	1	MET4_YEAST
biological_process	GO:0061621	canonical glycolysis	1	2	0.5	0.966316	0.333537	1	1	PFKA1_YEAST
biological_process	GO:0030388	fructose 1,6-bisphosphate metabolic process	1	3	0.333333	0.911297	0.455954	1	1	PFKA1_YEAST
biological_process	GO:0006002	fructose 6-phosphate metabolic process	1	6	0.166667	0.6956	0.70413	1	1	PFKA1_YEAST
biological_process	GO:0030026	cellular manganese ion homeostasis	1	11	0.0909091	0.372727	0.892889	1	1	SMF2_YEAST
biological_process	GO:1904184	positive regulation of pyruvate dehydrogenase activity	1	2	0.5	0.966316	0.333537	1	1	PDP1_YEAST
biological_process	GO:1901524	regulation of mitophagy	1	4	0.25	0.831971	0.447726	1	1	PDK1_YEAST
biological_process	GO:0061024	membrane organization	1	7	0.142857	0.597226	0.472575	1	1	SEY1_YEAST
biological_process	GO:0019388	galactose catabolic process	1	3	0.333333	0.552274	0.802916	1	1	GRE3_YEAST
biological_process	GO:0051156	glucose 6-phosphate metabolic process	1	8	0.125	0.0803892	0.986008	1	1	HXKB_YEAST
biological_process	GO:0005992	trehalose biosynthetic process	1	7	0.142857	0.622198	0.758518	1	1	TSL1_YEAST
biological_process	GO:0030003	cellular cation homeostasis	1	9	0.111111	0.0585806	0.963555	1	1	SNQ2_YEAST
biological_process	GO:0035376	sterol import	1	6	0.166667	0.6956	0.70413	1	1	CLA4_YEAST
biological_process	GO:0015849	organic acid transport	1	1	1	0.0692286	0.963912	1	1	PDR12_YEAST
biological_process	GO:0043001	Golgi to plasma membrane protein transport	1	12	0.0833333	0.563041	0.719575	1	1	SEC18_YEAST
biological_process	GO:0055092	sterol homeostasis	1	4	0.25	0.77051	0.637508	1	1	SET1_YEAST
biological_process	GO:0071409	cellular response to cycloheximide	1	2	0.5	0.966316	0.333537	1	1	PDR1_YEAST
biological_process	GO:0046677	response to antibiotic	1	7	0.142857	0.622198	0.758518	1	1	PBS2_YEAST
biological_process	GO:0019933	cAMP-mediated signaling	1	2	0.5	0.966316	0.333537	1	1	PDE2_YEAST
biological_process	GO:0016242	negative regulation of macroautophagy	1	8	0.125	0.616838	0.676096	1	1	PHO80_YEAST
biological_process	GO:0031647	regulation of protein stability	1	5	0.2	0.466281	0.729948	1	1	PIB1_YEAST
biological_process	GO:0005981	regulation of glycogen catabolic process	1	2	0.5	0.843898	0.555904	1	1	PCL6_YEAST
biological_process	GO:0009083	branched-chain amino acid catabolic process	1	7	0.142857	0.726753	0.572907	1	1	PDC6_YEAST
biological_process	GO:2001172	positive regulation of glycolytic fermentation to ethanol	1	1	1	1	0.18361	1	1	PDC2_YEAST
biological_process	GO:0090180	positive regulation of thiamine biosynthetic process	1	3	0.333333	0.911297	0.455954	1	1	PDC2_YEAST
biological_process	GO:0006067	ethanol metabolic process	1	4	0.25	0.427093	0.868742	1	1	PDC6_YEAST
biological_process	GO:0070987	error-free translesion synthesis	1	12	0.0833333	0.323904	0.912598	1	1	CSM2_YEAST
biological_process	GO:0034087	establishment of mitotic sister chromatid cohesion	1	17	0.0588235	0.152877	0.9684	1	1	AFT1_YEAST
biological_process	GO:0006272	leading strand elongation	1	12	0.0833333	0.323904	0.912598	1	1	DPOE_YEAST
biological_process	GO:1905779	positive regulation of exonuclease activity	1	2	0.5	0.911297	0.455954	1	1	COM1_YEAST
biological_process	GO:0006301	postreplication repair	1	13	0.0769231	0.518587	0.668419	1	1	PAN2_YEAST
biological_process	GO:0019985	translesion synthesis	1	3	0.333333	0.572698	0.668581	1	1	RPB1_YEAST
biological_process	GO:0071466	cellular response to xenobiotic stimulus	1	3	0.333333	0.552274	0.802916	1	1	RDS2_YEAST
biological_process	GO:0006635	fatty acid beta-oxidation	1	13	0.0769231	0.178613	0.961266	1	1	ERG10_YEAST
biological_process	GO:1900364	negative regulation of mRNA polyadenylation	1	2	0.5	0.966316	0.333537	1	1	NAB2_YEAST
biological_process	GO:1903501	positive regulation of mitotic actomyosin contractile ring assembly	1	6	0.166667	0.6956	0.70413	1	1	ROM2_YEAST
biological_process	GO:0030846	termination of RNA polymerase II transcription, poly(A)-coupled	1	6	0.166667	0.622198	0.758518	1	1	PCF11_YEAST
biological_process	GO:0035494	SNARE complex disassembly	1	3	0.333333	0.911297	0.455954	1	1	SEC18_YEAST
biological_process	GO:0071139	resolution of recombination intermediates	1	2	0.5	0.966316	0.333537	1	1	SMC5_YEAST
biological_process	GO:0000494	box C/D RNA 3'-end processing	1	8	0.125	0.552274	0.802916	1	1	YM8F_YEAST
biological_process	GO:0000470	maturation of LSU-rRNA	1	20	0.05	0.21904	0.872903	1	1	LAS1_YEAST
biological_process	GO:0030490	maturation of SSU-rRNA	1	20	0.05	0.0244019	0.987632	0.999	1	PRP43_YEAST
biological_process	GO:2000221	negative regulation of pseudohyphal growth	1	9	0.111111	0.487025	0.839159	1	1	FKH2_YEAST
biological_process	GO:0000349	generation of catalytic spliceosome for first transesterification step	1	9	0.111111	0.487025	0.839159	1	1	SP382_YEAST
biological_process	GO:0000244	spliceosomal tri-snRNP complex assembly	1	6	0.166667	0.6956	0.70413	1	1	PRP8_YEAST
biological_process	GO:0051083	'de novo' cotranslational protein folding	1	5	0.2	0.77051	0.637508	1	1	ACL4_YEAST
biological_process	GO:0034620	cellular response to unfolded protein	1	11	0.0909091	0.78853	0.331444	1	1	LHS1_YEAST
biological_process	GO:0043085	positive regulation of catalytic activity	1	4	0.25	0.984272	0.027422	1	1	DCP1_YEAST
biological_process	GO:0071590	nicotinamide riboside biosynthetic process	1	2	0.5	0.966316	0.333537	1	1	ISN1_YEAST
biological_process	GO:0071592	nicotinic acid riboside biosynthetic process	1	2	0.5	0.966316	0.333537	1	1	ISN1_YEAST
biological_process	GO:0046020	negative regulation of transcription from RNA polymerase II promoter by pheromones	1	10	0.1	0.427093	0.868742	1	1	YP216_YEAST
biological_process	GO:2000220	regulation of pseudohyphal growth	1	6	0.166667	0.503652	0.699759	1	1	IMB4_YEAST
biological_process	GO:0000196	cell wall integrity MAPK cascade	1	10	0.1	0.427093	0.868742	1	1	PKH1_YEAST
biological_process	GO:0060172	astral microtubule depolymerization	1	1	1	1	0.18361	1	1	STU1_YEAST
biological_process	GO:0030163	protein catabolic process	1	14	0.0714286	0.310015	0.742503	1	1	LTN1_YEAST
biological_process	GO:0006816	calcium ion transport	1	9	0.111111	0.208174	0.952524	1	1	YBT1_YEAST
biological_process	GO:0006811	ion transport	1	8	0.125	7.38224e-06	0.999997	0	1	TOM40_YEAST
biological_process	GO:0042307	positive regulation of protein import into nucleus	1	3	0.333333	0.911297	0.455954	1	1	CLA4_YEAST
biological_process	GO:0046034	ATP metabolic process	1	3	0.333333	0.000959504	0.999707	0.237	1	KAD2_YEAST
biological_process	GO:0000425	pexophagy	1	6	0.166667	0.6956	0.70413	1	1	VPS10_YEAST
biological_process	GO:0007114	cell budding	1	7	0.142857	0.991178	0.0189596	1	1	TGL4_YEAST
biological_process	GO:0032447	protein urmylation	1	7	0.142857	0.622198	0.758518	1	1	URE2_YEAST
biological_process	GO:0002143	tRNA wobble position uridine thiolation	1	6	0.166667	0.6956	0.70413	1	1	MTU1_YEAST
biological_process	GO:0019674	NAD metabolic process	1	4	0.25	0.371632	0.847123	1	1	KMO_YEAST
biological_process	GO:0006878	cellular copper ion homeostasis	1	18	0.0555556	0.13056	0.974221	1	1	HAA1_YEAST
biological_process	GO:0030007	cellular potassium ion homeostasis	1	5	0.2	0.77051	0.637508	1	1	NAH1_YEAST
biological_process	GO:0070131	positive regulation of mitochondrial translation	1	13	0.0769231	0.511129	0.758026	1	1	PT494_YEAST
biological_process	GO:0006813	potassium ion transport	1	6	0.166667	0.708926	0.538321	1	1	YD183_YEAST
biological_process	GO:0032979	protein insertion into mitochondrial inner membrane from matrix	1	9	0.111111	0.487025	0.839159	1	1	COX18_YEAST
biological_process	GO:0033316	meiotic spindle assembly checkpoint signaling	1	1	1	1	0.18361	1	1	MPS1_YEAST
biological_process	GO:0051988	regulation of attachment of spindle microtubules to kinetochore	1	1	1	0.616838	0.676096	1	1	MPS1_YEAST
biological_process	GO:0042594	response to starvation	1	6	0.166667	0.982372	0.0317972	1	1	ATG1_YEAST
biological_process	GO:2000815	regulation of mRNA stability involved in response to oxidative stress	1	4	0.25	0.843898	0.555904	1	1	PIN4_YEAST
biological_process	GO:0000372	Group I intron splicing	1	10	0.1	0.427093	0.868742	1	1	MNE1_YEAST
biological_process	GO:0000737	DNA catabolic process, endonucleolytic	1	2	0.5	0.978696	0.156102	1	1	COM1_YEAST
biological_process	GO:0000395	mRNA 5'-splice site recognition	1	6	0.166667	0.6956	0.70413	1	1	PRP8_YEAST
biological_process	GO:0033314	mitotic DNA replication checkpoint signaling	1	9	0.111111	0.487025	0.839159	1	1	DPOE_YEAST
biological_process	GO:0000165	MAPK cascade	1	4	0.25	0.930446	0.147785	1	1	PBS2_YEAST
biological_process	GO:0007231	osmosensory signaling pathway	1	5	0.2	0.993652	0.0242252	1	1	PBS2_YEAST
biological_process	GO:0006541	glutamine metabolic process	1	21	0.047619	0.136098	0.958801	1	1	CARA_YEAST
biological_process	GO:0007023	post-chaperonin tubulin folding pathway	1	5	0.2	0.77051	0.637508	1	1	CIN1_YEAST
biological_process	GO:0061415	negative regulation of transcription from RNA polymerase II promoter by a nonfermentable carbon source	1	2	0.5	0.966316	0.333537	1	1	RDS2_YEAST
biological_process	GO:0061414	positive regulation of transcription from RNA polymerase II promoter by a nonfermentable carbon source	1	4	0.25	0.843898	0.555904	1	1	RDS2_YEAST
biological_process	GO:0000245	spliceosomal complex assembly	1	14	0.0714286	0.242196	0.89682	1	1	EXO84_YEAST
biological_process	GO:0001174	transcriptional start site selection at RNA polymerase II promoter	1	7	0.142857	0.726753	0.572907	1	1	REB1_YEAST
biological_process	GO:0015976	carbon utilization	1	5	0.2	0.77051	0.637508	1	1	PDK1_YEAST
biological_process	GO:0010906	regulation of glucose metabolic process	1	2	0.5	0.956487	0.0934863	1	1	PDK1_YEAST
biological_process	GO:0007189	adenylate cyclase-activating G protein-coupled receptor signaling pathway	1	3	0.333333	0.911297	0.455954	1	1	GPA2_YEAST
biological_process	GO:0097271	protein localization to bud neck	1	12	0.0833333	0.323904	0.912598	1	1	BUD4_YEAST
biological_process	GO:0010833	telomere maintenance via telomere lengthening	1	5	0.2	0.730459	0.457899	1	1	TBF1_YEAST
biological_process	GO:0006412	translation	1	33	0.030303	7.01385e-10	1	0	1	GCN2_YEAST
biological_process	GO:0006333	chromatin assembly or disassembly	1	15	0.0666667	0.557047	0.520986	1	1	ULS1_YEAST
biological_process	GO:0045732	positive regulation of protein catabolic process	1	6	0.166667	0.726753	0.572907	1	1	TOM1_YEAST
biological_process	GO:0051865	protein autoubiquitination	1	7	0.142857	0.66354	0.584904	1	1	HRD1_YEAST
biological_process	GO:2000232	regulation of rRNA processing	1	5	0.2	0.622198	0.758518	1	1	BMS1_YEAST
biological_process	GO:0010795	regulation of ubiquinone biosynthetic process	1	3	0.333333	0.911297	0.455954	1	1	PUF3_YEAST
biological_process	GO:0034517	ribophagy	1	7	0.142857	0.622198	0.758518	1	1	BRE5_YEAST
biological_process	GO:0070086	ubiquitin-dependent endocytosis	1	12	0.0833333	0.323904	0.912598	1	1	LDB19_YEAST
biological_process	GO:2000144	positive regulation of DNA-templated transcription, initiation	1	1	1	0.965435	0.0745807	1	1	TAF6_YEAST
biological_process	GO:0006420	arginyl-tRNA aminoacylation	1	2	0.5	0.966316	0.333537	1	1	SYRM_YEAST
biological_process	GO:0070144	mitochondrial arginyl-tRNA aminoacylation	1	1	1	1	0.18361	1	1	SYRM_YEAST
biological_process	GO:0070184	mitochondrial tyrosyl-tRNA aminoacylation	1	1	1	1	0.18361	1	1	SYYM_YEAST
biological_process	GO:0043039	tRNA aminoacylation	1	2	0.5	0.352171	0.790211	1	1	SYYM_YEAST
biological_process	GO:0043086	negative regulation of catalytic activity	1	1	1	0.408068	0.747035	1	1	SYP1_YEAST
biological_process	GO:0032185	septin cytoskeleton organization	1	5	0.2	0.855229	0.252698	1	1	SYP1_YEAST
biological_process	GO:0009826	unidimensional cell growth	1	2	0.5	0.843898	0.555904	1	1	SYP1_YEAST
biological_process	GO:1902626	assembly of large subunit precursor of preribosome	1	8	0.125	0.552274	0.802916	1	1	DBP10_YEAST
biological_process	GO:0016558	protein import into peroxisome matrix	1	16	0.0625	0.0681611	0.988588	1	1	PEX5_YEAST
biological_process	GO:0051220	cytoplasmic sequestering of protein	1	1	1	0.993826	0.0887032	1	1	PTP3_YEAST
biological_process	GO:0032297	negative regulation of DNA-dependent DNA replication initiation	1	2	0.5	0.966316	0.333537	1	1	RIF1_YEAST
biological_process	GO:0101018	negative regulation of mitotic DNA replication initiation from late origin	1	1	1	1	0.18361	1	1	RIF1_YEAST
biological_process	GO:0070198	protein localization to chromosome, telomeric region	1	1	1	0.966316	0.333537	1	1	RIF1_YEAST
biological_process	GO:0097752	regulation of DNA stability	1	2	0.5	0.966316	0.333537	1	1	RIF1_YEAST
biological_process	GO:0032008	positive regulation of TOR signaling	1	5	0.2	0.836452	0.383162	1	1	GTR2_YEAST
biological_process	GO:0007097	nuclear migration	1	6	0.166667	0.941798	0.135527	1	1	DYHC_YEAST
biological_process	GO:0031536	positive regulation of exit from mitosis	1	6	0.166667	0.6956	0.70413	1	1	NUD1_YEAST
biological_process	GO:0072659	protein localization to plasma membrane	1	12	0.0833333	0.270052	0.881374	1	1	YPP1_YEAST
biological_process	GO:0010507	negative regulation of autophagy	1	9	0.111111	0.485415	0.739205	1	1	GTR2_YEAST
biological_process	GO:2001108	positive regulation of Rho guanyl-nucleotide exchange factor activity	1	2	0.5	0.966316	0.333537	1	1	RSR1_YEAST
biological_process	GO:0035025	positive regulation of Rho protein signal transduction	1	3	0.333333	0.911297	0.455954	1	1	RSR1_YEAST
biological_process	GO:0038202	TORC1 signaling	1	4	0.25	0.963791	0.0884281	1	1	NPR3_YEAST
biological_process	GO:0071454	cellular response to anoxia	1	3	0.333333	0.911297	0.455954	1	1	PACC_YEAST
biological_process	GO:0070676	intralumenal vesicle formation	1	7	0.142857	0.622198	0.758518	1	1	BRO1_YEAST
biological_process	GO:0034975	protein folding in endoplasmic reticulum	1	14	0.0714286	0.241974	0.941811	1	1	EMC4_YEAST
biological_process	GO:0071465	cellular response to desiccation	1	3	0.333333	0.911297	0.455954	1	1	TREA_YEAST
biological_process	GO:0006865	amino acid transport	1	16	0.0625	0.0457025	0.982472	1	1	LST4_YEAST
biological_process	GO:0016311	dephosphorylation	1	12	0.0833333	0.594687	0.504469	1	1	TSL1_YEAST
biological_process	GO:0036267	invasive filamentous growth	1	4	0.25	0.469134	0.663376	1	1	BUD2_YEAST
biological_process	GO:0032507	maintenance of protein location in cell	1	2	0.5	0.971795	0.0629971	1	1	RSR1_YEAST
biological_process	GO:2000114	regulation of establishment of cell polarity	1	2	0.5	0.993826	0.0887032	1	1	RSR1_YEAST
biological_process	GO:0006473	protein acetylation	1	5	0.2	0.993752	0.0126667	1	1	SCC3_YEAST
biological_process	GO:0000492	box C/D snoRNP assembly	1	9	0.111111	0.487025	0.839159	1	1	RSA1_YEAST
biological_process	GO:0006335	DNA replication-dependent chromatin assembly	1	8	0.125	0.552274	0.802916	1	1	EAF3_YEAST
biological_process	GO:0045332	phospholipid translocation	1	13	0.0769231	0.0946604	0.982846	1	1	KIN82_YEAST
biological_process	GO:0070914	UV-damage excision repair	1	3	0.333333	0.911297	0.455954	1	1	RSC2_YEAST
biological_process	GO:0009303	rRNA transcription	1	6	0.166667	0.12667	0.942867	1	1	DPO5_YEAST
biological_process	GO:0070911	global genome nucleotide-excision repair	1	8	0.125	0.552274	0.802916	1	1	RAD16_YEAST
biological_process	GO:0001015	snoRNA transcription by RNA polymerase II	1	4	0.25	0.843898	0.555904	1	1	TBF1_YEAST
biological_process	GO:0016560	protein import into peroxisome matrix, docking	1	6	0.166667	0.6956	0.70413	1	1	PEX5_YEAST
biological_process	GO:0051237	maintenance of RNA location	1	4	0.25	0.843898	0.555904	1	1	PML39_YEAST
biological_process	GO:0006013	mannose metabolic process	1	4	0.25	0.953979	0.22949	1	1	HXKB_YEAST
biological_process	GO:0035335	peptidyl-tyrosine dephosphorylation	1	2	0.5	0.966316	0.333537	1	1	PTP2_YEAST
biological_process	GO:0061186	negative regulation of silent mating-type cassette heterochromatin assembly	1	11	0.0909091	0.372727	0.892889	1	1	FKH2_YEAST
biological_process	GO:0061163	endoplasmic reticulum polarization	1	3	0.333333	0.911297	0.455954	1	1	YM11_YEAST
biological_process	GO:1902953	positive regulation of ER to Golgi vesicle-mediated transport	1	5	0.2	0.77051	0.637508	1	1	SEC31_YEAST
biological_process	GO:0070863	positive regulation of protein exit from endoplasmic reticulum	1	5	0.2	0.77051	0.637508	1	1	SEC31_YEAST
biological_process	GO:0031204	posttranslational protein targeting to membrane, translocation	1	12	0.0833333	0.241974	0.941811	1	1	LHS1_YEAST
biological_process	GO:1902977	mitotic DNA replication preinitiation complex assembly	1	3	0.333333	0.911297	0.455954	1	1	CDC45_YEAST
biological_process	GO:0016925	protein sumoylation	1	13	0.0769231	0.572698	0.668581	1	1	NSE2_YEAST
biological_process	GO:0017157	regulation of exocytosis	1	6	0.166667	0.906392	0.273247	1	1	GYL1_YEAST
biological_process	GO:0035543	positive regulation of SNARE complex assembly	1	2	0.5	0.966316	0.333537	1	1	VPS45_YEAST
biological_process	GO:0060257	negative regulation of flocculation	1	1	1	1	0.18361	1	1	SEN1_YEAST
biological_process	GO:1990248	regulation of transcription from RNA polymerase II promoter in response to DNA damage	1	1	1	1	0.18361	1	1	SEN1_YEAST
biological_process	GO:0016180	snRNA processing	1	1	1	0.230237	0.919611	1	1	SEN1_YEAST
biological_process	GO:0010458	exit from mitosis	1	8	0.125	0.982459	0.0382198	1	1	DBF20_YEAST
biological_process	GO:0070940	dephosphorylation of RNA polymerase II C-terminal domain	1	6	0.166667	0.6956	0.70413	1	1	FCP1_YEAST
biological_process	GO:0045899	positive regulation of RNA polymerase II transcription preinitiation complex assembly	1	11	0.0909091	0.372727	0.892889	1	1	SGF73_YEAST
biological_process	GO:0070417	cellular response to cold	1	2	0.5	0.843898	0.555904	1	1	IRA2_YEAST
biological_process	GO:0006073	cellular glucan metabolic process	1	4	0.25	0.294221	0.813835	1	1	EXG2_YEAST
biological_process	GO:0009251	glucan catabolic process	1	4	0.25	0.873449	0.328258	1	1	EXG2_YEAST
biological_process	GO:0031144	proteasome localization	1	2	0.5	0.966316	0.333537	1	1	IMA1_YEAST
biological_process	GO:0050708	regulation of protein secretion	1	3	0.333333	0.978696	0.156102	1	1	CBK1_YEAST
biological_process	GO:0016485	protein processing	1	14	0.0714286	0.0390027	0.986771	1	1	DSC3_YEAST
biological_process	GO:0043200	response to amino acid	1	3	0.333333	0.947444	0.163548	1	1	PTR3_YEAST
biological_process	GO:0075297	negative regulation of ascospore formation	1	2	0.5	0.966316	0.333537	1	1	MDS3_YEAST
biological_process	GO:0018026	peptidyl-lysine monomethylation	1	7	0.142857	0.622198	0.758518	1	1	EFM1_YEAST
biological_process	GO:0002092	positive regulation of receptor internalization	1	3	0.333333	0.911297	0.455954	1	1	LDB19_YEAST
biological_process	GO:0006360	transcription by RNA polymerase I	1	19	0.0526316	0.458173	0.65848	1	1	RPA2_YEAST
biological_process	GO:0006362	transcription elongation from RNA polymerase I promoter	1	18	0.0555556	0.332787	0.844205	1	1	RPA2_YEAST
biological_process	GO:0000467	exonucleolytic trimming to generate mature 3'-end of 5.8S rRNA from tricistronic rRNA transcript (SSU-rRNA, 5.8S rRNA, LSU-rRNA)	1	18	0.0555556	0.13056	0.974221	1	1	MTR3_YEAST
biological_process	GO:0071042	nuclear polyadenylation-dependent mRNA catabolic process	1	15	0.0666667	0.208174	0.952524	1	1	MTR3_YEAST
biological_process	GO:0071051	polyadenylation-dependent snoRNA 3'-end processing	1	15	0.0666667	0.208174	0.952524	1	1	MTR3_YEAST
biological_process	GO:0006396	RNA processing	1	18	0.0555556	0.00109316	0.999278	0.274	1	MTR3_YEAST
biological_process	GO:0034475	U4 snRNA 3'-end processing	1	15	0.0666667	0.208174	0.952524	1	1	MTR3_YEAST
biological_process	GO:1900153	positive regulation of nuclear-transcribed mRNA catabolic process, deadenylation-dependent decay	1	4	0.25	0.843898	0.555904	1	1	EDC3_YEAST
biological_process	GO:0045903	positive regulation of translational fidelity	1	9	0.111111	0.487025	0.839159	1	1	NAM9_YEAST
biological_process	GO:0051457	maintenance of protein location in nucleus	1	5	0.2	0.77051	0.637508	1	1	PTP2_YEAST
biological_process	GO:0048208	COPII vesicle coating	1	1	1	0.6956	0.70413	1	1	SEC16_YEAST
biological_process	GO:0070973	protein localization to endoplasmic reticulum exit site	1	4	0.25	0.843898	0.555904	1	1	SEC16_YEAST
biological_process	GO:0006620	posttranslational protein targeting to endoplasmic reticulum membrane	1	9	0.111111	0.20267	0.931839	1	1	NACB1_YEAST
biological_process	GO:0035973	aggrephagy	1	1	1	1	0.18361	1	1	SNF2_YEAST
biological_process	GO:1900189	positive regulation of cell adhesion involved in single-species biofilm formation	1	1	1	1	0.18361	1	1	SNF2_YEAST
biological_process	GO:0032958	inositol phosphate biosynthetic process	1	5	0.2	0.77051	0.637508	1	1	PLC1_YEAST
biological_process	GO:0009395	phospholipid catabolic process	1	3	0.333333	0.671742	0.627273	1	1	PLC1_YEAST
biological_process	GO:0009116	nucleoside metabolic process	1	9	0.111111	0.171954	0.932878	1	1	KPR5_YEAST
biological_process	GO:0006164	purine nucleotide biosynthetic process	1	18	0.0555556	0.0057311	0.998274	0.823	1	KPR5_YEAST
biological_process	GO:0006379	mRNA cleavage	1	5	0.2	0.893608	0.214531	1	1	CFT2_YEAST
biological_process	GO:2000765	regulation of cytoplasmic translation	1	1	1	0.796162	0.436959	1	1	TM108_YEAST
biological_process	GO:0006998	nuclear envelope organization	1	7	0.142857	0.427093	0.868742	1	1	APQ12_YEAST
biological_process	GO:0032781	positive regulation of ATP-dependent activity	1	12	0.0833333	0.461679	0.791826	1	1	HCH1_YEAST
biological_process	GO:0019287	isopentenyl diphosphate biosynthetic process, mevalonate pathway	1	4	0.25	0.77051	0.637508	1	1	MVD1_YEAST
biological_process	GO:0006493	protein O-linked glycosylation	1	16	0.0625	0.332787	0.844205	1	1	MNT4_YEAST
biological_process	GO:0032298	positive regulation of DNA-dependent DNA replication initiation	1	4	0.25	0.77051	0.637508	1	1	FKH2_YEAST
biological_process	GO:0043137	DNA replication, removal of RNA primer	1	8	0.125	0.552274	0.802916	1	1	DPOD_YEAST
biological_process	GO:0016075	rRNA catabolic process	1	11	0.0909091	0.0815567	0.972795	1	1	MTR3_YEAST
biological_process	GO:0048279	vesicle fusion with endoplasmic reticulum	1	4	0.25	0.843898	0.555904	1	1	UFE1_YEAST
biological_process	GO:0009097	isoleucine biosynthetic process	1	11	0.0909091	0.372727	0.892889	1	1	THDH_YEAST
biological_process	GO:0006567	threonine catabolic process	1	3	0.333333	0.911297	0.455954	1	1	THDH_YEAST
biological_process	GO:0030031	cell projection assembly	1	3	0.333333	0.487025	0.839159	1	1	RHO5_YEAST
biological_process	GO:0003333	amino acid transmembrane transport	1	25	0.04	0.0416657	0.987623	1	1	AVT3_YEAST
biological_process	GO:0006430	lysyl-tRNA aminoacylation	1	2	0.5	0.966316	0.333537	1	1	SYKM_YEAST
biological_process	GO:0070154	mitochondrial lysyl-tRNA aminoacylation	1	1	1	1	0.18361	1	1	SYKM_YEAST
biological_process	GO:0010603	regulation of cytoplasmic mRNA processing body assembly	1	3	0.333333	0.873449	0.328258	1	1	DHH1_YEAST
biological_process	GO:0042780	tRNA 3'-end processing	1	4	0.25	0.622198	0.758518	1	1	PT309_YEAST
biological_process	GO:0061406	positive regulation of transcription from RNA polymerase II promoter in response to glucose starvation	1	4	0.25	0.843898	0.555904	1	1	YAK1_YEAST
biological_process	GO:0006279	premeiotic DNA replication	1	8	0.125	0.552274	0.802916	1	1	RIM4_YEAST
biological_process	GO:0042276	error-prone translesion synthesis	1	11	0.0909091	0.372727	0.892889	1	1	DPOE_YEAST
biological_process	GO:0060988	lipid tube assembly	1	3	0.333333	0.911297	0.455954	1	1	VPS1_YEAST
biological_process	GO:1903475	mitotic actomyosin contractile ring assembly	1	11	0.0909091	0.260795	0.90534	1	1	BNI1_YEAST
biological_process	GO:0072741	protein localization to cell division site	1	4	0.25	0.511129	0.758026	1	1	BNI5_YEAST
biological_process	GO:0006404	RNA import into nucleus	1	2	0.5	0.622198	0.758518	1	1	MTR10_YEAST
biological_process	GO:0006121	mitochondrial electron transport, succinate to ubiquinone	1	9	0.111111	0.487025	0.839159	1	1	SDHX_YEAST
biological_process	GO:0000464	endonucleolytic cleavage in ITS1 upstream of 5.8S rRNA from tricistronic rRNA transcript (SSU-rRNA, 5.8S rRNA, LSU-rRNA)	1	3	0.333333	0.911297	0.455954	1	1	DBP3_YEAST
biological_process	GO:0031167	rRNA methylation	1	8	0.125	0.178613	0.961266	1	1	YM8F_YEAST
biological_process	GO:0000461	endonucleolytic cleavage to generate mature 3'-end of SSU-rRNA from (SSU-rRNA, 5.8S rRNA, LSU-rRNA)	1	5	0.2	0.77051	0.637508	1	1	TSR1_YEAST
biological_process	GO:0045947	negative regulation of translational initiation	1	4	0.25	0.843898	0.555904	1	1	PAT1_YEAST
biological_process	GO:0072583	clathrin-dependent endocytosis	1	9	0.111111	0.983136	0.0570859	1	1	AP18A_YEAST
biological_process	GO:0006032	chitin catabolic process	1	4	0.25	0.953979	0.22949	1	1	CHIT_YEAST
biological_process	GO:0000272	polysaccharide catabolic process	1	7	0.142857	0.854769	0.299747	1	1	CHIT_YEAST
biological_process	GO:0051974	negative regulation of telomerase activity	1	5	0.2	0.77051	0.637508	1	1	CDC13_YEAST
biological_process	GO:0032210	regulation of telomere maintenance via telomerase	1	4	0.25	0.906392	0.273247	1	1	CDC13_YEAST
biological_process	GO:0071166	ribonucleoprotein complex localization	1	1	1	0.874765	0.176678	1	1	CDC13_YEAST
biological_process	GO:0071470	cellular response to osmotic stress	1	6	0.166667	0.994572	0.0144256	1	1	GRE3_YEAST
biological_process	GO:0007535	donor selection	1	6	0.166667	0.6956	0.70413	1	1	FDO1_YEAST
biological_process	GO:0033567	DNA replication, Okazaki fragment processing	1	3	0.333333	0.978696	0.156102	1	1	DNA2_YEAST
biological_process	GO:0006624	vacuolar protein processing	1	8	0.125	0.552274	0.802916	1	1	VPS41_YEAST
biological_process	GO:0015677	copper ion import	1	11	0.0909091	0.372727	0.892889	1	1	FRE1_YEAST
biological_process	GO:0000105	histidine biosynthetic process	1	9	0.111111	0.427093	0.868742	1	1	HIS2_YEAST
biological_process	GO:0072344	rescue of stalled ribosome	1	11	0.0909091	0.372727	0.892889	1	1	LTN1_YEAST
biological_process	GO:0051300	spindle pole body organization	1	4	0.25	0.596407	0.58157	1	1	HCM1_YEAST
biological_process	GO:0008299	isoprenoid biosynthetic process	1	7	0.142857	0.260795	0.90534	1	1	GGPPS_YEAST
biological_process	GO:0000460	maturation of 5.8S rRNA	1	9	0.111111	0.113496	0.933761	1	1	LAS1_YEAST
biological_process	GO:0044255	cellular lipid metabolic process	1	14	0.0714286	0.00316455	0.998081	0.606	1	ROG1_YEAST
biological_process	GO:0034503	protein localization to nucleolar rDNA repeats	1	5	0.2	0.77051	0.637508	1	1	CSM1_YEAST
biological_process	GO:0006108	malate metabolic process	1	5	0.2	0.77051	0.637508	1	1	FUMH_YEAST
biological_process	GO:0009313	oligosaccharide catabolic process	1	8	0.125	0.753386	0.488871	1	1	MAN1_YEAST
biological_process	GO:0005987	sucrose catabolic process	1	8	0.125	0.552274	0.802916	1	1	INV2_YEAST
biological_process	GO:0034221	fungal-type cell wall chitin biosynthetic process	1	16	0.0625	0.178613	0.961266	1	1	BCH1_YEAST
biological_process	GO:0043066	negative regulation of apoptotic process	1	5	0.2	0.92033	0.3044	1	1	FYV10_YEAST
biological_process	GO:0010688	negative regulation of ribosomal protein gene transcription by RNA polymerase II	1	2	0.5	0.843898	0.555904	1	1	FHL1_YEAST
biological_process	GO:0090156	cellular sphingolipid homeostasis	1	7	0.142857	0.622198	0.758518	1	1	VPS52_YEAST
biological_process	GO:0010607	negative regulation of cytoplasmic mRNA processing body assembly	1	4	0.25	0.843898	0.555904	1	1	NOT1_YEAST
biological_process	GO:0009085	lysine biosynthetic process	1	3	0.333333	0.241974	0.941811	1	1	LYS14_YEAST
biological_process	GO:0006572	tyrosine catabolic process	1	2	0.5	0.911297	0.455954	1	1	ARO10_YEAST
biological_process	GO:0006414	translational elongation	1	14	0.0714286	0.0915006	0.960997	1	1	EF1G1_YEAST
biological_process	GO:0034551	mitochondrial respiratory chain complex III assembly	1	10	0.1	0.427093	0.868742	1	1	CBP4_YEAST
biological_process	GO:0035999	tetrahydrofolate interconversion	1	7	0.142857	0.622198	0.758518	1	1	MTHR1_YEAST
biological_process	GO:0006491	N-glycan processing	1	8	0.125	0.552274	0.802916	1	1	MNL2_YEAST
biological_process	GO:0070933	histone H4 deacetylation	1	4	0.25	0.77051	0.637508	1	1	HOS1_YEAST
biological_process	GO:0001731	formation of translation preinitiation complex	1	13	0.0769231	0.528383	0.705512	1	1	PAT1_YEAST
biological_process	GO:0001678	cellular glucose homeostasis	1	5	0.2	0.776224	0.427302	1	1	HXKB_YEAST
biological_process	GO:0032445	fructose import	1	2	0.5	0.966316	0.333537	1	1	HXKB_YEAST
biological_process	GO:0046323	glucose import	1	3	0.333333	0.911297	0.455954	1	1	HXKB_YEAST
biological_process	GO:2001234	negative regulation of apoptotic signaling pathway	1	1	1	1	0.18361	1	1	HXKB_YEAST
biological_process	GO:0046015	regulation of transcription by glucose	1	1	1	0.99579	0.0200115	1	1	HXKB_YEAST
biological_process	GO:0006190	inosine salvage	1	1	1	1	0.18361	1	1	ISN1_YEAST
biological_process	GO:0016226	iron-sulfur cluster assembly	1	22	0.0454545	0.136098	0.958801	1	1	NAR1_YEAST
biological_process	GO:0106035	protein maturation by [4Fe-4S] cluster transfer	1	11	0.0909091	0.372727	0.892889	1	1	JAC1_YEAST
biological_process	GO:0097428	protein maturation by iron-sulfur cluster transfer	1	9	0.111111	0.208174	0.952524	1	1	JAC1_YEAST
biological_process	GO:0045898	regulation of RNA polymerase II transcription preinitiation complex assembly	1	2	0.5	0.511129	0.758026	1	1	MOT1_YEAST
biological_process	GO:0000917	division septum assembly	1	9	0.111111	0.581342	0.632328	1	1	DBF20_YEAST
biological_process	GO:0006172	ADP biosynthetic process	1	2	0.5	0.966316	0.333537	1	1	KAD2_YEAST
biological_process	GO:0046033	AMP metabolic process	1	3	0.333333	0.552274	0.802916	1	1	KAD2_YEAST
biological_process	GO:0090139	mitochondrial DNA packaging	1	1	1	1	0.18361	1	1	ABF2_YEAST
biological_process	GO:0032974	amino acid transmembrane export from vacuole	1	4	0.25	0.843898	0.555904	1	1	AVT3_YEAST
biological_process	GO:0055088	lipid homeostasis	1	16	0.0625	0.105424	0.96303	1	1	APQ12_YEAST
biological_process	GO:1902543	negative regulation of protein localization to mitotic spindle pole body	1	1	1	1	0.18361	1	1	BUB2_YEAST
biological_process	GO:0031030	negative regulation of septation initiation signaling	1	5	0.2	0.77051	0.637508	1	1	BUB2_YEAST
biological_process	GO:2001043	positive regulation of septum digestion after cytokinesis	1	1	1	1	0.18361	1	1	ACE2_YEAST
biological_process	GO:1905786	positive regulation of anaphase-promoting complex-dependent catabolic process	1	3	0.333333	0.911297	0.455954	1	1	CDC20_YEAST
biological_process	GO:1904668	positive regulation of ubiquitin protein ligase activity	1	4	0.25	0.843898	0.555904	1	1	CDC20_YEAST
biological_process	GO:0071432	peptide mating pheromone maturation involved in positive regulation of conjugation with cellular fusion	1	5	0.2	0.77051	0.637508	1	1	RCE1_YEAST
biological_process	GO:0006474	N-terminal protein amino acid acetylation	1	8	0.125	0.427093	0.868742	1	1	NAA35_YEAST
biological_process	GO:0015793	glycerol transport	1	5	0.2	0.622198	0.758518	1	1	STL1_YEAST
biological_process	GO:0006526	arginine biosynthetic process	1	9	0.111111	0.372727	0.892889	1	1	CARA_YEAST
biological_process	GO:0015937	coenzyme A biosynthetic process	1	7	0.142857	0.622198	0.758518	1	1	SIS2_YEAST
biological_process	GO:0106034	protein maturation by [2Fe-2S] cluster transfer	1	4	0.25	0.843898	0.555904	1	1	JAC1_YEAST
biological_process	GO:0030307	positive regulation of cell growth	1	4	0.25	0.708926	0.538321	1	1	KOG1_YEAST
biological_process	GO:0065003	protein-containing complex assembly	1	9	0.111111	0.658314	0.383822	1	1	SP110_YEAST
biological_process	GO:0045041	protein import into mitochondrial intermembrane space	1	8	0.125	0.552274	0.802916	1	1	MIC60_YEAST
biological_process	GO:0006824	cobalt ion transport	1	2	0.5	0.966316	0.333537	1	1	SMF2_YEAST
biological_process	GO:0001732	formation of cytoplasmic translation initiation complex	1	10	0.1	0.427093	0.868742	1	1	EIF3A_YEAST
biological_process	GO:0009757	hexose mediated signaling	1	2	0.5	0.836452	0.383162	1	1	GPA2_YEAST
biological_process	GO:0006654	phosphatidic acid biosynthetic process	1	8	0.125	0.552274	0.802916	1	1	SPO14_YEAST
biological_process	GO:0046705	CDP biosynthetic process	1	1	1	1	0.18361	1	1	KCY_YEAST
biological_process	GO:0006225	UDP biosynthetic process	1	1	1	1	0.18361	1	1	KCY_YEAST
biological_process	GO:0032366	intracellular sterol transport	1	9	0.111111	0.487025	0.839159	1	1	YSP2_YEAST
biological_process	GO:0006275	regulation of DNA replication	1	3	0.333333	0.99276	0.0159182	1	1	DIA2_YEAST
biological_process	GO:0043577	chemotropism	1	4	0.25	0.843898	0.555904	1	1	CDC24_YEAST
biological_process	GO:0040001	establishment of mitotic spindle localization	1	4	0.25	0.845081	0.33646	1	1	DYHC_YEAST
biological_process	GO:0006633	fatty acid biosynthetic process	1	9	0.111111	0.242196	0.89682	1	1	FABG_YEAST
biological_process	GO:0006621	protein retention in ER lumen	1	10	0.1	0.427093	0.868742	1	1	EPS1_YEAST
biological_process	GO:0032049	cardiolipin biosynthetic process	1	4	0.25	0.843898	0.555904	1	1	PGPS1_YEAST
biological_process	GO:0006015	5-phosphoribose 1-diphosphate biosynthetic process	1	5	0.2	0.77051	0.637508	1	1	KPR5_YEAST
biological_process	GO:0009156	ribonucleoside monophosphate biosynthetic process	1	5	0.2	0.00501619	0.999466	0.767	1	KPR5_YEAST
biological_process	GO:0032888	regulation of mitotic spindle elongation	1	3	0.333333	0.911297	0.455954	1	1	KIP3_YEAST
biological_process	GO:0007006	mitochondrial membrane organization	1	4	0.25	0.167446	0.910955	1	1	MGM1_YEAST
biological_process	GO:0044182	filamentous growth of a population of unicellular organisms	1	2	0.5	0.939635	0.0945596	1	1	FIG2_YEAST
biological_process	GO:0009299	mRNA transcription	1	2	0.5	0.77051	0.637508	1	1	HST3_YEAST
biological_process	GO:0046459	short-chain fatty acid metabolic process	1	2	0.5	0.92033	0.3044	1	1	HST3_YEAST
biological_process	GO:0090266	regulation of mitotic cell cycle spindle assembly checkpoint	1	3	0.333333	0.879107	0.377802	1	1	2ABA_YEAST
biological_process	GO:0070681	glutaminyl-tRNAGln biosynthesis via transamidation	1	3	0.333333	0.911297	0.455954	1	1	GATB_YEAST
biological_process	GO:2001125	negative regulation of translational frameshifting	1	2	0.5	0.966316	0.333537	1	1	OAZ_YEAST
biological_process	GO:0006497	protein lipidation	1	6	0.166667	0.0390027	0.986771	1	1	HSV2_YEAST
biological_process	GO:1900152	negative regulation of nuclear-transcribed mRNA catabolic process, deadenylation-dependent decay	1	3	0.333333	0.911297	0.455954	1	1	NAB2_YEAST
biological_process	GO:0060303	regulation of nucleosome density	1	6	0.166667	0.6956	0.70413	1	1	CHD1_YEAST
biological_process	GO:0045050	protein insertion into ER membrane by stop-transfer membrane-anchor sequence	1	7	0.142857	0.622198	0.758518	1	1	EMC4_YEAST
biological_process	GO:0032467	positive regulation of cytokinesis	1	2	0.5	0.726753	0.572907	1	1	EDE1_YEAST
biological_process	GO:0045901	positive regulation of translational elongation	1	4	0.25	0.843898	0.555904	1	1	WHI3_YEAST
biological_process	GO:0045337	farnesyl diphosphate biosynthetic process	1	3	0.333333	0.6956	0.70413	1	1	GGPPS_YEAST
biological_process	GO:0033384	geranyl diphosphate biosynthetic process	1	2	0.5	0.966316	0.333537	1	1	GGPPS_YEAST
biological_process	GO:0000338	protein deneddylation	1	6	0.166667	0.6956	0.70413	1	1	CSI1_YEAST
biological_process	GO:0051987	positive regulation of attachment of spindle microtubules to kinetochore	1	10	0.1	0.372727	0.892889	1	1	DAM1_YEAST
biological_process	GO:0000709	meiotic joint molecule formation	1	5	0.2	0.92033	0.3044	1	1	RAD51_YEAST
biological_process	GO:0002188	translation reinitiation	1	5	0.2	0.77051	0.637508	1	1	EIF3A_YEAST
biological_process	GO:0006750	glutathione biosynthetic process	1	3	0.333333	0.911297	0.455954	1	1	MET16_YEAST
biological_process	GO:0019679	propionate metabolic process, methylcitrate cycle	1	2	0.5	0.966316	0.333537	1	1	PRPD_YEAST
biological_process	GO:0034354	'de novo' NAD biosynthetic process from tryptophan	1	6	0.166667	0.6956	0.70413	1	1	KMO_YEAST
biological_process	GO:0043420	anthranilate metabolic process	1	3	0.333333	0.911297	0.455954	1	1	KMO_YEAST
biological_process	GO:0019805	quinolinate biosynthetic process	1	3	0.333333	0.911297	0.455954	1	1	KMO_YEAST
biological_process	GO:0016125	sterol metabolic process	1	12	0.0833333	0.0651111	0.973705	1	1	YEH1_YEAST
biological_process	GO:0006828	manganese ion transport	1	6	0.166667	0.622198	0.758518	1	1	SMF2_YEAST
biological_process	GO:0005980	glycogen catabolic process	1	3	0.333333	0.879107	0.377802	1	1	GDE_YEAST
biological_process	GO:0061640	cytoskeleton-dependent cytokinesis	1	7	0.142857	0.987968	0.0228627	1	1	CDC3_YEAST
biological_process	GO:0061395	positive regulation of transcription from RNA polymerase II promoter in response to arsenic-containing substance	1	4	0.25	0.843898	0.555904	1	1	AP1_YEAST
biological_process	GO:0000256	allantoin catabolic process	1	6	0.166667	0.622198	0.758518	1	1	ALLA_YEAST
biological_process	GO:0006144	purine nucleobase metabolic process	1	7	0.142857	0.0803892	0.986008	1	1	ALLA_YEAST
biological_process	GO:0051096	positive regulation of helicase activity	1	4	0.25	0.843898	0.555904	1	1	MSH3_YEAST
biological_process	GO:0000743	nuclear migration involved in conjugation with cellular fusion	1	6	0.166667	0.6956	0.70413	1	1	KAR3_YEAST
biological_process	GO:2000678	negative regulation of transcription regulatory region DNA binding	1	2	0.5	0.966316	0.333537	1	1	GLRX4_YEAST
biological_process	GO:0031065	positive regulation of histone deacetylation	1	3	0.333333	0.911297	0.455954	1	1	GLRX4_YEAST
biological_process	GO:0038083	peptidyl-tyrosine autophosphorylation	1	1	1	1	0.18361	1	1	HRR25_YEAST
biological_process	GO:0018108	peptidyl-tyrosine phosphorylation	1	1	1	1	0.18361	1	1	HRR25_YEAST
biological_process	GO:0106214	regulation of vesicle fusion with Golgi apparatus	1	1	1	1	0.18361	1	1	HRR25_YEAST
biological_process	GO:0000707	meiotic DNA recombinase assembly	1	4	0.25	0.843898	0.555904	1	1	RAD57_YEAST
biological_process	GO:0032186	cellular bud neck septin ring organization	1	9	0.111111	0.487025	0.839159	1	1	2A5D_YEAST
biological_process	GO:0045910	negative regulation of DNA recombination	1	8	0.125	0.461679	0.791826	1	1	SRS2_YEAST
biological_process	GO:0034729	histone H3-K79 methylation	1	5	0.2	0.6956	0.70413	1	1	SUS1_YEAST
biological_process	GO:2000819	regulation of nucleotide-excision repair	1	1	1	0.552274	0.802916	1	1	IXR1_YEAST
biological_process	GO:0090069	regulation of ribosome biogenesis	1	1	1	1	0.0336838	1	1	IXR1_YEAST
biological_process	GO:0072718	response to cisplatin	1	1	1	1	0.18361	1	1	IXR1_YEAST
biological_process	GO:0060188	regulation of protein desumoylation	1	4	0.25	0.843898	0.555904	1	1	IMB1_YEAST
biological_process	GO:0016577	histone demethylation	1	4	0.25	0.843898	0.555904	1	1	GIS1_YEAST
biological_process	GO:0070189	kynurenine metabolic process	1	1	1	0.6956	0.70413	1	1	KMO_YEAST
biological_process	GO:0042994	cytoplasmic sequestering of transcription factor	1	2	0.5	0.966316	0.333537	1	1	URE2_YEAST
biological_process	GO:0010942	positive regulation of cell death	1	1	1	0.77051	0.637508	1	1	IF4F1_YEAST
biological_process	GO:1900103	positive regulation of endoplasmic reticulum unfolded protein response	1	3	0.333333	0.995174	0.0460215	1	1	IF4F1_YEAST
biological_process	GO:0032268	regulation of cellular protein metabolic process	1	1	1	0.67233	0.380206	1	1	IF4F1_YEAST
biological_process	GO:0071248	cellular response to metal ion	1	1	1	0.92033	0.3044	1	1	IRA2_YEAST
biological_process	GO:0090606	single-species surface biofilm formation	1	3	0.333333	0.911297	0.455954	1	1	SNF1_YEAST
biological_process	GO:0006857	oligopeptide transport	1	3	0.333333	0.671742	0.627273	1	1	OPT1_YEAST
biological_process	GO:0009411	response to UV	1	6	0.166667	0.563041	0.719575	1	1	RAD16_YEAST
biological_process	GO:0007188	adenylate cyclase-modulating G protein-coupled receptor signaling pathway	1	4	0.25	0.957666	0.168029	1	1	GPA2_YEAST
biological_process	GO:0110136	protein-RNA complex remodeling	1	3	0.333333	0.911297	0.455954	1	1	MDN1_YEAST
biological_process	GO:0048203	vesicle targeting, trans-Golgi to endosome	1	5	0.2	0.77051	0.637508	1	1	VPS10_YEAST
biological_process	GO:0006975	DNA damage induced protein phosphorylation	1	2	0.5	0.966316	0.333537	1	1	ATM_YEAST
biological_process	GO:0016572	histone phosphorylation	1	2	0.5	0.953979	0.22949	1	1	ATM_YEAST
biological_process	GO:1901857	positive regulation of cellular respiration	1	3	0.333333	0.911297	0.455954	1	1	RAD53_YEAST
biological_process	GO:0071629	cytoplasm protein quality control by the ubiquitin-proteasome system	1	10	0.1	0.427093	0.868742	1	1	UBR1_YEAST
biological_process	GO:0019433	triglyceride catabolic process	1	7	0.142857	0.552274	0.802916	1	1	TGL4_YEAST
biological_process	GO:0090297	positive regulation of mitochondrial DNA replication	1	3	0.333333	0.911297	0.455954	1	1	MHR1_YEAST
biological_process	GO:0018279	protein N-linked glycosylation via asparagine	1	6	0.166667	0.6956	0.70413	1	1	OST3_YEAST
biological_process	GO:0071528	tRNA re-export from nucleus	1	2	0.5	0.966316	0.333537	1	1	XPOT_YEAST
biological_process	GO:0042176	regulation of protein catabolic process	1	5	0.2	0.796066	0.378958	1	1	PIB1_YEAST
biological_process	GO:2000200	regulation of ribosomal subunit export from nucleus	1	2	0.5	0.911297	0.455954	1	1	MDN1_YEAST
biological_process	GO:0006530	asparagine catabolic process	1	6	0.166667	0.6956	0.70413	1	1	ASPG1_YEAST
biological_process	GO:0140255	regulation of cellular response to phosphate starvation	1	1	1	1	0.18361	1	1	ATG11_YEAST
biological_process	GO:0009437	carnitine metabolic process	1	3	0.333333	0.843898	0.555904	1	1	CACP_YEAST
biological_process	GO:0006037	cell wall chitin metabolic process	1	3	0.333333	0.444143	0.769763	1	1	CRH2_YEAST
biological_process	GO:0007017	microtubule-based process	1	6	0.166667	0.955866	0.0696907	1	1	VIK1_YEAST
biological_process	GO:1901925	negative regulation of protein import into nucleus during spindle assembly checkpoint	1	4	0.25	0.843898	0.555904	1	1	MAD1_YEAST
biological_process	GO:0007584	response to nutrient	1	4	0.25	0.9597	0.076118	1	1	BRO1_YEAST
biological_process	GO:0006071	glycerol metabolic process	1	6	0.166667	0.241974	0.941811	1	1	TCO89_YEAST
biological_process	GO:0006266	DNA ligation	1	1	1	0.978696	0.156102	1	1	DNLI1_YEAST
biological_process	GO:1903461	Okazaki fragment processing involved in mitotic DNA replication	1	1	1	1	0.18361	1	1	DNLI1_YEAST
biological_process	GO:0006552	leucine catabolic process	1	2	0.5	0.911297	0.455954	1	1	ARO10_YEAST
biological_process	GO:0006538	glutamate catabolic process	1	2	0.5	0.911297	0.455954	1	1	DHE2_YEAST
biological_process	GO:0019551	glutamate catabolic process to 2-oxoglutarate	1	1	1	1	0.18361	1	1	DHE2_YEAST
biological_process	GO:0034498	early endosome to Golgi transport	1	11	0.0909091	0.372727	0.892889	1	1	SNX4_YEAST
biological_process	GO:0043631	RNA polyadenylation	1	3	0.333333	0.993766	0.0177915	1	1	FIR1_YEAST
biological_process	GO:0044774	mitotic DNA integrity checkpoint signaling	1	5	0.2	0.916122	0.171025	1	1	MAD1_YEAST
biological_process	GO:0051228	mitotic spindle disassembly	1	4	0.25	0.843898	0.555904	1	1	KIP3_YEAST
biological_process	GO:0006673	inositol phosphoceramide metabolic process	1	5	0.2	0.552274	0.802916	1	1	KEI1_YEAST
biological_process	GO:0030041	actin filament polymerization	1	3	0.333333	0.981907	0.0435125	1	1	LAS17_YEAST
biological_process	GO:0032233	positive regulation of actin filament bundle assembly	1	1	1	0.6956	0.70413	1	1	LAS17_YEAST
biological_process	GO:0097552	mitochondrial double-strand break repair via homologous recombination	1	4	0.25	0.843898	0.555904	1	1	RAD50_YEAST
biological_process	GO:1900191	negative regulation of single-species biofilm formation	1	1	1	1	0.18361	1	1	CYC8_YEAST
biological_process	GO:0030042	actin filament depolymerization	1	4	0.25	0.947444	0.163548	1	1	TWF1_YEAST
biological_process	GO:0051014	actin filament severing	1	3	0.333333	0.843898	0.555904	1	1	TWF1_YEAST
biological_process	GO:0030836	positive regulation of actin filament depolymerization	1	3	0.333333	0.953979	0.22949	1	1	TWF1_YEAST
biological_process	GO:0090141	positive regulation of mitochondrial fission	1	3	0.333333	0.911297	0.455954	1	1	MDV1_YEAST
biological_process	GO:0030833	regulation of actin filament polymerization	1	7	0.142857	0.981907	0.0435125	1	1	ARPC5_YEAST
biological_process	GO:0045761	regulation of adenylate cyclase activity	1	2	0.5	0.77051	0.637508	1	1	IRA1_YEAST
biological_process	GO:1903457	lactate catabolic process	1	2	0.5	0.966316	0.333537	1	1	DLD2_YEAST
biological_process	GO:0071712	ER-associated misfolded protein catabolic process	1	7	0.142857	0.622198	0.758518	1	1	PMT1_YEAST
biological_process	GO:0006515	protein quality control for misfolded or incompletely synthesized proteins	1	13	0.0769231	0.152655	0.942042	1	1	MCA1_YEAST
biological_process	GO:0080182	histone H3-K4 trimethylation	1	5	0.2	0.77051	0.637508	1	1	SET1_YEAST
biological_process	GO:0006039	cell wall chitin catabolic process	1	1	1	1	0.18361	1	1	CHS5_YEAST
biological_process	GO:1990258	histone glutamine methylation	1	2	0.5	0.966316	0.333537	1	1	YM8F_YEAST
biological_process	GO:0000348	mRNA branch site recognition	1	3	0.333333	0.911297	0.455954	1	1	MUD2_YEAST
biological_process	GO:0090337	regulation of formin-nucleated actin cable assembly	1	6	0.166667	0.372727	0.892889	1	1	KEL1_YEAST
biological_process	GO:0032515	negative regulation of phosphoprotein phosphatase activity	1	3	0.333333	0.6956	0.70413	1	1	SIS2_YEAST
biological_process	GO:0090419	negative regulation of transcription involved in G2/M transition of mitotic cell cycle	1	2	0.5	0.966316	0.333537	1	1	FKH2_YEAST
biological_process	GO:1903468	positive regulation of DNA replication initiation	1	3	0.333333	0.911297	0.455954	1	1	FKH2_YEAST
biological_process	GO:0042128	nitrate assimilation	1	3	0.333333	0.911297	0.455954	1	1	URE2_YEAST
biological_process	GO:0001080	nitrogen catabolite activation of transcription from RNA polymerase II promoter	1	6	0.166667	0.6956	0.70413	1	1	DAL81_YEAST
biological_process	GO:1900050	negative regulation of histone exchange	1	2	0.5	0.966316	0.333537	1	1	CHD1_YEAST
biological_process	GO:0001178	regulation of transcriptional start site selection at RNA polymerase II promoter	1	3	0.333333	0.911297	0.455954	1	1	CHD1_YEAST
biological_process	GO:0061402	positive regulation of transcription from RNA polymerase II promoter in response to acidic pH	1	3	0.333333	0.911297	0.455954	1	1	HAA1_YEAST
biological_process	GO:0140021	mitochondrial ADP transmembrane transport	1	5	0.2	0.77051	0.637508	1	1	ADT1_YEAST
biological_process	GO:1990544	mitochondrial ATP transmembrane transport	1	5	0.2	0.77051	0.637508	1	1	ADT1_YEAST
biological_process	GO:0006525	arginine metabolic process	1	4	0.25	0.415096	0.821387	1	1	MCM1_YEAST
biological_process	GO:0032446	protein modification by small protein conjugation	1	7	0.142857	0.399754	0.677077	1	1	UBA1_YEAST
biological_process	GO:0046713	borate transport	1	2	0.5	0.911297	0.455954	1	1	ATR1_YEAST
biological_process	GO:1990344	secondary cell septum biogenesis	1	3	0.333333	0.843898	0.555904	1	1	CYK3_YEAST
biological_process	GO:0071211	protein targeting to vacuole involved in autophagy	1	3	0.333333	0.911297	0.455954	1	1	ATG13_YEAST
biological_process	GO:1904825	protein localization to microtubule plus-end	1	1	1	1	0.18361	1	1	BIM1_YEAST
biological_process	GO:0031110	regulation of microtubule polymerization or depolymerization	1	1	1	0.880782	0.261118	1	1	BIM1_YEAST
biological_process	GO:0090070	positive regulation of ribosome biogenesis	1	1	1	1	0.18361	1	1	DPO5_YEAST
biological_process	GO:0045048	protein insertion into ER membrane	1	6	0.166667	0.563041	0.719575	1	1	GET1_YEAST
biological_process	GO:1904828	positive regulation of hydrogen sulfide biosynthetic process	1	2	0.5	0.966316	0.333537	1	1	SCH9_YEAST
biological_process	GO:0045471	response to ethanol	1	4	0.25	0.780644	0.512975	1	1	ETP1_YEAST
biological_process	GO:1901525	negative regulation of mitophagy	1	4	0.25	0.843898	0.555904	1	1	BRE5_YEAST
biological_process	GO:2000156	regulation of retrograde vesicle-mediated transport, Golgi to ER	1	1	1	1	0.18361	1	1	BRE5_YEAST
biological_process	GO:0048311	mitochondrion distribution	1	1	1	0.785469	0.37506	1	1	DML1_YEAST
biological_process	GO:1904152	regulation of retrograde protein transport, ER to cytosol	1	1	1	1	0.18361	1	1	DFM1_YEAST
biological_process	GO:0030071	regulation of mitotic metaphase/anaphase transition	1	6	0.166667	0.966619	0.0700853	1	1	SDS24_YEAST
biological_process	GO:0120174	stress-induced homeostatically regulated protein degradation pathway	1	5	0.2	0.77051	0.637508	1	1	UBR1_YEAST
biological_process	GO:0006751	glutathione catabolic process	1	5	0.2	0.77051	0.637508	1	1	DUG2_YEAST
biological_process	GO:0015940	pantothenate biosynthetic process	1	10	0.1	0.427093	0.868742	1	1	PANC_YEAST
biological_process	GO:0048268	clathrin coat assembly	1	4	0.25	0.843898	0.555904	1	1	AP18A_YEAST
biological_process	GO:0010674	negative regulation of transcription from RNA polymerase II promoter involved in meiotic cell cycle	1	4	0.25	0.843898	0.555904	1	1	UME6_YEAST
biological_process	GO:0071988	protein localization to spindle pole body	1	3	0.333333	0.986468	0.0653758	1	1	KIN4_YEAST
biological_process	GO:0031115	negative regulation of microtubule polymerization	1	2	0.5	0.966316	0.333537	1	1	KIP3_YEAST
biological_process	GO:0070462	plus-end specific microtubule depolymerization	1	1	1	1	0.18361	1	1	KIP3_YEAST
biological_process	GO:0061912	selective autophagy	1	5	0.2	0.848633	0.254935	1	1	SNX4_YEAST
biological_process	GO:1901720	negative regulation of NMS complex assembly	1	1	1	1	0.18361	1	1	CENPT_YEAST
biological_process	GO:0032065	maintenance of protein location in cell cortex	1	2	0.5	0.966316	0.333537	1	1	NUM1_YEAST
biological_process	GO:1901717	positive regulation of gamma-aminobutyric acid catabolic process	1	1	1	1	0.18361	1	1	DAL81_YEAST
biological_process	GO:1901714	positive regulation of urea catabolic process	1	1	1	1	0.18361	1	1	DAL81_YEAST
biological_process	GO:0070814	hydrogen sulfide biosynthetic process	1	6	0.166667	0.831971	0.447726	1	1	MET16_YEAST
biological_process	GO:0010606	positive regulation of cytoplasmic mRNA processing body assembly	1	4	0.25	0.843898	0.555904	1	1	PKH1_YEAST
biological_process	GO:0006106	fumarate metabolic process	1	1	1	1	0.0336838	1	1	FUMH_YEAST
biological_process	GO:0019568	arabinose catabolic process	1	4	0.25	0.77051	0.637508	1	1	GRE3_YEAST
biological_process	GO:0042843	D-xylose catabolic process	1	4	0.25	0.843898	0.555904	1	1	GRE3_YEAST
biological_process	GO:0006221	pyrimidine nucleotide biosynthetic process	1	6	0.166667	0.230237	0.919611	1	1	CARA_YEAST
biological_process	GO:0006113	fermentation	1	3	0.333333	0.461679	0.791826	1	1	CSF1_YEAST
biological_process	GO:0051604	protein maturation	1	6	0.166667	0.000959504	0.999707	0.237	1	CSF1_YEAST
biological_process	GO:1902499	positive regulation of protein autoubiquitination	1	7	0.142857	0.622198	0.758518	1	1	USA1_YEAST
biological_process	GO:0019379	sulfate assimilation, phosphoadenylyl sulfate reduction by phosphoadenylyl-sulfate reductase (thioredoxin)	1	3	0.333333	0.911297	0.455954	1	1	MET16_YEAST
biological_process	GO:1990456	mitochondrion-endoplasmic reticulum membrane tethering	1	5	0.2	0.77051	0.637508	1	1	MDM34_YEAST
biological_process	GO:0097466	ubiquitin-dependent glycoprotein ERAD pathway	1	4	0.25	0.77051	0.637508	1	1	RAD23_YEAST
biological_process	GO:0006850	mitochondrial pyruvate transmembrane transport	1	4	0.25	0.843898	0.555904	1	1	YIA6_YEAST
biological_process	GO:0034214	protein hexamerization	1	4	0.25	0.843898	0.555904	1	1	MCM4_YEAST
biological_process	GO:0097623	potassium ion export across plasma membrane	1	1	1	1	0.18361	1	1	NAH1_YEAST
biological_process	GO:0036376	sodium ion export across plasma membrane	1	1	1	1	0.18361	1	1	NAH1_YEAST
biological_process	GO:0031398	positive regulation of protein ubiquitination	1	3	0.333333	0.66354	0.584904	1	1	BSD2_YEAST
biological_process	GO:0051205	protein insertion into membrane	1	2	0.5	0.102156	0.95564	1	1	COX18_YEAST
biological_process	GO:1903450	regulation of G1 to G0 transition	1	3	0.333333	0.622198	0.758518	1	1	RLM1_YEAST
biological_process	GO:0010791	DNA double-strand break processing involved in repair via synthesis-dependent strand annealing	1	2	0.5	0.966316	0.333537	1	1	COM1_YEAST
biological_process	GO:0035306	positive regulation of dephosphorylation	1	1	1	0.726753	0.572907	1	1	COM1_YEAST
biological_process	GO:0031589	cell-substrate adhesion	1	2	0.5	0.986468	0.0653758	1	1	FLO9_YEAST
biological_process	GO:0042256	mature ribosome assembly	1	6	0.166667	0.6956	0.70413	1	1	RIA1_YEAST
biological_process	GO:0050849	negative regulation of calcium-mediated signaling	1	2	0.5	0.966316	0.333537	1	1	PHO80_YEAST
biological_process	GO:0045936	negative regulation of phosphate metabolic process	1	2	0.5	0.164202	0.928461	1	1	PHO80_YEAST
biological_process	GO:0045003	double-strand break repair via synthesis-dependent strand annealing	1	3	0.333333	0.942914	0.154919	1	1	RAD54_YEAST
biological_process	GO:0010922	positive regulation of phosphatase activity	1	2	0.5	0.622198	0.758518	1	1	KES1_YEAST
biological_process	GO:0042546	cell wall biogenesis	1	4	0.25	0.0182573	0.990979	0.999	1	SMI1_YEAST
biological_process	GO:0090615	mitochondrial mRNA processing	1	8	0.125	0.552274	0.802916	1	1	MNE1_YEAST
biological_process	GO:0070202	regulation of establishment of protein localization to chromosome	1	3	0.333333	0.911297	0.455954	1	1	MED16_YEAST
biological_process	GO:0032527	protein exit from endoplasmic reticulum	1	5	0.2	0.880782	0.261118	1	1	PMT1_YEAST
biological_process	GO:0045046	protein import into peroxisome membrane	1	2	0.5	0.966316	0.333537	1	1	PEX3_YEAST
biological_process	GO:0061987	negative regulation of transcription from RNA polymerase II promoter by glucose	1	1	1	0.964043	0.126551	1	1	MIG1_YEAST
biological_process	GO:0071805	potassium ion transmembrane transport	1	4	0.25	0.780644	0.512975	1	1	NHX1_YEAST
biological_process	GO:2000679	positive regulation of transcription regulatory region DNA binding	1	3	0.333333	0.911297	0.455954	1	1	MET28_YEAST
biological_process	GO:0006086	acetyl-CoA biosynthetic process from pyruvate	1	4	0.25	0.843898	0.555904	1	1	ODPX_YEAST
biological_process	GO:0060211	regulation of nuclear-transcribed mRNA poly(A) tail shortening	1	4	0.25	0.77051	0.637508	1	1	PKH1_YEAST
biological_process	GO:0030001	metal ion transport	1	3	0.333333	0.572729	0.591932	1	1	BSD2_YEAST
biological_process	GO:0015757	galactose transmembrane transport	1	1	1	1	0.18361	1	1	GAL2_YEAST
biological_process	GO:0090305	nucleic acid phosphodiester bond hydrolysis	1	7	0.142857	0.682957	0.390702	1	1	RAD50_YEAST
biological_process	GO:1905524	negative regulation of protein autoubiquitination	1	2	0.5	0.966316	0.333537	1	1	HRD3_YEAST
biological_process	GO:0061399	positive regulation of transcription from RNA polymerase II promoter in response to cobalt ion	1	1	1	1	0.18361	1	1	MGA2_YEAST
biological_process	GO:0061419	positive regulation of transcription from RNA polymerase II promoter in response to hypoxia	1	1	1	1	0.18361	1	1	MGA2_YEAST
biological_process	GO:0035652	clathrin-coated vesicle cargo loading	1	1	1	1	0.18361	1	1	MIL1_YEAST
biological_process	GO:0000713	meiotic heteroduplex formation	1	1	1	1	0.18361	1	1	MLH1_YEAST
biological_process	GO:0071406	cellular response to methylmercury	1	4	0.25	0.843898	0.555904	1	1	UFO1_YEAST
biological_process	GO:0010973	positive regulation of division septum assembly	1	3	0.333333	0.911297	0.455954	1	1	PACC_YEAST
biological_process	GO:0035024	negative regulation of Rho protein signal transduction	1	5	0.2	0.77051	0.637508	1	1	BEM2_YEAST
biological_process	GO:0015908	fatty acid transport	1	4	0.25	0.726753	0.572907	1	1	PRY2_YEAST
biological_process	GO:0061635	regulation of protein complex stability	1	2	0.5	0.966316	0.333537	1	1	DEF1_YEAST
biological_process	GO:2001278	positive regulation of leucine biosynthetic process	1	1	1	1	0.18361	1	1	LEUR_YEAST
biological_process	GO:1902975	mitotic DNA replication initiation	1	5	0.2	0.934624	0.219356	1	1	MCM4_YEAST
biological_process	GO:0043629	ncRNA polyadenylation	1	5	0.2	0.6956	0.70413	1	1	AIR1_YEAST
biological_process	GO:0071031	nuclear mRNA surveillance of mRNA 3'-end processing	1	5	0.2	0.77051	0.637508	1	1	AIR1_YEAST
biological_process	GO:0000292	RNA fragment catabolic process	1	2	0.5	0.966316	0.333537	1	1	UTP18_YEAST
biological_process	GO:1990799	mitochondrial tRNA wobble position uridine thiolation	1	1	1	1	0.18361	1	1	MTU1_YEAST
biological_process	GO:0070899	mitochondrial tRNA wobble uridine modification	1	2	0.5	0.993826	0.0887032	1	1	MSS1_YEAST
biological_process	GO:0043488	regulation of mRNA stability	1	4	0.25	0.978939	0.0388321	1	1	NAB2_YEAST
biological_process	GO:0120133	negative regulation of actin cortical patch assembly	1	1	1	1	0.18361	1	1	PRK1_YEAST
biological_process	GO:0060256	regulation of flocculation	1	3	0.333333	0.978696	0.156102	1	1	RLM1_YEAST
biological_process	GO:0001172	transcription, RNA-templated	1	12	0.0833333	0.323904	0.912598	1	1	RPB1_YEAST
biological_process	GO:0071244	cellular response to carbon dioxide	1	2	0.5	0.966316	0.333537	1	1	ACA2_YEAST
biological_process	GO:0061429	positive regulation of transcription from RNA polymerase II promoter by oleic acid	1	4	0.25	0.843898	0.555904	1	1	ACA2_YEAST
biological_process	GO:0098507	polynucleotide 5' dephosphorylation	1	2	0.5	0.966316	0.333537	1	1	CET1_YEAST
biological_process	GO:0098501	obsolete polynucleotide dephosphorylation	1	1	1	1	0.18361	1	1	CET1_YEAST
biological_process	GO:0006517	protein deglycosylation	1	2	0.5	0.77051	0.637508	1	1	RAD23_YEAST
biological_process	GO:0035977	protein deglycosylation involved in glycoprotein catabolic process	1	3	0.333333	0.77051	0.637508	1	1	RAD23_YEAST
biological_process	GO:1900102	negative regulation of endoplasmic reticulum unfolded protein response	1	3	0.333333	0.911297	0.455954	1	1	VPS35_YEAST
biological_process	GO:0048313	Golgi inheritance	1	4	0.25	0.843898	0.555904	1	1	SEC8_YEAST
biological_process	GO:0006784	heme A biosynthetic process	1	3	0.333333	0.911297	0.455954	1	1	COX10_YEAST
biological_process	GO:0048034	heme O biosynthetic process	1	1	1	1	0.18361	1	1	COX10_YEAST
biological_process	GO:0070932	histone H3 deacetylation	1	3	0.333333	0.843898	0.555904	1	1	HOS1_YEAST
biological_process	GO:0045128	negative regulation of reciprocal meiotic recombination	1	3	0.333333	0.911297	0.455954	1	1	ZIP1_YEAST
biological_process	GO:0016479	negative regulation of transcription by RNA polymerase I	1	7	0.142857	0.487025	0.839159	1	1	RXT3_YEAST
biological_process	GO:0070145	mitochondrial asparaginyl-tRNA aminoacylation	1	1	1	1	0.18361	1	1	SYNM_YEAST
biological_process	GO:0030989	dynein-driven meiotic oscillatory nuclear movement	1	1	1	1	0.18361	1	1	NUM1_YEAST
biological_process	GO:0031119	tRNA pseudouridine synthesis	1	7	0.142857	0.622198	0.758518	1	1	RIB2_YEAST
biological_process	GO:0000455	enzyme-directed rRNA pseudouridine synthesis	1	6	0.166667	0.6956	0.70413	1	1	RIB2_YEAST
biological_process	GO:0001522	pseudouridine synthesis	1	3	0.333333	0.331419	0.86944	1	1	NAF1_YEAST
biological_process	GO:0032995	regulation of fungal-type cell wall biogenesis	1	1	1	1	0.18361	1	1	SMI1_YEAST
biological_process	GO:1905634	regulation of protein localization to chromatin	1	2	0.5	0.843898	0.555904	1	1	SGF73_YEAST
biological_process	GO:1904802	RITS complex assembly	1	1	1	1	0.18361	1	1	SGF73_YEAST
biological_process	GO:0031453	positive regulation of heterochromatin assembly	1	1	1	0.911297	0.455954	1	1	SIR4_YEAST
biological_process	GO:0034508	centromere complex assembly	1	3	0.333333	0.485415	0.739205	1	1	BUB1_YEAST
biological_process	GO:0070199	establishment of protein localization to chromosome	1	2	0.5	0.780644	0.512975	1	1	2A5D_YEAST
biological_process	GO:0065004	protein-DNA complex assembly	1	2	0.5	0.967882	0.0500456	1	1	SKI8_YEAST
biological_process	GO:0010947	negative regulation of meiotic joint molecule formation	1	1	1	1	0.18361	1	1	SGS1_YEAST
biological_process	GO:1901494	regulation of cysteine metabolic process	1	1	1	1	0.18361	1	1	SCH9_YEAST
biological_process	GO:0047484	regulation of response to osmotic stress	1	2	0.5	0.843898	0.555904	1	1	SCH9_YEAST
biological_process	GO:0009228	thiamine biosynthetic process	1	12	0.0833333	0.461679	0.791826	1	1	THI4_YEAST
biological_process	GO:0000493	box H/ACA snoRNP assembly	1	3	0.333333	0.911297	0.455954	1	1	NAF1_YEAST
biological_process	GO:0044648	histone H3-K4 dimethylation	1	1	1	1	0.18361	1	1	SET1_YEAST
biological_process	GO:0097692	histone H3-K4 monomethylation	1	1	1	1	0.18361	1	1	SET1_YEAST
biological_process	GO:0090241	negative regulation of histone H4 acetylation	1	1	1	1	0.18361	1	1	SET1_YEAST
biological_process	GO:1905088	positive regulation of synaptonemal complex assembly	1	1	1	1	0.18361	1	1	SET1_YEAST
biological_process	GO:2001196	positive regulation of lysine biosynthetic process via alpha-aminoadipate and saccharopine	1	1	1	1	0.18361	1	1	LYS14_YEAST
biological_process	GO:0061158	3'-UTR-mediated mRNA destabilization	1	1	1	1	0.18361	1	1	NGR1_YEAST
biological_process	GO:0043408	regulation of MAPK cascade	1	3	0.333333	0.875654	0.291074	1	1	CLA4_YEAST
biological_process	GO:0000304	response to singlet oxygen	1	3	0.333333	0.911297	0.455954	1	1	AP1_YEAST
biological_process	GO:0042262	DNA protection	1	2	0.5	0.966316	0.333537	1	1	SRS2_YEAST
biological_process	GO:1990986	DNA recombinase disassembly	1	1	1	1	0.18361	1	1	SRS2_YEAST
biological_process	GO:2000042	negative regulation of double-strand break repair via homologous recombination	1	1	1	1	0.18361	1	1	SRS2_YEAST
biological_process	GO:0090173	regulation of synaptonemal complex assembly	1	1	1	1	0.0336838	1	1	SPO22_YEAST
biological_process	GO:1990575	mitochondrial L-ornithine transmembrane transport	1	3	0.333333	0.911297	0.455954	1	1	YMC2_YEAST
biological_process	GO:0090114	COPII-coated vesicle budding	1	4	0.25	0.970305	0.0968982	1	1	SEC31_YEAST
biological_process	GO:0110120	gamma-tubulin complex localization to nuclear side of mitotic spindle pole body	1	1	1	1	0.18361	1	1	SP110_YEAST
biological_process	GO:0090063	positive regulation of microtubule nucleation	1	1	1	1	0.18361	1	1	SP110_YEAST
biological_process	GO:1902440	protein localization to mitotic spindle pole body	1	1	1	0.987627	0.0796697	1	1	SP110_YEAST
biological_process	GO:0019619	3,4-dihydroxybenzoate catabolic process	1	1	1	1	0.18361	1	1	RRAAH_YEAST
biological_process	GO:0097046	replication fork progression beyond termination site	1	2	0.5	0.966316	0.333537	1	1	RRM3_YEAST
biological_process	GO:1990734	astral microtubule anchoring at mitotic spindle pole body	1	1	1	1	0.18361	1	1	SPC72_YEAST
biological_process	GO:0110121	gamma-tubulin complex localization to cytoplasmic side of mitotic spindle pole body	1	1	1	1	0.18361	1	1	SPC72_YEAST
biological_process	GO:0006877	cellular cobalt ion homeostasis	1	1	1	1	0.18361	1	1	SMF2_YEAST
biological_process	GO:0030951	establishment or maintenance of microtubule cytoskeleton polarity	1	1	1	1	0.18361	1	1	STU2_YEAST
biological_process	GO:0010673	positive regulation of transcription from RNA polymerase II promoter involved in meiotic cell cycle	1	2	0.5	0.966316	0.333537	1	1	UME6_YEAST
biological_process	GO:0048219	inter-Golgi cisterna vesicle-mediated transport	1	1	1	1	0.18361	1	1	SEC18_YEAST
biological_process	GO:0031123	RNA 3'-end processing	1	3	0.333333	0.654262	0.450987	1	1	RNA14_YEAST
biological_process	GO:0032012	regulation of ARF protein signal transduction	1	5	0.2	0.6956	0.70413	1	1	SEC7_YEAST
biological_process	GO:0071036	nuclear polyadenylation-dependent snoRNA catabolic process	1	5	0.2	0.77051	0.637508	1	1	AIR1_YEAST
biological_process	GO:0071037	nuclear polyadenylation-dependent snRNA catabolic process	1	5	0.2	0.77051	0.637508	1	1	AIR1_YEAST
biological_process	GO:0006403	RNA localization	1	1	1	0.96918	0.0475998	1	1	MTR10_YEAST
biological_process	GO:0061015	snRNA import into nucleus	1	2	0.5	0.966316	0.333537	1	1	MTR10_YEAST
biological_process	GO:0051031	tRNA transport	1	1	1	0.964522	0.0925687	1	1	MTR10_YEAST
biological_process	GO:0060195	negative regulation of antisense RNA transcription	1	4	0.25	0.843898	0.555904	1	1	EAF3_YEAST
biological_process	GO:0071441	negative regulation of histone H3-K14 acetylation	1	2	0.5	0.966316	0.333537	1	1	CHD1_YEAST
biological_process	GO:2000616	negative regulation of histone H3-K9 acetylation	1	2	0.5	0.966316	0.333537	1	1	CHD1_YEAST
biological_process	GO:0035404	histone-serine phosphorylation	1	2	0.5	0.966316	0.333537	1	1	CLA4_YEAST
biological_process	GO:0015794	glycerol-3-phosphate transmembrane transport	1	2	0.5	0.966316	0.333537	1	1	PHO91_YEAST
biological_process	GO:0071586	CAAX-box protein processing	1	2	0.5	0.966316	0.333537	1	1	RCE1_YEAST
biological_process	GO:0000770	peptide pheromone export	1	1	1	1	0.18361	1	1	STE6_YEAST
biological_process	GO:0060258	negative regulation of filamentous growth	1	1	1	0.671742	0.627273	1	1	SSN3_YEAST
biological_process	GO:0031648	protein destabilization	1	1	1	1	0.18361	1	1	SSN3_YEAST
biological_process	GO:0042989	sequestering of actin monomers	1	2	0.5	0.966316	0.333537	1	1	TWF1_YEAST
biological_process	GO:1904876	negative regulation of DNA ligase activity	1	1	1	1	0.18361	1	1	SP382_YEAST
biological_process	GO:0032091	negative regulation of protein binding	1	1	1	1	0.18361	1	1	SP382_YEAST
biological_process	GO:0051274	beta-glucan biosynthetic process	1	1	1	0.466281	0.729948	1	1	TRS65_YEAST
biological_process	GO:0071255	Cvt vesicle assembly	1	3	0.333333	0.911297	0.455954	1	1	ATG13_YEAST
biological_process	GO:0140504	microlipophagy	1	3	0.333333	0.911297	0.455954	1	1	PIK1_YEAST
biological_process	GO:0006605	protein targeting	1	2	0.5	0.431102	0.633496	1	1	SRPR_YEAST
biological_process	GO:0140588	chromatin looping	1	3	0.333333	0.911297	0.455954	1	1	PDS5_YEAST
biological_process	GO:0010992	ubiquitin recycling	1	5	0.2	0.323904	0.912598	1	1	RFU1_YEAST
biological_process	GO:0010044	response to aluminum ion	1	1	1	1	0.18361	1	1	URE2_YEAST
biological_process	GO:0052837	thiazole biosynthetic process	1	1	1	1	0.18361	1	1	THI4_YEAST
biological_process	GO:0032048	cardiolipin metabolic process	1	7	0.142857	0.461679	0.791826	1	1	AFT1_YEAST
biological_process	GO:0071940	fungal-type cell wall assembly	1	1	1	0.299173	0.821484	1	1	SNF1_YEAST
biological_process	GO:1905261	regulation of meiotic DNA double-strand break formation involved in reciprocal meiotic recombination	1	1	1	0.911297	0.455954	1	1	SLX4_YEAST
biological_process	GO:0000432	positive regulation of transcription from RNA polymerase II promoter by glucose	1	1	1	1	0.18361	1	1	STB3_YEAST
biological_process	GO:0048210	Golgi vesicle fusion to target membrane	1	1	1	1	0.18361	1	1	VPS45_YEAST
biological_process	GO:0061504	cyclic threonylcarbamoyladenosine biosynthetic process	1	2	0.5	0.966316	0.333537	1	1	TCD2_YEAST
biological_process	GO:0000378	RNA exon ligation	1	1	1	1	0.18361	1	1	PRP16_YEAST
biological_process	GO:0016073	snRNA metabolic process	1	1	1	0.24905	0.880483	1	1	PRP16_YEAST
biological_process	GO:0040031	snRNA modification	1	1	1	0.427093	0.868742	1	1	PRP16_YEAST
biological_process	GO:0030154	cell differentiation	1	3	0.333333	0.918793	0.111796	1	1	YOX1_YEAST
biological_process	GO:0000393	spliceosomal conformational changes to generate catalytic conformation	1	1	1	0.925597	0.173562	1	1	PRP4_YEAST
biological_process	GO:0070536	protein K63-linked deubiquitination	1	1	1	1	0.18361	1	1	RFU1_YEAST
biological_process	GO:0034488	basic amino acid transmembrane export from vacuole	1	3	0.333333	0.911297	0.455954	1	1	YPQ2_YEAST
biological_process	GO:0015909	long-chain fatty acid transport	1	1	1	0.622198	0.758518	1	1	YKS7_YEAST
biological_process	GO:0019413	acetate biosynthetic process	1	4	0.25	0.843898	0.555904	1	1	TDA9_YEAST
biological_process	GO:0005993	trehalose catabolic process	1	3	0.333333	0.843898	0.555904	1	1	TREA_YEAST
biological_process	GO:0090363	regulation of proteasome core complex assembly	1	1	1	1	0.18361	1	1	UMP1_YEAST
biological_process	GO:0000389	mRNA 3'-splice site recognition	1	3	0.333333	0.911297	0.455954	1	1	PRP8_YEAST
biological_process	GO:1990549	mitochondrial NAD transmembrane transport	1	2	0.5	0.966316	0.333537	1	1	YIA6_YEAST
biological_process	GO:0035352	NAD transmembrane transport	1	2	0.5	0.966316	0.333537	1	1	YIA6_YEAST
biological_process	GO:0071596	ubiquitin-dependent protein catabolic process via the N-end rule pathway	1	4	0.25	0.843898	0.555904	1	1	UBR1_YEAST
biological_process	GO:0006642	triglyceride mobilization	1	2	0.5	0.966316	0.333537	1	1	TGL4_YEAST
biological_process	GO:0090268	activation of mitotic cell cycle spindle assembly checkpoint	1	1	1	1	0.18361	1	1	MAD1_YEAST
biological_process	GO:0019541	propionate metabolic process	1	1	1	0.843898	0.555904	1	1	PRPD_YEAST
biological_process	GO:0090089	regulation of dipeptide transport	1	2	0.5	0.966316	0.333537	1	1	UBR1_YEAST
biological_process	GO:0033674	positive regulation of kinase activity	1	3	0.333333	0.873796	0.243973	1	1	VAC14_YEAST
biological_process	GO:0070134	positive regulation of mitochondrial translational initiation	1	1	1	1	0.18361	1	1	PT309_YEAST
biological_process	GO:0045022	early endosome to late endosome transport	1	3	0.333333	0.911297	0.455954	1	1	RAV1_YEAST
biological_process	GO:0051469	vesicle fusion with vacuole	1	2	0.5	0.966316	0.333537	1	1	VPS33_YEAST
biological_process	GO:0002130	wobble position ribose methylation	1	3	0.333333	0.911297	0.455954	1	1	TR732_YEAST
biological_process	GO:0140469	GCN2-mediated signaling	1	3	0.333333	0.911297	0.455954	1	1	GCN2_YEAST
biological_process	GO:0045056	transcytosis	1	2	0.5	0.966316	0.333537	1	1	USO1_YEAST
biological_process	GO:0071554	cell wall organization or biogenesis	1	1	1	0.932208	0.089288	1	1	WHI3_YEAST
biological_process	GO:0045793	positive regulation of cell size	1	1	1	1	0.18361	1	1	WHI3_YEAST
biological_process	GO:1990166	protein localization to site of double-strand break	1	2	0.5	0.966316	0.333537	1	1	ZIP1_YEAST
biological_process	GO:1901799	negative regulation of proteasomal protein catabolic process	1	1	1	0.911297	0.455954	1	1	UBP6_YEAST
biological_process	GO:0032434	regulation of proteasomal ubiquitin-dependent protein catabolic process	1	1	1	0.780644	0.512975	1	1	UBP6_YEAST
biological_process	GO:1904377	positive regulation of protein localization to cell periphery	1	1	1	1	0.0336838	1	1	VPS35_YEAST
biological_process	GO:0001081	nitrogen catabolite repression of transcription from RNA polymerase II promoter	1	1	1	1	0.18361	1	1	UME6_YEAST
biological_process	GO:0009847	spore germination	1	1	1	1	0.18361	1	1	UME6_YEAST
biological_process	GO:0044571	[2Fe-2S] cluster assembly	1	3	0.333333	0.911297	0.455954	1	1	JAC1_YEAST
biological_process	GO:0006309	apoptotic DNA fragmentation	1	2	0.5	0.966316	0.333537	1	1	NUC1_YEAST
biological_process	GO:0006308	DNA catabolic process	1	1	1	0.953979	0.22949	1	1	NUC1_YEAST
biological_process	GO:0032488	Cdc42 protein signal transduction	1	4	0.25	0.843898	0.555904	1	1	RHO5_YEAST
biological_process	GO:0042275	error-free postreplication DNA repair	1	5	0.2	0.77051	0.637508	1	1	RAD57_YEAST
biological_process	GO:0061420	regulation of transcription from RNA polymerase II promoter in response to biotin starvation	1	1	1	1	0.18361	1	1	VHR1_YEAST
biological_process	GO:0030837	negative regulation of actin filament polymerization	1	3	0.333333	0.947444	0.163548	1	1	AIM21_YEAST
biological_process	GO:2000813	negative regulation of barbed-end actin filament capping	1	2	0.5	0.966316	0.333537	1	1	AIM21_YEAST
biological_process	GO:0070936	protein K48-linked ubiquitination	1	2	0.5	0.966316	0.333537	1	1	HRD1_YEAST
biological_process	GO:0006110	regulation of glycolytic process	1	2	0.5	0.911297	0.455954	1	1	6P22_YEAST
biological_process	GO:0051260	protein homooligomerization	1	2	0.5	0.966316	0.333537	1	1	YD132_YEAST
biological_process	GO:0090218	positive regulation of lipid kinase activity	1	1	1	0.966316	0.333537	1	1	VAC14_YEAST
biological_process	GO:0015718	monocarboxylic acid transport	1	2	0.5	0.511129	0.758026	1	1	YBT1_YEAST
biological_process	GO:0015723	bilirubin transport	1	2	0.5	0.966316	0.333537	1	1	BPT1_YEAST
biological_process	GO:0042998	positive regulation of Golgi to plasma membrane protein transport	1	1	1	1	0.18361	1	1	PIK1_YEAST
biological_process	GO:0050714	positive regulation of protein secretion	1	1	1	1	0.18361	1	1	PIK1_YEAST
biological_process	GO:0071108	protein K48-linked deubiquitination	1	2	0.5	0.966316	0.333537	1	1	YP191_YEAST
biological_process	GO:0043407	negative regulation of MAP kinase activity	1	1	1	1	0.18361	1	1	YD073_YEAST
biological_process	GO:0019309	mannose catabolic process	1	1	1	1	0.18361	1	1	MAN1_YEAST
biological_process	GO:0061161	positive regulation of establishment of bipolar cell polarity regulating cell shape	1	1	1	1	0.18361	1	1	RAX2_YEAST
biological_process	GO:0006277	DNA amplification	1	5	0.2	0.622198	0.758518	1	1	RAD1_YEAST
biological_process	GO:0006296	nucleotide-excision repair, DNA incision, 5'-to lesion	1	4	0.25	0.843898	0.555904	1	1	RAD1_YEAST
biological_process	GO:1901255	nucleotide-excision repair involved in interstrand cross-link repair	1	2	0.5	0.966316	0.333537	1	1	RAD1_YEAST
biological_process	GO:0006295	nucleotide-excision repair, DNA incision, 3'-to lesion	1	1	1	1	0.18361	1	1	RAD2_YEAST
biological_process	GO:0032078	negative regulation of endodeoxyribonuclease activity	1	1	1	1	0.18361	1	1	RAD50_YEAST
biological_process	GO:1990426	mitotic recombination-dependent replication fork processing	1	1	1	1	0.18361	1	1	RAD51_YEAST
biological_process	GO:0045002	double-strand break repair via single-strand annealing	1	3	0.333333	0.975295	0.120893	1	1	NEJ1_YEAST
biological_process	GO:0009202	deoxyribonucleoside triphosphate biosynthetic process	1	1	1	0.911297	0.455954	1	1	RAD53_YEAST
biological_process	GO:0042326	negative regulation of phosphorylation	1	2	0.5	0.331419	0.86944	1	1	RAD53_YEAST
biological_process	GO:1903112	positive regulation of single-strand break repair via homologous recombination	1	2	0.5	0.966316	0.333537	1	1	RAD57_YEAST
biological_process	GO:0110027	negative regulation of DNA strand resection involved in replication fork processing	1	1	1	1	0.18361	1	1	RAD9_YEAST
biological_process	GO:0006490	oligosaccharide-lipid intermediate biosynthetic process	1	6	0.166667	0.208174	0.952524	1	1	ALG8_YEAST
biological_process	GO:1901900	regulation of protein localization to cell division site	1	4	0.25	0.622198	0.758518	1	1	DBF2_YEAST
biological_process	GO:0009164	nucleoside catabolic process	1	3	0.333333	0.552274	0.802916	1	1	HNT2_YEAST
biological_process	GO:0034314	Arp2/3 complex-mediated actin nucleation	1	7	0.142857	0.980354	0.058522	1	1	ARPC5_YEAST
biological_process	GO:0072697	protein localization to cell cortex	1	2	0.5	0.957666	0.168029	1	1	CDC24_YEAST
biological_process	GO:0071322	cellular response to carbohydrate stimulus	1	1	1	0.903102	0.246614	1	1	AZF1_YEAST
biological_process	GO:0017004	cytochrome complex assembly	1	1	1	0.0929988	0.963738	1	1	CBT1_YEAST
biological_process	GO:0071894	histone H2B conserved C-terminal lysine ubiquitination	1	1	1	0.6956	0.70413	1	1	CHD1_YEAST
biological_process	GO:0071361	cellular response to ethanol	1	2	0.5	0.77051	0.637508	1	1	FLO1_YEAST
biological_process	GO:0051259	protein complex oligomerization	1	2	0.5	0.957666	0.168029	1	1	JAC1_YEAST
biological_process	GO:0034983	peptidyl-lysine deacetylation	1	1	1	1	0.18361	1	1	HOS1_YEAST
biological_process	GO:0006747	FAD biosynthetic process	1	1	1	1	0.18361	1	1	FAD1_YEAST
biological_process	GO:0072382	minus-end-directed vesicle transport along microtubule	1	1	1	1	0.18361	1	1	DYHC_YEAST
biological_process	GO:0010147	fructan catabolic process	1	1	1	1	0.18361	1	1	INV2_YEAST
biological_process	GO:1902927	inulin catabolic process	1	1	1	1	0.18361	1	1	INV2_YEAST
biological_process	GO:0034484	raffinose catabolic process	1	1	1	1	0.18361	1	1	INV2_YEAST
biological_process	GO:0017196	N-terminal peptidyl-methionine acetylation	1	6	0.166667	0.6956	0.70413	1	1	NAA35_YEAST
biological_process	GO:0030050	vesicle transport along actin filament	1	4	0.25	0.843898	0.555904	1	1	MYO5_YEAST
biological_process	GO:0016556	mRNA modification	1	1	1	0.372727	0.892889	1	1	NAT10_YEAST
biological_process	GO:1904812	rRNA acetylation involved in maturation of SSU-rRNA	1	1	1	1	0.18361	1	1	NAT10_YEAST
biological_process	GO:0051391	tRNA acetylation	1	1	1	1	0.18361	1	1	NAT10_YEAST
biological_process	GO:0035065	regulation of histone acetylation	1	1	1	0.992488	0.0359573	1	1	INO80_YEAST
biological_process	GO:0032006	regulation of TOR signaling	1	1	1	0.990595	0.0281144	1	1	INO80_YEAST
biological_process	GO:0031494	regulation of mating type switching	1	1	1	0.995174	0.0460215	1	1	MCM1_YEAST
biological_process	GO:0022898	regulation of transmembrane transporter activity	1	1	1	0.966316	0.333537	1	1	NPR1_YEAST
biological_process	GO:0033138	positive regulation of peptidyl-serine phosphorylation	1	1	1	1	0.18361	1	1	NPR2_YEAST
biological_process	GO:0015840	urea transport	1	2	0.5	0.966316	0.333537	1	1	NPR2_YEAST
biological_process	GO:0051058	negative regulation of small GTPase mediated signal transduction	1	2	0.5	0.904246	0.223776	1	1	NPR3_YEAST
biological_process	GO:0034638	phosphatidylcholine catabolic process	1	1	1	1	0.18361	1	1	NTE1_YEAST
biological_process	GO:0016458	obsolete gene silencing	1	1	1	0.503652	0.699759	1	1	NU170_YEAST
biological_process	GO:0043633	polyadenylation-dependent RNA catabolic process	1	1	1	0.404832	0.79733	1	1	NGL3_YEAST
biological_process	GO:0060236	regulation of mitotic spindle organization	1	2	0.5	0.6956	0.70413	1	1	KAR3_YEAST
biological_process	GO:0048205	COPI coating of Golgi vesicle	1	1	1	1	0.18361	1	1	GLO3_YEAST
biological_process	GO:0110032	positive regulation of G2/MI transition of meiotic cell cycle	1	1	1	1	0.18361	1	1	MPIP_YEAST
biological_process	GO:0006278	RNA-dependent DNA biosynthetic process	1	5	0.2	0.756027	0.41081	1	1	DPOD_YEAST
biological_process	GO:0015837	amine transport	1	1	1	0.966316	0.333537	1	1	DTR1_YEAST
biological_process	GO:0019676	ammonia assimilation cycle	1	1	1	1	0.18361	1	1	GLT1_YEAST
biological_process	GO:0097054	L-glutamate biosynthetic process	1	1	1	1	0.18361	1	1	GLT1_YEAST
biological_process	GO:1902969	mitotic DNA replication	1	1	1	0.996005	0.0168639	1	1	MCM6_YEAST
biological_process	GO:0034758	positive regulation of iron ion transport	1	1	1	1	0.18361	1	1	AFT1_YEAST
biological_process	GO:1990641	response to iron ion starvation	1	1	1	1	0.18361	1	1	AFT1_YEAST
biological_process	GO:0045900	negative regulation of translational elongation	1	1	1	0.993826	0.0887032	1	1	DHH1_YEAST
biological_process	GO:0035822	gene conversion	1	1	1	0.986468	0.0653758	1	1	DPOE_YEAST
biological_process	GO:0043487	regulation of RNA stability	1	1	1	0.987333	0.0243003	1	1	EAF3_YEAST
biological_process	GO:0000950	branched-chain amino acid catabolic process to alcohol via Ehrlich pathway	1	1	1	1	0.18361	1	1	ARO10_YEAST
biological_process	GO:0000951	methionine catabolic process to 3-methylthiopropanol	1	1	1	1	0.18361	1	1	ARO10_YEAST
biological_process	GO:0071479	cellular response to ionizing radiation	1	1	1	0.911297	0.455954	1	1	DDC1_YEAST
biological_process	GO:0071816	tail-anchored membrane protein insertion into ER membrane	1	1	1	1	0.18361	1	1	GET1_YEAST
biological_process	GO:0072755	cellular response to benomyl	1	2	0.5	0.966316	0.333537	1	1	GCN2_YEAST
biological_process	GO:1990451	cellular stress response to acidic pH	1	2	0.5	0.966316	0.333537	1	1	GCN2_YEAST
biological_process	GO:0071264	positive regulation of translational initiation in response to starvation	1	3	0.333333	0.911297	0.455954	1	1	GCN2_YEAST
biological_process	GO:0071232	cellular response to histidine	1	2	0.5	0.966316	0.333537	1	1	GCN2_YEAST
biological_process	GO:0100002	negative regulation of protein kinase activity by protein phosphorylation	1	1	1	1	0.18361	1	1	GCN2_YEAST
biological_process	GO:0061435	positive regulation of transcription from a mobile element promoter	1	1	1	1	0.18361	1	1	GCR1_YEAST
biological_process	GO:0033386	geranylgeranyl diphosphate biosynthetic process	1	1	1	1	0.18361	1	1	GGPPS_YEAST
biological_process	GO:0016114	terpenoid biosynthetic process	1	1	1	0.552274	0.802916	1	1	GGPPS_YEAST
biological_process	GO:2001042	negative regulation of septum digestion after cytokinesis	1	1	1	1	0.18361	1	1	AMN1_YEAST
biological_process	GO:0000431	regulation of transcription from RNA polymerase II promoter by galactose	1	2	0.5	0.92033	0.3044	1	1	GAL4_YEAST
biological_process	GO:1905477	positive regulation of protein localization to membrane	1	1	1	1	0.0336838	1	1	2ABA_YEAST
biological_process	GO:0061586	positive regulation of transcription by transcription factor localization	1	1	1	1	0.18361	1	1	2ABA_YEAST
biological_process	GO:2000158	positive regulation of ubiquitin-specific protease activity	1	1	1	1	0.18361	1	1	BRO1_YEAST
biological_process	GO:0034642	mitochondrion migration along actin filament	1	1	1	1	0.18361	1	1	AIM21_YEAST
biological_process	GO:0019265	glycine biosynthetic process, by transamination of glyoxylate	1	1	1	1	0.18361	1	1	AGX1_YEAST
biological_process	GO:0010390	histone monoubiquitination	0	2	0	0.666463	1	1	1
biological_process	GO:0016574	histone ubiquitination	0	7	0	0.152877	0.9684	1	1
biological_process	GO:0070534	protein K63-linked ubiquitination	0	5	0	0.362492	1	1	1
biological_process	GO:0032786	positive regulation of DNA-templated transcription, elongation	0	5	0	0.686182	0.423647	1	1
biological_process	GO:0051571	positive regulation of histone H3-K4 methylation	0	2	0	0.666463	1	1	1
biological_process	GO:0033184	positive regulation of histone ubiquitination	0	1	0	0.666463	1	1	1
biological_process	GO:0033108	mitochondrial respiratory chain complex assembly	0	8	0	0.011401	0.997176	0.98	1
biological_process	GO:0006465	signal peptide processing	0	10	0	0.131258	1	1	1
biological_process	GO:0051444	negative regulation of ubiquitin-protein transferase activity	0	1	0	0.29587	1	1	1
biological_process	GO:0046513	ceramide biosynthetic process	0	9	0	0.107111	1	1	1
biological_process	GO:0140042	lipid droplet formation	0	5	0	0.362492	1	1	1
biological_process	GO:0090155	negative regulation of sphingolipid biosynthetic process	0	5	0	0.362492	1	1	1
biological_process	GO:1990044	protein localization to lipid droplet	0	2	0	0.666463	1	1	1
biological_process	GO:0048026	positive regulation of mRNA splicing, via spliceosome	0	2	0	0.666463	1	1	1
biological_process	GO:0045490	pectin catabolic process	0	1	0	0.81639	1	1	1
biological_process	GO:0019255	glucose 1-phosphate metabolic process	0	2	0	0.666463	1	1	1
biological_process	GO:0006011	UDP-glucose metabolic process	0	4	0	0.444096	1	1	1
biological_process	GO:0006874	cellular calcium ion homeostasis	0	16	0	0.00759122	1	0.917	1
biological_process	GO:0046115	guanosine catabolic process	0	2	0	0.666463	1	1	1
biological_process	GO:0006148	inosine catabolic process	0	2	0	0.666463	1	1	1
biological_process	GO:0006166	purine ribonucleoside salvage	0	6	0	0.622198	0.758518	1	1
biological_process	GO:0043942	negative regulation of sexual sporulation resulting in formation of a cellular spore	0	1	0	0.911297	0.455954	1	1
biological_process	GO:0008654	phospholipid biosynthetic process	0	19	0	0.263967	0.810051	1	1
biological_process	GO:1901352	negative regulation of phosphatidylglycerol biosynthetic process	0	3	0	0.544046	1	1	1
biological_process	GO:0006658	phosphatidylserine metabolic process	0	2	0	0.362492	1	1	1
biological_process	GO:2001247	positive regulation of phosphatidylcholine biosynthetic process	0	3	0	0.544046	1	1	1
biological_process	GO:0009094	L-phenylalanine biosynthetic process	0	4	0	0.444096	1	1	1
biological_process	GO:0046898	response to cycloheximide	0	3	0	0.77051	0.637508	1	1
biological_process	GO:0042631	cellular response to water deprivation	0	3	0	0.6956	0.70413	1	1
biological_process	GO:0031384	regulation of initiation of mating projection growth	0	4	0	0.444096	1	1	1
biological_process	GO:0031385	regulation of termination of mating projection growth	0	4	0	0.444096	1	1	1
biological_process	GO:0007007	inner mitochondrial membrane organization	0	5	0	0.331581	0.828046	1	1
biological_process	GO:0070584	mitochondrion morphogenesis	0	2	0	0.666463	1	1	1
biological_process	GO:0045861	negative regulation of proteolysis	0	2	0	0.552274	0.802916	1	1
biological_process	GO:0048284	organelle fusion	0	2	0	0.963115	0.0603646	1	1
biological_process	GO:0046475	glycerophospholipid catabolic process	0	6	0	0.552274	0.802916	1	1
biological_process	GO:0034478	phosphatidylglycerol catabolic process	0	1	0	0.81639	1	1	1
biological_process	GO:0036205	histone catabolic process	0	5	0	0.362492	1	1	1
biological_process	GO:0006657	CDP-choline pathway	0	2	0	0.666463	1	1	1
biological_process	GO:0003400	regulation of COPII vesicle coating	0	5	0	0.362492	1	1	1
biological_process	GO:0009443	pyridoxal 5'-phosphate salvage	0	3	0	0.544046	1	1	1
biological_process	GO:0008615	pyridoxine biosynthetic process	0	6	0	0.29587	1	1	1
biological_process	GO:0006198	cAMP catabolic process	0	1	0	0.81639	1	1	1
biological_process	GO:0046069	cGMP catabolic process	0	1	0	0.81639	1	1	1
biological_process	GO:1902660	negative regulation of glucose mediated signaling pathway	0	4	0	0.444096	1	1	1
biological_process	GO:0045719	negative regulation of glycogen biosynthetic process	0	5	0	0.362492	1	1	1
biological_process	GO:0051302	regulation of cell division	0	2	0	0.596407	0.58157	1	1
biological_process	GO:0032878	regulation of establishment or maintenance of cell polarity	0	4	0	0.879107	0.377802	1	1
biological_process	GO:0006672	ceramide metabolic process	0	4	0	0.0713169	1	1	1
biological_process	GO:0019915	lipid storage	0	5	0	0.160841	1	1	1
biological_process	GO:0055091	phospholipid homeostasis	0	3	0	0.544046	1	1	1
biological_process	GO:0019432	triglyceride biosynthetic process	0	3	0	0.362492	1	1	1
biological_process	GO:0019655	glycolytic fermentation to ethanol	0	4	0	0.622198	0.758518	1	1
biological_process	GO:0006090	pyruvate metabolic process	0	10	0	0.104597	0.958334	1	1
biological_process	GO:0045069	regulation of viral genome replication	0	2	0	0.666463	1	1	1
biological_process	GO:0045739	positive regulation of DNA repair	0	1	0	0.622198	0.758518	1	1
biological_process	GO:0045740	positive regulation of DNA replication	0	4	0	0.511129	0.758026	1	1
biological_process	GO:1902394	positive regulation of exodeoxyribonuclease activity	0	1	0	0.81639	1	1	1
biological_process	GO:1903022	positive regulation of phosphodiesterase activity, acting on 3'-phosphoglycolate-terminated DNA strands	0	1	0	0.81639	1	1	1
biological_process	GO:0010821	regulation of mitochondrion organization	0	2	0	0.572698	0.668581	1	1
biological_process	GO:0042391	regulation of membrane potential	0	2	0	0.362492	1	1	1
biological_process	GO:0006637	acyl-CoA metabolic process	0	1	0	0.20267	0.931839	1	1
biological_process	GO:0009062	fatty acid catabolic process	0	3	0	0.041199	0.993809	1	1
biological_process	GO:0019395	fatty acid oxidation	0	2	0	0.111274	0.978971	1	1
biological_process	GO:0001682	tRNA 5'-leader removal	0	11	0	0.107111	1	1	1
biological_process	GO:0001561	fatty acid alpha-oxidation	0	2	0	0.666463	1	1	1
biological_process	GO:1901901	regulation of protein localization to cell division site involved in cytokinesis	0	2	0	0.666463	1	1	1
biological_process	GO:0097745	mitochondrial tRNA 5'-end processing	0	5	0	0.362492	1	1	1
biological_process	GO:0002181	cytoplasmic translation	0	148	0	8.88489e-12	1	0	1
biological_process	GO:0006564	L-serine biosynthetic process	0	5	0	0.362492	1	1	1
biological_process	GO:0009070	serine family amino acid biosynthetic process	0	3	0	0.695896	0.496348	1	1
biological_process	GO:1905216	positive regulation of RNA binding	0	2	0	0.544046	1	1	1
biological_process	GO:0000452	snoRNA guided rRNA 2'-O-methylation	0	4	0	0.444096	1	1	1
biological_process	GO:0009113	purine nucleobase biosynthetic process	0	4	0	0.131258	1	1	1
biological_process	GO:0080009	mRNA methylation	0	4	0	0.444096	1	1	1
biological_process	GO:0009051	pentose-phosphate shunt, oxidative branch	0	7	0	0.241482	1	1	1
biological_process	GO:0000388	spliceosome conformational change to release U4 (or U4atac) and U1 (or U11)	0	3	0	0.544046	1	1	1
biological_process	GO:0006450	regulation of translational fidelity	0	13	0	0.0681611	0.988588	1	1
biological_process	GO:0000054	ribosomal subunit export from nucleus	0	11	0	0.620947	0.517997	1	1
biological_process	GO:0006452	translational frameshifting	0	6	0	0.552274	0.802916	1	1
biological_process	GO:0006662	glycerol ether metabolic process	0	2	0	0.666463	1	1	1
biological_process	GO:0080058	protein deglutathionylation	0	2	0	0.666463	1	1	1
biological_process	GO:0071266	'de novo' L-methionine biosynthetic process	0	1	0	0.81639	1	1	1
biological_process	GO:0019343	cysteine biosynthetic process via cystathionine	0	3	0	0.544046	1	1	1
biological_process	GO:0019346	transsulfuration	0	10	0	0.131258	1	1	1
biological_process	GO:0007329	positive regulation of transcription from RNA polymerase II promoter by pheromones	0	6	0	0.29587	1	1	1
biological_process	GO:0019953	sexual reproduction	0	1	0	0.525397	0.54405	1	1
biological_process	GO:0035405	histone-threonine phosphorylation	0	1	0	0.81639	1	1	1
biological_process	GO:0071507	pheromone response MAPK cascade	0	3	0	0.544046	1	1	1
biological_process	GO:0010525	regulation of transposition, RNA-mediated	0	6	0	0.461679	0.791826	1	1
biological_process	GO:0015802	basic amino acid transport	0	7	0	0.241974	0.941811	1	1
biological_process	GO:0070183	mitochondrial tryptophanyl-tRNA aminoacylation	0	1	0	0.81639	1	1	1
biological_process	GO:0006436	tryptophanyl-tRNA aminoacylation	0	2	0	0.666463	1	1	1
biological_process	GO:0070588	calcium ion transmembrane transport	0	7	0	0.160841	1	1	1
biological_process	GO:0051027	DNA transport	0	2	0	0.666463	1	1	1
biological_process	GO:1902906	proteasome storage granule assembly	0	4	0	0.444096	1	1	1
biological_process	GO:0034227	tRNA thio-modification	0	5	0	0.622198	0.758518	1	1
biological_process	GO:0006741	NADP biosynthetic process	0	3	0	0.544046	1	1	1
biological_process	GO:0019408	dolichol biosynthetic process	0	4	0	0.362492	1	1	1
biological_process	GO:0007618	mating	0	2	0	0.666463	1	1	1
biological_process	GO:1904659	glucose transmembrane transport	0	7	0	0.178613	0.961266	1	1
biological_process	GO:0019509	L-methionine salvage from methylthioadenosine	0	9	0	0.160841	1	1	1
biological_process	GO:0006555	methionine metabolic process	0	4	0	0.468108	0.697784	1	1
biological_process	GO:0034462	small-subunit processome assembly	0	2	0	0.666463	1	1	1
biological_process	GO:0000373	Group II intron splicing	0	1	0	0.81639	1	1	1
biological_process	GO:0000963	mitochondrial RNA processing	0	3	0	0.300241	0.863902	1	1
biological_process	GO:0034337	RNA folding	0	2	0	0.666463	1	1	1
biological_process	GO:0006392	transcription elongation from mitochondrial promoter	0	1	0	0.81639	1	1	1
biological_process	GO:0009435	NAD biosynthetic process	0	6	0	0.241974	0.941811	1	1
biological_process	GO:0051097	negative regulation of helicase activity	0	1	0	0.544046	1	1	1
biological_process	GO:0044154	histone H3-K14 acetylation	0	4	0	0.6956	0.70413	1	1
biological_process	GO:0097720	calcineurin-mediated signaling	0	2	0	0.666463	1	1	1
biological_process	GO:0006873	cellular ion homeostasis	0	13	0	0.0214764	0.987675	0.999	1
biological_process	GO:0071072	negative regulation of phospholipid biosynthetic process	0	3	0	0.160841	1	1	1
biological_process	GO:0044205	'de novo' UMP biosynthetic process	0	6	0	0.29587	1	1	1
biological_process	GO:0019240	citrulline biosynthetic process	0	3	0	0.544046	1	1	1
biological_process	GO:0045984	negative regulation of pyrimidine nucleobase metabolic process	0	1	0	0.81639	1	1	1
biological_process	GO:0006228	UTP biosynthetic process	0	3	0	0.544046	1	1	1
biological_process	GO:0051177	meiotic sister chromatid cohesion	0	3	0	0.671742	0.627273	1	1
biological_process	GO:1905339	positive regulation of cohesin unloading	0	3	0	0.544046	1	1	1
biological_process	GO:0071459	protein localization to chromosome, centromeric region	0	7	0	0.880782	0.261118	1	1
biological_process	GO:1904183	negative regulation of pyruvate dehydrogenase activity	0	1	0	0.81639	1	1	1
biological_process	GO:0045762	positive regulation of adenylate cyclase activity	0	3	0	0.544046	1	1	1
biological_process	GO:0007265	Ras protein signal transduction	0	12	0	0.743032	0.379053	1	1
biological_process	GO:0010828	positive regulation of glucose transmembrane transport	0	5	0	0.362492	1	1	1
biological_process	GO:0071169	establishment of protein localization to chromatin	0	4	0	0.444096	1	1	1
biological_process	GO:0070200	establishment of protein localization to telomere	0	1	0	0.81639	1	1	1
biological_process	GO:0071919	G-quadruplex DNA formation	0	2	0	0.666463	1	1	1
biological_process	GO:0001207	obsolete histone displacement	0	4	0	0.362492	1	1	1
biological_process	GO:0031848	protection from non-homologous end joining at telomere	0	2	0	0.666463	1	1	1
biological_process	GO:0000469	cleavage involved in rRNA processing	0	5	0	0.152648	0.909277	1	1
biological_process	GO:0042255	ribosome assembly	0	5	0	0.0953829	0.949817	1	1
biological_process	GO:0006407	rRNA export from nucleus	0	18	0	0.0257786	1	1	1
biological_process	GO:0002109	maturation of SSU-rRNA from tricistronic rRNA transcript (SSU-rRNA, LSU-rRNA,5S)	0	1	0	0.81639	1	1	1
biological_process	GO:0019941	modification-dependent protein catabolic process	0	5	0	0.36007	0.70142	1	1
biological_process	GO:0000028	ribosomal small subunit assembly	0	23	0	0.00504867	1	0.785	1
biological_process	GO:0034644	cellular response to UV	0	2	0	0.6956	0.70413	1	1
biological_process	GO:0045723	positive regulation of fatty acid biosynthetic process	0	1	0	0.81639	1	1	1
biological_process	GO:0032436	positive regulation of proteasomal ubiquitin-dependent protein catabolic process	0	3	0	0.6956	0.70413	1	1
biological_process	GO:0048260	positive regulation of receptor-mediated endocytosis	0	1	0	0.957666	0.168029	1	1
biological_process	GO:0032956	regulation of actin cytoskeleton organization	0	12	0	0.915713	0.140342	1	1
biological_process	GO:0010794	regulation of dolichol biosynthetic process	0	1	0	0.81639	1	1	1
biological_process	GO:0032443	regulation of ergosterol biosynthetic process	0	3	0	0.362492	1	1	1
biological_process	GO:0010793	regulation of mRNA export from nucleus	0	2	0	0.544046	1	1	1
biological_process	GO:0010796	regulation of multivesicular body size	0	1	0	0.81639	1	1	1
biological_process	GO:0019220	regulation of phosphate metabolic process	0	2	0	0.504981	0.580188	1	1
biological_process	GO:2000203	regulation of ribosomal large subunit export from nucleus	0	1	0	0.81639	1	1	1
biological_process	GO:2000238	regulation of tRNA export from nucleus	0	1	0	0.81639	1	1	1
biological_process	GO:2000235	regulation of tRNA processing	0	1	0	0.81639	1	1	1
biological_process	GO:0032014	positive regulation of ARF protein signal transduction	0	1	0	0.81639	1	1	1
biological_process	GO:0034067	protein localization to Golgi apparatus	0	5	0	0.941478	0.145231	1	1
biological_process	GO:0006437	tyrosyl-tRNA aminoacylation	0	1	0	0.966316	0.333537	1	1
biological_process	GO:0006435	threonyl-tRNA aminoacylation	0	2	0	0.666463	1	1	1
biological_process	GO:0070159	mitochondrial threonyl-tRNA aminoacylation	0	1	0	0.81639	1	1	1
biological_process	GO:0006433	prolyl-tRNA aminoacylation	0	2	0	0.666463	1	1	1
biological_process	GO:0000017	alpha-glucoside transport	0	4	0	0.444096	1	1	1
biological_process	GO:0000023	maltose metabolic process	0	6	0	0.0713169	1	1	1
biological_process	GO:0000154	rRNA modification	0	5	0	0.193238	0.922395	1	1
biological_process	GO:0045292	mRNA cis splicing, via spliceosome	0	8	0	0.208174	0.952524	1	1
biological_process	GO:0042789	mRNA transcription by RNA polymerase II	0	3	0	0.544046	1	1	1
biological_process	GO:0018230	peptidyl-L-cysteine S-palmitoylation	0	6	0	0.29587	1	1	1
biological_process	GO:0018345	protein palmitoylation	0	8	0	0.197084	1	1	1
biological_process	GO:0006094	gluconeogenesis	0	14	0	0.693905	0.481413	1	1
biological_process	GO:0046166	glyceraldehyde-3-phosphate biosynthetic process	0	1	0	0.81639	1	1	1
biological_process	GO:0019563	glycerol catabolic process	0	6	0	0.29587	1	1	1
biological_process	GO:0034968	histone lysine methylation	0	2	0	0.466281	0.729948	1	1
biological_process	GO:0098653	centromere clustering	0	3	0	0.544046	1	1	1
biological_process	GO:0051594	detection of glucose	0	3	0	0.544046	1	1	1
biological_process	GO:0015755	fructose transmembrane transport	0	1	0	0.911297	0.455954	1	1
biological_process	GO:0015761	mannose transmembrane transport	0	2	0	0.666463	1	1	1
biological_process	GO:1905356	regulation of snRNA pseudouridine synthesis	0	2	0	0.666463	1	1	1
biological_process	GO:1904902	ESCRT III complex assembly	0	2	0	0.666463	1	1	1
biological_process	GO:2000218	negative regulation of invasive growth in response to glucose limitation	0	3	0	0.544046	1	1	1
biological_process	GO:0044262	cellular carbohydrate metabolic process	0	6	0	0.193496	0.86092	1	1
biological_process	GO:0072657	protein localization to membrane	0	3	0	0.554685	0.527006	1	1
biological_process	GO:0051180	vitamin transport	0	2	0	0.160841	1	1	1
biological_process	GO:1902047	polyamine transmembrane transport	0	1	0	0.666463	1	1	1
biological_process	GO:0015847	putrescine transport	0	5	0	0.362492	1	1	1
biological_process	GO:0015848	spermidine transport	0	5	0	0.362492	1	1	1
biological_process	GO:0000296	spermine transport	0	6	0	0.29587	1	1	1
biological_process	GO:0015846	polyamine transport	0	2	0	0.0874021	1	1	1
biological_process	GO:0035970	peptidyl-threonine dephosphorylation	0	4	0	0.444096	1	1	1
biological_process	GO:0070413	trehalose metabolism in response to stress	0	1	0	0.666463	1	1	1
biological_process	GO:0046939	nucleotide phosphorylation	0	1	0	0.135218	0.950035	1	1
biological_process	GO:0009968	negative regulation of signal transduction	0	5	0	0.881006	0.197073	1	1
biological_process	GO:0071497	cellular response to freezing	0	1	0	0.666463	1	1	1
biological_process	GO:1902657	protein localization to prospore membrane	0	1	0	0.81639	1	1	1
biological_process	GO:0031382	mating projection formation	0	2	0	0.241482	1	1	1
biological_process	GO:0036261	7-methylguanosine cap hypermethylation	0	9	0	0.160841	1	1	1
biological_process	GO:0043972	histone H3-K23 acetylation	0	2	0	0.666463	1	1	1
biological_process	GO:0043974	histone H3-K27 acetylation	0	1	0	0.81639	1	1	1
biological_process	GO:0097043	histone H3-K56 acetylation	0	4	0	0.444096	1	1	1
biological_process	GO:0043970	histone H3-K9 acetylation	0	3	0	0.6956	0.70413	1	1
biological_process	GO:0006334	nucleosome assembly	0	20	0	0.0347467	0.994951	1	1
biological_process	GO:2001032	regulation of double-strand break repair via nonhomologous end joining	0	1	0	0.879107	0.377802	1	1
biological_process	GO:0006336	DNA replication-independent chromatin assembly	0	6	0	0.241482	1	1	1
biological_process	GO:1905329	sphingoid long-chain base transport	0	3	0	0.544046	1	1	1
biological_process	GO:0000387	spliceosomal snRNP assembly	0	11	0	0.178613	0.961266	1	1
biological_process	GO:0070124	mitochondrial translational initiation	0	7	0	0.552274	0.802916	1	1
biological_process	GO:0045116	protein neddylation	0	6	0	0.29587	1	1	1
biological_process	GO:0030162	regulation of proteolysis	0	5	0	0.58919	0.604337	1	1
biological_process	GO:2001165	positive regulation of phosphorylation of RNA polymerase II C-terminal domain serine 2 residues	0	4	0	0.444096	1	1	1
biological_process	GO:0034402	recruitment of 3'-end processing factors to RNA polymerase II holoenzyme complex	0	3	0	0.444096	1	1	1
biological_process	GO:2001173	regulation of histone H2B conserved C-terminal lysine ubiquitination	0	5	0	0.362492	1	1	1
biological_process	GO:2001166	regulation of histone H2B ubiquitination	0	2	0	0.29587	1	1	1
biological_process	GO:0051569	regulation of histone H3-K4 methylation	0	3	0	0.362492	1	1	1
biological_process	GO:2001160	regulation of histone H3-K79 methylation	0	1	0	0.81639	1	1	1
biological_process	GO:2001163	regulation of phosphorylation of RNA polymerase II C-terminal domain serine 2 residues	0	2	0	0.444096	1	1	1
biological_process	GO:0090262	regulation of transcription-coupled nucleotide-excision repair	0	7	0	0.241482	1	1	1
biological_process	GO:0001079	nitrogen catabolite regulation of transcription from RNA polymerase II promoter	0	1	0	0.831971	0.447726	1	1
biological_process	GO:0006103	2-oxoglutarate metabolic process	0	6	0	0.622198	0.758518	1	1
biological_process	GO:0034220	ion transmembrane transport	0	6	0	6.01969e-06	0.999998	0	1
biological_process	GO:0120029	proton export across plasma membrane	0	2	0	0.666463	1	1	1
biological_process	GO:0009298	GDP-mannose biosynthetic process	0	3	0	0.544046	1	1	1
biological_process	GO:0043409	negative regulation of MAPK cascade	0	6	0	0.622198	0.758518	1	1
biological_process	GO:0043709	cell adhesion involved in single-species biofilm formation	0	4	0	0.77051	0.637508	1	1
biological_process	GO:0061188	negative regulation of ribosomal DNA heterochromatin assembly	0	8	0	0.197084	1	1	1
biological_process	GO:0009166	nucleotide catabolic process	0	3	0	0.131258	1	1	1
biological_process	GO:0006206	pyrimidine nucleobase metabolic process	0	2	0	0.461679	0.791826	1	1
biological_process	GO:0090158	endoplasmic reticulum membrane organization	0	6	0	0.780644	0.512975	1	1
biological_process	GO:0061817	endoplasmic reticulum-plasma membrane tethering	0	5	0	0.362492	1	1	1
biological_process	GO:0042308	negative regulation of protein import into nucleus	0	1	0	0.81639	1	1	1
biological_process	GO:0032377	regulation of intracellular lipid transport	0	1	0	0.81639	1	1	1
biological_process	GO:0060304	regulation of phosphatidylinositol dephosphorylation	0	7	0	0.241482	1	1	1
biological_process	GO:0000752	agglutination involved in conjugation with cellular fusion	0	4	0	0.444096	1	1	1
biological_process	GO:0098609	cell-cell adhesion	0	2	0	0.903102	0.246614	1	1
biological_process	GO:0006616	SRP-dependent cotranslational protein targeting to membrane, translocation	0	13	0	0.0713169	1	1	1
biological_process	GO:0006882	cellular zinc ion homeostasis	0	12	0	0.0874021	1	1	1
biological_process	GO:1901856	negative regulation of cellular respiration	0	1	0	0.81639	1	1	1
biological_process	GO:0051091	positive regulation of DNA-binding transcription factor activity	0	2	0	0.666463	1	1	1
biological_process	GO:0036091	positive regulation of transcription from RNA polymerase II promoter in response to oxidative stress	0	1	0	0.666463	1	1	1
biological_process	GO:0015680	protein maturation by copper ion transfer	0	5	0	0.362492	1	1	1
biological_process	GO:0019430	removal of superoxide radicals	0	6	0	0.29587	1	1	1
biological_process	GO:0006801	superoxide metabolic process	0	1	0	0.29587	1	1	1
biological_process	GO:0043934	sporulation	0	5	0	0.516137	0.563899	1	1
biological_process	GO:0071163	DNA replication preinitiation complex assembly	0	1	0	0.911297	0.455954	1	1
biological_process	GO:0046488	phosphatidylinositol metabolic process	0	5	0	0.268091	0.822393	1	1
biological_process	GO:0015931	nucleobase-containing compound transport	0	1	0	0.948102	0.0748004	1	1
biological_process	GO:0061091	regulation of phospholipid translocation	0	3	0	0.29587	1	1	1
biological_process	GO:0046578	regulation of Ras protein signal transduction	0	5	0	0.596407	0.58157	1	1
biological_process	GO:2001208	negative regulation of transcription elongation by RNA polymerase I	0	2	0	0.666463	1	1	1
biological_process	GO:0034243	regulation of transcription elongation from RNA polymerase II promoter	0	2	0	0.546643	0.575339	1	1
biological_process	GO:0098787	mRNA cleavage involved in mRNA processing	0	2	0	0.954072	0.112974	1	1
biological_process	GO:0000379	tRNA-type intron splice site recognition and cleavage	0	4	0	0.444096	1	1	1
biological_process	GO:0090502	RNA phosphodiester bond hydrolysis, endonucleolytic	0	9	0	0.272462	0.82599	1	1
biological_process	GO:0016031	tRNA import into mitochondrion	0	1	0	0.81639	1	1	1
biological_process	GO:2000766	negative regulation of cytoplasmic translation	0	4	0	0.444096	1	1	1
biological_process	GO:0009302	sno(s)RNA transcription	0	1	0	0.77051	0.637508	1	1
biological_process	GO:0031564	transcription antitermination	0	3	0	0.544046	1	1	1
biological_process	GO:0034724	DNA replication-independent chromatin organization	0	3	0	0.131258	1	1	1
biological_process	GO:0007063	regulation of sister chromatid cohesion	0	1	0	0.131258	1	1	1
biological_process	GO:0016094	polyprenol biosynthetic process	0	2	0	0.362492	1	1	1
biological_process	GO:0036498	IRE1-mediated unfolded protein response	0	5	0	0.879107	0.377802	1	1
biological_process	GO:0120236	negative regulation of posttranslational protein targeting to membrane, translocation	0	2	0	0.666463	1	1	1
biological_process	GO:0071630	nuclear protein quality control by the ubiquitin-proteasome system	0	5	0	0.362492	1	1	1
biological_process	GO:0032509	endosome transport via multivesicular body sorting pathway	0	7	0	0.444782	0.685008	1	1
biological_process	GO:0016540	protein autoprocessing	0	3	0	0.544046	1	1	1
biological_process	GO:0051053	negative regulation of DNA metabolic process	0	1	0	0.956487	0.0934863	1	1
biological_process	GO:0070898	RNA polymerase III preinitiation complex assembly	0	6	0	0.29587	1	1	1
biological_process	GO:0006617	SRP-dependent cotranslational protein targeting to membrane, signal sequence recognition	0	1	0	0.81639	1	1	1
biological_process	GO:0071333	cellular response to glucose stimulus	0	1	0	0.796162	0.436959	1	1
biological_process	GO:0001188	RNA polymerase I preinitiation complex assembly	0	2	0	0.666463	1	1	1
biological_process	GO:0071034	CUT catabolic process	0	4	0	0.511129	0.758026	1	1
biological_process	GO:0043928	exonucleolytic catabolism of deadenylated mRNA	0	6	0	0.29587	1	1	1
biological_process	GO:0043628	ncRNA 3'-end processing	0	7	0	0.255903	0.852373	1	1
biological_process	GO:0006314	intron homing	0	6	0	0.197084	1	1	1
biological_process	GO:0015990	electron transport coupled proton transport	0	4	0	0.444096	1	1	1
biological_process	GO:0006123	mitochondrial electron transport, cytochrome c to oxygen	0	18	0	0.0257786	1	1	1
biological_process	GO:0022904	respiratory electron transport chain	0	7	0	0.00116641	0.999896	0.285	1
biological_process	GO:1905183	negative regulation of protein serine/threonine phosphatase activity	0	4	0	0.444096	1	1	1
biological_process	GO:0070096	mitochondrial outer membrane translocase complex assembly	0	9	0	0.160841	1	1	1
biological_process	GO:0070583	spore membrane bending pathway	0	3	0	0.544046	1	1	1
biological_process	GO:0018188	peptidyl-proline di-hydroxylation	0	1	0	0.81639	1	1	1
biological_process	GO:0019511	peptidyl-proline hydroxylation	0	1	0	0.81639	1	1	1
biological_process	GO:0006415	translational termination	0	12	0	0.177919	0.942292	1	1
biological_process	GO:0006189	'de novo' IMP biosynthetic process	0	9	0	0.160841	1	1	1
biological_process	GO:0051881	regulation of mitochondrial membrane potential	0	2	0	0.666463	1	1	1
biological_process	GO:0032790	ribosome disassembly	0	7	0	0.241482	1	1	1
biological_process	GO:0019323	pentose catabolic process	0	1	0	0.552274	0.802916	1	1
biological_process	GO:0006098	pentose-phosphate shunt	0	5	0	0.0713169	1	1	1
biological_process	GO:0009052	pentose-phosphate shunt, non-oxidative branch	0	4	0	0.444096	1	1	1
biological_process	GO:0051788	response to misfolded protein	0	1	0	0.20267	0.931839	1	1
biological_process	GO:0018216	peptidyl-arginine methylation	0	3	0	0.444096	1	1	1
biological_process	GO:1990536	phosphoenolpyruvate transmembrane import into Golgi lumen	0	2	0	0.666463	1	1	1
biological_process	GO:1903740	positive regulation of phosphatidate phosphatase activity	0	2	0	0.666463	1	1	1
biological_process	GO:0032055	negative regulation of translation in response to stress	0	1	0	0.81639	1	1	1
biological_process	GO:0016562	protein import into peroxisome matrix, receptor recycling	0	5	0	0.362492	1	1	1
biological_process	GO:0097749	membrane tubulation	0	2	0	0.666463	1	1	1
biological_process	GO:1900063	regulation of peroxisome organization	0	2	0	0.666463	1	1	1
biological_process	GO:1904524	negative regulation of DNA amplification	0	2	0	0.666463	1	1	1
biological_process	GO:0019358	nicotinate nucleotide salvage	0	4	0	0.444096	1	1	1
biological_process	GO:0006518	peptide metabolic process	0	2	0	8.2555e-10	1	0	1
biological_process	GO:0000964	mitochondrial RNA 5'-end processing	0	1	0	0.29587	1	1	1
biological_process	GO:0044208	'de novo' AMP biosynthetic process	0	2	0	0.666463	1	1	1
biological_process	GO:0016072	rRNA metabolic process	0	3	0	0.00089254	0.99951	0.227	1
biological_process	GO:0034473	U1 snRNA 3'-end processing	0	6	0	0.29587	1	1	1
biological_process	GO:0034476	U5 snRNA 3'-end processing	0	11	0	0.107111	1	1	1
biological_process	GO:0045860	positive regulation of protein kinase activity	0	8	0	0.864473	0.269541	1	1
biological_process	GO:0006428	isoleucyl-tRNA aminoacylation	0	2	0	0.666463	1	1	1
biological_process	GO:0070152	mitochondrial isoleucyl-tRNA aminoacylation	0	1	0	0.81639	1	1	1
biological_process	GO:0046967	cytosol to endoplasmic reticulum transport	0	1	0	0.81639	1	1	1
biological_process	GO:0000103	sulfate assimilation	0	7	0	0.487025	0.839159	1	1
biological_process	GO:0006565	L-serine catabolic process	0	3	0	0.544046	1	1	1
biological_process	GO:0007190	activation of adenylate cyclase activity	0	1	0	0.81639	1	1	1
biological_process	GO:0000411	positive regulation of transcription by galactose	0	4	0	0.726753	0.572907	1	1
biological_process	GO:0006112	energy reserve metabolic process	0	2	0	0.182853	0.918443	1	1
biological_process	GO:1990180	mitochondrial tRNA 3'-end processing	0	1	0	0.81639	1	1	1
biological_process	GO:0072684	mitochondrial tRNA 3'-trailer cleavage, endonucleolytic	0	1	0	0.81639	1	1	1
biological_process	GO:0034414	tRNA 3'-trailer cleavage, endonucleolytic	0	1	0	0.81639	1	1	1
biological_process	GO:0000160	phosphorelay signal transduction system	0	2	0	0.953979	0.22949	1	1
biological_process	GO:1903452	positive regulation of G1 to G0 transition	0	4	0	0.444096	1	1	1
biological_process	GO:1901992	positive regulation of mitotic cell cycle phase transition	0	3	0	0.8737	0.227136	1	1
biological_process	GO:0051039	positive regulation of transcription involved in meiotic cell cycle	0	1	0	0.911297	0.455954	1	1
biological_process	GO:1990145	maintenance of translational fidelity	0	5	0	0.362492	1	1	1
biological_process	GO:0042779	tRNA 3'-trailer cleavage	0	1	0	0.544046	1	1	1
biological_process	GO:0097320	plasma membrane tubulation	0	3	0	0.444096	1	1	1
biological_process	GO:0042776	mitochondrial ATP synthesis coupled proton transport	0	8	0	0.197084	1	1	1
biological_process	GO:0045039	protein insertion into mitochondrial inner membrane	0	12	0	0.0874021	1	1	1
biological_process	GO:0034463	90S preribosome assembly	0	1	0	0.81639	1	1	1
biological_process	GO:0006424	glutamyl-tRNA aminoacylation	0	2	0	0.666463	1	1	1
biological_process	GO:0070149	mitochondrial glutamyl-tRNA aminoacylation	0	1	0	0.81639	1	1	1
biological_process	GO:0072318	clathrin coat disassembly	0	2	0	0.666463	1	1	1
biological_process	GO:0019354	siroheme biosynthetic process	0	2	0	0.666463	1	1	1
biological_process	GO:0006425	glutaminyl-tRNA aminoacylation	0	1	0	0.81639	1	1	1
biological_process	GO:0008655	pyrimidine-containing compound salvage	0	6	0	0.29587	1	1	1
biological_process	GO:0044206	UMP salvage	0	4	0	0.444096	1	1	1
biological_process	GO:0019858	cytosine metabolic process	0	2	0	0.666463	1	1	1
biological_process	GO:0006212	uracil catabolic process	0	1	0	0.81639	1	1	1
biological_process	GO:0060962	regulation of ribosomal protein gene transcription by RNA polymerase II	0	8	0	0.955085	0.119218	1	1
biological_process	GO:0006356	regulation of transcription by RNA polymerase I	0	6	0	0.483097	0.674014	1	1
biological_process	GO:0006359	regulation of transcription by RNA polymerase III	0	7	0	0.461679	0.791826	1	1
biological_process	GO:0002183	cytoplasmic translational initiation	0	4	0	0.430221	0.757804	1	1
biological_process	GO:1903574	negative regulation of cellular response to amino acid starvation	0	1	0	0.81639	1	1	1
biological_process	GO:1900039	positive regulation of cellular response to hypoxia	0	1	0	0.81639	1	1	1
biological_process	GO:2000640	positive regulation of SREBP signaling pathway	0	1	0	0.81639	1	1	1
biological_process	GO:0071218	cellular response to misfolded protein	0	4	0	0.20267	0.931839	1	1
biological_process	GO:0071500	cellular response to nitrosative stress	0	2	0	0.544046	1	1	1
biological_process	GO:1902170	cellular response to reactive nitrogen species	0	1	0	0.81639	1	1	1
biological_process	GO:0046210	nitric oxide catabolic process	0	2	0	0.666463	1	1	1
biological_process	GO:0009636	response to toxic substance	0	5	0	0.071539	0.976706	1	1
biological_process	GO:0000947	amino acid catabolic process to alcohol via Ehrlich pathway	0	6	0	0.726753	0.572907	1	1
biological_process	GO:0006069	ethanol oxidation	0	1	0	0.81639	1	1	1
biological_process	GO:0046294	formaldehyde catabolic process	0	2	0	0.666463	1	1	1
biological_process	GO:0033859	furaldehyde metabolic process	0	2	0	0.666463	1	1	1
biological_process	GO:1905268	negative regulation of chromatin organization	0	4	0	0.332787	0.844205	1	1
biological_process	GO:0016480	negative regulation of transcription by RNA polymerase III	0	5	0	0.362492	1	1	1
biological_process	GO:0070935	3'-UTR-mediated mRNA stabilization	0	2	0	0.666463	1	1	1
biological_process	GO:1903873	negative regulation of DNA recombinase mediator complex assembly	0	1	0	0.81639	1	1	1
biological_process	GO:0045950	negative regulation of mitotic recombination	0	3	0	0.544046	1	1	1
biological_process	GO:0006458	'de novo' protein folding	0	6	0	0.105424	0.96303	1	1
biological_process	GO:0015936	coenzyme A metabolic process	0	2	0	0.427093	0.868742	1	1
biological_process	GO:1901917	regulation of exoribonuclease activity	0	1	0	0.666463	1	1	1
biological_process	GO:0055072	iron ion homeostasis	0	9	0	0.186165	0.895101	1	1
biological_process	GO:0002182	cytoplasmic translational elongation	0	4	0	0.0874021	1	1	1
biological_process	GO:0006469	negative regulation of protein kinase activity	0	6	0	0.372727	0.892889	1	1
biological_process	GO:0016571	histone methylation	0	2	0	0.484233	0.697775	1	1
biological_process	GO:0019243	methylglyoxal catabolic process to D-lactate via S-lactoyl-glutathione	0	4	0	0.444096	1	1	1
biological_process	GO:0006520	cellular amino acid metabolic process	0	4	0	0.00314015	0.998258	0.602	1
biological_process	GO:0006285	base-excision repair, AP site formation	0	4	0	0.362492	1	1	1
biological_process	GO:0006307	DNA dealkylation involved in DNA repair	0	2	0	0.666463	1	1	1
biological_process	GO:0035551	protein initiator methionine removal involved in protein maturation	0	2	0	0.666463	1	1	1
biological_process	GO:0046352	disaccharide catabolic process	0	6	0	0.563041	0.719575	1	1
biological_process	GO:0015768	maltose transport	0	1	0	0.81639	1	1	1
biological_process	GO:0015771	trehalose transport	0	1	0	0.81639	1	1	1
biological_process	GO:0000025	maltose catabolic process	0	7	0	0.241482	1	1	1
biological_process	GO:0006097	glyoxylate cycle	0	8	0	0.197084	1	1	1
biological_process	GO:0006735	NADH regeneration	0	1	0	0.911297	0.455954	1	1
biological_process	GO:0140053	mitochondrial gene expression	0	1	0	0.00255515	0.998828	0.53	1
biological_process	GO:0033615	mitochondrial proton-transporting ATP synthase complex assembly	0	11	0	0.107111	1	1	1
biological_process	GO:0070842	aggresome assembly	0	1	0	0.81639	1	1	1
biological_process	GO:1904667	negative regulation of ubiquitin protein ligase activity	0	5	0	0.362492	1	1	1
biological_process	GO:0070873	regulation of glycogen metabolic process	0	3	0	0.617926	0.628368	1	1
biological_process	GO:0000413	protein peptidyl-prolyl isomerization	0	11	0	0.0874021	1	1	1
biological_process	GO:0018022	peptidyl-lysine methylation	0	4	0	0.252965	0.868425	1	1
biological_process	GO:0098718	serine import across plasma membrane	0	2	0	0.666463	1	1	1
biological_process	GO:0016241	regulation of macroautophagy	0	3	0	0.929915	0.133545	1	1
biological_process	GO:0051403	stress-activated MAPK cascade	0	1	0	0.904246	0.223776	1	1
biological_process	GO:0009107	lipoate biosynthetic process	0	2	0	0.666463	1	1	1
biological_process	GO:0009249	protein lipoylation	0	5	0	0.362492	1	1	1
biological_process	GO:0019594	mannitol metabolic process	0	2	0	0.666463	1	1	1
biological_process	GO:0051131	chaperone-mediated protein complex assembly	0	10	0	0.131258	1	1	1
biological_process	GO:0006626	protein targeting to mitochondrion	0	10	0	0.0325833	0.987097	1	1
biological_process	GO:0035719	tRNA import into nucleus	0	3	0	0.544046	1	1	1
biological_process	GO:0019878	lysine biosynthetic process via aminoadipic acid	0	11	0	0.323904	0.912598	1	1
biological_process	GO:0035601	protein deacylation	0	1	0	0.971348	0.0695541	1	1
biological_process	GO:0002084	protein depalmitoylation	0	1	0	0.81639	1	1	1
biological_process	GO:1901089	acetate ester metabolic process involved in fermentation	0	2	0	0.666463	1	1	1
biological_process	GO:0008202	steroid metabolic process	0	1	0	0.0579496	0.977002	1	1
biological_process	GO:0034209	sterol acetylation	0	1	0	0.81639	1	1	1
biological_process	GO:0009074	aromatic amino acid family catabolic process	0	3	0	0.796162	0.436959	1	1
biological_process	GO:0070125	mitochondrial translational elongation	0	3	0	0.544046	1	1	1
biological_process	GO:0002926	tRNA wobble base 5-methoxycarbonylmethyl-2-thiouridinylation	0	2	0	0.666463	1	1	1
biological_process	GO:0046655	folic acid metabolic process	0	2	0	0.197084	1	1	1
biological_process	GO:0019264	glycine biosynthetic process from serine	0	2	0	0.666463	1	1	1
biological_process	GO:0006730	one-carbon metabolic process	0	14	0	0.111274	0.978971	1	1
biological_process	GO:0046653	tetrahydrofolate metabolic process	0	2	0	0.323904	0.912598	1	1
biological_process	GO:0070880	fungal-type cell wall beta-glucan biosynthetic process	0	5	0	0.131258	1	1	1
biological_process	GO:0000271	polysaccharide biosynthetic process	0	1	0	0.468878	0.677512	1	1
biological_process	GO:0010043	response to zinc ion	0	1	0	0.81639	1	1	1
biological_process	GO:0008645	hexose transmembrane transport	0	14	0	0.089567	0.975366	1	1
biological_process	GO:0009102	biotin biosynthetic process	0	6	0	0.29587	1	1	1
biological_process	GO:0006177	GMP biosynthetic process	0	4	0	0.29587	1	1	1
biological_process	GO:0006183	GTP biosynthetic process	0	4	0	0.444096	1	1	1
biological_process	GO:0015798	myo-inositol transport	0	2	0	0.666463	1	1	1
biological_process	GO:0006021	inositol biosynthetic process	0	3	0	0.544046	1	1	1
biological_process	GO:0006020	inositol metabolic process	0	5	0	0.241482	1	1	1
biological_process	GO:0000032	cell wall mannoprotein biosynthetic process	0	20	0	0.0171535	1	0.997	1
biological_process	GO:0046354	mannan biosynthetic process	0	2	0	0.666463	1	1	1
biological_process	GO:0035268	protein mannosylation	0	2	0	0.511129	0.758026	1	1
biological_process	GO:0097502	mannosylation	0	11	0	0.136098	0.958801	1	1
biological_process	GO:0010994	free ubiquitin chain polymerization	0	5	0	0.362492	1	1	1
biological_process	GO:0044395	protein targeting to vacuolar membrane	0	4	0	0.444096	1	1	1
biological_process	GO:0046039	GTP metabolic process	0	1	0	0.362492	1	1	1
biological_process	GO:0046041	ITP metabolic process	0	1	0	0.81639	1	1	1
biological_process	GO:0009142	nucleoside triphosphate biosynthetic process	0	2	0	0.0232936	0.994984	0.999	1
biological_process	GO:0046711	GDP biosynthetic process	0	1	0	0.81639	1	1	1
biological_process	GO:0006163	purine nucleotide metabolic process	0	2	0	0.000823744	0.99972	0.219	1
biological_process	GO:0043603	cellular amide metabolic process	0	1	0	7.13424e-12	1	0	1
biological_process	GO:0042180	cellular ketone metabolic process	0	2	0	0.214235	0.886145	1	1
biological_process	GO:0046177	D-gluconate catabolic process	0	3	0	0.544046	1	1	1
biological_process	GO:0044778	meiotic DNA integrity checkpoint signaling	0	2	0	0.666463	1	1	1
biological_process	GO:0045117	azole transmembrane transport	0	1	0	0.29587	1	1	1
biological_process	GO:0046656	folic acid biosynthetic process	0	6	0	0.29587	1	1	1
biological_process	GO:0008153	para-aminobenzoic acid biosynthetic process	0	1	0	0.81639	1	1	1
biological_process	GO:0046654	tetrahydrofolate biosynthetic process	0	5	0	0.362492	1	1	1
biological_process	GO:0018002	N-terminal peptidyl-glutamic acid acetylation	0	1	0	0.81639	1	1	1
biological_process	GO:0017198	N-terminal peptidyl-serine acetylation	0	2	0	0.666463	1	1	1
biological_process	GO:0061606	N-terminal protein amino acid propionylation	0	1	0	0.81639	1	1	1
biological_process	GO:0006833	water transport	0	4	0	0.444096	1	1	1
biological_process	GO:0006592	ornithine biosynthetic process	0	4	0	0.444096	1	1	1
biological_process	GO:0019547	arginine catabolic process to ornithine	0	1	0	0.81639	1	1	1
biological_process	GO:0090368	regulation of ornithine metabolic process	0	1	0	0.81639	1	1	1
biological_process	GO:0000050	urea cycle	0	2	0	0.666463	1	1	1
biological_process	GO:0072334	UDP-galactose transmembrane transport	0	1	0	0.81639	1	1	1
biological_process	GO:0015786	UDP-glucose transmembrane transport	0	3	0	0.544046	1	1	1
biological_process	GO:0015797	mannitol transport	0	4	0	0.444096	1	1	1
biological_process	GO:0015795	sorbitol transport	0	4	0	0.444096	1	1	1
biological_process	GO:1902341	xylitol transport	0	2	0	0.666463	1	1	1
biological_process	GO:1902596	negative regulation of DNA replication origin binding	0	2	0	0.666463	1	1	1
biological_process	GO:0046907	intracellular transport	0	2	0	0.925083	0.0902999	1	1
biological_process	GO:0006078	(1->6)-beta-D-glucan biosynthetic process	0	7	0	0.160841	1	1	1
biological_process	GO:0070525	tRNA threonylcarbamoyladenosine metabolic process	0	4	0	0.671742	0.627273	1	1
biological_process	GO:0071577	zinc ion transmembrane transport	0	7	0	0.241482	1	1	1
biological_process	GO:0006829	zinc ion transport	0	6	0	0.131258	1	1	1
biological_process	GO:0009731	detection of sucrose stimulus	0	1	0	0.81639	1	1	1
biological_process	GO:0007186	G protein-coupled receptor signaling pathway	0	5	0	0.836452	0.383162	1	1
biological_process	GO:0009745	sucrose mediated signaling	0	1	0	0.81639	1	1	1
biological_process	GO:0006488	dolichol-linked oligosaccharide biosynthetic process	0	10	0	0.131258	1	1	1
biological_process	GO:0048254	snoRNA localization	0	3	0	0.544046	1	1	1
biological_process	GO:1901565	organonitrogen compound catabolic process	0	2	0	0.136578	0.890746	1	1
biological_process	GO:0035965	cardiolipin acyl-chain remodeling	0	5	0	0.362492	1	1	1
biological_process	GO:0034453	microtubule anchoring	0	1	0	0.966316	0.333537	1	1
biological_process	GO:0045931	positive regulation of mitotic cell cycle	0	2	0	0.866455	0.230849	1	1
biological_process	GO:0098662	inorganic cation transmembrane transport	0	1	0	3.51042e-05	0.999992	0.013	1
biological_process	GO:0072710	response to hydroxyurea	0	1	0	0.81639	1	1	1
biological_process	GO:0000957	mitochondrial RNA catabolic process	0	2	0	0.544046	1	1	1
biological_process	GO:0061951	establishment of protein localization to plasma membrane	0	1	0	0.511129	0.758026	1	1
biological_process	GO:1903260	protein localization to mating projection tip	0	1	0	0.81639	1	1	1
biological_process	GO:0019284	L-methionine salvage from S-adenosylmethionine	0	4	0	0.444096	1	1	1
biological_process	GO:0016024	CDP-diacylglycerol biosynthetic process	0	5	0	0.362492	1	1	1
biological_process	GO:0034411	cell wall (1->3)-beta-D-glucan biosynthetic process	0	5	0	0.241482	1	1	1
biological_process	GO:0071970	fungal-type cell wall (1->3)-beta-D-glucan biosynthetic process	0	5	0	0.362492	1	1	1
biological_process	GO:0006074	(1->3)-beta-D-glucan metabolic process	0	1	0	0.873449	0.328258	1	1
biological_process	GO:0034396	negative regulation of transcription from RNA polymerase II promoter in response to iron	0	2	0	0.666463	1	1	1
biological_process	GO:1901684	arsenate ion transmembrane transport	0	2	0	0.666463	1	1	1
biological_process	GO:0098706	iron ion import across cell outer membrane	0	2	0	0.666463	1	1	1
biological_process	GO:0034755	iron ion transmembrane transport	0	5	0	0.160841	1	1	1
biological_process	GO:0006869	lipid transport	0	5	0	0.191179	0.882466	1	1
biological_process	GO:0044387	negative regulation of protein kinase activity by regulation of protein phosphorylation	0	2	0	0.666463	1	1	1
biological_process	GO:0061092	positive regulation of phospholipid translocation	0	1	0	0.81639	1	1	1
biological_process	GO:0032263	GMP salvage	0	2	0	0.666463	1	1	1
biological_process	GO:0046100	hypoxanthine metabolic process	0	2	0	0.544046	1	1	1
biological_process	GO:0032264	IMP salvage	0	3	0	0.544046	1	1	1
biological_process	GO:0032265	XMP salvage	0	2	0	0.666463	1	1	1
biological_process	GO:0006740	NADPH regeneration	0	4	0	0.0387337	1	1	1
biological_process	GO:0042542	response to hydrogen peroxide	0	6	0	0.485415	0.739205	1	1
biological_process	GO:0009396	folic acid-containing compound biosynthetic process	0	6	0	0.0874021	1	1	1
biological_process	GO:0046838	phosphorylated carbohydrate dephosphorylation	0	2	0	0.873449	0.328258	1	1
biological_process	GO:0010731	protein glutathionylation	0	3	0	0.544046	1	1	1
biological_process	GO:0015916	fatty-acyl-CoA transport	0	3	0	0.544046	1	1	1
biological_process	GO:0015910	long-chain fatty acid import into peroxisome	0	3	0	0.544046	1	1	1
biological_process	GO:0001676	long-chain fatty acid metabolic process	0	4	0	0.726753	0.572907	1	1
biological_process	GO:0042760	very long-chain fatty acid catabolic process	0	3	0	0.544046	1	1	1
biological_process	GO:0044772	mitotic cell cycle phase transition	0	9	0	0.976458	0.0356125	1	1
biological_process	GO:0035308	negative regulation of protein dephosphorylation	0	4	0	0.552274	0.802916	1	1
biological_process	GO:0045737	positive regulation of cyclin-dependent protein serine/threonine kinase activity	0	1	0	0.81639	1	1	1
biological_process	GO:0010696	positive regulation of mitotic spindle pole body separation	0	7	0	0.241482	1	1	1
biological_process	GO:0006744	ubiquinone biosynthetic process	0	13	0	0.152877	0.9684	1	1
biological_process	GO:0042773	ATP synthesis coupled electron transport	0	1	0	0.00242915	0.999764	0.517	1
biological_process	GO:0018063	cytochrome c-heme linkage	0	3	0	0.544046	1	1	1
biological_process	GO:0046281	cinnamic acid catabolic process	0	2	0	0.666463	1	1	1
biological_process	GO:1901067	ferulate catabolic process	0	1	0	0.81639	1	1	1
biological_process	GO:0033494	ferulate metabolic process	0	1	0	0.81639	1	1	1
biological_process	GO:1903424	fluoride transmembrane transport	0	2	0	0.666463	1	1	1
biological_process	GO:0034258	nicotinamide riboside transport	0	2	0	0.666463	1	1	1
biological_process	GO:0015851	nucleobase transport	0	7	0	0.131258	1	1	1
biological_process	GO:0015858	nucleoside transport	0	1	0	0.444096	1	1	1
biological_process	GO:0009594	detection of nutrient	0	2	0	0.666463	1	1	1
biological_process	GO:0031047	gene silencing by RNA	0	4	0	0.362492	1	1	1
biological_process	GO:0010621	negative regulation of transcription by transcription factor localization	0	1	0	0.81639	1	1	1
biological_process	GO:0006574	valine catabolic process	0	2	0	0.666463	1	1	1
biological_process	GO:1990383	cellular response to biotin starvation	0	1	0	0.81639	1	1	1
biological_process	GO:0071572	histone H3-K56 deacetylation	0	1	0	0.81639	1	1	1
biological_process	GO:1990679	histone H4-K12 deacetylation	0	1	0	0.81639	1	1	1
biological_process	GO:1990678	histone H4-K16 deacetylation	0	1	0	0.81639	1	1	1
biological_process	GO:0031508	pericentric heterochromatin assembly	0	1	0	0.81639	1	1	1
biological_process	GO:0006282	regulation of DNA repair	0	3	0	0.796066	0.378958	1	1
biological_process	GO:0009143	nucleoside triphosphate catabolic process	0	1	0	0.666463	1	1	1
biological_process	GO:0009217	purine deoxyribonucleoside triphosphate catabolic process	0	1	0	0.666463	1	1	1
biological_process	GO:0009213	pyrimidine deoxyribonucleoside triphosphate catabolic process	0	2	0	0.666463	1	1	1
biological_process	GO:0030149	sphingolipid catabolic process	0	2	0	0.362492	1	1	1
biological_process	GO:0006688	glycosphingolipid biosynthetic process	0	3	0	0.544046	1	1	1
biological_process	GO:0006676	mannosyl diphosphorylinositol ceramide metabolic process	0	4	0	0.444096	1	1	1
biological_process	GO:0051999	mannosyl-inositol phosphorylceramide biosynthetic process	0	2	0	0.666463	1	1	1
biological_process	GO:0046835	carbohydrate phosphorylation	0	1	0	0.666463	1	1	1
biological_process	GO:0033499	galactose catabolic process via UDP-galactose	0	5	0	0.362492	1	1	1
biological_process	GO:1990542	mitochondrial transmembrane transport	0	2	0	0.0680158	0.967064	1	1
biological_process	GO:0140300	serine import into mitochondrion	0	1	0	0.81639	1	1	1
biological_process	GO:0018283	iron incorporation into metallo-sulfur cluster	0	1	0	0.81639	1	1	1
biological_process	GO:0010040	response to iron(II) ion	0	1	0	0.81639	1	1	1
biological_process	GO:0007580	extrachromosomal circular DNA accumulation involved in cell aging	0	1	0	0.81639	1	1	1
biological_process	GO:0008156	negative regulation of DNA replication	0	3	0	0.996005	0.0168639	1	1
biological_process	GO:0045911	positive regulation of DNA recombination	0	1	0	0.6956	0.70413	1	1
biological_process	GO:0090342	regulation of cell aging	0	4	0	0.241482	1	1	1
biological_process	GO:0031582	replication fork arrest at rDNA repeats	0	1	0	0.81639	1	1	1
biological_process	GO:0006782	protoporphyrinogen IX biosynthetic process	0	7	0	0.241482	1	1	1
biological_process	GO:0070370	cellular heat acclimation	0	2	0	0.666463	1	1	1
biological_process	GO:0043335	protein unfolding	0	6	0	0.29587	1	1	1
biological_process	GO:0035617	stress granule disassembly	0	4	0	0.444096	1	1	1
biological_process	GO:0070414	trehalose metabolism in response to heat stress	0	1	0	0.81639	1	1	1
biological_process	GO:0006080	substituted mannan metabolic process	0	1	0	0.81639	1	1	1
biological_process	GO:1905184	positive regulation of protein serine/threonine phosphatase activity	0	2	0	0.666463	1	1	1
biological_process	GO:0032232	negative regulation of actin filament bundle assembly	0	1	0	0.666463	1	1	1
biological_process	GO:0001933	negative regulation of protein phosphorylation	0	5	0	0.208174	0.952524	1	1
biological_process	GO:0036149	phosphatidylinositol acyl-chain remodeling	0	2	0	0.666463	1	1	1
biological_process	GO:0033539	fatty acid beta-oxidation using acyl-CoA dehydrogenase	0	1	0	0.81639	1	1	1
biological_process	GO:0070452	positive regulation of ergosterol biosynthetic process	0	1	0	0.81639	1	1	1
biological_process	GO:0055074	calcium ion homeostasis	0	1	0	0.0061909	1	0.859	1
biological_process	GO:0071476	cellular hypotonic response	0	1	0	0.81639	1	1	1
biological_process	GO:0015883	FAD transport	0	4	0	0.444096	1	1	1
biological_process	GO:0006231	dTMP biosynthetic process	0	2	0	0.666463	1	1	1
biological_process	GO:0006226	dUMP biosynthetic process	0	2	0	0.666463	1	1	1
biological_process	GO:0032042	mitochondrial DNA metabolic process	0	4	0	0.726753	0.572907	1	1
biological_process	GO:0006102	isocitrate metabolic process	0	5	0	0.362492	1	1	1
biological_process	GO:0022900	electron transport chain	0	1	0	0.000969817	0.999915	0.24	1
biological_process	GO:0006556	S-adenosylmethionine biosynthetic process	0	3	0	0.544046	1	1	1
biological_process	GO:0061077	chaperone-mediated protein folding	0	8	0	0.0317347	0.992818	1	1
biological_process	GO:0010106	cellular response to iron ion starvation	0	3	0	0.92033	0.3044	1	1
biological_process	GO:0033215	reductive iron assimilation	0	6	0	0.29587	1	1	1
biological_process	GO:0046688	response to copper ion	0	5	0	0.362492	1	1	1
biological_process	GO:0000751	mitotic cell cycle G1 arrest in response to pheromone	0	3	0	0.544046	1	1	1
biological_process	GO:0072593	reactive oxygen species metabolic process	0	4	0	0.0474762	1	1	1
biological_process	GO:0016255	attachment of GPI anchor to protein	0	5	0	0.362492	1	1	1
biological_process	GO:0006542	glutamine biosynthetic process	0	1	0	0.81639	1	1	1
biological_process	GO:1990417	snoRNA release from pre-rRNA	0	1	0	0.81639	1	1	1
biological_process	GO:0008204	ergosterol metabolic process	0	4	0	0.0369699	0.991415	1	1
biological_process	GO:0006694	steroid biosynthetic process	0	1	0	0.117425	0.952195	1	1
biological_process	GO:0000162	tryptophan biosynthetic process	0	6	0	0.29587	1	1	1
biological_process	GO:0032917	polyamine acetylation	0	1	0	0.81639	1	1	1
biological_process	GO:0006083	acetate metabolic process	0	2	0	0.552274	0.802916	1	1
biological_process	GO:0046874	quinolinate metabolic process	0	1	0	0.843898	0.555904	1	1
biological_process	GO:0006880	intracellular sequestering of iron ion	0	3	0	0.544046	1	1	1
biological_process	GO:0006529	asparagine biosynthetic process	0	3	0	0.444096	1	1	1
biological_process	GO:0070981	L-asparagine biosynthetic process	0	2	0	0.666463	1	1	1
biological_process	GO:0090374	oligopeptide export from mitochondrion	0	2	0	0.666463	1	1	1
biological_process	GO:0071585	detoxification of cadmium ion	0	2	0	0.666463	1	1	1
biological_process	GO:0010273	detoxification of copper ion	0	2	0	0.666463	1	1	1
biological_process	GO:2000617	positive regulation of histone H3-K9 acetylation	0	2	0	0.666463	1	1	1
biological_process	GO:0098841	protein localization to cell division site after cytokinesis	0	2	0	0.666463	1	1	1
biological_process	GO:0044211	CTP salvage	0	2	0	0.666463	1	1	1
biological_process	GO:0002184	cytoplasmic translational termination	0	2	0	0.666463	1	1	1
biological_process	GO:0009134	nucleoside diphosphate catabolic process	0	2	0	0.666463	1	1	1
biological_process	GO:0034394	protein localization to cell surface	0	3	0	0.544046	1	1	1
biological_process	GO:0006048	UDP-N-acetylglucosamine biosynthetic process	0	5	0	0.29587	1	1	1
biological_process	GO:0071701	regulation of MAPK export from nucleus	0	2	0	0.666463	1	1	1
biological_process	GO:0030261	chromosome condensation	0	3	0	0.796066	0.378958	1	1
[truncated: 4,055 more rows]
[truncated: 400 more columns]

## Sheet: polyQ
GO domain	GO ID	GO term	polyQ protein	total number	number / total	raw p-value under-representation	raw p-value over-representation	FWER under-representation	FWER over-representation	Gene Name
biological_process	GO:0045944	positive regulation of transcription by RNA polymerase II	55	229	0.240175	1	4.21955e-21	1	0	SOK2_YEAST	SSN2_YEAST	OPI1_YEAST	REB1_YEAST	TAF5_YEAST	SNF5_YEAST	SIP4_YEAST	SNF6_YEAST	SFL1_YEAST	SFP1_YEAST	SNF2_YEAST	SWI1_YEAST	HOG1_YEAST	HDA1_YEAST	MED2_YEAST	CYC8_YEAST	ASG1_YEAST	ATAD2_YEAST	MOT3_YEAST	MSS11_YEAST	MED15_YEAST	MIG1_YEAST	GTS1_YEAST	RLM1_YEAST	ACA2_YEAST	POG1_YEAST	MED3_YEAST	RPN4_YEAST	SKS1_YEAST	SIN3_YEAST	SET1_YEAST	SWI6_YEAST	PACC_YEAST	RGT1_YEAST	TAF12_YEAST	MSN2_YEAST	TAF1_YEAST	STP1_YEAST	PHO2_YEAST	YHX7_YEAST
biological_process	GO:0006357	regulation of transcription by RNA polymerase II	48	177	0.271186	1	2.2542e-24	1	0	SSL1_YEAST	SSN2_YEAST	USV1_YEAST	OPI1_YEAST	REB1_YEAST	TAF5_YEAST	SNF5_YEAST	RT102_YEAST	SNF6_YEAST	SFL1_YEAST	SPT20_YEAST	SNF2_YEAST	SWI1_YEAST	HAP2_YEAST	HOG1_YEAST	GAT2_YEAST	IFH1_YEAST	CYC8_YEAST	CCR4_YEAST	EPL1_YEAST	FKH2_YEAST	CAF4_YEAST	GTS1_YEAST	HMS2_YEAST	NOT1_YEAST	ROX1_YEAST	RLM1_YEAST	SGF73_YEAST	SWI5_YEAST	SKN7_YEAST	STP4_YEAST	TAF12_YEAST	MGA1_YEAST	MSN2_YEAST	RSF2_YEAST	STP1_YEAST	PHO2_YEAST	YP022_YEAST	TAF10_YEAST	UPC2_YEAST
biological_process	GO:0000122	negative regulation of transcription by RNA polymerase II	28	118	0.237288	1	8.51046e-08	1	0	SSN2_YEAST	OPI1_YEAST	SFL1_YEAST	BMH1_YEAST	HDA1_YEAST	MED2_YEAST	DATI_YEAST	IXR1_YEAST	CYC8_YEAST	ATAD2_YEAST	MOT3_YEAST	MED15_YEAST	MIG1_YEAST	ROX1_YEAST	MED3_YEAST	RPN4_YEAST	SIN3_YEAST	SET1_YEAST	SWC4_YEAST	PACC_YEAST	RGT1_YEAST	SSN3_YEAST	YC16_YEAST	TUP1_YEAST	UME6_YEAST	MCM1_YEAST	MIG2_YEAST	CLA4_YEAST
biological_process	GO:0007124	pseudohyphal growth	15	51	0.294118	1	8.71094e-08	1	0	SOK2_YEAST	BMH1_YEAST	MDS3_YEAST	GPA2_YEAST	HMS1_YEAST	PAM1_YEAST	HMS2_YEAST	NOT1_YEAST	SKS1_YEAST	MGA1_YEAST	OSH3_YEAST	WHI3_YEAST	UME6_YEAST	IME1_YEAST	BMH2_YEAST
biological_process	GO:0006355	regulation of transcription, DNA-templated	12	69	0.173913	1	4.88778e-26	1	0	REB1_YEAST	PFD5_YEAST	T2FB_YEAST	SWI4_YEAST	SWI6_YEAST	SET3_YEAST	SEF1_YEAST	RSF2_YEAST	NUP53_YEAST	NUP59_YEAST	HAP5_YEAST	CRZ1_YEAST
biological_process	GO:0006351	transcription, DNA-templated	9	28	0.321429	1	1.18217e-25	1	0	ASG1_YEAST	CHA4_YEAST	SEF1_YEAST	RSF2_YEAST	YP022_YEAST	YL278_YEAST	HAL9_YEAST	HAP1_YEAST	GAL4_YEAST
biological_process	GO:0006366	transcription by RNA polymerase II	8	53	0.150943	1	1.24064e-25	1	0	SSL1_YEAST	TAF5_YEAST	TAF12_YEAST	TAF1_YEAST	RSF1_YEAST	TAF10_YEAST	TAF11_YEAST	RAD25_YEAST
biological_process	GO:0000436	carbon catabolite activation of transcription from RNA polymerase II promoter	6	9	0.666667	1	1.89961e-07	1	0	USV1_YEAST	SNF5_YEAST	SWI1_YEAST	HAP2_YEAST	HAP5_YEAST	HAP1_YEAST
biological_process	GO:0045893	positive regulation of transcription, DNA-templated	6	18	0.333333	1	3.16588e-23	1	0	CHA4_YEAST	NU100_YEAST	STP1_YEAST	WHI3_YEAST	NUP53_YEAST	YAK1_YEAST
biological_process	GO:0043618	regulation of transcription from RNA polymerase II promoter in response to stress	2	8	0.25	1	4.44593e-07	1	0	ACA2_YEAST	SET1_YEAST
biological_process	GO:0010468	regulation of gene expression	2	19	0.105263	1	1.24999e-30	1	0	CYC8_YEAST	CLA4_YEAST
biological_process	GO:0006402	mRNA catabolic process	2	7	0.285714	1	3.69732e-07	1	0	SSD1_YEAST	EAP1_YEAST
biological_process	GO:0010629	negative regulation of gene expression	2	8	0.25	1	3.0524e-07	1	0	SET1_YEAST	CLA4_YEAST
biological_process	GO:0030447	filamentous growth	1	15	0.0666667	1	9.52485e-11	1	0	GAL83_YEAST
biological_process	GO:0080090	regulation of primary metabolic process	1	5	0.2	1	3.50853e-27	1	0	GAL83_YEAST
biological_process	GO:0040008	regulation of growth	1	2	0.5	1	5.03423e-08	1	0	EAP1_YEAST
biological_process	GO:0006139	nucleobase-containing compound metabolic process	0	5	0	1	3.80228e-09	1	0
biological_process	GO:0051252	regulation of RNA metabolic process	0	2	0	1	1.81006e-29	1	0
biological_process	GO:0016070	RNA metabolic process	0	6	0	1	2.53649e-16	1	0
biological_process	GO:0006725	cellular aromatic compound metabolic process	0	2	0	1	2.63384e-08	1	0
biological_process	GO:0044182	filamentous growth of a population of unicellular organisms	0	2	0	1	5.44208e-11	1	0
biological_process	GO:0043620	regulation of DNA-templated transcription in response to stress	0	1	0	1	5.87425e-07	1	0
biological_process	GO:0007584	response to nutrient	0	4	0	1	1.29722e-07	1	0
biological_process	GO:0000429	carbon catabolite regulation of transcription from RNA polymerase II promoter	0	1	0	1	5.00942e-08	1	0
biological_process	GO:0019222	regulation of metabolic process	0	2	0	1	2.70762e-29	1	0
biological_process	GO:0010570	regulation of filamentous growth	0	2	0	1	4.72381e-07	1	0
biological_process	GO:0051173	positive regulation of nitrogen compound metabolic process	0	1	0	1	2.44476e-23	1	0
biological_process	GO:0032774	RNA biosynthetic process	0	2	0	1	2.6593e-25	1	0
biological_process	GO:0044271	cellular nitrogen compound biosynthetic process	0	1	0	1	2.6618e-11	1	0
biological_process	GO:0031670	cellular response to nutrient	0	1	0	1	1.83876e-07	1	0
biological_process	GO:0006897	endocytosis	21	100	0.21	1	1.167e-06	1	0.001	RV167_YEAST	EDE1_YEAST	HRR25_YEAST	AP3M_YEAST	ENT1_YEAST	KC11_YEAST	KC12_YEAST	AP18A_YEAST	ATC5_YEAST	ENT2_YEAST	GTS1_YEAST	SLA1_YEAST	SLA2_YEAST	PAN1_YEAST	SCD5_YEAST	OSH3_YEAST	UBP4_YEAST	SVL3_YEAST	TLG2_YEAST	WHI2_YEAST	AP18B_YEAST
biological_process	GO:0051028	mRNA transport	5	32	0.15625	1	6.88047e-07	1	0.001	NUP57_YEAST	PABP_YEAST	NUP53_YEAST	NU170_YEAST	DHH1_YEAST
biological_process	GO:0007049	cell cycle	20	95	0.210526	0.999999	1.54232e-06	1	0.002	SLD7_YEAST	SPC25_YEAST	CDC13_YEAST	EPL1_YEAST	LDB19_YEAST	MOB2_YEAST	NET1_YEAST	MCM10_YEAST	SML1_YEAST	PAT1_YEAST	SSD1_YEAST	WHI3_YEAST	WHI2_YEAST	NUP53_YEAST	NUP59_YEAST	RAD53_YEAST	MCM1_YEAST	CKS1_YEAST	GID8_YEAST	DBF2_YEAST
biological_process	GO:0006406	mRNA export from nucleus	9	32	0.28125	1	1.73382e-06	1	0.002	MLP1_YEAST	MEX67_YEAST	NU116_YEAST	NU100_YEAST	SGF73_YEAST	SAC3_YEAST	XPO1_YEAST	ZDS1_YEAST	GFD1_YEAST
biological_process	GO:0000956	nuclear-transcribed mRNA catabolic process	2	16	0.125	1	1.64887e-06	1	0.002	PUF3_YEAST	VTS1_YEAST
biological_process	GO:2000217	regulation of invasive growth in response to glucose limitation	2	5	0.4	1	2.2625e-06	1	0.003	TUP1_YEAST	GAL83_YEAST
biological_process	GO:0051726	regulation of cell cycle	1	19	0.0526316	0.999998	4.13668e-06	1	0.004	NOT1_YEAST
biological_process	GO:0000288	nuclear-transcribed mRNA catabolic process, deadenylation-dependent decay	6	12	0.5	0.999999	6.4441e-06	1	0.005	JSN1_YEAST	CCR4_YEAST	NOT1_YEAST	PUF2_YEAST	PUF3_YEAST	ERF3_YEAST
biological_process	GO:0043488	regulation of mRNA stability	2	4	0.5	0.999999	4.77471e-06	1	0.005	PUB1_YEAST	NAB2_YEAST
biological_process	GO:0061013	regulation of mRNA catabolic process	1	2	0.5	0.999998	7.00227e-06	1	0.005	WHI3_YEAST
biological_process	GO:0009058	biosynthetic process	0	4	0	0.999996	6.52013e-06	1	0.005
biological_process	GO:0043487	regulation of RNA stability	0	1	0	0.999999	5.79283e-06	1	0.005
biological_process	GO:0034613	cellular protein localization	7	27	0.259259	0.999996	8.31411e-06	1	0.007	BMH1_YEAST	HAL5_YEAST	PPZ1_YEAST	SML1_YEAST	RAX1_YEAST	DIF1_YEAST	BMH2_YEAST
biological_process	GO:0008104	protein localization	3	14	0.214286	0.999995	8.99489e-06	1	0.007	STI1_YEAST	RAX1_YEAST	RAD53_YEAST
biological_process	GO:0045892	negative regulation of transcription, DNA-templated	2	9	0.222222	0.999997	8.46982e-06	1	0.007	CYC8_YEAST	TUP1_YEAST
biological_process	GO:0036003	positive regulation of transcription from RNA polymerase II promoter in response to stress	2	9	0.222222	0.999999	8.26734e-06	1	0.007	RLM1_YEAST	RPN4_YEAST
biological_process	GO:0061157	mRNA destabilization	1	6	0.166667	0.999997	1.24463e-05	1	0.01	WHI3_YEAST
biological_process	GO:0009991	response to extracellular stimulus	1	1	1	0.999994	1.72693e-05	1	0.011	WHI5_YEAST
biological_process	GO:0006401	RNA catabolic process	0	20	0	0.999995	1.49838e-05	1	0.011
biological_process	GO:0006468	protein phosphorylation	27	138	0.195652	0.99999	2.6331e-05	1	0.016	SSN2_YEAST	PBS2_YEAST	HRK1_YEAST	HOG1_YEAST	KAPB_YEAST	HAL5_YEAST	HRR25_YEAST	IFH1_YEAST	KC11_YEAST	KC12_YEAST	KIN1_YEAST	KIN2_YEAST	KIN3_YEAST	MOB2_YEAST	DBF4_YEAST	SKS1_YEAST	SSN3_YEAST	SLT2_YEAST	YAK1_YEAST	RAD53_YEAST	ATG1_YEAST	ALK1_YEAST	CBK1_YEAST	CLA4_YEAST	GAL83_YEAST	AKL1_YEAST	DBF2_YEAST
biological_process	GO:0016192	vesicle-mediated transport	5	69	0.0724638	0.999986	2.80977e-05	1	0.016	SYT1_YEAST	RV167_YEAST	AP3M_YEAST	RAEP_YEAST	RCR1_YEAST
biological_process	GO:0000147	actin cortical patch assembly	7	15	0.466667	0.999998	3.10629e-05	1	0.022	ENT1_YEAST	ENT2_YEAST	SLA1_YEAST	SLA2_YEAST	PAN1_YEAST	AKL1_YEAST	AIM3_YEAST
biological_process	GO:0061408	positive regulation of transcription from RNA polymerase II promoter in response to heat stress	7	15	0.466667	0.999998	3.10629e-05	1	0.022	PSR1_YEAST	SIN3_YEAST	SWI4_YEAST	SWI6_YEAST	MSN2_YEAST	WHI2_YEAST	YAK1_YEAST
biological_process	GO:0006999	nuclear pore organization	6	14	0.428571	0.999997	3.23821e-05	1	0.023	NUP49_YEAST	NU116_YEAST	NU188_YEAST	NUP57_YEAST	NUP53_YEAST	NUP59_YEAST
biological_process	GO:0017148	negative regulation of translation	3	17	0.176471	0.999991	3.32229e-05	1	0.023	SSD1_YEAST	DHH1_YEAST	EAP1_YEAST
biological_process	GO:0006403	RNA localization	0	1	0	0.999988	3.53512e-05	1	0.023
biological_process	GO:0060258	negative regulation of filamentous growth	1	1	1	0.999998	3.90953e-05	1	0.026	SSN3_YEAST
biological_process	GO:0006405	RNA export from nucleus	4	10	0.4	0.99998	7.1256e-05	1	0.04	NU116_YEAST	NU188_YEAST	NU100_YEAST	NU170_YEAST
biological_process	GO:0007165	signal transduction	7	45	0.155556	0.999963	7.38706e-05	1	0.047	BMH1_YEAST	GPA2_YEAST	MOB2_YEAST	RLM1_YEAST	SLT2_YEAST	BMH2_YEAST	GAL83_YEAST
biological_process	GO:0032268	regulation of cellular protein metabolic process	0	1	0	0.999961	8.24952e-05	1	0.055
biological_process	GO:0031494	regulation of mating type switching	1	1	1	0.999998	0.00011266	1	0.08	MCM1_YEAST
biological_process	GO:0006807	nitrogen compound metabolic process	0	8	0	0.999924	0.000120559	1	0.08
biological_process	GO:0031669	cellular response to nutrient levels	0	5	0	0.99996	0.00011736	1	0.08
biological_process	GO:0006606	protein import into nucleus	11	55	0.2	0.999964	0.000146289	1	0.097	PBS2_YEAST	KA122_YEAST	NUP49_YEAST	MLP1_YEAST	GSP1_YEAST	NU116_YEAST	NU188_YEAST	NU100_YEAST	NUP57_YEAST	NUP53_YEAST	NU170_YEAST
biological_process	GO:0044396	actin cortical patch organization	3	12	0.25	0.999981	0.000147292	1	0.098	EDE1_YEAST	SLA1_YEAST	PAN1_YEAST
biological_process	GO:0030866	cortical actin cytoskeleton organization	2	8	0.25	0.999967	0.000153914	1	0.102	SCD5_YEAST	STT4_YEAST
biological_process	GO:0045787	positive regulation of cell cycle	0	1	0	0.999955	0.000155448	1	0.102
biological_process	GO:0007015	actin filament organization	7	39	0.179487	0.999954	0.000165291	1	0.113	PBS2_YEAST	ENT1_YEAST	ENT2_YEAST	SLA2_YEAST	WHI2_YEAST	BOI2_YEAST	AKL1_YEAST
biological_process	GO:0019439	aromatic compound catabolic process	0	1	0	0.99989	0.000257878	1	0.147
biological_process	GO:0030865	cortical cytoskeleton organization	0	4	0	0.999937	0.000274442	1	0.15
biological_process	GO:0015931	nucleobase-containing compound transport	0	1	0	0.999885	0.000287145	1	0.159
biological_process	GO:0001403	invasive growth in response to glucose limitation	5	43	0.116279	0.999922	0.00032928	1	0.218	KAPB_YEAST	GPA2_YEAST	OSH3_YEAST	WHI3_YEAST	GAL83_YEAST
biological_process	GO:0010608	posttranscriptional regulation of gene expression	1	3	0.333333	0.999857	0.000339969	1	0.236	PUF3_YEAST
biological_process	GO:0097201	negative regulation of transcription from RNA polymerase II promoter in response to stress	2	2	1	1	0.000342685	1	0.29	ROX1_YEAST	RPN4_YEAST
biological_process	GO:0010811	positive regulation of cell-substrate adhesion	2	2	1	1	0.000342685	1	0.29	WHI3_YEAST	YAK1_YEAST
biological_process	GO:0034976	response to endoplasmic reticulum stress	3	15	0.2	0.999883	0.000382465	1	0.297	SYT1_YEAST	RTN1_YEAST	SLT2_YEAST
biological_process	GO:0051170	import into nucleus	0	1	0	0.999894	0.000383535	1	0.297
biological_process	GO:1900430	positive regulation of filamentous growth of a population of unicellular organisms	0	1	0	0.999951	0.000387941	1	0.3
biological_process	GO:0000278	mitotic cell cycle	2	24	0.0833333	0.999795	0.000397328	1	0.303	SAC3_YEAST	ALK1_YEAST
biological_process	GO:0035556	intracellular signal transduction	11	61	0.180328	0.999772	0.00046639	1	0.316	HRK1_YEAST	HOG1_YEAST	HAL5_YEAST	KIN1_YEAST	KIN2_YEAST	SKS1_YEAST	SLT2_YEAST	ALK1_YEAST	CBK1_YEAST	CLA4_YEAST	DBF2_YEAST
biological_process	GO:0045931	positive regulation of mitotic cell cycle	0	2	0	0.999897	0.000492717	1	0.324
biological_process	GO:0072583	clathrin-dependent endocytosis	3	9	0.333333	0.999948	0.00050074	1	0.333	AP2A_YEAST	AP18A_YEAST	AP18B_YEAST
biological_process	GO:0018105	peptidyl-serine phosphorylation	10	47	0.212766	0.999875	0.000539298	1	0.359	HOG1_YEAST	HRR25_YEAST	KC11_YEAST	KC12_YEAST	KIN1_YEAST	KIN2_YEAST	YAK1_YEAST	ATG1_YEAST	CBK1_YEAST	DBF2_YEAST
biological_process	GO:0016310	phosphorylation	0	8	0	0.999723	0.000582868	1	0.365
biological_process	GO:0046907	intracellular transport	0	2	0	0.999624	0.000625445	1	0.368
biological_process	GO:0036267	invasive filamentous growth	0	4	0	0.999832	0.000650717	1	0.381
biological_process	GO:2000219	positive regulation of invasive growth in response to glucose limitation	4	7	0.571429	0.999969	0.000703724	1	0.424	SNF5_YEAST	SNF2_YEAST	ATAD2_YEAST	MED15_YEAST
biological_process	GO:0030847	termination of RNA polymerase II transcription, exosome-dependent	4	7	0.571429	0.999969	0.000703724	1	0.424	NRD1_YEAST	PTI1_YEAST	PCF11_YEAST	NAB3_YEAST
biological_process	GO:0034316	negative regulation of Arp2/3 complex-mediated actin nucleation	4	7	0.571429	0.999969	0.000703724	1	0.424	LSB1_YEAST	SLA1_YEAST	SLA2_YEAST	PIN3_YEAST
biological_process	GO:0036498	IRE1-mediated unfolded protein response	2	5	0.4	0.999969	0.000703724	1	0.424	SPT20_YEAST	SLT2_YEAST
biological_process	GO:0006417	regulation of translation	2	22	0.0909091	0.999685	0.000732261	1	0.435	SLF1_YEAST	SRO9_YEAST
biological_process	GO:0016973	poly(A)+ mRNA export from nucleus	9	37	0.243243	0.99984	0.000796019	1	0.445	NUP49_YEAST	MLP1_YEAST	GSP1_YEAST	MEX67_YEAST	NU116_YEAST	PIN4_YEAST	THO1_YEAST	RAD25_YEAST	NAB2_YEAST
biological_process	GO:0010033	response to organic substance	0	1	0	0.999587	0.000858234	1	0.453
biological_process	GO:0042173	regulation of sporulation resulting in formation of a cellular spore	3	4	0.75	0.999926	0.000867226	1	0.469	RSC2_YEAST	UME6_YEAST	IME1_YEAST
biological_process	GO:0007155	cell adhesion	1	4	0.25	0.999853	0.000960788	1	0.478	GAL83_YEAST
biological_process	GO:0000082	G1/S transition of mitotic cell cycle	5	30	0.166667	0.999718	0.00097288	1	0.479	MSA1_YEAST	GRR1_YEAST	SWI4_YEAST	SWI6_YEAST	SA155_YEAST
biological_process	GO:0006997	nucleus organization	1	4	0.25	0.999718	0.00097288	1	0.479	GSP1_YEAST
biological_process	GO:0030029	actin filament-based process	1	2	0.5	0.999606	0.000974465	1	0.479	SAC3_YEAST
biological_process	GO:0000083	regulation of transcription involved in G1/S transition of mitotic cell cycle	3	17	0.176471	0.999812	0.0010227	1	0.492	MSA1_YEAST	SWI5_YEAST	MSA2_YEAST
biological_process	GO:0044772	mitotic cell cycle phase transition	0	9	0	0.999555	0.00102864	1	0.492
biological_process	GO:0006886	intracellular protein transport	10	98	0.102041	0.999353	0.00115722	1	0.517	SEC24_YEAST	AP2A_YEAST	ATC5_YEAST	COPB2_YEAST	SFB2_YEAST	STX8_YEAST	YPT11_YEAST	TLG2_YEAST	VAM7_YEAST	VAM3_YEAST
biological_process	GO:0006325	chromatin organization	9	64	0.140625	0.999367	0.00121218	1	0.523	TAF5_YEAST	SPT20_YEAST	HDA1_YEAST	SGF73_YEAST	SET3_YEAST	TAF12_YEAST	TAF1_YEAST	TAF10_YEAST	EAF1_YEAST
biological_process	GO:0031496	positive regulation of mating type switching	3	4	0.75	0.999976	0.00129917	1	0.63	SNF2_YEAST	SWI1_YEAST	SWI5_YEAST
biological_process	GO:0048268	clathrin coat assembly	3	4	0.75	0.999976	0.00129917	1	0.63	AP18A_YEAST	SLA2_YEAST	AP18B_YEAST
biological_process	GO:0060256	regulation of flocculation	3	3	1	0.999976	0.00129917	1	0.63	RLM1_YEAST	SLT2_YEAST	TUP1_YEAST
biological_process	GO:0007089	traversing start control point of mitotic cell cycle	5	13	0.384615	0.999871	0.00132885	1	0.641	MSA1_YEAST	CCR4_YEAST	WHI5_YEAST	WHI3_YEAST	GID8_YEAST
biological_process	GO:0036228	protein localization to nuclear inner membrane	4	8	0.5	0.999922	0.00132981	1	0.668	NUP49_YEAST	NU100_YEAST	NUP57_YEAST	NU170_YEAST
biological_process	GO:0051126	negative regulation of actin nucleation	0	1	0	0.999922	0.00132981	1	0.668
biological_process	GO:0016071	mRNA metabolic process	0	5	0	0.999244	0.00143298	1	0.68
biological_process	GO:0016050	vesicle organization	0	11	0	0.999499	0.00143182	1	0.68
biological_process	GO:0060627	regulation of vesicle-mediated transport	0	3	0	0.999607	0.00146915	1	0.684
biological_process	GO:0006898	receptor-mediated endocytosis	1	7	0.142857	0.999724	0.00161598	1	0.704	AP2A_YEAST
biological_process	GO:0034504	protein localization to nucleus	0	4	0	0.999437	0.00164809	1	0.705
biological_process	GO:0030036	actin cytoskeleton organization	2	27	0.0740741	0.999185	0.0019412	1	0.728	SLM2_YEAST	SLM1_YEAST
biological_process	GO:0034315	regulation of Arp2/3 complex-mediated actin nucleation	1	2	0.5	0.999788	0.00194938	1	0.751	SLA1_YEAST
biological_process	GO:0006913	nucleocytoplasmic transport	1	15	0.0666667	0.999124	0.00195893	1	0.754	NU170_YEAST
biological_process	GO:0051123	RNA polymerase II preinitiation complex assembly	10	46	0.217391	0.999447	0.00197937	1	0.756	TAF5_YEAST	MED2_YEAST	DAL81_YEAST	MED15_YEAST	MED3_YEAST	T2FB_YEAST	TAF12_YEAST	TAF1_YEAST	TAF10_YEAST	TAF11_YEAST
biological_process	GO:0043933	protein-containing complex organization	0	1	0	0.998724	0.00204355	1	0.756
biological_process	GO:0006338	chromatin remodeling	17	91	0.186813	0.999026	0.00209227	1	0.768	SNF5_YEAST	RSC2_YEAST	RSC4_YEAST	RT102_YEAST	SNF6_YEAST	SNF2_YEAST	SWI1_YEAST	DLS1_YEAST	IOC2_YEAST	CYC8_YEAST	FKH2_YEAST	ATAD2_YEAST	SWC4_YEAST	MSN2_YEAST	PHO2_YEAST	SWC5_YEAST	UME6_YEAST
biological_process	GO:2000221	negative regulation of pseudohyphal growth	4	9	0.444444	0.999835	0.00226193	1	0.793	FKH2_YEAST	IME4_YEAST	MUM2_YEAST	DIG1_YEAST
biological_process	GO:0030041	actin filament polymerization	0	3	0	0.999488	0.00238274	1	0.802
biological_process	GO:0030833	regulation of actin filament polymerization	0	7	0	0.999488	0.00238274	1	0.802
biological_process	GO:0034605	cellular response to heat	0	26	0	0.999355	0.00242703	1	0.806
biological_process	GO:0008361	regulation of cell size	7	27	0.259259	0.999515	0.00257483	1	0.824	SFP1_YEAST	KA122_YEAST	GPA2_YEAST	SKN7_YEAST	SLT2_YEAST	WHI5_YEAST	WHI3_YEAST
biological_process	GO:0033365	protein localization to organelle	0	1	0	0.998441	0.0026667	1	0.825
biological_process	GO:0000289	nuclear-transcribed mRNA poly(A) tail shortening	4	10	0.4	0.999668	0.00275786	1	0.842	CCR4_YEAST	NOT1_YEAST	POP2_YEAST	VTS1_YEAST
biological_process	GO:0043937	regulation of sporulation	0	3	0	0.999668	0.00275786	1	0.842
biological_process	GO:0015031	protein transport	10	153	0.0653595	0.998182	0.00292731	1	0.848	TIP20_YEAST	SEC16_YEAST	SEC3_YEAST	LDB19_YEAST	SEC9_YEAST	SEC7_YEAST	SCJ1_YEAST	VTS1_YEAST	GFD1_YEAST	CSR2_YEAST
biological_process	GO:0032386	regulation of intracellular transport	0	2	0	0.999268	0.00293023	1	0.848
biological_process	GO:0061412	positive regulation of transcription from RNA polymerase II promoter in response to amino acid starvation	3	5	0.6	0.999887	0.00307893	1	0.904	SNF2_YEAST	SWI1_YEAST	MSN2_YEAST
biological_process	GO:0071456	cellular response to hypoxia	2	2	1	0.999887	0.00307893	1	0.904	IXR1_YEAST	UPC2_YEAST
biological_process	GO:0000117	regulation of transcription involved in G2/M transition of mitotic cell cycle	1	2	0.5	0.999887	0.00307893	1	0.904	SIN3_YEAST
biological_process	GO:0051301	cell division	18	167	0.107784	0.998303	0.00319711	1	0.906	SMC1_YEAST	SPC25_YEAST	CDC13_YEAST	AMA1_YEAST	CDC27_YEAST	DSN1_YEAST	MOB2_YEAST	DBF4_YEAST	NET1_YEAST	POG1_YEAST	SIN3_YEAST	PAT1_YEAST	SSD1_YEAST	NUP53_YEAST	NUP59_YEAST	APC1_YEAST	CKS1_YEAST	CIN8_YEAST
biological_process	GO:0006900	vesicle budding from membrane	2	6	0.333333	0.99937	0.00319367	1	0.906	AP18A_YEAST	AP18B_YEAST
biological_process	GO:0006914	autophagy	3	45	0.0666667	0.99834	0.00338125	1	0.913	TIP20_YEAST	ATG13_YEAST	ATG1_YEAST
biological_process	GO:0071166	ribonucleoprotein complex localization	1	1	1	0.998653	0.00329596	1	0.913	CDC13_YEAST
biological_process	GO:0045184	establishment of protein localization	0	8	0	0.99792	0.00330617	1	0.913
biological_process	GO:1901992	positive regulation of mitotic cell cycle phase transition	0	3	0	0.999204	0.00345526	1	0.916
biological_process	GO:0008154	actin polymerization or depolymerization	0	1	0	0.999204	0.00345526	1	0.916
biological_process	GO:0008152	metabolic process	0	2	0	0.997581	0.00358253	1	0.925
biological_process	GO:0006972	hyperosmotic response	5	10	0.5	0.999499	0.00378383	1	0.934	PBS2_YEAST	HOG1_YEAST	CYC8_YEAST	MSB2_YEAST	TUP1_YEAST
biological_process	GO:0033962	P-body assembly	3	6	0.5	0.999499	0.00378383	1	0.934	PAT1_YEAST	DHH1_YEAST	EDC3_YEAST
biological_process	GO:0009306	protein secretion	5	19	0.263158	0.999276	0.00414698	1	0.945	HSE1_YEAST	GRH1_YEAST	SCD5_YEAST	TLG2_YEAST	VPS27_YEAST
biological_process	GO:0031124	mRNA 3'-end processing	3	23	0.130435	0.998735	0.00467381	1	0.949	NRD1_YEAST	SAC3_YEAST	NAB3_YEAST
biological_process	GO:0031503	protein-containing complex localization	2	14	0.142857	0.99776	0.00489971	1	0.954	JSN1_YEAST	TRS33_YEAST
biological_process	GO:0006607	NLS-bearing protein import into nucleus	5	17	0.294118	0.999271	0.00505683	1	0.99	NUP49_YEAST	NU100_YEAST	NUP57_YEAST	NUP53_YEAST	NUP59_YEAST
biological_process	GO:1903896	positive regulation of IRE1-mediated unfolded protein response	2	2	1	1	0.0049096	1	0.99	KIN1_YEAST	KIN2_YEAST
biological_process	GO:0071483	cellular response to blue light	2	2	1	1	0.0049096	1	0.99	MSN2_YEAST	CRZ1_YEAST
biological_process	GO:0061909	autophagosome-lysosome fusion	2	2	1	1	0.0049096	1	0.99	STT4_YEAST	VAM7_YEAST
biological_process	GO:0051351	positive regulation of ligase activity	1	1	1	1	0.0049096	1	0.99	ARC1_YEAST
biological_process	GO:0006367	transcription initiation from RNA polymerase II promoter	5	38	0.131579	0.997944	0.00545289	1	0.992	SSL1_YEAST	TAF5_YEAST	T2FB_YEAST	TAF10_YEAST	RAD25_YEAST
biological_process	GO:0007346	regulation of mitotic cell cycle	4	7	0.571429	0.997481	0.00567976	1	0.992	BMH1_YEAST	SIS2_YEAST	CKS1_YEAST	BMH2_YEAST
biological_process	GO:0043457	regulation of cellular respiration	3	7	0.428571	0.999463	0.00529229	1	0.992	HAP2_YEAST	HAP5_YEAST	HAP1_YEAST
biological_process	GO:0051168	nuclear export	2	2	1	0.997673	0.00540928	1	0.992	MEX67_YEAST	XPO1_YEAST
biological_process	GO:0031397	negative regulation of protein ubiquitination	0	2	0	0.999463	0.00529229	1	0.992
biological_process	GO:0001558	regulation of cell growth	3	11	0.272727	0.99855	0.0057232	1	0.993	SLM2_YEAST	SLM1_YEAST	KOG1_YEAST
biological_process	GO:0000435	positive regulation of transcription from RNA polymerase II promoter by galactose	3	6	0.5	0.999681	0.00583861	1	0.994	SSN2_YEAST	SSN3_YEAST	GAL4_YEAST
biological_process	GO:0071931	positive regulation of transcription involved in G1/S transition of mitotic cell cycle	3	6	0.5	0.999681	0.00583861	1	0.994	MBP1_YEAST	SWI4_YEAST	SWI6_YEAST
biological_process	GO:0010737	protein kinase A signaling	3	6	0.5	0.999681	0.00583861	1	0.994	KAPB_YEAST	GPA2_YEAST	YAK1_YEAST
biological_process	GO:0000431	regulation of transcription from RNA polymerase II promoter by galactose	1	2	0.5	0.999681	0.00583861	1	0.994	GAL4_YEAST
biological_process	GO:0006378	mRNA polyadenylation	6	24	0.25	0.998745	0.0064576	1	0.995	PFS2_YEAST	HRP1_YEAST	PTI1_YEAST	PCF11_YEAST	RNA15_YEAST	NAB2_YEAST
biological_process	GO:0045010	actin nucleation	1	4	0.25	0.998745	0.0064576	1	0.995	BNR1_YEAST
biological_process	GO:0030968	endoplasmic reticulum unfolded protein response	3	17	0.176471	0.998045	0.00812858	1	0.997	OPI1_YEAST	EDE1_YEAST	SLT2_YEAST
biological_process	GO:0060628	regulation of ER to Golgi vesicle-mediated transport	2	4	0.5	0.999133	0.00750482	1	0.997	TIP20_YEAST	HRR25_YEAST
biological_process	GO:0030100	regulation of endocytosis	1	4	0.25	0.997948	0.0095837	1	0.997	RV167_YEAST
biological_process	GO:0010628	positive regulation of gene expression	1	2	0.5	0.99729	0.00792358	1	0.997	WHI2_YEAST
biological_process	GO:0098789	pre-mRNA cleavage required for polyadenylation	5	21	0.238095	0.997488	0.0131852	1	0.999	PFS2_YEAST	HRP1_YEAST	PTI1_YEAST	PCF11_YEAST	RNA15_YEAST
biological_process	GO:0060237	regulation of fungal-type cell wall organization	5	21	0.238095	0.997488	0.0131852	1	0.999	STT4_YEAST	SSD1_YEAST	SLT2_YEAST	AZF1_YEAST	CBK1_YEAST
biological_process	GO:0051276	chromosome organization	2	11	0.181818	0.993567	0.00988283	1	0.999	SWC4_YEAST	YTM1_YEAST
biological_process	GO:1903450	regulation of G1 to G0 transition	2	3	0.666667	0.999296	0.00968977	1	0.999	RLM1_YEAST	SSD1_YEAST
biological_process	GO:0034314	Arp2/3 complex-mediated actin nucleation	0	7	0	0.998095	0.0106441	1	0.999
biological_process	GO:2000369	regulation of clathrin-dependent endocytosis	0	1	0	0.999296	0.00968977	1	0.999
biological_process	GO:0006368	transcription elongation from RNA polymerase II promoter	9	76	0.118421	0.979898	0.0397812	1	1	RSC2_YEAST	RSC4_YEAST	RT102_YEAST	CCR4_YEAST	NOT1_YEAST	POP2_YEAST	T2FB_YEAST	SKN7_YEAST	THO1_YEAST
biological_process	GO:0032968	positive regulation of transcription elongation from RNA polymerase II promoter	9	68	0.132353	0.978989	0.0502904	1	1	MED2_YEAST	CCR4_YEAST	FKH2_YEAST	MED15_YEAST	PFD5_YEAST	NOT1_YEAST	POP2_YEAST	MED3_YEAST	NOT4_YEAST
biological_process	GO:0007059	chromosome segregation	8	52	0.153846	0.853723	0.21197	1	1	CBF3A_YEAST	RSC2_YEAST	RT102_YEAST	SPC25_YEAST	KIN3_YEAST	DSN1_YEAST	DBF4_YEAST	NU170_YEAST
biological_process	GO:0051321	meiotic cell cycle	8	65	0.123077	0.663081	0.420754	1	1	MDS3_YEAST	IME4_YEAST	PACC_YEAST	SET3_YEAST	SSN3_YEAST	MUM2_YEAST	IDS2_YEAST	IME1_YEAST
biological_process	GO:0016573	histone acetylation	8	54	0.148148	0.994365	0.0157021	1	1	TAF5_YEAST	SPT20_YEAST	EPL1_YEAST	SGF73_YEAST	SWC4_YEAST	TAF12_YEAST	TAF10_YEAST	EAF1_YEAST
biological_process	GO:0006887	exocytosis	8	42	0.190476	0.990743	0.0269357	1	1	SYT1_YEAST	SEC3_YEAST	KIN1_YEAST	KIN2_YEAST	SLA2_YEAST	OSH3_YEAST	STX8_YEAST	SEC9_YEAST
biological_process	GO:0006281	DNA repair	7	105	0.0666667	0.676674	0.407974	1	1	SMC6_YEAST	HRR25_YEAST	MLP1_YEAST	EPL1_YEAST	SWC4_YEAST	RAD53_YEAST	EAF1_YEAST
biological_process	GO:0030435	sporulation resulting in formation of a cellular spore	7	51	0.137255	0.885122	0.180138	1	1	RSC2_YEAST	MDS3_YEAST	IME4_YEAST	PRTB_YEAST	SEF1_YEAST	MUM2_YEAST	IME1_YEAST
biological_process	GO:0030433	ubiquitin-dependent ERAD pathway	7	45	0.155556	0.98278	0.0481114	1	1	JEM1_YEAST	HLJ1_YEAST	LCL2_YEAST	HRD3_YEAST	SCJ1_YEAST	MNL2_YEAST	DOA10_YEAST
biological_process	GO:0016236	macroautophagy	6	72	0.0833333	0.987899	0.0243252	1	1	SEC24_YEAST	SEC16_YEAST	STT4_YEAST	VAM7_YEAST	ATG13_YEAST	ATG1_YEAST
biological_process	GO:0006888	endoplasmic reticulum to Golgi vesicle-mediated transport	6	86	0.0697674	0.976687	0.0489465	1	1	GRH1_YEAST	COPB2_YEAST	GTS1_YEAST	SEC7_YEAST	TRS33_YEAST	RAEP_YEAST
biological_process	GO:0006623	protein targeting to vacuole	6	60	0.1	0.956978	0.0826722	1	1	AP3M_YEAST	HSE1_YEAST	VPS64_YEAST	STP22_YEAST	VPS53_YEAST	VPS27_YEAST
biological_process	GO:0030437	ascospore formation	6	52	0.115385	0.613535	0.532727	1	1	BMH1_YEAST	AMA1_YEAST	GPA2_YEAST	SET1_YEAST	PACC_YEAST	BMH2_YEAST
biological_process	GO:0031509	subtelomeric heterochromatin assembly	5	63	0.0793651	0.720949	0.455967	1	1	DLS1_YEAST	IFH1_YEAST	MPS3_YEAST	MCM10_YEAST	SET1_YEAST
biological_process	GO:0009060	aerobic respiration	5	47	0.106383	0.315101	0.8211	1	1	MBR1_YEAST	MIX17_YEAST	PUF3_YEAST	RSF1_YEAST	QCR6_YEAST
biological_process	GO:0071555	cell wall organization	5	53	0.0943396	0.229362	0.844178	1	1	SLA1_YEAST	PAN1_YEAST	ZDS1_YEAST	RCR1_YEAST	ECM30_YEAST
biological_process	GO:0006896	Golgi to vacuole transport	5	30	0.166667	0.983904	0.055171	1	1	AP3M_YEAST	STX8_YEAST	VPS53_YEAST	TLG2_YEAST	VAM3_YEAST
biological_process	GO:0006906	vesicle fusion	5	23	0.217391	0.98655	0.0393832	1	1	STX8_YEAST	SEC9_YEAST	TLG2_YEAST	VAM7_YEAST	VAM3_YEAST
biological_process	GO:0016567	protein ubiquitination	5	80	0.0625	0.606603	0.524814	1	1	CDC27_YEAST	HRD3_YEAST	DEF1_YEAST	NOT4_YEAST	APC1_YEAST
biological_process	GO:0006511	ubiquitin-dependent protein catabolic process	5	96	0.0520833	0.946465	0.0843915	1	1	GRR1_YEAST	DEF1_YEAST	RPN10_YEAST	UBP4_YEAST	UBP7_YEAST
biological_process	GO:0016197	endosomal transport	5	10	0.5	0.927771	0.128236	1	1	SLM2_YEAST	SLM1_YEAST	EDE1_YEAST	SLA1_YEAST	PAN1_YEAST
biological_process	GO:0031929	TOR signaling	5	18	0.277778	0.98655	0.0393832	1	1	SLM2_YEAST	SLM1_YEAST	KOG1_YEAST	MDS3_YEAST	VPS64_YEAST
biological_process	GO:0006446	regulation of translational initiation	5	13	0.384615	0.981185	0.0621625	1	1	EI2BG_YEAST	EI2BD_YEAST	PAT1_YEAST	PABP_YEAST	IF2P_YEAST
biological_process	GO:0034727	piecemeal microautophagy of the nucleus	5	41	0.121951	0.935944	0.156914	1	1	OSH3_YEAST	VAM7_YEAST	VAM3_YEAST	ATG13_YEAST	ATG1_YEAST
biological_process	GO:0000724	double-strand break repair via homologous recombination	4	33	0.121212	0.636141	0.531513	1	1	SNF5_YEAST	RSC2_YEAST	SMC6_YEAST	RAD52_YEAST
biological_process	GO:0006364	rRNA processing	4	108	0.037037	0.0038871	0.998473	0.446	1	YTM1_YEAST	YC16_YEAST	POP1_YEAST	NAF1_YEAST
biological_process	GO:0006470	protein dephosphorylation	4	43	0.0930233	0.782072	0.367587	1	1	HAL5_YEAST	PSR1_YEAST	PPZ1_YEAST	WHI2_YEAST
biological_process	GO:0000422	autophagy of mitochondrion	4	37	0.108108	0.74171	0.453714	1	1	STT4_YEAST	WHI2_YEAST	ATG13_YEAST	ATG1_YEAST
biological_process	GO:0007121	bipolar cellular bud site selection	4	18	0.222222	0.993394	0.0332255	1	1	PEF1_YEAST	SLA2_YEAST	PAN1_YEAST	RAX1_YEAST
biological_process	GO:0007118	budding cell apical bud growth	4	20	0.2	0.986815	0.0551123	1	1	MOB2_YEAST	TAO3_YEAST	CBK1_YEAST	BOI2_YEAST
biological_process	GO:0007005	mitochondrion organization	4	41	0.097561	0.35845	0.728375	1	1	MIX17_YEAST	SML1_YEAST	NGR1_YEAST	PUF3_YEAST
biological_process	GO:0048278	vesicle docking	4	13	0.307692	0.981185	0.0621625	1	1	STX8_YEAST	TLG2_YEAST	VAM7_YEAST	VAM3_YEAST
biological_process	GO:0009651	response to salt stress	4	15	0.266667	0.962934	0.116762	1	1	PSR1_YEAST	SIS2_YEAST	WHI2_YEAST	HAL9_YEAST
biological_process	GO:0046777	protein autophosphorylation	4	25	0.16	0.986339	0.0486585	1	1	KIN1_YEAST	KIN2_YEAST	ATG1_YEAST	AKL1_YEAST
biological_process	GO:0006270	DNA replication initiation	4	32	0.125	0.989518	0.0298607	1	1	DBF4_YEAST	MCM10_YEAST	RAD53_YEAST	BMH2_YEAST
biological_process	GO:0043161	proteasome-mediated ubiquitin-dependent protein catabolic process	4	68	0.0588235	0.91756	0.133642	1	1	PSA4_YEAST	RPN10_YEAST	UBX5_YEAST	GID8_YEAST
biological_process	GO:0043162	ubiquitin-dependent protein catabolic process via the multivesicular body sorting pathway	4	18	0.222222	0.980372	0.0579439	1	1	HSE1_YEAST	UBP4_YEAST	STP22_YEAST	VPS27_YEAST
biological_process	GO:0000070	mitotic sister chromatid segregation	4	26	0.153846	0.377337	0.748559	1	1	SMC1_YEAST	FIN1_YEAST	DSN1_YEAST	CIN8_YEAST
biological_process	GO:1904669	ATP export	4	17	0.235294	0.994943	0.02731	1	1	HSE1_YEAST	UBP4_YEAST	STP22_YEAST	VPS27_YEAST
biological_process	GO:0043328	protein transport to vacuole involved in ubiquitin-dependent protein catabolic process via the multivesicular body sorting pathway	4	28	0.142857	0.957376	0.129119	1	1	LSB1_YEAST	HSE1_YEAST	VPS27_YEAST	GID8_YEAST
biological_process	GO:0000055	ribosomal large subunit export from nucleus	4	32	0.125	0.922428	0.197966	1	1	NUP49_YEAST	MEX67_YEAST	NU116_YEAST	XPO1_YEAST
biological_process	GO:0045727	positive regulation of translation	4	12	0.333333	0.970139	0.0749791	1	1	SLF1_YEAST	PUF3_YEAST	WHI3_YEAST	DHH1_YEAST
biological_process	GO:0000920	septum digestion after cytokinesis	4	18	0.222222	0.989356	0.0471262	1	1	MOB2_YEAST	MYO1_YEAST	CBK1_YEAST	BOI2_YEAST
biological_process	GO:0000077	DNA damage checkpoint signaling	4	19	0.210526	0.875935	0.275267	1	1	BMH1_YEAST	PIN4_YEAST	RAD53_YEAST	BMH2_YEAST
biological_process	GO:0000045	autophagosome assembly	4	25	0.16	0.971649	0.077372	1	1	SEC7_YEAST	YPT11_YEAST	ATG13_YEAST	ATG1_YEAST
biological_process	GO:0016579	protein deubiquitination	4	24	0.166667	0.99426	0.0218328	1	1	OTU2_YEAST	UBP4_YEAST	UBP7_YEAST	UBP6_YEAST
biological_process	GO:0070816	phosphorylation of RNA polymerase II C-terminal domain	3	18	0.166667	0.916893	0.235043	1	1	SSL1_YEAST	SSN3_YEAST	RAD25_YEAST
biological_process	GO:0005975	carbohydrate metabolic process	3	36	0.0833333	0.115549	0.929495	1	1	MIG1_YEAST	MNL2_YEAST	MIG2_YEAST
biological_process	GO:0032880	regulation of protein localization	3	28	0.107143	0.992193	0.019009	1	1	EDE1_YEAST	HRR25_YEAST	ZDS1_YEAST
biological_process	GO:0006457	protein folding	3	80	0.0375	0.426389	0.715257	1	1	PFD5_YEAST	STI1_YEAST	APJ1_YEAST
biological_process	GO:0032258	cytoplasm to vacuole transport by the Cvt pathway	3	48	0.0625	0.912223	0.185792	1	1	TLG2_YEAST	VAM7_YEAST	ATG1_YEAST
biological_process	GO:0045324	late endosome to vacuole transport	3	19	0.157895	0.82204	0.316545	1	1	HSE1_YEAST	STP22_YEAST	VPS27_YEAST
biological_process	GO:0042144	vacuole fusion, non-autophagic	3	34	0.0882353	0.627114	0.605602	1	1	YD089_YEAST	VAM7_YEAST	VAM3_YEAST
biological_process	GO:0007120	axial cellular bud site selection	3	15	0.2	0.982499	0.0830285	1	1	PEF1_YEAST	PAN1_YEAST	RAX1_YEAST
biological_process	GO:0016239	positive regulation of macroautophagy	3	15	0.2	0.916893	0.235043	1	1	EPL1_YEAST	TRS33_YEAST	CLG1_YEAST
biological_process	GO:0006289	nucleotide-excision repair	3	33	0.0909091	0.831505	0.303946	1	1	SSL1_YEAST	SNF6_YEAST	RAD25_YEAST
biological_process	GO:0031126	sno(s)RNA 3'-end processing	3	10	0.3	0.905156	0.22813	1	1	NRD1_YEAST	PTI1_YEAST	NAB3_YEAST
biological_process	GO:0001402	signal transduction involved in filamentous growth	3	13	0.230769	0.98975	0.0578474	1	1	BMH1_YEAST	MSB2_YEAST	BMH2_YEAST
biological_process	GO:0031505	fungal-type cell wall organization	3	135	0.0222222	0.095052	0.948584	1	1	SLA2_YEAST	MSB2_YEAST	CSR2_YEAST
biological_process	GO:0055085	transmembrane transport	3	96	0.03125	0.000973259	0.999599	0.104	1	GNP1_YEAST	ATC2_YEAST	MEX67_YEAST
biological_process	GO:0060261	positive regulation of transcription initiation from RNA polymerase II promoter	3	28	0.107143	0.8861	0.259351	1	1	MED2_YEAST	MED15_YEAST	MED3_YEAST
biological_process	GO:0034501	protein localization to kinetochore	3	11	0.272727	0.994708	0.0370237	1	1	FIN1_YEAST	XPO1_YEAST	NUP53_YEAST
biological_process	GO:0071028	nuclear mRNA surveillance	3	16	0.1875	0.983904	0.055171	1	1	NRD1_YEAST	PIN4_YEAST	NAB3_YEAST
biological_process	GO:0006397	mRNA processing	3	45	0.0666667	0.745245	0.345691	1	1	PAT1_YEAST	PABP_YEAST	DHH1_YEAST
biological_process	GO:0006974	cellular response to DNA damage stimulus	3	59	0.0508475	0.877649	0.16865	1	1	DEF1_YEAST	SML1_YEAST	ALK1_YEAST
biological_process	GO:0000290	deadenylation-dependent decapping of nuclear-transcribed mRNA	3	20	0.15	0.952874	0.161461	1	1	PAT1_YEAST	DHH1_YEAST	EAP1_YEAST
biological_process	GO:0006369	termination of RNA polymerase II transcription	3	17	0.176471	0.993542	0.0273483	1	1	REB1_YEAST	NRD1_YEAST	PCF11_YEAST
biological_process	GO:0007265	Ras protein signal transduction	3	12	0.25	0.925021	0.16467	1	1	BMH1_YEAST	KAPB_YEAST	BMH2_YEAST
biological_process	GO:0000723	telomere maintenance	3	43	0.0697674	0.318736	0.830382	1	1	CDC13_YEAST	DEF1_YEAST	SET1_YEAST
biological_process	GO:0042273	ribosomal large subunit biogenesis	3	53	0.0566038	0.143195	0.931449	1	1	HRR25_YEAST	JIP5_YEAST	YTM1_YEAST
biological_process	GO:0006612	protein targeting to membrane	3	23	0.130435	0.849735	0.279051	1	1	STP22_YEAST	RAEP_YEAST	NACA_YEAST
biological_process	GO:0051017	actin filament bundle assembly	3	15	0.2	0.870881	0.31314	1	1	SLM2_YEAST	SLM1_YEAST	BNR1_YEAST
biological_process	GO:0030950	establishment or maintenance of actin cytoskeleton polarity	3	15	0.2	0.982499	0.0830285	1	1	SLM2_YEAST	SLM1_YEAST	CBK1_YEAST
biological_process	GO:0010255	glucose mediated signaling pathway	3	8	0.375	0.992495	0.0468633	1	1	GPA2_YEAST	KC11_YEAST	KC12_YEAST
biological_process	GO:0043486	histone exchange	3	18	0.166667	0.980572	0.0731176	1	1	SWC4_YEAST	SWC5_YEAST	TUP1_YEAST
biological_process	GO:0006303	double-strand break repair via nonhomologous end joining	3	28	0.107143	0.787103	0.430386	1	1	RSC2_YEAST	SIN3_YEAST	NEJ1_YEAST
biological_process	GO:0006337	nucleosome disassembly	3	19	0.157895	0.96017	0.14431	1	1	RSC2_YEAST	RSC4_YEAST	RT102_YEAST
biological_process	GO:0016584	nucleosome positioning	3	13	0.230769	0.98975	0.0578474	1	1	CYC8_YEAST	TUP1_YEAST	NU170_YEAST
biological_process	GO:0048309	endoplasmic reticulum inheritance	3	13	0.230769	0.98975	0.0578474	1	1	RTN1_YEAST	SEC3_YEAST	YPT11_YEAST
biological_process	GO:0016575	histone deacetylation	3	21	0.142857	0.870881	0.31314	1	1	HDA1_YEAST	SIN3_YEAST	SET3_YEAST
biological_process	GO:0008298	intracellular mRNA localization	3	19	0.157895	0.944888	0.179185	1	1	COPB2_YEAST	PUF3_YEAST	SSD1_YEAST
biological_process	GO:0060963	positive regulation of ribosomal protein gene transcription by RNA polymerase II	3	9	0.333333	0.997738	0.0209277	1	1	SFP1_YEAST	IFH1_YEAST	MSN1_YEAST
biological_process	GO:0006891	intra-Golgi vesicle-mediated transport	3	31	0.0967742	0.816628	0.391812	1	1	COPB2_YEAST	GTS1_YEAST	SEC7_YEAST
biological_process	GO:1903475	mitotic actomyosin contractile ring assembly	3	11	0.272727	0.952874	0.161461	1	1	RV167_YEAST	BNR1_YEAST	MYO1_YEAST
biological_process	GO:0018107	peptidyl-threonine phosphorylation	3	17	0.176471	0.966775	0.127814	1	1	HOG1_YEAST	YAK1_YEAST	AKL1_YEAST
biological_process	GO:0000973	posttranscriptional tethering of RNA polymerase II gene DNA at nuclear periphery	3	18	0.166667	0.966775	0.127814	1	1	NU116_YEAST	NU100_YEAST	SAC3_YEAST
biological_process	GO:0007163	establishment or maintenance of cell polarity	3	10	0.3	0.95423	0.0871452	1	1	ATC5_YEAST	MOB2_YEAST	CBK1_YEAST
biological_process	GO:0001100	negative regulation of exit from mitosis	3	10	0.3	0.983894	0.0637803	1	1	HOG1_YEAST	DBF4_YEAST	NET1_YEAST
biological_process	GO:0006626	protein targeting to mitochondrion	3	10	0.3	0.321228	0.844794	1	1	STI1_YEAST	TOM71_YEAST	TOM70_YEAST
biological_process	GO:0031145	anaphase-promoting complex-dependent catabolic process	3	18	0.166667	0.966775	0.127814	1	1	AMA1_YEAST	CDC27_YEAST	APC1_YEAST
biological_process	GO:0000321	re-entry into mitotic cell cycle after pheromone arrest	3	9	0.333333	0.997738	0.0209277	1	1	POG1_YEAST	VPS64_YEAST	FAR7_YEAST
biological_process	GO:0000753	cell morphogenesis involved in conjugation with cellular fusion	3	8	0.375	0.982499	0.0830285	1	1	SPO14_YEAST	MDY2_YEAST	BEM1_YEAST
biological_process	GO:0000433	carbon catabolite repression of transcription from RNA polymerase II promoter by glucose	3	11	0.272727	0.994708	0.0370237	1	1	MIG1_YEAST	TUP1_YEAST	MIG2_YEAST
biological_process	GO:0016237	lysosomal microautophagy	3	13	0.230769	0.995057	0.0148927	1	1	HSE1_YEAST	YD089_YEAST	VPS27_YEAST
biological_process	GO:0034398	telomere tethering at nuclear periphery	3	13	0.230769	0.98643	0.0699231	1	1	MLP1_YEAST	MPS3_YEAST	NU170_YEAST
biological_process	GO:2001020	regulation of response to DNA damage stimulus	3	7	0.428571	0.974839	0.077572	1	1	CYC8_YEAST	DEF1_YEAST	TUP1_YEAST
biological_process	GO:0000902	cell morphogenesis	3	10	0.3	0.947097	0.125835	1	1	KC11_YEAST	KC12_YEAST	TAO3_YEAST
biological_process	GO:0009749	response to glucose	3	4	0.75	0.997242	0.0175015	1	1	KC11_YEAST	KC12_YEAST	SKS1_YEAST
biological_process	GO:0031990	mRNA export from nucleus in response to heat stress	3	10	0.3	0.994708	0.0370237	1	1	NU188_YEAST	NU100_YEAST	NUP59_YEAST
biological_process	GO:0006797	polyphosphate metabolic process	3	11	0.272727	0.98643	0.0699231	1	1	PPN1_YEAST	PHO91_YEAST	YD089_YEAST
biological_process	GO:0030174	regulation of DNA-dependent DNA replication initiation	2	20	0.1	0.962934	0.116762	1	1	SLD7_YEAST	SIN3_YEAST
biological_process	GO:0000022	mitotic spindle elongation	2	12	0.166667	0.764957	0.50995	1	1	CBF3A_YEAST	CIN8_YEAST
biological_process	GO:0042274	ribosomal small subunit biogenesis	2	31	0.0645161	0.0257666	0.991381	0.986	1	HRR25_YEAST	SAC3_YEAST
biological_process	GO:0006006	glucose metabolic process	2	17	0.117647	0.91128	0.17796	1	1	GRR1_YEAST	RGT1_YEAST
biological_process	GO:0006874	cellular calcium ion homeostasis	2	16	0.125	0.97683	0.0831071	1	1	ATC2_YEAST	CSG2_YEAST
biological_process	GO:1990961	xenobiotic detoxification by transmembrane export across the plasma membrane	2	19	0.105263	0.85569	0.389211	1	1	TPO2_YEAST	TPO3_YEAST
biological_process	GO:0030010	establishment of cell polarity	2	27	0.0740741	0.750173	0.406138	1	1	MSB2_YEAST	ZDS1_YEAST
biological_process	GO:0000011	vacuole inheritance	2	19	0.105263	0.85569	0.389211	1	1	VAC7_YEAST	CLA4_YEAST
biological_process	GO:0042147	retrograde transport, endosome to Golgi	2	34	0.0588235	0.394398	0.825241	1	1	VPS53_YEAST	BOI2_YEAST
biological_process	GO:0000079	regulation of cyclin-dependent protein serine/threonine kinase activity	2	26	0.0769231	0.706577	0.574534	1	1	PCL8_YEAST	CLG1_YEAST
biological_process	GO:0007064	mitotic sister chromatid cohesion	2	30	0.0666667	0.4432	0.793754	1	1	SMC1_YEAST	MPS3_YEAST
biological_process	GO:0030466	silent mating-type cassette heterochromatin assembly	2	46	0.0434783	0.600633	0.602296	1	1	MCM10_YEAST	SET1_YEAST
biological_process	GO:0000462	maturation of SSU-rRNA from tricistronic rRNA transcript (SSU-rRNA, 5.8S rRNA, LSU-rRNA)	2	71	0.028169	0.0195172	0.995682	0.959	1	RS20_YEAST	IF2P_YEAST
biological_process	GO:0007062	sister chromatid cohesion	2	14	0.142857	0.358137	0.820828	1	1	SMC1_YEAST	RSC2_YEAST
biological_process	GO:0000398	mRNA splicing, via spliceosome	2	86	0.0232558	0.0853874	0.965797	1	1	CWC21_YEAST	NAM8_YEAST
biological_process	GO:0080009	mRNA methylation	2	4	0.5	0.998701	0.0267877	1	1	IME4_YEAST	MUM2_YEAST
biological_process	GO:0006409	tRNA export from nucleus	2	15	0.133333	0.887951	0.337252	1	1	NUP49_YEAST	NU116_YEAST
biological_process	GO:0051085	chaperone cofactor-dependent protein refolding	2	18	0.111111	0.872186	0.363432	1	1	HLJ1_YEAST	JJJ2_YEAST
biological_process	GO:0006890	retrograde vesicle-mediated transport, Golgi to endoplasmic reticulum	2	33	0.0606061	0.569614	0.700365	1	1	TIP20_YEAST	COPB2_YEAST
biological_process	GO:0032543	mitochondrial translation	2	102	0.0196078	0.0414981	0.98517	1	1	RM28_YEAST	RSM28_YEAST
biological_process	GO:0006915	apoptotic process	2	24	0.0833333	0.8861	0.259351	1	1	MCA1_YEAST	WWM1_YEAST
biological_process	GO:0071902	positive regulation of protein serine/threonine kinase activity	2	14	0.142857	0.916971	0.28405	1	1	KOG1_YEAST	DBF4_YEAST
biological_process	GO:0045943	positive regulation of transcription by RNA polymerase I	2	22	0.0909091	0.667112	0.614031	1	1	SNF6_YEAST	TAP42_YEAST
biological_process	GO:0034599	cellular response to oxidative stress	2	88	0.0227273	0.105742	0.956004	1	1	HOG1_YEAST	ASK10_YEAST
biological_process	GO:0002098	tRNA wobble uridine modification	2	28	0.0714286	0.667112	0.614031	1	1	HRR25_YEAST	TRM9_YEAST
biological_process	GO:0070131	positive regulation of mitochondrial translation	2	13	0.153846	0.930077	0.257247	1	1	PET54_YEAST	PT122_YEAST
biological_process	GO:0043619	regulation of transcription from RNA polymerase II promoter in response to oxidative stress	2	9	0.222222	0.97163	0.152163	1	1	SKN7_YEAST	MSN2_YEAST
biological_process	GO:0042594	response to starvation	2	6	0.333333	0.951193	0.097552	1	1	MSN2_YEAST	ATG1_YEAST
biological_process	GO:0000727	double-strand break repair via break-induced replication	2	25	0.08	0.745687	0.532179	1	1	MCM10_YEAST	RAD52_YEAST
biological_process	GO:0031087	deadenylation-independent decapping of nuclear-transcribed mRNA	2	7	0.285714	0.99031	0.0814835	1	1	NOT4_YEAST	EDC3_YEAST
biological_process	GO:0000749	response to pheromone triggering conjugation with cellular fusion	2	10	0.2	0.91128	0.17796	1	1	ATC5_YEAST	NOT1_YEAST
biological_process	GO:0007231	osmosensory signaling pathway	2	5	0.4	0.97269	0.112049	1	1	PBS2_YEAST	HOG1_YEAST
biological_process	GO:0006541	glutamine metabolic process	2	21	0.0952381	0.745687	0.532179	1	1	ADCS_YEAST	TRPE_YEAST
biological_process	GO:0001174	transcriptional start site selection at RNA polymerase II promoter	2	7	0.285714	0.97163	0.152163	1	1	REB1_YEAST	T2FB_YEAST
biological_process	GO:0007130	synaptonemal complex assembly	2	20	0.1	0.820815	0.439288	1	1	AMA1_YEAST	SET1_YEAST
biological_process	GO:0006260	DNA replication	2	28	0.0714286	0.937556	0.106791	1	1	SLD7_YEAST	CCR4_YEAST
biological_process	GO:0043547	positive regulation of GTPase activity	2	26	0.0769231	0.70866	0.522336	1	1	EI2BG_YEAST	EI2BD_YEAST
biological_process	GO:0000209	protein polyubiquitination	2	36	0.0555556	0.794506	0.389217	1	1	GRR1_YEAST	NOT4_YEAST
biological_process	GO:0070086	ubiquitin-dependent endocytosis	2	12	0.166667	0.953137	0.203927	1	1	LDB19_YEAST	CSR2_YEAST
biological_process	GO:0000184	nuclear-transcribed mRNA catabolic process, nonsense-mediated decay	2	21	0.0952381	0.53195	0.730139	1	1	HRP1_YEAST	PUB1_YEAST
biological_process	GO:0033617	mitochondrial cytochrome c oxidase assembly	2	29	0.0689655	0.667112	0.614031	1	1	COX20_YEAST	PT122_YEAST
biological_process	GO:0006302	double-strand break repair	2	38	0.0526316	0.578933	0.552606	1	1	SMC1_YEAST	SNF2_YEAST
biological_process	GO:0070941	eisosome assembly	2	11	0.181818	0.962976	0.177749	1	1	SLM2_YEAST	SLM1_YEAST
biological_process	GO:0072659	protein localization to plasma membrane	2	12	0.166667	0.726206	0.553711	1	1	SLM2_YEAST	SLM1_YEAST
biological_process	GO:0038203	TORC2 signaling	2	6	0.333333	0.994161	0.060971	1	1	SLM2_YEAST	SLM1_YEAST
biological_process	GO:0061709	reticulophagy	2	15	0.133333	0.916971	0.28405	1	1	STP22_YEAST	ATG1_YEAST
biological_process	GO:0034975	protein folding in endoplasmic reticulum	2	14	0.142857	0.930077	0.257247	1	1	JEM1_YEAST	SCJ1_YEAST
biological_process	GO:0000056	ribosomal small subunit export from nucleus	2	14	0.142857	0.930077	0.257247	1	1	MEX67_YEAST	XPO1_YEAST
biological_process	GO:0030242	autophagy of peroxisome	2	23	0.0869565	0.858008	0.332888	1	1	HRR25_YEAST	SLT2_YEAST
biological_process	GO:2000218	negative regulation of invasive growth in response to glucose limitation	2	3	0.666667	0.999657	0.0140434	1	1	SIP4_YEAST	DIG1_YEAST
biological_process	GO:0000296	spermine transport	2	6	0.333333	0.994161	0.060971	1	1	TPO2_YEAST	TPO3_YEAST
biological_process	GO:0042790	nucleolar large rRNA transcription by RNA polymerase I	2	34	0.0588235	0.569614	0.700365	1	1	IFH1_YEAST	RRN7_YEAST
biological_process	GO:0000463	maturation of LSU-rRNA from tricistronic rRNA transcript (SSU-rRNA, 5.8S rRNA, LSU-rRNA)	2	38	0.0526316	0.321312	0.868233	1	1	YTM1_YEAST	URB1_YEAST
biological_process	GO:0031507	heterochromatin assembly	2	18	0.111111	0.740096	0.380605	1	1	ZDS1_YEAST	NU170_YEAST
biological_process	GO:0007030	Golgi organization	2	21	0.0952381	0.895845	0.243627	1	1	SEC16_YEAST	GRH1_YEAST
biological_process	GO:0032581	ER-dependent peroxisome organization	2	9	0.222222	0.979072	0.127404	1	1	RTN1_YEAST	PEX3_YEAST
biological_process	GO:0051292	nuclear pore complex assembly	2	6	0.333333	0.994161	0.060971	1	1	RTN1_YEAST	NU170_YEAST
biological_process	GO:0010498	proteasomal protein catabolic process	2	16	0.125	0.930548	0.113593	1	1	PSA4_YEAST	NOT4_YEAST
biological_process	GO:0061186	negative regulation of silent mating-type cassette heterochromatin assembly	2	11	0.181818	0.962976	0.177749	1	1	FKH2_YEAST	SIN3_YEAST
biological_process	GO:0090110	COPII-coated vesicle cargo loading	2	6	0.333333	0.994161	0.060971	1	1	SEC24_YEAST	SFB2_YEAST
biological_process	GO:0006261	DNA-dependent DNA replication	2	26	0.0769231	0.914668	0.144588	1	1	SNF2_YEAST	SWI1_YEAST
biological_process	GO:2001159	regulation of protein localization by the Cvt pathway	2	5	0.4	0.996921	0.0425936	1	1	SFL1_YEAST	HRR25_YEAST
biological_process	GO:0006283	transcription-coupled nucleotide-excision repair	2	11	0.181818	0.872186	0.363432	1	1	DEF1_YEAST	SAC3_YEAST
biological_process	GO:0008033	tRNA processing	2	31	0.0645161	0.170785	0.910281	1	1	STP1_YEAST	POP1_YEAST
biological_process	GO:0071034	CUT catabolic process	2	4	0.5	0.930077	0.257247	1	1	NRD1_YEAST	NAB3_YEAST
biological_process	GO:0070481	nuclear-transcribed mRNA catabolic process, non-stop decay	2	23	0.0869565	0.783949	0.487041	1	1	SSN3_YEAST	YP199_YEAST
biological_process	GO:0006620	posttranslational protein targeting to endoplasmic reticulum membrane	2	9	0.222222	0.802593	0.463477	1	1	MDY2_YEAST	NACA_YEAST
biological_process	GO:0006979	response to oxidative stress	2	11	0.181818	0.55153	0.586118	1	1	SNF2_YEAST	SSN3_YEAST
biological_process	GO:0000183	rDNA heterochromatin assembly	2	23	0.0869565	0.816628	0.391812	1	1	NET1_YEAST	SET1_YEAST
biological_process	GO:0042780	tRNA 3'-end processing	2	4	0.5	0.99031	0.0814835	1	1	NRD1_YEAST	NAB3_YEAST
biological_process	GO:0009267	cellular response to starvation	2	17	0.117647	0.784757	0.352132	1	1	KOG1_YEAST	PRTB_YEAST
biological_process	GO:0061406	positive regulation of transcription from RNA polymerase II promoter in response to glucose starvation	2	4	0.5	0.998701	0.0267877	1	1	MSN2_YEAST	YAK1_YEAST
biological_process	GO:0006279	premeiotic DNA replication	2	8	0.25	0.985294	0.103743	1	1	DBF4_YEAST	MUM2_YEAST
biological_process	GO:0034063	stress granule assembly	2	14	0.142857	0.930077	0.257247	1	1	PUB1_YEAST	DHH1_YEAST
biological_process	GO:0071930	negative regulation of transcription involved in G1/S transition of mitotic cell cycle	2	8	0.25	0.985294	0.103743	1	1	FKH2_YEAST	WHI5_YEAST
biological_process	GO:0051455	monopolar spindle attachment to meiosis I kinetochore	2	6	0.333333	0.99031	0.0814835	1	1	HRR25_YEAST	DSN1_YEAST
biological_process	GO:0046854	phosphatidylinositol phosphate biosynthetic process	2	14	0.142857	0.916971	0.28405	1	1	FAB1_YEAST	STT4_YEAST
biological_process	GO:0000466	maturation of 5.8S rRNA from tricistronic rRNA transcript (SSU-rRNA, 5.8S rRNA, LSU-rRNA)	2	19	0.105263	0.109102	0.959641	1	1	YTM1_YEAST	URB1_YEAST
biological_process	GO:0034221	fungal-type cell wall chitin biosynthetic process	2	16	0.125	0.902905	0.310758	1	1	BMH1_YEAST	BMH2_YEAST
biological_process	GO:0043066	negative regulation of apoptotic process	2	5	0.4	0.994161	0.060971	1	1	BMH1_YEAST	BMH2_YEAST
biological_process	GO:1904667	negative regulation of ubiquitin protein ligase activity	2	5	0.4	0.996921	0.0425936	1	1	BMH1_YEAST	BMH2_YEAST
biological_process	GO:0070873	regulation of glycogen metabolic process	2	3	0.666667	0.97269	0.112049	1	1	BMH1_YEAST	BMH2_YEAST
biological_process	GO:0051016	barbed-end actin filament capping	2	8	0.25	0.996437	0.0283697	1	1	BNR1_YEAST	AIM3_YEAST
biological_process	GO:0090156	cellular sphingolipid homeostasis	2	7	0.285714	0.99031	0.0814835	1	1	GNP1_YEAST	VPS53_YEAST
biological_process	GO:0010607	negative regulation of cytoplasmic mRNA processing body assembly	2	4	0.5	0.998701	0.0267877	1	1	KAPB_YEAST	NOT1_YEAST
biological_process	GO:0015937	coenzyme A biosynthetic process	2	7	0.285714	0.99031	0.0814835	1	1	CAB3_YEAST	SIS2_YEAST
biological_process	GO:0009272	fungal-type cell wall biogenesis	2	17	0.117647	0.387625	0.767276	1	1	PACC_YEAST	SLT2_YEAST
biological_process	GO:0000742	karyogamy involved in conjugation with cellular fusion	2	15	0.133333	0.916971	0.28405	1	1	JEM1_YEAST	OSH3_YEAST
biological_process	GO:2000370	positive regulation of clathrin-dependent endocytosis	2	4	0.5	0.998701	0.0267877	1	1	HRR25_YEAST	SCD5_YEAST
biological_process	GO:0006012	galactose metabolic process	2	6	0.333333	0.942153	0.230486	1	1	RBS1_YEAST	GAL4_YEAST
biological_process	GO:0034497	protein localization to phagophore assembly site	2	16	0.125	0.902905	0.310758	1	1	TRS33_YEAST	ATG13_YEAST
biological_process	GO:0000730	DNA recombinase assembly	2	9	0.222222	0.962976	0.177749	1	1	PSY3_YEAST	RAD52_YEAST
biological_process	GO:0072423	response to DNA damage checkpoint signaling	2	3	0.666667	0.999657	0.0140434	1	1	HRP1_YEAST	RNA15_YEAST
biological_process	GO:0061395	positive regulation of transcription from RNA polymerase II promoter in response to arsenic-containing substance	2	4	0.5	0.998701	0.0267877	1	1	RPN4_YEAST	MSN2_YEAST
biological_process	GO:0046822	regulation of nucleocytoplasmic transport	2	6	0.333333	0.986815	0.0551123	1	1	GSP1_YEAST	SGF73_YEAST
biological_process	GO:0071985	multivesicular body sorting pathway	2	4	0.5	0.757302	0.41361	1	1	HSE1_YEAST	VPS27_YEAST
biological_process	GO:1903319	positive regulation of protein maturation	2	2	1	0.999657	0.0140434	1	1	HSE1_YEAST	VPS27_YEAST
biological_process	GO:0006611	protein export from nucleus	2	12	0.166667	0.916971	0.28405	1	1	SAC3_YEAST	XPO1_YEAST
biological_process	GO:1905117	regulation of ribonucleoside-diphosphate reductase activity	2	3	0.666667	0.996921	0.0425936	1	1	SML1_YEAST	DIF1_YEAST
biological_process	GO:0007091	metaphase/anaphase transition of mitotic cell cycle	2	6	0.333333	0.627114	0.605602	1	1	CDC27_YEAST	APC1_YEAST
biological_process	GO:1903468	positive regulation of DNA replication initiation	2	3	0.666667	0.999657	0.0140434	1	1	FKH2_YEAST	DBF4_YEAST
biological_process	GO:0090282	positive regulation of transcription involved in G2/M transition of mitotic cell cycle	2	3	0.666667	0.999657	0.0140434	1	1	FKH2_YEAST	NDD1_YEAST
biological_process	GO:0044805	late nucleophagy	2	17	0.117647	0.887951	0.337252	1	1	ATG13_YEAST	ATG1_YEAST
biological_process	GO:0001198	negative regulation of mating-type specific transcription from RNA polymerase II promoter	2	5	0.4	0.996921	0.0425936	1	1	TUP1_YEAST	MCM1_YEAST
biological_process	GO:0030970	retrograde protein transport, ER to cytosol	2	9	0.222222	0.97163	0.152163	1	1	HRD3_YEAST	DOA10_YEAST
biological_process	GO:0045921	positive regulation of exocytosis	2	4	0.5	0.998701	0.0267877	1	1	KIN1_YEAST	KIN2_YEAST
biological_process	GO:0007129	homologous chromosome pairing at meiosis	2	13	0.153846	0.944829	0.155349	1	1	MPS3_YEAST	ZIP1_YEAST
biological_process	GO:1901987	regulation of cell cycle phase transition	2	3	0.666667	0.989256	0.0214456	1	1	GSP1_YEAST	DBF4_YEAST
biological_process	GO:0071041	antisense RNA transcript catabolic process	2	3	0.666667	0.996921	0.0425936	1	1	NRD1_YEAST	NAB3_YEAST
biological_process	GO:0034472	snRNA 3'-end processing	2	2	1	0.838539	0.414517	1	1	NRD1_YEAST	NAB3_YEAST
biological_process	GO:1904262	negative regulation of TORC1 signaling	2	11	0.181818	0.962976	0.177749	1	1	PSR1_YEAST	WHI2_YEAST
biological_process	GO:1900436	positive regulation of filamentous growth of a population of unicellular organisms in response to starvation	2	4	0.5	0.998701	0.0267877	1	1	MIG1_YEAST	MIG2_YEAST
biological_process	GO:0010973	positive regulation of division septum assembly	2	3	0.666667	0.999657	0.0140434	1	1	PACC_YEAST	SLT2_YEAST
biological_process	GO:0051646	mitochondrion localization	2	4	0.5	0.930369	0.183372	1	1	PUF3_YEAST	YPT11_YEAST
biological_process	GO:0001111	promoter clearance from RNA polymerase II promoter	2	4	0.5	0.998701	0.0267877	1	1	T2FB_YEAST	RAD25_YEAST
biological_process	GO:0006479	protein methylation	2	4	0.5	0.247445	0.906939	1	1	SET1_YEAST	SET3_YEAST
biological_process	GO:0140504	microlipophagy	2	3	0.666667	0.999657	0.0140434	1	1	STT4_YEAST	VPS27_YEAST
biological_process	GO:0007036	vacuolar calcium ion homeostasis	2	4	0.5	0.998701	0.0267877	1	1	VAM7_YEAST	VAM3_YEAST
biological_process	GO:0032106	positive regulation of response to extracellular stimulus	2	2	1	0.998051	0.0135698	1	1	WHI3_YEAST	YAK1_YEAST
biological_process	GO:0045002	double-strand break repair via single-strand annealing	2	3	0.666667	0.99031	0.0814835	1	1	RAD52_YEAST	NEJ1_YEAST
biological_process	GO:0042138	meiotic DNA double-strand break formation	1	17	0.0588235	0.726206	0.553711	1	1	SET1_YEAST
biological_process	GO:0000722	telomere maintenance via recombination	1	32	0.03125	0.332079	0.903188	1	1	RAD52_YEAST
biological_process	GO:0051382	kinetochore assembly	1	12	0.0833333	0.916971	0.28405	1	1	CBF3A_YEAST
biological_process	GO:0000921	septin ring assembly	1	16	0.0625	0.689242	0.688268	1	1	CBF3A_YEAST
biological_process	GO:0006465	signal peptide processing	1	10	0.1	0.847837	0.517159	1	1	PCP1_YEAST
biological_process	GO:0019722	calcium-mediated signaling	1	7	0.142857	0.822251	0.5511	1	1	RCN1_YEAST
biological_process	GO:0009408	response to heat	1	20	0.05	0.991171	0.0230411	1	1	WHI2_YEAST
biological_process	GO:0034389	lipid droplet organization	1	8	0.125	0.872596	0.48066	1	1	UME6_YEAST
biological_process	GO:0000280	nuclear division	1	6	0.166667	0.900448	0.145398	1	1	DBF2_YEAST
biological_process	GO:0048026	positive regulation of mRNA splicing, via spliceosome	1	2	0.5	0.99509	0.135407	1	1	NAM8_YEAST
biological_process	GO:0007131	reciprocal meiotic recombination	1	51	0.0196078	0.321228	0.844794	1	1	ZIP1_YEAST
biological_process	GO:1902600	proton transmembrane transport	1	38	0.0263158	0.0453335	0.992599	1	1	QCR6_YEAST
biological_process	GO:2000222	positive regulation of pseudohyphal growth	1	9	0.111111	0.847837	0.517159	1	1	GAL83_YEAST
biological_process	GO:0071786	endoplasmic reticulum tubular network organization	1	7	0.142857	0.918516	0.399201	1	1	RTN1_YEAST
biological_process	GO:0061024	membrane organization	1	7	0.142857	0.946083	0.0866345	1	1	MIC10_YEAST
biological_process	GO:0005992	trehalose biosynthetic process	1	7	0.142857	0.918516	0.399201	1	1	TSL1_YEAST
biological_process	GO:0030003	cellular cation homeostasis	1	9	0.111111	0.451886	0.672425	1	1	HAL5_YEAST
biological_process	GO:0035376	sterol import	1	6	0.166667	0.939029	0.353813	1	1	CLA4_YEAST
biological_process	GO:0008654	phospholipid biosynthetic process	1	19	0.0526316	0.77287	0.342172	1	1	OPI1_YEAST
biological_process	GO:0055092	sterol homeostasis	1	4	0.25	0.957406	0.305006	1	1	SET1_YEAST
biological_process	GO:2001040	positive regulation of cellular response to drug	1	3	0.333333	0.985957	0.196089	1	1	CRZ1_YEAST
biological_process	GO:0046677	response to antibiotic	1	7	0.142857	0.918516	0.399201	1	1	PBS2_YEAST
biological_process	GO:2000251	positive regulation of actin cytoskeleton reorganization	1	7	0.142857	0.918516	0.399201	1	1	BNR1_YEAST
biological_process	GO:0000001	mitochondrion inheritance	1	25	0.04	0.467821	0.838446	1	1	YPT11_YEAST
biological_process	GO:0007032	endosome organization	1	11	0.0909091	0.820815	0.439288	1	1	BOI2_YEAST
biological_process	GO:0045053	protein retention in Golgi apparatus	1	15	0.0666667	0.71595	0.664674	1	1	VPS27_YEAST
biological_process	GO:0006656	phosphatidylcholine biosynthetic process	1	11	0.0909091	0.662748	0.710207	1	1	PSD2_YEAST
biological_process	GO:0003400	regulation of COPII vesicle coating	1	5	0.2	0.957406	0.305006	1	1	PEF1_YEAST
biological_process	GO:0005977	glycogen metabolic process	1	13	0.0769231	0.787103	0.430386	1	1	PCL8_YEAST
biological_process	GO:0045719	negative regulation of glycogen biosynthetic process	1	5	0.2	0.957406	0.305006	1	1	PCL8_YEAST
biological_process	GO:0031106	septin ring organization	1	11	0.0909091	0.588804	0.684484	1	1	CLA4_YEAST
biological_process	GO:0070987	error-free translesion synthesis	1	12	0.0833333	0.796073	0.582661	1	1	PSY3_YEAST
biological_process	GO:0034087	establishment of mitotic sister chromatid cohesion	1	17	0.0588235	0.662748	0.710207	1	1	MPS3_YEAST
biological_process	GO:0006301	postreplication repair	1	13	0.0769231	0.647386	0.632703	1	1	RAD52_YEAST
biological_process	GO:0010821	regulation of mitochondrion organization	1	2	0.5	0.636568	0.730605	1	1	PCP1_YEAST
biological_process	GO:0071466	cellular response to xenobiotic stimulus	1	3	0.333333	0.896257	0.441409	1	1	TRM9_YEAST
biological_process	GO:0001682	tRNA 5'-leader removal	1	11	0.0909091	0.822251	0.5511	1	1	POP1_YEAST
biological_process	GO:1900364	negative regulation of mRNA polyadenylation	1	2	0.5	0.99509	0.135407	1	1	NAB2_YEAST
biological_process	GO:0030846	termination of RNA polymerase II transcription, poly(A)-coupled	1	6	0.166667	0.918516	0.399201	1	1	PCF11_YEAST
biological_process	GO:0007035	vacuolar acidification	1	29	0.0344828	0.385969	0.879419	1	1	DBF2_YEAST
biological_process	GO:0002181	cytoplasmic translation	1	148	0.00675676	0.0151667	0.994289	0.916	1	RS20_YEAST
biological_process	GO:0051568	histone H3-K4 methylation	1	12	0.0833333	0.610789	0.749571	1	1	SET1_YEAST
biological_process	GO:0051304	chromosome separation	1	3	0.333333	0.572198	0.628964	1	1	SMC6_YEAST
biological_process	GO:0000725	recombinational repair	1	16	0.0625	0.530531	0.634014	1	1	PSY3_YEAST
biological_process	GO:0071139	resolution of recombination intermediates	1	2	0.5	0.99509	0.135407	1	1	SMC6_YEAST
biological_process	GO:0000494	box C/D RNA 3'-end processing	1	8	0.125	0.896257	0.441409	1	1	SRO9_YEAST
biological_process	GO:0000470	maturation of LSU-rRNA	1	20	0.05	0.397704	0.793789	1	1	SNF6_YEAST
biological_process	GO:0042026	protein refolding	1	28	0.0357143	0.405358	0.870268	1	1	JJJ2_YEAST
biological_process	GO:0000054	ribosomal subunit export from nucleus	1	11	0.0909091	0.83533	0.313863	1	1	GSP1_YEAST
biological_process	GO:0000747	conjugation with cellular fusion	1	15	0.0666667	0.966616	0.0648464	1	1	BEM1_YEAST
biological_process	GO:0045454	cell redox homeostasis	1	23	0.0434783	0.512959	0.813019	1	1	MDS3_YEAST
biological_process	GO:0016042	lipid catabolic process	1	13	0.0769231	0.162868	0.945596	1	1	SPO14_YEAST
biological_process	GO:0046020	negative regulation of transcription from RNA polymerase II promoter by pheromones	1	10	0.1	0.847837	0.517159	1	1	DIG1_YEAST
biological_process	GO:0000196	cell wall integrity MAPK cascade	1	10	0.1	0.847837	0.517159	1	1	SLT2_YEAST
biological_process	GO:0007232	osmosensory signaling pathway via Sho1 osmosensor	1	7	0.142857	0.918516	0.399201	1	1	MSB2_YEAST
biological_process	GO:0000750	pheromone-dependent signal transduction involved in conjugation with cellular fusion	1	23	0.0434783	0.425466	0.860424	1	1	GBG_YEAST
biological_process	GO:0010525	regulation of transposition, RNA-mediated	1	6	0.166667	0.71595	0.664674	1	1	RAD25_YEAST
biological_process	GO:0090307	mitotic spindle assembly	1	6	0.166667	0.662748	0.710207	1	1	CIN8_YEAST
biological_process	GO:0030476	ascospore wall assembly	1	48	0.0208333	0.139504	0.970047	1	1	AMA1_YEAST
biological_process	GO:0030163	protein catabolic process	1	14	0.0714286	0.947035	0.0803086	1	1	SUE1_YEAST
biological_process	GO:0006816	calcium ion transport	1	9	0.111111	0.71595	0.664674	1	1	ATC2_YEAST
biological_process	GO:0042307	positive regulation of protein import into nucleus	1	3	0.333333	0.985957	0.196089	1	1	CLA4_YEAST
biological_process	GO:0000425	pexophagy	1	6	0.166667	0.939029	0.353813	1	1	PRTB_YEAST
biological_process	GO:0007114	cell budding	1	7	0.142857	0.977274	0.0565472	1	1	TAO3_YEAST
biological_process	GO:0032447	protein urmylation	1	7	0.142857	0.918516	0.399201	1	1	URE2_YEAST
biological_process	GO:0006879	cellular iron ion homeostasis	1	44	0.0227273	0.104603	0.979256	1	1	MTM1_YEAST
biological_process	GO:0006486	protein glycosylation	1	25	0.04	0.0690599	0.981006	1	1	MNL2_YEAST
biological_process	GO:0006878	cellular copper ion homeostasis	1	18	0.0555556	0.636568	0.730605	1	1	SLF1_YEAST
biological_process	GO:0030007	cellular potassium ion homeostasis	1	5	0.2	0.957406	0.305006	1	1	TRK1_YEAST
biological_process	GO:0030474	spindle pole body duplication	1	16	0.0625	0.689242	0.688268	1	1	MPS3_YEAST
biological_process	GO:2000815	regulation of mRNA stability involved in response to oxidative stress	1	4	0.25	0.973212	0.252523	1	1	PIN4_YEAST
biological_process	GO:0000372	Group I intron splicing	1	10	0.1	0.847837	0.517159	1	1	PET54_YEAST
biological_process	GO:0006873	cellular ion homeostasis	1	13	0.0769231	0.584976	0.53563	1	1	HRK1_YEAST
biological_process	GO:0071072	negative regulation of phospholipid biosynthetic process	1	3	0.333333	0.979072	0.127404	1	1	OPI1_YEAST
biological_process	GO:0033314	mitotic DNA replication checkpoint signaling	1	9	0.111111	0.872596	0.48066	1	1	DBF4_YEAST
biological_process	GO:0006267	pre-replicative complex assembly involved in nuclear cell cycle DNA replication	1	19	0.0526316	0.610789	0.749571	1	1	BMH2_YEAST
biological_process	GO:0071474	cellular hyperosmotic response	1	3	0.333333	0.939029	0.353813	1	1	PBS2_YEAST
biological_process	GO:0000165	MAPK cascade	1	4	0.25	0.951341	0.141992	1	1	PBS2_YEAST
biological_process	GO:0007021	tubulin complex assembly	1	10	0.1	0.847837	0.517159	1	1	PFD5_YEAST
biological_process	GO:0061414	positive regulation of transcription from RNA polymerase II promoter by a nonfermentable carbon source	1	4	0.25	0.973212	0.252523	1	1	SIP4_YEAST
biological_process	GO:0006363	termination of RNA polymerase I transcription	1	19	0.0526316	0.610789	0.749571	1	1	REB1_YEAST
biological_process	GO:0007189	adenylate cyclase-activating G protein-coupled receptor signaling pathway	1	3	0.333333	0.985957	0.196089	1	1	GPA2_YEAST
biological_process	GO:0032508	DNA duplex unwinding	1	13	0.0769231	0.367297	0.887927	1	1	RAD25_YEAST
biological_process	GO:0006310	DNA recombination	1	76	0.0131579	0.0849457	0.95101	1	1	YP41B_YEAST
biological_process	GO:0045144	meiotic sister chromatid segregation	1	9	0.111111	0.636568	0.730605	1	1	CIN8_YEAST
biological_process	GO:0010828	positive regulation of glucose transmembrane transport	1	5	0.2	0.957406	0.305006	1	1	GRR1_YEAST
biological_process	GO:0031146	SCF-dependent proteasomal ubiquitin-dependent protein catabolic process	1	20	0.05	0.585483	0.767206	1	1	GRR1_YEAST
biological_process	GO:0071169	establishment of protein localization to chromatin	1	4	0.25	0.973212	0.252523	1	1	HAP1_YEAST
biological_process	GO:0006312	mitotic recombination	1	18	0.0555556	0.25873	0.901325	1	1	RAD52_YEAST
biological_process	GO:0007004	telomere maintenance via telomerase	1	15	0.0666667	0.512959	0.813019	1	1	CDC13_YEAST
biological_process	GO:0043087	regulation of GTPase activity	1	13	0.0769231	0.728021	0.469517	1	1	TRS33_YEAST
biological_process	GO:0007264	small GTPase mediated signal transduction	1	19	0.0526316	0.870371	0.239033	1	1	RAEP_YEAST
biological_process	GO:0006412	translation	1	33	0.030303	0.201126	0.848446	1	1	ERF3_YEAST
biological_process	GO:0042254	ribosome biogenesis	1	38	0.0263158	0.0155107	0.991627	0.921	1	NAF1_YEAST
biological_process	GO:0042255	ribosome assembly	1	5	0.2	0.0276725	0.995899	0.99	1	IF2P_YEAST
biological_process	GO:0032511	late endosome to vacuole transport via multivesicular body sorting pathway	1	26	0.0384615	0.8249	0.328022	1	1	COPB2_YEAST
biological_process	GO:0072671	mitochondria-associated ubiquitin-dependent protein catabolic process	1	13	0.0769231	0.769514	0.612009	1	1	UBP6_YEAST
biological_process	GO:0045807	positive regulation of endocytosis	1	10	0.1	0.991541	0.0398298	1	1	HAL5_YEAST
biological_process	GO:0045732	positive regulation of protein catabolic process	1	6	0.166667	0.847837	0.517159	1	1	AMA1_YEAST
biological_process	GO:0006808	regulation of nitrogen utilization	1	5	0.2	0.982499	0.0830285	1	1	URE2_YEAST
biological_process	GO:0010795	regulation of ubiquinone biosynthetic process	1	3	0.333333	0.985957	0.196089	1	1	PUF3_YEAST
biological_process	GO:0043966	histone H3 acetylation	1	9	0.111111	0.689242	0.688268	1	1	HOG1_YEAST
biological_process	GO:0032014	positive regulation of ARF protein signal transduction	1	1	1	1	0.0701585	1	1	SYT1_YEAST
biological_process	GO:0034067	protein localization to Golgi apparatus	1	5	0.2	0.838539	0.414517	1	1	SYT1_YEAST
biological_process	GO:0045292	mRNA cis splicing, via spliceosome	1	8	0.125	0.71595	0.664674	1	1	LOT5_YEAST
biological_process	GO:0006970	response to osmotic stress	1	22	0.0454545	0.979008	0.0480569	1	1	MSB2_YEAST
biological_process	GO:0007052	mitotic spindle organization	1	17	0.0588235	0.643476	0.589735	1	1	FIN1_YEAST
biological_process	GO:0016233	telomere capping	1	6	0.166667	0.822251	0.5511	1	1	CDC13_YEAST
biological_process	GO:0098653	centromere clustering	1	3	0.333333	0.985957	0.196089	1	1	SPC25_YEAST
biological_process	GO:0045835	negative regulation of meiotic nuclear division	1	9	0.111111	0.802593	0.463477	1	1	SET3_YEAST
biological_process	GO:0071454	cellular response to anoxia	1	3	0.333333	0.985957	0.196089	1	1	PACC_YEAST
biological_process	GO:0070676	intralumenal vesicle formation	1	7	0.142857	0.918516	0.399201	1	1	UBP4_YEAST
biological_process	GO:0045722	positive regulation of gluconeogenesis	1	3	0.333333	0.985957	0.196089	1	1	SIP4_YEAST
biological_process	GO:0044257	cellular protein catabolic process	1	8	0.125	0.946379	0.0817829	1	1	ASK10_YEAST
biological_process	GO:0007034	vacuolar transport	1	18	0.0555556	0.933404	0.108073	1	1	YD089_YEAST
biological_process	GO:0006865	amino acid transport	1	16	0.0625	0.093061	0.982093	1	1	GNP1_YEAST
biological_process	GO:0010508	positive regulation of autophagy	1	11	0.0909091	0.905156	0.22813	1	1	SFL1_YEAST
biological_process	GO:0016311	dephosphorylation	1	12	0.0833333	0.783898	0.335571	1	1	TSL1_YEAST
biological_process	GO:0009968	negative regulation of signal transduction	1	5	0.2	0.814208	0.342245	1	1	TAP42_YEAST
biological_process	GO:0043666	regulation of phosphoprotein phosphatase activity	1	10	0.1	0.838539	0.414517	1	1	SA155_YEAST
biological_process	GO:1903024	positive regulation of ascospore-type prospore membrane formation	1	4	0.25	0.973212	0.252523	1	1	AMA1_YEAST
biological_process	GO:0032196	transposition	1	3	0.333333	0.0378487	0.988382	0.999	1	YP41B_YEAST
biological_process	GO:1990683	DNA double-strand break attachment to nuclear envelope	1	5	0.2	0.957406	0.305006	1	1	SMC6_YEAST
biological_process	GO:0045332	phospholipid translocation	1	13	0.0769231	0.585483	0.767206	1	1	ATC5_YEAST
biological_process	GO:0006276	plasmid maintenance	1	6	0.166667	0.742753	0.639299	1	1	RSC2_YEAST
biological_process	GO:0070914	UV-damage excision repair	1	3	0.333333	0.985957	0.196089	1	1	RSC2_YEAST
biological_process	GO:0033262	regulation of nuclear cell cycle DNA replication	1	4	0.25	0.997738	0.0209277	1	1	HOG1_YEAST
biological_process	GO:0061587	transfer RNA gene-mediated silencing	1	14	0.0714286	0.742753	0.639299	1	1	SIN3_YEAST
biological_process	GO:0070124	mitochondrial translational initiation	1	7	0.142857	0.896257	0.441409	1	1	RSM28_YEAST
biological_process	GO:0071400	cellular response to oleic acid	1	3	0.333333	0.985957	0.196089	1	1	ACA2_YEAST
biological_process	GO:0016559	peroxisome fission	1	11	0.0909091	0.822251	0.5511	1	1	CAF4_YEAST
biological_process	GO:0007029	endoplasmic reticulum organization	1	11	0.0909091	0.845484	0.299788	1	1	RTN1_YEAST
biological_process	GO:0071788	endoplasmic reticulum tubular network maintenance	1	2	0.5	0.99509	0.135407	1	1	RTN1_YEAST
biological_process	GO:0016560	protein import into peroxisome matrix, docking	1	6	0.166667	0.939029	0.353813	1	1	PEX17_YEAST
biological_process	GO:0006487	protein N-linked glycosylation	1	46	0.0217391	0.11086	0.977674	1	1	ANP1_YEAST
biological_process	GO:0010499	proteasomal ubiquitin-independent protein catabolic process	1	17	0.0588235	0.662748	0.710207	1	1	PSA4_YEAST
biological_process	GO:0061188	negative regulation of ribosomal DNA heterochromatin assembly	1	8	0.125	0.896257	0.441409	1	1	SIN3_YEAST
biological_process	GO:0009166	nucleotide catabolic process	1	3	0.333333	0.847837	0.517159	1	1	YH02_YEAST
biological_process	GO:0061163	endoplasmic reticulum polarization	1	3	0.333333	0.985957	0.196089	1	1	YM11_YEAST
biological_process	GO:1902953	positive regulation of ER to Golgi vesicle-mediated transport	1	5	0.2	0.957406	0.305006	1	1	SEC24_YEAST
biological_process	GO:0070863	positive regulation of protein exit from endoplasmic reticulum	1	5	0.2	0.957406	0.305006	1	1	SEC24_YEAST
biological_process	GO:0006616	SRP-dependent cotranslational protein targeting to membrane, translocation	1	13	0.0769231	0.769514	0.612009	1	1	SRP54_YEAST
biological_process	GO:0006893	Golgi to plasma membrane transport	1	22	0.0454545	0.299635	0.916375	1	1	SEC3_YEAST
biological_process	GO:0016925	protein sumoylation	1	13	0.0769231	0.872186	0.363432	1	1	APJ1_YEAST
biological_process	GO:0000086	G2/M transition of mitotic cell cycle	1	23	0.0434783	0.960617	0.100046	1	1	PIN4_YEAST
biological_process	GO:0090502	RNA phosphodiester bond hydrolysis, endonucleolytic	1	9	0.111111	0.0426447	0.993125	1	1	POP1_YEAST
biological_process	GO:0030150	protein import into mitochondrial matrix	1	26	0.0384615	0.446289	0.849836	1	1	TOM70_YEAST
biological_process	GO:0045040	protein insertion into mitochondrial outer membrane	1	16	0.0625	0.689242	0.688268	1	1	TOM70_YEAST
biological_process	GO:0010458	exit from mitosis	1	8	0.125	0.984749	0.0436064	1	1	APC1_YEAST
biological_process	GO:2000766	negative regulation of cytoplasmic translation	1	4	0.25	0.973212	0.252523	1	1	KAPB_YEAST
biological_process	GO:0007096	regulation of exit from mitosis	1	13	0.0769231	0.947803	0.134634	1	1	CLA4_YEAST
biological_process	GO:0043254	regulation of protein-containing complex assembly	1	7	0.142857	0.983371	0.0354761	1	1	GAL83_YEAST
biological_process	GO:0045899	positive regulation of RNA polymerase II transcription preinitiation complex assembly	1	11	0.0909091	0.822251	0.5511	1	1	SGF73_YEAST
biological_process	GO:1903341	regulation of meiotic DNA double-strand break formation	1	3	0.333333	0.97163	0.152163	1	1	SET1_YEAST
biological_process	GO:0006614	SRP-dependent cotranslational protein targeting to membrane	1	10	0.1	0.585483	0.767206	1	1	SRP54_YEAST
biological_process	GO:0050708	regulation of protein secretion	1	3	0.333333	0.973212	0.252523	1	1	CBK1_YEAST
biological_process	GO:0016540	protein autoprocessing	1	3	0.333333	0.985957	0.196089	1	1	PSD2_YEAST
biological_process	GO:0016485	protein processing	1	14	0.0714286	0.546286	0.678688	1	1	COX20_YEAST
biological_process	GO:0075297	negative regulation of ascospore formation	1	2	0.5	0.99509	0.135407	1	1	MDS3_YEAST
biological_process	GO:0045945	positive regulation of transcription by RNA polymerase III	1	3	0.333333	0.985957	0.196089	1	1	NAB2_YEAST
biological_process	GO:0090630	activation of GTPase activity	1	14	0.0714286	0.742753	0.639299	1	1	RAEP_YEAST
biological_process	GO:0002092	positive regulation of receptor internalization	1	3	0.333333	0.985957	0.196089	1	1	LDB19_YEAST
biological_process	GO:0043928	exonucleolytic catabolism of deadenylated mRNA	1	6	0.166667	0.939029	0.353813	1	1	POP2_YEAST
biological_process	GO:0000467	exonucleolytic trimming to generate mature 3'-end of 5.8S rRNA from tricistronic rRNA transcript (SSU-rRNA, 5.8S rRNA, LSU-rRNA)	1	18	0.0555556	0.636568	0.730605	1	1	GSP1_YEAST
biological_process	GO:1900153	positive regulation of nuclear-transcribed mRNA catabolic process, deadenylation-dependent decay	1	4	0.25	0.973212	0.252523	1	1	EDC3_YEAST
biological_process	GO:0048208	COPII vesicle coating	1	1	1	0.994161	0.060971	1	1	SEC16_YEAST
biological_process	GO:0070973	protein localization to endoplasmic reticulum exit site	1	4	0.25	0.973212	0.252523	1	1	SEC16_YEAST
biological_process	GO:0006415	translational termination	1	12	0.0833333	0.512959	0.813019	1	1	ERF3_YEAST
biological_process	GO:0035973	aggrephagy	1	1	1	1	0.0701585	1	1	SNF2_YEAST
biological_process	GO:0042766	nucleosome mobilization	1	12	0.0833333	0.796073	0.582661	1	1	SNF2_YEAST
biological_process	GO:1900189	positive regulation of cell adhesion involved in single-species biofilm formation	1	1	1	1	0.0701585	1	1	SNF2_YEAST
biological_process	GO:0042148	strand invasion	1	4	0.25	0.939029	0.353813	1	1	SNF2_YEAST
biological_process	GO:0048015	phosphatidylinositol-mediated signaling	1	4	0.25	0.957406	0.305006	1	1	STT4_YEAST
biological_process	GO:0006508	proteolysis	1	28	0.0357143	0.931421	0.0990771	1	1	AMA1_YEAST
biological_process	GO:0006998	nuclear envelope organization	1	7	0.142857	0.847837	0.517159	1	1	MPS3_YEAST
biological_process	GO:0071071	regulation of phospholipid biosynthetic process	1	4	0.25	0.994943	0.02731	1	1	NTE1_YEAST
biological_process	GO:0042407	cristae formation	1	10	0.1	0.847837	0.517159	1	1	MIC10_YEAST
biological_process	GO:0032298	positive regulation of DNA-dependent DNA replication initiation	1	4	0.25	0.996921	0.0425936	1	1	FKH2_YEAST
biological_process	GO:0045860	positive regulation of protein kinase activity	1	8	0.125	0.916893	0.235043	1	1	DBF4_YEAST
biological_process	GO:0032079	positive regulation of endodeoxyribonuclease activity	1	5	0.2	0.957406	0.305006	1	1	VTS1_YEAST
biological_process	GO:0001927	exocyst assembly	1	4	0.25	0.973212	0.252523	1	1	SEC3_YEAST
biological_process	GO:0051601	exocyst localization	1	4	0.25	0.939029	0.353813	1	1	SEC3_YEAST
biological_process	GO:0090522	vesicle tethering involved in exocytosis	1	8	0.125	0.896257	0.441409	1	1	SEC3_YEAST
biological_process	GO:0006749	glutathione metabolic process	1	16	0.0625	0.49005	0.826196	1	1	URE2_YEAST
biological_process	GO:0006565	L-serine catabolic process	1	3	0.333333	0.985957	0.196089	1	1	GLYC_YEAST
biological_process	GO:0031321	ascospore-type prospore assembly	1	6	0.166667	0.745687	0.532179	1	1	SPO14_YEAST
biological_process	GO:0003333	amino acid transmembrane transport	1	25	0.04	0.206246	0.949934	1	1	GNP1_YEAST
biological_process	GO:0010603	regulation of cytoplasmic mRNA processing body assembly	1	3	0.333333	0.994708	0.0370237	1	1	DHH1_YEAST
biological_process	GO:1903452	positive regulation of G1 to G0 transition	1	4	0.25	0.973212	0.252523	1	1	WHI2_YEAST
biological_process	GO:0051666	actin cortical patch localization	1	17	0.0588235	0.662748	0.710207	1	1	RV167_YEAST
biological_process	GO:0060988	lipid tube assembly	1	3	0.333333	0.985957	0.196089	1	1	RV167_YEAST
biological_process	GO:0097320	plasma membrane tubulation	1	3	0.333333	0.973212	0.252523	1	1	RV167_YEAST
biological_process	GO:0072741	protein localization to cell division site	1	4	0.25	0.98643	0.0699231	1	1	RV167_YEAST
biological_process	GO:0045333	cellular respiration	1	31	0.0322581	0.704776	0.427523	1	1	QCR6_YEAST
biological_process	GO:0045039	protein insertion into mitochondrial inner membrane	1	12	0.0833333	0.796073	0.582661	1	1	TOM70_YEAST
biological_process	GO:0045947	negative regulation of translational initiation	1	4	0.25	0.973212	0.252523	1	1	PAT1_YEAST
biological_process	GO:0051974	negative regulation of telomerase activity	1	5	0.2	0.957406	0.305006	1	1	CDC13_YEAST
biological_process	GO:0032210	regulation of telomere maintenance via telomerase	1	4	0.25	0.847837	0.517159	1	1	CDC13_YEAST
biological_process	GO:0071470	cellular response to osmotic stress	1	6	0.166667	0.953188	0.124065	1	1	ROX1_YEAST
biological_process	GO:0060962	regulation of ribosomal protein gene transcription by RNA polymerase II	1	8	0.125	0.96017	0.14431	1	1	IFH1_YEAST
biological_process	GO:0002183	cytoplasmic translational initiation	1	4	0.25	0.883238	0.293423	1	1	EI2BG_YEAST
biological_process	GO:1903574	negative regulation of cellular response to amino acid starvation	1	1	1	1	0.0701585	1	1	EI2BG_YEAST
biological_process	GO:0071218	cellular response to misfolded protein	1	4	0.25	0.536523	0.798846	1	1	HLJ1_YEAST
biological_process	GO:0035066	positive regulation of histone acetylation	1	8	0.125	0.872596	0.48066	1	1	SET1_YEAST
biological_process	GO:0071469	cellular response to alkaline pH	1	5	0.2	0.99031	0.0814835	1	1	PACC_YEAST
biological_process	GO:0071472	cellular response to salt stress	1	10	0.1	0.796073	0.582661	1	1	PSR1_YEAST
biological_process	GO:0043248	proteasome assembly	1	19	0.0526316	0.588804	0.684484	1	1	RPN10_YEAST
biological_process	GO:0006696	ergosterol biosynthetic process	1	25	0.04	0.647386	0.632703	1	1	ERG13_YEAST
biological_process	GO:0070550	rDNA condensation	1	13	0.0769231	0.769514	0.612009	1	1	SIN3_YEAST
biological_process	GO:0070842	aggresome assembly	1	1	1	1	0.0701585	1	1	BMH1_YEAST
biological_process	GO:0031578	mitotic spindle orientation checkpoint signaling	1	14	0.0714286	0.742753	0.639299	1	1	BMH1_YEAST
biological_process	GO:0070649	formin-nucleated actin cable assembly	1	5	0.2	0.689242	0.688268	1	1	BNR1_YEAST
biological_process	GO:0098718	serine import across plasma membrane	1	2	0.5	0.99509	0.135407	1	1	GNP1_YEAST
biological_process	GO:0016241	regulation of macroautophagy	1	3	0.333333	0.831413	0.340158	1	1	HOG1_YEAST
biological_process	GO:0051403	stress-activated MAPK cascade	1	1	1	0.872186	0.363432	1	1	HOG1_YEAST
biological_process	GO:0046655	folic acid metabolic process	1	2	0.5	0.985294	0.103743	1	1	GLYC_YEAST
biological_process	GO:0019264	glycine biosynthetic process from serine	1	2	0.5	0.99509	0.135407	1	1	GLYC_YEAST
biological_process	GO:0006730	one-carbon metabolic process	1	14	0.0714286	0.610789	0.749571	1	1	GLYC_YEAST
biological_process	GO:0035999	tetrahydrofolate interconversion	1	7	0.142857	0.918516	0.399201	1	1	GLYC_YEAST
biological_process	GO:0046653	tetrahydrofolate metabolic process	1	2	0.5	0.953137	0.203927	1	1	GLYC_YEAST
biological_process	GO:0006491	N-glycan processing	1	8	0.125	0.896257	0.441409	1	1	MNL2_YEAST
biological_process	GO:0001731	formation of translation preinitiation complex	1	13	0.0769231	0.610789	0.749571	1	1	PAT1_YEAST
biological_process	GO:0009102	biotin biosynthetic process	1	6	0.166667	0.939029	0.353813	1	1	BIOD_YEAST
biological_process	GO:0000032	cell wall mannoprotein biosynthetic process	1	20	0.05	0.585483	0.767206	1	1	ANP1_YEAST
biological_process	GO:0031030	negative regulation of septation initiation signaling	1	5	0.2	0.957406	0.305006	1	1	NET1_YEAST
biological_process	GO:0007127	meiosis I	1	3	0.333333	0.859457	0.238711	1	1	AMA1_YEAST
biological_process	GO:0045132	meiotic chromosome segregation	1	11	0.0909091	0.862737	0.249827	1	1	AMA1_YEAST
biological_process	GO:0044778	meiotic DNA integrity checkpoint signaling	1	2	0.5	0.99509	0.135407	1	1	AMA1_YEAST
biological_process	GO:1905786	positive regulation of anaphase-promoting complex-dependent catabolic process	1	3	0.333333	0.985957	0.196089	1	1	AMA1_YEAST
biological_process	GO:1904668	positive regulation of ubiquitin protein ligase activity	1	4	0.25	0.973212	0.252523	1	1	AMA1_YEAST
biological_process	GO:0046656	folic acid biosynthetic process	1	6	0.166667	0.939029	0.353813	1	1	ADCS_YEAST
biological_process	GO:0008153	para-aminobenzoic acid biosynthetic process	1	1	1	1	0.0701585	1	1	ADCS_YEAST
biological_process	GO:0046654	tetrahydrofolate biosynthetic process	1	5	0.2	0.957406	0.305006	1	1	ADCS_YEAST
biological_process	GO:0007039	protein catabolic process in the vacuole	1	12	0.0833333	0.796073	0.582661	1	1	PRTB_YEAST
biological_process	GO:0040020	regulation of meiotic nuclear division	1	7	0.142857	0.974839	0.077572	1	1	IME1_YEAST
biological_process	GO:0071230	cellular response to amino acid stimulus	1	7	0.142857	0.872596	0.48066	1	1	KOG1_YEAST
biological_process	GO:0030307	positive regulation of cell growth	1	4	0.25	0.916971	0.28405	1	1	KOG1_YEAST
biological_process	GO:0010506	regulation of autophagy	1	5	0.2	0.849735	0.279051	1	1	KOG1_YEAST
biological_process	GO:0000282	cellular bud site selection	1	15	0.0666667	0.947803	0.134634	1	1	MSB2_YEAST
biological_process	GO:0001732	formation of cytoplasmic translation initiation complex	1	10	0.1	0.847837	0.517159	1	1	IF2P_YEAST
biological_process	GO:0043967	histone H4 acetylation	1	8	0.125	0.97163	0.152163	1	1	SWC4_YEAST
biological_process	GO:0007186	G protein-coupled receptor signaling pathway	1	5	0.2	0.953137	0.203927	1	1	GBG_YEAST
biological_process	GO:0009757	hexose mediated signaling	1	2	0.5	0.992495	0.0468633	1	1	GPA2_YEAST
biological_process	GO:0006654	phosphatidic acid biosynthetic process	1	8	0.125	0.896257	0.441409	1	1	SPO14_YEAST
biological_process	GO:0001934	positive regulation of protein phosphorylation	1	8	0.125	0.865366	0.29134	1	1	MOB2_YEAST
biological_process	GO:0032465	regulation of cytokinesis	1	10	0.1	0.937838	0.169155	1	1	DBF2_YEAST
biological_process	GO:0006275	regulation of DNA replication	1	3	0.333333	0.97946	0.0520377	1	1	UBP4_YEAST
biological_process	GO:0006644	phospholipid metabolic process	1	13	0.0769231	0.618717	0.501314	1	1	SPO14_YEAST
biological_process	GO:0006400	tRNA modification	1	28	0.0357143	0.0727843	0.97977	1	1	TRM9_YEAST
biological_process	GO:0006646	phosphatidylethanolamine biosynthetic process	1	7	0.142857	0.918516	0.399201	1	1	PSD2_YEAST
biological_process	GO:0042542	response to hydrogen peroxide	1	6	0.166667	0.838539	0.414517	1	1	WHI2_YEAST
biological_process	GO:0018027	peptidyl-lysine dimethylation	1	6	0.166667	0.939029	0.353813	1	1	SET1_YEAST
biological_process	GO:0019236	response to pheromone	1	11	0.0909091	0.891065	0.194568	1	1	CLA4_YEAST
biological_process	GO:0009594	detection of nutrient	1	2	0.5	0.99509	0.135407	1	1	HAL5_YEAST
biological_process	GO:0031047	gene silencing by RNA	1	4	0.25	0.957406	0.305006	1	1	HDA1_YEAST
biological_process	GO:0010621	negative regulation of transcription by transcription factor localization	1	1	1	1	0.0701585	1	1	HDA1_YEAST
biological_process	GO:0006282	regulation of DNA repair	1	3	0.333333	0.802593	0.463477	1	1	RPN4_YEAST
biological_process	GO:0006688	glycosphingolipid biosynthetic process	1	3	0.333333	0.985957	0.196089	1	1	CSG2_YEAST
biological_process	GO:0006676	mannosyl diphosphorylinositol ceramide metabolic process	1	4	0.25	0.973212	0.252523	1	1	CSG2_YEAST
biological_process	GO:0008156	negative regulation of DNA replication	1	3	0.333333	0.902905	0.310758	1	1	SML1_YEAST
biological_process	GO:0044804	autophagy of nucleus	1	11	0.0909091	0.956394	0.108305	1	1	SIN3_YEAST
biological_process	GO:1900152	negative regulation of nuclear-transcribed mRNA catabolic process, deadenylation-dependent decay	1	3	0.333333	0.985957	0.196089	1	1	NAB2_YEAST
biological_process	GO:0060303	regulation of nucleosome density	1	6	0.166667	0.939029	0.353813	1	1	CKS1_YEAST
biological_process	GO:0032467	positive regulation of cytokinesis	1	2	0.5	0.847837	0.517159	1	1	EDE1_YEAST
biological_process	GO:0045901	positive regulation of translational elongation	1	4	0.25	0.973212	0.252523	1	1	WHI3_YEAST
biological_process	GO:0000709	meiotic joint molecule formation	1	5	0.2	0.939029	0.353813	1	1	RAD52_YEAST
biological_process	GO:0000751	mitotic cell cycle G1 arrest in response to pheromone	1	3	0.333333	0.985957	0.196089	1	1	GRR1_YEAST
biological_process	GO:0016255	attachment of GPI anchor to protein	1	5	0.2	0.957406	0.305006	1	1	GAA1_YEAST
biological_process	GO:0000162	tryptophan biosynthetic process	1	6	0.166667	0.939029	0.353813	1	1	TRPE_YEAST
biological_process	GO:0030011	maintenance of cell polarity	1	13	0.0769231	0.769514	0.612009	1	1	OSH3_YEAST
biological_process	GO:0002184	cytoplasmic translational termination	1	2	0.5	0.99509	0.135407	1	1	ERF3_YEAST
biological_process	GO:0048017	inositol lipid-mediated signaling	1	6	0.166667	0.962976	0.177749	1	1	SPO14_YEAST
biological_process	GO:0000743	nuclear migration involved in conjugation with cellular fusion	1	6	0.166667	0.939029	0.353813	1	1	MPS3_YEAST
biological_process	GO:0038083	peptidyl-tyrosine autophosphorylation	1	1	1	1	0.0701585	1	1	HRR25_YEAST
biological_process	GO:0018108	peptidyl-tyrosine phosphorylation	1	1	1	1	0.0701585	1	1	HRR25_YEAST
biological_process	GO:2000785	regulation of autophagosome assembly	1	4	0.25	0.769514	0.612009	1	1	HRR25_YEAST
biological_process	GO:0106214	regulation of vesicle fusion with Golgi apparatus	1	1	1	1	0.0701585	1	1	HRR25_YEAST
biological_process	GO:0045033	peroxisome inheritance	1	5	0.2	0.957406	0.305006	1	1	PEX3_YEAST
biological_process	GO:2000819	regulation of nucleotide-excision repair	1	1	1	0.896257	0.441409	1	1	IXR1_YEAST
biological_process	GO:0090069	regulation of ribosome biogenesis	1	1	1	0.99509	0.135407	1	1	IXR1_YEAST
biological_process	GO:0072718	response to cisplatin	1	1	1	1	0.0701585	1	1	IXR1_YEAST
biological_process	GO:0060188	regulation of protein desumoylation	1	4	0.25	0.973212	0.252523	1	1	NUP53_YEAST
biological_process	GO:0042994	cytoplasmic sequestering of transcription factor	1	2	0.5	0.99509	0.135407	1	1	URE2_YEAST
biological_process	GO:0051654	establishment of mitochondrion localization	1	5	0.2	0.994161	0.060971	1	1	JSN1_YEAST
biological_process	GO:0000972	transcription-dependent tethering of RNA polymerase II gene DNA at nuclear periphery	1	11	0.0909091	0.983894	0.0637803	1	1	NU170_YEAST
biological_process	GO:0007188	adenylate cyclase-modulating G protein-coupled receptor signaling pathway	1	4	0.25	0.896257	0.441409	1	1	GPA2_YEAST
biological_process	GO:0110136	protein-RNA complex remodeling	1	3	0.333333	0.985957	0.196089	1	1	YTM1_YEAST
biological_process	GO:0000073	initial mitotic spindle pole body separation	1	4	0.25	0.769514	0.612009	1	1	CIN8_YEAST
biological_process	GO:1901857	positive regulation of cellular respiration	1	3	0.333333	0.985957	0.196089	1	1	RAD53_YEAST
biological_process	GO:0006147	guanine catabolic process	1	1	1	1	0.0701585	1	1	GUAD_YEAST
biological_process	GO:0046098	guanine metabolic process	1	1	1	0.99509	0.135407	1	1	GUAD_YEAST
biological_process	GO:0018344	protein geranylgeranylation	1	5	0.2	0.957406	0.305006	1	1	RAEP_YEAST
biological_process	GO:0034965	intronic box C/D RNA processing	1	9	0.111111	0.872596	0.48066	1	1	POP1_YEAST
biological_process	GO:0000294	nuclear-transcribed mRNA catabolic process, endonucleolytic cleavage-dependent decay	1	10	0.1	0.847837	0.517159	1	1	POP1_YEAST
biological_process	GO:0048024	regulation of mRNA splicing, via spliceosome	1	3	0.333333	0.994161	0.060971	1	1	SRO9_YEAST
biological_process	GO:2000601	positive regulation of Arp2/3 complex-mediated actin nucleation	1	8	0.125	0.896257	0.441409	1	1	PAN1_YEAST
biological_process	GO:1901925	negative regulation of protein import into nucleus during spindle assembly checkpoint	1	4	0.25	0.973212	0.252523	1	1	MLP1_YEAST
biological_process	GO:0090204	protein localization to nuclear pore	1	1	1	1	0.0701585	1	1	MLP1_YEAST
biological_process	GO:0010447	response to acidic pH	1	5	0.2	0.962976	0.177749	1	1	SLT2_YEAST
biological_process	GO:0045842	positive regulation of mitotic metaphase/anaphase transition	1	9	0.111111	0.962976	0.177749	1	1	CDC27_YEAST
biological_process	GO:1902426	deactivation of mitotic spindle assembly checkpoint	1	3	0.333333	0.985957	0.196089	1	1	FIN1_YEAST
biological_process	GO:0045104	intermediate filament cytoskeleton organization	1	1	1	1	0.0701585	1	1	FIN1_YEAST
biological_process	GO:0006673	inositol phosphoceramide metabolic process	1	5	0.2	0.985294	0.103743	1	1	TLG2_YEAST
biological_process	GO:0061136	regulation of proteasomal protein catabolic process	1	3	0.333333	0.962976	0.177749	1	1	UBP6_YEAST
biological_process	GO:1900191	negative regulation of single-species biofilm formation	1	1	1	1	0.0701585	1	1	CYC8_YEAST
biological_process	GO:0006515	protein quality control for misfolded or incompletely synthesized proteins	1	13	0.0769231	0.349336	0.895835	1	1	MCA1_YEAST
biological_process	GO:0035621	ER to Golgi ceramide transport	1	5	0.2	0.957406	0.305006	1	1	OSH3_YEAST
biological_process	GO:0080182	histone H3-K4 trimethylation	1	5	0.2	0.957406	0.305006	1	1	SET1_YEAST
biological_process	GO:0000076	DNA replication checkpoint signaling	1	8	0.125	0.902905	0.310758	1	1	CCR4_YEAST
biological_process	GO:0048478	replication fork protection	1	6	0.166667	0.939029	0.353813	1	1	CCR4_YEAST
biological_process	GO:0006122	mitochondrial electron transport, ubiquinol to cytochrome c	1	13	0.0769231	0.769514	0.612009	1	1	QCR6_YEAST
biological_process	GO:0032515	negative regulation of phosphoprotein phosphatase activity	1	3	0.333333	0.939029	0.353813	1	1	SIS2_YEAST
biological_process	GO:0090419	negative regulation of transcription involved in G2/M transition of mitotic cell cycle	1	2	0.5	0.99509	0.135407	1	1	FKH2_YEAST
biological_process	GO:0042128	nitrate assimilation	1	3	0.333333	0.985957	0.196089	1	1	URE2_YEAST
biological_process	GO:0001080	nitrogen catabolite activation of transcription from RNA polymerase II promoter	1	6	0.166667	0.939029	0.353813	1	1	DAL81_YEAST
biological_process	GO:0036278	positive regulation of transcription from RNA polymerase II promoter in response to nitrogen starvation	1	5	0.2	0.957406	0.305006	1	1	MSN2_YEAST
biological_process	GO:1902275	regulation of chromatin organization	1	5	0.2	0.562239	0.664914	1	1	SET1_YEAST
biological_process	GO:0061402	positive regulation of transcription from RNA polymerase II promoter in response to acidic pH	1	3	0.333333	0.985957	0.196089	1	1	MSN2_YEAST
biological_process	GO:0010513	positive regulation of phosphatidylinositol biosynthetic process	1	3	0.333333	0.985957	0.196089	1	1	VAC7_YEAST
biological_process	GO:0006525	arginine metabolic process	1	4	0.25	0.689242	0.688268	1	1	MCM1_YEAST
biological_process	GO:0071211	protein targeting to vacuole involved in autophagy	1	3	0.333333	0.985957	0.196089	1	1	ATG13_YEAST
biological_process	GO:0007019	microtubule depolymerization	1	4	0.25	0.896257	0.441409	1	1	CIN8_YEAST
biological_process	GO:0045048	protein insertion into ER membrane	1	6	0.166667	0.769514	0.612009	1	1	MDY2_YEAST
biological_process	GO:0015918	sterol transport	1	14	0.0714286	0.706577	0.574534	1	1	OSH3_YEAST
biological_process	GO:0097352	autophagosome maturation	1	4	0.25	0.973212	0.252523	1	1	VAM3_YEAST
biological_process	GO:1905561	positive regulation of kinetochore assembly	1	2	0.5	0.99509	0.135407	1	1	DBF4_YEAST
biological_process	GO:0060903	positive regulation of meiosis I	1	2	0.5	0.99509	0.135407	1	1	DBF4_YEAST
biological_process	GO:1903343	positive regulation of meiotic DNA double-strand break formation	1	2	0.5	0.99509	0.135407	1	1	DBF4_YEAST
biological_process	GO:0006418	tRNA aminoacylation for protein translation	1	2	0.5	0.255937	0.932874	1	1	ARC1_YEAST
biological_process	GO:0034080	CENP-A containing chromatin assembly	1	1	1	1	0.0701585	1	1	ATAD2_YEAST
biological_process	GO:0010674	negative regulation of transcription from RNA polymerase II promoter involved in meiotic cell cycle	1	4	0.25	0.973212	0.252523	1	1	UME6_YEAST
biological_process	GO:0007018	microtubule-based movement	1	7	0.142857	0.783949	0.487041	1	1	CIN8_YEAST
biological_process	GO:0045141	meiotic telomere clustering	1	4	0.25	0.973212	0.252523	1	1	MPS3_YEAST
biological_process	GO:0045721	negative regulation of gluconeogenesis	1	11	0.0909091	0.822251	0.5511	1	1	GID8_YEAST
biological_process	GO:0045185	maintenance of protein location	1	3	0.333333	0.643476	0.589735	1	1	BEM1_YEAST
biological_process	GO:1901717	positive regulation of gamma-aminobutyric acid catabolic process	1	1	1	1	0.0701585	1	1	DAL81_YEAST
biological_process	GO:1901714	positive regulation of urea catabolic process	1	1	1	1	0.0701585	1	1	DAL81_YEAST
biological_process	GO:0006084	acetyl-CoA metabolic process	1	1	1	0.71595	0.664674	1	1	ERG13_YEAST
biological_process	GO:0010142	farnesyl diphosphate biosynthetic process, mevalonate pathway	1	3	0.333333	0.985957	0.196089	1	1	ERG13_YEAST
biological_process	GO:0000266	mitochondrial fission	1	8	0.125	0.872596	0.48066	1	1	CAF4_YEAST
biological_process	GO:0015074	DNA integration	1	47	0.0212766	0.117462	0.975972	1	1	YP41B_YEAST
biological_process	GO:0006817	phosphate ion transport	1	11	0.0909091	0.71595	0.664674	1	1	PHO91_YEAST
biological_process	GO:1903778	protein localization to vacuolar membrane	1	4	0.25	0.896257	0.441409	1	1	VAC7_YEAST
biological_process	GO:0010895	negative regulation of ergosterol biosynthetic process	1	1	1	1	0.0701585	1	1	MOT3_YEAST
biological_process	GO:0000741	karyogamy	1	7	0.142857	0.93622	0.197407	1	1	MPS3_YEAST
biological_process	GO:0006986	response to unfolded protein	1	10	0.1	0.989518	0.0298607	1	1	SCJ1_YEAST
biological_process	GO:0006390	mitochondrial transcription	1	3	0.333333	0.973212	0.252523	1	1	RSF1_YEAST
biological_process	GO:0043069	negative regulation of programmed cell death	1	1	1	0.99867	0.0147057	1	1	COX20_YEAST
biological_process	GO:1902884	positive regulation of response to oxidative stress	1	1	1	0.99509	0.135407	1	1	COX20_YEAST
biological_process	GO:0042256	mature ribosome assembly	1	6	0.166667	0.939029	0.353813	1	1	IF2P_YEAST
biological_process	GO:0007088	regulation of mitotic nuclear division	1	5	0.2	0.643476	0.589735	1	1	NUP53_YEAST
biological_process	GO:0010922	positive regulation of phosphatase activity	1	2	0.5	0.918516	0.399201	1	1	OSH3_YEAST
biological_process	GO:0090615	mitochondrial mRNA processing	1	8	0.125	0.896257	0.441409	1	1	PET54_YEAST
biological_process	GO:0070202	regulation of establishment of protein localization to chromosome	1	3	0.333333	0.985957	0.196089	1	1	MED15_YEAST
biological_process	GO:0032527	protein exit from endoplasmic reticulum	1	5	0.2	0.991541	0.0398298	1	1	TLG2_YEAST
biological_process	GO:0045046	protein import into peroxisome membrane	1	2	0.5	0.99509	0.135407	1	1	PEX3_YEAST
biological_process	GO:0061987	negative regulation of transcription from RNA polymerase II promoter by glucose	1	1	1	0.994708	0.0370237	1	1	MIG1_YEAST
biological_process	GO:2000679	positive regulation of transcription regulatory region DNA binding	1	3	0.333333	0.985957	0.196089	1	1	PHO2_YEAST
biological_process	GO:0001113	transcription open complex formation at RNA polymerase II promoter	1	5	0.2	0.957406	0.305006	1	1	RAD25_YEAST
biological_process	GO:0030488	tRNA methylation	1	23	0.0434783	0.512959	0.813019	1	1	TRM9_YEAST
biological_process	GO:0060211	regulation of nuclear-transcribed mRNA poly(A) tail shortening	1	4	0.25	0.957406	0.305006	1	1	PABP_YEAST
biological_process	GO:1905524	negative regulation of protein autoubiquitination	1	2	0.5	0.99509	0.135407	1	1	HRD3_YEAST
biological_process	GO:0071406	cellular response to methylmercury	1	4	0.25	0.973212	0.252523	1	1	GRR1_YEAST
biological_process	GO:0010512	negative regulation of phosphatidylinositol biosynthetic process	1	1	1	0.99509	0.135407	1	1	GTS1_YEAST
biological_process	GO:0061635	regulation of protein complex stability	1	2	0.5	0.99509	0.135407	1	1	DEF1_YEAST
biological_process	GO:0010571	positive regulation of nuclear cell cycle DNA replication	1	2	0.5	0.998701	0.0267877	1	1	DBF4_YEAST
biological_process	GO:0031671	primary cell septum biogenesis	1	2	0.5	0.99509	0.135407	1	1	MYO1_YEAST
biological_process	GO:0009063	cellular amino acid catabolic process	1	1	1	0.572198	0.628964	1	1	CHA4_YEAST
biological_process	GO:0007000	nucleolus organization	1	2	0.5	0.918516	0.399201	1	1	NET1_YEAST
biological_process	GO:1904751	positive regulation of protein localization to nucleolus	1	1	1	1	0.0701585	1	1	NET1_YEAST
biological_process	GO:0045859	regulation of protein kinase activity	1	3	0.333333	0.849735	0.279051	1	1	GAL83_YEAST
biological_process	GO:0006271	DNA strand elongation involved in DNA replication	1	9	0.111111	0.405358	0.870268	1	1	MCM10_YEAST
biological_process	GO:1902974	meiotic DNA replication initiation	1	1	1	1	0.0701585	1	1	IME4_YEAST
biological_process	GO:1900186	negative regulation of clathrin-dependent endocytosis	1	2	0.5	0.99509	0.135407	1	1	AKL1_YEAST
biological_process	GO:0022618	ribonucleoprotein complex assembly	1	2	0.5	0.0366166	0.984736	0.998	1	THO1_YEAST
biological_process	GO:0071244	cellular response to carbon dioxide	1	2	0.5	0.99509	0.135407	1	1	ACA2_YEAST
biological_process	GO:0061429	positive regulation of transcription from RNA polymerase II promoter by oleic acid	1	4	0.25	0.973212	0.252523	1	1	ACA2_YEAST
biological_process	GO:0070979	protein K11-linked ubiquitination	1	4	0.25	0.973212	0.252523	1	1	APC1_YEAST
biological_process	GO:0006883	cellular sodium ion homeostasis	1	3	0.333333	0.985957	0.196089	1	1	PPZ1_YEAST
biological_process	GO:0006376	mRNA splice site selection	1	3	0.333333	0.822251	0.5511	1	1	NAM8_YEAST
biological_process	GO:0031921	pyridoxal phosphate transport	1	1	1	1	0.0701585	1	1	MTM1_YEAST
biological_process	GO:0006798	polyphosphate catabolic process	1	4	0.25	0.973212	0.252523	1	1	PPN1_YEAST
biological_process	GO:0048313	Golgi inheritance	1	4	0.25	0.973212	0.252523	1	1	YPT11_YEAST
biological_process	GO:0051645	Golgi localization	1	2	0.5	0.99509	0.135407	1	1	YPT11_YEAST
biological_process	GO:0045128	negative regulation of reciprocal meiotic recombination	1	3	0.333333	0.985957	0.196089	1	1	ZIP1_YEAST
biological_process	GO:0016479	negative regulation of transcription by RNA polymerase I	1	7	0.142857	0.872596	0.48066	1	1	SIN3_YEAST
biological_process	GO:0051038	negative regulation of transcription involved in meiotic cell cycle	1	3	0.333333	0.99031	0.0814835	1	1	SIN3_YEAST
biological_process	GO:0001522	pseudouridine synthesis	1	3	0.333333	0.636568	0.730605	1	1	NAF1_YEAST
biological_process	GO:0010827	regulation of glucose transmembrane transport	1	1	1	0.994161	0.060971	1	1	SKS1_YEAST
biological_process	GO:0016578	histone deubiquitination	1	7	0.142857	0.918516	0.399201	1	1	SGF73_YEAST
biological_process	GO:1905634	regulation of protein localization to chromatin	1	2	0.5	0.973212	0.252523	1	1	SGF73_YEAST
biological_process	GO:1904802	RITS complex assembly	1	1	1	1	0.0701585	1	1	SGF73_YEAST
biological_process	GO:1902413	negative regulation of mitotic cytokinesis	1	2	0.5	0.985957	0.196089	1	1	SKG6_YEAST
biological_process	GO:0000493	box H/ACA snoRNP assembly	1	3	0.333333	0.985957	0.196089	1	1	NAF1_YEAST
biological_process	GO:0044648	histone H3-K4 dimethylation	1	1	1	1	0.0701585	1	1	SET1_YEAST
biological_process	GO:0097692	histone H3-K4 monomethylation	1	1	1	1	0.0701585	1	1	SET1_YEAST
biological_process	GO:0090241	negative regulation of histone H4 acetylation	1	1	1	1	0.0701585	1	1	SET1_YEAST
biological_process	GO:1905088	positive regulation of synaptonemal complex assembly	1	1	1	1	0.0701585	1	1	SET1_YEAST
biological_process	GO:0061158	3'-UTR-mediated mRNA destabilization	1	1	1	1	0.0701585	1	1	NGR1_YEAST
biological_process	GO:1900101	regulation of endoplasmic reticulum unfolded protein response	1	6	0.166667	0.98643	0.0699231	1	1	SKN7_YEAST
biological_process	GO:0098656	anion transmembrane transport	1	3	0.333333	0.236557	0.912254	1	1	PHO91_YEAST
biological_process	GO:2000185	regulation of phosphate transmembrane transport	1	4	0.25	0.973212	0.252523	1	1	PHO91_YEAST
biological_process	GO:0043968	histone H2A acetylation	1	4	0.25	0.973212	0.252523	1	1	SWC4_YEAST
biological_process	GO:0007074	positive regulation of transcription involved in exit from mitosis, from RNA polymerase II promoter	1	1	1	1	0.0701585	1	1	SWI5_YEAST
biological_process	GO:0010845	positive regulation of reciprocal meiotic recombination	1	1	1	1	0.0701585	1	1	SWI6_YEAST
biological_process	GO:0043388	positive regulation of DNA binding	1	2	0.5	0.957406	0.305006	1	1	PHO2_YEAST
biological_process	GO:0043408	regulation of MAPK cascade	1	3	0.333333	0.71595	0.664674	1	1	CLA4_YEAST
biological_process	GO:0000304	response to singlet oxygen	1	3	0.333333	0.985957	0.196089	1	1	SKN7_YEAST
biological_process	GO:0033235	positive regulation of protein sumoylation	1	5	0.2	0.957406	0.305006	1	1	ZIP1_YEAST
biological_process	GO:0006675	mannosyl-inositol phosphorylceramide metabolic process	1	2	0.5	0.985957	0.196089	1	1	TLG2_YEAST
biological_process	GO:0035493	SNARE complex assembly	1	6	0.166667	0.71595	0.664674	1	1	SEC9_YEAST
biological_process	GO:0010673	positive regulation of transcription from RNA polymerase II promoter involved in meiotic cell cycle	1	2	0.5	0.99509	0.135407	1	1	UME6_YEAST
biological_process	GO:0032012	regulation of ARF protein signal transduction	1	5	0.2	0.994161	0.060971	1	1	SEC7_YEAST
biological_process	GO:0001197	positive regulation of mating-type specific transcription from RNA polymerase II promoter	1	2	0.5	0.99509	0.135407	1	1	MCM1_YEAST
biological_process	GO:0080144	amino acid homeostasis	1	1	1	1	0.0701585	1	1	MSN2_YEAST
biological_process	GO:0061422	positive regulation of transcription from RNA polymerase II promoter in response to alkaline pH	1	1	1	1	0.0701585	1	1	MSN2_YEAST
biological_process	GO:0061411	positive regulation of transcription from RNA polymerase II promoter in response to cold	1	1	1	1	0.0701585	1	1	MSN2_YEAST
biological_process	GO:0061410	positive regulation of transcription from RNA polymerase II promoter in response to ethanol	1	3	0.333333	0.985957	0.196089	1	1	MSN2_YEAST
biological_process	GO:0061409	positive regulation of transcription from RNA polymerase II promoter in response to freezing	1	1	1	1	0.0701585	1	1	MSN2_YEAST
biological_process	GO:0061407	positive regulation of transcription from RNA polymerase II promoter in response to hydrogen peroxide	1	1	1	1	0.0701585	1	1	MSN2_YEAST
biological_process	GO:0061405	positive regulation of transcription from RNA polymerase II promoter in response to hydrostatic pressure	1	1	1	1	0.0701585	1	1	MSN2_YEAST
biological_process	GO:0061403	positive regulation of transcription from RNA polymerase II promoter in response to nitrosative stress	1	1	1	1	0.0701585	1	1	MSN2_YEAST
biological_process	GO:0035404	histone-serine phosphorylation	1	2	0.5	0.99509	0.135407	1	1	CLA4_YEAST
biological_process	GO:0015794	glycerol-3-phosphate transmembrane transport	1	2	0.5	0.99509	0.135407	1	1	PHO91_YEAST
biological_process	GO:0000019	regulation of mitotic recombination	1	4	0.25	0.918516	0.399201	1	1	RAD25_YEAST
biological_process	GO:0031648	protein destabilization	1	1	1	1	0.0701585	1	1	SSN3_YEAST
biological_process	GO:0032197	transposition, RNA-mediated	1	92	0.0108696	0.0164396	0.996454	0.929	1	YH41A_YEAST
biological_process	GO:0071255	Cvt vesicle assembly	1	3	0.333333	0.985957	0.196089	1	1	ATG13_YEAST
biological_process	GO:0006799	polyphosphate biosynthetic process	1	5	0.2	0.957406	0.305006	1	1	YD089_YEAST
biological_process	GO:1990573	potassium ion import across plasma membrane	1	4	0.25	0.973212	0.252523	1	1	TRK1_YEAST
biological_process	GO:0010995	free ubiquitin chain depolymerization	1	3	0.333333	0.985957	0.196089	1	1	UBP4_YEAST
biological_process	GO:0010992	ubiquitin recycling	1	5	0.2	0.796073	0.582661	1	1	UBP4_YEAST
biological_process	GO:0010044	response to aluminum ion	1	1	1	1	0.0701585	1	1	URE2_YEAST
biological_process	GO:0032147	activation of protein kinase activity	1	4	0.25	0.973212	0.252523	1	1	ATG13_YEAST
biological_process	GO:0090364	regulation of proteasome assembly	1	1	1	0.99509	0.135407	1	1	SLT2_YEAST
biological_process	GO:0042306	regulation of protein import into nucleus	1	1	1	0.996921	0.0425936	1	1	SLT2_YEAST
biological_process	GO:0006464	cellular protein modification process	1	4	0.25	0.989842	0.0146316	1	1	STP22_YEAST
biological_process	GO:0030154	cell differentiation	1	3	0.333333	0.981855	0.0327023	1	1	PHO2_YEAST
biological_process	GO:0045937	positive regulation of phosphate metabolic process	1	2	0.5	0.928469	0.150265	1	1	PHO2_YEAST
biological_process	GO:0120213	regulation of histidine biosynthetic process	1	1	1	1	0.0701585	1	1	PHO2_YEAST
biological_process	GO:0006141	regulation of purine nucleobase metabolic process	1	1	1	1	0.0701585	1	1	PHO2_YEAST
biological_process	GO:1902915	negative regulation of protein polyubiquitination	1	1	1	1	0.0701585	1	1	STP22_YEAST
biological_process	GO:0010971	positive regulation of G2/M transition of mitotic cell cycle	1	4	0.25	0.973212	0.252523	1	1	ZDS1_YEAST
biological_process	GO:0006448	regulation of translational elongation	1	3	0.333333	0.97269	0.112049	1	1	TRM9_YEAST
biological_process	GO:0030643	cellular phosphate ion homeostasis	1	1	1	1	0.0701585	1	1	YD089_YEAST
biological_process	GO:0033674	positive regulation of kinase activity	1	3	0.333333	0.957376	0.129119	1	1	VAC7_YEAST
biological_process	GO:0051469	vesicle fusion with vacuole	1	2	0.5	0.99509	0.135407	1	1	VAM3_YEAST
biological_process	GO:0071554	cell wall organization or biogenesis	1	1	1	0.441607	0.648961	1	1	WHI3_YEAST
biological_process	GO:0045793	positive regulation of cell size	1	1	1	1	0.0701585	1	1	WHI3_YEAST
biological_process	GO:1990166	protein localization to site of double-strand break	1	2	0.5	0.99509	0.135407	1	1	ZIP1_YEAST
biological_process	GO:1901799	negative regulation of proteasomal protein catabolic process	1	1	1	0.985957	0.196089	1	1	UBP6_YEAST
biological_process	GO:0032434	regulation of proteasomal ubiquitin-dependent protein catabolic process	1	1	1	0.979072	0.127404	1	1	UBP6_YEAST
biological_process	GO:1900192	positive regulation of single-species biofilm formation	1	1	1	1	0.0701585	1	1	TUP1_YEAST
biological_process	GO:0000423	mitophagy	1	5	0.2	0.769514	0.612009	1	1	ATG13_YEAST
biological_process	GO:0001081	nitrogen catabolite repression of transcription from RNA polymerase II promoter	1	1	1	1	0.0701585	1	1	UME6_YEAST
biological_process	GO:0009847	spore germination	1	1	1	1	0.0701585	1	1	UME6_YEAST
biological_process	GO:0072417	response to spindle checkpoint signaling	1	1	1	0.996921	0.0425936	1	1	NUP53_YEAST
biological_process	GO:0030837	negative regulation of actin filament polymerization	1	3	0.333333	0.992495	0.0468633	1	1	AIM21_YEAST
biological_process	GO:2000813	negative regulation of barbed-end actin filament capping	1	2	0.5	0.99509	0.135407	1	1	AIM21_YEAST
biological_process	GO:0035303	regulation of dephosphorylation	1	1	1	0.905156	0.22813	1	1	TAP42_YEAST
biological_process	GO:0071108	protein K48-linked deubiquitination	1	2	0.5	0.99509	0.135407	1	1	YP191_YEAST
biological_process	GO:0043504	mitochondrial DNA repair	1	4	0.25	0.973212	0.252523	1	1	RAD52_YEAST
biological_process	GO:0006277	DNA amplification	1	5	0.2	0.918516	0.399201	1	1	RAD52_YEAST
biological_process	GO:0033683	nucleotide-excision repair, DNA incision	1	3	0.333333	0.896257	0.441409	1	1	RAD25_YEAST
biological_process	GO:0006033	chitin localization	1	1	1	1	0.0701585	1	1	RCR1_YEAST
biological_process	GO:1990115	RNA polymerase III assembly	1	2	0.5	0.99509	0.135407	1	1	RBS1_YEAST
biological_process	GO:1904877	positive regulation of DNA ligase activity	1	1	1	1	0.0701585	1	1	RAD52_YEAST
biological_process	GO:0009202	deoxyribonucleoside triphosphate biosynthetic process	1	1	1	0.985957	0.196089	1	1	RAD53_YEAST
biological_process	GO:0042326	negative regulation of phosphorylation	1	2	0.5	0.636568	0.730605	1	1	RAD53_YEAST
biological_process	GO:0090372	positive regulation of glycerol transport	1	2	0.5	0.99509	0.135407	1	1	ASK10_YEAST
biological_process	GO:1901900	regulation of protein localization to cell division site	1	4	0.25	0.918516	0.399201	1	1	DBF2_YEAST
biological_process	GO:1900240	negative regulation of phenotypic switching	1	1	1	1	0.0701585	1	1	DIG1_YEAST
biological_process	GO:0071322	cellular response to carbohydrate stimulus	1	1	1	0.998051	0.0135698	1	1	AZF1_YEAST
biological_process	GO:0001881	receptor recycling	1	2	0.5	0.896257	0.441409	1	1	BOI2_YEAST
biological_process	GO:1902404	mitotic actomyosin contractile ring contraction	1	2	0.5	0.957406	0.305006	1	1	MYO1_YEAST
biological_process	GO:1904498	protein localization to mitotic actomyosin contractile ring	1	1	1	1	0.0701585	1	1	MYO1_YEAST
biological_process	GO:0035825	homologous recombination	1	1	1	0.411096	0.763878	1	1	NEJ1_YEAST
biological_process	GO:0034638	phosphatidylcholine catabolic process	1	1	1	1	0.0701585	1	1	NTE1_YEAST
biological_process	GO:0016458	obsolete gene silencing	1	1	1	0.906272	0.254313	1	1	NU170_YEAST
biological_process	GO:0061428	negative regulation of transcription from RNA polymerase II promoter in response to hypoxia	1	1	1	1	0.0701585	1	1	HAP1_YEAST
biological_process	GO:0006038	cell wall chitin biosynthetic process	1	1	1	0.97269	0.112049	1	1	CRZ1_YEAST
biological_process	GO:0050801	ion homeostasis	1	2	0.5	0.583795	0.532299	1	1	CRZ1_YEAST
biological_process	GO:0045900	negative regulation of translational elongation	1	1	1	0.985957	0.196089	1	1	DHH1_YEAST
biological_process	GO:0033047	regulation of mitotic sister chromatid segregation	1	1	1	0.62773	0.650664	1	1	CIN8_YEAST
biological_process	GO:0006523	alanine biosynthetic process	1	1	1	1	0.0701585	1	1	ALAM_YEAST
biological_process	GO:0006524	alanine catabolic process	1	1	1	0.99509	0.135407	1	1	ALAM_YEAST
biological_process	GO:0042853	L-alanine catabolic process	1	2	0.5	0.99509	0.135407	1	1	ALAM_YEAST
biological_process	GO:0034642	mitochondrion migration along actin filament	1	1	1	1	0.0701585	1	1	AIM21_YEAST
biological_process	GO:0015986	ATP synthesis coupled proton transport	0	18	0	0.186981	1	1	1
biological_process	GO:0010390	histone monoubiquitination	0	2	0	0.864593	1	1	1
biological_process	GO:0016574	histone ubiquitination	0	7	0	0.289793	1	1	1
biological_process	GO:0031571	mitotic G1 DNA damage checkpoint signaling	0	5	0	0.694994	1	1	1
biological_process	GO:0031573	mitotic intra-S DNA damage checkpoint signaling	0	13	0	0.387991	1	1	1
biological_process	GO:0070534	protein K63-linked ubiquitination	0	5	0	0.694994	1	1	1
biological_process	GO:0006353	DNA-templated transcription, termination	0	10	0	0.720949	0.455967	1	1
biological_process	GO:0032786	positive regulation of DNA-templated transcription, elongation	0	5	0	0.961715	0.0827791	1	1
biological_process	GO:0051571	positive regulation of histone H3-K4 methylation	0	2	0	0.864593	1	1	1
biological_process	GO:0033184	positive regulation of histone ubiquitination	0	1	0	0.864593	1	1	1
biological_process	GO:0007094	mitotic spindle assembly checkpoint signaling	0	24	0	0.367297	0.887927	1	1
biological_process	GO:0033108	mitochondrial respiratory chain complex assembly	0	8	0	0.30796	0.875574	1	1
biological_process	GO:0006627	protein processing involved in protein targeting to mitochondrion	0	6	0	0.646187	1	1	1
biological_process	GO:0006796	phosphate-containing compound metabolic process	0	6	0	0.841313	0.198603	1	1
biological_process	GO:0000447	endonucleolytic cleavage in ITS1 to separate SSU-rRNA from 5.8S rRNA and LSU-rRNA from tricistronic rRNA transcript (SSU-rRNA, 5.8S rRNA, LSU-rRNA)	0	44	0	0.040176	1	1	1
biological_process	GO:0006665	sphingolipid metabolic process	0	9	0	0.29503	0.882538	1	1
biological_process	GO:0046512	sphingosine biosynthetic process	0	4	0	0.747477	1	1	1
biological_process	GO:0051444	negative regulation of ubiquitin-protein transferase activity	0	1	0	0.994161	0.060971	1	1
biological_process	GO:0046513	ceramide biosynthetic process	0	9	0	0.4489	1	1	1
biological_process	GO:0140042	lipid droplet formation	0	5	0	0.694994	1	1	1
biological_process	GO:0090155	negative regulation of sphingolipid biosynthetic process	0	5	0	0.694994	1	1	1
biological_process	GO:1990044	protein localization to lipid droplet	0	2	0	0.864593	1	1	1
biological_process	GO:0009086	methionine biosynthetic process	0	23	0	0.089978	1	1	1
biological_process	GO:0032259	methylation	0	20	0	0.123004	0.94272	1	1
biological_process	GO:0000096	sulfur amino acid metabolic process	0	5	0	0.0240284	1	0.983	1
biological_process	GO:0061621	canonical glycolysis	0	2	0	0.864593	1	1	1
biological_process	GO:0030388	fructose 1,6-bisphosphate metabolic process	0	3	0	0.803911	1	1	1
biological_process	GO:0006002	fructose 6-phosphate metabolic process	0	6	0	0.646187	1	1	1
biological_process	GO:0006096	glycolytic process	0	26	0	0.120581	1	1	1
biological_process	GO:0051453	regulation of intracellular pH	0	6	0	0.315516	0.910022	1	1
biological_process	GO:0030026	cellular manganese ion homeostasis	0	11	0	0.4489	1	1	1
biological_process	GO:0006506	GPI anchor biosynthetic process	0	26	0	0.349336	0.895835	1	1
biological_process	GO:0045490	pectin catabolic process	0	1	0	0.929842	1	1	1
biological_process	GO:0070262	peptidyl-serine dephosphorylation	0	9	0	0.51934	1	1	1
biological_process	GO:1904184	positive regulation of pyruvate dehydrogenase activity	0	2	0	0.864593	1	1	1
biological_process	GO:1901524	regulation of mitophagy	0	4	0	0.558591	1	1	1
biological_process	GO:0019388	galactose catabolic process	0	3	0	0.558591	1	1	1
biological_process	GO:0019255	glucose 1-phosphate metabolic process	0	2	0	0.864593	1	1	1
biological_process	GO:0051156	glucose 6-phosphate metabolic process	0	8	0	0.216398	1	1	1
biological_process	GO:0005978	glycogen biosynthetic process	0	13	0	0.512959	0.813019	1	1
biological_process	GO:0006011	UDP-glucose metabolic process	0	4	0	0.747477	1	1	1
biological_process	GO:0046115	guanosine catabolic process	0	2	0	0.864593	1	1	1
biological_process	GO:0006148	inosine catabolic process	0	2	0	0.864593	1	1	1
biological_process	GO:0006166	purine ribonucleoside salvage	0	6	0	0.600799	1	1	1
biological_process	GO:1990414	replication-born double-strand break repair via sister chromatid exchange	0	14	0	0.360701	1	1	1
biological_process	GO:0015849	organic acid transport	0	1	0	0.0147413	0.998042	0.914	1
biological_process	GO:0009410	response to xenobiotic stimulus	0	21	0	0.385969	0.879419	1	1
biological_process	GO:0043942	negative regulation of sexual sporulation resulting in formation of a cellular spore	0	1	0	0.985957	0.196089	1	1
biological_process	GO:0015914	phospholipid transport	0	22	0	0.217805	0.946125	1	1
biological_process	GO:0016126	sterol biosynthetic process	0	17	0	0.477664	0.770073	1	1
biological_process	GO:0043001	Golgi to plasma membrane protein transport	0	12	0	0.387991	1	1	1
biological_process	GO:1901352	negative regulation of phosphatidylglycerol biosynthetic process	0	3	0	0.803911	1	1	1
biological_process	GO:0006658	phosphatidylserine metabolic process	0	2	0	0.694994	1	1	1
biological_process	GO:2001247	positive regulation of phosphatidylcholine biosynthetic process	0	3	0	0.803911	1	1	1
biological_process	GO:0009094	L-phenylalanine biosynthetic process	0	4	0	0.747477	1	1	1
biological_process	GO:0071409	cellular response to cycloheximide	0	2	0	0.864593	1	1	1
biological_process	GO:0060548	negative regulation of cell death	0	5	0	0.98975	0.0578474	1	1
biological_process	GO:0046898	response to cycloheximide	0	3	0	0.694994	1	1	1
biological_process	GO:0042631	cellular response to water deprivation	0	3	0	0.646187	1	1	1
biological_process	GO:0031384	regulation of initiation of mating projection growth	0	4	0	0.747477	1	1	1
biological_process	GO:0031385	regulation of termination of mating projection growth	0	4	0	0.747477	1	1	1
biological_process	GO:0007007	inner mitochondrial membrane organization	0	5	0	0.647386	0.632703	1	1
biological_process	GO:0070584	mitochondrion morphogenesis	0	2	0	0.864593	1	1	1
biological_process	GO:0045861	negative regulation of proteolysis	0	2	0	0.896257	0.441409	1	1
biological_process	GO:0006895	Golgi to endosome transport	0	25	0	0.120581	1	1	1
biological_process	GO:0048284	organelle fusion	0	2	0	0.937494	0.116406	1	1
biological_process	GO:0035542	regulation of SNARE complex assembly	0	6	0	0.51934	1	1	1
biological_process	GO:0032889	regulation of vacuole fusion, non-autophagic	0	14	0	0.360701	1	1	1
biological_process	GO:0007033	vacuole organization	0	16	0	0.912855	0.153609	1	1
biological_process	GO:0006904	vesicle docking involved in exocytosis	0	9	0	0.769514	0.612009	1	1
biological_process	GO:0099022	vesicle tethering	0	8	0	0.689242	0.688268	1	1
biological_process	GO:0046475	glycerophospholipid catabolic process	0	6	0	0.896257	0.441409	1	1
biological_process	GO:0034478	phosphatidylglycerol catabolic process	0	1	0	0.929842	1	1	1
biological_process	GO:0036205	histone catabolic process	0	5	0	0.694994	1	1	1
biological_process	GO:0006657	CDP-choline pathway	0	2	0	0.864593	1	1	1
biological_process	GO:0009443	pyridoxal 5'-phosphate salvage	0	3	0	0.803911	1	1	1
biological_process	GO:0008615	pyridoxine biosynthetic process	0	6	0	0.646187	1	1	1
biological_process	GO:0006198	cAMP catabolic process	0	1	0	0.929842	1	1	1
biological_process	GO:0046069	cGMP catabolic process	0	1	0	0.929842	1	1	1
biological_process	GO:1902660	negative regulation of glucose mediated signaling pathway	0	4	0	0.747477	1	1	1
biological_process	GO:0051302	regulation of cell division	0	2	0	0.922428	0.197966	1	1
biological_process	GO:0032878	regulation of establishment or maintenance of cell polarity	0	4	0	0.600799	1	1	1
biological_process	GO:0019933	cAMP-mediated signaling	0	2	0	0.864593	1	1	1
biological_process	GO:0043433	negative regulation of DNA-binding transcription factor activity	0	7	0	0.872596	0.48066	1	1
biological_process	GO:0016242	negative regulation of macroautophagy	0	8	0	0.417339	1	1	1
biological_process	GO:0031647	regulation of protein stability	0	5	0	0.446289	0.849836	1	1
biological_process	GO:0005979	regulation of glycogen biosynthetic process	0	7	0	0.796073	0.582661	1	1
biological_process	GO:0005981	regulation of glycogen catabolic process	0	2	0	0.747477	1	1	1
biological_process	GO:0006672	ceramide metabolic process	0	4	0	0.387991	1	1	1
biological_process	GO:0006629	lipid metabolic process	0	12	0	0.00501869	0.997701	0.53	1
biological_process	GO:0019915	lipid storage	0	5	0	0.51934	1	1	1
biological_process	GO:0055091	phospholipid homeostasis	0	3	0	0.803911	1	1	1
biological_process	GO:0019432	triglyceride biosynthetic process	0	3	0	0.694994	1	1	1
biological_process	GO:0000949	aromatic amino acid family catabolic process to alcohol via Ehrlich pathway	0	4	0	0.747477	1	1	1
biological_process	GO:0009083	branched-chain amino acid catabolic process	0	7	0	0.482841	1	1	1
biological_process	GO:0019655	glycolytic fermentation to ethanol	0	4	0	0.600799	1	1	1
biological_process	GO:0006559	L-phenylalanine catabolic process	0	5	0	0.694994	1	1	1
biological_process	GO:0006090	pyruvate metabolic process	0	10	0	0.0500662	1	1	1
biological_process	GO:0045069	regulation of viral genome replication	0	2	0	0.864593	1	1	1
biological_process	GO:0006569	tryptophan catabolic process	0	7	0	0.482841	1	1	1
biological_process	GO:2001172	positive regulation of glycolytic fermentation to ethanol	0	1	0	0.929842	1	1	1
biological_process	GO:0090180	positive regulation of thiamine biosynthetic process	0	3	0	0.803911	1	1	1
biological_process	GO:0006067	ethanol metabolic process	0	4	0	0.482841	1	1	1
biological_process	GO:0006273	lagging strand elongation	0	9	0	0.4489	1	1	1
biological_process	GO:0006272	leading strand elongation	0	12	0	0.417339	1	1	1
biological_process	GO:0035753	maintenance of DNA trinucleotide repeats	0	11	0	0.4489	1	1	1
biological_process	GO:0000710	meiotic mismatch repair	0	11	0	0.4489	1	1	1
biological_process	GO:0006298	mismatch repair	0	20	0	0.173804	1	1	1
biological_process	GO:0045739	positive regulation of DNA repair	0	1	0	0.600799	1	1	1
biological_process	GO:0045740	positive regulation of DNA replication	0	4	0	0.930077	0.257247	1	1
biological_process	GO:1902394	positive regulation of exodeoxyribonuclease activity	0	1	0	0.929842	1	1	1
biological_process	GO:1905779	positive regulation of exonuclease activity	0	2	0	0.803911	1	1	1
biological_process	GO:1903022	positive regulation of phosphodiesterase activity, acting on 3'-phosphoglycolate-terminated DNA strands	0	1	0	0.929842	1	1	1
biological_process	GO:0019985	translesion synthesis	0	3	0	0.636568	0.730605	1	1
biological_process	GO:0006812	cation transport	0	7	0	0.00910198	0.996748	0.734	1
biological_process	GO:0042391	regulation of membrane potential	0	2	0	0.694994	1	1	1
biological_process	GO:0006637	acyl-CoA metabolic process	0	1	0	0.536523	0.798846	1	1
biological_process	GO:0006635	fatty acid beta-oxidation	0	13	0	0.311732	1	1	1
biological_process	GO:0009062	fatty acid catabolic process	0	3	0	0.161554	1	1	1
biological_process	GO:0019395	fatty acid oxidation	0	2	0	0.250429	1	1	1
biological_process	GO:0001561	fatty acid alpha-oxidation	0	2	0	0.864593	1	1	1
biological_process	GO:1903501	positive regulation of mitotic actomyosin contractile ring assembly	0	6	0	0.646187	1	1	1
biological_process	GO:1901901	regulation of protein localization to cell division site involved in cytokinesis	0	2	0	0.864593	1	1	1
biological_process	GO:0000002	mitochondrial genome maintenance	0	41	0	0.139504	0.970047	1	1
biological_process	GO:0097745	mitochondrial tRNA 5'-end processing	0	5	0	0.694994	1	1	1
biological_process	GO:0035494	SNARE complex disassembly	0	3	0	0.803911	1	1	1
biological_process	GO:0048280	vesicle fusion with Golgi apparatus	0	10	0	0.822251	0.5511	1	1
biological_process	GO:0006564	L-serine biosynthetic process	0	5	0	0.694994	1	1	1
biological_process	GO:0009070	serine family amino acid biosynthetic process	0	3	0	0.467821	0.838446	1	1
biological_process	GO:0030490	maturation of SSU-rRNA	0	20	0	0.00974802	0.998045	0.783	1
biological_process	GO:1905216	positive regulation of RNA binding	0	2	0	0.803911	1	1	1
biological_process	GO:0000452	snoRNA guided rRNA 2'-O-methylation	0	4	0	0.747477	1	1	1
biological_process	GO:0009113	purine nucleobase biosynthetic process	0	4	0	0.482841	1	1	1
biological_process	GO:0009051	pentose-phosphate shunt, oxidative branch	0	7	0	0.600799	1	1	1
biological_process	GO:0000349	generation of catalytic spliceosome for first transesterification step	0	9	0	0.51934	1	1	1
biological_process	GO:0000244	spliceosomal tri-snRNP complex assembly	0	6	0	0.646187	1	1	1
biological_process	GO:0000388	spliceosome conformational change to release U4 (or U4atac) and U1 (or U11)	0	3	0	0.803911	1	1	1
biological_process	GO:0051083	'de novo' cotranslational protein folding	0	5	0	0.694994	1	1	1
biological_process	GO:0042149	cellular response to glucose starvation	0	13	0	0.872186	0.363432	1	1
biological_process	GO:0034620	cellular response to unfolded protein	0	11	0	0.98655	0.0393832	1	1
biological_process	GO:0006450	regulation of translational fidelity	0	13	0	0.201154	1	1	1
biological_process	GO:0006452	translational frameshifting	0	6	0	0.558591	1	1	1
biological_process	GO:0009263	deoxyribonucleotide biosynthetic process	0	6	0	0.482841	1	1	1
biological_process	GO:0006662	glycerol ether metabolic process	0	2	0	0.864593	1	1	1
biological_process	GO:0080058	protein deglutathionylation	0	2	0	0.864593	1	1	1
biological_process	GO:0043085	positive regulation of catalytic activity	0	4	0	0.964524	0.0701358	1	1
biological_process	GO:0071266	'de novo' L-methionine biosynthetic process	0	1	0	0.929842	1	1	1
biological_process	GO:0019343	cysteine biosynthetic process via cystathionine	0	3	0	0.803911	1	1	1
biological_process	GO:0019346	transsulfuration	0	10	0	0.482841	1	1	1
biological_process	GO:0071590	nicotinamide riboside biosynthetic process	0	2	0	0.864593	1	1	1
biological_process	GO:0071592	nicotinic acid riboside biosynthetic process	0	2	0	0.864593	1	1	1
biological_process	GO:0007329	positive regulation of transcription from RNA polymerase II promoter by pheromones	0	6	0	0.646187	1	1	1
biological_process	GO:2000220	regulation of pseudohyphal growth	0	6	0	0.993542	0.0273483	1	1
biological_process	GO:0019953	sexual reproduction	0	1	0	0.873725	0.184968	1	1
biological_process	GO:0035405	histone-threonine phosphorylation	0	1	0	0.929842	1	1	1
biological_process	GO:0000161	osmosensory signaling MAPK cascade	0	5	0	0.694994	1	1	1
biological_process	GO:0071507	pheromone response MAPK cascade	0	3	0	0.803911	1	1	1
biological_process	GO:0060172	astral microtubule depolymerization	0	1	0	0.929842	1	1	1
biological_process	GO:0008608	attachment of spindle microtubules to kinetochore	0	14	0	0.550652	0.715578	1	1
biological_process	GO:0000226	microtubule cytoskeleton organization	0	13	0	0.119861	0.948949	1	1
biological_process	GO:0032120	ascospore-type prospore membrane formation	0	14	0	0.610789	0.749571	1	1
biological_process	GO:0015802	basic amino acid transport	0	7	0	0.360701	1	1	1
biological_process	GO:0070183	mitochondrial tryptophanyl-tRNA aminoacylation	0	1	0	0.929842	1	1	1
biological_process	GO:0006436	tryptophanyl-tRNA aminoacylation	0	2	0	0.864593	1	1	1
biological_process	GO:0070588	calcium ion transmembrane transport	0	7	0	0.51934	1	1	1
biological_process	GO:0051027	DNA transport	0	2	0	0.864593	1	1	1
biological_process	GO:0006811	ion transport	0	8	0	0.0191676	0.990487	0.955	1
biological_process	GO:0046034	ATP metabolic process	0	3	0	0.00560823	0.999356	0.569	1
biological_process	GO:1902906	proteasome storage granule assembly	0	4	0	0.747477	1	1	1
biological_process	GO:0000480	endonucleolytic cleavage in 5'-ETS of tricistronic rRNA transcript (SSU-rRNA, 5.8S rRNA, LSU-rRNA)	0	33	0	0.089978	1	1	1
biological_process	GO:0000472	endonucleolytic cleavage to generate mature 5'-end of SSU-rRNA from (SSU-rRNA, 5.8S rRNA, LSU-rRNA)	0	34	0	0.0836247	1	1	1
biological_process	GO:0034227	tRNA thio-modification	0	5	0	0.600799	1	1	1
biological_process	GO:0002143	tRNA wobble position uridine thiolation	0	6	0	0.646187	1	1	1
biological_process	GO:0019674	NAD metabolic process	0	4	0	0.289793	1	1	1
biological_process	GO:0006741	NADP biosynthetic process	0	3	0	0.803911	1	1	1
biological_process	GO:0019408	dolichol biosynthetic process	0	4	0	0.694994	1	1	1
biological_process	GO:0007618	mating	0	2	0	0.864593	1	1	1
biological_process	GO:0006875	cellular metal ion homeostasis	0	6	0	0.551988	0.593441	1	1
biological_process	GO:0006813	potassium ion transport	0	6	0	0.71595	0.664674	1	1
biological_process	GO:0032979	protein insertion into mitochondrial inner membrane from matrix	0	9	0	0.51934	1	1	1
biological_process	GO:0033316	meiotic spindle assembly checkpoint signaling	0	1	0	0.929842	1	1	1
biological_process	GO:0051988	regulation of attachment of spindle microtubules to kinetochore	0	1	0	0.417339	1	1	1
biological_process	GO:0031134	sister chromatid biorientation	0	8	0	0.250429	1	1	1
biological_process	GO:0051225	spindle assembly	0	5	0	0.536523	0.798846	1	1
biological_process	GO:1904659	glucose transmembrane transport	0	7	0	0.902905	0.310758	1	1
biological_process	GO:0019509	L-methionine salvage from methylthioadenosine	0	9	0	0.51934	1	1	1
biological_process	GO:0006555	methionine metabolic process	0	4	0	0.0671262	1	1	1
biological_process	GO:0034462	small-subunit processome assembly	0	2	0	0.864593	1	1	1
biological_process	GO:0000373	Group II intron splicing	0	1	0	0.929842	1	1	1
biological_process	GO:0000963	mitochondrial RNA processing	0	3	0	0.467821	0.838446	1	1
biological_process	GO:0034337	RNA folding	0	2	0	0.864593	1	1	1
biological_process	GO:0006392	transcription elongation from mitochondrial promoter	0	1	0	0.929842	1	1	1
biological_process	GO:0009435	NAD biosynthetic process	0	6	0	0.360701	1	1	1
biological_process	GO:0000737	DNA catabolic process, endonucleolytic	0	2	0	0.747477	1	1	1
biological_process	GO:0006265	DNA topological change	0	12	0	0.417339	1	1	1
biological_process	GO:0051097	negative regulation of helicase activity	0	1	0	0.803911	1	1	1
biological_process	GO:0000712	resolution of meiotic recombination intermediates	0	9	0	0.51934	1	1	1
biological_process	GO:0000395	mRNA 5'-splice site recognition	0	6	0	0.646187	1	1	1
biological_process	GO:0044154	histone H3-K14 acetylation	0	4	0	0.646187	1	1	1
biological_process	GO:0000754	adaptation of signaling pathway by response to pheromone involved in conjugation with cellular fusion	0	14	0	0.926882	0.216051	1	1
biological_process	GO:0097720	calcineurin-mediated signaling	0	2	0	0.864593	1	1	1
biological_process	GO:0043007	maintenance of rDNA	0	10	0	0.482841	1	1	1
biological_process	GO:0006207	'de novo' pyrimidine nucleobase biosynthetic process	0	9	0	0.51934	1	1	1
biological_process	GO:0044205	'de novo' UMP biosynthetic process	0	6	0	0.646187	1	1	1
biological_process	GO:0019240	citrulline biosynthetic process	0	3	0	0.803911	1	1	1
biological_process	GO:0045984	negative regulation of pyrimidine nucleobase metabolic process	0	1	0	0.929842	1	1	1
biological_process	GO:0006228	UTP biosynthetic process	0	3	0	0.803911	1	1	1
biological_process	GO:0007023	post-chaperonin tubulin folding pathway	0	5	0	0.694994	1	1	1
biological_process	GO:0007031	peroxisome organization	0	19	0	0.671978	0.530868	1	1
biological_process	GO:0061415	negative regulation of transcription from RNA polymerase II promoter by a nonfermentable carbon source	0	2	0	0.864593	1	1	1
biological_process	GO:0000245	spliceosomal complex assembly	0	14	0	0.425466	0.860424	1	1
biological_process	GO:0051177	meiotic sister chromatid cohesion	0	3	0	0.4489	1	1	1
biological_process	GO:1905339	positive regulation of cohesin unloading	0	3	0	0.803911	1	1	1
biological_process	GO:0071459	protein localization to chromosome, centromeric region	0	7	0	0.96017	0.14431	1	1
biological_process	GO:0015976	carbon utilization	0	5	0	0.694994	1	1	1
biological_process	GO:1904183	negative regulation of pyruvate dehydrogenase activity	0	1	0	0.929842	1	1	1
biological_process	GO:0010906	regulation of glucose metabolic process	0	2	0	0.967208	0.0948437	1	1
biological_process	GO:0045762	positive regulation of adenylate cyclase activity	0	3	0	0.803911	1	1	1
biological_process	GO:0097271	protein localization to bud neck	0	12	0	0.417339	1	1	1
biological_process	GO:0032392	DNA geometric change	0	2	0	0.349336	0.895835	1	1
biological_process	GO:0030491	heteroduplex formation	0	8	0	0.558591	1	1	1
biological_process	GO:0006268	DNA unwinding involved in DNA replication	0	18	0	0.269395	1	1	1
biological_process	GO:0044806	G-quadruplex DNA unwinding	0	2	0	0.864593	1	1	1
biological_process	GO:0098781	ncRNA transcription	0	5	0	0.1276	0.959891	1	1
biological_process	GO:0032211	negative regulation of telomere maintenance via telomerase	0	4	0	0.747477	1	1	1
biological_process	GO:0071932	replication fork reversal	0	4	0	0.747477	1	1	1
biological_process	GO:0070200	establishment of protein localization to telomere	0	1	0	0.929842	1	1	1
biological_process	GO:0071919	G-quadruplex DNA formation	0	2	0	0.864593	1	1	1
biological_process	GO:0001207	obsolete histone displacement	0	4	0	0.694994	1	1	1
biological_process	GO:0031848	protection from non-homologous end joining at telomere	0	2	0	0.864593	1	1	1
biological_process	GO:0010833	telomere maintenance via telomere lengthening	0	5	0	0.49005	0.826196	1	1
biological_process	GO:0030543	2-micrometer plasmid partitioning	0	7	0	0.600799	1	1	1
biological_process	GO:0050821	protein stabilization	0	20	0	0.232794	1	1	1
biological_process	GO:0000469	cleavage involved in rRNA processing	0	5	0	0.017831	0.997555	0.939	1
biological_process	GO:0006407	rRNA export from nucleus	0	18	0	0.269395	1	1	1
biological_process	GO:0002109	maturation of SSU-rRNA from tricistronic rRNA transcript (SSU-rRNA, LSU-rRNA,5S)	0	1	0	0.929842	1	1	1
biological_process	GO:0019941	modification-dependent protein catabolic process	0	5	0	0.932787	0.103381	1	1
biological_process	GO:0000028	ribosomal small subunit assembly	0	23	0	0.150164	1	1	1
biological_process	GO:0034644	cellular response to UV	0	2	0	0.939029	0.353813	1	1
biological_process	GO:0006333	chromatin assembly or disassembly	0	15	0	0.877632	0.187642	1	1
biological_process	GO:0045723	positive regulation of fatty acid biosynthetic process	0	1	0	0.929842	1	1	1
biological_process	GO:0032436	positive regulation of proteasomal ubiquitin-dependent protein catabolic process	0	3	0	0.939029	0.353813	1	1
biological_process	GO:0048260	positive regulation of receptor-mediated endocytosis	0	1	0	0.99867	0.0147057	1	1
biological_process	GO:0051865	protein autoubiquitination	0	7	0	0.689242	0.688268	1	1
biological_process	GO:0006513	protein monoubiquitination	0	15	0	0.311732	1	1	1
biological_process	GO:0032956	regulation of actin cytoskeleton organization	0	12	0	0.960575	0.0887197	1	1
biological_process	GO:0010794	regulation of dolichol biosynthetic process	0	1	0	0.929842	1	1	1
biological_process	GO:0032443	regulation of ergosterol biosynthetic process	0	3	0	0.957406	0.305006	1	1
biological_process	GO:0010793	regulation of mRNA export from nucleus	0	2	0	0.803911	1	1	1
biological_process	GO:0010796	regulation of multivesicular body size	0	1	0	0.929842	1	1	1
biological_process	GO:0019220	regulation of phosphate metabolic process	0	2	0	0.983222	0.03253	1	1
biological_process	GO:2000203	regulation of ribosomal large subunit export from nucleus	0	1	0	0.929842	1	1	1
biological_process	GO:2000232	regulation of rRNA processing	0	5	0	0.600799	1	1	1
biological_process	GO:2000238	regulation of tRNA export from nucleus	0	1	0	0.929842	1	1	1
biological_process	GO:2000235	regulation of tRNA processing	0	1	0	0.929842	1	1	1
biological_process	GO:0034517	ribophagy	0	7	0	0.600799	1	1	1
biological_process	GO:2000144	positive regulation of DNA-templated transcription, initiation	0	1	0	0.875935	0.275267	1	1
biological_process	GO:0006420	arginyl-tRNA aminoacylation	0	2	0	0.864593	1	1	1
biological_process	GO:0070144	mitochondrial arginyl-tRNA aminoacylation	0	1	0	0.929842	1	1	1
biological_process	GO:0006437	tyrosyl-tRNA aminoacylation	0	1	0	0.864593	1	1	1
biological_process	GO:0070184	mitochondrial tyrosyl-tRNA aminoacylation	0	1	0	0.929842	1	1	1
biological_process	GO:0043039	tRNA aminoacylation	0	2	0	0.206246	0.949934	1	1
biological_process	GO:0006435	threonyl-tRNA aminoacylation	0	2	0	0.864593	1	1	1
biological_process	GO:0007117	budding cell bud growth	0	11	0	0.930369	0.183372	1	1
biological_process	GO:0007010	cytoskeleton organization	0	13	0	0.953248	0.0728205	1	1
biological_process	GO:0043086	negative regulation of catalytic activity	0	1	0	0.865366	0.29134	1	1
biological_process	GO:0032185	septin cytoskeleton organization	0	5	0	0.495433	0.757368	1	1
biological_process	GO:0009826	unidimensional cell growth	0	2	0	0.747477	1	1	1
biological_process	GO:0070159	mitochondrial threonyl-tRNA aminoacylation	0	1	0	0.929842	1	1	1
biological_process	GO:0006433	prolyl-tRNA aminoacylation	0	2	0	0.864593	1	1	1
biological_process	GO:0000017	alpha-glucoside transport	0	4	0	0.747477	1	1	1
biological_process	GO:0008643	carbohydrate transport	0	32	0	0.562239	0.664914	1	1
biological_process	GO:0000023	maltose metabolic process	0	6	0	0.387991	1	1	1
biological_process	GO:0000154	rRNA modification	0	5	0	0.120581	1	1	1
biological_process	GO:1902626	assembly of large subunit precursor of preribosome	0	8	0	0.558591	1	1	1
biological_process	GO:0042789	mRNA transcription by RNA polymerase II	0	3	0	0.803911	1	1	1
biological_process	GO:0018230	peptidyl-L-cysteine S-palmitoylation	0	6	0	0.646187	1	1	1
biological_process	GO:0018345	protein palmitoylation	0	8	0	0.558591	1	1	1
biological_process	GO:0016558	protein import into peroxisome matrix	0	16	0	0.536523	0.798846	1	1
biological_process	GO:0051220	cytoplasmic sequestering of protein	0	1	0	0.985957	0.196089	1	1
biological_process	GO:0000729	DNA double-strand break processing	0	8	0	0.417339	1	1	1
biological_process	GO:0032297	negative regulation of DNA-dependent DNA replication initiation	0	2	0	0.864593	1	1	1
biological_process	GO:0101018	negative regulation of mitotic DNA replication initiation from late origin	0	1	0	0.929842	1	1	1
biological_process	GO:0070198	protein localization to chromosome, telomeric region	0	1	0	0.864593	1	1	1
biological_process	GO:0097752	regulation of DNA stability	0	2	0	0.864593	1	1	1
biological_process	GO:0000448	cleavage in ITS2 between 5.8S rRNA and LSU-rRNA of tricistronic rRNA transcript (SSU-rRNA, 5.8S rRNA, LSU-rRNA)	0	9	0	0.51934	1	1	1
biological_process	GO:0000479	endonucleolytic cleavage of tricistronic rRNA transcript (SSU-rRNA, 5.8S rRNA, LSU-rRNA)	0	4	0	0.0143604	1	0.909	1
biological_process	GO:0034198	cellular response to amino acid starvation	0	12	0	0.986815	0.0551123	1	1
biological_process	GO:0032008	positive regulation of TOR signaling	0	5	0	0.417339	1	1	1
biological_process	GO:1904263	positive regulation of TORC1 signaling	0	11	0	0.4489	1	1	1
biological_process	GO:1903432	regulation of TORC1 signaling	0	9	0	0.783949	0.487041	1	1
biological_process	GO:0006094	gluconeogenesis	0	14	0	0.647386	0.632703	1	1
biological_process	GO:0046166	glyceraldehyde-3-phosphate biosynthetic process	0	1	0	0.929842	1	1	1
biological_process	GO:0019563	glycerol catabolic process	0	6	0	0.646187	1	1	1
biological_process	GO:0034968	histone lysine methylation	0	2	0	0.446289	0.849836	1	1
biological_process	GO:0007097	nuclear migration	0	6	0	0.49005	0.826196	1	1
biological_process	GO:0031536	positive regulation of exit from mitosis	0	6	0	0.646187	1	1	1
biological_process	GO:0051594	detection of glucose	0	3	0	0.803911	1	1	1
biological_process	GO:0015755	fructose transmembrane transport	0	1	0	0.803911	1	1	1
biological_process	GO:0015761	mannose transmembrane transport	0	2	0	0.864593	1	1	1
biological_process	GO:0010507	negative regulation of autophagy	0	9	0	0.232794	1	1	1
biological_process	GO:2001108	positive regulation of Rho guanyl-nucleotide exchange factor activity	0	2	0	0.864593	1	1	1
biological_process	GO:0035025	positive regulation of Rho protein signal transduction	0	3	0	0.803911	1	1	1
biological_process	GO:1905356	regulation of snRNA pseudouridine synthesis	0	2	0	0.864593	1	1	1
biological_process	GO:0038202	TORC1 signaling	0	4	0	0.726206	0.553711	1	1
biological_process	GO:1904902	ESCRT III complex assembly	0	2	0	0.864593	1	1	1
biological_process	GO:0007266	Rho protein signal transduction	0	8	0	0.250429	1	1	1
biological_process	GO:0031335	regulation of sulfur amino acid metabolic process	0	4	0	0.694994	1	1	1
biological_process	GO:0044262	cellular carbohydrate metabolic process	0	6	0	0.070525	0.967906	1	1
biological_process	GO:0071465	cellular response to desiccation	0	3	0	0.803911	1	1	1
biological_process	GO:0072657	protein localization to membrane	0	3	0	0.831626	0.252101	1	1
biological_process	GO:0051180	vitamin transport	0	2	0	0.872596	0.48066	1	1
biological_process	GO:1902047	polyamine transmembrane transport	0	1	0	0.864593	1	1	1
biological_process	GO:0015847	putrescine transport	0	5	0	0.694994	1	1	1
biological_process	GO:0015848	spermidine transport	0	5	0	0.694994	1	1	1
biological_process	GO:0015846	polyamine transport	0	2	0	0.953137	0.203927	1	1
biological_process	GO:0035970	peptidyl-threonine dephosphorylation	0	4	0	0.747477	1	1	1
biological_process	GO:0070413	trehalose metabolism in response to stress	0	1	0	0.864593	1	1	1
biological_process	GO:0046939	nucleotide phosphorylation	0	1	0	0.0968125	1	1	1
biological_process	GO:0071497	cellular response to freezing	0	1	0	0.99509	0.135407	1	1
biological_process	GO:1902657	protein localization to prospore membrane	0	1	0	0.929842	1	1	1
biological_process	GO:0031382	mating projection formation	0	2	0	0.600799	1	1	1
biological_process	GO:0008360	regulation of cell shape	0	22	0	0.186981	1	1	1
biological_process	GO:0000027	ribosomal large subunit assembly	0	38	0	0.0538755	1	1	1
biological_process	GO:0036261	7-methylguanosine cap hypermethylation	0	9	0	0.51934	1	1	1
biological_process	GO:0000755	cytogamy	0	11	0	0.417339	1	1	1
biological_process	GO:0032507	maintenance of protein location in cell	0	2	0	0.255937	0.932874	1	1
biological_process	GO:2000114	regulation of establishment of cell polarity	0	2	0	0.803911	1	1	1
biological_process	GO:0043972	histone H3-K23 acetylation	0	2	0	0.864593	1	1	1
biological_process	GO:0043974	histone H3-K27 acetylation	0	1	0	0.929842	1	1	1
biological_process	GO:0097043	histone H3-K56 acetylation	0	4	0	0.747477	1	1	1
biological_process	GO:0043970	histone H3-K9 acetylation	0	3	0	0.646187	1	1	1
biological_process	GO:0010526	negative regulation of transposition, RNA-mediated	0	8	0	0.558591	1	1	1
biological_process	GO:0006334	nucleosome assembly	0	20	0	0.446289	0.849836	1	1
biological_process	GO:0018394	peptidyl-lysine acetylation	0	2	0	0.993669	0.0173461	1	1
biological_process	GO:0006473	protein acetylation	0	5	0	0.979008	0.0480569	1	1
biological_process	GO:2001032	regulation of double-strand break repair via nonhomologous end joining	0	1	0	0.600799	1	1	1
biological_process	GO:0000492	box C/D snoRNP assembly	0	9	0	0.51934	1	1	1
biological_process	GO:0006335	DNA replication-dependent chromatin assembly	0	8	0	0.558591	1	1	1
biological_process	GO:0006336	DNA replication-independent chromatin assembly	0	6	0	0.918516	0.399201	1	1
biological_process	GO:2000001	regulation of DNA damage checkpoint	0	3	0	0.600799	1	1	1
biological_process	GO:1903775	regulation of DNA double-strand break processing	0	2	0	0.864593	1	1	1
biological_process	GO:1905329	sphingoid long-chain base transport	0	3	0	0.803911	1	1	1
biological_process	GO:0070301	cellular response to hydrogen peroxide	0	9	0	0.742753	0.639299	1	1
biological_process	GO:0009303	rRNA transcription	0	6	0	0.363902	0.843767	1	1
biological_process	GO:0000387	spliceosomal snRNP assembly	0	11	0	0.311732	1	1	1
biological_process	GO:0045116	protein neddylation	0	6	0	0.646187	1	1	1
biological_process	GO:0030162	regulation of proteolysis	0	5	0	0.870881	0.31314	1	1
biological_process	GO:0070911	global genome nucleotide-excision repair	0	8	0	0.558591	1	1	1
biological_process	GO:2001165	positive regulation of phosphorylation of RNA polymerase II C-terminal domain serine 2 residues	0	4	0	0.747477	1	1	1
biological_process	GO:2001209	positive regulation of transcription elongation from RNA polymerase I promoter	0	9	0	0.51934	1	1	1
biological_process	GO:0034402	recruitment of 3'-end processing factors to RNA polymerase II holoenzyme complex	0	3	0	0.747477	1	1	1
biological_process	GO:2001173	regulation of histone H2B conserved C-terminal lysine ubiquitination	0	5	0	0.694994	1	1	1
biological_process	GO:2001166	regulation of histone H2B ubiquitination	0	2	0	0.646187	1	1	1
biological_process	GO:0051569	regulation of histone H3-K4 methylation	0	3	0	0.694994	1	1	1
biological_process	GO:2001160	regulation of histone H3-K79 methylation	0	1	0	0.929842	1	1	1
biological_process	GO:2001163	regulation of phosphorylation of RNA polymerase II C-terminal domain serine 2 residues	0	2	0	0.747477	1	1	1
biological_process	GO:0090262	regulation of transcription-coupled nucleotide-excision repair	0	7	0	0.600799	1	1	1
biological_process	GO:0001015	snoRNA transcription by RNA polymerase II	0	4	0	0.747477	1	1	1
biological_process	GO:0031930	mitochondria-nucleus signaling pathway	0	7	0	0.600799	1	1	1
biological_process	GO:0001079	nitrogen catabolite regulation of transcription from RNA polymerase II promoter	0	1	0	0.985294	0.103743	1	1
biological_process	GO:0006103	2-oxoglutarate metabolic process	0	6	0	0.600799	1	1	1
biological_process	GO:0006099	tricarboxylic acid cycle	0	30	0	0.112073	1	1	1
biological_process	GO:0006449	regulation of translational termination	0	8	0	0.4489	1	1	1
biological_process	GO:0035269	protein O-linked mannosylation	0	12	0	0.417339	1	1	1
biological_process	GO:0034220	ion transmembrane transport	0	6	0	0.00622404	0.998239	0.603	1
biological_process	GO:0120029	proton export across plasma membrane	0	2	0	0.864593	1	1	1
biological_process	GO:0051237	maintenance of RNA location	0	4	0	0.747477	1	1	1
biological_process	GO:0009298	GDP-mannose biosynthetic process	0	3	0	0.803911	1	1	1
biological_process	GO:0006013	mannose metabolic process	0	4	0	0.694994	1	1	1
biological_process	GO:0000350	generation of catalytic spliceosome for second transesterification step	0	10	0	0.482841	1	1	1
biological_process	GO:0000390	spliceosomal complex disassembly	0	6	0	0.646187	1	1	1
biological_process	GO:0043409	negative regulation of MAPK cascade	0	6	0	0.600799	1	1	1
biological_process	GO:0035335	peptidyl-tyrosine dephosphorylation	0	2	0	0.864593	1	1	1
biological_process	GO:0043709	cell adhesion involved in single-species biofilm formation	0	4	0	0.957406	0.305006	1	1
biological_process	GO:0006206	pyrimidine nucleobase metabolic process	0	2	0	0.335326	1	1	1
biological_process	GO:0090158	endoplasmic reticulum membrane organization	0	6	0	0.51934	1	1	1
biological_process	GO:0061817	endoplasmic reticulum-plasma membrane tethering	0	5	0	0.694994	1	1	1
biological_process	GO:0042308	negative regulation of protein import into nucleus	0	1	0	0.929842	1	1	1
biological_process	GO:0032377	regulation of intracellular lipid transport	0	1	0	0.929842	1	1	1
biological_process	GO:0060304	regulation of phosphatidylinositol dephosphorylation	0	7	0	0.600799	1	1	1
biological_process	GO:0000752	agglutination involved in conjugation with cellular fusion	0	4	0	0.747477	1	1	1
biological_process	GO:0098609	cell-cell adhesion	0	2	0	0.98643	0.0699231	1	1
biological_process	GO:0031204	posttranslational protein targeting to membrane, translocation	0	12	0	0.360701	1	1	1
biological_process	GO:0006882	cellular zinc ion homeostasis	0	12	0	0.417339	1	1	1
biological_process	GO:1901856	negative regulation of cellular respiration	0	1	0	0.929842	1	1	1
biological_process	GO:0051091	positive regulation of DNA-binding transcription factor activity	0	2	0	0.864593	1	1	1
biological_process	GO:0036091	positive regulation of transcription from RNA polymerase II promoter in response to oxidative stress	0	1	0	0.99509	0.135407	1	1
biological_process	GO:0015680	protein maturation by copper ion transfer	0	5	0	0.694994	1	1	1
biological_process	GO:0019430	removal of superoxide radicals	0	6	0	0.646187	1	1	1
biological_process	GO:0006801	superoxide metabolic process	0	1	0	0.646187	1	1	1
biological_process	GO:0043934	sporulation	0	5	0	0.856354	0.21776	1	1
biological_process	GO:0071163	DNA replication preinitiation complex assembly	0	1	0	0.803911	1	1	1
biological_process	GO:1902977	mitotic DNA replication preinitiation complex assembly	0	3	0	0.803911	1	1	1
biological_process	GO:0031333	negative regulation of protein-containing complex assembly	0	6	0	0.895045	0.273794	1	1
biological_process	GO:0046488	phosphatidylinositol metabolic process	0	5	0	0.671187	0.494806	1	1
biological_process	GO:0017157	regulation of exocytosis	0	6	0	0.97163	0.152163	1	1
biological_process	GO:0061091	regulation of phospholipid translocation	0	3	0	0.646187	1	1	1
biological_process	GO:0035543	positive regulation of SNARE complex assembly	0	2	0	0.864593	1	1	1
biological_process	GO:0046578	regulation of Ras protein signal transduction	0	5	0	0.802034	0.411196	1	1
biological_process	GO:0006370	7-methylguanosine mRNA capping	0	8	0	0.558591	1	1	1
biological_process	GO:2001208	negative regulation of transcription elongation by RNA polymerase I	0	2	0	0.864593	1	1	1
biological_process	GO:0034243	regulation of transcription elongation from RNA polymerase II promoter	0	2	0	0.972478	0.0629656	1	1
biological_process	GO:0098787	mRNA cleavage involved in mRNA processing	0	2	0	0.995853	0.0194282	1	1
biological_process	GO:0000379	tRNA-type intron splice site recognition and cleavage	0	4	0	0.747477	1	1	1
biological_process	GO:0045005	DNA-dependent DNA replication maintenance of fidelity	0	3	0	0.405358	0.870268	1	1
biological_process	GO:0060257	negative regulation of flocculation	0	1	0	0.929842	1	1	1
biological_process	GO:1990248	regulation of transcription from RNA polymerase II promoter in response to DNA damage	0	1	0	0.929842	1	1	1
biological_process	GO:0016180	snRNA processing	0	1	0	0.820815	0.439288	1	1
biological_process	GO:0016031	tRNA import into mitochondrion	0	1	0	0.929842	1	1	1
biological_process	GO:0070072	vacuolar proton-transporting V-type ATPase complex assembly	0	8	0	0.558591	1	1	1
biological_process	GO:0006031	chitin biosynthetic process	0	4	0	0.952874	0.161461	1	1
biological_process	GO:0070940	dephosphorylation of RNA polymerase II C-terminal domain	0	6	0	0.646187	1	1	1
biological_process	GO:0009302	sno(s)RNA transcription	0	1	0	0.694994	1	1	1
biological_process	GO:0031564	transcription antitermination	0	3	0	0.803911	1	1	1
biological_process	GO:0034724	DNA replication-independent chromatin organization	0	3	0	0.847837	0.517159	1	1
biological_process	GO:0007063	regulation of sister chromatid cohesion	0	1	0	0.482841	1	1	1
biological_process	GO:0016094	polyprenol biosynthetic process	0	2	0	0.694994	1	1	1
biological_process	GO:0070417	cellular response to cold	0	2	0	0.973212	0.252523	1	1
biological_process	GO:0006073	cellular glucan metabolic process	0	4	0	0.371036	0.812168	1	1
biological_process	GO:0009251	glucan catabolic process	0	4	0	0.4489	1	1	1
biological_process	GO:0050790	regulation of catalytic activity	0	12	0	0.980774	0.0335934	1	1
biological_process	GO:0120236	negative regulation of posttranslational protein targeting to membrane, translocation	0	2	0	0.864593	1	1	1
biological_process	GO:0045047	protein targeting to ER	0	10	0	0.676183	0.5568	1	1
biological_process	GO:0071630	nuclear protein quality control by the ubiquitin-proteasome system	0	5	0	0.694994	1	1	1
biological_process	GO:0031144	proteasome localization	0	2	0	0.864593	1	1	1
biological_process	GO:0032509	endosome transport via multivesicular body sorting pathway	0	7	0	0.757302	0.41361	1	1
biological_process	GO:0043200	response to amino acid	0	3	0	0.796073	0.582661	1	1
biological_process	GO:0051053	negative regulation of DNA metabolic process	0	1	0	0.550652	0.715578	1	1
biological_process	GO:0070898	RNA polymerase III preinitiation complex assembly	0	6	0	0.646187	1	1	1
biological_process	GO:0018026	peptidyl-lysine monomethylation	0	7	0	0.600799	1	1	1
biological_process	GO:0006617	SRP-dependent cotranslational protein targeting to membrane, signal sequence recognition	0	1	0	0.929842	1	1	1
biological_process	GO:0006386	termination of RNA polymerase III transcription	0	17	0	0.289793	1	1	1
biological_process	GO:0006383	transcription by RNA polymerase III	0	27	0	0.174759	0.959824	1	1
biological_process	GO:0006384	transcription initiation from RNA polymerase III promoter	0	19	0	0.161554	1	1	1
biological_process	GO:0042797	tRNA transcription by RNA polymerase III	0	18	0	0.269395	1	1	1
biological_process	GO:0071333	cellular response to glucose stimulus	0	1	0	0.98975	0.0578474	1	1
biological_process	GO:0001188	RNA polymerase I preinitiation complex assembly	0	2	0	0.864593	1	1	1
biological_process	GO:0006360	transcription by RNA polymerase I	0	19	0	0.716963	0.444506	1	1
biological_process	GO:0006362	transcription elongation from RNA polymerase I promoter	0	18	0	0.173804	1	1	1
biological_process	GO:0006361	transcription initiation from RNA polymerase I promoter	0	18	0	0.250429	1	1	1
biological_process	GO:0043628	ncRNA 3'-end processing	0	7	0	0.855349	0.285819	1	1
biological_process	GO:0070651	nonfunctional rRNA decay	0	24	0	0.173804	1	1	1
biological_process	GO:0071042	nuclear polyadenylation-dependent mRNA catabolic process	0	15	0	0.335326	1	1	1
biological_process	GO:0071035	nuclear polyadenylation-dependent rRNA catabolic process	0	19	0	0.250429	1	1	1
biological_process	GO:0071038	nuclear polyadenylation-dependent tRNA catabolic process	0	16	0	0.311732	1	1	1
biological_process	GO:0070478	nuclear-transcribed mRNA catabolic process, 3'-5' exonucleolytic nonsense-mediated decay	0	17	0	0.289793	1	1	1
biological_process	GO:0034427	nuclear-transcribed mRNA catabolic process, exonucleolytic, 3'-5'	0	14	0	0.269395	1	1	1
biological_process	GO:0071051	polyadenylation-dependent snoRNA 3'-end processing	0	15	0	0.335326	1	1	1
biological_process	GO:0006396	RNA processing	0	18	0	0.0265387	0.983147	0.989	1
biological_process	GO:0034475	U4 snRNA 3'-end processing	0	15	0	0.335326	1	1	1
biological_process	GO:0045903	positive regulation of translational fidelity	0	9	0	0.51934	1	1	1
biological_process	GO:0006314	intron homing	0	6	0	0.558591	1	1	1
biological_process	GO:0008380	RNA splicing	0	14	0	0.0457793	0.981732	1	1
biological_process	GO:0015990	electron transport coupled proton transport	0	4	0	0.747477	1	1	1
biological_process	GO:0006123	mitochondrial electron transport, cytochrome c to oxygen	0	18	0	0.269395	1	1	1
biological_process	GO:0022904	respiratory electron transport chain	0	7	0	0.165262	0.962667	1	1
biological_process	GO:0051457	maintenance of protein location in nucleus	0	5	0	0.694994	1	1	1
[truncated: 4,716 more rows]
[truncated: 147 more columns]

## Sheet: polyQ⁄N
GO domain	GO ID	GO term	polyQ⁄N protein	total number	number / total	raw p-value under-representation	raw p-value over-representation	FWER under-representation	FWER over-representation	Gene Name
[truncated: 6,054 more rows]
[truncated: 688 more columns]

[truncated: 19 more sheets: polyN, polyY, polyW, polyC, polyP, polyA, polyS, polyT, polyD, polyE, polyG, polyF, polyH, polyI, polyL, polyV, polyM, polyR, polyK]
