# Supplementary material for: Noncanonical usage of stop codons in ciliates expands proteins with Q-rich motifs
Source: bioRxiv preprint, doi:10.1101/2020.12.08.407247, version 3 (2023-11-13)
Supplement: Dataset DS8 [file 407247_file22.xlsx]

## Sheet: SCD
GO domain	GO ID	GO term	SCD protein	total number	number / total	raw p-value under-representation	raw p-value over-representation	FWER under-representation	FWER over-representation	Gene Name
biological_process	GO:0006357	regulation of transcription by RNA polymerase II	57	144	0.395833	1	8.26595e-16	1	0	PACC_CANAL	RUVB2_CANAL	TRY5_CANAL	SSN2_CANAL	HSF_CANAL	CZF1_CANAL	MCM1_CANAL	FKH2_CANAL	ACE2_CANAL	CRZ1_CANAL	MED8_CANAL	SKN7_CANAL	SKO1_CANAL	SPT20_CANAL	TRY2_CANAL	SSN8_CANAL	SFL1_CANAL	SFL2_CANAL	RPN4_CANAL	MED18_CANAL	UPC2_CANAL	RFX1_CANAL	TEC1_CANAL	ARP4_CANAL	CAS5_CANAL	BCR1_CANAL	A0A1D8PN91_CANAL	A0A1D8PRN4_CANAL	Q59M28_CANAL	A0A1D8PJZ6_CANAL	Q5ANI0_CANAL	A0A1D8PIE8_CANAL	Q5A5T7_CANAL	A0A1D8PNK6_CANAL	A0A1D8PEG7_CANAL	Q5AA11_CANAL	A0A1D8PU33_CANAL	Q59T89_CANAL	A0A1D8PFN2_CANAL	A0A1D8PEC5_CANAL
biological_process	GO:0045944	positive regulation of transcription by RNA polymerase II	46	105	0.438095	1	3.39212e-09	1	0	PACC_CANAL	EFG1_CANAL	MCM1_CANAL	GAT1_CANAL	SSN8_CANAL	SFU1_CANAL	SFL2_CANAL	WOR1_CANAL	MRR1_CANAL	UPC2_CANAL	TEC1_CANAL	GZF3_CANAL	EFH1_CANAL	A0A1D8PRN4_CANAL	A0A1D8PHW6_CANAL	A0A1D8PU36_CANAL	A0A1D8PCY0_CANAL	A0A1D8PRB7_CANAL	A0A1D8PNI3_CANAL	A0A1D8PKJ2_CANAL	A0A1D8PL89_CANAL	A0A1D8PNM8_CANAL	Q5ADP3_CANAL	A0A1D8PG41_CANAL	Q5AKX6_CANAL	A0A1D8PGH7_CANAL	A0A1D8PLI4_CANAL	Q5AG95_CANAL	Q5A683_CANAL	A0A1D8PL95_CANAL	A0A1D8PNH8_CANAL	A0A1D8PNF7_CANAL	Q59TU4_CANAL	A0A1D8PMD1_CANAL	Q5APB2_CANAL	A0A1D8PNA9_CANAL	A0A1D8PHX3_CANAL	A0A1D8PF20_CANAL	A0A1D8PNX9_CANAL	A0A1D8PJX7_CANAL
biological_process	GO:0006355	regulation of transcription, DNA-templated	25	66	0.378788	1	7.27039e-17	1	0	SEF1_CANAL	HIR2_CANAL	CPH1_CANAL	CRZ1_CANAL	SET2_CANAL	WAR1_CANAL	WOR1_CANAL	TEC1_CANAL	ADF1_CANAL	A0A1D8PD52_CANAL	A0A1D8PN91_CANAL	Q5ANI0_CANAL	Q59M50_CANAL	Q5ADX8_CANAL	A0A1D8PLY0_CANAL	Q5AHD5_CANAL	A0A1D8PGW0_CANAL	Q59UR3_CANAL	A0A1D8PPL1_CANAL	Q5A683_CANAL	Q5ALK1_CANAL	A0A1D8PQM5_CANAL	A0A1D8PND3_CANAL	Q5AKV1_CANAL	A0A1D8PGK4_CANAL
biological_process	GO:0007155	cell adhesion	22	43	0.511628	1	2.58968e-07	1	0	PGA47_CANAL	TRY5_CANAL	EFG1_CANAL	MP65_CANAL	MCM1_CANAL	ALS9_CANAL	AFT2_CANAL	FGR41_CANAL	BUD4_CANAL	ACE2_CANAL	TRY2_CANAL	WAR1_CANAL	WOR1_CANAL	UME6_CANAL	TEC1_CANAL	CAS5_CANAL	FGR23_CANAL	ALS1_CANAL	ADF1_CANAL	A0A1D8PD52_CANAL	Q59UR3_CANAL	A0A1D8PKY7_CANAL
biological_process	GO:0035556	intracellular signal transduction	21	46	0.456522	1	1.19976e-07	1	0	SCH9_CANAL	STE20_CANAL	HSL1_CANAL	GIN4_CANAL	CLA4_CANAL	A0A1D8PPB9_CANAL	Q5ANK2_CANAL	A0A1D8PQP3_CANAL	A0A1D8PHP6_CANAL	Q5A650_CANAL	A0A1D8PH53_CANAL	A0A1D8PKQ6_CANAL	Q59TB3_CANAL	A0A1D8PJ04_CANAL	A0A1D8PRN8_CANAL	Q59QB9_CANAL	A0A1D8PNF8_CANAL	A0A1D8PDS9_CANAL	Q5AH90_CANAL	A0A1D8PDY7_CANAL	Q59UZ0_CANAL
biological_process	GO:0006351	transcription, DNA-templated	15	40	0.375	1	6.44305e-16	1	0	SEF1_CANAL	HIR2_CANAL	MRR1_CANAL	A0A1D8PME2_CANAL	A0A1D8PHW6_CANAL	A0A1D8PEX3_CANAL	A0A1D8PCY0_CANAL	A0A1D8PRB7_CANAL	A0A1D8PNI3_CANAL	A0A1D8PNM8_CANAL	A0A1D8PGH7_CANAL	Q5AF55_CANAL	A0A1D8PLI4_CANAL	Q5AAV6_CANAL	A0A1D8PKE5_CANAL
biological_process	GO:1900430	positive regulation of filamentous growth of a population of unicellular organisms	8	15	0.533333	0.999999	2.89023e-06	1	0	PACC_CANAL	PALA_CANAL	CPH1_CANAL	TEC1_CANAL	A0A1D8PFN2_CANAL	Q59UR3_CANAL	A0A1D8PGF8_CANAL	A0A1D8PGK4_CANAL
biological_process	GO:0007165	signal transduction	8	28	0.285714	1	5.29553e-07	1	0	IQG1_CANAL	Q5ANK2_CANAL	A0A1D8PPS8_CANAL	Q59X47_CANAL	A0A1D8PRQ6_CANAL	Q5AKY0_CANAL	A0A1D8PT45_CANAL	A0A1D8PH46_CANAL
biological_process	GO:0045893	positive regulation of transcription, DNA-templated	8	21	0.380952	1	3.18093e-11	1	0	RBF1_CANAL	MED16_CANAL	Q5ANL4_CANAL	A0A1D8PLL4_CANAL	A0A1D8PNI3_CANAL	A0A1D8PNX9_CANAL	A0A1D8PSF1_CANAL	A0A1D8PF53_CANAL
biological_process	GO:0010468	regulation of gene expression	4	13	0.307692	1	9.35732e-17	1	0	A0A1D8PM79_CANAL	Q5ADP3_CANAL	A0A1D8PRH3_CANAL	A0A1D8PQ55_CANAL
biological_process	GO:0006366	transcription by RNA polymerase II	2	16	0.125	1	2.9048e-15	1	0	A0A1D8PU74_CANAL	A0A1D8PG88_CANAL
biological_process	GO:0043170	macromolecule metabolic process	2	2	1	0.999999	1.11054e-06	1	0	A0A1D8PFI5_CANAL	A0A1D8PLF7_CANAL
biological_process	GO:0080090	regulation of primary metabolic process	2	4	0.5	1	2.44365e-16	1	0	Q59X47_CANAL	Q5AKY0_CANAL
biological_process	GO:1900428	regulation of filamentous growth of a population of unicellular organisms	1	4	0.25	0.999998	4.1634e-06	1	0	CPH1_CANAL
biological_process	GO:0010570	regulation of filamentous growth	1	3	0.333333	0.999999	3.64377e-06	1	0	A0A1D8PKB4_CANAL
biological_process	GO:0060255	regulation of macromolecule metabolic process	1	1	1	1	3.25695e-18	1	0	A0A1D8PCK0_CANAL
biological_process	GO:0051252	regulation of RNA metabolic process	1	2	0.5	1	7.89477e-20	1	0	A0A1D8PQ55_CANAL
biological_process	GO:0032774	RNA biosynthetic process	0	1	0	1	1.20519e-15	1	0
biological_process	GO:0090033	positive regulation of filamentous growth	0	2	0	0.999999	2.89023e-06	1	0
biological_process	GO:0044260	cellular macromolecule metabolic process	0	1	0	0.999998	2.85664e-06	1	0
biological_process	GO:0016070	RNA metabolic process	0	3	0	1	2.02839e-08	1	0
biological_process	GO:0050896	response to stimulus	0	1	0	0.999998	2.32387e-06	1	0
biological_process	GO:2000112	regulation of cellular macromolecule biosynthetic process	0	1	0	1	1.30399e-17	1	0
biological_process	GO:0019222	regulation of metabolic process	0	1	0	1	4.65906e-16	1	0
biological_process	GO:0006725	cellular aromatic compound metabolic process	0	1	0	0.999998	2.27344e-06	1	0
biological_process	GO:0030447	filamentous growth	103	387	0.26615	0.999993	1.08693e-05	1	0.002	PACC_CANAL	SCH9_CANAL	STE20_CANAL	SEF1_CANAL	SSN2_CANAL	KMO_CANAL	CZF1_CANAL	CG24_CANAL	MP65_CANAL	MCM1_CANAL	GDA1_CANAL	FGR41_CANAL	BRE1_CANAL	PALA_CANAL	CPH1_CANAL	CRZ1_CANAL	RFX2_CANAL	SKN7_CANAL	SHE3_CANAL	NIK1_CANAL	STE7_CANAL	SFL2_CANAL	WOR2_CANAL	VAC8_CANAL	TUP1_CANAL	TEC1_CANAL	RBF1_CANAL	CDC42_CANAL	ALO1_CANAL	CAS5_CANAL	GZF3_CANAL	CHI2_CANAL	GIN4_CANAL	ALS1_CANAL	CLA4_CANAL	ADF1_CANAL	A0A1D8PH81_CANAL	A0A1D8PHD4_CANAL	Q5ANL4_CANAL	A0A1D8PRF5_CANAL
biological_process	GO:0044182	filamentous growth of a population of unicellular organisms	44	161	0.273292	0.999979	3.51984e-05	1	0.013	PACC_CANAL	SCH9_CANAL	STE20_CANAL	RMD9_CANAL	MCM1_CANAL	PALA_CANAL	CPH1_CANAL	RFX2_CANAL	STE7_CANAL	SFL2_CANAL	WOR1_CANAL	TUP1_CANAL	TEC1_CANAL	CDC42_CANAL	ALO1_CANAL	CHI2_CANAL	GIN4_CANAL	ALS1_CANAL	A0A1D8PH81_CANAL	A0A1D8PHD4_CANAL	A0A1D8PRF5_CANAL	Q5ADL6_CANAL	A0A1D8PJZ6_CANAL	A0A1D8PLL4_CANAL	Q5ADM0_CANAL	A0A1D8PN45_CANAL	Q5AHB5_CANAL	A0A1D8PFH4_CANAL	A0A1D8PU74_CANAL	A0A1D8PEG7_CANAL	Q5ADP3_CANAL	Q5A9A6_CANAL	Q59UR3_CANAL	A0A1D8PJR4_CANAL	A0A1D8PGF8_CANAL	A0A1D8PMD1_CANAL	Q5APB2_CANAL	A0A1D8PNF8_CANAL	Q5A5R4_CANAL	A0A1D8PJG1_CANAL
biological_process	GO:0007049	cell cycle	8	25	0.32	0.999967	5.73548e-05	1	0.032	CD123_CANAL	TBF1_CANAL	CDC42_CANAL	Q5ADM0_CANAL	A0A1D8PE86_CANAL	Q59Q35_CANAL	A0A1D8PDJ8_CANAL	A0A1D8PJZ1_CANAL
biological_process	GO:0061013	regulation of mRNA catabolic process	1	1	1	0.999971	0.000108375	1	0.055	Q5A5R5_CANAL
biological_process	GO:0043708	cell adhesion involved in biofilm formation	1	1	1	0.999935	0.000225763	1	0.103	Q5ANF0_CANAL
biological_process	GO:0006974	cellular response to DNA damage stimulus	8	24	0.333333	0.999858	0.000261863	1	0.154	CSM3_CANAL	RFX1_CANAL	A0A1D8PI62_CANAL	A0A1D8PKJ3_CANAL	A0A1D8PF47_CANAL	A0A1D8PLT5_CANAL	Q5A5R4_CANAL	A0A1D8PRP3_CANAL
biological_process	GO:0043709	cell adhesion involved in single-species biofilm formation	8	18	0.444444	0.999927	0.00026305	1	0.156	MP65_CANAL	ALS5_CANAL	ALS9_CANAL	ALS2_CANAL	ALS6_CANAL	ALS1_CANAL	ALS3_CANAL	ALS4_CANAL
biological_process	GO:0043488	regulation of mRNA stability	3	3	1	0.999927	0.00026305	1	0.156	A0A1D8PJ46_CANAL	A0A1D8PFN4_CANAL	A0A1D8PCH2_CANAL
biological_process	GO:1900443	regulation of filamentous growth of a population of unicellular organisms in response to biotic stimulus	5	13	0.384615	0.999884	0.000370907	1	0.194	CZF1_CANAL	A0A1D8PNM8_CANAL	A0A1D8PJX7_CANAL	A0A1D8PHG0_CANAL	A0A1D8PJ72_CANAL
biological_process	GO:0051726	regulation of cell cycle	3	13	0.230769	0.99982	0.000374247	1	0.195	A0A1D8PHK4_CANAL	A0A1D8PSZ1_CANAL	A0A1D8PCB2_CANAL
biological_process	GO:0043487	regulation of RNA stability	0	1	0	0.999892	0.000374415	1	0.195
biological_process	GO:0006402	mRNA catabolic process	1	2	0.5	0.999836	0.000408851	1	0.203	A0A1D8PTZ1_CANAL
biological_process	GO:0043710	cell adhesion involved in multi-species biofilm formation	7	10	0.7	0.999953	0.000569396	1	0.287	ALS5_CANAL	ALS9_CANAL	ALS2_CANAL	ALS6_CANAL	ALS1_CANAL	ALS3_CANAL	ALS4_CANAL
biological_process	GO:0006468	protein phosphorylation	20	57	0.350877	0.999721	0.000585878	1	0.288	STE20_CANAL	SSN3_CANAL	HSL1_CANAL	PRK1_CANAL	STE7_CANAL	GIN4_CANAL	CLA4_CANAL	A0A1D8PH81_CANAL	Q5ANK2_CANAL	A0A1D8PQT9_CANAL	Q5A650_CANAL	A0A1D8PH53_CANAL	A0A1D8PKQ6_CANAL	Q59TB3_CANAL	A0A1D8PLR0_CANAL	A0A1D8PJ04_CANAL	A0A1D8PRI2_CANAL	A0A1D8PHD2_CANAL	A0A1D8PDY7_CANAL	Q59UZ0_CANAL
biological_process	GO:0051276	chromosome organization	0	3	0	0.999466	0.000858542	1	0.384
biological_process	GO:1900445	positive regulation of filamentous growth of a population of unicellular organisms in response to biotic stimulus	15	36	0.416667	0.999651	0.00121246	1	0.514	CPH1_CANAL	CRZ1_CANAL	SKN7_CANAL	NIK1_CANAL	TEC1_CANAL	CDC42_CANAL	CLA4_CANAL	A0A1D8PME2_CANAL	A0A1D8PHW6_CANAL	A0A1D8PQP3_CANAL	Q5A3L9_CANAL	A0A1D8PRB7_CANAL	Q59UR3_CANAL	A0A1D8PJG1_CANAL	A0A1D8PGK4_CANAL
biological_process	GO:0048478	replication fork protection	4	4	1	1	0.00123811	1	0.598	CCR4_CANAL	CSM3_CANAL	TOF1_CANAL	A0A1D8PP50_CANAL
biological_process	GO:0007019	microtubule depolymerization	2	2	1	1	0.00123811	1	0.598	A0A1D8PKA4_CANAL	A0A1D8PT88_CANAL
biological_process	GO:0031589	cell-substrate adhesion	1	5	0.2	0.999535	0.00126169	1	0.598	MP65_CANAL
biological_process	GO:0045324	late endosome to vacuole transport	5	10	0.5	0.999604	0.00142581	1	0.634	BRO1_CANAL	A0A1D8PNJ4_CANAL	A0A1D8PMH5_CANAL	Q5A501_CANAL	A0A1D8PLM0_CANAL
biological_process	GO:0044010	single-species biofilm formation	0	4	0	0.999253	0.00153926	1	0.662
biological_process	GO:0030010	establishment of cell polarity	6	9	0.666667	0.999514	0.00192309	1	0.701	CDC42_CANAL	Q59RK1_CANAL	A0A1D8PM39_CANAL	A0A1D8PGF8_CANAL	A0A1D8PMI1_CANAL	A0A1D8PE85_CANAL
biological_process	GO:0098609	cell-cell adhesion	9	14	0.642857	0.999463	0.0024504	1	0.758	ALS5_CANAL	ALS9_CANAL	TUP1_CANAL	ALS2_CANAL	ALS6_CANAL	ALS1_CANAL	ALS3_CANAL	ALS4_CANAL	ADF1_CANAL
biological_process	GO:0051056	regulation of small GTPase mediated signal transduction	1	1	1	0.999463	0.0024504	1	0.758	A0A1D8PMB6_CANAL
biological_process	GO:0006281	DNA repair	24	71	0.338028	0.99856	0.00250209	1	0.76	SLX4_CANAL	RUVB2_CANAL	SPT16_CANAL	DEF1_CANAL	CSM3_CANAL	SWC4_CANAL	TOF1_CANAL	RAD5_CANAL	ATM_CANAL	ARP4_CANAL	HSM3_CANAL	EAF1_CANAL	A0A1D8PCY7_CANAL	Q59Q44_CANAL	A0A1D8PGW0_CANAL	A0A1D8PL51_CANAL	A0A1D8PPL1_CANAL	A0A1D8PQP2_CANAL	A0A1D8PPB3_CANAL	A0A1D8PJZ1_CANAL	A0A1D8PL46_CANAL	Q5A5R4_CANAL	A0A1D8PRP3_CANAL	Q59UQ6_CANAL
biological_process	GO:0016310	phosphorylation	2	5	0.4	0.998575	0.00260244	1	0.767	Q5A3L3_CANAL	Q5AMG6_CANAL
biological_process	GO:0071467	cellular response to pH	7	18	0.388889	0.998848	0.00269144	1	0.796	PACC_CANAL	PALA_CANAL	Q5ANL4_CANAL	Q5AHB5_CANAL	A0A1D8PH22_CANAL	Q59WF8_CANAL	Q59N31_CANAL
biological_process	GO:0044271	cellular nitrogen compound biosynthetic process	1	2	0.5	0.997956	0.00269691	1	0.796	Q59Z33_CANAL
biological_process	GO:0007264	small GTPase mediated signal transduction	6	21	0.285714	0.998816	0.0030984	1	0.827	Q5AMQ3_CANAL	A0A1D8PLJ2_CANAL	A0A1D8PTI9_CANAL	A0A1D8PHR4_CANAL	A0A1D8PH14_CANAL	A0A1D8PTF4_CANAL
biological_process	GO:1901987	regulation of cell cycle phase transition	0	1	0	0.998542	0.00316993	1	0.829
biological_process	GO:0018105	peptidyl-serine phosphorylation	11	24	0.458333	0.999168	0.00326075	1	0.837	SCH9_CANAL	A0A1D8PPB9_CANAL	A0A1D8PH81_CANAL	Q5ANK2_CANAL	A0A1D8PQP3_CANAL	Q5A3L7_CANAL	A0A1D8PKB4_CANAL	Q59QB9_CANAL	A0A1D8PP50_CANAL	A0A1D8PHD2_CANAL	Q59S64_CANAL
biological_process	GO:0017148	negative regulation of translation	4	7	0.571429	0.998818	0.00340872	1	0.848	IFF8_CANAL	A0A1D8PRG1_CANAL	A0A1D8PJ46_CANAL	A0A1D8PFN4_CANAL
biological_process	GO:1900241	positive regulation of phenotypic switching	5	7	0.714286	0.999745	0.00347051	1	0.881	CZF1_CANAL	WOR1_CANAL	WOR2_CANAL	EFH1_CANAL	A0A1D8PFN2_CANAL
biological_process	GO:0000147	actin cortical patch assembly	5	7	0.714286	0.999745	0.00347051	1	0.881	PRK1_CANAL	SLA1_CANAL	PAN1_CANAL	MYO5_CANAL	A0A1D8PRF5_CANAL
biological_process	GO:0061014	positive regulation of mRNA catabolic process	2	2	1	0.998788	0.0037869	1	0.889	A0A1D8PJ46_CANAL	A0A1D8PFN4_CANAL
biological_process	GO:0007059	chromosome segregation	3	17	0.176471	0.997934	0.00396697	1	0.891	PFS2_CANAL	Q5A880_CANAL	A0A1D8PDB7_CANAL
biological_process	GO:0036177	filamentous growth of a population of unicellular organisms in response to pH	7	18	0.388889	0.99827	0.00405551	1	0.894	PACC_CANAL	PALA_CANAL	Q5ANL4_CANAL	Q5AHB5_CANAL	A0A1D8PH22_CANAL	Q59WF8_CANAL	Q59N31_CANAL
biological_process	GO:0044403	biological process involved in symbiotic interaction	0	1	0	0.997967	0.00412955	1	0.895
biological_process	GO:0000278	mitotic cell cycle	1	13	0.0769231	0.997468	0.00416609	1	0.898	Q59PZ2_CANAL
biological_process	GO:0000819	sister chromatid segregation	0	1	0	0.99785	0.00452716	1	0.906
biological_process	GO:0043328	protein transport to vacuole involved in ubiquitin-dependent protein catabolic process via the multivesicular body sorting pathway	8	16	0.5	0.999102	0.0046207	1	0.925	HSE1_CANAL	VPS27_CANAL	Q5AFA5_CANAL	A0A1D8PFX6_CANAL	A0A1D8PH22_CANAL	Q59N31_CANAL	A0A1D8PCX6_CANAL	Q5A501_CANAL
biological_process	GO:0018107	peptidyl-threonine phosphorylation	7	12	0.583333	0.999212	0.0048052	1	0.937	PRK1_CANAL	IPL1_CANAL	A0A1D8PH81_CANAL	Q5A3L7_CANAL	Q5A650_CANAL	A0A1D8PP50_CANAL	A0A1D8PHD2_CANAL
biological_process	GO:0001558	regulation of cell growth	2	3	0.666667	0.999212	0.0048052	1	0.937	CDC42_CANAL	GIN4_CANAL
biological_process	GO:0043111	replication fork arrest	4	5	0.8	0.999768	0.00526393	1	0.957	CSM3_CANAL	TOF1_CANAL	Q5A102_CANAL	A0A1D8PFM1_CANAL
biological_process	GO:0006607	NLS-bearing protein import into nucleus	4	5	0.8	0.999768	0.00526393	1	0.957	A0A1D8PS91_CANAL	A0A1D8PLY0_CANAL	A0A1D8PMU8_CANAL	A0A1D8PFQ0_CANAL
biological_process	GO:0006606	protein import into nucleus	11	36	0.305556	0.998074	0.00544111	1	0.958	Q5ANL4_CANAL	A0A1D8PEL3_CANAL	A0A1D8PM92_CANAL	A0A1D8PGB0_CANAL	A0A1D8PKH4_CANAL	A0A1D8PL86_CANAL	A0A1D8PQJ7_CANAL	Q5AH41_CANAL	A0A1D8PH86_CANAL	A0A1D8PGN9_CANAL	A0A1D8PES3_CANAL
biological_process	GO:1900436	positive regulation of filamentous growth of a population of unicellular organisms in response to starvation	10	23	0.434783	0.998574	0.00553361	1	0.96	SCH9_CANAL	STE20_CANAL	CPH1_CANAL	CRZ1_CANAL	SKN7_CANAL	NIK1_CANAL	STE7_CANAL	CLA4_CANAL	A0A1D8PJZ6_CANAL	A0A1D8PJG1_CANAL
biological_process	GO:0007010	cytoskeleton organization	4	7	0.571429	0.996611	0.00590405	1	0.96	A0A1D8PRG7_CANAL	A0A1D8PTI9_CANAL	Q59UQ6_CANAL	A0A1D8PTF4_CANAL
biological_process	GO:0030448	hyphal growth	22	69	0.318841	0.997318	0.00602812	1	0.961	SEC9_CANAL	SSN2_CANAL	CDC10_CANAL	BRE1_CANAL	CRZ1_CANAL	SLA1_CANAL	VAC8_CANAL	CDC42_CANAL	ALS1_CANAL	ALS4_CANAL	A0A1D8PRF5_CANAL	Q5A679_CANAL	Q5A936_CANAL	A0A1D8PH63_CANAL	A0A1D8PFH4_CANAL	Q5AMQ3_CANAL	Q59QN2_CANAL	A0A1D8PKB4_CANAL	Q5AKU2_CANAL	A0A1D8PNH8_CANAL	A0A1D8PK25_CANAL	A0A1D8PE85_CANAL
biological_process	GO:0007163	establishment or maintenance of cell polarity	4	16	0.25	0.997575	0.00604731	1	0.961	CLA4_CANAL	Q5AKW2_CANAL	A0A1D8PJ86_CANAL	Q59LK7_CANAL
biological_process	GO:0046578	regulation of Ras protein signal transduction	2	3	0.666667	0.998461	0.00642155	1	0.962	A0A1D8PC67_CANAL	Q5A1M1_CANAL
biological_process	GO:0007121	bipolar cellular bud site selection	3	3	1	1	0.00661055	1	0.987	CRZ1_CANAL	A0A1D8PFH4_CANAL	A0A1D8PE85_CANAL
biological_process	GO:0060963	positive regulation of ribosomal protein gene transcription by RNA polymerase II	3	3	1	1	0.00661055	1	0.987	Q5ANF0_CANAL	Q59U54_CANAL	A0A1D8PCG5_CANAL
biological_process	GO:0030307	positive regulation of cell growth	1	1	1	1	0.00661055	1	0.987	Q5A2C3_CANAL
biological_process	GO:0000956	nuclear-transcribed mRNA catabolic process	2	7	0.285714	0.996707	0.0071247	1	0.988	XRN2_CANAL	DXO_CANAL
biological_process	GO:0006625	protein targeting to peroxisome	4	5	0.8	0.998407	0.00731212	1	0.991	PEX5_CANAL	LONP2_CANAL	A0A1D8PTW0_CANAL	Q59ZE6_CANAL
biological_process	GO:0006401	RNA catabolic process	2	10	0.2	0.996155	0.00734528	1	0.991	RNY1B_CANAL	Q5A337_CANAL
biological_process	GO:0043162	ubiquitin-dependent protein catabolic process via the multivesicular body sorting pathway	0	1	0	0.998407	0.00731212	1	0.991
biological_process	GO:0000288	nuclear-transcribed mRNA catabolic process, deadenylation-dependent decay	3	5	0.6	0.997618	0.00749527	1	0.992	A0A1D8PQD2_CANAL	A0A1D8PMA5_CANAL	Q59YE8_CANAL
biological_process	GO:0044406	adhesion of symbiont to host	11	27	0.407407	0.996665	0.00999139	1	0.997	CDC10_CANAL	CARP3_CANAL	RFX2_CANAL	WOR1_CANAL	TEC1_CANAL	ALS1_CANAL	ALS4_CANAL	ADF1_CANAL	A0A1D8PD52_CANAL	Q59UR3_CANAL	A0A1D8PKY7_CANAL
biological_process	GO:0000070	mitotic sister chromatid segregation	5	11	0.454545	0.99516	0.0100948	1	0.997	A0A1D8PKA4_CANAL	A0A1D8PCM0_CANAL	A0A1D8PCF1_CANAL	Q5A5R4_CANAL	Q5A4Z1_CANAL
biological_process	GO:0000226	microtubule cytoskeleton organization	4	13	0.307692	0.995018	0.0109602	1	0.997	STU1_CANAL	A0A1D8PMG9_CANAL	A0A1D8PJ63_CANAL	A0A1D8PRN8_CANAL
biological_process	GO:0007031	peroxisome organization	3	11	0.272727	0.996665	0.00999139	1	0.997	A0A1D8PN45_CANAL	Q5AAQ7_CANAL	A0A1D8PEX2_CANAL
biological_process	GO:0019740	nitrogen utilization	3	6	0.5	0.998461	0.00807167	1	0.997	A0A1D8PU36_CANAL	A0A1D8PEG7_CANAL	A0A1D8PJF2_CANAL
biological_process	GO:0032509	endosome transport via multivesicular body sorting pathway	2	4	0.5	0.9972	0.00910155	1	0.997	A0A1D8PNJ4_CANAL	Q5A501_CANAL
biological_process	GO:0031669	cellular response to nutrient levels	1	2	0.5	0.994095	0.00910398	1	0.997	A0A1D8PH27_CANAL
biological_process	GO:0000280	nuclear division	0	5	0	0.995186	0.00862217	1	0.997
biological_process	GO:1900434	regulation of filamentous growth of a population of unicellular organisms in response to starvation	0	1	0	0.997808	0.00792043	1	0.997
biological_process	GO:0036180	filamentous growth of a population of unicellular organisms in response to biotic stimulus	58	233	0.248927	0.992485	0.0115941	1	0.998	KMO_CANAL	CZF1_CANAL	FGR41_CANAL	BRE1_CANAL	CPH1_CANAL	CRZ1_CANAL	SKN7_CANAL	SHE3_CANAL	NIK1_CANAL	SFL2_CANAL	VAC8_CANAL	TUP1_CANAL	TEC1_CANAL	CDC42_CANAL	CLA4_CANAL	A0A1D8PH81_CANAL	Q5A756_CANAL	A0A1D8PME2_CANAL	A0A1D8PHW6_CANAL	A0A1D8PQP3_CANAL	Q5A3L9_CANAL	A0A1D8PK53_CANAL	A0A1D8PQJ5_CANAL	Q59M50_CANAL	A0A1D8PNC6_CANAL	Q59UE8_CANAL	Q5A0N3_CANAL	Q5A645_CANAL	A0A1D8PRB7_CANAL	Q5A8L5_CANAL	A0A1D8PQD2_CANAL	A0A1D8PJ86_CANAL	Q5ALN5_CANAL	Q59M49_CANAL	Q59WJ8_CANAL	A0A1D8PGH4_CANAL	A0A1D8PH27_CANAL	A0A1D8PNM8_CANAL	Q5AI79_CANAL	A0A1D8PRZ6_CANAL
biological_process	GO:1900189	positive regulation of cell adhesion involved in single-species biofilm formation	10	25	0.4	0.996739	0.0110269	1	0.998	CZF1_CANAL	TRY2_CANAL	CAS5_CANAL	A0A1D8PN91_CANAL	A0A1D8PJZ6_CANAL	Q5ANI0_CANAL	Q5A5T7_CANAL	A0A1D8PEG7_CANAL	A0A1D8PND3_CANAL	A0A1D8PJ72_CANAL
biological_process	GO:0010811	positive regulation of cell-substrate adhesion	10	24	0.416667	0.996739	0.0110269	1	0.998	CZF1_CANAL	TRY2_CANAL	CAS5_CANAL	A0A1D8PN91_CANAL	A0A1D8PJZ6_CANAL	Q5ANI0_CANAL	Q5A5T7_CANAL	A0A1D8PEG7_CANAL	A0A1D8PND3_CANAL	A0A1D8PJ72_CANAL
biological_process	GO:0006298	mismatch repair	6	12	0.5	0.997241	0.01272	1	0.998	Q5A102_CANAL	A0A1D8PMZ2_CANAL	Q5ADX0_CANAL	Q59SL0_CANAL	A0A1D8PLW0_CANAL	A0A1D8PFM1_CANAL
biological_process	GO:0016558	protein import into peroxisome matrix	6	11	0.545455	0.997241	0.01272	1	0.998	PEX5_CANAL	LONP2_CANAL	A0A1D8PGB2_CANAL	A0A1D8PTW0_CANAL	A0A1D8PEX2_CANAL	Q59ZE6_CANAL
biological_process	GO:0051028	mRNA transport	4	14	0.285714	0.995338	0.0114258	1	0.998	SHE3_CANAL	A0A1D8PM92_CANAL	A0A1D8PLY0_CANAL	A0A1D8PKH4_CANAL
biological_process	GO:0036176	response to neutral pH	1	3	0.333333	0.995031	0.0111764	1	0.998	Q5A6P9_CANAL
biological_process	GO:0033036	macromolecule localization	1	1	1	0.990675	0.0125976	1	0.998	A0A1D8PLF7_CANAL
biological_process	GO:0007017	microtubule-based process	0	3	0	0.994066	0.0123406	1	0.998
biological_process	GO:0007018	microtubule-based movement	5	8	0.625	0.996252	0.013313	1	0.999	A0A1D8PKA4_CANAL	A0A1D8PK53_CANAL	A0A1D8PIP2_CANAL	A0A1D8PT88_CANAL	Q5A3K5_CANAL
biological_process	GO:0007265	Ras protein signal transduction	3	5	0.6	0.995424	0.0130859	1	0.999	RAS1_CANAL	Q5A6P9_CANAL	Q5ANJ9_CANAL
biological_process	GO:1902531	regulation of intracellular signal transduction	0	1	0	0.993906	0.013123	1	0.999
biological_process	GO:0036170	filamentous growth of a population of unicellular organisms in response to starvation	47	194	0.242268	0.969867	0.0443151	1	1	SCH9_CANAL	STE20_CANAL	KMO_CANAL	CZF1_CANAL	MP65_CANAL	FGR41_CANAL	BRE1_CANAL	CPH1_CANAL	CRZ1_CANAL	SKN7_CANAL	SHE3_CANAL	NIK1_CANAL	STE7_CANAL	TUP1_CANAL	ALO1_CANAL	CHI2_CANAL	CLA4_CANAL	Q5A756_CANAL	A0A1D8PJZ6_CANAL	A0A1D8PK53_CANAL	A0A1D8PQJ5_CANAL	Q59UE8_CANAL	Q5A0N3_CANAL	A0A1D8PMB6_CANAL	Q5A645_CANAL	Q5A8L5_CANAL	A0A1D8PQD2_CANAL	A0A1D8PJ86_CANAL	Q5ALN5_CANAL	Q59M49_CANAL	Q59WJ8_CANAL	A0A1D8PGH4_CANAL	A0A1D8PRZ6_CANAL	A0A1D8PH14_CANAL	A0A1D8PI26_CANAL	A0A1D8PSC7_CANAL	A0A1D8PLP8_CANAL	Q59WF2_CANAL	A0A1D8PTM6_CANAL	A0A1D8PNX9_CANAL
biological_process	GO:0009267	cellular response to starvation	47	197	0.238579	0.987316	0.0190415	1	1	SCH9_CANAL	STE20_CANAL	KMO_CANAL	CZF1_CANAL	FGR41_CANAL	BRE1_CANAL	CPH1_CANAL	CRZ1_CANAL	SKN7_CANAL	SHE3_CANAL	STE7_CANAL	TUP1_CANAL	ALO1_CANAL	CHI2_CANAL	CLA4_CANAL	Q5A756_CANAL	A0A1D8PJZ6_CANAL	A0A1D8PK53_CANAL	A0A1D8PQJ5_CANAL	Q59UE8_CANAL	Q5A0N3_CANAL	A0A1D8PMB6_CANAL	Q5A645_CANAL	Q5A8L5_CANAL	A0A1D8PQD2_CANAL	A0A1D8PJ86_CANAL	Q5ALN5_CANAL	Q59M49_CANAL	Q59WJ8_CANAL	A0A1D8PGH4_CANAL	A0A1D8PRZ6_CANAL	Q5A2C3_CANAL	A0A1D8PH14_CANAL	A0A1D8PI26_CANAL	A0A1D8PSC7_CANAL	A0A1D8PLP8_CANAL	Q59WF2_CANAL	A0A1D8PTM6_CANAL	A0A1D8PNX9_CANAL	A0A1D8PJG1_CANAL
biological_process	GO:0031505	fungal-type cell wall organization	24	124	0.193548	0.571507	0.518135	1	1	PGA4_CANAL	STE20_CANAL	SUN41_CANAL	CDC10_CANAL	CARP3_CANAL	CRH12_CANAL	CARP7_CANAL	PHR2_CANAL	CPH1_CANAL	STE7_CANAL	SSN8_CANAL	CAS5_CANAL	ECM33_CANAL	Q5ANK2_CANAL	Q59M50_CANAL	A0A1D8PCT0_CANAL	A0A1D8PKU6_CANAL	A0A1D8PJ86_CANAL	A0A1D8PTV3_CANAL	A0A1D8PL95_CANAL	A0A1D8PGF8_CANAL	A0A1D8PRY4_CANAL	Q59LK7_CANAL	A0A1D8PKE1_CANAL
biological_process	GO:0044011	single-species biofilm formation on inanimate substrate	23	89	0.258427	0.97533	0.0426206	1	1	RMD9_CANAL	SSN2_CANAL	CSA1_CANAL	CZF1_CANAL	TRY2_CANAL	WOR1_CANAL	TEC1_CANAL	CAS5_CANAL	A0A1D8PH81_CANAL	A0A1D8PN91_CANAL	Q5ANL4_CANAL	A0A1D8PJZ6_CANAL	Q5ANI0_CANAL	A0A1D8PN45_CANAL	Q5A5T7_CANAL	A0A1D8PTP9_CANAL	A0A1D8PJ86_CANAL	A0A1D8PEG7_CANAL	Q5AMQ5_CANAL	A0A1D8PND3_CANAL	Q59LK7_CANAL	A0A1D8PNI0_CANAL	A0A1D8PJ72_CANAL
biological_process	GO:0036178	filamentous growth of a population of unicellular organisms in response to neutral pH	18	55	0.327273	0.993889	0.013749	1	1	PACC_CANAL	RMD9_CANAL	MP65_CANAL	GDA1_CANAL	SFL2_CANAL	ALS1_CANAL	A0A1D8PH81_CANAL	A0A1D8PQJ5_CANAL	Q59M50_CANAL	A0A1D8PJ86_CANAL	A0A1D8PH27_CANAL	A0A1D8PH22_CANAL	Q59UR3_CANAL	Q5A6P9_CANAL	Q59N31_CANAL	A0A1D8PJG1_CANAL	Q59LK7_CANAL	A0A1D8PGK4_CANAL
biological_process	GO:0015031	protein transport	16	82	0.195122	0.970188	0.0398817	1	1	EXO84_CANAL	EXO70_CANAL	ATG7_CANAL	SNX41_CANAL	VTS1_CANAL	ATG2_CANAL	ATG18_CANAL	ATG20_CANAL	ATG21_CANAL	Q59LZ4_CANAL	A0A1D8PNJ4_CANAL	A0A1D8PNB2_CANAL	A0A1D8PQC5_CANAL	A0A1D8PRK4_CANAL	Q5A501_CANAL	Q5A3J5_CANAL
biological_process	GO:0006886	intracellular protein transport	16	79	0.202532	0.984005	0.0229943	1	1	Q5A679_CANAL	A0A1D8PCB4_CANAL	A0A1D8PGX7_CANAL	A0A1D8PJW1_CANAL	Q5AI79_CANAL	A0A1D8PE70_CANAL	A0A1D8PK81_CANAL	A0A1D8PPV5_CANAL	A0A1D8PMA2_CANAL	A0A1D8PK25_CANAL	Q5AGY7_CANAL	Q59MF4_CANAL	A0A1D8PNI0_CANAL	A0A1D8PN15_CANAL	A0A1D8PGP6_CANAL	Q5A8Z0_CANAL
biological_process	GO:0036244	cellular response to neutral pH	15	46	0.326087	0.992715	0.0174065	1	1	PACC_CANAL	MP65_CANAL	GDA1_CANAL	PALA_CANAL	SFL2_CANAL	ALS1_CANAL	A0A1D8PH81_CANAL	A0A1D8PQJ5_CANAL	A0A1D8PJ86_CANAL	A0A1D8PH27_CANAL	Q59UR3_CANAL	Q5A6P9_CANAL	A0A1D8PJG1_CANAL	Q59LK7_CANAL	A0A1D8PGK4_CANAL
biological_process	GO:0006897	endocytosis	15	55	0.272727	0.955285	0.0778515	1	1	SLA1_CANAL	PAN1_CANAL	CDC42_CANAL	MYO5_CANAL	A0A1D8PRF5_CANAL	A0A1D8PN45_CANAL	A0A1D8PGB7_CANAL	Q5A881_CANAL	A0A1D8PKB4_CANAL	A0A1D8PI26_CANAL	A0A1D8PGL6_CANAL	A0A1D8PTP5_CANAL	Q59S64_CANAL	A0A1D8PNI0_CANAL	A0A1D8PF53_CANAL
biological_process	GO:0000122	negative regulation of transcription by RNA polymerase II	14	38	0.368421	0.994276	0.0141061	1	1	SSN3_CANAL	GAT1_CANAL	RFX2_CANAL	SWC4_CANAL	SFU1_CANAL	TUP1_CANAL	GZF3_CANAL	EFH1_CANAL	A0A1D8PL89_CANAL	Q5ADP3_CANAL	Q5ADX0_CANAL	Q59TU4_CANAL	A0A1D8PNX9_CANAL	A0A1D8PGK8_CANAL
biological_process	GO:0051301	cell division	14	56	0.25	0.948402	0.0786695	1	1	CG24_CANAL	CD123_CANAL	STU1_CANAL	NDC80_CANAL	Q5ADM0_CANAL	A0A1D8PE86_CANAL	A0A1D8PSI8_CANAL	A0A1D8PRX3_CANAL	A0A1D8PCF1_CANAL	A0A1D8PFN5_CANAL	Q5AMH1_CANAL	Q5A4Y2_CANAL	A0A1D8PJK7_CANAL	A0A1D8PI59_CANAL
biological_process	GO:0006364	rRNA processing	12	74	0.162162	0.0457858	0.970405	1	1	RUVB2_CANAL	RRP3_CANAL	XRN2_CANAL	DBP6_CANAL	A0A1D8PM79_CANAL	A0A1D8PS68_CANAL	A0A1D8PFZ9_CANAL	A0A1D8PL61_CANAL	A0A1D8PQQ7_CANAL	A0A1D8PQ05_CANAL	A0A1D8PSF2_CANAL	A0A1D8PH70_CANAL
biological_process	GO:0034599	cellular response to oxidative stress	11	87	0.126437	0.277004	0.8033	1	1	OCA1_CANAL	RFX2_CANAL	SKN7_CANAL	ALO1_CANAL	Q5ANF0_CANAL	A0A1D8PRB7_CANAL	Q59U06_CANAL	A0A1D8PQ69_CANAL	Q5A348_CANAL	Q5AD39_CANAL	A0A1D8PPI6_CANAL
biological_process	GO:0043161	proteasome-mediated ubiquitin-dependent protein catabolic process	11	47	0.234043	0.252354	0.819846	1	1	RPN4_CANAL	Q5A3L0_CANAL	A0A1D8PGT3_CANAL	Q5AFA5_CANAL	Q59X25_CANAL	Q5A9A6_CANAL	Q5ADX0_CANAL	Q59Z65_CANAL	A0A1D8PK85_CANAL	A0A1D8PJ20_CANAL	A0A1D8PKI1_CANAL
biological_process	GO:0071555	cell wall organization	10	29	0.344828	0.868335	0.178824	1	1	MP65_CANAL	ACE2_CANAL	SLA1_CANAL	NIK1_CANAL	RBE1_CANAL	BMT2_CANAL	BMT6_CANAL	CHK1_CANAL	A0A1D8PL94_CANAL	A0A1D8PNW1_CANAL
biological_process	GO:0006623	protein targeting to vacuole	10	24	0.416667	0.973333	0.0582275	1	1	MON1_CANAL	VPS27_CANAL	BRO1_CANAL	A0A1D8PN45_CANAL	A0A1D8PH22_CANAL	A0A1D8PMH5_CANAL	Q59WF8_CANAL	Q59N31_CANAL	Q5A501_CANAL	A0A1D8PFH5_CANAL
biological_process	GO:0006511	ubiquitin-dependent protein catabolic process	10	52	0.192308	0.753244	0.312366	1	1	Q5ADM0_CANAL	A0A1D8PT11_CANAL	A0A1D8PIM4_CANAL	A0A1D8PLA6_CANAL	A0A1D8PKJ3_CANAL	Q5A9A6_CANAL	A0A1D8PGI9_CANAL	A0A1D8PCM4_CANAL	A0A1D8PPB7_CANAL	A0A1D8PRH6_CANAL
biological_process	GO:0005975	carbohydrate metabolic process	9	44	0.204545	0.44136	0.631195	1	1	MP65_CANAL	CRH12_CANAL	A0A1D8PL94_CANAL	Q5AF71_CANAL	Q59XS8_CANAL	Q5AJA6_CANAL	Q59XU9_CANAL	Q5ADV2_CANAL	A0A1D8PNW1_CANAL
biological_process	GO:0034605	cellular response to heat	9	41	0.219512	0.693097	0.442178	1	1	RFX2_CANAL	GZF3_CANAL	Q5AKW2_CANAL	A0A1D8PJZ6_CANAL	Q59M50_CANAL	A0A1D8PTP9_CANAL	A0A1D8PNM8_CANAL	Q5A6P9_CANAL	A0A1D8PGF8_CANAL
biological_process	GO:0006888	endoplasmic reticulum to Golgi vesicle-mediated transport	9	53	0.169811	0.445723	0.679206	1	1	A0A1D8PFH1_CANAL	Q5AI79_CANAL	Q5A7M1_CANAL	A0A1D8PTF1_CANAL	Q5A2K5_CANAL	A0A1D8PPV5_CANAL	A0A1D8PMA2_CANAL	Q5AGY7_CANAL	A0A1D8PTP5_CANAL
biological_process	GO:0016567	protein ubiquitination	9	30	0.3	0.863218	0.21172	1	1	A0A1D8PGT3_CANAL	Q5ALN5_CANAL	A0A1D8PRX3_CANAL	A0A1D8PKD4_CANAL	A0A1D8PLA6_CANAL	A0A1D8PKJ3_CANAL	A0A1D8PPB7_CANAL	A0A1D8PFN5_CANAL	A0A1D8PLP8_CANAL
biological_process	GO:0000398	mRNA splicing, via spliceosome	8	61	0.131148	0.574493	0.533522	1	1	PRP28_CANAL	TRY2_CANAL	A0A1D8PH71_CANAL	A0A1D8PMK6_CANAL	Q59VP9_CANAL	Q59WJ8_CANAL	A0A1D8PS92_CANAL	A0A1D8PU02_CANAL
biological_process	GO:0006325	chromatin organization	8	32	0.25	0.871753	0.170302	1	1	BRE1_CANAL	SWC5_CANAL	ATM_CANAL	EAF1_CANAL	A0A1D8PM79_CANAL	A0A1D8PKJ2_CANAL	Q5A886_CANAL	A0A1D8PGK4_CANAL
biological_process	GO:0008104	protein localization	8	12	0.666667	0.985102	0.0201049	1	1	CDC10_CANAL	EXO84_CANAL	URE2_CANAL	A0A1D8PFH4_CANAL	Q5ANJ8_CANAL	Q5A881_CANAL	A0A1D8PJZ1_CANAL	A0A1D8PE85_CANAL
biological_process	GO:0070783	growth of unicellular organism as a thread of attached cells	7	20	0.35	0.980233	0.0395119	1	1	CDC10_CANAL	WOR2_CANAL	Q5A3L9_CANAL	A0A1D8PNC6_CANAL	A0A1D8PNM8_CANAL	Q59KX3_CANAL	A0A1D8PLA4_CANAL
biological_process	GO:1900429	negative regulation of filamentous growth of a population of unicellular organisms	7	28	0.25	0.952938	0.0936512	1	1	RFX2_CANAL	SFL2_CANAL	TUP1_CANAL	A0A1D8PHD4_CANAL	A0A1D8PLL4_CANAL	A0A1D8PU74_CANAL	Q5ADP3_CANAL
biological_process	GO:0036171	filamentous growth of a population of unicellular organisms in response to chemical stimulus	7	32	0.21875	0.80253	0.330484	1	1	PACC_CANAL	SCH9_CANAL	TUP1_CANAL	Q59M50_CANAL	A0A1D8PMB6_CANAL	A0A1D8PQT9_CANAL	A0A1D8PJZ1_CANAL
biological_process	GO:0006914	autophagy	7	21	0.333333	0.911532	0.137738	1	1	MON1_CANAL	SNX41_CANAL	ATG20_CANAL	A0A1D8PMU9_CANAL	A0A1D8PQ69_CANAL	A0A1D8PGN0_CANAL	A0A1D8PUA0_CANAL
biological_process	GO:0071285	cellular response to lithium ion	7	17	0.411765	0.992688	0.0272146	1	1	PACC_CANAL	PALA_CANAL	BRO1_CANAL	GZF3_CANAL	A0A1D8PDD8_CANAL	A0A1D8PH22_CANAL	Q59N31_CANAL
biological_process	GO:0051701	biological process involved in interaction with host	7	26	0.269231	0.770231	0.329389	1	1	SEF1_CANAL	EFH1_CANAL	A0A1D8PLL4_CANAL	A0A1D8PU36_CANAL	A0A1D8PRB7_CANAL	A0A1D8PNM8_CANAL	A0A1D8PKB4_CANAL
biological_process	GO:0006260	DNA replication	7	16	0.4375	0.929307	0.108132	1	1	SLX4_CANAL	PIF1_CANAL	Q5A0N3_CANAL	A0A1D8PT08_CANAL	A0A1D8PQK7_CANAL	A0A1D8PKE9_CANAL	Q59Z33_CANAL
biological_process	GO:0006397	mRNA processing	7	28	0.25	0.861247	0.188992	1	1	PAN2_CANAL	YME2_CANAL	XRN2_CANAL	DXO_CANAL	CCM1_CANAL	A0A1D8PSJ4_CANAL	A0A1D8PH99_CANAL
biological_process	GO:0042147	retrograde transport, endosome to Golgi	7	25	0.28	0.882112	0.232303	1	1	SNX41_CANAL	A0A1D8PCB4_CANAL	A0A1D8PRW9_CANAL	A0A1D8PJW1_CANAL	Q5A881_CANAL	A0A1D8PJI6_CANAL	Q5A8Z0_CANAL
biological_process	GO:0006879	cellular iron ion homeostasis	6	38	0.157895	0.537237	0.600982	1	1	SEF1_CANAL	CSA1_CANAL	FRE1_CANAL	PMIP_CANAL	Q5AKX6_CANAL	A0A1D8PTG2_CANAL
biological_process	GO:0006887	exocytosis	6	18	0.333333	0.958746	0.0983469	1	1	SEC9_CANAL	EXO84_CANAL	EXO70_CANAL	A0A1D8PQC5_CANAL	A0A1D8PMI1_CANAL	A0A1D8PNB6_CANAL
biological_process	GO:0071280	cellular response to copper ion	6	15	0.4	0.98728	0.0463865	1	1	PACC_CANAL	TUP1_CANAL	GZF3_CANAL	Q5ANI0_CANAL	Q5AKX6_CANAL	A0A1D8PMD1_CANAL
biological_process	GO:0006412	translation	6	115	0.0521739	7.37073e-05	0.999963	0.008	1	RT09_CANAL	A0A1D8PQ89_CANAL	A0A1D8PRL2_CANAL	Q59YE8_CANAL	Q59UH8_CANAL	A0A1D8PGY8_CANAL
biological_process	GO:0044114	development of symbiont in host	6	13	0.461538	0.995195	0.0222706	1	1	SCH9_CANAL	CPH1_CANAL	TUP1_CANAL	CAS5_CANAL	CLA4_CANAL	Q59WV9_CANAL
biological_process	GO:0006310	DNA recombination	6	15	0.4	0.917106	0.128854	1	1	SLX4_CANAL	Q5A102_CANAL	A0A1D8PMZ2_CANAL	A0A1D8PL51_CANAL	Q5A5R4_CANAL	A0A1D8PF81_CANAL
biological_process	GO:0006338	chromatin remodeling	6	29	0.206897	0.730831	0.365044	1	1	RUVB2_CANAL	ARP4_CANAL	A0A1D8PJZ6_CANAL	A0A1D8PLL0_CANAL	A0A1D8PLN0_CANAL	A0A1D8PG88_CANAL
biological_process	GO:0043486	histone exchange	6	12	0.5	0.992688	0.0272146	1	1	RUVB2_CANAL	SWC4_CANAL	SWR1_CANAL	ARP6_CANAL	A0A1D8PH76_CANAL	A0A1D8PL97_CANAL
biological_process	GO:0006906	vesicle fusion	6	15	0.4	0.974122	0.0642814	1	1	SEC9_CANAL	A0A1D8PJW1_CANAL	Q5AI79_CANAL	A0A1D8PK25_CANAL	Q5AGY7_CANAL	A0A1D8PNI0_CANAL
biological_process	GO:0007052	mitotic spindle organization	6	19	0.315789	0.958825	0.089633	1	1	IPL1_CANAL	A0A1D8PKA4_CANAL	Q5AMH1_CANAL	A0A1D8PT88_CANAL	A0A1D8PTZ8_CANAL	Q5ALU4_CANAL
biological_process	GO:0051321	meiotic cell cycle	6	17	0.352941	0.970094	0.0501362	1	1	CSM3_CANAL	TOF1_CANAL	SWE1_CANAL	A0A1D8PRN4_CANAL	Q59PZ2_CANAL	A0A1D8PDX4_CANAL
biological_process	GO:0016973	poly(A)+ mRNA export from nucleus	6	17	0.352941	0.972785	0.0822205	1	1	MEX67_CANAL	A0A1D8PGB0_CANAL	A0A1D8PRZ6_CANAL	A0A1D8PQE5_CANAL	A0A1D8PIF1_CANAL	A0A1D8PKD8_CANAL
biological_process	GO:0016192	vesicle-mediated transport	6	43	0.139535	0.970755	0.040491	1	1	MON1_CANAL	A0A1D8PNB2_CANAL	A0A1D8PQ69_CANAL	A0A1D8PJI6_CANAL	Q59MF4_CANAL	A0A1D8PFI0_CANAL
biological_process	GO:0043619	regulation of transcription from RNA polymerase II promoter in response to oxidative stress	6	12	0.5	0.995195	0.0222706	1	1	MNL1_CANAL	SKN7_CANAL	A0A1D8PM95_CANAL	A0A1D8PGE6_CANAL	A0A1D8PLA9_CANAL	A0A1D8PEH3_CANAL
biological_process	GO:0000480	endonucleolytic cleavage in 5'-ETS of tricistronic rRNA transcript (SSU-rRNA, 5.8S rRNA, LSU-rRNA)	6	16	0.375	0.980981	0.0628067	1	1	UTP10_CANAL	Q5A756_CANAL	A0A1D8PI20_CANAL	A0A1D8PNG5_CANAL	Q59UH8_CANAL	Q5ANE4_CANAL
biological_process	GO:0000472	endonucleolytic cleavage to generate mature 5'-end of SSU-rRNA from (SSU-rRNA, 5.8S rRNA, LSU-rRNA)	6	17	0.352941	0.972785	0.0822205	1	1	UTP10_CANAL	Q5A756_CANAL	A0A1D8PI20_CANAL	A0A1D8PNG5_CANAL	Q59UH8_CANAL	Q5ANE4_CANAL
biological_process	GO:0006406	mRNA export from nucleus	6	17	0.352941	0.993837	0.016862	1	1	Q5ANL4_CANAL	A0A1D8PH99_CANAL	A0A1D8PEU5_CANAL	A0A1D8PL86_CANAL	A0A1D8PGL7_CANAL	A0A1D8PRR9_CANAL
biological_process	GO:0001410	chlamydospore formation	5	17	0.294118	0.917779	0.201481	1	1	PACC_CANAL	SCH9_CANAL	STE20_CANAL	CDC10_CANAL	CLA4_CANAL
biological_process	GO:0007015	actin filament organization	5	22	0.227273	0.641923	0.496863	1	1	PRK1_CANAL	MYO5_CANAL	A0A1D8PRF5_CANAL	Q5AKW2_CANAL	A0A1D8PGB7_CANAL
biological_process	GO:0016573	histone acetylation	5	16	0.3125	0.868067	0.229078	1	1	RUVB2_CANAL	A0A1D8PU74_CANAL	A0A1D8PKJ2_CANAL	A0A1D8PU33_CANAL	Q5A886_CANAL
biological_process	GO:0036166	phenotypic switching	5	25	0.2	0.80253	0.330484	1	1	CZF1_CANAL	WOR1_CANAL	WOR2_CANAL	TUP1_CANAL	EFH1_CANAL
biological_process	GO:0006368	transcription elongation from RNA polymerase II promoter	5	33	0.151515	0.344473	0.787981	1	1	SPT16_CANAL	CCR4_CANAL	SKN7_CANAL	Q5A8Y5_CANAL	A0A1D8PHD2_CANAL
biological_process	GO:0000462	maturation of SSU-rRNA from tricistronic rRNA transcript (SSU-rRNA, 5.8S rRNA, LSU-rRNA)	5	35	0.142857	0.537237	0.600982	1	1	RRP36_CANAL	UTP10_CANAL	A0A1D8PQQ7_CANAL	Q5AJA5_CANAL	A0A1D8PPJ3_CANAL
biological_process	GO:0009272	fungal-type cell wall biogenesis	5	27	0.185185	0.543598	0.588844	1	1	GDA1_CANAL	Q5ANK2_CANAL	Q5A8L5_CANAL	A0A1D8PL89_CANAL	A0A1D8PNI0_CANAL
biological_process	GO:0000422	autophagy of mitochondrion	5	17	0.294118	0.842522	0.31776	1	1	ATG7_CANAL	ATG2_CANAL	ATG18_CANAL	ATG21_CANAL	A0A1D8PGN0_CANAL
biological_process	GO:0006369	termination of RNA polymerase II transcription	5	10	0.5	0.98579	0.0572663	1	1	CFT1_CANAL	MED18_CANAL	A0A1D8PPQ9_CANAL	A0A1D8PN05_CANAL	A0A1D8PHH9_CANAL
biological_process	GO:0006891	intra-Golgi vesicle-mediated transport	5	23	0.217391	0.746672	0.439835	1	1	A0A1D8PD25_CANAL	A0A1D8PJW1_CANAL	Q5AI79_CANAL	A0A1D8PPV5_CANAL	A0A1D8PTP5_CANAL
biological_process	GO:0000447	endonucleolytic cleavage in ITS1 to separate SSU-rRNA from 5.8S rRNA and LSU-rRNA from tricistronic rRNA transcript (SSU-rRNA, 5.8S rRNA, LSU-rRNA)	5	21	0.238095	0.812457	0.358453	1	1	UTP10_CANAL	Q5A756_CANAL	A0A1D8PI20_CANAL	Q59UH8_CANAL	Q5ANE4_CANAL
biological_process	GO:0007124	pseudohyphal growth	5	12	0.416667	0.992688	0.0272146	1	1	CPH1_CANAL	EFH1_CANAL	A0A1D8PFH4_CANAL	A0A1D8PE85_CANAL	A0A1D8PJG1_CANAL
biological_process	GO:0000902	cell morphogenesis	5	16	0.3125	0.84987	0.253749	1	1	CDC42_CANAL	Q5AKW2_CANAL	A0A1D8PJZ6_CANAL	A0A1D8PJ86_CANAL	Q5A6P9_CANAL
biological_process	GO:0006367	transcription initiation from RNA polymerase II promoter	5	25	0.2	0.739054	0.384137	1	1	Q59M53_CANAL	Q5A8Y5_CANAL	Q5AHZ3_CANAL	A0A1D8PSS1_CANAL	Q5A886_CANAL
biological_process	GO:0006631	fatty acid metabolic process	5	12	0.416667	0.275283	0.820422	1	1	PEX5_CANAL	A0A1D8PIW1_CANAL	A0A1D8PTW0_CANAL	Q59ZE6_CANAL	Q59TU5_CANAL
biological_process	GO:0000077	DNA damage checkpoint signaling	5	11	0.454545	0.967843	0.0807798	1	1	ATM_CANAL	A0A1D8PQT9_CANAL	A0A1D8PF46_CANAL	A0A1D8PNH8_CANAL	A0A1D8PJZ1_CANAL
biological_process	GO:0006896	Golgi to vacuole transport	5	14	0.357143	0.96708	0.104816	1	1	A0A1D8PJW1_CANAL	A0A1D8PCX6_CANAL	A0A1D8PK25_CANAL	A0A1D8PFH5_CANAL	A0A1D8PNI0_CANAL
biological_process	GO:0000724	double-strand break repair via homologous recombination	5	21	0.238095	0.84987	0.253749	1	1	Q59UE8_CANAL	A0A1D8PKE9_CANAL	Q59Z33_CANAL	Q5A5N2_CANAL	Q5A5R4_CANAL
biological_process	GO:0006302	double-strand break repair	5	13	0.384615	0.949953	0.0885494	1	1	A0A1D8PQM0_CANAL	A0A1D8PSG1_CANAL	Q5AA15_CANAL	Q5ALY1_CANAL	A0A1D8PSI5_CANAL
biological_process	GO:0006289	nucleotide-excision repair	5	16	0.3125	0.777586	0.361361	1	1	Q59M53_CANAL	A0A1D8PFW0_CANAL	Q5ADX0_CANAL	A0A1D8PLW0_CANAL	Q59Z33_CANAL
biological_process	GO:0000002	mitochondrial genome maintenance	4	20	0.2	0.641547	0.575834	1	1	MMM1_CANAL	PIF1_CANAL	YME2_CANAL	A0A1D8PSJ4_CANAL
biological_process	GO:1900233	positive regulation of single-species biofilm formation on inanimate substrate	4	11	0.363636	0.960674	0.135053	1	1	SSN2_CANAL	A0A1D8PJ86_CANAL	A0A1D8PGF8_CANAL	Q59LK7_CANAL
biological_process	GO:0000920	septum digestion after cytokinesis	4	18	0.222222	0.68224	0.534428	1	1	CDC42_CANAL	A0A1D8PK53_CANAL	A0A1D8PJ86_CANAL	Q59LK7_CANAL
biological_process	GO:0006378	mRNA polyadenylation	4	14	0.285714	0.953614	0.13403	1	1	PFS2_CANAL	CFT1_CANAL	A0A1D8PPQ9_CANAL	A0A1D8PHH9_CANAL
biological_process	GO:0006506	GPI anchor biosynthetic process	4	26	0.153846	0.28142	0.860888	1	1	A0A1D8PHD4_CANAL	Q5AGD9_CANAL	A0A1D8PGZ7_CANAL	A0A1D8PRY4_CANAL
biological_process	GO:0044409	entry into host	4	10	0.4	0.960674	0.135053	1	1	PACC_CANAL	PALA_CANAL	TUP1_CANAL	ALS1_CANAL
biological_process	GO:0071469	cellular response to alkaline pH	4	16	0.25	0.833595	0.353347	1	1	PACC_CANAL	SEF1_CANAL	A0A1D8PH22_CANAL	Q59N31_CANAL
biological_process	GO:0006457	protein folding	4	44	0.0909091	0.0184399	0.993189	0.987	1	A0A1D8PJ63_CANAL	A0A1D8PF30_CANAL	A0A1D8PU06_CANAL	A0A1D8PLN3_CANAL
biological_process	GO:0036168	filamentous growth of a population of unicellular organisms in response to heat	4	17	0.235294	0.798519	0.400075	1	1	Q5AKW2_CANAL	A0A1D8PJZ6_CANAL	Q5A6P9_CANAL	A0A1D8PJG1_CANAL
biological_process	GO:1900239	regulation of phenotypic switching	4	13	0.307692	0.984015	0.0500692	1	1	CZF1_CANAL	WOR1_CANAL	Q5A645_CANAL	Q5ADX8_CANAL
biological_process	GO:1990277	parasexual conjugation with cellular fusion	4	7	0.571429	0.996529	0.0267443	1	1	STE20_CANAL	CPH1_CANAL	STE7_CANAL	WOR1_CANAL
biological_process	GO:0009306	protein secretion	4	19	0.210526	0.812457	0.358453	1	1	SEC9_CANAL	A0A1D8PFX6_CANAL	A0A1D8PRI9_CANAL	A0A1D8PNI0_CANAL
biological_process	GO:0032968	positive regulation of transcription elongation from RNA polymerase II promoter	4	21	0.190476	0.60071	0.615066	1	1	SPT16_CANAL	CCR4_CANAL	A0A1D8PRG1_CANAL	A0A1D8PHD2_CANAL
biological_process	GO:0070816	phosphorylation of RNA polymerase II C-terminal domain	4	11	0.363636	0.96708	0.104816	1	1	SSN3_CANAL	Q59M53_CANAL	Q59T89_CANAL	A0A1D8PHD2_CANAL
biological_process	GO:0000079	regulation of cyclin-dependent protein serine/threonine kinase activity	4	15	0.266667	0.833595	0.353347	1	1	CG24_CANAL	A0A1D8PDW6_CANAL	A0A1D8PH53_CANAL	Q59T89_CANAL
biological_process	GO:0000463	maturation of LSU-rRNA from tricistronic rRNA transcript (SSU-rRNA, 5.8S rRNA, LSU-rRNA)	4	24	0.166667	0.373421	0.799682	1	1	SPB1_CANAL	HAS1_CANAL	A0A1D8PE47_CANAL	Q5AJA5_CANAL
biological_process	GO:1900231	regulation of single-species biofilm formation on inanimate substrate	4	18	0.222222	0.921668	0.162568	1	1	CZF1_CANAL	CPH1_CANAL	WOR1_CANAL	TEC1_CANAL
biological_process	GO:0007005	mitochondrion organization	4	18	0.222222	0.105941	0.926623	1	1	A0A1D8PMH5_CANAL	Q59WV9_CANAL	A0A1D8PMA5_CANAL	Q5AND0_CANAL
biological_process	GO:0000350	generation of catalytic spliceosome for second transesterification step	4	7	0.571429	0.996529	0.0267443	1	1	ISY1_CANAL	Q5A322_CANAL	A0A1D8PP74_CANAL	A0A1D8PS92_CANAL
biological_process	GO:0036187	cell growth mode switching, budding to filamentous	4	13	0.307692	0.920861	0.216083	1	1	GDA1_CANAL	CDC42_CANAL	Q5AKW2_CANAL	Q5A6P9_CANAL
biological_process	GO:0043967	histone H4 acetylation	4	18	0.222222	0.761247	0.446167	1	1	SWC4_CANAL	ARP4_CANAL	EAF1_CANAL	A0A1D8PPL1_CANAL
biological_process	GO:0000076	DNA replication checkpoint signaling	4	6	0.666667	0.995195	0.0222706	1	1	CCR4_CANAL	CSM3_CANAL	TOF1_CANAL	A0A1D8PF47_CANAL
biological_process	GO:0000289	nuclear-transcribed mRNA poly(A) tail shortening	4	8	0.5	0.991574	0.039326	1	1	CCR4_CANAL	PAN2_CANAL	VTS1_CANAL	A0A1D8PRG1_CANAL
biological_process	GO:0006508	proteolysis	4	21	0.190476	0.422871	0.639956	1	1	CARP3_CANAL	PMIP_CANAL	A0A1D8PQC4_CANAL	A0A1D8PDN2_CANAL
biological_process	GO:0000750	pheromone-dependent signal transduction involved in conjugation with cellular fusion	4	12	0.333333	0.937193	0.166405	1	1	CDC42_CANAL	A0A1D8PH43_CANAL	A0A1D8PQH4_CANAL	A0A1D8PNF8_CANAL
biological_process	GO:0006893	Golgi to plasma membrane transport	4	11	0.363636	0.812457	0.358453	1	1	EXO84_CANAL	A0A1D8PQC5_CANAL	A0A1D8PMI1_CANAL	A0A1D8PNB6_CANAL
biological_process	GO:0008652	cellular amino acid biosynthetic process	4	9	0.444444	0.0811553	0.95367	1	1	HAL21_CANAL	HAL22_CANAL	ARO1_CANAL	A0A1D8PQT9_CANAL
biological_process	GO:0046854	phosphatidylinositol phosphate biosynthetic process	4	8	0.5	0.992172	0.0456604	1	1	HAL21_CANAL	HAL22_CANAL	A0A1D8PGH4_CANAL	Q59KK0_CANAL
biological_process	GO:0000184	nuclear-transcribed mRNA catabolic process, nonsense-mediated decay	4	12	0.333333	0.812457	0.358453	1	1	A0A1D8PTQ2_CANAL	A0A1D8PL84_CANAL	A0A1D8PT99_CANAL	Q5A3J3_CANAL
biological_process	GO:0006808	regulation of nitrogen utilization	4	5	0.8	0.996529	0.0267443	1	1	GAT1_CANAL	URE2_CANAL	A0A1D8PNX9_CANAL	A0A1D8PDY7_CANAL
biological_process	GO:0030036	actin cytoskeleton organization	4	12	0.333333	0.368379	0.734483	1	1	SLA1_CANAL	A0A1D8PN45_CANAL	A0A1D8PRQ6_CANAL	A0A1D8PI26_CANAL
biological_process	GO:0007094	mitotic spindle assembly checkpoint signaling	4	14	0.285714	0.917779	0.201481	1	1	A0A1D8PPB7_CANAL	A0A1D8PQB7_CANAL	Q59S64_CANAL	A0A1D8PGP6_CANAL
biological_process	GO:0051123	RNA polymerase II preinitiation complex assembly	4	16	0.25	0.825439	0.324267	1	1	Q5A350_CANAL	A0A1D8PKJ2_CANAL	Q5A886_CANAL	A0A1D8PSN1_CANAL
biological_process	GO:0055085	transmembrane transport	4	27	0.148148	1.4496e-05	0.999994	0	1	A0A1D8PKI5_CANAL	A0A1D8PEJ7_CANAL	A0A1D8PNM6_CANAL	A0A1D8PGN3_CANAL
biological_process	GO:1900442	positive regulation of filamentous growth of a population of unicellular organisms in response to neutral pH	4	13	0.307692	0.920861	0.216083	1	1	Q59UR3_CANAL	Q5A6P9_CANAL	A0A1D8PJG1_CANAL	A0A1D8PGK4_CANAL
biological_process	GO:0006470	protein dephosphorylation	4	23	0.173913	0.397587	0.746306	1	1	A0A1D8PU75_CANAL	Q59U06_CANAL	Q59Q44_CANAL	A0A1D8PRZ8_CANAL
biological_process	GO:0000710	meiotic mismatch repair	4	8	0.5	0.992172	0.0456604	1	1	Q5AA15_CANAL	Q5A102_CANAL	Q59SL0_CANAL	A0A1D8PFM1_CANAL
biological_process	GO:0000011	vacuole inheritance	4	9	0.444444	0.985087	0.0702581	1	1	VAC8_CANAL	A0A1D8PGH4_CANAL	Q5AI79_CANAL	A0A1D8PK25_CANAL
biological_process	GO:0031145	anaphase-promoting complex-dependent catabolic process	4	14	0.285714	0.895184	0.26059	1	1	A0A1D8PE86_CANAL	A0A1D8PRX3_CANAL	A0A1D8PCA6_CANAL	A0A1D8PFN5_CANAL
biological_process	GO:0010499	proteasomal ubiquitin-independent protein catabolic process	4	15	0.266667	0.86597	0.306612	1	1	A0A1D8PRH6_CANAL	Q59Z65_CANAL	A0A1D8PK85_CANAL	A0A1D8PJ20_CANAL
biological_process	GO:0090630	activation of GTPase activity	4	9	0.444444	0.985087	0.0702581	1	1	Q5A679_CANAL	A0A1D8PK81_CANAL	A0A1D8PN15_CANAL	A0A1D8PGP6_CANAL
biological_process	GO:0042790	nucleolar large rRNA transcription by RNA polymerase I	4	17	0.235294	0.798519	0.400075	1	1	A0A1D8PT86_CANAL	A0A1D8PQM4_CANAL	A0A1D8PMH3_CANAL	A0A1D8PH70_CANAL
biological_process	GO:0010498	proteasomal protein catabolic process	4	13	0.307692	0.270212	0.80211	1	1	A0A1D8PRH6_CANAL	Q59Z65_CANAL	A0A1D8PK85_CANAL	A0A1D8PJ20_CANAL
biological_process	GO:0045333	cellular respiration	4	16	0.25	0.00393235	0.998508	0.62	1	A0A1D8PQV0_CANAL	A0A1D8PD60_CANAL	Q5AMQ5_CANAL	A0A1D8PNE8_CANAL
biological_process	GO:0045040	protein insertion into mitochondrial outer membrane	3	12	0.25	0.826054	0.398444	1	1	MMM1_CANAL	A0A1D8PKC1_CANAL	A0A1D8PEX2_CANAL
biological_process	GO:0016485	protein processing	3	11	0.272727	0.522817	0.62949	1	1	LONP2_CANAL	Q5AHB5_CANAL	A0A1D8PSZ5_CANAL
biological_process	GO:0044416	induction by symbiont of host defense response	3	19	0.157895	0.68224	0.534428	1	1	PACC_CANAL	MP65_CANAL	ALS1_CANAL
biological_process	GO:1900439	positive regulation of filamentous growth of a population of unicellular organisms in response to chemical stimulus	3	11	0.272727	0.864947	0.34232	1	1	PACC_CANAL	A0A1D8PQT9_CANAL	A0A1D8PJZ1_CANAL
biological_process	GO:0036297	interstrand cross-link repair	3	8	0.375	0.960674	0.135053	1	1	MPH1_CANAL	Q5A102_CANAL	A0A1D8PFM1_CANAL
biological_process	GO:0046777	protein autophosphorylation	3	9	0.333333	0.899757	0.285793	1	1	PRK1_CANAL	A0A1D8PQT9_CANAL	A0A1D8PHD2_CANAL
biological_process	GO:0007030	Golgi organization	3	14	0.214286	0.711663	0.479702	1	1	A0A1D8PTF1_CANAL	Q5A2K5_CANAL	A0A1D8PD30_CANAL
biological_process	GO:0006261	DNA-dependent DNA replication	3	13	0.230769	0.713268	0.381912	1	1	SPT16_CANAL	A0A1D8PCY7_CANAL	A0A1D8PQP2_CANAL
biological_process	GO:0008643	carbohydrate transport	3	21	0.142857	0.177833	0.930198	1	1	SSN2_CANAL	A0A1D8PQJ5_CANAL	Q5AK39_CANAL
biological_process	GO:0006268	DNA unwinding involved in DNA replication	3	10	0.3	0.899757	0.285793	1	1	PIF1_CANAL	Q5A5R4_CANAL	A0A1D8PFE6_CANAL
biological_process	GO:0000727	double-strand break repair via break-induced replication	3	14	0.214286	0.73941	0.50567	1	1	PIF1_CANAL	A0A1D8PHD2_CANAL	A0A1D8PFE6_CANAL
biological_process	GO:0007118	budding cell apical bud growth	3	7	0.428571	0.95434	0.176838	1	1	CDC42_CANAL	A0A1D8PE85_CANAL	Q59LK7_CANAL
biological_process	GO:0006487	protein N-linked glycosylation	3	36	0.0833333	0.0148837	0.996199	0.97	1	GDA1_CANAL	Q5A348_CANAL	A0A1D8PTC1_CANAL
biological_process	GO:0000466	maturation of 5.8S rRNA from tricistronic rRNA transcript (SSU-rRNA, 5.8S rRNA, LSU-rRNA)	3	11	0.272727	0.613041	0.533963	1	1	SPB1_CANAL	A0A1D8PE47_CANAL	Q5AJA5_CANAL
biological_process	GO:0006486	protein glycosylation	3	19	0.157895	0.00806417	0.996903	0.839	1	GDA1_CANAL	Q5A1A4_CANAL	Q5AHE5_CANAL
biological_process	GO:0007064	mitotic sister chromatid cohesion	3	11	0.272727	0.86597	0.306612	1	1	A0A1D8PF12_CANAL	A0A1D8PSI8_CANAL	A0A1D8PJK7_CANAL
biological_process	GO:0000045	autophagosome assembly	3	15	0.2	0.91922	0.174561	1	1	ATG7_CANAL	ATG2_CANAL	A0A1D8PLM0_CANAL
biological_process	GO:0006995	cellular response to nitrogen starvation	3	10	0.3	0.864947	0.34232	1	1	ATG7_CANAL	A0A1D8PJF2_CANAL	A0A1D8PLM0_CANAL
biological_process	GO:0006878	cellular copper ion homeostasis	3	14	0.214286	0.73941	0.50567	1	1	ALS1_CANAL	Q5AKX6_CANAL	A0A1D8PJG1_CANAL
biological_process	GO:0008608	attachment of spindle microtubules to kinetochore	3	8	0.375	0.97545	0.0652205	1	1	IPL1_CANAL	Q5AMH1_CANAL	Q5ALU4_CANAL
biological_process	GO:0006665	sphingolipid metabolic process	3	7	0.428571	0.484189	0.673538	1	1	Q5A3L3_CANAL	A0A1D8PFW9_CANAL	Q5AMG6_CANAL
biological_process	GO:0016197	endosomal transport	3	11	0.272727	0.992723	0.0150891	1	1	SLA1_CANAL	PAN1_CANAL	A0A1D8PF53_CANAL
biological_process	GO:0006635	fatty acid beta-oxidation	3	13	0.230769	0.553833	0.685192	1	1	PEX5_CANAL	Q5AAQ7_CANAL	Q5AMQ5_CANAL
biological_process	GO:0007097	nuclear migration	3	7	0.428571	0.962488	0.104575	1	1	CDC10_CANAL	Q5AKW2_CANAL	A0A1D8PK53_CANAL
biological_process	GO:0046855	inositol phosphate dephosphorylation	3	6	0.5	0.973256	0.127646	1	1	HAL21_CANAL	HAL22_CANAL	A0A1D8PQN8_CANAL
biological_process	GO:0000103	sulfate assimilation	3	5	0.6	0.996529	0.0267443	1	1	HAL21_CANAL	HAL22_CANAL	A0A1D8PHL8_CANAL
biological_process	GO:0006541	glutamine metabolic process	3	14	0.214286	0.646653	0.60207	1	1	Q59MZ5_CANAL	A0A1D8PDN2_CANAL	A0A1D8PRE9_CANAL
biological_process	GO:0000132	establishment of mitotic spindle orientation	3	6	0.5	0.986555	0.0844026	1	1	A0A1D8PK53_CANAL	A0A1D8PSM7_CANAL	Q5A880_CANAL
biological_process	GO:0042144	vacuole fusion, non-autophagic	3	13	0.230769	0.949931	0.129731	1	1	A0A1D8PJW1_CANAL	Q5AI79_CANAL	A0A1D8PI26_CANAL
biological_process	GO:0034497	protein localization to phagophore assembly site	3	7	0.428571	0.973256	0.127646	1	1	ATG18_CANAL	ATG21_CANAL	A0A1D8PFH1_CANAL
biological_process	GO:0033962	P-body assembly	3	6	0.5	0.992172	0.0456604	1	1	A0A1D8PM60_CANAL	A0A1D8PM93_CANAL	Q5AAR2_CANAL
biological_process	GO:0034063	stress granule assembly	3	6	0.5	0.986555	0.0844026	1	1	Q5ANK2_CANAL	A0A1D8PM93_CANAL	Q5AAR2_CANAL
biological_process	GO:0045892	negative regulation of transcription, DNA-templated	3	9	0.333333	0.97948	0.0357222	1	1	TUP1_CANAL	UPC2_CANAL	A0A1D8PH70_CANAL
biological_process	GO:0034727	piecemeal microautophagy of the nucleus	3	14	0.214286	0.86597	0.306612	1	1	ATG7_CANAL	ATG2_CANAL	ATG15_CANAL
biological_process	GO:0034644	cellular response to UV	3	7	0.428571	0.937193	0.166405	1	1	RFX2_CANAL	Q5AA15_CANAL	A0A1D8PLU8_CANAL
biological_process	GO:0007029	endoplasmic reticulum organization	3	4	0.75	0.767697	0.397455	1	1	Q5ALW4_CANAL	A0A1D8PTF1_CANAL	Q5A2K5_CANAL
biological_process	GO:0006312	mitotic recombination	3	8	0.375	0.917684	0.187543	1	1	A0A1D8PI62_CANAL	Q5AA15_CANAL	Q5AJ72_CANAL
biological_process	GO:0016575	histone deacetylation	3	11	0.272727	0.599925	0.645355	1	1	SET2_CANAL	A0A1D8PHC7_CANAL	A0A1D8PJR4_CANAL
biological_process	GO:0090307	mitotic spindle assembly	3	6	0.5	0.985087	0.0702581	1	1	STU1_CANAL	A0A1D8PMU9_CANAL	A0A1D8PT88_CANAL
biological_process	GO:0045943	positive regulation of transcription by RNA polymerase I	3	4	0.75	0.986555	0.0844026	1	1	UTP10_CANAL	Q5A5P9_CANAL	A0A1D8PPJ3_CANAL
biological_process	GO:0016560	protein import into peroxisome matrix, docking	3	6	0.5	0.986555	0.0844026	1	1	PEX5_CANAL	A0A1D8PPS0_CANAL	A0A1D8PTW0_CANAL
biological_process	GO:0043087	regulation of GTPase activity	3	7	0.428571	0.986687	0.0400639	1	1	IQG1_CANAL	Q5AMQ3_CANAL	A0A1D8PLJ2_CANAL
biological_process	GO:0006270	DNA replication initiation	3	22	0.136364	0.393865	0.770242	1	1	Q5AJC3_CANAL	A0A1D8PJZ1_CANAL	A0A1D8PHD2_CANAL
biological_process	GO:0000209	protein polyubiquitination	3	26	0.115385	0.459645	0.71858	1	1	A0A1D8PGT3_CANAL	Q59X25_CANAL	Q5A3M5_CANAL
biological_process	GO:0070785	negative regulation of growth of unicellular organism as a thread of attached cells	3	5	0.6	0.929742	0.230128	1	1	WOR2_CANAL	A0A1D8PNC6_CANAL	A0A1D8PNM8_CANAL
biological_process	GO:0070914	UV-damage excision repair	3	7	0.428571	0.929742	0.230128	1	1	Q5AA15_CANAL	A0A1D8PFW0_CANAL	A0A1D8PQP2_CANAL
biological_process	GO:0006513	protein monoubiquitination	3	10	0.3	0.942734	0.173946	1	1	Q59X25_CANAL	A0A1D8PGB2_CANAL	Q5A3M5_CANAL
biological_process	GO:0032889	regulation of vacuole fusion, non-autophagic	3	6	0.5	0.986555	0.0844026	1	1	CDC42_CANAL	Q5AI78_CANAL	A0A1D8PRI2_CANAL
biological_process	GO:0000723	telomere maintenance	3	17	0.176471	0.668258	0.485529	1	1	ATM_CANAL	A0A1D8PDJ8_CANAL	A0A1D8PF81_CANAL
biological_process	GO:0051382	kinetochore assembly	3	6	0.5	0.996529	0.0267443	1	1	ARP4_CANAL	A0A1D8PTC7_CANAL	A0A1D8PDB7_CANAL
biological_process	GO:0030242	autophagy of peroxisome	3	7	0.428571	0.95434	0.176838	1	1	ATG2_CANAL	Q5ANK2_CANAL	A0A1D8PFH1_CANAL
biological_process	GO:0032958	inositol phosphate biosynthetic process	3	4	0.75	0.998762	0.0227279	1	1	A0A1D8PMU9_CANAL	Q59YE9_CANAL	Q59KK0_CANAL
biological_process	GO:0034501	protein localization to kinetochore	3	7	0.428571	0.973256	0.127646	1	1	A0A1D8PTC7_CANAL	A0A1D8PRR9_CANAL	A0A1D8PQB7_CANAL
biological_process	GO:0006890	retrograde vesicle-mediated transport, Golgi to endoplasmic reticulum	3	22	0.136364	0.384934	0.811148	1	1	Q5A7M1_CANAL	A0A1D8PPV5_CANAL	A0A1D8PRK4_CANAL
biological_process	GO:1900433	positive regulation of filamentous growth of a population of unicellular organisms in response to heat	3	5	0.6	0.994736	0.0489238	1	1	A0A1D8PJZ6_CANAL	Q5A6P9_CANAL	A0A1D8PJG1_CANAL
biological_process	GO:0016579	protein deubiquitination	3	20	0.15	0.520298	0.686408	1	1	A0A1D8PIM4_CANAL	A0A1D8PGI9_CANAL	A0A1D8PCM4_CANAL
biological_process	GO:0007039	protein catabolic process in the vacuole	3	6	0.5	0.986555	0.0844026	1	1	A0A1D8PGA2_CANAL	A0A1D8PNQ9_CANAL	A0A1D8PJE0_CANAL
biological_process	GO:0006895	Golgi to endosome transport	3	7	0.428571	0.95434	0.176838	1	1	A0A1D8PCX6_CANAL	A0A1D8PGL6_CANAL	A0A1D8PFH5_CANAL
biological_process	GO:0016925	protein sumoylation	3	8	0.375	0.95434	0.176838	1	1	Q5A339_CANAL	Q5A645_CANAL	A0A1D8PCK0_CANAL
biological_process	GO:0006999	nuclear pore organization	3	6	0.5	0.973256	0.127646	1	1	A0A1D8PS91_CANAL	A0A1D8PLY0_CANAL	A0A1D8PFQ0_CANAL
biological_process	GO:0045053	protein retention in Golgi apparatus	3	7	0.428571	0.973256	0.127646	1	1	A0A1D8PN45_CANAL	A0A1D8PMH5_CANAL	Q5A501_CANAL
biological_process	GO:0070786	positive regulation of growth of unicellular organism as a thread of attached cells	3	7	0.428571	0.991574	0.039326	1	1	Q5A3L9_CANAL	Q59KX3_CANAL	A0A1D8PLA4_CANAL
biological_process	GO:0072583	clathrin-dependent endocytosis	3	7	0.428571	0.95434	0.176838	1	1	A0A1D8PL36_CANAL	A0A1D8PE70_CANAL	A0A1D8PTM6_CANAL
biological_process	GO:0007062	sister chromatid cohesion	3	7	0.428571	0.948063	0.117888	1	1	Q59UE8_CANAL	A0A1D8PSI8_CANAL	A0A1D8PQP2_CANAL
biological_process	GO:0006405	RNA export from nucleus	3	6	0.5	0.982593	0.0380953	1	1	A0A1D8PEL3_CANAL	A0A1D8PKH4_CANAL	A0A1D8PQE5_CANAL
biological_process	GO:0051641	cellular localization	3	4	0.75	0.955364	0.0559319	1	1	A0A1D8PN92_CANAL	A0A1D8PRB9_CANAL	Q5ANF9_CANAL
biological_process	GO:0007091	metaphase/anaphase transition of mitotic cell cycle	3	5	0.6	0.905894	0.187463	1	1	A0A1D8PRX3_CANAL	A0A1D8PCA6_CANAL	A0A1D8PFN5_CANAL
biological_process	GO:0010608	posttranscriptional regulation of gene expression	3	3	1	0.987643	0.0220903	1	1	A0A1D8PJ46_CANAL	A0A1D8PMA5_CANAL	A0A1D8PFN4_CANAL
biological_process	GO:0034411	cell wall (1->3)-beta-D-glucan biosynthetic process	2	5	0.4	0.951076	0.238024	1	1	PGA4_CANAL	PHR2_CANAL
biological_process	GO:0071970	fungal-type cell wall (1->3)-beta-D-glucan biosynthetic process	2	5	0.4	0.951076	0.238024	1	1	PGA4_CANAL	PHR2_CANAL
biological_process	GO:0042149	cellular response to glucose starvation	2	11	0.181818	0.601556	0.689554	1	1	MP65_CANAL	A0A1D8PGA2_CANAL
biological_process	GO:0007035	vacuolar acidification	2	13	0.153846	0.546847	0.732536	1	1	A0A1D8PGH4_CANAL	A0A1D8PNI0_CANAL
biological_process	GO:0001403	invasive growth in response to glucose limitation	2	11	0.181818	0.546847	0.732536	1	1	CDC42_CANAL	A0A1D8PJG1_CANAL
biological_process	GO:0042273	ribosomal large subunit biogenesis	2	24	0.0833333	0.0264687	0.988574	0.999	1	JIP5_CANAL	Q59M49_CANAL
biological_process	GO:1900438	negative regulation of filamentous growth of a population of unicellular organisms in response to chemical stimulus	2	3	0.666667	0.993389	0.092556	1	1	SCH9_CANAL	A0A1D8PCG5_CANAL
biological_process	GO:0032186	cellular bud neck septin ring organization	2	7	0.285714	0.872354	0.389711	1	1	Q5ANK2_CANAL	Q59Q44_CANAL
biological_process	GO:0034613	cellular protein localization	2	16	0.125	0.958082	0.0552885	1	1	CDC10_CANAL	Q5A6P9_CANAL
biological_process	GO:0010458	exit from mitosis	2	6	0.333333	0.980981	0.0628067	1	1	CDC10_CANAL	GIN4_CANAL
biological_process	GO:0071902	positive regulation of protein serine/threonine kinase activity	2	6	0.333333	0.915597	0.314835	1	1	CDC10_CANAL	Q5A2C3_CANAL
biological_process	GO:0000921	septin ring assembly	2	7	0.285714	0.872354	0.389711	1	1	CDC10_CANAL	GIN4_CANAL
biological_process	GO:0097308	cellular response to farnesol	2	3	0.666667	0.993389	0.092556	1	1	NIK1_CANAL	TUP1_CANAL
biological_process	GO:0000027	ribosomal large subunit assembly	2	19	0.105263	0.245387	0.912863	1	1	Q59M49_CANAL	A0A1D8PL61_CANAL
biological_process	GO:0000395	mRNA 5'-splice site recognition	2	3	0.666667	0.993389	0.092556	1	1	Q5A322_CANAL	A0A1D8PGF5_CANAL
biological_process	GO:0051568	histone H3-K4 methylation	2	8	0.25	0.73941	0.50567	1	1	A0A1D8PJK6_CANAL	A0A1D8PPT7_CANAL
biological_process	GO:0000165	MAPK cascade	2	5	0.4	0.72231	0.491095	1	1	STE20_CANAL	STE7_CANAL
biological_process	GO:0043408	regulation of MAPK cascade	2	3	0.666667	0.783917	0.453153	1	1	STE20_CANAL	CLA4_CANAL
biological_process	GO:0032543	mitochondrial translation	2	24	0.0833333	0.00884577	0.998347	0.874	1	GATB_CANAL	Q5A5B3_CANAL
biological_process	GO:0006334	nucleosome assembly	2	12	0.166667	0.641547	0.575834	1	1	SPT16_CANAL	A0A1D8PLL1_CANAL
biological_process	GO:0060258	negative regulation of filamentous growth	2	8	0.25	0.95666	0.0830194	1	1	SSN3_CANAL	A0A1D8PHD2_CANAL
biological_process	GO:0070481	nuclear-transcribed mRNA catabolic process, non-stop decay	2	13	0.153846	0.546847	0.732536	1	1	SSN3_CANAL	Q5A337_CANAL
biological_process	GO:0000435	positive regulation of transcription from RNA polymerase II promoter by galactose	2	4	0.5	0.977272	0.162384	1	1	SSN3_CANAL	A0A1D8PF20_CANAL
biological_process	GO:0090110	COPII-coated vesicle cargo loading	2	7	0.285714	0.872354	0.389711	1	1	A0A1D8PQX8_CANAL	A0A1D8PGX7_CANAL
biological_process	GO:0000272	polysaccharide catabolic process	2	7	0.285714	0.39793	0.832174	1	1	SUN41_CANAL	CHI2_CANAL
biological_process	GO:0006336	DNA replication-independent chromatin assembly	2	5	0.4	0.769872	0.526538	1	1	HIR2_CANAL	Q5AKU2_CANAL
biological_process	GO:0006493	protein O-linked glycosylation	2	16	0.125	0.0937639	0.974032	1	1	MNN15_CANAL	GDA1_CANAL
biological_process	GO:0046354	mannan biosynthetic process	2	6	0.333333	0.823162	0.460669	1	1	MNN22_CANAL	MNN26_CANAL
biological_process	GO:0035268	protein mannosylation	2	6	0.333333	0.278414	0.897038	1	1	MNN22_CANAL	MNN26_CANAL
biological_process	GO:0009060	aerobic respiration	2	20	0.1	0.000260334	0.999947	0.042	1	Q5A1Y2_CANAL	Q59TU5_CANAL
biological_process	GO:0034354	'de novo' NAD biosynthetic process from tryptophan	2	7	0.285714	0.872354	0.389711	1	1	KMO_CANAL	KFA_CANAL
biological_process	GO:0019674	NAD metabolic process	2	3	0.666667	0.960674	0.135053	1	1	KMO_CANAL	A0A1D8PKE0_CANAL
biological_process	GO:0009303	rRNA transcription	2	5	0.4	0.825439	0.324267	1	1	A0A1D8PM79_CANAL	A0A1D8PHX3_CANAL
biological_process	GO:0000389	mRNA 3'-splice site recognition	2	3	0.666667	0.993389	0.092556	1	1	ISY1_CANAL	Q5A322_CANAL
biological_process	GO:0009372	quorum sensing	2	3	0.666667	0.993389	0.092556	1	1	CZF1_CANAL	TUP1_CANAL
biological_process	GO:0030490	maturation of SSU-rRNA	2	14	0.142857	0.39925	0.71969	1	1	Q5A756_CANAL	Q5ANE4_CANAL
biological_process	GO:0016126	sterol biosynthetic process	2	16	0.125	0.107831	0.962115	1	1	MVD1_CANAL	A0A1D8PJM6_CANAL
biological_process	GO:0044804	autophagy of nucleus	2	8	0.25	0.87593	0.253328	1	1	ATG18_CANAL	ATG21_CANAL
biological_process	GO:0006744	ubiquinone biosynthetic process	2	12	0.166667	0.39793	0.832174	1	1	A0A1D8PCI9_CANAL	A0A1D8PU08_CANAL
biological_process	GO:0015677	copper ion import	2	16	0.125	0.39793	0.832174	1	1	FRE1_CANAL	A0A1D8PTG2_CANAL
biological_process	GO:0006629	lipid metabolic process	2	12	0.166667	0.0111142	0.992804	0.94	1	A0A1D8PFN1_CANAL	Q5ANH8_CANAL
biological_process	GO:0098789	pre-mRNA cleavage required for polyadenylation	2	12	0.166667	0.601556	0.689554	1	1	CFT1_CANAL	A0A1D8PTU2_CANAL
biological_process	GO:0003333	amino acid transmembrane transport	2	29	0.0689655	0.0123197	0.997592	0.951	1	A0A1D8PH27_CANAL	A0A1D8PKB2_CANAL
biological_process	GO:0071931	positive regulation of transcription involved in G1/S transition of mitotic cell cycle	2	5	0.4	0.951076	0.238024	1	1	A0A1D8PCM9_CANAL	A0A1D8PJV0_CANAL
biological_process	GO:0030466	silent mating-type cassette heterochromatin assembly	2	14	0.142857	0.314808	0.878569	1	1	A0A1D8PNK6_CANAL	Q5A102_CANAL
biological_process	GO:0030174	regulation of DNA-dependent DNA replication initiation	2	10	0.2	0.65768	0.641036	1	1	SET2_CANAL	A0A1D8PFE6_CANAL
biological_process	GO:0016226	iron-sulfur cluster assembly	2	19	0.105263	0.143742	0.956019	1	1	NBP35_CANAL	Q5ADN0_CANAL
biological_process	GO:0031509	subtelomeric heterochromatin assembly	2	17	0.117647	0.354645	0.857083	1	1	A0A1D8PNK6_CANAL	A0A1D8PMS3_CANAL
biological_process	GO:0006265	DNA topological change	2	8	0.25	0.823162	0.460669	1	1	Q5ADX0_CANAL	Q5A5R4_CANAL
biological_process	GO:0070550	rDNA condensation	2	4	0.5	0.977272	0.162384	1	1	Q5A4Y2_CANAL	A0A1D8PI59_CANAL
biological_process	GO:0008654	phospholipid biosynthetic process	2	8	0.25	0.215369	0.858009	1	1	A0A1D8PJ38_CANAL	A0A1D8PGK8_CANAL
biological_process	GO:0031929	TOR signaling	2	7	0.285714	0.937369	0.130751	1	1	A0A1D8PDD8_CANAL	Q5A2C3_CANAL
biological_process	GO:0006396	RNA processing	2	16	0.125	0.0461538	0.965586	1	1	A0A1D8PM79_CANAL	Q5ANN5_CANAL
biological_process	GO:0071468	cellular response to acidic pH	2	4	0.5	0.994736	0.0489238	1	1	CRZ1_CANAL	Q5AKX6_CANAL
biological_process	GO:0070417	cellular response to cold	2	4	0.5	0.951076	0.238024	1	1	CAS5_CANAL	Q5ANK2_CANAL
biological_process	GO:0000086	G2/M transition of mitotic cell cycle	2	8	0.25	0.825439	0.324267	1	1	A0A1D8PRF5_CANAL	Q5A9A6_CANAL
biological_process	GO:0000281	mitotic cytokinesis	2	7	0.285714	0.830455	0.279266	1	1	CDC10_CANAL	Q59UQ6_CANAL
biological_process	GO:0006038	cell wall chitin biosynthetic process	2	6	0.333333	0.823162	0.460669	1	1	A0A1D8PTV3_CANAL	A0A1D8PK97_CANAL
biological_process	GO:0000128	flocculation	2	4	0.5	0.872354	0.389711	1	1	SFL2_CANAL	ALS1_CANAL
biological_process	GO:1990961	xenobiotic detoxification by transmembrane export across the plasma membrane	2	30	0.0666667	0.0600604	0.984816	1	1	QDR3_CANAL	A0A1D8PCL5_CANAL
biological_process	GO:2000220	regulation of pseudohyphal growth	2	2	1	0.973256	0.127646	1	1	MCM1_CANAL	CPH1_CANAL
biological_process	GO:0006807	nitrogen compound metabolic process	2	10	0.2	0.976495	0.0283263	1	1	CARP3_CANAL	A0A1D8PFI5_CANAL
biological_process	GO:0019933	cAMP-mediated signaling	2	5	0.4	0.951076	0.238024	1	1	Q5A6P9_CANAL	A0A1D8PJG1_CANAL
biological_process	GO:0036086	positive regulation of transcription from RNA polymerase II promoter in response to iron ion starvation	2	2	1	1	0.035259	1	1	AFT2_CANAL	A0A1D8PFM7_CANAL
biological_process	GO:0016236	macroautophagy	2	8	0.25	0.860176	0.234338	1	1	ATG15_CANAL	A0A1D8PJW1_CANAL
biological_process	GO:0046512	sphingosine biosynthetic process	2	5	0.4	0.951076	0.238024	1	1	Q5A3L3_CANAL	Q5AMG6_CANAL
biological_process	GO:0009134	nucleoside diphosphate catabolic process	2	2	1	1	0.035259	1	1	GDA1_CANAL	Q5A1A4_CANAL
biological_process	GO:0006826	iron ion transport	2	21	0.0952381	0.0479145	0.985484	1	1	FRE1_CANAL	A0A1D8PTG2_CANAL
biological_process	GO:0000722	telomere maintenance via recombination	2	10	0.2	0.714207	0.586724	1	1	PIF1_CANAL	Q5A5R4_CANAL
biological_process	GO:0051315	attachment of mitotic spindle microtubules to kinetochore	2	6	0.333333	0.864947	0.34232	1	1	NDC80_CANAL	A0A1D8PTC7_CANAL
biological_process	GO:0006497	protein lipidation	2	3	0.666667	0.344473	0.787981	1	1	ATG18_CANAL	ATG21_CANAL
biological_process	GO:0033567	DNA replication, Okazaki fragment processing	2	2	1	0.993389	0.092556	1	1	MPH1_CANAL	A0A1D8PPB3_CANAL
biological_process	GO:0071932	replication fork reversal	2	2	1	1	0.035259	1	1	MPH1_CANAL	PIF1_CANAL
biological_process	GO:0044396	actin cortical patch organization	2	11	0.181818	0.937193	0.166405	1	1	SLA1_CANAL	PAN1_CANAL
biological_process	GO:0042594	response to starvation	2	3	0.666667	0.989419	0.0158946	1	1	MNL1_CANAL	A0A1D8PEH3_CANAL
biological_process	GO:0006414	translational elongation	2	12	0.166667	0.0828927	0.972341	1	1	A0A1D8PKC3_CANAL	A0A1D8PRL2_CANAL
biological_process	GO:0071244	cellular response to carbon dioxide	2	7	0.285714	0.872354	0.389711	1	1	Q5A645_CANAL	A0A1D8PRZ8_CANAL
biological_process	GO:0008298	intracellular mRNA localization	2	8	0.25	0.823162	0.460669	1	1	SHE3_CANAL	A0A1D8PPV5_CANAL
biological_process	GO:0032007	negative regulation of TOR signaling	2	5	0.4	0.995454	0.0252806	1	1	A0A1D8PMB6_CANAL	A0A1D8PHK4_CANAL
biological_process	GO:0007329	positive regulation of transcription from RNA polymerase II promoter by pheromones	2	4	0.5	0.977272	0.162384	1	1	CPH1_CANAL	TEC1_CANAL
biological_process	GO:0019722	calcium-mediated signaling	2	4	0.5	0.864947	0.34232	1	1	CRZ1_CANAL	A0A1D8PJQ9_CANAL
biological_process	GO:0071260	cellular response to mechanical stimulus	2	5	0.4	0.951076	0.238024	1	1	CRZ1_CANAL	Q5A936_CANAL
biological_process	GO:0006915	apoptotic process	2	7	0.285714	0.646653	0.60207	1	1	GIN4_CANAL	A0A1D8PSZ1_CANAL
biological_process	GO:0044805	late nucleophagy	2	6	0.333333	0.915597	0.314835	1	1	ATG7_CANAL	ATG2_CANAL
biological_process	GO:0032446	protein modification by small protein conjugation	2	6	0.333333	0.885153	0.174405	1	1	ATG7_CANAL	A0A1D8PKJ3_CANAL
biological_process	GO:0034316	negative regulation of Arp2/3 complex-mediated actin nucleation	2	4	0.5	0.977272	0.162384	1	1	SLA1_CANAL	A0A1D8PRF5_CANAL
biological_process	GO:0006627	protein processing involved in protein targeting to mitochondrion	2	7	0.285714	0.872354	0.389711	1	1	PMIP_CANAL	A0A1D8PN84_CANAL
biological_process	GO:0000160	phosphorelay signal transduction system	2	5	0.4	0.973256	0.127646	1	1	SKN7_CANAL	A0A1D8PQP3_CANAL
biological_process	GO:0008361	regulation of cell size	2	2	1	0.977272	0.162384	1	1	SKN7_CANAL	Q5ANF0_CANAL
biological_process	GO:0006301	postreplication repair	2	7	0.285714	0.783917	0.453153	1	1	PAN2_CANAL	Q5A102_CANAL
biological_process	GO:0032258	cytoplasm to vacuole transport by the Cvt pathway	2	12	0.166667	0.601556	0.689554	1	1	A0A1D8PFH1_CANAL	A0A1D8PLM0_CANAL
biological_process	GO:0050684	regulation of mRNA processing	2	3	0.666667	0.929742	0.230128	1	1	A0A1D8PHP6_CANAL	A0A1D8PDS9_CANAL
biological_process	GO:0032508	DNA duplex unwinding	2	5	0.4	0.73941	0.50567	1	1	PIF1_CANAL	Q5A5R4_CANAL
biological_process	GO:0043570	maintenance of DNA repeat elements	2	3	0.666667	0.973256	0.127646	1	1	Q5A102_CANAL	A0A1D8PFM1_CANAL
biological_process	GO:0007131	reciprocal meiotic recombination	2	15	0.133333	0.60489	0.573873	1	1	Q59SL0_CANAL	Q5A5N2_CANAL
biological_process	GO:0030437	ascospore formation	2	7	0.285714	0.560165	0.651957	1	1	SET2_CANAL	A0A1D8PJG1_CANAL
biological_process	GO:0006353	DNA-templated transcription, termination	2	5	0.4	0.869249	0.241554	1	1	SET2_CANAL	XRN2_CANAL
biological_process	GO:1904669	ATP export	2	6	0.333333	0.915597	0.314835	1	1	Q59N31_CANAL	Q5A501_CANAL
biological_process	GO:0032511	late endosome to vacuole transport via multivesicular body sorting pathway	2	11	0.181818	0.99529	0.014975	1	1	A0A1D8PPV5_CANAL	Q5A3J5_CANAL
biological_process	GO:0000245	spliceosomal complex assembly	2	8	0.25	0.96708	0.104816	1	1	A0A1D8PHP6_CANAL	A0A1D8PDS9_CANAL
biological_process	GO:0048278	vesicle docking	2	8	0.25	0.508905	0.721586	1	1	A0A1D8PK25_CANAL	A0A1D8PNI0_CANAL
biological_process	GO:0030488	tRNA methylation	2	17	0.117647	0.278414	0.897038	1	1	A0A1D8PIS7_CANAL	Q5ADU0_CANAL
biological_process	GO:0001510	RNA methylation	2	7	0.285714	0.0820846	0.968772	1	1	SPB1_CANAL	Q5ADU0_CANAL
biological_process	GO:0006352	DNA-templated transcription, initiation	2	7	0.285714	0.670611	0.444928	1	1	Q5AHZ3_CANAL	Q5A7B0_CANAL
biological_process	GO:0006235	dTTP biosynthetic process	2	3	0.666667	0.993389	0.092556	1	1	Q5A0N3_CANAL	Q59TV7_CANAL
biological_process	GO:0006749	glutathione metabolic process	2	16	0.125	0.60071	0.615066	1	1	URE2_CANAL	A0A1D8PKC3_CANAL
biological_process	GO:0043248	proteasome assembly	2	8	0.25	0.553833	0.685192	1	1	Q5A3L0_CANAL	A0A1D8PMM0_CANAL
biological_process	GO:0007033	vacuole organization	2	17	0.117647	0.949953	0.0885494	1	1	A0A1D8PRW9_CANAL	A0A1D8PGH4_CANAL
biological_process	GO:1904262	negative regulation of TORC1 signaling	2	5	0.4	0.951076	0.238024	1	1	ATM_CANAL	A0A1D8PQT9_CANAL
biological_process	GO:0006688	glycosphingolipid biosynthetic process	2	9	0.222222	0.49433	0.770347	1	1	BMT2_CANAL	BMT6_CANAL
biological_process	GO:0006869	lipid transport	2	5	0.4	0.699919	0.462039	1	1	ATG2_CANAL	A0A1D8PNV5_CANAL
biological_process	GO:0000282	cellular bud site selection	2	10	0.2	0.977729	0.0791386	1	1	A0A1D8PFH4_CANAL	A0A1D8PGF8_CANAL
biological_process	GO:0043335	protein unfolding	2	4	0.5	0.977272	0.162384	1	1	A0A1D8PTP9_CANAL	Q59ZE6_CANAL
biological_process	GO:0031048	heterochromatin assembly by small RNA	2	4	0.5	0.977272	0.162384	1	1	Q5A8Y5_CANAL	A0A1D8PPU7_CANAL
biological_process	GO:0030050	vesicle transport along actin filament	2	2	1	1	0.035259	1	1	MYO5_CANAL	Q5AKW2_CANAL
biological_process	GO:0006796	phosphate-containing compound metabolic process	2	10	0.2	0.585792	0.462343	1	1	Q5ANH8_CANAL	A0A1D8PMD1_CANAL
biological_process	GO:0045144	meiotic sister chromatid segregation	2	3	0.666667	0.95434	0.176838	1	1	IPL1_CANAL	A0A1D8PT88_CANAL
biological_process	GO:0042274	ribosomal small subunit biogenesis	2	10	0.2	0.311928	0.781805	1	1	HAS1_CANAL	A0A1D8PGL7_CANAL
biological_process	GO:0000105	histidine biosynthetic process	2	8	0.25	0.823162	0.460669	1	1	A0A1D8PRE9_CANAL	A0A1D8PKY7_CANAL
biological_process	GO:0006109	regulation of carbohydrate metabolic process	2	5	0.4	0.833595	0.353347	1	1	Q59X47_CANAL	Q5AKY0_CANAL
biological_process	GO:0051453	regulation of intracellular pH	2	5	0.4	0.761247	0.446167	1	1	Q5AHB5_CANAL	Q5AK53_CANAL
biological_process	GO:0000083	regulation of transcription involved in G1/S transition of mitotic cell cycle	2	7	0.285714	0.769872	0.526538	1	1	A0A1D8PCM9_CANAL	A0A1D8PJV0_CANAL
biological_process	GO:0016559	peroxisome fission	2	5	0.4	0.951076	0.238024	1	1	A0A1D8PN45_CANAL	A0A1D8PKC9_CANAL
biological_process	GO:0030042	actin filament depolymerization	2	4	0.5	0.769872	0.526538	1	1	A0A1D8PHR2_CANAL	Q5A6P9_CANAL
biological_process	GO:0001402	signal transduction involved in filamentous growth	2	7	0.285714	0.872354	0.389711	1	1	A0A1D8PGF8_CANAL	A0A1D8PJG1_CANAL
biological_process	GO:0034475	U4 snRNA 3'-end processing	2	10	0.2	0.714207	0.586724	1	1	A0A1D8PM79_CANAL	A0A1D8PCE7_CANAL
biological_process	GO:0006644	phospholipid metabolic process	2	9	0.222222	0.067069	0.959858	1	1	A0A1D8PPA6_CANAL	A0A1D8PGK8_CANAL
biological_process	GO:0032981	mitochondrial respiratory chain complex I assembly	2	15	0.133333	0.444565	0.803411	1	1	A0A1D8PU10_CANAL	A0A1D8PJ15_CANAL
biological_process	GO:0048268	clathrin coat assembly	2	3	0.666667	0.993389	0.092556	1	1	A0A1D8PRF5_CANAL	A0A1D8PL36_CANAL
biological_process	GO:0015937	coenzyme A biosynthetic process	2	6	0.333333	0.915597	0.314835	1	1	Q5A868_CANAL	A0A1D8PKD2_CANAL
biological_process	GO:0036164	cell-abiotic substrate adhesion	2	10	0.2	0.714207	0.586724	1	1	Q59XU9_CANAL	A0A1D8PRI0_CANAL
biological_process	GO:0031124	mRNA 3'-end processing	2	4	0.5	0.935719	0.13933	1	1	A0A1D8PUB3_CANAL	A0A1D8PN05_CANAL
biological_process	GO:0044255	cellular lipid metabolic process	2	9	0.222222	0.0322638	0.97812	0.999	1	Q5ALW4_CANAL	A0A1D8PJ34_CANAL
biological_process	GO:0051278	fungal-type cell wall polysaccharide biosynthetic process	2	13	0.153846	0.641547	0.575834	1	1	A0A1D8PCT0_CANAL	Q5AHE5_CANAL
biological_process	GO:0043666	regulation of phosphoprotein phosphatase activity	2	8	0.25	0.546847	0.732536	1	1	Q5A936_CANAL	Q59QN2_CANAL
biological_process	GO:0009062	fatty acid catabolic process	2	10	0.2	0.494258	0.689834	1	1	Q5ALW4_CANAL	A0A1D8PGH7_CANAL
biological_process	GO:0036228	protein localization to nuclear inner membrane	2	4	0.5	0.977272	0.162384	1	1	A0A1D8PS91_CANAL	A0A1D8PFQ0_CANAL
biological_process	GO:0015074	DNA integration	2	6	0.333333	0.915597	0.314835	1	1	Q5ADN4_CANAL	A0A1D8PI28_CANAL
biological_process	GO:0000290	deadenylation-dependent decapping of nuclear-transcribed mRNA	2	9	0.222222	0.769872	0.526538	1	1	A0A1D8PM60_CANAL	A0A1D8PTQ2_CANAL
biological_process	GO:0045947	negative regulation of translational initiation	2	3	0.666667	0.977272	0.162384	1	1	A0A1D8PM60_CANAL	Q5AAR2_CANAL
biological_process	GO:0033314	mitotic DNA replication checkpoint signaling	2	7	0.285714	0.872354	0.389711	1	1	A0A1D8PQP2_CANAL	A0A1D8PHD2_CANAL
biological_process	GO:0071028	nuclear mRNA surveillance	2	9	0.222222	0.646653	0.60207	1	1	A0A1D8PRZ6_CANAL	A0A1D8PKD8_CANAL
biological_process	GO:0009113	purine nucleobase biosynthetic process	2	4	0.5	0.601556	0.689554	1	1	Q5A683_CANAL	Q59SM8_CANAL
biological_process	GO:0070979	protein K11-linked ubiquitination	2	4	0.5	0.977272	0.162384	1	1	A0A1D8PE86_CANAL	A0A1D8PCA6_CANAL
biological_process	GO:0009263	deoxyribonucleotide biosynthetic process	2	4	0.5	0.95434	0.176838	1	1	Q5A0N3_CANAL	A0A1D8PT08_CANAL
biological_process	GO:0000972	transcription-dependent tethering of RNA polymerase II gene DNA at nuclear periphery	2	4	0.5	0.95434	0.176838	1	1	A0A1D8PQE5_CANAL	Q5AAV6_CANAL
biological_process	GO:0006379	mRNA cleavage	2	5	0.4	0.72231	0.491095	1	1	A0A1D8PPQ9_CANAL	A0A1D8PHH9_CANAL
biological_process	GO:0006271	DNA strand elongation involved in DNA replication	2	11	0.181818	0.711663	0.479702	1	1	A0A1D8PCY7_CANAL	A0A1D8PFE6_CANAL
biological_process	GO:0007188	adenylate cyclase-modulating G protein-coupled receptor signaling pathway	2	3	0.666667	0.986555	0.0844026	1	1	Q5A3J9_CANAL	A0A1D8PJG1_CANAL
biological_process	GO:0045332	phospholipid translocation	2	10	0.2	0.601556	0.689554	1	1	A0A1D8PLQ7_CANAL	A0A1D8PHB8_CANAL
biological_process	GO:0000749	response to pheromone triggering conjugation with cellular fusion	2	7	0.285714	0.959936	0.102033	1	1	A0A1D8PLQ7_CANAL	A0A1D8PJG1_CANAL
biological_process	GO:0000012	single strand break repair	2	2	1	1	0.035259	1	1	A0A1D8PSG1_CANAL	A0A1D8PSI5_CANAL
biological_process	GO:0031122	cytoplasmic microtubule organization	2	7	0.285714	0.985087	0.0702581	1	1	A0A1D8PSM7_CANAL	Q59PZ2_CANAL
biological_process	GO:0006614	SRP-dependent cotranslational protein targeting to membrane	2	7	0.285714	0.444565	0.803411	1	1	A0A1D8PPX2_CANAL	A0A1D8PLY2_CANAL
biological_process	GO:0019358	nicotinate nucleotide salvage	2	5	0.4	0.951076	0.238024	1	1	A0A1D8PRE2_CANAL	A0A1D8PRI0_CANAL
biological_process	GO:0043928	exonucleolytic catabolism of deadenylated mRNA	2	6	0.333333	0.915597	0.314835	1	1	Q5A8L5_CANAL	A0A1D8PCE7_CANAL
biological_process	GO:0045842	positive regulation of mitotic metaphase/anaphase transition	2	10	0.2	0.65768	0.641036	1	1	A0A1D8PRX3_CANAL	A0A1D8PFN5_CANAL
biological_process	GO:0032786	positive regulation of DNA-templated transcription, elongation	2	2	1	0.851698	0.288337	1	1	Q5A5P9_CANAL	A0A1D8PD68_CANAL
biological_process	GO:0006282	regulation of DNA repair	2	3	0.666667	0.872354	0.389711	1	1	A0A1D8PCY7_CANAL	Q59S64_CANAL
biological_process	GO:0009058	biosynthetic process	2	8	0.25	0.688127	0.341254	1	1	A0A1D8PHC9_CANAL	A0A1D8PJ15_CANAL
biological_process	GO:0010737	protein kinase A signaling	2	4	0.5	0.977272	0.162384	1	1	A0A1D8PT45_CANAL	A0A1D8PJG1_CANAL
biological_process	GO:0009097	isoleucine biosynthetic process	2	7	0.285714	0.872354	0.389711	1	1	A0A1D8PJF9_CANAL	A0A1D8PGA8_CANAL
biological_process	GO:0046856	phosphatidylinositol dephosphorylation	2	7	0.285714	0.823162	0.460669	1	1	A0A1D8PEF4_CANAL	A0A1D8PQN8_CANAL
biological_process	GO:0048280	vesicle fusion with Golgi apparatus	2	9	0.222222	0.769872	0.526538	1	1	A0A1D8PJW1_CANAL	A0A1D8PMA2_CANAL
biological_process	GO:0032888	regulation of mitotic spindle elongation	2	2	1	0.994736	0.0489238	1	1	A0A1D8PCM0_CANAL	Q5A4Z1_CANAL
biological_process	GO:0031578	mitotic spindle orientation checkpoint signaling	2	4	0.5	0.977272	0.162384	1	1	Q59Q44_CANAL	A0A1D8PC67_CANAL
biological_process	GO:0001682	tRNA 5'-leader removal	2	4	0.5	0.977272	0.162384	1	1	A0A1D8PQ05_CANAL	A0A1D8PSF2_CANAL
biological_process	GO:0000973	posttranscriptional tethering of RNA polymerase II gene DNA at nuclear periphery	2	5	0.4	0.951076	0.238024	1	1	A0A1D8PKH4_CANAL	A0A1D8PQE5_CANAL
biological_process	GO:0045859	regulation of protein kinase activity	2	3	0.666667	0.905894	0.187463	1	1	Q59X47_CANAL	Q5AKY0_CANAL
biological_process	GO:0018026	peptidyl-lysine monomethylation	2	6	0.333333	0.915597	0.314835	1	1	A0A1D8PTX3_CANAL	A0A1D8PFW1_CANAL
biological_process	GO:0007020	microtubule nucleation	2	4	0.5	0.977272	0.162384	1	1	Q5A880_CANAL	Q59PZ2_CANAL
biological_process	GO:0007534	gene conversion at mating-type locus	2	2	1	1	0.035259	1	1	Q5A102_CANAL	Q5A5R4_CANAL
biological_process	GO:0045910	negative regulation of DNA recombination	2	3	0.666667	0.996529	0.0267443	1	1	Q5A102_CANAL	A0A1D8PFM1_CANAL
biological_process	GO:0046785	microtubule polymerization	2	2	1	0.996529	0.0267443	1	1	A0A1D8PIP2_CANAL	A0A1D8PTZ8_CANAL
biological_process	GO:0016233	telomere capping	2	4	0.5	0.973256	0.127646	1	1	A0A1D8PEA0_CANAL	A0A1D8PI83_CANAL
biological_process	GO:0006972	hyperosmotic response	2	2	1	0.986555	0.0844026	1	1	Q5ADP3_CANAL	A0A1D8PGF8_CANAL
biological_process	GO:0044773	mitotic DNA damage checkpoint signaling	2	2	1	0.826054	0.398444	1	1	A0A1D8PI13_CANAL	A0A1D8PP50_CANAL
biological_process	GO:0034058	endosomal vesicle fusion	2	5	0.4	0.951076	0.238024	1	1	A0A1D8PGN0_CANAL	A0A1D8PUA0_CANAL
biological_process	GO:0034660	ncRNA metabolic process	2	3	0.666667	0.00105449	0.999392	0.195	1	Q5ANN5_CANAL	A0A1D8PP74_CANAL
biological_process	GO:2000815	regulation of mRNA stability involved in response to oxidative stress	2	3	0.666667	0.993389	0.092556	1	1	A0A1D8PRZ6_CANAL	A0A1D8PKD8_CANAL
biological_process	GO:0032012	regulation of ARF protein signal transduction	2	3	0.666667	0.993389	0.092556	1	1	A0A1D8PRB9_CANAL	Q5ANF9_CANAL
biological_process	GO:0000390	spliceosomal complex disassembly	2	3	0.666667	0.993389	0.092556	1	1	A0A1D8PP74_CANAL	Q5AJA5_CANAL
biological_process	GO:0031030	negative regulation of septation initiation signaling	2	6	0.333333	0.915597	0.314835	1	1	A0A1D8PPB7_CANAL	A0A1D8PGP6_CANAL
biological_process	GO:0007076	mitotic chromosome condensation	2	7	0.285714	0.769872	0.526538	1	1	Q5A4Y2_CANAL	A0A1D8PI59_CANAL
biological_process	GO:0070058	tRNA gene clustering	2	3	0.666667	0.993389	0.092556	1	1	Q5A4Y2_CANAL	A0A1D8PI59_CANAL
biological_process	GO:0051654	establishment of mitochondrion localization	1	4	0.25	0.951076	0.238024	1	1	A0A1D8PMG9_CANAL
biological_process	GO:0070096	mitochondrial outer membrane translocase complex assembly	1	4	0.25	0.837616	0.565131	1	1	MMM1_CANAL
biological_process	GO:1990456	mitochondrion-endoplasmic reticulum membrane tethering	1	5	0.2	0.761976	0.646907	1	1	MMM1_CANAL
biological_process	GO:0015914	phospholipid transport	1	7	0.142857	0.553833	0.685192	1	1	MMM1_CANAL
biological_process	GO:0060257	negative regulation of flocculation	1	5	0.2	0.761976	0.646907	1	1	SFL2_CANAL
biological_process	GO:0030476	ascospore wall assembly	1	9	0.111111	0.473462	0.846619	1	1	QDR3_CANAL
biological_process	GO:0006037	cell wall chitin metabolic process	1	3	0.333333	0.864947	0.34232	1	1	CRH12_CANAL
biological_process	GO:0007114	cell budding	1	4	0.25	0.962488	0.104575	1	1	CDC42_CANAL
biological_process	GO:0010106	cellular response to iron ion starvation	1	7	0.142857	0.864947	0.34232	1	1	PACC_CANAL
biological_process	GO:0002666	positive regulation of T cell tolerance induction	1	1	1	1	0.18787	1	1	PACC_CANAL
biological_process	GO:0000725	recombinational repair	1	5	0.2	0.842473	0.257807	1	1	SWR1_CANAL
biological_process	GO:0002181	cytoplasmic translation	1	27	0.037037	0.00512884	0.998477	0.686	1	Q5ADU0_CANAL
biological_process	GO:0000028	ribosomal small subunit assembly	1	15	0.0666667	0.142917	0.971134	1	1	A0A1D8PGJ5_CANAL
biological_process	GO:0030150	protein import into mitochondrial matrix	1	18	0.0555556	0.121431	0.976579	1	1	TIM50_CANAL
biological_process	GO:0061640	cytoskeleton-dependent cytokinesis	1	7	0.142857	0.809892	0.305489	1	1	CDC10_CANAL
biological_process	GO:0000082	G1/S transition of mitotic cell cycle	1	8	0.125	0.675733	0.518561	1	1	Q5A9A6_CANAL
biological_process	GO:0097271	protein localization to bud neck	1	5	0.2	0.761976	0.646907	1	1	BUD4_CANAL
biological_process	GO:0007234	osmosensory signaling via phosphorelay pathway	1	3	0.333333	0.907444	0.464444	1	1	NIK1_CANAL
biological_process	GO:0006075	(1->3)-beta-D-glucan biosynthetic process	1	4	0.25	0.929742	0.230128	1	1	A0A1D8PCT0_CANAL
biological_process	GO:0032956	regulation of actin cytoskeleton organization	1	8	0.125	0.514471	0.646609	1	1	IQG1_CANAL
biological_process	GO:0008360	regulation of cell shape	1	6	0.166667	0.546847	0.732536	1	1	Q5AB80_CANAL
biological_process	GO:0000492	box C/D snoRNP assembly	1	6	0.166667	0.685165	0.713321	1	1	RUVB2_CANAL
biological_process	GO:0000387	spliceosomal snRNP assembly	1	10	0.1	0.546847	0.732536	1	1	A0A1D8PPJ4_CANAL
biological_process	GO:0051666	actin cortical patch localization	1	14	0.0714286	0.229653	0.945976	1	1	A0A1D8PRF5_CANAL
biological_process	GO:0030435	sporulation resulting in formation of a cellular spore	1	5	0.2	0.694511	0.448202	1	1	RMD9_CANAL
biological_process	GO:0035493	SNARE complex assembly	1	2	0.5	0.964741	0.340481	1	1	SEC9_CANAL
biological_process	GO:0034724	DNA replication-independent chromatin organization	1	1	1	0.899757	0.285793	1	1	SPT16_CANAL
biological_process	GO:0045899	positive regulation of RNA polymerase II transcription preinitiation complex assembly	1	8	0.125	0.539331	0.811055	1	1	SPT16_CANAL
biological_process	GO:0007063	regulation of sister chromatid cohesion	1	1	1	0.907444	0.464444	1	1	SPT16_CANAL
biological_process	GO:0016042	lipid catabolic process	1	22	0.0454545	0.0568036	0.973191	1	1	A0A1D8PJ34_CANAL
biological_process	GO:0000469	cleavage involved in rRNA processing	1	3	0.333333	0.610238	0.54547	1	1	RRP36_CANAL
biological_process	GO:0031648	protein destabilization	1	1	1	1	0.18787	1	1	SSN3_CANAL
biological_process	GO:0006979	response to oxidative stress	1	10	0.1	0.261438	0.810862	1	1	SSN3_CANAL
biological_process	GO:0043547	positive regulation of GTPase activity	1	6	0.166667	0.953614	0.13403	1	1	A0A1D8PMB6_CANAL
biological_process	GO:0061709	reticulophagy	1	5	0.2	0.761976	0.646907	1	1	ATG2_CANAL
biological_process	GO:0044772	mitotic cell cycle phase transition	1	5	0.2	0.985042	0.0275127	1	1	CG24_CANAL
biological_process	GO:0043171	peptide catabolic process	1	4	0.25	0.823162	0.460669	1	1	A0A1D8PQC4_CANAL
biological_process	GO:0006099	tricarboxylic acid cycle	1	24	0.0416667	0.0439807	0.993326	1	1	A0A1D8PTB5_CANAL
biological_process	GO:0002183	cytoplasmic translational initiation	1	8	0.125	0.225047	0.906236	1	1	Q5A6S3_CANAL
biological_process	GO:0001732	formation of cytoplasmic translation initiation complex	1	11	0.0909091	0.358964	0.898942	1	1	EIF3C_CANAL
biological_process	GO:0071852	fungal-type cell wall organization or biogenesis	1	8	0.125	0.377691	0.694473	1	1	Q59QN2_CANAL
biological_process	GO:0006096	glycolytic process	1	15	0.0666667	0.245387	0.912863	1	1	Q5AK53_CANAL
biological_process	GO:0006417	regulation of translation	1	9	0.111111	0.943224	0.0914762	1	1	A0A1D8PLT5_CANAL
biological_process	GO:0006488	dolichol-linked oligosaccharide biosynthetic process	1	13	0.0769231	0.267464	0.933431	1	1	A0A1D8PTC1_CANAL
biological_process	GO:0060237	regulation of fungal-type cell wall organization	1	5	0.2	0.761976	0.646907	1	1	Q5ANK2_CANAL
biological_process	GO:0015917	aminophospholipid transport	1	1	1	1	0.18787	1	1	MMM1_CANAL
biological_process	GO:0043420	anthranilate metabolic process	1	3	0.333333	0.907444	0.464444	1	1	KMO_CANAL
biological_process	GO:0070189	kynurenine metabolic process	1	1	1	0.977272	0.162384	1	1	KMO_CANAL
biological_process	GO:0019805	quinolinate biosynthetic process	1	3	0.333333	0.907444	0.464444	1	1	KMO_CANAL
biological_process	GO:0006569	tryptophan catabolic process	1	2	0.5	0.951076	0.238024	1	1	KMO_CANAL
biological_process	GO:0051017	actin filament bundle assembly	1	6	0.166667	0.413276	0.875496	1	1	A0A1D8PE85_CANAL
biological_process	GO:0051016	barbed-end actin filament capping	1	6	0.166667	0.610289	0.767256	1	1	A0A1D8PHR2_CANAL
biological_process	GO:0051131	chaperone-mediated protein complex assembly	1	6	0.166667	0.685165	0.713321	1	1	A0A1D8PU06_CANAL
biological_process	GO:0006515	protein quality control for misfolded or incompletely synthesized proteins	1	9	0.111111	0.21559	0.926384	1	1	LONP2_CANAL
biological_process	GO:0000470	maturation of LSU-rRNA	1	17	0.0588235	0.172015	0.917915	1	1	A0A1D8PPJ1_CANAL
biological_process	GO:0042256	mature ribosome assembly	1	6	0.166667	0.685165	0.713321	1	1	Q59WB7_CANAL
biological_process	GO:0009092	homoserine metabolic process	1	3	0.333333	0.49433	0.770347	1	1	KHSE_CANAL
biological_process	GO:0009088	threonine biosynthetic process	1	5	0.2	0.761976	0.646907	1	1	KHSE_CANAL
biological_process	GO:0033617	mitochondrial cytochrome c oxidase assembly	1	23	0.0434783	0.0522941	0.991771	1	1	Q5AJA1_CANAL
biological_process	GO:0006413	translational initiation	1	12	0.0833333	0.300848	0.827985	1	1	EIF3C_CANAL
biological_process	GO:0006501	C-terminal protein lipidation	1	4	0.25	0.837616	0.565131	1	1	ATG7_CANAL
biological_process	GO:0007346	regulation of mitotic cell cycle	1	6	0.166667	0.918321	0.131405	1	1	CG24_CANAL
biological_process	GO:0006612	protein targeting to membrane	1	14	0.0714286	0.155058	0.927517	1	1	A0A1D8PMU8_CANAL
biological_process	GO:0002098	tRNA wobble uridine modification	1	15	0.0666667	0.188852	0.937908	1	1	Q59M28_CANAL
biological_process	GO:0031507	heterochromatin assembly	1	6	0.166667	0.212019	0.887796	1	1	A0A1D8PM39_CANAL
biological_process	GO:0006783	heme biosynthetic process	1	9	0.111111	0.229653	0.945976	1	1	A0A1D8PNE8_CANAL
biological_process	GO:0016125	sterol metabolic process	1	4	0.25	0.166285	0.927531	1	1	UPC2_CANAL
biological_process	GO:0019441	tryptophan catabolic process to kynurenine	1	3	0.333333	0.907444	0.464444	1	1	KFA_CANAL
biological_process	GO:0007004	telomere maintenance via telomerase	1	7	0.142857	0.65768	0.641036	1	1	A0A1D8PEA0_CANAL
biological_process	GO:0070681	glutaminyl-tRNAGln biosynthesis via transamidation	1	3	0.333333	0.907444	0.464444	1	1	GATB_CANAL
biological_process	GO:0007186	G protein-coupled receptor signaling pathway	1	5	0.2	0.960674	0.135053	1	1	A0A1D8PH43_CANAL
biological_process	GO:0140469	GCN2-mediated signaling	1	3	0.333333	0.907444	0.464444	1	1	A0A1D8PQT9_CANAL
biological_process	GO:0031139	positive regulation of conjugation with cellular fusion	1	2	0.5	0.981686	0.0516638	1	1	Q5A2C3_CANAL
biological_process	GO:0032995	regulation of fungal-type cell wall biogenesis	1	3	0.333333	0.907444	0.464444	1	1	A0A1D8PK79_CANAL
biological_process	GO:0072344	rescue of stalled ribosome	1	6	0.166667	0.685165	0.713321	1	1	A0A1D8PS32_CANAL
biological_process	GO:1990116	ribosome-associated ubiquitin-dependent protein catabolic process	1	8	0.125	0.539331	0.811055	1	1	A0A1D8PS32_CANAL
biological_process	GO:0071276	cellular response to cadmium ion	1	6	0.166667	0.610289	0.767256	1	1	A0A1D8PPI6_CANAL
biological_process	GO:0071500	cellular response to nitrosative stress	1	7	0.142857	0.539331	0.811055	1	1	Q59M50_CANAL
biological_process	GO:2000134	negative regulation of G1/S transition of mitotic cell cycle	1	4	0.25	0.685165	0.713321	1	1	Q5ANF0_CANAL
biological_process	GO:0009636	response to toxic substance	1	6	0.166667	0.0173051	0.995491	0.984	1	A0A1D8PTL7_CANAL
biological_process	GO:0070814	hydrogen sulfide biosynthetic process	1	3	0.333333	0.837616	0.565131	1	1	A0A1D8PHL8_CANAL
biological_process	GO:0019379	sulfate assimilation, phosphoadenylyl sulfate reduction by phosphoadenylyl-sulfate reductase (thioredoxin)	1	3	0.333333	0.907444	0.464444	1	1	Q5A0Z0_CANAL
biological_process	GO:0006120	mitochondrial electron transport, NADH to ubiquinone	1	13	0.0769231	0.267464	0.933431	1	1	Q5AH07_CANAL
biological_process	GO:0006032	chitin catabolic process	1	4	0.25	0.837616	0.565131	1	1	CHI2_CANAL
biological_process	GO:0044206	UMP salvage	1	2	0.5	0.964741	0.340481	1	1	Q5ANN6_CANAL
biological_process	GO:0060968	obsolete regulation of gene silencing	1	3	0.333333	0.907444	0.464444	1	1	A0A1D8PRH3_CANAL
biological_process	GO:0007089	traversing start control point of mitotic cell cycle	1	3	0.333333	0.907444	0.464444	1	1	CCR4_CANAL
biological_process	GO:0042783	evasion of host immune response	1	10	0.1	0.310446	0.917978	1	1	CPH1_CANAL
biological_process	GO:0030682	mitigation of host defenses by symbiont	1	3	0.333333	0.837616	0.565131	1	1	TUP1_CANAL
biological_process	GO:0006033	chitin localization	1	2	0.5	0.964741	0.340481	1	1	CDC10_CANAL
biological_process	GO:0070583	spore membrane bending pathway	1	1	1	1	0.18787	1	1	CDC10_CANAL
biological_process	GO:0018027	peptidyl-lysine dimethylation	1	3	0.333333	0.907444	0.464444	1	1	A0A1D8PTX3_CANAL
biological_process	GO:0019287	isopentenyl diphosphate biosynthetic process, mevalonate pathway	1	3	0.333333	0.761976	0.646907	1	1	MVD1_CANAL
biological_process	GO:0000338	protein deneddylation	1	3	0.333333	0.907444	0.464444	1	1	A0A1D8PIE9_CANAL
biological_process	GO:0052391	induction by symbiont of defense-related host calcium ion flux	1	4	0.25	0.837616	0.565131	1	1	CARP3_CANAL
biological_process	GO:0019538	protein metabolic process	1	4	0.25	0.00891019	0.993101	0.875	1	CARP3_CANAL
biological_process	GO:0006465	signal peptide processing	1	13	0.0769231	0.267464	0.933431	1	1	CARP3_CANAL
biological_process	GO:1900461	positive regulation of pseudohyphal growth by positive regulation of transcription from RNA polymerase II promoter	1	1	1	1	0.18787	1	1	MCM1_CANAL
biological_process	GO:0030163	protein catabolic process	1	6	0.166667	0.571711	0.499015	1	1	CARP3_CANAL
biological_process	GO:0006656	phosphatidylcholine biosynthetic process	1	9	0.111111	0.358964	0.898942	1	1	A0A1D8PK80_CANAL
biological_process	GO:0031297	replication fork processing	1	5	0.2	0.864947	0.34232	1	1	A0A1D8PRP3_CANAL
biological_process	GO:0071333	cellular response to glucose stimulus	1	3	0.333333	0.769872	0.526538	1	1	A0A1D8PJG1_CANAL
biological_process	GO:0006490	oligosaccharide-lipid intermediate biosynthetic process	1	4	0.25	0.167826	0.964425	1	1	A0A1D8PTC1_CANAL
biological_process	GO:0009073	aromatic amino acid family biosynthetic process	1	7	0.142857	0.142917	0.971134	1	1	ARO1_CANAL
biological_process	GO:0009423	chorismate biosynthetic process	1	3	0.333333	0.907444	0.464444	1	1	ARO1_CANAL
biological_process	GO:0030968	endoplasmic reticulum unfolded protein response	1	10	0.1	0.444565	0.803411	1	1	A0A1D8PGK8_CANAL
biological_process	GO:0000183	rDNA heterochromatin assembly	1	11	0.0909091	0.167826	0.964425	1	1	A0A1D8PNK6_CANAL
biological_process	GO:0010971	positive regulation of G2/M transition of mitotic cell cycle	1	5	0.2	0.761976	0.646907	1	1	A0A1D8PM39_CANAL
biological_process	GO:0006370	7-methylguanosine mRNA capping	1	5	0.2	0.685165	0.713321	1	1	A0A1D8PDD7_CANAL
biological_process	GO:0000747	conjugation with cellular fusion	1	5	0.2	0.970148	0.0590032	1	1	CDC42_CANAL
biological_process	GO:0000055	ribosomal large subunit export from nucleus	1	13	0.0769231	0.229653	0.945976	1	1	A0A1D8PRR9_CANAL
biological_process	GO:0045727	positive regulation of translation	1	5	0.2	0.761247	0.446167	1	1	Q5A3J3_CANAL
biological_process	GO:0009438	methylglyoxal metabolic process	1	1	1	0.964741	0.340481	1	1	GRP2_CANAL
biological_process	GO:0006090	pyruvate metabolic process	1	3	0.333333	0.200318	0.919023	1	1	GRP2_CANAL
biological_process	GO:0008033	tRNA processing	1	19	0.0526316	0.0381779	0.981453	1	1	A0A1D8PSF2_CANAL
biological_process	GO:0071894	histone H2B conserved C-terminal lysine ubiquitination	1	2	0.5	0.907444	0.464444	1	1	BRE1_CANAL
biological_process	GO:0010390	histone monoubiquitination	1	2	0.5	0.964741	0.340481	1	1	BRE1_CANAL
biological_process	GO:1990758	mitotic sister chromatid biorientation	1	3	0.333333	0.761976	0.646907	1	1	A0A1D8PQB7_CANAL
biological_process	GO:0047496	vesicle transport along microtubule	1	2	0.5	0.964741	0.340481	1	1	Q5A880_CANAL
biological_process	GO:0044774	mitotic DNA integrity checkpoint signaling	1	2	0.5	0.949931	0.129731	1	1	IPL1_CANAL
biological_process	GO:0008380	RNA splicing	1	12	0.0833333	0.25704	0.817699	1	1	CCM1_CANAL
biological_process	GO:0016584	nucleosome positioning	1	8	0.125	0.539331	0.811055	1	1	Q5ADP3_CANAL
biological_process	GO:0045132	meiotic chromosome segregation	1	3	0.333333	0.948638	0.111592	1	1	Q5A5R4_CANAL
biological_process	GO:0007535	donor selection	1	2	0.5	0.964741	0.340481	1	1	MPH1_CANAL
biological_process	GO:0045003	double-strand break repair via synthesis-dependent strand annealing	1	2	0.5	0.823162	0.460669	1	1	MPH1_CANAL
biological_process	GO:0060543	negative regulation of strand invasion	1	1	1	1	0.18787	1	1	MPH1_CANAL
biological_process	GO:0006433	prolyl-tRNA aminoacylation	1	3	0.333333	0.907444	0.464444	1	1	Q59R20_CANAL
biological_process	GO:0006078	(1->6)-beta-D-glucan biosynthetic process	1	11	0.0909091	0.358964	0.898942	1	1	A0A1D8PKE1_CANAL
biological_process	GO:0007120	axial cellular bud site selection	1	1	1	1	0.18787	1	1	BUD4_CANAL
biological_process	GO:0030308	negative regulation of cell growth	1	2	0.5	0.685165	0.713321	1	1	Q5A6P9_CANAL
biological_process	GO:0006084	acetyl-CoA metabolic process	1	3	0.333333	0.39793	0.832174	1	1	Q5AMQ5_CANAL
biological_process	GO:0006415	translational termination	1	6	0.166667	0.39793	0.832174	1	1	Q59YE8_CANAL
biological_process	GO:0034198	cellular response to amino acid starvation	1	10	0.1	0.310446	0.917978	1	1	A0A1D8PQT9_CANAL
biological_process	GO:0010506	regulation of autophagy	1	4	0.25	0.761247	0.446167	1	1	Q5A2C3_CANAL
biological_process	GO:0038202	TORC1 signaling	1	4	0.25	0.783917	0.453153	1	1	A0A1D8PHX3_CANAL
biological_process	GO:1902975	mitotic DNA replication initiation	1	6	0.166667	0.685165	0.713321	1	1	A0A1D8PFE6_CANAL
biological_process	GO:0031138	negative regulation of conjugation with cellular fusion	1	2	0.5	0.761976	0.646907	1	1	Q5A6P9_CANAL
biological_process	GO:0000056	ribosomal small subunit export from nucleus	1	7	0.142857	0.610289	0.767256	1	1	A0A1D8PRR9_CANAL
biological_process	GO:0070941	eisosome assembly	1	4	0.25	0.837616	0.565131	1	1	A0A1D8PJ10_CANAL
biological_process	GO:0006012	galactose metabolic process	1	3	0.333333	0.823162	0.460669	1	1	CPH1_CANAL
biological_process	GO:0046020	negative regulation of transcription from RNA polymerase II promoter by pheromones	1	2	0.5	0.964741	0.340481	1	1	CPH1_CANAL
biological_process	GO:0019953	sexual reproduction	1	1	1	0.942333	0.09717	1	1	CPH1_CANAL
biological_process	GO:0042981	regulation of apoptotic process	1	3	0.333333	0.685165	0.713321	1	1	CRZ1_CANAL
biological_process	GO:1905143	eukaryotic translation initiation factor 2 complex assembly	1	1	1	1	0.18787	1	1	CD123_CANAL
biological_process	GO:0045948	positive regulation of translational initiation	1	3	0.333333	0.977272	0.162384	1	1	CD123_CANAL
biological_process	GO:0097316	cellular response to N-acetyl-D-glucosamine	1	7	0.142857	0.610289	0.767256	1	1	A0A1D8PQT9_CANAL
biological_process	GO:0045827	negative regulation of isoprenoid metabolic process	1	2	0.5	0.907444	0.464444	1	1	TUP1_CANAL
biological_process	GO:0071712	ER-associated misfolded protein catabolic process	1	5	0.2	0.761976	0.646907	1	1	A0A1D8PL01_CANAL
biological_process	GO:0051228	mitotic spindle disassembly	1	3	0.333333	0.907444	0.464444	1	1	IPL1_CANAL
biological_process	GO:0045041	protein import into mitochondrial intermembrane space	1	4	0.25	0.837616	0.565131	1	1	MIA40_CANAL
biological_process	GO:0022417	protein maturation by protein folding	1	1	1	1	0.18787	1	1	MIA40_CANAL
biological_process	GO:0046084	adenine biosynthetic process	1	7	0.142857	0.539331	0.811055	1	1	Q5A683_CANAL
biological_process	GO:0015918	sterol transport	1	2	0.5	0.907444	0.464444	1	1	A0A1D8PFW9_CANAL
biological_process	GO:0034244	negative regulation of transcription elongation from RNA polymerase II promoter	1	1	1	1	0.18787	1	1	RFX2_CANAL
biological_process	GO:0010768	negative regulation of transcription from RNA polymerase II promoter in response to UV-induced DNA damage	1	1	1	1	0.18787	1	1	RFX2_CANAL
biological_process	GO:0045595	regulation of cell differentiation	1	2	0.5	0.685165	0.713321	1	1	EFH1_CANAL
biological_process	GO:0016578	histone deubiquitination	1	4	0.25	0.761976	0.646907	1	1	A0A1D8PCM4_CANAL
biological_process	GO:0071963	establishment or maintenance of cell polarity regulating cell shape	1	5	0.2	0.539331	0.811055	1	1	MYO5_CANAL
biological_process	GO:1900101	regulation of endoplasmic reticulum unfolded protein response	1	2	0.5	0.907444	0.464444	1	1	SKN7_CANAL
biological_process	GO:0006518	peptide metabolic process	1	2	0.5	7.81135e-05	0.999959	0.008	1	PMIP_CANAL
biological_process	GO:0050821	protein stabilization	1	12	0.0833333	0.310446	0.917978	1	1	PMIP_CANAL
biological_process	GO:0000304	response to singlet oxygen	1	1	1	1	0.18787	1	1	SKN7_CANAL
biological_process	GO:0070086	ubiquitin-dependent endocytosis	1	8	0.125	0.539331	0.811055	1	1	Q59LZ4_CANAL
biological_process	GO:0060211	regulation of nuclear-transcribed mRNA poly(A) tail shortening	1	2	0.5	0.907444	0.464444	1	1	Q5ANK2_CANAL
biological_process	GO:0001897	cytolysis by symbiont of host cells	1	4	0.25	0.837616	0.565131	1	1	SHE3_CANAL
biological_process	GO:0048309	endoplasmic reticulum inheritance	1	3	0.333333	0.907444	0.464444	1	1	SHE3_CANAL
biological_process	GO:0071502	cellular response to temperature stimulus	1	2	0.5	0.964741	0.340481	1	1	ALS4_CANAL
biological_process	GO:0016320	endoplasmic reticulum membrane fusion	1	3	0.333333	0.907444	0.464444	1	1	A0A1D8PRK4_CANAL
biological_process	GO:0008645	hexose transmembrane transport	1	5	0.2	0.473462	0.846619	1	1	A0A1D8PQJ5_CANAL
biological_process	GO:0006646	phosphatidylethanolamine biosynthetic process	1	7	0.142857	0.610289	0.767256	1	1	A0A1D8PK80_CANAL
biological_process	GO:0009231	riboflavin biosynthetic process	1	6	0.166667	0.685165	0.713321	1	1	Q5A1Y2_CANAL
biological_process	GO:0017157	regulation of exocytosis	1	3	0.333333	0.951076	0.238024	1	1	Q59RK1_CANAL
biological_process	GO:0044806	G-quadruplex DNA unwinding	1	1	1	1	0.18787	1	1	PIF1_CANAL
biological_process	GO:0098781	ncRNA transcription	1	1	1	0.669516	0.494927	1	1	PIF1_CANAL
biological_process	GO:0032211	negative regulation of telomere maintenance via telomerase	1	2	0.5	0.964741	0.340481	1	1	PIF1_CANAL
biological_process	GO:0060988	lipid tube assembly	1	2	0.5	0.964741	0.340481	1	1	A0A1D8PN45_CANAL
biological_process	GO:0000735	removal of nonhomologous ends	1	2	0.5	0.837616	0.565131	1	1	Q5A102_CANAL
biological_process	GO:0006526	arginine biosynthetic process	1	8	0.125	0.413276	0.875496	1	1	A0A1D8PEI6_CANAL
biological_process	GO:0006354	DNA-templated transcription, elongation	1	2	0.5	0.739054	0.384137	1	1	SET2_CANAL
biological_process	GO:0060195	negative regulation of antisense RNA transcription	1	3	0.333333	0.907444	0.464444	1	1	SET2_CANAL
biological_process	GO:0071441	negative regulation of histone H3-K14 acetylation	1	2	0.5	0.964741	0.340481	1	1	SET2_CANAL
biological_process	GO:2000616	negative regulation of histone H3-K9 acetylation	1	1	1	1	0.18787	1	1	SET2_CANAL
biological_process	GO:0045128	negative regulation of reciprocal meiotic recombination	1	2	0.5	0.964741	0.340481	1	1	SET2_CANAL
biological_process	GO:0035066	positive regulation of histone acetylation	1	4	0.25	0.761976	0.646907	1	1	SET2_CANAL
biological_process	GO:1900049	regulation of histone exchange	1	1	1	0.907444	0.464444	1	1	SET2_CANAL
biological_process	GO:0070676	intralumenal vesicle formation	1	2	0.5	0.964741	0.340481	1	1	Q5A501_CANAL
biological_process	GO:0006900	vesicle budding from membrane	1	4	0.25	0.870269	0.27769	1	1	A0A1D8PL36_CANAL
biological_process	GO:0060172	astral microtubule depolymerization	1	1	1	1	0.18787	1	1	STU1_CANAL
biological_process	GO:0071474	cellular hyperosmotic response	1	3	0.333333	0.837616	0.565131	1	1	NIK1_CANAL
biological_process	GO:0051664	nuclear pore localization	1	2	0.5	0.964741	0.340481	1	1	A0A1D8PQE5_CANAL
biological_process	GO:0032008	positive regulation of TOR signaling	1	6	0.166667	0.539331	0.811055	1	1	RTC1_CANAL
biological_process	GO:0007232	osmosensory signaling pathway via Sho1 osmosensor	1	3	0.333333	0.907444	0.464444	1	1	A0A1D8PGF8_CANAL
biological_process	GO:0030833	regulation of actin filament polymerization	1	8	0.125	0.825439	0.324267	1	1	Q5A6P9_CANAL
biological_process	GO:0071507	pheromone response MAPK cascade	1	3	0.333333	0.907444	0.464444	1	1	STE7_CANAL
biological_process	GO:0043968	histone H2A acetylation	1	4	0.25	0.837616	0.565131	1	1	SWC4_CANAL
biological_process	GO:0045039	protein insertion into mitochondrial inner membrane	1	8	0.125	0.539331	0.811055	1	1	TIM13_CANAL
biological_process	GO:0000453	enzyme-directed rRNA 2'-O-methylation	1	1	1	1	0.18787	1	1	SPB1_CANAL
biological_process	GO:0031167	rRNA methylation	1	4	0.25	0.546847	0.732536	1	1	SPB1_CANAL
biological_process	GO:0070897	transcription preinitiation complex assembly	1	3	0.333333	0.905894	0.187463	1	1	Q5AHZ3_CANAL
biological_process	GO:0000266	mitochondrial fission	1	5	0.2	0.915597	0.314835	1	1	A0A1D8PKC9_CANAL
biological_process	GO:0043001	Golgi to plasma membrane protein transport	1	10	0.1	0.413276	0.875496	1	1	A0A1D8PSD4_CANAL
biological_process	GO:1903479	mitotic actomyosin contractile ring assembly actin filament organization	1	2	0.5	0.907444	0.464444	1	1	IQG1_CANAL
biological_process	GO:0007007	inner mitochondrial membrane organization	1	5	0.2	0.424166	0.78441	1	1	SHE9_CANAL
biological_process	GO:0006892	post-Golgi vesicle-mediated transport	1	6	0.166667	0.941773	0.115007	1	1	A0A1D8PFH5_CANAL
biological_process	GO:0031144	proteasome localization	1	2	0.5	0.964741	0.340481	1	1	A0A1D8PMU8_CANAL
biological_process	GO:1902977	mitotic DNA replication preinitiation complex assembly	1	3	0.333333	0.907444	0.464444	1	1	A0A1D8PHD2_CANAL
biological_process	GO:0042276	error-prone translesion synthesis	1	6	0.166667	0.685165	0.713321	1	1	A0A1D8PKE9_CANAL
biological_process	GO:0051569	regulation of histone H3-K4 methylation	1	3	0.333333	0.837616	0.565131	1	1	A0A1D8PQM5_CANAL
biological_process	GO:0071596	ubiquitin-dependent protein catabolic process via the N-end rule pathway	1	3	0.333333	0.907444	0.464444	1	1	A0A1D8PLP8_CANAL
biological_process	GO:0070301	cellular response to hydrogen peroxide	1	3	0.333333	0.837616	0.565131	1	1	A0A1D8PQT9_CANAL
biological_process	GO:0006189	'de novo' IMP biosynthetic process	1	8	0.125	0.539331	0.811055	1	1	Q59MZ5_CANAL
biological_process	GO:0045022	early endosome to late endosome transport	1	2	0.5	0.964741	0.340481	1	1	U507_CANAL
biological_process	GO:0071562	nucleus-vacuole junction assembly	1	1	1	1	0.18787	1	1	VAC8_CANAL
biological_process	GO:0042128	nitrate assimilation	1	1	1	1	0.18787	1	1	URE2_CANAL
biological_process	GO:0006361	transcription initiation from RNA polymerase I promoter	1	9	0.111111	0.413276	0.875496	1	1	A0A1D8PQM4_CANAL
biological_process	GO:0010833	telomere maintenance via telomere lengthening	1	3	0.333333	0.73941	0.50567	1	1	TBF1_CANAL
biological_process	GO:0008204	ergosterol metabolic process	1	2	0.5	0.0809774	0.978263	1	1	UPC2_CANAL
biological_process	GO:0061621	canonical glycolysis	1	3	0.333333	0.907444	0.464444	1	1	Q5AK53_CANAL
biological_process	GO:0106035	protein maturation by [4Fe-4S] cluster transfer	1	7	0.142857	0.610289	0.767256	1	1	Q5ADN0_CANAL
biological_process	GO:0032220	plasma membrane fusion involved in cytogamy	1	2	0.5	0.964741	0.340481	1	1	PRM1_CANAL
biological_process	GO:0042407	cristae formation	1	6	0.166667	0.685165	0.713321	1	1	MIC60_CANAL
biological_process	GO:1901255	nucleotide-excision repair involved in interstrand cross-link repair	1	3	0.333333	0.907444	0.464444	1	1	A0A1D8PFW0_CANAL
biological_process	GO:0010509	polyamine homeostasis	1	1	1	1	0.18787	1	1	QDR3_CANAL
biological_process	GO:0007119	budding cell isotropic bud growth	1	1	1	1	0.18787	1	1	CDC42_CANAL
biological_process	GO:0032488	Cdc42 protein signal transduction	1	2	0.5	0.964741	0.340481	1	1	CDC42_CANAL
biological_process	GO:0030031	cell projection assembly	1	2	0.5	0.977272	0.162384	1	1	CDC42_CANAL
biological_process	GO:0045921	positive regulation of exocytosis	1	2	0.5	0.964741	0.340481	1	1	CDC42_CANAL
biological_process	GO:2000222	positive regulation of pseudohyphal growth	1	1	1	1	0.035259	1	1	CDC42_CANAL
biological_process	GO:0022604	regulation of cell morphogenesis	1	2	0.5	0.833595	0.353347	1	1	CDC42_CANAL
biological_process	GO:0007096	regulation of exit from mitosis	1	5	0.2	0.974719	0.100243	1	1	CDC42_CANAL
biological_process	GO:0060178	regulation of exocyst localization	1	1	1	1	0.18787	1	1	CDC42_CANAL
biological_process	GO:0031384	regulation of initiation of mating projection growth	1	2	0.5	0.964741	0.340481	1	1	CDC42_CANAL
biological_process	GO:0031106	septin ring organization	1	2	0.5	0.96708	0.104816	1	1	CDC42_CANAL
biological_process	GO:0016572	histone phosphorylation	1	1	1	0.964741	0.340481	1	1	ATM_CANAL
biological_process	GO:0070135	beta-1,2-oligomannoside metabolic process	1	3	0.333333	0.907444	0.464444	1	1	BMT2_CANAL
biological_process	GO:0034496	multivesicular body membrane disassembly	1	1	1	1	0.18787	1	1	ATG15_CANAL
biological_process	GO:0046461	neutral lipid catabolic process	1	1	1	0.610289	0.767256	1	1	ATG15_CANAL
biological_process	GO:0070485	dehydro-D-arabinono-1,4-lactone biosynthetic process	1	2	0.5	0.964741	0.340481	1	1	ALO1_CANAL
biological_process	GO:0006767	water-soluble vitamin metabolic process	1	1	1	0.0170852	0.996501	0.981	1	ALO1_CANAL
biological_process	GO:0044407	single-species biofilm formation in or on host organism	1	5	0.2	0.761976	0.646907	1	1	A0A1D8PJZ6_CANAL
biological_process	GO:0042026	protein refolding	1	15	0.0666667	0.196589	0.956159	1	1	A0A1D8PTP9_CANAL
biological_process	GO:0051085	chaperone cofactor-dependent protein refolding	1	13	0.0769231	0.267464	0.933431	1	1	A0A1D8PTP9_CANAL
biological_process	GO:0070370	cellular heat acclimation	1	3	0.333333	0.907444	0.464444	1	1	A0A1D8PTP9_CANAL
biological_process	GO:0070414	trehalose metabolism in response to heat stress	1	2	0.5	0.964741	0.340481	1	1	A0A1D8PTP9_CANAL
biological_process	GO:0010619	adenylate cyclase-activating glucose-activated G protein-coupled receptor signaling pathway	1	2	0.5	0.964741	0.340481	1	1	Q5A6P9_CANAL
biological_process	GO:0031047	gene silencing by RNA	1	2	0.5	0.951076	0.238024	1	1	A0A1D8PTZ1_CANAL
biological_process	GO:0006048	UDP-N-acetylglucosamine biosynthetic process	1	5	0.2	0.761976	0.646907	1	1	A0A1D8PNG6_CANAL
biological_process	GO:0044855	plasma membrane raft distribution	1	1	1	1	0.18787	1	1	MYO5_CANAL
biological_process	GO:0030838	positive regulation of actin filament polymerization	1	1	1	0.833595	0.353347	1	1	MYO5_CANAL
biological_process	GO:2000601	positive regulation of Arp2/3 complex-mediated actin nucleation	1	5	0.2	0.761976	0.646907	1	1	MYO5_CANAL
biological_process	GO:0035999	tetrahydrofolate interconversion	1	7	0.142857	0.610289	0.767256	1	1	Q59SM8_CANAL
biological_process	GO:0045143	homologous chromosome segregation	1	2	0.5	0.937193	0.166405	1	1	IPL1_CANAL
biological_process	GO:1901925	negative regulation of protein import into nucleus during spindle assembly checkpoint	1	1	1	1	0.18787	1	1	IPL1_CANAL
biological_process	GO:0032465	regulation of cytokinesis	1	2	0.5	0.599925	0.645355	1	1	IPL1_CANAL
biological_process	GO:0090266	regulation of mitotic cell cycle spindle assembly checkpoint	1	2	0.5	0.907444	0.464444	1	1	IPL1_CANAL
biological_process	GO:1901673	regulation of mitotic spindle assembly	1	1	1	1	0.18787	1	1	IPL1_CANAL
biological_process	GO:0006172	ADP biosynthetic process	1	2	0.5	0.964741	0.340481	1	1	A0A1D8PQH7_CANAL
biological_process	GO:0046033	AMP metabolic process	1	3	0.333333	0.610289	0.767256	1	1	A0A1D8PQH7_CANAL
biological_process	GO:0015867	ATP transport	1	2	0.5	0.929742	0.230128	1	1	Q5AAQ7_CANAL
biological_process	GO:0031573	mitotic intra-S DNA damage checkpoint signaling	1	6	0.166667	0.685165	0.713321	1	1	Q5A5R4_CANAL
biological_process	GO:0043410	positive regulation of MAPK cascade	1	3	0.333333	0.761976	0.646907	1	1	A0A1D8PGF8_CANAL
biological_process	GO:0030474	spindle pole body duplication	1	4	0.25	0.761976	0.646907	1	1	A0A1D8PH86_CANAL
biological_process	GO:1900735	positive regulation of flocculation	1	1	1	1	0.18787	1	1	ALS1_CANAL
biological_process	GO:0006303	double-strand break repair via nonhomologous end joining	1	7	0.142857	0.539331	0.811055	1	1	A0A1D8PF81_CANAL
biological_process	GO:0000706	meiotic DNA double-strand break processing	1	3	0.333333	0.837616	0.565131	1	1	Q5A5R4_CANAL
biological_process	GO:0007130	synaptonemal complex assembly	1	6	0.166667	0.872354	0.389711	1	1	Q5A928_CANAL
biological_process	GO:0048312	intracellular distribution of mitochondria	1	2	0.5	0.964741	0.340481	1	1	CLU_CANAL
biological_process	GO:0006002	fructose 6-phosphate metabolic process	1	5	0.2	0.761976	0.646907	1	1	Q5AK53_CANAL
biological_process	GO:0000001	mitochondrion inheritance	1	10	0.1	0.413276	0.875496	1	1	A0A1D8PKC9_CANAL
biological_process	GO:0055091	phospholipid homeostasis	1	3	0.333333	0.907444	0.464444	1	1	Q5A8L5_CANAL
biological_process	GO:0010520	regulation of reciprocal meiotic recombination	1	2	0.5	0.994736	0.0489238	1	1	Q5A5R4_CANAL
biological_process	GO:0110155	NAD-cap decapping	1	2	0.5	0.964741	0.340481	1	1	DXO_CANAL
biological_process	GO:0090305	nucleic acid phosphodiester bond hydrolysis	1	3	0.333333	0.862262	0.203897	1	1	DXO_CANAL
biological_process	GO:0016239	positive regulation of macroautophagy	1	3	0.333333	0.977272	0.162384	1	1	A0A1D8PQT9_CANAL
biological_process	GO:0009164	nucleoside catabolic process	1	2	0.5	0.761976	0.646907	1	1	FHL1_CANAL
biological_process	GO:0009165	nucleotide biosynthetic process	1	2	0.5	0.271939	0.811682	1	1	FHL1_CANAL
biological_process	GO:0036003	positive regulation of transcription from RNA polymerase II promoter in response to stress	1	5	0.2	0.783917	0.453153	1	1	A0A1D8PN91_CANAL
biological_process	GO:0050708	regulation of protein secretion	1	2	0.5	0.964741	0.340481	1	1	Q59RK1_CANAL
biological_process	GO:0030836	positive regulation of actin filament depolymerization	1	2	0.5	0.907444	0.464444	1	1	Q5A6P9_CANAL
biological_process	GO:0031053	primary miRNA processing	1	2	0.5	0.964741	0.340481	1	1	A0A1D8PM79_CANAL
biological_process	GO:0034473	U1 snRNA 3'-end processing	1	5	0.2	0.761976	0.646907	1	1	A0A1D8PM79_CANAL
biological_process	GO:0034476	U5 snRNA 3'-end processing	1	6	0.166667	0.685165	0.713321	1	1	A0A1D8PM79_CANAL
biological_process	GO:0001731	formation of translation preinitiation complex	1	11	0.0909091	0.310446	0.917978	1	1	A0A1D8PM60_CANAL
biological_process	GO:0045903	positive regulation of translational fidelity	1	3	0.333333	0.907444	0.464444	1	1	A0A1D8PGY8_CANAL
biological_process	GO:0032049	cardiolipin biosynthetic process	1	4	0.25	0.837616	0.565131	1	1	A0A1D8PND1_CANAL
biological_process	GO:0002926	tRNA wobble base 5-methoxycarbonylmethyl-2-thiouridinylation	1	2	0.5	0.964741	0.340481	1	1	A0A1D8PKD5_CANAL
biological_process	GO:0006436	tryptophanyl-tRNA aminoacylation	1	2	0.5	0.964741	0.340481	1	1	Q5A3P4_CANAL
biological_process	GO:0051225	spindle assembly	1	3	0.333333	0.98579	0.0572663	1	1	Q59PZ2_CANAL
biological_process	GO:0032194	ubiquinone biosynthetic process via 3,4-dihydroxy-5-polyprenylbenzoate	1	1	1	1	0.18787	1	1	A0A1D8PCI9_CANAL
biological_process	GO:0006574	valine catabolic process	1	3	0.333333	0.907444	0.464444	1	1	A0A1D8PQ07_CANAL
biological_process	GO:0030149	sphingolipid catabolic process	1	2	0.5	0.837616	0.565131	1	1	A0A1D8PJQ9_CANAL
biological_process	GO:0031532	actin cytoskeleton reorganization	1	1	1	0.993389	0.092556	1	1	Q5AKW2_CANAL
biological_process	GO:0006997	nucleus organization	1	2	0.5	0.767697	0.397455	1	1	Q5AKW2_CANAL
biological_process	GO:0000467	exonucleolytic trimming to generate mature 3'-end of 5.8S rRNA from tricistronic rRNA transcript (SSU-rRNA, 5.8S rRNA, LSU-rRNA)	1	11	0.0909091	0.358964	0.898942	1	1	A0A1D8PCE7_CANAL
biological_process	GO:0000349	generation of catalytic spliceosome for first transesterification step	1	2	0.5	0.964741	0.340481	1	1	A0A1D8PMK6_CANAL
biological_process	GO:0010133	proline catabolic process to glutamate	1	2	0.5	0.993389	0.092556	1	1	Q5AK46_CANAL
biological_process	GO:0000244	spliceosomal tri-snRNP complex assembly	1	3	0.333333	0.907444	0.464444	1	1	Q5A322_CANAL
biological_process	GO:0044238	primary metabolic process	1	1	1	0.915272	0.0981877	1	1	A0A1D8PFI5_CANAL
biological_process	GO:0007023	post-chaperonin tubulin folding pathway	1	4	0.25	0.837616	0.565131	1	1	A0A1D8PJ63_CANAL
biological_process	GO:0007021	tubulin complex assembly	1	7	0.142857	0.610289	0.767256	1	1	A0A1D8PJ63_CANAL
biological_process	GO:0006116	NADH oxidation	1	4	0.25	0.837616	0.565131	1	1	Q59XU9_CANAL
biological_process	GO:0000754	adaptation of signaling pathway by response to pheromone involved in conjugation with cellular fusion	1	3	0.333333	0.907444	0.464444	1	1	A0A1D8PNF8_CANAL
biological_process	GO:0006283	transcription-coupled nucleotide-excision repair	1	5	0.2	0.610289	0.767256	1	1	A0A1D8PJK6_CANAL
biological_process	GO:0018342	protein prenylation	1	3	0.333333	0.685165	0.713321	1	1	A0A1D8PLY3_CANAL
biological_process	GO:0006898	receptor-mediated endocytosis	1	3	0.333333	0.783917	0.453153	1	1	A0A1D8PE70_CANAL
biological_process	GO:0000753	cell morphogenesis involved in conjugation with cellular fusion	1	6	0.166667	0.929742	0.230128	1	1	A0A1D8PH43_CANAL
biological_process	GO:0006003	fructose 2,6-bisphosphate metabolic process	1	4	0.25	0.837616	0.565131	1	1	A0A1D8PEF9_CANAL
biological_process	GO:0006000	fructose metabolic process	1	4	0.25	0.837616	0.565131	1	1	A0A1D8PEF9_CANAL
biological_process	GO:0010606	positive regulation of cytoplasmic mRNA processing body assembly	1	1	1	1	0.18787	1	1	Q5ANK2_CANAL
biological_process	GO:0009612	response to mechanical stimulus	1	1	1	0.95434	0.176838	1	1	Q5ANK2_CANAL
biological_process	GO:1903833	positive regulation of cellular response to amino acid starvation	1	6	0.166667	0.685165	0.713321	1	1	A0A1D8PQT9_CANAL
biological_process	GO:0002130	wobble position ribose methylation	1	2	0.5	0.964741	0.340481	1	1	Q5ADU0_CANAL
biological_process	GO:0006020	inositol metabolic process	1	3	0.333333	0.685165	0.713321	1	1	A0A1D8PMU9_CANAL
biological_process	GO:0051516	regulation of bipolar cell growth	1	1	1	1	0.18787	1	1	A0A1D8PMU9_CANAL
biological_process	GO:0110162	regulation of mitotic spindle elongation (spindle phase three)	1	1	1	1	0.18787	1	1	A0A1D8PMU9_CANAL
biological_process	GO:0006816	calcium ion transport	1	2	0.5	0.546847	0.732536	1	1	Q5A936_CANAL
biological_process	GO:0006950	response to stress	1	1	1	0.976731	0.0295785	1	1	A0A1D8PQP3_CANAL
biological_process	GO:0006750	glutathione biosynthetic process	1	2	0.5	0.964741	0.340481	1	1	Q5A0Z0_CANAL
biological_process	GO:0031134	sister chromatid biorientation	1	3	0.333333	0.823162	0.460669	1	1	Q59Q44_CANAL
biological_process	GO:0006006	glucose metabolic process	1	4	0.25	0.520298	0.686408	1	1	A0A1D8PLL4_CANAL
biological_process	GO:0019432	triglyceride biosynthetic process	1	4	0.25	0.837616	0.565131	1	1	Q5ALW4_CANAL
biological_process	GO:0042176	regulation of protein catabolic process	1	3	0.333333	0.314808	0.878569	1	1	Q5A3L0_CANAL
biological_process	GO:0045732	positive regulation of protein catabolic process	1	2	0.5	0.358964	0.898942	1	1	A0A1D8PGT3_CANAL
biological_process	GO:0007032	endosome organization	1	8	0.125	0.864947	0.34232	1	1	A0A1D8PRW9_CANAL
biological_process	GO:0006875	cellular metal ion homeostasis	1	5	0.2	0.122112	0.923123	1	1	A0A1D8PMD1_CANAL
biological_process	GO:0045047	protein targeting to ER	1	7	0.142857	0.177833	0.930198	1	1	A0A1D8PLY2_CANAL
biological_process	GO:0040001	establishment of mitotic spindle localization	1	2	0.5	0.973256	0.127646	1	1	A0A1D8PK53_CANAL
biological_process	GO:0006272	leading strand elongation	1	8	0.125	0.539331	0.811055	1	1	A0A1D8PQP2_CANAL
biological_process	GO:0009090	homoserine biosynthetic process	1	3	0.333333	0.837616	0.565131	1	1	A0A1D8PMB8_CANAL
biological_process	GO:0009089	lysine biosynthetic process via diaminopimelate	1	2	0.5	0.964741	0.340481	1	1	A0A1D8PMB8_CANAL
biological_process	GO:0016036	cellular response to phosphate starvation	1	2	0.5	0.964741	0.340481	1	1	A0A1D8PMD1_CANAL
biological_process	GO:0006817	phosphate ion transport	1	7	0.142857	0.473462	0.846619	1	1	Q59VZ6_CANAL
biological_process	GO:0006363	termination of RNA polymerase I transcription	1	7	0.142857	0.610289	0.767256	1	1	A0A1D8PQM4_CANAL
biological_process	GO:0006362	transcription elongation from RNA polymerase I promoter	1	8	0.125	0.413276	0.875496	1	1	A0A1D8PQM4_CANAL
biological_process	GO:0034214	protein hexamerization	1	3	0.333333	0.907444	0.464444	1	1	A0A1D8PFE6_CANAL
biological_process	GO:0006626	protein targeting to mitochondrion	1	8	0.125	0.385574	0.748282	1	1	A0A1D8PN84_CANAL
biological_process	GO:0030162	regulation of proteolysis	1	3	0.333333	0.102962	0.980998	1	1	Q5A1M1_CANAL
biological_process	GO:0070588	calcium ion transmembrane transport	1	6	0.166667	0.413276	0.875496	1	1	A0A1D8PH63_CANAL
biological_process	GO:0071038	nuclear polyadenylation-dependent tRNA catabolic process	1	10	0.1	0.413276	0.875496	1	1	A0A1D8PCE7_CANAL
biological_process	GO:0070478	nuclear-transcribed mRNA catabolic process, 3'-5' exonucleolytic nonsense-mediated decay	1	10	0.1	0.413276	0.875496	1	1	Q5A337_CANAL
biological_process	GO:0034427	nuclear-transcribed mRNA catabolic process, exonucleolytic, 3'-5'	1	9	0.111111	0.601556	0.689554	1	1	A0A1D8PCE7_CANAL
biological_process	GO:0071051	polyadenylation-dependent snoRNA 3'-end processing	1	6	0.166667	0.685165	0.713321	1	1	A0A1D8PCE7_CANAL
biological_process	GO:0000433	carbon catabolite repression of transcription from RNA polymerase II promoter by glucose	1	4	0.25	0.837616	0.565131	1	1	Q59N31_CANAL
biological_process	GO:0030007	cellular potassium ion homeostasis	1	7	0.142857	0.610289	0.767256	1	1	A0A1D8PTL7_CANAL
biological_process	GO:0006633	fatty acid biosynthetic process	1	9	0.111111	0.0309899	0.99561	0.999	1	A0A1D8PIM6_CANAL
biological_process	GO:0030026	cellular manganese ion homeostasis	1	8	0.125	0.539331	0.811055	1	1	A0A1D8PH63_CANAL
biological_process	GO:0007189	adenylate cyclase-activating G protein-coupled receptor signaling pathway	1	2	0.5	0.977272	0.162384	1	1	A0A1D8PJG1_CANAL
biological_process	GO:0051304	chromosome separation	1	2	0.5	0.900607	0.18279	1	1	Q59UE8_CANAL
biological_process	GO:0071139	resolution of recombination intermediates	1	1	1	1	0.18787	1	1	Q59UE8_CANAL
biological_process	GO:0033215	reductive iron assimilation	1	8	0.125	0.539331	0.811055	1	1	A0A1D8PQI6_CANAL
biological_process	GO:0046704	CDP metabolic process	1	1	1	0.964741	0.340481	1	1	Q5A0N3_CANAL
biological_process	GO:0006240	dCDP biosynthetic process	1	1	1	1	0.18787	1	1	Q5A0N3_CANAL
biological_process	GO:0017196	N-terminal peptidyl-methionine acetylation	1	6	0.166667	0.685165	0.713321	1	1	Q5AB99_CANAL
biological_process	GO:0005976	polysaccharide metabolic process	1	1	1	0.669581	0.45048	1	1	Q5AJ73_CANAL
biological_process	GO:0034975	protein folding in endoplasmic reticulum	1	3	0.333333	0.907444	0.464444	1	1	A0A1D8PTP9_CANAL
biological_process	GO:0035617	stress granule disassembly	1	1	1	1	0.18787	1	1	A0A1D8PTP9_CANAL
biological_process	GO:0001881	receptor recycling	1	1	1	0.951076	0.238024	1	1	A0A1D8PRW9_CANAL
biological_process	GO:0009074	aromatic amino acid family catabolic process	1	4	0.25	0.864947	0.34232	1	1	A0A1D8PCY0_CANAL
biological_process	GO:0016024	CDP-diacylglycerol biosynthetic process	1	2	0.5	0.964741	0.340481	1	1	A0A1D8PND1_CANAL
biological_process	GO:0043633	polyadenylation-dependent RNA catabolic process	1	1	1	0.601556	0.689554	1	1	Q5APC1_CANAL
biological_process	GO:0036267	invasive filamentous growth	1	4	0.25	0.599925	0.645355	1	1	A0A1D8PFH4_CANAL
biological_process	GO:0060236	regulation of mitotic spindle organization	1	2	0.5	0.998762	0.0227279	1	1	Q5A4Z1_CANAL
biological_process	GO:0018343	protein farnesylation	1	2	0.5	0.964741	0.340481	1	1	A0A1D8PLY3_CANAL
biological_process	GO:0000743	nuclear migration involved in conjugation with cellular fusion	1	3	0.333333	0.907444	0.464444	1	1	A0A1D8PSM7_CANAL
biological_process	GO:0019752	carboxylic acid metabolic process	1	10	0.1	0.000393776	0.999779	0.069	1	A0A1D8PJQ9_CANAL
biological_process	GO:0006113	fermentation	1	1	1	0.837616	0.565131	1	1	Q5A4Z0_CANAL
biological_process	GO:0032468	Golgi calcium ion homeostasis	1	2	0.5	0.964741	0.340481	1	1	A0A1D8PH63_CANAL
biological_process	GO:0032472	Golgi calcium ion transport	1	1	1	0.964741	0.340481	1	1	A0A1D8PH63_CANAL
biological_process	GO:0071421	manganese ion transmembrane transport	1	2	0.5	0.964741	0.340481	1	1	A0A1D8PH63_CANAL
biological_process	GO:0010883	regulation of lipid storage	1	1	1	1	0.18787	1	1	A0A1D8PPA2_CANAL
biological_process	GO:0030952	establishment or maintenance of cytoskeleton polarity	1	2	0.5	0.872354	0.389711	1	1	A0A1D8PFH4_CANAL
biological_process	GO:0031382	mating projection formation	1	1	1	0.993389	0.092556	1	1	A0A1D8PFH4_CANAL
biological_process	GO:0045740	positive regulation of DNA replication	1	1	1	0.837616	0.565131	1	1	A0A1D8PFX6_CANAL
biological_process	GO:0072710	response to hydroxyurea	1	1	1	1	0.035259	1	1	A0A1D8PFX6_CANAL
biological_process	GO:0031146	SCF-dependent proteasomal ubiquitin-dependent protein catabolic process	1	11	0.0909091	0.310446	0.917978	1	1	A0A1D8PDG3_CANAL
biological_process	GO:0072755	cellular response to benomyl	1	1	1	1	0.18787	1	1	A0A1D8PQT9_CANAL
biological_process	GO:0071232	cellular response to histidine	1	1	1	1	0.18787	1	1	A0A1D8PQT9_CANAL
biological_process	GO:1990451	cellular stress response to acidic pH	1	1	1	1	0.18787	1	1	A0A1D8PQT9_CANAL
biological_process	GO:0100002	negative regulation of protein kinase activity by protein phosphorylation	1	1	1	1	0.18787	1	1	A0A1D8PQT9_CANAL
biological_process	GO:0071264	positive regulation of translational initiation in response to starvation	1	1	1	1	0.18787	1	1	A0A1D8PQT9_CANAL
biological_process	GO:0071631	mating pheromone secretion involved in positive regulation of conjugation with cellular fusion	1	1	1	1	0.18787	1	1	A0A1D8PKI5_CANAL
biological_process	GO:0000770	peptide pheromone export	1	1	1	1	0.18787	1	1	A0A1D8PKI5_CANAL
biological_process	GO:0071951	conversion of methionyl-tRNA to N-formyl-methionyl-tRNA	1	1	1	1	0.18787	1	1	A0A1D8PMH2_CANAL
biological_process	GO:0090338	positive regulation of formin-nucleated actin cable assembly	1	2	0.5	0.964741	0.340481	1	1	A0A1D8PE85_CANAL
biological_process	GO:0019388	galactose catabolic process	1	6	0.166667	0.685165	0.713321	1	1	A0A1D8PF20_CANAL
biological_process	GO:1900373	positive regulation of purine nucleotide biosynthetic process	1	2	0.5	0.964741	0.340481	1	1	Q5A683_CANAL
biological_process	GO:0022900	electron transport chain	1	3	0.333333	0.00160052	0.999755	0.308	1	A0A1D8PNB3_CANAL
biological_process	GO:0019915	lipid storage	1	5	0.2	0.915597	0.314835	1	1	Q5ALW4_CANAL
biological_process	GO:0071763	nuclear membrane organization	1	1	1	0.761976	0.646907	1	1	Q5ALW4_CANAL
biological_process	GO:0006798	polyphosphate catabolic process	1	3	0.333333	0.907444	0.464444	1	1	Q59X24_CANAL
biological_process	GO:0006821	chloride transport	1	4	0.25	0.685165	0.713321	1	1	A0A1D8PTL7_CANAL
biological_process	GO:1990573	potassium ion import across plasma membrane	1	4	0.25	0.837616	0.565131	1	1	A0A1D8PTL7_CANAL
biological_process	GO:0071619	phosphorylation of RNA polymerase II C-terminal domain serine 2 residues	1	2	0.5	0.907444	0.464444	1	1	Q5A5P9_CANAL
biological_process	GO:0006797	polyphosphate metabolic process	1	6	0.166667	0.769872	0.526538	1	1	Q59VZ6_CANAL
biological_process	GO:0045471	response to ethanol	1	2	0.5	0.964741	0.340481	1	1	A0A1D8PGM1_CANAL
biological_process	GO:0031087	deadenylation-independent decapping of nuclear-transcribed mRNA	1	2	0.5	0.964741	0.340481	1	1	A0A1D8PM93_CANAL
biological_process	GO:0070475	rRNA base methylation	1	5	0.2	0.610289	0.767256	1	1	A0A1D8PF50_CANAL
biological_process	GO:0090618	DNA clamp unloading	1	4	0.25	0.837616	0.565131	1	1	A0A1D8PQP2_CANAL
biological_process	GO:0048211	Golgi vesicle docking	1	3	0.333333	0.907444	0.464444	1	1	A0A1D8PMA2_CANAL
biological_process	GO:0000730	DNA recombinase assembly	1	4	0.25	0.761976	0.646907	1	1	A0A1D8PI62_CANAL
biological_process	GO:0061982	meiosis I cell cycle process	1	1	1	0.974944	0.0507527	1	1	A0A1D8PI62_CANAL
biological_process	GO:0042148	strand invasion	1	3	0.333333	0.951076	0.238024	1	1	A0A1D8PI62_CANAL
biological_process	GO:0051307	meiotic chromosome separation	1	1	1	0.65768	0.641036	1	1	A0A1D8PCM0_CANAL
biological_process	GO:0010995	free ubiquitin chain depolymerization	1	1	1	1	0.18787	1	1	A0A1D8PIM4_CANAL
biological_process	GO:0031647	regulation of protein stability	1	1	1	0.73941	0.50567	1	1	A0A1D8PIM4_CANAL
biological_process	GO:0070199	establishment of protein localization to chromosome	1	1	1	0.964741	0.340481	1	1	Q59Q44_CANAL
biological_process	GO:0051754	meiotic sister chromatid cohesion, centromeric	1	2	0.5	0.837616	0.565131	1	1	Q59Q44_CANAL
biological_process	GO:2000786	positive regulation of autophagosome assembly	1	1	1	1	0.18787	1	1	Q59Q44_CANAL
biological_process	GO:0031107	septin ring disassembly	1	2	0.5	0.964741	0.340481	1	1	Q59Q44_CANAL
biological_process	GO:0007166	cell surface receptor signaling pathway	1	1	1	1	0.18787	1	1	A0A1D8PRG7_CANAL
biological_process	GO:0051865	protein autoubiquitination	1	4	0.25	0.761976	0.646907	1	1	Q59X25_CANAL
biological_process	GO:0006624	vacuolar protein processing	1	5	0.2	0.761976	0.646907	1	1	A0A1D8PRI2_CANAL
biological_process	GO:0016562	protein import into peroxisome matrix, receptor recycling	1	3	0.333333	0.907444	0.464444	1	1	Q59ZE6_CANAL
biological_process	GO:0098656	anion transmembrane transport	1	2	0.5	0.0170852	0.996501	0.981	1	Q59VZ6_CANAL
biological_process	GO:0002184	cytoplasmic translational termination	1	2	0.5	0.964741	0.340481	1	1	Q59YE8_CANAL
biological_process	GO:0034965	intronic box C/D RNA processing	1	5	0.2	0.761976	0.646907	1	1	A0A1D8PSF2_CANAL
biological_process	GO:0000294	nuclear-transcribed mRNA catabolic process, endonucleolytic cleavage-dependent decay	1	6	0.166667	0.685165	0.713321	1	1	A0A1D8PSF2_CANAL
biological_process	GO:0005979	regulation of glycogen biosynthetic process	1	2	0.5	0.993389	0.092556	1	1	A0A1D8PQN2_CANAL
biological_process	GO:2000144	positive regulation of DNA-templated transcription, initiation	1	1	1	0.601556	0.689554	1	1	A0A1D8PKJ2_CANAL
biological_process	GO:0006533	aspartate catabolic process	1	1	1	1	0.18787	1	1	A0A1D8PHC9_CANAL
biological_process	GO:1900191	negative regulation of single-species biofilm formation	1	2	0.5	0.964741	0.340481	1	1	Q5ADP3_CANAL
biological_process	GO:0006296	nucleotide-excision repair, DNA incision, 5'-to lesion	1	3	0.333333	0.907444	0.464444	1	1	Q5AA15_CANAL
biological_process	GO:0006449	regulation of translational termination	1	6	0.166667	0.610289	0.767256	1	1	A0A1D8PT99_CANAL
biological_process	GO:0009313	oligosaccharide catabolic process	1	3	0.333333	0.610289	0.767256	1	1	Q5AF38_CANAL
biological_process	GO:2001020	regulation of response to DNA damage stimulus	1	3	0.333333	0.826054	0.398444	1	1	Q5ADP3_CANAL
biological_process	GO:0035023	regulation of Rho protein signal transduction	1	1	1	0.993389	0.092556	1	1	A0A1D8PPS6_CANAL
biological_process	GO:0042546	cell wall biogenesis	1	3	0.333333	0.458767	0.65099	1	1	A0A1D8PK79_CANAL
biological_process	GO:0009099	valine biosynthetic process	1	5	0.2	0.761976	0.646907	1	1	A0A1D8PJF9_CANAL
biological_process	GO:0001676	long-chain fatty acid metabolic process	1	6	0.166667	0.413276	0.875496	1	1	A0A1D8PNK0_CANAL
biological_process	GO:0002943	tRNA dihydrouridine synthesis	1	1	1	1	0.18787	1	1	A0A1D8PIL3_CANAL
biological_process	GO:0006546	glycine catabolic process	1	4	0.25	0.685165	0.713321	1	1	Q59SM8_CANAL
biological_process	GO:0030989	dynein-driven meiotic oscillatory nuclear movement	1	1	1	1	0.18787	1	1	A0A1D8PMG9_CANAL
biological_process	GO:0032065	maintenance of protein location in cell cortex	1	1	1	1	0.18787	1	1	A0A1D8PMG9_CANAL
biological_process	GO:0006311	meiotic gene conversion	1	2	0.5	0.964741	0.340481	1	1	Q5A102_CANAL
biological_process	GO:0007026	negative regulation of microtubule depolymerization	1	1	1	1	0.18787	1	1	A0A1D8PIP2_CANAL
biological_process	GO:0030473	nuclear migration along microtubule	1	4	0.25	0.929742	0.230128	1	1	A0A1D8PIP2_CANAL
biological_process	GO:0000729	DNA double-strand break processing	1	2	0.5	0.915597	0.314835	1	1	A0A1D8PMZ2_CANAL
biological_process	GO:0019478	D-amino acid catabolic process	1	3	0.333333	0.907444	0.464444	1	1	A0A1D8PMX7_CANAL
biological_process	GO:0008655	pyrimidine-containing compound salvage	1	4	0.25	0.761976	0.646907	1	1	Q5ANN6_CANAL
biological_process	GO:0071035	nuclear polyadenylation-dependent rRNA catabolic process	1	7	0.142857	0.610289	0.767256	1	1	A0A1D8PCE7_CANAL
biological_process	GO:0000760	adaptation to pheromone regulating conjugation with mutual genetic exchange	1	1	1	1	0.18787	1	1	A0A1D8PH27_CANAL
biological_process	GO:0007036	vacuolar calcium ion homeostasis	1	1	1	1	0.18787	1	1	A0A1D8PJW1_CANAL
biological_process	GO:0019309	mannose catabolic process	1	1	1	1	0.18787	1	1	Q5AF38_CANAL
biological_process	GO:0090038	negative regulation of protein kinase C signaling	1	1	1	1	0.18787	1	1	A0A1D8PRQ6_CANAL
biological_process	GO:0035024	negative regulation of Rho protein signal transduction	1	1	1	1	0.18787	1	1	A0A1D8PRQ6_CANAL
biological_process	GO:0006267	pre-replicative complex assembly involved in nuclear cell cycle DNA replication	1	6	0.166667	0.685165	0.713321	1	1	A0A1D8PFE6_CANAL
biological_process	GO:0051642	centrosome localization	1	1	1	1	0.18787	1	1	Q5A880_CANAL
biological_process	GO:0051303	establishment of chromosome localization	1	1	1	0.977729	0.0791386	1	1	Q5A880_CANAL
biological_process	GO:0070940	dephosphorylation of RNA polymerase II C-terminal domain	1	4	0.25	0.837616	0.565131	1	1	A0A1D8PPG0_CANAL
biological_process	GO:0046177	D-gluconate catabolic process	1	2	0.5	0.964741	0.340481	1	1	Q59TB1_CANAL
biological_process	GO:0061688	glycolytic process via Entner-Doudoroff Pathway	1	2	0.5	0.964741	0.340481	1	1	Q59TB1_CANAL
biological_process	GO:0061641	CENP-A containing chromatin organization	1	4	0.25	0.539331	0.811055	1	1	Q5AJC3_CANAL
biological_process	GO:0006751	glutathione catabolic process	1	4	0.25	0.837616	0.565131	1	1	A0A1D8PDN2_CANAL
biological_process	GO:0071230	cellular response to amino acid stimulus	1	4	0.25	0.915597	0.314835	1	1	Q5A2C3_CANAL
biological_process	GO:0080129	proteasome core complex assembly	1	2	0.5	0.964741	0.340481	1	1	Q59Z65_CANAL
biological_process	GO:0045719	negative regulation of glycogen biosynthetic process	1	1	1	1	0.18787	1	1	A0A1D8PKQ6_CANAL
biological_process	GO:0099638	endosome to plasma membrane protein transport	1	2	0.5	0.964741	0.340481	1	1	A0A1D8PJI6_CANAL
biological_process	GO:0120236	negative regulation of posttranslational protein targeting to membrane, translocation	1	2	0.5	0.964741	0.340481	1	1	A0A1D8PL01_CANAL
biological_process	GO:0034204	lipid translocation	1	1	1	0.73941	0.50567	1	1	Q59Q40_CANAL
biological_process	GO:0046519	sphingoid metabolic process	1	1	1	0.95434	0.176838	1	1	Q59Q40_CANAL
biological_process	GO:1990180	mitochondrial tRNA 3'-end processing	1	1	1	1	0.18787	1	1	Q5A7P2_CANAL
biological_process	GO:0072684	mitochondrial tRNA 3'-trailer cleavage, endonucleolytic	1	1	1	1	0.18787	1	1	Q5A7P2_CANAL
biological_process	GO:0000388	spliceosome conformational change to release U4 (or U4atac) and U1 (or U11)	1	1	1	1	0.18787	1	1	A0A1D8PMR5_CANAL
biological_process	GO:0090502	RNA phosphodiester bond hydrolysis, endonucleolytic	1	5	0.2	0.848485	0.270366	1	1	A0A1D8PSF2_CANAL
biological_process	GO:0010620	negative regulation of transcription by transcription factor catabolism	1	2	0.5	0.964741	0.340481	1	1	Q59S64_CANAL
biological_process	GO:0006567	threonine catabolic process	1	5	0.2	0.761976	0.646907	1	1	A0A1D8PGA8_CANAL
biological_process	GO:0000097	sulfur amino acid biosynthetic process	1	1	1	0.164973	0.947706	1	1	A0A1D8PHL8_CANAL
biological_process	GO:0006538	glutamate catabolic process	1	2	0.5	0.964741	0.340481	1	1	A0A1D8PI00_CANAL
biological_process	GO:0030388	fructose 1,6-bisphosphate metabolic process	1	3	0.333333	0.907444	0.464444	1	1	Q5AK53_CANAL
biological_process	GO:0022613	ribonucleoprotein complex biogenesis	1	2	0.5	0.032956	0.97702	0.999	1	Q5ANN5_CANAL
biological_process	GO:0042989	sequestering of actin monomers	1	2	0.5	0.964741	0.340481	1	1	A0A1D8PHR2_CANAL
biological_process	GO:0071586	CAAX-box protein processing	1	2	0.5	0.964741	0.340481	1	1	A0A1D8PL01_CANAL
biological_process	GO:0032880	regulation of protein localization	1	3	0.333333	0.443866	0.747878	1	1	A0A1D8PE85_CANAL
biological_process	GO:0000375	RNA splicing, via transesterification reactions	1	1	1	0.533933	0.573533	1	1	A0A1D8PGF5_CANAL
biological_process	GO:0006611	protein export from nucleus	1	3	0.333333	0.610289	0.767256	1	1	A0A1D8PRR9_CANAL
biological_process	GO:2000728	regulation of mRNA export from nucleus in response to heat stress	1	1	1	1	0.18787	1	1	A0A1D8PQE5_CANAL
biological_process	GO:0051014	actin filament severing	1	2	0.5	0.837616	0.565131	1	1	Q5A6P9_CANAL
biological_process	GO:0035753	maintenance of DNA trinucleotide repeats	1	2	0.5	0.964741	0.340481	1	1	A0A1D8PQK7_CANAL
biological_process	GO:0034088	maintenance of mitotic sister chromatid cohesion	1	1	1	1	0.18787	1	1	A0A1D8PQK7_CANAL
biological_process	GO:0010255	glucose mediated signaling pathway	1	2	0.5	0.872354	0.389711	1	1	A0A1D8PJG1_CANAL
biological_process	GO:1903338	regulation of cell wall organization or biogenesis	1	1	1	0.929742	0.230128	1	1	A0A1D8PKB4_CANAL
biological_process	GO:1900190	regulation of single-species biofilm formation	1	1	1	0.973432	0.0626315	1	1	A0A1D8PKB4_CANAL
biological_process	GO:0006913	nucleocytoplasmic transport	1	3	0.333333	0.894169	0.15682	1	1	A0A1D8PES3_CANAL
biological_process	GO:0006464	cellular protein modification process	1	4	0.25	0.439305	0.605857	1	1	Q59WF8_CANAL
biological_process	GO:0090141	positive regulation of mitochondrial fission	1	1	1	1	0.18787	1	1	Q5A6P9_CANAL
biological_process	GO:0046579	positive regulation of Ras protein signal transduction	1	2	0.5	0.761976	0.646907	1	1	Q5A6P9_CANAL
biological_process	GO:0045761	regulation of adenylate cyclase activity	1	1	1	0.964741	0.340481	1	1	Q5A6P9_CANAL
biological_process	GO:0071480	cellular response to gamma radiation	1	2	0.5	0.964741	0.340481	1	1	A0A1D8PF81_CANAL
biological_process	GO:0071481	cellular response to X-ray	1	2	0.5	0.964741	0.340481	1	1	A0A1D8PF81_CANAL
biological_process	GO:0016570	histone modification	1	4	0.25	0.748369	0.345208	1	1	A0A1D8PQM5_CANAL
biological_process	GO:0072711	cellular response to hydroxyurea	1	1	1	1	0.18787	1	1	A0A1D8PCB2_CANAL
biological_process	GO:0000378	RNA exon ligation	1	1	1	1	0.18787	1	1	A0A1D8PS92_CANAL
biological_process	GO:0040031	snRNA modification	1	1	1	0.761976	0.646907	1	1	A0A1D8PS92_CANAL
biological_process	GO:0061025	membrane fusion	1	2	0.5	0.959599	0.0851117	1	1	A0A1D8PMA2_CANAL
biological_process	GO:0044528	regulation of mitochondrial mRNA stability	1	1	1	1	0.18787	1	1	A0A1D8PMA5_CANAL
biological_process	GO:0006955	immune response	1	2	0.5	0.685165	0.713321	1	1	A0A1D8PIN2_CANAL
biological_process	GO:0002224	toll-like receptor signaling pathway	1	2	0.5	0.964741	0.340481	1	1	A0A1D8PIN2_CANAL
biological_process	GO:0044030	regulation of DNA methylation	1	1	1	1	0.18787	1	1	Q5AJ72_CANAL
biological_process	GO:0006295	nucleotide-excision repair, DNA incision, 3'-to lesion	1	1	1	1	0.18787	1	1	A0A1D8PLU8_CANAL
biological_process	GO:0090173	regulation of synaptonemal complex assembly	1	1	1	1	0.18787	1	1	A0A1D8PDX4_CANAL
biological_process	GO:0045033	peroxisome inheritance	1	1	1	1	0.18787	1	1	Q5AH13_CANAL
biological_process	GO:0090158	endoplasmic reticulum membrane organization	1	1	1	0.951076	0.238024	1	1	A0A1D8PQC2_CANAL
biological_process	GO:0061817	endoplasmic reticulum-plasma membrane tethering	1	3	0.333333	0.907444	0.464444	1	1	A0A1D8PQC2_CANAL
biological_process	GO:0048205	COPI coating of Golgi vesicle	1	1	1	1	0.18787	1	1	Q5A7M1_CANAL
biological_process	GO:1904812	rRNA acetylation involved in maturation of SSU-rRNA	1	1	1	1	0.18787	1	1	Q5A6P2_CANAL
biological_process	GO:0051391	tRNA acetylation	1	1	1	1	0.18787	1	1	Q5A6P2_CANAL
biological_process	GO:1990355	L-methionine salvage from methionine sulphoxide	1	1	1	1	0.18787	1	1	Q5AD39_CANAL
biological_process	GO:0030643	cellular phosphate ion homeostasis	1	1	1	1	0.18787	1	1	A0A1D8PMD1_CANAL
biological_process	GO:0071243	cellular response to arsenic-containing substance	1	1	1	1	0.18787	1	1	A0A1D8PMD1_CANAL
biological_process	GO:0000073	initial mitotic spindle pole body separation	1	1	1	0.837616	0.565131	1	1	A0A1D8PT88_CANAL
biological_process	GO:0033047	regulation of mitotic sister chromatid segregation	1	1	1	0.917684	0.187543	1	1	A0A1D8PT88_CANAL
biological_process	GO:0000713	meiotic heteroduplex formation	1	1	1	1	0.18787	1	1	Q59SL0_CANAL
biological_process	GO:0031397	negative regulation of protein ubiquitination	1	1	1	1	0.18787	1	1	Q59QB9_CANAL
biological_process	GO:1903940	negative regulation of TORC2 signaling	1	1	1	1	0.18787	1	1	Q59QB9_CANAL
biological_process	GO:1900237	positive regulation of induction of conjugation with cellular fusion	1	1	1	1	0.18787	1	1	Q59QB9_CANAL
biological_process	GO:0006741	NADP biosynthetic process	1	2	0.5	0.964741	0.340481	1	1	A0A1D8PKE0_CANAL
biological_process	GO:0009437	carnitine metabolic process	1	3	0.333333	0.610289	0.767256	1	1	Q5AMQ5_CANAL
biological_process	GO:0006072	glycerol-3-phosphate metabolic process	1	4	0.25	0.761976	0.646907	1	1	Q59XU9_CANAL
biological_process	GO:0032581	ER-dependent peroxisome organization	1	1	1	1	0.18787	1	1	A0A1D8PE25_CANAL
biological_process	GO:0045046	protein import into peroxisome membrane	1	2	0.5	0.964741	0.340481	1	1	A0A1D8PE25_CANAL
biological_process	GO:0051052	regulation of DNA metabolic process	1	1	1	0.941773	0.115007	1	1	A0A1D8PDJ8_CANAL
biological_process	GO:0071705	nitrogen compound transport	1	1	1	0.678633	0.36509	1	1	A0A1D8PLF7_CANAL
biological_process	GO:0071702	organic substance transport	1	1	1	0.493589	0.551848	1	1	A0A1D8PLF7_CANAL
biological_process	GO:0030951	establishment or maintenance of microtubule cytoskeleton polarity	1	1	1	1	0.18787	1	1	A0A1D8PTZ8_CANAL
biological_process	GO:1902657	protein localization to prospore membrane	1	1	1	1	0.18787	1	1	A0A1D8PQE9_CANAL
biological_process	GO:0009202	deoxyribonucleoside triphosphate biosynthetic process	1	1	1	0.998762	0.0227279	1	1	A0A1D8PJZ1_CANAL
biological_process	GO:0042326	negative regulation of phosphorylation	1	1	1	0.610289	0.767256	1	1	A0A1D8PJZ1_CANAL
biological_process	GO:1901857	positive regulation of cellular respiration	1	2	0.5	0.964741	0.340481	1	1	A0A1D8PJZ1_CANAL
biological_process	GO:0006104	succinyl-CoA metabolic process	1	2	0.5	0.964741	0.340481	1	1	A0A1D8PTB5_CANAL
biological_process	GO:0019551	glutamate catabolic process to 2-oxoglutarate	1	1	1	1	0.18787	1	1	A0A1D8PI00_CANAL
biological_process	GO:0071453	cellular response to oxygen levels	1	1	1	0.685165	0.713321	1	1	A0A1D8PLP8_CANAL
biological_process	GO:0019413	acetate biosynthetic process	1	1	1	1	0.18787	1	1	A0A1D8PGT5_CANAL
biological_process	GO:0009968	negative regulation of signal transduction	1	1	1	0.97913	0.0513616	1	1	A0A1D8PNF8_CANAL
biological_process	GO:0070935	3'-UTR-mediated mRNA stabilization	1	1	1	1	0.18787	1	1	A0A1D8PQ55_CANAL
biological_process	GO:0071432	peptide mating pheromone maturation involved in positive regulation of conjugation with cellular fusion	1	2	0.5	0.964741	0.340481	1	1	A0A1D8PL01_CANAL
biological_process	GO:0046039	GTP metabolic process	1	1	1	0.907444	0.464444	1	1	A0A1D8PQH7_CANAL
biological_process	GO:0046041	ITP metabolic process	1	1	1	1	0.18787	1	1	A0A1D8PQH7_CANAL
biological_process	GO:0009142	nucleoside triphosphate biosynthetic process	1	1	1	0.494258	0.689834	1	1	A0A1D8PQH7_CANAL
biological_process	GO:0046168	glycerol-3-phosphate catabolic process	1	2	0.5	0.964741	0.340481	1	1	Q59XU9_CANAL
biological_process	GO:0006233	dTDP biosynthetic process	1	1	1	1	0.18787	1	1	Q59TV7_CANAL
biological_process	GO:0006227	dUDP biosynthetic process	1	1	1	1	0.18787	1	1	Q59TV7_CANAL
biological_process	GO:0071034	CUT catabolic process	1	2	0.5	0.761976	0.646907	1	1	A0A1D8PCE7_CANAL
biological_process	GO:0045056	transcytosis	1	1	1	1	0.18787	1	1	A0A1D8PMA2_CANAL
biological_process	GO:1901565	organonitrogen compound catabolic process	1	1	1	0.624711	0.43372	1	1	A0A1D8PDX5_CANAL
biological_process	GO:0016242	negative regulation of macroautophagy	1	2	0.5	0.964741	0.340481	1	1	A0A1D8PHX3_CANAL
biological_process	GO:0051598	meiotic recombination checkpoint signaling	1	1	1	1	0.18787	1	1	Q5A928_CANAL
biological_process	GO:0071108	protein K48-linked deubiquitination	1	1	1	1	0.18787	1	1	A0A1D8PIB7_CANAL
biological_process	GO:0034508	centromere complex assembly	1	1	1	0.96708	0.104816	1	1	A0A1D8PPT2_CANAL
biological_process	GO:0072318	clathrin coat disassembly	1	1	1	1	0.18787	1	1	A0A1D8PTM6_CANAL
biological_process	GO:0006532	aspartate biosynthetic process	1	2	0.5	0.964741	0.340481	1	1	Q59N40_CANAL
biological_process	GO:0034355	NAD salvage	1	1	1	1	0.18787	1	1	A0A1D8PRI0_CANAL
biological_process	GO:0030953	astral microtubule organization	1	1	1	1	0.035259	1	1	A0A1D8PE85_CANAL
biological_process	GO:0034652	extrachromosomal circular DNA localization involved in cell aging	1	1	1	1	0.18787	1	1	A0A1D8PE85_CANAL
biological_process	GO:2000251	positive regulation of actin cytoskeleton reorganization	1	1	1	1	0.18787	1	1	A0A1D8PE85_CANAL
biological_process	GO:0051127	positive regulation of actin nucleation	1	1	1	0.915597	0.314835	1	1	A0A1D8PE85_CANAL
biological_process	GO:0044818	mitotic G2/M transition checkpoint	1	1	1	0.929742	0.230128	1	1	Q5A5R4_CANAL
biological_process	GO:0010947	negative regulation of meiotic joint molecule formation	1	1	1	1	0.18787	1	1	Q5A5R4_CANAL
biological_process	GO:0090399	replicative senescence	1	1	1	1	0.18787	1	1	Q5A5R4_CANAL
biological_process	GO:0031860	telomeric 3' overhang formation	1	1	1	1	0.18787	1	1	Q5A5R4_CANAL
biological_process	GO:0070898	RNA polymerase III preinitiation complex assembly	1	1	1	1	0.18787	1	1	Q5A9D7_CANAL
biological_process	GO:0035429	gluconate transmembrane transport	1	1	1	1	0.18787	1	1	A0A1D8PND1_CANAL
biological_process	GO:0036165	invasive growth in response to heat	1	1	1	1	0.18787	1	1	A0A1D8PJG1_CANAL
biological_process	GO:0010512	negative regulation of phosphatidylinositol biosynthetic process	1	1	1	1	0.18787	1	1	A0A1D8PTP5_CANAL
biological_process	GO:0030705	cytoskeleton-dependent intracellular transport	1	2	0.5	0.995379	0.0190195	1	1	Q5A3K5_CANAL
biological_process	GO:0000432	positive regulation of transcription from RNA polymerase II promoter by glucose	1	1	1	1	0.18787	1	1	Q59SE2_CANAL
biological_process	GO:2001278	positive regulation of leucine biosynthetic process	1	1	1	1	0.18787	1	1	A0A1D8PND3_CANAL
biological_process	GO:0001100	negative regulation of exit from mitosis	1	1	1	0.994736	0.0489238	1	1	A0A1D8PHD2_CANAL
biological_process	GO:1905561	positive regulation of kinetochore assembly	1	1	1	1	0.18787	1	1	A0A1D8PHD2_CANAL
biological_process	GO:0060903	positive regulation of meiosis I	1	1	1	1	0.18787	1	1	A0A1D8PHD2_CANAL
biological_process	GO:1905263	positive regulation of meiotic DNA double-strand break formation involved in reciprocal meiotic recombination	1	1	1	1	0.18787	1	1	A0A1D8PHD2_CANAL
biological_process	GO:1904968	positive regulation of monopolar spindle attachment to meiosis I kinetochore	1	1	1	1	0.18787	1	1	A0A1D8PHD2_CANAL
biological_process	GO:0006279	premeiotic DNA replication	1	1	1	1	0.18787	1	1	A0A1D8PHD2_CANAL
biological_process	GO:0031503	protein-containing complex localization	1	1	1	0.692364	0.4174	1	1	A0A1D8PHD2_CANAL
biological_process	GO:0030999	linear element assembly	1	1	1	1	0.18787	1	1	Q59S64_CANAL
biological_process	GO:0051755	meiotic sister chromatid arm separation	1	1	1	1	0.18787	1	1	Q59S64_CANAL
biological_process	GO:0010895	negative regulation of ergosterol biosynthetic process	1	1	1	1	0.18787	1	1	Q59S64_CANAL
biological_process	GO:0010845	positive regulation of reciprocal meiotic recombination	1	1	1	1	0.18787	1	1	Q59S64_CANAL
biological_process	GO:0032933	SREBP signaling pathway	1	1	1	0.685165	0.713321	1	1	Q59S64_CANAL
biological_process	GO:0006256	UDP catabolic process	1	1	1	1	0.18787	1	1	Q5A1A4_CANAL
biological_process	GO:1904802	RITS complex assembly	1	1	1	1	0.18787	1	1	A0A1D8PPU7_CANAL
biological_process	GO:2001158	positive regulation of proline catabolic process to glutamate	1	1	1	1	0.18787	1	1	Q5AAV6_CANAL
biological_process	GO:1900364	negative regulation of mRNA polyadenylation	1	1	1	1	0.18787	1	1	A0A1D8PCH2_CANAL
biological_process	GO:1990683	DNA double-strand break attachment to nuclear envelope	1	1	1	1	0.18787	1	1	Q5ALY1_CANAL
biological_process	GO:0045898	regulation of RNA polymerase II transcription preinitiation complex assembly	1	1	1	0.65768	0.641036	1	1	A0A1D8PH70_CANAL
biological_process	GO:0006290	pyrimidine dimer repair	1	1	1	1	0.18787	1	1	A0A1D8PFM1_CANAL
biological_process	GO:0046436	D-alanine metabolic process	1	1	1	1	0.18787	1	1	A0A1D8PMX7_CANAL
biological_process	GO:1902114	D-valine metabolic process	1	1	1	1	0.18787	1	1	A0A1D8PMX7_CANAL
biological_process	GO:0044211	CTP salvage	1	1	1	1	0.18787	1	1	Q5ANN6_CANAL
biological_process	GO:0071840	cellular component organization or biogenesis	1	1	1	0.983991	0.0195836	1	1	A0A1D8PF53_CANAL
biological_process	GO:1902859	propionyl-CoA catabolic process	1	1	1	1	0.18787	1	1	A0A1D8PQ07_CANAL
biological_process	GO:0001113	transcription open complex formation at RNA polymerase II promoter	1	1	1	1	0.18787	1	1	Q5APB4_CANAL
biological_process	GO:0062022	mitotic cohesin ssDNA (lagging strand) loading	1	1	1	1	0.18787	1	1	A0A1D8PJK7_CANAL
biological_process	GO:0034643	establishment of mitochondrion localization, microtubule-mediated	1	1	1	1	0.18787	1	1	A0A1D8PKC9_CANAL
biological_process	GO:0090149	mitochondrial membrane fission	1	1	1	1	0.18787	1	1	A0A1D8PKC9_CANAL
biological_process	GO:0140572	vacuole fission	1	1	1	1	0.18787	1	1	A0A1D8PKC9_CANAL
biological_process	GO:0048034	heme O biosynthetic process	1	1	1	1	0.18787	1	1	A0A1D8PNE8_CANAL
biological_process	GO:0036292	DNA rewinding	1	1	1	1	0.18787	1	1	A0A1D8PI59_CANAL
biological_process	GO:1903342	negative regulation of meiotic DNA double-strand break formation	1	1	1	1	0.18787	1	1	A0A1D8PI59_CANAL
biological_process	GO:0006014	D-ribose metabolic process	0	1	0	0.659519	1	1	1
biological_process	GO:0009052	pentose-phosphate shunt, non-oxidative branch	0	3	0	0.535556	1	1	1
biological_process	GO:0008615	pyridoxine biosynthetic process	0	3	0	0.535556	1	1	1
biological_process	GO:0030866	cortical actin cytoskeleton organization	0	6	0	0.60489	0.573873	1	1
biological_process	GO:0032185	septin cytoskeleton organization	0	3	0	0.917779	0.201481	1	1
biological_process	GO:0046034	ATP metabolic process	0	3	0	1.27745e-05	0.999998	0	1
biological_process	GO:1902600	proton transmembrane transport	0	7	0	0.00189826	1	0.367	1
biological_process	GO:0032447	protein urmylation	0	4	0	0.434869	1	1	1
biological_process	GO:0002143	tRNA wobble position uridine thiolation	0	7	0	0.232744	1	1	1
biological_process	GO:0030433	ubiquitin-dependent ERAD pathway	0	32	0	0.000820038	1	0.14	1
biological_process	GO:0006207	'de novo' pyrimidine nucleobase biosynthetic process	0	9	0	0.153381	1	1	1
biological_process	GO:0044205	'de novo' UMP biosynthetic process	0	5	0	0.353093	1	1	1
biological_process	GO:0009220	pyrimidine ribonucleotide biosynthetic process	0	1	0	0.358964	0.898942	1	1
biological_process	GO:0000413	protein peptidyl-prolyl isomerization	0	7	0	0.232744	1	1	1
biological_process	GO:2001040	positive regulation of cellular response to drug	0	1	0	0.81213	1	1	1
biological_process	GO:0000915	actomyosin contractile ring assembly	0	3	0	0.229653	0.945976	1	1
biological_process	GO:0000917	division septum assembly	0	4	0	0.444565	0.803411	1	1
biological_process	GO:0061163	endoplasmic reticulum polarization	0	2	0	0.659519	1	1	1
biological_process	GO:1903475	mitotic actomyosin contractile ring assembly	0	6	0	0.310446	0.917978	1	1
biological_process	GO:0032259	methylation	0	26	0	0.00825133	0.996532	0.855	1
biological_process	GO:0071465	cellular response to desiccation	0	1	0	0.81213	1	1	1
biological_process	GO:0005992	trehalose biosynthetic process	0	3	0	0.535556	1	1	1
biological_process	GO:0030865	cortical cytoskeleton organization	0	4	0	0.472833	0.694258	1	1
biological_process	GO:1900240	negative regulation of phenotypic switching	0	2	0	0.659519	1	1	1
biological_process	GO:0007266	Rho protein signal transduction	0	5	0	0.899757	0.285793	1	1
biological_process	GO:0097043	histone H3-K56 acetylation	0	3	0	0.535556	1	1	1
biological_process	GO:0043618	regulation of transcription from RNA polymerase II promoter in response to stress	0	4	0	0.990898	0.0258776	1	1
biological_process	GO:0035269	protein O-linked mannosylation	0	13	0	0.0665687	1	1	1
biological_process	GO:0019430	removal of superoxide radicals	0	6	0	0.286679	1	1	1
biological_process	GO:0048869	cellular developmental process	0	2	0	0.939324	0.106265	1	1
biological_process	GO:0097320	plasma membrane tubulation	0	5	0	0.353093	1	1	1
biological_process	GO:0006094	gluconeogenesis	0	10	0	0.0820222	1	1	1
biological_process	GO:0034553	mitochondrial respiratory chain complex II assembly	0	4	0	0.434869	1	1	1
biological_process	GO:0006105	succinate metabolic process	0	1	0	0.81213	1	1	1
biological_process	GO:0042850	L-sorbose catabolic process	0	2	0	0.659519	1	1	1
biological_process	GO:0000162	tryptophan biosynthetic process	0	7	0	0.232744	1	1	1
biological_process	GO:0034243	regulation of transcription elongation from RNA polymerase II promoter	0	1	0	0.746672	0.439835	1	1
biological_process	GO:1902969	mitotic DNA replication	0	3	0	0.245387	0.912863	1	1
biological_process	GO:0006458	'de novo' protein folding	0	4	0	0.0369408	0.994587	1	1
biological_process	GO:1902953	positive regulation of ER to Golgi vesicle-mediated transport	0	4	0	0.434869	1	1	1
biological_process	GO:0070863	positive regulation of protein exit from endoplasmic reticulum	0	4	0	0.434869	1	1	1
biological_process	GO:0003400	regulation of COPII vesicle coating	0	3	0	0.535556	1	1	1
biological_process	GO:0006419	alanyl-tRNA aminoacylation	0	2	0	0.659519	1	1	1
biological_process	GO:0070143	mitochondrial alanyl-tRNA aminoacylation	0	1	0	0.81213	1	1	1
biological_process	GO:0006400	tRNA modification	0	8	0	0.110639	0.945204	1	1
biological_process	GO:2000045	regulation of G1/S transition of mitotic cell cycle	0	2	0	0.65768	0.641036	1	1
biological_process	GO:0120113	cytoplasm to vacuole transport by the NVT pathway	0	3	0	0.535556	1	1	1
biological_process	GO:0009107	lipoate biosynthetic process	0	1	0	0.81213	1	1	1
biological_process	GO:0009249	protein lipoylation	0	5	0	0.353093	1	1	1
biological_process	GO:0006108	malate metabolic process	0	6	0	0.286679	1	1	1
biological_process	GO:0072659	protein localization to plasma membrane	0	4	0	0.444565	0.803411	1	1
biological_process	GO:0035551	protein initiator methionine removal involved in protein maturation	0	1	0	0.81213	1	1	1
biological_process	GO:0060962	regulation of ribosomal protein gene transcription by RNA polymerase II	0	6	0	0.929742	0.230128	1	1
biological_process	GO:0042730	fibrinolysis	0	1	0	0.81213	1	1	1
biological_process	GO:0071629	cytoplasm protein quality control by the ubiquitin-proteasome system	0	6	0	0.286679	1	1	1
biological_process	GO:0034755	iron ion transmembrane transport	0	9	0	0.101058	1	1	1
biological_process	GO:0000032	cell wall mannoprotein biosynthetic process	0	15	0	0.0438406	1	1	1
biological_process	GO:0018345	protein palmitoylation	0	1	0	0.232744	1	1	1
biological_process	GO:0015990	electron transport coupled proton transport	0	4	0	0.434869	1	1	1
biological_process	GO:0006123	mitochondrial electron transport, cytochrome c to oxygen	0	12	0	0.0820222	1	1	1
biological_process	GO:0022904	respiratory electron transport chain	0	3	0	0.000436709	0.999965	0.077	1
biological_process	GO:0000196	cell wall integrity MAPK cascade	0	3	0	0.434869	1	1	1
biological_process	GO:0034614	cellular response to reactive oxygen species	0	4	0	0.229653	0.945976	1	1
biological_process	GO:1902660	negative regulation of glucose mediated signaling pathway	0	3	0	0.535556	1	1	1
biological_process	GO:1902413	negative regulation of mitotic cytokinesis	0	1	0	0.659519	1	1	1
biological_process	GO:1905665	positive regulation of calcium ion import across plasma membrane	0	1	0	0.81213	1	1	1
biological_process	GO:0050850	positive regulation of calcium-mediated signaling	0	2	0	0.659519	1	1	1
biological_process	GO:0031098	stress-activated protein kinase signaling cascade	0	3	0	0.124504	1	1	1
biological_process	GO:0070407	oxidation-dependent protein catabolic process	0	1	0	0.81213	1	1	1
biological_process	GO:0009085	lysine biosynthetic process	0	5	0	0.310446	0.917978	1	1
biological_process	GO:0019878	lysine biosynthetic process via aminoadipic acid	0	9	0	0.153381	1	1	1
biological_process	GO:1902626	assembly of large subunit precursor of preribosome	0	2	0	0.659519	1	1	1
biological_process	GO:0000460	maturation of 5.8S rRNA	0	11	0	0.399018	0.730639	1	1
biological_process	GO:0000054	ribosomal subunit export from nucleus	0	6	0	0.0369408	0.994587	1	1
biological_process	GO:0006482	protein demethylation	0	2	0	0.659519	1	1	1
biological_process	GO:0045292	mRNA cis splicing, via spliceosome	0	12	0	0.39793	0.832174	1	1
biological_process	GO:0045787	positive regulation of cell cycle	0	1	0	0.60489	0.573873	1	1
biological_process	GO:0033120	positive regulation of RNA splicing	0	2	0	0.535556	1	1	1
biological_process	GO:0017183	peptidyl-diphthamide biosynthetic process from peptidyl-histidine	0	8	0	0.188945	1	1	1
biological_process	GO:0006696	ergosterol biosynthetic process	0	24	0	0.0309899	0.99561	0.999	1
biological_process	GO:0051668	localization within membrane	0	2	0	0.386011	0.703908	1	1
biological_process	GO:0051170	import into nucleus	0	1	0	0.994276	0.0141061	1	1
biological_process	GO:0018230	peptidyl-L-cysteine S-palmitoylation	0	6	0	0.286679	1	1	1
biological_process	GO:0019615	catechol catabolic process, ortho-cleavage	0	1	0	0.81213	1	1	1
biological_process	GO:0019614	catechol-containing compound catabolic process	0	1	0	0.81213	1	1	1
biological_process	GO:0009712	catechol-containing compound metabolic process	0	2	0	0.535556	1	1	1
biological_process	GO:0016104	triterpenoid biosynthetic process	0	1	0	0.81213	1	1	1
biological_process	GO:0006825	copper ion transport	0	3	0	0.278414	0.897038	1	1
biological_process	GO:0034227	tRNA thio-modification	0	2	0	0.232744	1	1	1
biological_process	GO:0042254	ribosome biogenesis	0	14	0	0.00392151	0.99772	0.614	1
biological_process	GO:0006865	amino acid transport	0	4	0	0.00320213	0.999471	0.526	1
biological_process	GO:0015817	histidine transport	0	1	0	0.81213	1	1	1
biological_process	GO:0006828	manganese ion transport	0	2	0	0.907444	0.464444	1	1
biological_process	GO:0015805	S-adenosyl-L-methionine transport	0	1	0	0.81213	1	1	1
biological_process	GO:0034080	CENP-A containing chromatin assembly	0	3	0	0.434869	1	1	1
biological_process	GO:0006782	protoporphyrinogen IX biosynthetic process	0	7	0	0.232744	1	1	1
biological_process	GO:0032366	intracellular sterol transport	0	2	0	0.659519	1	1	1
biological_process	GO:0097036	regulation of plasma membrane sterol distribution	0	1	0	0.81213	1	1	1
biological_process	GO:0034982	mitochondrial protein processing	0	4	0	0.65768	0.641036	1	1
biological_process	GO:0033615	mitochondrial proton-transporting ATP synthase complex assembly	0	8	0	0.188945	1	1	1
biological_process	GO:0097053	L-kynurenine catabolic process	0	1	0	0.81213	1	1	1
biological_process	GO:0051973	positive regulation of telomerase activity	0	2	0	0.659519	1	1	1
biological_process	GO:0032203	telomere formation via telomerase	0	1	0	0.81213	1	1	1
biological_process	GO:0061157	mRNA destabilization	0	2	0	0.993837	0.016862	1	1
biological_process	GO:1903138	negative regulation of cell wall integrity MAPK cascade	0	1	0	0.81213	1	1	1
biological_process	GO:1903753	negative regulation of p38MAPK cascade	0	1	0	0.81213	1	1	1
biological_process	GO:2001125	negative regulation of translational frameshifting	0	1	0	0.81213	1	1	1
biological_process	GO:0010508	positive regulation of autophagy	0	8	0	0.601556	0.689554	1	1
biological_process	GO:0001934	positive regulation of protein phosphorylation	0	4	0	0.49433	0.770347	1	1
biological_process	GO:2000765	regulation of cytoplasmic translation	0	1	0	0.353093	1	1	1
biological_process	GO:0071470	cellular response to osmotic stress	0	12	0	0.188852	0.937908	1	1
biological_process	GO:0006973	intracellular accumulation of glycerol	0	1	0	0.81213	1	1	1
biological_process	GO:1900444	negative regulation of filamentous growth of a population of unicellular organisms in response to biotic stimulus	0	2	0	0.659519	1	1	1
biological_process	GO:1900432	negative regulation of filamentous growth of a population of unicellular organisms in response to heat	0	3	0	0.535556	1	1	1
biological_process	GO:0007231	osmosensory signaling pathway	0	3	0	0.714207	0.586724	1	1
biological_process	GO:0046173	polyol biosynthetic process	0	1	0	0.937193	0.166405	1	1
biological_process	GO:0009651	response to salt stress	0	5	0	0.286679	1	1	1
biological_process	GO:0051403	stress-activated MAPK cascade	0	2	0	0.124504	1	1	1
biological_process	GO:0001678	cellular glucose homeostasis	0	4	0	0.546847	0.732536	1	1
biological_process	GO:0051156	glucose 6-phosphate metabolic process	0	5	0	0.0665687	1	1	1
biological_process	GO:0019318	hexose metabolic process	0	2	0	0.58099	0.574375	1	1
biological_process	GO:0019344	cysteine biosynthetic process	0	4	0	0.153381	1	1	1
biological_process	GO:0009086	methionine biosynthetic process	0	10	0	0.142917	0.971134	1	1
biological_process	GO:0010134	sulfate assimilation via adenylyl sulfate reduction	0	1	0	0.81213	1	1	1
biological_process	GO:0034247	snoRNA splicing	0	2	0	0.659519	1	1	1
biological_process	GO:0045337	farnesyl diphosphate biosynthetic process	0	2	0	0.353093	1	1	1
biological_process	GO:0008299	isoprenoid biosynthetic process	0	5	0	0.102962	0.980998	1	1
biological_process	GO:2000221	negative regulation of pseudohyphal growth	0	4	0	0.434869	1	1	1
biological_process	GO:2001034	positive regulation of double-strand break repair via nonhomologous end joining	0	1	0	0.81213	1	1	1
biological_process	GO:0006356	regulation of transcription by RNA polymerase I	0	5	0	0.783917	0.453153	1	1
biological_process	GO:0001174	transcriptional start site selection at RNA polymerase II promoter	0	3	0	0.535556	1	1	1
biological_process	GO:0006021	inositol biosynthetic process	0	1	0	0.81213	1	1	1
biological_process	GO:0030497	fatty acid elongation	0	4	0	0.232744	1	1	1
biological_process	GO:0019509	L-methionine salvage from methylthioadenosine	0	5	0	0.353093	1	1	1
biological_process	GO:0019284	L-methionine salvage from S-adenosylmethionine	0	3	0	0.535556	1	1	1
biological_process	GO:0019858	cytosine metabolic process	0	1	0	0.81213	1	1	1
biological_process	GO:1903424	fluoride transmembrane transport	0	1	0	0.81213	1	1	1
biological_process	GO:1905268	negative regulation of chromatin organization	0	1	0	0.473462	0.846619	1	1
biological_process	GO:0016480	negative regulation of transcription by RNA polymerase III	0	4	0	0.434869	1	1	1
biological_process	GO:0009116	nucleoside metabolic process	0	10	0	0.0620923	0.989855	1	1
biological_process	GO:0015858	nucleoside transport	0	2	0	0.659519	1	1	1
biological_process	GO:0015986	ATP synthesis coupled proton transport	0	16	0	0.023421	1	0.998	1
biological_process	GO:1990570	GDP-mannose transmembrane transport	0	1	0	0.81213	1	1	1
biological_process	GO:0035694	mitochondrial protein catabolic process	0	1	0	0.81213	1	1	1
biological_process	GO:0033108	mitochondrial respiratory chain complex assembly	0	2	0	0.00940458	0.997733	0.887	1
biological_process	GO:0051603	proteolysis involved in cellular protein catabolic process	0	8	0	0.571286	0.502983	1	1
biological_process	GO:0051775	response to redox state	0	1	0	0.81213	1	1	1
biological_process	GO:0034551	mitochondrial respiratory chain complex III assembly	0	6	0	0.286679	1	1	1
biological_process	GO:0002253	activation of immune response	0	2	0	0.535556	1	1	1
biological_process	GO:0006388	tRNA splicing, via endonucleolytic cleavage and ligation	0	4	0	0.188945	1	1	1
biological_process	GO:0007160	cell-matrix adhesion	0	4	0	0.434869	1	1	1
biological_process	GO:0006057	mannoprotein biosynthetic process	0	2	0	0.0438406	1	1	1
biological_process	GO:0097502	mannosylation	0	8	0	0.0937639	0.974032	1	1
biological_process	GO:0009298	GDP-mannose biosynthetic process	0	3	0	0.535556	1	1	1
biological_process	GO:0048311	mitochondrion distribution	0	1	0	0.546847	0.732536	1	1
biological_process	GO:0034221	fungal-type cell wall chitin biosynthetic process	0	4	0	0.434869	1	1	1
biological_process	GO:0051223	regulation of protein transport	0	1	0	0.444565	0.803411	1	1
biological_process	GO:0018013	N-terminal peptidyl-glycine methylation	0	1	0	0.81213	1	1	1
biological_process	GO:0015903	fluconazole transport	0	2	0	0.659519	1	1	1
biological_process	GO:0015833	peptide transport	0	2	0	0.167826	0.964425	1	1
biological_process	GO:0015848	spermidine transport	0	3	0	0.535556	1	1	1
biological_process	GO:0044257	cellular protein catabolic process	0	3	0	0.6083	0.462558	1	1
biological_process	GO:0000712	resolution of meiotic recombination intermediates	0	8	0	0.188945	1	1	1
biological_process	GO:0042773	ATP synthesis coupled electron transport	0	2	0	0.000937126	0.999919	0.164	1
biological_process	GO:0006284	base-excision repair	0	6	0	0.0665687	1	1	1
biological_process	GO:0043137	DNA replication, removal of RNA primer	0	6	0	0.286679	1	1	1
biological_process	GO:0072334	UDP-galactose transmembrane transport	0	1	0	0.81213	1	1	1
biological_process	GO:0006307	DNA dealkylation involved in DNA repair	0	3	0	0.535556	1	1	1
biological_process	GO:0002188	translation reinitiation	0	3	0	0.535556	1	1	1
biological_process	GO:0006177	GMP biosynthetic process	0	2	0	0.535556	1	1	1
biological_process	GO:0046037	GMP metabolic process	0	1	0	0.535556	1	1	1
biological_process	GO:0052559	induction by symbiont of host immune response	0	4	0	0.434869	1	1	1
biological_process	GO:0033577	protein glycosylation in endoplasmic reticulum	0	1	0	0.81213	1	1	1
biological_process	GO:0042744	hydrogen peroxide catabolic process	0	6	0	0.286679	1	1	1
biological_process	GO:0000302	response to reactive oxygen species	0	2	0	0.245387	0.912863	1	1
biological_process	GO:0000495	box H/ACA RNA 3'-end processing	0	1	0	0.81213	1	1	1
biological_process	GO:1990481	mRNA pseudouridine synthesis	0	4	0	0.434869	1	1	1
biological_process	GO:0031118	rRNA pseudouridine synthesis	0	3	0	0.188945	1	1	1
biological_process	GO:0031120	snRNA pseudouridine synthesis	0	4	0	0.434869	1	1	1
biological_process	GO:0006226	dUMP biosynthetic process	0	2	0	0.659519	1	1	1
biological_process	GO:0046081	dUTP catabolic process	0	1	0	0.81213	1	1	1
biological_process	GO:1990619	histone H3-K9 deacetylation	0	1	0	0.81213	1	1	1
biological_process	GO:0031508	pericentric heterochromatin assembly	0	1	0	0.659519	1	1	1
biological_process	GO:0006122	mitochondrial electron transport, ubiquinol to cytochrome c	0	12	0	0.0820222	1	1	1
biological_process	GO:0044878	mitotic cytokinesis checkpoint signaling	0	2	0	0.659519	1	1	1
biological_process	GO:2000250	negative regulation of actin cytoskeleton reorganization	0	1	0	0.81213	1	1	1
biological_process	GO:0032091	negative regulation of protein binding	0	2	0	0.535556	1	1	1
biological_process	GO:1903473	positive regulation of mitotic actomyosin contractile ring contraction	0	2	0	0.659519	1	1	1
biological_process	GO:1902846	positive regulation of mitotic spindle elongation	0	2	0	0.659519	1	1	1
biological_process	GO:1902854	positive regulation of nuclear migration during mitotic telophase	0	1	0	0.81213	1	1	1
biological_process	GO:1905758	positive regulation of primary cell septum biogenesis	0	1	0	0.81213	1	1	1
biological_process	GO:0031028	septation initiation signaling	0	2	0	0.65768	0.641036	1	1
biological_process	GO:0006679	glucosylceramide biosynthetic process	0	3	0	0.535556	1	1	1
biological_process	GO:0007117	budding cell bud growth	0	3	0	0.864947	0.34232	1	1
biological_process	GO:0016052	carbohydrate catabolic process	0	2	0	0.0385723	0.984441	1	1
biological_process	GO:0098507	polynucleotide 5' dephosphorylation	0	1	0	0.81213	1	1	1
biological_process	GO:0046513	ceramide biosynthetic process	0	8	0	0.0820222	1	1	1
biological_process	GO:0008152	metabolic process	0	3	0	0.447538	0.586433	1	1
biological_process	GO:0030011	maintenance of cell polarity	0	9	0	0.153381	1	1	1
biological_process	GO:0000464	endonucleolytic cleavage in ITS1 upstream of 5.8S rRNA from tricistronic rRNA transcript (SSU-rRNA, 5.8S rRNA, LSU-rRNA)	0	3	0	0.535556	1	1	1
biological_process	GO:1990120	messenger ribonucleoprotein complex assembly	0	1	0	0.81213	1	1	1
biological_process	GO:0071042	nuclear polyadenylation-dependent mRNA catabolic process	0	4	0	0.434869	1	1	1
biological_process	GO:0046475	glycerophospholipid catabolic process	0	8	0	0.188945	1	1	1
biological_process	GO:0001407	glycerophosphodiester transmembrane transport	0	3	0	0.535556	1	1	1
biological_process	GO:0046942	carboxylic acid transport	0	3	0	0.0151844	0.998102	0.975	1
biological_process	GO:0070525	tRNA threonylcarbamoyladenosine metabolic process	0	2	0	0.124504	1	1	1
biological_process	GO:0042542	response to hydrogen peroxide	0	5	0	0.539331	0.811055	1	1
biological_process	GO:0052155	modulation by symbiont of host cell-mediated immune response	0	2	0	0.659519	1	1	1
biological_process	GO:0045338	farnesyl diphosphate metabolic process	0	1	0	0.286679	1	1	1
biological_process	GO:0031023	microtubule organizing center organization	0	1	0	0.65768	0.641036	1	1
biological_process	GO:0051012	microtubule sliding	0	1	0	0.81213	1	1	1
biological_process	GO:0051312	chromosome decondensation	0	1	0	0.81213	1	1	1
biological_process	GO:1902499	positive regulation of protein autoubiquitination	0	1	0	0.81213	1	1	1
biological_process	GO:0060261	positive regulation of transcription initiation from RNA polymerase II promoter	0	3	0	0.358964	0.898942	1	1
biological_process	GO:0046677	response to antibiotic	0	2	0	0.659519	1	1	1
biological_process	GO:0046898	response to cycloheximide	0	2	0	0.535556	1	1	1
biological_process	GO:1990577	C-terminal protein demethylation	0	1	0	0.81213	1	1	1
biological_process	GO:0042766	nucleosome mobilization	0	5	0	0.353093	1	1	1
biological_process	GO:1903097	regulation of CENP-A containing nucleosome assembly	0	1	0	0.81213	1	1	1
biological_process	GO:0035065	regulation of histone acetylation	0	1	0	0.610289	0.767256	1	1
biological_process	GO:0032006	regulation of TOR signaling	0	1	0	0.949931	0.129731	1	1
biological_process	GO:0051383	kinetochore organization	0	1	0	0.992172	0.0456604	1	1
biological_process	GO:0015936	coenzyme A metabolic process	0	1	0	0.823162	0.460669	1	1
biological_process	GO:0045861	negative regulation of proteolysis	0	2	0	0.286679	1	1	1
biological_process	GO:0009117	nucleotide metabolic process	0	4	0	0.104123	0.931137	1	1
biological_process	GO:0010043	response to zinc ion	0	1	0	0.659519	1	1	1
biological_process	GO:0002949	tRNA threonylcarbamoyladenosine modification	0	3	0	0.434869	1	1	1
biological_process	GO:0006555	methionine metabolic process	0	3	0	0.121431	0.976579	1	1
biological_process	GO:0045454	cell redox homeostasis	0	16	0	0.0355749	1	1	1
biological_process	GO:0018008	N-terminal peptidyl-glycine N-myristoylation	0	1	0	0.81213	1	1	1
biological_process	GO:0044001	migration in host	0	1	0	0.81213	1	1	1
biological_process	GO:0140053	mitochondrial gene expression	0	1	0	0.00502514	0.998873	0.671	1
biological_process	GO:0048255	mRNA stabilization	0	1	0	0.964741	0.340481	1	1
biological_process	GO:0019853	L-ascorbic acid biosynthetic process	0	1	0	0.81213	1	1	1
biological_process	GO:0019448	L-cysteine catabolic process	0	3	0	0.535556	1	1	1
biological_process	GO:0019451	L-cysteine catabolic process to pyruvate, using cysteine dioxygenase	0	1	0	0.81213	1	1	1
biological_process	GO:0018171	peptidyl-cysteine oxidation	0	1	0	0.81213	1	1	1
biological_process	GO:0061407	positive regulation of transcription from RNA polymerase II promoter in response to hydrogen peroxide	0	1	0	0.81213	1	1	1
biological_process	GO:0015976	carbon utilization	0	4	0	0.434869	1	1	1
biological_process	GO:0061077	chaperone-mediated protein folding	0	5	0	0.0439807	0.993326	1	1
biological_process	GO:1901710	regulation of homoserine biosynthetic process	0	1	0	0.81213	1	1	1
biological_process	GO:0006073	cellular glucan metabolic process	0	4	0	0.38158	0.768212	1	1
biological_process	GO:0009251	glucan catabolic process	0	6	0	0.153381	1	1	1
biological_process	GO:0010142	farnesyl diphosphate biosynthetic process, mevalonate pathway	0	3	0	0.535556	1	1	1
biological_process	GO:1900039	positive regulation of cellular response to hypoxia	0	1	0	0.81213	1	1	1
biological_process	GO:2000640	positive regulation of SREBP signaling pathway	0	1	0	0.81213	1	1	1
biological_process	GO:0006183	GTP biosynthetic process	0	2	0	0.659519	1	1	1
biological_process	GO:0043409	negative regulation of MAPK cascade	0	3	0	0.434869	1	1	1
biological_process	GO:0090029	negative regulation of pheromone-dependent signal transduction involved in conjugation with cellular fusion	0	1	0	0.81213	1	1	1
biological_process	GO:2000785	regulation of autophagosome assembly	0	2	0	0.907444	0.464444	1	1
biological_process	GO:1902983	DNA strand elongation involved in mitotic DNA replication	0	1	0	0.535556	1	1	1
biological_process	GO:0009187	cyclic nucleotide metabolic process	0	1	0	0.535556	1	1	1
biological_process	GO:0015693	magnesium ion transport	0	3	0	0.434869	1	1	1
biological_process	GO:0045016	mitochondrial magnesium ion transmembrane transport	0	2	0	0.535556	1	1	1
biological_process	GO:0110051	metabolite repair	0	1	0	0.81213	1	1	1
biological_process	GO:0046496	nicotinamide nucleotide metabolic process	0	2	0	0.72231	0.491095	1	1
biological_process	GO:0007009	plasma membrane organization	0	4	0	0.49433	0.770347	1	1
biological_process	GO:0006013	mannose metabolic process	0	3	0	0.837616	0.565131	1	1
biological_process	GO:0006166	purine ribonucleoside salvage	0	3	0	0.434869	1	1	1
biological_process	GO:0033621	nuclear-transcribed mRNA catabolic process, meiosis-specific transcripts	0	2	0	0.659519	1	1	1
biological_process	GO:0071050	sno(s)RNA polyadenylation	0	1	0	0.81213	1	1	1
biological_process	GO:0005993	trehalose catabolic process	0	2	0	0.535556	1	1	1
biological_process	GO:0035351	heme transmembrane transport	0	1	0	0.81213	1	1	1
biological_process	GO:0031579	membrane raft organization	0	2	0	0.610289	0.767256	1	1
biological_process	GO:0062200	RAM/MOR signaling pathway	0	1	0	0.81213	1	1	1
biological_process	GO:2000100	regulation of establishment or maintenance of bipolar cell polarity regulating cell shape	0	2	0	0.535556	1	1	1
biological_process	GO:0044571	[2Fe-2S] cluster assembly	0	4	0	0.434869	1	1	1
biological_process	GO:0070903	mitochondrial tRNA thio-modification	0	1	0	0.659519	1	1	1
biological_process	GO:0006274	DNA replication termination	0	3	0	0.434869	1	1	1
biological_process	GO:0072671	mitochondria-associated ubiquitin-dependent protein catabolic process	0	7	0	0.232744	1	1	1
biological_process	GO:0051974	negative regulation of telomerase activity	0	3	0	0.535556	1	1	1
biological_process	GO:0070651	nonfunctional rRNA decay	0	12	0	0.0820222	1	1	1
biological_process	GO:1900182	positive regulation of protein localization to nucleus	0	3	0	0.535556	1	1	1
biological_process	GO:0072665	protein localization to vacuole	0	3	0	0.983072	0.035293	1	1
biological_process	GO:0030970	retrograde protein transport, ER to cytosol	0	4	0	0.434869	1	1	1
biological_process	GO:0006491	N-glycan processing	0	5	0	0.353093	1	1	1
biological_process	GO:0010265	SCF complex assembly	0	1	0	0.81213	1	1	1
biological_process	GO:0019280	L-methionine biosynthetic process from homoserine via O-acetyl-L-homoserine and cystathionine	0	1	0	0.81213	1	1	1
biological_process	GO:0031119	tRNA pseudouridine synthesis	0	2	0	0.659519	1	1	1
biological_process	GO:0000455	enzyme-directed rRNA pseudouridine synthesis	0	4	0	0.434869	1	1	1
biological_process	GO:0048239	negative regulation of DNA recombination at telomere	0	1	0	0.81213	1	1	1
biological_process	GO:0036047	peptidyl-lysine demalonylation	0	1	0	0.81213	1	1	1
biological_process	GO:0036049	peptidyl-lysine desuccinylation	0	1	0	0.81213	1	1	1
biological_process	GO:0061698	protein deglutarylation	0	1	0	0.81213	1	1	1
biological_process	GO:2001211	negative regulation of isopentenyl diphosphate biosynthetic process, mevalonate pathway	0	1	0	0.81213	1	1	1
biological_process	GO:1903379	regulation of mitotic chromosome condensation	0	2	0	0.659519	1	1	1
biological_process	GO:0000316	sulfite transport	0	2	0	0.535556	1	1	1
biological_process	GO:0006446	regulation of translational initiation	0	5	0	0.86597	0.306612	1	1
biological_process	GO:0070843	misfolded protein transport	0	2	0	0.659519	1	1	1
biological_process	GO:0031204	posttranslational protein targeting to membrane, translocation	0	9	0	0.358964	0.898942	1	1
biological_process	GO:0044743	protein transmembrane import into intracellular organelle	0	1	0	0.838594	0.275499	1	1
biological_process	GO:0006616	SRP-dependent cotranslational protein targeting to membrane, translocation	0	7	0	0.232744	1	1	1
biological_process	GO:0032456	endocytic recycling	0	6	0	0.539331	0.811055	1	1
biological_process	GO:0034499	late endosome to Golgi transport	0	1	0	0.81213	1	1	1
biological_process	GO:0000494	box C/D RNA 3'-end processing	0	3	0	0.535556	1	1	1
biological_process	GO:1902570	protein localization to nucleolus	0	1	0	0.659519	1	1	1
biological_process	GO:0000452	snoRNA guided rRNA 2'-O-methylation	0	3	0	0.535556	1	1	1
biological_process	GO:0050790	regulation of catalytic activity	0	5	0	0.640071	0.460652	1	1
biological_process	GO:0030071	regulation of mitotic metaphase/anaphase transition	0	3	0	0.837432	0.295342	1	1
biological_process	GO:1905216	positive regulation of RNA binding	0	1	0	0.81213	1	1	1
biological_process	GO:0006659	phosphatidylserine biosynthetic process	0	3	0	0.535556	1	1	1
biological_process	GO:0016540	protein autoprocessing	0	2	0	0.659519	1	1	1
biological_process	GO:0000372	Group I intron splicing	0	2	0	0.659519	1	1	1
biological_process	GO:0006264	mitochondrial DNA replication	0	3	0	0.434869	1	1	1
biological_process	GO:0000965	mitochondrial RNA 3'-end processing	0	1	0	0.964741	0.340481	1	1
biological_process	GO:0000957	mitochondrial RNA catabolic process	0	1	0	0.81213	1	1	1
biological_process	GO:0006904	vesicle docking involved in exocytosis	0	8	0	0.188945	1	1	1
biological_process	GO:0006903	vesicle targeting	0	1	0	0.473462	0.846619	1	1
biological_process	GO:1904983	glycine import into mitochondrion	0	1	0	0.81213	1	1	1
biological_process	GO:0042789	mRNA transcription by RNA polymerase II	0	2	0	0.659519	1	1	1
biological_process	GO:1900050	negative regulation of histone exchange	0	1	0	0.81213	1	1	1
biological_process	GO:0034728	nucleosome organization	0	2	0	0.93449	0.123255	1	1
biological_process	GO:0000025	maltose catabolic process	0	3	0	0.535556	1	1	1
biological_process	GO:0043090	amino acid import	0	2	0	0.286679	1	1	1
biological_process	GO:1903364	positive regulation of cellular protein catabolic process	0	3	0	0.124504	1	1	1
biological_process	GO:0034203	glycolipid translocation	0	1	0	0.81213	1	1	1
biological_process	GO:0072741	protein localization to cell division site	0	1	0	0.434869	1	1	1
biological_process	GO:0030100	regulation of endocytosis	0	1	0	0.286679	1	1	1
biological_process	GO:0032790	ribosome disassembly	0	3	0	0.535556	1	1	1
biological_process	GO:0006386	termination of RNA polymerase III transcription	0	10	0	0.124504	1	1	1
biological_process	GO:0006384	transcription initiation from RNA polymerase III promoter	0	11	0	0.310446	0.917978	1	1
biological_process	GO:0042797	tRNA transcription by RNA polymerase III	0	10	0	0.124504	1	1	1
biological_process	GO:0009228	thiamine biosynthetic process	0	4	0	0.434869	1	1	1
biological_process	GO:0052837	thiazole biosynthetic process	0	1	0	0.81213	1	1	1
biological_process	GO:0090297	positive regulation of mitochondrial DNA replication	0	1	0	0.81213	1	1	1
biological_process	GO:0051096	positive regulation of helicase activity	0	2	0	0.659519	1	1	1
biological_process	GO:0007159	leukocyte cell-cell adhesion	0	1	0	0.81213	1	1	1
biological_process	GO:0045916	negative regulation of complement activation	0	1	0	0.81213	1	1	1
biological_process	GO:0032119	sequestering of zinc ion	0	2	0	0.659519	1	1	1
biological_process	GO:0052085	suppression by symbiont of host T-cell mediated immune response	0	1	0	0.81213	1	1	1
biological_process	GO:0006730	one-carbon metabolic process	0	9	0	0.229653	0.945976	1	1
biological_process	GO:0019510	S-adenosylhomocysteine catabolic process	0	1	0	0.81213	1	1	1
biological_process	GO:0033353	S-adenosylmethionine cycle	0	1	0	0.434869	1	1	1
biological_process	GO:0006641	triglyceride metabolic process	0	5	0	0.196589	0.956159	1	1
biological_process	GO:0071451	cellular response to superoxide	0	2	0	0.286679	1	1	1
biological_process	GO:0071454	cellular response to anoxia	0	1	0	0.81213	1	1	1
biological_process	GO:1904902	ESCRT III complex assembly	0	1	0	0.81213	1	1	1
biological_process	GO:2001208	negative regulation of transcription elongation by RNA polymerase I	0	1	0	0.81213	1	1	1
biological_process	GO:2001209	positive regulation of transcription elongation from RNA polymerase I promoter	0	2	0	0.659519	1	1	1
biological_process	GO:2000232	regulation of rRNA processing	0	4	0	0.434869	1	1	1
biological_process	GO:0090262	regulation of transcription-coupled nucleotide-excision repair	0	2	0	0.659519	1	1	1
biological_process	GO:0009229	thiamine diphosphate biosynthetic process	0	3	0	0.535556	1	1	1
biological_process	GO:0036265	RNA (guanine-N7)-methylation	0	1	0	0.535556	1	1	1
biological_process	GO:0090114	COPII-coated vesicle budding	0	1	0	0.65768	0.641036	1	1
biological_process	GO:1904263	positive regulation of TORC1 signaling	0	4	0	0.434869	1	1	1
biological_process	GO:0032527	protein exit from endoplasmic reticulum	0	1	0	0.188945	1	1	1
biological_process	GO:0006801	superoxide metabolic process	0	1	0	0.286679	1	1	1
biological_process	GO:0052164	symbiont defense to host-produced reactive oxygen species	0	1	0	0.81213	1	1	1
biological_process	GO:0006276	plasmid maintenance	0	1	0	0.81213	1	1	1
biological_process	GO:0006970	response to osmotic stress	0	7	0	0.107831	0.962115	1	1
biological_process	GO:0097056	selenocysteinyl-tRNA(Sec) biosynthetic process	0	1	0	0.81213	1	1	1
biological_process	GO:0006434	seryl-tRNA aminoacylation	0	2	0	0.659519	1	1	1
biological_process	GO:0006383	transcription by RNA polymerase III	0	6	0	0.0151844	0.998102	0.975	1
biological_process	GO:0061024	membrane organization	0	4	0	0.811364	0.250205	1	1
biological_process	GO:0007006	mitochondrial membrane organization	0	2	0	0.441411	0.720517	1	1
biological_process	GO:0006998	nuclear envelope organization	0	4	0	0.473462	0.846619	1	1
biological_process	GO:0016050	vesicle organization	0	3	0	0.966177	0.0643048	1	1
biological_process	GO:0006231	dTMP biosynthetic process	0	2	0	0.659519	1	1	1
biological_process	GO:0006275	regulation of DNA replication	0	2	0	0.988973	0.0321572	1	1
biological_process	GO:0090465	arginine homeostasis	0	1	0	0.81213	1	1	1
biological_process	GO:0090464	histidine homeostasis	0	1	0	0.81213	1	1	1
biological_process	GO:0090463	lysine homeostasis	0	1	0	0.81213	1	1	1
biological_process	GO:0046488	phosphatidylinositol metabolic process	0	3	0	0.618681	0.514429	1	1
biological_process	GO:2000114	regulation of establishment of cell polarity	0	1	0	0.659519	1	1	1
biological_process	GO:0006294	nucleotide-excision repair, preincision complex assembly	0	1	0	0.81213	1	1	1
biological_process	GO:2000677	regulation of transcription regulatory region DNA binding	0	1	0	0.659519	1	1	1
biological_process	GO:0048015	phosphatidylinositol-mediated signaling	0	4	0	0.353093	1	1	1
biological_process	GO:0006481	C-terminal protein methylation	0	3	0	0.535556	1	1	1
biological_process	GO:0030974	thiamine pyrophosphate transmembrane transport	0	2	0	0.659519	1	1	1
biological_process	GO:0031322	ascospore-type prospore-specific spindle pole body remodeling	0	1	0	0.81213	1	1	1
biological_process	GO:0006657	CDP-choline pathway	0	1	0	0.81213	1	1	1
biological_process	GO:0048194	Golgi vesicle budding	0	2	0	0.907444	0.464444	1	1
biological_process	GO:2001246	negative regulation of phosphatidylcholine biosynthetic process	0	1	0	0.81213	1	1	1
biological_process	GO:1901352	negative regulation of phosphatidylglycerol biosynthetic process	0	1	0	0.81213	1	1	1
biological_process	GO:0031591	wybutosine biosynthetic process	0	4	0	0.434869	1	1	1
biological_process	GO:0042791	5S class rRNA transcription by RNA polymerase III	0	3	0	0.535556	1	1	1
biological_process	GO:0031123	RNA 3'-end processing	0	2	0	0.739054	0.384137	1	1
biological_process	GO:0071630	nuclear protein quality control by the ubiquitin-proteasome system	0	4	0	0.434869	1	1	1
biological_process	GO:0071455	cellular response to hyperoxia	0	1	0	0.81213	1	1	1
biological_process	GO:0042275	error-free postreplication DNA repair	0	1	0	0.81213	1	1	1
biological_process	GO:0070987	error-free translesion synthesis	0	4	0	0.434869	1	1	1
biological_process	GO:0016574	histone ubiquitination	0	2	0	0.685165	0.713321	1	1
biological_process	GO:0042138	meiotic DNA double-strand break formation	0	4	0	0.915597	0.314835	1	1
biological_process	GO:0031571	mitotic G1 DNA damage checkpoint signaling	0	2	0	0.659519	1	1	1
biological_process	GO:2000639	negative regulation of SREBP signaling pathway	0	2	0	0.659519	1	1	1
biological_process	GO:0070534	protein K63-linked ubiquitination	0	4	0	0.434869	1	1	1
biological_process	GO:0090089	regulation of dipeptide transport	0	1	0	0.81213	1	1	1
biological_process	GO:0120174	stress-induced homeostatically regulated protein degradation pathway	0	3	0	0.535556	1	1	1
biological_process	GO:0070901	mitochondrial tRNA methylation	0	1	0	0.81213	1	1	1
biological_process	GO:0002939	tRNA N1-guanine methylation	0	2	0	0.659519	1	1	1
biological_process	GO:0140291	peptidyl-glutamate ADP-deribosylation	0	1	0	0.81213	1	1	1
biological_process	GO:0007531	mating type determination	0	1	0	0.973256	0.127646	1	1
biological_process	GO:0007532	regulation of mating-type specific transcription, DNA-templated	0	1	0	0.81213	1	1	1
biological_process	GO:0044208	'de novo' AMP biosynthetic process	0	2	0	0.659519	1	1	1
biological_process	GO:0006106	fumarate metabolic process	0	5	0	0.685165	0.713321	1	1
biological_process	GO:0046040	IMP metabolic process	0	1	0	0.413276	0.875496	1	1
biological_process	GO:0006873	cellular ion homeostasis	0	5	0	0.128344	0.914863	1	1
biological_process	GO:0005977	glycogen metabolic process	0	3	0	0.601556	0.689554	1	1
biological_process	GO:0032515	negative regulation of phosphoprotein phosphatase activity	0	3	0	0.353093	1	1	1
biological_process	GO:1905183	negative regulation of protein serine/threonine phosphatase activity	0	3	0	0.535556	1	1	1
biological_process	GO:0032516	positive regulation of phosphoprotein phosphatase activity	0	2	0	0.659519	1	1	1
biological_process	GO:1900180	regulation of protein localization to nucleus	0	1	0	0.353093	1	1	1
biological_process	GO:0005978	glycogen biosynthetic process	0	4	0	0.872354	0.389711	1	1
biological_process	GO:0016539	intein-mediated protein splicing	0	1	0	0.81213	1	1	1
biological_process	GO:0006011	UDP-glucose metabolic process	0	1	0	0.81213	1	1	1
biological_process	GO:0006516	glycoprotein catabolic process	0	2	0	0.434869	1	1	1
biological_process	GO:0006517	protein deglycosylation	0	3	0	0.286679	1	1	1
biological_process	GO:0009204	deoxyribonucleoside triphosphate catabolic process	0	1	0	0.659519	1	1	1
biological_process	GO:0009143	nucleoside triphosphate catabolic process	0	1	0	0.659519	1	1	1
biological_process	GO:0009653	anatomical structure morphogenesis	0	1	0	0.796103	0.287143	1	1
biological_process	GO:0030154	cell differentiation	0	3	0	0.847618	0.24188	1	1
biological_process	GO:0045991	carbon catabolite activation of transcription	0	2	0	0.973256	0.127646	1	1
biological_process	GO:0071456	cellular response to hypoxia	0	1	0	0.535556	1	1	1
biological_process	GO:0045821	positive regulation of glycolytic process	0	2	0	0.659519	1	1	1
biological_process	GO:0046166	glyceraldehyde-3-phosphate biosynthetic process	0	1	0	0.81213	1	1	1
biological_process	GO:0019563	glycerol catabolic process	0	3	0	0.535556	1	1	1
biological_process	GO:0010636	positive regulation of mitochondrial fusion	0	2	0	0.659519	1	1	1
biological_process	GO:0010954	positive regulation of protein processing	0	1	0	0.81213	1	1	1
biological_process	GO:0031126	sno(s)RNA 3'-end processing	0	3	0	0.229653	0.945976	1	1
biological_process	GO:0098703	calcium ion import across plasma membrane	0	2	0	0.535556	1	1	1
biological_process	GO:0006666	3-keto-sphinganine metabolic process	0	1	0	0.81213	1	1	1
biological_process	GO:0030148	sphingolipid biosynthetic process	0	11	0	0.206788	0.905363	1	1
biological_process	GO:0071528	tRNA re-export from nucleus	0	2	0	0.659519	1	1	1
biological_process	GO:0000715	nucleotide-excision repair, DNA damage recognition	0	1	0	0.81213	1	1	1
biological_process	GO:0033683	nucleotide-excision repair, DNA incision	0	3	0	0.872354	0.389711	1	1
biological_process	GO:0097250	mitochondrial respirasome assembly	0	3	0	0.535556	1	1	1
biological_process	GO:0010155	regulation of proton transport	0	1	0	0.81213	1	1	1
biological_process	GO:0070509	calcium ion import	0	2	0	0.353093	1	1	1
biological_process	GO:0051481	negative regulation of cytosolic calcium ion concentration	0	1	0	0.81213	1	1	1
biological_process	GO:0055088	lipid homeostasis	0	15	0	0.0736158	0.987494	1	1
biological_process	GO:0001765	membrane raft assembly	0	2	0	0.659519	1	1	1
biological_process	GO:0020028	endocytic hemoglobin import into cell	0	1	0	0.81213	1	1	1
biological_process	GO:0006112	energy reserve metabolic process	0	1	0	0.546847	0.732536	1	1
biological_process	GO:0046279	3,4-dihydroxybenzoate biosynthetic process	0	1	0	0.81213	1	1	1
biological_process	GO:0019631	quinate catabolic process	0	1	0	0.81213	1	1	1
biological_process	GO:0006335	DNA replication-dependent chromatin assembly	0	5	0	0.353093	1	1	1
biological_process	GO:0001207	obsolete histone displacement	0	2	0	0.535556	1	1	1
biological_process	GO:0033523	histone H2B ubiquitination	0	1	0	0.761976	0.646907	1	1
biological_process	GO:0006337	nucleosome disassembly	0	1	0	0.81213	1	1	1
biological_process	GO:0001932	regulation of protein phosphorylation	0	1	0	0.668258	0.485529	1	1
biological_process	GO:0032120	ascospore-type prospore membrane formation	0	2	0	0.761976	0.646907	1	1
biological_process	GO:0030259	lipid glycosylation	0	1	0	0.81213	1	1	1
biological_process	GO:0000423	mitophagy	0	3	0	0.535556	1	1	1
biological_process	GO:0032147	activation of protein kinase activity	0	1	0	0.659519	1	1	1
biological_process	GO:0070136	beta-1,2-oligomannoside biosynthetic process	0	2	0	0.659519	1	1	1
biological_process	GO:0046874	quinolinate metabolic process	0	1	0	0.837616	0.565131	1	1
biological_process	GO:0006146	adenine catabolic process	0	1	0	0.81213	1	1	1
biological_process	GO:0043103	hypoxanthine salvage	0	1	0	0.81213	1	1	1
biological_process	GO:0009168	purine ribonucleoside monophosphate biosynthetic process	0	1	0	0.167826	0.964425	1	1
biological_process	GO:0002084	protein depalmitoylation	0	2	0	0.659519	1	1	1
biological_process	GO:0006811	ion transport	0	2	0	2.35741e-06	0.999999	0	1
biological_process	GO:0071257	cellular response to electrical stimulus	0	2	0	0.659519	1	1	1
biological_process	GO:0009652	thigmotropism	0	2	0	0.659519	1	1	1
biological_process	GO:0019243	methylglyoxal catabolic process to D-lactate via S-lactoyl-glutathione	0	1	0	0.81213	1	1	1
biological_process	GO:0008637	apoptotic mitochondrial changes	0	1	0	0.81213	1	1	1
biological_process	GO:0034514	mitochondrial unfolded protein response	0	1	0	0.81213	1	1	1
biological_process	GO:0051604	protein maturation	0	2	0	0.179056	0.891241	1	1
biological_process	GO:0034620	cellular response to unfolded protein	0	7	0	0.188852	0.937908	1	1
biological_process	GO:0030518	intracellular steroid hormone receptor signaling pathway	0	1	0	0.81213	1	1	1
biological_process	GO:0050992	dimethylallyl diphosphate biosynthetic process	0	1	0	0.81213	1	1	1
biological_process	GO:0009240	isopentenyl diphosphate biosynthetic process	0	1	0	0.685165	0.713321	1	1
biological_process	GO:0044652	adhesion of symbiont to host endothelial cell	0	1	0	0.81213	1	1	1
biological_process	GO:0045901	positive regulation of translational elongation	0	1	0	0.81213	1	1	1
biological_process	GO:0045905	positive regulation of translational termination	0	1	0	0.81213	1	1	1
biological_process	GO:0046210	nitric oxide catabolic process	0	5	0	0.353093	1	1	1
biological_process	GO:0052163	symbiont defense to host-produced nitric oxide	0	2	0	0.659519	1	1	1
biological_process	GO:0010621	negative regulation of transcription by transcription factor localization	0	1	0	0.81213	1	1	1
biological_process	GO:1900743	positive regulation of filamentous growth of a population of unicellular organisms in response to pH	0	2	0	0.86597	0.306612	1	1
biological_process	GO:0090053	positive regulation of pericentric heterochromatin assembly	0	1	0	0.81213	1	1	1
biological_process	GO:0006043	glucosamine catabolic process	0	1	0	0.81213	1	1	1
biological_process	GO:0006046	N-acetylglucosamine catabolic process	0	2	0	0.659519	1	1	1
biological_process	GO:0019262	N-acetylneuraminate catabolic process	0	1	0	0.81213	1	1	1
biological_process	GO:0046655	folic acid metabolic process	0	3	0	0.286679	1	1	1
biological_process	GO:0019264	glycine biosynthetic process from serine	0	2	0	0.659519	1	1	1
biological_process	GO:0006565	L-serine catabolic process	0	2	0	0.659519	1	1	1
biological_process	GO:0046653	tetrahydrofolate metabolic process	0	2	0	0.358964	0.898942	1	1
biological_process	GO:0052746	inositol phosphorylation	0	1	0	0.81213	1	1	1
biological_process	GO:0018160	peptidyl-pyrromethane cofactor linkage	0	1	0	0.81213	1	1	1
biological_process	GO:0001766	membrane raft polarization	0	2	0	0.659519	1	1	1
biological_process	GO:2000480	negative regulation of cAMP-dependent protein kinase activity	0	1	0	0.81213	1	1	1
biological_process	GO:0046580	negative regulation of Ras protein signal transduction	0	1	0	0.95434	0.176838	1	1
biological_process	GO:0045762	positive regulation of adenylate cyclase activity	0	1	0	0.81213	1	1	1
biological_process	GO:0061406	positive regulation of transcription from RNA polymerase II promoter in response to glucose starvation	0	1	0	0.81213	1	1	1
biological_process	GO:0036278	positive regulation of transcription from RNA polymerase II promoter in response to nitrogen starvation	0	1	0	0.81213	1	1	1
biological_process	GO:0010603	regulation of cytoplasmic mRNA processing body assembly	0	1	0	0.964741	0.340481	1	1
biological_process	GO:0000742	karyogamy involved in conjugation with cellular fusion	0	7	0	0.232744	1	1	1
biological_process	GO:0048288	nuclear membrane fusion involved in karyogamy	0	2	0	0.659519	1	1	1
biological_process	GO:0000448	cleavage in ITS2 between 5.8S rRNA and LSU-rRNA of tricistronic rRNA transcript (SSU-rRNA, 5.8S rRNA, LSU-rRNA)	0	1	0	0.81213	1	1	1
biological_process	GO:0000737	DNA catabolic process, endonucleolytic	0	1	0	0.659519	1	1	1
biological_process	GO:0051097	negative regulation of helicase activity	0	3	0	0.353093	1	1	1
biological_process	GO:1901195	positive regulation of formation of translation preinitiation complex	0	1	0	0.81213	1	1	1
biological_process	GO:0006596	polyamine biosynthetic process	0	3	0	0.286679	1	1	1
biological_process	GO:0033387	putrescine biosynthetic process from ornithine	0	1	0	0.81213	1	1	1
biological_process	GO:0006190	inosine salvage	0	1	0	0.81213	1	1	1
biological_process	GO:0071590	nicotinamide riboside biosynthetic process	0	1	0	0.81213	1	1	1
biological_process	GO:0071592	nicotinic acid riboside biosynthetic process	0	1	0	0.81213	1	1	1
biological_process	GO:0035853	chromosome passenger complex localization to spindle midzone	0	1	0	0.81213	1	1	1
biological_process	GO:1902406	mitotic actomyosin contractile ring maintenance	0	2	0	0.659519	1	1	1
biological_process	GO:0032467	positive regulation of cytokinesis	0	1	0	0.232744	1	1	1
biological_process	GO:0031536	positive regulation of exit from mitosis	0	1	0	0.81213	1	1	1
biological_process	GO:1903490	positive regulation of mitotic cytokinesis	0	2	0	0.232744	1	1	1
biological_process	GO:0140429	positive regulation of mitotic sister chromatid biorientation	0	2	0	0.659519	1	1	1
biological_process	GO:0031031	positive regulation of septation initiation signaling	0	3	0	0.535556	1	1	1
biological_process	GO:1902440	protein localization to mitotic spindle pole body	0	1	0	0.535556	1	1	1
biological_process	GO:1904789	regulation of mitotic actomyosin contractile ring maintenance	0	1	0	0.81213	1	1	1
biological_process	GO:0000161	osmosensory signaling MAPK cascade	0	2	0	0.659519	1	1	1
biological_process	GO:0008612	peptidyl-lysine modification to peptidyl-hypusine	0	2	0	0.659519	1	1	1
biological_process	GO:0044154	histone H3-K14 acetylation	0	3	0	0.761976	0.646907	1	1
biological_process	GO:0043983	histone H4-K12 acetylation	0	1	0	0.81213	1	1	1
biological_process	GO:0043981	histone H4-K5 acetylation	0	1	0	0.81213	1	1	1
biological_process	GO:0043982	histone H4-K8 acetylation	0	1	0	0.81213	1	1	1
biological_process	GO:0006505	GPI anchor metabolic process	0	1	0	0.229758	0.892169	1	1
biological_process	GO:0015819	lysine transport	0	1	0	0.81213	1	1	1
biological_process	GO:0019427	acetyl-CoA biosynthetic process from acetate	0	2	0	0.659519	1	1	1
biological_process	GO:0015802	basic amino acid transport	0	2	0	0.286679	1	1	1
biological_process	GO:0006168	adenine salvage	0	1	0	0.81213	1	1	1
biological_process	GO:0044209	AMP salvage	0	2	0	0.659519	1	1	1
biological_process	GO:0045005	DNA-dependent DNA replication maintenance of fidelity	0	2	0	0.994466	0.0183141	1	1
biological_process	GO:0034085	establishment of sister chromatid cohesion	0	1	0	0.761976	0.646907	1	1
biological_process	GO:1902596	negative regulation of DNA replication origin binding	0	1	0	0.81213	1	1	1
biological_process	GO:2001033	negative regulation of double-strand break repair via nonhomologous end joining	0	1	0	0.81213	1	1	1
biological_process	GO:0051447	negative regulation of meiotic cell cycle	0	1	0	0.915597	0.314835	1	1
biological_process	GO:1903500	negative regulation of mitotic actomyosin contractile ring assembly	0	1	0	0.81213	1	1	1
biological_process	GO:0045930	negative regulation of mitotic cell cycle	0	1	0	0.954765	0.0881907	1	1
biological_process	GO:0045875	negative regulation of sister chromatid cohesion	0	1	0	0.659519	1	1	1
biological_process	GO:1905168	positive regulation of double-strand break repair via homologous recombination	0	1	0	0.81213	1	1	1
biological_process	GO:0045819	positive regulation of glycogen catabolic process	0	1	0	0.81213	1	1	1
biological_process	GO:0051446	positive regulation of meiotic cell cycle	0	1	0	0.915597	0.314835	1	1
biological_process	GO:0045931	positive regulation of mitotic cell cycle	0	1	0	0.68224	0.534428	1	1
biological_process	GO:1904291	positive regulation of mitotic DNA damage checkpoint	0	1	0	0.81213	1	1	1
biological_process	GO:0010696	positive regulation of mitotic spindle pole body separation	0	2	0	0.659519	1	1	1
biological_process	GO:0010571	positive regulation of nuclear cell cycle DNA replication	0	2	0	0.659519	1	1	1
biological_process	GO:1901319	positive regulation of trehalose catabolic process	0	1	0	0.81213	1	1	1
biological_process	GO:0010898	positive regulation of triglyceride catabolic process	0	1	0	0.81213	1	1	1
biological_process	GO:1990139	protein localization to nuclear periphery	0	1	0	0.81213	1	1	1
biological_process	GO:1902889	protein localization to spindle microtubule	0	1	0	0.81213	1	1	1
biological_process	GO:0010568	regulation of budding cell apical bud growth	0	1	0	0.81213	1	1	1
biological_process	GO:1902275	regulation of chromatin organization	0	2	0	0.164973	0.947706	1	1
biological_process	GO:0010389	regulation of G2/M transition of mitotic cell cycle	0	1	0	0.761247	0.446167	1	1
biological_process	GO:0060303	regulation of nucleosome density	0	2	0	0.659519	1	1	1
biological_process	GO:1905634	regulation of protein localization to chromatin	0	1	0	0.81213	1	1	1
biological_process	GO:0090169	regulation of spindle assembly	0	1	0	0.964741	0.340481	1	1
biological_process	GO:0032210	regulation of telomere maintenance via telomerase	0	1	0	0.837616	0.565131	1	1
biological_process	GO:0006592	ornithine biosynthetic process	0	2	0	0.659519	1	1	1
biological_process	GO:2000001	regulation of DNA damage checkpoint	0	1	0	0.535556	1	1	1
biological_process	GO:0097428	protein maturation by iron-sulfur cluster transfer	0	7	0	0.229653	0.945976	1	1
biological_process	GO:0000354	cis assembly of pre-catalytic spliceosome	0	1	0	0.81213	1	1	1
biological_process	GO:0006031	chitin biosynthetic process	0	1	0	0.823162	0.460669	1	1
biological_process	GO:0006042	glucosamine biosynthetic process	0	1	0	0.81213	1	1	1
biological_process	GO:0006047	UDP-N-acetylglucosamine metabolic process	0	1	0	0.761976	0.646907	1	1
biological_process	GO:0071816	tail-anchored membrane protein insertion into ER membrane	0	1	0	0.81213	1	1	1
biological_process	GO:0045048	protein insertion into ER membrane	0	5	0	0.232744	1	1	1
biological_process	GO:0006620	posttranslational protein targeting to endoplasmic reticulum membrane	0	6	0	0.196589	0.956159	1	1
biological_process	GO:0015886	heme transport	0	3	0	0.434869	1	1	1
biological_process	GO:0010821	regulation of mitochondrion organization	0	1	0	0.837616	0.565131	1	1
biological_process	GO:0006044	N-acetylglucosamine metabolic process	0	1	0	0.434869	1	1	1
biological_process	GO:0006673	inositol phosphoceramide metabolic process	0	5	0	0.286679	1	1	1
biological_process	GO:0071897	DNA biosynthetic process	0	2	0	0.252122	0.891649	1	1
biological_process	GO:0051103	DNA ligation involved in DNA repair	0	1	0	0.81213	1	1	1
biological_process	GO:0006297	nucleotide-excision repair, DNA gap filling	0	4	0	0.434869	1	1	1
biological_process	GO:0051443	positive regulation of ubiquitin-protein transferase activity	0	1	0	0.81213	1	1	1
biological_process	GO:0045116	protein neddylation	0	5	0	0.353093	1	1	1
biological_process	GO:0034462	small-subunit processome assembly	0	1	0	0.81213	1	1	1
biological_process	GO:0051645	Golgi localization	0	2	0	0.659519	1	1	1
biological_process	GO:0006083	acetate metabolic process	0	1	0	0.837616	0.565131	1	1
biological_process	GO:0019679	propionate metabolic process, methylcitrate cycle	0	1	0	0.81213	1	1	1
biological_process	GO:0006409	tRNA export from nucleus	0	5	0	0.188945	1	1	1
biological_process	GO:0048024	regulation of mRNA splicing, via spliceosome	0	1	0	0.535556	1	1	1
biological_process	GO:0030950	establishment or maintenance of actin cytoskeleton polarity	0	4	0	0.434869	1	1	1
biological_process	GO:0070125	mitochondrial translational elongation	0	3	0	0.535556	1	1	1
biological_process	GO:0034067	protein localization to Golgi apparatus	0	4	0	0.864947	0.34232	1	1
biological_process	GO:0035103	sterol regulatory element binding protein cleavage	0	2	0	0.659519	1	1	1
biological_process	GO:0032466	negative regulation of cytokinesis	0	1	0	0.769872	0.526538	1	1
biological_process	GO:1903920	positive regulation of actin filament severing	0	1	0	0.81213	1	1	1
biological_process	GO:0035405	histone-threonine phosphorylation	0	1	0	0.81213	1	1	1
biological_process	GO:0010525	regulation of transposition, RNA-mediated	0	2	0	0.535556	1	1	1
biological_process	GO:0046188	methane catabolic process	0	1	0	0.81213	1	1	1
biological_process	GO:0015945	methanol metabolic process	0	1	0	0.81213	1	1	1
biological_process	GO:0010994	free ubiquitin chain polymerization	0	2	0	0.659519	1	1	1
biological_process	GO:0044395	protein targeting to vacuolar membrane	0	2	0	0.659519	1	1	1
biological_process	GO:1902906	proteasome storage granule assembly	0	1	0	0.81213	1	1	1
biological_process	GO:0033518	myo-inositol hexakisphosphate dephosphorylation	0	1	0	0.81213	1	1	1
biological_process	GO:0002940	tRNA N2-guanine methylation	0	1	0	0.81213	1	1	1
biological_process	GO:1990145	maintenance of translational fidelity	0	2	0	0.659519	1	1	1
biological_process	GO:0006753	nucleoside phosphate metabolic process	0	1	0	0.166746	0.88234	1	1
biological_process	GO:0019693	ribose phosphate metabolic process	0	1	0	0.0203281	0.989892	0.991	1
biological_process	GO:0000465	exonucleolytic trimming to generate mature 5'-end of 5.8S rRNA from tricistronic rRNA transcript (SSU-rRNA, 5.8S rRNA, LSU-rRNA)	0	2	0	0.659519	1	1	1
biological_process	GO:0006561	proline biosynthetic process	0	1	0	0.434869	1	1	1
biological_process	GO:0006562	proline catabolic process	0	1	0	0.977272	0.162384	1	1
biological_process	GO:1904825	protein localization to microtubule plus-end	0	1	0	0.81213	1	1	1
biological_process	GO:0031110	regulation of microtubule polymerization or depolymerization	0	1	0	0.907444	0.464444	1	1
biological_process	GO:0110136	protein-RNA complex remodeling	0	1	0	0.81213	1	1	1
biological_process	GO:0019354	siroheme biosynthetic process	0	2	0	0.659519	1	1	1
biological_process	GO:0015810	aspartate transmembrane transport	0	1	0	0.81213	1	1	1
biological_process	GO:0015813	L-glutamate transmembrane transport	0	1	0	0.81213	1	1	1
biological_process	GO:0043490	malate-aspartate shuttle	0	1	0	0.81213	1	1	1
biological_process	GO:0034314	Arp2/3 complex-mediated actin nucleation	0	7	0	0.73941	0.50567	1	1
biological_process	GO:0052032	modulation by symbiont of host inflammatory response	0	1	0	0.81213	1	1	1
biological_process	GO:0042776	mitochondrial ATP synthesis coupled proton transport	0	3	0	0.535556	1	1	1
biological_process	GO:0006287	base-excision repair, gap-filling	0	2	0	0.659519	1	1	1
biological_process	GO:0045004	DNA replication proofreading	0	2	0	0.659519	1	1	1
biological_process	GO:1904161	DNA synthesis involved in UV-damage excision repair	0	2	0	0.659519	1	1	1
biological_process	GO:1903459	mitotic DNA replication lagging strand elongation	0	2	0	0.659519	1	1	1
biological_process	GO:0110032	positive regulation of G2/MI transition of meiotic cell cycle	0	1	0	0.81213	1	1	1
biological_process	GO:0006015	5-phosphoribose 1-diphosphate biosynthetic process	0	4	0	0.434869	1	1	1
biological_process	GO:0006164	purine nucleotide biosynthetic process	0	6	0	0.0300011	0.989157	0.999	1
biological_process	GO:0009156	ribonucleoside monophosphate biosynthetic process	0	4	0	0.0809774	0.978263	1	1
biological_process	GO:0046656	folic acid biosynthetic process	0	3	0	0.535556	1	1	1
biological_process	GO:0046654	tetrahydrofolate biosynthetic process	0	4	0	0.434869	1	1	1
biological_process	GO:0019346	transsulfuration	0	6	0	0.286679	1	1	1
biological_process	GO:0061504	cyclic threonylcarbamoyladenosine biosynthetic process	0	1	0	0.81213	1	1	1
biological_process	GO:0005991	trehalose metabolic process	0	1	0	0.473462	0.846619	1	1
biological_process	GO:0006784	heme A biosynthetic process	0	2	0	0.659519	1	1	1
biological_process	GO:0031638	zymogen activation	0	2	0	0.659519	1	1	1
biological_process	GO:0006102	isocitrate metabolic process	0	4	0	0.434869	1	1	1
biological_process	GO:0006739	NADP metabolic process	0	2	0	0.229653	0.945976	1	1
biological_process	GO:0065003	protein-containing complex assembly	0	6	0	0.334107	0.71685	1	1
biological_process	GO:0070262	peptidyl-serine dephosphorylation	0	4	0	0.434869	1	1	1
biological_process	GO:1904184	positive regulation of pyruvate dehydrogenase activity	0	1	0	0.81213	1	1	1
biological_process	GO:0006740	NADPH regeneration	0	1	0	0.153381	1	1	1
biological_process	GO:0015707	nitrite transport	0	1	0	0.81213	1	1	1
biological_process	GO:0019464	glycine decarboxylation via glycine cleavage system	0	3	0	0.535556	1	1	1
biological_process	GO:0009408	response to heat	0	5	0	0.643512	0.488741	1	1
biological_process	GO:0042450	arginine biosynthetic process via ornithine	0	3	0	0.535556	1	1	1
biological_process	GO:0031930	mitochondria-nucleus signaling pathway	0	1	0	0.81213	1	1	1
biological_process	GO:0072657	protein localization to membrane	0	2	0	0.241004	0.836183	1	1
biological_process	GO:0007034	vacuolar transport	0	14	0	0.962326	0.0643584	1	1
biological_process	GO:0008053	mitochondrial fusion	0	2	0	0.434869	1	1	1
biological_process	GO:1990627	mitochondrial inner membrane fusion	0	2	0	0.659519	1	1	1
biological_process	GO:1990626	mitochondrial outer membrane fusion	0	2	0	0.659519	1	1	1
biological_process	GO:0010038	response to metal ion	0	2	0	0.898836	0.176315	1	1
biological_process	GO:0006617	SRP-dependent cotranslational protein targeting to membrane, signal sequence recognition	0	1	0	0.81213	1	1	1
biological_process	GO:0006874	cellular calcium ion homeostasis	0	11	0	0.314808	0.878569	1	1
biological_process	GO:0051592	response to calcium ion	0	1	0	0.81213	1	1	1
biological_process	GO:0045050	protein insertion into ER membrane by stop-transfer membrane-anchor sequence	0	1	0	0.81213	1	1	1
biological_process	GO:0018344	protein geranylgeranylation	0	5	0	0.353093	1	1	1
biological_process	GO:0046417	chorismate metabolic process	0	1	0	0.837616	0.565131	1	1
biological_process	GO:0009094	L-phenylalanine biosynthetic process	0	2	0	0.659519	1	1	1
biological_process	GO:0006571	tyrosine biosynthetic process	0	4	0	0.434869	1	1	1
biological_process	GO:0006530	asparagine catabolic process	0	2	0	0.659519	1	1	1
biological_process	GO:0006086	acetyl-CoA biosynthetic process from pyruvate	0	4	0	0.434869	1	1	1
biological_process	GO:0006469	negative regulation of protein kinase activity	0	2	0	0.434869	1	1	1
biological_process	GO:0019988	charged-tRNA amino acid modification	0	1	0	0.964741	0.340481	1	1
biological_process	GO:0006425	glutaminyl-tRNA aminoacylation	0	1	0	0.81213	1	1	1
biological_process	GO:0070072	vacuolar proton-transporting V-type ATPase complex assembly	0	7	0	0.232744	1	1	1
biological_process	GO:0044262	cellular carbohydrate metabolic process	0	1	0	0.298823	0.78751	1	1
biological_process	GO:0019323	pentose catabolic process	0	1	0	0.353093	1	1	1
biological_process	GO:0001933	negative regulation of protein phosphorylation	0	2	0	0.286679	1	1	1
biological_process	GO:0031333	negative regulation of protein-containing complex assembly	0	2	0	0.310446	0.917978	1	1
biological_process	GO:0000096	sulfur amino acid metabolic process	0	1	0	0.0442437	0.989431	1	1
biological_process	GO:0000256	allantoin catabolic process	0	3	0	0.535556	1	1	1
biological_process	GO:0033121	regulation of purine nucleotide catabolic process	0	1	0	0.81213	1	1	1
biological_process	GO:0070647	protein modification by small protein conjugation or removal	0	1	0	0.789608	0.283233	1	1
biological_process	GO:0042255	ribosome assembly	0	2	0	0.0638931	0.976692	1	1
biological_process	GO:0070084	protein initiator methionine removal	0	1	0	0.659519	1	1	1
biological_process	GO:1902426	deactivation of mitotic spindle assembly checkpoint	0	1	0	0.81213	1	1	1
biological_process	GO:0010697	negative regulation of mitotic spindle pole body separation	0	1	0	0.81213	1	1	1
biological_process	GO:1905786	positive regulation of anaphase-promoting complex-dependent catabolic process	0	3	0	0.535556	1	1	1
biological_process	GO:0120151	positive regulation of mitotic actomyosin contractile ring disassembly	0	1	0	0.81213	1	1	1
biological_process	GO:0042183	formate catabolic process	0	3	0	0.535556	1	1	1
biological_process	GO:0006097	glyoxylate cycle	0	3	0	0.535556	1	1	1
biological_process	GO:1901799	negative regulation of proteasomal protein catabolic process	0	1	0	0.535556	1	1	1
biological_process	GO:0061136	regulation of proteasomal protein catabolic process	0	1	0	0.124504	1	1	1
biological_process	GO:0032434	regulation of proteasomal ubiquitin-dependent protein catabolic process	0	1	0	0.124504	1	1	1
biological_process	GO:0097352	autophagosome maturation	0	1	0	0.81213	1	1	1
biological_process	GO:2001168	positive regulation of histone H2B ubiquitination	0	1	0	0.81213	1	1	1
biological_process	GO:0034517	ribophagy	0	3	0	0.535556	1	1	1
biological_process	GO:1990171	SCF complex disassembly in response to cadmium stress	0	1	0	0.81213	1	1	1
biological_process	GO:1900437	regulation of filamentous growth of a population of unicellular organisms in response to chemical stimulus	0	1	0	0.953614	0.13403	1	1
biological_process	GO:0019303	D-ribose catabolic process	0	1	0	0.81213	1	1	1
biological_process	GO:0006144	purine nucleobase metabolic process	0	3	0	0.314808	0.878569	1	1
biological_process	GO:0006422	aspartyl-tRNA aminoacylation	0	2	0	0.659519	1	1	1
biological_process	GO:0009311	oligosaccharide metabolic process	0	2	0	0.39793	0.832174	1	1
biological_process	GO:0032196	transposition	0	2	0	0.353093	1	1	1
biological_process	GO:0015856	cytosine transport	0	2	0	0.659519	1	1	1
biological_process	GO:0006863	purine nucleobase transport	0	1	0	0.659519	1	1	1
biological_process	GO:0006360	transcription by RNA polymerase I	0	5	0	0.576297	0.589047	1	1
biological_process	GO:0006309	apoptotic DNA fragmentation	0	1	0	0.81213	1	1	1
biological_process	GO:0051607	defense response to virus	0	1	0	0.81213	1	1	1
biological_process	GO:0006145	purine nucleobase catabolic process	0	2	0	0.434869	1	1	1
biological_process	GO:0019408	dolichol biosynthetic process	0	4	0	0.353093	1	1	1
biological_process	GO:0016095	polyprenol catabolic process	0	1	0	0.81213	1	1	1
biological_process	GO:0055129	L-proline biosynthetic process	0	3	0	0.535556	1	1	1
biological_process	GO:0000479	endonucleolytic cleavage of tricistronic rRNA transcript (SSU-rRNA, 5.8S rRNA, LSU-rRNA)	0	3	0	0.767697	0.397455	1	1
biological_process	GO:0006429	leucyl-tRNA aminoacylation	0	2	0	0.659519	1	1	1
biological_process	GO:0061161	positive regulation of establishment of bipolar cell polarity regulating cell shape	0	1	0	0.81213	1	1	1
biological_process	GO:0006285	base-excision repair, AP site formation	0	5	0	0.286679	1	1	1
biological_process	GO:0019216	regulation of lipid metabolic process	0	1	0	0.553833	0.685192	1	1
biological_process	GO:0071786	endoplasmic reticulum tubular network organization	0	5	0	0.286679	1	1	1
biological_process	GO:0006210	thymine catabolic process	0	1	0	0.81213	1	1	1
biological_process	GO:0036261	7-methylguanosine cap hypermethylation	0	6	0	0.286679	1	1	1
biological_process	GO:0009452	7-methylguanosine RNA capping	0	1	0	0.610289	0.767256	1	1
biological_process	GO:0001188	RNA polymerase I preinitiation complex assembly	0	1	0	0.81213	1	1	1
biological_process	GO:0006636	unsaturated fatty acid biosynthetic process	0	4	0	0.353093	1	1	1
biological_process	GO:0009308	amine metabolic process	0	4	0	0.310166	0.842526	1	1
biological_process	GO:0140570	extraction of mislocalized protein from mitochondrial outer membrane	0	1	0	0.81213	1	1	1
biological_process	GO:0036149	phosphatidylinositol acyl-chain remodeling	0	1	0	0.81213	1	1	1
biological_process	GO:0071423	malate transmembrane transport	0	1	0	0.81213	1	1	1
biological_process	GO:0015729	oxaloacetate transport	0	1	0	0.81213	1	1	1
biological_process	GO:0035435	phosphate ion transmembrane transport	0	4	0	0.434869	1	1	1
biological_process	GO:0071422	succinate transmembrane transport	0	1	0	0.81213	1	1	1
biological_process	GO:0008272	sulfate transport	0	1	0	0.81213	1	1	1
biological_process	GO:0015709	thiosulfate transport	0	1	0	0.81213	1	1	1
biological_process	GO:0034220	ion transmembrane transport	0	4	0	3.05175e-05	0.999994	0.001	1
biological_process	GO:0051083	'de novo' cotranslational protein folding	0	3	0	0.535556	1	1	1
biological_process	GO:0071409	cellular response to cycloheximide	0	1	0	0.81213	1	1	1
biological_process	GO:0060548	negative regulation of cell death	0	2	0	0.434869	1	1	1
biological_process	GO:0006450	regulation of translational fidelity	0	5	0	0.539331	0.811055	1	1
biological_process	GO:0006452	translational frameshifting	0	3	0	0.434869	1	1	1
biological_process	GO:0071031	nuclear mRNA surveillance of mRNA 3'-end processing	0	2	0	0.659519	1	1	1
biological_process	GO:0071039	nuclear polyadenylation-dependent CUT catabolic process	0	3	0	0.535556	1	1	1
biological_process	GO:0016075	rRNA catabolic process	0	10	0	0.121431	0.976579	1	1
biological_process	GO:0030847	termination of RNA polymerase II transcription, exosome-dependent	0	3	0	0.535556	1	1	1
biological_process	GO:0032048	cardiolipin metabolic process	0	2	0	0.310446	0.917978	1	1
biological_process	GO:0046337	phosphatidylethanolamine metabolic process	0	1	0	0.473462	0.846619	1	1
biological_process	GO:0098863	nuclear migration by microtubule mediated pushing forces	0	2	0	0.659519	1	1	1
biological_process	GO:0035725	sodium ion transmembrane transport	0	1	0	0.535556	1	1	1
biological_process	GO:0042759	long-chain fatty acid biosynthetic process	0	2	0	0.659519	1	1	1
biological_process	GO:0031990	mRNA export from nucleus in response to heat stress	0	2	0	0.907444	0.464444	1	1
biological_process	GO:0034402	recruitment of 3'-end processing factors to RNA polymerase II holoenzyme complex	0	3	0	0.434869	1	1	1
biological_process	GO:0010230	alternative respiration	0	2	0	0.659519	1	1	1
biological_process	GO:0010513	positive regulation of phosphatidylinositol biosynthetic process	0	1	0	0.81213	1	1	1
biological_process	GO:1903778	protein localization to vacuolar membrane	0	2	0	0.434869	1	1	1
biological_process	GO:0006754	ATP biosynthetic process	0	3	0	0.019002	1	0.991	1
biological_process	GO:0070911	global genome nucleotide-excision repair	0	2	0	0.659519	1	1	1
biological_process	GO:0009411	response to UV	0	2	0	0.895425	0.238753	1	1
biological_process	GO:0009593	detection of chemical stimulus	0	1	0	0.535556	1	1	1
biological_process	GO:0046390	ribose phosphate biosynthetic process	0	2	0	0.00681083	0.99792	0.796	1
biological_process	GO:0060249	anatomical structure homeostasis	0	1	0	0.668258	0.485529	1	1
biological_process	GO:0030041	actin filament polymerization	0	3	0	0.825439	0.324267	1	1
biological_process	GO:0016094	polyprenol biosynthetic process	0	2	0	0.286679	1	1	1
biological_process	GO:0009098	leucine biosynthetic process	0	5	0	0.685165	0.713321	1	1
biological_process	GO:0048254	snoRNA localization	0	2	0	0.659519	1	1	1
biological_process	GO:0006437	tyrosyl-tRNA aminoacylation	0	1	0	0.659519	1	1	1
biological_process	GO:0042938	dipeptide transport	0	6	0	0.232744	1	1	1
biological_process	GO:0042939	tripeptide transport	0	7	0	0.232744	1	1	1
biological_process	GO:0010961	cellular magnesium ion homeostasis	0	2	0	0.659519	1	1	1
biological_process	GO:0043687	post-translational protein modification	0	1	0	0.473462	0.846619	1	1
biological_process	GO:0018279	protein N-linked glycosylation via asparagine	0	6	0	0.286679	1	1	1
biological_process	GO:0006390	mitochondrial transcription	0	2	0	0.535556	1	1	1
biological_process	GO:0006435	threonyl-tRNA aminoacylation	0	2	0	0.659519	1	1	1
biological_process	GO:0034488	basic amino acid transmembrane export from vacuole	0	2	0	0.659519	1	1	1
biological_process	GO:0006654	phosphatidic acid biosynthetic process	0	10	0	0.124504	1	1	1
biological_process	GO:0019433	triglyceride catabolic process	0	4	0	0.353093	1	1	1
biological_process	GO:0010124	phenylacetate catabolic process	0	3	0	0.535556	1	1	1
biological_process	GO:0070682	proteasome regulatory particle assembly	0	8	0	0.188945	1	1	1
biological_process	GO:0015699	antimonite transport	0	1	0	0.81213	1	1	1
biological_process	GO:0015700	arsenite transport	0	1	0	0.81213	1	1	1
biological_process	GO:0006658	phosphatidylserine metabolic process	0	1	0	0.434869	1	1	1
biological_process	GO:1900102	negative regulation of endoplasmic reticulum unfolded protein response	0	1	0	0.81213	1	1	1
biological_process	GO:1904377	positive regulation of protein localization to cell periphery	0	1	0	0.81213	1	1	1
biological_process	GO:0006535	cysteine biosynthetic process from serine	0	6	0	0.286679	1	1	1
biological_process	GO:0006147	guanine catabolic process	0	1	0	0.81213	1	1	1
biological_process	GO:0046098	guanine metabolic process	0	1	0	0.81213	1	1	1
biological_process	GO:0051180	vitamin transport	0	2	0	0.353093	1	1	1
biological_process	GO:0051792	medium-chain fatty acid biosynthetic process	0	2	0	0.659519	1	1	1
biological_process	GO:0051793	medium-chain fatty acid catabolic process	0	2	0	0.659519	1	1	1
biological_process	GO:0007323	peptide pheromone maturation	0	3	0	0.837616	0.565131	1	1
biological_process	GO:0015883	FAD transport	0	3	0	0.535556	1	1	1
biological_process	GO:0043069	negative regulation of programmed cell death	0	1	0	0.659519	1	1	1
biological_process	GO:1902884	positive regulation of response to oxidative stress	0	1	0	0.659519	1	1	1
biological_process	GO:0018216	peptidyl-arginine methylation	0	2	0	0.535556	1	1	1
biological_process	GO:0043504	mitochondrial DNA repair	0	1	0	0.81213	1	1	1
biological_process	GO:0006081	cellular aldehyde metabolic process	0	2	0	0.229653	0.945976	1	1
biological_process	GO:0044210	'de novo' CTP biosynthetic process	0	1	0	0.81213	1	1	1
biological_process	GO:0006241	CTP biosynthetic process	0	2	0	0.907444	0.464444	1	1
biological_process	GO:0019856	pyrimidine nucleobase biosynthetic process	0	2	0	0.124504	1	1	1
biological_process	GO:0071218	cellular response to misfolded protein	0	2	0	0.267464	0.933431	1	1
biological_process	GO:0000461	endonucleolytic cleavage to generate mature 3'-end of SSU-rRNA from (SSU-rRNA, 5.8S rRNA, LSU-rRNA)	0	2	0	0.659519	1	1	1
biological_process	GO:0071248	cellular response to metal ion	0	2	0	0.973333	0.0582275	1	1
biological_process	GO:0051454	intracellular pH elevation	0	1	0	0.81213	1	1	1
biological_process	GO:0006839	mitochondrial transport	0	2	0	0.0264687	0.988574	0.999	1
biological_process	GO:0006432	phenylalanyl-tRNA aminoacylation	0	3	0	0.535556	1	1	1
biological_process	GO:0033389	putrescine biosynthetic process from arginine, using agmatinase	0	2	0	0.659519	1	1	1
biological_process	GO:0006427	histidyl-tRNA aminoacylation	0	1	0	0.81213	1	1	1
biological_process	GO:1902476	chloride transmembrane transport	0	2	0	0.659519	1	1	1
biological_process	GO:0015793	glycerol transport	0	1	0	0.81213	1	1	1
biological_process	GO:0008610	lipid biosynthetic process	0	1	0	0.00831046	0.99549	0.856	1
biological_process	GO:0009450	gamma-aminobutyric acid catabolic process	0	4	0	0.353093	1	1	1
biological_process	GO:0010045	response to nickel cation	0	1	0	0.81213	1	1	1
biological_process	GO:0006520	cellular amino acid metabolic process	0	3	0	0.03451	0.978153	0.999	1
biological_process	GO:0042823	pyridoxal phosphate biosynthetic process	0	2	0	0.434869	1	1	1
biological_process	GO:0044273	sulfur compound catabolic process	0	3	0	0.546847	0.732536	1	1
biological_process	GO:0005980	glycogen catabolic process	0	2	0	0.535556	1	1	1
biological_process	GO:0009082	branched-chain amino acid biosynthetic process	0	3	0	0.769872	0.526538	1	1
biological_process	GO:0035196	production of miRNAs involved in gene silencing by miRNA	0	1	0	0.964741	0.340481	1	1
biological_process	GO:0030422	production of siRNA involved in RNA interference	0	1	0	0.81213	1	1	1
biological_process	GO:0018283	iron incorporation into metallo-sulfur cluster	0	1	0	0.81213	1	1	1
biological_process	GO:0006121	mitochondrial electron transport, succinate to ubiquinone	0	7	0	0.232744	1	1	1
biological_process	GO:0010040	response to iron(II) ion	0	1	0	0.81213	1	1	1
biological_process	GO:0019544	arginine catabolic process to glutamate	0	1	0	0.81213	1	1	1
biological_process	GO:0010121	arginine catabolic process to proline via ornithine	0	1	0	0.81213	1	1	1
biological_process	GO:0006591	ornithine metabolic process	0	1	0	0.232744	1	1	1
biological_process	GO:0015786	UDP-glucose transmembrane transport	0	1	0	0.81213	1	1	1
biological_process	GO:0009166	nucleotide catabolic process	0	2	0	0.714207	0.586724	1	1
biological_process	GO:0006206	pyrimidine nucleobase metabolic process	0	1	0	0.0665687	1	1	1
biological_process	GO:0015719	allantoate transport	0	4	0	0.434869	1	1	1
biological_process	GO:0006399	tRNA metabolic process	0	2	0	0.00364418	0.998372	0.588	1
biological_process	GO:0016311	dephosphorylation	0	4	0	0.518707	0.612505	1	1
biological_process	GO:0062026	negative regulation of SCF-dependent proteasomal ubiquitin-dependent catabolic process	0	1	0	0.81213	1	1	1
biological_process	GO:0070372	regulation of ERK1 and ERK2 cascade	0	1	0	0.81213	1	1	1
biological_process	GO:0006880	intracellular sequestering of iron ion	0	3	0	0.535556	1	1	1
biological_process	GO:0106034	protein maturation by [2Fe-2S] cluster transfer	0	2	0	0.659519	1	1	1
biological_process	GO:0015741	fumarate transport	0	1	0	0.81213	1	1	1
biological_process	GO:0015744	succinate transport	0	1	0	0.659519	1	1	1
biological_process	GO:0033499	galactose catabolic process via UDP-galactose	0	2	0	0.659519	1	1	1
biological_process	GO:0042125	protein galactosylation	0	2	0	0.659519	1	1	1
biological_process	GO:0052574	UDP-galactose biosynthetic process	0	2	0	0.659519	1	1	1
biological_process	GO:0018063	cytochrome c-heme linkage	0	3	0	0.535556	1	1	1
biological_process	GO:0046907	intracellular transport	0	3	0	0.97191	0.0370248	1	1
biological_process	GO:0040020	regulation of meiotic nuclear division	0	1	0	0.996529	0.0267443	1	1
biological_process	GO:0009887	animal organ morphogenesis	0	1	0	0.81213	1	1	1
biological_process	GO:0009948	anterior/posterior axis specification	0	1	0	0.81213	1	1	1
biological_process	GO:0051259	protein complex oligomerization	0	1	0	0.610289	0.767256	1	1
biological_process	GO:1903577	cellular response to L-arginine	0	1	0	0.81213	1	1	1
biological_process	GO:0061454	release of sequestered calcium ion into cytosol by Golgi	0	1	0	0.81213	1	1	1
biological_process	GO:0043007	maintenance of rDNA	0	2	0	0.659519	1	1	1
biological_process	GO:0006537	glutamate biosynthetic process	0	2	0	0.659519	1	1	1
biological_process	GO:0001677	formation of translation initiation ternary complex	0	1	0	0.81213	1	1	1
biological_process	GO:1900264	positive regulation of DNA-directed DNA polymerase activity	0	1	0	0.81213	1	1	1
biological_process	GO:0019985	translesion synthesis	0	1	0	0.685165	0.713321	1	1
biological_process	GO:1902281	negative regulation of RNA helicase activity	0	1	0	0.81213	1	1	1
biological_process	GO:0043462	regulation of ATP-dependent activity	0	1	0	0.124504	1	1	1
biological_process	GO:0006564	L-serine biosynthetic process	0	2	0	0.659519	1	1	1
biological_process	GO:0060049	regulation of protein glycosylation	0	1	0	0.81213	1	1	1
biological_process	GO:1904380	endoplasmic reticulum mannose trimming	0	2	0	0.659519	1	1	1
biological_process	GO:0070880	fungal-type cell wall beta-glucan biosynthetic process	0	2	0	0.872354	0.389711	1	1
biological_process	GO:0032469	endoplasmic reticulum calcium ion homeostasis	0	1	0	0.81213	1	1	1
biological_process	GO:0036503	ERAD pathway	0	1	0	0.00421422	0.999563	0.63	1
biological_process	GO:1901135	carbohydrate derivative metabolic process	0	1	0	8.71356e-05	0.999956	0.009	1
biological_process	GO:0071554	cell wall organization or biogenesis	0	1	0	0.762852	0.293256	1	1
biological_process	GO:0038203	TORC2 signaling	0	4	0	0.761976	0.646907	1	1
biological_process	GO:0046967	cytosol to endoplasmic reticulum transport	0	1	0	0.659519	1	1	1
biological_process	GO:0046839	phospholipid dephosphorylation	0	1	0	0.769872	0.526538	1	1
biological_process	GO:0006735	NADH regeneration	0	1	0	0.837616	0.565131	1	1
biological_process	GO:0051999	mannosyl-inositol phosphorylceramide biosynthetic process	0	1	0	0.81213	1	1	1
biological_process	GO:0051086	chaperone mediated protein folding independent of cofactor	0	6	0	0.286679	1	1	1
biological_process	GO:0006694	steroid biosynthetic process	0	1	0	0.0946368	0.967607	1	1
biological_process	GO:0035719	tRNA import into nucleus	0	2	0	0.659519	1	1	1
biological_process	GO:0045002	double-strand break repair via single-strand annealing	0	2	0	0.434869	1	1	1
biological_process	GO:0010828	positive regulation of glucose transmembrane transport	0	3	0	0.535556	1	1	1
biological_process	GO:0006521	regulation of cellular amino acid metabolic process	0	1	0	0.951076	0.238024	1	1
biological_process	GO:0019660	glycolytic fermentation	0	2	0	0.659519	1	1	1
biological_process	GO:1990575	mitochondrial L-ornithine transmembrane transport	0	3	0	0.535556	1	1	1
biological_process	GO:0045721	negative regulation of gluconeogenesis	0	2	0	0.659519	1	1	1
biological_process	GO:0045862	positive regulation of proteolysis	0	1	0	0.153381	1	1	1
biological_process	GO:0080182	histone H3-K4 trimethylation	0	2	0	0.659519	1	1	1
biological_process	GO:0034729	histone H3-K79 methylation	0	1	0	0.659519	1	1	1
biological_process	GO:0009435	NAD biosynthetic process	0	4	0	0.73941	0.50567	1	1
biological_process	GO:0034213	quinolinate catabolic process	0	1	0	0.81213	1	1	1
biological_process	GO:0017121	plasma membrane phospholipid scrambling	0	1	0	0.81213	1	1	1
biological_process	GO:0043048	dolichyl monophosphate biosynthetic process	0	1	0	0.81213	1	1	1
biological_process	GO:0030091	protein repair	0	1	0	0.81213	1	1	1
biological_process	GO:1900188	negative regulation of cell adhesion involved in single-species biofilm formation	0	1	0	0.81213	1	1	1
biological_process	GO:0031137	regulation of conjugation with cellular fusion	0	2	0	0.980114	0.0519373	1	1
biological_process	GO:0016237	lysosomal microautophagy	0	3	0	0.761247	0.446167	1	1
biological_process	GO:0006799	polyphosphate biosynthetic process	0	1	0	0.81213	1	1	1
biological_process	GO:0043085	positive regulation of catalytic activity	0	2	0	0.545228	0.61842	1	1
biological_process	GO:0009067	aspartate family amino acid biosynthetic process	0	1	0	0.185654	0.917107	1	1
biological_process	GO:0010960	magnesium ion homeostasis	0	1	0	0.535556	1	1	1
biological_process	GO:0043937	regulation of sporulation	0	1	0	0.353093	1	1	1
biological_process	GO:0015916	fatty-acyl-CoA transport	0	2	0	0.659519	1	1	1
biological_process	GO:0042758	long-chain fatty acid catabolic process	0	2	0	0.659519	1	1	1
biological_process	GO:0015910	long-chain fatty acid import into peroxisome	0	2	0	0.659519	1	1	1
biological_process	GO:0042760	very long-chain fatty acid catabolic process	0	2	0	0.659519	1	1	1
biological_process	GO:0046916	cellular transition metal ion homeostasis	0	2	0	0.300473	0.794043	1	1
biological_process	GO:1990426	mitotic recombination-dependent replication fork processing	0	4	0	0.434869	1	1	1
biological_process	GO:0120290	stalled replication fork localization to nuclear periphery	0	3	0	0.535556	1	1	1
biological_process	GO:0001080	nitrogen catabolite activation of transcription from RNA polymerase II promoter	0	2	0	0.659519	1	1	1
biological_process	GO:0045329	carnitine biosynthetic process	0	4	0	0.434869	1	1	1
biological_process	GO:0000481	maturation of 5S rRNA	0	1	0	0.81213	1	1	1
biological_process	GO:0097010	eukaryotic translation initiation factor 4F complex assembly	0	2	0	0.659519	1	1	1
biological_process	GO:0006559	L-phenylalanine catabolic process	0	1	0	0.81213	1	1	1
biological_process	GO:0006572	tyrosine catabolic process	0	1	0	0.81213	1	1	1
biological_process	GO:0017055	negative regulation of RNA polymerase II transcription preinitiation complex assembly	0	2	0	0.659519	1	1	1
biological_process	GO:0061408	positive regulation of transcription from RNA polymerase II promoter in response to heat stress	0	4	0	0.434869	1	1	1
biological_process	GO:2001038	regulation of cellular response to drug	0	1	0	0.659519	1	1	1
biological_process	GO:1901006	ubiquinone-6 biosynthetic process	0	2	0	0.659519	1	1	1
biological_process	GO:0015847	putrescine transport	0	1	0	0.81213	1	1	1
biological_process	GO:0015840	urea transport	0	2	0	0.659519	1	1	1
biological_process	GO:0019547	arginine catabolic process to ornithine	0	1	0	0.81213	1	1	1
biological_process	GO:0000050	urea cycle	0	2	0	0.659519	1	1	1
biological_process	GO:0033539	fatty acid beta-oxidation using acyl-CoA dehydrogenase	0	1	0	0.81213	1	1	1
biological_process	GO:0090522	vesicle tethering involved in exocytosis	0	2	0	0.659519	1	1	1
biological_process	GO:0071577	zinc ion transmembrane transport	0	4	0	0.434869	1	1	1
biological_process	GO:0070784	regulation of growth of unicellular organism as a thread of attached cells	0	3	0	0.98937	0.0267893	1	1
biological_process	GO:0022618	ribonucleoprotein complex assembly	0	1	0	0.308843	0.776969	1	1
biological_process	GO:0010526	negative regulation of transposition, RNA-mediated	0	1	0	0.81213	1	1	1
biological_process	GO:0046827	positive regulation of protein export from nucleus	0	4	0	0.434869	1	1	1
biological_process	GO:0009398	FMN biosynthetic process	0	1	0	0.81213	1	1	1
biological_process	GO:0006771	riboflavin metabolic process	0	1	0	0.685165	0.713321	1	1
biological_process	GO:0006812	cation transport	0	2	0	3.32349e-05	0.999992	0.002	1
biological_process	GO:1905267	endonucleolytic cleavage involved in tRNA processing	0	1	0	0.964741	0.340481	1	1
biological_process	GO:0072670	mitochondrial tRNA threonylcarbamoyladenosine modification	0	1	0	0.81213	1	1	1
biological_process	GO:0006882	cellular zinc ion homeostasis	0	6	0	0.188945	1	1	1
biological_process	GO:0071805	potassium ion transmembrane transport	0	2	0	0.685165	0.713321	1	1
biological_process	GO:0010906	regulation of glucose metabolic process	0	1	0	0.823162	0.460669	1	1
biological_process	GO:0015764	N-acetylglucosamine transport	0	1	0	0.81213	1	1	1
biological_process	GO:1903457	lactate catabolic process	0	3	0	0.535556	1	1	1
biological_process	GO:0140455	cytoplasm protein quality control	0	1	0	0.232744	1	1	1
biological_process	GO:0140454	protein aggregate center assembly	0	1	0	0.81213	1	1	1
biological_process	GO:0007038	endocytosed protein transport to vacuole	0	1	0	0.81213	1	1	1
biological_process	GO:0045736	negative regulation of cyclin-dependent protein serine/threonine kinase activity	0	1	0	0.81213	1	1	1
biological_process	GO:0000379	tRNA-type intron splice site recognition and cleavage	0	4	0	0.434869	1	1	1
biological_process	GO:0018401	peptidyl-proline hydroxylation to 4-hydroxy-L-proline	0	1	0	0.81213	1	1	1
biological_process	GO:0035965	cardiolipin acyl-chain remodeling	0	5	0	0.353093	1	1	1
biological_process	GO:0042775	mitochondrial ATP synthesis coupled electron transport	0	1	0	0.00113295	0.9999	0.203	1
biological_process	GO:0006098	pentose-phosphate shunt	0	1	0	0.188945	1	1	1
biological_process	GO:0016926	protein desumoylation	0	3	0	0.434869	1	1	1
biological_process	GO:0071383	cellular response to steroid hormone stimulus	0	1	0	0.659519	1	1	1
biological_process	GO:0005987	sucrose catabolic process	0	2	0	0.659519	1	1	1
biological_process	GO:0042761	very long-chain fatty acid biosynthetic process	0	7	0	0.232744	1	1	1
biological_process	GO:0000038	very long-chain fatty acid metabolic process	0	2	0	0.124504	1	1	1
biological_process	GO:0030203	glycosaminoglycan metabolic process	0	1	0	0.659519	1	1	1
biological_process	GO:0044572	[4Fe-4S] cluster assembly	0	1	0	0.81213	1	1	1
biological_process	GO:0006062	sorbitol catabolic process	0	1	0	0.81213	1	1	1
biological_process	GO:0070817	P-TEFb-cap methyltransferase complex localization	0	1	0	0.81213	1	1	1
biological_process	GO:1901921	phosphorylation of RNA polymerase II C-terminal domain involved in recruitment of 3'-end processing factors to RNA polymerase II holoenzyme complex	0	1	0	0.81213	1	1	1
biological_process	GO:1903654	phosphorylation of RNA polymerase II C-terminal domain serine 5 residues involved in positive regulation of transcription elongation from RNA polymerase II promoter	0	1	0	0.81213	1	1	1
biological_process	GO:1900018	phosphorylation of RNA polymerase II C-terminal domain serine 5 residues involved in recruitment of mRNA capping enzyme to RNA polymerase II holoenzyme complex	0	1	0	0.81213	1	1	1
biological_process	GO:1905866	positive regulation of Atg1/ULK1 kinase complex assembly	0	1	0	0.81213	1	1	1
biological_process	GO:0001208	obsolete histone H2A-H2B dimer displacement	0	1	0	0.81213	1	1	1
biological_process	GO:0061635	regulation of protein complex stability	0	1	0	0.81213	1	1	1
biological_process	GO:0010767	regulation of transcription from RNA polymerase II promoter in response to UV-induced DNA damage	0	1	0	0.964741	0.340481	1	1
biological_process	GO:0033540	fatty acid beta-oxidation using acyl-CoA oxidase	0	3	0	0.535556	1	1	1
biological_process	GO:0018023	peptidyl-lysine trimethylation	0	2	0	0.434869	1	1	1
biological_process	GO:0006661	phosphatidylinositol biosynthetic process	0	2	0	0.720734	0.41901	1	1
biological_process	GO:0034398	telomere tethering at nuclear periphery	0	1	0	0.81213	1	1	1
biological_process	GO:0048543	phytochrome chromophore biosynthetic process	0	1	0	0.81213	1	1	1
[truncated: 3,244 more rows]
[truncated: 193 more columns]

## Sheet: polyQ
GO domain	GO ID	GO term	polyQ protein	total number	number / total	raw p-value under-representation	raw p-value over-representation	FWER under-representation	FWER over-representation	Gene Name
biological_process	GO:0030447	filamentous growth	109	387	0.281654	1	4.36477e-09	1	0	SEC2_CANAL	PACC_CANAL	SCH9_CANAL	SEF1_CANAL	SSN2_CANAL	CZF1_CANAL	IRS4_CANAL	CG21_CANAL	MCM1_CANAL	ERK1_CANAL	GDA1_CANAL	PMT1_CANAL	PALA_CANAL	CPH1_CANAL	CRZ1_CANAL	MOB2_CANAL	RFX2_CANAL	SPT6_CANAL	STP2_CANAL	SFL2_CANAL	SSK1_CANAL	PIR32_CANAL	WOR2_CANAL	VAC8_CANAL	TUP1_CANAL	TEC1_CANAL	RBF1_CANAL	CAS5_CANAL	GZF3_CANAL	GIN4_CANAL	ASH1_CANAL	CLA4_CANAL	ADF1_CANAL	CG13_CANAL	CBK1_CANAL	A0A1D8PH81_CANAL	A0A1D8PLL5_CANAL	A0A1D8PRF5_CANAL	Q5AKW2_CANAL	A0A1D8PKT0_CANAL
biological_process	GO:0006357	regulation of transcription by RNA polymerase II	69	144	0.479167	1	3.62716e-33	1	0	PACC_CANAL	TRY5_CANAL	SSN2_CANAL	HSF_CANAL	CZF1_CANAL	EPL1_CANAL	MED14_CANAL	CRZ2_CANAL	MCM1_CANAL	MED21_CANAL	FKH2_CANAL	ACE2_CANAL	CRZ1_CANAL	SKO1_CANAL	MED6_CANAL	SPT20_CANAL	STP2_CANAL	SSN8_CANAL	SFL1_CANAL	SFL2_CANAL	RPN4_CANAL	RFG1_CANAL	RFX1_CANAL	TEC1_CANAL	ADR1_CANAL	CAS5_CANAL	BCR1_CANAL	CBK1_CANAL	A0A1D8PRN4_CANAL	A0A1D8PKF2_CANAL	A0A1D8PJZ6_CANAL	A0A1D8PRH8_CANAL	A0A1D8PIC1_CANAL	A0A1D8PIE8_CANAL	A0A1D8PFD3_CANAL	A0A1D8PP44_CANAL	A0A1D8PNK6_CANAL	A0A1D8PNN1_CANAL	Q5ACU9_CANAL	A0A1D8PEG7_CANAL
biological_process	GO:0045944	positive regulation of transcription by RNA polymerase II	49	105	0.466667	1	5.0351e-15	1	0	PACC_CANAL	EFG1_CANAL	MCM1_CANAL	GAT1_CANAL	INO80_CANAL	STP2_CANAL	SSN8_CANAL	SFL2_CANAL	WOR1_CANAL	MRR1_CANAL	TEC1_CANAL	GZF3_CANAL	EFH1_CANAL	ASG1_CANAL	A0A1D8PRN4_CANAL	A0A1D8PME6_CANAL	A0A1D8PCY0_CANAL	A0A1D8PRB7_CANAL	A0A1D8PNI3_CANAL	A0A1D8PP44_CANAL	A0A1D8PR21_CANAL	Q5ACU9_CANAL	Q5ANG4_CANAL	A0A1D8PL89_CANAL	A0A1D8PNM8_CANAL	Q5ADP3_CANAL	A0A1D8PMZ4_CANAL	A0A1D8PP04_CANAL	Q5A766_CANAL	A0A1D8PNT2_CANAL	A0A1D8PGH7_CANAL	Q5AG95_CANAL	Q5A683_CANAL	A0A1D8PL95_CANAL	A0A1D8PNH8_CANAL	A0A1D8PNF7_CANAL	Q59TU4_CANAL	A0A1D8PMD1_CANAL	Q5APB2_CANAL	Q59T43_CANAL
biological_process	GO:0044182	filamentous growth of a population of unicellular organisms	48	161	0.298137	1	2.13412e-07	1	0	PACC_CANAL	SCH9_CANAL	MCM1_CANAL	PALA_CANAL	CPH1_CANAL	RFX2_CANAL	SFL2_CANAL	SSK1_CANAL	WOR1_CANAL	TUP1_CANAL	TEC1_CANAL	GIN4_CANAL	ASH1_CANAL	CG13_CANAL	A0A1D8PH81_CANAL	A0A1D8PRF5_CANAL	A0A1D8PJZ6_CANAL	A0A1D8PLL4_CANAL	Q5AHB5_CANAL	A0A1D8PFV9_CANAL	A0A1D8PU03_CANAL	A0A1D8PIK2_CANAL	A0A1D8PS14_CANAL	A0A1D8PFH4_CANAL	A0A1D8PS50_CANAL	A0A1D8PFD3_CANAL	A0A1D8PP44_CANAL	A0A1D8PEG7_CANAL	A0A1D8PSW1_CANAL	A0A1D8PDR1_CANAL	Q5ADP3_CANAL	A0A1D8PMZ4_CANAL	A0A1D8PH05_CANAL	A0A1D8PN26_CANAL	Q59UR3_CANAL	A0A1D8PN61_CANAL	A0A1D8PFE0_CANAL	A0A1D8PMD1_CANAL	Q5APB2_CANAL	A0A1D8PM73_CANAL
biological_process	GO:0006355	regulation of transcription, DNA-templated	33	66	0.5	1	2.04786e-35	1	0	SEF1_CANAL	CPH1_CANAL	CRZ1_CANAL	NOT3_CANAL	SET2_CANAL	WOR1_CANAL	RFG1_CANAL	TEC1_CANAL	AF9_CANAL	BRG1_CANAL	ADF1_CANAL	AP1_CANAL	A0A1D8PD52_CANAL	A0A1D8PIP3_CANAL	Q59M50_CANAL	A0A1D8PIK2_CANAL	Q5ADX8_CANAL	A0A1D8PIG1_CANAL	A0A1D8PLY0_CANAL	A0A1D8PGW0_CANAL	A0A1D8PH05_CANAL	A0A1D8PN26_CANAL	Q59UR3_CANAL	Q5A683_CANAL	Q5ALK1_CANAL	A0A1D8PQ25_CANAL	Q59T43_CANAL	A0A1D8PND3_CANAL	Q5AKV1_CANAL	A0A1D8PKB5_CANAL	A0A1D8PNP8_CANAL	A0A1D8PCJ9_CANAL	A0A1D8PGK4_CANAL
biological_process	GO:0035556	intracellular signal transduction	24	46	0.521739	1	1.59878e-09	1	0	SCH9_CANAL	ERK1_CANAL	DBF2_CANAL	GIN4_CANAL	CLA4_CANAL	CBK1_CANAL	A0A1D8PPB9_CANAL	Q5ANK2_CANAL	A0A1D8PQP3_CANAL	A0A1D8PHP6_CANAL	Q5A650_CANAL	A0A1D8PKQ6_CANAL	Q59TB3_CANAL	A0A1D8PK98_CANAL	A0A1D8PJ04_CANAL	Q59VY9_CANAL	A0A1D8PN61_CANAL	A0A1D8PRN8_CANAL	Q59WD8_CANAL	A0A1D8PDS9_CANAL	A0A1D8PT49_CANAL	Q5AH90_CANAL	A0A1D8PDY7_CANAL	Q59UZ0_CANAL
biological_process	GO:0006468	protein phosphorylation	23	57	0.403509	1	1.39013e-10	1	0	SSN3_CANAL	PRK1_CANAL	GIN4_CANAL	CLA4_CANAL	A0A1D8PH81_CANAL	Q5ANK2_CANAL	Q5A5P2_CANAL	Q5A650_CANAL	A0A1D8PKQ6_CANAL	Q59TB3_CANAL	A0A1D8PK98_CANAL	A0A1D8PJ04_CANAL	Q59VY9_CANAL	A0A1D8PPK3_CANAL	Q59WD8_CANAL	A0A1D8PT49_CANAL	A0A1D8PGM4_CANAL	A0A1D8PHD2_CANAL	A0A1D8PDA6_CANAL	A0A1D8PI07_CANAL	A0A1D8PDY7_CANAL	A0A1D8PHU1_CANAL	Q59UZ0_CANAL
biological_process	GO:1900445	positive regulation of filamentous growth of a population of unicellular organisms in response to biotic stimulus	21	36	0.583333	1	3.53793e-08	1	0	ERK1_CANAL	CPH1_CANAL	CRZ1_CANAL	MOB2_CANAL	SPT6_CANAL	SSK1_CANAL	TEC1_CANAL	ASH1_CANAL	CLA4_CANAL	A0A1D8PME2_CANAL	A0A1D8PQP3_CANAL	Q5A3L9_CANAL	A0A1D8PRB7_CANAL	Q5ACU9_CANAL	A0A1D8PN26_CANAL	Q59UR3_CANAL	A0A1D8PFP2_CANAL	A0A1D8PJG1_CANAL	A0A1D8PK74_CANAL	A0A1D8PHU1_CANAL	A0A1D8PGK4_CANAL
biological_process	GO:0000122	negative regulation of transcription by RNA polymerase II	21	38	0.552632	1	2.17659e-07	1	0	SSN3_CANAL	GAT1_CANAL	RFX2_CANAL	SWC4_CANAL	TUP1_CANAL	RFG1_CANAL	GZF3_CANAL	EFH1_CANAL	ASH1_CANAL	A0A1D8PKT0_CANAL	A0A1D8PCC3_CANAL	Q5ANG4_CANAL	A0A1D8PL89_CANAL	Q5ADP3_CANAL	A0A1D8PP04_CANAL	A0A1D8PGE3_CANAL	A0A1D8PUC3_CANAL	Q59TU4_CANAL	A0A1D8PTJ0_CANAL	A0A1D8PQN1_CANAL	A0A1D8PGK8_CANAL
biological_process	GO:0006351	transcription, DNA-templated	17	40	0.425	1	1.76192e-34	1	0	SEF1_CANAL	MRR1_CANAL	ASG1_CANAL	A0A1D8PLH4_CANAL	A0A1D8PME2_CANAL	A0A1D8PCY0_CANAL	A0A1D8PRB7_CANAL	A0A1D8PNI3_CANAL	A0A1D8PNM8_CANAL	Q5A766_CANAL	A0A1D8PGH7_CANAL	Q5AF55_CANAL	A0A1D8PFP2_CANAL	A0A1D8PGH3_CANAL	Q5AAV6_CANAL	A0A1D8PKB5_CANAL	A0A1D8PK74_CANAL
biological_process	GO:1900430	positive regulation of filamentous growth of a population of unicellular organisms	9	15	0.6	1	6.22021e-11	1	0	PACC_CANAL	PALA_CANAL	CPH1_CANAL	TEC1_CANAL	ASH1_CANAL	A0A1D8PMZ4_CANAL	A0A1D8PFN2_CANAL	Q59UR3_CANAL	A0A1D8PGK4_CANAL
biological_process	GO:0007165	signal transduction	6	28	0.214286	1	3.23511e-08	1	0	MOB2_CANAL	Q5ANK2_CANAL	Q59X47_CANAL	A0A1D8PRQ6_CANAL	Q5AKY0_CANAL	A0A1D8PT45_CANAL
biological_process	GO:0045893	positive regulation of transcription, DNA-templated	6	21	0.285714	1	4.43568e-15	1	0	RBF1_CANAL	A0A1D8PLL4_CANAL	A0A1D8PNI3_CANAL	A0A1D8PH73_CANAL	A0A1D8PF53_CANAL	A0A1D8PMS5_CANAL
biological_process	GO:0006366	transcription by RNA polymerase II	5	16	0.3125	1	9.17514e-32	1	0	INO80_CANAL	A0A1D8PN59_CANAL	A0A1D8PG88_CANAL	A0A1D8PCV8_CANAL	A0A1D8PQH0_CANAL
biological_process	GO:0010468	regulation of gene expression	4	13	0.307692	1	6.12858e-35	1	0	A0A1D8PM79_CANAL	A0A1D8PKT0_CANAL	Q5ADP3_CANAL	A0A1D8PQ55_CANAL
biological_process	GO:0060258	negative regulation of filamentous growth	3	8	0.375	1	8.47276e-07	1	0	SSN3_CANAL	Q5A5B4_CANAL	A0A1D8PHD2_CANAL
biological_process	GO:1900443	regulation of filamentous growth of a population of unicellular organisms in response to biotic stimulus	3	13	0.230769	1	5.35263e-07	1	0	CZF1_CANAL	A0A1D8PNM8_CANAL	Q5A766_CANAL
biological_process	GO:1900428	regulation of filamentous growth of a population of unicellular organisms	3	4	0.75	1	4.86272e-14	1	0	CPH1_CANAL	SSK1_CANAL	A0A1D8PHU1_CANAL
biological_process	GO:0080090	regulation of primary metabolic process	2	4	0.5	1	3.86348e-35	1	0	Q59X47_CANAL	Q5AKY0_CANAL
biological_process	GO:0032774	RNA biosynthetic process	1	1	1	1	3.45596e-35	1	0	FAL1_CANAL
biological_process	GO:0090033	positive regulation of filamentous growth	1	2	0.5	1	6.22021e-11	1	0	A0A1D8PN26_CANAL
biological_process	GO:0010570	regulation of filamentous growth	1	3	0.333333	1	1.58901e-14	1	0	A0A1D8PKB4_CANAL
biological_process	GO:0044260	cellular macromolecule metabolic process	1	1	1	1	1.82163e-13	1	0	A0A1D8PFV9_CANAL
biological_process	GO:0060255	regulation of macromolecule metabolic process	1	1	1	1	1.12396e-35	1	0	A0A1D8PCK0_CANAL
biological_process	GO:0051252	regulation of RNA metabolic process	1	2	0.5	1	1.78504e-42	1	0	A0A1D8PQ55_CANAL
biological_process	GO:1900190	regulation of single-species biofilm formation	1	1	1	1	1.09148e-07	1	0	A0A1D8PKB4_CANAL
biological_process	GO:0061013	regulation of mRNA catabolic process	1	1	1	1	3.92603e-07	1	0	Q5A5R5_CANAL
biological_process	GO:0016310	phosphorylation	0	5	0	1	1.28358e-07	1	0
biological_process	GO:0043170	macromolecule metabolic process	0	2	0	1	4.21018e-14	1	0
biological_process	GO:0016070	RNA metabolic process	0	3	0	1	4.11031e-23	1	0
biological_process	GO:0050896	response to stimulus	0	1	0	1	1.31826e-07	1	0
biological_process	GO:2000112	regulation of cellular macromolecule biosynthetic process	0	1	0	1	1.27615e-34	1	0
biological_process	GO:0044271	cellular nitrogen compound biosynthetic process	0	2	0	1	2.98136e-07	1	0
biological_process	GO:0019222	regulation of metabolic process	0	1	0	1	1.47953e-34	1	0
biological_process	GO:0006725	cellular aromatic compound metabolic process	0	1	0	1	1.38681e-09	1	0
biological_process	GO:0043488	regulation of mRNA stability	3	3	1	1	1.18784e-06	1	0.001	A0A1D8PJ46_CANAL	A0A1D8PFN4_CANAL	A0A1D8PCH2_CANAL
biological_process	GO:0018105	peptidyl-serine phosphorylation	15	24	0.625	1	2.08088e-06	1	0.002	SCH9_CANAL	DBF2_CANAL	CBK1_CANAL	A0A1D8PPB9_CANAL	A0A1D8PH81_CANAL	Q5ANK2_CANAL	A0A1D8PQP3_CANAL	Q5AAN6_CANAL	A0A1D8PHB0_CANAL	Q5AL00_CANAL	A0A1D8PKB4_CANAL	A0A1D8PTW7_CANAL	A0A1D8PP50_CANAL	A0A1D8PHD2_CANAL	Q59S64_CANAL
biological_process	GO:1900429	negative regulation of filamentous growth of a population of unicellular organisms	12	28	0.428571	1	1.94693e-06	1	0.002	RFX2_CANAL	SFL2_CANAL	TUP1_CANAL	CG13_CANAL	A0A1D8PLL4_CANAL	A0A1D8PFV9_CANAL	A0A1D8PFD3_CANAL	Q5ADP3_CANAL	A0A1D8PN61_CANAL	A0A1D8PFE0_CANAL	A0A1D8PEM3_CANAL	Q59NG2_CANAL
biological_process	GO:1900231	regulation of single-species biofilm formation on inanimate substrate	11	18	0.611111	0.999999	4.35661e-06	1	0.002	CZF1_CANAL	CRZ2_CANAL	CPH1_CANAL	WOR1_CANAL	TEC1_CANAL	Q5ACU9_CANAL	A0A1D8PTB4_CANAL	A0A1D8PM73_CANAL	A0A1D8PFP2_CANAL	A0A1D8PI64_CANAL	A0A1D8PHU1_CANAL
biological_process	GO:0043620	regulation of DNA-templated transcription in response to stress	1	1	1	0.999999	4.35661e-06	1	0.002	A0A1D8PE76_CANAL
biological_process	GO:0043487	regulation of RNA stability	0	1	0	1	1.94693e-06	1	0.002
biological_process	GO:0070784	regulation of growth of unicellular organism as a thread of attached cells	2	3	0.666667	0.999999	6.99689e-06	1	0.004	A0A1D8PNN1_CANAL	Q59TS6_CANAL
biological_process	GO:0045892	negative regulation of transcription, DNA-templated	4	9	0.444444	0.999997	8.64286e-06	1	0.007	TUP1_CANAL	A0A1D8PKT0_CANAL	A0A1D8PH70_CANAL	A0A1D8PNL1_CANAL
biological_process	GO:0006897	endocytosis	20	55	0.363636	0.999995	1.50503e-05	1	0.009	IRS4_CANAL	SLA1_CANAL	PAN1_CANAL	MYO5_CANAL	A0A1D8PRF5_CANAL	Q5ADS1_CANAL	A0A1D8PU03_CANAL	Q5ADR3_CANAL	A0A1D8PSD9_CANAL	A0A1D8PJ75_CANAL	A0A1D8PIG1_CANAL	A0A1D8PQP1_CANAL	A0A1D8PGB7_CANAL	Q5A881_CANAL	A0A1D8PKB4_CANAL	A0A1D8PGL6_CANAL	A0A1D8PTP5_CANAL	Q59S64_CANAL	A0A1D8PNI0_CANAL	A0A1D8PF53_CANAL
biological_process	GO:0043618	regulation of transcription from RNA polymerase II promoter in response to stress	1	4	0.25	0.999998	1.41576e-05	1	0.009	INO80_CANAL
biological_process	GO:0051276	chromosome organization	0	3	0	0.99999	1.83408e-05	1	0.01
biological_process	GO:0016560	protein import into peroxisome matrix, docking	6	6	1	1	2.74088e-05	1	0.024	PEX5_CANAL	A0A1D8PPS0_CANAL	A0A1D8PSW1_CANAL	A0A1D8PTW0_CANAL	Q59WW3_CANAL	A0A1D8PDU5_CANAL
biological_process	GO:0017148	negative regulation of translation	4	7	0.571429	0.999991	3.65342e-05	1	0.032	CAF20_CANAL	A0A1D8PRG1_CANAL	A0A1D8PJ46_CANAL	A0A1D8PFN4_CANAL
biological_process	GO:0061014	positive regulation of mRNA catabolic process	2	2	1	0.999993	3.2892e-05	1	0.032	A0A1D8PJ46_CANAL	A0A1D8PFN4_CANAL
biological_process	GO:0006402	mRNA catabolic process	1	2	0.5	0.999987	3.80446e-05	1	0.032	SSD1_CANAL
biological_process	GO:0070783	growth of unicellular organism as a thread of attached cells	10	20	0.5	0.999981	6.46315e-05	1	0.042	WOR2_CANAL	Q5A3L9_CANAL	A0A1D8PNC6_CANAL	A0A1D8PNN1_CANAL	A0A1D8PNM8_CANAL	Q5A766_CANAL	Q59TS6_CANAL	Q59KX3_CANAL	A0A1D8PLA4_CANAL	A0A1D8PK74_CANAL
biological_process	GO:0000288	nuclear-transcribed mRNA catabolic process, deadenylation-dependent decay	4	5	0.8	0.999986	6.75856e-05	1	0.043	A0A1D8PQD2_CANAL	A0A1D8PNF9_CANAL	A0A1D8PMA5_CANAL	Q59YE8_CANAL
biological_process	GO:0007049	cell cycle	8	25	0.32	0.999959	7.17501e-05	1	0.045	EPL1_CANAL	ERK1_CANAL	MOB2_CANAL	TBF1_CANAL	AMN1_CANAL	A0A1D8PTC8_CANAL	A0A1D8PJZ1_CANAL	A0A1D8PMS5_CANAL
biological_process	GO:0044772	mitotic cell cycle phase transition	4	5	0.8	0.99997	8.10498e-05	1	0.049	CG11_CANAL	CG21_CANAL	HGC1_CANAL	CG13_CANAL
biological_process	GO:0051726	regulation of cell cycle	3	13	0.230769	0.999937	0.00013792	1	0.078	CG13_CANAL	A0A1D8PHK4_CANAL	A0A1D8PSZ1_CANAL
biological_process	GO:1900436	positive regulation of filamentous growth of a population of unicellular organisms in response to starvation	12	23	0.521739	0.999975	0.000147489	1	0.087	SCH9_CANAL	ERK1_CANAL	CPH1_CANAL	CRZ1_CANAL	SPT6_CANAL	SSK1_CANAL	ASH1_CANAL	CLA4_CANAL	A0A1D8PJZ6_CANAL	A0A1D8PN26_CANAL	A0A1D8PJG1_CANAL	A0A1D8PHU1_CANAL
biological_process	GO:0006607	NLS-bearing protein import into nucleus	5	5	1	1	0.000158295	1	0.116	A0A1D8PS91_CANAL	A0A1D8PMK3_CANAL	A0A1D8PLY0_CANAL	A0A1D8PMU8_CANAL	A0A1D8PFQ0_CANAL
biological_process	GO:0000147	actin cortical patch assembly	6	7	0.857143	0.999995	0.000163419	1	0.129	PRK1_CANAL	SLA1_CANAL	PAN1_CANAL	MYO5_CANAL	A0A1D8PRF5_CANAL	Q5A5P2_CANAL
biological_process	GO:1901987	regulation of cell cycle phase transition	1	1	1	0.999937	0.000166879	1	0.13	Q5A5B4_CANAL
biological_process	GO:0036177	filamentous growth of a population of unicellular organisms in response to pH	6	18	0.333333	0.999926	0.000214003	1	0.143	PACC_CANAL	PALA_CANAL	A0A1D8PKT0_CANAL	Q5AHB5_CANAL	Q5ACU9_CANAL	A0A1D8PFP3_CANAL
biological_process	GO:0061157	mRNA destabilization	0	2	0	0.999941	0.000248571	1	0.15
biological_process	GO:1900434	regulation of filamentous growth of a population of unicellular organisms in response to starvation	0	1	0	0.999954	0.000248746	1	0.153
biological_process	GO:0071840	cellular component organization or biogenesis	1	1	1	0.999764	0.000321564	1	0.185	A0A1D8PF53_CANAL
biological_process	GO:0071467	cellular response to pH	4	18	0.222222	0.999869	0.000355536	1	0.204	PACC_CANAL	PALA_CANAL	A0A1D8PKT0_CANAL	Q5AHB5_CANAL
biological_process	GO:0036244	cellular response to neutral pH	18	46	0.391304	0.999888	0.000380073	1	0.211	PACC_CANAL	GDA1_CANAL	PALA_CANAL	MOB2_CANAL	SFL2_CANAL	SSK1_CANAL	CBK1_CANAL	A0A1D8PH81_CANAL	A0A1D8PJ86_CANAL	A0A1D8PN26_CANAL	Q59UR3_CANAL	A0A1D8PFP3_CANAL	A0A1D8PJG1_CANAL	Q59MQ8_CANAL	Q59LK7_CANAL	Q5A747_CANAL	A0A1D8PSH4_CANAL	A0A1D8PGK4_CANAL
biological_process	GO:0036180	filamentous growth of a population of unicellular organisms in response to biotic stimulus	60	233	0.257511	0.999774	0.000408981	1	0.218	CZF1_CANAL	IRS4_CANAL	ERK1_CANAL	CPH1_CANAL	CRZ1_CANAL	MOB2_CANAL	SPT6_CANAL	SFL2_CANAL	SSK1_CANAL	VAC8_CANAL	TUP1_CANAL	TEC1_CANAL	ASH1_CANAL	CLA4_CANAL	CBK1_CANAL	A0A1D8PH81_CANAL	A0A1D8PQ17_CANAL	A0A1D8PME2_CANAL	A0A1D8PQP3_CANAL	A0A1D8PU07_CANAL	Q5A3L9_CANAL	A0A1D8PFV9_CANAL	Q59M50_CANAL	Q59PA6_CANAL	A0A1D8PU03_CANAL	A0A1D8PNC6_CANAL	A0A1D8PRB7_CANAL	Q5A8L5_CANAL	A0A1D8PS50_CANAL	A0A1D8PFD3_CANAL	A0A1D8PQD2_CANAL	A0A1D8PCC3_CANAL	A0A1D8PJ86_CANAL	A0A1D8PRE0_CANAL	Q5ACU9_CANAL	A0A1D8PGH4_CANAL	A0A1D8PNM8_CANAL	Q5A766_CANAL	Q59VY9_CANAL	A0A1D8PRZ6_CANAL
biological_process	GO:0044114	development of symbiont in host	8	13	0.615385	0.999948	0.000460181	1	0.245	SCH9_CANAL	CPH1_CANAL	TUP1_CANAL	CAS5_CANAL	CLA4_CANAL	Q59WV9_CANAL	A0A1D8PEG3_CANAL	A0A1D8PHU1_CANAL
biological_process	GO:0036176	response to neutral pH	1	3	0.333333	0.999734	0.00075011	1	0.338	ASH1_CANAL
biological_process	GO:0034063	stress granule assembly	5	6	0.833333	0.999973	0.000812728	1	0.393	DHH1_CANAL	Q5ANK2_CANAL	Q5A7K7_CANAL	A0A1D8PFP3_CANAL	Q5AAR2_CANAL
biological_process	GO:0000289	nuclear-transcribed mRNA poly(A) tail shortening	5	8	0.625	0.999918	0.000814469	1	0.408	CCR4_CANAL	PAN3_CANAL	NOT3_CANAL	VTS1_CANAL	A0A1D8PRG1_CANAL
biological_process	GO:0070786	positive regulation of growth of unicellular organism as a thread of attached cells	4	7	0.571429	0.999918	0.000814469	1	0.408	Q5A3L9_CANAL	Q59KX3_CANAL	A0A1D8PLA4_CANAL	A0A1D8PK74_CANAL
biological_process	GO:0007155	cell adhesion	17	43	0.395349	0.999629	0.000848674	1	0.419	TRY5_CANAL	EFG1_CANAL	CRZ2_CANAL	MCM1_CANAL	AFT2_CANAL	BUD4_CANAL	ACE2_CANAL	SEC31_CANAL	WOR1_CANAL	UME6_CANAL	TEC1_CANAL	BRG1_CANAL	CAS5_CANAL	HWP1_CANAL	ADF1_CANAL	A0A1D8PD52_CANAL	Q59UR3_CANAL
biological_process	GO:0007124	pseudohyphal growth	7	12	0.583333	0.999855	0.000899946	1	0.425	CPH1_CANAL	EFH1_CANAL	A0A1D8PP13_CANAL	A0A1D8PIK2_CANAL	A0A1D8PFH4_CANAL	A0A1D8PE85_CANAL	A0A1D8PJG1_CANAL
biological_process	GO:0007163	establishment or maintenance of cell polarity	8	16	0.5	0.999677	0.000950285	1	0.53	RHO1_CANAL	MOB2_CANAL	CLA4_CANAL	CBK1_CANAL	Q5AKW2_CANAL	A0A1D8PS50_CANAL	A0A1D8PJ86_CANAL	Q59LK7_CANAL
biological_process	GO:0036178	filamentous growth of a population of unicellular organisms in response to neutral pH	19	55	0.345455	0.999662	0.000961319	1	0.539	PACC_CANAL	GDA1_CANAL	MOB2_CANAL	SFL2_CANAL	SSK1_CANAL	ASH1_CANAL	CBK1_CANAL	A0A1D8PH81_CANAL	Q59M50_CANAL	A0A1D8PJ86_CANAL	Q59UR3_CANAL	A0A1D8PFP3_CANAL	A0A1D8PJG1_CANAL	Q59MQ8_CANAL	Q59LK7_CANAL	Q5A747_CANAL	A0A1D8PSH4_CANAL	A0A1D8PI07_CANAL	A0A1D8PGK4_CANAL
biological_process	GO:0000956	nuclear-transcribed mRNA catabolic process	2	7	0.285714	0.99955	0.00112903	1	0.548	A0A1D8PNP9_CANAL	A0A1D8PFP3_CANAL
biological_process	GO:0000278	mitotic cell cycle	3	13	0.230769	0.99934	0.00116414	1	0.559	Q59T43_CANAL	A0A1D8PDH5_CANAL	A0A1D8PTD0_CANAL
biological_process	GO:0033047	regulation of mitotic sister chromatid segregation	0	1	0	0.999731	0.00134089	1	0.579
biological_process	GO:0070785	negative regulation of growth of unicellular organism as a thread of attached cells	4	5	0.8	0.999877	0.00142527	1	0.613	WOR2_CANAL	A0A1D8PNC6_CANAL	A0A1D8PNM8_CANAL	Q5A766_CANAL
biological_process	GO:0050684	regulation of mRNA processing	3	3	1	0.999877	0.00142527	1	0.613	SPT6_CANAL	A0A1D8PHP6_CANAL	A0A1D8PDS9_CANAL
biological_process	GO:1903338	regulation of cell wall organization or biogenesis	1	1	1	0.999877	0.00142527	1	0.613	A0A1D8PKB4_CANAL
biological_process	GO:0007114	cell budding	2	4	0.5	0.999725	0.00152478	1	0.627	CG13_CANAL	A0A1D8PLB6_CANAL
biological_process	GO:0031929	TOR signaling	4	7	0.571429	0.999556	0.00163811	1	0.632	OMA1_CANAL	A0A1D8PDD8_CANAL	Q5AAN6_CANAL	Q5A2C3_CANAL
biological_process	GO:0071280	cellular response to copper ion	8	15	0.533333	0.999742	0.00165646	1	0.648	PACC_CANAL	CRZ2_CANAL	TUP1_CANAL	GZF3_CANAL	Q5ACU9_CANAL	A0A1D8PN26_CANAL	A0A1D8PMD1_CANAL	A0A1D8PE35_CANAL
biological_process	GO:0016558	protein import into peroxisome matrix	5	11	0.454545	0.999742	0.00165646	1	0.648	PEX5_CANAL	A0A1D8PTW0_CANAL	Q59WW3_CANAL	A0A1D8PEX2_CANAL	Q59ZE6_CANAL
biological_process	GO:0016192	vesicle-mediated transport	5	43	0.116279	0.998646	0.00217318	1	0.707	A0A1D8PQ45_CANAL	Q59KG7_CANAL	Q59TV8_CANAL	Q5AH58_CANAL	A0A1D8PFI0_CANAL
biological_process	GO:0006401	RNA catabolic process	1	10	0.1	0.998926	0.00224352	1	0.709	A0A1D8PIB8_CANAL
biological_process	GO:0044011	single-species biofilm formation on inanimate substrate	26	89	0.292135	0.998917	0.00235644	1	0.712	SSN2_CANAL	CZF1_CANAL	CRZ2_CANAL	PMT1_CANAL	MOB2_CANAL	WOR1_CANAL	TEC1_CANAL	CAS5_CANAL	CBK1_CANAL	A0A1D8PH81_CANAL	A0A1D8PJZ6_CANAL	A0A1D8PJ86_CANAL	Q5ACU9_CANAL	A0A1D8PEG7_CANAL	A0A1D8PE53_CANAL	Q5A876_CANAL	A0A1D8PTB4_CANAL	A0A1D8PM73_CANAL	A0A1D8PFP2_CANAL	A0A1D8PFP3_CANAL	A0A1D8PND3_CANAL	Q59LK7_CANAL	A0A1D8PEH1_CANAL	A0A1D8PNI0_CANAL	A0A1D8PSH4_CANAL	A0A1D8PHU1_CANAL
biological_process	GO:0090110	COPII-coated vesicle cargo loading	5	7	0.714286	0.999837	0.002436	1	0.766	SEC23_CANAL	SEC24_CANAL	SEC31_CANAL	A0A1D8PQX8_CANAL	A0A1D8PGX7_CANAL
biological_process	GO:1900241	positive regulation of phenotypic switching	5	7	0.714286	0.999837	0.002436	1	0.766	CZF1_CANAL	WOR1_CANAL	WOR2_CANAL	EFH1_CANAL	A0A1D8PFN2_CANAL
biological_process	GO:0040020	regulation of meiotic nuclear division	1	1	1	0.999837	0.002436	1	0.766	A0A1D8PPK6_CANAL
biological_process	GO:0007346	regulation of mitotic cell cycle	1	6	0.166667	0.998913	0.00252921	1	0.775	CG21_CANAL
biological_process	GO:0034605	cellular response to heat	13	41	0.317073	0.999074	0.00261358	1	0.787	RFX2_CANAL	STP2_CANAL	SSK1_CANAL	GZF3_CANAL	CBK1_CANAL	Q5AKW2_CANAL	A0A1D8PJZ6_CANAL	Q59M50_CANAL	A0A1D8PNM8_CANAL	A0A1D8PMZ4_CANAL	A0A1D8PH05_CANAL	A0A1D8PN26_CANAL	A0A1D8PEG3_CANAL
biological_process	GO:0000079	regulation of cyclin-dependent protein serine/threonine kinase activity	8	15	0.533333	0.9995	0.00281281	1	0.806	CG11_CANAL	CG21_CANAL	HGC1_CANAL	CG13_CANAL	A0A1D8PDW6_CANAL	Q59RN8_CANAL	A0A1D8PN00_CANAL	A0A1D8PQ97_CANAL
biological_process	GO:0006109	regulation of carbohydrate metabolic process	4	5	0.8	0.9995	0.00281281	1	0.806	Q59X47_CANAL	Q5AKY0_CANAL	A0A1D8PN26_CANAL	A0A1D8PN61_CANAL
biological_process	GO:0043619	regulation of transcription from RNA polymerase II promoter in response to oxidative stress	7	12	0.583333	0.99954	0.00306521	1	0.844	MNL1_CANAL	AP1_CANAL	A0A1D8PN26_CANAL	A0A1D8PM95_CANAL	A0A1D8PGE6_CANAL	A0A1D8PLA9_CANAL	A0A1D8PEH3_CANAL
biological_process	GO:0018107	peptidyl-threonine phosphorylation	7	12	0.583333	0.99954	0.00306521	1	0.844	PRK1_CANAL	IPL1_CANAL	A0A1D8PH81_CANAL	Q5A5P2_CANAL	Q5A650_CANAL	A0A1D8PP50_CANAL	A0A1D8PHD2_CANAL
biological_process	GO:0044010	single-species biofilm formation	1	4	0.25	0.998353	0.00329692	1	0.852	A0A1D8PS14_CANAL
biological_process	GO:1900433	positive regulation of filamentous growth of a population of unicellular organisms in response to heat	4	5	0.8	0.999842	0.0039327	1	0.918	CBK1_CANAL	A0A1D8PJZ6_CANAL	A0A1D8PMZ4_CANAL	A0A1D8PJG1_CANAL
biological_process	GO:0032888	regulation of mitotic spindle elongation	2	2	1	0.999842	0.0039327	1	0.918	A0A1D8PCM0_CANAL	Q5A4Z1_CANAL
biological_process	GO:0007094	mitotic spindle assembly checkpoint signaling	7	14	0.5	0.9991	0.00451313	1	0.932	YPI2_CANAL	A0A1D8PPK6_CANAL	A0A1D8PLR1_CANAL	A0A1D8PPB7_CANAL	A0A1D8PTW7_CANAL	Q59QR8_CANAL	Q59S64_CANAL
biological_process	GO:0006625	protein targeting to peroxisome	4	5	0.8	0.9991	0.00451313	1	0.932	PEX5_CANAL	A0A1D8PTW0_CANAL	Q59WW3_CANAL	Q59ZE6_CANAL
biological_process	GO:0009408	response to heat	0	5	0	0.997986	0.00507259	1	0.941
biological_process	GO:0007121	bipolar cellular bud site selection	3	3	1	1	0.00526199	1	0.983	CRZ1_CANAL	A0A1D8PFH4_CANAL	A0A1D8PE85_CANAL
biological_process	GO:0060963	positive regulation of ribosomal protein gene transcription by RNA polymerase II	3	3	1	1	0.00526199	1	0.983	Q5ANF0_CANAL	Q59U54_CANAL	A0A1D8PCG5_CANAL
biological_process	GO:0005979	regulation of glycogen biosynthetic process	2	2	1	1	0.00526199	1	0.983	A0A1D8PQN2_CANAL	Q5A932_CANAL
biological_process	GO:1900049	regulation of histone exchange	1	1	1	1	0.00526199	1	0.983	SET2_CANAL
biological_process	GO:0031532	actin cytoskeleton reorganization	1	1	1	1	0.00526199	1	0.983	Q5AKW2_CANAL
biological_process	GO:0033962	P-body assembly	4	6	0.666667	0.999443	0.0055675	1	0.987	DHH1_CANAL	A0A1D8PM60_CANAL	A0A1D8PTG5_CANAL	Q5AAR2_CANAL
biological_process	GO:0090114	COPII-coated vesicle budding	0	1	0	0.999186	0.00571187	1	0.99
biological_process	GO:0051123	RNA polymerase II preinitiation complex assembly	8	16	0.5	0.998271	0.00638378	1	0.991	Q5A350_CANAL	Q5ADM2_CANAL	A0A1D8PNT2_CANAL	Q5A876_CANAL	A0A1D8PGL0_CANAL	A0A1D8PE08_CANAL	Q5A886_CANAL	A0A1D8PSN1_CANAL
biological_process	GO:0030071	regulation of mitotic metaphase/anaphase transition	2	3	0.666667	0.997957	0.00686442	1	0.991	A0A1D8PPV4_CANAL	Q59ZY8_CANAL
biological_process	GO:0007010	cytoskeleton organization	1	7	0.142857	0.995586	0.00767733	1	0.993	A0A1D8PL12_CANAL
biological_process	GO:0016050	vesicle organization	0	3	0	0.996822	0.00761956	1	0.993
biological_process	GO:0010608	posttranscriptional regulation of gene expression	3	3	1	0.995815	0.00816879	1	0.995	A0A1D8PJ46_CANAL	A0A1D8PMA5_CANAL	A0A1D8PFN4_CANAL
biological_process	GO:0000070	mitotic sister chromatid segregation	4	11	0.363636	0.996103	0.00838135	1	0.996	CENPA_CANAL	A0A1D8PKA4_CANAL	A0A1D8PCM0_CANAL	Q5A4Z1_CANAL
biological_process	GO:1900743	positive regulation of filamentous growth of a population of unicellular organisms in response to pH	1	2	0.5	0.998344	0.00833726	1	0.996	Q5ACU9_CANAL
biological_process	GO:1900437	regulation of filamentous growth of a population of unicellular organisms in response to chemical stimulus	0	1	0	0.998344	0.00833726	1	0.996
biological_process	GO:1900239	regulation of phenotypic switching	4	13	0.307692	0.997545	0.0101392	1	0.998	CZF1_CANAL	WOR1_CANAL	Q5ADX8_CANAL	A0A1D8PHU1_CANAL
biological_process	GO:0006900	vesicle budding from membrane	2	4	0.5	0.997545	0.0101392	1	0.998	A0A1D8PL36_CANAL	A0A1D8PM89_CANAL
biological_process	GO:0045859	regulation of protein kinase activity	2	3	0.666667	0.997124	0.00917365	1	0.998	Q59X47_CANAL	Q5AKY0_CANAL
biological_process	GO:0070897	transcription preinitiation complex assembly	1	3	0.333333	0.997124	0.00917365	1	0.998	TF3B_CANAL
biological_process	GO:0007091	metaphase/anaphase transition of mitotic cell cycle	1	5	0.2	0.997124	0.00917365	1	0.998	A0A1D8PRX3_CANAL
biological_process	GO:0031669	cellular response to nutrient levels	0	2	0	0.993694	0.00979555	1	0.998
biological_process	GO:0043549	regulation of kinase activity	0	1	0	0.996884	0.00930173	1	0.998
biological_process	GO:0009267	cellular response to starvation	46	197	0.233503	0.984933	0.0226349	1	1	SCH9_CANAL	CZF1_CANAL	IRS4_CANAL	ERK1_CANAL	PMT1_CANAL	CPH1_CANAL	CRZ1_CANAL	MOB2_CANAL	SPT6_CANAL	SSK1_CANAL	TUP1_CANAL	ASH1_CANAL	CLA4_CANAL	CBK1_CANAL	A0A1D8PQ17_CANAL	A0A1D8PJZ6_CANAL	A0A1D8PU07_CANAL	A0A1D8PFV9_CANAL	A0A1D8PU03_CANAL	A0A1D8PMB6_CANAL	Q5A8L5_CANAL	A0A1D8PS50_CANAL	A0A1D8PFD3_CANAL	A0A1D8PQD2_CANAL	A0A1D8PCC3_CANAL	A0A1D8PJ86_CANAL	A0A1D8PRE0_CANAL	A0A1D8PGH4_CANAL	Q59VY9_CANAL	A0A1D8PRZ6_CANAL	Q5A2C3_CANAL	A0A1D8PM73_CANAL	Q5A5T3_CANAL	A0A1D8PTM6_CANAL	A0A1D8PFP3_CANAL	A0A1D8PJG1_CANAL	Q5A3K5_CANAL	Q5ADM4_CANAL	Q59LK7_CANAL	A0A1D8PPN1_CANAL
biological_process	GO:0036170	filamentous growth of a population of unicellular organisms in response to starvation	44	194	0.226804	0.980276	0.0300725	1	1	SCH9_CANAL	CZF1_CANAL	IRS4_CANAL	ERK1_CANAL	PMT1_CANAL	CPH1_CANAL	CRZ1_CANAL	MOB2_CANAL	SPT6_CANAL	SSK1_CANAL	TUP1_CANAL	ASH1_CANAL	CLA4_CANAL	CBK1_CANAL	A0A1D8PQ17_CANAL	A0A1D8PJZ6_CANAL	A0A1D8PU07_CANAL	A0A1D8PFV9_CANAL	A0A1D8PU03_CANAL	A0A1D8PMB6_CANAL	Q5A8L5_CANAL	A0A1D8PS50_CANAL	A0A1D8PFD3_CANAL	A0A1D8PQD2_CANAL	A0A1D8PCC3_CANAL	A0A1D8PJ86_CANAL	A0A1D8PRE0_CANAL	A0A1D8PGH4_CANAL	Q59VY9_CANAL	A0A1D8PRZ6_CANAL	A0A1D8PM73_CANAL	Q5A5T3_CANAL	A0A1D8PTM6_CANAL	A0A1D8PFP3_CANAL	A0A1D8PJG1_CANAL	Q5A3K5_CANAL	Q5ADM4_CANAL	Q59LK7_CANAL	A0A1D8PPN1_CANAL	Q5A352_CANAL
biological_process	GO:0031505	fungal-type cell wall organization	27	124	0.217742	0.898505	0.146542	1	1	IRS4_CANAL	ERK1_CANAL	CARP8_CANAL	PMT1_CANAL	CPH1_CANAL	MOB2_CANAL	SSN8_CANAL	SSK1_CANAL	PIR32_CANAL	CAS5_CANAL	CBK1_CANAL	Q5ANK2_CANAL	Q59M50_CANAL	A0A1D8PCT0_CANAL	Q5AB69_CANAL	A0A1D8PJ86_CANAL	A0A1D8PJ29_CANAL	Q5AEC0_CANAL	Q5A504_CANAL	A0A1D8PL95_CANAL	A0A1D8PRY4_CANAL	Q59LK7_CANAL	A0A1D8PFN9_CANAL	A0A1D8PI07_CANAL	A0A1D8PDR2_CANAL	A0A1D8PE76_CANAL	A0A1D8PKE1_CANAL
biological_process	GO:0030448	hyphal growth	19	69	0.275362	0.988519	0.0233596	1	1	SEC2_CANAL	SSN2_CANAL	GMT_CANAL	CRZ1_CANAL	MOB2_CANAL	SLA1_CANAL	VAC8_CANAL	CG13_CANAL	A0A1D8PRF5_CANAL	A0A1D8PFH4_CANAL	A0A1D8PS50_CANAL	Q5AMQ3_CANAL	Q5ACU9_CANAL	A0A1D8PKB4_CANAL	A0A1D8PNH8_CANAL	A0A1D8PLB6_CANAL	A0A1D8PK25_CANAL	A0A1D8PE85_CANAL	A0A1D8PDR2_CANAL
biological_process	GO:0006886	intracellular protein transport	18	79	0.227848	0.866241	0.170607	1	1	SEC23_CANAL	SEC24_CANAL	SEC31_CANAL	A0A1D8PPS9_CANAL	A0A1D8PQ45_CANAL	Q5ADR3_CANAL	A0A1D8PGX7_CANAL	A0A1D8PE70_CANAL	A0A1D8PGJ1_CANAL	Q5A006_CANAL	Q5AIB3_CANAL	Q59TV8_CANAL	Q5AH58_CANAL	A0A1D8PMA2_CANAL	A0A1D8PK25_CANAL	Q5AGY7_CANAL	A0A1D8PJB0_CANAL	A0A1D8PNI0_CANAL
biological_process	GO:0034599	cellular response to oxidative stress	16	87	0.183908	0.852514	0.212006	1	1	OCA1_CANAL	RFX2_CANAL	SSK1_CANAL	AP1_CANAL	Q5ANF0_CANAL	A0A1D8PRB7_CANAL	Q59U06_CANAL	Q5ACU9_CANAL	A0A1D8PJD1_CANAL	Q5AH29_CANAL	A0A1D8PTW7_CANAL	A0A1D8PTX2_CANAL	A0A1D8PE64_CANAL	A0A1D8PI07_CANAL	Q59NG2_CANAL	A0A1D8PH10_CANAL
biological_process	GO:0006364	rRNA processing	15	74	0.202703	0.161941	0.882319	1	1	RIX1_CANAL	RRP3_CANAL	A0A1D8PM79_CANAL	A0A1D8PSD9_CANAL	A0A1D8PRE0_CANAL	A0A1D8PL61_CANAL	A0A1D8PQQ7_CANAL	A0A1D8PUC3_CANAL	A0A1D8PTG5_CANAL	Q5A796_CANAL	A0A1D8PFP3_CANAL	A0A1D8PGM4_CANAL	A0A1D8PU19_CANAL	Q5A7N6_CANAL	A0A1D8PH70_CANAL
biological_process	GO:0015031	protein transport	14	82	0.170732	0.773344	0.270467	1	1	SEC2_CANAL	HSV2_CANAL	EXO70_CANAL	SNX41_CANAL	VTS1_CANAL	ATG13_CANAL	ATG4_CANAL	BCP1_CANAL	Q59LZ4_CANAL	Q59PS2_CANAL	A0A1D8PGG1_CANAL	A0A1D8PPZ2_CANAL	A0A1D8PRK4_CANAL	A0A1D8PNM2_CANAL
biological_process	GO:0006281	DNA repair	14	71	0.197183	0.512917	0.564693	1	1	SPT16_CANAL	EPL1_CANAL	DEF1_CANAL	INO80_CANAL	SWC4_CANAL	AF9_CANAL	ATM_CANAL	EAF1_CANAL	A0A1D8PJD1_CANAL	A0A1D8PGW0_CANAL	A0A1D8PN00_CANAL	A0A1D8PJZ1_CANAL	A0A1D8PRM6_CANAL	Q59NG2_CANAL
biological_process	GO:0051301	cell division	14	56	0.25	0.993626	0.0114116	1	1	CG11_CANAL	CG21_CANAL	ERK1_CANAL	MOB2_CANAL	NDC80_CANAL	HGC1_CANAL	AMN1_CANAL	Q59P88_CANAL	A0A1D8PTC8_CANAL	A0A1D8PSI8_CANAL	A0A1D8PRX3_CANAL	Q5AMH1_CANAL	A0A1D8PJK7_CANAL	A0A1D8PMS5_CANAL
biological_process	GO:0000398	mRNA splicing, via spliceosome	13	61	0.213115	0.789802	0.296339	1	1	PRP45_CANAL	PRP5_CANAL	CWC25_CANAL	BBP_CANAL	A0A1D8PH71_CANAL	A0A1D8PNP9_CANAL	A0A1D8PU52_CANAL	A0A1D8PS92_CANAL	A0A1D8PHF1_CANAL	A0A1D8PTG5_CANAL	A0A1D8PU02_CANAL	A0A1D8PFI2_CANAL	A0A1D8PFH7_CANAL
biological_process	GO:0006511	ubiquitin-dependent protein catabolic process	13	52	0.25	0.780879	0.282749	1	1	Q5A5Q4_CANAL	A0A1D8PP95_CANAL	A0A1D8PIM4_CANAL	A0A1D8PLB3_CANAL	A0A1D8PDT6_CANAL	A0A1D8PPB7_CANAL	A0A1D8PEM3_CANAL	A0A1D8PDI5_CANAL	Q5A675_CANAL	A0A1D8PTS8_CANAL	A0A1D8PJV5_CANAL	A0A1D8PPP6_CANAL	A0A1D8PLW8_CANAL
biological_process	GO:0036171	filamentous growth of a population of unicellular organisms in response to chemical stimulus	11	32	0.34375	0.995816	0.011972	1	1	PACC_CANAL	SCH9_CANAL	STP2_CANAL	TUP1_CANAL	Q59M50_CANAL	A0A1D8PMB6_CANAL	Q5ACU9_CANAL	A0A1D8PMZ4_CANAL	A0A1D8PN26_CANAL	A0A1D8PJZ1_CANAL	A0A1D8PDA6_CANAL
biological_process	GO:0006325	chromatin organization	11	32	0.34375	0.978476	0.0327621	1	1	SWC5_CANAL	AF9_CANAL	ATM_CANAL	EAF1_CANAL	ASH1_CANAL	A0A1D8PM79_CANAL	A0A1D8PIP3_CANAL	A0A1D8PNT2_CANAL	Q5A886_CANAL	A0A1D8PNJ5_CANAL	A0A1D8PGK4_CANAL
biological_process	GO:0006888	endoplasmic reticulum to Golgi vesicle-mediated transport	10	53	0.188679	0.957215	0.0783085	1	1	A0A1D8PFH1_CANAL	A0A1D8PIG1_CANAL	Q59PS2_CANAL	A0A1D8PMJ9_CANAL	A0A1D8PFN6_CANAL	Q5AIB3_CANAL	A0A1D8PMA2_CANAL	Q5AGY7_CANAL	A0A1D8PJB0_CANAL	A0A1D8PTP5_CANAL
biological_process	GO:0007015	actin filament organization	10	22	0.454545	0.951256	0.09334	1	1	RHO1_CANAL	PRK1_CANAL	MYO5_CANAL	A0A1D8PRF5_CANAL	Q5AKW2_CANAL	Q5ADS1_CANAL	A0A1D8PU03_CANAL	Q5A5P2_CANAL	A0A1D8PQP1_CANAL	A0A1D8PGB7_CANAL
biological_process	GO:1900189	positive regulation of cell adhesion involved in single-species biofilm formation	8	25	0.32	0.979707	0.0554404	1	1	CZF1_CANAL	CRZ2_CANAL	CAS5_CANAL	A0A1D8PJZ6_CANAL	A0A1D8PEG7_CANAL	Q5A876_CANAL	A0A1D8PND3_CANAL	A0A1D8PEH1_CANAL
biological_process	GO:0010811	positive regulation of cell-substrate adhesion	8	24	0.333333	0.979707	0.0554404	1	1	CZF1_CANAL	CRZ2_CANAL	CAS5_CANAL	A0A1D8PJZ6_CANAL	A0A1D8PEG7_CANAL	Q5A876_CANAL	A0A1D8PND3_CANAL	A0A1D8PEH1_CANAL
biological_process	GO:0036166	phenotypic switching	8	25	0.32	0.995816	0.011972	1	1	CZF1_CANAL	WOR1_CANAL	WOR2_CANAL	TUP1_CANAL	EFH1_CANAL	A0A1D8PIP3_CANAL	A0A1D8PFV9_CANAL	Q59NG2_CANAL
biological_process	GO:0009272	fungal-type cell wall biogenesis	8	27	0.296296	0.913583	0.147896	1	1	ERK1_CANAL	GDA1_CANAL	Q5ANK2_CANAL	Q5A8L5_CANAL	A0A1D8PL89_CANAL	Q5A753_CANAL	A0A1D8PQ19_CANAL	A0A1D8PNI0_CANAL
biological_process	GO:0043161	proteasome-mediated ubiquitin-dependent protein catabolic process	8	47	0.170213	0.48844	0.608759	1	1	RPN4_CANAL	A0A1D8PM68_CANAL	A0A1D8PGE3_CANAL	A0A1D8PR97_CANAL	A0A1D8PFL7_CANAL	A0A1D8PEM3_CANAL	A0A1D8PKI1_CANAL	Q5AGC6_CANAL
biological_process	GO:0044406	adhesion of symbiont to host	7	27	0.259259	0.984462	0.0398627	1	1	IRS4_CANAL	RFX2_CANAL	WOR1_CANAL	TEC1_CANAL	ADF1_CANAL	A0A1D8PD52_CANAL	Q59UR3_CANAL
biological_process	GO:0051701	biological process involved in interaction with host	7	26	0.269231	0.910997	0.146668	1	1	SEF1_CANAL	PMT1_CANAL	EFH1_CANAL	A0A1D8PLL4_CANAL	A0A1D8PRB7_CANAL	A0A1D8PNM8_CANAL	A0A1D8PKB4_CANAL
biological_process	GO:0007264	small GTPase mediated signal transduction	7	21	0.333333	0.981752	0.0383216	1	1	RHO1_CANAL	A0A1D8PS50_CANAL	A0A1D8PTC8_CANAL	Q5AMQ3_CANAL	A0A1D8PLJ2_CANAL	A0A1D8PHR4_CANAL	Q5AGW7_CANAL
biological_process	GO:0006338	chromatin remodeling	7	29	0.241379	0.960702	0.0673204	1	1	A0A1D8PJZ6_CANAL	A0A1D8PTY4_CANAL	A0A1D8PIC9_CANAL	A0A1D8PG88_CANAL	A0A1D8PCV8_CANAL	A0A1D8PDM2_CANAL	A0A1D8PCJ9_CANAL
biological_process	GO:0006397	mRNA processing	7	28	0.25	0.974723	0.0399043	1	1	PAN3_CANAL	DHH1_CANAL	PABP_CANAL	RNA14_CANAL	EDC1_CANAL	A0A1D8PIL7_CANAL	Q59Z67_CANAL
biological_process	GO:0000462	maturation of SSU-rRNA from tricistronic rRNA transcript (SSU-rRNA, 5.8S rRNA, LSU-rRNA)	7	35	0.2	0.234013	0.867158	1	1	FAL1_CANAL	A0A1D8PRE8_CANAL	Q5APD0_CANAL	A0A1D8PLN1_CANAL	A0A1D8PQQ7_CANAL	A0A1D8PJ43_CANAL	A0A1D8PJD3_CANAL
biological_process	GO:0006486	protein glycosylation	7	19	0.368421	0.293396	0.799158	1	1	GMT_CANAL	GDA1_CANAL	A0A1D8PMM6_CANAL	A0A1D8PQ19_CANAL	A0A1D8PGW8_CANAL	Q5A1A4_CANAL	Q5AHE5_CANAL
biological_process	GO:0006606	protein import into nucleus	7	36	0.194444	0.981837	0.0417778	1	1	Q59VX7_CANAL	A0A1D8PGB0_CANAL	A0A1D8PKH4_CANAL	A0A1D8PL86_CANAL	A0A1D8PQJ7_CANAL	A0A1D8PGN9_CANAL	Q5A4J5_CANAL
biological_process	GO:0016973	poly(A)+ mRNA export from nucleus	7	17	0.411765	0.995487	0.0183187	1	1	A0A1D8PTY4_CANAL	A0A1D8PMK3_CANAL	A0A1D8PGB0_CANAL	A0A1D8PRZ6_CANAL	A0A1D8PQE5_CANAL	A0A1D8PIF1_CANAL	A0A1D8PKD8_CANAL
biological_process	GO:0016567	protein ubiquitination	7	30	0.233333	0.574603	0.552235	1	1	A0A1D8PRX3_CANAL	A0A1D8PLB3_CANAL	A0A1D8PDR1_CANAL	A0A1D8PKD4_CANAL	A0A1D8PPB7_CANAL	A0A1D8PTS8_CANAL	A0A1D8PSH4_CANAL
biological_process	GO:0000920	septum digestion after cytokinesis	6	18	0.333333	0.954523	0.119561	1	1	ENG1_CANAL	MOB2_CANAL	CBK1_CANAL	A0A1D8PJ86_CANAL	A0A1D8PLB6_CANAL	Q59LK7_CANAL
biological_process	GO:0071285	cellular response to lithium ion	6	17	0.352941	0.981681	0.0602088	1	1	PACC_CANAL	PALA_CANAL	BRO1_CANAL	GZF3_CANAL	A0A1D8PDD8_CANAL	Q5ACU9_CANAL
biological_process	GO:0036168	filamentous growth of a population of unicellular organisms in response to heat	6	17	0.352941	0.981681	0.0602088	1	1	CBK1_CANAL	Q5AKW2_CANAL	A0A1D8PJZ6_CANAL	A0A1D8PMZ4_CANAL	A0A1D8PJG1_CANAL	A0A1D8PEG3_CANAL
biological_process	GO:0032968	positive regulation of transcription elongation from RNA polymerase II promoter	6	21	0.285714	0.926789	0.170618	1	1	SPT16_CANAL	CCR4_CANAL	SPT6_CANAL	A0A1D8PRG1_CANAL	A0A1D8PQN1_CANAL	A0A1D8PHD2_CANAL
biological_process	GO:0006368	transcription elongation from RNA polymerase II promoter	6	33	0.181818	0.591584	0.562777	1	1	SPT16_CANAL	CCR4_CANAL	SPT6_CANAL	Q59Y36_CANAL	A0A1D8PQN1_CANAL	A0A1D8PHD2_CANAL
biological_process	GO:0008104	protein localization	6	12	0.5	0.962455	0.049012	1	1	URE2_CANAL	A0A1D8PFH4_CANAL	Q5ANJ8_CANAL	Q5A881_CANAL	A0A1D8PJZ1_CANAL	A0A1D8PE85_CANAL
biological_process	GO:0031509	subtelomeric heterochromatin assembly	6	17	0.352941	0.981681	0.0602088	1	1	INO80_CANAL	A0A1D8PNK6_CANAL	A0A1D8PHW4_CANAL	A0A1D8PPV9_CANAL	A0A1D8PTJ0_CANAL	A0A1D8PI64_CANAL
biological_process	GO:0016197	endosomal transport	6	11	0.545455	0.972978	0.0506397	1	1	IRS4_CANAL	SLA1_CANAL	PAN1_CANAL	A0A1D8PPT0_CANAL	Q5AD30_CANAL	A0A1D8PF53_CANAL
biological_process	GO:0006891	intra-Golgi vesicle-mediated transport	6	23	0.26087	0.909878	0.199028	1	1	A0A1D8PHP4_CANAL	A0A1D8PIG1_CANAL	A0A1D8PFN6_CANAL	Q5A006_CANAL	A0A1D8PJB0_CANAL	A0A1D8PTP5_CANAL
biological_process	GO:1900442	positive regulation of filamentous growth of a population of unicellular organisms in response to neutral pH	6	13	0.461538	0.996935	0.0155007	1	1	SSK1_CANAL	ASH1_CANAL	CBK1_CANAL	Q59UR3_CANAL	A0A1D8PJG1_CANAL	A0A1D8PGK4_CANAL
biological_process	GO:0006470	protein dephosphorylation	6	23	0.26087	0.491516	0.66597	1	1	A0A1D8PU75_CANAL	Q59U06_CANAL	A0A1D8PLX9_CANAL	A0A1D8PRZ8_CANAL	A0A1D8PCN8_CANAL	A0A1D8PT49_CANAL
biological_process	GO:0006631	fatty acid metabolic process	6	12	0.5	0.384107	0.73179	1	1	PEX5_CANAL	A0A1D8PTW0_CANAL	Q59WW3_CANAL	Q59ZE6_CANAL	Q59MQ8_CANAL	Q59T80_CANAL
biological_process	GO:0006890	retrograde vesicle-mediated transport, Golgi to endoplasmic reticulum	6	22	0.272727	0.926789	0.170618	1	1	GET2_CANAL	Q5A006_CANAL	A0A1D8PPZ2_CANAL	A0A1D8PRK4_CANAL	A0A1D8PJB0_CANAL	A0A1D8PFF7_CANAL
biological_process	GO:0016579	protein deubiquitination	6	20	0.3	0.890966	0.229026	1	1	A0A1D8PP95_CANAL	A0A1D8PIM4_CANAL	A0A1D8PDT6_CANAL	A0A1D8PQC8_CANAL	Q5A675_CANAL	A0A1D8PFH9_CANAL
biological_process	GO:1900233	positive regulation of single-species biofilm formation on inanimate substrate	5	11	0.454545	0.994288	0.0290651	1	1	SSN2_CANAL	MOB2_CANAL	CBK1_CANAL	A0A1D8PJ86_CANAL	Q59LK7_CANAL
biological_process	GO:0006914	autophagy	5	21	0.238095	0.925414	0.119551	1	1	SNX41_CANAL	SNX4_CANAL	ATG4_CANAL	ATG9_CANAL	A0A1D8PNM2_CANAL
biological_process	GO:0071469	cellular response to alkaline pH	5	16	0.3125	0.954576	0.130588	1	1	PACC_CANAL	SEF1_CANAL	STP2_CANAL	A0A1D8PN26_CANAL	A0A1D8PE35_CANAL
biological_process	GO:1900439	positive regulation of filamentous growth of a population of unicellular organisms in response to chemical stimulus	5	11	0.454545	0.994288	0.0290651	1	1	PACC_CANAL	STP2_CANAL	Q5ACU9_CANAL	A0A1D8PMZ4_CANAL	A0A1D8PJZ1_CANAL
biological_process	GO:0006457	protein folding	5	44	0.113636	0.0747262	0.964914	1	1	A0A1D8PIB5_CANAL	A0A1D8PPM1_CANAL	Q59YH4_CANAL	A0A1D8PJ59_CANAL	A0A1D8PNX4_CANAL
biological_process	GO:0071555	cell wall organization	5	29	0.172414	0.883141	0.161756	1	1	ACE2_CANAL	SLA1_CANAL	BMT4_CANAL	A0A1D8PL94_CANAL	A0A1D8PNW1_CANAL
biological_process	GO:0006974	cellular response to DNA damage stimulus	5	24	0.208333	0.802981	0.249682	1	1	RFX1_CANAL	CDC14_CANAL	A0A1D8PDR1_CANAL	A0A1D8PCN8_CANAL	A0A1D8PLT5_CANAL
biological_process	GO:0006906	vesicle fusion	5	15	0.333333	0.957796	0.0992692	1	1	A0A1D8PGJ1_CANAL	Q5AIB3_CANAL	A0A1D8PK25_CANAL	Q5AGY7_CANAL	A0A1D8PNI0_CANAL
biological_process	GO:0000422	autophagy of mitochondrion	5	17	0.294118	0.954523	0.119561	1	1	HSV2_CANAL	ATG9_CANAL	A0A1D8PIN1_CANAL	A0A1D8PQP1_CANAL	Q5APK1_CANAL
biological_process	GO:0007052	mitotic spindle organization	5	19	0.263158	0.941448	0.123037	1	1	IPL1_CANAL	Q59P88_CANAL	A0A1D8PKA4_CANAL	Q5AMH1_CANAL	A0A1D8PTZ8_CANAL
biological_process	GO:0000902	cell morphogenesis	5	16	0.3125	0.977752	0.0495899	1	1	CBK1_CANAL	Q5AKW2_CANAL	A0A1D8PJZ6_CANAL	A0A1D8PJ86_CANAL	A0A1D8PHU1_CANAL
biological_process	GO:0000723	telomere maintenance	5	17	0.294118	0.92522	0.144564	1	1	ATM_CANAL	A0A1D8PIK2_CANAL	A0A1D8PRM6_CANAL	Q59NG2_CANAL	A0A1D8PF81_CANAL
biological_process	GO:0051278	fungal-type cell wall polysaccharide biosynthetic process	5	13	0.384615	0.941667	0.144053	1	1	A0A1D8PCT0_CANAL	A0A1D8PEJ0_CANAL	A0A1D8PQ19_CANAL	A0A1D8PGW8_CANAL	Q5AHE5_CANAL
biological_process	GO:0007059	chromosome segregation	4	17	0.235294	0.98635	0.0235973	1	1	Q59P88_CANAL	Q5A880_CANAL	A0A1D8PTW7_CANAL	A0A1D8PDB7_CANAL
biological_process	GO:0006887	exocytosis	4	18	0.222222	0.707325	0.482774	1	1	SEC2_CANAL	EXO70_CANAL	A0A1D8PMI1_CANAL	A0A1D8PNB6_CANAL
biological_process	GO:0030433	ubiquitin-dependent ERAD pathway	4	32	0.125	0.443535	0.730441	1	1	A0A1D8PKG7_CANAL	Q5A5Q4_CANAL	A0A1D8PIB5_CANAL	A0A1D8PNE9_CANAL
biological_process	GO:0001410	chlamydospore formation	4	17	0.235294	0.840087	0.342157	1	1	PACC_CANAL	SCH9_CANAL	CLA4_CANAL	Q5A747_CANAL
biological_process	GO:0044409	entry into host	4	10	0.4	0.970935	0.108476	1	1	PACC_CANAL	PALA_CANAL	TUP1_CANAL	A0A1D8PHU1_CANAL
biological_process	GO:0046777	protein autophosphorylation	4	9	0.444444	0.996959	0.01845	1	1	PRK1_CANAL	Q5A5P2_CANAL	Q5AL00_CANAL	A0A1D8PHD2_CANAL
biological_process	GO:0008643	carbohydrate transport	4	21	0.190476	0.413601	0.769557	1	1	SSN2_CANAL	GMT_CANAL	HUT1_CANAL	A0A1D8PG82_CANAL
biological_process	GO:0070481	nuclear-transcribed mRNA catabolic process, non-stop decay	4	13	0.307692	0.940051	0.177438	1	1	SSN3_CANAL	Q59Z54_CANAL	A0A1D8PHQ0_CANAL	A0A1D8PLY1_CANAL
biological_process	GO:0000727	double-strand break repair via break-induced replication	4	14	0.285714	0.919641	0.216269	1	1	A0A1D8PHW4_CANAL	A0A1D8PHD2_CANAL	A0A1D8PS48_CANAL	A0A1D8PFE6_CANAL
biological_process	GO:0000463	maturation of LSU-rRNA from tricistronic rRNA transcript (SSU-rRNA, 5.8S rRNA, LSU-rRNA)	4	24	0.166667	0.44694	0.744294	1	1	A0A1D8PQN7_CANAL	A0A1D8PE47_CANAL	A0A1D8PLM8_CANAL	Q59V85_CANAL
biological_process	GO:0006493	protein O-linked glycosylation	4	16	0.25	0.481541	0.716974	1	1	GDA1_CANAL	MNT2_CANAL	PMT1_CANAL	MNT4_CANAL
biological_process	GO:0007064	mitotic sister chromatid cohesion	4	11	0.363636	0.896026	0.257104	1	1	A0A1D8PF12_CANAL	A0A1D8PSI8_CANAL	A0A1D8PU88_CANAL	A0A1D8PJK7_CANAL
biological_process	GO:0043967	histone H4 acetylation	4	18	0.222222	0.808398	0.385172	1	1	EPL1_CANAL	SWC4_CANAL	AF9_CANAL	EAF1_CANAL
biological_process	GO:0030174	regulation of DNA-dependent DNA replication initiation	4	10	0.4	0.970935	0.108476	1	1	SET2_CANAL	A0A1D8PHW4_CANAL	A0A1D8PS48_CANAL	A0A1D8PFE6_CANAL
biological_process	GO:0043328	protein transport to vacuole involved in ubiquitin-dependent protein catabolic process via the multivesicular body sorting pathway	4	16	0.25	0.869412	0.299276	1	1	HSE1_CANAL	VPS27_CANAL	A0A1D8PM68_CANAL	Q5AGC6_CANAL
biological_process	GO:0098609	cell-cell adhesion	4	14	0.285714	0.855947	0.296895	1	1	MNT2_CANAL	TUP1_CANAL	ADF1_CANAL	A0A1D8PTB4_CANAL
biological_process	GO:0016584	nucleosome positioning	4	8	0.5	0.994433	0.0354088	1	1	INO80_CANAL	SPT6_CANAL	Q5ADP3_CANAL	A0A1D8PTJ0_CANAL
biological_process	GO:0034497	protein localization to phagophore assembly site	4	7	0.571429	0.997564	0.0204882	1	1	HSV2_CANAL	ATG13_CANAL	ATG9_CANAL	A0A1D8PFH1_CANAL
biological_process	GO:0051028	mRNA transport	4	14	0.285714	0.986667	0.0300375	1	1	DHH1_CANAL	PABP_CANAL	A0A1D8PLY0_CANAL	A0A1D8PKH4_CANAL
biological_process	GO:0034644	cellular response to UV	4	7	0.571429	0.954576	0.130588	1	1	RFX2_CANAL	A0A1D8PGE3_CANAL	A0A1D8PLU8_CANAL	Q59NG2_CANAL
biological_process	GO:0042147	retrograde transport, endosome to Golgi	4	25	0.16	0.481541	0.716974	1	1	SNX41_CANAL	A0A1D8PRW9_CANAL	Q5A881_CANAL	A0A1D8PPK3_CANAL
biological_process	GO:0032258	cytoplasm to vacuole transport by the Cvt pathway	4	12	0.333333	0.957146	0.141287	1	1	SNX4_CANAL	ATG9_CANAL	A0A1D8PFH1_CANAL	A0A1D8PHP4_CANAL
biological_process	GO:0016575	histone deacetylation	4	11	0.363636	0.840087	0.342157	1	1	SET2_CANAL	A0A1D8PR21_CANAL	A0A1D8PCC3_CANAL	A0A1D8PHC7_CANAL
biological_process	GO:0006383	transcription by RNA polymerase III	4	6	0.666667	0.741662	0.426705	1	1	TF3B_CANAL	A0A1D8PJI4_CANAL	A0A1D8PLP0_CANAL	A0A1D8PI64_CANAL
biological_process	GO:0000077	DNA damage checkpoint signaling	4	11	0.363636	0.739663	0.446216	1	1	ATM_CANAL	A0A1D8PF46_CANAL	A0A1D8PNH8_CANAL	A0A1D8PJZ1_CANAL
biological_process	GO:0000209	protein polyubiquitination	4	26	0.153846	0.351228	0.814162	1	1	A0A1D8PKG7_CANAL	A0A1D8PLB3_CANAL	A0A1D8PLC1_CANAL	Q5A933_CANAL
biological_process	GO:0000011	vacuole inheritance	4	9	0.444444	0.989255	0.0551397	1	1	VAC8_CANAL	Q59PA6_CANAL	A0A1D8PGH4_CANAL	A0A1D8PK25_CANAL
biological_process	GO:0030010	establishment of cell polarity	4	9	0.444444	0.988165	0.0336565	1	1	A0A1D8PU03_CANAL	A0A1D8PM39_CANAL	A0A1D8PMI1_CANAL	A0A1D8PE85_CANAL
biological_process	GO:0042274	ribosomal small subunit biogenesis	4	10	0.4	0.228508	0.852382	1	1	A0A1D8PP30_CANAL	A0A1D8PI86_CANAL	A0A1D8PTY4_CANAL	A0A1D8PGL7_CANAL
biological_process	GO:0031145	anaphase-promoting complex-dependent catabolic process	4	14	0.285714	0.919641	0.216269	1	1	A0A1D8PPV4_CANAL	A0A1D8PPK6_CANAL	A0A1D8PRX3_CANAL	Q59ZY8_CANAL
biological_process	GO:0007018	microtubule-based movement	4	8	0.5	0.97355	0.0732112	1	1	A0A1D8PKA4_CANAL	A0A1D8PIP2_CANAL	A0A1D8PU90_CANAL	Q5A3K5_CANAL
biological_process	GO:0042790	nucleolar large rRNA transcription by RNA polymerase I	4	17	0.235294	0.840087	0.342157	1	1	A0A1D8PQT8_CANAL	Q59LT9_CANAL	A0A1D8PGM4_CANAL	A0A1D8PH70_CANAL
biological_process	GO:0071028	nuclear mRNA surveillance	4	9	0.444444	0.869412	0.299276	1	1	A0A1D8PRZ6_CANAL	A0A1D8PHQ0_CANAL	A0A1D8PKD8_CANAL	A0A1D8PLY1_CANAL
biological_process	GO:0072583	clathrin-dependent endocytosis	4	7	0.571429	0.994433	0.0354088	1	1	A0A1D8PL36_CANAL	A0A1D8PE70_CANAL	Q59TV8_CANAL	A0A1D8PTM6_CANAL
biological_process	GO:0045040	protein insertion into mitochondrial outer membrane	3	12	0.25	0.858713	0.349152	1	1	MMM1_CANAL	A0A1D8PKC1_CANAL	A0A1D8PEX2_CANAL
biological_process	GO:0006378	mRNA polyadenylation	3	14	0.214286	0.896026	0.257104	1	1	FIP1_CANAL	A0A1D8PLB3_CANAL	A0A1D8PHH9_CANAL
biological_process	GO:0007035	vacuolar acidification	3	13	0.230769	0.822562	0.400666	1	1	Q59NG8_CANAL	A0A1D8PGH4_CANAL	A0A1D8PNI0_CANAL
biological_process	GO:0005975	carbohydrate metabolic process	3	44	0.0681818	0.346019	0.722841	1	1	A0A1D8PL94_CANAL	A0A1D8PT50_CANAL	A0A1D8PNW1_CANAL
biological_process	GO:0042273	ribosomal large subunit biogenesis	3	24	0.125	0.16483	0.903136	1	1	A0A1D8PSD9_CANAL	A0A1D8PI86_CANAL	A0A1D8PDH5_CANAL
biological_process	GO:0016573	histone acetylation	3	16	0.1875	0.913119	0.163171	1	1	A0A1D8PIP3_CANAL	A0A1D8PU33_CANAL	Q5A886_CANAL
biological_process	GO:1990277	parasexual conjugation with cellular fusion	3	7	0.428571	0.979512	0.106384	1	1	ERK1_CANAL	CPH1_CANAL	WOR1_CANAL
biological_process	GO:0070816	phosphorylation of RNA polymerase II C-terminal domain	3	11	0.272727	0.919641	0.216269	1	1	SSN3_CANAL	A0A1D8PQH0_CANAL	A0A1D8PHD2_CANAL
biological_process	GO:0006979	response to oxidative stress	3	10	0.3	0.947817	0.0809026	1	1	SSN3_CANAL	OXR1_CANAL	A0A1D8PQH0_CANAL
biological_process	GO:0006268	DNA unwinding involved in DNA replication	3	10	0.3	0.920401	0.24572	1	1	A0A1D8PHW4_CANAL	A0A1D8PS48_CANAL	A0A1D8PFE6_CANAL
biological_process	GO:0007118	budding cell apical bud growth	3	7	0.428571	0.964591	0.148969	1	1	CBK1_CANAL	A0A1D8PE85_CANAL	Q59LK7_CANAL
biological_process	GO:0006487	protein N-linked glycosylation	3	36	0.0833333	0.0690136	0.974351	1	1	GDA1_CANAL	MNT2_CANAL	A0A1D8PTC1_CANAL
biological_process	GO:0043547	positive regulation of GTPase activity	3	6	0.5	0.742896	0.499419	1	1	SEC23_CANAL	A0A1D8PMB6_CANAL	Q5AGW7_CANAL
biological_process	GO:0000032	cell wall mannoprotein biosynthetic process	3	15	0.2	0.742896	0.499419	1	1	MNT2_CANAL	A0A1D8PMM6_CANAL	A0A1D8PQ19_CANAL
biological_process	GO:0060237	regulation of fungal-type cell wall organization	3	5	0.6	0.996067	0.039872	1	1	CBK1_CANAL	Q5ANK2_CANAL	A0A1D8PHG7_CANAL
biological_process	GO:0007005	mitochondrion organization	3	18	0.166667	0.0216078	0.987447	0.993	1	A0A1D8PME0_CANAL	Q59WV9_CANAL	A0A1D8PMA5_CANAL
biological_process	GO:0006515	protein quality control for misfolded or incompletely synthesized proteins	3	9	0.333333	0.489713	0.735015	1	1	OMA1_CANAL	PNG1_CANAL	A0A1D8PME0_CANAL
biological_process	GO:0006612	protein targeting to membrane	3	14	0.214286	0.215493	0.891626	1	1	ERFB_CANAL	NACA_CANAL	A0A1D8PMU8_CANAL
biological_process	GO:0002098	tRNA wobble uridine modification	3	15	0.2	0.450546	0.764314	1	1	A0A1D8PL76_CANAL	A0A1D8PSF5_CANAL	A0A1D8PLN7_CANAL
biological_process	GO:0006629	lipid metabolic process	3	12	0.25	0.00247616	0.99856	0.408	1	IRS4_CANAL	Q59SS8_CANAL	A0A1D8PI33_CANAL
biological_process	GO:0098789	pre-mRNA cleavage required for polyadenylation	3	12	0.25	0.858713	0.349152	1	1	FIP1_CANAL	A0A1D8PLB3_CANAL	A0A1D8PTU2_CANAL
biological_process	GO:0030466	silent mating-type cassette heterochromatin assembly	3	14	0.214286	0.808398	0.385172	1	1	A0A1D8PNK6_CANAL	A0A1D8PHW4_CANAL	A0A1D8PTJ0_CANAL
biological_process	GO:0071500	cellular response to nitrosative stress	3	7	0.428571	0.964591	0.148969	1	1	Q59M50_CANAL	A0A1D8PGM5_CANAL	A0A1D8PD58_CANAL
biological_process	GO:0016226	iron-sulfur cluster assembly	3	19	0.157895	0.59096	0.622484	1	1	CAF17_CANAL	DRE2_CANAL	Q5ADN0_CANAL
biological_process	GO:0042783	evasion of host immune response	3	10	0.3	0.858713	0.349152	1	1	CPH1_CANAL	SSK1_CANAL	AP1_CANAL
biological_process	GO:0006508	proteolysis	3	21	0.142857	0.397338	0.666199	1	1	CARP8_CANAL	A0A1D8PME0_CANAL	A0A1D8PDN2_CANAL
biological_process	GO:0070417	cellular response to cold	3	4	0.75	0.996067	0.039872	1	1	CRZ2_CANAL	CAS5_CANAL	Q5ANK2_CANAL
biological_process	GO:0051321	meiotic cell cycle	3	17	0.176471	0.783725	0.298689	1	1	CDC14_CANAL	A0A1D8PRN4_CANAL	Q5ACU9_CANAL
biological_process	GO:0000750	pheromone-dependent signal transduction involved in conjugation with cellular fusion	3	12	0.25	0.700724	0.545606	1	1	ERK1_CANAL	A0A1D8PH43_CANAL	A0A1D8PTB4_CANAL
biological_process	GO:0000184	nuclear-transcribed mRNA catabolic process, nonsense-mediated decay	3	12	0.25	0.855947	0.296895	1	1	EDC1_CANAL	A0A1D8PL84_CANAL	A0A1D8PFP3_CANAL
biological_process	GO:0006808	regulation of nitrogen utilization	3	5	0.6	0.997564	0.0204882	1	1	GAT1_CANAL	URE2_CANAL	A0A1D8PDY7_CANAL
biological_process	GO:0030036	actin cytoskeleton organization	3	12	0.25	0.985632	0.027123	1	1	SLA1_CANAL	A0A1D8PRQ6_CANAL	A0A1D8PPT0_CANAL
biological_process	GO:0042766	nucleosome mobilization	3	5	0.6	0.996067	0.039872	1	1	INO80_CANAL	A0A1D8PTJ0_CANAL	A0A1D8PGZ6_CANAL
biological_process	GO:0006623	protein targeting to vacuole	3	24	0.125	0.605045	0.559697	1	1	VPS27_CANAL	BRO1_CANAL	A0A1D8PPK3_CANAL
biological_process	GO:0006078	(1->6)-beta-D-glucan biosynthetic process	3	11	0.272727	0.891524	0.297186	1	1	Q5AEC0_CANAL	Q5A504_CANAL	A0A1D8PKE1_CANAL
biological_process	GO:0071244	cellular response to carbon dioxide	3	7	0.428571	0.979512	0.106384	1	1	A0A1D8PP13_CANAL	Q5AB69_CANAL	A0A1D8PRZ8_CANAL
biological_process	GO:0006915	apoptotic process	3	7	0.428571	0.954576	0.130588	1	1	GIN4_CANAL	AP1_CANAL	A0A1D8PSZ1_CANAL
biological_process	GO:0006312	mitotic recombination	3	8	0.375	0.941667	0.144053	1	1	MSH3_CANAL	Q5AJ72_CANAL	Q59NG2_CANAL
biological_process	GO:0048278	vesicle docking	3	8	0.375	0.965409	0.0973359	1	1	A0A1D8PGJ1_CANAL	A0A1D8PK25_CANAL	A0A1D8PNI0_CANAL
biological_process	GO:0000226	microtubule cytoskeleton organization	3	13	0.230769	0.957215	0.0783085	1	1	CDC14_CANAL	A0A1D8PN61_CANAL	A0A1D8PRN8_CANAL
biological_process	GO:0006367	transcription initiation from RNA polymerase II promoter	3	25	0.12	0.894368	0.181814	1	1	A0A1D8PQH0_CANAL	A0A1D8PSS1_CANAL	Q5A886_CANAL
biological_process	GO:0006270	DNA replication initiation	3	22	0.136364	0.7957	0.348142	1	1	A0A1D8PJZ1_CANAL	A0A1D8PHD2_CANAL	A0A1D8PS48_CANAL
biological_process	GO:0007033	vacuole organization	3	17	0.176471	0.769124	0.337758	1	1	A0A1D8PU03_CANAL	A0A1D8PRW9_CANAL	A0A1D8PGH4_CANAL
biological_process	GO:0030242	autophagy of peroxisome	3	7	0.428571	0.964591	0.148969	1	1	Q5ANK2_CANAL	A0A1D8PFH1_CANAL	A0A1D8PPK3_CANAL
biological_process	GO:0051453	regulation of intracellular pH	3	5	0.6	0.922478	0.191602	1	1	BTN1_CANAL	Q5AHB5_CANAL	Q59NG8_CANAL
biological_process	GO:0000083	regulation of transcription involved in G1/S transition of mitotic cell cycle	3	7	0.428571	0.94486	0.195884	1	1	A0A1D8PCM9_CANAL	A0A1D8PJV0_CANAL	A0A1D8PDA6_CANAL
biological_process	GO:0006406	mRNA export from nucleus	3	17	0.176471	0.975256	0.0585515	1	1	A0A1D8PEU5_CANAL	A0A1D8PL86_CANAL	A0A1D8PGL7_CANAL
biological_process	GO:0034475	U4 snRNA 3'-end processing	3	10	0.3	0.920401	0.24572	1	1	A0A1D8PM79_CANAL	A0A1D8PHQ0_CANAL	A0A1D8PLY1_CANAL
biological_process	GO:0000753	cell morphogenesis involved in conjugation with cellular fusion	3	6	0.5	0.989255	0.0551397	1	1	A0A1D8PH43_CANAL	Q59WR6_CANAL	A0A1D8PLB6_CANAL
biological_process	GO:0006999	nuclear pore organization	3	6	0.5	0.979512	0.106384	1	1	A0A1D8PS91_CANAL	A0A1D8PLY0_CANAL	A0A1D8PFQ0_CANAL
biological_process	GO:0016075	rRNA catabolic process	3	10	0.3	0.614828	0.630009	1	1	A0A1D8PFP3_CANAL	A0A1D8PHQ0_CANAL	A0A1D8PLY1_CANAL
biological_process	GO:0006271	DNA strand elongation involved in DNA replication	3	11	0.272727	0.59096	0.622484	1	1	A0A1D8PHW4_CANAL	A0A1D8PS48_CANAL	A0A1D8PFE6_CANAL
biological_process	GO:0000749	response to pheromone triggering conjugation with cellular fusion	3	7	0.428571	0.829382	0.334035	1	1	Q5ADR3_CANAL	A0A1D8PTB4_CANAL	A0A1D8PJG1_CANAL
biological_process	GO:0045333	cellular respiration	3	16	0.1875	2.93038e-05	0.999995	0.005	1	A0A1D8PD60_CANAL	A0A1D8PJ62_CANAL	Q59T80_CANAL
biological_process	GO:0010737	protein kinase A signaling	3	4	0.75	0.999087	0.0183084	1	1	A0A1D8PT45_CANAL	A0A1D8PJG1_CANAL	A0A1D8PHU1_CANAL
biological_process	GO:0048280	vesicle fusion with Golgi apparatus	3	9	0.333333	0.94486	0.195884	1	1	A0A1D8PFN6_CANAL	Q5AIB3_CANAL	A0A1D8PMA2_CANAL
biological_process	GO:0006267	pre-replicative complex assembly involved in nuclear cell cycle DNA replication	3	6	0.5	0.989827	0.0695714	1	1	A0A1D8PHW4_CANAL	A0A1D8PS48_CANAL	A0A1D8PFE6_CANAL
biological_process	GO:0071230	cellular response to amino acid stimulus	3	4	0.75	0.989827	0.0695714	1	1	Q5A2C3_CANAL	Q5AD30_CANAL	A0A1D8PI64_CANAL
biological_process	GO:0000002	mitochondrial genome maintenance	2	20	0.1	0.264985	0.902896	1	1	MMM1_CANAL	A0A1D8PRM6_CANAL
biological_process	GO:0015914	phospholipid transport	2	7	0.285714	0.808398	0.385172	1	1	MMM1_CANAL	A0A1D8PR41_CANAL
biological_process	GO:0006879	cellular iron ion homeostasis	2	38	0.0526316	0.132842	0.935319	1	1	SEF1_CANAL	Q5ACZ8_CANAL
biological_process	GO:0030866	cortical actin cytoskeleton organization	2	6	0.333333	0.984462	0.0398627	1	1	MOB2_CANAL	A0A1D8PPS9_CANAL
biological_process	GO:0006506	GPI anchor biosynthetic process	2	26	0.0769231	0.0741905	0.980297	1	1	Q5A6L6_CANAL	A0A1D8PRY4_CANAL
biological_process	GO:0016485	protein processing	2	11	0.181818	0.0867526	0.966479	1	1	Q5AHB5_CANAL	A0A1D8PEG3_CANAL
biological_process	GO:0006412	translation	2	115	0.0173913	5.13288e-06	0.999998	0.001	1	Q59RQ4_CANAL	Q59YE8_CANAL
biological_process	GO:1900438	negative regulation of filamentous growth of a population of unicellular organisms in response to chemical stimulus	2	3	0.666667	0.994738	0.0803369	1	1	SCH9_CANAL	A0A1D8PCG5_CANAL
biological_process	GO:0032186	cellular bud neck septin ring organization	2	7	0.285714	0.893616	0.351204	1	1	Q5ANK2_CANAL	A0A1D8PJ80_CANAL
biological_process	GO:0034613	cellular protein localization	2	16	0.125	0.936819	0.0820923	1	1	A0A1D8PHB1_CANAL	A0A1D8PT49_CANAL
biological_process	GO:0010458	exit from mitosis	2	6	0.333333	0.954576	0.130588	1	1	GIN4_CANAL	A0A1D8PHB0_CANAL
biological_process	GO:0000082	G1/S transition of mitotic cell cycle	2	8	0.25	0.979707	0.0554404	1	1	CG13_CANAL	A0A1D8PT49_CANAL
biological_process	GO:0007030	Golgi organization	2	14	0.142857	0.770974	0.40904	1	1	A0A1D8PNM2_CANAL	A0A1D8PD30_CANAL
biological_process	GO:0006075	(1->3)-beta-D-glucan biosynthetic process	2	4	0.5	0.804116	0.482254	1	1	RHO1_CANAL	A0A1D8PCT0_CANAL
biological_process	GO:0000492	box C/D snoRNP assembly	2	6	0.333333	0.930429	0.281256	1	1	Q5AEK9_CANAL	A0A1D8PLM8_CANAL
biological_process	GO:0043486	histone exchange	2	12	0.166667	0.939791	0.159913	1	1	INO80_CANAL	SWC4_CANAL
biological_process	GO:0000027	ribosomal large subunit assembly	2	19	0.105263	0.297089	0.886907	1	1	A0A1D8PL61_CANAL	A0A1D8PU19_CANAL
biological_process	GO:0051666	actin cortical patch localization	2	14	0.142857	0.549044	0.729107	1	1	A0A1D8PRF5_CANAL	A0A1D8PS50_CANAL
biological_process	GO:0009306	protein secretion	2	19	0.105263	0.489713	0.735015	1	1	A0A1D8PFN6_CANAL	A0A1D8PNI0_CANAL
biological_process	GO:0000435	positive regulation of transcription from RNA polymerase II promoter by galactose	2	4	0.5	0.981692	0.142365	1	1	SSN3_CANAL	A0A1D8PF20_CANAL
biological_process	GO:1902953	positive regulation of ER to Golgi vesicle-mediated transport	2	4	0.5	0.981692	0.142365	1	1	SEC23_CANAL	SEC31_CANAL
biological_process	GO:0070863	positive regulation of protein exit from endoplasmic reticulum	2	4	0.5	0.981692	0.142365	1	1	SEC23_CANAL	SEC31_CANAL
biological_process	GO:2000045	regulation of G1/S transition of mitotic cell cycle	2	2	1	0.994288	0.0290651	1	1	CG11_CANAL	CG13_CANAL
biological_process	GO:0009249	protein lipoylation	2	5	0.4	0.960128	0.210694	1	1	Q5AI42_CANAL	A0A1D8PT49_CANAL
biological_process	GO:0006417	regulation of translation	2	9	0.222222	0.97433	0.0449781	1	1	DHH1_CANAL	A0A1D8PLT5_CANAL
biological_process	GO:0006488	dolichol-linked oligosaccharide biosynthetic process	2	13	0.153846	0.599334	0.689371	1	1	ALG13_CANAL	A0A1D8PTC1_CANAL
biological_process	GO:0009303	rRNA transcription	2	5	0.4	0.94456	0.129876	1	1	A0A1D8PM79_CANAL	A0A1D8PHX3_CANAL
biological_process	GO:0000350	generation of catalytic spliceosome for second transesterification step	2	7	0.285714	0.893616	0.351204	1	1	A0A1D8PS92_CANAL	A0A1D8PFH7_CANAL
biological_process	GO:0033617	mitochondrial cytochrome c oxidase assembly	2	23	0.0869565	0.209075	0.928738	1	1	A0A1D8PIZ2_CANAL	A0A1D8PTX2_CANAL
biological_process	GO:0045292	mRNA cis splicing, via spliceosome	2	12	0.166667	0.700724	0.545606	1	1	A0A1D8PNL9_CANAL	A0A1D8PFI2_CANAL
biological_process	GO:0009372	quorum sensing	2	3	0.666667	0.994738	0.0803369	1	1	CZF1_CANAL	TUP1_CANAL
biological_process	GO:0036187	cell growth mode switching, budding to filamentous	2	13	0.153846	0.599334	0.689371	1	1	GDA1_CANAL	Q5AKW2_CANAL
biological_process	GO:0006995	cellular response to nitrogen starvation	2	10	0.2	0.702814	0.595654	1	1	A0A1D8PJF2_CANAL	A0A1D8PI64_CANAL
biological_process	GO:0006878	cellular copper ion homeostasis	2	14	0.142857	0.549044	0.729107	1	1	A0A1D8PTX2_CANAL	A0A1D8PJG1_CANAL
biological_process	GO:0008608	attachment of spindle microtubules to kinetochore	2	8	0.25	0.890966	0.229026	1	1	IPL1_CANAL	Q5AMH1_CANAL
biological_process	GO:0042254	ribosome biogenesis	2	14	0.142857	0.0846481	0.939373	1	1	A0A1D8PSP5_CANAL	A0A1D8PFH2_CANAL
biological_process	GO:0003333	amino acid transmembrane transport	2	29	0.0689655	0.440303	0.720351	1	1	GAP5_CANAL	A0A1D8PKB2_CANAL
biological_process	GO:0071931	positive regulation of transcription involved in G1/S transition of mitotic cell cycle	2	5	0.4	0.960128	0.210694	1	1	A0A1D8PCM9_CANAL	A0A1D8PJV0_CANAL
biological_process	GO:0007186	G protein-coupled receptor signaling pathway	2	5	0.4	0.970935	0.108476	1	1	A0A1D8PH43_CANAL	A0A1D8PTB4_CANAL
biological_process	GO:0032995	regulation of fungal-type cell wall biogenesis	2	3	0.666667	0.994738	0.0803369	1	1	A0A1D8PE53_CANAL	A0A1D8PK79_CANAL
biological_process	GO:0009651	response to salt stress	2	5	0.4	0.930429	0.281256	1	1	A0A1D8PJ75_CANAL	A0A1D8PQP1_CANAL
biological_process	GO:0031589	cell-substrate adhesion	2	5	0.4	0.879977	0.198023	1	1	PMT1_CANAL	A0A1D8PTB4_CANAL
biological_process	GO:0008299	isoprenoid biosynthetic process	2	5	0.4	0.332079	0.868508	1	1	A0A1D8PRR4_CANAL	A0A1D8PNS6_CANAL
biological_process	GO:2000221	negative regulation of pseudohyphal growth	2	4	0.5	0.981692	0.142365	1	1	A0A1D8PIK2_CANAL	Q5ALV0_CANAL
biological_process	GO:0006635	fatty acid beta-oxidation	2	13	0.153846	0.369991	0.847393	1	1	PEX5_CANAL	A0A1D8PRN3_CANAL
biological_process	GO:0048478	replication fork protection	2	4	0.5	0.981692	0.142365	1	1	CCR4_CANAL	A0A1D8PP50_CANAL
biological_process	GO:0007089	traversing start control point of mitotic cell cycle	2	3	0.666667	0.994738	0.0803369	1	1	CCR4_CANAL	A0A1D8PDA6_CANAL
biological_process	GO:0071468	cellular response to acidic pH	2	4	0.5	0.960128	0.210694	1	1	CRZ2_CANAL	CRZ1_CANAL
biological_process	GO:0030682	mitigation of host defenses by symbiont	2	3	0.666667	0.981692	0.142365	1	1	MNT2_CANAL	TUP1_CANAL
biological_process	GO:0000086	G2/M transition of mitotic cell cycle	2	8	0.25	0.94456	0.129876	1	1	CG21_CANAL	A0A1D8PRF5_CANAL
biological_process	GO:0006038	cell wall chitin biosynthetic process	2	6	0.333333	0.851031	0.418616	1	1	A0A1D8PJ29_CANAL	A0A1D8PK97_CANAL
biological_process	GO:2000220	regulation of pseudohyphal growth	2	2	1	0.997564	0.0204882	1	1	MCM1_CANAL	CPH1_CANAL
biological_process	GO:0006893	Golgi to plasma membrane transport	2	11	0.181818	0.489713	0.735015	1	1	A0A1D8PMI1_CANAL	A0A1D8PNB6_CANAL
biological_process	GO:0036086	positive regulation of transcription from RNA polymerase II promoter in response to iron ion starvation	2	2	1	1	0.030287	1	1	AFT2_CANAL	A0A1D8PFM7_CANAL
biological_process	GO:0030968	endoplasmic reticulum unfolded protein response	2	10	0.2	0.896026	0.257104	1	1	A0A1D8PNE9_CANAL	A0A1D8PGK8_CANAL
biological_process	GO:0000183	rDNA heterochromatin assembly	2	11	0.181818	0.700724	0.545606	1	1	A0A1D8PNK6_CANAL	A0A1D8PTJ0_CANAL
biological_process	GO:0044878	mitotic cytokinesis checkpoint signaling	2	2	1	1	0.030287	1	1	DBF2_CANAL	CDC14_CANAL
biological_process	GO:0010971	positive regulation of G2/M transition of mitotic cell cycle	2	5	0.4	0.960128	0.210694	1	1	DBF2_CANAL	A0A1D8PM39_CANAL
biological_process	GO:1902846	positive regulation of mitotic spindle elongation	2	2	1	1	0.030287	1	1	DBF2_CANAL	CDC14_CANAL
biological_process	GO:0000747	conjugation with cellular fusion	2	5	0.4	0.93502	0.118843	1	1	Q59WR6_CANAL	A0A1D8PLB6_CANAL
biological_process	GO:0009134	nucleoside diphosphate catabolic process	2	2	1	1	0.030287	1	1	GDA1_CANAL	Q5A1A4_CANAL
biological_process	GO:0000055	ribosomal large subunit export from nucleus	2	13	0.153846	0.549044	0.729107	1	1	A0A1D8PSD9_CANAL	A0A1D8PCR9_CANAL
biological_process	GO:0006369	termination of RNA polymerase II transcription	2	10	0.2	0.650848	0.644955	1	1	A0A1D8PN05_CANAL	A0A1D8PHH9_CANAL
biological_process	GO:0008033	tRNA processing	2	19	0.105263	0.0737558	0.961188	1	1	A0A1D8PME6_CANAL	A0A1D8PTG5_CANAL
biological_process	GO:0055085	transmembrane transport	2	27	0.0740741	0.00375491	0.9979	0.566	1	PNS1_CANAL	A0A1D8PNM6_CANAL
biological_process	GO:0008380	RNA splicing	2	12	0.166667	0.832523	0.234909	1	1	A0A1D8PIL7_CANAL	Q59Z67_CANAL
biological_process	GO:0000722	telomere maintenance via recombination	2	10	0.2	0.75428	0.541387	1	1	INO80_CANAL	A0A1D8PJD1_CANAL
biological_process	GO:0044396	actin cortical patch organization	2	11	0.181818	0.987366	0.0454241	1	1	SLA1_CANAL	PAN1_CANAL
biological_process	GO:0042594	response to starvation	2	3	0.666667	0.982439	0.0259432	1	1	MNL1_CANAL	A0A1D8PEH3_CANAL
biological_process	GO:0007031	peroxisome organization	2	11	0.181818	0.994641	0.0155382	1	1	A0A1D8PRN3_CANAL	A0A1D8PEX2_CANAL
biological_process	GO:0008298	intracellular mRNA localization	2	8	0.25	0.851031	0.418616	1	1	A0A1D8PMK3_CANAL	A0A1D8PJB0_CANAL
biological_process	GO:0032007	negative regulation of TOR signaling	2	5	0.4	0.98155	0.0795994	1	1	A0A1D8PMB6_CANAL	A0A1D8PHK4_CANAL
biological_process	GO:0010506	regulation of autophagy	2	4	0.5	0.614828	0.630009	1	1	Q5A2C3_CANAL	A0A1D8PI64_CANAL
biological_process	GO:0038202	TORC1 signaling	2	4	0.5	0.984499	0.0599491	1	1	Q5AAN6_CANAL	A0A1D8PHX3_CANAL
biological_process	GO:1902975	mitotic DNA replication initiation	2	6	0.333333	0.930429	0.281256	1	1	A0A1D8PHW4_CANAL	A0A1D8PFE6_CANAL
biological_process	GO:0000480	endonucleolytic cleavage in 5'-ETS of tricistronic rRNA transcript (SSU-rRNA, 5.8S rRNA, LSU-rRNA)	2	16	0.125	0.454394	0.795706	1	1	Q5APD0_CANAL	A0A1D8PJ43_CANAL
biological_process	GO:0000472	endonucleolytic cleavage to generate mature 5'-end of SSU-rRNA from (SSU-rRNA, 5.8S rRNA, LSU-rRNA)	2	17	0.117647	0.410797	0.82324	1	1	Q5APD0_CANAL	A0A1D8PJ43_CANAL
biological_process	GO:0006012	galactose metabolic process	2	3	0.666667	0.964591	0.148969	1	1	CPH1_CANAL	Q5AND6_CANAL
biological_process	GO:0046020	negative regulation of transcription from RNA polymerase II promoter by pheromones	2	2	1	1	0.030287	1	1	CPH1_CANAL	A0A1D8PPV9_CANAL
biological_process	GO:0007329	positive regulation of transcription from RNA polymerase II promoter by pheromones	2	4	0.5	0.981692	0.142365	1	1	CPH1_CANAL	TEC1_CANAL
biological_process	GO:0031579	membrane raft organization	2	2	1	0.979512	0.106384	1	1	MOB2_CANAL	CBK1_CANAL
biological_process	GO:0070651	nonfunctional rRNA decay	2	12	0.166667	0.650848	0.644955	1	1	A0A1D8PHQ0_CANAL	A0A1D8PLY1_CANAL
biological_process	GO:0046084	adenine biosynthetic process	2	7	0.285714	0.851031	0.418616	1	1	A0A1D8PP44_CANAL	Q5A683_CANAL
biological_process	GO:0034316	negative regulation of Arp2/3 complex-mediated actin nucleation	2	4	0.5	0.981692	0.142365	1	1	SLA1_CANAL	A0A1D8PRF5_CANAL
biological_process	GO:0000160	phosphorelay signal transduction system	2	5	0.4	0.893616	0.351204	1	1	SSK1_CANAL	A0A1D8PQP3_CANAL
biological_process	GO:0070086	ubiquitin-dependent endocytosis	2	8	0.25	0.851031	0.418616	1	1	Q59LZ4_CANAL	A0A1D8PGG1_CANAL
biological_process	GO:0060211	regulation of nuclear-transcribed mRNA poly(A) tail shortening	2	2	1	0.994738	0.0803369	1	1	PABP_CANAL	Q5ANK2_CANAL
biological_process	GO:0032456	endocytic recycling	2	6	0.333333	0.851031	0.418616	1	1	Q5ADR3_CANAL	A0A1D8PI64_CANAL
biological_process	GO:0032508	DNA duplex unwinding	2	5	0.4	0.99478	0.0232116	1	1	A0A1D8PJD1_CANAL	A0A1D8PRM6_CANAL
biological_process	GO:0006384	transcription initiation from RNA polymerase III promoter	2	11	0.181818	0.650848	0.644955	1	1	TF3B_CANAL	Q59LT9_CANAL
biological_process	GO:0000710	meiotic mismatch repair	2	8	0.25	0.851031	0.418616	1	1	MSH3_CANAL	A0A1D8PII6_CANAL
biological_process	GO:0006298	mismatch repair	2	12	0.166667	0.500581	0.764443	1	1	MSH3_CANAL	A0A1D8PII6_CANAL
biological_process	GO:0030437	ascospore formation	2	7	0.285714	0.209075	0.928738	1	1	SET2_CANAL	A0A1D8PJG1_CANAL
biological_process	GO:0006353	DNA-templated transcription, termination	2	5	0.4	0.507042	0.677626	1	1	SET2_CANAL	A0A1D8PQN1_CANAL
biological_process	GO:0045324	late endosome to vacuole transport	2	10	0.2	0.7957	0.348142	1	1	BRO1_CANAL	A0A1D8PPK3_CANAL
biological_process	GO:0000245	spliceosomal complex assembly	2	8	0.25	0.919641	0.216269	1	1	A0A1D8PHP6_CANAL	A0A1D8PDS9_CANAL
biological_process	GO:0030488	tRNA methylation	2	17	0.117647	0.332079	0.868508	1	1	A0A1D8PLX4_CANAL	Q59UF6_CANAL
biological_process	GO:0032008	positive regulation of TOR signaling	2	6	0.333333	0.851031	0.418616	1	1	Q5AD30_CANAL	A0A1D8PI64_CANAL
biological_process	GO:0006352	DNA-templated transcription, initiation	2	7	0.285714	0.910997	0.146668	1	1	TF3B_CANAL	Q5A7B0_CANAL
biological_process	GO:0043087	regulation of GTPase activity	2	7	0.285714	0.829382	0.334035	1	1	Q5AMQ3_CANAL	A0A1D8PLJ2_CANAL
biological_process	GO:0006896	Golgi to vacuole transport	2	14	0.142857	0.549044	0.729107	1	1	A0A1D8PK25_CANAL	A0A1D8PNI0_CANAL
biological_process	GO:0031591	wybutosine biosynthetic process	2	4	0.5	0.981692	0.142365	1	1	Q59UF6_CANAL	A0A1D8PPU8_CANAL
biological_process	GO:0000724	double-strand break repair via homologous recombination	2	21	0.0952381	0.547785	0.614808	1	1	Q59NG2_CANAL	A0A1D8PFH9_CANAL
biological_process	GO:0006361	transcription initiation from RNA polymerase I promoter	2	9	0.222222	0.75428	0.541387	1	1	A0A1D8PQT8_CANAL	Q59LT9_CANAL
biological_process	GO:0010833	telomere maintenance via telomere lengthening	2	3	0.666667	0.783731	0.450956	1	1	TBF1_CANAL	A0A1D8PIK2_CANAL
biological_process	GO:0030154	cell differentiation	2	3	0.666667	0.618024	0.520379	1	1	RFG1_CANAL	A0A1D8PP44_CANAL
biological_process	GO:0055088	lipid homeostasis	2	15	0.133333	0.703105	0.510287	1	1	A0A1D8PKQ4_CANAL	A0A1D8PIA5_CANAL
biological_process	GO:0007096	regulation of exit from mitosis	2	5	0.4	0.920401	0.24572	1	1	CDC14_CANAL	Q59LD5_CANAL
biological_process	GO:1904262	negative regulation of TORC1 signaling	2	5	0.4	0.960128	0.210694	1	1	ATM_CANAL	A0A1D8PQP1_CANAL
biological_process	GO:0006869	lipid transport	2	5	0.4	0.770696	0.378951	1	1	ATG9_CANAL	A0A1D8PNV5_CANAL
biological_process	GO:0044407	single-species biofilm formation in or on host organism	2	5	0.4	0.960128	0.210694	1	1	A0A1D8PJZ6_CANAL	A0A1D8PE53_CANAL
biological_process	GO:0000282	cellular bud site selection	2	10	0.2	0.984499	0.0599491	1	1	A0A1D8PFH4_CANAL	A0A1D8PS50_CANAL
biological_process	GO:0046210	nitric oxide catabolic process	2	5	0.4	0.960128	0.210694	1	1	A0A1D8PGM5_CANAL	A0A1D8PD58_CANAL
biological_process	GO:2000601	positive regulation of Arp2/3 complex-mediated actin nucleation	2	5	0.4	0.960128	0.210694	1	1	MYO5_CANAL	A0A1D8PU03_CANAL
biological_process	GO:0030050	vesicle transport along actin filament	2	2	1	1	0.030287	1	1	MYO5_CANAL	Q5AKW2_CANAL
biological_process	GO:0006796	phosphate-containing compound metabolic process	2	10	0.2	0.794372	0.242787	1	1	A0A1D8PMD1_CANAL	A0A1D8PDA6_CANAL
biological_process	GO:0034501	protein localization to kinetochore	2	7	0.285714	0.893616	0.351204	1	1	CDC14_CANAL	A0A1D8PTW7_CANAL
biological_process	GO:0006303	double-strand break repair via nonhomologous end joining	2	7	0.285714	0.851031	0.418616	1	1	A0A1D8PCQ2_CANAL	A0A1D8PF81_CANAL
biological_process	GO:0007130	synaptonemal complex assembly	2	6	0.333333	0.893616	0.351204	1	1	A0A1D8PU88_CANAL	Q5A928_CANAL
biological_process	GO:0045048	protein insertion into ER membrane	2	5	0.4	0.979512	0.106384	1	1	GET2_CANAL	GET3_CANAL
biological_process	GO:0000001	mitochondrion inheritance	2	10	0.2	0.75428	0.541387	1	1	Q5A747_CANAL	A0A1D8PKC9_CANAL
biological_process	GO:0009164	nucleoside catabolic process	2	2	1	0.960128	0.210694	1	1	FHL1_CANAL	A0A1D8PQ57_CANAL
biological_process	GO:0009165	nucleotide biosynthetic process	2	2	1	0.0213213	0.990556	0.987	1	FHL1_CANAL	A0A1D8PQ57_CANAL
biological_process	GO:0036003	positive regulation of transcription from RNA polymerase II promoter in response to stress	2	5	0.4	0.996935	0.0155007	1	1	AP1_CANAL	Q5ACU9_CANAL
biological_process	GO:0030950	establishment or maintenance of actin cytoskeleton polarity	2	4	0.5	0.981692	0.142365	1	1	CBK1_CANAL	A0A1D8PHB1_CANAL
biological_process	GO:0001402	signal transduction involved in filamentous growth	2	7	0.285714	0.893616	0.351204	1	1	A0A1D8PMZ4_CANAL	A0A1D8PJG1_CANAL
biological_process	GO:0034473	U1 snRNA 3'-end processing	2	5	0.4	0.960128	0.210694	1	1	A0A1D8PM79_CANAL	A0A1D8PLY1_CANAL
biological_process	GO:0034476	U5 snRNA 3'-end processing	2	6	0.333333	0.930429	0.281256	1	1	A0A1D8PM79_CANAL	A0A1D8PLY1_CANAL
biological_process	GO:0006644	phospholipid metabolic process	2	9	0.222222	0.0531856	0.969751	1	1	A0A1D8PR41_CANAL	A0A1D8PGK8_CANAL
biological_process	GO:0006302	double-strand break repair	2	13	0.153846	0.662242	0.462276	1	1	A0A1D8PJD1_CANAL	A0A1D8PCJ9_CANAL
biological_process	GO:0048268	clathrin coat assembly	2	3	0.666667	0.994738	0.0803369	1	1	A0A1D8PRF5_CANAL	A0A1D8PL36_CANAL
biological_process	GO:0000467	exonucleolytic trimming to generate mature 3'-end of 5.8S rRNA from tricistronic rRNA transcript (SSU-rRNA, 5.8S rRNA, LSU-rRNA)	2	11	0.181818	0.702814	0.595654	1	1	A0A1D8PHQ0_CANAL	A0A1D8PLY1_CANAL
biological_process	GO:0015937	coenzyme A biosynthetic process	2	6	0.333333	0.930429	0.281256	1	1	A0A1D8PQ17_CANAL	A0A1D8PKD2_CANAL
biological_process	GO:0006895	Golgi to endosome transport	2	7	0.285714	0.851031	0.418616	1	1	A0A1D8PPS9_CANAL	A0A1D8PGL6_CANAL
biological_process	GO:0006898	receptor-mediated endocytosis	2	3	0.666667	0.984499	0.0599491	1	1	A0A1D8PPS9_CANAL	A0A1D8PE70_CANAL
biological_process	GO:0006003	fructose 2,6-bisphosphate metabolic process	2	4	0.5	0.981692	0.142365	1	1	A0A1D8PEF9_CANAL	A0A1D8PCP7_CANAL
biological_process	GO:0006000	fructose metabolic process	2	4	0.5	0.981692	0.142365	1	1	A0A1D8PEF9_CANAL	A0A1D8PCP7_CANAL
biological_process	GO:0006289	nucleotide-excision repair	2	16	0.125	0.717801	0.440673	1	1	A0A1D8PGE3_CANAL	A0A1D8PN00_CANAL
biological_process	GO:0036228	protein localization to nuclear inner membrane	2	4	0.5	0.981692	0.142365	1	1	A0A1D8PS91_CANAL	A0A1D8PFQ0_CANAL
biological_process	GO:0015074	DNA integration	2	6	0.333333	0.930429	0.281256	1	1	A0A1D8PLS1_CANAL	A0A1D8PI28_CANAL
biological_process	GO:0000290	deadenylation-dependent decapping of nuclear-transcribed mRNA	2	9	0.222222	0.804116	0.482254	1	1	A0A1D8PM60_CANAL	A0A1D8PTG5_CANAL
biological_process	GO:0045947	negative regulation of translational initiation	2	3	0.666667	0.981692	0.142365	1	1	A0A1D8PM60_CANAL	Q5AAR2_CANAL
biological_process	GO:0007032	endosome organization	2	8	0.25	0.702814	0.595654	1	1	A0A1D8PRW9_CANAL	A0A1D8PJG8_CANAL
biological_process	GO:0006636	unsaturated fatty acid biosynthetic process	2	4	0.5	0.960128	0.210694	1	1	A0A1D8PHT9_CANAL	Q5A747_CANAL
biological_process	GO:0071038	nuclear polyadenylation-dependent tRNA catabolic process	2	10	0.2	0.75428	0.541387	1	1	A0A1D8PHQ0_CANAL	A0A1D8PLY1_CANAL
biological_process	GO:0070478	nuclear-transcribed mRNA catabolic process, 3'-5' exonucleolytic nonsense-mediated decay	2	10	0.2	0.75428	0.541387	1	1	A0A1D8PHQ0_CANAL	A0A1D8PLY1_CANAL
biological_process	GO:0034427	nuclear-transcribed mRNA catabolic process, exonucleolytic, 3'-5'	2	9	0.222222	0.650848	0.644955	1	1	A0A1D8PHQ0_CANAL	A0A1D8PLY1_CANAL
biological_process	GO:1903778	protein localization to vacuolar membrane	2	2	1	0.981692	0.142365	1	1	Q59PA6_CANAL	A0A1D8PI64_CANAL
biological_process	GO:0019740	nitrogen utilization	2	6	0.333333	0.99478	0.0232116	1	1	A0A1D8PEG7_CANAL	A0A1D8PJF2_CANAL
biological_process	GO:0006405	RNA export from nucleus	2	6	0.333333	0.954459	0.0905292	1	1	A0A1D8PKH4_CANAL	A0A1D8PQE5_CANAL
biological_process	GO:0000972	transcription-dependent tethering of RNA polymerase II gene DNA at nuclear periphery	2	4	0.5	0.964591	0.148969	1	1	A0A1D8PQE5_CANAL	Q5AAV6_CANAL
biological_process	GO:0051641	cellular localization	2	4	0.5	0.983153	0.022111	1	1	A0A1D8PN92_CANAL	A0A1D8PRB9_CANAL
biological_process	GO:0034975	protein folding in endoplasmic reticulum	2	3	0.666667	0.994738	0.0803369	1	1	A0A1D8PIB5_CANAL	A0A1D8PER8_CANAL
biological_process	GO:0034488	basic amino acid transmembrane export from vacuole	2	2	1	1	0.030287	1	1	A0A1D8PJT9_CANAL	A0A1D8PM72_CANAL
biological_process	GO:0007188	adenylate cyclase-modulating G protein-coupled receptor signaling pathway	2	3	0.666667	0.930429	0.281256	1	1	Q5A3J9_CANAL	A0A1D8PJG1_CANAL
biological_process	GO:0045332	phospholipid translocation	2	10	0.2	0.650848	0.644955	1	1	Q5ADR3_CANAL	A0A1D8PMY6_CANAL
biological_process	GO:0043928	exonucleolytic catabolism of deadenylated mRNA	2	6	0.333333	0.930429	0.281256	1	1	Q5A8L5_CANAL	A0A1D8PLY1_CANAL
biological_process	GO:0031146	SCF-dependent proteasomal ubiquitin-dependent protein catabolic process	2	11	0.181818	0.650848	0.644955	1	1	A0A1D8PDR1_CANAL	A0A1D8PDG3_CANAL
biological_process	GO:0045842	positive regulation of mitotic metaphase/anaphase transition	2	10	0.2	0.702814	0.595654	1	1	A0A1D8PPK6_CANAL	A0A1D8PRX3_CANAL
biological_process	GO:1900373	positive regulation of purine nucleotide biosynthetic process	2	2	1	1	0.030287	1	1	A0A1D8PP44_CANAL	Q5A683_CANAL
biological_process	GO:0045471	response to ethanol	2	2	1	1	0.030287	1	1	A0A1D8PGM1_CANAL	Q5A747_CANAL
biological_process	GO:0048211	Golgi vesicle docking	2	3	0.666667	0.994738	0.0803369	1	1	A0A1D8PFN6_CANAL	A0A1D8PMA2_CANAL
biological_process	GO:0061408	positive regulation of transcription from RNA polymerase II promoter in response to heat stress	2	4	0.5	0.981692	0.142365	1	1	A0A1D8PQP1_CANAL	A0A1D8PNP8_CANAL
biological_process	GO:0000973	posttranscriptional tethering of RNA polymerase II gene DNA at nuclear periphery	2	5	0.4	0.960128	0.210694	1	1	A0A1D8PKH4_CANAL	A0A1D8PQE5_CANAL
biological_process	GO:0006882	cellular zinc ion homeostasis	2	6	0.333333	0.851031	0.418616	1	1	A0A1D8PPK1_CANAL	A0A1D8PM73_CANAL
biological_process	GO:1900191	negative regulation of single-species biofilm formation	2	2	1	1	0.030287	1	1	Q5ANG4_CANAL	Q5ADP3_CANAL
biological_process	GO:2001020	regulation of response to DNA damage stimulus	2	3	0.666667	0.957146	0.141287	1	1	A0A1D8PTM3_CANAL	Q5ADP3_CANAL
biological_process	GO:0042546	cell wall biogenesis	2	3	0.666667	0.909423	0.143126	1	1	A0A1D8PE53_CANAL	A0A1D8PK79_CANAL
biological_process	GO:0046785	microtubule polymerization	2	2	1	0.979512	0.106384	1	1	A0A1D8PIP2_CANAL	A0A1D8PTZ8_CANAL
biological_process	GO:0071444	cellular response to pheromone	2	7	0.285714	0.951392	0.105967	1	1	A0A1D8PTB4_CANAL	A0A1D8PQ19_CANAL
biological_process	GO:2000219	positive regulation of invasive growth in response to glucose limitation	2	2	1	1	0.030287	1	1	A0A1D8PP04_CANAL	A0A1D8PNP8_CANAL
biological_process	GO:0032880	regulation of protein localization	2	3	0.666667	0.847458	0.292675	1	1	A0A1D8PE85_CANAL	A0A1D8PJG8_CANAL
biological_process	GO:2000815	regulation of mRNA stability involved in response to oxidative stress	2	3	0.666667	0.994738	0.0803369	1	1	A0A1D8PRZ6_CANAL	A0A1D8PKD8_CANAL
biological_process	GO:0033260	nuclear DNA replication	2	2	1	0.957796	0.0992692	1	1	A0A1D8PMG3_CANAL	A0A1D8PQQ6_CANAL
biological_process	GO:0009437	carnitine metabolic process	2	3	0.666667	0.893616	0.351204	1	1	Q59MQ8_CANAL	Q59T80_CANAL
biological_process	GO:0000493	box H/ACA snoRNP assembly	2	2	1	1	0.030287	1	1	A0A1D8PSP5_CANAL	Q59MG2_CANAL
biological_process	GO:0001522	pseudouridine synthesis	2	2	1	0.822562	0.400666	1	1	A0A1D8PSP5_CANAL	A0A1D8PIN8_CANAL
biological_process	GO:0070096	mitochondrial outer membrane translocase complex assembly	1	4	0.25	0.857635	0.53493	1	1	MMM1_CANAL
biological_process	GO:1990456	mitochondrion-endoplasmic reticulum membrane tethering	1	5	0.2	0.789306	0.61599	1	1	MMM1_CANAL
biological_process	GO:0060257	negative regulation of flocculation	1	5	0.2	0.789306	0.61599	1	1	SFL2_CANAL
biological_process	GO:0043709	cell adhesion involved in single-species biofilm formation	1	18	0.0555556	0.817123	0.302198	1	1	A0A1D8PHU1_CANAL
biological_process	GO:0042149	cellular response to glucose starvation	1	11	0.0909091	0.355045	0.899652	1	1	A0A1D8PGA2_CANAL
biological_process	GO:0032185	septin cytoskeleton organization	1	3	0.333333	0.840087	0.342157	1	1	A0A1D8PL12_CANAL
biological_process	GO:0001403	invasive growth in response to glucose limitation	1	11	0.0909091	0.822562	0.400666	1	1	A0A1D8PJG1_CANAL
biological_process	GO:0010106	cellular response to iron ion starvation	1	7	0.142857	0.970935	0.108476	1	1	PACC_CANAL
biological_process	GO:0044416	induction by symbiont of host defense response	1	19	0.0526316	0.113093	0.978417	1	1	PACC_CANAL
biological_process	GO:0002666	positive regulation of T cell tolerance induction	1	1	1	1	0.174129	1	1	PACC_CANAL
biological_process	GO:0000413	protein peptidyl-prolyl isomerization	1	7	0.142857	0.648796	0.738225	1	1	A0A1D8PJ59_CANAL
biological_process	GO:0036297	interstrand cross-link repair	1	8	0.125	0.404346	0.878427	1	1	A0A1D8PCQ2_CANAL
biological_process	GO:0000028	ribosomal small subunit assembly	1	15	0.0666667	0.17676	0.961581	1	1	A0A1D8PU03_CANAL
biological_process	GO:0030150	protein import into mitochondrial matrix	1	18	0.0555556	0.152607	0.968298	1	1	TIM14_CANAL
biological_process	GO:0061163	endoplasmic reticulum polarization	1	2	0.5	0.969713	0.317972	1	1	DBF2_CANAL
biological_process	GO:0071902	positive regulation of protein serine/threonine kinase activity	1	6	0.166667	0.718744	0.682936	1	1	Q5A2C3_CANAL
biological_process	GO:0097271	protein localization to bud neck	1	5	0.2	0.789306	0.61599	1	1	BUD4_CANAL
biological_process	GO:0000921	septin ring assembly	1	7	0.142857	0.648796	0.738225	1	1	GIN4_CANAL
biological_process	GO:0006310	DNA recombination	1	15	0.0666667	0.453933	0.654663	1	1	A0A1D8PF81_CANAL
biological_process	GO:0006260	DNA replication	1	16	0.0625	0.361097	0.731841	1	1	A0A1D8PRM6_CANAL
biological_process	GO:0097308	cellular response to farnesol	1	3	0.333333	0.919663	0.436789	1	1	TUP1_CANAL
biological_process	GO:0030865	cortical cytoskeleton organization	1	4	0.25	0.984806	0.0373761	1	1	RHO1_CANAL
biological_process	GO:1900240	negative regulation of phenotypic switching	1	2	0.5	0.969713	0.317972	1	1	RHO1_CANAL
biological_process	GO:0032956	regulation of actin cytoskeleton organization	1	8	0.125	0.855436	0.251724	1	1	RHO1_CANAL
biological_process	GO:0008360	regulation of cell shape	1	6	0.166667	0.822562	0.400666	1	1	RHO1_CANAL
biological_process	GO:0007266	Rho protein signal transduction	1	5	0.2	0.920401	0.24572	1	1	RHO1_CANAL
biological_process	GO:0000395	mRNA 5'-splice site recognition	1	3	0.333333	0.919663	0.436789	1	1	A0A1D8PGF5_CANAL
biological_process	GO:0035269	protein O-linked mannosylation	1	13	0.0769231	0.310629	0.917175	1	1	PMT1_CANAL
biological_process	GO:0051568	histone H3-K4 methylation	1	8	0.125	0.549044	0.729107	1	1	Q5AA42_CANAL
biological_process	GO:0000165	MAPK cascade	1	5	0.2	0.572187	0.667921	1	1	A0A1D8PHG7_CANAL
biological_process	GO:0043408	regulation of MAPK cascade	1	3	0.333333	0.599334	0.689371	1	1	CLA4_CANAL
biological_process	GO:0034724	DNA replication-independent chromatin organization	1	1	1	0.920401	0.24572	1	1	SPT16_CANAL
biological_process	GO:0006261	DNA-dependent DNA replication	1	13	0.0769231	0.545066	0.565003	1	1	SPT16_CANAL
biological_process	GO:0006334	nucleosome assembly	1	12	0.0833333	0.489713	0.735015	1	1	SPT16_CANAL
biological_process	GO:0045899	positive regulation of RNA polymerase II transcription preinitiation complex assembly	1	8	0.125	0.581384	0.783883	1	1	SPT16_CANAL
biological_process	GO:0007063	regulation of sister chromatid cohesion	1	1	1	0.919663	0.436789	1	1	SPT16_CANAL
biological_process	GO:0016042	lipid catabolic process	1	22	0.0454545	0.0084818	0.997335	0.837	1	A0A1D8PH95_CANAL
biological_process	GO:0031648	protein destabilization	1	1	1	1	0.174129	1	1	SSN3_CANAL
biological_process	GO:1902969	mitotic DNA replication	1	3	0.333333	0.739496	0.469641	1	1	A0A1D8PS48_CANAL
biological_process	GO:0003400	regulation of COPII vesicle coating	1	3	0.333333	0.919663	0.436789	1	1	SEC23_CANAL
biological_process	GO:0061709	reticulophagy	1	5	0.2	0.789306	0.61599	1	1	SEC23_CANAL
biological_process	GO:0000466	maturation of 5.8S rRNA from tricistronic rRNA transcript (SSU-rRNA, 5.8S rRNA, LSU-rRNA)	1	11	0.0909091	0.148171	0.930986	1	1	A0A1D8PE47_CANAL
biological_process	GO:0060962	regulation of ribosomal protein gene transcription by RNA polymerase II	1	6	0.166667	0.989255	0.0551397	1	1	A0A1D8PGM4_CANAL
biological_process	GO:0001732	formation of cytoplasmic translation initiation complex	1	11	0.0909091	0.404346	0.878427	1	1	EIF3C_CANAL
biological_process	GO:0071852	fungal-type cell wall organization or biogenesis	1	8	0.125	0.957657	0.0623219	1	1	A0A1D8PS14_CANAL
biological_process	GO:0046354	mannan biosynthetic process	1	6	0.166667	0.581384	0.783883	1	1	MNN21_CANAL
biological_process	GO:0035268	protein mannosylation	1	6	0.166667	0.332079	0.868508	1	1	MNN21_CANAL
biological_process	GO:0034755	iron ion transmembrane transport	1	9	0.111111	0.404346	0.878427	1	1	A0A1D8PRX4_CANAL
biological_process	GO:0000196	cell wall integrity MAPK cascade	1	3	0.333333	0.857635	0.53493	1	1	A0A1D8PHG7_CANAL
biological_process	GO:0050850	positive regulation of calcium-mediated signaling	1	2	0.5	0.969713	0.317972	1	1	A0A1D8PHG7_CANAL
biological_process	GO:0015917	aminophospholipid transport	1	1	1	1	0.174129	1	1	MMM1_CANAL
biological_process	GO:0019674	NAD metabolic process	1	3	0.333333	0.404346	0.878427	1	1	A0A1D8PKE0_CANAL
biological_process	GO:0051017	actin filament bundle assembly	1	6	0.166667	0.458613	0.85272	1	1	A0A1D8PE85_CANAL
biological_process	GO:0000470	maturation of LSU-rRNA	1	17	0.0588235	0.235529	0.87917	1	1	A0A1D8PPJ1_CANAL
biological_process	GO:0000389	mRNA 3'-splice site recognition	1	3	0.333333	0.919663	0.436789	1	1	A0A1D8PFH7_CANAL
biological_process	GO:0033120	positive regulation of RNA splicing	1	2	0.5	0.994738	0.0803369	1	1	A0A1D8PTJ0_CANAL
biological_process	GO:0006413	translational initiation	1	12	0.0833333	0.235529	0.87917	1	1	EIF3C_CANAL
biological_process	GO:0006696	ergosterol biosynthetic process	1	24	0.0416667	0.143892	0.955641	1	1	Q5AG85_CANAL
biological_process	GO:0000045	autophagosome assembly	1	15	0.0666667	0.739663	0.446216	1	1	A0A1D8PFN6_CANAL
biological_process	GO:0044804	autophagy of nucleus	1	8	0.125	0.628463	0.58691	1	1	HSV2_CANAL
biological_process	GO:0006744	ubiquinone biosynthetic process	1	12	0.0833333	0.204294	0.953443	1	1	A0A1D8PRR4_CANAL
biological_process	GO:0018230	peptidyl-L-cysteine S-palmitoylation	1	6	0.166667	0.718744	0.682936	1	1	ERFB_CANAL
biological_process	GO:0034080	CENP-A containing chromatin assembly	1	3	0.333333	0.981692	0.142365	1	1	A0A1D8PP04_CANAL
biological_process	GO:0031507	heterochromatin assembly	1	6	0.166667	0.728963	0.408416	1	1	A0A1D8PM39_CANAL
biological_process	GO:0034982	mitochondrial protein processing	1	4	0.25	0.702814	0.595654	1	1	OMA1_CANAL
biological_process	GO:0007004	telomere maintenance via telomerase	1	7	0.142857	0.404346	0.878427	1	1	A0A1D8PJD1_CANAL
biological_process	GO:0031139	positive regulation of conjugation with cellular fusion	1	2	0.5	0.800972	0.371537	1	1	Q5A2C3_CANAL
biological_process	GO:0001934	positive regulation of protein phosphorylation	1	4	0.25	0.783731	0.450956	1	1	MOB2_CANAL
biological_process	GO:0072344	rescue of stalled ribosome	1	6	0.166667	0.718744	0.682936	1	1	A0A1D8PHX5_CANAL
biological_process	GO:1990116	ribosome-associated ubiquitin-dependent protein catabolic process	1	8	0.125	0.581384	0.783883	1	1	A0A1D8PHX5_CANAL
biological_process	GO:0071276	cellular response to cadmium ion	1	6	0.166667	0.648796	0.738225	1	1	AP1_CANAL
biological_process	GO:2000134	negative regulation of G1/S transition of mitotic cell cycle	1	4	0.25	0.718744	0.682936	1	1	Q5ANF0_CANAL
biological_process	GO:0007231	osmosensory signaling pathway	1	3	0.333333	0.458613	0.85272	1	1	A0A1D8PI07_CANAL
biological_process	GO:0008654	phospholipid biosynthetic process	1	8	0.125	0.152921	0.906983	1	1	A0A1D8PGK8_CANAL
biological_process	GO:0044206	UMP salvage	1	2	0.5	0.969713	0.317972	1	1	Q5ANN6_CANAL
biological_process	GO:1903424	fluoride transmembrane transport	1	1	1	1	0.174129	1	1	FEX1_CANAL
biological_process	GO:0016480	negative regulation of transcription by RNA polymerase III	1	4	0.25	0.857635	0.53493	1	1	Q5AL00_CANAL
biological_process	GO:0015986	ATP synthesis coupled proton transport	1	16	0.0625	0.152607	0.968298	1	1	Q59ZE0_CANAL
biological_process	GO:1990570	GDP-mannose transmembrane transport	1	1	1	1	0.174129	1	1	GMT_CANAL
biological_process	GO:0035694	mitochondrial protein catabolic process	1	1	1	1	0.174129	1	1	OMA1_CANAL
biological_process	GO:0033108	mitochondrial respiratory chain complex assembly	1	2	0.5	0.0484424	0.982978	1	1	OMA1_CANAL
biological_process	GO:0051603	proteolysis involved in cellular protein catabolic process	1	8	0.125	0.693691	0.376028	1	1	OMA1_CANAL
biological_process	GO:0051775	response to redox state	1	1	1	1	0.174129	1	1	OMA1_CANAL
biological_process	GO:0000076	DNA replication checkpoint signaling	1	6	0.166667	0.599334	0.689371	1	1	CCR4_CANAL
biological_process	GO:0006396	RNA processing	1	16	0.0625	0.405782	0.64579	1	1	A0A1D8PM79_CANAL
biological_process	GO:0043111	replication fork arrest	1	5	0.2	0.789306	0.61599	1	1	MSH3_CANAL
biological_process	GO:0043710	cell adhesion involved in multi-species biofilm formation	1	10	0.1	0.458613	0.85272	1	1	MNT2_CANAL
biological_process	GO:0007160	cell-matrix adhesion	1	4	0.25	0.857635	0.53493	1	1	MNT2_CANAL
biological_process	GO:0006057	mannoprotein biosynthetic process	1	2	0.5	0.742896	0.499419	1	1	MNT2_CANAL
biological_process	GO:0097502	mannosylation	1	8	0.125	0.283026	0.873499	1	1	MNT2_CANAL
biological_process	GO:0000281	mitotic cytokinesis	1	7	0.142857	0.885529	0.203606	1	1	A0A1D8PHB0_CANAL
biological_process	GO:0007097	nuclear migration	1	7	0.142857	0.614828	0.630009	1	1	Q5AKW2_CANAL
biological_process	GO:0000128	flocculation	1	4	0.25	0.648796	0.738225	1	1	SFL2_CANAL
biological_process	GO:1990961	xenobiotic detoxification by transmembrane export across the plasma membrane	1	30	0.0333333	0.0232186	0.996853	0.995	1	A0A1D8PCL5_CANAL
biological_process	GO:1900461	positive regulation of pseudohyphal growth by positive regulation of transcription from RNA polymerase II promoter	1	1	1	1	0.174129	1	1	MCM1_CANAL
biological_process	GO:0044257	cellular protein catabolic process	1	3	0.333333	0.734532	0.329027	1	1	A0A1D8PI74_CANAL
biological_process	GO:0006656	phosphatidylcholine biosynthetic process	1	9	0.111111	0.404346	0.878427	1	1	A0A1D8PQT6_CANAL
biological_process	GO:0019933	cAMP-mediated signaling	1	5	0.2	0.789306	0.61599	1	1	A0A1D8PJG1_CANAL
biological_process	GO:0071333	cellular response to glucose stimulus	1	3	0.333333	0.517746	0.821587	1	1	A0A1D8PJG1_CANAL
biological_process	GO:0007265	Ras protein signal transduction	1	5	0.2	0.894033	0.2043	1	1	RAS1_CANAL
biological_process	GO:0072334	UDP-galactose transmembrane transport	1	1	1	1	0.174129	1	1	HUT1_CANAL
biological_process	GO:0046854	phosphatidylinositol phosphate biosynthetic process	1	8	0.125	0.581384	0.783883	1	1	A0A1D8PGH4_CANAL
biological_process	GO:0006541	glutamine metabolic process	1	14	0.0714286	0.204294	0.953443	1	1	A0A1D8PDN2_CANAL
biological_process	GO:0052559	induction by symbiont of host immune response	1	4	0.25	0.857635	0.53493	1	1	A0A1D8PEG3_CANAL
biological_process	GO:0006490	oligosaccharide-lipid intermediate biosynthetic process	1	4	0.25	0.454394	0.795706	1	1	A0A1D8PTC1_CANAL
biological_process	GO:1990481	mRNA pseudouridine synthesis	1	4	0.25	0.857635	0.53493	1	1	PUS1_CANAL
biological_process	GO:0031120	snRNA pseudouridine synthesis	1	4	0.25	0.857635	0.53493	1	1	PUS1_CANAL
biological_process	GO:0016236	macroautophagy	1	8	0.125	0.728963	0.408416	1	1	A0A1D8PPK3_CANAL
biological_process	GO:2000250	negative regulation of actin cytoskeleton reorganization	1	1	1	1	0.174129	1	1	DBF2_CANAL
biological_process	GO:0032091	negative regulation of protein binding	1	2	0.5	0.919663	0.436789	1	1	DBF2_CANAL
biological_process	GO:1903473	positive regulation of mitotic actomyosin contractile ring contraction	1	2	0.5	0.969713	0.317972	1	1	DBF2_CANAL
biological_process	GO:1902854	positive regulation of nuclear migration during mitotic telophase	1	1	1	1	0.174129	1	1	DBF2_CANAL
biological_process	GO:1905758	positive regulation of primary cell septum biogenesis	1	1	1	1	0.174129	1	1	DBF2_CANAL
biological_process	GO:0031028	septation initiation signaling	1	2	0.5	0.891524	0.297186	1	1	DBF2_CANAL
biological_process	GO:0007117	budding cell bud growth	1	3	0.333333	0.970935	0.108476	1	1	A0A1D8PDH5_CANAL
biological_process	GO:0006370	7-methylguanosine mRNA capping	1	5	0.2	0.718744	0.682936	1	1	A0A1D8PME6_CANAL
biological_process	GO:0008152	metabolic process	1	3	0.333333	0.656345	0.377125	1	1	ENG1_CANAL
biological_process	GO:0030011	maintenance of cell polarity	1	9	0.111111	0.517746	0.821587	1	1	A0A1D8PS50_CANAL
biological_process	GO:0071042	nuclear polyadenylation-dependent mRNA catabolic process	1	4	0.25	0.857635	0.53493	1	1	A0A1D8PLY1_CANAL
biological_process	GO:0046475	glycerophospholipid catabolic process	1	8	0.125	0.581384	0.783883	1	1	A0A1D8PN71_CANAL
biological_process	GO:0042542	response to hydrogen peroxide	1	5	0.2	0.581384	0.783883	1	1	A0A1D8PQP1_CANAL
biological_process	GO:0006826	iron ion transport	1	21	0.047619	0.0237759	0.994842	0.997	1	Q5ACZ8_CANAL
biological_process	GO:0000132	establishment of mitotic spindle orientation	1	6	0.166667	0.718744	0.682936	1	1	Q5A880_CANAL
biological_process	GO:0047496	vesicle transport along microtubule	1	2	0.5	0.969713	0.317972	1	1	Q5A880_CANAL
biological_process	GO:0044774	mitotic DNA integrity checkpoint signaling	1	2	0.5	0.572187	0.667921	1	1	IPL1_CANAL
biological_process	GO:0042144	vacuole fusion, non-autophagic	1	13	0.0769231	0.332079	0.868508	1	1	A0A1D8PFN6_CANAL
biological_process	GO:1903097	regulation of CENP-A containing nucleosome assembly	1	1	1	1	0.174129	1	1	INO80_CANAL
biological_process	GO:0035065	regulation of histone acetylation	1	1	1	0.893616	0.351204	1	1	INO80_CANAL
biological_process	GO:0032006	regulation of TOR signaling	1	1	1	0.989861	0.0345914	1	1	INO80_CANAL
biological_process	GO:0051315	attachment of mitotic spindle microtubules to kinetochore	1	6	0.166667	0.702814	0.595654	1	1	NDC80_CANAL
biological_process	GO:0006497	protein lipidation	1	3	0.333333	0.0774346	0.970661	1	1	HSV2_CANAL
biological_process	GO:0045861	negative regulation of proteolysis	1	2	0.5	0.718744	0.682936	1	1	PMT1_CANAL
biological_process	GO:0009117	nucleotide metabolic process	1	4	0.25	0.00136547	0.99944	0.253	1	ISN1_CANAL
biological_process	GO:0045454	cell redox homeostasis	1	16	0.0625	0.204294	0.953443	1	1	A0A1D8PTX2_CANAL
biological_process	GO:0007120	axial cellular bud site selection	1	1	1	1	0.174129	1	1	BUD4_CANAL
biological_process	GO:0015976	carbon utilization	1	4	0.25	0.857635	0.53493	1	1	A0A1D8PNL1_CANAL
biological_process	GO:0006084	acetyl-CoA metabolic process	1	3	0.333333	0.204294	0.953443	1	1	Q59MQ8_CANAL
biological_process	GO:0010142	farnesyl diphosphate biosynthetic process, mevalonate pathway	1	3	0.333333	0.919663	0.436789	1	1	A0A1D8PRR4_CANAL
biological_process	GO:0006415	translational termination	1	6	0.166667	0.454394	0.795706	1	1	Q59YE8_CANAL
biological_process	GO:0000447	endonucleolytic cleavage in ITS1 to separate SSU-rRNA from 5.8S rRNA and LSU-rRNA from tricistronic rRNA transcript (SSU-rRNA, 5.8S rRNA, LSU-rRNA)	1	21	0.047619	0.0971039	0.982193	1	1	Q5APD0_CANAL
biological_process	GO:0019953	sexual reproduction	1	1	1	0.777569	0.319867	1	1	CPH1_CANAL
biological_process	GO:0019722	calcium-mediated signaling	1	4	0.25	0.702814	0.595654	1	1	CRZ1_CANAL
biological_process	GO:0071260	cellular response to mechanical stimulus	1	5	0.2	0.789306	0.61599	1	1	CRZ1_CANAL
biological_process	GO:0042981	regulation of apoptotic process	1	3	0.333333	0.718744	0.682936	1	1	CRZ1_CANAL
biological_process	GO:0062200	RAM/MOR signaling pathway	1	1	1	1	0.174129	1	1	MOB2_CANAL
biological_process	GO:2000100	regulation of establishment or maintenance of bipolar cell polarity regulating cell shape	1	2	0.5	0.919663	0.436789	1	1	MOB2_CANAL
biological_process	GO:0097316	cellular response to N-acetyl-D-glucosamine	1	7	0.142857	0.648796	0.738225	1	1	Q5ACU9_CANAL
biological_process	GO:0045827	negative regulation of isoprenoid metabolic process	1	2	0.5	0.919663	0.436789	1	1	TUP1_CANAL
biological_process	GO:0051228	mitotic spindle disassembly	1	3	0.333333	0.919663	0.436789	1	1	IPL1_CANAL
biological_process	GO:0072665	protein localization to vacuole	1	3	0.333333	0.92569	0.132964	1	1	Q5A5Q4_CANAL
biological_process	GO:0044805	late nucleophagy	1	6	0.166667	0.718744	0.682936	1	1	ATG9_CANAL
biological_process	GO:0034727	piecemeal microautophagy of the nucleus	1	14	0.0714286	0.500581	0.764443	1	1	ATG13_CANAL
biological_process	GO:0031119	tRNA pseudouridine synthesis	1	2	0.5	0.969713	0.317972	1	1	PUS1_CANAL
biological_process	GO:0034244	negative regulation of transcription elongation from RNA polymerase II promoter	1	1	1	1	0.174129	1	1	RFX2_CANAL
biological_process	GO:0010768	negative regulation of transcription from RNA polymerase II promoter in response to UV-induced DNA damage	1	1	1	1	0.174129	1	1	RFX2_CANAL
biological_process	GO:0045595	regulation of cell differentiation	1	2	0.5	0.930429	0.281256	1	1	EFH1_CANAL
biological_process	GO:0071963	establishment or maintenance of cell polarity regulating cell shape	1	5	0.2	0.851031	0.418616	1	1	MYO5_CANAL
biological_process	GO:0006627	protein processing involved in protein targeting to mitochondrion	1	7	0.142857	0.648796	0.738225	1	1	A0A1D8PTZ4_CANAL
biological_process	GO:0007029	endoplasmic reticulum organization	1	4	0.25	0.966343	0.0829648	1	1	SEC31_CANAL
biological_process	GO:0008361	regulation of cell size	1	2	0.5	0.857635	0.53493	1	1	Q5ANF0_CANAL
biological_process	GO:0006446	regulation of translational initiation	1	5	0.2	0.742896	0.499419	1	1	PABP_CANAL
biological_process	GO:0006616	SRP-dependent cotranslational protein targeting to membrane, translocation	1	7	0.142857	0.648796	0.738225	1	1	Q5A885_CANAL
biological_process	GO:0001897	cytolysis by symbiont of host cells	1	4	0.25	0.857635	0.53493	1	1	A0A1D8PEG3_CANAL
biological_process	GO:0016320	endoplasmic reticulum membrane fusion	1	3	0.333333	0.919663	0.436789	1	1	A0A1D8PRK4_CANAL
biological_process	GO:0006646	phosphatidylethanolamine biosynthetic process	1	7	0.142857	0.648796	0.738225	1	1	A0A1D8PQT6_CANAL
biological_process	GO:0000372	Group I intron splicing	1	2	0.5	0.969713	0.317972	1	1	A0A1D8PJ62_CANAL
biological_process	GO:0006264	mitochondrial DNA replication	1	3	0.333333	0.857635	0.53493	1	1	A0A1D8PPN3_CANAL
biological_process	GO:0006904	vesicle docking involved in exocytosis	1	8	0.125	0.581384	0.783883	1	1	Q5AH58_CANAL
biological_process	GO:1904983	glycine import into mitochondrion	1	1	1	1	0.174129	1	1	S2538_CANAL
biological_process	GO:0042789	mRNA transcription by RNA polymerase II	1	2	0.5	0.969713	0.317972	1	1	SPT6_CANAL
biological_process	GO:1900050	negative regulation of histone exchange	1	1	1	1	0.174129	1	1	SPT6_CANAL
biological_process	GO:0034728	nucleosome organization	1	2	0.5	0.853514	0.247784	1	1	SPT6_CANAL
biological_process	GO:0043090	amino acid import	1	2	0.5	0.930429	0.281256	1	1	STP2_CANAL
biological_process	GO:1903364	positive regulation of cellular protein catabolic process	1	3	0.333333	0.75428	0.541387	1	1	STP2_CANAL
biological_process	GO:0006386	termination of RNA polymerase III transcription	1	10	0.1	0.458613	0.85272	1	1	Q59LT9_CANAL
biological_process	GO:0042797	tRNA transcription by RNA polymerase III	1	10	0.1	0.458613	0.85272	1	1	Q59LT9_CANAL
biological_process	GO:0043570	maintenance of DNA repeat elements	1	3	0.333333	0.893616	0.351204	1	1	MSH3_CANAL
biological_process	GO:0051096	positive regulation of helicase activity	1	2	0.5	0.969713	0.317972	1	1	MSH3_CANAL
biological_process	GO:0007131	reciprocal meiotic recombination	1	15	0.0666667	0.322374	0.833667	1	1	MSH3_CANAL
biological_process	GO:0000735	removal of nonhomologous ends	1	2	0.5	0.857635	0.53493	1	1	MSH3_CANAL
biological_process	GO:0006354	DNA-templated transcription, elongation	1	2	0.5	0.712058	0.420017	1	1	SET2_CANAL
biological_process	GO:0060195	negative regulation of antisense RNA transcription	1	3	0.333333	0.919663	0.436789	1	1	SET2_CANAL
biological_process	GO:0071441	negative regulation of histone H3-K14 acetylation	1	2	0.5	0.969713	0.317972	1	1	SET2_CANAL
biological_process	GO:2000616	negative regulation of histone H3-K9 acetylation	1	1	1	1	0.174129	1	1	SET2_CANAL
biological_process	GO:0045128	negative regulation of reciprocal meiotic recombination	1	2	0.5	0.969713	0.317972	1	1	SET2_CANAL
biological_process	GO:0035066	positive regulation of histone acetylation	1	4	0.25	0.789306	0.61599	1	1	SET2_CANAL
biological_process	GO:0032511	late endosome to vacuole transport via multivesicular body sorting pathway	1	11	0.0909091	0.707325	0.482774	1	1	A0A1D8PM89_CANAL
biological_process	GO:2001209	positive regulation of transcription elongation from RNA polymerase I promoter	1	2	0.5	0.969713	0.317972	1	1	A0A1D8PQN1_CANAL
biological_process	GO:2000232	regulation of rRNA processing	1	4	0.25	0.857635	0.53493	1	1	A0A1D8PJ43_CANAL
biological_process	GO:0090262	regulation of transcription-coupled nucleotide-excision repair	1	2	0.5	0.969713	0.317972	1	1	A0A1D8PQN1_CANAL
biological_process	GO:0051664	nuclear pore localization	1	2	0.5	0.969713	0.317972	1	1	A0A1D8PQE5_CANAL
biological_process	GO:1904263	positive regulation of TORC1 signaling	1	4	0.25	0.857635	0.53493	1	1	A0A1D8PI64_CANAL
biological_process	GO:0043968	histone H2A acetylation	1	4	0.25	0.857635	0.53493	1	1	SWC4_CANAL
biological_process	GO:0097056	selenocysteinyl-tRNA(Sec) biosynthetic process	1	1	1	1	0.174129	1	1	SYSC_CANAL
biological_process	GO:0006434	seryl-tRNA aminoacylation	1	2	0.5	0.969713	0.317972	1	1	SYSC_CANAL
biological_process	GO:0061024	membrane organization	1	4	0.25	0.960086	0.0613335	1	1	A0A1D8PT61_CANAL
biological_process	GO:0000266	mitochondrial fission	1	5	0.2	0.718744	0.682936	1	1	A0A1D8PKC9_CANAL
biological_process	GO:0006998	nuclear envelope organization	1	4	0.25	0.517746	0.821587	1	1	A0A1D8PKQ4_CANAL
biological_process	GO:0043001	Golgi to plasma membrane protein transport	1	10	0.1	0.458613	0.85272	1	1	A0A1D8PFN6_CANAL
biological_process	GO:0006892	post-Golgi vesicle-mediated transport	1	6	0.166667	0.748276	0.394955	1	1	Q5ADR3_CANAL
biological_process	GO:0042791	5S class rRNA transcription by RNA polymerase III	1	3	0.333333	0.919663	0.436789	1	1	A0A1D8PJI4_CANAL
biological_process	GO:0031123	RNA 3'-end processing	1	2	0.5	0.818186	0.287942	1	1	RNA14_CANAL
biological_process	GO:0031144	proteasome localization	1	2	0.5	0.969713	0.317972	1	1	A0A1D8PMU8_CANAL
biological_process	GO:1902977	mitotic DNA replication preinitiation complex assembly	1	3	0.333333	0.919663	0.436789	1	1	A0A1D8PHD2_CANAL
biological_process	GO:0042138	meiotic DNA double-strand break formation	1	4	0.25	0.930429	0.281256	1	1	A0A1D8PQN1_CANAL
biological_process	GO:0051569	regulation of histone H3-K4 methylation	1	3	0.333333	0.857635	0.53493	1	1	A0A1D8PQN1_CANAL
biological_process	GO:0006873	cellular ion homeostasis	1	5	0.2	0.235703	0.831456	1	1	YPI2_CANAL
biological_process	GO:0005977	glycogen metabolic process	1	3	0.333333	0.957146	0.141287	1	1	YPI2_CANAL
biological_process	GO:0032515	negative regulation of phosphoprotein phosphatase activity	1	3	0.333333	0.789306	0.61599	1	1	YPI2_CANAL
biological_process	GO:1905183	negative regulation of protein serine/threonine phosphatase activity	1	3	0.333333	0.919663	0.436789	1	1	YPI2_CANAL
biological_process	GO:0032516	positive regulation of phosphoprotein phosphatase activity	1	2	0.5	0.969713	0.317972	1	1	YPI2_CANAL
biological_process	GO:1900180	regulation of protein localization to nucleus	1	1	1	0.789306	0.61599	1	1	YPI2_CANAL
biological_process	GO:0071562	nucleus-vacuole junction assembly	1	1	1	1	0.174129	1	1	VAC8_CANAL
biological_process	GO:0006749	glutathione metabolic process	1	16	0.0625	0.235686	0.916754	1	1	URE2_CANAL
biological_process	GO:0042128	nitrate assimilation	1	1	1	1	0.174129	1	1	URE2_CANAL
biological_process	GO:0006516	glycoprotein catabolic process	1	2	0.5	0.981692	0.142365	1	1	PNG1_CANAL
biological_process	GO:0006517	protein deglycosylation	1	3	0.333333	0.930429	0.281256	1	1	PNG1_CANAL
biological_process	GO:0009653	anatomical structure morphogenesis	1	1	1	0.955862	0.0745865	1	1	RFG1_CANAL
biological_process	GO:0031126	sno(s)RNA 3'-end processing	1	3	0.333333	0.549044	0.729107	1	1	A0A1D8PQN1_CANAL
biological_process	GO:0106035	protein maturation by [4Fe-4S] cluster transfer	1	7	0.142857	0.648796	0.738225	1	1	Q5ADN0_CANAL
biological_process	GO:0032220	plasma membrane fusion involved in cytogamy	1	2	0.5	0.969713	0.317972	1	1	Q59WR6_CANAL
biological_process	GO:0033683	nucleotide-excision repair, DNA incision	1	3	0.333333	0.893616	0.351204	1	1	A0A1D8PQH0_CANAL
biological_process	GO:0006513	protein monoubiquitination	1	10	0.1	0.355045	0.899652	1	1	A0A1D8PLC1_CANAL
biological_process	GO:0070509	calcium ion import	1	2	0.5	0.789306	0.61599	1	1	Q59WR6_CANAL
biological_process	GO:0001558	regulation of cell growth	1	3	0.333333	0.996935	0.0155007	1	1	GIN4_CANAL
biological_process	GO:0032889	regulation of vacuole fusion, non-autophagic	1	6	0.166667	0.718744	0.682936	1	1	Q5AI78_CANAL
biological_process	GO:0016572	histone phosphorylation	1	1	1	0.969713	0.317972	1	1	ATM_CANAL
biological_process	GO:0006688	glycosphingolipid biosynthetic process	1	9	0.111111	0.270893	0.931642	1	1	BMT4_CANAL
biological_process	GO:0051382	kinetochore assembly	1	6	0.166667	0.893616	0.351204	1	1	A0A1D8PDB7_CANAL
biological_process	GO:0000423	mitophagy	1	3	0.333333	0.919663	0.436789	1	1	ATG13_CANAL
biological_process	GO:0071257	cellular response to electrical stimulus	1	2	0.5	0.969713	0.317972	1	1	A0A1D8PS50_CANAL
biological_process	GO:0009652	thigmotropism	1	2	0.5	0.969713	0.317972	1	1	A0A1D8PS50_CANAL
biological_process	GO:0042026	protein refolding	1	15	0.0666667	0.235557	0.943585	1	1	HSP77_CANAL
biological_process	GO:0034620	cellular response to unfolded protein	1	7	0.142857	0.829382	0.334035	1	1	HSP77_CANAL
biological_process	GO:0051085	chaperone cofactor-dependent protein refolding	1	13	0.0769231	0.310629	0.917175	1	1	HSP77_CANAL
biological_process	GO:0043335	protein unfolding	1	4	0.25	0.857635	0.53493	1	1	Q59ZE6_CANAL
biological_process	GO:0031048	heterochromatin assembly by small RNA	1	4	0.25	0.857635	0.53493	1	1	A0A1D8PPU7_CANAL
biological_process	GO:0044652	adhesion of symbiont to host endothelial cell	1	1	1	1	0.174129	1	1	HWP1_CANAL
biological_process	GO:0044855	plasma membrane raft distribution	1	1	1	1	0.174129	1	1	MYO5_CANAL
biological_process	GO:0030838	positive regulation of actin filament polymerization	1	1	1	0.987366	0.0454241	1	1	MYO5_CANAL
biological_process	GO:0045143	homologous chromosome segregation	1	2	0.5	0.987366	0.0454241	1	1	IPL1_CANAL
biological_process	GO:0045144	meiotic sister chromatid segregation	1	3	0.333333	0.964591	0.148969	1	1	IPL1_CANAL
biological_process	GO:1901925	negative regulation of protein import into nucleus during spindle assembly checkpoint	1	1	1	1	0.174129	1	1	IPL1_CANAL
biological_process	GO:0032465	regulation of cytokinesis	1	2	0.5	0.840087	0.342157	1	1	IPL1_CANAL
biological_process	GO:0090266	regulation of mitotic cell cycle spindle assembly checkpoint	1	2	0.5	0.919663	0.436789	1	1	IPL1_CANAL
biological_process	GO:1901673	regulation of mitotic spindle assembly	1	1	1	1	0.174129	1	1	IPL1_CANAL
biological_process	GO:0000742	karyogamy involved in conjugation with cellular fusion	1	7	0.142857	0.648796	0.738225	1	1	A0A1D8PIB5_CANAL
biological_process	GO:0051097	negative regulation of helicase activity	1	3	0.333333	0.789306	0.61599	1	1	A0A1D8PHW4_CANAL
biological_process	GO:0006190	inosine salvage	1	1	1	1	0.174129	1	1	ISN1_CANAL
biological_process	GO:0071590	nicotinamide riboside biosynthetic process	1	1	1	1	0.174129	1	1	ISN1_CANAL
biological_process	GO:0071592	nicotinic acid riboside biosynthetic process	1	1	1	1	0.174129	1	1	ISN1_CANAL
biological_process	GO:0035853	chromosome passenger complex localization to spindle midzone	1	1	1	1	0.174129	1	1	CDC14_CANAL
biological_process	GO:1902406	mitotic actomyosin contractile ring maintenance	1	2	0.5	0.969713	0.317972	1	1	CDC14_CANAL
biological_process	GO:0032467	positive regulation of cytokinesis	1	1	1	0.893616	0.351204	1	1	CDC14_CANAL
biological_process	GO:0031536	positive regulation of exit from mitosis	1	1	1	1	0.174129	1	1	CDC14_CANAL
biological_process	GO:1903490	positive regulation of mitotic cytokinesis	1	2	0.5	0.893616	0.351204	1	1	CDC14_CANAL
biological_process	GO:0140429	positive regulation of mitotic sister chromatid biorientation	1	2	0.5	0.969713	0.317972	1	1	CDC14_CANAL
biological_process	GO:0031031	positive regulation of septation initiation signaling	1	3	0.333333	0.919663	0.436789	1	1	CDC14_CANAL
biological_process	GO:1902440	protein localization to mitotic spindle pole body	1	1	1	0.919663	0.436789	1	1	CDC14_CANAL
biological_process	GO:1904789	regulation of mitotic actomyosin contractile ring maintenance	1	1	1	1	0.174129	1	1	CDC14_CANAL
biological_process	GO:0043410	positive regulation of MAPK cascade	1	3	0.333333	0.789306	0.61599	1	1	Q5AD30_CANAL
biological_process	GO:0030474	spindle pole body duplication	1	4	0.25	0.789306	0.61599	1	1	Q5A5Q4_CANAL
biological_process	GO:0015819	lysine transport	1	1	1	1	0.174129	1	1	BTN1_CANAL
biological_process	GO:0010571	positive regulation of nuclear cell cycle DNA replication	1	2	0.5	0.969713	0.317972	1	1	Q5A5B4_CANAL
biological_process	GO:0048312	intracellular distribution of mitochondria	1	2	0.5	0.969713	0.317972	1	1	CLU_CANAL
biological_process	GO:0006620	posttranslational protein targeting to endoplasmic reticulum membrane	1	6	0.166667	0.235557	0.943585	1	1	GET3_CANAL
biological_process	GO:0055091	phospholipid homeostasis	1	3	0.333333	0.919663	0.436789	1	1	Q5A8L5_CANAL
biological_process	GO:0006297	nucleotide-excision repair, DNA gap filling	1	4	0.25	0.857635	0.53493	1	1	A0A1D8PTD0_CANAL
biological_process	GO:0090305	nucleic acid phosphodiester bond hydrolysis	1	3	0.333333	0.531819	0.581317	1	1	A0A1D8PJD1_CANAL
biological_process	GO:0016559	peroxisome fission	1	5	0.2	0.789306	0.61599	1	1	A0A1D8PKC9_CANAL
biological_process	GO:0006409	tRNA export from nucleus	1	5	0.2	0.581384	0.783883	1	1	A0A1D8PGM4_CANAL
biological_process	GO:0048024	regulation of mRNA splicing, via spliceosome	1	1	1	0.994738	0.0803369	1	1	BBP_CANAL
biological_process	GO:0050708	regulation of protein secretion	1	2	0.5	0.969713	0.317972	1	1	CBK1_CANAL
biological_process	GO:0034067	protein localization to Golgi apparatus	1	4	0.25	0.404346	0.878427	1	1	A0A1D8PE76_CANAL
biological_process	GO:0010525	regulation of transposition, RNA-mediated	1	2	0.5	0.919663	0.436789	1	1	A0A1D8PQH0_CANAL
biological_process	GO:0031053	primary miRNA processing	1	2	0.5	0.969713	0.317972	1	1	A0A1D8PM79_CANAL
biological_process	GO:0001731	formation of translation preinitiation complex	1	11	0.0909091	0.355045	0.899652	1	1	A0A1D8PM60_CANAL
biological_process	GO:0032049	cardiolipin biosynthetic process	1	4	0.25	0.857635	0.53493	1	1	A0A1D8PND1_CANAL
biological_process	GO:0032981	mitochondrial respiratory chain complex I assembly	1	15	0.0666667	0.235557	0.943585	1	1	A0A1D8PJ15_CANAL
biological_process	GO:0000465	exonucleolytic trimming to generate mature 5'-end of 5.8S rRNA from tricistronic rRNA transcript (SSU-rRNA, 5.8S rRNA, LSU-rRNA)	1	2	0.5	0.969713	0.317972	1	1	Q59V85_CANAL
biological_process	GO:0006562	proline catabolic process	1	1	1	0.981692	0.142365	1	1	A0A1D8PLL5_CANAL
biological_process	GO:0043708	cell adhesion involved in biofilm formation	1	1	1	0.921207	0.146486	1	1	Q5ANF0_CANAL
biological_process	GO:0007039	protein catabolic process in the vacuole	1	6	0.166667	0.718744	0.682936	1	1	A0A1D8PGA2_CANAL
biological_process	GO:0006287	base-excision repair, gap-filling	1	2	0.5	0.969713	0.317972	1	1	A0A1D8PTD0_CANAL
biological_process	GO:0045004	DNA replication proofreading	1	2	0.5	0.969713	0.317972	1	1	A0A1D8PTD0_CANAL
biological_process	GO:0006997	nucleus organization	1	2	0.5	0.917035	0.176894	1	1	Q5AKW2_CANAL
biological_process	GO:0046656	folic acid biosynthetic process	1	3	0.333333	0.919663	0.436789	1	1	A0A1D8PMB0_CANAL
biological_process	GO:0046654	tetrahydrofolate biosynthetic process	1	4	0.25	0.857635	0.53493	1	1	A0A1D8PMB0_CANAL
biological_process	GO:0065003	protein-containing complex assembly	1	6	0.166667	0.318581	0.73279	1	1	Q59ZE0_CANAL
biological_process	GO:0000244	spliceosomal tri-snRNP complex assembly	1	3	0.333333	0.919663	0.436789	1	1	A0A1D8PFI2_CANAL
biological_process	GO:0036164	cell-abiotic substrate adhesion	1	10	0.1	0.458613	0.85272	1	1	A0A1D8PHU1_CANAL
biological_process	GO:0007034	vacuolar transport	1	14	0.0714286	0.696196	0.408742	1	1	A0A1D8PJV5_CANAL
biological_process	GO:0045050	protein insertion into ER membrane by stop-transfer membrane-anchor sequence	1	1	1	1	0.174129	1	1	A0A1D8PR41_CANAL
biological_process	GO:0031124	mRNA 3'-end processing	1	4	0.25	0.900731	0.202769	1	1	A0A1D8PN05_CANAL
biological_process	GO:0006283	transcription-coupled nucleotide-excision repair	1	5	0.2	0.893616	0.351204	1	1	A0A1D8PTM3_CANAL
biological_process	GO:0018344	protein geranylgeranylation	1	5	0.2	0.789306	0.61599	1	1	A0A1D8PD57_CANAL
biological_process	GO:0018342	protein prenylation	1	3	0.333333	0.930429	0.281256	1	1	A0A1D8PLY3_CANAL
biological_process	GO:0006530	asparagine catabolic process	1	2	0.5	0.969713	0.317972	1	1	A0A1D8PHJ0_CANAL
biological_process	GO:0010606	positive regulation of cytoplasmic mRNA processing body assembly	1	1	1	1	0.174129	1	1	Q5ANK2_CANAL
biological_process	GO:0009612	response to mechanical stimulus	1	1	1	0.964591	0.148969	1	1	Q5ANK2_CANAL
biological_process	GO:0044255	cellular lipid metabolic process	1	9	0.111111	0.00698827	0.995805	0.772	1	A0A1D8PH95_CANAL
biological_process	GO:0006020	inositol metabolic process	1	3	0.333333	0.718744	0.682936	1	1	A0A1D8PE76_CANAL
biological_process	GO:1905786	positive regulation of anaphase-promoting complex-dependent catabolic process	1	3	0.333333	0.919663	0.436789	1	1	A0A1D8PPK6_CANAL
biological_process	GO:0007019	microtubule depolymerization	1	2	0.5	0.981692	0.142365	1	1	A0A1D8PKA4_CANAL
biological_process	GO:0006950	response to stress	1	1	1	0.989771	0.0134841	1	1	A0A1D8PQP3_CANAL
biological_process	GO:0009062	fatty acid catabolic process	1	10	0.1	0.207179	0.915005	1	1	A0A1D8PGH7_CANAL
biological_process	GO:0016925	protein sumoylation	1	8	0.125	0.581384	0.783883	1	1	A0A1D8PCK0_CANAL
biological_process	GO:0034517	ribophagy	1	3	0.333333	0.919663	0.436789	1	1	A0A1D8PQC8_CANAL
biological_process	GO:0006006	glucose metabolic process	1	4	0.25	0.770974	0.40904	1	1	A0A1D8PLL4_CANAL
biological_process	GO:0019432	triglyceride biosynthetic process	1	4	0.25	0.857635	0.53493	1	1	Q59SS8_CANAL
biological_process	GO:0032196	transposition	1	2	0.5	0.960128	0.210694	1	1	A0A1D8PLS1_CANAL
biological_process	GO:0006360	transcription by RNA polymerase I	1	5	0.2	0.662142	0.501331	1	1	A0A1D8PI64_CANAL
biological_process	GO:0042176	regulation of protein catabolic process	1	3	0.333333	0.614828	0.630009	1	1	A0A1D8PFL7_CANAL
biological_process	GO:0006875	cellular metal ion homeostasis	1	5	0.2	0.0550373	0.96978	1	1	A0A1D8PMD1_CANAL
biological_process	GO:0000479	endonucleolytic cleavage of tricistronic rRNA transcript (SSU-rRNA, 5.8S rRNA, LSU-rRNA)	1	3	0.333333	0.126501	0.962213	1	1	A0A1D8PJ43_CANAL
biological_process	GO:0006272	leading strand elongation	1	8	0.125	0.581384	0.783883	1	1	A0A1D8PTD0_CANAL
biological_process	GO:0071786	endoplasmic reticulum tubular network organization	1	5	0.2	0.718744	0.682936	1	1	A0A1D8PT61_CANAL
biological_process	GO:0016036	cellular response to phosphate starvation	1	2	0.5	0.969713	0.317972	1	1	A0A1D8PMD1_CANAL
biological_process	GO:0006817	phosphate ion transport	1	7	0.142857	0.517746	0.821587	1	1	A0A1D8PI64_CANAL
biological_process	GO:0033314	mitotic DNA replication checkpoint signaling	1	7	0.142857	0.648796	0.738225	1	1	A0A1D8PHD2_CANAL
biological_process	GO:0006363	termination of RNA polymerase I transcription	1	7	0.142857	0.648796	0.738225	1	1	Q59LT9_CANAL
biological_process	GO:0006362	transcription elongation from RNA polymerase I promoter	1	8	0.125	0.75428	0.541387	1	1	Q59LT9_CANAL
biological_process	GO:0034214	protein hexamerization	1	3	0.333333	0.919663	0.436789	1	1	A0A1D8PFE6_CANAL
biological_process	GO:0071051	polyadenylation-dependent snoRNA 3'-end processing	1	6	0.166667	0.718744	0.682936	1	1	A0A1D8PHQ0_CANAL
biological_process	GO:0000433	carbon catabolite repression of transcription from RNA polymerase II promoter by glucose	1	4	0.25	0.857635	0.53493	1	1	A0A1D8PNL1_CANAL
biological_process	GO:0009113	purine nucleobase biosynthetic process	1	4	0.25	0.650848	0.644955	1	1	Q5A683_CANAL
biological_process	GO:0030007	cellular potassium ion homeostasis	1	7	0.142857	0.648796	0.738225	1	1	A0A1D8PDU7_CANAL
biological_process	GO:0006633	fatty acid biosynthetic process	1	9	0.111111	0.312435	0.856108	1	1	A0A1D8PIM6_CANAL
biological_process	GO:0031990	mRNA export from nucleus in response to heat stress	1	2	0.5	0.994738	0.0803369	1	1	A0A1D8PMK3_CANAL
biological_process	GO:0034402	recruitment of 3'-end processing factors to RNA polymerase II holoenzyme complex	1	3	0.333333	0.857635	0.53493	1	1	A0A1D8PQN1_CANAL
biological_process	GO:0010513	positive regulation of phosphatidylinositol biosynthetic process	1	1	1	1	0.174129	1	1	Q59PA6_CANAL
biological_process	GO:0070911	global genome nucleotide-excision repair	1	2	0.5	0.969713	0.317972	1	1	A0A1D8PQN1_CANAL
biological_process	GO:0009411	response to UV	1	2	0.5	0.974417	0.0775218	1	1	A0A1D8PQH0_CANAL
biological_process	GO:0030026	cellular manganese ion homeostasis	1	8	0.125	0.581384	0.783883	1	1	Q5ACZ8_CANAL
biological_process	GO:0007189	adenylate cyclase-activating G protein-coupled receptor signaling pathway	1	2	0.5	0.857635	0.53493	1	1	A0A1D8PJG1_CANAL
biological_process	GO:0051304	chromosome separation	1	2	0.5	0.988284	0.0288075	1	1	A0A1D8PTW7_CANAL
biological_process	GO:0007062	sister chromatid cohesion	1	7	0.142857	0.917035	0.176894	1	1	A0A1D8PSI8_CANAL
biological_process	GO:0060249	anatomical structure homeostasis	1	1	1	0.92522	0.144564	1	1	A0A1D8PIK2_CANAL
biological_process	GO:0048254	snoRNA localization	1	2	0.5	0.969713	0.317972	1	1	A0A1D8PLM8_CANAL
biological_process	GO:0017196	N-terminal peptidyl-methionine acetylation	1	6	0.166667	0.718744	0.682936	1	1	A0A1D8PNA3_CANAL
biological_process	GO:0005976	polysaccharide metabolic process	1	1	1	0.95107	0.0879016	1	1	Q5AJ73_CANAL
biological_process	GO:0006379	mRNA cleavage	1	5	0.2	0.902664	0.225268	1	1	A0A1D8PHH9_CANAL
biological_process	GO:0010961	cellular magnesium ion homeostasis	1	2	0.5	0.969713	0.317972	1	1	A0A1D8PJF5_CANAL
biological_process	GO:0001881	receptor recycling	1	1	1	0.996067	0.039872	1	1	A0A1D8PRW9_CANAL
biological_process	GO:0009074	aromatic amino acid family catabolic process	1	4	0.25	0.404346	0.878427	1	1	A0A1D8PCY0_CANAL
biological_process	GO:0006654	phosphatidic acid biosynthetic process	1	10	0.1	0.458613	0.85272	1	1	A0A1D8PIA5_CANAL
biological_process	GO:0051056	regulation of small GTPase mediated signal transduction	1	1	1	0.941667	0.144053	1	1	A0A1D8PMB6_CANAL
biological_process	GO:0016024	CDP-diacylglycerol biosynthetic process	1	2	0.5	0.969713	0.317972	1	1	A0A1D8PND1_CANAL
biological_process	GO:0006147	guanine catabolic process	1	1	1	1	0.174129	1	1	A0A1D8PQQ8_CANAL
biological_process	GO:0046098	guanine metabolic process	1	1	1	1	0.174129	1	1	A0A1D8PQQ8_CANAL
biological_process	GO:0036267	invasive filamentous growth	1	4	0.25	0.840087	0.342157	1	1	A0A1D8PFH4_CANAL
biological_process	GO:0060236	regulation of mitotic spindle organization	1	2	0.5	0.981692	0.142365	1	1	Q5A4Z1_CANAL
biological_process	GO:0007323	peptide pheromone maturation	1	3	0.333333	0.857635	0.53493	1	1	A0A1D8PEG3_CANAL
biological_process	GO:0018343	protein farnesylation	1	2	0.5	0.969713	0.317972	1	1	A0A1D8PLY3_CANAL
biological_process	GO:0031122	cytoplasmic microtubule organization	1	7	0.142857	0.804116	0.482254	1	1	A0A1D8PSA3_CANAL
biological_process	GO:0030952	establishment or maintenance of cytoskeleton polarity	1	2	0.5	0.997564	0.0204882	1	1	A0A1D8PFH4_CANAL
biological_process	GO:0031382	mating projection formation	1	1	1	0.919663	0.436789	1	1	A0A1D8PFH4_CANAL
biological_process	GO:0090338	positive regulation of formin-nucleated actin cable assembly	1	2	0.5	0.969713	0.317972	1	1	A0A1D8PE85_CANAL
biological_process	GO:0019388	galactose catabolic process	1	6	0.166667	0.718744	0.682936	1	1	A0A1D8PF20_CANAL
biological_process	GO:0009887	animal organ morphogenesis	1	1	1	1	0.174129	1	1	A0A1D8PP44_CANAL
biological_process	GO:0009948	anterior/posterior axis specification	1	1	1	1	0.174129	1	1	A0A1D8PP44_CANAL
biological_process	GO:0043007	maintenance of rDNA	1	2	0.5	0.969713	0.317972	1	1	Q59LD5_CANAL
biological_process	GO:0032509	endosome transport via multivesicular body sorting pathway	1	4	0.25	0.797231	0.359297	1	1	A0A1D8PI74_CANAL
biological_process	GO:0070880	fungal-type cell wall beta-glucan biosynthetic process	1	2	0.5	0.648796	0.738225	1	1	A0A1D8PE53_CANAL
biological_process	GO:0038203	TORC2 signaling	1	4	0.25	0.789306	0.61599	1	1	A0A1D8PPT0_CANAL
biological_process	GO:0051086	chaperone mediated protein folding independent of cofactor	1	6	0.166667	0.718744	0.682936	1	1	Q59YH4_CANAL
biological_process	GO:0045002	double-strand break repair via single-strand annealing	1	2	0.5	0.857635	0.53493	1	1	Q59NG2_CANAL
biological_process	GO:0045721	negative regulation of gluconeogenesis	1	2	0.5	0.969713	0.317972	1	1	A0A1D8PM68_CANAL
biological_process	GO:0006282	regulation of DNA repair	1	3	0.333333	0.893616	0.351204	1	1	Q59S64_CANAL
biological_process	GO:0009058	biosynthetic process	1	8	0.125	0.986468	0.0166996	1	1	A0A1D8PJ15_CANAL
biological_process	GO:0031137	regulation of conjugation with cellular fusion	1	2	0.5	0.823106	0.325756	1	1	A0A1D8PHU1_CANAL
biological_process	GO:0046856	phosphatidylinositol dephosphorylation	1	7	0.142857	0.581384	0.783883	1	1	A0A1D8PQ27_CANAL
biological_process	GO:0015916	fatty-acyl-CoA transport	1	2	0.5	0.969713	0.317972	1	1	A0A1D8PRN3_CANAL
biological_process	GO:0042758	long-chain fatty acid catabolic process	1	2	0.5	0.969713	0.317972	1	1	A0A1D8PRN3_CANAL
biological_process	GO:0015910	long-chain fatty acid import into peroxisome	1	2	0.5	0.969713	0.317972	1	1	A0A1D8PRN3_CANAL
biological_process	GO:0042760	very long-chain fatty acid catabolic process	1	2	0.5	0.969713	0.317972	1	1	A0A1D8PRN3_CANAL
biological_process	GO:0001080	nitrogen catabolite activation of transcription from RNA polymerase II promoter	1	2	0.5	0.969713	0.317972	1	1	Q5A876_CANAL
biological_process	GO:0000481	maturation of 5S rRNA	1	1	1	1	0.174129	1	1	A0A1D8PNL9_CANAL
biological_process	GO:0000730	DNA recombinase assembly	1	4	0.25	0.789306	0.61599	1	1	Q59NG2_CANAL
biological_process	GO:0051307	meiotic chromosome separation	1	1	1	0.891524	0.297186	1	1	A0A1D8PCM0_CANAL
biological_process	GO:0010995	free ubiquitin chain depolymerization	1	1	1	1	0.174129	1	1	A0A1D8PIM4_CANAL
biological_process	GO:0031647	regulation of protein stability	1	1	1	0.549044	0.729107	1	1	A0A1D8PIM4_CANAL
biological_process	GO:0051754	meiotic sister chromatid cohesion, centromeric	1	2	0.5	0.981692	0.142365	1	1	A0A1D8PLR1_CANAL
biological_process	GO:0071577	zinc ion transmembrane transport	1	4	0.25	0.857635	0.53493	1	1	A0A1D8PGH6_CANAL
biological_process	GO:0016562	protein import into peroxisome matrix, receptor recycling	1	3	0.333333	0.919663	0.436789	1	1	Q59ZE6_CANAL
biological_process	GO:0002184	cytoplasmic translational termination	1	2	0.5	0.969713	0.317972	1	1	Q59YE8_CANAL
biological_process	GO:0071805	potassium ion transmembrane transport	1	2	0.5	0.718744	0.682936	1	1	Q59NG8_CANAL
biological_process	GO:0000379	tRNA-type intron splice site recognition and cleavage	1	4	0.25	0.857635	0.53493	1	1	A0A1D8PKA3_CANAL
biological_process	GO:0035965	cardiolipin acyl-chain remodeling	1	5	0.2	0.789306	0.61599	1	1	A0A1D8PIA5_CANAL
biological_process	GO:0006449	regulation of translational termination	1	6	0.166667	0.648796	0.738225	1	1	A0A1D8PTY4_CANAL
biological_process	GO:0001208	obsolete histone H2A-H2B dimer displacement	1	1	1	1	0.174129	1	1	A0A1D8PTM3_CANAL
biological_process	GO:0061635	regulation of protein complex stability	1	1	1	1	0.174129	1	1	A0A1D8PTM3_CANAL
biological_process	GO:0010767	regulation of transcription from RNA polymerase II promoter in response to UV-induced DNA damage	1	1	1	1	0.030287	1	1	A0A1D8PTM3_CANAL
biological_process	GO:0035023	regulation of Rho protein signal transduction	1	1	1	0.994738	0.0803369	1	1	A0A1D8PPS6_CANAL
biological_process	GO:0018026	peptidyl-lysine monomethylation	1	6	0.166667	0.718744	0.682936	1	1	A0A1D8PNN9_CANAL
biological_process	GO:0006661	phosphatidylinositol biosynthetic process	1	2	0.5	0.359085	0.784507	1	1	Q5A352_CANAL
biological_process	GO:0034398	telomere tethering at nuclear periphery	1	1	1	1	0.174129	1	1	A0A1D8PMK3_CANAL
biological_process	GO:0007020	microtubule nucleation	1	4	0.25	0.857635	0.53493	1	1	Q5A880_CANAL
biological_process	GO:0031848	protection from non-homologous end joining at telomere	1	2	0.5	0.969713	0.317972	1	1	A0A1D8PCQ2_CANAL
biological_process	GO:0007026	negative regulation of microtubule depolymerization	1	1	1	1	0.174129	1	1	A0A1D8PIP2_CANAL
biological_process	GO:0030473	nuclear migration along microtubule	1	4	0.25	0.804116	0.482254	1	1	A0A1D8PIP2_CANAL
biological_process	GO:0000729	DNA double-strand break processing	1	2	0.5	0.718744	0.682936	1	1	A0A1D8PTJ0_CANAL
biological_process	GO:0070192	chromosome organization involved in meiotic cell cycle	1	3	0.333333	0.985624	0.0454769	1	1	A0A1D8PJD1_CANAL
biological_process	GO:0008655	pyrimidine-containing compound salvage	1	4	0.25	0.789306	0.61599	1	1	Q5ANN6_CANAL
biological_process	GO:0071035	nuclear polyadenylation-dependent rRNA catabolic process	1	7	0.142857	0.648796	0.738225	1	1	A0A1D8PLY1_CANAL
biological_process	GO:0006813	potassium ion transport	1	4	0.25	0.804116	0.482254	1	1	A0A1D8PDU7_CANAL
biological_process	GO:0016233	telomere capping	1	4	0.25	0.893616	0.351204	1	1	A0A1D8PI83_CANAL
biological_process	GO:0080009	mRNA methylation	1	3	0.333333	0.919663	0.436789	1	1	Q5ALV0_CANAL
biological_process	GO:0045010	actin nucleation	1	1	1	0.987366	0.0454241	1	1	A0A1D8PJ75_CANAL
biological_process	GO:0034079	butanediol biosynthetic process	1	2	0.5	0.969713	0.317972	1	1	A0A1D8PSZ0_CANAL
biological_process	GO:0006972	hyperosmotic response	1	2	0.5	0.718744	0.682936	1	1	Q5ADP3_CANAL
biological_process	GO:1990414	replication-born double-strand break repair via sister chromatid exchange	1	3	0.333333	0.919663	0.436789	1	1	A0A1D8PU88_CANAL
biological_process	GO:0090038	negative regulation of protein kinase C signaling	1	1	1	1	0.174129	1	1	A0A1D8PRQ6_CANAL
biological_process	GO:0035024	negative regulation of Rho protein signal transduction	1	1	1	1	0.174129	1	1	A0A1D8PRQ6_CANAL
biological_process	GO:0098787	mRNA cleavage involved in mRNA processing	1	2	0.5	0.919641	0.216269	1	1	A0A1D8PE76_CANAL
biological_process	GO:0051642	centrosome localization	1	1	1	1	0.174129	1	1	Q5A880_CANAL
biological_process	GO:0051303	establishment of chromosome localization	1	1	1	0.940051	0.177438	1	1	Q5A880_CANAL
biological_process	GO:0043966	histone H3 acetylation	1	5	0.2	0.650848	0.644955	1	1	A0A1D8PNT2_CANAL
biological_process	GO:0044773	mitotic DNA damage checkpoint signaling	1	2	0.5	0.355045	0.899652	1	1	A0A1D8PP50_CANAL
biological_process	GO:0006751	glutathione catabolic process	1	4	0.25	0.857635	0.53493	1	1	A0A1D8PDN2_CANAL
biological_process	GO:1903452	positive regulation of G1 to G0 transition	1	1	1	1	0.174129	1	1	A0A1D8PQP1_CANAL
biological_process	GO:0010628	positive regulation of gene expression	1	1	1	0.553784	0.656058	1	1	A0A1D8PQP1_CANAL
biological_process	GO:0045719	negative regulation of glycogen biosynthetic process	1	1	1	1	0.174129	1	1	A0A1D8PKQ6_CANAL
biological_process	GO:0035494	SNARE complex disassembly	1	2	0.5	0.969713	0.317972	1	1	A0A1D8PFN6_CANAL
biological_process	GO:0010620	negative regulation of transcription by transcription factor catabolism	1	2	0.5	0.969713	0.317972	1	1	Q59S64_CANAL
biological_process	GO:0035977	protein deglycosylation involved in glycoprotein catabolic process	1	1	1	0.969713	0.317972	1	1	A0A1D8PGE3_CANAL
biological_process	GO:0097466	ubiquitin-dependent glycoprotein ERAD pathway	1	1	1	0.969713	0.317972	1	1	A0A1D8PGE3_CANAL
biological_process	GO:0070124	mitochondrial translational initiation	1	2	0.5	0.969713	0.317972	1	1	A0A1D8PH91_CANAL
biological_process	GO:0000375	RNA splicing, via transesterification reactions	1	1	1	0.834045	0.240556	1	1	A0A1D8PGF5_CANAL
biological_process	GO:0031398	positive regulation of protein ubiquitination	1	2	0.5	0.789306	0.61599	1	1	A0A1D8PJV5_CANAL
biological_process	GO:1901717	positive regulation of gamma-aminobutyric acid catabolic process	1	1	1	1	0.174129	1	1	Q5A876_CANAL
biological_process	GO:1901714	positive regulation of urea catabolic process	1	1	1	1	0.174129	1	1	Q5A876_CANAL
biological_process	GO:0033217	regulation of transcription from RNA polymerase II promoter in response to iron ion starvation	1	2	0.5	0.999087	0.0183084	1	1	A0A1D8PN26_CANAL
biological_process	GO:0008202	steroid metabolic process	1	1	1	0.0725616	0.976224	1	1	A0A1D8PPK1_CANAL
biological_process	GO:0070887	cellular response to chemical stimulus	1	3	0.333333	0.977209	0.0326179	1	1	A0A1D8PI40_CANAL
biological_process	GO:0071479	cellular response to ionizing radiation	1	2	0.5	0.981692	0.142365	1	1	Q59NG2_CANAL
biological_process	GO:2000728	regulation of mRNA export from nucleus in response to heat stress	1	1	1	1	0.174129	1	1	A0A1D8PQE5_CANAL
biological_process	GO:0017198	N-terminal peptidyl-serine acetylation	1	2	0.5	0.969713	0.317972	1	1	A0A1D8PNA3_CANAL
biological_process	GO:0032012	regulation of ARF protein signal transduction	1	3	0.333333	0.919663	0.436789	1	1	A0A1D8PRB9_CANAL
biological_process	GO:0044275	cellular carbohydrate catabolic process	1	1	1	0.113093	0.978417	1	1	A0A1D8PH05_CANAL
biological_process	GO:1900441	negative regulation of filamentous growth of a population of unicellular organisms in response to neutral pH	1	1	1	1	0.174129	1	1	A0A1D8PN26_CANAL
biological_process	GO:0010255	glucose mediated signaling pathway	1	2	0.5	0.648796	0.738225	1	1	A0A1D8PJG1_CANAL
biological_process	GO:0010970	transport along microtubule	1	1	1	0.957146	0.141287	1	1	A0A1D8PU90_CANAL
biological_process	GO:0006913	nucleocytoplasmic transport	1	3	0.333333	0.917605	0.126534	1	1	A0A1D8PDH5_CANAL
biological_process	GO:0009443	pyridoxal 5'-phosphate salvage	1	2	0.5	0.969713	0.317972	1	1	Q59MC6_CANAL
biological_process	GO:0031030	negative regulation of septation initiation signaling	1	6	0.166667	0.718744	0.682936	1	1	A0A1D8PPB7_CANAL
biological_process	GO:0030001	metal ion transport	1	3	0.333333	0.255706	0.889004	1	1	A0A1D8PJV5_CANAL
biological_process	GO:0033316	meiotic spindle assembly checkpoint signaling	1	1	1	1	0.174129	1	1	A0A1D8PTW7_CANAL
biological_process	GO:0071480	cellular response to gamma radiation	1	2	0.5	0.969713	0.317972	1	1	A0A1D8PF81_CANAL
biological_process	GO:0071481	cellular response to X-ray	1	2	0.5	0.969713	0.317972	1	1	A0A1D8PF81_CANAL
biological_process	GO:0006529	asparagine biosynthetic process	1	2	0.5	0.969713	0.317972	1	1	A0A1D8PIA3_CANAL
biological_process	GO:0016570	histone modification	1	4	0.25	0.770239	0.322046	1	1	Q59Y36_CANAL
biological_process	GO:0010972	negative regulation of G2/M transition of mitotic cell cycle	1	2	0.5	0.940051	0.177438	1	1	A0A1D8PJ80_CANAL
biological_process	GO:0010515	negative regulation of induction of conjugation with cellular fusion	1	3	0.333333	0.919663	0.436789	1	1	A0A1D8PJ80_CANAL
biological_process	GO:0000378	RNA exon ligation	1	1	1	1	0.174129	1	1	A0A1D8PS92_CANAL
biological_process	GO:0040031	snRNA modification	1	1	1	0.960128	0.210694	1	1	A0A1D8PS92_CANAL
biological_process	GO:0006857	oligopeptide transport	1	2	0.5	0.355045	0.899652	1	1	Q5A8H9_CANAL
biological_process	GO:0061025	membrane fusion	1	2	0.5	0.946067	0.110884	1	1	A0A1D8PMA2_CANAL
biological_process	GO:0044528	regulation of mitochondrial mRNA stability	1	1	1	1	0.174129	1	1	A0A1D8PMA5_CANAL
biological_process	GO:0048193	Golgi vesicle transport	1	1	1	0.964223	0.0571391	1	1	A0A1D8PFN6_CANAL
biological_process	GO:0048219	inter-Golgi cisterna vesicle-mediated transport	1	1	1	1	0.174129	1	1	A0A1D8PFN6_CANAL
biological_process	GO:0006955	immune response	1	2	0.5	0.718744	0.682936	1	1	A0A1D8PIN2_CANAL
biological_process	GO:0002224	toll-like receptor signaling pathway	1	2	0.5	0.969713	0.317972	1	1	A0A1D8PIN2_CANAL
biological_process	GO:0044030	regulation of DNA methylation	1	1	1	1	0.174129	1	1	Q5AJ72_CANAL
biological_process	GO:0006295	nucleotide-excision repair, DNA incision, 3'-to lesion	1	1	1	1	0.174129	1	1	A0A1D8PLU8_CANAL
biological_process	GO:0045033	peroxisome inheritance	1	1	1	1	0.174129	1	1	Q5AH13_CANAL
biological_process	GO:0090158	endoplasmic reticulum membrane organization	1	1	1	0.960128	0.210694	1	1	A0A1D8PQC2_CANAL
biological_process	GO:0061817	endoplasmic reticulum-plasma membrane tethering	1	3	0.333333	0.919663	0.436789	1	1	A0A1D8PQC2_CANAL
biological_process	GO:0008153	para-aminobenzoic acid biosynthetic process	1	1	1	1	0.174129	1	1	A0A1D8PMB0_CANAL
biological_process	GO:0030307	positive regulation of cell growth	1	1	1	0.994738	0.0803369	1	1	Q5A2C3_CANAL
biological_process	GO:0001516	prostaglandin biosynthetic process	1	2	0.5	0.969713	0.317972	1	1	A0A1D8PHT9_CANAL
biological_process	GO:0030643	cellular phosphate ion homeostasis	1	1	1	1	0.174129	1	1	A0A1D8PMD1_CANAL
biological_process	GO:0071243	cellular response to arsenic-containing substance	1	1	1	1	0.174129	1	1	A0A1D8PMD1_CANAL
biological_process	GO:0006741	NADP biosynthetic process	1	2	0.5	0.969713	0.317972	1	1	A0A1D8PKE0_CANAL
biological_process	GO:0070973	protein localization to endoplasmic reticulum exit site	1	3	0.333333	0.919663	0.436789	1	1	A0A1D8PNM2_CANAL
biological_process	GO:0009259	ribonucleotide metabolic process	1	1	1	0.000701591	0.99979	0.138	1	A0A1D8PIB8_CANAL
biological_process	GO:0006423	cysteinyl-tRNA aminoacylation	1	1	1	1	0.174129	1	1	Q5AL46_CANAL
biological_process	GO:0030951	establishment or maintenance of microtubule cytoskeleton polarity	1	1	1	1	0.174129	1	1	A0A1D8PTZ8_CANAL
biological_process	GO:0045807	positive regulation of endocytosis	1	2	0.5	0.789306	0.61599	1	1	A0A1D8PT49_CANAL
biological_process	GO:0010992	ubiquitin recycling	1	1	1	0.981692	0.142365	1	1	A0A1D8PEM3_CANAL
biological_process	GO:0009202	deoxyribonucleoside triphosphate biosynthetic process	1	1	1	0.857635	0.53493	1	1	A0A1D8PJZ1_CANAL
biological_process	GO:0042326	negative regulation of phosphorylation	1	1	1	0.648796	0.738225	1	1	A0A1D8PJZ1_CANAL
biological_process	GO:1901857	positive regulation of cellular respiration	1	2	0.5	0.969713	0.317972	1	1	A0A1D8PJZ1_CANAL
biological_process	GO:0033386	geranylgeranyl diphosphate biosynthetic process	1	1	1	1	0.174129	1	1	A0A1D8PNS6_CANAL
biological_process	GO:0031340	positive regulation of vesicle fusion	1	1	1	1	0.174129	1	1	Q5AH58_CANAL
biological_process	GO:0070935	3'-UTR-mediated mRNA stabilization	1	1	1	1	0.174129	1	1	A0A1D8PQ55_CANAL
biological_process	GO:0045185	maintenance of protein location	1	1	1	0.17676	0.961581	1	1	A0A1D8PLB6_CANAL
biological_process	GO:0071432	peptide mating pheromone maturation involved in positive regulation of conjugation with cellular fusion	1	2	0.5	0.969713	0.317972	1	1	A0A1D8PEG3_CANAL
biological_process	GO:0045056	transcytosis	1	1	1	1	0.174129	1	1	A0A1D8PMA2_CANAL
biological_process	GO:0061188	negative regulation of ribosomal DNA heterochromatin assembly	1	4	0.25	0.857635	0.53493	1	1	A0A1D8PNP8_CANAL
biological_process	GO:0061186	negative regulation of silent mating-type cassette heterochromatin assembly	1	4	0.25	0.857635	0.53493	1	1	A0A1D8PNP8_CANAL
biological_process	GO:0016242	negative regulation of macroautophagy	1	2	0.5	0.969713	0.317972	1	1	A0A1D8PHX3_CANAL
biological_process	GO:0051598	meiotic recombination checkpoint signaling	1	1	1	1	0.174129	1	1	Q5A928_CANAL
biological_process	GO:0034508	centromere complex assembly	1	1	1	0.976788	0.0803589	1	1	A0A1D8PPT2_CANAL
biological_process	GO:0016479	negative regulation of transcription by RNA polymerase I	1	2	0.5	0.919663	0.436789	1	1	A0A1D8PNP8_CANAL
biological_process	GO:0000717	nucleotide-excision repair, DNA duplex unwinding	1	1	1	1	0.174129	1	1	A0A1D8PQH0_CANAL
biological_process	GO:0045951	positive regulation of mitotic recombination	1	1	1	1	0.174129	1	1	A0A1D8PQH0_CANAL
biological_process	GO:0072318	clathrin coat disassembly	1	1	1	1	0.174129	1	1	A0A1D8PTM6_CANAL
biological_process	GO:0030953	astral microtubule organization	1	1	1	0.969713	0.317972	1	1	A0A1D8PE85_CANAL
biological_process	GO:0034652	extrachromosomal circular DNA localization involved in cell aging	1	1	1	1	0.174129	1	1	A0A1D8PE85_CANAL
biological_process	GO:2000251	positive regulation of actin cytoskeleton reorganization	1	1	1	1	0.174129	1	1	A0A1D8PE85_CANAL
biological_process	GO:0051127	positive regulation of actin nucleation	1	1	1	0.989827	0.0695714	1	1	A0A1D8PE85_CANAL
biological_process	GO:0030003	cellular cation homeostasis	1	1	1	0.222053	0.843819	1	1	A0A1D8PT49_CANAL
biological_process	GO:0009594	detection of nutrient	1	1	1	1	0.174129	1	1	A0A1D8PT49_CANAL
biological_process	GO:1903329	regulation of iron-sulfur cluster assembly	1	1	1	1	0.174129	1	1	A0A1D8PT49_CANAL
biological_process	GO:0035429	gluconate transmembrane transport	1	1	1	1	0.174129	1	1	A0A1D8PND1_CANAL
biological_process	GO:1902974	meiotic DNA replication initiation	1	1	1	1	0.174129	1	1	Q5ALV0_CANAL
biological_process	GO:0036165	invasive growth in response to heat	1	1	1	1	0.174129	1	1	A0A1D8PJG1_CANAL
biological_process	GO:0048208	COPII vesicle coating	1	1	1	0.981692	0.142365	1	1	A0A1D8PNM2_CANAL
biological_process	GO:0010512	negative regulation of phosphatidylinositol biosynthetic process	1	1	1	1	0.174129	1	1	A0A1D8PTP5_CANAL
biological_process	GO:0030705	cytoskeleton-dependent intracellular transport	1	2	0.5	0.997187	0.012634	1	1	Q5A3K5_CANAL
biological_process	GO:0007249	I-kappaB kinase/NF-kappaB signaling	1	1	1	1	0.174129	1	1	Q59MV2_CANAL
biological_process	GO:0000432	positive regulation of transcription from RNA polymerase II promoter by glucose	1	1	1	1	0.174129	1	1	Q59SE2_CANAL
biological_process	GO:2001278	positive regulation of leucine biosynthetic process	1	1	1	1	0.174129	1	1	A0A1D8PND3_CANAL
biological_process	GO:2001165	positive regulation of phosphorylation of RNA polymerase II C-terminal domain serine 2 residues	1	1	1	1	0.174129	1	1	A0A1D8PQN1_CANAL
biological_process	GO:2001173	regulation of histone H2B conserved C-terminal lysine ubiquitination	1	1	1	1	0.174129	1	1	A0A1D8PQN1_CANAL
biological_process	GO:2001160	regulation of histone H3-K79 methylation	1	1	1	1	0.174129	1	1	A0A1D8PQN1_CANAL
biological_process	GO:0001015	snoRNA transcription by RNA polymerase II	1	1	1	1	0.174129	1	1	A0A1D8PQN1_CANAL
biological_process	GO:0048026	positive regulation of mRNA splicing, via spliceosome	1	1	1	1	0.174129	1	1	Q5ANB5_CANAL
biological_process	GO:0061987	negative regulation of transcription from RNA polymerase II promoter by glucose	1	2	0.5	0.857635	0.53493	1	1	A0A1D8PNL1_CANAL
biological_process	GO:0001100	negative regulation of exit from mitosis	1	1	1	0.789306	0.61599	1	1	A0A1D8PHD2_CANAL
biological_process	GO:1905561	positive regulation of kinetochore assembly	1	1	1	1	0.174129	1	1	A0A1D8PHD2_CANAL
biological_process	GO:0060903	positive regulation of meiosis I	1	1	1	1	0.174129	1	1	A0A1D8PHD2_CANAL
biological_process	GO:1905263	positive regulation of meiotic DNA double-strand break formation involved in reciprocal meiotic recombination	1	1	1	1	0.174129	1	1	A0A1D8PHD2_CANAL
biological_process	GO:1904968	positive regulation of monopolar spindle attachment to meiosis I kinetochore	1	1	1	1	0.174129	1	1	A0A1D8PHD2_CANAL
biological_process	GO:0006279	premeiotic DNA replication	1	1	1	1	0.174129	1	1	A0A1D8PHD2_CANAL
biological_process	GO:0031503	protein-containing complex localization	1	1	1	0.867002	0.206054	1	1	A0A1D8PHD2_CANAL
biological_process	GO:0030999	linear element assembly	1	1	1	1	0.174129	1	1	Q59S64_CANAL
biological_process	GO:0051755	meiotic sister chromatid arm separation	1	1	1	1	0.174129	1	1	Q59S64_CANAL
biological_process	GO:0010895	negative regulation of ergosterol biosynthetic process	1	1	1	1	0.174129	1	1	Q59S64_CANAL
biological_process	GO:0010845	positive regulation of reciprocal meiotic recombination	1	1	1	1	0.174129	1	1	Q59S64_CANAL
biological_process	GO:0032933	SREBP signaling pathway	1	1	1	0.718744	0.682936	1	1	Q59S64_CANAL
biological_process	GO:0043945	positive regulation of asexual sporulation resulting in formation of a cellular spore	1	1	1	1	0.174129	1	1	Q59WD1_CANAL
biological_process	GO:0006256	UDP catabolic process	1	1	1	1	0.174129	1	1	Q5A1A4_CANAL
biological_process	GO:1904802	RITS complex assembly	1	1	1	1	0.174129	1	1	A0A1D8PPU7_CANAL
biological_process	GO:2001158	positive regulation of proline catabolic process to glutamate	1	1	1	1	0.174129	1	1	Q5AAV6_CANAL
biological_process	GO:1900364	negative regulation of mRNA polyadenylation	1	1	1	1	0.174129	1	1	A0A1D8PCH2_CANAL
biological_process	GO:0045898	regulation of RNA polymerase II transcription preinitiation complex assembly	1	1	1	0.702814	0.595654	1	1	A0A1D8PH70_CANAL
biological_process	GO:0033674	positive regulation of kinase activity	1	1	1	0.75428	0.541387	1	1	Q5A352_CANAL
biological_process	GO:0042632	cholesterol homeostasis	1	1	1	1	0.174129	1	1	Q5AD30_CANAL
biological_process	GO:0007040	lysosome organization	1	1	1	1	0.174129	1	1	Q5AD30_CANAL
biological_process	GO:0001919	regulation of receptor recycling	1	1	1	1	0.174129	1	1	Q5AD30_CANAL
biological_process	GO:0044211	CTP salvage	1	1	1	1	0.174129	1	1	Q5ANN6_CANAL
biological_process	GO:0062022	mitotic cohesin ssDNA (lagging strand) loading	1	1	1	1	0.174129	1	1	A0A1D8PJK7_CANAL
biological_process	GO:0006990	positive regulation of transcription from RNA polymerase II promoter involved in unfolded protein response	1	1	1	1	0.174129	1	1	A0A1D8PDR2_CANAL
biological_process	GO:0034643	establishment of mitochondrion localization, microtubule-mediated	1	1	1	1	0.174129	1	1	A0A1D8PKC9_CANAL
biological_process	GO:0090149	mitochondrial membrane fission	1	1	1	1	0.174129	1	1	A0A1D8PKC9_CANAL
biological_process	GO:0140572	vacuole fission	1	1	1	1	0.174129	1	1	A0A1D8PKC9_CANAL
biological_process	GO:0070059	intrinsic apoptotic signaling pathway in response to endoplasmic reticulum stress	1	1	1	1	0.174129	1	1	A0A1D8PE76_CANAL
biological_process	GO:0036498	IRE1-mediated unfolded protein response	1	2	0.5	0.969713	0.317972	1	1	A0A1D8PE76_CANAL
biological_process	GO:0036290	protein trans-autophosphorylation	1	1	1	1	0.174129	1	1	A0A1D8PE76_CANAL
biological_process	GO:1990813	meiotic centromeric cohesion protection	1	2	0.5	0.969713	0.317972	1	1	A0A1D8PJ80_CANAL
biological_process	GO:0000348	mRNA branch site recognition	1	1	1	1	0.174129	1	1	A0A1D8PFH7_CANAL
biological_process	GO:0010507	negative regulation of autophagy	1	1	1	0.994738	0.0803369	1	1	A0A1D8PI64_CANAL
biological_process	GO:0051654	establishment of mitochondrion localization	0	4	0	0.789306	0.61599	1	1
biological_process	GO:0034411	cell wall (1->3)-beta-D-glucan biosynthetic process	0	5	0	0.38401	1	1	1
biological_process	GO:0071970	fungal-type cell wall (1->3)-beta-D-glucan biosynthetic process	0	5	0	0.38401	1	1	1
biological_process	GO:0030476	ascospore wall assembly	0	9	0	0.178413	1	1	1
biological_process	GO:0006014	D-ribose metabolic process	0	1	0	0.682028	1	1	1
biological_process	GO:0009052	pentose-phosphate shunt, non-oxidative branch	0	3	0	0.563211	1	1	1
biological_process	GO:0008615	pyridoxine biosynthetic process	0	3	0	0.563211	1	1	1
biological_process	GO:0046034	ATP metabolic process	0	3	0	6.68852e-07	1	0	1
biological_process	GO:1902600	proton transmembrane transport	0	7	0	0.0232186	0.996853	0.995	1
biological_process	GO:0006037	cell wall chitin metabolic process	0	3	0	0.702814	0.595654	1	1
biological_process	GO:0032447	protein urmylation	0	4	0	0.46507	1	1	1
biological_process	GO:0002143	tRNA wobble position uridine thiolation	0	7	0	0.261775	1	1	1
biological_process	GO:0006207	'de novo' pyrimidine nucleobase biosynthetic process	0	9	0	0.178413	1	1	1
biological_process	GO:0044205	'de novo' UMP biosynthetic process	0	5	0	0.38401	1	1	1
biological_process	GO:0009220	pyrimidine ribonucleotide biosynthetic process	0	1	0	0.404346	0.878427	1	1
biological_process	GO:0000725	recombinational repair	0	5	0	0.411073	0.734414	1	1
biological_process	GO:2001040	positive regulation of cellular response to drug	0	1	0	0.825871	1	1	1
biological_process	GO:0002181	cytoplasmic translation	0	27	0	0.000905091	0.999828	0.173	1
biological_process	GO:0000915	actomyosin contractile ring assembly	0	3	0	0.068358	1	1	1
biological_process	GO:0061640	cytoskeleton-dependent cytokinesis	0	7	0	0.870061	0.225273	1	1
biological_process	GO:0000917	division septum assembly	0	4	0	0.742896	0.499419	1	1
biological_process	GO:1903475	mitotic actomyosin contractile ring assembly	0	6	0	0.100348	1	1	1
biological_process	GO:0000280	nuclear division	0	5	0	0.960343	0.0622364	1	1
biological_process	GO:0032259	methylation	0	26	0	0.00134739	0.999577	0.249	1
biological_process	GO:0007234	osmosensory signaling via phosphorelay pathway	0	3	0	0.563211	1	1	1
biological_process	GO:0071465	cellular response to desiccation	0	1	0	0.825871	1	1	1
biological_process	GO:0005992	trehalose biosynthetic process	0	3	0	0.563211	1	1	1
biological_process	GO:0097043	histone H3-K56 acetylation	0	3	0	0.563211	1	1	1
biological_process	GO:0000387	spliceosomal snRNP assembly	0	10	0	0.310629	0.917175	1	1
biological_process	GO:0019430	removal of superoxide radicals	0	6	0	0.317064	1	1	1
biological_process	GO:0048869	cellular developmental process	0	2	0	0.725228	0.393218	1	1
biological_process	GO:0097320	plasma membrane tubulation	0	5	0	0.38401	1	1	1
biological_process	GO:0030435	sporulation resulting in formation of a cellular spore	0	5	0	0.491516	0.66597	1	1
biological_process	GO:0032543	mitochondrial translation	0	24	0	0.00308877	0.99969	0.493	1
biological_process	GO:0006094	gluconeogenesis	0	10	0	0.355045	0.899652	1	1
biological_process	GO:0034553	mitochondrial respiratory chain complex II assembly	0	4	0	0.46507	1	1	1
biological_process	GO:0006105	succinate metabolic process	0	1	0	0.825871	1	1	1
biological_process	GO:0035493	SNARE complex assembly	0	2	0	0.682028	1	1	1
biological_process	GO:0042850	L-sorbose catabolic process	0	2	0	0.682028	1	1	1
biological_process	GO:0000162	tryptophan biosynthetic process	0	7	0	0.261775	1	1	1
biological_process	GO:0034243	regulation of transcription elongation from RNA polymerase II promoter	0	1	0	0.965443	0.0901223	1	1
biological_process	GO:0000469	cleavage involved in rRNA processing	0	3	0	0.235529	0.87917	1	1
biological_process	GO:0006458	'de novo' protein folding	0	4	0	0.16334	0.947985	1	1
biological_process	GO:0000272	polysaccharide catabolic process	0	7	0	0.0465567	1	1	1
biological_process	GO:0006419	alanyl-tRNA aminoacylation	0	2	0	0.682028	1	1	1
biological_process	GO:0070143	mitochondrial alanyl-tRNA aminoacylation	0	1	0	0.825871	1	1	1
biological_process	GO:0006400	tRNA modification	0	8	0	0.169231	0.909632	1	1
biological_process	GO:0006336	DNA replication-independent chromatin assembly	0	5	0	0.804116	0.482254	1	1
biological_process	GO:0120113	cytoplasm to vacuole transport by the NVT pathway	0	3	0	0.563211	1	1	1
biological_process	GO:0043171	peptide catabolic process	0	4	0	0.581384	0.783883	1	1
biological_process	GO:0009107	lipoate biosynthetic process	0	1	0	0.825871	1	1	1
biological_process	GO:0006108	malate metabolic process	0	6	0	0.317064	1	1	1
biological_process	GO:0006099	tricarboxylic acid cycle	0	24	0	0.00999716	1	0.886	1
biological_process	GO:0072659	protein localization to plasma membrane	0	4	0	0.235557	0.943585	1	1
biological_process	GO:0035551	protein initiator methionine removal involved in protein maturation	0	1	0	0.825871	1	1	1
biological_process	GO:0002183	cytoplasmic translational initiation	0	8	0	0.126501	0.962213	1	1
biological_process	GO:0042730	fibrinolysis	0	1	0	0.825871	1	1	1
biological_process	GO:0006096	glycolytic process	0	15	0	0.0215826	1	0.993	1
biological_process	GO:0071629	cytoplasm protein quality control by the ubiquitin-proteasome system	0	6	0	0.317064	1	1	1
biological_process	GO:0018345	protein palmitoylation	0	1	0	0.648796	0.738225	1	1
biological_process	GO:0009060	aerobic respiration	0	20	0	1.57973e-07	1	0	1
biological_process	GO:0015990	electron transport coupled proton transport	0	4	0	0.46507	1	1	1
biological_process	GO:0006123	mitochondrial electron transport, cytochrome c to oxygen	0	12	0	0.100348	1	1	1
biological_process	GO:0022904	respiratory electron transport chain	0	3	0	7.9976e-05	1	0.018	1
biological_process	GO:0034614	cellular response to reactive oxygen species	0	4	0	0.068358	1	1	1
biological_process	GO:1902660	negative regulation of glucose mediated signaling pathway	0	3	0	0.563211	1	1	1
biological_process	GO:1902413	negative regulation of mitotic cytokinesis	0	1	0	0.682028	1	1	1
biological_process	GO:1905665	positive regulation of calcium ion import across plasma membrane	0	1	0	0.825871	1	1	1
biological_process	GO:0031098	stress-activated protein kinase signaling cascade	0	3	0	0.458613	0.85272	1	1
biological_process	GO:0034354	'de novo' NAD biosynthetic process from tryptophan	0	7	0	0.261775	1	1	1
biological_process	GO:0043420	anthranilate metabolic process	0	3	0	0.563211	1	1	1
biological_process	GO:0070189	kynurenine metabolic process	0	1	0	0.46507	1	1	1
biological_process	GO:0019805	quinolinate biosynthetic process	0	3	0	0.563211	1	1	1
biological_process	GO:0006569	tryptophan catabolic process	0	2	0	0.38401	1	1	1
biological_process	GO:0051016	barbed-end actin filament capping	0	6	0	0.261775	1	1	1
biological_process	GO:0051131	chaperone-mediated protein complex assembly	0	6	0	0.317064	1	1	1
biological_process	GO:0070407	oxidation-dependent protein catabolic process	0	1	0	0.825871	1	1	1
biological_process	GO:0009085	lysine biosynthetic process	0	5	0	0.100348	1	1	1
biological_process	GO:0019878	lysine biosynthetic process via aminoadipic acid	0	9	0	0.178413	1	1	1
biological_process	GO:1902626	assembly of large subunit precursor of preribosome	0	2	0	0.682028	1	1	1
biological_process	GO:0000460	maturation of 5.8S rRNA	0	11	0	0.0646806	0.97383	1	1
biological_process	GO:0042256	mature ribosome assembly	0	6	0	0.317064	1	1	1
biological_process	GO:0000054	ribosomal subunit export from nucleus	0	6	0	0.16334	0.947985	1	1
biological_process	GO:0006482	protein demethylation	0	2	0	0.682028	1	1	1
biological_process	GO:0009092	homoserine metabolic process	0	3	0	0.068358	1	1	1
biological_process	GO:0009088	threonine biosynthetic process	0	5	0	0.38401	1	1	1
biological_process	GO:0045787	positive regulation of cell cycle	0	1	0	0.994641	0.0155382	1	1
biological_process	GO:0017183	peptidyl-diphthamide biosynthetic process from peptidyl-histidine	0	8	0	0.216117	1	1	1
biological_process	GO:0030490	maturation of SSU-rRNA	0	14	0	0.0904846	0.956329	1	1
biological_process	GO:0051668	localization within membrane	0	2	0	0.539885	0.558989	1	1
biological_process	GO:0016126	sterol biosynthetic process	0	16	0	0.0562677	0.985846	1	1
biological_process	GO:0051170	import into nucleus	0	1	0	0.961421	0.0787932	1	1
biological_process	GO:0006501	C-terminal protein lipidation	0	4	0	0.46507	1	1	1
biological_process	GO:0019615	catechol catabolic process, ortho-cleavage	0	1	0	0.825871	1	1	1
biological_process	GO:0019614	catechol-containing compound catabolic process	0	1	0	0.825871	1	1	1
biological_process	GO:0009712	catechol-containing compound metabolic process	0	2	0	0.563211	1	1	1
biological_process	GO:0016104	triterpenoid biosynthetic process	0	1	0	0.825871	1	1	1
biological_process	GO:0015677	copper ion import	0	16	0	0.0465567	1	1	1
biological_process	GO:0006825	copper ion transport	0	3	0	0.0261581	1	0.998	1
biological_process	GO:0034227	tRNA thio-modification	0	2	0	0.261775	1	1	1
biological_process	GO:0006865	amino acid transport	0	4	0	0.385698	0.754921	1	1
biological_process	GO:0015817	histidine transport	0	1	0	0.825871	1	1	1
biological_process	GO:0006828	manganese ion transport	0	2	0	0.563211	1	1	1
biological_process	GO:0015805	S-adenosyl-L-methionine transport	0	1	0	0.825871	1	1	1
biological_process	GO:0006783	heme biosynthetic process	0	9	0	0.068358	1	1	1
biological_process	GO:0006782	protoporphyrinogen IX biosynthetic process	0	7	0	0.261775	1	1	1
biological_process	GO:0032366	intracellular sterol transport	0	2	0	0.682028	1	1	1
biological_process	GO:0097036	regulation of plasma membrane sterol distribution	0	1	0	0.825871	1	1	1
biological_process	GO:0006665	sphingolipid metabolic process	0	7	0	0.00366654	0.999624	0.558	1
biological_process	GO:0016125	sterol metabolic process	0	4	0	0.0367788	0.99143	1	1
biological_process	GO:0033615	mitochondrial proton-transporting ATP synthase complex assembly	0	8	0	0.216117	1	1	1
biological_process	GO:0097053	L-kynurenine catabolic process	0	1	0	0.825871	1	1	1
biological_process	GO:0019441	tryptophan catabolic process to kynurenine	0	3	0	0.563211	1	1	1
biological_process	GO:0051973	positive regulation of telomerase activity	0	2	0	0.682028	1	1	1
biological_process	GO:0032203	telomere formation via telomerase	0	1	0	0.825871	1	1	1
biological_process	GO:0070681	glutaminyl-tRNAGln biosynthesis via transamidation	0	3	0	0.563211	1	1	1
biological_process	GO:0140469	GCN2-mediated signaling	0	3	0	0.563211	1	1	1
biological_process	GO:1903138	negative regulation of cell wall integrity MAPK cascade	0	1	0	0.825871	1	1	1
biological_process	GO:1903753	negative regulation of p38MAPK cascade	0	1	0	0.825871	1	1	1
biological_process	GO:2001125	negative regulation of translational frameshifting	0	1	0	0.825871	1	1	1
biological_process	GO:0010508	positive regulation of autophagy	0	8	0	0.100348	1	1	1
biological_process	GO:2000765	regulation of cytoplasmic translation	0	1	0	0.38401	1	1	1
biological_process	GO:0071470	cellular response to osmotic stress	0	12	0	0.0832458	0.98531	1	1
biological_process	GO:0006973	intracellular accumulation of glycerol	0	1	0	0.825871	1	1	1
biological_process	GO:1900444	negative regulation of filamentous growth of a population of unicellular organisms in response to biotic stimulus	0	2	0	0.682028	1	1	1
biological_process	GO:1900432	negative regulation of filamentous growth of a population of unicellular organisms in response to heat	0	3	0	0.563211	1	1	1
biological_process	GO:0046173	polyol biosynthetic process	0	1	0	0.204294	0.953443	1	1
biological_process	GO:0009636	response to toxic substance	0	6	0	0.00154801	0.999857	0.283	1
biological_process	GO:0051403	stress-activated MAPK cascade	0	2	0	0.458613	0.85272	1	1
biological_process	GO:0001678	cellular glucose homeostasis	0	4	0	0.310629	0.917175	1	1
biological_process	GO:0051156	glucose 6-phosphate metabolic process	0	5	0	0.0828248	1	1	1
biological_process	GO:0019318	hexose metabolic process	0	2	0	0.885529	0.203606	1	1
biological_process	GO:0019344	cysteine biosynthetic process	0	4	0	0.178413	1	1	1
biological_process	GO:0070814	hydrogen sulfide biosynthetic process	0	3	0	0.46507	1	1	1
biological_process	GO:0009086	methionine biosynthetic process	0	10	0	0.038419	1	1	1
biological_process	GO:0010134	sulfate assimilation via adenylyl sulfate reduction	0	1	0	0.825871	1	1	1
biological_process	GO:0019379	sulfate assimilation, phosphoadenylyl sulfate reduction by phosphoadenylyl-sulfate reductase (thioredoxin)	0	3	0	0.563211	1	1	1
biological_process	GO:0006120	mitochondrial electron transport, NADH to ubiquinone	0	13	0	0.0828248	1	1	1
biological_process	GO:0006032	chitin catabolic process	0	4	0	0.46507	1	1	1
biological_process	GO:0034247	snoRNA splicing	0	2	0	0.682028	1	1	1
biological_process	GO:0045337	farnesyl diphosphate biosynthetic process	0	2	0	0.789306	0.61599	1	1
biological_process	GO:0006265	DNA topological change	0	8	0	0.216117	1	1	1
biological_process	GO:2001034	positive regulation of double-strand break repair via nonhomologous end joining	0	1	0	0.825871	1	1	1
biological_process	GO:0070550	rDNA condensation	0	4	0	0.46507	1	1	1
biological_process	GO:0006356	regulation of transcription by RNA polymerase I	0	5	0	0.599334	0.689371	1	1
biological_process	GO:0001174	transcriptional start site selection at RNA polymerase II promoter	0	3	0	0.563211	1	1	1
biological_process	GO:0006021	inositol biosynthetic process	0	1	0	0.825871	1	1	1
biological_process	GO:0030497	fatty acid elongation	0	4	0	0.261775	1	1	1
biological_process	GO:0019509	L-methionine salvage from methylthioadenosine	0	5	0	0.38401	1	1	1
biological_process	GO:0019284	L-methionine salvage from S-adenosylmethionine	0	3	0	0.563211	1	1	1
biological_process	GO:0019858	cytosine metabolic process	0	1	0	0.825871	1	1	1
biological_process	GO:1905268	negative regulation of chromatin organization	0	1	0	0.94486	0.195884	1	1
biological_process	GO:0060968	obsolete regulation of gene silencing	0	3	0	0.563211	1	1	1
biological_process	GO:0009116	nucleoside metabolic process	0	10	0	0.450546	0.764314	1	1
biological_process	GO:0015858	nucleoside transport	0	2	0	0.682028	1	1	1
biological_process	GO:0034551	mitochondrial respiratory chain complex III assembly	0	6	0	0.317064	1	1	1
biological_process	GO:0002253	activation of immune response	0	2	0	0.563211	1	1	1
biological_process	GO:0006388	tRNA splicing, via endonucleolytic cleavage and ligation	0	4	0	0.581384	0.783883	1	1
biological_process	GO:0009298	GDP-mannose biosynthetic process	0	3	0	0.563211	1	1	1
biological_process	GO:0048311	mitochondrion distribution	0	1	0	0.822562	0.400666	1	1
biological_process	GO:0006033	chitin localization	0	2	0	0.682028	1	1	1
biological_process	GO:0070583	spore membrane bending pathway	0	1	0	0.825871	1	1	1
biological_process	GO:0034221	fungal-type cell wall chitin biosynthetic process	0	4	0	0.46507	1	1	1
biological_process	GO:0051223	regulation of protein transport	0	1	0	0.742896	0.499419	1	1
biological_process	GO:0018013	N-terminal peptidyl-glycine methylation	0	1	0	0.825871	1	1	1
biological_process	GO:0018027	peptidyl-lysine dimethylation	0	3	0	0.563211	1	1	1
biological_process	GO:0019287	isopentenyl diphosphate biosynthetic process, mevalonate pathway	0	3	0	0.38401	1	1	1
biological_process	GO:0015903	fluconazole transport	0	2	0	0.682028	1	1	1
biological_process	GO:0015833	peptide transport	0	2	0	0.204294	0.953443	1	1
biological_process	GO:0015848	spermidine transport	0	3	0	0.563211	1	1	1
biological_process	GO:0000338	protein deneddylation	0	3	0	0.563211	1	1	1
biological_process	GO:0052391	induction by symbiont of defense-related host calcium ion flux	0	4	0	0.46507	1	1	1
biological_process	GO:0019538	protein metabolic process	0	4	0	0.146095	0.874512	1	1
biological_process	GO:0006465	signal peptide processing	0	13	0	0.0828248	1	1	1
biological_process	GO:0006807	nitrogen compound metabolic process	0	10	0	0.987808	0.0150691	1	1
biological_process	GO:0030163	protein catabolic process	0	6	0	0.641859	0.428179	1	1
biological_process	GO:0031297	replication fork processing	0	5	0	0.121573	1	1	1
biological_process	GO:0000712	resolution of meiotic recombination intermediates	0	8	0	0.216117	1	1	1
biological_process	GO:0042773	ATP synthesis coupled electron transport	0	2	0	0.000173539	1	0.037	1
biological_process	GO:0006284	base-excision repair	0	6	0	0.310629	0.917175	1	1
biological_process	GO:0043137	DNA replication, removal of RNA primer	0	6	0	0.317064	1	1	1
biological_process	GO:0006307	DNA dealkylation involved in DNA repair	0	3	0	0.563211	1	1	1
biological_process	GO:0002188	translation reinitiation	0	3	0	0.563211	1	1	1
biological_process	GO:0008652	cellular amino acid biosynthetic process	0	9	0	7.25429e-06	0.999999	0.001	1
biological_process	GO:0046855	inositol phosphate dephosphorylation	0	6	0	0.261775	1	1	1
biological_process	GO:0000103	sulfate assimilation	0	5	0	0.261775	1	1	1
biological_process	GO:0006177	GMP biosynthetic process	0	2	0	0.563211	1	1	1
biological_process	GO:0046037	GMP metabolic process	0	1	0	0.563211	1	1	1
biological_process	GO:0033577	protein glycosylation in endoplasmic reticulum	0	1	0	0.825871	1	1	1
biological_process	GO:0042744	hydrogen peroxide catabolic process	0	6	0	0.317064	1	1	1
biological_process	GO:0000302	response to reactive oxygen species	0	2	0	0.113093	0.978417	1	1
biological_process	GO:0009073	aromatic amino acid family biosynthetic process	0	7	0	0.17676	0.961581	1	1
biological_process	GO:0009423	chorismate biosynthetic process	0	3	0	0.563211	1	1	1
biological_process	GO:0000495	box H/ACA RNA 3'-end processing	0	1	0	0.825871	1	1	1
biological_process	GO:0031118	rRNA pseudouridine synthesis	0	3	0	0.216117	1	1	1
biological_process	GO:0006226	dUMP biosynthetic process	0	2	0	0.682028	1	1	1
biological_process	GO:0046081	dUTP catabolic process	0	1	0	0.825871	1	1	1
biological_process	GO:1990619	histone H3-K9 deacetylation	0	1	0	0.825871	1	1	1
biological_process	GO:0031508	pericentric heterochromatin assembly	0	1	0	0.682028	1	1	1
biological_process	GO:0006122	mitochondrial electron transport, ubiquinol to cytochrome c	0	12	0	0.100348	1	1	1
biological_process	GO:0006679	glucosylceramide biosynthetic process	0	3	0	0.563211	1	1	1
biological_process	GO:0016052	carbohydrate catabolic process	0	2	0	0.000649319	0.999908	0.128	1
biological_process	GO:0098507	polynucleotide 5' dephosphorylation	0	1	0	0.825871	1	1	1
biological_process	GO:0046513	ceramide biosynthetic process	0	8	0	0.100348	1	1	1
biological_process	GO:0046512	sphingosine biosynthetic process	0	5	0	0.38401	1	1	1
biological_process	GO:0000464	endonucleolytic cleavage in ITS1 upstream of 5.8S rRNA from tricistronic rRNA transcript (SSU-rRNA, 5.8S rRNA, LSU-rRNA)	0	3	0	0.563211	1	1	1
biological_process	GO:1990120	messenger ribonucleoprotein complex assembly	0	1	0	0.825871	1	1	1
biological_process	GO:0001407	glycerophosphodiester transmembrane transport	0	3	0	0.563211	1	1	1
biological_process	GO:0046942	carboxylic acid transport	0	3	0	0.207179	0.915005	1	1
biological_process	GO:0045727	positive regulation of translation	0	5	0	0.031702	1	1	1
biological_process	GO:0009438	methylglyoxal metabolic process	0	1	0	0.682028	1	1	1
biological_process	GO:0006090	pyruvate metabolic process	0	3	0	0.00462697	1	0.659	1
biological_process	GO:0070525	tRNA threonylcarbamoyladenosine metabolic process	0	2	0	0.14728	1	1	1
biological_process	GO:0052155	modulation by symbiont of host cell-mediated immune response	0	2	0	0.682028	1	1	1
biological_process	GO:0045338	farnesyl diphosphate metabolic process	0	1	0	0.718744	0.682936	1	1
biological_process	GO:0071894	histone H2B conserved C-terminal lysine ubiquitination	0	2	0	0.919663	0.436789	1	1
biological_process	GO:0010390	histone monoubiquitination	0	2	0	0.682028	1	1	1
biological_process	GO:1990758	mitotic sister chromatid biorientation	0	3	0	0.789306	0.61599	1	1
biological_process	GO:0031023	microtubule organizing center organization	0	1	0	0.404346	0.878427	1	1
biological_process	GO:0051012	microtubule sliding	0	1	0	0.825871	1	1	1
biological_process	GO:0051312	chromosome decondensation	0	1	0	0.825871	1	1	1
biological_process	GO:1902499	positive regulation of protein autoubiquitination	0	1	0	0.825871	1	1	1
biological_process	GO:0060261	positive regulation of transcription initiation from RNA polymerase II promoter	0	3	0	0.404346	0.878427	1	1
biological_process	GO:0046677	response to antibiotic	0	2	0	0.682028	1	1	1
biological_process	GO:0046898	response to cycloheximide	0	2	0	0.563211	1	1	1
biological_process	GO:1990577	C-terminal protein demethylation	0	1	0	0.825871	1	1	1
biological_process	GO:0051383	kinetochore organization	0	1	0	0.851031	0.418616	1	1
biological_process	GO:0045132	meiotic chromosome segregation	0	3	0	0.967739	0.0761317	1	1
biological_process	GO:0015936	coenzyme A metabolic process	0	1	0	0.851031	0.418616	1	1
biological_process	GO:0033567	DNA replication, Okazaki fragment processing	0	2	0	0.563211	1	1	1
biological_process	GO:0007535	donor selection	0	2	0	0.682028	1	1	1
biological_process	GO:0045003	double-strand break repair via synthesis-dependent strand annealing	0	2	0	0.581384	0.783883	1	1
biological_process	GO:0060543	negative regulation of strand invasion	0	1	0	0.825871	1	1	1
biological_process	GO:0071932	replication fork reversal	0	2	0	0.682028	1	1	1
biological_process	GO:0010043	response to zinc ion	0	1	0	0.682028	1	1	1
biological_process	GO:0002949	tRNA threonylcarbamoyladenosine modification	0	3	0	0.46507	1	1	1
biological_process	GO:0006555	methionine metabolic process	0	3	0	0.031702	1	1	1
biological_process	GO:0018008	N-terminal peptidyl-glycine N-myristoylation	0	1	0	0.825871	1	1	1
biological_process	GO:0044001	migration in host	0	1	0	0.825871	1	1	1
biological_process	GO:0140053	mitochondrial gene expression	0	1	0	0.000381021	0.99997	0.085	1
biological_process	GO:0048255	mRNA stabilization	0	1	0	0.969713	0.317972	1	1
biological_process	GO:0006433	prolyl-tRNA aminoacylation	0	3	0	0.563211	1	1	1
biological_process	GO:0019853	L-ascorbic acid biosynthetic process	0	1	0	0.825871	1	1	1
biological_process	GO:0030308	negative regulation of cell growth	0	2	0	0.930429	0.281256	1	1
biological_process	GO:0019448	L-cysteine catabolic process	0	3	0	0.563211	1	1	1
biological_process	GO:0019451	L-cysteine catabolic process to pyruvate, using cysteine dioxygenase	0	1	0	0.825871	1	1	1
biological_process	GO:0006414	translational elongation	0	12	0	0.0101369	0.998801	0.893	1
biological_process	GO:0018171	peptidyl-cysteine oxidation	0	1	0	0.825871	1	1	1
biological_process	GO:0061407	positive regulation of transcription from RNA polymerase II promoter in response to hydrogen peroxide	0	1	0	0.825871	1	1	1
biological_process	GO:0061077	chaperone-mediated protein folding	0	5	0	0.185012	0.939079	1	1
biological_process	GO:1901710	regulation of homoserine biosynthetic process	0	1	0	0.825871	1	1	1
biological_process	GO:0006073	cellular glucan metabolic process	0	4	0	0.936196	0.127118	1	1
biological_process	GO:0009251	glucan catabolic process	0	6	0	0.178413	1	1	1
biological_process	GO:1900039	positive regulation of cellular response to hypoxia	0	1	0	0.825871	1	1	1
biological_process	GO:2000640	positive regulation of SREBP signaling pathway	0	1	0	0.825871	1	1	1
biological_process	GO:0006183	GTP biosynthetic process	0	2	0	0.682028	1	1	1
biological_process	GO:0043409	negative regulation of MAPK cascade	0	3	0	0.46507	1	1	1
biological_process	GO:0090029	negative regulation of pheromone-dependent signal transduction involved in conjugation with cellular fusion	0	1	0	0.825871	1	1	1
biological_process	GO:0034198	cellular response to amino acid starvation	0	10	0	0.100348	1	1	1
biological_process	GO:2000785	regulation of autophagosome assembly	0	2	0	0.563211	1	1	1
biological_process	GO:1902983	DNA strand elongation involved in mitotic DNA replication	0	1	0	0.563211	1	1	1
biological_process	GO:0009187	cyclic nucleotide metabolic process	0	1	0	0.563211	1	1	1
biological_process	GO:0031138	negative regulation of conjugation with cellular fusion	0	2	0	0.789306	0.61599	1	1
biological_process	GO:0015693	magnesium ion transport	0	3	0	0.46507	1	1	1
biological_process	GO:0045016	mitochondrial magnesium ion transmembrane transport	0	2	0	0.563211	1	1	1
biological_process	GO:0110051	metabolite repair	0	1	0	0.825871	1	1	1
biological_process	GO:0046496	nicotinamide nucleotide metabolic process	0	2	0	0.131492	0.973842	1	1
[truncated: 3,970 more rows]
[truncated: 196 more columns]

## Sheet: polyQ⁄N
GO domain	GO ID	GO term	polyQ⁄N protein	total number	number / total	raw p-value under-representation	raw p-value over-representation	FWER under-representation	FWER over-representation	Gene Name
[truncated: 5,243 more rows]
[truncated: 411 more columns]

[truncated: 19 more sheets: polyN, polyY, polyW, polyC, polyP, polyA, polyS, polyT, polyD, polyE, polyG, polyF, polyH, polyI, polyL, polyV, polyM, polyR, polyK]
