# Supplementary material for: Noncanonical usage of stop codons in ciliates expands proteins with Q-rich motifs
Source: bioRxiv preprint, doi:10.1101/2020.12.08.407247, version 3 (2023-11-13)
Supplement: Dataset DS12 [file 407247_file26.xlsx]

## Sheet: SCD
GO domain	GO ID	GO term	SCD protein	total number	number / total	raw p-value under-representation	raw p-value over-representation	FWER under-representation	FWER over-representation	Gene Name
cellular_component	GO:0016021	integral component of membrane	256	2094	0.122254	3.54463e-11	1	0	1	CHO2_MAGO7	PLPL_MAGO7	PALH_MAGO7	NTE1_MAGO7	GMT_MAGO7	ABC7_MAGO7	G4N935_MAGO7	G4N5I5_MAGO7	G4NC14_MAGO7	G4NLU7_MAGO7	G4MXE7_MAGO7	G4MY44_MAGO7	G4NCX8_MAGO7	G4MWL8_MAGO7	G4N8N4_MAGO7	G4MKC4_MAGO7	G4MZA7_MAGO7	G4N8S9_MAGO7	G4MMS5_MAGO7	G5EH51_MAGO7	G4MXA9_MAGO7	G5EHP2_MAGO7	G5EH28_MAGO7	G5EI65_MAGO7	G5EHV5_MAGO7	Q2KEQ5_MAGO7	G4NKQ7_MAGO7	G5EHV1_MAGO7	G4N9N0_MAGO7	G4MRI5_MAGO7	G4MYL9_MAGO7	G4NGA1_MAGO7	G4MNH4_MAGO7	G4NBC4_MAGO7	G4MMX1_MAGO7	G4NIB5_MAGO7	G4MP21_MAGO7	G4N1Q5_MAGO7	G4MNG8_MAGO7	G4MQ05_MAGO7
cellular_component	GO:0005634	nucleus	195	691	0.2822	1	3.05864e-17	1	0	SSN3_MAGO7	STE20_MAGO7	MST12_MAGO7	NUT1_MAGO7	MIG1_MAGO7	SDS23_MAGO7	STUA_MAGO7	XLNR_MAGO7	XPOT_MAGO7	YPI1_MAGO7	TRF2_MAGO7	G4N744_MAGO7	G4NCF8_MAGO7	G4N9X0_MAGO7	G5EHY7_MAGO7	G5EH81_MAGO7	G5EH28_MAGO7	G5EI02_MAGO7	Q2KEQ5_MAGO7	G5EHS1_MAGO7	G4NE59_MAGO7	G4NFL5_MAGO7	G4N0U1_MAGO7	G4N4Y2_MAGO7	G4MNF4_MAGO7	G4N6Q0_MAGO7	G4NL37_MAGO7	G4N5Y8_MAGO7	G4NH28_MAGO7	G4MTP5_MAGO7	G4MYW3_MAGO7	G4MVW4_MAGO7	G4MVM3_MAGO7	G4MP21_MAGO7	A0A151V4P5_MAGO7	G4MRZ8_MAGO7	G4MK85_MAGO7	G4N4R4_MAGO7	A0A151V4J7_MAGO7	G4MKK5_MAGO7
molecular_function	GO:0005524	ATP binding	155	615	0.252033	1	9.36769e-10	1	0	SSN3_MAGO7	STE20_MAGO7	MAK5_MAGO7	DED1_MAGO7	GET3_MAGO7	MCK1_MAGO7	INO80_MAGO7	MYO1_MAGO7	DRS1_MAGO7	ABC7_MAGO7	DCL1_MAGO7	G4N5A1_MAGO7	G4MUX8_MAGO7	G4N2M4_MAGO7	G4MNZ0_MAGO7	G5EI59_MAGO7	G5EHL3_MAGO7	G5EH72_MAGO7	G4NIT3_MAGO7	G4N9N0_MAGO7	G4MQ04_MAGO7	G4MQC2_MAGO7	G4MN86_MAGO7	G4MTP5_MAGO7	G4MVM3_MAGO7	G4MMX1_MAGO7	G4N7L8_MAGO7	G4N1E5_MAGO7	G4NDU5_MAGO7	G4MK85_MAGO7	G4MKN9_MAGO7	G4MUS5_MAGO7	G4NAF3_MAGO7	G4MR96_MAGO7	G4N811_MAGO7	G4N506_MAGO7	G4NGP6_MAGO7	G4MWY5_MAGO7	G4MTT5_MAGO7	G4MMS0_MAGO7
molecular_function	GO:0008270	zinc ion binding	113	378	0.298942	1	5.19236e-12	1	0	NUT1_MAGO7	SEC24_MAGO7	XLNR_MAGO7	G5EH28_MAGO7	Q2KEQ5_MAGO7	G4NAH8_MAGO7	G4NFL5_MAGO7	G4N4Y2_MAGO7	G4NB96_MAGO7	G4N5Y8_MAGO7	G4MVW4_MAGO7	G4MP21_MAGO7	A0A151V4P5_MAGO7	G4N4R4_MAGO7	A0A151V4J7_MAGO7	G4N853_MAGO7	G4MT18_MAGO7	G4MWM8_MAGO7	G4MRL5_MAGO7	G4MPD7_MAGO7	G4MWP4_MAGO7	G4MPL8_MAGO7	G4MNN4_MAGO7	G4MW89_MAGO7	G4N2N3_MAGO7	G4ND47_MAGO7	G4N8L3_MAGO7	G4N532_MAGO7	G4N224_MAGO7	G4MVA4_MAGO7	G4MSF2_MAGO7	G4N6T1_MAGO7	G4NIQ8_MAGO7	G4MM20_MAGO7	G4MPR7_MAGO7	G4MM49_MAGO7	G4N8I4_MAGO7	G4MVN0_MAGO7	G4NI99_MAGO7	G4NJQ2_MAGO7
molecular_function	GO:0003677	DNA binding	78	255	0.305882	1	4.90626e-12	1	0	SWI6_MAGO7	STUA_MAGO7	INO80_MAGO7	XLNR_MAGO7	TRF2_MAGO7	DCL1_MAGO7	G4N977_MAGO7	G5EH28_MAGO7	G5EI02_MAGO7	Q2KEQ5_MAGO7	G4NFL5_MAGO7	G4N0U1_MAGO7	G4MQC2_MAGO7	G4NL37_MAGO7	G4N5Y8_MAGO7	G4NH28_MAGO7	G4MVW4_MAGO7	G4MP21_MAGO7	G4NG87_MAGO7	G4MK85_MAGO7	A0A151V4J7_MAGO7	G4MRH6_MAGO7	G4MWM8_MAGO7	G4N811_MAGO7	G4NE19_MAGO7	G4MW89_MAGO7	G4N2N3_MAGO7	G4MR69_MAGO7	G4N5D1_MAGO7	G4MNW7_MAGO7	G4ND47_MAGO7	G4MU89_MAGO7	G4N6T1_MAGO7	G4N8I4_MAGO7	G4MVN0_MAGO7	G4NI99_MAGO7	G4MU09_MAGO7	G4MWP0_MAGO7	G4MT25_MAGO7	G4NF77_MAGO7
molecular_function	GO:0046872	metal ion binding	76	459	0.165577	0.999894	0.00014934	1	0.027	SSN3_MAGO7	GET3_MAGO7	MST12_MAGO7	KATG2_MAGO7	NPIIA_MAGO7	LAP1_MAGO7	DCL1_MAGO7	G5EI22_MAGO7	G4NE59_MAGO7	G4N6Q0_MAGO7	G4NL37_MAGO7	G4MTE2_MAGO7	G4MNG8_MAGO7	G4NDI1_MAGO7	G4MK85_MAGO7	G4MPD2_MAGO7	G4MKK5_MAGO7	G4N1B0_MAGO7	G4N839_MAGO7	G4MWF4_MAGO7	G4MT73_MAGO7	G4NE19_MAGO7	G4MSE7_MAGO7	G4MVM5_MAGO7	G4MKI7_MAGO7	G4ND35_MAGO7	A0A151V4M6_MAGO7	G4N9F6_MAGO7	G4MV74_MAGO7	G4MKP3_MAGO7	G4N6N3_MAGO7	G4NA39_MAGO7	G4MW52_MAGO7	G4NB58_MAGO7	G4N456_MAGO7	G4MT81_MAGO7	G4N2L8_MAGO7	G4N797_MAGO7	G4NAX5_MAGO7	G4NHP0_MAGO7
molecular_function	GO:0000981	DNA-binding transcription factor activity, RNA polymerase II-specific	70	189	0.37037	1	2.11399e-12	1	0	XLNR_MAGO7	TRF2_MAGO7	G5EH28_MAGO7	G5EI02_MAGO7	Q2KEQ5_MAGO7	G4NFL5_MAGO7	G4N5Y8_MAGO7	G4MVW4_MAGO7	G4MP21_MAGO7	A0A151V4P5_MAGO7	G4N4R4_MAGO7	A0A151V4J7_MAGO7	G4N853_MAGO7	G4MT18_MAGO7	G4MWM8_MAGO7	G4MWP4_MAGO7	G4MNN4_MAGO7	G4MW89_MAGO7	G4N8L3_MAGO7	G4N532_MAGO7	G4N224_MAGO7	G4MVA4_MAGO7	G4N6T1_MAGO7	G4NIQ8_MAGO7	G4MPR7_MAGO7	G4MM49_MAGO7	G4N8I4_MAGO7	G4MVN0_MAGO7	G4NI99_MAGO7	G4NKQ8_MAGO7	G4N1J2_MAGO7	G4MWP0_MAGO7	G4MT25_MAGO7	G4N3N6_MAGO7	G4MPR8_MAGO7	G4N6I1_MAGO7	G4NF77_MAGO7	G4NEI3_MAGO7	G4NBS6_MAGO7	G4MT41_MAGO7
cellular_component	GO:0005737	cytoplasm	58	365	0.158904	0.0260604	0.978863	0.702	1	STE20_MAGO7	DED1_MAGO7	NST1_MAGO7	SDS23_MAGO7	XPOT_MAGO7	MDM34_MAGO7	ACE1_MAGO7	G4MUI6_MAGO7	G4MT59_MAGO7	G4N9G9_MAGO7	G5EI56_MAGO7	G4N7I3_MAGO7	G4MZ62_MAGO7	G4NDI0_MAGO7	G4NLR5_MAGO7	G4NI33_MAGO7	G4MUU2_MAGO7	G4MSE7_MAGO7	G4MUA9_MAGO7	G4MQR2_MAGO7	G4ND47_MAGO7	G4ND35_MAGO7	G4N4T4_MAGO7	G4MQ98_MAGO7	G4MPR9_MAGO7	G4MRY9_MAGO7	G4MSJ0_MAGO7	G4MYK3_MAGO7	G4MU11_MAGO7	G4MR46_MAGO7	G4MZI8_MAGO7	G4NBY3_MAGO7	G4MYP6_MAGO7	G4ND41_MAGO7	G4NFR7_MAGO7	G4MTA9_MAGO7	G4MW88_MAGO7	G4NF52_MAGO7	G4NLV9_MAGO7	G4MML8_MAGO7
molecular_function	GO:0016787	hydrolase activity	43	196	0.219388	0.851028	0.170592	1	1	MYO1_MAGO7	G5EHV6_MAGO7	G4N6Q0_MAGO7	G4N8M7_MAGO7	G4N4I6_MAGO7	G4N4S3_MAGO7	G4MR96_MAGO7	G4MP38_MAGO7	G4ND47_MAGO7	G4NFJ0_MAGO7	G4MXN4_MAGO7	G4NBZ1_MAGO7	G4MZE4_MAGO7	G4N557_MAGO7	G4MSV2_MAGO7	G4MT81_MAGO7	G4NH56_MAGO7	G4MT72_MAGO7	G4NC27_MAGO7	G4ML29_MAGO7	G4NEV5_MAGO7	G4MRJ6_MAGO7	G4N9X9_MAGO7	G4MKK9_MAGO7	A0A151V4I4_MAGO7	G4MZD9_MAGO7	G4NFC3_MAGO7	G4MZR9_MAGO7	G4MZK0_MAGO7	G4MTU4_MAGO7	G4N1L6_MAGO7	G4N3Z7_MAGO7	G4N5I6_MAGO7	G4NGS5_MAGO7	G4MP79_MAGO7	G4N5C9_MAGO7	G4MQD1_MAGO7	G4NJG4_MAGO7	G4N8M0_MAGO7	G4NDC7_MAGO7
molecular_function	GO:0003723	RNA binding	33	182	0.181319	0.211485	0.829935	1	1	MAK5_MAGO7	YME2_MAGO7	DRS1_MAGO7	DCL1_MAGO7	G4N7I3_MAGO7	G4NDF6_MAGO7	G4N0F2_MAGO7	G4MP44_MAGO7	G4MT73_MAGO7	G4N6H0_MAGO7	G4MRQ6_MAGO7	G4N6Z8_MAGO7	G4N6C6_MAGO7	G4ND47_MAGO7	G4MVR2_MAGO7	G4MQW9_MAGO7	G4MVL2_MAGO7	G4MNW4_MAGO7	G4NH56_MAGO7	G4N540_MAGO7	G4MTA9_MAGO7	G4N5I8_MAGO7	G4MYM6_MAGO7	G4MT27_MAGO7	G4N7J9_MAGO7	G4MS40_MAGO7	G4MU06_MAGO7	A0A151V4I4_MAGO7	G4NJ50_MAGO7	G4N8S8_MAGO7	G4MV21_MAGO7	G4MPG6_MAGO7	G4N847_MAGO7
biological_process	GO:0006351	transcription, DNA-templated	33	103	0.320388	0.999998	4.29218e-06	1	0.001	INO80_MAGO7	XLNR_MAGO7	G5EH28_MAGO7	Q2KEQ5_MAGO7	G4NFL5_MAGO7	G4N5Y8_MAGO7	G4MVW4_MAGO7	G4MP21_MAGO7	A0A151V4J7_MAGO7	G4MWF4_MAGO7	G4MWM8_MAGO7	G4MW89_MAGO7	G4N2N3_MAGO7	G4N6T1_MAGO7	G4N8I4_MAGO7	G4MVN0_MAGO7	G4NI99_MAGO7	G4MWP0_MAGO7	G4MT25_MAGO7	G4NF77_MAGO7	G4NIV0_MAGO7	G4MRM4_MAGO7	G4N111_MAGO7	G4N7V2_MAGO7	G4MZX6_MAGO7	G4MKH9_MAGO7	G4NJP4_MAGO7	G4MWV1_MAGO7	G4NBX7_MAGO7	G4MQD1_MAGO7	G4NCV0_MAGO7	G4MP35_MAGO7	G4MVQ7_MAGO7
molecular_function	GO:0003676	nucleic acid binding	33	121	0.272727	1	1.51271e-08	1	0	G5EHH5_MAGO7	G4NB96_MAGO7	G4N4E2_MAGO7	G4MR96_MAGO7	G4MPL8_MAGO7	G4MP38_MAGO7	G4NFJ0_MAGO7	G4MM13_MAGO7	G4MM20_MAGO7	G4MZE4_MAGO7	G4N557_MAGO7	G4NJQ2_MAGO7	G4MM21_MAGO7	G4MUL7_MAGO7	G4NG99_MAGO7	G4N9X9_MAGO7	G4NF35_MAGO7	G4MZR9_MAGO7	G4MMN6_MAGO7	G4MWR3_MAGO7	G4MY79_MAGO7	G4MTU4_MAGO7	G4NBU3_MAGO7	G4N4M9_MAGO7	G4N3Z7_MAGO7	G4NGS5_MAGO7	G4N594_MAGO7	G4NE81_MAGO7	G4N6B1_MAGO7	G4MM32_MAGO7	G4N9J3_MAGO7	G4MS27_MAGO7	G4MS05_MAGO7
molecular_function	GO:0016491	oxidoreductase activity	32	340	0.0941176	9.0866e-12	1	0	1	NEC1_MAGO7	ACE1_MAGO7	G4MZ93_MAGO7	G4MXP1_MAGO7	G5EGX4_MAGO7	G5EH83_MAGO7	G5EGV1_MAGO7	G5EHG8_MAGO7	G5EH93_MAGO7	G4MYF3_MAGO7	G4MR69_MAGO7	G4N154_MAGO7	G4NHJ8_MAGO7	G4NAH7_MAGO7	A0A151V4M6_MAGO7	G4NJB8_MAGO7	G4N419_MAGO7	G4NHK7_MAGO7	G4NB73_MAGO7	G4MWD1_MAGO7	G4MLT2_MAGO7	G4MWB5_MAGO7	G4NAG8_MAGO7	G4MMG8_MAGO7	G4ND85_MAGO7	G4N5T0_MAGO7	G4NG13_MAGO7	G4NHR0_MAGO7	G4N0V4_MAGO7	G4NDV1_MAGO7	G4N741_MAGO7	G4N8Z9_MAGO7
molecular_function	GO:0016887	ATP hydrolysis activity	31	150	0.206667	0.999999	1.05587e-06	1	0	MAK5_MAGO7	DED1_MAGO7	GET3_MAGO7	INO80_MAGO7	DRS1_MAGO7	G4NIT3_MAGO7	G4N7L8_MAGO7	G4MK85_MAGO7	G4MKN9_MAGO7	G4NAF3_MAGO7	G4NHA6_MAGO7	G4N8V4_MAGO7	G4MV74_MAGO7	G4N540_MAGO7	G4N433_MAGO7	G4N3K7_MAGO7	G4MTV9_MAGO7	G4MV84_MAGO7	G4NES4_MAGO7	G4N791_MAGO7	G4NAD8_MAGO7	G4N151_MAGO7	G4MT82_MAGO7	G4MVC9_MAGO7	G4NH61_MAGO7	G4N7L9_MAGO7	G4MMY8_MAGO7	G4NIX1_MAGO7	G4MQP3_MAGO7	G4MSX0_MAGO7	G5EHW4_MAGO7
biological_process	GO:0006281	DNA repair	25	72	0.347222	0.999989	2.44807e-05	1	0.01	INO80_MAGO7	G4MQC2_MAGO7	G4MTP5_MAGO7	G4MYW3_MAGO7	G4MVM3_MAGO7	G4MK85_MAGO7	G4NAF3_MAGO7	G4MRH6_MAGO7	G4NE19_MAGO7	G4MYA8_MAGO7	G4NGD9_MAGO7	G4MP38_MAGO7	G4MNW7_MAGO7	G4NAD6_MAGO7	G4MU89_MAGO7	G4MVT4_MAGO7	G4NJG7_MAGO7	G4MT81_MAGO7	G4MT45_MAGO7	G4N5P0_MAGO7	G4N1L6_MAGO7	G4NHG4_MAGO7	G4N594_MAGO7	G4NJG4_MAGO7	G4NCG5_MAGO7
biological_process	GO:0015031	protein transport	25	87	0.287356	0.999862	0.000255985	1	0.091	SEC31_MAGO7	ATG11_MAGO7	HSE1_MAGO7	ATG2_MAGO7	ATG16_MAGO7	G4MY96_MAGO7	G4N7B2_MAGO7	G4N599_MAGO7	G4NIZ2_MAGO7	G4NI52_MAGO7	G4MYF8_MAGO7	G4N4U4_MAGO7	G4MYF7_MAGO7	G4MT76_MAGO7	G4NIQ2_MAGO7	G4NIC8_MAGO7	G4NIB9_MAGO7	G4MRU4_MAGO7	G4MSW8_MAGO7	G4MNJ2_MAGO7	G4MTW8_MAGO7	G4MM04_MAGO7	G4NCT4_MAGO7	G4NGP7_MAGO7	G4MRH1_MAGO7
biological_process	GO:0005975	carbohydrate metabolic process	25	164	0.152439	0.0478085	0.966162	0.997	1	G4N4I6_MAGO7	G4MM51_MAGO7	G4NFA4_MAGO7	G4MR77_MAGO7	G4MKB1_MAGO7	G4MXN4_MAGO7	G4NKH8_MAGO7	G4NB58_MAGO7	G4MVJ0_MAGO7	G4NGC6_MAGO7	G4MT72_MAGO7	G4MYF0_MAGO7	G4MWM7_MAGO7	G4NJV6_MAGO7	G4N9D5_MAGO7	G4MZK0_MAGO7	G4N4F9_MAGO7	G4N8A6_MAGO7	G4N191_MAGO7	G4N899_MAGO7	G4NKC7_MAGO7	G4N4V2_MAGO7	G4NEV0_MAGO7	G4N5D8_MAGO7	G4NE47_MAGO7
molecular_function	GO:0003700	DNA-binding transcription factor activity	24	41	0.585366	1	1.00139e-19	1	0	MST12_MAGO7	NUT1_MAGO7	G4N5K0_MAGO7	G4MTR7_MAGO7	G4N4Y2_MAGO7	G4N0G9_MAGO7	G4MU09_MAGO7	G4N9G2_MAGO7	G4MV05_MAGO7	G4N8G7_MAGO7	G4N7G9_MAGO7	G4MX18_MAGO7	G4MUZ6_MAGO7	G4MW93_MAGO7	G4MWL1_MAGO7	G4MZM4_MAGO7	G4MSL1_MAGO7	G4NGX5_MAGO7	G4NE81_MAGO7	G4N9W1_MAGO7	G4N4C2_MAGO7	G4MNY4_MAGO7	G4N5K2_MAGO7	G4N6V5_MAGO7
cellular_component	GO:0005739	mitochondrion	23	154	0.149351	0.00166162	0.999009	0.063	1	UTP10_MAGO7	MDM34_MAGO7	G5EH81_MAGO7	G4NL37_MAGO7	G4MMX1_MAGO7	G4N0Y7_MAGO7	G4NBT5_MAGO7	G4MNV7_MAGO7	G4N6E9_MAGO7	G4N540_MAGO7	G4MTY0_MAGO7	G4NLQ3_MAGO7	G4N7H9_MAGO7	G4MXT0_MAGO7	G4N0K5_MAGO7	G4N0J8_MAGO7	G4N9X8_MAGO7	G4N7B4_MAGO7	G4NF59_MAGO7	G4NHG4_MAGO7	G4NEE2_MAGO7	G4N5K6_MAGO7	G4NCG5_MAGO7
cellular_component	GO:0005789	endoplasmic reticulum membrane	22	108	0.203704	0.610486	0.478914	1	1	SEC31_MAGO7	CHO2_MAGO7	SEC24_MAGO7	ATG2_MAGO7	NTE1_MAGO7	GMT_MAGO7	G4MXA9_MAGO7	G4MNG8_MAGO7	G4N7B0_MAGO7	G4NGR4_MAGO7	G4N2L8_MAGO7	G4MR41_MAGO7	G4MYF8_MAGO7	G4MQR3_MAGO7	G4MYF7_MAGO7	G4NIQ2_MAGO7	G4N7K4_MAGO7	G4MM04_MAGO7	G4N6C7_MAGO7	G4NGP7_MAGO7	G4MRH1_MAGO7	G4MR62_MAGO7
molecular_function	GO:0004672	protein kinase activity	22	66	0.333333	1	3.13071e-07	1	0	G4N5A1_MAGO7	G4MUX8_MAGO7	G4MNZ0_MAGO7	G5EI59_MAGO7	G5EHL3_MAGO7	G4MQ04_MAGO7	G4MN86_MAGO7	G4NDU5_MAGO7	G4MTT5_MAGO7	G4N7I0_MAGO7	G4NG88_MAGO7	G4NHW7_MAGO7	G4MMB0_MAGO7	G4MTX4_MAGO7	G4N7J5_MAGO7	G4N6V6_MAGO7	G4MTJ4_MAGO7	G4NKI8_MAGO7	G4NFR5_MAGO7	G4MK82_MAGO7	G4MTX5_MAGO7	G4N9S8_MAGO7
molecular_function	GO:0022857	transmembrane transporter activity	21	279	0.0752688	0.000157894	0.999907	0.01	1	G4NC14_MAGO7	G5EHP2_MAGO7	G4NKQ7_MAGO7	G4NIB5_MAGO7	G4NFC2_MAGO7	G4N8J4_MAGO7	G4NE87_MAGO7	G4MT23_MAGO7	G4MZS6_MAGO7	G4MTN3_MAGO7	G4N4A0_MAGO7	G4MPH4_MAGO7	G4MX64_MAGO7	G4N0E9_MAGO7	G4N0E1_MAGO7	G4NCC1_MAGO7	G4N8X6_MAGO7	G4MM48_MAGO7	G4NII6_MAGO7	G5EHW3_MAGO7	G4NCK8_MAGO7
molecular_function	GO:0020037	heme binding	18	170	0.105882	0.0222855	0.987615	0.831	1	KATG2_MAGO7	G5EHV5_MAGO7	G4NI06_MAGO7	G4MKJ7_MAGO7	G4MZ98_MAGO7	G4MKD7_MAGO7	G4N6N3_MAGO7	G4N797_MAGO7	G4N931_MAGO7	G4MZ08_MAGO7	G4MRL4_MAGO7	G4NG13_MAGO7	G4NG44_MAGO7	G4MX96_MAGO7	G4N1L7_MAGO7	G4MPE7_MAGO7	G4N2X9_MAGO7	Q2KET0_MAGO7
cellular_component	GO:0005576	extracellular region	17	147	0.115646	0.0300923	0.983143	0.789	1	CE12A_MAGO7	CE12C_MAGO7	KATG2_MAGO7	NPIIA_MAGO7	LAP1_MAGO7	G4N4I6_MAGO7	G4NDI0_MAGO7	G4MXN4_MAGO7	G4NHR4_MAGO7	G4NHM4_MAGO7	G4NIM7_MAGO7	G4NB63_MAGO7	G4MQV7_MAGO7	G4MKA3_MAGO7	G4N611_MAGO7	A0A151V4I2_MAGO7	G4MZV6_MAGO7
molecular_function	GO:0004674	protein serine/threonine kinase activity	17	53	0.320755	0.999928	0.000207939	1	0.033	G4MVM3_MAGO7	G4N1E5_MAGO7	G4MWY5_MAGO7	G4MMS0_MAGO7	G4N845_MAGO7	G4NJG7_MAGO7	G4MVT0_MAGO7	G4MKX6_MAGO7	G4MRS3_MAGO7	G4MYB0_MAGO7	G4N462_MAGO7	G4NCR0_MAGO7	G4N4D3_MAGO7	G4MY59_MAGO7	G4N6G2_MAGO7	G4NEM6_MAGO7	G4N688_MAGO7
biological_process	GO:0006886	intracellular protein transport	16	60	0.266667	0.988147	0.0198804	1	0.999	SEC24_MAGO7	G4N9X0_MAGO7	G4N839_MAGO7	G4N506_MAGO7	G4MW99_MAGO7	G4NGR4_MAGO7	G4MMY1_MAGO7	G4N4D6_MAGO7	G4NGQ6_MAGO7	G4NEP1_MAGO7	G4NHB7_MAGO7	G4MZL7_MAGO7	G4MSH9_MAGO7	G4ND44_MAGO7	G4N6C7_MAGO7	G4N974_MAGO7
molecular_function	GO:0005506	iron ion binding	16	160	0.1	0.0134335	0.99293	0.643	1	G5EHV5_MAGO7	G4MWF7_MAGO7	G4NI06_MAGO7	G4MKJ7_MAGO7	G4MKD7_MAGO7	G4NJ47_MAGO7	G4MZ08_MAGO7	G4MRL4_MAGO7	G4NG13_MAGO7	G4NG44_MAGO7	G4MX96_MAGO7	G4N1L7_MAGO7	G4MPE7_MAGO7	G4MVI0_MAGO7	G4N2X9_MAGO7	Q2KET0_MAGO7
molecular_function	GO:0005085	guanyl-nucleotide exchange factor activity	16	28	0.571429	1	9.25061e-07	1	0	GET3_MAGO7	G4MUA9_MAGO7	G4NCN0_MAGO7	G4MKY1_MAGO7	G4MN05_MAGO7	G4N5J5_MAGO7	G4MUV0_MAGO7	G4NJK5_MAGO7	G4MNX2_MAGO7	G4NIC8_MAGO7	G4N038_MAGO7	G4NDF1_MAGO7	G4N9H7_MAGO7	G4NDV0_MAGO7	G4NAK1_MAGO7	G4MRG7_MAGO7
biological_process	GO:0032259	methylation	15	81	0.185185	0.222285	0.848332	1	1	CHO2_MAGO7	NEC1_MAGO7	ACE1_MAGO7	G5EGV1_MAGO7	G5EH93_MAGO7	G4MR69_MAGO7	G4NHJ8_MAGO7	G4NHK7_MAGO7	G4NLQ3_MAGO7	G4MWD1_MAGO7	G4MWB5_MAGO7	G4NAU6_MAGO7	G4N631_MAGO7	G4N2S6_MAGO7	G4N0L3_MAGO7
molecular_function	GO:0004497	monooxygenase activity	14	147	0.0952381	0.0023965	0.998898	0.176	1	G4NI77_MAGO7	G5EHV5_MAGO7	G4NI06_MAGO7	G4MKJ7_MAGO7	G4MKD7_MAGO7	G4MZ08_MAGO7	G4MRL4_MAGO7	G4MTY8_MAGO7	G4NG13_MAGO7	G4MX96_MAGO7	G4N1L7_MAGO7	G4MPE7_MAGO7	G4N2X9_MAGO7	Q2KET0_MAGO7
cellular_component	GO:0016020	membrane	14	72	0.194444	1.12028e-08	1	0	1	G4N5A1_MAGO7	G4N839_MAGO7	G4N980_MAGO7	G4NJH8_MAGO7	G4NHE3_MAGO7	G4NE21_MAGO7	G4NCS0_MAGO7	G4N981_MAGO7	G4NG13_MAGO7	G4N034_MAGO7	G4MNJ2_MAGO7	G4NC08_MAGO7	G4N5K6_MAGO7	G5EHT6_MAGO7
cellular_component	GO:0005730	nucleolus	13	115	0.113043	0.0354129	0.980547	0.839	1	MAK5_MAGO7	UTP10_MAGO7	DRS1_MAGO7	G4MT59_MAGO7	G4NHA6_MAGO7	G4MNW4_MAGO7	G4N540_MAGO7	G4N0J6_MAGO7	G4NGS5_MAGO7	G4N8S8_MAGO7	G4NBX7_MAGO7	G4N847_MAGO7	G4MNF1_MAGO7
cellular_component	GO:0005886	plasma membrane	13	66	0.19697	0.737247	0.359056	1	1	PALH_MAGO7	G4NAB0_MAGO7	G4MNJ5_MAGO7	G4N6E9_MAGO7	G4MKQ3_MAGO7	G4MR41_MAGO7	G4NLR2_MAGO7	G4MU02_MAGO7	G4MLP9_MAGO7	G4MT77_MAGO7	G4N0X4_MAGO7	G4MNF1_MAGO7	G4NJ72_MAGO7
cellular_component	GO:0005829	cytosol	13	123	0.105691	0.0138959	0.992678	0.455	1	G4N773_MAGO7	G4MMY1_MAGO7	G4N7X5_MAGO7	G4N4D6_MAGO7	G4MYK3_MAGO7	G4MYM4_MAGO7	G4NE21_MAGO7	G4MZL7_MAGO7	G4N7T3_MAGO7	G4NCS0_MAGO7	G4N038_MAGO7	G4MNF1_MAGO7	G5EHT6_MAGO7
molecular_function	GO:0016705	oxidoreductase activity, acting on paired donors, with incorporation or reduction of molecular oxygen	13	129	0.100775	0.00497153	0.997604	0.32	1	G5EHV5_MAGO7	G4MWF7_MAGO7	G4NI06_MAGO7	G4MKJ7_MAGO7	G4MKD7_MAGO7	G4NJ47_MAGO7	G4MZ08_MAGO7	G4MRL4_MAGO7	G4MX96_MAGO7	G4N1L7_MAGO7	G4MPE7_MAGO7	G4N2X9_MAGO7	Q2KET0_MAGO7
biological_process	GO:0006355	regulation of transcription, DNA-templated	13	40	0.325	0.998696	0.00239832	1	0.577	G5EH72_MAGO7	G4NIN5_MAGO7	G4MSF2_MAGO7	G4MU11_MAGO7	G4N775_MAGO7	G4N702_MAGO7	G4N8D9_MAGO7	G4N0J6_MAGO7	G4NIS4_MAGO7	G4MKE0_MAGO7	G4N0S0_MAGO7	G4NEA8_MAGO7	G4MV99_MAGO7
molecular_function	GO:0004386	helicase activity	13	33	0.393939	0.999992	2.30545e-05	1	0.004	DCL1_MAGO7	G4MR96_MAGO7	G4NL12_MAGO7	G4MZE4_MAGO7	G4MRJ6_MAGO7	G4N9X9_MAGO7	G4MZR9_MAGO7	G4MTU4_MAGO7	G4N1L6_MAGO7	G4N3Z7_MAGO7	G4N5I6_MAGO7	G4NIZ8_MAGO7	G4MP79_MAGO7
molecular_function	GO:0106310	protein serine kinase activity	12	30	0.4	0.999593	0.00159079	1	0.255	SSN3_MAGO7	STE20_MAGO7	MCK1_MAGO7	G4MVM3_MAGO7	G4N845_MAGO7	G4NJG7_MAGO7	G4MVT0_MAGO7	G4ML35_MAGO7	G4N462_MAGO7	G4NFW8_MAGO7	G4MY59_MAGO7	G4NEM6_MAGO7
molecular_function	GO:0004712	protein serine/threonine/tyrosine kinase activity	12	31	0.387097	0.998327	0.00538372	1	0.785	SSN3_MAGO7	STE20_MAGO7	MCK1_MAGO7	G4MVM3_MAGO7	G4N845_MAGO7	G4NJG7_MAGO7	G4MVT0_MAGO7	G4ML35_MAGO7	G4N462_MAGO7	G4NFW8_MAGO7	G4MY59_MAGO7	G4NEM6_MAGO7
molecular_function	GO:0008168	methyltransferase activity	12	62	0.193548	0.424908	0.663395	1	1	NEC1_MAGO7	ACE1_MAGO7	G5EGV1_MAGO7	G4MR69_MAGO7	G4NHJ8_MAGO7	G4MW13_MAGO7	G4NHK7_MAGO7	G4NLQ3_MAGO7	G4MWD1_MAGO7	G4MWB5_MAGO7	G4NAU6_MAGO7	G4N2S6_MAGO7
biological_process	GO:0016192	vesicle-mediated transport	12	40	0.3	0.995179	0.00839052	1	0.983	G4N839_MAGO7	G4MKY1_MAGO7	G4MW99_MAGO7	G4NI52_MAGO7	G4MV52_MAGO7	G4NHB7_MAGO7	G4ND45_MAGO7	G4MYP3_MAGO7	G4N984_MAGO7	G4NGM1_MAGO7	G4N974_MAGO7	G5EHD2_MAGO7
biological_process	GO:0051301	cell division	12	49	0.244898	0.997626	0.00523235	1	0.926	G4MTP9_MAGO7	G4NCN0_MAGO7	G4ML42_MAGO7	G4N8V4_MAGO7	G4MWK4_MAGO7	G4MTB0_MAGO7	G4N573_MAGO7	G4NH61_MAGO7	G4NCT8_MAGO7	G4MMY8_MAGO7	G4MRV1_MAGO7	G4NGP9_MAGO7
molecular_function	GO:0016874	ligase activity	12	37	0.324324	0.943466	0.0853477	1	1	ACE1_MAGO7	G5EGV1_MAGO7	G4NF46_MAGO7	G4NHJ8_MAGO7	G4MPJ8_MAGO7	G4MTG7_MAGO7	G4NHK7_MAGO7	G4MWB5_MAGO7	G4NF21_MAGO7	G4MZD9_MAGO7	G4N066_MAGO7	G4NG64_MAGO7
molecular_function	GO:0005096	GTPase activator activity	11	25	0.44	1	4.76256e-09	1	0	IML1_MAGO7	G4NA14_MAGO7	G4NGW7_MAGO7	G4MTX6_MAGO7	G4MQB0_MAGO7	G4MQQ3_MAGO7	G4NAR8_MAGO7	G4NLV9_MAGO7	G4NGY4_MAGO7	G4MQB1_MAGO7	G4MUG4_MAGO7
molecular_function	GO:0031177	phosphopantetheine binding	11	34	0.323529	0.994616	0.0154248	1	0.98	NEC1_MAGO7	ACE1_MAGO7	G5EGV1_MAGO7	G4NF46_MAGO7	G4NHJ8_MAGO7	G4NHK7_MAGO7	G4MWD1_MAGO7	G4MWB5_MAGO7	G4NF21_MAGO7	G4NG64_MAGO7	G4NDV1_MAGO7
molecular_function	GO:0043565	sequence-specific DNA binding	11	19	0.578947	0.998408	0.00433174	1	0.769	NUT1_MAGO7	G4N4Y2_MAGO7	G4N0G9_MAGO7	G4MSF2_MAGO7	G4N8G7_MAGO7	G4N7G9_MAGO7	G4MW93_MAGO7	G4MWL1_MAGO7	G4MKE0_MAGO7	G4N0S0_MAGO7	G4N9W1_MAGO7
molecular_function	GO:0004252	serine-type endopeptidase activity	10	48	0.208333	0.8543	0.245707	1	1	G5EHB5_MAGO7	G4NA68_MAGO7	G4N980_MAGO7	G4NJH8_MAGO7	G4MY16_MAGO7	G4NHE3_MAGO7	G4N981_MAGO7	G4NIJ7_MAGO7	G4N6E8_MAGO7	G4MLM6_MAGO7
biological_process	GO:0006325	chromatin organization	10	41	0.243902	0.963623	0.0589183	1	1	G4MVM3_MAGO7	G4NAF3_MAGO7	G4NCH7_MAGO7	G4MR69_MAGO7	G4NIC9_MAGO7	G4NJG7_MAGO7	G4NKE1_MAGO7	G4NI80_MAGO7	G4MSV1_MAGO7	G4N1E0_MAGO7
biological_process	GO:0006633	fatty acid biosynthetic process	10	30	0.333333	0.9903	0.0254694	1	0.999	ACE1_MAGO7	G5EGV1_MAGO7	G4NHJ8_MAGO7	G4MUK6_MAGO7	G4NJB8_MAGO7	G4MWD1_MAGO7	G4MWB5_MAGO7	G4NCB1_MAGO7	G4NHR0_MAGO7	G4NDV1_MAGO7
molecular_function	GO:0004553	hydrolase activity, hydrolyzing O-glycosyl compounds	10	80	0.125	0.0154707	0.991283	0.697	1	G4MM51_MAGO7	G4MKB1_MAGO7	G4MMG0_MAGO7	G4MVJ0_MAGO7	G4NGC6_MAGO7	G4MYF0_MAGO7	G4NJV6_MAGO7	G4N9D5_MAGO7	G4N191_MAGO7	G4N4V2_MAGO7
molecular_function	GO:0003824	catalytic activity	10	98	0.102041	7.14425e-10	1	0	1	G4N8F1_MAGO7	G4NGN7_MAGO7	G4N0L2_MAGO7	G4MTQ9_MAGO7	G4N3U3_MAGO7	G4MN30_MAGO7	G4MR51_MAGO7	G4N8M6_MAGO7	G4N365_MAGO7	G4NJG3_MAGO7
cellular_component	GO:0005643	nuclear pore	10	18	0.555556	0.999995	3.80166e-05	1	0.004	G4MY96_MAGO7	G4N7B2_MAGO7	G4N675_MAGO7	G4MVM4_MAGO7	G4NIB9_MAGO7	G4MVE3_MAGO7	G4MVE2_MAGO7	G4MSW8_MAGO7	G4MTW8_MAGO7	G4NKI1_MAGO7
molecular_function	GO:0005525	GTP binding	9	118	0.0762712	0.00427365	0.998349	0.286	1	G4MT59_MAGO7	G4NIR6_MAGO7	G4N2L5_MAGO7	G4NH97_MAGO7	G4MQD8_MAGO7	G4NDZ9_MAGO7	G4NBP4_MAGO7	G4N9R2_MAGO7	G4NJ72_MAGO7
biological_process	GO:0007165	signal transduction	9	29	0.310345	1	7.04981e-08	1	0	G4NGW7_MAGO7	G4MQB0_MAGO7	G4MQQ3_MAGO7	G4NCS0_MAGO7	G4MQB1_MAGO7	G4NHG8_MAGO7	G4MNF1_MAGO7	G4MP01_MAGO7	G5EHT6_MAGO7
molecular_function	GO:0003724	RNA helicase activity	9	29	0.310345	0.987153	0.0356229	1	1	MAK5_MAGO7	DED1_MAGO7	DRS1_MAGO7	G4ND47_MAGO7	G4NHA6_MAGO7	G4NFJ0_MAGO7	G4NH56_MAGO7	A0A151V4I4_MAGO7	G4NGS5_MAGO7
molecular_function	GO:0004222	metalloendopeptidase activity	9	30	0.3	0.983466	0.0438038	1	1	NPIIA_MAGO7	G4MNG8_MAGO7	G4MKP3_MAGO7	G4N7C7_MAGO7	G4N9C9_MAGO7	G4N151_MAGO7	G4NH61_MAGO7	G4N8Z3_MAGO7	A0A151V4I2_MAGO7
molecular_function	GO:0004315	3-oxoacyl-[acyl-carrier-protein] synthase activity	9	23	0.391304	0.998148	0.00721067	1	0.833	ACE1_MAGO7	G5EGV1_MAGO7	G4NHJ8_MAGO7	G4NJB8_MAGO7	G4MWD1_MAGO7	G4MWB5_MAGO7	G4NCB1_MAGO7	G4NHR0_MAGO7	G4NDV1_MAGO7
molecular_function	GO:0140359	ABC-type transporter activity	9	39	0.230769	0.95029	0.103086	1	1	ABC7_MAGO7	G4N9N0_MAGO7	G4MMX1_MAGO7	G4MUS5_MAGO7	G4N2S4_MAGO7	G4NG68_MAGO7	G4MQL6_MAGO7	G4MW48_MAGO7	Q2KEJ1_MAGO7
molecular_function	GO:0071949	FAD binding	8	76	0.105263	0.109182	0.943149	1	1	G4MYF3_MAGO7	G4NAH7_MAGO7	G4N419_MAGO7	G4N5S7_MAGO7	G4NAG8_MAGO7	G4MTY8_MAGO7	G4MRG8_MAGO7	G4NGE9_MAGO7
cellular_component	GO:0005743	mitochondrial inner membrane	8	97	0.0824742	0.0160223	0.991772	0.495	1	G4N6U6_MAGO7	G4N4P3_MAGO7	G4NA39_MAGO7	G4NFW9_MAGO7	G4ND67_MAGO7	G4MSA4_MAGO7	G4ND59_MAGO7	G4NE44_MAGO7
biological_process	GO:0007049	cell cycle	8	21	0.380952	1	6.07876e-09	1	0	G4MTP9_MAGO7	G4ML42_MAGO7	G4MWK4_MAGO7	G4N685_MAGO7	G4MTB0_MAGO7	G4N573_MAGO7	G4NDQ6_MAGO7	G4NHA0_MAGO7
biological_process	GO:0006310	DNA recombination	8	24	0.333333	0.962968	0.0737552	1	1	G4MQC2_MAGO7	G4MRH6_MAGO7	G4NE19_MAGO7	G4MP38_MAGO7	G4MNW7_MAGO7	G4N540_MAGO7	G4MT45_MAGO7	G4MSU8_MAGO7
biological_process	GO:0007264	small GTPase mediated signal transduction	8	17	0.470588	0.99998	0.000101126	1	0.036	G5EHS7_MAGO7	G4NCN0_MAGO7	G4NH97_MAGO7	G4MNX2_MAGO7	G4N9H7_MAGO7	G4NDV0_MAGO7	G4MRG7_MAGO7	G4NJ72_MAGO7
cellular_component	GO:0000329	fungal-type vacuole membrane	8	29	0.275862	0.984514	0.0414925	1	1	G5EGV7_MAGO7	G4MUS5_MAGO7	G4N4D6_MAGO7	G4NLR2_MAGO7	G4ND26_MAGO7	G4N151_MAGO7	G4NKI8_MAGO7	G5EHV3_MAGO7
molecular_function	GO:0017056	structural constituent of nuclear pore	8	11	0.727273	0.999997	4.9625e-05	1	0.007	G4N7B2_MAGO7	G4N675_MAGO7	G4N7Y4_MAGO7	G4N4U4_MAGO7	G4NIB9_MAGO7	G4MSW8_MAGO7	G4MPJ1_MAGO7	G4MTW8_MAGO7
molecular_function	GO:0003924	GTPase activity	7	84	0.0833333	0.0236716	0.990309	0.845	1	G4NIR6_MAGO7	G4N2L5_MAGO7	G4NH97_MAGO7	G4MQD8_MAGO7	G4NDZ9_MAGO7	G4NBP4_MAGO7	G4NJ72_MAGO7
molecular_function	GO:0035091	phosphatidylinositol binding	7	18	0.388889	0.997782	0.00726074	1	0.84	HSE1_MAGO7	G4N773_MAGO7	G4ND33_MAGO7	G4NEK9_MAGO7	G4MUV9_MAGO7	G4MZL7_MAGO7	G4MYY5_MAGO7
molecular_function	GO:0003743	translation initiation factor activity	7	44	0.159091	0.573169	0.589569	1	1	EIF3K_MAGO7	DED1_MAGO7	EIF3C_MAGO7	G4MZ62_MAGO7	G4NF87_MAGO7	G4NDZ9_MAGO7	G4NEF9_MAGO7
molecular_function	GO:0000287	magnesium ion binding	7	43	0.162791	0.599763	0.563679	1	1	G4N506_MAGO7	G4NGP6_MAGO7	G4MNV7_MAGO7	G4MR48_MAGO7	G4MYK3_MAGO7	G4N2Y7_MAGO7	G4MWQ1_MAGO7
biological_process	GO:0006357	regulation of transcription by RNA polymerase II	7	34	0.205882	0.8811	0.180694	1	1	NUT1_MAGO7	G4N4Y2_MAGO7	G4MW93_MAGO7	G4N4E8_MAGO7	G4MMM1_MAGO7	G4MTL1_MAGO7	G4MNE5_MAGO7
biological_process	GO:0006260	DNA replication	7	24	0.291667	0.989998	0.0205971	1	0.999	G4MQC2_MAGO7	G4NL37_MAGO7	G4MP38_MAGO7	G4MT45_MAGO7	G4NHG4_MAGO7	G4MNY7_MAGO7	G4NIT0_MAGO7
molecular_function	GO:0016740	transferase activity	7	59	0.118644	0.629872	0.407536	1	1	G5EHS7_MAGO7	G4NAB0_MAGO7	G4NIC9_MAGO7	G4NKE1_MAGO7	G4NI80_MAGO7	G4MSV1_MAGO7	G4MLL6_MAGO7
cellular_component	GO:0000139	Golgi membrane	6	33	0.181818	0.500635	0.667932	1	1	SEC24_MAGO7	GMT_MAGO7	G4MLK4_MAGO7	G4NI52_MAGO7	G4MR41_MAGO7	G4N6C7_MAGO7
cellular_component	GO:0005681	spliceosomal complex	6	31	0.193548	0.514227	0.627354	1	1	SYF1_MAGO7	G4NCF8_MAGO7	G4NEH6_MAGO7	G4MZ61_MAGO7	G4MWR3_MAGO7	G4MPG6_MAGO7
cellular_component	GO:0000781	chromosome, telomeric region	6	16	0.375	0.993144	0.0212407	1	0.916	G4MVM3_MAGO7	G4N685_MAGO7	G4MZ82_MAGO7	G4MVC9_MAGO7	G4N4E8_MAGO7	G4NEA8_MAGO7
cellular_component	GO:0035861	site of double-strand break	6	14	0.428571	0.996671	0.0161443	1	0.893	G4N811_MAGO7	G4N540_MAGO7	G4N1A8_MAGO7	G4NIS4_MAGO7	G4N7L0_MAGO7	G4N6G2_MAGO7
molecular_function	GO:0003779	actin binding	6	23	0.26087	0.996001	0.0113891	1	0.932	G4MNJ5_MAGO7	G4MKQ3_MAGO7	G4NIY0_MAGO7	G4N6W5_MAGO7	G4N0X4_MAGO7	G4NGP9_MAGO7
molecular_function	GO:0005509	calcium ion binding	6	48	0.125	0.315337	0.816114	1	1	G4N040_MAGO7	G4MKQ3_MAGO7	G4MR41_MAGO7	G4NCS0_MAGO7	G4MNL6_MAGO7	G4MX75_MAGO7
cellular_component	GO:0005774	vacuolar membrane	6	29	0.206897	0.950929	0.0876683	1	1	ATG11_MAGO7	IML1_MAGO7	MSB2_MAGO7	G4MXL5_MAGO7	G4MT77_MAGO7	G4NJ72_MAGO7
biological_process	GO:0035556	intracellular signal transduction	6	15	0.4	1	5.32009e-08	1	0	IML1_MAGO7	G4MSZ4_MAGO7	G4MRV2_MAGO7	G4MR48_MAGO7	G4NFW8_MAGO7	G4NAK1_MAGO7
biological_process	GO:0006397	mRNA processing	6	47	0.12766	0.386708	0.706855	1	1	YME2_MAGO7	G4MSK2_MAGO7	G4MT73_MAGO7	G4ND41_MAGO7	G4N5I8_MAGO7	G4MR38_MAGO7
biological_process	GO:0043161	proteasome-mediated ubiquitin-dependent protein catabolic process	6	34	0.176471	0.162143	0.907442	1	1	G5EHL1_MAGO7	G4MSE7_MAGO7	G4NBY3_MAGO7	G4NDR0_MAGO7	G4NAA5_MAGO7	G5EHP6_MAGO7
molecular_function	GO:0043130	ubiquitin binding	6	20	0.3	0.967264	0.0924764	1	1	HSE1_MAGO7	G4MKY1_MAGO7	G4MNJ5_MAGO7	G4NEF1_MAGO7	G4NLR2_MAGO7	G4MKC1_MAGO7
molecular_function	GO:0046983	protein dimerization activity	6	18	0.333333	0.939581	0.113948	1	1	MIG1_MAGO7	G4MYV9_MAGO7	G4MZ02_MAGO7	G4NB98_MAGO7	G4MUF5_MAGO7	G4NCG4_MAGO7
biological_process	GO:0045944	positive regulation of transcription by RNA polymerase II	6	17	0.352941	0.819983	0.306119	1	1	MIG1_MAGO7	G5EI02_MAGO7	G4MUR7_MAGO7	G4N8G7_MAGO7	G4N7G9_MAGO7	G4MWL1_MAGO7
cellular_component	GO:0005874	microtubule	6	34	0.176471	0.528312	0.643264	1	1	G5EI23_MAGO7	G4NCM1_MAGO7	G4MSJ0_MAGO7	G4N446_MAGO7	G4NH27_MAGO7	G4MW60_MAGO7
biological_process	GO:0006338	chromatin remodeling	6	26	0.230769	0.942997	0.106163	1	1	INO80_MAGO7	G4NG86_MAGO7	G4MYA8_MAGO7	G4N5B7_MAGO7	G4MSV2_MAGO7	G4MKE0_MAGO7
cellular_component	GO:0005794	Golgi apparatus	6	32	0.1875	0.804364	0.278241	1	1	G4NGR4_MAGO7	G4NGQ6_MAGO7	G4ND26_MAGO7	G4NE21_MAGO7	G4NIC8_MAGO7	G4MNI5_MAGO7
cellular_component	GO:0000785	chromatin	6	44	0.136364	0.58758	0.525406	1	1	G4N811_MAGO7	G4NG86_MAGO7	G4MSV2_MAGO7	G4MVC9_MAGO7	G4N6G2_MAGO7	G4N688_MAGO7
molecular_function	GO:0050660	flavin adenine dinucleotide binding	6	64	0.09375	0.0225462	0.988321	0.836	1	G4MS69_MAGO7	G4MXT1_MAGO7	G4N440_MAGO7	G4MUR1_MAGO7	G4NEQ1_MAGO7	G4NE44_MAGO7
molecular_function	GO:0005507	copper ion binding	6	32	0.1875	0.743419	0.423213	1	1	G5EGX4_MAGO7	G5EH07_MAGO7	G4MU09_MAGO7	G4ND85_MAGO7	G4N5T0_MAGO7	G4N0V4_MAGO7
molecular_function	GO:0004843	thiol-dependent deubiquitinase	6	20	0.3	0.967264	0.0924764	1	1	G5EHE1_MAGO7	G5EHL1_MAGO7	G4NH91_MAGO7	G4N3S6_MAGO7	G4MZ61_MAGO7	G4N3H1_MAGO7
biological_process	GO:0045892	negative regulation of transcription, DNA-templated	6	12	0.5	0.985754	0.0316611	1	1	G4N0G9_MAGO7	G4NIC9_MAGO7	G4NKE1_MAGO7	G4N3K7_MAGO7	G4NI80_MAGO7	G4MSV1_MAGO7
biological_process	GO:0006364	rRNA processing	5	58	0.0862069	0.00226244	0.999172	0.226	1	MAK5_MAGO7	G4MT59_MAGO7	G4MNW4_MAGO7	G4N3K7_MAGO7	G4N847_MAGO7
molecular_function	GO:0042802	identical protein binding	5	27	0.185185	0.863537	0.256581	1	1	GET3_MAGO7	G5EI23_MAGO7	G4NDI0_MAGO7	G4MNJ5_MAGO7	G4MTL1_MAGO7
biological_process	GO:0006412	translation	5	114	0.0438596	0.0013848	0.999312	0.15	1	G4NG56_MAGO7	G4NLQ3_MAGO7	G4NGF2_MAGO7	G4NF52_MAGO7	G4NIU4_MAGO7
biological_process	GO:0006888	endoplasmic reticulum to Golgi vesicle-mediated transport	5	29	0.172414	0.706433	0.465797	1	1	SEC31_MAGO7	SEC24_MAGO7	G4NGR4_MAGO7	G4NGQ6_MAGO7	G4N6C7_MAGO7
cellular_component	GO:0043332	mating projection tip	5	10	0.5	0.993373	0.0317018	1	1	STE20_MAGO7	MYO1_MAGO7	G4N5J5_MAGO7	G4MUV9_MAGO7	G4MP09_MAGO7
cellular_component	GO:0010008	endosome membrane	5	18	0.277778	0.751226	0.413991	1	1	HSE1_MAGO7	G4N773_MAGO7	G4MNJ5_MAGO7	G4MKQ3_MAGO7	G4MYM4_MAGO7
biological_process	GO:0030245	cellulose catabolic process	5	22	0.227273	0.860223	0.289593	1	1	CE12A_MAGO7	CE12C_MAGO7	G4MMG0_MAGO7	A0A151V4E7_MAGO7	A0A151V4R8_MAGO7
biological_process	GO:0006629	lipid metabolic process	5	29	0.172414	0.486107	0.583703	1	1	IRS4_MAGO7	G4N1E1_MAGO7	G4NLL1_MAGO7	G4N4Z5_MAGO7	G4N9K6_MAGO7
molecular_function	GO:0030248	cellulose binding	5	22	0.227273	0.86549	0.281426	1	1	CE12C_MAGO7	G4N4I6_MAGO7	G4MXN4_MAGO7	G4NHR4_MAGO7	G4NIM7_MAGO7
biological_process	GO:0006897	endocytosis	5	19	0.263158	0.809361	0.359572	1	1	MYO1_MAGO7	G4N506_MAGO7	G4MNJ5_MAGO7	G4MKQ3_MAGO7	G4N034_MAGO7
molecular_function	GO:0000166	nucleotide binding	5	33	0.151515	0.999664	0.000468703	1	0.07	G4NL37_MAGO7	G4MT24_MAGO7	G4MXT0_MAGO7	G4N181_MAGO7	G4NHG4_MAGO7
biological_process	GO:0016042	lipid catabolic process	5	23	0.217391	0.89125	0.200708	1	1	PLPL_MAGO7	G4MRV2_MAGO7	G4MQR8_MAGO7	G4MR30_MAGO7	G4MV95_MAGO7
molecular_function	GO:0031267	small GTPase binding	5	17	0.294118	0.954794	0.128921	1	1	XPOT_MAGO7	G4MPR9_MAGO7	G4NEP1_MAGO7	G4MSH9_MAGO7	G4NGP9_MAGO7
molecular_function	GO:0051015	actin filament binding	5	12	0.416667	0.988834	0.0465094	1	1	MYO1_MAGO7	G4N933_MAGO7	G4NKK3_MAGO7	G4NLA2_MAGO7	G4N034_MAGO7
biological_process	GO:0008643	carbohydrate transport	5	28	0.178571	0.660503	0.531853	1	1	GMT_MAGO7	G4MNK1_MAGO7	G4N0E9_MAGO7	G4NII6_MAGO7	G5EHW3_MAGO7
molecular_function	GO:0051539	4 iron, 4 sulfur cluster binding	5	30	0.166667	0.639321	0.553008	1	1	G4NL37_MAGO7	G4MK85_MAGO7	G4MXT0_MAGO7	G4NHG4_MAGO7	G4MKI2_MAGO7
molecular_function	GO:0003684	damaged DNA binding	5	14	0.357143	0.983102	0.0629602	1	1	G5EH81_MAGO7	G4NBT5_MAGO7	G4ND24_MAGO7	G4MUV6_MAGO7	G4NCG5_MAGO7
molecular_function	GO:0016301	kinase activity	5	30	0.166667	0.999966	6.58612e-05	1	0.008	G4MN63_MAGO7	G4MUV9_MAGO7	G4MR28_MAGO7	G4N1E0_MAGO7	G4NEV0_MAGO7
molecular_function	GO:0004725	protein tyrosine phosphatase activity	5	18	0.277778	0.925446	0.184942	1	1	G4MZ37_MAGO7	G4NDH6_MAGO7	G4NH88_MAGO7	G4N549_MAGO7	G4MP10_MAGO7
molecular_function	GO:0070403	NAD+ binding	5	11	0.454545	0.995972	0.0220999	1	0.994	G4NIC9_MAGO7	G4NKE1_MAGO7	G4NI80_MAGO7	G4MSV1_MAGO7	G4N0T7_MAGO7
molecular_function	GO:0051213	dioxygenase activity	5	33	0.151515	0.25401	0.859077	1	1	G4MWF7_MAGO7	G4NJ47_MAGO7	G4N2M5_MAGO7	G4MQ72_MAGO7	G4N2X9_MAGO7
cellular_component	GO:0110165	cellular anatomical entity	5	26	0.192308	0.196479	0.889854	1	1	G4MPB7_MAGO7	G4NEL9_MAGO7	G4MY16_MAGO7	G4N775_MAGO7	G4NDF3_MAGO7
molecular_function	GO:0016788	hydrolase activity, acting on ester bonds	5	13	0.384615	0.982643	0.0252084	1	0.995	G4NBF7_MAGO7	G4NF62_MAGO7	G4MYF8_MAGO7	G4MYF7_MAGO7	G4MM04_MAGO7
biological_process	GO:0006606	protein import into nucleus	5	13	0.384615	0.974444	0.0853923	1	1	G4NB99_MAGO7	G4MPR9_MAGO7	G4N2L8_MAGO7	G4MZS0_MAGO7	G4MPJ1_MAGO7
molecular_function	GO:0003735	structural constituent of ribosome	4	127	0.0314961	2.31286e-06	1	0	1	G4NG56_MAGO7	G4NGF2_MAGO7	G4NF52_MAGO7	G4NIU4_MAGO7
cellular_component	GO:0005759	mitochondrial matrix	4	37	0.108108	0.0417356	0.982813	0.867	1	G5EH72_MAGO7	G4N9Z1_MAGO7	G4N0J8_MAGO7	G4MTJ4_MAGO7
molecular_function	GO:0004177	aminopeptidase activity	4	20	0.2	0.70122	0.487952	1	1	LAP1_MAGO7	G4MPD7_MAGO7	G4MU87_MAGO7	G4N226_MAGO7
molecular_function	GO:0008237	metallopeptidase activity	4	24	0.166667	0.818591	0.260995	1	1	G4MPD7_MAGO7	G4N5D4_MAGO7	G4MU87_MAGO7	G4N226_MAGO7
molecular_function	GO:0003729	mRNA binding	4	20	0.2	0.841624	0.315606	1	1	G4N654_MAGO7	G4N7X5_MAGO7	G4ND41_MAGO7	G4MP10_MAGO7
cellular_component	GO:0000935	division septum	4	9	0.444444	0.992326	0.0429072	1	1	G5EI23_MAGO7	G4NGQ6_MAGO7	G4NH97_MAGO7	G5EHT6_MAGO7
molecular_function	GO:0030170	pyridoxal phosphate binding	4	49	0.0816327	0.0809051	0.968935	1	1	G4N522_MAGO7	G4N0L2_MAGO7	G4NIQ1_MAGO7	G4MYI6_MAGO7
biological_process	GO:0031047	gene silencing by RNA	4	8	0.5	0.9957	0.0291842	1	1	DED1_MAGO7	G4N0F2_MAGO7	G4NJ50_MAGO7	G4N9J3_MAGO7
molecular_function	GO:0051082	unfolded protein binding	4	33	0.121212	0.357766	0.808762	1	1	GET3_MAGO7	G4MKN9_MAGO7	G4MTV9_MAGO7	G4N0J8_MAGO7
molecular_function	GO:0046982	protein heterodimerization activity	4	28	0.142857	0.512048	0.690641	1	1	G4N6Q0_MAGO7	G4N864_MAGO7	G4NDQ9_MAGO7	G4MYK2_MAGO7
biological_process	GO:0000723	telomere maintenance	4	13	0.307692	0.922226	0.191013	1	1	G4MVM3_MAGO7	G4N540_MAGO7	G4N1A8_MAGO7	G4MZ82_MAGO7
molecular_function	GO:0003682	chromatin binding	4	25	0.16	0.608031	0.583977	1	1	G4MKK5_MAGO7	G4MV94_MAGO7	G4MVC9_MAGO7	G4N4E8_MAGO7
biological_process	GO:0051028	mRNA transport	4	14	0.285714	0.920371	0.162936	1	1	G4ND41_MAGO7	G4N4U4_MAGO7	G4NIB9_MAGO7	G4MSW8_MAGO7
biological_process	GO:0006979	response to oxidative stress	4	11	0.363636	0.799292	0.332471	1	1	KATG2_MAGO7	G4N797_MAGO7	G4N931_MAGO7	G4N2X9_MAGO7
molecular_function	GO:0061630	ubiquitin protein ligase activity	4	18	0.222222	0.925446	0.184942	1	1	G4MSE7_MAGO7	G4N1R7_MAGO7	G4MX10_MAGO7	G4MMC9_MAGO7
molecular_function	GO:0016746	acyltransferase activity	4	24	0.166667	0.261773	0.805476	1	1	NEC1_MAGO7	G4MV89_MAGO7	G4MKU0_MAGO7	G4NHK7_MAGO7
molecular_function	GO:0030983	mismatched DNA binding	4	10	0.4	0.986115	0.064509	1	1	G4NFS3_MAGO7	G4NDR8_MAGO7	G4MNL0_MAGO7	G4MV84_MAGO7
biological_process	GO:0006298	mismatch repair	4	12	0.333333	0.95159	0.152292	1	1	G4NFS3_MAGO7	G4NDR8_MAGO7	G4MNL0_MAGO7	G4MV84_MAGO7
biological_process	GO:0006511	ubiquitin-dependent protein catabolic process	4	29	0.137931	0.119667	0.928104	1	1	G4MTP9_MAGO7	G4N3S6_MAGO7	G4MPR1_MAGO7	G4MKC1_MAGO7
cellular_component	GO:0005768	endosome	4	14	0.285714	0.943396	0.107911	1	1	G4MRG0_MAGO7	G4N4D6_MAGO7	G4MT77_MAGO7	G4NKI8_MAGO7
cellular_component	GO:0031011	Ino80 complex	4	13	0.307692	0.955142	0.144068	1	1	INO80_MAGO7	G4NAF3_MAGO7	G4MXK8_MAGO7	G4N5B7_MAGO7
cellular_component	GO:0005840	ribosome	4	92	0.0434783	3.21814e-06	0.999999	0	1	G4NG56_MAGO7	G4MTY0_MAGO7	G4NF52_MAGO7	G4NIU4_MAGO7
cellular_component	GO:0051285	cell cortex of cell tip	4	10	0.4	0.978746	0.086262	1	1	MYO1_MAGO7	G4N9X0_MAGO7	G5EI23_MAGO7	G4N5J5_MAGO7
biological_process	GO:0071963	establishment or maintenance of cell polarity regulating cell shape	4	8	0.5	0.991625	0.0458317	1	1	MYO1_MAGO7	G4MUV9_MAGO7	G4MW60_MAGO7	G4MY59_MAGO7
cellular_component	GO:0005816	spindle pole body	4	13	0.307692	0.970743	0.0784025	1	1	G4N9X0_MAGO7	G4NGQ6_MAGO7	G4MP09_MAGO7	G5EHT6_MAGO7
molecular_function	GO:0016757	glycosyltransferase activity	4	29	0.137931	0.131517	0.91977	1	1	G4MQE4_MAGO7	G4N0J7_MAGO7	G4N1M3_MAGO7	G4MMZ0_MAGO7
biological_process	GO:0006099	tricarboxylic acid cycle	4	18	0.222222	0.838786	0.342654	1	1	G4MNV7_MAGO7	G4NIW7_MAGO7	G4NE44_MAGO7	G4N2P5_MAGO7
cellular_component	GO:0000776	kinetochore	4	13	0.307692	0.776984	0.383012	1	1	G4MQ04_MAGO7	G4N573_MAGO7	G4MRV1_MAGO7	G4N1E3_MAGO7
biological_process	GO:0043486	histone exchange	4	8	0.5	0.999434	0.00424619	1	0.778	G4MUK2_MAGO7	G4MXK8_MAGO7	G4MUR7_MAGO7	G4N702_MAGO7
cellular_component	GO:0000145	exocyst	4	8	0.5	0.996072	0.0272479	1	0.999	G4N9X0_MAGO7	G4N599_MAGO7	G4MT76_MAGO7	G4MRU4_MAGO7
biological_process	GO:0006887	exocytosis	4	10	0.4	0.95159	0.152292	1	1	G4N9X0_MAGO7	G4N599_MAGO7	G4MT76_MAGO7	G4MRU4_MAGO7
biological_process	GO:0006541	glutamine metabolic process	4	13	0.307692	0.891865	0.262606	1	1	G4N236_MAGO7	G4MVB1_MAGO7	G4MTF2_MAGO7	G4NDG8_MAGO7
biological_process	GO:0016579	protein deubiquitination	4	14	0.285714	0.914608	0.223988	1	1	G5EHL1_MAGO7	G4N3S6_MAGO7	G4MZ61_MAGO7	G4N3H1_MAGO7
molecular_function	GO:0016614	oxidoreductase activity, acting on CH-OH group of donors	4	25	0.16	0.0145782	0.993741	0.681	1	G4MS69_MAGO7	G4MXT1_MAGO7	G4N440_MAGO7	G4NEQ1_MAGO7
molecular_function	GO:0008061	chitin binding	4	34	0.117647	0.330627	0.827347	1	1	G4NDK9_MAGO7	G4NAH7_MAGO7	G4NGC6_MAGO7	G4N4F9_MAGO7
molecular_function	GO:0016810	hydrolase activity, acting on carbon-nitrogen (but not peptide) bonds	4	17	0.235294	0.742662	0.367484	1	1	G4NFA4_MAGO7	G4MWM7_MAGO7	G4N4F9_MAGO7	G4N899_MAGO7
biological_process	GO:0044550	secondary metabolite biosynthetic process	4	15	0.266667	0.270331	0.866699	1	1	G4N5R7_MAGO7	G4N6C6_MAGO7	G4NBC8_MAGO7	G4MZV4_MAGO7
molecular_function	GO:0016791	phosphatase activity	4	13	0.307692	0.660379	0.446415	1	1	G4NG26_MAGO7	G4MR48_MAGO7	G4MRY1_MAGO7	G4N711_MAGO7
cellular_component	GO:0008541	proteasome regulatory particle, lid subcomplex	4	9	0.444444	0.992326	0.0429072	1	1	G4NDR0_MAGO7	G4N450_MAGO7	G4NAA5_MAGO7	G5EHP6_MAGO7
cellular_component	GO:0035267	NuA4 histone acetyltransferase complex	4	7	0.571429	0.999068	0.00767382	1	0.691	G4NAF3_MAGO7	G4MXK8_MAGO7	G4MYA8_MAGO7	G4NIS4_MAGO7
biological_process	GO:0042147	retrograde transport, endosome to Golgi	4	11	0.363636	0.976936	0.0916542	1	1	G4N773_MAGO7	G4N4D6_MAGO7	G4MYM4_MAGO7	G4MZL7_MAGO7
cellular_component	GO:0032153	cell division site	4	12	0.333333	0.998853	0.00350966	1	0.318	G4MUV9_MAGO7	G4NDN3_MAGO7	G4NGP9_MAGO7	G4NJ72_MAGO7
biological_process	GO:0006302	double-strand break repair	4	10	0.4	0.965681	0.0796292	1	1	G4ND24_MAGO7	G4NIS4_MAGO7	G4MSU8_MAGO7	G4MPV1_MAGO7
biological_process	GO:0030150	protein import into mitochondrial matrix	4	11	0.363636	0.976936	0.0916542	1	1	G4MVJ5_MAGO7	G4N0J8_MAGO7	G4N151_MAGO7	G4NH61_MAGO7
molecular_function	GO:0004842	ubiquitin-protein transferase activity	4	13	0.307692	0.943736	0.118398	1	1	G4N9F6_MAGO7	G4NHH2_MAGO7	G4N9V1_MAGO7	G4MYM6_MAGO7
cellular_component	GO:0005694	chromosome	3	11	0.272727	0.972327	0.0417863	1	1	G4MK85_MAGO7	G4N8V4_MAGO7	G4MS23_MAGO7
biological_process	GO:0000398	mRNA splicing, via spliceosome	3	29	0.103448	0.509442	0.632292	1	1	SYF1_MAGO7	G4NCF8_MAGO7	G4NEH6_MAGO7
biological_process	GO:0006406	mRNA export from nucleus	3	9	0.333333	0.808987	0.383091	1	1	G4MSK2_MAGO7	G4N450_MAGO7	G4MPJ1_MAGO7
biological_process	GO:0000122	negative regulation of transcription by RNA polymerase II	3	11	0.272727	0.847708	0.363732	1	1	STE20_MAGO7	G4MUR7_MAGO7	G4MTA2_MAGO7
cellular_component	GO:0034045	phagophore assembly site membrane	3	11	0.272727	0.913738	0.255767	1	1	ATG11_MAGO7	ATG2_MAGO7	ATG16_MAGO7
biological_process	GO:0006914	autophagy	3	22	0.136364	0.881402	0.19946	1	1	ATG16_MAGO7	G4N773_MAGO7	G4NGP7_MAGO7
biological_process	GO:0000184	nuclear-transcribed mRNA catabolic process, nonsense-mediated decay	3	7	0.428571	0.991625	0.0458317	1	1	G4N7I3_MAGO7	G4ND47_MAGO7	G4ND41_MAGO7
cellular_component	GO:0046540	U4/U6 x U5 tri-snRNP complex	3	16	0.1875	0.749749	0.489399	1	1	G4NCF8_MAGO7	G4N5D4_MAGO7	G4MPG6_MAGO7
biological_process	GO:0008033	tRNA processing	3	18	0.166667	0.0751167	0.964637	1	1	XPOT_MAGO7	G4MSH9_MAGO7	G4NAU6_MAGO7
molecular_function	GO:0016853	isomerase activity	3	15	0.2	0.0471069	0.979088	0.986	1	ACE1_MAGO7	G4MW52_MAGO7	G4NFW4_MAGO7
cellular_component	GO:0032040	small-subunit processome	3	32	0.09375	0.217785	0.908963	1	1	G4NHA6_MAGO7	G4MZ70_MAGO7	G4NGS5_MAGO7
cellular_component	GO:0030479	actin cortical patch	3	19	0.157895	0.632433	0.611825	1	1	MYO1_MAGO7	G4MKQ3_MAGO7	G4NLA2_MAGO7
cellular_component	GO:0005741	mitochondrial outer membrane	3	20	0.15	0.263792	0.883821	1	1	MDM34_MAGO7	G4N6E9_MAGO7	G4ND44_MAGO7
biological_process	GO:0000002	mitochondrial genome maintenance	3	16	0.1875	0.838786	0.342654	1	1	YME2_MAGO7	MDM34_MAGO7	G4MW52_MAGO7
biological_process	GO:0006869	lipid transport	3	12	0.25	0.722614	0.464667	1	1	ATG2_MAGO7	MDM34_MAGO7	G4NLC1_MAGO7
cellular_component	GO:0071014	post-mRNA release spliceosomal complex	3	15	0.2	0.711218	0.532388	1	1	G4NHA6_MAGO7	G4NFJ0_MAGO7	G4N5D4_MAGO7
cellular_component	GO:0031965	nuclear membrane	3	10	0.3	0.995757	0.0171429	1	0.905	G4N4U4_MAGO7	G4MPJ1_MAGO7	G5EHC7_MAGO7
molecular_function	GO:0004096	catalase activity	3	4	0.75	0.999303	0.0150911	1	0.979	KATG2_MAGO7	G4N797_MAGO7	G4N931_MAGO7
biological_process	GO:0042744	hydrogen peroxide catabolic process	3	5	0.6	0.996843	0.0341667	1	1	KATG2_MAGO7	G4N797_MAGO7	G4N931_MAGO7
molecular_function	GO:0050525	cutinase activity	3	10	0.3	0.935491	0.213681	1	1	G4NHM4_MAGO7	G4MQV7_MAGO7	G4MZV6_MAGO7
molecular_function	GO:0004806	triglyceride lipase activity	3	7	0.428571	0.983876	0.0901624	1	1	PLPL_MAGO7	G4MQR8_MAGO7	G4MR30_MAGO7
biological_process	GO:0006417	regulation of translation	3	7	0.428571	0.977345	0.0485656	1	1	G4MRY9_MAGO7	G4ND41_MAGO7	G4MP09_MAGO7
biological_process	GO:0048315	conidium formation	3	9	0.333333	0.933288	0.218659	1	1	SWI6_MAGO7	STUA_MAGO7	G4N0X4_MAGO7
biological_process	GO:0009231	riboflavin biosynthetic process	3	8	0.375	0.970816	0.13066	1	1	G4N2M4_MAGO7	G4NIN7_MAGO7	G4N9R2_MAGO7
biological_process	GO:0042254	ribosome biogenesis	3	23	0.130435	0.000547192	0.999794	0.064	1	UTP10_MAGO7	DRS1_MAGO7	G4N8S8_MAGO7
cellular_component	GO:0005635	nuclear envelope	3	11	0.272727	0.999995	2.02715e-05	1	0.004	G4NB99_MAGO7	G4MR41_MAGO7	G4N8S8_MAGO7
molecular_function	GO:0000049	tRNA binding	3	18	0.166667	0.585732	0.654581	1	1	XPOT_MAGO7	G4N9Z1_MAGO7	G4MTL1_MAGO7
biological_process	GO:0034599	cellular response to oxidative stress	3	24	0.125	0.468147	0.726937	1	1	G4MZ98_MAGO7	G4N0Y7_MAGO7	G4NFA9_MAGO7
biological_process	GO:0051321	meiotic cell cycle	3	5	0.6	0.997573	0.00679731	1	0.943	G4MRH6_MAGO7	G4N9J8_MAGO7	G4MSU8_MAGO7
biological_process	GO:0055085	transmembrane transport	3	40	0.075	0.518234	0.584941	1	1	G4MNK1_MAGO7	G4N2L9_MAGO7	G4MSA4_MAGO7
biological_process	GO:0006488	dolichol-linked oligosaccharide biosynthetic process	3	9	0.333333	0.954168	0.173075	1	1	G4MXA9_MAGO7	G4MQR3_MAGO7	G4MR62_MAGO7
biological_process	GO:0030242	autophagy of peroxisome	3	3	1	0.996843	0.0341667	1	1	ATG2_MAGO7	G4NFW8_MAGO7	G4NKI8_MAGO7
biological_process	GO:0016239	positive regulation of macroautophagy	3	4	0.75	0.983258	0.0926068	1	1	G4MR95_MAGO7	G4MTA2_MAGO7	G4NKI8_MAGO7
cellular_component	GO:0005628	prospore membrane	3	5	0.6	0.997077	0.0323373	1	1	MYO1_MAGO7	G4MZL7_MAGO7	G4NDN3_MAGO7
molecular_function	GO:0004622	lysophospholipase activity	3	3	1	1	0.00429545	1	0.769	NTE1_MAGO7	G4MTD9_MAGO7	G4MUL5_MAGO7
molecular_function	GO:0102545	phosphatidyl phospholipase B activity	3	3	1	1	0.00429545	1	0.769	NTE1_MAGO7	G4MTD9_MAGO7	G4MUL5_MAGO7
molecular_function	GO:0003712	transcription coregulator activity	3	22	0.136364	0.881725	0.230305	1	1	G4MR14_MAGO7	G4N864_MAGO7	G4MKS7_MAGO7
biological_process	GO:0006270	DNA replication initiation	3	13	0.230769	0.891865	0.262606	1	1	G4NDQ6_MAGO7	G4MSV4_MAGO7	G4MQP3_MAGO7
cellular_component	GO:0005935	cellular bud neck	3	14	0.214286	0.711218	0.532388	1	1	G4MTA2_MAGO7	G4MP09_MAGO7	G4NJ72_MAGO7
biological_process	GO:0006396	RNA processing	3	17	0.176471	0.00400459	0.997639	0.388	1	DCL1_MAGO7	G4MT27_MAGO7	G4NIZ8_MAGO7
molecular_function	GO:0008017	microtubule binding	3	13	0.230769	0.782027	0.450995	1	1	G4MZ95_MAGO7	G4MWK4_MAGO7	G4N446_MAGO7
biological_process	GO:0007018	microtubule-based movement	3	12	0.25	0.657346	0.588428	1	1	G4MWK4_MAGO7	G4MSJ0_MAGO7	G4N446_MAGO7
molecular_function	GO:0003714	transcription corepressor activity	3	5	0.6	0.996967	0.0331787	1	1	G4N744_MAGO7	G4MUR7_MAGO7	G4MQC7_MAGO7
biological_process	GO:0044205	'de novo' UMP biosynthetic process	3	6	0.5	0.99176	0.0600933	1	1	G4MUI6_MAGO7	G4MTF2_MAGO7	G4NJG9_MAGO7
biological_process	GO:0007094	mitotic spindle assembly checkpoint signaling	3	4	0.75	0.99176	0.0600933	1	1	G4MQ04_MAGO7	G4N332_MAGO7	G4MP09_MAGO7
molecular_function	GO:0000155	phosphorelay sensor kinase activity	3	10	0.3	0.935491	0.213681	1	1	G4NKR9_MAGO7	G4MU11_MAGO7	G4MUD6_MAGO7
molecular_function	GO:0043531	ADP binding	3	8	0.375	0.971854	0.127373	1	1	G4MMF6_MAGO7	G4NKS4_MAGO7	G5EHR0_MAGO7
biological_process	GO:0007064	mitotic sister chromatid cohesion	3	8	0.375	0.965693	0.120328	1	1	G4N811_MAGO7	G4N221_MAGO7	G4MMY8_MAGO7
cellular_component	GO:0051286	cell tip	3	5	0.6	0.997291	0.00916035	1	0.722	G5EI23_MAGO7	G4NDN3_MAGO7	G5EHT6_MAGO7
molecular_function	GO:0019706	protein-cysteine S-palmitoyltransferase activity	3	6	0.5	0.992074	0.0584318	1	1	G5EH51_MAGO7	G4MRI5_MAGO7	G4N6T7_MAGO7
cellular_component	GO:0008180	COP9 signalosome	3	7	0.428571	0.984412	0.0881001	1	1	G4NCX3_MAGO7	G4NAX6_MAGO7	G5EHP6_MAGO7
molecular_function	GO:0019901	protein kinase binding	3	9	0.333333	0.935491	0.213681	1	1	G5EGW0_MAGO7	G4MR95_MAGO7	G4N357_MAGO7
molecular_function	GO:0004190	aspartic-type endopeptidase activity	3	23	0.130435	0.471356	0.747719	1	1	G5EH92_MAGO7	G5EHS6_MAGO7	G5EH06_MAGO7
cellular_component	GO:0005938	cell cortex	3	5	0.6	0.987108	0.0281313	1	0.999	G5EHD3_MAGO7	G4NH97_MAGO7	G4MUJ9_MAGO7
molecular_function	GO:0005543	phospholipid binding	3	5	0.6	0.999807	0.000696388	1	0.126	G5EHD3_MAGO7	G5EGV7_MAGO7	G4MUJ9_MAGO7
molecular_function	GO:0005484	SNAP receptor activity	3	8	0.375	0.971854	0.127373	1	1	G4NGR4_MAGO7	G4NI52_MAGO7	G4NHB7_MAGO7
biological_process	GO:0070647	protein modification by small protein conjugation or removal	3	19	0.157895	0.848936	0.235182	1	1	G4N587_MAGO7	G4MKT3_MAGO7	G4MTJ7_MAGO7
molecular_function	GO:0010181	FMN binding	3	23	0.130435	0.471356	0.747719	1	1	G4NG13_MAGO7	G4NG44_MAGO7	G4N741_MAGO7
molecular_function	GO:0042393	histone binding	3	8	0.375	0.9779	0.0887427	1	1	G4N6Q0_MAGO7	G4MUR7_MAGO7	G4MU89_MAGO7
cellular_component	GO:0043229	intracellular organelle	3	7	0.428571	1	1.74794e-09	1	0	G4NB96_MAGO7	G4MTA9_MAGO7	G4MKP7_MAGO7
molecular_function	GO:0003887	DNA-directed DNA polymerase activity	3	8	0.375	0.971854	0.127373	1	1	G4NL37_MAGO7	G4MXT0_MAGO7	G4NHG4_MAGO7
biological_process	GO:0000077	DNA damage checkpoint signaling	3	5	0.6	0.998079	0.00921988	1	0.984	G4MVM3_MAGO7	G4ML35_MAGO7	G4N5P0_MAGO7
biological_process	GO:0032012	regulation of ARF protein signal transduction	3	4	0.75	0.999273	0.0155611	1	0.999	G4MN05_MAGO7	G4NIC8_MAGO7	G4NDF1_MAGO7
cellular_component	GO:0005669	transcription factor TFIID complex	3	10	0.3	0.937377	0.209538	1	1	G4NDQ9_MAGO7	G4MY40_MAGO7	G4N720_MAGO7
biological_process	GO:0048193	Golgi vesicle transport	3	6	0.5	0.8143	0.282751	1	1	G4MLK4_MAGO7	G4NDN3_MAGO7	G4MMA7_MAGO7
molecular_function	GO:0003968	RNA-directed 5'-3' RNA polymerase activity	3	10	0.3	0.935491	0.213681	1	1	G4N0F2_MAGO7	G4NEH8_MAGO7	G4NJ50_MAGO7
biological_process	GO:0043248	proteasome assembly	3	10	0.3	0.537325	0.696244	1	1	G4NFR7_MAGO7	G4N450_MAGO7	G4NAA5_MAGO7
molecular_function	GO:0017116	single-stranded DNA helicase activity	3	7	0.428571	0.955741	0.168929	1	1	G4MK85_MAGO7	G4N540_MAGO7	G4MVC9_MAGO7
cellular_component	GO:0000124	SAGA complex	3	9	0.333333	0.957093	0.165464	1	1	G4MR14_MAGO7	G4NDQ9_MAGO7	G4N4E8_MAGO7
cellular_component	GO:0005856	cytoskeleton	3	10	0.3	0.959943	0.0646224	1	1	G4MNJ5_MAGO7	G4N5J5_MAGO7	G4NFW8_MAGO7
molecular_function	GO:0060090	molecular adaptor activity	3	7	0.428571	0.973834	0.063713	1	1	G4N1A8_MAGO7	G4NFR7_MAGO7	G4NLA2_MAGO7
biological_process	GO:0010564	regulation of cell cycle process	3	4	0.75	0.999954	0.000145786	1	0.057	G4MTT5_MAGO7	G4MTX4_MAGO7	G4MTX5_MAGO7
biological_process	GO:0061982	meiosis I cell cycle process	3	6	0.5	0.974757	0.0701032	1	1	G4MNW7_MAGO7	G4MV84_MAGO7	G4MZZ7_MAGO7
molecular_function	GO:0004176	ATP-dependent peptidase activity	3	5	0.6	0.996967	0.0331787	1	1	G4N151_MAGO7	G4NH61_MAGO7	G4MLM6_MAGO7
biological_process	GO:0030036	actin cytoskeleton organization	3	7	0.428571	0.865175	0.22609	1	1	G4N7N3_MAGO7	G4N034_MAGO7	G4NGP9_MAGO7
biological_process	GO:0030437	ascospore formation	3	4	0.75	0.998961	0.00837479	1	0.983	G4N4D6_MAGO7	G4MYK3_MAGO7	G4N1A8_MAGO7
molecular_function	GO:0004088	carbamoyl-phosphate synthase (glutamine-hydrolyzing) activity	3	3	1	1	0.00429545	1	0.769	G4MVB1_MAGO7	G4MS82_MAGO7	G4MTF2_MAGO7
molecular_function	GO:0004652	polynucleotide adenylyltransferase activity	3	4	0.75	0.992074	0.0584318	1	1	G4MW78_MAGO7	G4N5I8_MAGO7	A0A151V4I6_MAGO7
biological_process	GO:0006401	RNA catabolic process	3	6	0.5	0.974859	0.0503818	1	1	G4NIS7_MAGO7	G4NH56_MAGO7	A0A151V4I4_MAGO7
biological_process	GO:0055088	lipid homeostasis	3	4	0.75	0.970816	0.13066	1	1	G4MTA2_MAGO7	G4ND67_MAGO7	G5EHC7_MAGO7
cellular_component	GO:0140445	chromosome, telomeric repeat region	3	8	0.375	0.957093	0.165464	1	1	G4N540_MAGO7	G4N1A8_MAGO7	G4MXT0_MAGO7
molecular_function	GO:0004693	cyclin-dependent protein serine/threonine kinase activity	2	3	0.666667	0.995705	0.0707588	1	1	SSN3_MAGO7	G4MTA2_MAGO7
molecular_function	GO:0017025	TBP-class protein binding	2	5	0.4	0.966821	0.188592	1	1	G4N3K7_MAGO7	G4NEF9_MAGO7
cellular_component	GO:0030127	COPII vesicle coat	2	5	0.4	0.967663	0.185718	1	1	SEC24_MAGO7	G4N6C7_MAGO7
cellular_component	GO:0012507	ER to Golgi transport vesicle membrane	2	4	0.5	0.992326	0.0429072	1	1	SEC31_MAGO7	G4NGR4_MAGO7
molecular_function	GO:0000386	second spliceosomal transesterification activity	2	3	0.666667	0.995705	0.0707588	1	1	G4NFJ0_MAGO7	G4N5D4_MAGO7
biological_process	GO:0031509	subtelomeric heterochromatin assembly	2	11	0.181818	0.733715	0.562068	1	1	G4MVC9_MAGO7	G4N4E8_MAGO7
cellular_component	GO:0000131	incipient cellular bud site	2	5	0.4	0.967663	0.185718	1	1	STE20_MAGO7	G4NJ72_MAGO7
biological_process	GO:0007121	bipolar cellular bud site selection	2	2	1	1	0.0270343	1	1	STE20_MAGO7	G4NJ72_MAGO7
biological_process	GO:0007232	osmosensory signaling pathway via Sho1 osmosensor	2	2	1	1	0.0270343	1	1	STE20_MAGO7	MSB2_MAGO7
biological_process	GO:0000750	pheromone-dependent signal transduction involved in conjugation with cellular fusion	2	3	0.666667	0.984439	0.128904	1	1	STE20_MAGO7	GET3_MAGO7
biological_process	GO:0034063	stress granule assembly	2	3	0.666667	0.995565	0.0722326	1	1	STE20_MAGO7	G4NFW8_MAGO7
biological_process	GO:0030435	sporulation resulting in formation of a cellular spore	2	9	0.222222	0.995192	0.0190229	1	0.999	SWI6_MAGO7	STUA_MAGO7
molecular_function	GO:0008810	cellulase activity	2	5	0.4	0.966821	0.188592	1	1	CE12A_MAGO7	CE12C_MAGO7
molecular_function	GO:0008235	metalloexopeptidase activity	2	18	0.111111	0.347379	0.802792	1	1	LAP1_MAGO7	G4N6J0_MAGO7
cellular_component	GO:0005732	sno(s)RNA-containing ribonucleoprotein complex	2	10	0.2	0.426743	0.812193	1	1	UTP10_MAGO7	G4N8S8_MAGO7
biological_process	GO:0000290	deadenylation-dependent decapping of nuclear-transcribed mRNA	2	8	0.25	0.86934	0.388744	1	1	G4N7I3_MAGO7	G4NFW4_MAGO7
cellular_component	GO:0005783	endoplasmic reticulum	2	41	0.0487805	0.380553	0.694124	1	1	G4N042_MAGO7	G5EHT6_MAGO7
biological_process	GO:0000350	generation of catalytic spliceosome for second transesterification step	2	3	0.666667	0.995565	0.0722326	1	1	G4NFJ0_MAGO7	G4N5D4_MAGO7
cellular_component	GO:0016282	eukaryotic 43S preinitiation complex	2	14	0.142857	0.601765	0.685479	1	1	EIF3K_MAGO7	EIF3C_MAGO7
cellular_component	GO:0033290	eukaryotic 48S preinitiation complex	2	16	0.125	0.510601	0.75585	1	1	EIF3K_MAGO7	EIF3C_MAGO7
molecular_function	GO:0043022	ribosome binding	2	13	0.153846	0.595609	0.690721	1	1	EIF3K_MAGO7	G4MR95_MAGO7
biological_process	GO:0001732	formation of cytoplasmic translation initiation complex	2	14	0.142857	0.588077	0.697312	1	1	EIF3K_MAGO7	EIF3C_MAGO7
cellular_component	GO:0000407	phagophore assembly site	2	7	0.285714	0.943496	0.151378	1	1	G4NIZ2_MAGO7	G4NKI8_MAGO7
biological_process	GO:1990625	negative regulation of cytoplasmic translational initiation in response to stress	2	2	1	1	0.0270343	1	1	DED1_MAGO7	G4MR95_MAGO7
biological_process	GO:0006890	retrograde vesicle-mediated transport, Golgi to endoplasmic reticulum	2	17	0.117647	0.452534	0.796062	1	1	GET3_MAGO7	G4NGR4_MAGO7
molecular_function	GO:0031369	translation initiation factor binding	2	9	0.222222	0.831071	0.444133	1	1	EIF3C_MAGO7	G4MR95_MAGO7
biological_process	GO:0006526	arginine biosynthetic process	2	5	0.4	0.86934	0.388744	1	1	G5EH72_MAGO7	G4MS82_MAGO7
biological_process	GO:0000045	autophagosome assembly	2	7	0.285714	0.733715	0.562068	1	1	ATG11_MAGO7	G4NIZ2_MAGO7
cellular_component	GO:0005849	mRNA cleavage factor complex	2	4	0.5	0.834536	0.439066	1	1	G4N6C6_MAGO7	G4N654_MAGO7
molecular_function	GO:0008289	lipid binding	2	19	0.105263	0.993327	0.0149773	1	0.957	MDM34_MAGO7	G4NLC1_MAGO7
biological_process	GO:0007005	mitochondrion organization	2	8	0.25	0.436126	0.677713	1	1	MDM34_MAGO7	G4ND67_MAGO7
biological_process	GO:0008652	cellular amino acid biosynthetic process	2	8	0.25	0.0209591	0.991567	0.927	1	G4N9G9_MAGO7	G4MKI2_MAGO7
cellular_component	GO:0010494	cytoplasmic stress granule	2	8	0.25	0.875389	0.378265	1	1	EIF3C_MAGO7	G4NFW8_MAGO7
biological_process	GO:0045292	mRNA cis splicing, via spliceosome	2	13	0.153846	0.737394	0.504207	1	1	G4N462_MAGO7	G4MPG6_MAGO7
molecular_function	GO:0008422	beta-glucosidase activity	2	12	0.166667	0.691509	0.60472	1	1	A0A151V4E7_MAGO7	A0A151V4R8_MAGO7
molecular_function	GO:0102483	scopolin beta-glucosidase activity	2	10	0.2	0.786319	0.501746	1	1	A0A151V4E7_MAGO7	A0A151V4R8_MAGO7
biological_process	GO:0045721	negative regulation of gluconeogenesis	2	5	0.4	0.965833	0.192062	1	1	G4MSE7_MAGO7	G4N7T3_MAGO7
molecular_function	GO:0016829	lyase activity	2	29	0.0689655	0.000252486	0.99992	0.015	1	G4ND68_MAGO7	G4MYI6_MAGO7
molecular_function	GO:0004519	endonuclease activity	2	16	0.125	0.820982	0.28923	1	1	G4NE59_MAGO7	G4N273_MAGO7
biological_process	GO:0006506	GPI anchor biosynthetic process	2	20	0.1	0.218753	0.924125	1	1	G4N7K4_MAGO7	G4NJG3_MAGO7
cellular_component	GO:0070971	endoplasmic reticulum exit site	2	3	0.666667	0.995825	0.0695274	1	1	SEC24_MAGO7	G4NGP7_MAGO7
biological_process	GO:0006998	nuclear envelope organization	2	3	0.666667	0.999384	0.00824015	1	0.98	G4MYK3_MAGO7	G5EHC7_MAGO7
biological_process	GO:0000083	regulation of transcription involved in G1/S transition of mitotic cell cycle	2	5	0.4	0.991625	0.0458317	1	1	SWI6_MAGO7	G4MTA2_MAGO7
biological_process	GO:0006879	cellular iron ion homeostasis	2	8	0.25	0.826925	0.450363	1	1	G4N0Y7_MAGO7	G4ND26_MAGO7
cellular_component	GO:0031080	nuclear pore outer ring	2	3	0.666667	0.995825	0.0695274	1	1	G4N4U4_MAGO7	G4MPJ1_MAGO7
biological_process	GO:0043547	positive regulation of GTPase activity	2	5	0.4	0.998136	0.0167419	1	0.999	G4NA14_MAGO7	G4NGY4_MAGO7
biological_process	GO:1903097	regulation of CENP-A containing nucleosome assembly	2	2	1	1	0.0270343	1	1	INO80_MAGO7	G4N5B7_MAGO7
biological_process	GO:0045493	xylan catabolic process	2	29	0.0689655	0.121192	0.964015	1	1	G4NHR4_MAGO7	G4NIM7_MAGO7
cellular_component	GO:0031225	anchored component of membrane	2	26	0.0769231	0.185533	0.938444	1	1	G4NAB0_MAGO7	G4MLP9_MAGO7
cellular_component	GO:0030015	CCR4-NOT core complex	2	5	0.4	0.967663	0.185718	1	1	G4NIN5_MAGO7	G4MRY9_MAGO7
biological_process	GO:0006352	DNA-templated transcription, initiation	2	7	0.285714	0.483528	0.663468	1	1	G4NDQ9_MAGO7	G4MYK2_MAGO7
biological_process	GO:0051276	chromosome organization	2	4	0.5	0.997879	0.00367137	1	0.726	G4N8V4_MAGO7	G4MYK3_MAGO7
molecular_function	GO:0030145	manganese ion binding	2	8	0.25	0.872627	0.382976	1	1	G4N7I3_MAGO7	G4N1A8_MAGO7
cellular_component	GO:0031097	medial cortex	2	6	0.333333	0.9119	0.314852	1	1	MYO1_MAGO7	G4N5J5_MAGO7
biological_process	GO:2000601	positive regulation of Arp2/3 complex-mediated actin nucleation	2	4	0.5	0.984439	0.128904	1	1	MYO1_MAGO7	G4NIY0_MAGO7
cellular_component	GO:0031298	replication fork protection complex	2	11	0.181818	0.744233	0.549933	1	1	G4MU89_MAGO7	G4MVC9_MAGO7
cellular_component	GO:0005758	mitochondrial intermembrane space	2	20	0.1	0.318327	0.875047	1	1	G4N0Y7_MAGO7	G4ND59_MAGO7
molecular_function	GO:0051287	NAD binding	2	33	0.0606061	0.573169	0.589569	1	1	G5EH72_MAGO7	G4MWW7_MAGO7
molecular_function	GO:0003678	DNA helicase activity	2	8	0.25	0.981933	0.0537934	1	1	G4N811_MAGO7	G4MQP3_MAGO7
biological_process	GO:0048478	replication fork protection	2	4	0.5	0.984439	0.128904	1	1	G4NIS4_MAGO7	G4N6G2_MAGO7
biological_process	GO:0016226	iron-sulfur cluster assembly	2	13	0.153846	0.495793	0.766815	1	1	G4MYW3_MAGO7	G4MSX0_MAGO7
biological_process	GO:0006874	cellular calcium ion homeostasis	2	6	0.333333	0.95159	0.152292	1	1	G4NGV0_MAGO7	G4ND26_MAGO7
biological_process	GO:0006486	protein glycosylation	2	27	0.0740741	0.288146	0.84451	1	1	G4N7Y8_MAGO7	G4N0J7_MAGO7
molecular_function	GO:0004601	peroxidase activity	2	18	0.111111	0.731392	0.454171	1	1	G4MZ98_MAGO7	G4N2X9_MAGO7
molecular_function	GO:0009055	electron transfer activity	2	10	0.2	0.202155	0.93132	1	1	G4NG13_MAGO7	G4N2P5_MAGO7
molecular_function	GO:0003777	microtubule motor activity	2	9	0.222222	0.911257	0.260532	1	1	G4MWK4_MAGO7	G4N446_MAGO7
biological_process	GO:0006457	protein folding	2	28	0.0714286	0.0607483	0.977822	1	1	G4NCM1_MAGO7	G4NH61_MAGO7
biological_process	GO:0006807	nitrogen compound metabolic process	2	13	0.153846	0.144124	0.875706	1	1	G4MN51_MAGO7	G4NF69_MAGO7
biological_process	GO:0019441	tryptophan catabolic process to kynurenine	2	8	0.25	0.86934	0.388744	1	1	G4NAM1_MAGO7	G4N6N3_MAGO7
biological_process	GO:0006623	protein targeting to vacuole	2	9	0.222222	0.908346	0.266285	1	1	G4NE21_MAGO7	G4N984_MAGO7
biological_process	GO:0009058	biosynthetic process	2	23	0.0869565	0.231939	0.796823	1	1	G4N0L2_MAGO7	G4NIQ1_MAGO7
cellular_component	GO:0000812	Swr1 complex	2	5	0.4	0.967663	0.185718	1	1	G4MUK2_MAGO7	G4MXK8_MAGO7
biological_process	GO:0006289	nucleotide-excision repair	2	16	0.125	0.537325	0.696244	1	1	G4N273_MAGO7	G4MUV6_MAGO7
biological_process	GO:0006749	glutathione metabolic process	2	16	0.125	0.605131	0.608248	1	1	G4MLL6_MAGO7	G4N0L3_MAGO7
cellular_component	GO:0005637	nuclear inner membrane	2	5	0.4	0.996072	0.0272479	1	0.999	G4N4T4_MAGO7	G4NH87_MAGO7
molecular_function	GO:0003691	double-stranded telomeric DNA binding	2	2	1	1	0.0264499	1	1	G5EHY7_MAGO7	G4N1A8_MAGO7
biological_process	GO:0000079	regulation of cyclin-dependent protein serine/threonine kinase activity	2	7	0.285714	0.907393	0.324223	1	1	G5EGW0_MAGO7	G4N357_MAGO7
biological_process	GO:0070987	error-free translesion synthesis	2	5	0.4	0.965833	0.192062	1	1	G5EH81_MAGO7	G4NBT5_MAGO7
biological_process	GO:0065003	protein-containing complex assembly	2	4	0.5	0.425033	0.650215	1	1	G4MTR3_MAGO7	G4N8S8_MAGO7
biological_process	GO:0032065	maintenance of protein location in cell cortex	2	2	1	1	0.0270343	1	1	G5EHD3_MAGO7	G4MUJ9_MAGO7
molecular_function	GO:0030600	feruloyl esterase activity	2	13	0.153846	0.643311	0.649817	1	1	G4NHP0_MAGO7	G4MQ26_MAGO7
molecular_function	GO:0008080	N-acetyltransferase activity	2	26	0.0769231	0.0447951	0.986399	0.986	1	G4NFA5_MAGO7	G4N6U8_MAGO7
biological_process	GO:0042144	vacuole fusion, non-autophagic	2	6	0.333333	0.907393	0.324223	1	1	G5EGV7_MAGO7	G4MUS5_MAGO7
biological_process	GO:0006384	transcription initiation from RNA polymerase III promoter	2	13	0.153846	0.588077	0.697312	1	1	G4NEH8_MAGO7	G4MRV6_MAGO7
cellular_component	GO:0048188	Set1C/COMPASS complex	2	6	0.333333	0.942976	0.250066	1	1	G5EI22_MAGO7	G4NCQ5_MAGO7
molecular_function	GO:0003958	NADPH-hemoprotein reductase activity	2	6	0.333333	0.941568	0.253672	1	1	G4NG13_MAGO7	G4NG44_MAGO7
cellular_component	GO:0008278	cohesin complex	2	3	0.666667	0.995825	0.0695274	1	1	G5EHS1_MAGO7	G4MMY8_MAGO7
biological_process	GO:0007062	sister chromatid cohesion	2	4	0.5	0.986505	0.0472823	1	1	G5EHS1_MAGO7	G4NIX1_MAGO7
cellular_component	GO:0032300	mismatch repair complex	2	5	0.4	0.967663	0.185718	1	1	G4NDR8_MAGO7	G4MV84_MAGO7
molecular_function	GO:0030246	carbohydrate binding	2	27	0.0740741	0.571372	0.565932	1	1	G4MT72_MAGO7	G4MKK2_MAGO7
cellular_component	GO:0005680	anaphase-promoting complex	2	10	0.2	0.790462	0.496448	1	1	G4ML42_MAGO7	G4N983_MAGO7
cellular_component	GO:0005788	endoplasmic reticulum lumen	2	4	0.5	0.967663	0.185718	1	1	G4N7Y8_MAGO7	G4MR62_MAGO7
molecular_function	GO:0016818	hydrolase activity, acting on acid anhydrides, in phosphorus-containing anhydrides	2	3	0.666667	0.305995	0.776134	1	1	G4N811_MAGO7	G4N594_MAGO7
molecular_function	GO:0016616	oxidoreductase activity, acting on the CH-OH group of donors, NAD or NADP as acceptor	2	9	0.222222	0.0028375	0.999283	0.194	1	G4N0T7_MAGO7	G4MWW7_MAGO7
biological_process	GO:0000278	mitotic cell cycle	2	8	0.25	0.999628	0.000834887	1	0.304	G4N8V4_MAGO7	G4MRV1_MAGO7
biological_process	GO:0016197	endosomal transport	2	4	0.5	0.924125	0.164507	1	1	G4MMY1_MAGO7	G4N7N3_MAGO7
biological_process	GO:0044396	actin cortical patch organization	2	9	0.222222	0.879672	0.314938	1	1	G4N5J5_MAGO7	G4NLA2_MAGO7
biological_process	GO:0045041	protein import into mitochondrial intermembrane space	2	5	0.4	0.965833	0.192062	1	1	G4N0Y7_MAGO7	G4NH61_MAGO7
biological_process	GO:0016573	histone acetylation	2	9	0.222222	0.965693	0.120328	1	1	G4N1E0_MAGO7	G4N4E8_MAGO7
molecular_function	GO:0046961	proton-transporting ATPase activity, rotational mechanism	2	10	0.2	0.786319	0.501746	1	1	G4MTR3_MAGO7	G5EHV3_MAGO7
biological_process	GO:0006751	glutathione catabolic process	2	6	0.333333	0.939907	0.258047	1	1	G4NDI0_MAGO7	G4MQ98_MAGO7
molecular_function	GO:0004198	calcium-dependent cysteine-type endopeptidase activity	2	5	0.4	0.966821	0.188592	1	1	G4N5T4_MAGO7	G4MXS6_MAGO7
biological_process	GO:0000462	maturation of SSU-rRNA from tricistronic rRNA transcript (SSU-rRNA, 5.8S rRNA, LSU-rRNA)	2	9	0.222222	0.299971	0.863097	1	1	G4NHA6_MAGO7	G4NGS5_MAGO7
biological_process	GO:0006367	transcription initiation from RNA polymerase II promoter	2	17	0.117647	0.29441	0.851474	1	1	G4NEH8_MAGO7	G4MY40_MAGO7
molecular_function	GO:0005388	P-type calcium transporter activity	2	6	0.333333	0.941568	0.253672	1	1	G4MR41_MAGO7	G4MS02_MAGO7
biological_process	GO:0030026	cellular manganese ion homeostasis	2	5	0.4	0.965833	0.192062	1	1	G4MR41_MAGO7	G4ND26_MAGO7
molecular_function	GO:0031418	L-ascorbic acid binding	2	6	0.333333	0.941568	0.253672	1	1	G4MWF7_MAGO7	G4NJ47_MAGO7
molecular_function	GO:0008324	cation transmembrane transporter activity	2	15	0.133333	0.29259	0.787379	1	1	G4MZ47_MAGO7	G4NFU3_MAGO7
biological_process	GO:0042790	nucleolar large rRNA transcription by RNA polymerase I	2	11	0.181818	0.733715	0.562068	1	1	G4N3K7_MAGO7	G4NEH8_MAGO7
biological_process	GO:0034613	cellular protein localization	2	4	0.5	0.997618	0.00412032	1	0.753	G4MU89_MAGO7	G4NH97_MAGO7
cellular_component	GO:0034515	proteasome storage granule	2	17	0.117647	0.467612	0.785644	1	1	G4NAA5_MAGO7	G5EHP6_MAGO7
cellular_component	GO:0032299	ribonuclease H2 complex	2	2	1	1	0.0259594	1	0.997	G4MRZ8_MAGO7	G4NIS7_MAGO7
cellular_component	GO:0005832	chaperonin-containing T-complex	2	8	0.25	0.875389	0.378265	1	1	G4MKN9_MAGO7	G4MTV9_MAGO7
biological_process	GO:0051086	chaperone mediated protein folding independent of cofactor	2	6	0.333333	0.939907	0.258047	1	1	G4MKN9_MAGO7	G4MTV9_MAGO7
biological_process	GO:0006388	tRNA splicing, via endonucleolytic cleavage and ligation	2	3	0.666667	0.965833	0.192062	1	1	G4N4T4_MAGO7	G4MS27_MAGO7
molecular_function	GO:0140684	histone H3-tri/dimethyl-lysine-9 demethylase activity	2	2	1	NA	NA	NA	NA	G4MPD2_MAGO7	G4MPD3_MAGO7
cellular_component	GO:0005778	peroxisomal membrane	2	10	0.2	0.711218	0.532388	1	1	G4NCH6_MAGO7	G5EHN9_MAGO7
biological_process	GO:0000727	double-strand break repair via break-induced replication	2	10	0.2	0.781341	0.508289	1	1	G4N1A8_MAGO7	G4MVC9_MAGO7
molecular_function	GO:0004518	nuclease activity	2	5	0.4	0.901775	0.156641	1	1	G4MRH6_MAGO7	G4ND24_MAGO7
molecular_function	GO:0043139	5'-3' DNA helicase activity	2	4	0.5	0.984909	0.126427	1	1	G4NAF3_MAGO7	G4N540_MAGO7
molecular_function	GO:0004737	pyruvate decarboxylase activity	2	4	0.5	0.984909	0.126427	1	1	G4N2Y7_MAGO7	G4MWQ1_MAGO7
molecular_function	GO:0030976	thiamine pyrophosphate binding	2	5	0.4	0.966821	0.188592	1	1	G4N2Y7_MAGO7	G4MWQ1_MAGO7
cellular_component	GO:0030904	retromer complex	2	3	0.666667	0.985311	0.124366	1	1	G4N4D6_MAGO7	G4MZL7_MAGO7
cellular_component	GO:0005802	trans-Golgi network	2	6	0.333333	0.942976	0.250066	1	1	G4N506_MAGO7	G4N6E8_MAGO7
biological_process	GO:0016236	macroautophagy	2	4	0.5	0.897219	0.218384	1	1	G4MR41_MAGO7	G4NKI8_MAGO7
molecular_function	GO:0036374	glutathione hydrolase activity	2	4	0.5	0.984909	0.126427	1	1	G4MQ98_MAGO7	G4N1C2_MAGO7
cellular_component	GO:0000274	mitochondrial proton-transporting ATP synthase, stator stalk	2	3	0.666667	0.995825	0.0695274	1	1	G4NAT1_MAGO7	G4MTR3_MAGO7
molecular_function	GO:0046933	proton-transporting ATP synthase activity, rotational mechanism	2	10	0.2	0.786319	0.501746	1	1	G4NAT1_MAGO7	G4MTR3_MAGO7
cellular_component	GO:0046695	SLIK (SAGA-like) complex	2	6	0.333333	0.942976	0.250066	1	1	G4NDQ9_MAGO7	G4N4E8_MAGO7
biological_process	GO:0001522	pseudouridine synthesis	2	7	0.285714	0.733715	0.562068	1	1	G4N6Z8_MAGO7	G4N8S8_MAGO7
molecular_function	GO:0015140	malate transmembrane transporter activity	2	3	0.666667	0.995705	0.0707588	1	1	G4MY83_MAGO7	G4MR25_MAGO7
cellular_component	GO:0005744	TIM23 mitochondrial import inner membrane translocase complex	2	5	0.4	0.875389	0.378265	1	1	G4MVJ5_MAGO7	G4N0J8_MAGO7
biological_process	GO:0030148	sphingolipid biosynthetic process	2	4	0.5	0.86934	0.388744	1	1	G4N522_MAGO7	G4MQE4_MAGO7
biological_process	GO:0016570	histone modification	2	5	0.4	0.962245	0.0903967	1	1	G4MR69_MAGO7	G4N775_MAGO7
molecular_function	GO:0008271	secondary active sulfate transmembrane transporter activity	2	6	0.333333	0.941568	0.253672	1	1	G4N4Q4_MAGO7	G4MZG6_MAGO7
biological_process	GO:0006379	mRNA cleavage	2	6	0.333333	0.907393	0.324223	1	1	G4N6C6_MAGO7	G4N654_MAGO7
biological_process	GO:0006378	mRNA polyadenylation	2	6	0.333333	0.907393	0.324223	1	1	G4N6C6_MAGO7	G4N654_MAGO7
molecular_function	GO:0008138	protein tyrosine/serine/threonine phosphatase activity	2	8	0.25	0.872627	0.382976	1	1	G4NH88_MAGO7	G4N549_MAGO7
molecular_function	GO:0008081	phosphoric diester hydrolase activity	2	11	0.181818	0.842023	0.29878	1	1	G4N4Z5_MAGO7	G4N9K6_MAGO7
biological_process	GO:0031297	replication fork processing	2	2	1	0.984439	0.128904	1	1	G4NAD6_MAGO7	G4N540_MAGO7
biological_process	GO:0000390	spliceosomal complex disassembly	2	2	1	1	0.0270343	1	1	G4NHA6_MAGO7	G4NFJ0_MAGO7
molecular_function	GO:0030674	protein-macromolecule adaptor activity	2	7	0.285714	0.901676	0.210953	1	1	G4MNJ5_MAGO7	G4MUV9_MAGO7
cellular_component	GO:0005639	integral component of nuclear inner membrane	2	2	1	0.995825	0.0695274	1	1	G4MX58_MAGO7	G4MX59_MAGO7
biological_process	GO:0046856	phosphatidylinositol dephosphorylation	2	7	0.285714	0.907393	0.324223	1	1	G4MS64_MAGO7	G4MP10_MAGO7
biological_process	GO:0016567	protein ubiquitination	2	8	0.25	0.955421	0.117052	1	1	G4MPR1_MAGO7	G4NCS0_MAGO7
molecular_function	GO:0008821	crossover junction endodeoxyribonuclease activity	2	2	1	1	0.0264499	1	1	G4MVT4_MAGO7	G4MSU8_MAGO7
cellular_component	GO:0016459	myosin complex	2	4	0.5	0.992349	0.0570236	1	1	G4NKK3_MAGO7	G4N0X4_MAGO7
molecular_function	GO:0003774	cytoskeletal motor activity	2	5	0.4	0.987223	0.0452063	1	1	G4NKK3_MAGO7	G4N0X4_MAGO7
cellular_component	GO:0031932	TORC2 complex	2	5	0.4	0.967663	0.185718	1	1	G4N7N3_MAGO7	G4N5P7_MAGO7
biological_process	GO:0000755	cytogamy	2	2	1	0.907393	0.324223	1	1	G4N5J5_MAGO7	G4NJ72_MAGO7
biological_process	GO:0006207	'de novo' pyrimidine nucleobase biosynthetic process	2	5	0.4	0.965833	0.192062	1	1	G4MVB1_MAGO7	G4MTF2_MAGO7
molecular_function	GO:0030276	clathrin binding	2	5	0.4	0.831071	0.444133	1	1	G4N7C0_MAGO7	G4N974_MAGO7
molecular_function	GO:0003951	NAD+ kinase activity	2	5	0.4	0.966821	0.188592	1	1	G4MLS1_MAGO7	G4MYU2_MAGO7
biological_process	GO:0019674	NAD metabolic process	2	3	0.666667	0.983258	0.0926068	1	1	G4MLS1_MAGO7	G4MYU2_MAGO7
biological_process	GO:0006741	NADP biosynthetic process	2	3	0.666667	0.995565	0.0722326	1	1	G4MLS1_MAGO7	G4MYU2_MAGO7
molecular_function	GO:0008418	protein-N-terminal asparagine amidohydrolase activity	2	3	0.666667	0.995705	0.0707588	1	1	G4MN51_MAGO7	G4NF69_MAGO7
molecular_function	GO:0070773	protein-N-terminal glutamine amidohydrolase activity	2	3	0.666667	0.995705	0.0707588	1	1	G4MN51_MAGO7	G4NF69_MAGO7
molecular_function	GO:0003950	NAD+ ADP-ribosyltransferase activity	2	2	1	1	0.0264499	1	1	G4ML01_MAGO7	G4MKT3_MAGO7
biological_process	GO:0034198	cellular response to amino acid starvation	2	2	1	0.939907	0.258047	1	1	G4MR95_MAGO7	G4MPF6_MAGO7
molecular_function	GO:0019783	ubiquitin-like protein-specific protease activity	2	2	1	0.982527	0.0486924	1	1	G4NAU1_MAGO7	G4MUL0_MAGO7
cellular_component	GO:0030286	dynein complex	2	3	0.666667	0.967663	0.185718	1	1	G4MSJ0_MAGO7	G4NH27_MAGO7
molecular_function	GO:0042803	protein homodimerization activity	2	5	0.4	0.966821	0.188592	1	1	G4N2L8_MAGO7	G4NHA0_MAGO7
cellular_component	GO:0042555	MCM complex	2	6	0.333333	0.942976	0.250066	1	1	G4MVC9_MAGO7	G4MQP3_MAGO7
cellular_component	GO:0005656	nuclear pre-replicative complex	2	6	0.333333	0.942976	0.250066	1	1	G4MVC9_MAGO7	G4MQP3_MAGO7
molecular_function	GO:0051880	G-quadruplex DNA binding	2	2	1	1	0.0264499	1	1	G4N540_MAGO7	G4N1A8_MAGO7
biological_process	GO:0000244	spliceosomal tri-snRNP complex assembly	2	2	1	1	0.0270343	1	1	G4N5D4_MAGO7	G4MPG6_MAGO7
cellular_component	GO:0000228	nuclear chromosome	2	3	0.666667	0.987994	0.0272137	1	0.997	G4N3K7_MAGO7	G4MKE0_MAGO7
cellular_component	GO:0030870	Mre11 complex	2	3	0.666667	0.995825	0.0695274	1	1	G4N1A8_MAGO7	G4MPV1_MAGO7
molecular_function	GO:0008296	3'-5'-exodeoxyribonuclease activity	2	2	1	0.995705	0.0707588	1	1	G4N1A8_MAGO7	G4MXT0_MAGO7
biological_process	GO:0009395	phospholipid catabolic process	2	2	1	0.999881	0.00315739	1	0.703	G4MTD9_MAGO7	G4MUL5_MAGO7
biological_process	GO:0031929	TOR signaling	2	4	0.5	0.999681	0.00192087	1	0.515	G4NLR2_MAGO7	G4N5P7_MAGO7
molecular_function	GO:0035243	protein-arginine omega-N symmetric methyltransferase activity	2	2	1	1	0.0264499	1	1	G4N7H9_MAGO7	G4N7B4_MAGO7
cellular_component	GO:0043625	delta DNA polymerase complex	2	2	1	1	0.0259594	1	0.997	G4MXT0_MAGO7	G4NIT0_MAGO7
molecular_function	GO:0003918	DNA topoisomerase type II (double strand cut, ATP-hydrolyzing) activity	2	2	1	1	0.0264499	1	1	G4MS23_MAGO7	G4MZZ7_MAGO7
biological_process	GO:0034508	centromere complex assembly	2	3	0.666667	0.95159	0.152292	1	1	G4NIS4_MAGO7	G4N1E3_MAGO7
molecular_function	GO:0070330	aromatase activity	2	4	0.5	0.984909	0.126427	1	1	G4NG13_MAGO7	G4NG44_MAGO7
molecular_function	GO:0004828	serine-tRNA ligase activity	2	2	1	1	0.0264499	1	1	G4N9X8_MAGO7	G4MN13_MAGO7
biological_process	GO:0097056	selenocysteinyl-tRNA(Sec) biosynthetic process	2	2	1	1	0.0270343	1	1	G4N9X8_MAGO7	G4MN13_MAGO7
biological_process	GO:0007095	mitotic G2 DNA damage checkpoint signaling	2	2	1	1	0.0270343	1	1	G4N6G2_MAGO7	G4MPV1_MAGO7
molecular_function	GO:0043138	3'-5' DNA helicase activity	1	3	0.333333	0.811408	0.588646	1	1	G4MP38_MAGO7
molecular_function	GO:0008353	RNA polymerase II CTD heptapeptide repeat kinase activity	1	2	0.5	0.97355	0.298975	1	1	SSN3_MAGO7
molecular_function	GO:0034511	U3 snoRNA binding	1	7	0.142857	0.680925	0.711736	1	1	G4MZ70_MAGO7
molecular_function	GO:0008526	phosphatidylinositol transfer activity	1	2	0.5	0.97355	0.298975	1	1	G4NDN3_MAGO7
biological_process	GO:0015914	phospholipid transport	1	5	0.2	0.675777	0.716241	1	1	G4NGP6_MAGO7
biological_process	GO:0006368	transcription elongation from RNA polymerase II promoter	1	14	0.0714286	0.218753	0.924125	1	1	G4NEH8_MAGO7
molecular_function	GO:0019899	enzyme binding	1	1	1	0.976577	0.0514062	1	1	STE20_MAGO7
molecular_function	GO:0044025	histone kinase activity (H2B-S14 specific)	1	1	1	1	0.162712	1	1	STE20_MAGO7
biological_process	GO:0007118	budding cell apical bud growth	1	1	1	0.972966	0.30205	1	1	STE20_MAGO7
biological_process	GO:0001403	invasive growth in response to glucose limitation	1	4	0.25	0.907393	0.324223	1	1	STE20_MAGO7
biological_process	GO:0010629	negative regulation of gene expression	1	1	1	0.990282	0.0214773	1	0.999	STE20_MAGO7
biological_process	GO:0043065	positive regulation of apoptotic process	1	1	1	1	0.164542	1	1	STE20_MAGO7
biological_process	GO:0007124	pseudohyphal growth	1	3	0.333333	0.871096	0.512977	1	1	STE20_MAGO7
biological_process	GO:0007096	regulation of exit from mitosis	1	3	0.333333	0.907393	0.324223	1	1	STE20_MAGO7
biological_process	GO:0001402	signal transduction involved in filamentous growth	1	1	1	1	0.164542	1	1	STE20_MAGO7
biological_process	GO:0035376	sterol import	1	1	1	1	0.164542	1	1	STE20_MAGO7
biological_process	GO:0000011	vacuole inheritance	1	2	0.5	0.972966	0.30205	1	1	STE20_MAGO7
cellular_component	GO:0005773	vacuole	1	6	0.166667	0.957942	0.073069	1	1	G4MSM2_MAGO7
biological_process	GO:0009267	cellular response to starvation	1	2	0.5	0.965693	0.120328	1	1	G4NLR2_MAGO7
biological_process	GO:0006094	gluconeogenesis	1	7	0.142857	0.847708	0.363732	1	1	G4N0N1_MAGO7
molecular_function	GO:0030515	snoRNA binding	1	12	0.0833333	0.345419	0.860373	1	1	UTP10_MAGO7
biological_process	GO:0006369	termination of RNA polymerase II transcription	1	3	0.333333	0.741953	0.660238	1	1	G4N654_MAGO7
cellular_component	GO:0000932	P-body	1	12	0.0833333	0.400716	0.87905	1	1	G4N7X5_MAGO7
biological_process	GO:0030490	maturation of SSU-rRNA	1	6	0.166667	0.29441	0.851474	1	1	UTP10_MAGO7
molecular_function	GO:0070006	metalloaminopeptidase activity	1	8	0.125	0.617024	0.758701	1	1	G4MSC1_MAGO7
biological_process	GO:0000463	maturation of LSU-rRNA from tricistronic rRNA transcript (SSU-rRNA, 5.8S rRNA, LSU-rRNA)	1	15	0.0666667	0.233185	0.944049	1	1	G4NHA6_MAGO7
cellular_component	GO:0000974	Prp19 complex	1	6	0.166667	0.749934	0.651954	1	1	G4N5D4_MAGO7
molecular_function	GO:0004608	phosphatidylethanolamine N-methyltransferase activity	1	1	1	1	0.162712	1	1	CHO2_MAGO7
biological_process	GO:0006656	phosphatidylcholine biosynthetic process	1	5	0.2	0.807938	0.593206	1	1	CHO2_MAGO7
cellular_component	GO:0005852	eukaryotic translation initiation factor 3 complex	1	6	0.166667	0.649093	0.644444	1	1	EIF3K_MAGO7
biological_process	GO:0006446	regulation of translational initiation	1	3	0.333333	0.954168	0.173075	1	1	EIF3K_MAGO7
molecular_function	GO:0004707	MAP kinase activity	1	7	0.142857	0.680925	0.711736	1	1	MCK1_MAGO7
cellular_component	GO:0071540	eukaryotic translation initiation factor 3 complex, eIF3e	1	6	0.166667	0.749934	0.651954	1	1	EIF3C_MAGO7
cellular_component	GO:0071541	eukaryotic translation initiation factor 3 complex, eIF3m	1	6	0.166667	0.749934	0.651954	1	1	EIF3C_MAGO7
cellular_component	GO:0034399	nuclear periphery	1	18	0.0555556	0.164234	0.964826	1	1	G4MPR9_MAGO7
cellular_component	GO:0005654	nucleoplasm	1	14	0.0714286	0.901234	0.152029	1	1	G4N8S8_MAGO7
molecular_function	GO:0017108	5'-flap endonuclease activity	1	4	0.25	0.873573	0.508635	1	1	G4MK85_MAGO7
biological_process	GO:0006284	base-excision repair	1	5	0.2	0.491711	0.834755	1	1	G4N1A8_MAGO7
biological_process	GO:0043137	DNA replication, removal of RNA primer	1	2	0.5	0.995565	0.0722326	1	1	G4MXT0_MAGO7
biological_process	GO:0002183	cytoplasmic translational initiation	1	4	0.25	0.576778	0.662877	1	1	DED1_MAGO7
cellular_component	GO:0043529	GET complex	1	2	0.5	0.974041	0.296464	1	1	GET3_MAGO7
molecular_function	GO:0044183	protein folding chaperone	1	2	0.5	0.97355	0.298975	1	1	GET3_MAGO7
biological_process	GO:0006620	posttranslational protein targeting to endoplasmic reticulum membrane	1	3	0.333333	0.939907	0.258047	1	1	GET3_MAGO7
biological_process	GO:0045048	protein insertion into ER membrane	1	3	0.333333	0.871096	0.512977	1	1	GET3_MAGO7
biological_process	GO:0009408	response to heat	1	4	0.25	0.781341	0.508289	1	1	GET3_MAGO7
biological_process	GO:0010038	response to metal ion	1	2	0.5	0.733715	0.562068	1	1	GET3_MAGO7
molecular_function	GO:0005092	GDP-dissociation inhibitor activity	1	3	0.333333	0.966821	0.188592	1	1	G5EHS7_MAGO7
biological_process	GO:0140469	GCN2-mediated signaling	1	2	0.5	0.972966	0.30205	1	1	G4MR95_MAGO7
biological_process	GO:1903138	negative regulation of cell wall integrity MAPK cascade	1	2	0.5	0.972966	0.30205	1	1	G4N5A5_MAGO7
biological_process	GO:1903753	negative regulation of p38MAPK cascade	1	3	0.333333	0.927767	0.416959	1	1	G4N5A5_MAGO7
biological_process	GO:0010508	positive regulation of autophagy	1	5	0.2	0.965693	0.120328	1	1	G4N8C1_MAGO7
biological_process	GO:0031139	positive regulation of conjugation with cellular fusion	1	3	0.333333	0.992675	0.0343066	1	1	G4NLR2_MAGO7
biological_process	GO:0008104	protein localization	1	3	0.333333	0.999983	3.22262e-05	1	0.013	G5EI23_MAGO7
molecular_function	GO:0070122	isopeptidase activity	1	8	0.125	0.617024	0.758701	1	1	G4N5D4_MAGO7
molecular_function	GO:0004713	protein tyrosine kinase activity	1	2	0.5	0.97355	0.298975	1	1	G4NEM6_MAGO7
cellular_component	GO:0030687	preribosome, large subunit precursor	1	17	0.0588235	0.164234	0.964826	1	1	G4MT59_MAGO7
biological_process	GO:0042273	ribosomal large subunit biogenesis	1	7	0.142857	0.148526	0.943555	1	1	G4MT59_MAGO7
cellular_component	GO:0031966	mitochondrial membrane	1	6	0.166667	0.00945905	0.994994	0.336	1	G4MRG8_MAGO7
biological_process	GO:0007015	actin filament organization	1	8	0.125	0.811913	0.339497	1	1	G4NIY0_MAGO7
biological_process	GO:0000422	autophagy of mitochondrion	1	5	0.2	0.741953	0.660238	1	1	ATG11_MAGO7
molecular_function	GO:0004185	serine-type carboxypeptidase activity	1	5	0.2	0.811408	0.588646	1	1	G4NGY2_MAGO7
cellular_component	GO:0032865	ERMES complex	1	5	0.2	0.814282	0.584973	1	1	MDM34_MAGO7
biological_process	GO:0009073	aromatic amino acid family biosynthetic process	1	5	0.2	0.437932	0.862024	1	1	G4N9G9_MAGO7
biological_process	GO:0009423	chorismate biosynthetic process	1	3	0.333333	0.927767	0.416959	1	1	G4N9G9_MAGO7
cellular_component	GO:0030659	cytoplasmic vesicle membrane	1	3	0.333333	0.887831	0.232426	1	1	GMT_MAGO7
biological_process	GO:0072659	protein localization to plasma membrane	1	1	1	0.781341	0.508289	1	1	EFR3_MAGO7
molecular_function	GO:0017070	U6 snRNA binding	1	2	0.5	0.97355	0.298975	1	1	G4N5D4_MAGO7
biological_process	GO:0008380	RNA splicing	1	19	0.0526316	0.357191	0.750002	1	1	G4ND41_MAGO7
cellular_component	GO:0005684	U2-type spliceosomal complex	1	4	0.25	0.510601	0.75585	1	1	G4NHA6_MAGO7
cellular_component	GO:0005934	cellular bud tip	1	9	0.111111	0.560934	0.794787	1	1	G4MP09_MAGO7
biological_process	GO:0016973	poly(A)+ mRNA export from nucleus	1	10	0.1	0.491711	0.834755	1	1	G4MY96_MAGO7
cellular_component	GO:0043614	multi-eIF complex	1	5	0.2	0.814282	0.584973	1	1	EIF3C_MAGO7
cellular_component	GO:0031307	integral component of mitochondrial outer membrane	1	5	0.2	0.814282	0.584973	1	1	MDM34_MAGO7
molecular_function	GO:0004128	cytochrome-b5 reductase activity, acting on NAD(P)H	1	12	0.0833333	0.39528	0.881572	1	1	G4N6N3_MAGO7
biological_process	GO:0042128	nitrate assimilation	1	4	0.25	0.871096	0.512977	1	1	NUT1_MAGO7
cellular_component	GO:0005887	integral component of plasma membrane	1	12	0.0833333	0.400716	0.87905	1	1	MSB2_MAGO7
molecular_function	GO:0005034	osmosensor activity	1	2	0.5	0.97355	0.298975	1	1	MSB2_MAGO7
molecular_function	GO:0000977	RNA polymerase II transcription regulatory region sequence-specific DNA binding	1	2	0.5	0.873573	0.508635	1	1	MIG1_MAGO7
biological_process	GO:0006465	signal peptide processing	1	8	0.125	0.611256	0.763026	1	1	G4N151_MAGO7
molecular_function	GO:0003688	DNA replication origin binding	1	10	0.1	0.498254	0.830942	1	1	G4MVC9_MAGO7
cellular_component	GO:0090575	RNA polymerase II transcription regulator complex	1	1	1	0.554376	0.654091	1	1	SWI6_MAGO7
molecular_function	GO:0001228	DNA-binding transcription activator activity, RNA polymerase II-specific	1	5	0.2	0.811408	0.588646	1	1	SWI6_MAGO7
biological_process	GO:0000289	nuclear-transcribed mRNA poly(A) tail shortening	1	5	0.2	0.907393	0.324223	1	1	G4NIN5_MAGO7
biological_process	GO:0006627	protein processing involved in protein targeting to mitochondrion	1	4	0.25	0.871096	0.512977	1	1	G4N7C7_MAGO7
biological_process	GO:0030433	ubiquitin-dependent ERAD pathway	1	20	0.05	0.101421	0.981094	1	1	G4N9U8_MAGO7
cellular_component	GO:0016592	mediator complex	1	21	0.047619	0.124953	0.975294	1	1	G4MSV0_MAGO7
molecular_function	GO:0016538	cyclin-dependent protein serine/threonine kinase regulator activity	1	7	0.142857	0.555867	0.798022	1	1	G4MMM1_MAGO7
molecular_function	GO:0005198	structural molecule activity	1	11	0.0909091	0.00212578	0.999098	0.153	1	G4NAA5_MAGO7
biological_process	GO:0045893	positive regulation of transcription, DNA-templated	1	2	0.5	0.862423	0.235176	1	1	G4N0G9_MAGO7
cellular_component	GO:0030173	integral component of Golgi membrane	1	9	0.111111	0.560934	0.794787	1	1	G4MLK4_MAGO7
molecular_function	GO:0008531	riboflavin kinase activity	1	2	0.5	0.97355	0.298975	1	1	G4N2M4_MAGO7
biological_process	GO:0009398	FMN biosynthetic process	1	2	0.5	0.972966	0.30205	1	1	G4N2M4_MAGO7
biological_process	GO:0042149	cellular response to glucose starvation	1	1	1	1	0.164542	1	1	SDS23_MAGO7
biological_process	GO:0030071	regulation of mitotic metaphase/anaphase transition	1	4	0.25	0.982256	0.0654468	1	1	SDS23_MAGO7
biological_process	GO:0000466	maturation of 5.8S rRNA from tricistronic rRNA transcript (SSU-rRNA, 5.8S rRNA, LSU-rRNA)	1	8	0.125	0.0732372	0.980521	1	1	G4NHA6_MAGO7
cellular_component	GO:0000922	spindle pole	1	6	0.166667	0.749934	0.651954	1	1	G4MW60_MAGO7
biological_process	GO:0006974	cellular response to DNA damage stimulus	1	9	0.111111	0.999997	7.23199e-06	1	0.001	G4MTA2_MAGO7
biological_process	GO:0007059	chromosome segregation	1	13	0.0769231	0.853588	0.225954	1	1	G4N8V4_MAGO7
molecular_function	GO:0031176	endo-1,4-beta-xylanase activity	1	11	0.0909091	0.444651	0.858501	1	1	G4NIM7_MAGO7
cellular_component	GO:0030014	CCR4-NOT complex	1	4	0.25	0.972752	0.124611	1	1	G4MYM6_MAGO7
biological_process	GO:0071528	tRNA re-export from nucleus	1	1	1	1	0.164542	1	1	XPOT_MAGO7
cellular_component	GO:0031305	integral component of mitochondrial inner membrane	1	4	0.25	0.875389	0.378265	1	1	YME2_MAGO7
molecular_function	GO:0004792	thiosulfate sulfurtransferase activity	1	3	0.333333	0.929241	0.413083	1	1	G4NG26_MAGO7
molecular_function	GO:0004555	alpha,alpha-trehalase activity	1	2	0.5	0.97355	0.298975	1	1	G4MY35_MAGO7
molecular_function	GO:0004865	protein serine/threonine phosphatase inhibitor activity	1	1	1	1	0.162712	1	1	YPI1_MAGO7
biological_process	GO:0032515	negative regulation of phosphoprotein phosphatase activity	1	1	1	1	0.164542	1	1	YPI1_MAGO7
molecular_function	GO:0008171	O-methyltransferase activity	1	18	0.0555556	0.0593708	0.990237	1	1	G4N0L3_MAGO7
biological_process	GO:0075016	appressorium formation	1	3	0.333333	0.741953	0.660238	1	1	G5EHL3_MAGO7
biological_process	GO:0031222	arabinan catabolic process	1	6	0.166667	0.741953	0.660238	1	1	G4MQZ5_MAGO7
cellular_component	GO:0045160	myosin I complex	1	1	1	1	0.161212	1	1	MYO1_MAGO7
cellular_component	GO:0044853	plasma membrane raft	1	1	1	1	0.161212	1	1	MYO1_MAGO7
molecular_function	GO:0071933	Arp2/3 complex binding	1	2	0.5	0.97355	0.298975	1	1	MYO1_MAGO7
molecular_function	GO:0000146	microfilament motor activity	1	1	1	1	0.162712	1	1	MYO1_MAGO7
biological_process	GO:0000147	actin cortical patch assembly	1	3	0.333333	0.927767	0.416959	1	1	MYO1_MAGO7
biological_process	GO:0044855	plasma membrane raft distribution	1	1	1	1	0.164542	1	1	MYO1_MAGO7
biological_process	GO:0030838	positive regulation of actin filament polymerization	1	1	1	0.934553	0.187029	1	1	MYO1_MAGO7
molecular_function	GO:0080025	phosphatidylinositol-3,5-bisphosphate binding	1	3	0.333333	0.929241	0.413083	1	1	G4MUR7_MAGO7
molecular_function	GO:0070273	phosphatidylinositol-4-phosphate binding	1	5	0.2	0.811408	0.588646	1	1	G4NE21_MAGO7
biological_process	GO:0034638	phosphatidylcholine catabolic process	1	1	1	1	0.164542	1	1	NTE1_MAGO7
biological_process	GO:0071071	regulation of phospholipid biosynthetic process	1	1	1	0.995565	0.0722326	1	1	NTE1_MAGO7
molecular_function	GO:0004017	adenylate kinase activity	1	4	0.25	0.873573	0.508635	1	1	G4N1A8_MAGO7
cellular_component	GO:0005952	cAMP-dependent protein kinase complex	1	2	0.5	0.974041	0.296464	1	1	G4N7T3_MAGO7
molecular_function	GO:0005458	GDP-mannose transmembrane transporter activity	1	1	1	1	0.162712	1	1	GMT_MAGO7
cellular_component	GO:0097361	CIA complex	1	3	0.333333	0.930473	0.409933	1	1	G4MYW3_MAGO7
cellular_component	GO:0071007	U2-type catalytic step 2 spliceosome	1	2	0.5	0.974041	0.296464	1	1	G4NFJ0_MAGO7
cellular_component	GO:0017119	Golgi transport complex	1	4	0.25	0.875634	0.505122	1	1	G4MNJ2_MAGO7
biological_process	GO:0006891	intra-Golgi vesicle-mediated transport	1	8	0.125	0.611256	0.763026	1	1	G4MLK4_MAGO7
molecular_function	GO:0102265	tRNA-dihydrouridine47 synthase activity	1	4	0.25	0.873573	0.508635	1	1	G4MUR1_MAGO7
biological_process	GO:0006097	glyoxylate cycle	1	2	0.5	0.972966	0.30205	1	1	G4NIW7_MAGO7
molecular_function	GO:0004100	chitin synthase activity	1	7	0.142857	0.680925	0.711736	1	1	G4N0X4_MAGO7
molecular_function	GO:0008239	dipeptidyl-peptidase activity	1	7	0.142857	0.680925	0.711736	1	1	G4MSC1_MAGO7
molecular_function	GO:0051537	2 iron, 2 sulfur cluster binding	1	18	0.0555556	0.183496	0.959325	1	1	G4MVI0_MAGO7
molecular_function	GO:0004525	ribonuclease III activity	1	7	0.142857	0.680925	0.711736	1	1	DCL1_MAGO7
biological_process	GO:0051607	defense response to virus	1	3	0.333333	0.927767	0.416959	1	1	DCL1_MAGO7
biological_process	GO:0050688	regulation of defense response to virus	1	2	0.5	0.972966	0.30205	1	1	DCL1_MAGO7
molecular_function	GO:0005216	ion channel activity	1	3	0.333333	0.760744	0.419808	1	1	G4N5I5_MAGO7
molecular_function	GO:0008233	peptidase activity	1	20	0.05	0.740639	0.316608	1	1	G4NAD8_MAGO7
biological_process	GO:0008299	isoprenoid biosynthetic process	1	9	0.111111	0.461649	0.755354	1	1	G4MUV8_MAGO7
molecular_function	GO:0030544	Hsp70 protein binding	1	5	0.2	0.811408	0.588646	1	1	G4N0J8_MAGO7
molecular_function	GO:1990663	dihydroorotate dehydrogenase (fumarate) activity	1	1	1	1	0.162712	1	1	G4MUI6_MAGO7
molecular_function	GO:0004061	arylformamidase activity	1	4	0.25	0.873573	0.508635	1	1	G4NAM1_MAGO7
molecular_function	GO:0008483	transaminase activity	1	9	0.111111	0.435679	0.773919	1	1	G4MN85_MAGO7
molecular_function	GO:0008131	primary amine oxidase activity	1	7	0.142857	0.680925	0.711736	1	1	G5EH07_MAGO7
molecular_function	GO:0048038	quinone binding	1	10	0.1	0.444651	0.858501	1	1	G5EH07_MAGO7
biological_process	GO:0009308	amine metabolic process	1	7	0.142857	0.328734	0.845626	1	1	G5EH07_MAGO7
molecular_function	GO:0016158	3-phytase activity	1	8	0.125	0.617024	0.758701	1	1	G4N003_MAGO7
molecular_function	GO:0010997	anaphase-promoting complex binding	1	4	0.25	0.873573	0.508635	1	1	G4MMY6_MAGO7
molecular_function	GO:0003935	GTP cyclohydrolase II activity	1	2	0.5	0.97355	0.298975	1	1	G4N9R2_MAGO7
molecular_function	GO:0030619	U1 snRNA binding	1	3	0.333333	0.929241	0.413083	1	1	G4N5D4_MAGO7
molecular_function	GO:0016779	nucleotidyltransferase activity	1	7	0.142857	0.489994	0.63232	1	1	G4NBT5_MAGO7
biological_process	GO:0006265	DNA topological change	1	3	0.333333	0.927767	0.416959	1	1	G4MZZ7_MAGO7
biological_process	GO:0006520	cellular amino acid metabolic process	1	8	0.125	0.0140683	0.992272	0.836	1	G4NIQ1_MAGO7
cellular_component	GO:0000923	equatorial microtubule organizing center	1	3	0.333333	0.930473	0.409933	1	1	G4MW60_MAGO7
cellular_component	GO:0000930	gamma-tubulin complex	1	3	0.333333	0.875634	0.505122	1	1	G4MW60_MAGO7
cellular_component	GO:0061496	half bridge of mitotic spindle pole body	1	3	0.333333	0.930473	0.409933	1	1	G4MW60_MAGO7
cellular_component	GO:0061497	inner plaque of mitotic spindle pole body	1	3	0.333333	0.930473	0.409933	1	1	G4MW60_MAGO7
cellular_component	GO:0071957	old mitotic spindle pole body	1	3	0.333333	0.930473	0.409933	1	1	G4MW60_MAGO7
biological_process	GO:0031122	cytoplasmic microtubule organization	1	4	0.25	0.871096	0.512977	1	1	G4MW60_MAGO7
biological_process	GO:0007020	microtubule nucleation	1	6	0.166667	0.741953	0.660238	1	1	G4MW60_MAGO7
biological_process	GO:1902408	mitotic cytokinesis, site selection	1	2	0.5	0.972966	0.30205	1	1	G4MY59_MAGO7
biological_process	GO:1902626	assembly of large subunit precursor of preribosome	1	6	0.166667	0.741953	0.660238	1	1	G4MT59_MAGO7
biological_process	GO:0000054	ribosomal subunit export from nucleus	1	5	0.2	0.266011	0.932972	1	1	G4MT59_MAGO7
biological_process	GO:0000375	RNA splicing, via transesterification reactions	1	1	1	0.486098	0.653602	1	1	G4NCF8_MAGO7
cellular_component	GO:0005826	actomyosin contractile ring	1	1	1	0.9119	0.314852	1	1	G4N9X0_MAGO7
biological_process	GO:0000920	septum digestion after cytokinesis	1	2	0.5	0.871096	0.512977	1	1	G4N9X0_MAGO7
cellular_component	GO:0000818	nuclear MIS12/MIND complex	1	2	0.5	0.974041	0.296464	1	1	G4MTB0_MAGO7
molecular_function	GO:0004107	chorismate synthase activity	1	1	1	1	0.162712	1	1	G4N9G9_MAGO7
molecular_function	GO:0042602	riboflavin reductase (NADPH) activity	1	1	1	1	0.162712	1	1	G4N9G9_MAGO7
cellular_component	GO:0015630	microtubule cytoskeleton	1	1	1	0.930805	0.11779	1	1	G5EI23_MAGO7
cellular_component	GO:0031500	Tea1 cell-end complex	1	1	1	1	0.161212	1	1	G5EI23_MAGO7
biological_process	GO:0051519	activation of bipolar cell growth	1	1	1	1	0.164542	1	1	G5EI23_MAGO7
biological_process	GO:0042815	bipolar cell growth	1	1	1	1	0.164542	1	1	G5EI23_MAGO7
biological_process	GO:0030010	establishment of cell polarity	1	3	0.333333	0.998136	0.0167419	1	0.999	G5EI23_MAGO7
biological_process	GO:0007163	establishment or maintenance of cell polarity	1	2	0.5	0.998005	0.00769984	1	0.959	G5EI23_MAGO7
cellular_component	GO:1990904	ribonucleoprotein complex	1	6	0.166667	0.000830905	0.999613	0.035	1	G4MT27_MAGO7
biological_process	GO:0000338	protein deneddylation	1	5	0.2	0.807938	0.593206	1	1	G5EHP6_MAGO7
cellular_component	GO:0042788	polysomal ribosome	1	2	0.5	0.974041	0.296464	1	1	G4MR95_MAGO7
cellular_component	GO:0015935	small ribosomal subunit	1	5	0.2	0.108739	0.979295	1	1	G4NGF2_MAGO7
biological_process	GO:0060548	negative regulation of cell death	1	3	0.333333	0.927767	0.416959	1	1	G4N4D6_MAGO7
biological_process	GO:0006450	regulation of translational fidelity	1	5	0.2	0.86934	0.388744	1	1	G4NC81_MAGO7
molecular_function	GO:0003713	transcription coactivator activity	1	5	0.2	0.811408	0.588646	1	1	G4N4E8_MAGO7
cellular_component	GO:0000324	fungal-type vacuole	1	6	0.166667	0.967067	0.0735067	1	1	G4N7T3_MAGO7
cellular_component	GO:0000220	vacuolar proton-transporting V-type ATPase, V0 domain	1	4	0.25	0.875634	0.505122	1	1	G4NH40_MAGO7
molecular_function	GO:0015078	proton transmembrane transporter activity	1	11	0.0909091	0.410431	0.743619	1	1	G4NH40_MAGO7
molecular_function	GO:0000293	ferric-chelate reductase activity	1	12	0.0833333	0.39528	0.881572	1	1	G4MX75_MAGO7
biological_process	GO:0006826	iron ion transport	1	6	0.166667	0.491711	0.834755	1	1	G4MX75_MAGO7
biological_process	GO:0006013	mannose metabolic process	1	4	0.25	0.871096	0.512977	1	1	G4MKK2_MAGO7
cellular_component	GO:0043231	intracellular membrane-bounded organelle	1	7	0.142857	1	1.77266e-10	1	0	G4MZZ7_MAGO7
molecular_function	GO:0003885	D-arabinono-1,4-lactone oxidase activity	1	2	0.5	0.97355	0.298975	1	1	G4MRG8_MAGO7
molecular_function	GO:0016279	protein-lysine N-methyltransferase activity	1	6	0.166667	0.643311	0.649817	1	1	G4MYP6_MAGO7
molecular_function	GO:0047617	acyl-CoA hydrolase activity	1	7	0.142857	0.680925	0.711736	1	1	G4NEK9_MAGO7
biological_process	GO:0006878	cellular copper ion homeostasis	1	11	0.0909091	0.437932	0.862024	1	1	G4MQ43_MAGO7
biological_process	GO:0006631	fatty acid metabolic process	1	3	0.333333	0.943815	0.107519	1	1	G4N0T7_MAGO7
biological_process	GO:0045860	positive regulation of protein kinase activity	1	1	1	0.871096	0.512977	1	1	G5EHL3_MAGO7
biological_process	GO:0051726	regulation of cell cycle	1	4	0.25	0.99992	0.000223562	1	0.08	G5EHL3_MAGO7
cellular_component	GO:0031201	SNARE complex	1	5	0.2	0.814282	0.584973	1	1	G4NGR4_MAGO7
biological_process	GO:0048280	vesicle fusion with Golgi apparatus	1	4	0.25	0.871096	0.512977	1	1	G4NGR4_MAGO7
cellular_component	GO:0005666	RNA polymerase III complex	1	15	0.0666667	0.277457	0.928741	1	1	G4NEH8_MAGO7
molecular_function	GO:0001056	RNA polymerase III activity	1	10	0.1	0.498254	0.830942	1	1	G4NEH8_MAGO7
biological_process	GO:0006386	termination of RNA polymerase III transcription	1	10	0.1	0.491711	0.834755	1	1	G4NEH8_MAGO7
biological_process	GO:0042797	tRNA transcription by RNA polymerase III	1	11	0.0909091	0.437932	0.862024	1	1	G4NEH8_MAGO7
cellular_component	GO:0030915	Smc5-Smc6 complex	1	5	0.2	0.814282	0.584973	1	1	G4NIX1_MAGO7
biological_process	GO:0008654	phospholipid biosynthetic process	1	7	0.142857	0.104115	0.951225	1	1	G4MYK3_MAGO7
cellular_component	GO:0005777	peroxisome	1	13	0.0769231	0.366369	0.802709	1	1	G4NKI8_MAGO7
molecular_function	GO:0004527	exonuclease activity	1	10	0.1	0.716331	0.454223	1	1	G4N4M9_MAGO7
molecular_function	GO:0004197	cysteine-type endopeptidase activity	1	3	0.333333	0.955741	0.168929	1	1	G4N8I2_MAGO7
molecular_function	GO:0003991	acetylglutamate kinase activity	1	1	1	1	0.162712	1	1	G5EH72_MAGO7
molecular_function	GO:0003942	N-acetyl-gamma-glutamyl-phosphate reductase activity	1	1	1	1	0.162712	1	1	G5EH72_MAGO7
molecular_function	GO:0004851	uroporphyrin-III C-methyltransferase activity	1	1	1	1	0.162712	1	1	G5EH93_MAGO7
biological_process	GO:0019354	siroheme biosynthetic process	1	2	0.5	0.972966	0.30205	1	1	G5EH93_MAGO7
biological_process	GO:0000103	sulfate assimilation	1	6	0.166667	0.675777	0.716241	1	1	G5EH93_MAGO7
molecular_function	GO:0005375	copper ion transmembrane transporter activity	1	9	0.111111	0.555867	0.798022	1	1	G4MQ43_MAGO7
molecular_function	GO:0004181	metallocarboxypeptidase activity	1	11	0.0909091	0.444651	0.858501	1	1	G4NAH8_MAGO7
biological_process	GO:0006271	DNA strand elongation involved in DNA replication	1	7	0.142857	0.866509	0.302334	1	1	G4MVC9_MAGO7
biological_process	GO:0000183	rDNA heterochromatin assembly	1	5	0.2	0.807938	0.593206	1	1	G4N4E8_MAGO7
molecular_function	GO:0003697	single-stranded DNA binding	1	21	0.047619	0.142798	0.955772	1	1	G4NE59_MAGO7
biological_process	GO:1901255	nucleotide-excision repair involved in interstrand cross-link repair	1	1	1	1	0.164542	1	1	G4NE59_MAGO7
cellular_component	GO:1990023	mitotic spindle midzone	1	6	0.166667	0.749934	0.651954	1	1	G4MPR9_MAGO7
biological_process	GO:0034067	protein localization to Golgi apparatus	1	4	0.25	0.826925	0.450363	1	1	G4NE21_MAGO7
biological_process	GO:0006479	protein methylation	1	7	0.142857	0.177984	0.961021	1	1	G4MTG8_MAGO7
biological_process	GO:0045053	protein retention in Golgi apparatus	1	5	0.2	0.807938	0.593206	1	1	G4N4D6_MAGO7
molecular_function	GO:0050072	m7G(5')pppN diphosphatase activity	1	3	0.333333	0.929241	0.413083	1	1	G4N7I3_MAGO7
molecular_function	GO:0031625	ubiquitin protein ligase binding	1	8	0.125	0.617024	0.758701	1	1	G4MTP9_MAGO7
molecular_function	GO:0003910	DNA ligase (ATP) activity	1	4	0.25	0.873573	0.508635	1	1	G4MQC2_MAGO7
molecular_function	GO:0003980	UDP-glucose:glycoprotein glucosyltransferase activity	1	1	1	1	0.162712	1	1	G4N7Y8_MAGO7
biological_process	GO:0000272	polysaccharide catabolic process	1	38	0.0263158	0.0894945	0.950358	1	1	G4NCF7_MAGO7
cellular_component	GO:0016035	zeta DNA polymerase complex	1	1	1	1	0.161212	1	1	G4NL37_MAGO7
biological_process	GO:0019985	translesion synthesis	1	2	0.5	0.983258	0.0926068	1	1	G4NL37_MAGO7
cellular_component	GO:0030123	AP-3 adaptor complex	1	3	0.333333	0.930473	0.409933	1	1	G4MW99_MAGO7
biological_process	GO:0031204	posttranslational protein targeting to membrane, translocation	1	4	0.25	0.871096	0.512977	1	1	G4N042_MAGO7
biological_process	GO:0016540	protein autoprocessing	1	3	0.333333	0.927767	0.416959	1	1	G4N6E8_MAGO7
molecular_function	GO:0097027	ubiquitin-protein transferase activator activity	1	3	0.333333	0.929241	0.413083	1	1	G4MMY6_MAGO7
biological_process	GO:1904668	positive regulation of ubiquitin protein ligase activity	1	3	0.333333	0.927767	0.416959	1	1	G4MMY6_MAGO7
molecular_function	GO:0042123	glucanosyltransferase activity	1	2	0.5	0.97355	0.298975	1	1	G4MLP9_MAGO7
biological_process	GO:0071840	cellular component organization or biogenesis	1	2	0.5	0.572557	0.471581	1	1	G4MLP9_MAGO7
biological_process	GO:0071852	fungal-type cell wall organization or biogenesis	1	3	0.333333	0.195162	0.934498	1	1	G4MLP9_MAGO7
biological_process	GO:0097428	protein maturation by iron-sulfur cluster transfer	1	3	0.333333	0.741953	0.660238	1	1	G4MYW3_MAGO7
biological_process	GO:0016482	cytosolic transport	1	2	0.5	0.982256	0.0654468	1	1	G4MMY1_MAGO7
biological_process	GO:0007034	vacuolar transport	1	13	0.0769231	0.505139	0.664466	1	1	G4N827_MAGO7
biological_process	GO:0000027	ribosomal large subunit assembly	1	13	0.0769231	0.343458	0.903821	1	1	G4N7L9_MAGO7
biological_process	GO:0016572	histone phosphorylation	1	1	1	1	0.164542	1	1	G4MVM3_MAGO7
cellular_component	GO:0005885	Arp2/3 protein complex	1	7	0.142857	0.685148	0.708138	1	1	G4NLA2_MAGO7
biological_process	GO:0034314	Arp2/3 complex-mediated actin nucleation	1	7	0.142857	0.847708	0.363732	1	1	G4NLA2_MAGO7
biological_process	GO:0030833	regulation of actin filament polymerization	1	5	0.2	0.980977	0.061412	1	1	G4NLA2_MAGO7
cellular_component	GO:0000176	nuclear exosome (RNase complex)	1	10	0.1	0.503552	0.827936	1	1	G4MKT8_MAGO7
molecular_function	GO:0030234	enzyme regulator activity	1	6	0.166667	1	1.24829e-07	1	0	G4NDR0_MAGO7
biological_process	GO:0045842	positive regulation of mitotic metaphase/anaphase transition	1	4	0.25	0.807938	0.593206	1	1	G4ML42_MAGO7
cellular_component	GO:0042645	mitochondrial nucleoid	1	8	0.125	0.560934	0.794787	1	1	G4MW52_MAGO7
biological_process	GO:0009097	isoleucine biosynthetic process	1	6	0.166667	0.741953	0.660238	1	1	G4MW52_MAGO7
biological_process	GO:0009099	valine biosynthetic process	1	4	0.25	0.871096	0.512977	1	1	G4MW52_MAGO7
molecular_function	GO:0035925	mRNA 3'-UTR AU-rich region binding	1	1	1	1	0.162712	1	1	G4N5A5_MAGO7
biological_process	GO:0070935	3'-UTR-mediated mRNA stabilization	1	1	1	1	0.164542	1	1	G4N5A5_MAGO7
cellular_component	GO:0005721	pericentric heterochromatin	1	8	0.125	0.621735	0.755262	1	1	G4NIS4_MAGO7
biological_process	GO:0071586	CAAX-box protein processing	1	2	0.5	0.972966	0.30205	1	1	G4MNG8_MAGO7
biological_process	GO:0032968	positive regulation of transcription elongation from RNA polymerase II promoter	1	10	0.1	0.491711	0.834755	1	1	G4NKI8_MAGO7
molecular_function	GO:0043047	single-stranded telomeric DNA binding	1	7	0.142857	0.680925	0.711736	1	1	G4N1A8_MAGO7
molecular_function	GO:0043015	gamma-tubulin binding	1	5	0.2	0.811408	0.588646	1	1	G4MW60_MAGO7
biological_process	GO:0090307	mitotic spindle assembly	1	3	0.333333	0.871096	0.512977	1	1	G4MW60_MAGO7
biological_process	GO:0006383	transcription by RNA polymerase III	1	4	0.25	0.461649	0.755354	1	1	G4N851_MAGO7
molecular_function	GO:2001070	starch binding	1	3	0.333333	0.929241	0.413083	1	1	G4NCF7_MAGO7
cellular_component	GO:0005736	RNA polymerase I complex	1	7	0.142857	0.685148	0.708138	1	1	G4NEH8_MAGO7
cellular_component	GO:0005665	RNA polymerase II, core complex	1	11	0.0909091	0.450067	0.855736	1	1	G4NEH8_MAGO7
molecular_function	GO:0001054	RNA polymerase I activity	1	7	0.142857	0.680925	0.711736	1	1	G4NEH8_MAGO7
molecular_function	GO:0001055	RNA polymerase II activity	1	7	0.142857	0.680925	0.711736	1	1	G4NEH8_MAGO7
biological_process	GO:0006363	termination of RNA polymerase I transcription	1	7	0.142857	0.675777	0.716241	1	1	G4NEH8_MAGO7
biological_process	GO:0006362	transcription elongation from RNA polymerase I promoter	1	8	0.125	0.611256	0.763026	1	1	G4NEH8_MAGO7
biological_process	GO:0006361	transcription initiation from RNA polymerase I promoter	1	7	0.142857	0.611256	0.763026	1	1	G4NEH8_MAGO7
biological_process	GO:0009968	negative regulation of signal transduction	1	1	1	0.998385	0.00713043	1	0.947	G4MSZ4_MAGO7
molecular_function	GO:0008408	3'-5' exonuclease activity	1	4	0.25	0.818219	0.404391	1	1	G4N6B1_MAGO7
molecular_function	GO:0030295	protein kinase activator activity	1	3	0.333333	0.811408	0.588646	1	1	G4MR95_MAGO7
biological_process	GO:0019346	transsulfuration	1	8	0.125	0.611256	0.763026	1	1	G4MYI6_MAGO7
biological_process	GO:0042176	regulation of protein catabolic process	1	3	0.333333	0.675777	0.716241	1	1	G4NDR0_MAGO7
biological_process	GO:0033567	DNA replication, Okazaki fragment processing	1	2	0.5	0.927767	0.416959	1	1	G4MK85_MAGO7
cellular_component	GO:0030121	AP-1 adaptor complex	1	3	0.333333	0.930473	0.409933	1	1	G4MMY1_MAGO7
cellular_component	GO:0097002	mitochondrial inner boundary membrane	1	2	0.5	0.974041	0.296464	1	1	G4N151_MAGO7
molecular_function	GO:0001786	phosphatidylserine binding	1	2	0.5	0.97355	0.298975	1	1	G4N4E8_MAGO7
biological_process	GO:0000001	mitochondrion inheritance	1	6	0.166667	0.741953	0.660238	1	1	G4N4P3_MAGO7
molecular_function	GO:0004069	L-aspartate:2-oxoglutarate aminotransferase activity	1	3	0.333333	0.929241	0.413083	1	1	G4NIQ1_MAGO7
molecular_function	GO:1901363	heterocyclic compound binding	1	8	0.125	0.999999	1.51557e-06	1	0	G4NG86_MAGO7
molecular_function	GO:0097159	organic cyclic compound binding	1	8	0.125	0.999999	1.82794e-06	1	0	G4NG86_MAGO7
biological_process	GO:0002098	tRNA wobble uridine modification	1	13	0.0769231	0.373072	0.844968	1	1	G4N648_MAGO7
molecular_function	GO:0005262	calcium channel activity	1	1	1	0.995705	0.0707588	1	1	G4NGX3_MAGO7
biological_process	GO:0098703	calcium ion import across plasma membrane	1	1	1	0.927767	0.416959	1	1	G4NGX3_MAGO7
cellular_component	GO:0030289	protein phosphatase 4 complex	1	2	0.5	0.974041	0.296464	1	1	G4MSF0_MAGO7
biological_process	GO:0000724	double-strand break repair via homologous recombination	1	5	0.2	0.882948	0.255544	1	1	G4NIX1_MAGO7
biological_process	GO:0051598	meiotic recombination checkpoint signaling	1	2	0.5	0.972966	0.30205	1	1	G4N6G2_MAGO7
biological_process	GO:0000480	endonucleolytic cleavage in 5'-ETS of tricistronic rRNA transcript (SSU-rRNA, 5.8S rRNA, LSU-rRNA)	1	14	0.0714286	0.302688	0.919706	1	1	G4MZ70_MAGO7
biological_process	GO:0000447	endonucleolytic cleavage in ITS1 to separate SSU-rRNA from 5.8S rRNA and LSU-rRNA from tricistronic rRNA transcript (SSU-rRNA, 5.8S rRNA, LSU-rRNA)	1	17	0.0588235	0.203938	0.953298	1	1	G4MZ70_MAGO7
biological_process	GO:0000472	endonucleolytic cleavage to generate mature 5'-end of SSU-rRNA from (SSU-rRNA, 5.8S rRNA, LSU-rRNA)	1	15	0.0666667	0.266011	0.932972	1	1	G4MZ70_MAGO7
cellular_component	GO:0030133	transport vesicle	1	1	1	0.987874	0.0433839	1	1	G4N599_MAGO7
molecular_function	GO:0004160	dihydroxy-acid dehydratase activity	1	2	0.5	0.97355	0.298975	1	1	G4MKI2_MAGO7
biological_process	GO:0009082	branched-chain amino acid biosynthetic process	1	3	0.333333	0.826925	0.450363	1	1	G4MKI2_MAGO7
biological_process	GO:0060237	regulation of fungal-type cell wall organization	1	4	0.25	0.871096	0.512977	1	1	G4NFW8_MAGO7
cellular_component	GO:0034388	Pwp2p-containing subcomplex of 90S preribosome	1	4	0.25	0.875634	0.505122	1	1	G4MZ70_MAGO7
biological_process	GO:1904515	positive regulation of TORC2 signaling	1	1	1	1	0.164542	1	1	G4NIR6_MAGO7
molecular_function	GO:0035673	oligopeptide transmembrane transporter activity	1	12	0.0833333	0.39528	0.881572	1	1	G4ND12_MAGO7
biological_process	GO:0000747	conjugation with cellular fusion	1	2	0.5	0.986261	0.0377555	1	1	G4MUV9_MAGO7
molecular_function	GO:0015450	protein-transporting ATPase activity	1	2	0.5	0.97355	0.298975	1	1	G4ND44_MAGO7
cellular_component	GO:0031981	nuclear lumen	1	3	0.333333	0.550647	0.516964	1	1	G4NB99_MAGO7
molecular_function	GO:0003972	RNA ligase (ATP) activity	1	2	0.5	0.97355	0.298975	1	1	G4N4T4_MAGO7
biological_process	GO:0000256	allantoin catabolic process	1	2	0.5	0.927767	0.416959	1	1	G4MYC2_MAGO7
cellular_component	GO:0005869	dynactin complex	1	4	0.25	0.875634	0.505122	1	1	G5EI03_MAGO7
cellular_component	GO:0000347	THO complex	1	1	1	1	0.0259594	1	0.997	G4MSK2_MAGO7
biological_process	GO:0016560	protein import into peroxisome matrix, docking	1	4	0.25	0.871096	0.512977	1	1	G4NCH6_MAGO7
molecular_function	GO:0015127	bilirubin transmembrane transporter activity	1	1	1	1	0.162712	1	1	G4MUS5_MAGO7
molecular_function	GO:0015086	cadmium ion transmembrane transporter activity	1	1	1	1	0.162712	1	1	G4MUS5_MAGO7
molecular_function	GO:0043014	alpha-tubulin binding	1	1	1	1	0.162712	1	1	G4NCM1_MAGO7
cellular_component	GO:0071162	CMG complex	1	8	0.125	0.621735	0.755262	1	1	G4MVC9_MAGO7
biological_process	GO:1902983	DNA strand elongation involved in mitotic DNA replication	1	2	0.5	0.984439	0.128904	1	1	G4N540_MAGO7
biological_process	GO:0006268	DNA unwinding involved in DNA replication	1	8	0.125	0.611256	0.763026	1	1	G4MVC9_MAGO7
biological_process	GO:1902975	mitotic DNA replication initiation	1	4	0.25	0.871096	0.512977	1	1	G4MVC9_MAGO7
molecular_function	GO:0008199	ferric iron binding	1	5	0.2	0.811408	0.588646	1	1	G5EHX9_MAGO7
cellular_component	GO:0097255	R2TP complex	1	2	0.5	0.974041	0.296464	1	1	G4NAF3_MAGO7
molecular_function	GO:0019829	ATPase-coupled cation transmembrane transporter activity	1	8	0.125	0.863475	0.268608	1	1	G4N3A4_MAGO7
molecular_function	GO:0004435	phosphatidylinositol phospholipase C activity	1	5	0.2	0.811408	0.588646	1	1	G4MRV2_MAGO7
molecular_function	GO:0070573	metallodipeptidase activity	1	3	0.333333	0.929241	0.413083	1	1	G4NDI0_MAGO7
molecular_function	GO:0008242	omega peptidase activity	1	1	1	0.996119	0.013295	1	0.943	G4NDI0_MAGO7
biological_process	GO:0045899	positive regulation of RNA polymerase II transcription preinitiation complex assembly	1	7	0.142857	0.675777	0.716241	1	1	G4MU89_MAGO7
cellular_component	GO:0000151	ubiquitin ligase complex	1	2	0.5	0.870004	0.274623	1	1	G4N9U8_MAGO7
molecular_function	GO:0034450	ubiquitin-ubiquitin ligase activity	1	1	1	1	0.162712	1	1	G4N9U8_MAGO7
molecular_function	GO:0000030	mannosyltransferase activity	1	6	0.166667	0.401539	0.797845	1	1	G4MQE4_MAGO7
cellular_component	GO:0005682	U5 snRNP	1	8	0.125	0.621735	0.755262	1	1	G4N5D4_MAGO7
cellular_component	GO:0048476	Holliday junction resolvase complex	1	1	1	1	0.161212	1	1	G4MRH6_MAGO7
molecular_function	GO:0008553	P-type proton-exporting transporter activity	1	3	0.333333	0.929241	0.413083	1	1	G4MU02_MAGO7
biological_process	GO:0010499	proteasomal ubiquitin-independent protein catabolic process	1	14	0.0714286	0.302688	0.919706	1	1	G4NBY3_MAGO7
biological_process	GO:0000160	phosphorelay signal transduction system	1	5	0.2	0.807938	0.593206	1	1	G4NCR0_MAGO7
molecular_function	GO:0070628	proteasome binding	1	6	0.166667	0.746328	0.655641	1	1	G4NGD9_MAGO7
biological_process	GO:0042276	error-prone translesion synthesis	1	3	0.333333	0.927767	0.416959	1	1	G4NBT5_MAGO7
biological_process	GO:0042138	meiotic DNA double-strand break formation	1	2	0.5	0.965833	0.192062	1	1	G4MS23_MAGO7
biological_process	GO:0031571	mitotic G1 DNA damage checkpoint signaling	1	3	0.333333	0.927767	0.416959	1	1	G4MR95_MAGO7
biological_process	GO:0071596	ubiquitin-dependent protein catabolic process via the N-end rule pathway	1	3	0.333333	0.927767	0.416959	1	1	G4MX10_MAGO7
molecular_function	GO:0046873	metal ion transmembrane transporter activity	1	12	0.0833333	0.618753	0.525831	1	1	G4N7T2_MAGO7
biological_process	GO:0015693	magnesium ion transport	1	5	0.2	0.741953	0.660238	1	1	G4N7T2_MAGO7
molecular_function	GO:0000215	tRNA 2'-phosphotransferase activity	1	1	1	1	0.162712	1	1	G4N5A6_MAGO7
molecular_function	GO:0009922	fatty acid elongase activity	1	2	0.5	0.97355	0.298975	1	1	G4MUK6_MAGO7
molecular_function	GO:0102756	very-long-chain 3-ketoacyl-CoA synthase activity	1	2	0.5	0.97355	0.298975	1	1	G4MUK6_MAGO7
biological_process	GO:0043983	histone H4-K12 acetylation	1	1	1	1	0.164542	1	1	G4MXK8_MAGO7
biological_process	GO:0043981	histone H4-K5 acetylation	1	1	1	1	0.164542	1	1	G4MXK8_MAGO7
biological_process	GO:0043982	histone H4-K8 acetylation	1	1	1	1	0.164542	1	1	G4MXK8_MAGO7
biological_process	GO:0071930	negative regulation of transcription involved in G1/S transition of mitotic cell cycle	1	1	1	1	0.164542	1	1	G4NI33_MAGO7
molecular_function	GO:0042781	3'-tRNA processing endoribonuclease activity	1	1	1	1	0.162712	1	1	G4N5R7_MAGO7
biological_process	GO:0043001	Golgi to plasma membrane protein transport	1	6	0.166667	0.675777	0.716241	1	1	G4N9Y5_MAGO7
biological_process	GO:0045005	DNA-dependent DNA replication maintenance of fidelity	1	1	1	0.99976	0.00223894	1	0.565	G4N811_MAGO7
biological_process	GO:0034085	establishment of sister chromatid cohesion	1	1	1	0.965833	0.192062	1	1	G4N811_MAGO7
biological_process	GO:0036297	interstrand cross-link repair	1	3	0.333333	0.984439	0.128904	1	1	G4N811_MAGO7
molecular_function	GO:0102953	hypoglycin A gamma-glutamyl transpeptidase activity	1	3	0.333333	0.929241	0.413083	1	1	G4N1C2_MAGO7
molecular_function	GO:0103068	leukotriene C4 gamma-glutamyl transferase activity	1	3	0.333333	0.929241	0.413083	1	1	G4N1C2_MAGO7
cellular_component	GO:0017053	transcription repressor complex	1	1	1	0.974041	0.296464	1	1	G4MUR7_MAGO7
molecular_function	GO:0042826	histone deacetylase binding	1	1	1	1	0.162712	1	1	G4MUR7_MAGO7
molecular_function	GO:0036033	mediator complex binding	1	1	1	1	0.162712	1	1	G4MUR7_MAGO7
biological_process	GO:0000433	carbon catabolite repression of transcription from RNA polymerase II promoter by glucose	1	3	0.333333	0.927767	0.416959	1	1	G4MUR7_MAGO7
biological_process	GO:0006972	hyperosmotic response	1	2	0.5	0.927767	0.416959	1	1	G4MUR7_MAGO7
biological_process	GO:0001198	negative regulation of mating-type specific transcription from RNA polymerase II promoter	1	1	1	1	0.164542	1	1	G4MUR7_MAGO7
biological_process	GO:0016584	nucleosome positioning	1	3	0.333333	0.927767	0.416959	1	1	G4MUR7_MAGO7
biological_process	GO:1900192	positive regulation of single-species biofilm formation	1	1	1	1	0.164542	1	1	G4MUR7_MAGO7
biological_process	GO:0060256	regulation of flocculation	1	1	1	1	0.164542	1	1	G4MUR7_MAGO7
biological_process	GO:2000217	regulation of invasive growth in response to glucose limitation	1	2	0.5	0.927767	0.416959	1	1	G4MUR7_MAGO7
biological_process	GO:2001020	regulation of response to DNA damage stimulus	1	1	1	0.939907	0.258047	1	1	G4MUR7_MAGO7
molecular_function	GO:0000993	RNA polymerase II complex binding	1	2	0.5	0.873573	0.508635	1	1	G4N654_MAGO7
biological_process	GO:0006370	7-methylguanosine mRNA capping	1	3	0.333333	0.927767	0.416959	1	1	G4N4L3_MAGO7
biological_process	GO:0006303	double-strand break repair via nonhomologous end joining	1	4	0.25	0.807938	0.593206	1	1	G4N1A8_MAGO7
biological_process	GO:1905168	positive regulation of double-strand break repair via homologous recombination	1	2	0.5	0.972966	0.30205	1	1	G4NIS4_MAGO7
biological_process	GO:0006892	post-Golgi vesicle-mediated transport	1	2	0.5	0.776012	0.458907	1	1	G4N506_MAGO7
molecular_function	GO:0004563	beta-N-acetylhexosaminidase activity	1	3	0.333333	0.929241	0.413083	1	1	G4MR77_MAGO7
molecular_function	GO:0102148	N-acetyl-beta-D-galactosaminidase activity	1	3	0.333333	0.929241	0.413083	1	1	G4MR77_MAGO7
molecular_function	GO:0016597	amino acid binding	1	2	0.5	0.929241	0.413083	1	1	G4MTF2_MAGO7
cellular_component	GO:0019773	proteasome core complex, alpha-subunit complex	1	7	0.142857	0.685148	0.708138	1	1	G4NBY3_MAGO7
biological_process	GO:0032880	regulation of protein localization	1	4	0.25	0.952718	0.133491	1	1	G4MTA2_MAGO7
molecular_function	GO:0005094	Rho GDP-dissociation inhibitor activity	1	1	1	1	0.162712	1	1	G4MUU2_MAGO7
cellular_component	GO:0000938	GARP complex	1	3	0.333333	0.930473	0.409933	1	1	G4MYM4_MAGO7
biological_process	GO:0032956	regulation of actin cytoskeleton organization	1	5	0.2	0.937146	0.142349	1	1	G4NH97_MAGO7
biological_process	GO:0008360	regulation of cell shape	1	2	0.5	0.995754	0.0230643	1	0.999	G4NH97_MAGO7
cellular_component	GO:0000775	chromosome, centromeric region	1	10	0.1	0.583756	0.569298	1	1	G4MP09_MAGO7
cellular_component	GO:1990530	Cdc50p-Drs2p complex	1	1	1	1	0.161212	1	1	G4N506_MAGO7
molecular_function	GO:0140345	phosphatidylcholine flippase activity	1	1	1	1	0.162712	1	1	G4N506_MAGO7
molecular_function	GO:0090555	phosphatidylethanolamine flippase activity	1	1	1	1	0.162712	1	1	G4N506_MAGO7
molecular_function	GO:0140346	phosphatidylserine flippase activity	1	1	1	1	0.162712	1	1	G4N506_MAGO7
biological_process	GO:0032456	endocytic recycling	1	2	0.5	0.871096	0.512977	1	1	G4N506_MAGO7
biological_process	GO:0000749	response to pheromone triggering conjugation with cellular fusion	1	1	1	0.99176	0.0600933	1	1	G4N506_MAGO7
biological_process	GO:0006641	triglyceride metabolic process	1	3	0.333333	0.675777	0.716241	1	1	G4MR30_MAGO7
biological_process	GO:0009088	threonine biosynthetic process	1	4	0.25	0.871096	0.512977	1	1	G4N1B3_MAGO7
molecular_function	GO:0097157	pre-mRNA intronic binding	1	2	0.5	0.97355	0.298975	1	1	G4N5D4_MAGO7
molecular_function	GO:0035312	5'-3' exodeoxyribonuclease activity	1	1	1	0.984909	0.126427	1	1	G4NE19_MAGO7
molecular_function	GO:0018576	catechol 1,2-dioxygenase activity	1	3	0.333333	0.929241	0.413083	1	1	G5EHX9_MAGO7
biological_process	GO:0019439	aromatic compound catabolic process	1	3	0.333333	0.8811	0.180694	1	1	G5EHX9_MAGO7
biological_process	GO:0009712	catechol-containing compound metabolic process	1	3	0.333333	0.871096	0.512977	1	1	G5EHX9_MAGO7
molecular_function	GO:0004721	phosphoprotein phosphatase activity	1	4	0.25	0.652802	0.509835	1	1	G4MNF1_MAGO7
cellular_component	GO:0000214	tRNA-intron endonuclease complex	1	3	0.333333	0.930473	0.409933	1	1	G4MS27_MAGO7
molecular_function	GO:0140326	ATPase-coupled intramembrane lipid transporter activity	1	4	0.25	0.966821	0.188592	1	1	G4NGP6_MAGO7
biological_process	GO:0034605	cellular response to heat	1	4	0.25	0.741953	0.660238	1	1	G4N8C1_MAGO7
biological_process	GO:0006072	glycerol-3-phosphate metabolic process	1	4	0.25	0.675777	0.716241	1	1	G4MY61_MAGO7
cellular_component	GO:0005819	spindle	1	7	0.142857	0.263792	0.883821	1	1	G4MW88_MAGO7
molecular_function	GO:0019888	protein phosphatase regulator activity	1	5	0.2	0.831071	0.444133	1	1	G4MSF0_MAGO7
molecular_function	GO:0009982	pseudouridine synthase activity	1	7	0.142857	0.680925	0.711736	1	1	G4N6Z8_MAGO7
biological_process	GO:0043968	histone H2A acetylation	1	1	1	1	0.164542	1	1	G4MYA8_MAGO7
biological_process	GO:0043967	histone H4 acetylation	1	1	1	1	0.0270343	1	1	G4MYA8_MAGO7
cellular_component	GO:0000502	proteasome complex	1	3	0.333333	0.669533	0.505205	1	1	G4NGD9_MAGO7
molecular_function	GO:0070577	lysine-acetylated histone binding	1	2	0.5	0.97355	0.298975	1	1	G4NGD9_MAGO7
molecular_function	GO:0016504	peptidase activator activity	1	1	1	0.873573	0.508635	1	1	G4NGD9_MAGO7
molecular_function	GO:0004848	ureidoglycolate hydrolase activity	1	1	1	1	0.162712	1	1	G4MYC2_MAGO7
molecular_function	GO:0050385	ureidoglycolate lyase activity	1	1	1	1	0.162712	1	1	G4MYC2_MAGO7
biological_process	GO:0006144	purine nucleobase metabolic process	1	4	0.25	0.302688	0.919706	1	1	G4MYC2_MAGO7
cellular_component	GO:0000127	transcription factor TFIIIC complex	1	2	0.5	0.974041	0.296464	1	1	G4MRV6_MAGO7
molecular_function	GO:0102193	protein-ribulosamine 3-kinase activity	1	4	0.25	0.873573	0.508635	1	1	G4MW30_MAGO7
biological_process	GO:0071897	DNA biosynthetic process	1	4	0.25	0.964643	0.108135	1	1	G4NCG5_MAGO7
cellular_component	GO:0035339	SPOTS complex	1	2	0.5	0.974041	0.296464	1	1	G4N522_MAGO7
molecular_function	GO:0004758	serine C-palmitoyltransferase activity	1	1	1	1	0.162712	1	1	G4N522_MAGO7
molecular_function	GO:0016300	tRNA (uracil) methyltransferase activity	1	1	1	0.929241	0.413083	1	1	G4N648_MAGO7
cellular_component	GO:0097268	cytoophidium	1	1	1	1	0.161212	1	1	G4N236_MAGO7
molecular_function	GO:0003883	CTP synthase activity	1	1	1	1	0.162712	1	1	G4N236_MAGO7
biological_process	GO:0044210	'de novo' CTP biosynthetic process	1	1	1	1	0.164542	1	1	G4N236_MAGO7
molecular_function	GO:0030943	mitochondrion targeting sequence binding	1	2	0.5	0.97355	0.298975	1	1	G4MVJ5_MAGO7
molecular_function	GO:0008320	protein transmembrane transporter activity	1	5	0.2	0.909838	0.319075	1	1	G4MVJ5_MAGO7
molecular_function	GO:0003899	DNA-directed 5'-3' RNA polymerase activity	1	13	0.0769231	0.126712	0.961882	1	1	G4NBX7_MAGO7
molecular_function	GO:0008194	UDP-glycosyltransferase activity	1	10	0.1	0.256857	0.887749	1	1	G4N4J7_MAGO7
molecular_function	GO:0061608	nuclear import signal receptor activity	1	2	0.5	0.97355	0.298975	1	1	G4MZS0_MAGO7
biological_process	GO:0046822	regulation of nucleocytoplasmic transport	1	2	0.5	0.939907	0.258047	1	1	G4MTA2_MAGO7
cellular_component	GO:0031166	integral component of vacuolar membrane	1	1	1	1	0.0259594	1	0.997	G4N1V7_MAGO7
cellular_component	GO:1990816	vacuole-mitochondrion membrane contact site	1	1	1	1	0.161212	1	1	G4N1V7_MAGO7
molecular_function	GO:0061459	L-arginine transmembrane transporter activity	1	1	1	1	0.162712	1	1	G4N1V7_MAGO7
molecular_function	GO:0015379	potassium:chloride symporter activity	1	1	1	1	0.162712	1	1	G4N1V7_MAGO7
biological_process	GO:0097638	L-arginine import across plasma membrane	1	1	1	1	0.164542	1	1	G4N1V7_MAGO7
biological_process	GO:1903401	L-lysine transmembrane transport	1	1	1	1	0.164542	1	1	G4N1V7_MAGO7
biological_process	GO:0055075	potassium ion homeostasis	1	1	1	0.807938	0.593206	1	1	G4N1V7_MAGO7
biological_process	GO:0034486	vacuolar transmembrane transport	1	1	1	0.995565	0.0722326	1	1	G4N1V7_MAGO7
molecular_function	GO:0030729	acetoacetate-CoA ligase activity	1	2	0.5	0.97355	0.298975	1	1	G4N1E1_MAGO7
cellular_component	GO:0110085	mitotic actomyosin contractile ring	1	3	0.333333	0.749934	0.651954	1	1	G4MP09_MAGO7
biological_process	GO:1904530	negative regulation of actin filament binding	1	2	0.5	0.972966	0.30205	1	1	G4N5J5_MAGO7
biological_process	GO:0030837	negative regulation of actin filament polymerization	1	3	0.333333	0.939907	0.258047	1	1	G4N5J5_MAGO7
cellular_component	GO:0005847	mRNA cleavage and polyadenylation specificity factor complex	1	6	0.166667	0.749934	0.651954	1	1	G4N6C6_MAGO7
biological_process	GO:0034728	nucleosome organization	1	2	0.5	0.989435	0.0325827	1	1	G4MU89_MAGO7
cellular_component	GO:0033553	rDNA heterochromatin	1	3	0.333333	0.930473	0.409933	1	1	G4N540_MAGO7
cellular_component	GO:0070824	SHREC complex	1	2	0.5	0.974041	0.296464	1	1	G4MVC1_MAGO7
biological_process	GO:0030466	silent mating-type cassette heterochromatin assembly	1	7	0.142857	0.675777	0.716241	1	1	G4MVC9_MAGO7
molecular_function	GO:0008094	ATP-dependent activity, acting on DNA	1	3	0.333333	0.999998	7.51697e-06	1	0	G4MNW7_MAGO7
molecular_function	GO:0003690	double-stranded DNA binding	1	6	0.166667	0.910258	0.172004	1	1	G4MW52_MAGO7
molecular_function	GO:0004430	1-phosphatidylinositol 4-kinase activity	1	3	0.333333	0.929241	0.413083	1	1	G4MT77_MAGO7
biological_process	GO:0048015	phosphatidylinositol-mediated signaling	1	4	0.25	0.871096	0.512977	1	1	G4NKI8_MAGO7
cellular_component	GO:0072546	EMC complex	1	3	0.333333	0.930473	0.409933	1	1	G4N1A1_MAGO7
cellular_component	GO:0030008	TRAPP complex	1	5	0.2	0.9119	0.314852	1	1	G4NGQ6_MAGO7
biological_process	GO:0032008	positive regulation of TOR signaling	1	2	0.5	0.965833	0.192062	1	1	G4NFB8_MAGO7
biological_process	GO:0019236	response to pheromone	1	1	1	0.9957	0.0291842	1	1	G4N845_MAGO7
molecular_function	GO:0016971	flavin-linked sulfhydryl oxidase activity	1	2	0.5	0.97355	0.298975	1	1	G4N0Y7_MAGO7
biological_process	GO:0030041	actin filament polymerization	1	3	0.333333	0.980977	0.061412	1	1	G4NLA2_MAGO7
molecular_function	GO:0004113	2',3'-cyclic-nucleotide 3'-phosphodiesterase activity	1	1	1	1	0.162712	1	1	G4N4T4_MAGO7
molecular_function	GO:0051730	GTP-dependent polyribonucleotide 5'-hydroxyl-kinase activity	1	1	1	1	0.162712	1	1	G4N4T4_MAGO7
biological_process	GO:0036498	IRE1-mediated unfolded protein response	1	2	0.5	0.972966	0.30205	1	1	G4N4T4_MAGO7
biological_process	GO:0032056	positive regulation of translation in response to stress	1	1	1	0.995565	0.0722326	1	1	G4N4T4_MAGO7
biological_process	GO:2000622	regulation of nuclear-transcribed mRNA catabolic process, nonsense-mediated decay	1	1	1	1	0.164542	1	1	G4N4T4_MAGO7
biological_process	GO:0051604	protein maturation	1	2	0.5	0.769472	0.379598	1	1	G4NH61_MAGO7
cellular_component	GO:0043596	nuclear replication fork	1	3	0.333333	0.943496	0.151378	1	1	G4MQP3_MAGO7
molecular_function	GO:0004722	protein serine/threonine phosphatase activity	1	5	0.2	0.160206	0.965966	1	1	G4MP09_MAGO7
biological_process	GO:0070262	peptidyl-serine dephosphorylation	1	5	0.2	0.807938	0.593206	1	1	G4N8C1_MAGO7
cellular_component	GO:0071021	U2-type post-spliceosomal complex	1	1	1	1	0.161212	1	1	G4NFJ0_MAGO7
cellular_component	GO:0000814	ESCRT II complex	1	3	0.333333	0.930473	0.409933	1	1	G4NCT4_MAGO7
molecular_function	GO:0008139	nuclear localization sequence binding	1	2	0.5	0.97355	0.298975	1	1	G4NIB9_MAGO7
molecular_function	GO:0005519	cytoskeletal regulatory protein binding	1	1	1	1	0.162712	1	1	G4MPB7_MAGO7
biological_process	GO:0051125	regulation of actin nucleation	1	1	1	0.970816	0.13066	1	1	G4MPB7_MAGO7
biological_process	GO:0008612	peptidyl-lysine modification to peptidyl-hypusine	1	2	0.5	0.972966	0.30205	1	1	G4MPB8_MAGO7
cellular_component	GO:0000221	vacuolar proton-transporting V-type ATPase, V1 domain	1	5	0.2	0.814282	0.584973	1	1	G5EHV3_MAGO7
biological_process	GO:1902531	regulation of intracellular signal transduction	1	2	0.5	0.999956	0.000188537	1	0.074	G4MU11_MAGO7
biological_process	GO:0006515	protein quality control for misfolded or incompletely synthesized proteins	1	5	0.2	0.437932	0.862024	1	1	G4NH61_MAGO7
biological_process	GO:0006261	DNA-dependent DNA replication	1	5	0.2	0.964469	0.0732565	1	1	G4MU89_MAGO7
biological_process	GO:0046907	intracellular transport	1	6	0.166667	0.956336	0.061924	1	1	G4MVE2_MAGO7
biological_process	GO:0007031	peroxisome organization	1	6	0.166667	0.657346	0.588428	1	1	G5EHN9_MAGO7
biological_process	GO:0006913	nucleocytoplasmic transport	1	3	0.333333	0.895504	0.176194	1	1	G4MYK3_MAGO7
biological_process	GO:0018298	protein-chromophore linkage	1	3	0.333333	0.927767	0.416959	1	1	G4MU11_MAGO7
cellular_component	GO:0035101	FACT complex	1	2	0.5	0.974041	0.296464	1	1	G4MU89_MAGO7
molecular_function	GO:0031491	nucleosome binding	1	3	0.333333	0.811408	0.588646	1	1	G4MU89_MAGO7
biological_process	GO:0034724	DNA replication-independent chromatin organization	1	1	1	0.999273	0.0155611	1	0.999	G4MU89_MAGO7
biological_process	GO:0045490	pectin catabolic process	1	2	0.5	0.972966	0.30205	1	1	G4NB63_MAGO7
biological_process	GO:0034765	regulation of ion transmembrane transport	1	3	0.333333	0.741953	0.660238	1	1	G4MNL6_MAGO7
cellular_component	GO:0030864	cortical actin cytoskeleton	1	2	0.5	0.868493	0.261259	1	1	G4MRZ0_MAGO7
cellular_component	GO:0061672	glutathione hydrolase complex	1	1	1	1	0.161212	1	1	G4MQ98_MAGO7
molecular_function	GO:0051536	iron-sulfur cluster binding	1	7	0.142857	0.350276	0.781897	1	1	G4MSX0_MAGO7
molecular_function	GO:0004775	succinate-CoA ligase (ADP-forming) activity	1	2	0.5	0.97355	0.298975	1	1	G4MNV7_MAGO7
biological_process	GO:0006104	succinyl-CoA metabolic process	1	1	1	1	0.164542	1	1	G4MNV7_MAGO7
molecular_function	GO:1990380	Lys48-specific deubiquitinase activity	1	1	1	1	0.162712	1	1	G4NH91_MAGO7
biological_process	GO:0042759	long-chain fatty acid biosynthetic process	1	2	0.5	0.972966	0.30205	1	1	G4N2L8_MAGO7
biological_process	GO:0097502	mannosylation	1	4	0.25	0.871096	0.512977	1	1	G4N0J7_MAGO7
cellular_component	GO:0035841	new growing cell tip	1	2	0.5	0.974041	0.296464	1	1	G4MY59_MAGO7
biological_process	GO:0030950	establishment or maintenance of actin cytoskeleton polarity	1	5	0.2	0.807938	0.593206	1	1	G4MY59_MAGO7
molecular_function	GO:0015297	antiporter activity	1	4	0.25	0.595609	0.690721	1	1	G4N5Y3_MAGO7
biological_process	GO:0006085	acetyl-CoA biosynthetic process	1	2	0.5	0.611256	0.763026	1	1	G4N2L8_MAGO7
biological_process	GO:0043488	regulation of mRNA stability	1	2	0.5	0.94355	0.139777	1	1	G4N7X5_MAGO7
molecular_function	GO:0052689	carboxylic ester hydrolase activity	1	5	0.2	0.953747	0.0887783	1	1	G4NHR4_MAGO7
cellular_component	GO:0030427	site of polarized growth	1	2	0.5	0.981998	0.0446122	1	1	G4NFW8_MAGO7
cellular_component	GO:0005871	kinesin complex	1	2	0.5	0.974041	0.296464	1	1	G5EHR0_MAGO7
biological_process	GO:0006688	glycosphingolipid biosynthetic process	1	1	1	1	0.164542	1	1	G4MQE4_MAGO7
biological_process	GO:0006675	mannosyl-inositol phosphorylceramide metabolic process	1	1	1	1	0.164542	1	1	G4MQE4_MAGO7
cellular_component	GO:0030906	retromer, cargo-selective complex	1	2	0.5	0.974041	0.296464	1	1	G4N4D6_MAGO7
molecular_function	GO:0140312	cargo adaptor activity	1	1	1	0.873573	0.508635	1	1	G4N4D6_MAGO7
biological_process	GO:1900102	negative regulation of endoplasmic reticulum unfolded protein response	1	1	1	1	0.164542	1	1	G4N4D6_MAGO7
biological_process	GO:1904377	positive regulation of protein localization to cell periphery	1	1	1	0.972966	0.30205	1	1	G4N4D6_MAGO7
biological_process	GO:0016043	cellular component organization	1	4	0.25	0.968799	0.0403774	1	1	G4NHA5_MAGO7
biological_process	GO:0005991	trehalose metabolic process	1	1	1	0.907393	0.324223	1	1	G4MY35_MAGO7
molecular_function	GO:0047710	bis(5'-adenosyl)-triphosphatase activity	1	1	1	1	0.162712	1	1	G4MT24_MAGO7
biological_process	GO:0043087	regulation of GTPase activity	1	5	0.2	0.992675	0.0343066	1	1	G4NHG8_MAGO7
molecular_function	GO:0003785	actin monomer binding	1	1	1	1	0.162712	1	1	G4N5J5_MAGO7
biological_process	GO:1904670	actin filament polymerization involved in mitotic actomyosin contractile ring assembly	1	1	1	1	0.164542	1	1	G4N5J5_MAGO7
biological_process	GO:2000812	regulation of barbed-end actin filament capping	1	1	1	0.972966	0.30205	1	1	G4N5J5_MAGO7
biological_process	GO:0000209	protein polyubiquitination	1	4	0.25	0.741953	0.660238	1	1	G4N1R7_MAGO7
molecular_function	GO:0004439	phosphatidylinositol-4,5-bisphosphate 5-phosphatase activity	1	1	1	1	0.162712	1	1	G4MS64_MAGO7
biological_process	GO:0071931	positive regulation of transcription involved in G1/S transition of mitotic cell cycle	1	3	0.333333	0.927767	0.416959	1	1	G4N5B7_MAGO7
molecular_function	GO:0003954	NADH dehydrogenase activity	1	3	0.333333	0.498254	0.830942	1	1	G4N8E7_MAGO7
biological_process	GO:0006116	NADH oxidation	1	4	0.25	0.871096	0.512977	1	1	G4N8E7_MAGO7
cellular_component	GO:0019005	SCF ubiquitin ligase complex	1	3	0.333333	0.814282	0.584973	1	1	G4N723_MAGO7
biological_process	GO:0031146	SCF-dependent proteasomal ubiquitin-dependent protein catabolic process	1	5	0.2	0.807938	0.593206	1	1	G4N723_MAGO7
biological_process	GO:0022900	electron transport chain	1	3	0.333333	0.101421	0.981094	1	1	G4NE44_MAGO7
molecular_function	GO:0004016	adenylate cyclase activity	1	1	1	1	0.162712	1	1	G4MR48_MAGO7
biological_process	GO:0006171	cAMP biosynthetic process	1	1	1	1	0.164542	1	1	G4MR48_MAGO7
biological_process	GO:0006471	protein ADP-ribosylation	1	1	1	1	0.164542	1	1	G4ML01_MAGO7
cellular_component	GO:0022626	cytosolic ribosome	1	2	0.5	0.0820135	0.985461	0.996	1	G4MR95_MAGO7
molecular_function	GO:0043008	ATP-dependent protein binding	1	1	1	1	0.162712	1	1	G4MR95_MAGO7
biological_process	GO:0072755	cellular response to benomyl	1	1	1	1	0.164542	1	1	G4MR95_MAGO7
biological_process	GO:0070301	cellular response to hydrogen peroxide	1	2	0.5	0.927767	0.416959	1	1	G4MR95_MAGO7
biological_process	GO:1990451	cellular stress response to acidic pH	1	1	1	1	0.164542	1	1	G4MR95_MAGO7
biological_process	GO:1904262	negative regulation of TORC1 signaling	1	2	0.5	0.972966	0.30205	1	1	G4MR95_MAGO7
biological_process	GO:0071264	positive regulation of translational initiation in response to starvation	1	2	0.5	0.972966	0.30205	1	1	G4MR95_MAGO7
biological_process	GO:0006448	regulation of translational elongation	1	2	0.5	0.685062	0.611494	1	1	G4MR95_MAGO7
biological_process	GO:0072344	rescue of stalled ribosome	1	2	0.5	0.972966	0.30205	1	1	G4MMC9_MAGO7
cellular_component	GO:0005811	lipid droplet	1	6	0.166667	0.749934	0.651954	1	1	G4NED0_MAGO7
cellular_component	GO:0033588	elongator holoenzyme complex	1	6	0.166667	0.749934	0.651954	1	1	G4MTL1_MAGO7
cellular_component	GO:0030136	clathrin-coated vesicle	1	2	0.5	0.744233	0.549933	1	1	G4N7C0_MAGO7
cellular_component	GO:0035839	non-growing cell tip	1	2	0.5	0.930473	0.409933	1	1	G4MY59_MAGO7
molecular_function	GO:0008569	minus-end-directed microtubule motor activity	1	1	1	1	0.162712	1	1	G4MSJ0_MAGO7
biological_process	GO:0000902	cell morphogenesis	1	4	0.25	0.980977	0.061412	1	1	G4MUV9_MAGO7
molecular_function	GO:0045547	dehydrodolichyl diphosphate synthase activity	1	2	0.5	0.97355	0.298975	1	1	G4NH37_MAGO7
biological_process	GO:0019408	dolichol biosynthetic process	1	2	0.5	0.927767	0.416959	1	1	G4NH37_MAGO7
biological_process	GO:0032958	inositol phosphate biosynthetic process	1	3	0.333333	0.927767	0.416959	1	1	G4MR28_MAGO7
molecular_function	GO:0000285	1-phosphatidylinositol-3-phosphate 5-kinase activity	1	1	1	1	0.162712	1	1	G4MV74_MAGO7
molecular_function	GO:0042910	xenobiotic transmembrane transporter activity	1	3	0.333333	0.929241	0.413083	1	1	G4N5Y3_MAGO7
biological_process	GO:1990961	xenobiotic detoxification by transmembrane export across the plasma membrane	1	3	0.333333	0.927767	0.416959	1	1	G4N5Y3_MAGO7
biological_process	GO:0090173	regulation of synaptonemal complex assembly	1	1	1	1	0.164542	1	1	G4N9J8_MAGO7
biological_process	GO:0031573	mitotic intra-S DNA damage checkpoint signaling	1	4	0.25	0.871096	0.512977	1	1	G4N1A8_MAGO7
biological_process	GO:0001100	negative regulation of exit from mitosis	1	3	0.333333	0.927767	0.416959	1	1	G4NAR8_MAGO7
biological_process	GO:0007089	traversing start control point of mitotic cell cycle	1	3	0.333333	0.927767	0.416959	1	1	G4MTA2_MAGO7
molecular_function	GO:1904931	MCM complex binding	1	2	0.5	0.97355	0.298975	1	1	G4MVC9_MAGO7
biological_process	GO:0006267	pre-replicative complex assembly involved in nuclear cell cycle DNA replication	1	5	0.2	0.807938	0.593206	1	1	G4MVC9_MAGO7
biological_process	GO:0030174	regulation of DNA-dependent DNA replication initiation	1	5	0.2	0.807938	0.593206	1	1	G4MVC9_MAGO7
biological_process	GO:0051052	regulation of DNA metabolic process	1	1	1	0.97404	0.0777743	1	1	G4N685_MAGO7
cellular_component	GO:0031261	DNA replication preinitiation complex	1	2	0.5	0.790462	0.496448	1	1	G4MQP3_MAGO7
biological_process	GO:1990918	double-strand break repair involved in meiotic recombination	1	2	0.5	0.972966	0.30205	1	1	G4N1A8_MAGO7
biological_process	GO:0043504	mitochondrial DNA repair	1	2	0.5	0.972966	0.30205	1	1	G4N540_MAGO7
biological_process	GO:0051097	negative regulation of helicase activity	1	2	0.5	0.927767	0.416959	1	1	G4MVC9_MAGO7
molecular_function	GO:0008195	phosphatidate phosphatase activity	1	1	1	1	0.162712	1	1	G4MYK3_MAGO7
biological_process	GO:0007029	endoplasmic reticulum organization	1	1	1	0.685062	0.611494	1	1	G4MYK3_MAGO7
biological_process	GO:0006997	nucleus organization	1	1	1	0.965693	0.120328	1	1	G4MYK3_MAGO7
biological_process	GO:0006044	N-acetylglucosamine metabolic process	1	2	0.5	0.972966	0.30205	1	1	G4NB58_MAGO7
molecular_function	GO:0004408	holocytochrome-c synthase activity	1	2	0.5	0.97355	0.298975	1	1	G4NA39_MAGO7
biological_process	GO:0051016	barbed-end actin filament capping	1	3	0.333333	0.984439	0.128904	1	1	G4N6W5_MAGO7
molecular_function	GO:0004455	ketol-acid reductoisomerase activity	1	1	1	1	0.162712	1	1	G4MW52_MAGO7
molecular_function	GO:0047419	N-acetylgalactosamine-6-phosphate deacetylase activity	1	1	1	1	0.162712	1	1	G4NB58_MAGO7
molecular_function	GO:0008448	N-acetylglucosamine-6-phosphate deacetylase activity	1	1	1	1	0.162712	1	1	G4NB58_MAGO7
molecular_function	GO:0009881	photoreceptor activity	1	1	1	1	0.162712	1	1	G4MU11_MAGO7
biological_process	GO:0009584	detection of visible light	1	1	1	1	0.164542	1	1	G4MU11_MAGO7
molecular_function	GO:0015299	solute:proton antiporter activity	1	5	0.2	0.555867	0.798022	1	1	G4MXT7_MAGO7
biological_process	GO:0000917	division septum assembly	1	1	1	0.907393	0.324223	1	1	G4NH97_MAGO7
biological_process	GO:0032955	regulation of division septum assembly	1	1	1	0.907393	0.324223	1	1	G4NH97_MAGO7
molecular_function	GO:0030695	GTPase regulator activity	1	2	0.5	1	4.02714e-10	1	0	G4N0E4_MAGO7
biological_process	GO:0005992	trehalose biosynthetic process	1	4	0.25	0.871096	0.512977	1	1	G4N8C1_MAGO7
biological_process	GO:0071470	cellular response to osmotic stress	1	3	0.333333	0.99176	0.0600933	1	1	G4N4E8_MAGO7
biological_process	GO:0032007	negative regulation of TOR signaling	1	1	1	0.999273	0.0155611	1	0.999	G4MPF6_MAGO7
molecular_function	GO:0004559	alpha-mannosidase activity	1	2	0.5	0.209773	0.951391	1	1	G4MKK2_MAGO7
cellular_component	GO:0005786	signal recognition particle, endoplasmic reticulum targeting	1	5	0.2	0.814282	0.584973	1	1	G4MN04_MAGO7
molecular_function	GO:0008312	7S RNA binding	1	5	0.2	0.811408	0.588646	1	1	G4MN04_MAGO7
biological_process	GO:0006614	SRP-dependent cotranslational protein targeting to membrane	1	8	0.125	0.491711	0.834755	1	1	G4MN04_MAGO7
cellular_component	GO:0005667	transcription regulator complex	1	2	0.5	0.87066	0.237126	1	1	G4N3K7_MAGO7
molecular_function	GO:0016462	pyrophosphatase activity	1	2	0.5	0.216424	0.852475	1	1	G4NDG8_MAGO7
molecular_function	GO:0004413	homoserine kinase activity	1	1	1	1	0.162712	1	1	G4N1B3_MAGO7
cellular_component	GO:0042764	ascospore-type prospore	1	1	1	0.998302	0.0155882	1	0.885	G4MTA2_MAGO7
cellular_component	GO:1990860	Pho85-Pho80 CDK-cyclin complex	1	1	1	1	0.161212	1	1	G4MTA2_MAGO7
biological_process	GO:0050849	negative regulation of calcium-mediated signaling	1	1	1	1	0.164542	1	1	G4MTA2_MAGO7
biological_process	GO:0043433	negative regulation of DNA-binding transcription factor activity	1	2	0.5	0.972966	0.30205	1	1	G4MTA2_MAGO7
biological_process	GO:0045719	negative regulation of glycogen biosynthetic process	1	1	1	1	0.164542	1	1	G4MTA2_MAGO7
biological_process	GO:0016242	negative regulation of macroautophagy	1	1	1	1	0.164542	1	1	G4MTA2_MAGO7
biological_process	GO:0045936	negative regulation of phosphate metabolic process	1	1	1	0.995565	0.0722326	1	1	G4MTA2_MAGO7
biological_process	GO:0071073	positive regulation of phospholipid biosynthetic process	1	1	1	1	0.164542	1	1	G4MTA2_MAGO7
biological_process	GO:0051302	regulation of cell division	1	1	1	0.781341	0.508289	1	1	G4MTA2_MAGO7
biological_process	GO:0032878	regulation of establishment or maintenance of cell polarity	1	1	1	0.999273	0.0155611	1	0.999	G4MTA2_MAGO7
biological_process	GO:0031647	regulation of protein stability	1	1	1	0.807938	0.593206	1	1	G4MTA2_MAGO7
cellular_component	GO:0009317	acetyl-CoA carboxylase complex	1	1	1	1	0.161212	1	1	G4N2L8_MAGO7
molecular_function	GO:1905502	acetyl-CoA binding	1	1	1	1	0.162712	1	1	G4N2L8_MAGO7
molecular_function	GO:0003989	acetyl-CoA carboxylase activity	1	1	1	1	0.162712	1	1	G4N2L8_MAGO7
molecular_function	GO:0004075	biotin carboxylase activity	1	1	1	1	0.162712	1	1	G4N2L8_MAGO7
molecular_function	GO:0016743	carboxyl- or carbamoyltransferase activity	1	1	1	0.995705	0.0707588	1	1	G4N2L8_MAGO7
biological_process	GO:2001295	malonyl-CoA biosynthetic process	1	1	1	1	0.164542	1	1	G4N2L8_MAGO7
biological_process	GO:0101026	mitotic nuclear membrane biogenesis	1	1	1	1	0.164542	1	1	G4N2L8_MAGO7
cellular_component	GO:0035658	Mon1-Ccz1 complex	1	1	1	1	0.161212	1	1	G4MYP3_MAGO7
biological_process	GO:0000245	spliceosomal complex assembly	1	3	0.333333	0.86934	0.388744	1	1	G4MZ61_MAGO7
molecular_function	GO:0033678	5'-3' DNA/RNA helicase activity	1	1	1	1	0.162712	1	1	G4N540_MAGO7
molecular_function	GO:0061995	ATP-dependent protein-DNA complex displacement activity	1	1	1	1	0.162712	1	1	G4N540_MAGO7
molecular_function	GO:1990814	DNA/DNA annealing activity	1	1	1	1	0.162712	1	1	G4N540_MAGO7
molecular_function	GO:0070336	flap-structured DNA binding	1	1	1	1	0.162712	1	1	G4N540_MAGO7
biological_process	GO:0044806	G-quadruplex DNA unwinding	1	1	1	1	0.164542	1	1	G4N540_MAGO7
biological_process	GO:1905467	positive regulation of G-quadruplex DNA unwinding	1	1	1	1	0.164542	1	1	G4N540_MAGO7
biological_process	GO:0120292	positive regulation of mitotic recombination-dependent replication fork processing	1	1	1	1	0.164542	1	1	G4N540_MAGO7
biological_process	GO:1903469	removal of RNA primer involved in mitotic DNA replication	1	1	1	1	0.164542	1	1	G4N540_MAGO7
molecular_function	GO:0004839	ubiquitin activating enzyme activity	1	1	1	1	0.162712	1	1	G4MZI8_MAGO7
molecular_function	GO:0140613	P-type manganese transporter activity	1	1	1	1	0.162712	1	1	G4MR41_MAGO7
biological_process	GO:0061454	release of sequestered calcium ion into cytosol by Golgi	1	1	1	1	0.164542	1	1	G4MR41_MAGO7
cellular_component	GO:0000159	protein phosphatase type 2A complex	1	5	0.2	0.814282	0.584973	1	1	G4MP09_MAGO7
molecular_function	GO:0004816	asparagine-tRNA ligase activity	1	1	1	1	0.162712	1	1	G4MVL0_MAGO7
biological_process	GO:0006421	asparaginyl-tRNA aminoacylation	1	1	1	1	0.164542	1	1	G4MVL0_MAGO7
biological_process	GO:0006221	pyrimidine nucleotide biosynthetic process	1	2	0.5	0.982256	0.0654468	1	1	G4MS82_MAGO7
cellular_component	GO:0090726	cortical dynamic polarity patch	1	2	0.5	0.974041	0.296464	1	1	G4MUV9_MAGO7
biological_process	GO:1902917	positive regulation of mating projection assembly	1	1	1	1	0.164542	1	1	G4MUV9_MAGO7
biological_process	GO:2000769	regulation of establishment or maintenance of cell polarity regulating cell shape	1	1	1	0.972966	0.30205	1	1	G4MUV9_MAGO7
biological_process	GO:1901901	regulation of protein localization to cell division site involved in cytokinesis	1	1	1	1	0.164542	1	1	G4MUV9_MAGO7
cellular_component	GO:0031533	mRNA cap methyltransferase complex	1	2	0.5	0.974041	0.296464	1	1	G4N4L3_MAGO7
molecular_function	GO:0030620	U2 snRNA binding	1	2	0.5	0.97355	0.298975	1	1	G4N5D4_MAGO7
molecular_function	GO:0030623	U5 snRNA binding	1	1	1	1	0.162712	1	1	G4N5D4_MAGO7
biological_process	GO:0000389	mRNA 3'-splice site recognition	1	1	1	1	0.164542	1	1	G4N5D4_MAGO7
biological_process	GO:0000395	mRNA 5'-splice site recognition	1	2	0.5	0.972966	0.30205	1	1	G4N5D4_MAGO7
cellular_component	GO:0005951	carbamoyl-phosphate synthase complex	1	1	1	1	0.161212	1	1	G4MS82_MAGO7
biological_process	GO:0045898	regulation of RNA polymerase II transcription preinitiation complex assembly	1	1	1	0.826925	0.450363	1	1	G4N3K7_MAGO7
molecular_function	GO:0042162	telomeric DNA binding	1	3	0.333333	0.911257	0.260532	1	1	G4NHA0_MAGO7
cellular_component	GO:0035145	exon-exon junction complex	1	2	0.5	0.974041	0.296464	1	1	G4ND41_MAGO7
molecular_function	GO:0004520	endodeoxyribonuclease activity	1	2	0.5	0.986115	0.064509	1	1	G4N1A8_MAGO7
biological_process	GO:0010791	DNA double-strand break processing involved in repair via synthesis-dependent strand annealing	1	1	1	1	0.164542	1	1	G4N1A8_MAGO7
biological_process	GO:0035753	maintenance of DNA trinucleotide repeats	1	2	0.5	0.972966	0.30205	1	1	G4N1A8_MAGO7
biological_process	GO:1990898	meiotic DNA double-strand break clipping	1	1	1	1	0.164542	1	1	G4N1A8_MAGO7
biological_process	GO:0010780	meiotic DNA double-strand break formation involved in reciprocal meiotic recombination	1	1	1	0.972966	0.30205	1	1	G4N1A8_MAGO7
biological_process	GO:0097552	mitochondrial double-strand break repair via homologous recombination	1	1	1	1	0.164542	1	1	G4N1A8_MAGO7
biological_process	GO:0051037	regulation of transcription involved in meiotic cell cycle	1	1	1	1	0.164542	1	1	G4N1A8_MAGO7
biological_process	GO:0007009	plasma membrane organization	1	2	0.5	0.826925	0.450363	1	1	G4MY59_MAGO7
biological_process	GO:0009272	fungal-type cell wall biogenesis	1	2	0.5	0.611256	0.763026	1	1	G4NFW8_MAGO7
cellular_component	GO:0031931	TORC1 complex	1	3	0.333333	0.930473	0.409933	1	1	G4NLR2_MAGO7
biological_process	GO:0001558	regulation of cell growth	1	2	0.5	0.996843	0.0341667	1	1	G4NLR2_MAGO7
molecular_function	GO:0004070	aspartate carbamoyltransferase activity	1	1	1	1	0.162712	1	1	G4MTF2_MAGO7
biological_process	GO:1903459	mitotic DNA replication lagging strand elongation	1	2	0.5	0.972966	0.30205	1	1	G4MXT0_MAGO7
cellular_component	GO:0017087	mitochondrial processing peptidase complex	1	2	0.5	0.974041	0.296464	1	1	G4N7C7_MAGO7
biological_process	GO:0031123	RNA 3'-end processing	1	1	1	0.247995	0.892897	1	1	G4N5I8_MAGO7
biological_process	GO:0043631	RNA polyadenylation	1	1	1	0.970816	0.13066	1	1	G4N5I8_MAGO7
molecular_function	GO:0015093	ferrous iron transmembrane transporter activity	1	1	1	0.97355	0.298975	1	1	G4ND26_MAGO7
molecular_function	GO:0005384	manganese ion transmembrane transporter activity	1	1	1	1	0.0264499	1	1	G4ND26_MAGO7
cellular_component	GO:1990334	Bfa1-Bub2 complex	1	1	1	1	0.161212	1	1	G4NAR8_MAGO7
biological_process	GO:0045004	DNA replication proofreading	1	1	1	1	0.164542	1	1	G4MXT0_MAGO7
biological_process	GO:1904161	DNA synthesis involved in UV-damage excision repair	1	1	1	1	0.164542	1	1	G4MXT0_MAGO7
biological_process	GO:0006278	RNA-dependent DNA biosynthetic process	1	1	1	0.927767	0.416959	1	1	G4MXT0_MAGO7
cellular_component	GO:0005946	alpha,alpha-trehalose-phosphate synthase complex (UDP-forming)	1	2	0.5	0.974041	0.296464	1	1	G4N8C1_MAGO7
biological_process	GO:0070413	trehalose metabolism in response to stress	1	2	0.5	0.972966	0.30205	1	1	G4N8C1_MAGO7
cellular_component	GO:0008622	epsilon DNA polymerase complex	1	2	0.5	0.974041	0.296464	1	1	G4NHG4_MAGO7
cellular_component	GO:0008290	F-actin capping protein complex	1	2	0.5	0.974041	0.296464	1	1	G4N6W5_MAGO7
biological_process	GO:0032120	ascospore-type prospore membrane formation	1	1	1	1	0.164542	1	1	G4MZL7_MAGO7
biological_process	GO:0006090	pyruvate metabolic process	1	3	0.333333	0.117015	0.977344	1	1	G4N0N1_MAGO7
biological_process	GO:0010619	adenylate cyclase-activating glucose-activated G protein-coupled receptor signaling pathway	1	2	0.5	0.972966	0.30205	1	1	G4N7T3_MAGO7
biological_process	GO:0120029	proton export across plasma membrane	1	2	0.5	0.972966	0.30205	1	1	G4MU02_MAGO7
biological_process	GO:0006893	Golgi to plasma membrane transport	1	2	0.5	0.826925	0.450363	1	1	G4MT76_MAGO7
molecular_function	GO:0004826	phenylalanine-tRNA ligase activity	1	3	0.333333	0.929241	0.413083	1	1	G4N9Z1_MAGO7
molecular_function	GO:0004376	glycolipid mannosyltransferase activity	1	3	0.333333	0.811408	0.588646	1	1	G4N7K4_MAGO7
biological_process	GO:0010515	negative regulation of induction of conjugation with cellular fusion	1	2	0.5	0.972966	0.30205	1	1	G4N7T3_MAGO7
biological_process	GO:0031030	negative regulation of septation initiation signaling	1	2	0.5	0.972966	0.30205	1	1	G4MP09_MAGO7
molecular_function	GO:0008703	5-amino-6-(5-phosphoribosylamino)uracil reductase activity	1	1	1	1	0.162712	1	1	G4NIN7_MAGO7
molecular_function	GO:0004694	eukaryotic translation initiation factor 2alpha kinase activity	1	1	1	1	0.162712	1	1	G4ML35_MAGO7
cellular_component	GO:0000123	histone acetyltransferase complex	1	1	1	0.999281	0.00328754	1	0.313	G4N1E0_MAGO7
biological_process	GO:0070156	mitochondrial phenylalanyl-tRNA aminoacylation	1	1	1	1	0.164542	1	1	G4N9Z1_MAGO7
molecular_function	GO:0004053	arginase activity	1	1	1	1	0.162712	1	1	G4N388_MAGO7
biological_process	GO:0006525	arginine metabolic process	1	1	1	0.954168	0.173075	1	1	G4N388_MAGO7
biological_process	GO:0000050	urea cycle	1	1	1	1	0.164542	1	1	G4N388_MAGO7
molecular_function	GO:0005546	phosphatidylinositol-4,5-bisphosphate binding	1	2	0.5	0.97355	0.298975	1	1	G4N7N3_MAGO7
biological_process	GO:0038203	TORC2 signaling	1	1	1	1	0.0044352	1	0.919	G4N7N3_MAGO7
molecular_function	GO:0045330	aspartyl esterase activity	1	1	1	1	0.162712	1	1	G4NB63_MAGO7
molecular_function	GO:0030599	pectinesterase activity	1	1	1	1	0.162712	1	1	G4NB63_MAGO7
biological_process	GO:0042545	cell wall modification	1	1	1	1	0.164542	1	1	G4NB63_MAGO7
biological_process	GO:0016071	mRNA metabolic process	1	2	0.5	0.738681	0.336027	1	1	G4N5K6_MAGO7
molecular_function	GO:0042281	dolichyl pyrophosphate Man9GlcNAc2 alpha-1,3-glucosyltransferase activity	1	1	1	1	0.162712	1	1	G4MQR3_MAGO7
biological_process	GO:0061780	mitotic cohesin loading	1	1	1	0.972966	0.30205	1	1	G4MV94_MAGO7
biological_process	GO:0010468	regulation of gene expression	1	1	1	0.999798	0.000365592	1	0.122	G4MV94_MAGO7
molecular_function	GO:0042300	beta-amyrin synthase activity	1	2	0.5	0.97355	0.298975	1	1	G4NED0_MAGO7
molecular_function	GO:0000250	lanosterol synthase activity	1	2	0.5	0.97355	0.298975	1	1	G4NED0_MAGO7
molecular_function	GO:0004370	glycerol kinase activity	1	2	0.5	0.97355	0.298975	1	1	G4MY61_MAGO7
biological_process	GO:0019563	glycerol catabolic process	1	2	0.5	0.871096	0.512977	1	1	G4MY61_MAGO7
molecular_function	GO:0045145	single-stranded DNA 5'-3' exodeoxyribonuclease activity	1	1	1	1	0.162712	1	1	G4ND20_MAGO7
molecular_function	GO:0004491	methylmalonate-semialdehyde dehydrogenase (acylating) activity	1	2	0.5	0.97355	0.298975	1	1	G4N5Q9_MAGO7
biological_process	GO:0009411	response to UV	1	1	1	0.907393	0.324223	1	1	G4N273_MAGO7
molecular_function	GO:0044016	histone acetyltransferase activity (H3-K4 specific)	1	1	1	1	0.162712	1	1	G4NIS4_MAGO7
biological_process	GO:0031452	negative regulation of heterochromatin assembly	1	1	1	1	0.164542	1	1	G4NIS4_MAGO7
biological_process	GO:0031453	positive regulation of heterochromatin assembly	1	1	1	0.972966	0.30205	1	1	G4NIS4_MAGO7
biological_process	GO:0006470	protein dephosphorylation	1	2	0.5	0.879672	0.314938	1	1	G4MNF1_MAGO7
biological_process	GO:0006335	DNA replication-dependent chromatin assembly	1	1	1	1	0.164542	1	1	G4N6F3_MAGO7
biological_process	GO:0090630	activation of GTPase activity	1	1	1	1	0.164542	1	1	G4NLV9_MAGO7
cellular_component	GO:0080008	Cul4-RING E3 ubiquitin ligase complex	1	1	1	1	0.161212	1	1	G4N7L0_MAGO7
biological_process	GO:1903775	regulation of DNA double-strand break processing	1	1	1	1	0.164542	1	1	G4N7L0_MAGO7
biological_process	GO:2001173	regulation of histone H2B conserved C-terminal lysine ubiquitination	1	1	1	1	0.164542	1	1	G4N7L0_MAGO7
molecular_function	GO:0033897	ribonuclease T2 activity	1	2	0.5	0.97355	0.298975	1	1	G4MS40_MAGO7
cellular_component	GO:0032592	integral component of mitochondrial membrane	1	2	0.5	0.920444	0.212941	1	1	G4ND67_MAGO7
molecular_function	GO:0004474	malate synthase activity	1	1	1	1	0.162712	1	1	G4NIW7_MAGO7
biological_process	GO:0071765	nuclear inner membrane organization	1	1	1	1	0.164542	1	1	G4NH87_MAGO7
cellular_component	GO:0071561	nucleus-vacuole junction	1	2	0.5	0.974041	0.296464	1	1	G4NKI8_MAGO7
biological_process	GO:0070158	mitochondrial seryl-tRNA aminoacylation	1	1	1	1	0.164542	1	1	G4N9X8_MAGO7
molecular_function	GO:0008177	succinate dehydrogenase (ubiquinone) activity	1	2	0.5	0.97355	0.298975	1	1	G4NE44_MAGO7
cellular_component	GO:1990071	TRAPPII protein complex	1	2	0.5	0.974041	0.296464	1	1	G4MMA7_MAGO7
cellular_component	GO:0030896	checkpoint clamp complex	1	2	0.5	0.974041	0.296464	1	1	G4N5P0_MAGO7
cellular_component	GO:0005745	m-AAA complex	1	1	1	1	0.161212	1	1	G4N151_MAGO7
biological_process	GO:0034622	protein-containing complex assembly	1	2	0.5	NA	NA	NA	NA	G4N151_MAGO7
biological_process	GO:0030163	protein catabolic process	1	1	1	0.188494	0.874272	1	1	G4N151_MAGO7
biological_process	GO:0046827	positive regulation of protein export from nucleus	1	2	0.5	0.972966	0.30205	1	1	G4N7T3_MAGO7
biological_process	GO:0042776	mitochondrial ATP synthesis coupled proton transport	1	2	0.5	0.972966	0.30205	1	1	G4N5K6_MAGO7
biological_process	GO:0031087	deadenylation-independent decapping of nuclear-transcribed mRNA	1	1	1	1	0.164542	1	1	G4MZ41_MAGO7
molecular_function	GO:0016274	protein-arginine N-methyltransferase activity	1	3	0.333333	0.992074	0.0584318	1	1	G4NHA5_MAGO7
molecular_function	GO:0004438	phosphatidylinositol-3-phosphatase activity	1	2	0.5	0.97355	0.298975	1	1	G4MP10_MAGO7
cellular_component	GO:0070603	SWI/SNF superfamily-type complex	1	2	0.5	0.948552	0.129996	1	1	G4MKE0_MAGO7
molecular_function	GO:0004691	cAMP-dependent protein kinase activity	1	1	1	1	0.162712	1	1	G4N7T3_MAGO7
biological_process	GO:0061987	negative regulation of transcription from RNA polymerase II promoter by glucose	1	1	1	0.984439	0.128904	1	1	G4N7T3_MAGO7
cellular_component	GO:0090443	FAR/SIN/STRIPAK complex	1	1	1	1	0.161212	1	1	G4MP09_MAGO7
biological_process	GO:0061509	asymmetric protein localization to old mitotic spindle pole body	1	1	1	1	0.164542	1	1	G4MP09_MAGO7
biological_process	GO:0030952	establishment or maintenance of cytoskeleton polarity	1	1	1	0.907393	0.324223	1	1	G4MP09_MAGO7
molecular_function	GO:0004932	mating-type factor pheromone receptor activity	1	2	0.5	0.97355	0.298975	1	1	G4N785_MAGO7
cellular_component	GO:0031942	i-AAA complex	1	1	1	1	0.161212	1	1	G4NH61_MAGO7
biological_process	GO:0051056	regulation of small GTPase mediated signal transduction	1	1	1	0.999863	0.00116726	1	0.392	G4NGY4_MAGO7
molecular_function	GO:0003922	GMP synthase (glutamine-hydrolyzing) activity	1	1	1	1	0.162712	1	1	G4NDG8_MAGO7
cellular_component	GO:0000126	transcription factor TFIIIB complex	1	2	0.5	0.974041	0.296464	1	1	G4NEF9_MAGO7
cellular_component	GO:0031262	Ndc80 complex	1	3	0.333333	0.930473	0.409933	1	1	G4NCT8_MAGO7
biological_process	GO:0051315	attachment of mitotic spindle microtubules to kinetochore	1	3	0.333333	0.807938	0.593206	1	1	G4NCT8_MAGO7
cellular_component	GO:0005824	outer plaque of spindle pole body	1	1	1	0.974041	0.296464	1	1	G4N038_MAGO7
molecular_function	GO:0036456	L-methionine-(S)-S-oxide reductase activity	1	1	1	1	0.162712	1	1	G4NFA9_MAGO7
molecular_function	GO:0008113	peptide-methionine (S)-S-oxide reductase activity	1	1	1	1	0.162712	1	1	G4NFA9_MAGO7
biological_process	GO:1990355	L-methionine salvage from methionine sulphoxide	1	1	1	1	0.164542	1	1	G4NFA9_MAGO7
molecular_function	GO:0004698	calcium-dependent protein kinase C activity	1	1	1	1	0.162712	1	1	G4NFW8_MAGO7
biological_process	GO:0032186	cellular bud neck septin ring organization	1	1	1	1	0.164542	1	1	G4NFW8_MAGO7
biological_process	GO:0010606	positive regulation of cytoplasmic mRNA processing body assembly	1	1	1	1	0.164542	1	1	G4NFW8_MAGO7
biological_process	GO:0060211	regulation of nuclear-transcribed mRNA poly(A) tail shortening	1	1	1	0.972966	0.30205	1	1	G4NFW8_MAGO7
biological_process	GO:0009612	response to mechanical stimulus	1	1	1	1	0.164542	1	1	G4NFW8_MAGO7
cellular_component	GO:0140671	ADA complex	1	1	1	NA	NA	NA	NA	G4N4E8_MAGO7
biological_process	GO:0035066	positive regulation of histone acetylation	1	1	1	0.972966	0.30205	1	1	G4N4E8_MAGO7
biological_process	GO:0010520	regulation of reciprocal meiotic recombination	1	1	1	1	0.164542	1	1	G4N4E8_MAGO7
biological_process	GO:1990414	replication-born double-strand break repair via sister chromatid exchange	1	1	1	1	0.164542	1	1	G4N4E8_MAGO7
molecular_function	GO:0019905	syntaxin binding	1	2	0.5	0.97355	0.298975	1	1	G4MRI9_MAGO7
biological_process	GO:0019746	hopanoid biosynthetic process	1	1	1	1	0.164542	1	1	G4NED0_MAGO7
molecular_function	GO:0030798	trans-aconitate 2-methyltransferase activity	1	1	1	1	0.162712	1	1	G4N631_MAGO7
molecular_function	GO:0003876	AMP deaminase activity	1	1	1	1	0.162712	1	1	G4MNK0_MAGO7
biological_process	GO:0032264	IMP salvage	1	1	1	1	0.164542	1	1	G4MNK0_MAGO7
molecular_function	GO:0000026	alpha-1,2-mannosyltransferase activity	1	1	1	0.929241	0.413083	1	1	G4N7K4_MAGO7
cellular_component	GO:1990873	intrinsic component of plasma membrane of cell tip	1	1	1	1	0.161212	1	1	G4MY59_MAGO7
cellular_component	GO:0032178	medial membrane band	1	1	1	1	0.161212	1	1	G4MY59_MAGO7
cellular_component	GO:0035842	old cell tip after activation of bipolar cell growth	1	1	1	1	0.161212	1	1	G4MY59_MAGO7
biological_process	GO:0051523	cell growth mode switching, monopolar to bipolar	1	1	1	1	0.164542	1	1	G4MY59_MAGO7
biological_process	GO:0030001	metal ion transport	1	1	1	0.914608	0.223988	1	1	G4N827_MAGO7
biological_process	GO:0000493	box H/ACA snoRNP assembly	1	1	1	1	0.164542	1	1	G4N8S8_MAGO7
biological_process	GO:0016074	sno(s)RNA metabolic process	1	1	1	0.611256	0.763026	1	1	G4N8S8_MAGO7
biological_process	GO:0051014	actin filament severing	1	1	1	0.871096	0.512977	1	1	G4N034_MAGO7
molecular_function	GO:0004748	ribonucleoside-diphosphate reductase activity, thioredoxin disulfide as acceptor	1	1	1	1	0.162712	1	1	G4MNY7_MAGO7
cellular_component	GO:0034271	phosphatidylinositol 3-kinase complex, class III, type I	1	1	1	1	0.161212	1	1	G4NKI8_MAGO7
cellular_component	GO:0034272	phosphatidylinositol 3-kinase complex, class III, type II	1	1	1	1	0.161212	1	1	G4NKI8_MAGO7
molecular_function	GO:0016303	1-phosphatidylinositol-3-kinase activity	1	1	1	1	0.162712	1	1	G4NKI8_MAGO7
biological_process	GO:2001159	regulation of protein localization by the Cvt pathway	1	1	1	1	0.164542	1	1	G4NKI8_MAGO7
molecular_function	GO:0008525	phosphatidylcholine transporter activity	1	1	1	1	0.0264499	1	1	G4NDN3_MAGO7
biological_process	GO:0031322	ascospore-type prospore-specific spindle pole body remodeling	1	1	1	1	0.164542	1	1	G4NDN3_MAGO7
cellular_component	GO:0005780	extrinsic component of intraperoxisomal membrane	1	1	1	1	0.161212	1	1	G4N7Q8_MAGO7
biological_process	GO:0045033	peroxisome inheritance	1	1	1	1	0.164542	1	1	G4N7Q8_MAGO7
cellular_component	GO:0030117	membrane coat	1	2	0.5	0.795326	0.377048	1	1	G4N974_MAGO7
molecular_function	GO:0004651	polynucleotide 5'-phosphatase activity	1	1	1	1	0.162712	1	1	G4N4L3_MAGO7
biological_process	GO:0006434	seryl-tRNA aminoacylation	1	1	1	1	0.0270343	1	1	G4MN13_MAGO7
biological_process	GO:1990260	negative regulation of transcription from RNA polymerase II promoter by transcription factor localization involved in response to DNA damage checkpoint signaling	1	1	1	1	0.164542	1	1	G4N6G2_MAGO7
molecular_function	GO:0009374	biotin binding	1	1	1	1	0.162712	1	1	G4N0N1_MAGO7
molecular_function	GO:0004736	pyruvate carboxylase activity	1	1	1	1	0.162712	1	1	G4N0N1_MAGO7
molecular_function	GO:0042799	histone methyltransferase activity (H4-K20 specific)	1	1	1	1	0.162712	1	1	G4N0C6_MAGO7
molecular_function	GO:0046923	ER retention sequence binding	1	2	0.5	0.97355	0.298975	1	1	G4MRH1_MAGO7
biological_process	GO:0006621	protein retention in ER lumen	1	3	0.333333	0.927767	0.416959	1	1	G4MRH1_MAGO7
molecular_function	GO:0004805	trehalose-phosphatase activity	1	1	1	1	0.162712	1	1	G4N8C1_MAGO7
biological_process	GO:0035970	peptidyl-threonine dephosphorylation	1	1	1	1	0.164542	1	1	G4N8C1_MAGO7
biological_process	GO:0000737	DNA catabolic process, endonucleolytic	1	1	1	0.972966	0.30205	1	1	G4MSU8_MAGO7
biological_process	GO:0098813	nuclear chromosome segregation	1	1	1	0.949618	0.0935124	1	1	G4N8I2_MAGO7
biological_process	GO:0000280	nuclear division	1	1	1	0.997702	0.00553042	1	0.928	G4N8I2_MAGO7
cellular_component	GO:0071627	integral component of fungal-type vacuolar membrane	1	1	1	1	0.161212	1	1	G4N514_MAGO7
molecular_function	GO:0044604	ABC-type phytochelatin transporter activity	1	1	1	1	0.162712	1	1	G4N514_MAGO7
biological_process	GO:0036249	cadmium ion import into vacuole	1	1	1	1	0.164542	1	1	G4N514_MAGO7
biological_process	GO:0098849	cellular detoxification of cadmium ion	1	1	1	1	0.164542	1	1	G4N514_MAGO7
biological_process	GO:0071996	glutathione transmembrane import into vacuole	1	1	1	1	0.164542	1	1	G4N514_MAGO7
biological_process	GO:0036246	phytochelatin 2 import into vacuole	1	1	1	1	0.164542	1	1	G4N514_MAGO7
molecular_function	GO:0017022	myosin binding	1	1	1	1	0.162712	1	1	G4NBP6_MAGO7
molecular_function	GO:0043621	protein self-association	1	1	1	1	0.162712	1	1	G4MTL1_MAGO7
biological_process	GO:0140018	regulation of cytoplasmic translational fidelity	1	1	1	1	0.164542	1	1	G4MTL1_MAGO7
biological_process	GO:0002926	tRNA wobble base 5-methoxycarbonylmethyl-2-thiouridinylation	1	1	1	1	0.164542	1	1	G4MTL1_MAGO7
molecular_function	GO:0005545	1-phosphatidylinositol binding	1	1	1	1	0.162712	1	1	G4N7C0_MAGO7
biological_process	GO:0048268	clathrin coat assembly	1	1	1	1	0.164542	1	1	G4N7C0_MAGO7
cellular_component	GO:0005891	voltage-gated calcium channel complex	1	1	1	1	0.161212	1	1	G4MNL6_MAGO7
molecular_function	GO:0005245	voltage-gated calcium channel activity	1	1	1	1	0.162712	1	1	G4MNL6_MAGO7
cellular_component	GO:0032777	Piccolo NuA4 histone acetyltransferase complex	1	1	1	0.974041	0.296464	1	1	G4MNE5_MAGO7
cellular_component	GO:0000445	THO complex part of transcription export complex	1	1	1	1	0.161212	1	1	G4MR38_MAGO7
molecular_function	GO:0004339	glucan 1,4-alpha-glucosidase activity	1	1	1	1	0.162712	1	1	G4NCF7_MAGO7
molecular_function	GO:0008108	UDP-glucose:hexose-1-phosphate uridylyltransferase activity	1	1	1	1	0.162712	1	1	G4N4E7_MAGO7
biological_process	GO:0033499	galactose catabolic process via UDP-galactose	1	1	1	1	0.164542	1	1	G4N4E7_MAGO7
molecular_function	GO:0047389	glycerophosphocholine phosphodiesterase activity	1	1	1	1	0.162712	1	1	G4ML67_MAGO7
biological_process	GO:0046475	glycerophospholipid catabolic process	1	1	1	1	0.0270343	1	1	G4ML67_MAGO7
molecular_function	GO:0004134	4-alpha-glucanotransferase activity	1	1	1	1	0.162712	1	1	G4NES1_MAGO7
molecular_function	GO:0004135	amylo-alpha-1,6-glucosidase activity	1	1	1	1	0.162712	1	1	G4NES1_MAGO7
biological_process	GO:0005980	glycogen catabolic process	1	1	1	0.927767	0.416959	1	1	G4NES1_MAGO7
biological_process	GO:0071985	multivesicular body sorting pathway	1	1	1	0.343458	0.903821	1	1	G4NCT4_MAGO7
molecular_function	GO:0019133	choline monooxygenase activity	1	1	1	1	0.162712	1	1	G4MVI0_MAGO7
biological_process	GO:0019285	glycine betaine biosynthetic process from choline	1	1	1	1	0.164542	1	1	G4MVI0_MAGO7
biological_process	GO:0031397	negative regulation of protein ubiquitination	1	1	1	1	0.164542	1	1	G4N688_MAGO7
biological_process	GO:1903940	negative regulation of TORC2 signaling	1	1	1	1	0.164542	1	1	G4N688_MAGO7
biological_process	GO:1900237	positive regulation of induction of conjugation with cellular fusion	1	1	1	1	0.164542	1	1	G4N688_MAGO7
molecular_function	GO:0004114	3',5'-cyclic-nucleotide phosphodiesterase activity	1	1	1	0.97355	0.298975	1	1	G4MP01_MAGO7
biological_process	GO:0060249	anatomical structure homeostasis	1	1	1	0.922226	0.191013	1	1	G4NEA8_MAGO7
biological_process	GO:0010833	telomere maintenance via telomere lengthening	1	1	1	0.927767	0.416959	1	1	G4NEA8_MAGO7
molecular_function	GO:0008453	alanine-glyoxylate transaminase activity	1	1	1	1	0.162712	1	1	G4MKD2_MAGO7
cellular_component	GO:0045281	succinate dehydrogenase complex	1	1	1	1	0.161212	1	1	G4N2P5_MAGO7
molecular_function	GO:0000104	succinate dehydrogenase activity	1	1	1	0.995705	0.0707588	1	1	G4N2P5_MAGO7
molecular_function	GO:0004867	serine-type endopeptidase inhibitor activity	1	1	1	1	0.162712	1	1	G4N6E8_MAGO7
biological_process	GO:0007323	peptide pheromone maturation	1	1	1	1	0.164542	1	1	G4N6E8_MAGO7
molecular_function	GO:0000213	tRNA-intron endonuclease activity	1	2	0.5	0.97355	0.298975	1	1	G4MS27_MAGO7
molecular_function	GO:0046558	arabinan endo-1,5-alpha-L-arabinosidase activity	1	1	1	1	0.162712	1	1	G4MQZ5_MAGO7
cellular_component	GO:0044666	MLL3/4 complex	1	1	1	1	0.161212	1	1	G4NCQ5_MAGO7
molecular_function	GO:0004151	dihydroorotase activity	1	1	1	1	0.162712	1	1	G4NJG9_MAGO7
biological_process	GO:0019856	pyrimidine nucleobase biosynthetic process	1	1	1	0.99176	0.0600933	1	1	G4NJG9_MAGO7
biological_process	GO:0035023	regulation of Rho protein signal transduction	1	1	1	1	0.0270343	1	1	G4N0E4_MAGO7
molecular_function	GO:0000995	RNA polymerase III general transcription initiation factor activity	1	1	1	1	0.162712	1	1	G4NEF9_MAGO7
biological_process	GO:0070897	transcription preinitiation complex assembly	1	1	1	0.737394	0.504207	1	1	G4NEF9_MAGO7
biological_process	GO:0007120	axial cellular bud site selection	1	1	1	1	0.164542	1	1	G4NJ72_MAGO7
biological_process	GO:0045184	establishment of protein localization	1	1	1	0.999842	0.000288976	1	0.096	G4NJ72_MAGO7
biological_process	GO:0032507	maintenance of protein location in cell	1	1	1	0.995754	0.0230643	1	0.999	G4NJ72_MAGO7
biological_process	GO:2001108	positive regulation of Rho guanyl-nucleotide exchange factor activity	1	1	1	1	0.164542	1	1	G4NJ72_MAGO7
biological_process	GO:0035025	positive regulation of Rho protein signal transduction	1	1	1	1	0.164542	1	1	G4NJ72_MAGO7
biological_process	GO:2000114	regulation of establishment of cell polarity	1	1	1	1	0.164542	1	1	G4NJ72_MAGO7
biological_process	GO:0048208	COPII vesicle coating	1	1	1	0.972966	0.30205	1	1	G4NGP7_MAGO7
biological_process	GO:0061640	cytoskeleton-dependent cytokinesis	1	1	1	0.955421	0.117052	1	1	G5EI03_MAGO7
molecular_function	GO:0052917	dolichyl-P-Man:Man(7)GlcNAc(2)-PP-dolichol alpha-1,6-mannosyltransferase	1	1	1	1	0.162712	1	1	G4MR62_MAGO7
molecular_function	GO:0008474	palmitoyl-(protein) hydrolase activity	1	1	1	1	0.162712	1	1	G4N348_MAGO7
biological_process	GO:0002084	protein depalmitoylation	1	1	1	1	0.164542	1	1	G4N348_MAGO7
cellular_component	GO:0005672	transcription factor TFIIA complex	0	3	0	0.590067	1	1	1
molecular_function	GO:0000979	RNA polymerase II core promoter sequence-specific DNA binding	0	2	0	0.701025	1	1	1
biological_process	GO:0060261	positive regulation of transcription initiation from RNA polymerase II promoter	0	2	0	0.549637	0.802109	1	1
biological_process	GO:0051123	RNA polymerase II preinitiation complex assembly	0	7	0	0.541093	0.733989	1	1
cellular_component	GO:0000815	ESCRT III complex	0	2	0	0.703536	1	1	1
biological_process	GO:1904669	ATP export	0	4	0	0.487023	1	1	1
biological_process	GO:0071454	cellular response to anoxia	0	1	0	0.835458	1	1	1
biological_process	GO:1904902	ESCRT III complex assembly	0	1	0	0.835458	1	1	1
biological_process	GO:0070676	intralumenal vesicle formation	0	3	0	0.583041	1	1	1
biological_process	GO:0043328	protein transport to vacuole involved in ubiquitin-dependent protein catabolic process via the multivesicular body sorting pathway	0	5	0	0.406794	1	1	1
biological_process	GO:0061709	reticulophagy	0	3	0	0.583041	1	1	1
cellular_component	GO:0005763	mitochondrial small ribosomal subunit	0	7	0	0.291862	1	1	1
biological_process	GO:0090114	COPII-coated vesicle budding	0	2	0	0.871096	0.512977	1	1
molecular_function	GO:0030628	pre-mRNA 3'-splice site binding	0	1	0	0.837288	1	1	1
cellular_component	GO:0000346	transcription export complex	0	1	0	0.974041	0.296464	1	1
biological_process	GO:0031124	mRNA 3'-end processing	0	5	0	0.588077	0.697312	1	1
biological_process	GO:0006283	transcription-coupled nucleotide-excision repair	0	2	0	0.69795	1	1	1
biological_process	GO:0000425	pexophagy	0	2	0	0.69795	1	1	1
biological_process	GO:0007039	protein catabolic process in the vacuole	0	1	0	0.835458	1	1	1
molecular_function	GO:0015035	protein-disulfide reductase activity	0	3	0	0.444651	0.858501	1	1
biological_process	GO:0006662	glycerol ether metabolic process	0	1	0	0.835458	1	1	1
cellular_component	GO:0071004	U2-type prespliceosome	0	8	0	0.244738	1	1	1
molecular_function	GO:1990446	U1 snRNP binding	0	2	0	0.701025	1	1	1
molecular_function	GO:1990447	U2 snRNP binding	0	1	0	0.837288	1	1	1
biological_process	GO:1903241	U2-type prespliceosome assembly	0	1	0	0.835458	1	1	1
biological_process	GO:0034553	mitochondrial respiratory chain complex II assembly	0	1	0	0.835458	1	1	1
molecular_function	GO:0004301	epoxide hydrolase activity	0	1	0	0.837288	1	1	1
biological_process	GO:0043171	peptide catabolic process	0	2	0	0.86934	0.388744	1	1
molecular_function	GO:0031419	cobalamin binding	0	2	0	0.701025	1	1	1
molecular_function	GO:0050086	mannitol 2-dehydrogenase activity	0	1	0	0.837288	1	1	1
biological_process	GO:1990120	messenger ribonucleoprotein complex assembly	0	1	0	0.835458	1	1	1
biological_process	GO:0071042	nuclear polyadenylation-dependent mRNA catabolic process	0	1	0	0.835458	1	1	1
cellular_component	GO:1990726	Lsm1-7-Pat1 complex	0	3	0	0.590067	1	1	1
cellular_component	GO:0005688	U6 snRNP	0	4	0	0.494878	1	1	1
biological_process	GO:0070084	protein initiator methionine removal	0	3	0	0.583041	1	1	1
molecular_function	GO:0004755	saccharopine dehydrogenase (NADP+, L-glutamate-forming) activity	0	1	0	0.837288	1	1	1
biological_process	GO:0019878	lysine biosynthetic process via aminoadipic acid	0	5	0	0.406794	1	1	1
cellular_component	GO:0042025	host cell nucleus	0	10	0	0.172064	1	1	1
molecular_function	GO:0003855	3-dehydroquinate dehydratase activity	0	5	0	0.411354	1	1	1
biological_process	GO:0046279	3,4-dihydroxybenzoate biosynthetic process	0	1	0	0.835458	1	1	1
biological_process	GO:0019630	quinate metabolic process	0	1	0	0.835458	1	1	1
cellular_component	GO:0071008	U2-type post-mRNA release spliceosomal complex	0	2	0	0.703536	1	1	1
molecular_function	GO:0004402	histone acetyltransferase activity	0	5	0	0.617024	0.758701	1	1
molecular_function	GO:0004708	MAP kinase kinase activity	0	3	0	0.586917	1	1	1
biological_process	GO:0000196	cell wall integrity MAPK cascade	0	2	0	0.871096	0.512977	1	1
biological_process	GO:0000165	MAPK cascade	0	3	0	0.388506	0.8848	1	1
biological_process	GO:0075018	positive regulation of appressorium formation	0	3	0	0.583041	1	1	1
biological_process	GO:0050850	positive regulation of calcium-mediated signaling	0	2	0	0.69795	1	1	1
biological_process	GO:0016126	sterol biosynthetic process	0	8	0	0.0389794	1	0.992	1
molecular_function	GO:0008409	5'-3' exonuclease activity	0	1	0	0.909838	0.319075	1	1
molecular_function	GO:0061981	3-hydroxykynureninase activity	0	1	0	0.837288	1	1	1
molecular_function	GO:0030429	kynureninase activity	0	1	0	0.837288	1	1	1
biological_process	GO:0034354	'de novo' NAD biosynthetic process from tryptophan	0	4	0	0.487023	1	1	1
biological_process	GO:0043420	anthranilate metabolic process	0	3	0	0.583041	1	1	1
biological_process	GO:0097053	L-kynurenine catabolic process	0	1	0	0.835458	1	1	1
biological_process	GO:0019805	quinolinate biosynthetic process	0	3	0	0.583041	1	1	1
biological_process	GO:0006569	tryptophan catabolic process	0	3	0	0.733715	0.562068	1	1
cellular_component	GO:0070469	respirasome	0	13	0	0.0295148	0.995787	0.781	1
molecular_function	GO:0009916	alternative oxidase activity	0	1	0	0.837288	1	1	1
molecular_function	GO:0016162	cellulose 1,4-beta-cellobiosidase activity	0	1	0	0.837288	1	1	1
molecular_function	GO:0034512	box C/D RNA binding	0	1	0	0.837288	1	1	1
cellular_component	GO:0022627	cytosolic small ribosomal subunit	0	10	0	0.172064	1	1	1
molecular_function	GO:0001965	G-protein alpha-subunit binding	0	1	0	0.837288	1	1	1
biological_process	GO:0007186	G protein-coupled receptor signaling pathway	0	5	0	0.611256	0.763026	1	1
biological_process	GO:0061157	mRNA destabilization	0	1	0	0.808987	0.383091	1	1
biological_process	GO:1902660	negative regulation of glucose mediated signaling pathway	0	4	0	0.487023	1	1	1
biological_process	GO:2001125	negative regulation of translational frameshifting	0	1	0	0.835458	1	1	1
biological_process	GO:0001934	positive regulation of protein phosphorylation	0	1	0	0.807938	0.593206	1	1
biological_process	GO:2000765	regulation of cytoplasmic translation	0	1	0	0.995565	0.0722326	1	1
biological_process	GO:0032995	regulation of fungal-type cell wall biogenesis	0	1	0	0.69795	1	1	1
biological_process	GO:1990116	ribosome-associated ubiquitin-dependent protein catabolic process	0	3	0	0.583041	1	1	1
cellular_component	GO:0000786	nucleosome	0	9	0	0.205213	1	1	1
biological_process	GO:0051984	positive regulation of chromosome segregation	0	2	0	0.339762	1	1	1
biological_process	GO:1905342	positive regulation of protein localization to kinetochore	0	1	0	0.835458	1	1	1
biological_process	GO:0032933	SREBP signaling pathway	0	3	0	0.283759	1	1	1
molecular_function	GO:0008495	protoheme IX farnesyltransferase activity	0	1	0	0.837288	1	1	1
biological_process	GO:0048034	heme O biosynthetic process	0	1	0	0.835458	1	1	1
cellular_component	GO:0030956	glutamyl-tRNA(Gln) amidotransferase complex	0	2	0	0.703536	1	1	1
molecular_function	GO:0050567	glutaminyl-tRNA synthase (glutamine-hydrolyzing) activity	0	2	0	0.701025	1	1	1
biological_process	GO:0070681	glutaminyl-tRNAGln biosynthesis via transamidation	0	2	0	0.69795	1	1	1
biological_process	GO:0032543	mitochondrial translation	0	14	0	0.303756	0.882985	1	1
cellular_component	GO:0005854	nascent polypeptide-associated complex	0	3	0	0.590067	1	1	1
biological_process	GO:0051083	'de novo' cotranslational protein folding	0	3	0	0.583041	1	1	1
molecular_function	GO:0004042	acetyl-CoA:L-glutamate N-acetyltransferase activity	0	2	0	0.701025	1	1	1
molecular_function	GO:0103045	methione N-acyltransferase activity	0	2	0	0.701025	1	1	1
molecular_function	GO:0051731	polynucleotide 5'-hydroxyl-kinase activity	0	2	0	0.873573	0.508635	1	1
molecular_function	GO:0036218	dTTP diphosphatase activity	0	1	0	0.837288	1	1	1
molecular_function	GO:0035529	NADH pyrophosphatase activity	0	1	0	0.837288	1	1	1
biological_process	GO:0009204	deoxyribonucleoside triphosphate catabolic process	0	1	0	0.69795	1	1	1
biological_process	GO:0009117	nucleotide metabolic process	0	5	0	0.0904549	0.947477	1	1
cellular_component	GO:0030430	host cell cytoplasm	0	2	0	0.590067	1	1	1
molecular_function	GO:0050584	linoleate 11-lipoxygenase activity	0	1	0	0.837288	1	1	1
molecular_function	GO:1990136	linoleate 9S-lipoxygenase activity	0	1	0	0.837288	1	1	1
biological_process	GO:0043651	linoleic acid metabolic process	0	1	0	0.835458	1	1	1
cellular_component	GO:0030176	integral component of endoplasmic reticulum membrane	0	13	0	0.124953	0.975294	1	1
molecular_function	GO:0120013	lipid transfer activity	0	2	0	0.873573	0.508635	1	1
biological_process	GO:0015917	aminophospholipid transport	0	1	0	0.835458	1	1	1
biological_process	GO:0070096	mitochondrial outer membrane translocase complex assembly	0	3	0	0.583041	1	1	1
biological_process	GO:1990456	mitochondrion-endoplasmic reticulum membrane tethering	0	3	0	0.583041	1	1	1
biological_process	GO:0045040	protein insertion into mitochondrial outer membrane	0	5	0	0.406794	1	1	1
molecular_function	GO:0003856	3-dehydroquinate synthase activity	0	1	0	0.837288	1	1	1
molecular_function	GO:0003866	3-phosphoshikimate 1-carboxyvinyltransferase activity	0	1	0	0.837288	1	1	1
molecular_function	GO:0004764	shikimate 3-dehydrogenase (NADP+) activity	0	4	0	0.491365	1	1	1
molecular_function	GO:0004765	shikimate kinase activity	0	1	0	0.837288	1	1	1
cellular_component	GO:0098562	cytoplasmic side of membrane	0	1	0	0.348046	1	1	1
biological_process	GO:0045900	negative regulation of translational elongation	0	1	0	0.69795	1	1	1
biological_process	GO:0033962	P-body assembly	0	1	0	0.972966	0.30205	1	1
biological_process	GO:0045727	positive regulation of translation	0	2	0	0.733715	0.562068	1	1
biological_process	GO:0010603	regulation of cytoplasmic mRNA processing body assembly	0	1	0	0.972966	0.30205	1	1
molecular_function	GO:0036002	pre-mRNA binding	0	1	0	0.811408	0.588646	1	1
biological_process	GO:0045787	positive regulation of cell cycle	0	1	0	0.616909	0.626928	1	1
biological_process	GO:0033120	positive regulation of RNA splicing	0	1	0	0.835458	1	1	1
biological_process	GO:0000387	spliceosomal snRNP assembly	0	7	0	0.826925	0.450363	1	1
molecular_function	GO:0003838	sterol 24-C-methyltransferase activity	0	3	0	0.586917	1	1	1
cellular_component	GO:0005965	protein farnesyltransferase complex	0	1	0	0.838788	1	1	1
molecular_function	GO:0004660	protein farnesyltransferase activity	0	1	0	0.837288	1	1	1
biological_process	GO:0061951	establishment of protein localization to plasma membrane	0	1	0	0.549637	0.802109	1	1
biological_process	GO:0018343	protein farnesylation	0	1	0	0.835458	1	1	1
cellular_component	GO:0044614	nuclear pore cytoplasmic filaments	0	1	0	0.838788	1	1	1
cellular_component	GO:0005844	polysome	0	6	0	0.621735	0.755262	1	1
molecular_function	GO:0000822	inositol hexakisphosphate binding	0	2	0	0.701025	1	1	1
biological_process	GO:0006415	translational termination	0	2	0	0.339762	1	1	1
biological_process	GO:0006409	tRNA export from nucleus	0	1	0	0.927767	0.416959	1	1
molecular_function	GO:0008926	mannitol-1-phosphate 5-dehydrogenase activity	0	1	0	0.837288	1	1	1
biological_process	GO:0019594	mannitol metabolic process	0	1	0	0.835458	1	1	1
molecular_function	GO:0008234	cysteine-type peptidase activity	0	4	0	0.978437	0.0497097	1	1
biological_process	GO:0006915	apoptotic process	0	6	0	0.611256	0.763026	1	1
cellular_component	GO:0019008	molybdopterin synthase complex	0	3	0	0.590067	1	1	1
molecular_function	GO:0030366	molybdopterin synthase activity	0	2	0	0.701025	1	1	1
biological_process	GO:0006777	Mo-molybdopterin cofactor biosynthetic process	0	8	0	0.236974	1	1	1
molecular_function	GO:0008265	Mo-molybdopterin cofactor sulfurase activity	0	1	0	0.837288	1	1	1
molecular_function	GO:0102867	molybdenum cofactor sulfurtransferase activity	0	1	0	0.837288	1	1	1
molecular_function	GO:0030151	molybdenum ion binding	0	7	0	0.288264	1	1	1
molecular_function	GO:0008641	ubiquitin-like modifier activating enzyme activity	0	3	0	0.617024	0.758701	1	1
molecular_function	GO:0004424	imidazoleglycerol-phosphate dehydratase activity	0	1	0	0.837288	1	1	1
biological_process	GO:0000105	histidine biosynthetic process	0	7	0	0.283759	1	1	1
molecular_function	GO:0098808	mRNA cap binding	0	1	0	0.837288	1	1	1
biological_process	GO:0002191	cap-dependent translational initiation	0	1	0	0.835458	1	1	1
cellular_component	GO:0005834	heterotrimeric G-protein complex	0	3	0	0.590067	1	1	1
molecular_function	GO:0001664	G protein-coupled receptor binding	0	3	0	0.586917	1	1	1
molecular_function	GO:0031683	G-protein beta/gamma-subunit complex binding	0	4	0	0.491365	1	1	1
molecular_function	GO:0043715	2,3-diketo-5-methylthiopentyl-1-phosphate enolase activity	0	1	0	0.837288	1	1	1
molecular_function	GO:0043716	2-hydroxy-3-keto-5-methylthiopentenyl-1-phosphate phosphatase activity	0	1	0	0.837288	1	1	1
molecular_function	GO:0043874	acireductone synthase activity	0	1	0	0.837288	1	1	1
biological_process	GO:0019509	L-methionine salvage from methylthioadenosine	0	5	0	0.406794	1	1	1
biological_process	GO:0019284	L-methionine salvage from S-adenosylmethionine	0	3	0	0.583041	1	1	1
cellular_component	GO:0009277	fungal-type cell wall	0	3	0	0.415027	1	1	1
molecular_function	GO:0005199	structural constituent of cell wall	0	4	0	0.491365	1	1	1
cellular_component	GO:0000328	fungal-type vacuole lumen	0	2	0	0.703536	1	1	1
molecular_function	GO:0032934	sterol binding	0	3	0	0.586917	1	1	1
biological_process	GO:0032366	intracellular sterol transport	0	2	0	0.69795	1	1	1
cellular_component	GO:0005787	signal peptidase complex	0	4	0	0.494878	1	1	1
biological_process	GO:0045047	protein targeting to ER	0	3	0	0.697666	0.547466	1	1
biological_process	GO:0007534	gene conversion at mating-type locus	0	1	0	0.835458	1	1	1
biological_process	GO:0043570	maintenance of DNA repeat elements	0	1	0	0.871096	0.512977	1	1
biological_process	GO:0007131	reciprocal meiotic recombination	0	2	0	0.939907	0.258047	1	1
biological_process	GO:1902413	negative regulation of mitotic cytokinesis	0	1	0	0.69795	1	1	1
biological_process	GO:1905665	positive regulation of calcium ion import across plasma membrane	0	1	0	0.835458	1	1	1
biological_process	GO:0106259	cell-to-cell migration in host	0	1	0	0.835458	1	1	1
biological_process	GO:0030448	hyphal growth	0	1	0	0.835458	1	1	1
biological_process	GO:0000921	septin ring assembly	0	3	0	0.583041	1	1	1
cellular_component	GO:0044233	mitochondria-associated endoplasmic reticulum membrane	0	1	0	0.749934	0.651954	1	1
biological_process	GO:0000266	mitochondrial fission	0	5	0	0.339762	1	1	1
biological_process	GO:0007006	mitochondrial membrane organization	0	1	0	0.0802937	1	1	1
biological_process	GO:1902953	positive regulation of ER to Golgi vesicle-mediated transport	0	2	0	0.69795	1	1	1
biological_process	GO:0070863	positive regulation of protein exit from endoplasmic reticulum	0	2	0	0.69795	1	1	1
biological_process	GO:0003400	regulation of COPII vesicle coating	0	1	0	0.835458	1	1	1
biological_process	GO:0016050	vesicle organization	0	4	0	0.411572	0.822016	1	1
cellular_component	GO:0032541	cortical endoplasmic reticulum	0	3	0	0.494878	1	1	1
biological_process	GO:0048309	endoplasmic reticulum inheritance	0	1	0	0.835458	1	1	1
biological_process	GO:0016320	endoplasmic reticulum membrane fusion	0	1	0	0.835458	1	1	1
molecular_function	GO:0004019	adenylosuccinate synthase activity	0	1	0	0.837288	1	1	1
molecular_function	GO:0016208	AMP binding	0	4	0	0.491365	1	1	1
molecular_function	GO:0019002	GMP binding	0	1	0	0.837288	1	1	1
molecular_function	GO:0061483	sulfinylpropanyl adenylate synthase	0	1	0	0.837288	1	1	1
biological_process	GO:0044208	'de novo' AMP biosynthetic process	0	2	0	0.69795	1	1	1
biological_process	GO:0071276	cellular response to cadmium ion	0	1	0	0.972966	0.30205	1	1
biological_process	GO:0006106	fumarate metabolic process	0	3	0	0.487023	1	1	1
molecular_function	GO:0102339	3-oxo-arachidoyl-CoA reductase activity	0	1	0	0.837288	1	1	1
molecular_function	GO:0102340	3-oxo-behenoyl-CoA reductase activity	0	1	0	0.837288	1	1	1
molecular_function	GO:0102342	3-oxo-cerotoyl-CoA reductase activity	0	1	0	0.837288	1	1	1
molecular_function	GO:0102341	3-oxo-lignoceroyl-CoA reductase activity	0	1	0	0.837288	1	1	1
molecular_function	GO:0045703	ketoreductase activity	0	1	0	0.837288	1	1	1
biological_process	GO:0030497	fatty acid elongation	0	1	0	0.835458	1	1	1
cellular_component	GO:0031251	PAN complex	0	2	0	0.703536	1	1	1
molecular_function	GO:0004535	poly(A)-specific ribonuclease activity	0	3	0	0.586917	1	1	1
cellular_component	GO:0009349	riboflavin synthase complex	0	1	0	0.838788	1	1	1
molecular_function	GO:0000906	6,7-dimethyl-8-ribityllumazine synthase activity	0	1	0	0.837288	1	1	1
biological_process	GO:0050821	protein stabilization	0	4	0	0.487023	1	1	1
biological_process	GO:0000469	cleavage involved in rRNA processing	0	3	0	0.0309048	0.995565	0.979	1
cellular_component	GO:0036266	Cdc48p-Npl4p-Vms1p AAA ATPase complex	0	1	0	0.838788	1	1	1
cellular_component	GO:0000837	Doa10p ubiquitin ligase complex	0	2	0	0.703536	1	1	1
cellular_component	GO:0000839	Hrd1p ubiquitin ligase ERAD-L complex	0	2	0	0.703536	1	1	1
cellular_component	GO:0042175	nuclear outer membrane-endoplasmic reticulum membrane network	0	4	0	0.552604	0.537481	1	1
cellular_component	GO:0048471	perinuclear region of cytoplasm	0	2	0	0.348046	1	1	1
cellular_component	GO:0030894	replisome	0	1	0	0.967663	0.185718	1	1
cellular_component	GO:1990112	RQC complex	0	2	0	0.703536	1	1	1
cellular_component	GO:0034098	VCP-NPL4-UFD1 AAA ATPase complex	0	1	0	0.838788	1	1	1
biological_process	GO:0071629	cytoplasm protein quality control by the ubiquitin-proteasome system	0	4	0	0.487023	1	1	1
biological_process	GO:0006274	DNA replication termination	0	1	0	0.69795	1	1	1
biological_process	GO:0071712	ER-associated misfolded protein catabolic process	0	1	0	0.835458	1	1	1
biological_process	GO:0072671	mitochondria-associated ubiquitin-dependent protein catabolic process	0	2	0	0.69795	1	1	1
biological_process	GO:0051228	mitotic spindle disassembly	0	2	0	0.69795	1	1	1
biological_process	GO:0051974	negative regulation of telomerase activity	0	1	0	0.835458	1	1	1
biological_process	GO:0070651	nonfunctional rRNA decay	0	4	0	0.487023	1	1	1
biological_process	GO:1900182	positive regulation of protein localization to nucleus	0	2	0	0.69795	1	1	1
biological_process	GO:0072665	protein localization to vacuole	0	2	0	0.657346	0.588428	1	1
biological_process	GO:0030970	retrograde protein transport, ER to cytosol	0	2	0	0.69795	1	1	1
molecular_function	GO:0008686	3,4-dihydroxy-2-butanone-4-phosphate synthase activity	0	1	0	0.837288	1	1	1
molecular_function	GO:0015187	glycine transmembrane transporter activity	0	1	0	0.837288	1	1	1
biological_process	GO:1904983	glycine import into mitochondrion	0	1	0	0.835458	1	1	1
biological_process	GO:0006783	heme biosynthetic process	0	3	0	0.266011	0.932972	1	1
cellular_component	GO:0061700	GATOR2 complex	0	1	0	0.838788	1	1	1
biological_process	GO:0051664	nuclear pore localization	0	1	0	0.835458	1	1	1
biological_process	GO:1904263	positive regulation of TORC1 signaling	0	2	0	0.69795	1	1	1
molecular_function	GO:0030411	scytalone dehydratase activity	0	1	0	0.837288	1	1	1
biological_process	GO:0042438	melanin biosynthetic process	0	4	0	0.487023	1	1	1
molecular_function	GO:0047834	D-threo-aldose 1-dehydrogenase activity	0	24	0	0.0139516	1	0.667	1
cellular_component	GO:0033557	Slx1-Slx4 complex	0	2	0	0.703536	1	1	1
molecular_function	GO:0070039	rRNA (guanosine-2'-O-)-methyltransferase activity	0	1	0	0.837288	1	1	1
molecular_function	GO:0008650	rRNA (uridine-2'-O-)-methyltransferase activity	0	2	0	0.701025	1	1	1
biological_process	GO:0000453	enzyme-directed rRNA 2'-O-methylation	0	1	0	0.835458	1	1	1
cellular_component	GO:0005875	microtubule associated complex	0	1	0	0.983856	0.0608099	1	1
molecular_function	GO:0070840	dynein complex binding	0	1	0	0.837288	1	1	1
biological_process	GO:0000132	establishment of mitotic spindle orientation	0	1	0	0.835458	1	1	1
biological_process	GO:0051012	microtubule sliding	0	1	0	0.835458	1	1	1
biological_process	GO:0000028	ribosomal small subunit assembly	0	1	0	0.69795	1	1	1
cellular_component	GO:0005615	extracellular space	0	13	0	0.1014	1	0.998	1
cellular_component	GO:0005761	mitochondrial ribosome	0	2	0	0.02948	1	0.764	1
molecular_function	GO:0031593	polyubiquitin modification-dependent protein binding	0	3	0	0.586917	1	1	1
molecular_function	GO:0043495	protein-membrane adaptor activity	0	2	0	0.586917	1	1	1
biological_process	GO:0031145	anaphase-promoting complex-dependent catabolic process	0	7	0	0.283759	1	1	1
biological_process	GO:0007091	metaphase/anaphase transition of mitotic cell cycle	0	1	0	0.974444	0.0853923	1	1
biological_process	GO:0007052	mitotic spindle organization	0	3	0	0.437932	0.862024	1	1
biological_process	GO:0071630	nuclear protein quality control by the ubiquitin-proteasome system	0	1	0	0.835458	1	1	1
biological_process	GO:0031144	proteasome localization	0	1	0	0.835458	1	1	1
cellular_component	GO:0033116	endoplasmic reticulum-Golgi intermediate compartment membrane	0	1	0	0.838788	1	1	1
biological_process	GO:0070072	vacuolar proton-transporting V-type ATPase complex assembly	0	4	0	0.487023	1	1	1
biological_process	GO:0071467	cellular response to pH	0	1	0	0.972966	0.30205	1	1
molecular_function	GO:0051020	GTPase binding	0	1	0	0.941207	0.155893	1	1
biological_process	GO:0006354	DNA-templated transcription, elongation	0	2	0	0.0944997	0.973481	1	1
biological_process	GO:0006402	mRNA catabolic process	0	3	0	0.891561	0.194435	1	1
biological_process	GO:0106035	protein maturation by [4Fe-4S] cluster transfer	0	3	0	0.583041	1	1	1
molecular_function	GO:0046570	methylthioribulose 1-phosphate dehydratase activity	0	1	0	0.837288	1	1	1
molecular_function	GO:0032866	D-xylose:NADP reductase activity	0	1	0	0.837288	1	1	1
biological_process	GO:0042843	D-xylose catabolic process	0	1	0	0.835458	1	1	1
molecular_function	GO:0047039	tetrahydroxynaphthalene reductase activity	0	1	0	0.837288	1	1	1
molecular_function	GO:0061605	molybdopterin-synthase adenylyltransferase activity	0	1	0	0.837288	1	1	1
molecular_function	GO:0061604	molybdopterin-synthase sulfurtransferase activity	0	1	0	0.837288	1	1	1
molecular_function	GO:0070733	protein adenylyltransferase activity	0	2	0	0.701025	1	1	1
molecular_function	GO:0042292	URM1 activating enzyme activity	0	1	0	0.837288	1	1	1
biological_process	GO:0007114	cell budding	0	1	0	0.965833	0.192062	1	1
biological_process	GO:0032447	protein urmylation	0	5	0	0.406794	1	1	1
biological_process	GO:2000220	regulation of pseudohyphal growth	0	1	0	0.835458	1	1	1
biological_process	GO:0002143	tRNA wobble position uridine thiolation	0	4	0	0.487023	1	1	1
biological_process	GO:0005993	trehalose catabolic process	0	2	0	0.583041	1	1	1
molecular_function	GO:0043021	ribonucleoprotein complex binding	0	4	0	0.226081	0.920642	1	1
molecular_function	GO:0061631	ubiquitin conjugating enzyme activity	0	4	0	0.491365	1	1	1
biological_process	GO:0008156	negative regulation of DNA replication	0	1	0	0.939907	0.258047	1	1
cellular_component	GO:0070545	PeBoW complex	0	2	0	0.703536	1	1	1
biological_process	GO:0110136	protein-RNA complex remodeling	0	2	0	0.69795	1	1	1
biological_process	GO:0000730	DNA recombinase assembly	0	2	0	0.69795	1	1	1
biological_process	GO:0045002	double-strand break repair via single-strand annealing	0	1	0	0.835458	1	1	1
molecular_function	GO:0106073	dolichyl pyrophosphate Glc2Man9GlcNAc2 alpha-1,2-glucosyltransferase activity	0	1	0	0.837288	1	1	1
molecular_function	GO:0008120	ceramide glucosyltransferase activity	0	1	0	0.837288	1	1	1
molecular_function	GO:0102769	dihydroceramide glucosyltransferase activity	0	1	0	0.837288	1	1	1
biological_process	GO:0006665	sphingolipid metabolic process	0	6	0	0.373072	0.844968	1	1
cellular_component	GO:0061908	phagophore	0	2	0	0.703536	1	1	1
molecular_function	GO:0019776	Atg8 ligase activity	0	1	0	0.837288	1	1	1
biological_process	GO:0006501	C-terminal protein lipidation	0	1	0	0.835458	1	1	1
biological_process	GO:0044805	late nucleophagy	0	2	0	0.69795	1	1	1
biological_process	GO:0034727	piecemeal microautophagy of the nucleus	0	2	0	0.583041	1	1	1
biological_process	GO:0006612	protein targeting to membrane	0	4	0	0.657346	0.588428	1	1
cellular_component	GO:1990316	Atg1/ULK1 kinase complex	0	2	0	0.703536	1	1	1
cellular_component	GO:0097635	extrinsic component of autophagosome membrane	0	1	0	0.838788	1	1	1
cellular_component	GO:0120095	vacuole-isolation membrane contact site	0	1	0	0.838788	1	1	1
biological_process	GO:0048102	autophagic cell death	0	2	0	0.69795	1	1	1
biological_process	GO:0120164	conidium germination	0	1	0	0.835458	1	1	1
biological_process	GO:0075307	positive regulation of conidium formation	0	1	0	0.835458	1	1	1
biological_process	GO:0046777	protein autophosphorylation	0	3	0	0.583041	1	1	1
biological_process	GO:0009847	spore germination	0	1	0	0.835458	1	1	1
biological_process	GO:0032974	amino acid transmembrane export from vacuole	0	1	0	0.835458	1	1	1
molecular_function	GO:0046556	alpha-L-arabinofuranosidase activity	0	9	0	0.201978	1	1	1
biological_process	GO:0046373	L-arabinose metabolic process	0	9	0	0.197891	1	1	1
cellular_component	GO:0000421	autophagosome membrane	0	1	0	0.703536	1	1	1
cellular_component	GO:0031410	cytoplasmic vesicle	0	2	0	0.953857	0.078189	1	1
cellular_component	GO:0031314	extrinsic component of mitochondrial inner membrane	0	10	0	0.172064	1	1	1
biological_process	GO:0006744	ubiquinone biosynthetic process	0	10	0	0.137976	1	1	1
biological_process	GO:0051403	stress-activated MAPK cascade	0	2	0	0.611256	0.763026	1	1
cellular_component	GO:0000931	gamma-tubulin large complex	0	1	0	0.838788	1	1	1
biological_process	GO:0033566	gamma-tubulin complex localization	0	1	0	0.835458	1	1	1
molecular_function	GO:0070300	phosphatidic acid binding	0	2	0	0.701025	1	1	1
molecular_function	GO:0032266	phosphatidylinositol-3-phosphate binding	0	4	0	0.491365	1	1	1
biological_process	GO:0070196	eukaryotic translation initiation factor 3 complex assembly	0	1	0	0.835458	1	1	1
biological_process	GO:0032436	positive regulation of proteasomal ubiquitin-dependent protein catabolic process	0	3	0	0.583041	1	1	1
molecular_function	GO:0003868	4-hydroxyphenylpyruvate dioxygenase activity	0	1	0	0.837288	1	1	1
biological_process	GO:0006559	L-phenylalanine catabolic process	0	6	0	0.339762	1	1	1
biological_process	GO:0006572	tyrosine catabolic process	0	3	0	0.583041	1	1	1
molecular_function	GO:0097177	mitochondrial ribosome binding	0	1	0	0.837288	1	1	1
biological_process	GO:0061587	transfer RNA gene-mediated silencing	0	1	0	0.835458	1	1	1
biological_process	GO:0006172	ADP biosynthetic process	0	2	0	0.69795	1	1	1
biological_process	GO:0046033	AMP metabolic process	0	2	0	0.339762	1	1	1
biological_process	GO:0046034	ATP metabolic process	0	2	0	0.0020927	0.999799	0.213	1
molecular_function	GO:0030552	cAMP binding	0	1	0	0.837288	1	1	1
molecular_function	GO:0008603	cAMP-dependent protein kinase regulator activity	0	1	0	0.837288	1	1	1
biological_process	GO:0001932	regulation of protein phosphorylation	0	1	0	0.776012	0.458907	1	1
cellular_component	GO:0070693	P-TEFb-cap methyltransferase complex	0	1	0	0.838788	1	1	1
molecular_function	GO:0004482	mRNA (guanine-N7-)-methyltransferase activity	0	1	0	0.837288	1	1	1
molecular_function	GO:0008824	cyanate hydratase activity	0	1	0	0.837288	1	1	1
biological_process	GO:0009439	cyanate metabolic process	0	1	0	0.835458	1	1	1
cellular_component	GO:0009331	glycerol-3-phosphate dehydrogenase complex	0	3	0	0.590067	1	1	1
molecular_function	GO:0004367	glycerol-3-phosphate dehydrogenase [NAD+] activity	0	2	0	0.701025	1	1	1
biological_process	GO:0046168	glycerol-3-phosphate catabolic process	0	3	0	0.583041	1	1	1
molecular_function	GO:0070180	large ribosomal subunit rRNA binding	0	4	0	0.491365	1	1	1
molecular_function	GO:0033677	DNA/RNA helicase activity	0	1	0	0.873573	0.508635	1	1
molecular_function	GO:0000334	3-hydroxyanthranilate 3,4-dioxygenase activity	0	1	0	0.837288	1	1	1
molecular_function	GO:0008198	ferrous iron binding	0	5	0	0.411354	1	1	1
molecular_function	GO:0004130	cytochrome-c peroxidase activity	0	1	0	0.837288	1	1	1
biological_process	GO:0000076	DNA replication checkpoint signaling	0	1	0	0.406794	1	1	1
cellular_component	GO:0071006	U2-type catalytic step 1 spliceosome	0	2	0	0.703536	1	1	1
biological_process	GO:0000354	cis assembly of pre-catalytic spliceosome	0	1	0	0.835458	1	1	1
biological_process	GO:0030968	endoplasmic reticulum unfolded protein response	0	4	0	0.907393	0.324223	1	1
biological_process	GO:0071816	tail-anchored membrane protein insertion into ER membrane	0	1	0	0.835458	1	1	1
molecular_function	GO:0005093	Rab GDP-dissociation inhibitor activity	0	1	0	0.837288	1	1	1
cellular_component	GO:0009514	glyoxysome	0	1	0	0.838788	1	1	1
molecular_function	GO:0004451	isocitrate lyase activity	0	2	0	0.701025	1	1	1
molecular_function	GO:0046421	methylisocitrate lyase activity	0	2	0	0.701025	1	1	1
biological_process	GO:0019722	calcium-mediated signaling	0	2	0	0.741953	0.660238	1	1
molecular_function	GO:0004358	glutamate N-acetyltransferase activity	0	1	0	0.837288	1	1	1
cellular_component	GO:0045009	chitosome	0	1	0	0.838788	1	1	1
biological_process	GO:0030476	ascospore wall assembly	0	3	0	0.583041	1	1	1
biological_process	GO:0034221	fungal-type cell wall chitin biosynthetic process	0	1	0	0.835458	1	1	1
biological_process	GO:0097271	protein localization to bud neck	0	1	0	0.835458	1	1	1
molecular_function	GO:0008236	serine-type peptidase activity	0	15	0	0.571254	0.559906	1	1
molecular_function	GO:0016846	carbon-sulfur lyase activity	0	8	0	0.350183	0.900885	1	1
molecular_function	GO:0004056	argininosuccinate lyase activity	0	1	0	0.837288	1	1	1
biological_process	GO:0042450	arginine biosynthetic process via ornithine	0	3	0	0.583041	1	1	1
molecular_function	GO:0016653	oxidoreductase activity, acting on NAD(P)H, heme protein as acceptor	0	2	0	0.705077	0.539119	1	1
biological_process	GO:0006784	heme A biosynthetic process	0	2	0	0.69795	1	1	1
molecular_function	GO:0017176	phosphatidylinositol N-acetylglucosaminyltransferase activity	0	3	0	0.586917	1	1	1
biological_process	GO:1902979	mitotic DNA replication termination	0	1	0	0.835458	1	1	1
molecular_function	GO:0003878	ATP citrate synthase activity	0	2	0	0.701025	1	1	1
cellular_component	GO:0030126	COPI vesicle coat	0	6	0	0.348046	1	1	1
biological_process	GO:0009116	nucleoside metabolic process	0	29	0	0.0012433	1	0.139	1
cellular_component	GO:0016272	prefoldin complex	0	6	0	0.348046	1	1	1
molecular_function	GO:0016628	oxidoreductase activity, acting on the CH-CH group of donors, NAD or NADP as acceptor	0	5	0	0.0580895	1	1	1
biological_process	GO:0006414	translational elongation	0	1	0	0.576778	0.662877	1	1
molecular_function	GO:0004144	diacylglycerol O-acyltransferase activity	0	2	0	0.701025	1	1	1
biological_process	GO:0006071	glycerol metabolic process	0	1	0	0.807938	0.593206	1	1
biological_process	GO:0019432	triglyceride biosynthetic process	0	3	0	0.583041	1	1	1
molecular_function	GO:0015293	symporter activity	0	7	0	0.617024	0.758701	1	1
cellular_component	GO:0033597	mitotic checkpoint complex	0	1	0	0.838788	1	1	1
cellular_component	GO:1990498	mitotic spindle microtubule	0	1	0	0.838788	1	1	1
cellular_component	GO:0044732	mitotic spindle pole body	0	5	0	0.560934	0.794787	1	1
biological_process	GO:1905318	meiosis I spindle assembly checkpoint signaling	0	1	0	0.835458	1	1	1
biological_process	GO:0009306	protein secretion	0	1	0	0.69795	1	1	1
cellular_component	GO:0000813	ESCRT I complex	0	2	0	0.703536	1	1	1
molecular_function	GO:0044877	protein-containing complex binding	0	4	0	0.652683	0.471352	1	1
biological_process	GO:0043162	ubiquitin-dependent protein catabolic process via the multivesicular body sorting pathway	0	2	0	0.339762	1	1	1
molecular_function	GO:0052692	raffinose alpha-galactosidase activity	0	7	0	0.288264	1	1	1
molecular_function	GO:0003755	peptidyl-prolyl cis-trans isomerase activity	0	17	0	0.0486093	1	0.994	1
cellular_component	GO:0031515	tRNA (m1A) methyltransferase complex	0	3	0	0.590067	1	1	1
biological_process	GO:0030488	tRNA methylation	0	3	0	0.283759	1	1	1
molecular_function	GO:0004343	glucosamine 6-phosphate N-acetyltransferase activity	0	3	0	0.586917	1	1	1
biological_process	GO:0006048	UDP-N-acetylglucosamine biosynthetic process	0	5	0	0.406794	1	1	1
cellular_component	GO:0000439	transcription factor TFIIH core complex	0	7	0	0.291862	1	1	1
molecular_function	GO:0004364	glutathione transferase activity	0	5	0	0.411354	1	1	1
molecular_function	GO:0003917	DNA topoisomerase type I (single strand cut, ATP-independent) activity	0	2	0	0.701025	1	1	1
molecular_function	GO:0004354	glutamate dehydrogenase (NADP+) activity	0	1	0	0.837288	1	1	1
molecular_function	GO:0015267	channel activity	0	6	0	0.485126	0.695123	1	1
cellular_component	GO:0031390	Ctf18 RFC-like complex	0	4	0	0.494878	1	1	1
cellular_component	GO:0031021	interphase microtubule organizing center	0	2	0	0.703536	1	1	1
cellular_component	GO:0061499	outer plaque of mitotic spindle pole body	0	1	0	0.838788	1	1	1
biological_process	GO:0051256	mitotic spindle midzone assembly	0	1	0	0.835458	1	1	1
biological_process	GO:0032220	plasma membrane fusion involved in cytogamy	0	5	0	0.406794	1	1	1
molecular_function	GO:0140078	class I DNA-(apurinic or apyrimidinic site) endonuclease activity	0	3	0	0.586917	1	1	1
molecular_function	GO:0019104	DNA N-glycosylase activity	0	1	0	0.344359	1	1	1
molecular_function	GO:0015099	nickel cation transmembrane transporter activity	0	2	0	0.701025	1	1	1
molecular_function	GO:0016620	oxidoreductase activity, acting on the aldehyde or oxo group of donors, NAD or NADP as acceptor	0	17	0	0.160644	0.948731	1	1
molecular_function	GO:0003847	1-alkyl-2-acetylglycerophosphocholine esterase activity	0	2	0	0.701025	1	1	1
molecular_function	GO:0016747	acyltransferase activity, transferring groups other than amino-acyl groups	0	22	0	0.259964	0.816108	1	1
cellular_component	GO:0005950	anthranilate synthase complex	0	1	0	0.838788	1	1	1
molecular_function	GO:0004049	anthranilate synthase activity	0	2	0	0.701025	1	1	1
biological_process	GO:0000162	tryptophan biosynthetic process	0	3	0	0.583041	1	1	1
molecular_function	GO:0004043	L-aminoadipate-semialdehyde dehydrogenase activity	0	1	0	0.837288	1	1	1
cellular_component	GO:1902494	catalytic complex	0	2	0	0.717195	0.338893	1	1
biological_process	GO:0034470	ncRNA processing	0	2	0	0.000668933	0.999716	0.079	1
molecular_function	GO:0015204	urea transmembrane transporter activity	0	2	0	0.701025	1	1	1
cellular_component	GO:0098826	endoplasmic reticulum tubular network membrane	0	1	0	0.838788	1	1	1
biological_process	GO:0071788	endoplasmic reticulum tubular network maintenance	0	1	0	0.835458	1	1	1
biological_process	GO:1903373	positive regulation of endoplasmic reticulum tubular network organization	0	1	0	0.835458	1	1	1
molecular_function	GO:0004356	glutamate-ammonia ligase activity	0	3	0	0.586917	1	1	1
biological_process	GO:0006542	glutamine biosynthetic process	0	3	0	0.583041	1	1	1
cellular_component	GO:0015934	large ribosomal subunit	0	8	0	0.00421303	1	0.174	1
biological_process	GO:0071409	cellular response to cycloheximide	0	1	0	0.835458	1	1	1
biological_process	GO:0036003	positive regulation of transcription from RNA polymerase II promoter in response to stress	0	1	0	0.583041	1	1	1
biological_process	GO:0006452	translational frameshifting	0	2	0	0.583041	1	1	1
molecular_function	GO:0004060	arylamine N-acetyltransferase activity	0	2	0	0.701025	1	1	1
molecular_function	GO:0016209	antioxidant activity	0	1	0	0.427233	0.742382	1	1
biological_process	GO:0006139	nucleobase-containing compound metabolic process	0	9	0	0.997335	0.00359289	1	0.725
cellular_component	GO:0017054	negative cofactor 2 complex	0	1	0	0.838788	1	1	1
molecular_function	GO:0001046	core promoter sequence-specific DNA binding	0	1	0	0.411354	1	1	1
molecular_function	GO:0140223	general transcription initiation factor activity	0	1	0	0.811408	0.588646	1	1
biological_process	GO:0017055	negative regulation of RNA polymerase II transcription preinitiation complex assembly	0	1	0	0.835458	1	1	1
biological_process	GO:0016480	negative regulation of transcription by RNA polymerase III	0	2	0	0.69795	1	1	1
biological_process	GO:0061408	positive regulation of transcription from RNA polymerase II promoter in response to heat stress	0	1	0	0.835458	1	1	1
molecular_function	GO:0019843	rRNA binding	0	13	0	0.0139516	1	0.667	1
biological_process	GO:0007531	mating type determination	0	1	0	0.807938	0.593206	1	1
molecular_function	GO:0003854	3-beta-hydroxy-delta5-steroid dehydrogenase activity	0	4	0	0.491365	1	1	1
biological_process	GO:0006694	steroid biosynthetic process	0	4	0	0.0189055	1	0.91	1
molecular_function	GO:0005324	long-chain fatty acid transporter activity	0	2	0	0.701025	1	1	1
molecular_function	GO:0004467	long-chain fatty acid-CoA ligase activity	0	2	0	0.701025	1	1	1
molecular_function	GO:0000009	alpha-1,6-mannosyltransferase activity	0	7	0	0.617024	0.758701	1	1
biological_process	GO:1901135	carbohydrate derivative metabolic process	0	10	0	5.138e-05	0.999979	0.004	1
molecular_function	GO:0033961	cis-stilbene-oxide hydrolase activity	0	4	0	0.491365	1	1	1
molecular_function	GO:0008865	fructokinase activity	0	1	0	0.837288	1	1	1
molecular_function	GO:0004340	glucokinase activity	0	2	0	0.701025	1	1	1
molecular_function	GO:0005536	glucose binding	0	4	0	0.491365	1	1	1
molecular_function	GO:0019158	mannokinase activity	0	1	0	0.837288	1	1	1
biological_process	GO:0001678	cellular glucose homeostasis	0	4	0	0.491711	0.834755	1	1
biological_process	GO:0006002	fructose 6-phosphate metabolic process	0	2	0	0.69795	1	1	1
biological_process	GO:0019660	glycolytic fermentation	0	1	0	0.835458	1	1	1
biological_process	GO:0006096	glycolytic process	0	14	0	0.0559511	1	1	1
biological_process	GO:0008608	attachment of spindle microtubules to kinetochore	0	7	0	0.343458	0.903821	1	1
biological_process	GO:0009060	aerobic respiration	0	4	0	0.226046	0.884815	1	1
molecular_function	GO:0050291	sphingosine N-acyltransferase activity	0	2	0	0.701025	1	1	1
biological_process	GO:0046513	ceramide biosynthetic process	0	2	0	0.69795	1	1	1
biological_process	GO:0070485	dehydro-D-arabinono-1,4-lactone biosynthetic process	0	2	0	0.69795	1	1	1
biological_process	GO:0018023	peptidyl-lysine trimethylation	0	2	0	0.69795	1	1	1
biological_process	GO:0006637	acyl-CoA metabolic process	0	3	0	0.373072	0.844968	1	1
molecular_function	GO:0016857	racemase and epimerase activity, acting on carbohydrates and derivatives	0	1	0	0.491365	1	1	1
molecular_function	GO:0015095	magnesium ion transmembrane transporter activity	0	7	0	0.288264	1	1	1
molecular_function	GO:0016531	copper chaperone activity	0	2	0	0.701025	1	1	1
biological_process	GO:0008535	respiratory chain complex IV assembly	0	1	0	0.197891	1	1	1
molecular_function	GO:0004169	dolichyl-phosphate-mannose-protein mannosyltransferase activity	0	3	0	0.586917	1	1	1
molecular_function	GO:0004650	polygalacturonase activity	0	4	0	0.491365	1	1	1
biological_process	GO:0071555	cell wall organization	0	14	0	0.0732372	0.980521	1	1
biological_process	GO:0009437	carnitine metabolic process	0	1	0	0.69795	1	1	1
molecular_function	GO:0008379	thioredoxin peroxidase activity	0	3	0	0.586917	1	1	1
biological_process	GO:0045454	cell redox homeostasis	0	5	0	0.406794	1	1	1
molecular_function	GO:0004375	glycine dehydrogenase (decarboxylating) activity	0	2	0	0.701025	1	1	1
biological_process	GO:0006546	glycine catabolic process	0	2	0	0.583041	1	1	1
biological_process	GO:0006850	mitochondrial pyruvate transmembrane transport	0	3	0	0.583041	1	1	1
cellular_component	GO:0031083	BLOC-1 complex	0	2	0	0.703536	1	1	1
molecular_function	GO:0102098	D-galacturonate reductase activity	0	1	0	0.837288	1	1	1
biological_process	GO:0019698	D-galacturonate catabolic process	0	1	0	0.835458	1	1	1
cellular_component	GO:0045263	proton-transporting ATP synthase complex, coupling factor F(o)	0	3	0	0.790462	0.496448	1	1
biological_process	GO:0015986	ATP synthesis coupled proton transport	0	7	0	0.549637	0.802109	1	1
cellular_component	GO:0005801	cis-Golgi network	0	4	0	0.494878	1	1	1
biological_process	GO:0090083	regulation of inclusion body assembly	0	1	0	0.835458	1	1	1
molecular_function	GO:0047657	alpha-1,3-glucan synthase activity	0	1	0	0.837288	1	1	1
molecular_function	GO:0050483	IMP 5'-nucleotidase activity	0	1	0	0.837288	1	1	1
biological_process	GO:0006190	inosine salvage	0	1	0	0.835458	1	1	1
molecular_function	GO:0004807	triose-phosphate isomerase activity	0	2	0	0.701025	1	1	1
biological_process	GO:0042779	tRNA 3'-trailer cleavage	0	1	0	0.835458	1	1	1
cellular_component	GO:1990143	CoA-synthesizing protein complex	0	1	0	0.838788	1	1	1
molecular_function	GO:0004632	phosphopantothenate--cysteine ligase activity	0	1	0	0.837288	1	1	1
biological_process	GO:1990181	acetyl-CoA biosynthetic process from pantothenate	0	1	0	0.835458	1	1	1
biological_process	GO:0015937	coenzyme A biosynthetic process	0	3	0	0.583041	1	1	1
molecular_function	GO:0004462	lactoylglutathione lyase activity	0	2	0	0.701025	1	1	1
biological_process	GO:0006120	mitochondrial electron transport, NADH to ubiquinone	0	2	0	0.69795	1	1	1
molecular_function	GO:0050661	NADP binding	0	29	0	0.00571396	1	0.341	1
molecular_function	GO:0003959	NADPH dehydrogenase activity	0	2	0	0.701025	1	1	1
biological_process	GO:0006696	ergosterol biosynthetic process	0	8	0	0.197891	1	1	1
molecular_function	GO:0046899	nucleoside triphosphate adenylate kinase activity	0	1	0	0.837288	1	1	1
biological_process	GO:0046039	GTP metabolic process	0	1	0	0.69795	1	1	1
biological_process	GO:0046041	ITP metabolic process	0	1	0	0.835458	1	1	1
molecular_function	GO:0016780	phosphotransferase activity, for other substituted phosphate groups	0	4	0	0.0991147	1	1	1
cellular_component	GO:0016442	RISC complex	0	1	0	0.838788	1	1	1
cellular_component	GO:0000178	exosome (RNase complex)	0	1	0	0.450067	0.855736	1	1
molecular_function	GO:0008897	holo-[acyl-carrier-protein] synthase activity	0	3	0	0.586917	1	1	1
molecular_function	GO:0016992	lipoate synthase activity	0	1	0	0.837288	1	1	1
molecular_function	GO:0102552	lipoyl synthase activity (acting on glycine-cleavage complex H protein	0	1	0	0.837288	1	1	1
molecular_function	GO:0102553	lipoyl synthase activity (acting on pyruvate dehydrogenase E2 protein)	0	1	0	0.837288	1	1	1
biological_process	GO:0009249	protein lipoylation	0	3	0	0.583041	1	1	1
molecular_function	GO:0004351	glutamate decarboxylase activity	0	2	0	0.701025	1	1	1
biological_process	GO:0006536	glutamate metabolic process	0	3	0	0.283759	1	1	1
biological_process	GO:0018279	protein N-linked glycosylation via asparagine	0	1	0	0.835458	1	1	1
molecular_function	GO:0008441	3'(2'),5'-bisphosphate nucleotidase activity	0	1	0	0.837288	1	1	1
molecular_function	GO:0052829	inositol-1,3,4-trisphosphate 1-phosphatase activity	0	1	0	0.837288	1	1	1
molecular_function	GO:0004441	inositol-1,4-bisphosphate 1-phosphatase activity	0	1	0	0.837288	1	1	1
biological_process	GO:0042538	hyperosmotic salinity response	0	1	0	0.835458	1	1	1
biological_process	GO:0046855	inositol phosphate dephosphorylation	0	4	0	0.487023	1	1	1
biological_process	GO:0009086	methionine biosynthetic process	0	9	0	0.203938	0.953298	1	1
biological_process	GO:0046854	phosphatidylinositol phosphate biosynthetic process	0	3	0	0.583041	1	1	1
cellular_component	GO:0005762	mitochondrial large ribosomal subunit	0	11	0	0.144264	1	1	1
cellular_component	GO:0008250	oligosaccharyltransferase complex	0	3	0	0.590067	1	1	1
biological_process	GO:0006487	protein N-linked glycosylation	0	5	0	0.776012	0.458907	1	1
molecular_function	GO:0004822	isoleucine-tRNA ligase activity	0	3	0	0.586917	1	1	1
biological_process	GO:0006418	tRNA aminoacylation for protein translation	0	3	0	0.247706	0.880567	1	1
biological_process	GO:0007076	mitotic chromosome condensation	0	4	0	0.339762	1	1	1
biological_process	GO:0007097	nuclear migration	0	1	0	0.406794	1	1	1
biological_process	GO:0000019	regulation of mitotic recombination	0	2	0	0.487023	1	1	1
biological_process	GO:0009303	rRNA transcription	0	1	0	0.685062	0.611494	1	1
molecular_function	GO:0010484	H3 histone acetyltransferase activity	0	1	0	0.97355	0.298975	1	1
biological_process	GO:0043618	regulation of transcription from RNA polymerase II promoter in response to stress	0	2	0	0.339762	1	1	1
molecular_function	GO:0000246	delta24(24-1) sterol reductase activity	0	1	0	0.837288	1	1	1
biological_process	GO:0061163	endoplasmic reticulum polarization	0	2	0	0.69795	1	1	1
biological_process	GO:0051306	mitotic sister chromatid separation	0	1	0	0.964643	0.108135	1	1
biological_process	GO:0035103	sterol regulatory element binding protein cleavage	0	2	0	0.69795	1	1	1
molecular_function	GO:0004499	N,N-dimethylaniline monooxygenase activity	0	14	0	0.0829482	1	1	1
molecular_function	GO:0045174	glutathione dehydrogenase (ascorbate) activity	0	1	0	0.837288	1	1	1
molecular_function	GO:0008519	ammonium transmembrane transporter activity	0	4	0	0.491365	1	1	1
cellular_component	GO:0043226	organelle	0	1	0	1	2.2172e-09	1	0
molecular_function	GO:0003987	acetate-CoA ligase activity	0	2	0	0.701025	1	1	1
biological_process	GO:0019427	acetyl-CoA biosynthetic process from acetate	0	2	0	0.69795	1	1	1
cellular_component	GO:0005664	nuclear origin of replication recognition complex	0	3	0	0.590067	1	1	1
biological_process	GO:1902969	mitotic DNA replication	0	3	0	0.812971	0.411923	1	1
biological_process	GO:0033314	mitotic DNA replication checkpoint signaling	0	4	0	0.487023	1	1	1
biological_process	GO:0101030	tRNA-guanine transglycosylation	0	3	0	0.583041	1	1	1
cellular_component	GO:0030688	preribosome, small subunit precursor	0	10	0	0.144264	1	1	1
molecular_function	GO:0004853	uroporphyrinogen decarboxylase activity	0	1	0	0.837288	1	1	1
biological_process	GO:0006782	protoporphyrinogen IX biosynthetic process	0	7	0	0.283759	1	1	1
cellular_component	GO:0030134	COPII-coated ER to Golgi transport vesicle	0	6	0	0.920444	0.212941	1	1
molecular_function	GO:0097020	COPII receptor activity	0	1	0	0.837288	1	1	1
biological_process	GO:0031505	fungal-type cell wall organization	0	10	0	0.177984	0.961021	1	1
biological_process	GO:0006857	oligopeptide transport	0	4	0	0.741953	0.660238	1	1
biological_process	GO:0016575	histone deacetylation	0	4	0	0.406794	1	1	1
molecular_function	GO:0000309	nicotinamide-nucleotide adenylyltransferase activity	0	2	0	0.701025	1	1	1
biological_process	GO:0009435	NAD biosynthetic process	0	5	0	0.165245	1	1	1
biological_process	GO:0051260	protein homooligomerization	0	4	0	0.487023	1	1	1
biological_process	GO:1903259	exon-exon junction complex disassembly	0	1	0	0.835458	1	1	1
biological_process	GO:0070682	proteasome regulatory particle assembly	0	9	0	0.197891	1	1	1
biological_process	GO:0043386	mycotoxin biosynthetic process	0	14	0	0.0670282	1	1	1
biological_process	GO:0009166	nucleotide catabolic process	0	3	0	0.339762	1	1	1
cellular_component	GO:0030132	clathrin coat of coated pit	0	2	0	0.415027	1	1	1
cellular_component	GO:0030130	clathrin coat of trans-Golgi network vesicle	0	2	0	0.814282	0.584973	1	1
cellular_component	GO:0071439	clathrin complex	0	1	0	0.838788	1	1	1
molecular_function	GO:0032051	clathrin light chain binding	0	1	0	0.837288	1	1	1
molecular_function	GO:0070181	small ribosomal subunit rRNA binding	0	2	0	0.701025	1	1	1
biological_process	GO:0045903	positive regulation of translational fidelity	0	2	0	0.69795	1	1	1
biological_process	GO:0006407	rRNA export from nucleus	0	4	0	0.487023	1	1	1
biological_process	GO:0006038	cell wall chitin biosynthetic process	0	1	0	0.69795	1	1	1
biological_process	GO:0051382	kinetochore assembly	0	5	0	0.339762	1	1	1
molecular_function	GO:0016627	oxidoreductase activity, acting on the CH-CH group of donors	0	9	0	0.197208	0.909773	1	1
molecular_function	GO:0004378	GDP-Man:Man1GlcNAc2-PP-Dol alpha-1,3-mannosyltransferase activity	0	1	0	0.837288	1	1	1
molecular_function	GO:0102704	GDP-Man:Man2GlcNAc2-PP-dolichol alpha-1,6-mannosyltransferase activity	0	1	0	0.837288	1	1	1
cellular_component	GO:0042729	DASH complex	0	9	0	0.205213	1	1	1
cellular_component	GO:0072686	mitotic spindle	0	8	0	0.277457	0.928741	1	1
cellular_component	GO:0005750	mitochondrial respiratory chain complex III	0	7	0	0.291862	1	1	1
molecular_function	GO:0008121	ubiquinol-cytochrome-c reductase activity	0	3	0	0.586917	1	1	1
biological_process	GO:0006122	mitochondrial electron transport, ubiquinol to cytochrome c	0	8	0	0.236974	1	1	1
biological_process	GO:0070899	mitochondrial tRNA wobble uridine modification	0	1	0	0.835458	1	1	1
molecular_function	GO:0004326	tetrahydrofolylpolyglutamate synthase activity	0	4	0	0.491365	1	1	1
biological_process	GO:0006730	one-carbon metabolic process	0	12	0	0.0467019	1	0.997	1
molecular_function	GO:0019787	ubiquitin-like protein transferase activity	0	1	0	0.896914	0.192012	1	1
molecular_function	GO:0004821	histidine-tRNA ligase activity	0	1	0	0.837288	1	1	1
biological_process	GO:0006427	histidyl-tRNA aminoacylation	0	1	0	0.835458	1	1	1
molecular_function	GO:0004476	mannose-6-phosphate isomerase activity	0	1	0	0.837288	1	1	1
biological_process	GO:0000032	cell wall mannoprotein biosynthetic process	0	2	0	0.69795	1	1	1
biological_process	GO:0009298	GDP-mannose biosynthetic process	0	8	0	0.236974	1	1	1
molecular_function	GO:0004365	glyceraldehyde-3-phosphate dehydrogenase (NAD+) (phosphorylating) activity	0	1	0	0.837288	1	1	1
biological_process	GO:0006006	glucose metabolic process	0	3	0	0.777431	0.423222	1	1
molecular_function	GO:0016429	tRNA (adenine-N1-)-methyltransferase activity	0	2	0	0.701025	1	1	1
molecular_function	GO:0019120	hydrolase activity, acting on acid halide bonds, in C-halide compounds	0	2	0	0.701025	1	1	1
biological_process	GO:0006896	Golgi to vacuole transport	0	4	0	0.487023	1	1	1
molecular_function	GO:0090560	2-(3-amino-3-carboxypropyl)histidine synthase activity	0	2	0	0.701025	1	1	1
biological_process	GO:0017183	peptidyl-diphthamide biosynthetic process from peptidyl-histidine	0	5	0	0.406794	1	1	1
cellular_component	GO:0031207	Sec62/Sec63 complex	0	1	0	0.838788	1	1	1
molecular_function	GO:0004609	phosphatidylserine decarboxylase activity	0	2	0	0.701025	1	1	1
biological_process	GO:0006646	phosphatidylethanolamine biosynthetic process	0	4	0	0.487023	1	1	1
biological_process	GO:0010636	positive regulation of mitochondrial fusion	0	1	0	0.835458	1	1	1
biological_process	GO:0010954	positive regulation of protein processing	0	1	0	0.835458	1	1	1
biological_process	GO:0009268	response to pH	0	1	0	0.927767	0.416959	1	1
molecular_function	GO:0004659	prenyltransferase activity	0	3	0	0.239315	0.94191	1	1
biological_process	GO:0009820	alkaloid metabolic process	0	3	0	0.583041	1	1	1
biological_process	GO:0044249	cellular biosynthetic process	0	7	0	0.328016	0.707041	1	1
biological_process	GO:1901576	organic substance biosynthetic process	0	3	0	0.306318	0.727518	1	1
biological_process	GO:0006865	amino acid transport	0	19	0	0.0758745	0.986838	1	1
molecular_function	GO:0005315	inorganic phosphate transmembrane transporter activity	0	9	0	0.201978	1	1	1
biological_process	GO:0006817	phosphate ion transport	0	6	0	0.165245	1	1	1
molecular_function	GO:0070290	N-acylphosphatidylethanolamine-specific phospholipase D activity	0	4	0	0.491365	1	1	1
molecular_function	GO:0004630	phospholipase D activity	0	3	0	0.586917	1	1	1
biological_process	GO:0048017	inositol lipid-mediated signaling	0	3	0	0.675777	0.716241	1	1
biological_process	GO:0006654	phosphatidic acid biosynthetic process	0	2	0	0.69795	1	1	1
molecular_function	GO:0004022	alcohol dehydrogenase (NAD+) activity	0	2	0	0.701025	1	1	1
molecular_function	GO:0047988	hydroxyacid-oxoacid transhydrogenase activity	0	1	0	0.837288	1	1	1
biological_process	GO:0061817	endoplasmic reticulum-plasma membrane tethering	0	3	0	0.583041	1	1	1
molecular_function	GO:0004812	aminoacyl-tRNA ligase activity	0	4	0	0.215979	0.899075	1	1
cellular_component	GO:0030690	Noc1p-Noc2p complex	0	2	0	0.703536	1	1	1
cellular_component	GO:0030691	Noc2p-Noc3p complex	0	1	0	0.838788	1	1	1
biological_process	GO:0042255	ribosome assembly	0	3	0	0.117015	0.977344	1	1
molecular_function	GO:0050614	delta24-sterol reductase activity	0	3	0	0.586917	1	1	1
molecular_function	GO:0051087	chaperone binding	0	10	0	0.169058	1	1	1
molecular_function	GO:0008496	mannan endo-1,6-alpha-mannosidase activity	0	6	0	0.344359	1	1	1
biological_process	GO:0016052	carbohydrate catabolic process	0	9	0	0.0127316	0.993887	0.802	1
molecular_function	GO:0004345	glucose-6-phosphate dehydrogenase activity	0	1	0	0.837288	1	1	1
biological_process	GO:0006098	pentose-phosphate shunt	0	4	0	0.339762	1	1	1
biological_process	GO:0030866	cortical actin cytoskeleton organization	0	2	0	0.411572	0.822016	1	1
molecular_function	GO:0000175	3'-5'-exoribonuclease activity	0	3	0	0.288264	1	1	1
biological_process	GO:0000467	exonucleolytic trimming to generate mature 3'-end of 5.8S rRNA from tricistronic rRNA transcript (SSU-rRNA, 5.8S rRNA, LSU-rRNA)	0	7	0	0.283759	1	1	1
cellular_component	GO:0005948	acetolactate synthase complex	0	2	0	0.703536	1	1	1
molecular_function	GO:0003984	acetolactate synthase activity	0	3	0	0.586917	1	1	1
molecular_function	GO:1990610	acetolactate synthase regulator activity	0	1	0	0.837288	1	1	1
molecular_function	GO:0004845	uracil phosphoribosyltransferase activity	0	1	0	0.837288	1	1	1
biological_process	GO:0008655	pyrimidine-containing compound salvage	0	2	0	0.583041	1	1	1
biological_process	GO:0006334	nucleosome assembly	0	6	0	0.933288	0.218659	1	1
biological_process	GO:0006337	nucleosome disassembly	0	2	0	0.69795	1	1	1
cellular_component	GO:0016514	SWI/SNF complex	0	2	0	0.703536	1	1	1
cellular_component	GO:0005674	transcription factor TFIIF complex	0	2	0	0.703536	1	1	1
cellular_component	GO:0030907	MBF transcription complex	0	1	0	0.838788	1	1	1
molecular_function	GO:0004602	glutathione peroxidase activity	0	2	0	0.701025	1	1	1
biological_process	GO:0061692	cellular detoxification of hydrogen peroxide	0	1	0	0.835458	1	1	1
molecular_function	GO:0004411	homogentisate 1,2-dioxygenase activity	0	2	0	0.701025	1	1	1
biological_process	GO:0006570	tyrosine metabolic process	0	2	0	0.283759	1	1	1
biological_process	GO:0007249	I-kappaB kinase/NF-kappaB signaling	0	1	0	0.835458	1	1	1
biological_process	GO:0006491	N-glycan processing	0	1	0	0.835458	1	1	1
molecular_function	GO:0004057	arginyltransferase activity	0	1	0	0.837288	1	1	1
molecular_function	GO:0042577	lipid phosphatase activity	0	5	0	0.411354	1	1	1
biological_process	GO:0006644	phospholipid metabolic process	0	8	0	0.412957	0.702282	1	1
molecular_function	GO:0019903	protein phosphatase binding	0	1	0	0.837288	1	1	1
biological_process	GO:0043666	regulation of phosphoprotein phosphatase activity	0	3	0	0.871096	0.512977	1	1
cellular_component	GO:0009341	beta-galactosidase complex	0	3	0	0.590067	1	1	1
molecular_function	GO:0004565	beta-galactosidase activity	0	3	0	0.586917	1	1	1
cellular_component	GO:0045239	tricarboxylic acid cycle enzyme complex	0	1	0	0.590067	1	1	1
molecular_function	GO:0004333	fumarate hydratase activity	0	1	0	0.837288	1	1	1
biological_process	GO:0017000	antibiotic biosynthetic process	0	2	0	0.69795	1	1	1
biological_process	GO:0008152	metabolic process	0	10	0	0.000279531	0.999809	0.027	1
biological_process	GO:0006635	fatty acid beta-oxidation	0	5	0	0.406794	1	1	1
molecular_function	GO:0003725	double-stranded RNA binding	0	2	0	0.701025	1	1	1
molecular_function	GO:0061710	L-threonylcarbamoyladenylate synthase	0	1	0	0.837288	1	1	1
biological_process	GO:0002949	tRNA threonylcarbamoyladenosine modification	0	3	0	0.583041	1	1	1
molecular_function	GO:0004516	nicotinate phosphoribosyltransferase activity	0	1	0	0.837288	1	1	1
molecular_function	GO:0004514	nicotinate-nucleotide diphosphorylase (carboxylating) activity	0	2	0	0.701025	1	1	1
biological_process	GO:0019358	nicotinate nucleotide salvage	0	1	0	0.835458	1	1	1
cellular_component	GO:0035974	meiotic spindle pole body	0	1	0	0.838788	1	1	1
biological_process	GO:1990734	astral microtubule anchoring at mitotic spindle pole body	0	1	0	0.835458	1	1	1
biological_process	GO:0098863	nuclear migration by microtubule mediated pushing forces	0	1	0	0.835458	1	1	1
molecular_function	GO:0004784	superoxide dismutase activity	0	4	0	0.491365	1	1	1
cellular_component	GO:0031227	intrinsic component of endoplasmic reticulum membrane	0	1	0	0.108739	0.979295	1	1
cellular_component	GO:0031901	early endosome membrane	0	2	0	0.703536	1	1	1
biological_process	GO:0019222	regulation of metabolic process	0	1	0	0.999947	9.64646e-05	1	0.034
molecular_function	GO:0004631	phosphomevalonate kinase activity	0	2	0	0.701025	1	1	1
biological_process	GO:0006695	cholesterol biosynthetic process	0	1	0	0.835458	1	1	1
biological_process	GO:0019287	isopentenyl diphosphate biosynthetic process, mevalonate pathway	0	4	0	0.406794	1	1	1
molecular_function	GO:0031151	histone methyltransferase activity (H3-K79 specific)	0	1	0	0.837288	1	1	1
molecular_function	GO:0031493	obsolete nucleosomal histone binding	0	1	0	0.837288	1	1	1
biological_process	GO:0046916	cellular transition metal ion homeostasis	0	9	0	0.346918	0.816596	1	1
biological_process	GO:0051131	chaperone-mediated protein complex assembly	0	4	0	0.487023	1	1	1
biological_process	GO:0042026	protein refolding	0	7	0	0.283759	1	1	1
molecular_function	GO:0004410	homocitrate synthase activity	0	1	0	0.837288	1	1	1
molecular_function	GO:0008079	translation termination factor activity	0	1	0	0.344359	1	1	1
biological_process	GO:0006449	regulation of translational termination	0	2	0	0.583041	1	1	1
biological_process	GO:0042274	ribosomal small subunit biogenesis	0	6	0	0.15549	0.93262	1	1
molecular_function	GO:0008137	NADH dehydrogenase (ubiquinone) activity	0	6	0	0.344359	1	1	1
cellular_component	GO:0000276	mitochondrial proton-transporting ATP synthase complex, coupling factor F(o)	0	4	0	0.9119	0.314852	1	1
molecular_function	GO:0106306	protein serine/threonine phosphatase activity	0	12	0	NA	NA	NA	NA
molecular_function	GO:0106307	protein serine/threonine phosphatase activity	0	12	0	NA	NA	NA	NA
biological_process	GO:0006113	fermentation	0	1	0	0.487023	1	1	1
cellular_component	GO:1902554	serine/threonine protein kinase complex	0	1	0	0.214356	0.949931	1	1
cellular_component	GO:0034973	Sid2-Mob1 complex	0	2	0	0.703536	1	1	1
biological_process	GO:0000281	mitotic cytokinesis	0	2	0	0.903655	0.222569	1	1
biological_process	GO:1903473	positive regulation of mitotic actomyosin contractile ring contraction	0	3	0	0.583041	1	1	1
biological_process	GO:0031031	positive regulation of septation initiation signaling	0	2	0	0.69795	1	1	1
biological_process	GO:0006468	protein phosphorylation	0	1	0	0.535333	0.671266	1	1
molecular_function	GO:0016798	hydrolase activity, acting on glycosyl bonds	0	3	0	0.00661109	0.996478	0.375	1
cellular_component	GO:0008540	proteasome regulatory particle, base subcomplex	0	9	0	0.205213	1	1	1
molecular_function	GO:0004175	endopeptidase activity	0	1	0	0.922687	0.117133	1	1
molecular_function	GO:0008442	3-hydroxyisobutyrate dehydrogenase activity	0	1	0	0.837288	1	1	1
biological_process	GO:0006574	valine catabolic process	0	1	0	0.835458	1	1	1
molecular_function	GO:0004568	chitinase activity	0	17	0	0.0486093	1	0.994	1
biological_process	GO:0006032	chitin catabolic process	0	12	0	0.1152	1	1	1
molecular_function	GO:0035615	clathrin adaptor activity	0	3	0	0.586917	1	1	1
cellular_component	GO:0031304	intrinsic component of mitochondrial inner membrane	0	1	0	0.834536	0.439066	1	1
cellular_component	GO:0030061	mitochondrial crista	0	1	0	0.838788	1	1	1
molecular_function	GO:1901612	cardiolipin binding	0	1	0	0.837288	1	1	1
biological_process	GO:0015886	heme transport	0	3	0	0.583041	1	1	1
biological_process	GO:0008053	mitochondrial fusion	0	1	0	0.69795	1	1	1
biological_process	GO:1990627	mitochondrial inner membrane fusion	0	1	0	0.835458	1	1	1
biological_process	GO:1990626	mitochondrial outer membrane fusion	0	1	0	0.835458	1	1	1
cellular_component	GO:0005673	transcription factor TFIIE complex	0	1	0	0.838788	1	1	1
cellular_component	GO:0043227	membrane-bounded organelle	0	1	0	1	2.1051e-10	1	0
molecular_function	GO:0003925	G protein activity	0	1	0	0.837288	1	1	1
biological_process	GO:0051128	regulation of cellular component organization	0	1	0	0.998658	0.00290466	1	0.606
molecular_function	GO:0004454	ketohexokinase activity	0	1	0	0.837288	1	1	1
biological_process	GO:0006000	fructose metabolic process	0	4	0	0.487023	1	1	1
molecular_function	GO:0004066	asparagine synthase (glutamine-hydrolyzing) activity	0	3	0	0.586917	1	1	1
biological_process	GO:0006529	asparagine biosynthetic process	0	3	0	0.583041	1	1	1
molecular_function	GO:0004089	carbonate dehydratase activity	0	6	0	0.344359	1	1	1
molecular_function	GO:0008534	oxidized purine nucleobase lesion DNA N-glycosylase activity	0	1	0	0.837288	1	1	1
biological_process	GO:0006285	base-excision repair, AP site formation	0	5	0	0.406794	1	1	1
cellular_component	GO:1904564	Nbp35-Cfd1 ATPase complex	0	2	0	0.703536	1	1	1
molecular_function	GO:0018506	maleylacetate reductase activity	0	1	0	0.837288	1	1	1
cellular_component	GO:0000794	condensed nuclear chromosome	0	2	0	0.875634	0.505122	1	1
biological_process	GO:2000002	negative regulation of DNA damage checkpoint	0	1	0	0.835458	1	1	1
biological_process	GO:2001034	positive regulation of double-strand break repair via nonhomologous end joining	0	1	0	0.835458	1	1	1
molecular_function	GO:0071885	N-terminal protein N-methyltransferase activity	0	2	0	0.701025	1	1	1
biological_process	GO:0018013	N-terminal peptidyl-glycine methylation	0	1	0	0.835458	1	1	1
biological_process	GO:0018027	peptidyl-lysine dimethylation	0	2	0	0.69795	1	1	1
biological_process	GO:0010142	farnesyl diphosphate biosynthetic process, mevalonate pathway	0	4	0	0.487023	1	1	1
biological_process	GO:0031388	organic acid phosphorylation	0	2	0	0.69795	1	1	1
molecular_function	GO:0102521	tRNA-4-demethylwyosine synthase activity	0	1	0	0.837288	1	1	1
biological_process	GO:0031591	wybutosine biosynthetic process	0	1	0	0.835458	1	1	1
molecular_function	GO:0035242	protein-arginine omega-N asymmetric methyltransferase activity	0	1	0	0.837288	1	1	1
molecular_function	GO:0035241	protein-arginine omega-N monomethyltransferase activity	0	1	0	0.837288	1	1	1
biological_process	GO:0046656	folic acid biosynthetic process	0	6	0	0.339762	1	1	1
biological_process	GO:0060567	negative regulation of DNA-templated transcription, termination	0	1	0	0.835458	1	1	1
molecular_function	GO:0003730	mRNA 3'-UTR binding	0	1	0	0.97355	0.298975	1	1
molecular_function	GO:0048027	mRNA 5'-UTR binding	0	1	0	0.837288	1	1	1
molecular_function	GO:0004540	ribonuclease activity	0	3	0	0.280539	0.860027	1	1
molecular_function	GO:0000900	translation repressor activity, mRNA regulatory element binding	0	1	0	0.837288	1	1	1
biological_process	GO:0008298	intracellular mRNA localization	0	4	0	0.487023	1	1	1
biological_process	GO:1903450	regulation of G1 to G0 transition	0	1	0	0.835458	1	1	1
molecular_function	GO:0004325	ferrochelatase activity	0	2	0	0.701025	1	1	1
molecular_function	GO:0043115	precorrin-2 dehydrogenase activity	0	1	0	0.837288	1	1	1
cellular_component	GO:0005851	eukaryotic translation initiation factor 2B complex	0	2	0	0.703536	1	1	1
cellular_component	GO:0032045	guanyl-nucleotide exchange factor complex	0	2	0	0.590067	1	1	1
biological_process	GO:1903833	positive regulation of cellular response to amino acid starvation	0	3	0	0.583041	1	1	1
molecular_function	GO:0070191	methionine-R-sulfoxide reductase activity	0	1	0	0.837288	1	1	1
biological_process	GO:0031142	induction of conjugation upon nitrogen starvation	0	2	0	0.69795	1	1	1
molecular_function	GO:0005459	UDP-galactose transmembrane transporter activity	0	2	0	0.701025	1	1	1
biological_process	GO:0097624	UDP-galactose transmembrane import into Golgi lumen	0	1	0	0.835458	1	1	1
cellular_component	GO:0005784	Sec61 translocon complex	0	2	0	0.703536	1	1	1
molecular_function	GO:1904680	peptide transmembrane transporter activity	0	1	0	0.595609	0.690721	1	1
molecular_function	GO:0005048	signal sequence binding	0	1	0	0.935491	0.213681	1	1
biological_process	GO:0070843	misfolded protein transport	0	1	0	0.835458	1	1	1
biological_process	GO:0044743	protein transmembrane import into intracellular organelle	0	1	0	0.955421	0.117052	1	1
biological_process	GO:0006616	SRP-dependent cotranslational protein targeting to membrane, translocation	0	2	0	0.69795	1	1	1
cellular_component	GO:0032156	septin cytoskeleton	0	2	0	0.415027	1	1	1
molecular_function	GO:0004350	glutamate-5-semialdehyde dehydrogenase activity	0	1	0	0.837288	1	1	1
biological_process	GO:0055129	L-proline biosynthetic process	0	3	0	0.583041	1	1	1
biological_process	GO:0044238	primary metabolic process	0	3	0	0.239839	0.78842	1	1
biological_process	GO:0006862	nucleotide transport	0	1	0	0.197891	1	1	1
molecular_function	GO:0004037	allantoicase activity	0	1	0	0.837288	1	1	1
cellular_component	GO:0031310	intrinsic component of vacuolar membrane	0	2	0	0.985311	0.124366	1	1
cellular_component	GO:0033254	vacuolar transporter chaperone complex	0	2	0	0.703536	1	1	1
biological_process	GO:0016237	lysosomal microautophagy	0	3	0	0.236974	1	1	1
biological_process	GO:0006799	polyphosphate biosynthetic process	0	2	0	0.69795	1	1	1
molecular_function	GO:0000170	sphingosine hydroxylase activity	0	1	0	0.837288	1	1	1
biological_process	GO:0008610	lipid biosynthetic process	0	4	0	0.444753	0.645706	1	1
biological_process	GO:0033617	mitochondrial cytochrome c oxidase assembly	0	8	0	0.236974	1	1	1
molecular_function	GO:0015098	molybdate ion transmembrane transporter activity	0	2	0	0.701025	1	1	1
molecular_function	GO:0008660	1-aminocyclopropane-1-carboxylate deaminase activity	0	1	0	0.837288	1	1	1
biological_process	GO:0009310	amine catabolic process	0	1	0	0.685062	0.611494	1	1
molecular_function	GO:0016832	aldehyde-lyase activity	0	1	0	0.344359	1	1	1
cellular_component	GO:0061617	MICOS complex	0	3	0	0.590067	1	1	1
biological_process	GO:0042407	cristae formation	0	3	0	0.583041	1	1	1
molecular_function	GO:0003839	gamma-glutamylcyclotransferase activity	0	4	0	0.491365	1	1	1
molecular_function	GO:0061928	glutathione specific gamma-glutamylcyclotransferase activity	0	1	0	0.837288	1	1	1
molecular_function	GO:0002953	5'-deoxynucleotidase activity	0	1	0	0.837288	1	1	1
cellular_component	GO:0000148	1,3-beta-D-glucan synthase complex	0	1	0	0.838788	1	1	1
molecular_function	GO:0003843	1,3-beta-D-glucan synthase activity	0	1	0	0.837288	1	1	1
biological_process	GO:0006075	(1->3)-beta-D-glucan biosynthetic process	0	1	0	0.835458	1	1	1
cellular_component	GO:0044695	Dsc E3 ubiquitin ligase complex	0	1	0	0.838788	1	1	1
biological_process	GO:0007017	microtubule-based process	0	5	0	0.226046	0.884815	1	1
cellular_component	GO:0062137	cargo receptor complex	0	1	0	0.838788	1	1	1
molecular_function	GO:0005053	peroxisome matrix targeting signal-2 binding	0	1	0	0.837288	1	1	1
molecular_function	GO:0004392	heme oxygenase (decyclizing) activity	0	1	0	0.837288	1	1	1
biological_process	GO:0006788	heme oxidation	0	1	0	0.835458	1	1	1
molecular_function	GO:0004556	alpha-amylase activity	0	4	0	0.491365	1	1	1
molecular_function	GO:0103025	alpha-amylase activity	0	3	0	NA	NA	NA	NA
molecular_function	GO:0003862	3-isopropylmalate dehydrogenase activity	0	2	0	0.701025	1	1	1
biological_process	GO:0009098	leucine biosynthetic process	0	5	0	0.406794	1	1	1
cellular_component	GO:0000811	GINS complex	0	3	0	0.590067	1	1	1
molecular_function	GO:0004521	endoribonuclease activity	0	9	0	0.614914	0.598461	1	1
[truncated: 1,815 more rows]
[truncated: 216 more columns]

## Sheet: polyQ
GO domain	GO ID	GO term	polyQ protein	total number	number / total	raw p-value under-representation	raw p-value over-representation	FWER under-representation	FWER over-representation	Gene Name
cellular_component	GO:0016021	integral component of membrane	148	2094	0.0706781	3.23436e-06	0.999998	0	1	G4N2R4_MAGO7	G4NLU7_MAGO7	G4MZ05_MAGO7	G4N653_MAGO7	G4MKU5_MAGO7	G4NCB0_MAGO7	G4MZA7_MAGO7	G5EGY4_MAGO7	G5EHG1_MAGO7	G5EHM5_MAGO7	G5EH33_MAGO7	G5EHS9_MAGO7	G5EHZ2_MAGO7	G4MM16_MAGO7	G4NBC4_MAGO7	G4MP21_MAGO7	G4N1Q5_MAGO7	G4MW01_MAGO7	G4N7B0_MAGO7	G4N5X0_MAGO7	G4MW56_MAGO7	G4MRL0_MAGO7	G4NHG3_MAGO7	G4MTL7_MAGO7	G4NDY8_MAGO7	G4NBI7_MAGO7	G4N6M5_MAGO7	G4NIK7_MAGO7	G4N965_MAGO7	G4NI13_MAGO7	G4MY84_MAGO7	G4NA51_MAGO7	G4MS91_MAGO7	G4N225_MAGO7	G4MZZ4_MAGO7	G4MV56_MAGO7	G4NK26_MAGO7	G4NB91_MAGO7	G4NG74_MAGO7	G4MZ50_MAGO7
cellular_component	GO:0005634	nucleus	131	691	0.18958	1	6.8991e-18	1	0	STE20_MAGO7	VELB_MAGO7	BC2_MAGO7	MIG1_MAGO7	PABP_MAGO7	XLNR_MAGO7	G4NCZ2_MAGO7	G4NJ62_MAGO7	G5EH81_MAGO7	G5EHT5_MAGO7	G5EHR8_MAGO7	G4N5X1_MAGO7	G4NFL5_MAGO7	G4N4Y2_MAGO7	G4N5Y8_MAGO7	G4NH28_MAGO7	G4MTP5_MAGO7	G4MP21_MAGO7	G4MYL7_MAGO7	G4NDX0_MAGO7	G4MK85_MAGO7	G4N9J4_MAGO7	G4N4R4_MAGO7	G4NLQ6_MAGO7	G4MY97_MAGO7	G4MNL3_MAGO7	G4MT18_MAGO7	G4MWM8_MAGO7	G4N0G9_MAGO7	G4MVQ8_MAGO7	G4NI33_MAGO7	G4MNY3_MAGO7	G4MWP4_MAGO7	G4NCQ0_MAGO7	G4NC65_MAGO7	G4MYB4_MAGO7	G4NCZ6_MAGO7	G4N8L3_MAGO7	G4NKK8_MAGO7	G4N532_MAGO7
molecular_function	GO:0008270	zinc ion binding	84	378	0.222222	1	9.57566e-19	1	0	SEC24_MAGO7	XLNR_MAGO7	G4NCZ2_MAGO7	G5EHS9_MAGO7	G4N5X1_MAGO7	G4NFL5_MAGO7	G4N4Y2_MAGO7	G4N5Y8_MAGO7	G4MP21_MAGO7	G4N4R4_MAGO7	G4NLQ6_MAGO7	G4MT18_MAGO7	G4MWM8_MAGO7	G4MVQ8_MAGO7	G4NFQ2_MAGO7	G4MNY3_MAGO7	G4MWP4_MAGO7	G4N7Q5_MAGO7	G4MNS7_MAGO7	G4NCZ6_MAGO7	G4N8L3_MAGO7	G4NKK8_MAGO7	G4N532_MAGO7	G4N224_MAGO7	G4MPW7_MAGO7	G4MLY5_MAGO7	G4N782_MAGO7	G4N6T1_MAGO7	G4ML50_MAGO7	G4NJD7_MAGO7	G4MSY4_MAGO7	G4N8I4_MAGO7	G4NHP8_MAGO7	G4N9M9_MAGO7	G4NI99_MAGO7	G4N2H5_MAGO7	G4MRK8_MAGO7	G4MPH6_MAGO7	G4MT25_MAGO7	G4NF77_MAGO7
molecular_function	GO:0000981	DNA-binding transcription factor activity, RNA polymerase II-specific	68	189	0.359788	1	2.64681e-28	1	0	XLNR_MAGO7	G4NCZ2_MAGO7	G4N5X1_MAGO7	G4NFL5_MAGO7	G4N5Y8_MAGO7	G4MP21_MAGO7	G4NDX0_MAGO7	G4N4R4_MAGO7	G4NLQ6_MAGO7	G4MT18_MAGO7	G4MWM8_MAGO7	G4MVQ8_MAGO7	G4MWP4_MAGO7	G4MNS7_MAGO7	G4NCZ6_MAGO7	G4N8L3_MAGO7	G4NKK8_MAGO7	G4N532_MAGO7	G4N224_MAGO7	G4MLY5_MAGO7	G4N782_MAGO7	G4N6T1_MAGO7	G4NJD7_MAGO7	G4MSY4_MAGO7	G4N8I4_MAGO7	G4NHP8_MAGO7	G4N9M9_MAGO7	G4NI99_MAGO7	G4N2H5_MAGO7	G4MPH6_MAGO7	G4MT25_MAGO7	G4NF77_MAGO7	G4N362_MAGO7	G4MKE4_MAGO7	G4MTB7_MAGO7	G4NIV0_MAGO7	G4MRM4_MAGO7	G4NF45_MAGO7	G4MY65_MAGO7	G4N111_MAGO7
molecular_function	GO:0003677	DNA binding	55	255	0.215686	1	6.2592e-13	1	0	BC2_MAGO7	XLNR_MAGO7	G4N977_MAGO7	G5EHT5_MAGO7	G4N5X1_MAGO7	G4NFL5_MAGO7	G4N5Y8_MAGO7	G4NH28_MAGO7	G4MP21_MAGO7	G4N265_MAGO7	G4MYL7_MAGO7	G4NDX0_MAGO7	G4MK85_MAGO7	G4NLQ6_MAGO7	G4MNL3_MAGO7	G4MWM8_MAGO7	G4MVQ8_MAGO7	G4NFQ2_MAGO7	G4NCQ0_MAGO7	G4NCZ6_MAGO7	G4MRX2_MAGO7	G4N881_MAGO7	G4N6T1_MAGO7	G4MSY4_MAGO7	G4N8I4_MAGO7	G4NHP8_MAGO7	G4N9M9_MAGO7	G4NI99_MAGO7	G4N2H5_MAGO7	G4MT25_MAGO7	G4NF77_MAGO7	G4MKE4_MAGO7	G4NIH8_MAGO7	G4NIV0_MAGO7	G4MRM4_MAGO7	G4NF45_MAGO7	G4N111_MAGO7	G4N8D9_MAGO7	G4MUI4_MAGO7	G4N0J6_MAGO7
molecular_function	GO:0005524	ATP binding	54	615	0.0878049	0.746339	0.305166	1	1	STE20_MAGO7	DHH1_MAGO7	ATG1_MAGO7	MYO1_MAGO7	G4MKU1_MAGO7	G4NBI6_MAGO7	G4N5A1_MAGO7	G4MUX8_MAGO7	G5EI59_MAGO7	G4NIT3_MAGO7	G4MTP5_MAGO7	G4MK85_MAGO7	G4MME3_MAGO7	G4NII3_MAGO7	G4MR96_MAGO7	G4MWY5_MAGO7	G4MMS0_MAGO7	G4MP38_MAGO7	G4N465_MAGO7	G4N845_MAGO7	G4NHA6_MAGO7	G4NJ22_MAGO7	G4N7I0_MAGO7	G4N8V4_MAGO7	G4MRH5_MAGO7	G4N7F9_MAGO7	G4N814_MAGO7	G4NEB4_MAGO7	G4NG88_MAGO7	G4MVT0_MAGO7	G4MKX6_MAGO7	G4MTA2_MAGO7	G4MZH5_MAGO7	G4NKG6_MAGO7	G4N259_MAGO7	G4NHW7_MAGO7	G4NKK3_MAGO7	G4N3A4_MAGO7	G4N7J5_MAGO7	G4N3T3_MAGO7
biological_process	GO:0006351	transcription, DNA-templated	38	103	0.368932	1	4.23252e-17	1	0	XLNR_MAGO7	G4N5X1_MAGO7	G4NFL5_MAGO7	G4N5Y8_MAGO7	G4MP21_MAGO7	G4NLQ6_MAGO7	G4MWF4_MAGO7	G4MWM8_MAGO7	G4MVQ8_MAGO7	G4NFQ2_MAGO7	G4NCZ6_MAGO7	G4N6T1_MAGO7	G4MSY4_MAGO7	G4N8I4_MAGO7	G4NHP8_MAGO7	G4N9M9_MAGO7	G4NI99_MAGO7	G4N2H5_MAGO7	G4MT25_MAGO7	G4NF77_MAGO7	G4MKE4_MAGO7	G4NIV0_MAGO7	G4MRM4_MAGO7	G4NF45_MAGO7	G4N111_MAGO7	G4MUI4_MAGO7	G4N3Y8_MAGO7	G4MKE2_MAGO7	G4MYA7_MAGO7	G4NBX7_MAGO7	G4MW86_MAGO7	G4N586_MAGO7	G4N8E3_MAGO7	G4MP35_MAGO7	G4NKD0_MAGO7	G4N3D8_MAGO7	G4N498_MAGO7	G4NB10_MAGO7
molecular_function	GO:0046872	metal ion binding	33	459	0.0718954	0.999999	9.82564e-07	1	0	BC2_MAGO7	VPS27_MAGO7	G4N3G8_MAGO7	G4MZ05_MAGO7	G4NH23_MAGO7	G5EI22_MAGO7	G4N848_MAGO7	G4MK85_MAGO7	G4MPD2_MAGO7	G4N1B0_MAGO7	G4MWF4_MAGO7	G4MT73_MAGO7	G4MWU4_MAGO7	G4MKI7_MAGO7	G4NBW8_MAGO7	G4N6W6_MAGO7	G4N1C1_MAGO7	G4NKV1_MAGO7	G4N1N5_MAGO7	G4N6N3_MAGO7	G4NA39_MAGO7	G4N0L5_MAGO7	G4MYW7_MAGO7	G4MZH5_MAGO7	G4MR88_MAGO7	G4NIH8_MAGO7	G4N3A4_MAGO7	G4N5B1_MAGO7	G4MUV3_MAGO7	G4N8F3_MAGO7	G4MVL6_MAGO7	G4MPD3_MAGO7	G4N5F1_MAGO7
cellular_component	GO:0005737	cytoplasm	27	365	0.0739726	5.96744e-05	0.999963	0.001	1	SIP5_MAGO7	STE20_MAGO7	VELB_MAGO7	PABP_MAGO7	G4NJ62_MAGO7	G4N7I3_MAGO7	G4MZ62_MAGO7	G4NI33_MAGO7	G4MYB4_MAGO7	G4MSC5_MAGO7	G4MQ98_MAGO7	G4MV38_MAGO7	G4MRK8_MAGO7	G4MSB9_MAGO7	G4NC03_MAGO7	G4ND41_MAGO7	G4NDQ7_MAGO7	G4MU84_MAGO7	G4MML8_MAGO7	G4MZS0_MAGO7	G4MNZ9_MAGO7	G4NFW4_MAGO7	G4N9H7_MAGO7	G4N4D1_MAGO7	G4N4X5_MAGO7	G4MKC1_MAGO7	G4N6V5_MAGO7
molecular_function	GO:0003723	RNA binding	23	182	0.126374	0.754218	0.310973	1	1	PABP_MAGO7	G4N7I3_MAGO7	G4MMX6_MAGO7	G4MT73_MAGO7	G4MRQ6_MAGO7	G4NAS2_MAGO7	G4MV17_MAGO7	G4NKV1_MAGO7	G4MY51_MAGO7	G4MT14_MAGO7	G4MVL2_MAGO7	G4MNW4_MAGO7	G4MYM6_MAGO7	G4MR34_MAGO7	G4N7J9_MAGO7	G4MKS9_MAGO7	G4N6N5_MAGO7	G4N8S8_MAGO7	G4NLD4_MAGO7	G4N847_MAGO7	G4MKH8_MAGO7	G4NH68_MAGO7	G4N7Z3_MAGO7
molecular_function	GO:0003700	DNA-binding transcription factor activity	16	41	0.390244	1	1.22256e-35	1	0	G4N4Y2_MAGO7	G4MYC8_MAGO7	G4N0G9_MAGO7	G4NB89_MAGO7	G4NCQ0_MAGO7	G4N9G2_MAGO7	G4N5S1_MAGO7	G4NLI4_MAGO7	G4MV05_MAGO7	G4N8G7_MAGO7	G4MX18_MAGO7	G4MWL1_MAGO7	G4MZM4_MAGO7	G4N9W1_MAGO7	G4MNY4_MAGO7	G4N6V5_MAGO7
molecular_function	GO:0004674	protein serine/threonine kinase activity	13	53	0.245283	0.99999	3.96574e-05	1	0.004	ATG1_MAGO7	G4MME3_MAGO7	G4MWY5_MAGO7	G4MMS0_MAGO7	G4N845_MAGO7	G4N814_MAGO7	G4NEB4_MAGO7	G4MVT0_MAGO7	G4MKX6_MAGO7	G4N4D3_MAGO7	G4MWI8_MAGO7	G4NDU6_MAGO7	G4NEM6_MAGO7
biological_process	GO:0006886	intracellular protein transport	12	60	0.2	0.975669	0.0435356	1	1	SEC24_MAGO7	G5EHW2_MAGO7	G5EHR8_MAGO7	G4N0Z8_MAGO7	G4NLE0_MAGO7	G4N1S9_MAGO7	G4MMY1_MAGO7	G4NHB7_MAGO7	G4MR87_MAGO7	G4MZL7_MAGO7	G4ND44_MAGO7	G4NC71_MAGO7
cellular_component	GO:0005829	cytosol	11	123	0.0894309	0.206027	0.866903	1	1	ATG1_MAGO7	G4N604_MAGO7	G4MMY1_MAGO7	G4N7X5_MAGO7	G4MV38_MAGO7	G4N973_MAGO7	G4MZL7_MAGO7	G4MUE8_MAGO7	G4N7T3_MAGO7	G4NC31_MAGO7	G4MNZ9_MAGO7
biological_process	GO:0015031	protein transport	11	87	0.126437	0.995904	0.00742318	1	0.904	SEC31_MAGO7	ATG1_MAGO7	G4N7B1_MAGO7	G4N604_MAGO7	G4NI52_MAGO7	G4N871_MAGO7	G4N008_MAGO7	G4NIB9_MAGO7	G4MSW8_MAGO7	G4NJF3_MAGO7	G4NCT4_MAGO7
cellular_component	GO:0005743	mitochondrial inner membrane	11	97	0.113402	0.344768	0.757126	1	1	G5EHG1_MAGO7	G4NHG3_MAGO7	G4N1C5_MAGO7	G4N7B1_MAGO7	G4NA39_MAGO7	G4MZH5_MAGO7	G4NFW9_MAGO7	G4NDT8_MAGO7	G4ND67_MAGO7	G4MYG9_MAGO7	G4N5R1_MAGO7
molecular_function	GO:0004672	protein kinase activity	11	66	0.166667	0.999999	2.45106e-06	1	0	G4N5A1_MAGO7	G4MUX8_MAGO7	G5EI59_MAGO7	G4N465_MAGO7	G4N7I0_MAGO7	G4NG88_MAGO7	G4NKG6_MAGO7	G4NHW7_MAGO7	G4N7J5_MAGO7	G4NFR5_MAGO7	G4MK82_MAGO7
cellular_component	GO:0005730	nucleolus	10	115	0.0869565	0.22724	0.856739	1	1	G4NAS2_MAGO7	G4NHA6_MAGO7	G4NCA1_MAGO7	G4MNW4_MAGO7	G4N0J6_MAGO7	G4N8S8_MAGO7	G4NBX7_MAGO7	G4MNZ9_MAGO7	G4N847_MAGO7	G4NCW9_MAGO7
molecular_function	GO:0016491	oxidoreductase activity	10	340	0.0294118	1.46469e-09	1	0	1	NEC1_MAGO7	G4MVI1_MAGO7	G4MX93_MAGO7	G4NJB8_MAGO7	G4N0L5_MAGO7	G4NL58_MAGO7	G4NHK7_MAGO7	G4MZ26_MAGO7	G4MN40_MAGO7	G4NDC8_MAGO7
molecular_function	GO:0020037	heme binding	10	170	0.0588235	0.166245	0.900011	1	1	G4MQ54_MAGO7	G4NBW8_MAGO7	G4N6W6_MAGO7	G4N6N3_MAGO7	G4N9D6_MAGO7	G4N0L5_MAGO7	G4MR88_MAGO7	G4NHK6_MAGO7	G4NK61_MAGO7	G4MPE7_MAGO7
biological_process	GO:0006397	mRNA processing	10	47	0.212766	0.996362	0.00802851	1	0.989	DHH1_MAGO7	PABP_MAGO7	G4N9J4_MAGO7	G4MME3_MAGO7	G4MT73_MAGO7	G4N7W7_MAGO7	G4N1C6_MAGO7	G4ND41_MAGO7	G4ND86_MAGO7	G4NH68_MAGO7
molecular_function	GO:0016887	ATP hydrolysis activity	9	150	0.06	0.435596	0.652683	1	1	DHH1_MAGO7	G4NBI6_MAGO7	G4NIT3_MAGO7	G4MK85_MAGO7	G4NII3_MAGO7	G4NHA6_MAGO7	G4N8V4_MAGO7	G4N7F9_MAGO7	G4N7L9_MAGO7
molecular_function	GO:0031177	phosphopantetheine binding	9	34	0.264706	0.999736	0.00124596	1	0.227	NEC1_MAGO7	G4MW47_MAGO7	G4MX94_MAGO7	G4MX93_MAGO7	G4NL58_MAGO7	G4NHK7_MAGO7	G4MQL9_MAGO7	G4NF21_MAGO7	G4MN40_MAGO7
biological_process	GO:0006357	regulation of transcription by RNA polymerase II	9	34	0.264706	0.999989	3.79912e-05	1	0.014	SSN8_MAGO7	MED14_MAGO7	G4N6E4_MAGO7	G4N4Y2_MAGO7	G4MVZ9_MAGO7	G4N0T5_MAGO7	G4MZ09_MAGO7	G4MNE5_MAGO7	G4NLU5_MAGO7
molecular_function	GO:0003824	catalytic activity	9	98	0.0918367	3.51137e-19	1	0	1	G5EH16_MAGO7	G4N4K9_MAGO7	G4NBW8_MAGO7	G4NCV2_MAGO7	G4NE23_MAGO7	G4MPY4_MAGO7	G4N6F7_MAGO7	G4MWH7_MAGO7	G4N1B9_MAGO7
cellular_component	GO:0005789	endoplasmic reticulum membrane	8	108	0.0740741	0.311581	0.788068	1	1	SEC31_MAGO7	SEC24_MAGO7	G5EHM5_MAGO7	G4N7B0_MAGO7	G4MWW2_MAGO7	G4NJF3_MAGO7	G4MQ58_MAGO7	G4MU79_MAGO7
molecular_function	GO:0003676	nucleic acid binding	8	121	0.0661157	1	1.66781e-08	1	0	G5EHH5_MAGO7	G4MR96_MAGO7	G4MP38_MAGO7	G4N1C6_MAGO7	G4MUL7_MAGO7	G4MUF8_MAGO7	G4N7J6_MAGO7	G4ND86_MAGO7
molecular_function	GO:0008168	methyltransferase activity	8	62	0.129032	0.481622	0.64051	1	1	NEC1_MAGO7	G4N6T6_MAGO7	G4NB94_MAGO7	G4MW13_MAGO7	G4NIJ4_MAGO7	G4NHK7_MAGO7	G4NBC0_MAGO7	G4MVC8_MAGO7
molecular_function	GO:0005096	GTPase activator activity	8	25	0.32	0.999997	1.32646e-05	1	0.001	G4N3G8_MAGO7	G4MVB3_MAGO7	G4NKL4_MAGO7	G4MQB0_MAGO7	G4MZK1_MAGO7	G4MQQ3_MAGO7	G4MQB1_MAGO7	G4MUG4_MAGO7
molecular_function	GO:0043130	ubiquitin binding	8	20	0.4	0.999989	9.83578e-05	1	0.021	VPS27_MAGO7	G4NLE0_MAGO7	G4MKY1_MAGO7	G4MNJ5_MAGO7	G4MUH5_MAGO7	G4NEF1_MAGO7	G4MUE8_MAGO7	G4MKC1_MAGO7
molecular_function	GO:0016787	hydrolase activity	8	196	0.0408163	8.10748e-06	0.999996	0.001	1	MYO1_MAGO7	G4N4S3_MAGO7	G4MR96_MAGO7	G4MP38_MAGO7	G4ML29_MAGO7	G4N7K9_MAGO7	G4N8M0_MAGO7	G4MXY4_MAGO7
cellular_component	GO:0016592	mediator complex	8	21	0.380952	0.999955	0.000321656	1	0.042	SSN8_MAGO7	MED14_MAGO7	G4N6E4_MAGO7	G4MVZ9_MAGO7	G4N0T5_MAGO7	G4MSV0_MAGO7	G4MZ09_MAGO7	G4NLU5_MAGO7
molecular_function	GO:0003712	transcription coregulator activity	8	22	0.363636	0.999403	0.00275913	1	0.51	MED14_MAGO7	G4N6E4_MAGO7	G4MR14_MAGO7	G4MVZ9_MAGO7	G4N0T5_MAGO7	G4MKS7_MAGO7	G4MZ09_MAGO7	G4NLU5_MAGO7
biological_process	GO:0006281	DNA repair	7	72	0.0972222	0.747807	0.34712	1	1	G4MTP5_MAGO7	G4MK85_MAGO7	G4MYA8_MAGO7	G4MP38_MAGO7	G4NL14_MAGO7	G4NIH8_MAGO7	G4N5Z2_MAGO7
molecular_function	GO:0106310	protein serine kinase activity	7	30	0.233333	0.997799	0.00909125	1	0.961	STE20_MAGO7	ATG1_MAGO7	G4MME3_MAGO7	G4N845_MAGO7	G4MVT0_MAGO7	G4NFW8_MAGO7	G4NEM6_MAGO7
molecular_function	GO:0004712	protein serine/threonine/tyrosine kinase activity	7	31	0.225806	0.99489	0.0180971	1	0.993	STE20_MAGO7	ATG1_MAGO7	G4MME3_MAGO7	G4N845_MAGO7	G4MVT0_MAGO7	G4NFW8_MAGO7	G4NEM6_MAGO7
molecular_function	GO:0035091	phosphatidylinositol binding	7	18	0.388889	0.999982	0.000111853	1	0.021	VPS27_MAGO7	G4NLE0_MAGO7	G4N604_MAGO7	G4MUH5_MAGO7	G4NEK9_MAGO7	G4MUV9_MAGO7	G4MZL7_MAGO7
molecular_function	GO:0005506	iron ion binding	7	160	0.04375	0.0276777	0.98818	0.752	1	G4MQ54_MAGO7	G4N9D6_MAGO7	G4N0L5_MAGO7	G4NJ47_MAGO7	G4NHK6_MAGO7	G4NK61_MAGO7	G4MPE7_MAGO7
molecular_function	GO:0004497	monooxygenase activity	7	147	0.047619	0.0152	0.993911	0.52	1	G4MQ54_MAGO7	G4N9D6_MAGO7	G4N0L5_MAGO7	G4NKN0_MAGO7	G4NHK6_MAGO7	G4NK61_MAGO7	G4MPE7_MAGO7
molecular_function	GO:0016705	oxidoreductase activity, acting on paired donors, with incorporation or reduction of molecular oxygen	7	129	0.0542636	0.0227401	0.990497	0.692	1	G4MQ54_MAGO7	G4N9D6_MAGO7	G4N0L5_MAGO7	G4NJ47_MAGO7	G4NHK6_MAGO7	G4NK61_MAGO7	G4MPE7_MAGO7
biological_process	GO:0032259	methylation	7	81	0.0864198	0.261852	0.839496	1	1	NEC1_MAGO7	G4N6T6_MAGO7	G4NB94_MAGO7	G4NCB2_MAGO7	G4NHK7_MAGO7	G4NBC0_MAGO7	G4MVC8_MAGO7
molecular_function	GO:0005085	guanyl-nucleotide exchange factor activity	7	28	0.25	0.998648	0.00609623	1	0.731	G5EHW2_MAGO7	G4NKJ4_MAGO7	G4MKY1_MAGO7	G4NJK5_MAGO7	G4MNZ9_MAGO7	G4N9H7_MAGO7	G4NAK1_MAGO7
biological_process	GO:0006355	regulation of transcription, DNA-templated	7	40	0.175	0.999989	3.01714e-05	1	0.012	G4NIN5_MAGO7	G4N7Q5_MAGO7	G4MYB4_MAGO7	G4N8D9_MAGO7	G4N0J6_MAGO7	G4NBX1_MAGO7	G4N4X5_MAGO7
molecular_function	GO:0043565	sequence-specific DNA binding	7	19	0.368421	0.998066	0.00633083	1	0.761	G4N4Y2_MAGO7	G4N0G9_MAGO7	G4N7Q5_MAGO7	G4N8G7_MAGO7	G4MWL1_MAGO7	G4NBX1_MAGO7	G4N9W1_MAGO7
biological_process	GO:0016192	vesicle-mediated transport	7	40	0.175	0.999832	0.000401582	1	0.144	G4N0Z8_MAGO7	G4NLE0_MAGO7	G4MKY1_MAGO7	G4NI52_MAGO7	G4NHB7_MAGO7	G4ND45_MAGO7	G4MLK5_MAGO7
cellular_component	GO:0005886	plasma membrane	6	66	0.0909091	0.843803	0.249674	1	1	PAN1_MAGO7	G4N6M5_MAGO7	G4MNJ5_MAGO7	G4NIF9_MAGO7	G4N1B2_MAGO7	G4N3T3_MAGO7
biological_process	GO:0051028	mRNA transport	6	14	0.428571	0.9934	0.0224951	1	1	DHH1_MAGO7	PABP_MAGO7	G4N871_MAGO7	G4ND41_MAGO7	G4NIB9_MAGO7	G4MSW8_MAGO7
molecular_function	GO:0061630	ubiquitin protein ligase activity	6	18	0.333333	0.999505	0.0031301	1	0.525	G4MPW7_MAGO7	G4N7W7_MAGO7	G4ML50_MAGO7	G4MUH5_MAGO7	G4N1C6_MAGO7	G4N5Z2_MAGO7
molecular_function	GO:0016746	acyltransferase activity	6	24	0.25	0.306755	0.791453	1	1	NEC1_MAGO7	G4MX94_MAGO7	G4MSC5_MAGO7	G4NL58_MAGO7	G4NHK7_MAGO7	G4MN40_MAGO7
biological_process	GO:0006511	ubiquitin-dependent protein catabolic process	6	29	0.206897	0.83844	0.252325	1	1	G4MTP9_MAGO7	G4MS91_MAGO7	G4MPR1_MAGO7	G4N0J9_MAGO7	G4MP02_MAGO7	G4MKC1_MAGO7
biological_process	GO:0051301	cell division	6	49	0.122449	0.895863	0.183749	1	1	G4MTP9_MAGO7	G4N8V4_MAGO7	G4MV38_MAGO7	G4MTB0_MAGO7	G4NDQ7_MAGO7	G4NGP9_MAGO7
cellular_component	GO:0016020	membrane	6	72	0.0833333	5.63227e-05	0.999963	0.001	1	G4N5A1_MAGO7	G4N0F8_MAGO7	G4N604_MAGO7	G4N0L5_MAGO7	G4NC08_MAGO7	G4MSW7_MAGO7
cellular_component	GO:0005643	nuclear pore	6	18	0.333333	0.997411	0.0119072	1	0.875	G4N4E4_MAGO7	G4N675_MAGO7	G4N871_MAGO7	G4NIB9_MAGO7	G4MSW8_MAGO7	G4NKI1_MAGO7
biological_process	GO:0006364	rRNA processing	5	58	0.0862069	0.235403	0.858635	1	1	G4NAS2_MAGO7	G4MNW4_MAGO7	G4MNZ9_MAGO7	G4N847_MAGO7	G4NCW9_MAGO7
cellular_component	GO:0005681	spliceosomal complex	5	31	0.16129	0.832283	0.293131	1	1	SYF1_MAGO7	G4MT14_MAGO7	G4N5Z2_MAGO7	G4NLD4_MAGO7	G4ND86_MAGO7
molecular_function	GO:0003779	actin binding	5	23	0.217391	0.997629	0.00875097	1	0.948	PAN1_MAGO7	G4MVB3_MAGO7	G4MNJ5_MAGO7	G4NGP9_MAGO7	G4MY50_MAGO7
cellular_component	GO:0010494	cytoplasmic stress granule	5	8	0.625	0.999986	0.000278601	1	0.026	DHH1_MAGO7	G4MY97_MAGO7	G4MV17_MAGO7	G4NFW8_MAGO7	G4NC31_MAGO7
molecular_function	GO:0046983	protein dimerization activity	5	18	0.277778	0.997711	0.00731665	1	0.938	MIG1_MAGO7	G5EH94_MAGO7	G4NB40_MAGO7	G4MZ02_MAGO7	G4NCG4_MAGO7
biological_process	GO:0045944	positive regulation of transcription by RNA polymerase II	5	17	0.294118	0.981625	0.0514726	1	1	MIG1_MAGO7	G4NB40_MAGO7	G4MUH5_MAGO7	G4N8G7_MAGO7	G4MWL1_MAGO7
molecular_function	GO:0016874	ligase activity	5	37	0.135135	0.0869766	0.957069	0.997	1	G4MW47_MAGO7	G4NHK7_MAGO7	G4MQL9_MAGO7	G4NC86_MAGO7	G4NF21_MAGO7
molecular_function	GO:0004553	hydrolase activity, hydrolyzing O-glycosyl compounds	5	80	0.0625	0.0024202	0.999235	0.094	1	G5EGY4_MAGO7	G4NE49_MAGO7	G4N191_MAGO7	G4NCZ5_MAGO7	G4N3N5_MAGO7
molecular_function	GO:0017056	structural constituent of nuclear pore	5	11	0.454545	0.999906	0.00109341	1	0.212	G4N4E4_MAGO7	G4N675_MAGO7	G4N871_MAGO7	G4NIB9_MAGO7	G4MSW8_MAGO7
biological_process	GO:0007165	signal transduction	4	29	0.137931	0.973135	0.0463649	1	1	G4NKL4_MAGO7	G4MQB0_MAGO7	G4MQQ3_MAGO7	G4MQB1_MAGO7
molecular_function	GO:0042802	identical protein binding	4	27	0.148148	0.957636	0.115934	1	1	G4MNJ5_MAGO7	G4MRK8_MAGO7	G4N814_MAGO7	G4NC31_MAGO7
cellular_component	GO:0005739	mitochondrion	4	154	0.025974	0.000938016	0.999555	0.021	1	MMM1_MAGO7	G5EH81_MAGO7	G4NDG7_MAGO7	G4NEE2_MAGO7
cellular_component	GO:0000139	Golgi membrane	4	33	0.121212	0.679662	0.525131	1	1	SEC24_MAGO7	G4MLK4_MAGO7	G4NI52_MAGO7	G4NC71_MAGO7
biological_process	GO:0006888	endoplasmic reticulum to Golgi vesicle-mediated transport	4	29	0.137931	0.838628	0.332636	1	1	SEC31_MAGO7	SEC24_MAGO7	G4MVB3_MAGO7	G4NJF3_MAGO7
cellular_component	GO:0043332	mating projection tip	4	10	0.4	0.997112	0.0189117	1	0.934	STE20_MAGO7	MYO1_MAGO7	G4N6M5_MAGO7	G4MUV9_MAGO7
cellular_component	GO:0010008	endosome membrane	4	18	0.222222	0.933303	0.163633	1	1	PAN1_MAGO7	VPS27_MAGO7	G4MNJ5_MAGO7	G4MUH5_MAGO7
molecular_function	GO:0003729	mRNA binding	4	20	0.2	0.991202	0.0351677	1	1	DHH1_MAGO7	G4N654_MAGO7	G4N7X5_MAGO7	G4ND41_MAGO7
cellular_component	GO:0000932	P-body	4	12	0.333333	0.997112	0.0189117	1	0.934	DHH1_MAGO7	G4MY97_MAGO7	G4MV17_MAGO7	G4N7X5_MAGO7
molecular_function	GO:0000287	magnesium ion binding	4	43	0.0930233	0.726518	0.47247	1	1	G4MV17_MAGO7	G4NJ22_MAGO7	G4NC31_MAGO7	G4MUJ2_MAGO7
biological_process	GO:0006629	lipid metabolic process	4	29	0.137931	0.0152731	0.992449	0.699	1	IRS4_MAGO7	G4MS59_MAGO7	G4NBI7_MAGO7	G4MKH6_MAGO7
molecular_function	GO:0030170	pyridoxal phosphate binding	4	49	0.0816327	0.62712	0.577649	1	1	G5EH16_MAGO7	G4N522_MAGO7	G4N2U3_MAGO7	G4MYI6_MAGO7
molecular_function	GO:0046982	protein heterodimerization activity	4	28	0.142857	0.926391	0.191993	1	1	G4NDG2_MAGO7	G4NDQ9_MAGO7	G4MYK2_MAGO7	G4NC05_MAGO7
cellular_component	GO:0030479	actin cortical patch	4	19	0.210526	0.975185	0.0891699	1	1	PAN1_MAGO7	MYO1_MAGO7	G4MY50_MAGO7	G4MSW7_MAGO7
biological_process	GO:0006897	endocytosis	4	19	0.210526	0.996371	0.015526	1	0.998	PAN1_MAGO7	MYO1_MAGO7	G4MNJ5_MAGO7	G4MSW7_MAGO7
biological_process	GO:0035556	intracellular signal transduction	4	15	0.266667	0.663172	0.46156	1	1	G4MSZ4_MAGO7	G4NKJ4_MAGO7	G4NFW8_MAGO7	G4NAK1_MAGO7
molecular_function	GO:0022857	transmembrane transporter activity	4	279	0.0143369	2.24687e-06	0.999999	0	1	G4NE87_MAGO7	G4NHH0_MAGO7	G4N0E1_MAGO7	G4MP65_MAGO7
biological_process	GO:0005975	carbohydrate metabolic process	4	164	0.0243902	2.98044e-05	0.99999	0.002	1	G5EGY4_MAGO7	G4NE49_MAGO7	G4NKH8_MAGO7	G4N191_MAGO7
molecular_function	GO:0003684	damaged DNA binding	4	14	0.285714	0.996146	0.0228495	1	1	G5EH81_MAGO7	G4NCQ8_MAGO7	G4ND24_MAGO7	G4MUE8_MAGO7
molecular_function	GO:0016301	kinase activity	4	30	0.133333	0.999538	0.000935784	1	0.186	G4MUV9_MAGO7	G4NL09_MAGO7	G4N1E0_MAGO7	G4MPF7_MAGO7
biological_process	GO:0070647	protein modification by small protein conjugation or removal	4	19	0.210526	0.921058	0.151143	1	1	G5EHS9_MAGO7	G4MRV5_MAGO7	G4MLQ9_MAGO7	G4MTJ7_MAGO7
molecular_function	GO:0005525	GTP binding	3	118	0.0254237	0.0101648	0.997403	0.369	1	G4N9F5_MAGO7	G4NC31_MAGO7	G4N9R2_MAGO7
biological_process	GO:0000398	mRNA splicing, via spliceosome	3	29	0.103448	0.751332	0.406849	1	1	SYF1_MAGO7	G4MT14_MAGO7	G4N5Z2_MAGO7
biological_process	GO:0000122	negative regulation of transcription by RNA polymerase II	3	11	0.272727	0.977511	0.100587	1	1	STE20_MAGO7	G4MTA2_MAGO7	G4MUE8_MAGO7
biological_process	GO:0034063	stress granule assembly	3	3	1	1	0.000683567	1	0.271	STE20_MAGO7	DHH1_MAGO7	G4NFW8_MAGO7
biological_process	GO:0000184	nuclear-transcribed mRNA catabolic process, nonsense-mediated decay	3	7	0.428571	0.994737	0.0383836	1	1	G4N7I3_MAGO7	G4MV17_MAGO7	G4ND41_MAGO7
biological_process	GO:0000290	deadenylation-dependent decapping of nuclear-transcribed mRNA	3	8	0.375	0.996859	0.0273433	1	1	DHH1_MAGO7	G4N7I3_MAGO7	G4NFW4_MAGO7
biological_process	GO:0008033	tRNA processing	3	18	0.166667	0.545348	0.622112	1	1	G4N6T6_MAGO7	G4N6F7_MAGO7	G4MKS9_MAGO7
cellular_component	GO:0032040	small-subunit processome	3	32	0.09375	0.664069	0.571848	1	1	G4NHA6_MAGO7	G4NCA1_MAGO7	G4NCW9_MAGO7
molecular_function	GO:0005509	calcium ion binding	3	48	0.0625	0.439067	0.764789	1	1	PAN1_MAGO7	G4MNE6_MAGO7	G4MWW2_MAGO7
biological_process	GO:0007005	mitochondrion organization	3	8	0.375	0.775089	0.347968	1	1	MMM1_MAGO7	G4MUH5_MAGO7	G4ND67_MAGO7
biological_process	GO:0007049	cell cycle	3	21	0.142857	0.928451	0.110042	1	1	G4MTP9_MAGO7	G4MTB0_MAGO7	G4NHA0_MAGO7
cellular_component	GO:0005794	Golgi apparatus	3	32	0.09375	0.73933	0.382898	1	1	G4MUH5_MAGO7	G4NJF3_MAGO7	G4MNI5_MAGO7
molecular_function	GO:0004315	3-oxoacyl-[acyl-carrier-protein] synthase activity	3	23	0.130435	0.886533	0.289721	1	1	G4MX93_MAGO7	G4NJB8_MAGO7	G4NCB1_MAGO7
biological_process	GO:0006633	fatty acid biosynthetic process	3	30	0.1	0.791908	0.395064	1	1	G4MX93_MAGO7	G4NJB8_MAGO7	G4NCB1_MAGO7
biological_process	GO:0006352	DNA-templated transcription, initiation	3	7	0.428571	0.674741	0.508959	1	1	G4MVU3_MAGO7	G4NDQ9_MAGO7	G4MYK2_MAGO7
molecular_function	GO:0051015	actin filament binding	3	12	0.25	0.982578	0.0840466	1	1	MYO1_MAGO7	G4N933_MAGO7	G4NKK3_MAGO7
molecular_function	GO:0140359	ABC-type transporter activity	3	39	0.0769231	0.773943	0.41635	1	1	G4N259_MAGO7	G4N3T3_MAGO7	Q2KEJ1_MAGO7
molecular_function	GO:0016740	transferase activity	3	59	0.0508475	0.656567	0.392747	1	1	G4NI80_MAGO7	G4MUV3_MAGO7	G4N2U3_MAGO7
cellular_component	GO:0005935	cellular bud neck	3	14	0.214286	0.9368	0.199348	1	1	G4MY97_MAGO7	G4MTA2_MAGO7	G4N4X5_MAGO7
molecular_function	GO:0004386	helicase activity	3	33	0.0909091	0.631573	0.524831	1	1	G4MR96_MAGO7	G4MNY3_MAGO7	G4N7K9_MAGO7
biological_process	GO:0019441	tryptophan catabolic process to kynurenine	3	8	0.375	0.996859	0.0273433	1	1	G4NBW8_MAGO7	G4N6N3_MAGO7	G4MR88_MAGO7
biological_process	GO:0006289	nucleotide-excision repair	3	16	0.1875	0.89194	0.282017	1	1	G4NCQ8_MAGO7	G4ML50_MAGO7	G4MUE8_MAGO7
molecular_function	GO:0004843	thiol-dependent deubiquitinase	3	20	0.15	0.924899	0.221556	1	1	G5EHE1_MAGO7	G4MS91_MAGO7	G4MP02_MAGO7
molecular_function	GO:0019901	protein kinase binding	3	9	0.333333	0.993768	0.0422993	1	1	G5EGW0_MAGO7	G4MNC3_MAGO7	G4N357_MAGO7
biological_process	GO:0000079	regulation of cyclin-dependent protein serine/threonine kinase activity	3	7	0.428571	0.998313	0.0182673	1	1	G5EGW0_MAGO7	G4MNC3_MAGO7	G4N357_MAGO7
molecular_function	GO:0004725	protein tyrosine phosphatase activity	3	18	0.166667	0.935953	0.199588	1	1	G4MZ37_MAGO7	G4N549_MAGO7	G4NLN4_MAGO7
molecular_function	GO:0005484	SNAP receptor activity	3	8	0.375	0.997628	0.0223177	1	1	G4NI52_MAGO7	G4NHB7_MAGO7	G4MTY1_MAGO7
molecular_function	GO:0051213	dioxygenase activity	3	33	0.0909091	0.390033	0.799843	1	1	G4MR88_MAGO7	G4NJ47_MAGO7	G4N618_MAGO7
cellular_component	GO:0000124	SAGA complex	3	9	0.333333	0.993992	0.0421328	1	0.995	G4MR14_MAGO7	G4NDG2_MAGO7	G4NDQ9_MAGO7
cellular_component	GO:0005856	cytoskeleton	3	10	0.3	0.454317	0.671339	1	1	G4MVB3_MAGO7	G4MNJ5_MAGO7	G4NFW8_MAGO7
biological_process	GO:0006302	double-strand break repair	3	10	0.3	0.93449	0.161372	1	1	G4ND24_MAGO7	G4N7K9_MAGO7	G4MPV1_MAGO7
molecular_function	GO:0030674	protein-macromolecule adaptor activity	3	7	0.428571	0.999414	0.00306638	1	0.518	G4MNJ5_MAGO7	G4MUV9_MAGO7	G4MUE8_MAGO7
molecular_function	GO:0071949	FAD binding	2	76	0.0263158	0.0452043	0.988572	0.924	1	G4NCT5_MAGO7	G4NCB2_MAGO7
molecular_function	GO:0003924	GTPase activity	2	84	0.0238095	0.0252452	0.994213	0.744	1	G4N9F5_MAGO7	G4NC31_MAGO7
cellular_component	GO:0005694	chromosome	2	11	0.181818	0.023401	0.988896	0.507	1	G4MK85_MAGO7	G4N8V4_MAGO7
biological_process	GO:0006412	translation	2	114	0.0175439	0.00810404	0.9964	0.443	1	G4NE69_MAGO7	G4NC03_MAGO7
molecular_function	GO:0003724	RNA helicase activity	2	29	0.0689655	0.572471	0.699313	1	1	DHH1_MAGO7	G4NHA6_MAGO7
molecular_function	GO:0004252	serine-type endopeptidase activity	2	48	0.0416667	0.235211	0.91329	1	1	G4N225_MAGO7	G4MQ68_MAGO7
cellular_component	GO:0005759	mitochondrial matrix	2	37	0.0540541	0.0929441	0.966961	0.973	1	G4N1C1_MAGO7	G4MZH5_MAGO7
cellular_component	GO:0005576	extracellular region	2	147	0.0136054	2.50149e-05	0.999997	0	1	G4NA51_MAGO7	G4NBN8_MAGO7
biological_process	GO:0006325	chromatin organization	2	41	0.0487805	0.480507	0.647996	1	1	G4NI80_MAGO7	G4N1E0_MAGO7
cellular_component	GO:0000974	Prp19 complex	2	6	0.333333	0.987653	0.0979303	1	1	G4N5D4_MAGO7	G4N5Z2_MAGO7
cellular_component	GO:0005654	nucleoplasm	2	14	0.142857	0.968407	0.0608594	1	0.998	G4MUE8_MAGO7	G4N8S8_MAGO7
molecular_function	GO:0051082	unfolded protein binding	2	33	0.0606061	0.485766	0.765342	1	1	G4MNI8_MAGO7	G4N1N5_MAGO7
biological_process	GO:0006890	retrograde vesicle-mediated transport, Golgi to endoplasmic reticulum	2	17	0.117647	0.814864	0.450954	1	1	G4MVB3_MAGO7	G4MTY1_MAGO7
biological_process	GO:0000045	autophagosome assembly	2	7	0.285714	0.9339	0.253074	1	1	ATG1_MAGO7	G4NC26_MAGO7
molecular_function	GO:0004222	metalloendopeptidase activity	2	30	0.0666667	0.550214	0.717136	1	1	G4N3X7_MAGO7	G4N5F1_MAGO7
cellular_component	GO:0030176	integral component of endoplasmic reticulum membrane	2	13	0.153846	0.698973	0.58567	1	1	MMM1_MAGO7	G4N008_MAGO7
cellular_component	GO:0005741	mitochondrial outer membrane	2	20	0.1	0.473044	0.775265	1	1	MMM1_MAGO7	G4ND44_MAGO7
molecular_function	GO:0008289	lipid binding	2	19	0.105263	0.998942	0.00333698	1	0.538	MMM1_MAGO7	G4NFC0_MAGO7
cellular_component	GO:0071014	post-mRNA release spliceosomal complex	2	15	0.133333	0.800652	0.469924	1	1	G4NHA6_MAGO7	G4N5D4_MAGO7
biological_process	GO:0008380	RNA splicing	2	19	0.105263	0.6777	0.467345	1	1	G4ND41_MAGO7	G4ND86_MAGO7
biological_process	GO:0006417	regulation of translation	2	7	0.285714	0.99089	0.0253504	1	1	PABP_MAGO7	G4ND41_MAGO7
biological_process	GO:0000289	nuclear-transcribed mRNA poly(A) tail shortening	2	5	0.4	0.998313	0.0182673	1	1	G4NIN5_MAGO7	G4MYB4_MAGO7
molecular_function	GO:0016538	cyclin-dependent protein serine/threonine kinase regulator activity	2	7	0.285714	0.968521	0.1641	1	1	SSN8_MAGO7	G4MNC3_MAGO7
cellular_component	GO:0005768	endosome	2	14	0.142857	0.910188	0.181202	1	1	G4MVB3_MAGO7	G4MR87_MAGO7
biological_process	GO:0006338	chromatin remodeling	2	26	0.0769231	0.457122	0.729604	1	1	G4MYA8_MAGO7	G4N0U6_MAGO7
cellular_component	GO:0005635	nuclear envelope	2	11	0.181818	0.972265	0.0674117	1	0.999	G4NB99_MAGO7	G4N8S8_MAGO7
cellular_component	GO:0031225	anchored component of membrane	2	26	0.0769231	0.569896	0.702629	1	1	G4MML4_MAGO7	G4N0Y3_MAGO7
cellular_component	GO:0030014	CCR4-NOT complex	2	4	0.5	0.999721	0.00359541	1	0.396	G4MYM6_MAGO7	G4MUF8_MAGO7
cellular_component	GO:0030015	CCR4-NOT core complex	2	5	0.4	0.993379	0.0694027	1	0.999	G4NIN5_MAGO7	G4MYB4_MAGO7
molecular_function	GO:0031267	small GTPase binding	2	17	0.117647	0.842525	0.41096	1	1	G5EHR8_MAGO7	G4NGP9_MAGO7
biological_process	GO:0034599	cellular response to oxidative stress	2	24	0.0833333	0.520838	0.740681	1	1	G4N1C1_MAGO7	G4MPS3_MAGO7
biological_process	GO:0055085	transmembrane transport	2	40	0.05	0.0594868	0.975573	0.996	1	G4N2L9_MAGO7	G4MYG9_MAGO7
cellular_component	GO:1990316	Atg1/ULK1 kinase complex	2	2	1	1	0.00836345	1	0.818	ATG1_MAGO7	G4NC26_MAGO7
biological_process	GO:0046777	protein autophosphorylation	2	3	0.666667	0.999316	0.0219824	1	1	ATG1_MAGO7	G4N814_MAGO7
cellular_component	GO:0005628	prospore membrane	2	5	0.4	0.993379	0.0694027	1	0.999	MYO1_MAGO7	G4MZL7_MAGO7
biological_process	GO:0000147	actin cortical patch assembly	2	3	0.666667	0.999316	0.0219824	1	1	MYO1_MAGO7	G4MSW7_MAGO7
biological_process	GO:0071963	establishment or maintenance of cell polarity regulating cell shape	2	8	0.25	0.961616	0.18553	1	1	MYO1_MAGO7	G4MUV9_MAGO7
molecular_function	GO:0016757	glycosyltransferase activity	2	29	0.0689655	0.459973	0.678647	1	1	G4MQ31_MAGO7	G4N1M3_MAGO7
cellular_component	GO:0005758	mitochondrial intermembrane space	2	20	0.1	0.698973	0.58567	1	1	G4NJ62_MAGO7	G4N1C5_MAGO7
cellular_component	GO:0000785	chromatin	2	44	0.0454545	0.0664817	0.97465	0.918	1	G4N814_MAGO7	G4NC05_MAGO7
biological_process	GO:0006874	cellular calcium ion homeostasis	2	6	0.333333	0.899413	0.321102	1	1	G4NGV0_MAGO7	G4MWW2_MAGO7
biological_process	GO:0030968	endoplasmic reticulum unfolded protein response	2	4	0.5	0.981733	0.121459	1	1	G4MME3_MAGO7	G4MQ58_MAGO7
biological_process	GO:0007264	small GTPase mediated signal transduction	2	17	0.117647	0.497689	0.757707	1	1	G4N9F5_MAGO7	G4N9H7_MAGO7
molecular_function	GO:0050660	flavin adenine dinucleotide binding	2	64	0.03125	0.00824042	0.997603	0.281	1	G4NEQ1_MAGO7	G4N485_MAGO7
molecular_function	GO:0008017	microtubule binding	2	13	0.153846	0.881378	0.350693	1	1	G4MKU1_MAGO7	G4MRH5_MAGO7
molecular_function	GO:0003777	microtubule motor activity	2	9	0.222222	0.945277	0.225624	1	1	G4MKU1_MAGO7	G4MRH5_MAGO7
biological_process	GO:0007018	microtubule-based movement	2	12	0.166667	0.791417	0.48125	1	1	G4MKU1_MAGO7	G4MRH5_MAGO7
biological_process	GO:0006457	protein folding	2	28	0.0714286	0.327672	0.841907	1	1	G4MNI8_MAGO7	G4N1N5_MAGO7
molecular_function	GO:0005507	copper ion binding	2	32	0.0625	0.50682	0.750123	1	1	G5EHG1_MAGO7	G5EH07_MAGO7
molecular_function	GO:0000155	phosphorelay sensor kinase activity	2	10	0.2	0.957701	0.194551	1	1	G4N1Z5_MAGO7	G4NKR9_MAGO7
biological_process	GO:0006887	exocytosis	2	10	0.2	0.899413	0.321102	1	1	G5EHW2_MAGO7	G4N971_MAGO7
biological_process	GO:0006139	nucleobase-containing compound metabolic process	2	9	0.222222	1	8.52663e-08	1	0	G4N4K9_MAGO7	G4NCV2_MAGO7
biological_process	GO:0016579	protein deubiquitination	2	14	0.142857	0.859309	0.387527	1	1	G4MS91_MAGO7	G4MP02_MAGO7
molecular_function	GO:0047617	acyl-CoA hydrolase activity	2	7	0.285714	0.985162	0.106551	1	1	G4NEK9_MAGO7	G4N4D1_MAGO7
biological_process	GO:0045892	negative regulation of transcription, DNA-templated	2	12	0.166667	0.92399	0.159088	1	1	G4N0G9_MAGO7	G4NI80_MAGO7
molecular_function	GO:0031625	ubiquitin protein ligase binding	2	8	0.25	0.977682	0.134629	1	1	G4MTP9_MAGO7	G4N0J9_MAGO7
biological_process	GO:0016575	histone deacetylation	2	4	0.5	0.994031	0.0650375	1	1	G4MPP9_MAGO7	G4N4X5_MAGO7
molecular_function	GO:0016614	oxidoreductase activity, acting on CH-OH group of donors	2	25	0.08	0.0215355	0.993935	0.67	1	G4NEQ1_MAGO7	G4N485_MAGO7
biological_process	GO:0000272	polysaccharide catabolic process	2	38	0.0526316	0.0535046	0.980321	0.995	1	G4NCZ5_MAGO7	G4N3N5_MAGO7
cellular_component	GO:0043229	intracellular organelle	2	7	0.285714	0.999997	4.59225e-06	1	0.001	G4MKP7_MAGO7	G4MSH0_MAGO7
biological_process	GO:0016197	endosomal transport	2	4	0.5	0.967758	0.0950449	1	1	G4MMY1_MAGO7	G4N7N3_MAGO7
biological_process	GO:0007034	vacuolar transport	2	13	0.153846	0.863609	0.27605	1	1	G4NLE0_MAGO7	G4MR87_MAGO7
cellular_component	GO:0005669	transcription factor TFIID complex	2	10	0.2	0.943795	0.231296	1	1	G4MVU3_MAGO7	G4NDQ9_MAGO7
molecular_function	GO:0004198	calcium-dependent cysteine-type endopeptidase activity	2	5	0.4	0.995199	0.0565723	1	1	G4N265_MAGO7	G4MXS6_MAGO7
biological_process	GO:0048193	Golgi vesicle transport	2	6	0.333333	0.876168	0.224013	1	1	G4MLK4_MAGO7	G4MV33_MAGO7
biological_process	GO:0006367	transcription initiation from RNA polymerase II promoter	2	17	0.117647	0.390654	0.829028	1	1	G4MXK1_MAGO7	G4ML50_MAGO7
biological_process	GO:0008152	metabolic process	2	10	0.2	0.0250553	0.981738	0.853	1	G4NL58_MAGO7	G4MN40_MAGO7
cellular_component	GO:0110165	cellular anatomical entity	2	26	0.0769231	0.0214262	0.992547	0.49	1	G4N9N6_MAGO7	G4MQ68_MAGO7
biological_process	GO:0060237	regulation of fungal-type cell wall organization	2	4	0.5	0.997445	0.0414102	1	1	G4MY97_MAGO7	G4NFW8_MAGO7
molecular_function	GO:0140684	histone H3-tri/dimethyl-lysine-9 demethylase activity	2	2	1	NA	NA	NA	NA	G4MPD2_MAGO7	G4MPD3_MAGO7
cellular_component	GO:0035267	NuA4 histone acetyltransferase complex	2	7	0.285714	0.993992	0.0421328	1	0.995	G4MXK8_MAGO7	G4MYA8_MAGO7
molecular_function	GO:0046873	metal ion transmembrane transporter activity	2	12	0.166667	0.344505	0.83042	1	1	G4N402_MAGO7	G4N7T2_MAGO7
biological_process	GO:0042147	retrograde transport, endosome to Golgi	2	11	0.181818	0.9339	0.253074	1	1	G4N604_MAGO7	G4MZL7_MAGO7
cellular_component	GO:0032153	cell division site	2	12	0.166667	0.679662	0.525131	1	1	G4MUV9_MAGO7	G4NGP9_MAGO7
biological_process	GO:0006606	protein import into nucleus	2	13	0.153846	0.859309	0.387527	1	1	G4NB99_MAGO7	G4MZS0_MAGO7
biological_process	GO:0032880	regulation of protein localization	2	4	0.5	0.986757	0.0565959	1	1	G4MUH5_MAGO7	G4MTA2_MAGO7
cellular_component	GO:0046695	SLIK (SAGA-like) complex	2	6	0.333333	0.987653	0.0979303	1	1	G4NDG2_MAGO7	G4NDQ9_MAGO7
molecular_function	GO:0019888	protein phosphatase regulator activity	2	5	0.4	0.996005	0.0314791	1	1	G4MZZ4_MAGO7	G4MSF0_MAGO7
biological_process	GO:0001522	pseudouridine synthesis	2	7	0.285714	0.9339	0.253074	1	1	G4MKS9_MAGO7	G4N8S8_MAGO7
cellular_component	GO:0000502	proteasome complex	2	3	0.666667	0.365989	0.843917	1	1	G4MSB9_MAGO7	G4MRM8_MAGO7
biological_process	GO:0032981	mitochondrial respiratory chain complex I assembly	2	4	0.5	0.997445	0.0414102	1	1	G4NDT8_MAGO7	G4N5R1_MAGO7
molecular_function	GO:0003899	DNA-directed 5'-3' RNA polymerase activity	2	13	0.153846	0.572471	0.699313	1	1	G4N973_MAGO7	G4NBX7_MAGO7
molecular_function	GO:0004842	ubiquitin-protein transferase activity	2	13	0.153846	0.998069	0.00737143	1	0.942	G4MYM6_MAGO7	G4NC86_MAGO7
biological_process	GO:0006261	DNA-dependent DNA replication	2	5	0.4	0.597678	0.607249	1	1	G4MRX2_MAGO7	G4N7K9_MAGO7
biological_process	GO:0030036	actin cytoskeleton organization	2	7	0.285714	0.829122	0.309158	1	1	G4N7N3_MAGO7	G4NGP9_MAGO7
molecular_function	GO:0030276	clathrin binding	2	5	0.4	0.999658	0.00399491	1	0.608	G4N7C0_MAGO7	G4MSW7_MAGO7
biological_process	GO:0055088	lipid homeostasis	2	4	0.5	0.972657	0.152831	1	1	G4MTA2_MAGO7	G4ND67_MAGO7
molecular_function	GO:0005546	phosphatidylinositol-4,5-bisphosphate binding	2	2	1	1	0.00668101	1	0.936	G4N7N3_MAGO7	G4MSW7_MAGO7
molecular_function	GO:0043138	3'-5' DNA helicase activity	1	3	0.333333	0.943428	0.347532	1	1	G4MP38_MAGO7
molecular_function	GO:0004693	cyclin-dependent protein serine/threonine kinase activity	1	3	0.333333	0.981046	0.225971	1	1	G4MTA2_MAGO7
cellular_component	GO:0005672	transcription factor TFIIA complex	1	3	0.333333	0.976434	0.250329	1	1	G4MXK1_MAGO7
biological_process	GO:0061709	reticulophagy	1	3	0.333333	0.978018	0.242398	1	1	ATG1_MAGO7
biological_process	GO:0015914	phospholipid transport	1	5	0.2	0.981733	0.121459	1	1	G4NJ22_MAGO7
molecular_function	GO:0003735	structural constituent of ribosome	1	127	0.00787402	0.000215635	0.999983	0.009	1	G4NC03_MAGO7
cellular_component	GO:0030127	COPII vesicle coat	1	5	0.2	0.930597	0.381411	1	1	SEC24_MAGO7
cellular_component	GO:0012507	ER to Golgi transport vesicle membrane	1	4	0.25	0.957867	0.196278	1	1	SEC31_MAGO7
molecular_function	GO:0000386	second spliceosomal transesterification activity	1	3	0.333333	0.981046	0.225971	1	1	G4N5D4_MAGO7
biological_process	GO:0031124	mRNA 3'-end processing	1	5	0.2	0.879985	0.354616	1	1	G4MR34_MAGO7
cellular_component	GO:0000131	incipient cellular bud site	1	5	0.2	0.930597	0.381411	1	1	STE20_MAGO7
molecular_function	GO:0019899	enzyme binding	1	1	1	0.997157	0.00941262	1	0.965	STE20_MAGO7
molecular_function	GO:0044025	histone kinase activity (H2B-S14 specific)	1	1	1	1	0.0818233	1	1	STE20_MAGO7
biological_process	GO:0007121	bipolar cellular bud site selection	1	2	0.5	0.992217	0.168926	1	1	STE20_MAGO7
biological_process	GO:0007118	budding cell apical bud growth	1	1	1	0.992217	0.168926	1	1	STE20_MAGO7
biological_process	GO:0001403	invasive growth in response to glucose limitation	1	4	0.25	0.981733	0.121459	1	1	STE20_MAGO7
biological_process	GO:0010629	negative regulation of gene expression	1	1	1	0.999631	0.00126323	1	0.386	STE20_MAGO7
biological_process	GO:0007232	osmosensory signaling pathway via Sho1 osmosensor	1	2	0.5	0.992217	0.168926	1	1	STE20_MAGO7
biological_process	GO:0000750	pheromone-dependent signal transduction involved in conjugation with cellular fusion	1	3	0.333333	0.95859	0.309394	1	1	STE20_MAGO7
biological_process	GO:0043065	positive regulation of apoptotic process	1	1	1	1	0.0883546	1	1	STE20_MAGO7
biological_process	GO:0007124	pseudohyphal growth	1	3	0.333333	0.95859	0.309394	1	1	STE20_MAGO7
biological_process	GO:0007096	regulation of exit from mitosis	1	3	0.333333	0.981733	0.121459	1	1	STE20_MAGO7
biological_process	GO:0001402	signal transduction involved in filamentous growth	1	1	1	1	0.0883546	1	1	STE20_MAGO7
biological_process	GO:0035376	sterol import	1	1	1	1	0.0883546	1	1	STE20_MAGO7
biological_process	GO:0000011	vacuole inheritance	1	2	0.5	0.992217	0.168926	1	1	STE20_MAGO7
biological_process	GO:0030435	sporulation resulting in formation of a cellular spore	1	9	0.111111	0.791417	0.48125	1	1	VELB_MAGO7
cellular_component	GO:0034045	phagophore assembly site membrane	1	11	0.0909091	0.733348	0.652651	1	1	ATG1_MAGO7
molecular_function	GO:1990446	U1 snRNP binding	1	2	0.5	0.993319	0.156966	1	1	G4NH68_MAGO7
molecular_function	GO:0008237	metallopeptidase activity	1	24	0.0416667	0.106368	0.955832	0.998	1	G4N5D4_MAGO7
molecular_function	GO:0008235	metalloexopeptidase activity	1	18	0.0555556	0.149104	0.967537	1	1	G4MWU4_MAGO7
biological_process	GO:0006369	termination of RNA polymerase II transcription	1	3	0.333333	0.908025	0.426184	1	1	G4N654_MAGO7
cellular_component	GO:0005732	sno(s)RNA-containing ribonucleoprotein complex	1	10	0.1	0.499347	0.823025	1	1	G4N8S8_MAGO7
cellular_component	GO:0046540	U4/U6 x U5 tri-snRNP complex	1	16	0.0625	0.561908	0.785398	1	1	G4N5D4_MAGO7
biological_process	GO:0000463	maturation of LSU-rRNA from tricistronic rRNA transcript (SSU-rRNA, 5.8S rRNA, LSU-rRNA)	1	15	0.0666667	0.580319	0.773145	1	1	G4NHA6_MAGO7
molecular_function	GO:0003855	3-dehydroquinate dehydratase activity	1	5	0.2	0.943428	0.347532	1	1	G4MUI5_MAGO7
biological_process	GO:0000350	generation of catalytic spliceosome for second transesterification step	1	3	0.333333	0.978018	0.242398	1	1	G4N5D4_MAGO7
molecular_function	GO:0003743	translation initiation factor activity	1	44	0.0227273	0.11402	0.976992	1	1	G4MZ62_MAGO7
cellular_component	GO:0000407	phagophore assembly site	1	7	0.142857	0.775907	0.500653	1	1	G4NC26_MAGO7
cellular_component	GO:0000935	division septum	1	9	0.111111	0.803722	0.578934	1	1	G5EHW2_MAGO7
molecular_function	GO:0016853	isomerase activity	1	15	0.0666667	0.0397848	0.990166	0.876	1	G4NFW4_MAGO7
molecular_function	GO:0017108	5'-flap endonuclease activity	1	4	0.25	0.964136	0.28934	1	1	G4MK85_MAGO7
cellular_component	GO:0070469	respirasome	1	13	0.0769231	0.209181	0.94956	1	1	G4NDT8_MAGO7
biological_process	GO:0010508	positive regulation of autophagy	1	5	0.2	0.917436	0.287176	1	1	G4N8C1_MAGO7
molecular_function	GO:0070122	isopeptidase activity	1	8	0.125	0.865371	0.495097	1	1	G4N5D4_MAGO7
molecular_function	GO:0004713	protein tyrosine kinase activity	1	2	0.5	0.993319	0.156966	1	1	G4NEM6_MAGO7
biological_process	GO:0032933	SREBP signaling pathway	1	3	0.333333	0.981733	0.121459	1	1	G4NB40_MAGO7
biological_process	GO:0007015	actin filament organization	1	8	0.125	0.749342	0.479162	1	1	G4MSW7_MAGO7
cellular_component	GO:0005854	nascent polypeptide-associated complex	1	3	0.333333	0.976434	0.250329	1	1	G4MQ86_MAGO7
biological_process	GO:0000422	autophagy of mitochondrion	1	5	0.2	0.908025	0.426184	1	1	ATG1_MAGO7
cellular_component	GO:0005849	mRNA cleavage factor complex	1	4	0.25	0.803722	0.578934	1	1	G4N654_MAGO7
cellular_component	GO:0032865	ERMES complex	1	5	0.2	0.930597	0.381411	1	1	MMM1_MAGO7
molecular_function	GO:0120013	lipid transfer activity	1	2	0.5	0.964136	0.28934	1	1	MMM1_MAGO7
biological_process	GO:0015917	aminophospholipid transport	1	1	1	1	0.0883546	1	1	MMM1_MAGO7
biological_process	GO:0000002	mitochondrial genome maintenance	1	16	0.0625	0.51875	0.811637	1	1	MMM1_MAGO7
biological_process	GO:0070096	mitochondrial outer membrane translocase complex assembly	1	3	0.333333	0.978018	0.242398	1	1	MMM1_MAGO7
biological_process	GO:1990456	mitochondrion-endoplasmic reticulum membrane tethering	1	3	0.333333	0.978018	0.242398	1	1	MMM1_MAGO7
biological_process	GO:0045040	protein insertion into mitochondrial outer membrane	1	5	0.2	0.934963	0.370483	1	1	MMM1_MAGO7
biological_process	GO:0000723	telomere maintenance	1	13	0.0769231	0.489502	0.828367	1	1	MMM1_MAGO7
biological_process	GO:0006869	lipid transport	1	12	0.0833333	0.91617	0.211441	1	1	G4NFC0_MAGO7
cellular_component	GO:0098562	cytoplasmic side of membrane	1	1	1	0.987653	0.0979303	1	1	DHH1_MAGO7
molecular_function	GO:0003682	chromatin binding	1	25	0.04	0.528315	0.734064	1	1	DHH1_MAGO7
biological_process	GO:0045900	negative regulation of translational elongation	1	1	1	0.992217	0.168926	1	1	DHH1_MAGO7
biological_process	GO:0033962	P-body assembly	1	1	1	1	0.00778319	1	0.988	DHH1_MAGO7
biological_process	GO:0045727	positive regulation of translation	1	2	0.5	0.746926	0.639078	1	1	DHH1_MAGO7
biological_process	GO:0010603	regulation of cytoplasmic mRNA processing body assembly	1	1	1	1	0.00778319	1	0.988	DHH1_MAGO7
molecular_function	GO:0017070	U6 snRNA binding	1	2	0.5	0.993319	0.156966	1	1	G4N5D4_MAGO7
biological_process	GO:0045292	mRNA cis splicing, via spliceosome	1	13	0.0769231	0.837548	0.419681	1	1	G4NLD4_MAGO7
cellular_component	GO:0005684	U2-type spliceosomal complex	1	4	0.25	0.561908	0.785398	1	1	G4NHA6_MAGO7
cellular_component	GO:0005934	cellular bud tip	1	9	0.111111	0.803722	0.578934	1	1	G4MUH5_MAGO7
biological_process	GO:0016973	poly(A)+ mRNA export from nucleus	1	10	0.1	0.780921	0.603987	1	1	G4MUH5_MAGO7
biological_process	GO:0006979	response to oxidative stress	1	11	0.0909091	0.523405	0.699932	1	1	G4N7K9_MAGO7
biological_process	GO:0045721	negative regulation of gluconeogenesis	1	5	0.2	0.934963	0.370483	1	1	G4N7T3_MAGO7
molecular_function	GO:0004128	cytochrome-b5 reductase activity, acting on NAD(P)H	1	12	0.0833333	0.742986	0.641378	1	1	G4N6N3_MAGO7
molecular_function	GO:0008234	cysteine-type peptidase activity	1	4	0.25	0.958849	0.104207	1	1	G4MST5_MAGO7
biological_process	GO:0006915	apoptotic process	1	6	0.166667	0.972657	0.152831	1	1	G4MRM8_MAGO7
molecular_function	GO:0000977	RNA polymerase II transcription regulatory region sequence-specific DNA binding	1	2	0.5	0.964136	0.28934	1	1	MIG1_MAGO7
molecular_function	GO:0016829	lyase activity	1	29	0.0344828	0.0450723	0.98075	0.922	1	G4MYI6_MAGO7
molecular_function	GO:0030151	molybdenum ion binding	1	7	0.142857	0.893449	0.450039	1	1	G5EH16_MAGO7
molecular_function	GO:0004806	triglyceride lipase activity	1	7	0.142857	0.893449	0.450039	1	1	G4MQR8_MAGO7
biological_process	GO:0016042	lipid catabolic process	1	23	0.0434783	0.119094	0.97582	1	1	G4MQR8_MAGO7
cellular_component	GO:0070971	endoplasmic reticulum exit site	1	3	0.333333	0.976434	0.250329	1	1	SEC24_MAGO7
molecular_function	GO:0001228	DNA-binding transcription activator activity, RNA polymerase II-specific	1	5	0.2	0.943428	0.347532	1	1	G4NC05_MAGO7
biological_process	GO:0048315	conidium formation	1	9	0.111111	0.948667	0.219079	1	1	G4N1B2_MAGO7
biological_process	GO:0000083	regulation of transcription involved in G1/S transition of mitotic cell cycle	1	5	0.2	0.961616	0.18553	1	1	G4MTA2_MAGO7
molecular_function	GO:0004535	poly(A)-specific ribonuclease activity	1	3	0.333333	0.981046	0.225971	1	1	G4MUF8_MAGO7
biological_process	GO:0009231	riboflavin biosynthetic process	1	8	0.125	0.847169	0.523277	1	1	G4N9R2_MAGO7
biological_process	GO:0006627	protein processing involved in protein targeting to mitochondrion	1	4	0.25	0.95859	0.309394	1	1	G4N5F1_MAGO7
biological_process	GO:0072671	mitochondria-associated ubiquitin-dependent protein catabolic process	1	2	0.5	0.992217	0.168926	1	1	G4MUH5_MAGO7
biological_process	GO:0030433	ubiquitin-dependent ERAD pathway	1	20	0.05	0.692934	0.591519	1	1	G4MQ58_MAGO7
molecular_function	GO:0005198	structural molecule activity	1	11	0.0909091	0.0466602	0.978805	0.929	1	G4N0Z8_MAGO7
biological_process	GO:0045893	positive regulation of transcription, DNA-templated	1	2	0.5	0.980355	0.0508583	1	1	G4N0G9_MAGO7
cellular_component	GO:0030173	integral component of Golgi membrane	1	9	0.111111	0.803722	0.578934	1	1	G4MLK4_MAGO7
biological_process	GO:0030071	regulation of mitotic metaphase/anaphase transition	1	4	0.25	0.645384	0.726819	1	1	G4N6S5_MAGO7
biological_process	GO:0006310	DNA recombination	1	24	0.0416667	0.508371	0.687386	1	1	G4MP38_MAGO7
biological_process	GO:0006260	DNA replication	1	24	0.0416667	0.377888	0.776124	1	1	G4MP38_MAGO7
biological_process	GO:0000466	maturation of 5.8S rRNA from tricistronic rRNA transcript (SSU-rRNA, 5.8S rRNA, LSU-rRNA)	1	8	0.125	0.431602	0.803106	1	1	G4NHA6_MAGO7
biological_process	GO:0042254	ribosome biogenesis	1	23	0.0434783	0.230715	0.851368	1	1	G4N8S8_MAGO7
cellular_component	GO:0005874	microtubule	1	34	0.0294118	0.276967	0.892999	1	1	G4MKU1_MAGO7
cellular_component	GO:0031011	Ino80 complex	1	13	0.0769231	0.662977	0.713489	1	1	G4MXK8_MAGO7
molecular_function	GO:0031593	polyubiquitin modification-dependent protein binding	1	3	0.333333	0.981046	0.225971	1	1	G4MUE8_MAGO7
biological_process	GO:0031145	anaphase-promoting complex-dependent catabolic process	1	7	0.142857	0.878541	0.476972	1	1	G4N6S5_MAGO7
biological_process	GO:0006974	cellular response to DNA damage stimulus	1	9	0.111111	0.702222	0.395225	1	1	G4MTA2_MAGO7
biological_process	GO:0007059	chromosome segregation	1	13	0.0769231	0.671396	0.484183	1	1	G4N8V4_MAGO7
biological_process	GO:0007052	mitotic spindle organization	1	3	0.333333	0.746926	0.639078	1	1	G4NF04_MAGO7
molecular_function	GO:0031176	endo-1,4-beta-xylanase activity	1	11	0.0909091	0.774376	0.609347	1	1	G4NBN8_MAGO7
biological_process	GO:0045493	xylan catabolic process	1	29	0.0344828	0.259319	0.932396	1	1	G4NBN8_MAGO7
biological_process	GO:0006402	mRNA catabolic process	1	3	0.333333	0.999916	0.000362356	1	0.136	G4MUF8_MAGO7
biological_process	GO:0106035	protein maturation by [4Fe-4S] cluster transfer	1	3	0.333333	0.978018	0.242398	1	1	G4N1C1_MAGO7
biological_process	GO:0051321	meiotic cell cycle	1	5	0.2	0.465098	0.74614	1	1	G4N9J8_MAGO7
cellular_component	GO:0005840	ribosome	1	92	0.0108696	8.65544e-06	0.999999	0	1	G4NC03_MAGO7
biological_process	GO:0051276	chromosome organization	1	4	0.25	0.47698	0.624135	1	1	G4N8V4_MAGO7
molecular_function	GO:0008171	O-methyltransferase activity	1	18	0.0555556	0.359764	0.891925	1	1	G4NCB2_MAGO7
biological_process	GO:0006665	sphingolipid metabolic process	1	6	0.166667	0.767358	0.510498	1	1	G4MKJ1_MAGO7
molecular_function	GO:0030145	manganese ion binding	1	8	0.125	0.865371	0.495097	1	1	G4N7I3_MAGO7
biological_process	GO:0030242	autophagy of peroxisome	1	3	0.333333	0.934963	0.370483	1	1	G4NFW8_MAGO7
cellular_component	GO:0061908	phagophore	1	2	0.5	0.991637	0.174741	1	1	ATG1_MAGO7
biological_process	GO:0044805	late nucleophagy	1	2	0.5	0.992217	0.168926	1	1	ATG1_MAGO7
biological_process	GO:0034727	piecemeal microautophagy of the nucleus	1	2	0.5	0.978018	0.242398	1	1	ATG1_MAGO7
cellular_component	GO:0097635	extrinsic component of autophagosome membrane	1	1	1	1	0.0915524	1	1	ATG1_MAGO7
cellular_component	GO:0120095	vacuole-isolation membrane contact site	1	1	1	1	0.0915524	1	1	ATG1_MAGO7
biological_process	GO:0075016	appressorium formation	1	3	0.333333	0.908025	0.426184	1	1	ATG1_MAGO7
biological_process	GO:0048102	autophagic cell death	1	2	0.5	0.992217	0.168926	1	1	ATG1_MAGO7
biological_process	GO:0120164	conidium germination	1	1	1	1	0.0883546	1	1	ATG1_MAGO7
biological_process	GO:0075307	positive regulation of conidium formation	1	1	1	1	0.0883546	1	1	ATG1_MAGO7
biological_process	GO:0009847	spore germination	1	1	1	1	0.0883546	1	1	ATG1_MAGO7
biological_process	GO:0016239	positive regulation of macroautophagy	1	4	0.25	0.878541	0.476972	1	1	G4MTA2_MAGO7
cellular_component	GO:0051285	cell cortex of cell tip	1	10	0.1	0.733348	0.652651	1	1	MYO1_MAGO7
cellular_component	GO:0031097	medial cortex	1	6	0.166667	0.87096	0.489618	1	1	MYO1_MAGO7
cellular_component	GO:0045160	myosin I complex	1	1	1	1	0.0915524	1	1	MYO1_MAGO7
cellular_component	GO:0044853	plasma membrane raft	1	1	1	1	0.0915524	1	1	MYO1_MAGO7
molecular_function	GO:0071933	Arp2/3 complex binding	1	2	0.5	0.993319	0.156966	1	1	MYO1_MAGO7
molecular_function	GO:0000146	microfilament motor activity	1	1	1	1	0.0818233	1	1	MYO1_MAGO7
biological_process	GO:0044855	plasma membrane raft distribution	1	1	1	1	0.0883546	1	1	MYO1_MAGO7
biological_process	GO:0030838	positive regulation of actin filament polymerization	1	1	1	0.645384	0.726819	1	1	MYO1_MAGO7
biological_process	GO:2000601	positive regulation of Arp2/3 complex-mediated actin nucleation	1	4	0.25	0.95859	0.309394	1	1	MYO1_MAGO7
biological_process	GO:0032436	positive regulation of proteasomal ubiquitin-dependent protein catabolic process	1	3	0.333333	0.978018	0.242398	1	1	G4MUH5_MAGO7
cellular_component	GO:0005952	cAMP-dependent protein kinase complex	1	2	0.5	0.991637	0.174741	1	1	G4N7T3_MAGO7
molecular_function	GO:0051287	NAD binding	1	33	0.030303	0.289497	0.88598	1	1	G4MUJ2_MAGO7
biological_process	GO:0048478	replication fork protection	1	4	0.25	0.95859	0.309394	1	1	G4N814_MAGO7
biological_process	GO:0016226	iron-sulfur cluster assembly	1	13	0.0769231	0.837548	0.419681	1	1	G4NDU1_MAGO7
biological_process	GO:0006891	intra-Golgi vesicle-mediated transport	1	8	0.125	0.847169	0.523277	1	1	G4MLK4_MAGO7
biological_process	GO:0006486	protein glycosylation	1	27	0.037037	0.102739	0.979951	1	1	G4MQ31_MAGO7
biological_process	GO:0006099	tricarboxylic acid cycle	1	18	0.0555556	0.51875	0.811637	1	1	G4MUJ2_MAGO7
molecular_function	GO:0004100	chitin synthase activity	1	7	0.142857	0.893449	0.450039	1	1	G4N1B2_MAGO7
molecular_function	GO:0051537	2 iron, 2 sulfur cluster binding	1	18	0.0555556	0.559944	0.785432	1	1	G4N1C1_MAGO7
molecular_function	GO:0051539	4 iron, 4 sulfur cluster binding	1	30	0.0333333	0.282864	0.923329	1	1	G4MK85_MAGO7
molecular_function	GO:0030544	Hsp70 protein binding	1	5	0.2	0.943428	0.347532	1	1	G4N1N5_MAGO7
biological_process	GO:0009116	nucleoside metabolic process	1	29	0.0344828	0.352371	0.851843	1	1	G4MWH7_MAGO7
cellular_component	GO:0016272	prefoldin complex	1	6	0.166667	0.90207	0.438107	1	1	G4MNI8_MAGO7
molecular_function	GO:0016628	oxidoreductase activity, acting on the CH-CH group of donors, NAD or NADP as acceptor	1	5	0.2	0.862423	0.381138	1	1	G4MW05_MAGO7
molecular_function	GO:0008131	primary amine oxidase activity	1	7	0.142857	0.893449	0.450039	1	1	G5EH07_MAGO7
molecular_function	GO:0048038	quinone binding	1	10	0.1	0.774376	0.609347	1	1	G5EH07_MAGO7
biological_process	GO:0009308	amine metabolic process	1	7	0.142857	0.91617	0.211441	1	1	G5EH07_MAGO7
biological_process	GO:0006623	protein targeting to vacuole	1	9	0.111111	0.746926	0.639078	1	1	G4MXK4_MAGO7
biological_process	GO:0043162	ubiquitin-dependent protein catabolic process via the multivesicular body sorting pathway	1	2	0.5	0.908025	0.426184	1	1	G4MUH5_MAGO7
biological_process	GO:0009058	biosynthetic process	1	23	0.0434783	0.715485	0.328839	1	1	G4MX94_MAGO7
cellular_component	GO:0031515	tRNA (m1A) methyltransferase complex	1	3	0.333333	0.976434	0.250329	1	1	G4N2N9_MAGO7
cellular_component	GO:0000812	Swr1 complex	1	5	0.2	0.930597	0.381411	1	1	G4MXK8_MAGO7
biological_process	GO:0043486	histone exchange	1	8	0.125	0.746926	0.639078	1	1	G4MXK8_MAGO7
cellular_component	GO:0000439	transcription factor TFIIH core complex	1	7	0.142857	0.87096	0.489618	1	1	G4ML50_MAGO7
molecular_function	GO:0003935	GTP cyclohydrolase II activity	1	2	0.5	0.993319	0.156966	1	1	G4N9R2_MAGO7
molecular_function	GO:0043531	ADP binding	1	8	0.125	0.865371	0.495097	1	1	G4MWH7_MAGO7
molecular_function	GO:0030619	U1 snRNA binding	1	3	0.333333	0.981046	0.225971	1	1	G4N5D4_MAGO7
biological_process	GO:0007064	mitotic sister chromatid cohesion	1	8	0.125	0.712824	0.671069	1	1	G4N221_MAGO7
cellular_component	GO:0000145	exocyst	1	8	0.125	0.837977	0.536417	1	1	G4N971_MAGO7
biological_process	GO:0032220	plasma membrane fusion involved in cytogamy	1	5	0.2	0.934963	0.370483	1	1	G4N6M5_MAGO7
cellular_component	GO:0000818	nuclear MIS12/MIND complex	1	2	0.5	0.991637	0.174741	1	1	G4MTB0_MAGO7
molecular_function	GO:0140078	class I DNA-(apurinic or apyrimidinic site) endonuclease activity	1	3	0.333333	0.981046	0.225971	1	1	G4NCQ8_MAGO7
molecular_function	GO:0016620	oxidoreductase activity, acting on the aldehyde or oxo group of donors, NAD or NADP as acceptor	1	17	0.0588235	0.339117	0.900811	1	1	G4NFL6_MAGO7
cellular_component	GO:0051286	cell tip	1	5	0.2	0.962295	0.10701	1	1	G5EHW2_MAGO7
biological_process	GO:0006541	glutamine metabolic process	1	13	0.0769231	0.580319	0.773145	1	1	G4MVB1_MAGO7
cellular_component	GO:1902494	catalytic complex	1	2	0.5	0.832428	0.221873	1	1	G4ML72_MAGO7
cellular_component	GO:1990904	ribonucleoprotein complex	1	6	0.166667	0.020716	0.989693	0.453	1	G4ML72_MAGO7
biological_process	GO:0034470	ncRNA processing	1	2	0.5	0.273238	0.810338	1	1	G4ML72_MAGO7
molecular_function	GO:0004190	aspartic-type endopeptidase activity	1	23	0.0434783	0.427592	0.860212	1	1	G4MP93_MAGO7
biological_process	GO:0006450	regulation of translational fidelity	1	5	0.2	0.847169	0.523277	1	1	G4NC81_MAGO7
cellular_component	GO:0000324	fungal-type vacuole	1	6	0.166667	0.310376	0.875382	1	1	G4N7T3_MAGO7
biological_process	GO:0070987	error-free translesion synthesis	1	5	0.2	0.934963	0.370483	1	1	G5EH81_MAGO7
molecular_function	GO:0000293	ferric-chelate reductase activity	1	12	0.0833333	0.742986	0.641378	1	1	G4NCU9_MAGO7
biological_process	GO:0008608	attachment of spindle microtubules to kinetochore	1	7	0.142857	0.899413	0.321102	1	1	G4NDQ7_MAGO7
biological_process	GO:0065003	protein-containing complex assembly	1	4	0.25	0.186503	0.877694	1	1	G4N8S8_MAGO7
biological_process	GO:0006637	acyl-CoA metabolic process	1	3	0.333333	0.489502	0.828367	1	1	G4N4D1_MAGO7
molecular_function	GO:0016531	copper chaperone activity	1	2	0.5	0.993319	0.156966	1	1	G5EHG1_MAGO7
biological_process	GO:0006878	cellular copper ion homeostasis	1	11	0.0909091	0.746926	0.639078	1	1	G5EHG1_MAGO7
biological_process	GO:0008535	respiratory chain complex IV assembly	1	1	1	0.961616	0.18553	1	1	G5EHG1_MAGO7
molecular_function	GO:0004169	dolichyl-phosphate-mannose-protein mannosyltransferase activity	1	3	0.333333	0.981046	0.225971	1	1	G5EHM5_MAGO7
biological_process	GO:0071555	cell wall organization	1	14	0.0714286	0.838628	0.332636	1	1	G4N1B2_MAGO7
cellular_component	GO:0031083	BLOC-1 complex	1	2	0.5	0.991637	0.174741	1	1	G4N9V4_MAGO7
biological_process	GO:0048280	vesicle fusion with Golgi apparatus	1	4	0.25	0.95859	0.309394	1	1	G4NC71_MAGO7
cellular_component	GO:0048188	Set1C/COMPASS complex	1	6	0.166667	0.90207	0.438107	1	1	G5EI22_MAGO7
molecular_function	GO:0010181	FMN binding	1	23	0.0434783	0.427592	0.860212	1	1	G4N585_MAGO7
cellular_component	GO:0030915	Smc5-Smc6 complex	1	5	0.2	0.930597	0.381411	1	1	G4N7F9_MAGO7
biological_process	GO:0007076	mitotic chromosome condensation	1	4	0.25	0.908025	0.426184	1	1	G4MV38_MAGO7
biological_process	GO:0035103	sterol regulatory element binding protein cleavage	1	2	0.5	0.992217	0.168926	1	1	G4MZF4_MAGO7
biological_process	GO:0033314	mitotic DNA replication checkpoint signaling	1	4	0.25	0.95859	0.309394	1	1	G4N814_MAGO7
biological_process	GO:0006479	protein methylation	1	7	0.142857	0.51875	0.811637	1	1	G4MTG8_MAGO7
cellular_component	GO:0030688	preribosome, small subunit precursor	1	10	0.1	0.733348	0.652651	1	1	G4NCA1_MAGO7
biological_process	GO:0031505	fungal-type cell wall organization	1	10	0.1	0.932103	0.208583	1	1	G4MNE6_MAGO7
molecular_function	GO:0050072	m7G(5')pppN diphosphatase activity	1	3	0.333333	0.981046	0.225971	1	1	G4N7I3_MAGO7
molecular_function	GO:0030246	carbohydrate binding	1	27	0.037037	0.106942	0.967876	0.999	1	G4MQ58_MAGO7
cellular_component	GO:0005680	anaphase-promoting complex	1	10	0.1	0.768704	0.617561	1	1	G4N6S5_MAGO7
biological_process	GO:0070682	proteasome regulatory particle assembly	1	9	0.111111	0.81447	0.565496	1	1	G4MRM8_MAGO7
cellular_component	GO:0030132	clathrin coat of coated pit	1	2	0.5	0.993379	0.0694027	1	0.999	G4N0Z8_MAGO7
cellular_component	GO:0030130	clathrin coat of trans-Golgi network vesicle	1	2	0.5	0.993379	0.0694027	1	0.999	G4N0Z8_MAGO7
cellular_component	GO:0071439	clathrin complex	1	1	1	1	0.0915524	1	1	G4N0Z8_MAGO7
molecular_function	GO:0032051	clathrin light chain binding	1	1	1	1	0.0818233	1	1	G4N0Z8_MAGO7
cellular_component	GO:0042729	DASH complex	1	9	0.111111	0.803722	0.578934	1	1	G4NDQ7_MAGO7
molecular_function	GO:0004326	tetrahydrofolylpolyglutamate synthase activity	1	4	0.25	0.964136	0.28934	1	1	G4MZH5_MAGO7
biological_process	GO:0006730	one-carbon metabolic process	1	12	0.0833333	0.549046	0.793282	1	1	G4MZH5_MAGO7
biological_process	GO:0000278	mitotic cell cycle	1	8	0.125	0.757668	0.355988	1	1	G4N8V4_MAGO7
molecular_function	GO:0016429	tRNA (adenine-N1-)-methyltransferase activity	1	2	0.5	0.993319	0.156966	1	1	G4N2N9_MAGO7
biological_process	GO:0044550	secondary metabolite biosynthetic process	1	15	0.0666667	0.159195	0.964844	1	1	G4NED1_MAGO7
biological_process	GO:0016482	cytosolic transport	1	2	0.5	0.970653	0.120015	1	1	G4MMY1_MAGO7
molecular_function	GO:0016791	phosphatase activity	1	13	0.0769231	0.504174	0.647753	1	1	G4NLW2_MAGO7
biological_process	GO:0061817	endoplasmic reticulum-plasma membrane tethering	1	3	0.333333	0.978018	0.242398	1	1	G4NFC0_MAGO7
biological_process	GO:0000027	ribosomal large subunit assembly	1	13	0.0769231	0.678898	0.700233	1	1	G4N7L9_MAGO7
molecular_function	GO:0050614	delta24-sterol reductase activity	1	3	0.333333	0.981046	0.225971	1	1	G4NCT5_MAGO7
biological_process	GO:0008655	pyrimidine-containing compound salvage	1	2	0.5	0.978018	0.242398	1	1	G4MRK8_MAGO7
biological_process	GO:0016573	histone acetylation	1	9	0.111111	0.983293	0.082564	1	1	G4N1E0_MAGO7
cellular_component	GO:0016514	SWI/SNF complex	1	2	0.5	0.991637	0.174741	1	1	G4N7K9_MAGO7
molecular_function	GO:0070403	NAD+ binding	1	11	0.0909091	0.774376	0.609347	1	1	G4NI80_MAGO7
biological_process	GO:0006751	glutathione catabolic process	1	6	0.166667	0.908025	0.426184	1	1	G4MQ98_MAGO7
biological_process	GO:0000462	maturation of SSU-rRNA from tricistronic rRNA transcript (SSU-rRNA, 5.8S rRNA, LSU-rRNA)	1	9	0.111111	0.544476	0.722645	1	1	G4NHA6_MAGO7
molecular_function	GO:0031418	L-ascorbic acid binding	1	6	0.166667	0.919653	0.400969	1	1	G4NJ47_MAGO7
biological_process	GO:0019222	regulation of metabolic process	1	1	1	0.999986	3.16206e-05	1	0.013	G4N857_MAGO7
cellular_component	GO:0005665	RNA polymerase II, core complex	1	11	0.0909091	0.733348	0.652651	1	1	G4N973_MAGO7
biological_process	GO:0009968	negative regulation of signal transduction	1	1	1	0.767358	0.510498	1	1	G4MSZ4_MAGO7
biological_process	GO:0019346	transsulfuration	1	8	0.125	0.847169	0.523277	1	1	G4MYI6_MAGO7
molecular_function	GO:0017116	single-stranded DNA helicase activity	1	7	0.142857	0.8359	0.536472	1	1	G4MK85_MAGO7
biological_process	GO:0033567	DNA replication, Okazaki fragment processing	1	2	0.5	0.978018	0.242398	1	1	G4MK85_MAGO7
cellular_component	GO:0030121	AP-1 adaptor complex	1	3	0.333333	0.976434	0.250329	1	1	G4MMY1_MAGO7
molecular_function	GO:0035615	clathrin adaptor activity	1	3	0.333333	0.981046	0.225971	1	1	G4N1S9_MAGO7
molecular_function	GO:0008534	oxidized purine nucleobase lesion DNA N-glycosylase activity	1	1	1	1	0.0818233	1	1	G4NCQ8_MAGO7
biological_process	GO:0006285	base-excision repair, AP site formation	1	5	0.2	0.934963	0.370483	1	1	G4NCQ8_MAGO7
biological_process	GO:0002098	tRNA wobble uridine modification	1	13	0.0769231	0.489502	0.828367	1	1	G4N648_MAGO7
cellular_component	GO:0030289	protein phosphatase 4 complex	1	2	0.5	0.991637	0.174741	1	1	G4MSF0_MAGO7
biological_process	GO:0000724	double-strand break repair via homologous recombination	1	5	0.2	0.717983	0.56566	1	1	G4N7F9_MAGO7
biological_process	GO:0000480	endonucleolytic cleavage in 5'-ETS of tricistronic rRNA transcript (SSU-rRNA, 5.8S rRNA, LSU-rRNA)	1	14	0.0714286	0.645384	0.726819	1	1	G4NCA1_MAGO7
biological_process	GO:0000447	endonucleolytic cleavage in ITS1 to separate SSU-rRNA from 5.8S rRNA and LSU-rRNA from tricistronic rRNA transcript (SSU-rRNA, 5.8S rRNA, LSU-rRNA)	1	17	0.0588235	0.549046	0.793282	1	1	G4NCA1_MAGO7
biological_process	GO:0000472	endonucleolytic cleavage to generate mature 5'-end of SSU-rRNA from (SSU-rRNA, 5.8S rRNA, LSU-rRNA)	1	15	0.0666667	0.612473	0.751054	1	1	G4NCA1_MAGO7
molecular_function	GO:0003730	mRNA 3'-UTR binding	1	1	1	0.993319	0.156966	1	1	G4MY97_MAGO7
molecular_function	GO:0048027	mRNA 5'-UTR binding	1	1	1	1	0.0818233	1	1	G4MY97_MAGO7
molecular_function	GO:0004540	ribonuclease activity	1	3	0.333333	0.930697	0.167372	1	1	G4MY97_MAGO7
molecular_function	GO:0000900	translation repressor activity, mRNA regulatory element binding	1	1	1	1	0.0818233	1	1	G4MY97_MAGO7
biological_process	GO:0008298	intracellular mRNA localization	1	4	0.25	0.95859	0.309394	1	1	G4MY97_MAGO7
biological_process	GO:1903450	regulation of G1 to G0 transition	1	1	1	1	0.0883546	1	1	G4MY97_MAGO7
biological_process	GO:0000747	conjugation with cellular fusion	1	2	0.5	0.988852	0.0377442	1	1	G4MUV9_MAGO7
molecular_function	GO:0015450	protein-transporting ATPase activity	1	2	0.5	0.993319	0.156966	1	1	G4ND44_MAGO7
cellular_component	GO:0031981	nuclear lumen	1	3	0.333333	0.475591	0.610302	1	1	G4NB99_MAGO7
biological_process	GO:0033617	mitochondrial cytochrome c oxidase assembly	1	8	0.125	0.847169	0.523277	1	1	G4NHG3_MAGO7
cellular_component	GO:0061617	MICOS complex	1	3	0.333333	0.976434	0.250329	1	1	G4NBT2_MAGO7
biological_process	GO:0042407	cristae formation	1	3	0.333333	0.978018	0.242398	1	1	G4NBT2_MAGO7
cellular_component	GO:0000148	1,3-beta-D-glucan synthase complex	1	1	1	1	0.0915524	1	1	G4NDY8_MAGO7
molecular_function	GO:0003843	1,3-beta-D-glucan synthase activity	1	1	1	1	0.0818233	1	1	G4NDY8_MAGO7
biological_process	GO:0006075	(1->3)-beta-D-glucan biosynthetic process	1	1	1	1	0.0883546	1	1	G4NDY8_MAGO7
cellular_component	GO:0044695	Dsc E3 ubiquitin ligase complex	1	1	1	1	0.0915524	1	1	G4MZF4_MAGO7
cellular_component	GO:0005778	peroxisomal membrane	1	10	0.1	0.530076	0.805115	1	1	G4NCH6_MAGO7
biological_process	GO:0016560	protein import into peroxisome matrix, docking	1	4	0.25	0.95859	0.309394	1	1	G4NCH6_MAGO7
biological_process	GO:0000727	double-strand break repair via break-induced replication	1	10	0.1	0.780921	0.603987	1	1	G4N814_MAGO7
biological_process	GO:1902975	mitotic DNA replication initiation	1	4	0.25	0.95859	0.309394	1	1	G4N814_MAGO7
molecular_function	GO:0004521	endoribonuclease activity	1	9	0.111111	0.663988	0.618613	1	1	G4MME3_MAGO7
molecular_function	GO:0004518	nuclease activity	1	5	0.2	0.657027	0.498326	1	1	G4ND24_MAGO7
biological_process	GO:1901566	organonitrogen compound biosynthetic process	1	7	0.142857	2.62219e-08	1	0	1	G4N2U3_MAGO7
molecular_function	GO:0019829	ATPase-coupled cation transmembrane transporter activity	1	8	0.125	0.339117	0.900811	1	1	G4N3A4_MAGO7
cellular_component	GO:0000151	ubiquitin ligase complex	1	2	0.5	0.863987	0.327082	1	1	G4MUH5_MAGO7
biological_process	GO:0042256	mature ribosome assembly	1	4	0.25	0.95859	0.309394	1	1	G4MNZ9_MAGO7
cellular_component	GO:0005682	U5 snRNP	1	8	0.125	0.837977	0.536417	1	1	G4N5D4_MAGO7
molecular_function	GO:0061133	endopeptidase activator activity	1	3	0.333333	0.981046	0.225971	1	1	G4N5F1_MAGO7
molecular_function	GO:0070628	proteasome binding	1	6	0.166667	0.919653	0.400969	1	1	G4MUE8_MAGO7
biological_process	GO:0070534	protein K63-linked ubiquitination	1	2	0.5	0.992217	0.168926	1	1	G4N5Z2_MAGO7
biological_process	GO:0006366	transcription by RNA polymerase II	1	6	0.166667	0.999938	0.000171452	1	0.059	G4N973_MAGO7
biological_process	GO:0071596	ubiquitin-dependent protein catabolic process via the N-end rule pathway	1	3	0.333333	0.978018	0.242398	1	1	G4MPW7_MAGO7
biological_process	GO:0015693	magnesium ion transport	1	5	0.2	0.908025	0.426184	1	1	G4N7T2_MAGO7
cellular_component	GO:0005956	protein kinase CK2 complex	1	3	0.333333	0.976434	0.250329	1	1	G4NCZ6_MAGO7
biological_process	GO:0018105	peptidyl-serine phosphorylation	1	3	0.333333	0.978018	0.242398	1	1	G4N814_MAGO7
biological_process	GO:0018107	peptidyl-threonine phosphorylation	1	3	0.333333	0.978018	0.242398	1	1	G4N814_MAGO7
cellular_component	GO:0030904	retromer complex	1	3	0.333333	0.95571	0.319009	1	1	G4MZL7_MAGO7
biological_process	GO:0043983	histone H4-K12 acetylation	1	1	1	1	0.0883546	1	1	G4MXK8_MAGO7
biological_process	GO:0043981	histone H4-K5 acetylation	1	1	1	1	0.0883546	1	1	G4MXK8_MAGO7
biological_process	GO:0043982	histone H4-K8 acetylation	1	1	1	1	0.0883546	1	1	G4MXK8_MAGO7
biological_process	GO:0071930	negative regulation of transcription involved in G1/S transition of mitotic cell cycle	1	1	1	1	0.0883546	1	1	G4NI33_MAGO7
molecular_function	GO:0016788	hydrolase activity, acting on ester bonds	1	13	0.0769231	0.351787	0.728768	1	1	G4MNY6_MAGO7
cellular_component	GO:0005802	trans-Golgi network	1	6	0.166667	0.90207	0.438107	1	1	G4MVB3_MAGO7
biological_process	GO:0030037	actin filament reorganization involved in cell cycle	1	1	1	1	0.0883546	1	1	G4MVB3_MAGO7
biological_process	GO:0043001	Golgi to plasma membrane protein transport	1	6	0.166667	0.878541	0.476972	1	1	G4MVB3_MAGO7
molecular_function	GO:0004534	5'-3' exoribonuclease activity	1	2	0.5	0.993319	0.156966	1	1	G4MV17_MAGO7
molecular_function	GO:0003747	translation release factor activity	1	5	0.2	0.943428	0.347532	1	1	G4NC31_MAGO7
molecular_function	GO:0036374	glutathione hydrolase activity	1	4	0.25	0.964136	0.28934	1	1	G4MQ98_MAGO7
biological_process	GO:0051641	cellular localization	1	1	1	0.93876	0.0891082	1	1	G4N9V4_MAGO7
molecular_function	GO:0016603	glutaminyl-peptide cyclotransferase activity	1	2	0.5	0.993319	0.156966	1	1	G4MWU4_MAGO7
cellular_component	GO:0000307	cyclin-dependent protein kinase holoenzyme complex	1	2	0.5	0.997159	0.04429	1	0.997	G4MNC3_MAGO7
molecular_function	GO:0000993	RNA polymerase II complex binding	1	2	0.5	0.964136	0.28934	1	1	G4N654_MAGO7
biological_process	GO:0006370	7-methylguanosine mRNA capping	1	3	0.333333	0.978018	0.242398	1	1	G4N4L3_MAGO7
biological_process	GO:0070816	phosphorylation of RNA polymerase II C-terminal domain	1	6	0.166667	0.878541	0.476972	1	1	G4ML50_MAGO7
biological_process	GO:0032956	regulation of actin cytoskeleton organization	1	5	0.2	0.56855	0.703565	1	1	G4MUH5_MAGO7
cellular_component	GO:0000775	chromosome, centromeric region	1	10	0.1	0.315495	0.849538	1	1	G4N814_MAGO7
molecular_function	GO:0097157	pre-mRNA intronic binding	1	2	0.5	0.993319	0.156966	1	1	G4N5D4_MAGO7
molecular_function	GO:0140326	ATPase-coupled intramembrane lipid transporter activity	1	4	0.25	0.943428	0.347532	1	1	G4NJ22_MAGO7
biological_process	GO:0034605	cellular response to heat	1	4	0.25	0.908025	0.426184	1	1	G4N8C1_MAGO7
molecular_function	GO:0009982	pseudouridine synthase activity	1	7	0.142857	0.893449	0.450039	1	1	G4MKS9_MAGO7
molecular_function	GO:0005516	calmodulin binding	1	5	0.2	0.943428	0.347532	1	1	G4N0F8_MAGO7
biological_process	GO:0043968	histone H2A acetylation	1	1	1	1	0.0883546	1	1	G4MYA8_MAGO7
biological_process	GO:0043967	histone H4 acetylation	1	1	1	1	0.00778319	1	0.988	G4MYA8_MAGO7
molecular_function	GO:0070577	lysine-acetylated histone binding	1	2	0.5	0.993319	0.156966	1	1	G4N7K9_MAGO7
molecular_function	GO:0015140	malate transmembrane transporter activity	1	3	0.333333	0.981046	0.225971	1	1	G4MY83_MAGO7
biological_process	GO:0032511	late endosome to vacuole transport via multivesicular body sorting pathway	1	7	0.142857	0.712824	0.671069	1	1	G4MUH5_MAGO7
molecular_function	GO:0004479	methionyl-tRNA formyltransferase activity	1	1	1	1	0.0818233	1	1	G4NEK1_MAGO7
cellular_component	GO:0016602	CCAAT-binding factor complex	1	2	0.5	0.991637	0.174741	1	1	G4NC05_MAGO7
cellular_component	GO:0035339	SPOTS complex	1	2	0.5	0.991637	0.174741	1	1	G4N522_MAGO7
molecular_function	GO:0004758	serine C-palmitoyltransferase activity	1	1	1	1	0.0818233	1	1	G4N522_MAGO7
biological_process	GO:0030148	sphingolipid biosynthetic process	1	4	0.25	0.847169	0.523277	1	1	G4N522_MAGO7
molecular_function	GO:0016300	tRNA (uracil) methyltransferase activity	1	1	1	0.981046	0.225971	1	1	G4N648_MAGO7
molecular_function	GO:0019887	protein kinase regulator activity	1	2	0.5	0.946086	0.178187	1	1	G4NCZ6_MAGO7
biological_process	GO:0031503	protein-containing complex localization	1	3	0.333333	0.446384	0.760228	1	1	G4N814_MAGO7
molecular_function	GO:0005337	nucleoside transmembrane transporter activity	1	2	0.5	0.993319	0.156966	1	1	G4N508_MAGO7
cellular_component	GO:0005955	calcineurin complex	1	2	0.5	0.991637	0.174741	1	1	G4MNE6_MAGO7
cellular_component	GO:0005675	transcription factor TFIIH holo complex	1	6	0.166667	0.87096	0.489618	1	1	G4ML50_MAGO7
cellular_component	GO:0030122	AP-2 adaptor complex	1	3	0.333333	0.976434	0.250329	1	1	G4N1S9_MAGO7
biological_process	GO:0072583	clathrin-dependent endocytosis	1	3	0.333333	0.978018	0.242398	1	1	G4N1S9_MAGO7
molecular_function	GO:0061608	nuclear import signal receptor activity	1	2	0.5	0.993319	0.156966	1	1	G4MZS0_MAGO7
biological_process	GO:0046822	regulation of nucleocytoplasmic transport	1	2	0.5	0.999223	0.0111615	1	0.995	G4MTA2_MAGO7
biological_process	GO:0005979	regulation of glycogen biosynthetic process	1	1	1	1	0.00778319	1	0.988	G4MNC3_MAGO7
biological_process	GO:0005981	regulation of glycogen catabolic process	1	1	1	0.992217	0.168926	1	1	G4MNC3_MAGO7
biological_process	GO:0006379	mRNA cleavage	1	6	0.166667	0.878541	0.476972	1	1	G4N654_MAGO7
biological_process	GO:0006378	mRNA polyadenylation	1	6	0.166667	0.878541	0.476972	1	1	G4N654_MAGO7
molecular_function	GO:0004407	histone deacetylase activity	1	2	0.5	0.943428	0.347532	1	1	G4N4X5_MAGO7
cellular_component	GO:0000796	condensin complex	1	3	0.333333	0.976434	0.250329	1	1	G4MV38_MAGO7
molecular_function	GO:0008138	protein tyrosine/serine/threonine phosphatase activity	1	8	0.125	0.865371	0.495097	1	1	G4N549_MAGO7
biological_process	GO:0019236	response to pheromone	1	1	1	0.996859	0.0273433	1	1	G4N845_MAGO7
biological_process	GO:0070262	peptidyl-serine dephosphorylation	1	5	0.2	0.934963	0.370483	1	1	G4N8C1_MAGO7
biological_process	GO:0000390	spliceosomal complex disassembly	1	2	0.5	0.992217	0.168926	1	1	G4NHA6_MAGO7
cellular_component	GO:0000814	ESCRT II complex	1	3	0.333333	0.976434	0.250329	1	1	G4NCT4_MAGO7
molecular_function	GO:0008139	nuclear localization sequence binding	1	2	0.5	0.993319	0.156966	1	1	G4NIB9_MAGO7
molecular_function	GO:0004723	calcium-dependent protein serine/threonine phosphatase activity	1	1	1	0.993319	0.156966	1	1	G4MNE6_MAGO7
molecular_function	GO:0008597	calcium-dependent protein serine/threonine phosphatase regulator activity	1	1	1	1	0.0818233	1	1	G4MNE6_MAGO7
biological_process	GO:0000754	adaptation of signaling pathway by response to pheromone involved in conjugation with cellular fusion	1	1	1	1	0.0883546	1	1	G4MNE6_MAGO7
biological_process	GO:0006873	cellular ion homeostasis	1	2	0.5	0.457122	0.729604	1	1	G4MNE6_MAGO7
biological_process	GO:0046856	phosphatidylinositol dephosphorylation	1	7	0.142857	0.878541	0.476972	1	1	G4NLW2_MAGO7
biological_process	GO:0000041	transition metal ion transport	1	7	0.142857	0.767358	0.510498	1	1	G4NCU9_MAGO7
molecular_function	GO:0003913	DNA photolyase activity	1	1	1	1	0.0818233	1	1	G4NL14_MAGO7
biological_process	GO:0018298	protein-chromophore linkage	1	3	0.333333	0.978018	0.242398	1	1	G4NL14_MAGO7
cellular_component	GO:0005876	spindle microtubule	1	2	0.5	0.95571	0.319009	1	1	G4NDQ7_MAGO7
biological_process	GO:0016567	protein ubiquitination	1	8	0.125	0.89194	0.282017	1	1	G4MPR1_MAGO7
cellular_component	GO:0061672	glutathione hydrolase complex	1	1	1	1	0.0915524	1	1	G4MQ98_MAGO7
molecular_function	GO:0051536	iron-sulfur cluster binding	1	7	0.142857	0.359276	0.820702	1	1	G4NDU1_MAGO7
biological_process	GO:0044571	[2Fe-2S] cluster assembly	1	3	0.333333	0.978018	0.242398	1	1	G4N1C1_MAGO7
biological_process	GO:0097502	mannosylation	1	4	0.25	0.95859	0.309394	1	1	G4MQ31_MAGO7
molecular_function	GO:0015297	antiporter activity	1	4	0.25	0.899263	0.31975	1	1	G4MKF0_MAGO7
molecular_function	GO:0008318	protein prenyltransferase activity	1	3	0.333333	0.919653	0.400969	1	1	G4MNG3_MAGO7
biological_process	GO:0018342	protein prenylation	1	2	0.5	0.934963	0.370483	1	1	G4MNG3_MAGO7
molecular_function	GO:0003864	3-methyl-2-oxobutanoate hydroxymethyltransferase activity	1	1	1	1	0.0818233	1	1	G4NB94_MAGO7
biological_process	GO:0015940	pantothenate biosynthetic process	1	5	0.2	0.934963	0.370483	1	1	G4NB94_MAGO7
biological_process	GO:0043488	regulation of mRNA stability	1	2	0.5	0.999948	0.000359625	1	0.134	G4N7X5_MAGO7
biological_process	GO:0009966	regulation of signal transduction	1	2	0.5	0.652231	0.553616	1	1	G4MTF6_MAGO7
cellular_component	GO:0030427	site of polarized growth	1	2	0.5	0.999163	0.00337483	1	0.361	G4NFW8_MAGO7
cellular_component	GO:0000112	nucleotide-excision repair factor 3 complex	1	4	0.25	0.95571	0.319009	1	1	G4ML50_MAGO7
biological_process	GO:0016043	cellular component organization	1	4	0.25	0.731773	0.321694	1	1	G4NDT9_MAGO7
molecular_function	GO:0015038	glutathione disulfide oxidoreductase activity	1	2	0.5	0.943428	0.347532	1	1	G4N1C1_MAGO7
molecular_function	GO:0097573	glutathione oxidoreductase activity	1	4	0.25	0.964136	0.28934	1	1	G4N1C1_MAGO7
biological_process	GO:0106034	protein maturation by [2Fe-2S] cluster transfer	1	1	1	1	0.0883546	1	1	G4N1C1_MAGO7
biological_process	GO:0006970	response to osmotic stress	1	3	0.333333	0.917436	0.287176	1	1	G4N1C1_MAGO7
cellular_component	GO:0016459	myosin complex	1	4	0.25	0.987653	0.0979303	1	1	G4NKK3_MAGO7
molecular_function	GO:0003774	cytoskeletal motor activity	1	5	0.2	0.990297	0.0447227	1	1	G4NKK3_MAGO7
biological_process	GO:0043087	regulation of GTPase activity	1	5	0.2	0.712824	0.671069	1	1	G4MV33_MAGO7
cellular_component	GO:0031932	TORC2 complex	1	5	0.2	0.930597	0.381411	1	1	G4N7N3_MAGO7
molecular_function	GO:0043399	tRNA A64-2'-O-ribosylphosphate transferase activity	1	1	1	1	0.0818233	1	1	G4MYV2_MAGO7
biological_process	GO:0019988	charged-tRNA amino acid modification	1	1	1	1	0.0883546	1	1	G4MYV2_MAGO7
biological_process	GO:0000209	protein polyubiquitination	1	4	0.25	0.988839	0.0919755	1	1	G4MUH5_MAGO7
molecular_function	GO:0004088	carbamoyl-phosphate synthase (glutamine-hydrolyzing) activity	1	3	0.333333	0.981046	0.225971	1	1	G4MVB1_MAGO7
biological_process	GO:0006207	'de novo' pyrimidine nucleobase biosynthetic process	1	5	0.2	0.934963	0.370483	1	1	G4MVB1_MAGO7
biological_process	GO:0000056	ribosomal small subunit export from nucleus	1	4	0.25	0.95859	0.309394	1	1	G4N871_MAGO7
molecular_function	GO:0016758	hexosyltransferase activity	1	5	0.2	0.495422	0.697325	1	1	G4NIF9_MAGO7
molecular_function	GO:0003954	NADH dehydrogenase activity	1	3	0.333333	0.805449	0.574463	1	1	G4N8E7_MAGO7
biological_process	GO:0006116	NADH oxidation	1	4	0.25	0.95859	0.309394	1	1	G4N8E7_MAGO7
biological_process	GO:0000082	G1/S transition of mitotic cell cycle	1	3	0.333333	0.943404	0.185136	1	1	G4N814_MAGO7
biological_process	GO:0051865	protein autoubiquitination	1	2	0.5	0.992217	0.168926	1	1	G4MUH5_MAGO7
biological_process	GO:0007021	tubulin complex assembly	1	6	0.166667	0.908025	0.426184	1	1	G4MZK1_MAGO7
molecular_function	GO:0003950	NAD+ ADP-ribosyltransferase activity	1	2	0.5	0.993319	0.156966	1	1	G4ML01_MAGO7
biological_process	GO:0006471	protein ADP-ribosylation	1	1	1	1	0.0883546	1	1	G4ML01_MAGO7
molecular_function	GO:0004126	cytidine deaminase activity	1	1	1	1	0.0818233	1	1	G4MRK8_MAGO7
molecular_function	GO:0047844	deoxycytidine deaminase activity	1	1	1	1	0.0818233	1	1	G4MRK8_MAGO7
biological_process	GO:0006217	deoxycytidine catabolic process	1	1	1	1	0.0883546	1	1	G4MRK8_MAGO7
cellular_component	GO:0005811	lipid droplet	1	6	0.166667	0.90207	0.438107	1	1	G4MLL8_MAGO7
cellular_component	GO:0097038	perinuclear endoplasmic reticulum	1	2	0.5	0.95571	0.319009	1	1	G4MWW2_MAGO7
cellular_component	GO:0030136	clathrin-coated vesicle	1	2	0.5	0.99818	0.0135706	1	0.905	G4N7C0_MAGO7
molecular_function	GO:0061629	RNA polymerase II-specific DNA-binding transcription factor binding	1	3	0.333333	0.981046	0.225971	1	1	G4N7K9_MAGO7
biological_process	GO:0000902	cell morphogenesis	1	4	0.25	0.932103	0.208583	1	1	G4MUV9_MAGO7
cellular_component	GO:0120114	Sm-like protein family complex	1	1	1	0.40672	0.819104	1	1	G4MT14_MAGO7
biological_process	GO:0000956	nuclear-transcribed mRNA catabolic process	1	5	0.2	0.999708	0.00125522	1	0.386	G4MT14_MAGO7
molecular_function	GO:0042910	xenobiotic transmembrane transporter activity	1	3	0.333333	0.981046	0.225971	1	1	G4MKF0_MAGO7
biological_process	GO:1990961	xenobiotic detoxification by transmembrane export across the plasma membrane	1	3	0.333333	0.978018	0.242398	1	1	G4MKF0_MAGO7
molecular_function	GO:0042803	protein homodimerization activity	1	5	0.2	0.943428	0.347532	1	1	G4NHA0_MAGO7
biological_process	GO:0090173	regulation of synaptonemal complex assembly	1	1	1	1	0.0883546	1	1	G4N9J8_MAGO7
cellular_component	GO:0031431	Dbf4-dependent protein kinase complex	1	1	1	1	0.0915524	1	1	G4N814_MAGO7
biological_process	GO:1902977	mitotic DNA replication preinitiation complex assembly	1	2	0.5	0.992217	0.168926	1	1	G4N814_MAGO7
biological_process	GO:0031573	mitotic intra-S DNA damage checkpoint signaling	1	4	0.25	0.95859	0.309394	1	1	G4N814_MAGO7
biological_process	GO:0043392	negative regulation of DNA binding	1	1	1	0.978018	0.242398	1	1	G4N814_MAGO7
biological_process	GO:0001100	negative regulation of exit from mitosis	1	3	0.333333	0.978018	0.242398	1	1	G4N814_MAGO7
biological_process	GO:0010620	negative regulation of transcription by transcription factor catabolism	1	2	0.5	0.992217	0.168926	1	1	G4N814_MAGO7
biological_process	GO:1905561	positive regulation of kinetochore assembly	1	1	1	1	0.0883546	1	1	G4N814_MAGO7
biological_process	GO:0060903	positive regulation of meiosis I	1	1	1	1	0.0883546	1	1	G4N814_MAGO7
biological_process	GO:1905263	positive regulation of meiotic DNA double-strand break formation involved in reciprocal meiotic recombination	1	1	1	1	0.0883546	1	1	G4N814_MAGO7
biological_process	GO:1904968	positive regulation of monopolar spindle attachment to meiosis I kinetochore	1	1	1	1	0.0883546	1	1	G4N814_MAGO7
biological_process	GO:0006279	premeiotic DNA replication	1	2	0.5	0.992217	0.168926	1	1	G4N814_MAGO7
biological_process	GO:0007089	traversing start control point of mitotic cell cycle	1	3	0.333333	0.978018	0.242398	1	1	G4MTA2_MAGO7
biological_process	GO:2000232	regulation of rRNA processing	1	3	0.333333	0.95859	0.309394	1	1	G4MUH5_MAGO7
biological_process	GO:0000055	ribosomal large subunit export from nucleus	1	6	0.166667	0.981733	0.121459	1	1	G4N871_MAGO7
molecular_function	GO:0004408	holocytochrome-c synthase activity	1	2	0.5	0.993319	0.156966	1	1	G4NA39_MAGO7
molecular_function	GO:0015299	solute:proton antiporter activity	1	5	0.2	0.8359	0.536472	1	1	G4MWL2_MAGO7
biological_process	GO:0006031	chitin biosynthetic process	1	3	0.333333	0.934963	0.370483	1	1	G4N1B2_MAGO7
molecular_function	GO:0048487	beta-tubulin binding	1	2	0.5	0.993319	0.156966	1	1	G4MZK1_MAGO7
biological_process	GO:0007023	post-chaperonin tubulin folding pathway	1	3	0.333333	0.978018	0.242398	1	1	G4MZK1_MAGO7
biological_process	GO:0044283	small molecule biosynthetic process	1	2	0.5	0.00267139	0.99904	0.168	1	G4MPC7_MAGO7
cellular_component	GO:0031234	extrinsic component of cytoplasmic side of plasma membrane	1	2	0.5	0.930597	0.381411	1	1	G4MUH5_MAGO7
cellular_component	GO:1990306	RSP5-BUL ubiquitin ligase complex	1	1	1	1	0.0915524	1	1	G4MUH5_MAGO7
biological_process	GO:0034644	cellular response to UV	1	1	1	0.908025	0.426184	1	1	G4MUH5_MAGO7
biological_process	GO:0006333	chromatin assembly or disassembly	1	2	0.5	0.431602	0.803106	1	1	G4MUH5_MAGO7
biological_process	GO:0045723	positive regulation of fatty acid biosynthetic process	1	1	1	1	0.0883546	1	1	G4MUH5_MAGO7
biological_process	GO:0048260	positive regulation of receptor-mediated endocytosis	1	1	1	1	0.0883546	1	1	G4MUH5_MAGO7
biological_process	GO:0006513	protein monoubiquitination	1	2	0.5	0.95859	0.309394	1	1	G4MUH5_MAGO7
biological_process	GO:0010794	regulation of dolichol biosynthetic process	1	1	1	1	0.0883546	1	1	G4MUH5_MAGO7
biological_process	GO:0032443	regulation of ergosterol biosynthetic process	1	1	1	1	0.0883546	1	1	G4MUH5_MAGO7
biological_process	GO:0031384	regulation of initiation of mating projection growth	1	1	1	1	0.0883546	1	1	G4MUH5_MAGO7
biological_process	GO:0010793	regulation of mRNA export from nucleus	1	1	1	1	0.0883546	1	1	G4MUH5_MAGO7
biological_process	GO:0010796	regulation of multivesicular body size	1	1	1	1	0.0883546	1	1	G4MUH5_MAGO7
biological_process	GO:0006808	regulation of nitrogen utilization	1	2	0.5	0.992217	0.168926	1	1	G4MUH5_MAGO7
biological_process	GO:0019220	regulation of phosphate metabolic process	1	1	1	0.981045	0.0636495	1	1	G4MUH5_MAGO7
biological_process	GO:2000203	regulation of ribosomal large subunit export from nucleus	1	1	1	1	0.0883546	1	1	G4MUH5_MAGO7
biological_process	GO:2000238	regulation of tRNA export from nucleus	1	1	1	1	0.0883546	1	1	G4MUH5_MAGO7
biological_process	GO:2000235	regulation of tRNA processing	1	1	1	1	0.0883546	1	1	G4MUH5_MAGO7
biological_process	GO:0010795	regulation of ubiquinone biosynthetic process	1	1	1	1	0.0883546	1	1	G4MUH5_MAGO7
biological_process	GO:0009410	response to xenobiotic stimulus	1	2	0.5	0.992217	0.168926	1	1	G4MUH5_MAGO7
biological_process	GO:0034517	ribophagy	1	2	0.5	0.992217	0.168926	1	1	G4MUH5_MAGO7
biological_process	GO:0070086	ubiquitin-dependent endocytosis	1	1	1	1	0.0883546	1	1	G4MUH5_MAGO7
biological_process	GO:0005992	trehalose biosynthetic process	1	4	0.25	0.95859	0.309394	1	1	G4N8C1_MAGO7
cellular_component	GO:0005786	signal recognition particle, endoplasmic reticulum targeting	1	5	0.2	0.930597	0.381411	1	1	G4NH26_MAGO7
molecular_function	GO:0008312	7S RNA binding	1	5	0.2	0.943428	0.347532	1	1	G4NH26_MAGO7
biological_process	GO:0006614	SRP-dependent cotranslational protein targeting to membrane	1	8	0.125	0.780921	0.603987	1	1	G4NH26_MAGO7
cellular_component	GO:0042764	ascospore-type prospore	1	1	1	0.998063	0.0201553	1	0.952	G4MTA2_MAGO7
cellular_component	GO:1990860	Pho85-Pho80 CDK-cyclin complex	1	1	1	1	0.0915524	1	1	G4MTA2_MAGO7
biological_process	GO:0050849	negative regulation of calcium-mediated signaling	1	1	1	1	0.0883546	1	1	G4MTA2_MAGO7
biological_process	GO:0043433	negative regulation of DNA-binding transcription factor activity	1	2	0.5	0.992217	0.168926	1	1	G4MTA2_MAGO7
biological_process	GO:0045719	negative regulation of glycogen biosynthetic process	1	1	1	1	0.0883546	1	1	G4MTA2_MAGO7
biological_process	GO:0016242	negative regulation of macroautophagy	1	1	1	1	0.0883546	1	1	G4MTA2_MAGO7
biological_process	GO:0045936	negative regulation of phosphate metabolic process	1	1	1	0.978018	0.242398	1	1	G4MTA2_MAGO7
biological_process	GO:0071073	positive regulation of phospholipid biosynthetic process	1	1	1	1	0.0883546	1	1	G4MTA2_MAGO7
biological_process	GO:0051302	regulation of cell division	1	1	1	0.780921	0.603987	1	1	G4MTA2_MAGO7
biological_process	GO:0032878	regulation of establishment or maintenance of cell polarity	1	1	1	0.997445	0.0414102	1	1	G4MTA2_MAGO7
biological_process	GO:0031647	regulation of protein stability	1	1	1	0.934963	0.370483	1	1	G4MTA2_MAGO7
biological_process	GO:0006464	cellular protein modification process	1	5	0.2	0.963751	0.0565834	1	1	G4MR87_MAGO7
biological_process	GO:0072666	establishment of protein localization to vacuole	1	2	0.5	0.837548	0.419681	1	1	G4MR87_MAGO7
biological_process	GO:0019915	lipid storage	1	2	0.5	0.95859	0.309394	1	1	G4MLL8_MAGO7
cellular_component	GO:0090726	cortical dynamic polarity patch	1	2	0.5	0.991637	0.174741	1	1	G4MUV9_MAGO7
biological_process	GO:1902917	positive regulation of mating projection assembly	1	1	1	1	0.0883546	1	1	G4MUV9_MAGO7
biological_process	GO:2000769	regulation of establishment or maintenance of cell polarity regulating cell shape	1	1	1	0.992217	0.168926	1	1	G4MUV9_MAGO7
biological_process	GO:1901901	regulation of protein localization to cell division site involved in cytokinesis	1	1	1	1	0.0883546	1	1	G4MUV9_MAGO7
cellular_component	GO:0031533	mRNA cap methyltransferase complex	1	2	0.5	0.991637	0.174741	1	1	G4N4L3_MAGO7
molecular_function	GO:0030620	U2 snRNA binding	1	2	0.5	0.993319	0.156966	1	1	G4N5D4_MAGO7
molecular_function	GO:0030623	U5 snRNA binding	1	1	1	1	0.0818233	1	1	G4N5D4_MAGO7
biological_process	GO:0000389	mRNA 3'-splice site recognition	1	1	1	1	0.0883546	1	1	G4N5D4_MAGO7
biological_process	GO:0000395	mRNA 5'-splice site recognition	1	2	0.5	0.992217	0.168926	1	1	G4N5D4_MAGO7
biological_process	GO:0000244	spliceosomal tri-snRNP complex assembly	1	2	0.5	0.992217	0.168926	1	1	G4N5D4_MAGO7
molecular_function	GO:0042162	telomeric DNA binding	1	3	0.333333	0.774376	0.609347	1	1	G4NHA0_MAGO7
cellular_component	GO:0035145	exon-exon junction complex	1	2	0.5	0.991637	0.174741	1	1	G4ND41_MAGO7
cellular_component	GO:0030870	Mre11 complex	1	3	0.333333	0.976434	0.250329	1	1	G4MPV1_MAGO7
biological_process	GO:0009272	fungal-type cell wall biogenesis	1	2	0.5	0.847169	0.523277	1	1	G4NFW8_MAGO7
biological_process	GO:0042766	nucleosome mobilization	1	2	0.5	0.992217	0.168926	1	1	G4N7K9_MAGO7
cellular_component	GO:0017087	mitochondrial processing peptidase complex	1	2	0.5	0.991637	0.174741	1	1	G4N5F1_MAGO7
molecular_function	GO:0008022	protein C-terminus binding	1	2	0.5	0.993319	0.156966	1	1	G4NC31_MAGO7
molecular_function	GO:0016657	oxidoreductase activity, acting on NAD(P)H, nitrogenous group as acceptor	1	1	1	1	0.0818233	1	1	G4MPS3_MAGO7
cellular_component	GO:0005946	alpha,alpha-trehalose-phosphate synthase complex (UDP-forming)	1	2	0.5	0.991637	0.174741	1	1	G4N8C1_MAGO7
biological_process	GO:0070413	trehalose metabolism in response to stress	1	2	0.5	0.992217	0.168926	1	1	G4N8C1_MAGO7
molecular_function	GO:0016773	phosphotransferase activity, alcohol group as acceptor	1	1	1	0.999873	0.000286605	1	0.049	G4NL09_MAGO7
biological_process	GO:0000288	nuclear-transcribed mRNA catabolic process, deadenylation-dependent decay	1	2	0.5	0.999959	0.000350705	1	0.131	G4NC31_MAGO7
biological_process	GO:0032120	ascospore-type prospore membrane formation	1	1	1	1	0.0883546	1	1	G4MZL7_MAGO7
biological_process	GO:0010619	adenylate cyclase-activating glucose-activated G protein-coupled receptor signaling pathway	1	2	0.5	0.992217	0.168926	1	1	G4N7T3_MAGO7
molecular_function	GO:0015275	stretch-activated, cation-selective, calcium channel activity	1	1	1	1	0.0818233	1	1	G4MWW2_MAGO7
biological_process	GO:0006884	cell volume homeostasis	1	1	1	1	0.0883546	1	1	G4MWW2_MAGO7
biological_process	GO:0010515	negative regulation of induction of conjugation with cellular fusion	1	2	0.5	0.992217	0.168926	1	1	G4N7T3_MAGO7
cellular_component	GO:0000123	histone acetyltransferase complex	1	1	1	0.999678	0.00191318	1	0.214	G4N1E0_MAGO7
biological_process	GO:0038203	TORC2 signaling	1	1	1	0.978018	0.242398	1	1	G4N7N3_MAGO7
molecular_function	GO:0016307	phosphatidylinositol phosphate kinase activity	1	2	0.5	0.981046	0.225971	1	1	G4N6C3_MAGO7
biological_process	GO:0006335	DNA replication-dependent chromatin assembly	1	1	1	1	0.0883546	1	1	G4N6F3_MAGO7
molecular_function	GO:0033897	ribonuclease T2 activity	1	2	0.5	0.993319	0.156966	1	1	G4MKH8_MAGO7
molecular_function	GO:0051723	protein methylesterase activity	1	1	1	1	0.0818233	1	1	G4MUD9_MAGO7
biological_process	GO:0006482	protein demethylation	1	1	1	1	0.0883546	1	1	G4MUD9_MAGO7
cellular_component	GO:0032592	integral component of mitochondrial membrane	1	2	0.5	0.847811	0.405246	1	1	G4ND67_MAGO7
molecular_function	GO:0042626	ATPase-coupled transmembrane transporter activity	1	2	0.5	0.666018	0.501192	1	1	G4NC33_MAGO7
molecular_function	GO:0004419	hydroxymethylglutaryl-CoA lyase activity	1	1	1	1	0.0818233	1	1	G4MPC7_MAGO7
biological_process	GO:0046827	positive regulation of protein export from nucleus	1	2	0.5	0.992217	0.168926	1	1	G4N7T3_MAGO7
cellular_component	GO:0000111	nucleotide-excision repair factor 2 complex	1	1	1	1	0.0915524	1	1	G4MUE8_MAGO7
cellular_component	GO:0120125	PNGase complex	1	1	1	1	0.0915524	1	1	G4MUE8_MAGO7
molecular_function	GO:0000224	peptide-N4-(N-acetyl-beta-glucosaminyl)asparagine amidase activity	1	1	1	1	0.0818233	1	1	G4MUE8_MAGO7
biological_process	GO:0035977	protein deglycosylation involved in glycoprotein catabolic process	1	2	0.5	0.978018	0.242398	1	1	G4MUE8_MAGO7
biological_process	GO:0097466	ubiquitin-dependent glycoprotein ERAD pathway	1	1	1	0.992217	0.168926	1	1	G4MUE8_MAGO7
molecular_function	GO:0004691	cAMP-dependent protein kinase activity	1	1	1	1	0.0818233	1	1	G4N7T3_MAGO7
biological_process	GO:0061987	negative regulation of transcription from RNA polymerase II promoter by glucose	1	1	1	0.95859	0.309394	1	1	G4N7T3_MAGO7
molecular_function	GO:0004698	calcium-dependent protein kinase C activity	1	1	1	1	0.0818233	1	1	G4NFW8_MAGO7
biological_process	GO:0032186	cellular bud neck septin ring organization	1	1	1	1	0.0883546	1	1	G4NFW8_MAGO7
biological_process	GO:0010606	positive regulation of cytoplasmic mRNA processing body assembly	1	1	1	1	0.0883546	1	1	G4NFW8_MAGO7
biological_process	GO:0060211	regulation of nuclear-transcribed mRNA poly(A) tail shortening	1	1	1	0.992217	0.168926	1	1	G4NFW8_MAGO7
biological_process	GO:0009612	response to mechanical stimulus	1	1	1	1	0.0883546	1	1	G4NFW8_MAGO7
molecular_function	GO:0019905	syntaxin binding	1	2	0.5	0.993319	0.156966	1	1	G4MRI9_MAGO7
biological_process	GO:0010723	positive regulation of transcription from RNA polymerase II promoter in response to iron	1	1	1	1	0.0883546	1	1	G4NC05_MAGO7
biological_process	GO:1903715	regulation of aerobic respiration	1	1	1	1	0.0883546	1	1	G4NC05_MAGO7
molecular_function	GO:0140658	ATP-dependent chromatin remodeler activity	1	1	1	NA	NA	NA	NA	G4N7K9_MAGO7
molecular_function	GO:0031492	nucleosomal DNA binding	1	1	1	1	0.0818233	1	1	G4N7K9_MAGO7
molecular_function	GO:0000182	rDNA binding	1	1	1	1	0.0818233	1	1	G4N7K9_MAGO7
biological_process	GO:0035973	aggrephagy	1	1	1	1	0.0883546	1	1	G4N7K9_MAGO7
biological_process	GO:1900189	positive regulation of cell adhesion involved in single-species biofilm formation	1	1	1	1	0.0883546	1	1	G4N7K9_MAGO7
biological_process	GO:2000219	positive regulation of invasive growth in response to glucose limitation	1	1	1	1	0.0883546	1	1	G4N7K9_MAGO7
biological_process	GO:0031496	positive regulation of mating type switching	1	1	1	1	0.0883546	1	1	G4N7K9_MAGO7
biological_process	GO:0061412	positive regulation of transcription from RNA polymerase II promoter in response to amino acid starvation	1	1	1	1	0.0883546	1	1	G4N7K9_MAGO7
biological_process	GO:0042148	strand invasion	1	1	1	0.992217	0.168926	1	1	G4N7K9_MAGO7
biological_process	GO:0000493	box H/ACA snoRNP assembly	1	1	1	1	0.0883546	1	1	G4N8S8_MAGO7
biological_process	GO:0016074	sno(s)RNA metabolic process	1	1	1	0.847169	0.523277	1	1	G4N8S8_MAGO7
cellular_component	GO:0018444	translation release factor complex	1	1	1	1	0.0915524	1	1	G4NC31_MAGO7
molecular_function	GO:0019003	GDP binding	1	1	1	1	0.0818233	1	1	G4NC31_MAGO7
biological_process	GO:0002184	cytoplasmic translational termination	1	1	1	1	0.0883546	1	1	G4NC31_MAGO7
molecular_function	GO:0004651	polynucleotide 5'-phosphatase activity	1	1	1	1	0.0818233	1	1	G4N4L3_MAGO7
molecular_function	GO:0004450	isocitrate dehydrogenase (NADP+) activity	1	1	1	1	0.0818233	1	1	G4MUJ2_MAGO7
biological_process	GO:0006102	isocitrate metabolic process	1	1	1	1	0.0883546	1	1	G4MUJ2_MAGO7
biological_process	GO:0007095	mitotic G2 DNA damage checkpoint signaling	1	2	0.5	0.992217	0.168926	1	1	G4MPV1_MAGO7
molecular_function	GO:0004805	trehalose-phosphatase activity	1	1	1	1	0.0818233	1	1	G4N8C1_MAGO7
biological_process	GO:0035970	peptidyl-threonine dephosphorylation	1	1	1	1	0.0883546	1	1	G4N8C1_MAGO7
molecular_function	GO:0004767	sphingomyelin phosphodiesterase activity	1	2	0.5	0.993319	0.156966	1	1	G4MKJ1_MAGO7
cellular_component	GO:0071627	integral component of fungal-type vacuolar membrane	1	1	1	1	0.0915524	1	1	G4N514_MAGO7
molecular_function	GO:0044604	ABC-type phytochelatin transporter activity	1	1	1	1	0.0818233	1	1	G4N514_MAGO7
biological_process	GO:0036249	cadmium ion import into vacuole	1	1	1	1	0.0883546	1	1	G4N514_MAGO7
biological_process	GO:0098849	cellular detoxification of cadmium ion	1	1	1	1	0.0883546	1	1	G4N514_MAGO7
biological_process	GO:0071996	glutathione transmembrane import into vacuole	1	1	1	1	0.0883546	1	1	G4N514_MAGO7
biological_process	GO:0036246	phytochelatin 2 import into vacuole	1	1	1	1	0.0883546	1	1	G4N514_MAGO7
molecular_function	GO:0005545	1-phosphatidylinositol binding	1	1	1	1	0.0818233	1	1	G4N7C0_MAGO7
biological_process	GO:0048268	clathrin coat assembly	1	1	1	1	0.0883546	1	1	G4N7C0_MAGO7
cellular_component	GO:0032777	Piccolo NuA4 histone acetyltransferase complex	1	1	1	0.991637	0.174741	1	1	G4MNE5_MAGO7
biological_process	GO:0071985	multivesicular body sorting pathway	1	1	1	0.899413	0.321102	1	1	G4NCT4_MAGO7
molecular_function	GO:0016298	lipase activity	1	1	1	0.872149	0.312845	1	1	G4MLL8_MAGO7
molecular_function	GO:0008353	RNA polymerase II CTD heptapeptide repeat kinase activity	0	2	0	0.843034	1	1	1
molecular_function	GO:0034511	U3 snoRNA binding	0	7	0	0.549961	1	1	1
molecular_function	GO:0000979	RNA polymerase II core promoter sequence-specific DNA binding	0	2	0	0.843034	1	1	1
molecular_function	GO:0017025	TBP-class protein binding	0	5	0	0.652468	1	1	1
biological_process	GO:0060261	positive regulation of transcription initiation from RNA polymerase II promoter	0	2	0	0.434504	1	1	1
biological_process	GO:0051123	RNA polymerase II preinitiation complex assembly	0	7	0	0.248946	1	1	1
cellular_component	GO:0000815	ESCRT III complex	0	2	0	0.825259	1	1	1
biological_process	GO:1904669	ATP export	0	4	0	0.690606	1	1	1
biological_process	GO:0071454	cellular response to anoxia	0	1	0	0.911645	1	1	1
biological_process	GO:1904902	ESCRT III complex assembly	0	1	0	0.911645	1	1	1
biological_process	GO:0070676	intralumenal vesicle formation	0	3	0	0.757602	1	1	1
biological_process	GO:0043328	protein transport to vacuole involved in ubiquitin-dependent protein catabolic process via the multivesicular body sorting pathway	0	5	0	0.629517	1	1	1
molecular_function	GO:0008526	phosphatidylinositol transfer activity	0	2	0	0.843034	1	1	1
cellular_component	GO:0005763	mitochondrial small ribosomal subunit	0	7	0	0.510382	1	1	1
biological_process	GO:0090114	COPII-coated vesicle budding	0	2	0	0.690606	1	1	1
molecular_function	GO:0030628	pre-mRNA 3'-splice site binding	0	1	0	0.918177	1	1	1
cellular_component	GO:0000781	chromosome, telomeric region	0	16	0	0.0742481	1	0.944	1
cellular_component	GO:0000346	transcription export complex	0	1	0	0.825259	1	1	1
biological_process	GO:0006406	mRNA export from nucleus	0	9	0	0.489502	0.828367	1	1
biological_process	GO:0031509	subtelomeric heterochromatin assembly	0	11	0	0.360922	1	1	1
biological_process	GO:0006368	transcription elongation from RNA polymerase II promoter	0	14	0	0.107756	1	1	1
biological_process	GO:0006283	transcription-coupled nucleotide-excision repair	0	2	0	0.831074	1	1	1
cellular_component	GO:0005773	vacuole	0	6	0	0.0433525	0.986519	0.769	1
biological_process	GO:0009267	cellular response to starvation	0	2	0	0.712824	0.671069	1	1
biological_process	GO:0000425	pexophagy	0	2	0	0.831074	1	1	1
biological_process	GO:0007039	protein catabolic process in the vacuole	0	1	0	0.911645	1	1	1
biological_process	GO:0006914	autophagy	0	22	0	0.883647	0.221538	1	1
molecular_function	GO:0015035	protein-disulfide reductase activity	0	3	0	0.774376	0.609347	1	1
biological_process	GO:0006662	glycerol ether metabolic process	0	1	0	0.911645	1	1	1
cellular_component	GO:0071004	U2-type prespliceosome	0	8	0	0.463583	1	1	1
molecular_function	GO:1990447	U2 snRNP binding	0	1	0	0.918177	1	1	1
biological_process	GO:1903241	U2-type prespliceosome assembly	0	1	0	0.911645	1	1	1
biological_process	GO:0006094	gluconeogenesis	0	7	0	0.678898	0.700233	1	1
biological_process	GO:0034553	mitochondrial respiratory chain complex II assembly	0	1	0	0.911645	1	1	1
molecular_function	GO:0008810	cellulase activity	0	5	0	0.652468	1	1	1
biological_process	GO:0030245	cellulose catabolic process	0	22	0	0.12982	1	1	1
molecular_function	GO:0004177	aminopeptidase activity	0	20	0	0.0910318	1	0.998	1
molecular_function	GO:0004301	epoxide hydrolase activity	0	1	0	0.918177	1	1	1
biological_process	GO:0043171	peptide catabolic process	0	2	0	0.847169	0.523277	1	1
molecular_function	GO:0031419	cobalamin binding	0	2	0	0.843034	1	1	1
molecular_function	GO:0050086	mannitol 2-dehydrogenase activity	0	1	0	0.918177	1	1	1
molecular_function	GO:0030515	snoRNA binding	0	12	0	0.180779	1	1	1
biological_process	GO:1990120	messenger ribonucleoprotein complex assembly	0	1	0	0.911645	1	1	1
biological_process	GO:0071042	nuclear polyadenylation-dependent mRNA catabolic process	0	1	0	0.911645	1	1	1
cellular_component	GO:1990726	Lsm1-7-Pat1 complex	0	3	0	0.749671	1	1	1
cellular_component	GO:0005688	U6 snRNP	0	4	0	0.680991	1	1	1
biological_process	GO:0030490	maturation of SSU-rRNA	0	6	0	0.390654	0.829028	1	1
molecular_function	GO:0070006	metalloaminopeptidase activity	0	8	0	0.504903	1	1	1
biological_process	GO:0070084	protein initiator methionine removal	0	3	0	0.757602	1	1	1
molecular_function	GO:0004755	saccharopine dehydrogenase (NADP+, L-glutamate-forming) activity	0	1	0	0.918177	1	1	1
biological_process	GO:0019878	lysine biosynthetic process via aminoadipic acid	0	5	0	0.629517	1	1	1
cellular_component	GO:0042025	host cell nucleus	0	10	0	0.382439	1	1	1
cellular_component	GO:0005783	endoplasmic reticulum	0	41	0	0.0512944	0.972825	0.861	1
biological_process	GO:0046279	3,4-dihydroxybenzoate biosynthetic process	0	1	0	0.911645	1	1	1
biological_process	GO:0019630	quinate metabolic process	0	1	0	0.911645	1	1	1
cellular_component	GO:0071008	U2-type post-mRNA release spliceosomal complex	0	2	0	0.825259	1	1	1
molecular_function	GO:0004608	phosphatidylethanolamine N-methyltransferase activity	0	1	0	0.918177	1	1	1
biological_process	GO:0006656	phosphatidylcholine biosynthetic process	0	5	0	0.629517	1	1	1
cellular_component	GO:0016282	eukaryotic 43S preinitiation complex	0	14	0	0.260205	1	1	1
cellular_component	GO:0033290	eukaryotic 48S preinitiation complex	0	16	0	0.214602	1	1	1
cellular_component	GO:0005852	eukaryotic translation initiation factor 3 complex	0	6	0	0.286511	1	1	1
molecular_function	GO:0043022	ribosome binding	0	13	0	0.30221	1	1	1
biological_process	GO:0001732	formation of cytoplasmic translation initiation complex	0	14	0	0.273181	1	1	1
biological_process	GO:0006446	regulation of translational initiation	0	3	0	0.434504	1	1	1
molecular_function	GO:0004402	histone acetyltransferase activity	0	5	0	0.504903	1	1	1
molecular_function	GO:0004707	MAP kinase activity	0	7	0	0.549961	1	1	1
molecular_function	GO:0004708	MAP kinase kinase activity	0	3	0	0.774029	1	1	1
biological_process	GO:0000196	cell wall integrity MAPK cascade	0	2	0	0.690606	1	1	1
biological_process	GO:0000165	MAPK cascade	0	3	0	0.328931	1	1	1
biological_process	GO:0075018	positive regulation of appressorium formation	0	3	0	0.757602	1	1	1
biological_process	GO:0050850	positive regulation of calcium-mediated signaling	0	2	0	0.831074	1	1	1
cellular_component	GO:0071540	eukaryotic translation initiation factor 3 complex, eIF3e	0	6	0	0.561893	1	1	1
cellular_component	GO:0071541	eukaryotic translation initiation factor 3 complex, eIF3m	0	6	0	0.561893	1	1	1
cellular_component	GO:0034399	nuclear periphery	0	18	0	0.160708	1	1	1
biological_process	GO:0016126	sterol biosynthetic process	0	8	0	0.51875	0.811637	1	1
molecular_function	GO:0008409	5'-3' exonuclease activity	0	1	0	0.893449	0.450039	1	1
biological_process	GO:0006284	base-excision repair	0	5	0	0.780921	0.603987	1	1
biological_process	GO:0043137	DNA replication, removal of RNA primer	0	2	0	0.757602	1	1	1
molecular_function	GO:0061981	3-hydroxykynureninase activity	0	1	0	0.918177	1	1	1
molecular_function	GO:0030429	kynureninase activity	0	1	0	0.918177	1	1	1
biological_process	GO:0034354	'de novo' NAD biosynthetic process from tryptophan	0	4	0	0.690606	1	1	1
biological_process	GO:0043420	anthranilate metabolic process	0	3	0	0.757602	1	1	1
biological_process	GO:0097053	L-kynurenine catabolic process	0	1	0	0.911645	1	1	1
biological_process	GO:0019805	quinolinate biosynthetic process	0	3	0	0.757602	1	1	1
biological_process	GO:0006569	tryptophan catabolic process	0	3	0	0.988045	0.0660998	1	1
biological_process	GO:0002183	cytoplasmic translational initiation	0	4	0	0.156384	1	1	1
biological_process	GO:0031047	gene silencing by RNA	0	8	0	0.476723	1	1	1
biological_process	GO:1990625	negative regulation of cytoplasmic translational initiation in response to stress	0	2	0	0.831074	1	1	1
molecular_function	GO:0009916	alternative oxidase activity	0	1	0	0.918177	1	1	1
molecular_function	GO:0016162	cellulose 1,4-beta-cellobiosidase activity	0	1	0	0.918177	1	1	1
molecular_function	GO:0030248	cellulose binding	0	22	0	0.152301	1	1	1
molecular_function	GO:0034512	box C/D RNA binding	0	1	0	0.918177	1	1	1
cellular_component	GO:0043529	GET complex	0	2	0	0.825259	1	1	1
molecular_function	GO:0044183	protein folding chaperone	0	2	0	0.843034	1	1	1
biological_process	GO:0006620	posttranslational protein targeting to endoplasmic reticulum membrane	0	3	0	0.573816	1	1	1
biological_process	GO:0045048	protein insertion into ER membrane	0	3	0	0.690606	1	1	1
biological_process	GO:0009408	response to heat	0	4	0	0.780921	0.603987	1	1
biological_process	GO:0010038	response to metal ion	0	2	0	0.9339	0.253074	1	1
cellular_component	GO:0022627	cytosolic small ribosomal subunit	0	10	0	0.382439	1	1	1
molecular_function	GO:0001965	G-protein alpha-subunit binding	0	1	0	0.918177	1	1	1
molecular_function	GO:0005092	GDP-dissociation inhibitor activity	0	3	0	0.652468	1	1	1
biological_process	GO:0007186	G protein-coupled receptor signaling pathway	0	5	0	0.847169	0.523277	1	1
biological_process	GO:0140469	GCN2-mediated signaling	0	2	0	0.831074	1	1	1
biological_process	GO:0061157	mRNA destabilization	0	1	0	0.999892	0.000777828	1	0.32
biological_process	GO:1903138	negative regulation of cell wall integrity MAPK cascade	0	2	0	0.831074	1	1	1
biological_process	GO:1902660	negative regulation of glucose mediated signaling pathway	0	4	0	0.690606	1	1	1
biological_process	GO:1903753	negative regulation of p38MAPK cascade	0	3	0	0.757602	1	1	1
biological_process	GO:2001125	negative regulation of translational frameshifting	0	1	0	0.911645	1	1	1
biological_process	GO:0031139	positive regulation of conjugation with cellular fusion	0	3	0	0.917436	0.287176	1	1
biological_process	GO:0001934	positive regulation of protein phosphorylation	0	1	0	0.629517	1	1	1
biological_process	GO:0008104	protein localization	0	3	0	0.983115	0.0271816	1	1
biological_process	GO:2000765	regulation of cytoplasmic translation	0	1	0	0.757602	1	1	1
biological_process	GO:0032995	regulation of fungal-type cell wall biogenesis	0	1	0	0.831074	1	1	1
biological_process	GO:1990116	ribosome-associated ubiquitin-dependent protein catabolic process	0	3	0	0.757602	1	1	1
molecular_function	GO:0031369	translation initiation factor binding	0	9	0	0.463528	1	1	1
cellular_component	GO:0000786	nucleosome	0	9	0	0.421066	1	1	1
cellular_component	GO:0035861	site of double-strand break	0	14	0	0.260205	1	1	1
biological_process	GO:0051984	positive regulation of chromosome segregation	0	2	0	0.908025	0.426184	1	1
biological_process	GO:1905342	positive regulation of protein localization to kinetochore	0	1	0	0.911645	1	1	1
cellular_component	GO:0030687	preribosome, large subunit precursor	0	17	0	0.160708	1	1	1
biological_process	GO:0042273	ribosomal large subunit biogenesis	0	7	0	0.390654	0.829028	1	1
cellular_component	GO:0031966	mitochondrial membrane	0	6	0	0.232821	0.84198	1	1
molecular_function	GO:0008495	protoheme IX farnesyltransferase activity	0	1	0	0.918177	1	1	1
biological_process	GO:0048034	heme O biosynthetic process	0	1	0	0.911645	1	1	1
cellular_component	GO:0030956	glutamyl-tRNA(Gln) amidotransferase complex	0	2	0	0.825259	1	1	1
molecular_function	GO:0050567	glutaminyl-tRNA synthase (glutamine-hydrolyzing) activity	0	2	0	0.843034	1	1	1
biological_process	GO:0070681	glutaminyl-tRNAGln biosynthesis via transamidation	0	2	0	0.831074	1	1	1
biological_process	GO:0032543	mitochondrial translation	0	14	0	0.142487	1	1	1
biological_process	GO:0051083	'de novo' cotranslational protein folding	0	3	0	0.757602	1	1	1
molecular_function	GO:0004042	acetyl-CoA:L-glutamate N-acetyltransferase activity	0	2	0	0.843034	1	1	1
molecular_function	GO:0103045	methione N-acyltransferase activity	0	2	0	0.843034	1	1	1
biological_process	GO:0006526	arginine biosynthetic process	0	5	0	0.476723	1	1	1
cellular_component	GO:0005774	vacuolar membrane	0	29	0	0.0382079	0.990671	0.714	1
molecular_function	GO:0051731	polynucleotide 5'-hydroxyl-kinase activity	0	2	0	0.71066	1	1	1
molecular_function	GO:0036218	dTTP diphosphatase activity	0	1	0	0.918177	1	1	1
molecular_function	GO:0035529	NADH pyrophosphatase activity	0	1	0	0.918177	1	1	1
molecular_function	GO:0000166	nucleotide binding	0	33	0	0.0276677	0.979906	0.751	1
biological_process	GO:0009204	deoxyribonucleoside triphosphate catabolic process	0	1	0	0.831074	1	1	1
biological_process	GO:0009117	nucleotide metabolic process	0	5	0	0.000297333	0.999976	0.018	1
cellular_component	GO:0030430	host cell cytoplasm	0	2	0	0.749671	1	1	1
molecular_function	GO:0050584	linoleate 11-lipoxygenase activity	0	1	0	0.918177	1	1	1
molecular_function	GO:1990136	linoleate 9S-lipoxygenase activity	0	1	0	0.918177	1	1	1
biological_process	GO:0043651	linoleic acid metabolic process	0	1	0	0.911645	1	1	1
molecular_function	GO:0004185	serine-type carboxypeptidase activity	0	5	0	0.652468	1	1	1
molecular_function	GO:0003856	3-dehydroquinate synthase activity	0	1	0	0.918177	1	1	1
molecular_function	GO:0003866	3-phosphoshikimate 1-carboxyvinyltransferase activity	0	1	0	0.918177	1	1	1
molecular_function	GO:0004764	shikimate 3-dehydrogenase (NADP+) activity	0	4	0	0.71066	1	1	1
molecular_function	GO:0004765	shikimate kinase activity	0	1	0	0.918177	1	1	1
biological_process	GO:0009073	aromatic amino acid family biosynthetic process	0	5	0	0.360922	1	1	1
biological_process	GO:0008652	cellular amino acid biosynthetic process	0	8	0	0.00034747	1	0.019	1
biological_process	GO:0009423	chorismate biosynthetic process	0	3	0	0.757602	1	1	1
cellular_component	GO:0030659	cytoplasmic vesicle membrane	0	3	0	0.9731	0.0830368	1	0.999
biological_process	GO:0072659	protein localization to plasma membrane	0	1	0	0.780921	0.603987	1	1
molecular_function	GO:0036002	pre-mRNA binding	0	1	0	0.943428	0.347532	1	1
biological_process	GO:0045787	positive regulation of cell cycle	0	1	0	0.767358	0.510498	1	1
biological_process	GO:0033120	positive regulation of RNA splicing	0	1	0	0.911645	1	1	1
biological_process	GO:0000387	spliceosomal snRNP assembly	0	7	0	0.81447	0.565496	1	1
molecular_function	GO:0003838	sterol 24-C-methyltransferase activity	0	3	0	0.774029	1	1	1
cellular_component	GO:0005965	protein farnesyltransferase complex	0	1	0	0.908448	1	1	1
molecular_function	GO:0004660	protein farnesyltransferase activity	0	1	0	0.918177	1	1	1
biological_process	GO:0061951	establishment of protein localization to plasma membrane	0	1	0	0.81447	0.565496	1	1
biological_process	GO:0018343	protein farnesylation	0	1	0	0.911645	1	1	1
molecular_function	GO:0008422	beta-glucosidase activity	0	12	0	0.358622	1	1	1
molecular_function	GO:0102483	scopolin beta-glucosidase activity	0	10	0	0.425537	1	1	1
cellular_component	GO:0031965	nuclear membrane	0	10	0	0.176975	1	1	1
cellular_component	GO:0044614	nuclear pore cytoplasmic filaments	0	1	0	0.908448	1	1	1
cellular_component	GO:0005844	polysome	0	6	0	0.463583	1	1	1
molecular_function	GO:0000822	inositol hexakisphosphate binding	0	2	0	0.843034	1	1	1
biological_process	GO:0006415	translational termination	0	2	0	0.908025	0.426184	1	1
biological_process	GO:0006409	tRNA export from nucleus	0	1	0	0.978018	0.242398	1	1
molecular_function	GO:0004096	catalase activity	0	4	0	0.71066	1	1	1
biological_process	GO:0042744	hydrogen peroxide catabolic process	0	5	0	0.629517	1	1	1
biological_process	GO:0043161	proteasome-mediated ubiquitin-dependent protein catabolic process	0	34	0	0.472418	0.687461	1	1
cellular_component	GO:0043614	multi-eIF complex	0	5	0	0.618589	1	1	1
cellular_component	GO:0031307	integral component of mitochondrial outer membrane	0	5	0	0.618589	1	1	1
molecular_function	GO:0008926	mannitol-1-phosphate 5-dehydrogenase activity	0	1	0	0.918177	1	1	1
biological_process	GO:0019594	mannitol metabolic process	0	1	0	0.911645	1	1	1
biological_process	GO:0042128	nitrate assimilation	0	4	0	0.690606	1	1	1
cellular_component	GO:0005887	integral component of plasma membrane	0	12	0	0.31547	1	1	1
molecular_function	GO:0005034	osmosensor activity	0	2	0	0.843034	1	1	1
cellular_component	GO:0019008	molybdopterin synthase complex	0	3	0	0.749671	1	1	1
molecular_function	GO:0030366	molybdopterin synthase activity	0	2	0	0.843034	1	1	1
biological_process	GO:0006777	Mo-molybdopterin cofactor biosynthetic process	0	8	0	0.476723	1	1	1
molecular_function	GO:0008265	Mo-molybdopterin cofactor sulfurase activity	0	1	0	0.918177	1	1	1
molecular_function	GO:0102867	molybdenum cofactor sulfurtransferase activity	0	1	0	0.918177	1	1	1
molecular_function	GO:0004519	endonuclease activity	0	16	0	0.406002	0.788674	1	1
molecular_function	GO:0008641	ubiquitin-like modifier activating enzyme activity	0	3	0	0.504903	1	1	1
molecular_function	GO:0004424	imidazoleglycerol-phosphate dehydratase activity	0	1	0	0.918177	1	1	1
biological_process	GO:0000105	histidine biosynthetic process	0	7	0	0.523028	1	1	1
molecular_function	GO:0098808	mRNA cap binding	0	1	0	0.918177	1	1	1
biological_process	GO:0002191	cap-dependent translational initiation	0	1	0	0.911645	1	1	1
cellular_component	GO:0005834	heterotrimeric G-protein complex	0	3	0	0.749671	1	1	1
molecular_function	GO:0001664	G protein-coupled receptor binding	0	3	0	0.774029	1	1	1
molecular_function	GO:0031683	G-protein beta/gamma-subunit complex binding	0	4	0	0.71066	1	1	1
molecular_function	GO:0043715	2,3-diketo-5-methylthiopentyl-1-phosphate enolase activity	0	1	0	0.918177	1	1	1
molecular_function	GO:0043716	2-hydroxy-3-keto-5-methylthiopentenyl-1-phosphate phosphatase activity	0	1	0	0.918177	1	1	1
molecular_function	GO:0043874	acireductone synthase activity	0	1	0	0.918177	1	1	1
biological_process	GO:0019509	L-methionine salvage from methylthioadenosine	0	5	0	0.629517	1	1	1
biological_process	GO:0019284	L-methionine salvage from S-adenosylmethionine	0	3	0	0.757602	1	1	1
biological_process	GO:0006506	GPI anchor biosynthetic process	0	20	0	0.107756	1	1	1
molecular_function	GO:0050525	cutinase activity	0	10	0	0.425537	1	1	1
cellular_component	GO:0009277	fungal-type cell wall	0	3	0	0.618589	1	1	1
molecular_function	GO:0005199	structural constituent of cell wall	0	4	0	0.71066	1	1	1
cellular_component	GO:0000328	fungal-type vacuole lumen	0	2	0	0.825259	1	1	1
molecular_function	GO:0032934	sterol binding	0	3	0	0.774029	1	1	1
biological_process	GO:0032366	intracellular sterol transport	0	2	0	0.831074	1	1	1
cellular_component	GO:0005787	signal peptidase complex	0	4	0	0.680991	1	1	1
biological_process	GO:0045047	protein targeting to ER	0	3	0	0.549046	0.793282	1	1
biological_process	GO:0006465	signal peptide processing	0	8	0	0.476723	1	1	1
molecular_function	GO:0030983	mismatched DNA binding	0	10	0	0.425537	1	1	1
biological_process	GO:0007534	gene conversion at mating-type locus	0	1	0	0.911645	1	1	1
biological_process	GO:0043570	maintenance of DNA repeat elements	0	1	0	0.690606	1	1	1
biological_process	GO:0006298	mismatch repair	0	12	0	0.299767	1	1	1
biological_process	GO:0007131	reciprocal meiotic recombination	0	2	0	0.908025	0.426184	1	1
biological_process	GO:1902413	negative regulation of mitotic cytokinesis	0	1	0	0.831074	1	1	1
biological_process	GO:1905665	positive regulation of calcium ion import across plasma membrane	0	1	0	0.911645	1	1	1
biological_process	GO:0106259	cell-to-cell migration in host	0	1	0	0.911645	1	1	1
biological_process	GO:0030448	hyphal growth	0	1	0	0.911645	1	1	1
biological_process	GO:0000921	septin ring assembly	0	3	0	0.757602	1	1	1
cellular_component	GO:0044233	mitochondria-associated endoplasmic reticulum membrane	0	1	0	0.90207	0.438107	1	1
biological_process	GO:0000266	mitochondrial fission	0	5	0	0.573816	1	1	1
biological_process	GO:0007006	mitochondrial membrane organization	0	1	0	0.879985	0.354616	1	1
biological_process	GO:0006998	nuclear envelope organization	0	3	0	0.573816	1	1	1
biological_process	GO:1902953	positive regulation of ER to Golgi vesicle-mediated transport	0	2	0	0.831074	1	1	1
biological_process	GO:0070863	positive regulation of protein exit from endoplasmic reticulum	0	2	0	0.831074	1	1	1
biological_process	GO:0003400	regulation of COPII vesicle coating	0	1	0	0.911645	1	1	1
biological_process	GO:0016050	vesicle organization	0	4	0	0.51875	0.811637	1	1
cellular_component	GO:0032541	cortical endoplasmic reticulum	0	3	0	0.680991	1	1	1
biological_process	GO:0048309	endoplasmic reticulum inheritance	0	1	0	0.911645	1	1	1
biological_process	GO:0016320	endoplasmic reticulum membrane fusion	0	1	0	0.911645	1	1	1
molecular_function	GO:0004019	adenylosuccinate synthase activity	0	1	0	0.918177	1	1	1
molecular_function	GO:0016208	AMP binding	0	4	0	0.71066	1	1	1
molecular_function	GO:0003688	DNA replication origin binding	0	10	0	0.425537	1	1	1
molecular_function	GO:0019002	GMP binding	0	1	0	0.918177	1	1	1
molecular_function	GO:0061483	sulfinylpropanyl adenylate synthase	0	1	0	0.918177	1	1	1
biological_process	GO:0044208	'de novo' AMP biosynthetic process	0	2	0	0.831074	1	1	1
biological_process	GO:0071276	cellular response to cadmium ion	0	1	0	0.992217	0.168926	1	1
biological_process	GO:0006106	fumarate metabolic process	0	3	0	0.690606	1	1	1
cellular_component	GO:0090575	RNA polymerase II transcription regulator complex	0	1	0	0.967993	0.0946345	1	1
molecular_function	GO:0102339	3-oxo-arachidoyl-CoA reductase activity	0	1	0	0.918177	1	1	1
molecular_function	GO:0102340	3-oxo-behenoyl-CoA reductase activity	0	1	0	0.918177	1	1	1
molecular_function	GO:0102342	3-oxo-cerotoyl-CoA reductase activity	0	1	0	0.918177	1	1	1
molecular_function	GO:0102341	3-oxo-lignoceroyl-CoA reductase activity	0	1	0	0.918177	1	1	1
molecular_function	GO:0045703	ketoreductase activity	0	1	0	0.918177	1	1	1
biological_process	GO:0030497	fatty acid elongation	0	1	0	0.911645	1	1	1
cellular_component	GO:0031251	PAN complex	0	2	0	0.825259	1	1	1
cellular_component	GO:0009349	riboflavin synthase complex	0	1	0	0.908448	1	1	1
molecular_function	GO:0000906	6,7-dimethyl-8-ribityllumazine synthase activity	0	1	0	0.918177	1	1	1
biological_process	GO:0006879	cellular iron ion homeostasis	0	8	0	0.434504	1	1	1
biological_process	GO:0050821	protein stabilization	0	4	0	0.690606	1	1	1
biological_process	GO:0000469	cleavage involved in rRNA processing	0	3	0	0.242293	0.93842	1	1
cellular_component	GO:0036266	Cdc48p-Npl4p-Vms1p AAA ATPase complex	0	1	0	0.908448	1	1	1
cellular_component	GO:0000837	Doa10p ubiquitin ligase complex	0	2	0	0.825259	1	1	1
cellular_component	GO:0000839	Hrd1p ubiquitin ligase ERAD-L complex	0	2	0	0.825259	1	1	1
cellular_component	GO:0042175	nuclear outer membrane-endoplasmic reticulum membrane network	0	4	0	0.275874	0.816439	1	1
cellular_component	GO:0048471	perinuclear region of cytoplasm	0	2	0	0.90207	0.438107	1	1
cellular_component	GO:0030894	replisome	0	1	0	0.618589	1	1	1
cellular_component	GO:1990112	RQC complex	0	2	0	0.825259	1	1	1
cellular_component	GO:0034098	VCP-NPL4-UFD1 AAA ATPase complex	0	1	0	0.908448	1	1	1
biological_process	GO:0071629	cytoplasm protein quality control by the ubiquitin-proteasome system	0	4	0	0.690606	1	1	1
biological_process	GO:0006274	DNA replication termination	0	1	0	0.831074	1	1	1
biological_process	GO:0071712	ER-associated misfolded protein catabolic process	0	1	0	0.911645	1	1	1
biological_process	GO:0051228	mitotic spindle disassembly	0	2	0	0.831074	1	1	1
biological_process	GO:0051974	negative regulation of telomerase activity	0	1	0	0.911645	1	1	1
biological_process	GO:0070651	nonfunctional rRNA decay	0	4	0	0.690606	1	1	1
biological_process	GO:1900182	positive regulation of protein localization to nucleus	0	2	0	0.831074	1	1	1
biological_process	GO:0072665	protein localization to vacuole	0	2	0	0.791417	0.48125	1	1
biological_process	GO:0030970	retrograde protein transport, ER to cytosol	0	2	0	0.831074	1	1	1
molecular_function	GO:0008686	3,4-dihydroxy-2-butanone-4-phosphate synthase activity	0	1	0	0.918177	1	1	1
molecular_function	GO:0015187	glycine transmembrane transporter activity	0	1	0	0.918177	1	1	1
biological_process	GO:1904983	glycine import into mitochondrion	0	1	0	0.911645	1	1	1
biological_process	GO:0006783	heme biosynthetic process	0	3	0	0.248946	1	1	1
cellular_component	GO:0061700	GATOR2 complex	0	1	0	0.908448	1	1	1
cellular_component	GO:0031080	nuclear pore outer ring	0	3	0	0.749671	1	1	1
biological_process	GO:0051664	nuclear pore localization	0	1	0	0.911645	1	1	1
biological_process	GO:0043547	positive regulation of GTPase activity	0	5	0	0.523028	1	1	1
biological_process	GO:1904263	positive regulation of TORC1 signaling	0	2	0	0.831074	1	1	1
molecular_function	GO:0030411	scytalone dehydratase activity	0	1	0	0.918177	1	1	1
biological_process	GO:0042438	melanin biosynthetic process	0	4	0	0.690606	1	1	1
molecular_function	GO:0008531	riboflavin kinase activity	0	2	0	0.843034	1	1	1
biological_process	GO:0009398	FMN biosynthetic process	0	2	0	0.831074	1	1	1
biological_process	GO:0042149	cellular response to glucose starvation	0	1	0	0.911645	1	1	1
molecular_function	GO:0047834	D-threo-aldose 1-dehydrogenase activity	0	24	0	0.128301	1	1	1
cellular_component	GO:0033557	Slx1-Slx4 complex	0	2	0	0.825259	1	1	1
molecular_function	GO:0070039	rRNA (guanosine-2'-O-)-methyltransferase activity	0	1	0	0.918177	1	1	1
molecular_function	GO:0008650	rRNA (uridine-2'-O-)-methyltransferase activity	0	2	0	0.843034	1	1	1
biological_process	GO:0000453	enzyme-directed rRNA 2'-O-methylation	0	1	0	0.911645	1	1	1
cellular_component	GO:0005875	microtubule associated complex	0	1	0	0.260205	1	1	1
cellular_component	GO:0000922	spindle pole	0	6	0	0.561893	1	1	1
molecular_function	GO:0070840	dynein complex binding	0	1	0	0.918177	1	1	1
biological_process	GO:0000132	establishment of mitotic spindle orientation	0	1	0	0.911645	1	1	1
biological_process	GO:0051012	microtubule sliding	0	1	0	0.911645	1	1	1
biological_process	GO:0000028	ribosomal small subunit assembly	0	1	0	0.831074	1	1	1
biological_process	GO:1903097	regulation of CENP-A containing nucleosome assembly	0	2	0	0.831074	1	1	1
cellular_component	GO:0005615	extracellular space	0	13	0	0.286511	1	1	1
cellular_component	GO:0005761	mitochondrial ribosome	0	2	0	0.145933	1	1	1
molecular_function	GO:0043495	protein-membrane adaptor activity	0	2	0	0.774029	1	1	1
biological_process	GO:0007091	metaphase/anaphase transition of mitotic cell cycle	0	1	0	0.612473	0.751054	1	1
biological_process	GO:0071630	nuclear protein quality control by the ubiquitin-proteasome system	0	1	0	0.911645	1	1	1
biological_process	GO:0031144	proteasome localization	0	1	0	0.911645	1	1	1
cellular_component	GO:0033116	endoplasmic reticulum-Golgi intermediate compartment membrane	0	1	0	0.908448	1	1	1
biological_process	GO:0070072	vacuolar proton-transporting V-type ATPase complex assembly	0	4	0	0.690606	1	1	1
biological_process	GO:0071467	cellular response to pH	0	1	0	0.831074	1	1	1
molecular_function	GO:0051020	GTPase binding	0	1	0	0.821813	0.440056	1	1
biological_process	GO:0006354	DNA-templated transcription, elongation	0	2	0	0.0560918	1	0.996	1
molecular_function	GO:0046570	methylthioribulose 1-phosphate dehydratase activity	0	1	0	0.918177	1	1	1
molecular_function	GO:0032866	D-xylose:NADP reductase activity	0	1	0	0.918177	1	1	1
biological_process	GO:0042843	D-xylose catabolic process	0	1	0	0.911645	1	1	1
molecular_function	GO:0000049	tRNA binding	0	18	0	0.180779	1	1	1
biological_process	GO:0071528	tRNA re-export from nucleus	0	1	0	0.911645	1	1	1
cellular_component	GO:0031305	integral component of mitochondrial inner membrane	0	4	0	0.837977	0.536417	1	1
molecular_function	GO:0047039	tetrahydroxynaphthalene reductase activity	0	1	0	0.918177	1	1	1
molecular_function	GO:0061605	molybdopterin-synthase adenylyltransferase activity	0	1	0	0.918177	1	1	1
molecular_function	GO:0061604	molybdopterin-synthase sulfurtransferase activity	0	1	0	0.918177	1	1	1
molecular_function	GO:0070733	protein adenylyltransferase activity	0	2	0	0.843034	1	1	1
molecular_function	GO:0004792	thiosulfate sulfurtransferase activity	0	3	0	0.774029	1	1	1
molecular_function	GO:0042292	URM1 activating enzyme activity	0	1	0	0.918177	1	1	1
biological_process	GO:0007114	cell budding	0	1	0	0.934963	0.370483	1	1
biological_process	GO:0032447	protein urmylation	0	5	0	0.629517	1	1	1
biological_process	GO:2000220	regulation of pseudohyphal growth	0	1	0	0.911645	1	1	1
biological_process	GO:0002143	tRNA wobble position uridine thiolation	0	4	0	0.690606	1	1	1
molecular_function	GO:0004555	alpha,alpha-trehalase activity	0	2	0	0.843034	1	1	1
biological_process	GO:0005993	trehalose catabolic process	0	2	0	0.757602	1	1	1
molecular_function	GO:0004865	protein serine/threonine phosphatase inhibitor activity	0	1	0	0.918177	1	1	1
biological_process	GO:0032515	negative regulation of phosphoprotein phosphatase activity	0	1	0	0.911645	1	1	1
molecular_function	GO:0043021	ribonucleoprotein complex binding	0	4	0	0.403995	0.871699	1	1
molecular_function	GO:0061631	ubiquitin conjugating enzyme activity	0	4	0	0.71066	1	1	1
biological_process	GO:0008156	negative regulation of DNA replication	0	1	0	0.908025	0.426184	1	1
cellular_component	GO:0070545	PeBoW complex	0	2	0	0.825259	1	1	1
biological_process	GO:0110136	protein-RNA complex remodeling	0	2	0	0.831074	1	1	1
biological_process	GO:0000730	DNA recombinase assembly	0	2	0	0.831074	1	1	1
biological_process	GO:0045002	double-strand break repair via single-strand annealing	0	1	0	0.911645	1	1	1
molecular_function	GO:0106073	dolichyl pyrophosphate Glc2Man9GlcNAc2 alpha-1,2-glucosyltransferase activity	0	1	0	0.918177	1	1	1
biological_process	GO:0006488	dolichol-linked oligosaccharide biosynthetic process	0	9	0	0.434504	1	1	1
molecular_function	GO:0008120	ceramide glucosyltransferase activity	0	1	0	0.918177	1	1	1
molecular_function	GO:0102769	dihydroceramide glucosyltransferase activity	0	1	0	0.918177	1	1	1
molecular_function	GO:0019776	Atg8 ligase activity	0	1	0	0.918177	1	1	1
biological_process	GO:0006501	C-terminal protein lipidation	0	1	0	0.911645	1	1	1
biological_process	GO:0006612	protein targeting to membrane	0	4	0	0.51875	0.811637	1	1
biological_process	GO:0032974	amino acid transmembrane export from vacuole	0	1	0	0.911645	1	1	1
molecular_function	GO:0046556	alpha-L-arabinofuranosidase activity	0	9	0	0.463528	1	1	1
biological_process	GO:0031222	arabinan catabolic process	0	6	0	0.573816	1	1	1
biological_process	GO:0046373	L-arabinose metabolic process	0	9	0	0.434504	1	1	1
cellular_component	GO:0000421	autophagosome membrane	0	1	0	0.991637	0.174741	1	1
cellular_component	GO:0031410	cytoplasmic vesicle	0	2	0	0.967187	0.0644223	1	0.999
cellular_component	GO:0031314	extrinsic component of mitochondrial inner membrane	0	10	0	0.382439	1	1	1
biological_process	GO:0006744	ubiquinone biosynthetic process	0	10	0	0.746926	0.639078	1	1
biological_process	GO:0051403	stress-activated MAPK cascade	0	2	0	0.476723	1	1	1
cellular_component	GO:0000931	gamma-tubulin large complex	0	1	0	0.908448	1	1	1
cellular_component	GO:0005816	spindle pole body	0	13	0	0.099201	1	0.981	1
biological_process	GO:0033566	gamma-tubulin complex localization	0	1	0	0.911645	1	1	1
molecular_function	GO:0070300	phosphatidic acid binding	0	2	0	0.843034	1	1	1
molecular_function	GO:0080025	phosphatidylinositol-3,5-bisphosphate binding	0	3	0	0.774029	1	1	1
molecular_function	GO:0032266	phosphatidylinositol-3-phosphate binding	0	4	0	0.71066	1	1	1
molecular_function	GO:0070273	phosphatidylinositol-4-phosphate binding	0	5	0	0.652468	1	1	1
biological_process	GO:0070196	eukaryotic translation initiation factor 3 complex assembly	0	1	0	0.911645	1	1	1
molecular_function	GO:0004622	lysophospholipase activity	0	3	0	0.774029	1	1	1
molecular_function	GO:0102545	phosphatidyl phospholipase B activity	0	3	0	0.774029	1	1	1
biological_process	GO:0034638	phosphatidylcholine catabolic process	0	1	0	0.911645	1	1	1
biological_process	GO:0071071	regulation of phospholipid biosynthetic process	0	1	0	0.978018	0.242398	1	1
molecular_function	GO:0003868	4-hydroxyphenylpyruvate dioxygenase activity	0	1	0	0.918177	1	1	1
biological_process	GO:0006559	L-phenylalanine catabolic process	0	6	0	0.573816	1	1	1
biological_process	GO:0006572	tyrosine catabolic process	0	3	0	0.757602	1	1	1
molecular_function	GO:0097177	mitochondrial ribosome binding	0	1	0	0.918177	1	1	1
cellular_component	GO:0031298	replication fork protection complex	0	11	0	0.347349	1	1	1
biological_process	GO:0061587	transfer RNA gene-mediated silencing	0	1	0	0.911645	1	1	1
molecular_function	GO:0004017	adenylate kinase activity	0	4	0	0.71066	1	1	1
biological_process	GO:0006172	ADP biosynthetic process	0	2	0	0.831074	1	1	1
biological_process	GO:0046033	AMP metabolic process	0	2	0	0.573816	1	1	1
biological_process	GO:0046034	ATP metabolic process	0	2	0	0.0125462	1	0.633	1
molecular_function	GO:0030552	cAMP binding	0	1	0	0.918177	1	1	1
molecular_function	GO:0008603	cAMP-dependent protein kinase regulator activity	0	1	0	0.918177	1	1	1
biological_process	GO:0001932	regulation of protein phosphorylation	0	1	0	0.962688	0.140691	1	1
cellular_component	GO:0070693	P-TEFb-cap methyltransferase complex	0	1	0	0.908448	1	1	1
molecular_function	GO:0004482	mRNA (guanine-N7-)-methyltransferase activity	0	1	0	0.918177	1	1	1
molecular_function	GO:0008824	cyanate hydratase activity	0	1	0	0.918177	1	1	1
biological_process	GO:0009439	cyanate metabolic process	0	1	0	0.911645	1	1	1
cellular_component	GO:0009331	glycerol-3-phosphate dehydrogenase complex	0	3	0	0.749671	1	1	1
molecular_function	GO:0004367	glycerol-3-phosphate dehydrogenase [NAD+] activity	0	2	0	0.843034	1	1	1
biological_process	GO:0046168	glycerol-3-phosphate catabolic process	0	3	0	0.757602	1	1	1
molecular_function	GO:0005458	GDP-mannose transmembrane transporter activity	0	1	0	0.918177	1	1	1
biological_process	GO:0008643	carbohydrate transport	0	28	0	0.0676042	1	0.999	1
molecular_function	GO:0070180	large ribosomal subunit rRNA binding	0	4	0	0.71066	1	1	1
molecular_function	GO:0003678	DNA helicase activity	0	8	0	0.733269	0.547827	1	1
molecular_function	GO:0033677	DNA/RNA helicase activity	0	1	0	0.71066	1	1	1
molecular_function	GO:0000334	3-hydroxyanthranilate 3,4-dioxygenase activity	0	1	0	0.918177	1	1	1
molecular_function	GO:0008198	ferrous iron binding	0	5	0	0.652468	1	1	1
molecular_function	GO:0004130	cytochrome-c peroxidase activity	0	1	0	0.918177	1	1	1
biological_process	GO:0000076	DNA replication checkpoint signaling	0	1	0	0.934963	0.370483	1	1
cellular_component	GO:0097361	CIA complex	0	3	0	0.749671	1	1	1
cellular_component	GO:0071006	U2-type catalytic step 1 spliceosome	0	2	0	0.825259	1	1	1
cellular_component	GO:0071007	U2-type catalytic step 2 spliceosome	0	2	0	0.825259	1	1	1
biological_process	GO:0000354	cis assembly of pre-catalytic spliceosome	0	1	0	0.911645	1	1	1
biological_process	GO:0006270	DNA replication initiation	0	13	0	0.580319	0.773145	1	1
cellular_component	GO:0017119	Golgi transport complex	0	4	0	0.680991	1	1	1
biological_process	GO:0071816	tail-anchored membrane protein insertion into ER membrane	0	1	0	0.911645	1	1	1
molecular_function	GO:0005093	Rab GDP-dissociation inhibitor activity	0	1	0	0.918177	1	1	1
molecular_function	GO:0102265	tRNA-dihydrouridine47 synthase activity	0	4	0	0.71066	1	1	1
cellular_component	GO:0009514	glyoxysome	0	1	0	0.908448	1	1	1
molecular_function	GO:0004451	isocitrate lyase activity	0	2	0	0.843034	1	1	1
molecular_function	GO:0046421	methylisocitrate lyase activity	0	2	0	0.843034	1	1	1
biological_process	GO:0006097	glyoxylate cycle	0	2	0	0.831074	1	1	1
biological_process	GO:0019722	calcium-mediated signaling	0	2	0	0.908025	0.426184	1	1
molecular_function	GO:0004358	glutamate N-acetyltransferase activity	0	1	0	0.918177	1	1	1
molecular_function	GO:0004601	peroxidase activity	0	18	0	0.0991889	1	0.998	1
cellular_component	GO:0045009	chitosome	0	1	0	0.908448	1	1	1
biological_process	GO:0030476	ascospore wall assembly	0	3	0	0.757602	1	1	1
biological_process	GO:0034221	fungal-type cell wall chitin biosynthetic process	0	1	0	0.911645	1	1	1
biological_process	GO:0097271	protein localization to bud neck	0	1	0	0.911645	1	1	1
molecular_function	GO:0008239	dipeptidyl-peptidase activity	0	7	0	0.549961	1	1	1
molecular_function	GO:0008236	serine-type peptidase activity	0	15	0	0.0745006	0.979285	0.994	1
molecular_function	GO:0009055	electron transfer activity	0	10	0	0.117755	1	1	1
molecular_function	GO:0004525	ribonuclease III activity	0	7	0	0.549961	1	1	1
biological_process	GO:0051607	defense response to virus	0	3	0	0.757602	1	1	1
biological_process	GO:0050688	regulation of defense response to virus	0	2	0	0.831074	1	1	1
biological_process	GO:0006396	RNA processing	0	17	0	0.810526	0.24825	1	1
molecular_function	GO:0016846	carbon-sulfur lyase activity	0	8	0	0.711538	0.670787	1	1
molecular_function	GO:0004056	argininosuccinate lyase activity	0	1	0	0.918177	1	1	1
biological_process	GO:0042450	arginine biosynthetic process via ornithine	0	3	0	0.757602	1	1	1
molecular_function	GO:0016653	oxidoreductase activity, acting on NAD(P)H, heme protein as acceptor	0	2	0	0.58904	0.766245	1	1
biological_process	GO:0006784	heme A biosynthetic process	0	2	0	0.831074	1	1	1
molecular_function	GO:0017176	phosphatidylinositol N-acetylglucosaminyltransferase activity	0	3	0	0.774029	1	1	1
molecular_function	GO:0005216	ion channel activity	0	3	0	0.359764	0.891925	1	1
biological_process	GO:1902979	mitotic DNA replication termination	0	1	0	0.911645	1	1	1
molecular_function	GO:0008233	peptidase activity	0	20	0	0.0467676	0.973671	0.93	1
molecular_function	GO:0003878	ATP citrate synthase activity	0	2	0	0.843034	1	1	1
biological_process	GO:0008299	isoprenoid biosynthetic process	0	9	0	0.383783	0.881724	1	1
cellular_component	GO:0030126	COPI vesicle coat	0	6	0	0.561893	1	1	1
molecular_function	GO:0003714	transcription corepressor activity	0	5	0	0.652468	1	1	1
biological_process	GO:0006414	translational elongation	0	1	0	0.461354	0.843616	1	1
molecular_function	GO:1990663	dihydroorotate dehydrogenase (fumarate) activity	0	1	0	0.918177	1	1	1
biological_process	GO:0044205	'de novo' UMP biosynthetic process	0	6	0	0.573816	1	1	1
biological_process	GO:0006807	nitrogen compound metabolic process	0	13	0	0.990982	0.0124088	1	0.996
molecular_function	GO:0004144	diacylglycerol O-acyltransferase activity	0	2	0	0.843034	1	1	1
biological_process	GO:0006071	glycerol metabolic process	0	1	0	0.629517	1	1	1
biological_process	GO:0019432	triglyceride biosynthetic process	0	3	0	0.757602	1	1	1
molecular_function	GO:0015293	symporter activity	0	7	0	0.504903	1	1	1
molecular_function	GO:0004061	arylformamidase activity	0	4	0	0.71066	1	1	1
molecular_function	GO:0008483	transaminase activity	0	9	0	0.128301	1	1	1
molecular_function	GO:0016158	3-phytase activity	0	8	0	0.504903	1	1	1
cellular_component	GO:0000776	kinetochore	0	13	0	0.450269	0.790819	1	1
cellular_component	GO:0033597	mitotic checkpoint complex	0	1	0	0.908448	1	1	1
cellular_component	GO:1990498	mitotic spindle microtubule	0	1	0	0.908448	1	1	1
cellular_component	GO:0044732	mitotic spindle pole body	0	5	0	0.421066	1	1	1
molecular_function	GO:0010997	anaphase-promoting complex binding	0	4	0	0.71066	1	1	1
biological_process	GO:1905318	meiosis I spindle assembly checkpoint signaling	0	1	0	0.911645	1	1	1
biological_process	GO:0007094	mitotic spindle assembly checkpoint signaling	0	4	0	0.573816	1	1	1
biological_process	GO:0009306	protein secretion	0	1	0	0.831074	1	1	1
cellular_component	GO:0000813	ESCRT I complex	0	2	0	0.825259	1	1	1
molecular_function	GO:0044877	protein-containing complex binding	0	4	0	0.652348	0.515587	1	1
molecular_function	GO:0052692	raffinose alpha-galactosidase activity	0	7	0	0.549961	1	1	1
molecular_function	GO:0003755	peptidyl-prolyl cis-trans isomerase activity	0	17	0	0.233755	1	1	1
biological_process	GO:0030488	tRNA methylation	0	3	0	0.523028	1	1	1
molecular_function	GO:0004343	glucosamine 6-phosphate N-acetyltransferase activity	0	3	0	0.774029	1	1	1
biological_process	GO:0006048	UDP-N-acetylglucosamine biosynthetic process	0	5	0	0.629517	1	1	1
molecular_function	GO:0004364	glutathione transferase activity	0	5	0	0.652468	1	1	1
biological_process	GO:0006749	glutathione metabolic process	0	16	0	0.337853	0.901831	1	1
molecular_function	GO:0016779	nucleotidyltransferase activity	0	7	0	0.0397848	0.990166	0.876	1
molecular_function	GO:0003917	DNA topoisomerase type I (single strand cut, ATP-independent) activity	0	2	0	0.843034	1	1	1
biological_process	GO:0006265	DNA topological change	0	3	0	0.757602	1	1	1
molecular_function	GO:0004354	glutamate dehydrogenase (NADP+) activity	0	1	0	0.918177	1	1	1
biological_process	GO:0006520	cellular amino acid metabolic process	0	8	0	0.000464814	0.999884	0.029	1
molecular_function	GO:0015267	channel activity	0	6	0	0.206622	0.9501	1	1
cellular_component	GO:0031390	Ctf18 RFC-like complex	0	4	0	0.680991	1	1	1
cellular_component	GO:0000923	equatorial microtubule organizing center	0	3	0	0.749671	1	1	1
cellular_component	GO:0000930	gamma-tubulin complex	0	3	0	0.680991	1	1	1
cellular_component	GO:0061496	half bridge of mitotic spindle pole body	0	3	0	0.749671	1	1	1
cellular_component	GO:0061497	inner plaque of mitotic spindle pole body	0	3	0	0.749671	1	1	1
cellular_component	GO:0031021	interphase microtubule organizing center	0	2	0	0.825259	1	1	1
cellular_component	GO:0005637	nuclear inner membrane	0	5	0	0.463583	1	1	1
cellular_component	GO:0071957	old mitotic spindle pole body	0	3	0	0.749671	1	1	1
cellular_component	GO:0061499	outer plaque of mitotic spindle pole body	0	1	0	0.908448	1	1	1
biological_process	GO:0031122	cytoplasmic microtubule organization	0	4	0	0.690606	1	1	1
biological_process	GO:0007020	microtubule nucleation	0	6	0	0.573816	1	1	1
biological_process	GO:1902408	mitotic cytokinesis, site selection	0	2	0	0.831074	1	1	1
biological_process	GO:0051256	mitotic spindle midzone assembly	0	1	0	0.911645	1	1	1
biological_process	GO:1902626	assembly of large subunit precursor of preribosome	0	6	0	0.573816	1	1	1
biological_process	GO:0000054	ribosomal subunit export from nucleus	0	5	0	0.859309	0.387527	1	1
biological_process	GO:0000375	RNA splicing, via transesterification reactions	0	1	0	0.737397	0.423179	1	1
cellular_component	GO:0005826	actomyosin contractile ring	0	1	0	0.510382	1	1	1
biological_process	GO:0000920	septum digestion after cytokinesis	0	2	0	0.690606	1	1	1
molecular_function	GO:0019104	DNA N-glycosylase activity	0	1	0	0.919653	0.400969	1	1
molecular_function	GO:0015099	nickel cation transmembrane transporter activity	0	2	0	0.843034	1	1	1
molecular_function	GO:0003847	1-alkyl-2-acetylglycerophosphocholine esterase activity	0	2	0	0.843034	1	1	1
molecular_function	GO:0016747	acyltransferase activity, transferring groups other than amino-acyl groups	0	22	0	0.0212453	0.99309	0.664	1
molecular_function	GO:0004107	chorismate synthase activity	0	1	0	0.918177	1	1	1
molecular_function	GO:0042602	riboflavin reductase (NADPH) activity	0	1	0	0.918177	1	1	1
cellular_component	GO:0005950	anthranilate synthase complex	0	1	0	0.908448	1	1	1
molecular_function	GO:0004049	anthranilate synthase activity	0	2	0	0.843034	1	1	1
biological_process	GO:0000162	tryptophan biosynthetic process	0	3	0	0.757602	1	1	1
cellular_component	GO:0015630	microtubule cytoskeleton	0	1	0	0.0307091	0.992773	0.636	1
cellular_component	GO:0031500	Tea1 cell-end complex	0	1	0	0.908448	1	1	1
biological_process	GO:0051519	activation of bipolar cell growth	0	1	0	0.911645	1	1	1
biological_process	GO:0042815	bipolar cell growth	0	1	0	0.911645	1	1	1
biological_process	GO:0030010	establishment of cell polarity	0	3	0	0.878541	0.476972	1	1
biological_process	GO:0007163	establishment or maintenance of cell polarity	0	2	0	0.953453	0.139546	1	1
molecular_function	GO:0019706	protein-cysteine S-palmitoyltransferase activity	0	6	0	0.599031	1	1	1
molecular_function	GO:0004043	L-aminoadipate-semialdehyde dehydrogenase activity	0	1	0	0.918177	1	1	1
molecular_function	GO:0015204	urea transmembrane transporter activity	0	2	0	0.843034	1	1	1
molecular_function	GO:0003691	double-stranded telomeric DNA binding	0	2	0	0.843034	1	1	1
cellular_component	GO:0008180	COP9 signalosome	0	7	0	0.510382	1	1	1
biological_process	GO:0000338	protein deneddylation	0	5	0	0.629517	1	1	1
cellular_component	GO:0098826	endoplasmic reticulum tubular network membrane	0	1	0	0.908448	1	1	1
biological_process	GO:0071788	endoplasmic reticulum tubular network maintenance	0	1	0	0.911645	1	1	1
biological_process	GO:1903373	positive regulation of endoplasmic reticulum tubular network organization	0	1	0	0.911645	1	1	1
molecular_function	GO:0004356	glutamate-ammonia ligase activity	0	3	0	0.774029	1	1	1
biological_process	GO:0006542	glutamine biosynthetic process	0	3	0	0.757602	1	1	1
cellular_component	GO:0015934	large ribosomal subunit	0	8	0	0.0504399	1	0.857	1
cellular_component	GO:0042788	polysomal ribosome	0	2	0	0.825259	1	1	1
cellular_component	GO:0015935	small ribosomal subunit	0	5	0	0.120324	1	0.998	1
biological_process	GO:0071409	cellular response to cycloheximide	0	1	0	0.911645	1	1	1
biological_process	GO:0060548	negative regulation of cell death	0	3	0	0.757602	1	1	1
biological_process	GO:0036003	positive regulation of transcription from RNA polymerase II promoter in response to stress	0	1	0	0.978018	0.242398	1	1
biological_process	GO:0006452	translational frameshifting	0	2	0	0.757602	1	1	1
molecular_function	GO:0004060	arylamine N-acetyltransferase activity	0	2	0	0.843034	1	1	1
molecular_function	GO:0016209	antioxidant activity	0	1	0	0.0420179	1	0.898	1
cellular_component	GO:0017054	negative cofactor 2 complex	0	1	0	0.908448	1	1	1
molecular_function	GO:0001046	core promoter sequence-specific DNA binding	0	1	0	0.652468	1	1	1
molecular_function	GO:0140223	general transcription initiation factor activity	0	1	0	0.652468	1	1	1
molecular_function	GO:0003713	transcription coactivator activity	0	5	0	0.652468	1	1	1
biological_process	GO:0017055	negative regulation of RNA polymerase II transcription preinitiation complex assembly	0	1	0	0.911645	1	1	1
biological_process	GO:0016480	negative regulation of transcription by RNA polymerase III	0	2	0	0.831074	1	1	1
biological_process	GO:0061408	positive regulation of transcription from RNA polymerase II promoter in response to heat stress	0	1	0	0.911645	1	1	1
molecular_function	GO:0019843	rRNA binding	0	13	0	0.128301	1	1	1
biological_process	GO:0007531	mating type determination	0	1	0	0.934963	0.370483	1	1
cellular_component	GO:0000220	vacuolar proton-transporting V-type ATPase, V0 domain	0	4	0	0.680991	1	1	1
molecular_function	GO:0015078	proton transmembrane transporter activity	0	11	0	0.11402	0.976992	1	1
molecular_function	GO:0003854	3-beta-hydroxy-delta5-steroid dehydrogenase activity	0	4	0	0.71066	1	1	1
biological_process	GO:0006694	steroid biosynthetic process	0	4	0	0.408481	0.87018	1	1
molecular_function	GO:0005324	long-chain fatty acid transporter activity	0	2	0	0.843034	1	1	1
molecular_function	GO:0004467	long-chain fatty acid-CoA ligase activity	0	2	0	0.843034	1	1	1
molecular_function	GO:0000009	alpha-1,6-mannosyltransferase activity	0	7	0	0.504903	1	1	1
biological_process	GO:1901135	carbohydrate derivative metabolic process	0	10	0	2.21979e-05	0.999995	0.001	1
molecular_function	GO:0033961	cis-stilbene-oxide hydrolase activity	0	4	0	0.71066	1	1	1
biological_process	GO:0006826	iron ion transport	0	6	0	0.396013	1	1	1
molecular_function	GO:0008865	fructokinase activity	0	1	0	0.918177	1	1	1
molecular_function	GO:0004340	glucokinase activity	0	2	0	0.843034	1	1	1
molecular_function	GO:0005536	glucose binding	0	4	0	0.71066	1	1	1
molecular_function	GO:0019158	mannokinase activity	0	1	0	0.918177	1	1	1
biological_process	GO:0001678	cellular glucose homeostasis	0	4	0	0.780921	0.603987	1	1
biological_process	GO:0006002	fructose 6-phosphate metabolic process	0	2	0	0.831074	1	1	1
biological_process	GO:0019660	glycolytic fermentation	0	1	0	0.911645	1	1	1
biological_process	GO:0006096	glycolytic process	0	14	0	0.226855	1	1	1
biological_process	GO:0006013	mannose metabolic process	0	4	0	0.690606	1	1	1
cellular_component	GO:0043231	intracellular membrane-bounded organelle	0	7	0	1	4.38066e-08	1	0
biological_process	GO:0009060	aerobic respiration	0	4	0	0.226322	0.91792	1	1
molecular_function	GO:0050291	sphingosine N-acyltransferase activity	0	2	0	0.843034	1	1	1
biological_process	GO:0046513	ceramide biosynthetic process	0	2	0	0.831074	1	1	1
molecular_function	GO:0003885	D-arabinono-1,4-lactone oxidase activity	0	2	0	0.843034	1	1	1
biological_process	GO:0070485	dehydro-D-arabinono-1,4-lactone biosynthetic process	0	2	0	0.831074	1	1	1
cellular_component	GO:0005938	cell cortex	0	5	0	0.750878	0.407302	1	1
molecular_function	GO:0005543	phospholipid binding	0	5	0	0.999802	0.000883543	1	0.185
biological_process	GO:0032065	maintenance of protein location in cell cortex	0	2	0	0.831074	1	1	1
molecular_function	GO:0016279	protein-lysine N-methyltransferase activity	0	6	0	0.329213	1	1	1
biological_process	GO:0018023	peptidyl-lysine trimethylation	0	2	0	0.831074	1	1	1
molecular_function	GO:0030600	feruloyl esterase activity	0	13	0	0.329213	1	1	1
molecular_function	GO:0016857	racemase and epimerase activity, acting on carbohydrates and derivatives	0	1	0	0.71066	1	1	1
molecular_function	GO:0015095	magnesium ion transmembrane transporter activity	0	7	0	0.549961	1	1	1
molecular_function	GO:0004650	polygalacturonase activity	0	4	0	0.71066	1	1	1
biological_process	GO:0009437	carnitine metabolic process	0	1	0	0.831074	1	1	1
biological_process	GO:0006631	fatty acid metabolic process	0	3	0	0.543649	0.656779	1	1
molecular_function	GO:0008379	thioredoxin peroxidase activity	0	3	0	0.774029	1	1	1
biological_process	GO:0045454	cell redox homeostasis	0	5	0	0.629517	1	1	1
molecular_function	GO:0004375	glycine dehydrogenase (decarboxylating) activity	0	2	0	0.843034	1	1	1
biological_process	GO:0006546	glycine catabolic process	0	2	0	0.757602	1	1	1
biological_process	GO:0045860	positive regulation of protein kinase activity	0	1	0	0.690606	1	1	1
biological_process	GO:0051726	regulation of cell cycle	0	4	0	0.937208	0.121322	1	1
biological_process	GO:0006850	mitochondrial pyruvate transmembrane transport	0	3	0	0.757602	1	1	1
molecular_function	GO:0102098	D-galacturonate reductase activity	0	1	0	0.918177	1	1	1
biological_process	GO:0019698	D-galacturonate catabolic process	0	1	0	0.911645	1	1	1
cellular_component	GO:0045263	proton-transporting ATP synthase complex, coupling factor F(o)	0	3	0	0.382439	1	1	1
biological_process	GO:0015986	ATP synthesis coupled proton transport	0	7	0	0.434504	1	1	1
molecular_function	GO:0008080	N-acetyltransferase activity	0	26	0	0.0193678	1	0.626	1
cellular_component	GO:0000329	fungal-type vacuole membrane	0	29	0	0.224735	0.944439	1	1
biological_process	GO:0042144	vacuole fusion, non-autophagic	0	6	0	0.523028	1	1	1
cellular_component	GO:0005801	cis-Golgi network	0	4	0	0.680991	1	1	1
cellular_component	GO:0031201	SNARE complex	0	5	0	0.618589	1	1	1
biological_process	GO:0090083	regulation of inclusion body assembly	0	1	0	0.911645	1	1	1
molecular_function	GO:0047657	alpha-1,3-glucan synthase activity	0	1	0	0.918177	1	1	1
molecular_function	GO:0050483	IMP 5'-nucleotidase activity	0	1	0	0.918177	1	1	1
biological_process	GO:0006190	inosine salvage	0	1	0	0.911645	1	1	1
molecular_function	GO:0004807	triose-phosphate isomerase activity	0	2	0	0.843034	1	1	1
cellular_component	GO:0005666	RNA polymerase III complex	0	15	0	0.236309	1	1	1
molecular_function	GO:0001056	RNA polymerase III activity	0	10	0	0.425537	1	1	1
biological_process	GO:0006386	termination of RNA polymerase III transcription	0	10	0	0.396013	1	1	1
biological_process	GO:0006384	transcription initiation from RNA polymerase III promoter	0	13	0	0.273181	1	1	1
biological_process	GO:0042779	tRNA 3'-trailer cleavage	0	1	0	0.911645	1	1	1
biological_process	GO:0042797	tRNA transcription by RNA polymerase III	0	11	0	0.360922	1	1	1
cellular_component	GO:1990143	CoA-synthesizing protein complex	0	1	0	0.908448	1	1	1
molecular_function	GO:0004632	phosphopantothenate--cysteine ligase activity	0	1	0	0.918177	1	1	1
biological_process	GO:1990181	acetyl-CoA biosynthetic process from pantothenate	0	1	0	0.911645	1	1	1
biological_process	GO:0015937	coenzyme A biosynthetic process	0	3	0	0.757602	1	1	1
molecular_function	GO:0004462	lactoylglutathione lyase activity	0	2	0	0.843034	1	1	1
biological_process	GO:0006120	mitochondrial electron transport, NADH to ubiquinone	0	2	0	0.831074	1	1	1
molecular_function	GO:0050661	NADP binding	0	29	0	0.0835441	1	0.997	1
molecular_function	GO:0003959	NADPH dehydrogenase activity	0	2	0	0.843034	1	1	1
molecular_function	GO:0003958	NADPH-hemoprotein reductase activity	0	6	0	0.599031	1	1	1
biological_process	GO:0006696	ergosterol biosynthetic process	0	8	0	0.81447	0.565496	1	1
molecular_function	GO:0046899	nucleoside triphosphate adenylate kinase activity	0	1	0	0.918177	1	1	1
biological_process	GO:0046039	GTP metabolic process	0	1	0	0.831074	1	1	1
biological_process	GO:0046041	ITP metabolic process	0	1	0	0.911645	1	1	1
molecular_function	GO:0016780	phosphotransferase activity, for other substituted phosphate groups	0	4	0	0.329213	1	1	1
biological_process	GO:0008654	phospholipid biosynthetic process	0	7	0	0.023635	0.996636	0.821	1
cellular_component	GO:0016442	RISC complex	0	1	0	0.908448	1	1	1
cellular_component	GO:0005777	peroxisome	0	13	0	0.180896	0.958432	1	1
cellular_component	GO:0000178	exosome (RNase complex)	0	1	0	0.347349	1	1	1
molecular_function	GO:0004527	exonuclease activity	0	10	0	0.485766	0.765342	1	1
molecular_function	GO:0004197	cysteine-type endopeptidase activity	0	3	0	0.968521	0.1641	1	1
cellular_component	GO:0008278	cohesin complex	0	3	0	0.749671	1	1	1
biological_process	GO:0007062	sister chromatid cohesion	0	4	0	0.549046	0.793282	1	1
molecular_function	GO:0008897	holo-[acyl-carrier-protein] synthase activity	0	3	0	0.774029	1	1	1
molecular_function	GO:0003991	acetylglutamate kinase activity	0	1	0	0.918177	1	1	1
molecular_function	GO:0003942	N-acetyl-gamma-glutamyl-phosphate reductase activity	0	1	0	0.918177	1	1	1
molecular_function	GO:0016992	lipoate synthase activity	0	1	0	0.918177	1	1	1
molecular_function	GO:0102552	lipoyl synthase activity (acting on glycine-cleavage complex H protein	0	1	0	0.918177	1	1	1
molecular_function	GO:0102553	lipoyl synthase activity (acting on pyruvate dehydrogenase E2 protein)	0	1	0	0.918177	1	1	1
biological_process	GO:0009249	protein lipoylation	0	3	0	0.757602	1	1	1
molecular_function	GO:0004351	glutamate decarboxylase activity	0	2	0	0.843034	1	1	1
biological_process	GO:0006536	glutamate metabolic process	0	3	0	0.523028	1	1	1
molecular_function	GO:0004851	uroporphyrin-III C-methyltransferase activity	0	1	0	0.918177	1	1	1
biological_process	GO:0019354	siroheme biosynthetic process	0	2	0	0.831074	1	1	1
biological_process	GO:0000103	sulfate assimilation	0	6	0	0.523028	1	1	1
molecular_function	GO:0005375	copper ion transmembrane transporter activity	0	9	0	0.463528	1	1	1
biological_process	GO:0018279	protein N-linked glycosylation via asparagine	0	1	0	0.911645	1	1	1
molecular_function	GO:0008441	3'(2'),5'-bisphosphate nucleotidase activity	0	1	0	0.918177	1	1	1
molecular_function	GO:0052829	inositol-1,3,4-trisphosphate 1-phosphatase activity	0	1	0	0.918177	1	1	1
molecular_function	GO:0004441	inositol-1,4-bisphosphate 1-phosphatase activity	0	1	0	0.918177	1	1	1
biological_process	GO:0042538	hyperosmotic salinity response	0	1	0	0.911645	1	1	1
biological_process	GO:0046855	inositol phosphate dephosphorylation	0	4	0	0.690606	1	1	1
biological_process	GO:0009086	methionine biosynthetic process	0	9	0	0.206718	1	1	1
biological_process	GO:0046854	phosphatidylinositol phosphate biosynthetic process	0	3	0	0.757602	1	1	1
cellular_component	GO:0005762	mitochondrial large ribosomal subunit	0	11	0	0.347349	1	1	1
cellular_component	GO:0008250	oligosaccharyltransferase complex	0	3	0	0.749671	1	1	1
biological_process	GO:0006487	protein N-linked glycosylation	0	5	0	0.248946	1	1	1
molecular_function	GO:0004822	isoleucine-tRNA ligase activity	0	3	0	0.774029	1	1	1
biological_process	GO:0006418	tRNA aminoacylation for protein translation	0	3	0	0.0320169	1	0.936	1
molecular_function	GO:0004181	metallocarboxypeptidase activity	0	11	0	0.390653	1	1	1
biological_process	GO:0006271	DNA strand elongation involved in DNA replication	0	7	0	0.549046	0.793282	1	1
biological_process	GO:0007097	nuclear migration	0	1	0	0.629517	1	1	1
biological_process	GO:0000183	rDNA heterochromatin assembly	0	5	0	0.629517	1	1	1
biological_process	GO:0000019	regulation of mitotic recombination	0	2	0	0.690606	1	1	1
biological_process	GO:0009303	rRNA transcription	0	1	0	0.328931	1	1	1
molecular_function	GO:0010484	H3 histone acetyltransferase activity	0	1	0	0.843034	1	1	1
biological_process	GO:0043618	regulation of transcription from RNA polymerase II promoter in response to stress	0	2	0	0.908025	0.426184	1	1
molecular_function	GO:0000246	delta24(24-1) sterol reductase activity	0	1	0	0.918177	1	1	1
molecular_function	GO:0003697	single-stranded DNA binding	0	21	0	0.0910318	1	0.998	1
biological_process	GO:1901255	nucleotide-excision repair involved in interstrand cross-link repair	0	1	0	0.911645	1	1	1
cellular_component	GO:1990023	mitotic spindle midzone	0	6	0	0.561893	1	1	1
biological_process	GO:0061163	endoplasmic reticulum polarization	0	2	0	0.831074	1	1	1
biological_process	GO:0051306	mitotic sister chromatid separation	0	1	0	0.580319	0.773145	1	1
biological_process	GO:0034067	protein localization to Golgi apparatus	0	4	0	0.434504	1	1	1
molecular_function	GO:0004499	N,N-dimethylaniline monooxygenase activity	0	14	0	0.30221	1	1	1
molecular_function	GO:0045174	glutathione dehydrogenase (ascorbate) activity	0	1	0	0.918177	1	1	1
molecular_function	GO:0008519	ammonium transmembrane transporter activity	0	4	0	0.71066	1	1	1
cellular_component	GO:0043226	organelle	0	1	0	0.999998	3.2315e-06	1	0
molecular_function	GO:0003987	acetate-CoA ligase activity	0	2	0	0.843034	1	1	1
biological_process	GO:0019427	acetyl-CoA biosynthetic process from acetate	0	2	0	0.831074	1	1	1
cellular_component	GO:0005664	nuclear origin of replication recognition complex	0	3	0	0.749671	1	1	1
biological_process	GO:1902969	mitotic DNA replication	0	3	0	0.645384	0.726819	1	1
cellular_component	GO:0032300	mismatch repair complex	0	5	0	0.618589	1	1	1
biological_process	GO:0101030	tRNA-guanine transglycosylation	0	3	0	0.757602	1	1	1
molecular_function	GO:0004853	uroporphyrinogen decarboxylase activity	0	1	0	0.918177	1	1	1
biological_process	GO:0006782	protoporphyrinogen IX biosynthetic process	0	7	0	0.523028	1	1	1
cellular_component	GO:0030134	COPII-coated ER to Golgi transport vesicle	0	6	0	0.847811	0.405246	1	1
molecular_function	GO:0097020	COPII receptor activity	0	1	0	0.918177	1	1	1
biological_process	GO:0045053	protein retention in Golgi apparatus	0	5	0	0.629517	1	1	1
biological_process	GO:0006857	oligopeptide transport	0	4	0	0.908025	0.426184	1	1
molecular_function	GO:0000309	nicotinamide-nucleotide adenylyltransferase activity	0	2	0	0.843034	1	1	1
biological_process	GO:0009435	NAD biosynthetic process	0	5	0	0.396013	1	1	1
biological_process	GO:0051260	protein homooligomerization	0	4	0	0.690606	1	1	1
biological_process	GO:1903259	exon-exon junction complex disassembly	0	1	0	0.911645	1	1	1
molecular_function	GO:0003910	DNA ligase (ATP) activity	0	4	0	0.71066	1	1	1
biological_process	GO:0043386	mycotoxin biosynthetic process	0	14	0	0.248946	1	1	1
biological_process	GO:0009166	nucleotide catabolic process	0	3	0	0.573816	1	1	1
cellular_component	GO:0005788	endoplasmic reticulum lumen	0	4	0	0.618589	1	1	1
molecular_function	GO:0003980	UDP-glucose:glycoprotein glucosyltransferase activity	0	1	0	0.918177	1	1	1
molecular_function	GO:0008061	chitin binding	0	34	0	0.0543776	1	0.96	1
molecular_function	GO:0070181	small ribosomal subunit rRNA binding	0	2	0	0.843034	1	1	1
biological_process	GO:0045903	positive regulation of translational fidelity	0	2	0	0.831074	1	1	1
biological_process	GO:0006407	rRNA export from nucleus	0	4	0	0.690606	1	1	1
biological_process	GO:0006038	cell wall chitin biosynthetic process	0	1	0	0.831074	1	1	1
biological_process	GO:0051382	kinetochore assembly	0	5	0	0.908025	0.426184	1	1
molecular_function	GO:0016627	oxidoreductase activity, acting on the CH-CH group of donors	0	9	0	0.35291	0.850896	1	1
molecular_function	GO:0004378	GDP-Man:Man1GlcNAc2-PP-Dol alpha-1,3-mannosyltransferase activity	0	1	0	0.918177	1	1	1
molecular_function	GO:0102704	GDP-Man:Man2GlcNAc2-PP-dolichol alpha-1,6-mannosyltransferase activity	0	1	0	0.918177	1	1	1
cellular_component	GO:0072686	mitotic spindle	0	8	0	0.236309	1	1	1
molecular_function	GO:0016818	hydrolase activity, acting on acid anhydrides, in phosphorus-containing anhydrides	0	3	0	0.172371	0.905204	1	1
cellular_component	GO:0005750	mitochondrial respiratory chain complex III	0	7	0	0.510382	1	1	1
molecular_function	GO:0008121	ubiquinol-cytochrome-c reductase activity	0	3	0	0.774029	1	1	1
biological_process	GO:0006122	mitochondrial electron transport, ubiquinol to cytochrome c	0	8	0	0.476723	1	1	1
molecular_function	GO:0042393	histone binding	0	8	0	0.774376	0.609347	1	1
biological_process	GO:0070899	mitochondrial tRNA wobble uridine modification	0	1	0	0.911645	1	1	1
molecular_function	GO:0016810	hydrolase activity, acting on carbon-nitrogen (but not peptide) bonds	0	17	0	0.298666	0.84434	1	1
molecular_function	GO:0019787	ubiquitin-like protein transferase activity	0	1	0	0.995817	0.0140501	1	0.984
molecular_function	GO:0016616	oxidoreductase activity, acting on the CH-OH group of donors, NAD or NADP as acceptor	0	9	0	0.0106021	0.99867	0.403	1
molecular_function	GO:0004821	histidine-tRNA ligase activity	0	1	0	0.918177	1	1	1
biological_process	GO:0006427	histidyl-tRNA aminoacylation	0	1	0	0.911645	1	1	1
cellular_component	GO:0016035	zeta DNA polymerase complex	0	1	0	0.908448	1	1	1
molecular_function	GO:0003887	DNA-directed DNA polymerase activity	0	8	0	0.504903	1	1	1
biological_process	GO:0019985	translesion synthesis	0	2	0	0.878541	0.476972	1	1
molecular_function	GO:0004476	mannose-6-phosphate isomerase activity	0	1	0	0.918177	1	1	1
biological_process	GO:0000032	cell wall mannoprotein biosynthetic process	0	2	0	0.831074	1	1	1
biological_process	GO:0009298	GDP-mannose biosynthetic process	0	8	0	0.476723	1	1	1
molecular_function	GO:0004365	glyceraldehyde-3-phosphate dehydrogenase (NAD+) (phosphorylating) activity	0	1	0	0.918177	1	1	1
biological_process	GO:0006006	glucose metabolic process	0	3	0	0.906326	0.257166	1	1
molecular_function	GO:0019120	hydrolase activity, acting on acid halide bonds, in C-halide compounds	0	2	0	0.843034	1	1	1
cellular_component	GO:0030123	AP-3 adaptor complex	0	3	0	0.749671	1	1	1
biological_process	GO:0006896	Golgi to vacuole transport	0	4	0	0.690606	1	1	1
molecular_function	GO:0090560	2-(3-amino-3-carboxypropyl)histidine synthase activity	0	2	0	0.843034	1	1	1
biological_process	GO:0017183	peptidyl-diphthamide biosynthetic process from peptidyl-histidine	0	5	0	0.629517	1	1	1
cellular_component	GO:0031207	Sec62/Sec63 complex	0	1	0	0.908448	1	1	1
biological_process	GO:0031204	posttranslational protein targeting to membrane, translocation	0	4	0	0.690606	1	1	1
molecular_function	GO:0004609	phosphatidylserine decarboxylase activity	0	2	0	0.843034	1	1	1
biological_process	GO:0006646	phosphatidylethanolamine biosynthetic process	0	4	0	0.690606	1	1	1
biological_process	GO:0010636	positive regulation of mitochondrial fusion	0	1	0	0.911645	1	1	1
biological_process	GO:0010954	positive regulation of protein processing	0	1	0	0.911645	1	1	1
biological_process	GO:0016540	protein autoprocessing	0	3	0	0.757602	1	1	1
biological_process	GO:0009268	response to pH	0	1	0	0.757602	1	1	1
molecular_function	GO:0004659	prenyltransferase activity	0	3	0	0.618862	0.745346	1	1
biological_process	GO:0009820	alkaloid metabolic process	0	3	0	0.757602	1	1	1
biological_process	GO:0044249	cellular biosynthetic process	0	7	0	0.778011	0.261938	1	1
biological_process	GO:1901576	organic substance biosynthetic process	0	3	0	0.798755	0.23896	1	1
molecular_function	GO:0097027	ubiquitin-protein transferase activator activity	0	3	0	0.774029	1	1	1
biological_process	GO:1904668	positive regulation of ubiquitin protein ligase activity	0	3	0	0.757602	1	1	1
biological_process	GO:0006865	amino acid transport	0	19	0	0.107756	1	1	1
molecular_function	GO:0005315	inorganic phosphate transmembrane transporter activity	0	9	0	0.463528	1	1	1
biological_process	GO:0006817	phosphate ion transport	0	6	0	0.396013	1	1	1
molecular_function	GO:0070290	N-acylphosphatidylethanolamine-specific phospholipase D activity	0	4	0	0.71066	1	1	1
molecular_function	GO:0004630	phospholipase D activity	0	3	0	0.774029	1	1	1
biological_process	GO:0048017	inositol lipid-mediated signaling	0	3	0	0.523028	1	1	1
biological_process	GO:0006654	phosphatidic acid biosynthetic process	0	2	0	0.831074	1	1	1
molecular_function	GO:0042123	glucanosyltransferase activity	0	2	0	0.843034	1	1	1
biological_process	GO:0071840	cellular component organization or biogenesis	0	2	0	0.390803	0.664388	1	1
biological_process	GO:0071852	fungal-type cell wall organization or biogenesis	0	3	0	0.825799	0.382258	1	1
biological_process	GO:0097428	protein maturation by iron-sulfur cluster transfer	0	3	0	0.908025	0.426184	1	1
molecular_function	GO:0004022	alcohol dehydrogenase (NAD+) activity	0	2	0	0.843034	1	1	1
molecular_function	GO:0047988	hydroxyacid-oxoacid transhydrogenase activity	0	1	0	0.918177	1	1	1
molecular_function	GO:0004812	aminoacyl-tRNA ligase activity	0	4	0	0.0353786	1	0.858	1
cellular_component	GO:0030690	Noc1p-Noc2p complex	0	2	0	0.825259	1	1	1
cellular_component	GO:0030691	Noc2p-Noc3p complex	0	1	0	0.908448	1	1	1
biological_process	GO:0042255	ribosome assembly	0	3	0	0.717983	0.56566	1	1
molecular_function	GO:0051087	chaperone binding	0	10	0	0.425537	1	1	1
molecular_function	GO:0008496	mannan endo-1,6-alpha-mannosidase activity	0	6	0	0.599031	1	1	1
biological_process	GO:0016052	carbohydrate catabolic process	0	9	0	0.00476126	0.998704	0.294	1
molecular_function	GO:0004345	glucose-6-phosphate dehydrogenase activity	0	1	0	0.918177	1	1	1
biological_process	GO:0006098	pentose-phosphate shunt	0	4	0	0.573816	1	1	1
biological_process	GO:0000077	DNA damage checkpoint signaling	0	5	0	0.837548	0.419681	1	1
biological_process	GO:0016572	histone phosphorylation	0	1	0	0.911645	1	1	1
cellular_component	GO:0005885	Arp2/3 protein complex	0	7	0	0.510382	1	1	1
biological_process	GO:0044396	actin cortical patch organization	0	9	0	0.917436	0.287176	1	1
biological_process	GO:0034314	Arp2/3 complex-mediated actin nucleation	0	7	0	0.678898	0.700233	1	1
biological_process	GO:0030866	cortical actin cytoskeleton organization	0	2	0	0.791417	0.48125	1	1
biological_process	GO:0030833	regulation of actin filament polymerization	0	5	0	0.51875	0.811637	1	1
cellular_component	GO:0000176	nuclear exosome (RNase complex)	0	10	0	0.382439	1	1	1
molecular_function	GO:0000175	3'-5'-exoribonuclease activity	0	3	0	0.893449	0.450039	1	1
biological_process	GO:0000467	exonucleolytic trimming to generate mature 3'-end of 5.8S rRNA from tricistronic rRNA transcript (SSU-rRNA, 5.8S rRNA, LSU-rRNA)	0	7	0	0.523028	1	1	1
cellular_component	GO:0008541	proteasome regulatory particle, lid subcomplex	0	9	0	0.421066	1	1	1
molecular_function	GO:0030234	enzyme regulator activity	0	6	0	0.99927	0.00202463	1	0.349
biological_process	GO:0045842	positive regulation of mitotic metaphase/anaphase transition	0	4	0	0.629517	1	1	1
biological_process	GO:0045041	protein import into mitochondrial intermembrane space	0	5	0	0.629517	1	1	1
cellular_component	GO:0005948	acetolactate synthase complex	0	2	0	0.825259	1	1	1
cellular_component	GO:0042645	mitochondrial nucleoid	0	8	0	0.421066	1	1	1
molecular_function	GO:0003984	acetolactate synthase activity	0	3	0	0.774029	1	1	1
molecular_function	GO:1990610	acetolactate synthase regulator activity	0	1	0	0.918177	1	1	1
biological_process	GO:0009097	isoleucine biosynthetic process	0	6	0	0.573816	1	1	1
biological_process	GO:0009099	valine biosynthetic process	0	4	0	0.690606	1	1	1
molecular_function	GO:0004845	uracil phosphoribosyltransferase activity	0	1	0	0.918177	1	1	1
biological_process	GO:0006334	nucleosome assembly	0	6	0	0.780921	0.603987	1	1
biological_process	GO:0006337	nucleosome disassembly	0	2	0	0.831074	1	1	1
biological_process	GO:0032012	regulation of ARF protein signal transduction	0	4	0	0.690606	1	1	1
cellular_component	GO:0005674	transcription factor TFIIF complex	0	2	0	0.825259	1	1	1
cellular_component	GO:0030907	MBF transcription complex	0	1	0	0.908448	1	1	1
molecular_function	GO:0004602	glutathione peroxidase activity	0	2	0	0.843034	1	1	1
biological_process	GO:0061692	cellular detoxification of hydrogen peroxide	0	1	0	0.911645	1	1	1
molecular_function	GO:0004411	homogentisate 1,2-dioxygenase activity	0	2	0	0.843034	1	1	1
biological_process	GO:0006570	tyrosine metabolic process	0	2	0	0.523028	1	1	1
biological_process	GO:0007249	I-kappaB kinase/NF-kappaB signaling	0	1	0	0.911645	1	1	1
molecular_function	GO:0046961	proton-transporting ATPase activity, rotational mechanism	0	10	0	0.425537	1	1	1
biological_process	GO:0006491	N-glycan processing	0	1	0	0.911645	1	1	1
molecular_function	GO:0004057	arginyltransferase activity	0	1	0	0.918177	1	1	1
molecular_function	GO:0035925	mRNA 3'-UTR AU-rich region binding	0	1	0	0.918177	1	1	1
biological_process	GO:0070935	3'-UTR-mediated mRNA stabilization	0	1	0	0.911645	1	1	1
molecular_function	GO:0042577	lipid phosphatase activity	0	5	0	0.652468	1	1	1
biological_process	GO:0006644	phospholipid metabolic process	0	8	0	0.0208127	0.995401	0.799	1
cellular_component	GO:0005721	pericentric heterochromatin	0	8	0	0.463583	1	1	1
molecular_function	GO:0019903	protein phosphatase binding	0	1	0	0.918177	1	1	1
biological_process	GO:0043666	regulation of phosphoprotein phosphatase activity	0	3	0	0.690606	1	1	1
cellular_component	GO:0009341	beta-galactosidase complex	0	3	0	0.749671	1	1	1
molecular_function	GO:0004565	beta-galactosidase activity	0	3	0	0.774029	1	1	1
biological_process	GO:0071586	CAAX-box protein processing	0	2	0	0.831074	1	1	1
cellular_component	GO:0045239	tricarboxylic acid cycle enzyme complex	0	1	0	0.749671	1	1	1
molecular_function	GO:0004333	fumarate hydratase activity	0	1	0	0.918177	1	1	1
biological_process	GO:0017000	antibiotic biosynthetic process	0	2	0	0.831074	1	1	1
biological_process	GO:0032968	positive regulation of transcription elongation from RNA polymerase II promoter	0	10	0	0.396013	1	1	1
biological_process	GO:0006635	fatty acid beta-oxidation	0	5	0	0.629517	1	1	1
molecular_function	GO:0003725	double-stranded RNA binding	0	2	0	0.843034	1	1	1
molecular_function	GO:0061710	L-threonylcarbamoyladenylate synthase	0	1	0	0.918177	1	1	1
molecular_function	GO:0043047	single-stranded telomeric DNA binding	0	7	0	0.549961	1	1	1
biological_process	GO:0002949	tRNA threonylcarbamoyladenosine modification	0	3	0	0.757602	1	1	1
molecular_function	GO:0004516	nicotinate phosphoribosyltransferase activity	0	1	0	0.918177	1	1	1
molecular_function	GO:0004514	nicotinate-nucleotide diphosphorylase (carboxylating) activity	0	2	0	0.843034	1	1	1
biological_process	GO:0019358	nicotinate nucleotide salvage	0	1	0	0.911645	1	1	1
molecular_function	GO:0005388	P-type calcium transporter activity	0	6	0	0.599031	1	1	1
cellular_component	GO:0035974	meiotic spindle pole body	0	1	0	0.908448	1	1	1
molecular_function	GO:0043015	gamma-tubulin binding	0	5	0	0.652468	1	1	1
biological_process	GO:1990734	astral microtubule anchoring at mitotic spindle pole body	0	1	0	0.911645	1	1	1
biological_process	GO:0090307	mitotic spindle assembly	0	3	0	0.690606	1	1	1
biological_process	GO:0098863	nuclear migration by microtubule mediated pushing forces	0	1	0	0.911645	1	1	1
molecular_function	GO:0004784	superoxide dismutase activity	0	4	0	0.71066	1	1	1
cellular_component	GO:0031227	intrinsic component of endoplasmic reticulum membrane	0	1	0	0.672918	0.611529	1	1
biological_process	GO:0030026	cellular manganese ion homeostasis	0	5	0	0.629517	1	1	1
cellular_component	GO:0031901	early endosome membrane	0	2	0	0.825259	1	1	1
biological_process	GO:0006383	transcription by RNA polymerase III	0	4	0	0.118276	1	1	1
molecular_function	GO:0004631	phosphomevalonate kinase activity	0	2	0	0.843034	1	1	1
biological_process	GO:0006695	cholesterol biosynthetic process	0	1	0	0.911645	1	1	1
biological_process	GO:0019287	isopentenyl diphosphate biosynthetic process, mevalonate pathway	0	4	0	0.629517	1	1	1
molecular_function	GO:0031151	histone methyltransferase activity (H3-K79 specific)	0	1	0	0.918177	1	1	1
molecular_function	GO:0031493	obsolete nucleosomal histone binding	0	1	0	0.918177	1	1	1
molecular_function	GO:0008324	cation transmembrane transporter activity	0	15	0	0.0427362	0.983151	0.904	1
biological_process	GO:0046916	cellular transition metal ion homeostasis	0	9	0	0.196894	0.953465	1	1
biological_process	GO:0051131	chaperone-mediated protein complex assembly	0	4	0	0.690606	1	1	1
biological_process	GO:0042026	protein refolding	0	7	0	0.523028	1	1	1
molecular_function	GO:2001070	starch binding	0	3	0	0.774029	1	1	1
molecular_function	GO:0004410	homocitrate synthase activity	0	1	0	0.918177	1	1	1
cellular_component	GO:0005736	RNA polymerase I complex	0	7	0	0.510382	1	1	1
molecular_function	GO:0001054	RNA polymerase I activity	0	7	0	0.549961	1	1	1
molecular_function	GO:0001055	RNA polymerase II activity	0	7	0	0.549961	1	1	1
molecular_function	GO:0003968	RNA-directed 5'-3' RNA polymerase activity	0	10	0	0.425537	1	1	1
biological_process	GO:0042790	nucleolar large rRNA transcription by RNA polymerase I	0	11	0	0.360922	1	1	1
biological_process	GO:0006363	termination of RNA polymerase I transcription	0	7	0	0.523028	1	1	1
biological_process	GO:0006362	transcription elongation from RNA polymerase I promoter	0	8	0	0.476723	1	1	1
biological_process	GO:0006361	transcription initiation from RNA polymerase I promoter	0	7	0	0.476723	1	1	1
molecular_function	GO:0008079	translation termination factor activity	0	1	0	0.919653	0.400969	1	1
biological_process	GO:0006449	regulation of translational termination	0	2	0	0.757602	1	1	1
biological_process	GO:0042274	ribosomal small subunit biogenesis	0	6	0	0.268597	0.897261	1	1
molecular_function	GO:0008137	NADH dehydrogenase (ubiquinone) activity	0	6	0	0.599031	1	1	1
molecular_function	GO:0008408	3'-5' exonuclease activity	0	4	0	0.68025	0.69779	1	1
cellular_component	GO:0000276	mitochondrial proton-transporting ATP synthase complex, coupling factor F(o)	0	4	0	0.510382	1	1	1
molecular_function	GO:0106306	protein serine/threonine phosphatase activity	0	12	0	NA	NA	NA	NA
molecular_function	GO:0106307	protein serine/threonine phosphatase activity	0	12	0	NA	NA	NA	NA
biological_process	GO:0006113	fermentation	0	1	0	0.690606	1	1	1
cellular_component	GO:1902554	serine/threonine protein kinase complex	0	1	0	0.997073	0.0153743	1	0.916
cellular_component	GO:0034973	Sid2-Mob1 complex	0	2	0	0.825259	1	1	1
molecular_function	GO:0030295	protein kinase activator activity	0	3	0	0.652468	1	1	1
biological_process	GO:0034613	cellular protein localization	0	4	0	0.934815	0.101304	1	1
biological_process	GO:0000281	mitotic cytokinesis	0	2	0	0.742834	0.538646	1	1
biological_process	GO:1903473	positive regulation of mitotic actomyosin contractile ring contraction	0	3	0	0.757602	1	1	1
biological_process	GO:0031031	positive regulation of septation initiation signaling	0	2	0	0.831074	1	1	1
biological_process	GO:0006468	protein phosphorylation	0	1	0	0.992607	0.0272891	1	1
molecular_function	GO:0016798	hydrolase activity, acting on glycosyl bonds	0	3	0	0.00357738	0.998745	0.132	1
cellular_component	GO:0008540	proteasome regulatory particle, base subcomplex	0	9	0	0.421066	1	1	1
cellular_component	GO:0034515	proteasome storage granule	0	17	0	0.194885	1	1	1
molecular_function	GO:0004175	endopeptidase activity	0	1	0	0.21481	0.87703	1	1
biological_process	GO:0043248	proteasome assembly	0	10	0	0.43434	0.857513	1	1
biological_process	GO:0042176	regulation of protein catabolic process	0	3	0	0.878541	0.476972	1	1
molecular_function	GO:0008442	3-hydroxyisobutyrate dehydrogenase activity	0	1	0	0.918177	1	1	1
biological_process	GO:0006574	valine catabolic process	0	1	0	0.911645	1	1	1
cellular_component	GO:0032299	ribonuclease H2 complex	0	2	0	0.825259	1	1	1
molecular_function	GO:0004568	chitinase activity	0	17	0	0.233755	1	1	1
biological_process	GO:0006032	chitin catabolic process	0	12	0	0.328931	1	1	1
cellular_component	GO:0031304	intrinsic component of mitochondrial inner membrane	0	1	0	0.803722	0.578934	1	1
cellular_component	GO:0030061	mitochondrial crista	0	1	0	0.908448	1	1	1
cellular_component	GO:0097002	mitochondrial inner boundary membrane	0	2	0	0.825259	1	1	1
molecular_function	GO:1901612	cardiolipin binding	0	1	0	0.918177	1	1	1
molecular_function	GO:0001786	phosphatidylserine binding	0	2	0	0.843034	1	1	1
biological_process	GO:0015886	heme transport	0	3	0	0.757602	1	1	1
biological_process	GO:0008053	mitochondrial fusion	0	1	0	0.831074	1	1	1
biological_process	GO:1990627	mitochondrial inner membrane fusion	0	1	0	0.911645	1	1	1
biological_process	GO:1990626	mitochondrial outer membrane fusion	0	1	0	0.911645	1	1	1
biological_process	GO:0000001	mitochondrion inheritance	0	6	0	0.573816	1	1	1
[truncated: 2,204 more rows]
[truncated: 108 more columns]

## Sheet: polyQ⁄N
GO domain	GO ID	GO term	polyQ⁄N protein	total number	number / total	raw p-value under-representation	raw p-value over-representation	FWER under-representation	FWER over-representation	Gene Name
[truncated: 3,814 more rows]
[truncated: 287 more columns]

[truncated: 19 more sheets: polyN, polyY, polyW, polyC, polyP, polyA, polyS, polyT, polyD, polyE, polyG, polyF, polyH, polyI, polyL, polyV, polyM, polyR, polyK]
