# Supplementary material for: Noncanonical usage of stop codons in ciliates expands proteins with Q-rich motifs
Source: bioRxiv preprint, doi:10.1101/2020.12.08.407247, version 3 (2023-11-13)
Supplement: Dataset DS15 [file 407247_file29.xlsx]

## Sheet: SCD
GO domain	GO ID	GO term	SCD protein	total number	number / total	raw p-value under-representation	raw p-value over-representation	FWER under-representation	FWER over-representation	Gene Name
cellular_component	GO:0005634	nucleus	240	702	0.34188	1	1.10941e-11	1	0	RAD5_USTMA	SWC5_USTMA	PPIL2_USTMA	URB1_USTMA	SSN3_USTMA	STE20_USTMA	TRM5_USTMA	BRE1_USTMA	CHK1_USTMA	CLP1_USTMA	DBP4_USTMA	EAF11_USTMA	MSH3_USTMA	PRP5_USTMA	PPIL4_USTMA	RRP3_USTMA	STUA_USTMA	STU1_USTMA	PACC_USTMA	A0A0D1CXS6_USTMA	A0A0D1DQ67_USTMA	A0A0D1CX99_USTMA	A0A0D1CDH0_USTMA	A0A0D1DZT6_USTMA	A0A0D1D013_USTMA	A0A0D1CNF6_USTMA	A0A0D1CBA5_USTMA	A0A0D1DTJ9_USTMA	A0A0D1E529_USTMA	A0A0D1DV67_USTMA	A0A0D1DPJ8_USTMA	A0A0D1CQ20_USTMA	A0A0D1E418_USTMA	A0A0D1CRI1_USTMA	A0A0D1DS11_USTMA	A0A0D1CTU4_USTMA	A0A0D1C572_USTMA	A0A0D1CAB0_USTMA	A0A0D1CUN7_USTMA	A0A0D1DQC1_USTMA
cellular_component	GO:0016021	integral component of membrane	217	1088	0.199449	9.25193e-05	0.999934	0.004	1	SEY1_USTMA	UTP10_USTMA	CHS8_USTMA	CHS5_USTMA	CHS1_USTMA	CHS6_USTMA	CHS3_USTMA	PIT1_USTMA	TIM50_USTMA	A0A0D1E0K7_USTMA	A0A0D1DRC6_USTMA	A0A0D1DWM5_USTMA	A0A0D1CLA5_USTMA	A0A0D1C917_USTMA	A0A0D1E6Q4_USTMA	A0A0D1E1W5_USTMA	A0A0D1E2A3_USTMA	A0A0D1DUE7_USTMA	A0A0D1CHW7_USTMA	A0A0D1BWM3_USTMA	A0A0D1C461_USTMA	A0A0D1DYS1_USTMA	A0A0D1CHC4_USTMA	A0A0D1E8H2_USTMA	A0A0D1E2C4_USTMA	A0A0D1DX22_USTMA	A0A0D1E7T5_USTMA	A0A0D1E4C4_USTMA	A0A0D1DWI0_USTMA	A0A0D1E6N2_USTMA	A0A0D1DU98_USTMA	A0A0D1CBL8_USTMA	A0A0D1E0Y3_USTMA	A0A0D1C8P2_USTMA	A0A0D1EAS5_USTMA	A0A0D1E0T5_USTMA	A0A0D1CT75_USTMA	A0A0D1CWK3_USTMA	A0A0D1C312_USTMA	A0A0D1CGN9_USTMA
cellular_component	GO:0005737	cytoplasm	186	678	0.274336	0.00273946	0.997825	0.151	1	RAD5_USTMA	SID2_USTMA	STE20_USTMA	TRM5_USTMA	TBB_USTMA	CWC21_USTMA	CHK1_USTMA	CYAA_USTMA	MYO1_USTMA	NMT_USTMA	NST1_USTMA	PACC_USTMA	A0A0D1CXS6_USTMA	A0A0D1BV57_USTMA	A0A0D1DZT6_USTMA	A0A0D1E1E4_USTMA	A0A0D1DT43_USTMA	A0A0D1C868_USTMA	A0A0D1E1D6_USTMA	A0A0D1CG70_USTMA	A0A0D1CRI1_USTMA	A0A0D1CTU4_USTMA	A0A0D1DYT4_USTMA	A0A0D1DYS4_USTMA	A0A0D1CW17_USTMA	A0A0D1DX71_USTMA	A0A0D1BXP5_USTMA	A0A0D1CSW3_USTMA	A0A0D1C217_USTMA	A0A0D1DYU5_USTMA	A0A0D1E7S0_USTMA	A0A0D1CWM4_USTMA	A0A0D1E816_USTMA	A0A0D1DPZ6_USTMA	A0A0D1EBV9_USTMA	A0A0D1C4S0_USTMA	A0A0D1E6C3_USTMA	A0A0D1CUN2_USTMA	A0A0D1E042_USTMA	A0A0D1CS07_USTMA
molecular_function	GO:0005524	ATP binding	156	501	0.311377	0.999991	1.48068e-05	1	0.002	RAD5_USTMA	SSN3_USTMA	STE20_USTMA	CHS8_USTMA	CHK1_USTMA	CLP1_USTMA	DBP4_USTMA	GUAA_USTMA	CYAA_USTMA	MYO1_USTMA	GATA_USTMA	MSH3_USTMA	PRP5_USTMA	RRP3_USTMA	A0A0D1C902_USTMA	A0A0D1CX99_USTMA	A0A0D1DXU9_USTMA	A0A0D1DT43_USTMA	A0A0D1C917_USTMA	A0A0D1DPJ8_USTMA	A0A0D1BY56_USTMA	A0A0D1E418_USTMA	A0A0D1C572_USTMA	A0A0D1DRI5_USTMA	A0A0D1DX75_USTMA	A0A0D1E2C4_USTMA	A0A0D1DYS4_USTMA	A0A0D1BXP5_USTMA	A0A0D1DZD7_USTMA	A0A0D1C1L3_USTMA	A0A0D1E6N2_USTMA	A0A0D1C217_USTMA	A0A0D1CX31_USTMA	A0A0D1CBL8_USTMA	A0A0D1C4U8_USTMA	A0A0D1E0Y3_USTMA	A0A0D1CNX0_USTMA	A0A0D1CF39_USTMA	A0A0D1DUI7_USTMA	A0A0D1CLZ9_USTMA
molecular_function	GO:0008270	zinc ion binding	76	234	0.324786	0.999497	0.000843884	1	0.17	RAD5_USTMA	URB1_USTMA	SEC23_USTMA	A0A0D1DPI2_USTMA	A0A0D1C8D7_USTMA	A0A0D1DYX7_USTMA	A0A0D1CF85_USTMA	A0A0D1E529_USTMA	A0A0D1DSA8_USTMA	A0A0D1C349_USTMA	A0A0D1CL60_USTMA	A0A0D1EAB3_USTMA	A0A0D1E8V2_USTMA	A0A0D1CWU6_USTMA	A0A0D1E461_USTMA	A0A0D1DMY2_USTMA	A0A0D1BXV7_USTMA	A0A0D1E6C3_USTMA	A0A0D1C3G4_USTMA	A0A0D1CCY4_USTMA	A0A0D1E537_USTMA	A0A0D1C178_USTMA	A0A0D1E6F1_USTMA	A0A0D1C1L8_USTMA	A0A0D1DSH3_USTMA	A0A0D1CNA7_USTMA	A0A0D1C0E5_USTMA	A0A0D1E9F3_USTMA	A0A0D1EB86_USTMA	A0A0D1DQ32_USTMA	A0A0D1CN88_USTMA	A0A0D1CN71_USTMA	A0A0D1E4X9_USTMA	A0A0D1EB74_USTMA	A0A0D1DTF5_USTMA	A0A0D1CML3_USTMA	A0A0D1EBS5_USTMA	A0A0D1CFS0_USTMA	A0A0D1CFV9_USTMA	A0A0D1E348_USTMA
molecular_function	GO:0000981	DNA-binding transcription factor activity, RNA polymerase II-specific	72	149	0.483221	1	1.82881e-12	1	0	URB1_USTMA	A0A0D1C8D7_USTMA	A0A0D1DYX7_USTMA	A0A0D1CF85_USTMA	A0A0D1CDH0_USTMA	A0A0D1D013_USTMA	A0A0D1E529_USTMA	A0A0D1DSA8_USTMA	A0A0D1E8A1_USTMA	A0A0D1CAB0_USTMA	A0A0D1CWU6_USTMA	A0A0D1E461_USTMA	A0A0D1BXV7_USTMA	A0A0D1C3G4_USTMA	A0A0D1DYA8_USTMA	A0A0D1E537_USTMA	A0A0D1C178_USTMA	A0A0D1DQ81_USTMA	A0A0D1E6F1_USTMA	A0A0D1C1L8_USTMA	A0A0D1CNA7_USTMA	A0A0D1C0E5_USTMA	A0A0D1E9F3_USTMA	A0A0D1CS44_USTMA	A0A0D1DSZ0_USTMA	A0A0D1CSL8_USTMA	A0A0D1EB86_USTMA	A0A0D1CN88_USTMA	A0A0D1E4X9_USTMA	A0A0D1EB74_USTMA	A0A0D1DTF5_USTMA	A0A0D1CA32_USTMA	A0A0D1E348_USTMA	A0A0D1E6Z4_USTMA	A0A0D1E6E9_USTMA	A0A0D1CFV5_USTMA	A0A0D1DWA4_USTMA	A0A0D1CXP1_USTMA	A0A0D1BUZ6_USTMA	A0A0D1DZQ5_USTMA
cellular_component	GO:0005829	cytosol	72	331	0.217523	0.0307831	0.97695	0.914	1	GUAA_USTMA	A0A0D1C902_USTMA	A0A0D1DRV9_USTMA	A0A0D1CNF6_USTMA	A0A0D1DT43_USTMA	A0A0D1CUV6_USTMA	A0A0D1CQ20_USTMA	A0A0D1DWI0_USTMA	A0A0D1EB49_USTMA	A0A0D1E0S3_USTMA	A0A0D1E765_USTMA	A0A0D1CZ19_USTMA	A0A0D1DMY2_USTMA	A0A0D1E474_USTMA	A0A0D1DU73_USTMA	A0A0D1C4S0_USTMA	A0A0D1CDP4_USTMA	A0A0D1DZ93_USTMA	A0A0D1DPA2_USTMA	A0A0D1CZS8_USTMA	A0A0D1E1G0_USTMA	A0A0D1DNV8_USTMA	A0A0D1DWT5_USTMA	A0A0D1DZ67_USTMA	A0A0D1CA24_USTMA	A0A0D1E9T3_USTMA	A0A0D1E6M2_USTMA	A0A0D1DZ97_USTMA	A0A0D1CGW4_USTMA	A0A0D1C7P5_USTMA	A0A0D1CS00_USTMA	A0A0D1CH35_USTMA	A0A0D1E1J4_USTMA	A0A0D1DYZ9_USTMA	A0A0D1DXU8_USTMA	A0A0D1DP71_USTMA	A0A0D1DST4_USTMA	A0A0D1DV89_USTMA	A0A0D1DY58_USTMA	A0A0D1E0C2_USTMA
molecular_function	GO:0046872	metal ion binding	64	312	0.205128	0.808814	0.218805	1	1	SSN3_USTMA	VPS27_USTMA	BRE1_USTMA	CWC2_USTMA	NAR1_USTMA	CYAA_USTMA	LEUC_USTMA	PACC_USTMA	A0A0D1BV57_USTMA	A0A0D1E5A6_USTMA	A0A0D1E8B7_USTMA	A0A0D1DQ00_USTMA	A0A0D1C3I0_USTMA	A0A0D1CUN7_USTMA	A0A0D1EDM6_USTMA	A0A0D1CNX0_USTMA	A0A0D1DU59_USTMA	A0A0D1E264_USTMA	A0A0D1EA36_USTMA	A0A0D1E042_USTMA	A0A0D1DVS1_USTMA	A0A0D1DPA2_USTMA	A0A0D1BUE2_USTMA	A0A0D1E6L6_USTMA	A0A0D1E0X0_USTMA	A0A0D1CJ18_USTMA	A0A0D1EAT9_USTMA	A0A0D1CJ01_USTMA	A0A0D1CR28_USTMA	A0A0D1CM04_USTMA	A0A0D1DZW1_USTMA	A0A0D1E2K8_USTMA	A0A0D1E9J4_USTMA	A0A0D1E146_USTMA	A0A0D1DT60_USTMA	A0A0D1CPX3_USTMA	A0A0D1EDU6_USTMA	A0A0D1DST4_USTMA	A0A0D1CPS3_USTMA	A0A0D1BUW4_USTMA
cellular_component	GO:0005886	plasma membrane	48	171	0.280702	0.705492	0.351012	1	1	SLA1_USTMA	CHS8_USTMA	CHS5_USTMA	CHS1_USTMA	CHS6_USTMA	CYAA_USTMA	MYO1_USTMA	CHS3_USTMA	PIT1_USTMA	A0A0D1E0K7_USTMA	A0A0D1E956_USTMA	A0A0D1C917_USTMA	A0A0D1E8H2_USTMA	A0A0D1E7T5_USTMA	A0A0D1CKC9_USTMA	A0A0D1E8D6_USTMA	A0A0D1CJ43_USTMA	A0A0D1CGN9_USTMA	A0A0D1DU73_USTMA	A0A0D1CGI6_USTMA	A0A0D1DY37_USTMA	A0A0D1DYV8_USTMA	A0A0D1DV72_USTMA	A0A0D1DSP1_USTMA	A0A0D1CA24_USTMA	A0A0D1CCS8_USTMA	A0A0D1DU23_USTMA	A0A0D1EBL3_USTMA	A0A0D1E5C3_USTMA	A0A0D1DZL1_USTMA	A0A0D1CUC0_USTMA	A0A0D1E0C2_USTMA	A0A0D1BVS5_USTMA	A0A0D1CQG6_USTMA	A0A0D1E277_USTMA	A0A0D1DVU1_USTMA	A0A0D1DT27_USTMA	A0A0D1CVI3_USTMA	A0A0D1D1B0_USTMA	A0A0D1E789_USTMA
molecular_function	GO:0003677	DNA binding	47	145	0.324138	1	1.58599e-07	1	0	RAD5_USTMA	TOF1_USTMA	PACC_USTMA	A0A0D1C8D7_USTMA	A0A0D1DYX7_USTMA	A0A0D1CF85_USTMA	A0A0D1E6I9_USTMA	A0A0D1C3I0_USTMA	A0A0D1C572_USTMA	A0A0D1ECE5_USTMA	A0A0D1DZD7_USTMA	A0A0D1C1L3_USTMA	A0A0D1C4U8_USTMA	A0A0D1CYL9_USTMA	A0A0D1E461_USTMA	A0A0D1C496_USTMA	A0A0D1CPN1_USTMA	A0A0D1EB25_USTMA	A0A0D1C0E5_USTMA	A0A0D1DMS6_USTMA	A0A0D1CM04_USTMA	A0A0D1DYS5_USTMA	A0A0D1EB74_USTMA	A0A0D1DTF5_USTMA	A0A0D1EBS5_USTMA	A0A0D1CY49_USTMA	A0A0D1E7Z9_USTMA	A0A0D1CJU8_USTMA	A0A0D1DZK1_USTMA	A0A0D1CPS3_USTMA	A0A0D1E1Y0_USTMA	A0A0D1E492_USTMA	A0A0D1DTM4_USTMA	A0A0D1E232_USTMA	A0A0D1CF38_USTMA	A0A0D1E179_USTMA	A0A0D1C325_USTMA	A0A0D1CHF9_USTMA	A0A0D1CGN3_USTMA	A0A0D1E7Y5_USTMA
molecular_function	GO:0003723	RNA binding	43	220	0.195455	0.00741027	0.994815	0.549	1	PPIL4_USTMA	RRP3_USTMA	A0A0D1CXS6_USTMA	A0A0D1DYE3_USTMA	A0A0D1CBA5_USTMA	A0A0D1DQ00_USTMA	A0A0D1CE85_USTMA	A0A0D1E554_USTMA	A0A0D1CDX8_USTMA	A0A0D1E4H5_USTMA	A0A0D1DW69_USTMA	A0A0D1DV38_USTMA	A0A0D1C1G0_USTMA	A0A0D1CMN6_USTMA	A0A0D1E1T0_USTMA	A0A0D1CZS8_USTMA	A0A0D1E9H8_USTMA	A0A0D1DQJ5_USTMA	A0A0D1DZJ5_USTMA	A0A0D1CSU6_USTMA	A0A0D1DZ34_USTMA	A0A0D1CDE0_USTMA	A0A0D1E9T3_USTMA	A0A0D1C533_USTMA	A0A0D1EBS5_USTMA	A0A0D1DZB4_USTMA	A0A0D1DW43_USTMA	A0A0D1E9W9_USTMA	A0A0D1CXH6_USTMA	A0A0D1E8G7_USTMA	A0A0D1BUW4_USTMA	A0A0D1CV54_USTMA	A0A0D1DTM4_USTMA	A0A0D1DZ58_USTMA	A0A0D1CGN6_USTMA	A0A0D1CPZ3_USTMA	A0A0D1DWU5_USTMA	A0A0D1E1J8_USTMA	A0A0D1DSV9_USTMA	A0A0D1E733_USTMA
cellular_component	GO:0005739	mitochondrion	40	273	0.14652	1.25528e-08	1	0	1	FER4_USTMA	IEND1_USTMA	KMO_USTMA	GATA_USTMA	MSH3_USTMA	A0A0D1CE85_USTMA	A0A0D1E1R3_USTMA	A0A0D1CKH5_USTMA	A0A0D1C631_USTMA	A0A0D1DZD7_USTMA	A0A0D1CBB6_USTMA	A0A0D1E264_USTMA	A0A0D1CYE8_USTMA	A0A0D1DWY9_USTMA	A0A0D1DPA2_USTMA	A0A0D1E2Z5_USTMA	A0A0D1DXM4_USTMA	A0A0D1DTF0_USTMA	A0A0D1CBQ6_USTMA	A0A0D1E328_USTMA	A0A0D1CJ01_USTMA	A0A0D1E130_USTMA	A0A0D1C3X4_USTMA	A0A0D1DTH0_USTMA	A0A0D1DQE3_USTMA	A0A0D1E8D8_USTMA	A0A0D1BWP5_USTMA	A0A0D1DZW1_USTMA	A0A0D1CAM7_USTMA	A0A0D1E5F4_USTMA	A0A0D1BVA3_USTMA	A0A0D1E945_USTMA	A0A0D1CV38_USTMA	A0A0D1E720_USTMA	A0A0D1E0P3_USTMA	A0A0D1DME6_USTMA	A0A0D1CDX3_USTMA	A0A0D1CUP4_USTMA	A0A0D1DMP6_USTMA	A0A0D1E5N7_USTMA
biological_process	GO:0006357	regulation of transcription by RNA polymerase II	38	100	0.38	0.998439	0.00261983	1	0.663	URB1_USTMA	MED6_USTMA	SRB8_USTMA	A0A0D1CDH0_USTMA	A0A0D1D013_USTMA	A0A0D1CAB0_USTMA	A0A0D1E5B1_USTMA	A0A0D1DT32_USTMA	A0A0D1E5Q5_USTMA	A0A0D1DYA8_USTMA	A0A0D1DQY1_USTMA	A0A0D1DSH3_USTMA	A0A0D1CS44_USTMA	A0A0D1DSZ0_USTMA	A0A0D1D1U5_USTMA	A0A0D1CA32_USTMA	A0A0D1E8N3_USTMA	A0A0D1DXZ0_USTMA	A0A0D1BUZ6_USTMA	A0A0D1DZQ5_USTMA	A0A0D1DMZ1_USTMA	A0A0D1CUV9_USTMA	A0A0D1DMV4_USTMA	A0A0D1E465_USTMA	A0A0D1BW50_USTMA	A0A0D1CMK5_USTMA	A0A0D1C8H7_USTMA	A0A0D1EBV4_USTMA	A0A0D1DW67_USTMA	A0A0D1E2U9_USTMA	A0A0D1E1V5_USTMA	A0A0D1DQR1_USTMA	A0A0D1DX31_USTMA	A0A0D1E922_USTMA	A0A0D1CUI2_USTMA	A0A0D1E351_USTMA	A0A0D1DVL4_USTMA	A0A0D1E5N8_USTMA
cellular_component	GO:0016020	membrane	33	160	0.20625	0.000204927	0.999847	0.011	1	A0A0D1C6D2_USTMA	A0A0D1DUE7_USTMA	A0A0D1E8H2_USTMA	A0A0D1BWQ9_USTMA	A0A0D1E7T5_USTMA	A0A0D1CBL8_USTMA	A0A0D1E075_USTMA	A0A0D1C7B0_USTMA	A0A0D1DSM4_USTMA	A0A0D1E9M7_USTMA	A0A0D1CDP4_USTMA	A0A0D1E3F9_USTMA	A0A0D1E7D8_USTMA	A0A0D1CDK1_USTMA	A0A0D1E0F2_USTMA	A0A0D1CZL9_USTMA	A0A0D1E5T8_USTMA	A0A0D1DZY4_USTMA	A0A0D1E0N7_USTMA	A0A0D1DX37_USTMA	A0A0D1DRH1_USTMA	A0A0D1CBN9_USTMA	A0A0D1C5I7_USTMA	A0A0D1CRQ3_USTMA	A0A0D1DYF8_USTMA	A0A0D1DXA0_USTMA	A0A0D1DN85_USTMA	A0A0D1DPL8_USTMA	A0A0D1CJE8_USTMA	A0A0D1CKE9_USTMA	A0A0D1C4U4_USTMA	A0A0D1DZS2_USTMA	A0A0D1BVU2_USTMA
biological_process	GO:0015031	protein transport	30	84	0.357143	0.888012	0.139569	1	1	ATG2_USTMA	BRO1_USTMA	SNX3_USTMA	A0A0D1DWM5_USTMA	A0A0D1DYB3_USTMA	A0A0D1CZ47_USTMA	A0A0D1CBV0_USTMA	A0A0D1EDM6_USTMA	A0A0D1E075_USTMA	A0A0D1BUR0_USTMA	A0A0D1E967_USTMA	A0A0D1DQ05_USTMA	A0A0D1ED22_USTMA	A0A0D1CRH0_USTMA	A0A0D1DU97_USTMA	A0A0D1E7D8_USTMA	A0A0D1E892_USTMA	A0A0D1CAQ9_USTMA	A0A0D1DYZ9_USTMA	A0A0D1E2D4_USTMA	A0A0D1E2K5_USTMA	A0A0D1E6S7_USTMA	A0A0D1DV89_USTMA	A0A0D1CLQ0_USTMA	A0A0D1CDF3_USTMA	A0A0D1BZU8_USTMA	A0A0D1EAJ2_USTMA	A0A0D1E7Y2_USTMA	A0A0D1C766_USTMA	A0A0D1C4U4_USTMA
molecular_function	GO:0004674	protein serine/threonine kinase activity	30	65	0.461538	0.999868	0.000314734	1	0.059	STE20_USTMA	A0A0D1DPJ8_USTMA	A0A0D1DYS4_USTMA	A0A0D1BXP5_USTMA	A0A0D1C217_USTMA	A0A0D1CQ38_USTMA	A0A0D1DPG6_USTMA	A0A0D1CXP7_USTMA	A0A0D1E0I0_USTMA	A0A0D1CA81_USTMA	A0A0D1CRA9_USTMA	A0A0D1CH37_USTMA	A0A0D1BUB7_USTMA	A0A0D1BZL7_USTMA	A0A0D1DSL6_USTMA	A0A0D1CL71_USTMA	A0A0D1DRE2_USTMA	A0A0D1DU66_USTMA	A0A0D1DX92_USTMA	A0A0D1E676_USTMA	A0A0D1DST4_USTMA	A0A0D1BVS5_USTMA	A0A0D1CAA1_USTMA	A0A0D1CAE8_USTMA	A0A0D1BZG9_USTMA	A0A0D1DU39_USTMA	A0A0D1E136_USTMA	A0A0D1DX97_USTMA	A0A0D1E724_USTMA	A0A0D1DS71_USTMA
molecular_function	GO:0000978	RNA polymerase II cis-regulatory region sequence-specific DNA binding	29	61	0.47541	0.999991	2.86979e-05	1	0.006	URB1_USTMA	A0A0D1CDH0_USTMA	A0A0D1D013_USTMA	A0A0D1E8A1_USTMA	A0A0D1CAB0_USTMA	A0A0D1DYA8_USTMA	A0A0D1DQ81_USTMA	A0A0D1DQY1_USTMA	A0A0D1CNA7_USTMA	A0A0D1CS44_USTMA	A0A0D1DSZ0_USTMA	A0A0D1CA32_USTMA	A0A0D1E6Z4_USTMA	A0A0D1E6E9_USTMA	A0A0D1BUZ6_USTMA	A0A0D1DZQ5_USTMA	A0A0D1CUV9_USTMA	A0A0D1DMV4_USTMA	A0A0D1E465_USTMA	A0A0D1C8H7_USTMA	A0A0D1EBV4_USTMA	A0A0D1DW67_USTMA	A0A0D1E1V5_USTMA	A0A0D1DX31_USTMA	A0A0D1E922_USTMA	A0A0D1E351_USTMA	A0A0D1DVL4_USTMA	A0A0D1E4F3_USTMA	A0A0D1E5N8_USTMA
cellular_component	GO:0005730	nucleolus	26	119	0.218487	0.512523	0.564183	1	1	BFR2_USTMA	DBP4_USTMA	NOP16_USTMA	A0A0D1BY56_USTMA	A0A0D1E2E2_USTMA	A0A0D1CH67_USTMA	A0A0D1C8Q3_USTMA	A0A0D1BUR0_USTMA	A0A0D1DXE3_USTMA	A0A0D1E9H8_USTMA	A0A0D1EDG3_USTMA	A0A0D1E1Q9_USTMA	A0A0D1C4F4_USTMA	A0A0D1BZV5_USTMA	A0A0D1DQJ5_USTMA	A0A0D1E8R8_USTMA	A0A0D1EA53_USTMA	A0A0D1E8Q2_USTMA	A0A0D1DS67_USTMA	A0A0D1E248_USTMA	A0A0D1CCP2_USTMA	A0A0D1DS61_USTMA	A0A0D1C3L5_USTMA	A0A0D1C528_USTMA	A0A0D1CU96_USTMA	A0A0D1C4N8_USTMA
biological_process	GO:0035556	intracellular signal transduction	25	46	0.543478	0.999933	0.000130817	1	0.059	STE20_USTMA	CYAA_USTMA	A0A0D1DTJ9_USTMA	A0A0D1DYS4_USTMA	A0A0D1BXP5_USTMA	A0A0D1C217_USTMA	A0A0D1DXY4_USTMA	A0A0D1CST6_USTMA	A0A0D1E0I0_USTMA	A0A0D1CH37_USTMA	A0A0D1BUB7_USTMA	A0A0D1BZL7_USTMA	A0A0D1DSL6_USTMA	A0A0D1DRE2_USTMA	A0A0D1DTH1_USTMA	A0A0D1DX92_USTMA	A0A0D1E676_USTMA	A0A0D1BVS5_USTMA	A0A0D1CAA1_USTMA	A0A0D1CAE8_USTMA	A0A0D1BZG9_USTMA	A0A0D1DU39_USTMA	A0A0D1CNN3_USTMA	A0A0D1DX97_USTMA	A0A0D1DS71_USTMA
cellular_component	GO:0005789	endoplasmic reticulum membrane	24	112	0.214286	0.132162	0.901993	1	1	SEY1_USTMA	SEC13_USTMA	SEC23_USTMA	ATG2_USTMA	MDM12_USTMA	A0A0D1DU98_USTMA	A0A0D1EDM6_USTMA	A0A0D1DZT1_USTMA	A0A0D1CGF9_USTMA	A0A0D1E967_USTMA	A0A0D1E6X0_USTMA	A0A0D1CA24_USTMA	A0A0D1DV12_USTMA	A0A0D1C5V4_USTMA	A0A0D1E102_USTMA	A0A0D1DSV0_USTMA	A0A0D1CTA0_USTMA	A0A0D1E3E8_USTMA	A0A0D1DR17_USTMA	A0A0D1CVI3_USTMA	A0A0D1CFY9_USTMA	A0A0D1C766_USTMA	A0A0D1CXV0_USTMA	A0A0D1BVT0_USTMA
molecular_function	GO:0016787	hydrolase activity	24	77	0.311688	0.616438	0.418999	1	1	SIDA_USTMA	FAS2_USTMA	GATA_USTMA	A0A0D1DRI5_USTMA	A0A0D1DYF7_USTMA	A0A0D1E2R3_USTMA	A0A0D1C1G0_USTMA	A0A0D1E9H8_USTMA	A0A0D1CI25_USTMA	A0A0D1E8R8_USTMA	A0A0D1CGW4_USTMA	A0A0D1EBS5_USTMA	A0A0D1DZB4_USTMA	A0A0D1E9W9_USTMA	A0A0D1E3V9_USTMA	A0A0D1E8B5_USTMA	A0A0D1BW24_USTMA	A0A0D1DXL1_USTMA	A0A0D1CV54_USTMA	A0A0D1CGN6_USTMA	A0A0D1CMJ5_USTMA	A0A0D1DSV9_USTMA	A0A0D1D0I7_USTMA	A0A0D1CQL4_USTMA
biological_process	GO:0006355	regulation of transcription, DNA-templated	24	61	0.393443	0.998971	0.00161288	1	0.534	A0A0D1E529_USTMA	A0A0D1DS11_USTMA	A0A0D1E8A1_USTMA	A0A0D1ECE5_USTMA	A0A0D1CCY4_USTMA	A0A0D1DP85_USTMA	A0A0D1E6F1_USTMA	A0A0D1C1L8_USTMA	A0A0D1DQ32_USTMA	A0A0D1EA01_USTMA	A0A0D1CPY9_USTMA	A0A0D1C735_USTMA	A0A0D1C0V7_USTMA	A0A0D1E6E9_USTMA	A0A0D1DWA4_USTMA	A0A0D1CRW9_USTMA	A0A0D1BUZ6_USTMA	A0A0D1E232_USTMA	A0A0D1DS72_USTMA	A0A0D1E0F6_USTMA	A0A0D1E3N5_USTMA	A0A0D1E0N8_USTMA	A0A0D1DMF3_USTMA	A0A0D1DUR9_USTMA
molecular_function	GO:0005085	guanyl-nucleotide exchange factor activity	24	41	0.585366	1	1.33806e-06	1	0	A0A0D1DTJ9_USTMA	A0A0D1CTU4_USTMA	A0A0D1E8B2_USTMA	A0A0D1DUS2_USTMA	A0A0D1DZ60_USTMA	A0A0D1DU73_USTMA	A0A0D1E8J8_USTMA	A0A0D1DWU6_USTMA	A0A0D1DXY4_USTMA	A0A0D1E1I1_USTMA	A0A0D1E892_USTMA	A0A0D1D186_USTMA	A0A0D1ECM1_USTMA	A0A0D1E146_USTMA	A0A0D1BZR8_USTMA	A0A0D1BWQ2_USTMA	A0A0D1CY44_USTMA	A0A0D1BZU8_USTMA	A0A0D1DTD9_USTMA	A0A0D1CDF8_USTMA	A0A0D1DRK5_USTMA	A0A0D1E3F7_USTMA	A0A0D1E902_USTMA	A0A0D1E6N8_USTMA
molecular_function	GO:0016491	oxidoreductase activity	23	123	0.186992	1.82436e-07	1	0	1	KMO_USTMA	A0A0D1CCW2_USTMA	A0A0D1BXC0_USTMA	A0A0D1EA36_USTMA	A0A0D1CYE8_USTMA	A0A0D1DZK0_USTMA	A0A0D1CFX5_USTMA	A0A0D1DU21_USTMA	A0A0D1E806_USTMA	A0A0D1DU62_USTMA	A0A0D1BZX3_USTMA	A0A0D1CA24_USTMA	A0A0D1E8J9_USTMA	A0A0D1CS00_USTMA	A0A0D1CZZ7_USTMA	A0A0D1E1J4_USTMA	A0A0D1C4W0_USTMA	A0A0D1DP71_USTMA	A0A0D1CEQ7_USTMA	A0A0D1C2K9_USTMA	A0A0D1E082_USTMA	A0A0D1DQX0_USTMA	A0A0D1DTP7_USTMA
molecular_function	GO:0003676	nucleic acid binding	21	65	0.323077	0.991448	0.0108832	1	0.904	PRP5_USTMA	A0A0D1C0T4_USTMA	A0A0D1DXU9_USTMA	A0A0D1CEK8_USTMA	A0A0D1DX30_USTMA	A0A0D1CWM4_USTMA	A0A0D1DZK7_USTMA	A0A0D1E6C3_USTMA	A0A0D1DXM4_USTMA	A0A0D1E5R9_USTMA	A0A0D1E8R8_USTMA	A0A0D1CN71_USTMA	A0A0D1EDE9_USTMA	A0A0D1CFV9_USTMA	A0A0D1CCP2_USTMA	A0A0D1C7N3_USTMA	A0A0D1CVA8_USTMA	A0A0D1D1G7_USTMA	A0A0D1C528_USTMA	A0A0D1CQL4_USTMA	A0A0D1DTE1_USTMA
cellular_component	GO:0005783	endoplasmic reticulum	19	104	0.182692	0.0414235	0.970209	0.968	1	SEY1_USTMA	A0A0D1E930_USTMA	A0A0D1C6D2_USTMA	A0A0D1DZT1_USTMA	A0A0D1CAH9_USTMA	A0A0D1E967_USTMA	A0A0D1DSP1_USTMA	A0A0D1CAQ9_USTMA	A0A0D1CLF4_USTMA	A0A0D1DTY6_USTMA	A0A0D1E2P6_USTMA	A0A0D1DV12_USTMA	A0A0D1DV47_USTMA	A0A0D1DXU0_USTMA	A0A0D1E449_USTMA	A0A0D1BX68_USTMA	A0A0D1C041_USTMA	A0A0D1CJE8_USTMA	A0A0D1DSD4_USTMA
molecular_function	GO:0005525	GTP binding	19	96	0.197917	0.235024	0.835366	1	1	SEY1_USTMA	TBB_USTMA	A0A0D1DRS6_USTMA	A0A0D1CBB6_USTMA	A0A0D1DPI1_USTMA	A0A0D1DXM4_USTMA	A0A0D1DS67_USTMA	A0A0D1DQS9_USTMA	A0A0D1DVG4_USTMA	A0A0D1CIZ5_USTMA	A0A0D1CGU1_USTMA	A0A0D1C5I7_USTMA	A0A0D1CRQ3_USTMA	A0A0D1BUD1_USTMA	A0A0D1CU96_USTMA	A0A0D1CG54_USTMA	A0A0D1DPL8_USTMA	A0A0D1DWA0_USTMA	A0A0D1DSI9_USTMA
biological_process	GO:0006468	protein phosphorylation	18	35	0.514286	0.999999	2.172e-06	1	0	SSN3_USTMA	STE20_USTMA	EAF11_USTMA	A0A0D1DYS4_USTMA	A0A0D1BXP5_USTMA	A0A0D1C217_USTMA	A0A0D1CXP7_USTMA	A0A0D1E669_USTMA	A0A0D1CRA9_USTMA	A0A0D1CH37_USTMA	A0A0D1BZL7_USTMA	A0A0D1DSL6_USTMA	A0A0D1E676_USTMA	A0A0D1CXM3_USTMA	A0A0D1BVS5_USTMA	A0A0D1CAA1_USTMA	A0A0D1DU39_USTMA	A0A0D1DS71_USTMA
biological_process	GO:0006886	intracellular protein transport	17	78	0.217949	0.564276	0.499398	1	1	SEC23_USTMA	A0A0D1E930_USTMA	A0A0D1BWQ9_USTMA	A0A0D1DRS6_USTMA	A0A0D1E150_USTMA	A0A0D1CZ19_USTMA	A0A0D1DZ93_USTMA	A0A0D1C8P8_USTMA	A0A0D1DYV8_USTMA	A0A0D1CEI5_USTMA	A0A0D1CXE3_USTMA	A0A0D1DRH1_USTMA	A0A0D1DWV8_USTMA	A0A0D1DTY6_USTMA	A0A0D1BUD1_USTMA	A0A0D1C041_USTMA	A0A0D1DVC9_USTMA
biological_process	GO:0006281	DNA repair	16	50	0.32	0.999564	0.000791894	1	0.239	RAD5_USTMA	TOF1_USTMA	EAF11_USTMA	A0A0D1DV67_USTMA	A0A0D1DS11_USTMA	A0A0D1DZD7_USTMA	A0A0D1C3F5_USTMA	A0A0D1C4H8_USTMA	A0A0D1DZK1_USTMA	A0A0D1DTM4_USTMA	A0A0D1CB29_USTMA	A0A0D1C325_USTMA	A0A0D1E8A3_USTMA	A0A0D1CQL4_USTMA	A0A0D1C0S5_USTMA	A0A0D1E876_USTMA
biological_process	GO:0006351	transcription, DNA-templated	16	49	0.326531	0.999105	0.00134037	1	0.497	A0A0D1C8D7_USTMA	A0A0D1DYX7_USTMA	A0A0D1CF85_USTMA	A0A0D1E529_USTMA	A0A0D1E461_USTMA	A0A0D1E6F1_USTMA	A0A0D1C1L8_USTMA	A0A0D1CNA7_USTMA	A0A0D1C0E5_USTMA	A0A0D1EB74_USTMA	A0A0D1DTF5_USTMA	A0A0D1E492_USTMA	A0A0D1CF38_USTMA	A0A0D1E179_USTMA	A0A0D1CHF9_USTMA	A0A0D1CGN3_USTMA
biological_process	GO:0006511	ubiquitin-dependent protein catabolic process	16	46	0.347826	0.946781	0.0761923	1	1	A0A0D1CNF6_USTMA	A0A0D1E4L3_USTMA	A0A0D1EDM6_USTMA	A0A0D1DYV9_USTMA	A0A0D1CFW7_USTMA	A0A0D1DZ97_USTMA	A0A0D1E8M1_USTMA	A0A0D1CF44_USTMA	A0A0D1DVE1_USTMA	A0A0D1BWR7_USTMA	A0A0D1DZ94_USTMA	A0A0D1D0N8_USTMA	A0A0D1E5J9_USTMA	A0A0D1EBZ2_USTMA	A0A0D1E084_USTMA	A0A0D1CFJ5_USTMA
biological_process	GO:0045944	positive regulation of transcription by RNA polymerase II	15	40	0.375	0.84578	0.234874	1	1	STUA_USTMA	PACC_USTMA	A0A0D1E0G9_USTMA	A0A0D1C178_USTMA	A0A0D1DNQ9_USTMA	A0A0D1EB74_USTMA	A0A0D1CY49_USTMA	A0A0D1DXZ0_USTMA	A0A0D1E6E9_USTMA	A0A0D1BVP4_USTMA	A0A0D1C149_USTMA	A0A0D1DWA0_USTMA	A0A0D1E4F3_USTMA	A0A0D1E5N8_USTMA	A0A0D1CSE1_USTMA
molecular_function	GO:0061630	ubiquitin protein ligase activity	15	39	0.384615	0.997074	0.00763671	1	0.814	A0A0D1CFW7_USTMA	A0A0D1CR28_USTMA	A0A0D1CFV9_USTMA	A0A0D1CF44_USTMA	A0A0D1DVT1_USTMA	A0A0D1E797_USTMA	A0A0D1DXK6_USTMA	A0A0D1D0N8_USTMA	A0A0D1DX42_USTMA	A0A0D1EBB2_USTMA	A0A0D1C1Y7_USTMA	A0A0D1E876_USTMA	A0A0D1DUE5_USTMA	A0A0D1CWR4_USTMA	A0A0D1DYQ5_USTMA
biological_process	GO:0000724	double-strand break repair via homologous recombination	14	26	0.538462	0.998696	0.00345199	1	0.739	A0A0D1BXI7_USTMA	A0A0D1CDD4_USTMA	A0A0D1BZJ4_USTMA	A0A0D1CNT9_USTMA	A0A0D1C943_USTMA	A0A0D1C335_USTMA	A0A0D1E232_USTMA	A0A0D1CUQ8_USTMA	A0A0D1DS61_USTMA	A0A0D1CQL4_USTMA	A0A0D1EDV2_USTMA	A0A0D1CUI6_USTMA	A0A0D1CH81_USTMA	A0A0D1E3V2_USTMA
biological_process	GO:0043161	proteasome-mediated ubiquitin-dependent protein catabolic process	14	51	0.27451	0.780539	0.292184	1	1	A0A0D1E765_USTMA	A0A0D1D1K7_USTMA	A0A0D1DVA8_USTMA	A0A0D1E340_USTMA	A0A0D1DVT1_USTMA	A0A0D1DZK1_USTMA	A0A0D1E797_USTMA	A0A0D1DXK6_USTMA	A0A0D1DX42_USTMA	A0A0D1DZ73_USTMA	A0A0D1DYL9_USTMA	A0A0D1DNX0_USTMA	A0A0D1E936_USTMA	A0A0D1DYQ5_USTMA
biological_process	GO:0051301	cell division	14	42	0.333333	0.707565	0.394771	1	1	STU1_USTMA	A0A0D1DV67_USTMA	A0A0D1DYL5_USTMA	A0A0D1C4U8_USTMA	A0A0D1E553_USTMA	A0A0D1E114_USTMA	A0A0D1CMY2_USTMA	A0A0D1CA73_USTMA	A0A0D1DSI0_USTMA	A0A0D1DNV3_USTMA	A0A0D1E6Y5_USTMA	A0A0D1CTU9_USTMA	A0A0D1DSX4_USTMA	A0A0D1DVB6_USTMA
molecular_function	GO:0008017	microtubule binding	14	24	0.583333	0.999786	0.000841795	1	0.17	STU1_USTMA	A0A0D1DUI7_USTMA	A0A0D1CLV6_USTMA	A0A0D1DUD4_USTMA	A0A0D1CA73_USTMA	A0A0D1CRW1_USTMA	A0A0D1E377_USTMA	A0A0D1C5I7_USTMA	A0A0D1CRQ3_USTMA	A0A0D1DS04_USTMA	A0A0D1E206_USTMA	A0A0D1DQH0_USTMA	A0A0D1DPL8_USTMA	A0A0D1CX74_USTMA
biological_process	GO:0006897	endocytosis	13	37	0.351351	0.974641	0.0516541	1	1	SLA1_USTMA	MYO1_USTMA	A0A0D1DTJ9_USTMA	A0A0D1C917_USTMA	A0A0D1DY37_USTMA	A0A0D1E9M7_USTMA	A0A0D1DVN1_USTMA	A0A0D1C912_USTMA	A0A0D1E233_USTMA	A0A0D1DPJ0_USTMA	A0A0D1DYA9_USTMA	A0A0D1CRQ3_USTMA	A0A0D1C5J2_USTMA
biological_process	GO:0007165	signal transduction	13	24	0.541667	0.999983	3.2498e-05	1	0.015	A0A0D1DSN0_USTMA	A0A0D1DQJ2_USTMA	A0A0D1E6A7_USTMA	A0A0D1EAH3_USTMA	A0A0D1CE90_USTMA	A0A0D1BWE6_USTMA	A0A0D1CDF3_USTMA	A0A0D1BZN3_USTMA	A0A0D1DU77_USTMA	A0A0D1E5D9_USTMA	A0A0D1CIW0_USTMA	A0A0D1CG39_USTMA	A0A0D1DYK4_USTMA
molecular_function	GO:0003729	mRNA binding	12	65	0.184615	0.236835	0.843303	1	1	A0A0D1DZT6_USTMA	A0A0D1EBV9_USTMA	A0A0D1E1T0_USTMA	A0A0D1E4L6_USTMA	A0A0D1BY90_USTMA	A0A0D1E8Q2_USTMA	A0A0D1DXB8_USTMA	A0A0D1E299_USTMA	A0A0D1CIH4_USTMA	A0A0D1DTA6_USTMA	A0A0D1DU52_USTMA	A0A0D1C6D7_USTMA
molecular_function	GO:0003924	GTPase activity	12	79	0.151899	0.0484949	0.974793	0.997	1	SEY1_USTMA	A0A0D1DRS6_USTMA	A0A0D1CBB6_USTMA	A0A0D1DPI1_USTMA	A0A0D1DXM4_USTMA	A0A0D1DS67_USTMA	A0A0D1DVG4_USTMA	A0A0D1C5I7_USTMA	A0A0D1CRQ3_USTMA	A0A0D1BUD1_USTMA	A0A0D1E8H4_USTMA	A0A0D1DPL8_USTMA
biological_process	GO:0006606	protein import into nucleus	12	26	0.461538	0.998647	0.0044413	1	0.904	SEC13_USTMA	A0A0D1EB49_USTMA	A0A0D1CQI6_USTMA	A0A0D1E7Q3_USTMA	A0A0D1E6G4_USTMA	A0A0D1DS72_USTMA	A0A0D1DXA0_USTMA	A0A0D1DZU4_USTMA	A0A0D1BVD0_USTMA	A0A0D1CKD6_USTMA	A0A0D1E7Q1_USTMA	A0A0D1DY50_USTMA
molecular_function	GO:0106310	protein serine kinase activity	12	30	0.4	0.987608	0.0316051	1	1	SSN3_USTMA	STE20_USTMA	CHK1_USTMA	A0A0D1BUB7_USTMA	A0A0D1BZL7_USTMA	A0A0D1CL71_USTMA	A0A0D1DRE2_USTMA	A0A0D1E676_USTMA	A0A0D1DST4_USTMA	A0A0D1BVS5_USTMA	A0A0D1DX97_USTMA	A0A0D1DS71_USTMA
molecular_function	GO:0106311	protein serine/threonine kinase activity	12	31	0.387097	NA	NA	NA	NA	SSN3_USTMA	STE20_USTMA	CHK1_USTMA	A0A0D1BUB7_USTMA	A0A0D1BZL7_USTMA	A0A0D1CL71_USTMA	A0A0D1DRE2_USTMA	A0A0D1E676_USTMA	A0A0D1DST4_USTMA	A0A0D1BVS5_USTMA	A0A0D1DX97_USTMA	A0A0D1DS71_USTMA
molecular_function	GO:0003724	RNA helicase activity	12	32	0.375	0.977522	0.0519697	1	1	DBP4_USTMA	PRP5_USTMA	RRP3_USTMA	A0A0D1DX75_USTMA	A0A0D1E8R8_USTMA	A0A0D1CSU6_USTMA	A0A0D1EBS5_USTMA	A0A0D1DZB4_USTMA	A0A0D1E9W9_USTMA	A0A0D1CV54_USTMA	A0A0D1CGN6_USTMA	A0A0D1D0I7_USTMA
molecular_function	GO:0005096	GTPase activator activity	12	34	0.352941	0.999993	2.12715e-05	1	0.006	SEC23_USTMA	A0A0D1DUS2_USTMA	A0A0D1E150_USTMA	A0A0D1C912_USTMA	A0A0D1DVP8_USTMA	A0A0D1DSP2_USTMA	A0A0D1CD33_USTMA	A0A0D1CXE3_USTMA	A0A0D1DYA9_USTMA	A0A0D1DTD9_USTMA	A0A0D1CIW0_USTMA	A0A0D1E6N8_USTMA
biological_process	GO:0006891	intra-Golgi vesicle-mediated transport	12	24	0.5	0.998361	0.0058401	1	0.932	A0A0D1E930_USTMA	A0A0D1BWQ9_USTMA	A0A0D1E075_USTMA	A0A0D1DQ05_USTMA	A0A0D1C912_USTMA	A0A0D1DNV8_USTMA	A0A0D1E7D8_USTMA	A0A0D1CSF3_USTMA	A0A0D1DYA9_USTMA	A0A0D1DYF8_USTMA	A0A0D1DR17_USTMA	A0A0D1C4U4_USTMA
biological_process	GO:0055085	transmembrane transport	11	47	0.234043	0.00232383	0.998684	0.375	1	FER7_USTMA	A0A0D1E2C4_USTMA	A0A0D1E6N2_USTMA	A0A0D1CBL8_USTMA	A0A0D1C7B0_USTMA	A0A0D1E5F3_USTMA	A0A0D1E7M5_USTMA	A0A0D1E456_USTMA	A0A0D1E0N7_USTMA	A0A0D1BUY3_USTMA	A0A0D1CVX9_USTMA
cellular_component	GO:0000329	fungal-type vacuole membrane	11	48	0.229167	0.591884	0.529845	1	1	A0A0D1DZS5_USTMA	A0A0D1CGN9_USTMA	A0A0D1DVS1_USTMA	A0A0D1DMX3_USTMA	A0A0D1E0N7_USTMA	A0A0D1CI78_USTMA	A0A0D1CRQ3_USTMA	A0A0D1E277_USTMA	A0A0D1EA30_USTMA	A0A0D1CH16_USTMA	A0A0D1D198_USTMA
biological_process	GO:0006364	rRNA processing	11	67	0.164179	0.00692557	0.996176	0.75	1	DBP4_USTMA	NOP16_USTMA	IPI3_USTMA	RRP3_USTMA	A0A0D1BY56_USTMA	A0A0D1C1L3_USTMA	A0A0D1CH67_USTMA	A0A0D1BXS7_USTMA	A0A0D1C533_USTMA	A0A0D1DXZ8_USTMA	A0A0D1E6M7_USTMA
cellular_component	GO:0000139	Golgi membrane	11	43	0.255814	0.624964	0.492059	1	1	SEC23_USTMA	SNX3_USTMA	A0A0D1E930_USTMA	A0A0D1DU98_USTMA	A0A0D1DQ05_USTMA	A0A0D1DSP1_USTMA	A0A0D1CSH0_USTMA	A0A0D1CV69_USTMA	A0A0D1DV47_USTMA	A0A0D1C041_USTMA	A0A0D1DVC9_USTMA
biological_process	GO:0018105	peptidyl-serine phosphorylation	11	22	0.5	0.997708	0.00824525	1	0.962	A0A0D1DPJ8_USTMA	A0A0D1CQ38_USTMA	A0A0D1DPG6_USTMA	A0A0D1CL71_USTMA	A0A0D1DRE2_USTMA	A0A0D1DTH1_USTMA	A0A0D1CAE8_USTMA	A0A0D1BZG9_USTMA	A0A0D1E5D9_USTMA	A0A0D1DX97_USTMA	A0A0D1E724_USTMA
cellular_component	GO:0005794	Golgi apparatus	11	58	0.189655	0.858142	0.188393	1	1	A0A0D1E7D8_USTMA	A0A0D1CDK1_USTMA	A0A0D1DTY6_USTMA	A0A0D1E1P0_USTMA	A0A0D1E6S4_USTMA	A0A0D1DR17_USTMA	A0A0D1CHT8_USTMA	A0A0D1E793_USTMA	A0A0D1DWT3_USTMA	A0A0D1DSD4_USTMA	A0A0D1CXV0_USTMA
molecular_function	GO:0050660	flavin adenine dinucleotide binding	11	57	0.192982	0.1026	0.93839	1	1	A0A0D1EDM2_USTMA	A0A0D1CWP0_USTMA	A0A0D1E885_USTMA	A0A0D1CX43_USTMA	A0A0D1CSX2_USTMA	A0A0D1DXI8_USTMA	A0A0D1CA24_USTMA	A0A0D1DWV7_USTMA	A0A0D1E1J4_USTMA	A0A0D1DT90_USTMA	A0A0D1C2K9_USTMA
molecular_function	GO:0005509	calcium ion binding	11	36	0.305556	0.884591	0.204277	1	1	A0A0D1DTJ9_USTMA	A0A0D1DYS1_USTMA	A0A0D1CR16_USTMA	A0A0D1DVN1_USTMA	A0A0D1E0H0_USTMA	A0A0D1DZY4_USTMA	A0A0D1DPJ0_USTMA	A0A0D1DUR5_USTMA	A0A0D1CSH0_USTMA	A0A0D1DV47_USTMA	A0A0D1E1P0_USTMA
biological_process	GO:0005975	carbohydrate metabolic process	11	55	0.2	0.314634	0.743308	1	1	A0A0D1DZT0_USTMA	A0A0D1E4U1_USTMA	A0A0D1DXL6_USTMA	A0A0D1CGD9_USTMA	A0A0D1DY62_USTMA	A0A0D1DV47_USTMA	A0A0D1DZW9_USTMA	A0A0D1BUJ2_USTMA	A0A0D1E187_USTMA	A0A0D1E7V2_USTMA	A0A0D1DU09_USTMA
molecular_function	GO:0004843	thiol-dependent deubiquitinase	11	21	0.52381	0.999111	0.00369486	1	0.654	A0A0D1CNF6_USTMA	A0A0D1E634_USTMA	A0A0D1DZ97_USTMA	A0A0D1E8M1_USTMA	A0A0D1DVE1_USTMA	A0A0D1BWR7_USTMA	A0A0D1E5J9_USTMA	A0A0D1EBZ2_USTMA	A0A0D1C522_USTMA	A0A0D1BUU2_USTMA	A0A0D1E084_USTMA
biological_process	GO:0016567	protein ubiquitination	11	30	0.366667	0.948937	0.0859015	1	1	A0A0D1E4H5_USTMA	A0A0D1E114_USTMA	A0A0D1C1Y1_USTMA	A0A0D1CMY2_USTMA	A0A0D1CR28_USTMA	A0A0D1DVT1_USTMA	A0A0D1DZK1_USTMA	A0A0D1DXK6_USTMA	A0A0D1EBB2_USTMA	A0A0D1C1Y7_USTMA	A0A0D1CFJ5_USTMA
molecular_function	GO:0140603	obsolete ATP hydrolysis activity	10	43	0.232558	0.572515	0.570914	1	1	DBP4_USTMA	PRP5_USTMA	RRP3_USTMA	A0A0D1CX99_USTMA	A0A0D1E418_USTMA	A0A0D1DX75_USTMA	A0A0D1DZD7_USTMA	A0A0D1E7Z9_USTMA	A0A0D1DTM4_USTMA	A0A0D1CH16_USTMA
molecular_function	GO:0003682	chromatin binding	10	29	0.344828	0.763064	0.36027	1	1	A0A0D1E8E3_USTMA	A0A0D1CRL6_USTMA	A0A0D1CUH3_USTMA	A0A0D1CI18_USTMA	A0A0D1DZS4_USTMA	A0A0D1DWG5_USTMA	A0A0D1C3L5_USTMA	A0A0D1E243_USTMA	A0A0D1C149_USTMA	A0A0D1E2U9_USTMA
molecular_function	GO:0022857	transmembrane transporter activity	10	75	0.133333	0.00017411	0.999898	0.017	1	FER7_USTMA	HUT1_USTMA	A0A0D1C461_USTMA	A0A0D1E8K6_USTMA	A0A0D1CEU8_USTMA	A0A0D1E456_USTMA	A0A0D1E809_USTMA	A0A0D1E2F7_USTMA	A0A0D1CF73_USTMA	A0A0D1CVX9_USTMA
molecular_function	GO:0031267	small GTPase binding	10	16	0.625	0.999851	0.000938425	1	0.213	A0A0D1EB49_USTMA	A0A0D1CLP7_USTMA	A0A0D1DSP2_USTMA	A0A0D1CXZ5_USTMA	A0A0D1DZU4_USTMA	A0A0D1CKD6_USTMA	A0A0D1E7Q1_USTMA	A0A0D1DWT3_USTMA	A0A0D1E4J7_USTMA	A0A0D1DY50_USTMA
cellular_component	GO:0005874	microtubule	10	27	0.37037	0.988023	0.0275685	1	0.99	TBB_USTMA	A0A0D1DUI7_USTMA	A0A0D1E553_USTMA	A0A0D1BZI3_USTMA	A0A0D1DZW2_USTMA	A0A0D1CLV6_USTMA	A0A0D1CA73_USTMA	A0A0D1DS04_USTMA	A0A0D1E6Y5_USTMA	A0A0D1CX74_USTMA
biological_process	GO:0006888	endoplasmic reticulum to Golgi vesicle-mediated transport	10	48	0.208333	0.607869	0.514871	1	1	A0A0D1E930_USTMA	A0A0D1DU98_USTMA	A0A0D1CSW3_USTMA	A0A0D1C912_USTMA	A0A0D1DYA9_USTMA	A0A0D1DTY6_USTMA	A0A0D1DR17_USTMA	A0A0D1C041_USTMA	A0A0D1DWT3_USTMA	A0A0D1CJE8_USTMA
cellular_component	GO:0030176	integral component of endoplasmic reticulum membrane	10	47	0.212766	0.324013	0.780441	1	1	HUT1_USTMA	A0A0D1E956_USTMA	A0A0D1C6D2_USTMA	A0A0D1CL60_USTMA	A0A0D1CGI6_USTMA	A0A0D1CCS8_USTMA	A0A0D1DU23_USTMA	A0A0D1DTN0_USTMA	A0A0D1DSS3_USTMA	A0A0D1CJE8_USTMA
molecular_function	GO:0003700	DNA-binding transcription factor activity	10	26	0.384615	1	1.57296e-12	1	0	STUA_USTMA	A0A0D1E764_USTMA	A0A0D1E1E8_USTMA	A0A0D1E3B1_USTMA	A0A0D1C8H7_USTMA	A0A0D1E914_USTMA	A0A0D1DME6_USTMA	A0A0D1DRW6_USTMA	A0A0D1CQ15_USTMA	A0A0D1CSE1_USTMA
biological_process	GO:0007030	Golgi organization	10	17	0.588235	0.998361	0.0058401	1	0.932	A0A0D1BWQ9_USTMA	A0A0D1DU98_USTMA	A0A0D1E075_USTMA	A0A0D1CDK1_USTMA	A0A0D1DTY6_USTMA	A0A0D1E277_USTMA	A0A0D1DZ73_USTMA	A0A0D1DWT3_USTMA	A0A0D1C766_USTMA	A0A0D1DVC9_USTMA
biological_process	GO:0016579	protein deubiquitination	10	19	0.526316	0.991224	0.0250789	1	1	A0A0D1CNF6_USTMA	A0A0D1E634_USTMA	A0A0D1DZ97_USTMA	A0A0D1E8M1_USTMA	A0A0D1DVE1_USTMA	A0A0D1BWR7_USTMA	A0A0D1E5J9_USTMA	A0A0D1EBZ2_USTMA	A0A0D1C522_USTMA	A0A0D1E084_USTMA
molecular_function	GO:0000976	transcription cis-regulatory region binding	10	24	0.416667	1	2.20094e-07	1	0	A0A0D1E529_USTMA	A0A0D1E5Q5_USTMA	A0A0D1E6F1_USTMA	A0A0D1C1L8_USTMA	A0A0D1DWA4_USTMA	A0A0D1BW50_USTMA	A0A0D1E3N5_USTMA	A0A0D1E0N8_USTMA	A0A0D1DQR1_USTMA	A0A0D1DUR9_USTMA
cellular_component	GO:0000932	P-body	9	27	0.333333	0.928492	0.148473	1	1	A0A0D1DQ67_USTMA	A0A0D1DW69_USTMA	A0A0D1DQF4_USTMA	A0A0D1EA01_USTMA	A0A0D1DT60_USTMA	A0A0D1CXH6_USTMA	A0A0D1E1J8_USTMA	A0A0D1E4L2_USTMA	A0A0D1DMF3_USTMA
biological_process	GO:0000209	protein polyubiquitination	9	29	0.310345	0.948422	0.103996	1	1	PPIL2_USTMA	A0A0D1DZT1_USTMA	A0A0D1DVT1_USTMA	A0A0D1DXK6_USTMA	A0A0D1D0N8_USTMA	A0A0D1DUE5_USTMA	A0A0D1CWR4_USTMA	A0A0D1DYQ5_USTMA	A0A0D1BZS3_USTMA
molecular_function	GO:0035091	phosphatidylinositol binding	9	22	0.409091	0.999325	0.00209862	1	0.341	VPS27_USTMA	A0A0D1BYK2_USTMA	A0A0D1DWM5_USTMA	A0A0D1EDK7_USTMA	A0A0D1CRH0_USTMA	A0A0D1DU97_USTMA	A0A0D1E233_USTMA	A0A0D1CC30_USTMA	A0A0D1CDF3_USTMA
molecular_function	GO:0042626	ATPase-coupled transmembrane transporter activity	9	38	0.236842	0.423609	0.689006	1	1	A0A0D1E2C4_USTMA	A0A0D1E6N2_USTMA	A0A0D1CBL8_USTMA	A0A0D1E0Y3_USTMA	A0A0D1DTV7_USTMA	A0A0D1E0N7_USTMA	A0A0D1C566_USTMA	A0A0D1DZQ8_USTMA	A0A0D1BUY3_USTMA
cellular_component	GO:0005768	endosome	9	27	0.333333	0.984089	0.0279789	1	0.99	BRO1_USTMA	A0A0D1C917_USTMA	A0A0D1DWI0_USTMA	A0A0D1CZ19_USTMA	A0A0D1DY37_USTMA	A0A0D1E9M7_USTMA	A0A0D1E2K5_USTMA	A0A0D1DV89_USTMA	A0A0D1E277_USTMA
molecular_function	GO:0017056	structural constituent of nuclear pore	9	16	0.5625	0.999062	0.00465049	1	0.702	A0A0D1CZ47_USTMA	A0A0D1CQI6_USTMA	A0A0D1E7Q3_USTMA	A0A0D1E6S7_USTMA	A0A0D1E6G4_USTMA	A0A0D1DS72_USTMA	A0A0D1E1J0_USTMA	A0A0D1DXA0_USTMA	A0A0D1BVD0_USTMA
molecular_function	GO:0004386	helicase activity	8	15	0.533333	0.999706	0.000714794	1	0.15	RAD5_USTMA	A0A0D1C1G0_USTMA	A0A0D1E9H8_USTMA	A0A0D1DZJ5_USTMA	A0A0D1CY49_USTMA	A0A0D1DWU5_USTMA	A0A0D1C528_USTMA	A0A0D1DSV9_USTMA
cellular_component	GO:0005576	extracellular region	8	31	0.258065	0.7254	0.403424	1	1	XIN1_USTMA	A0A0D1CHC4_USTMA	A0A0D1E8D6_USTMA	A0A0D1CGD9_USTMA	A0A0D1CG62_USTMA	A0A0D1CLL2_USTMA	A0A0D1CX38_USTMA	A0A0D1BZQ4_USTMA
molecular_function	GO:0003779	actin binding	8	13	0.615385	0.906388	0.164766	1	1	SLA1_USTMA	CHS8_USTMA	A0A0D1DTJ9_USTMA	A0A0D1CLP7_USTMA	A0A0D1BX38_USTMA	A0A0D1CXZ5_USTMA	A0A0D1DPJ0_USTMA	A0A0D1E4J7_USTMA
molecular_function	GO:0043130	ubiquitin binding	8	23	0.347826	0.932215	0.149037	1	1	SLA1_USTMA	VPS27_USTMA	A0A0D1EDM6_USTMA	A0A0D1DPL0_USTMA	A0A0D1E233_USTMA	A0A0D1DZ73_USTMA	A0A0D1DYL9_USTMA	A0A0D1E5U7_USTMA
cellular_component	GO:0005643	nuclear pore	8	15	0.533333	0.998899	0.00365458	1	0.498	A0A0D1E1E4_USTMA	A0A0D1CZ47_USTMA	A0A0D1CS07_USTMA	A0A0D1E7Q3_USTMA	A0A0D1E6S7_USTMA	A0A0D1E6G4_USTMA	A0A0D1C246_USTMA	A0A0D1DXA0_USTMA
biological_process	GO:0031505	fungal-type cell wall organization	8	27	0.296296	0.851245	0.263982	1	1	CHS3_USTMA	A0A0D1E956_USTMA	A0A0D1E8D6_USTMA	A0A0D1CGI6_USTMA	A0A0D1CCS8_USTMA	A0A0D1DU23_USTMA	A0A0D1DSS3_USTMA	A0A0D1E5Y7_USTMA
molecular_function	GO:0019901	protein kinase binding	8	20	0.4	0.948376	0.120775	1	1	A0A0D1DQC1_USTMA	A0A0D1E7S6_USTMA	A0A0D1E669_USTMA	A0A0D1C1I9_USTMA	A0A0D1EAH3_USTMA	A0A0D1C730_USTMA	A0A0D1E2D4_USTMA	A0A0D1CXM3_USTMA
biological_process	GO:0030036	actin cytoskeleton organization	8	10	0.8	0.98374	0.0308607	1	1	A0A0D1DZ60_USTMA	A0A0D1BUR0_USTMA	A0A0D1CLP7_USTMA	A0A0D1BX38_USTMA	A0A0D1CXZ5_USTMA	A0A0D1BWE6_USTMA	A0A0D1CRQ3_USTMA	A0A0D1E4J7_USTMA
biological_process	GO:0006887	exocytosis	8	16	0.5	0.934274	0.146459	1	1	A0A0D1CBV0_USTMA	A0A0D1E8J8_USTMA	A0A0D1DV93_USTMA	A0A0D1DY75_USTMA	A0A0D1DYV8_USTMA	A0A0D1E5C3_USTMA	A0A0D1DRH1_USTMA	A0A0D1CLQ0_USTMA
molecular_function	GO:0003697	single-stranded DNA binding	7	35	0.2	0.382773	0.753687	1	1	A0A0D1E418_USTMA	A0A0D1DU59_USTMA	A0A0D1E0X0_USTMA	A0A0D1CXM0_USTMA	A0A0D1E3Q0_USTMA	A0A0D1E9U8_USTMA	A0A0D1CH81_USTMA
cellular_component	GO:0030479	actin cortical patch	7	23	0.304348	0.861568	0.266705	1	1	SLA1_USTMA	MYO1_USTMA	A0A0D1DTJ9_USTMA	A0A0D1CL95_USTMA	A0A0D1DZ93_USTMA	A0A0D1E233_USTMA	A0A0D1CRQ3_USTMA
molecular_function	GO:0016538	cyclin-dependent protein serine/threonine kinase regulator activity	7	15	0.466667	0.972273	0.0798864	1	1	A0A0D1DQC1_USTMA	A0A0D1E7S6_USTMA	A0A0D1E0H1_USTMA	A0A0D1C1I9_USTMA	A0A0D1C730_USTMA	A0A0D1E446_USTMA	A0A0D1CUI2_USTMA
molecular_function	GO:0031177	phosphopantetheine binding	7	9	0.777778	0.999936	0.000873126	1	0.188	SID2_USTMA	A0A0D1DMG7_USTMA	A0A0D1CHF1_USTMA	A0A0D1DUH7_USTMA	A0A0D1DVW4_USTMA	A0A0D1CBC4_USTMA	A0A0D1E8D3_USTMA
molecular_function	GO:0004725	protein tyrosine phosphatase activity	7	20	0.35	0.926246	0.167302	1	1	A0A0D1DU82_USTMA	A0A0D1DR65_USTMA	A0A0D1DPZ6_USTMA	A0A0D1BUB4_USTMA	A0A0D1E0C2_USTMA	A0A0D1CAA5_USTMA	A0A0D1E687_USTMA
molecular_function	GO:0003735	structural constituent of ribosome	7	139	0.0503597	2.44479e-09	1	0	1	A0A0D1CE85_USTMA	A0A0D1DXU6_USTMA	A0A0D1EDG3_USTMA	A0A0D1E3V3_USTMA	A0A0D1E9T3_USTMA	A0A0D1DNQ3_USTMA	A0A0D1E593_USTMA
biological_process	GO:0006412	translation	7	112	0.0625	1.35299e-05	0.999994	0.001	1	A0A0D1CE85_USTMA	A0A0D1DXU6_USTMA	A0A0D1EDG3_USTMA	A0A0D1E9T3_USTMA	A0A0D1DNQ3_USTMA	A0A0D1DVG4_USTMA	A0A0D1E593_USTMA
cellular_component	GO:0032040	small-subunit processome	7	35	0.2	0.423239	0.728648	1	1	UTP10_USTMA	DBP4_USTMA	A0A0D1E2E2_USTMA	A0A0D1CH67_USTMA	A0A0D1BZV5_USTMA	A0A0D1C533_USTMA	A0A0D1CY14_USTMA
cellular_component	GO:0005743	mitochondrial inner membrane	7	79	0.0886076	1.59316e-06	1	0	1	A0A0D1DYS1_USTMA	A0A0D1DQE3_USTMA	A0A0D1DSC1_USTMA	A0A0D1CNB0_USTMA	A0A0D1C1B5_USTMA	A0A0D1DVZ7_USTMA	A0A0D1C1D7_USTMA
biological_process	GO:0042147	retrograde transport, endosome to Golgi	7	26	0.269231	0.876908	0.228222	1	1	A0A0D1DWI0_USTMA	A0A0D1CZ19_USTMA	A0A0D1DYZ9_USTMA	A0A0D1DP71_USTMA	A0A0D1C5J2_USTMA	A0A0D1DR17_USTMA	A0A0D1C9Y1_USTMA
molecular_function	GO:0005507	copper ion binding	7	14	0.5	0.997438	0.0115124	1	0.917	A0A0D1BXC0_USTMA	A0A0D1DU21_USTMA	A0A0D1DU62_USTMA	A0A0D1EBR9_USTMA	A0A0D1C3J5_USTMA	A0A0D1DQX0_USTMA	A0A0D1E4F3_USTMA
biological_process	GO:0006631	fatty acid metabolic process	7	16	0.4375	0.434788	0.676292	1	1	A0A0D1CHF1_USTMA	A0A0D1DVW4_USTMA	A0A0D1E978_USTMA	A0A0D1E8D3_USTMA	A0A0D1DV12_USTMA	A0A0D1E299_USTMA	A0A0D1CRS7_USTMA
molecular_function	GO:0003712	transcription coregulator activity	7	25	0.28	0.967013	0.0643457	1	1	SRB8_USTMA	A0A0D1DS11_USTMA	A0A0D1DT32_USTMA	A0A0D1DSH3_USTMA	A0A0D1DMZ1_USTMA	A0A0D1CMK5_USTMA	A0A0D1DQR1_USTMA
biological_process	GO:0006406	mRNA export from nucleus	7	13	0.538462	0.976123	0.0550433	1	1	A0A0D1BY90_USTMA	A0A0D1E7Q3_USTMA	A0A0D1E159_USTMA	A0A0D1E6G4_USTMA	A0A0D1DS72_USTMA	A0A0D1EAJ2_USTMA	A0A0D1DT20_USTMA
molecular_function	GO:0003684	damaged DNA binding	7	21	0.333333	0.819834	0.324018	1	1	A0A0D1DRI5_USTMA	A0A0D1CDD4_USTMA	A0A0D1E2K8_USTMA	A0A0D1E8P9_USTMA	A0A0D1E5N9_USTMA	A0A0D1CUI6_USTMA	A0A0D1CH81_USTMA
biological_process	GO:0007264	small GTPase mediated signal transduction	7	17	0.411765	0.935648	0.12468	1	1	A0A0D1E892_USTMA	A0A0D1DSP2_USTMA	A0A0D1CY44_USTMA	A0A0D1DRK5_USTMA	A0A0D1E1H8_USTMA	A0A0D1E3F7_USTMA	A0A0D1E6N8_USTMA
biological_process	GO:0006890	retrograde vesicle-mediated transport, Golgi to endoplasmic reticulum	7	21	0.333333	0.882898	0.237328	1	1	A0A0D1C917_USTMA	A0A0D1E967_USTMA	A0A0D1CAQ9_USTMA	A0A0D1BX68_USTMA	A0A0D1CJE8_USTMA	A0A0D1E3K1_USTMA	A0A0D1DVC9_USTMA
biological_process	GO:0000079	regulation of cyclin-dependent protein serine/threonine kinase activity	7	12	0.583333	0.99764	0.0124941	1	0.993	A0A0D1DQC1_USTMA	A0A0D1E7S6_USTMA	A0A0D1E0H1_USTMA	A0A0D1C1I9_USTMA	A0A0D1C730_USTMA	A0A0D1E446_USTMA	A0A0D1CUI2_USTMA
cellular_component	GO:0017119	Golgi transport complex	7	7	1	1	3.39924e-05	1	0.004	A0A0D1BWQ9_USTMA	A0A0D1E075_USTMA	A0A0D1DQ05_USTMA	A0A0D1E7D8_USTMA	A0A0D1DYF8_USTMA	A0A0D1C4U4_USTMA	A0A0D1DVC9_USTMA
biological_process	GO:0007018	microtubule-based movement	7	16	0.4375	0.974921	0.0622081	1	1	A0A0D1DUI7_USTMA	A0A0D1DZW2_USTMA	A0A0D1CLV6_USTMA	A0A0D1DS04_USTMA	A0A0D1E206_USTMA	A0A0D1DQH0_USTMA	A0A0D1CX74_USTMA
molecular_function	GO:0008094	ATP-dependent activity, acting on DNA	6	13	0.461538	0.999721	0.000623244	1	0.096	MSH3_USTMA	A0A0D1C1L3_USTMA	A0A0D1CF39_USTMA	A0A0D1CQ83_USTMA	A0A0D1CY49_USTMA	A0A0D1E3Q0_USTMA
molecular_function	GO:0042802	identical protein binding	6	21	0.285714	0.633134	0.551097	1	1	SLA1_USTMA	DBP4_USTMA	A0A0D1DT43_USTMA	A0A0D1DZW1_USTMA	A0A0D1BZG9_USTMA	A0A0D1DPL8_USTMA
molecular_function	GO:0070615	ATP-dependent chromatin remodeler activity	6	17	0.352941	NA	NA	NA	NA	RAD5_USTMA	A0A0D1C1L3_USTMA	A0A0D1CFQ8_USTMA	A0A0D1CY49_USTMA	A0A0D1C335_USTMA	A0A0D1CWR4_USTMA
cellular_component	GO:0043231	intracellular membrane-bounded organelle	6	45	0.133333	0.994156	0.00722801	1	0.672	A0A0D1DZT0_USTMA	A0A0D1E0Y3_USTMA	A0A0D1DY37_USTMA	A0A0D1E641_USTMA	A0A0D1CIQ8_USTMA	A0A0D1DN85_USTMA
cellular_component	GO:0010008	endosome membrane	6	13	0.461538	0.895531	0.188325	1	1	SLA1_USTMA	VPS27_USTMA	A0A0D1DMX3_USTMA	A0A0D1CSH0_USTMA	A0A0D1C9Y1_USTMA	A0A0D1D198_USTMA
biological_process	GO:0016973	poly(A)+ mRNA export from nucleus	6	18	0.333333	0.873451	0.264071	1	1	A0A0D1DZT6_USTMA	A0A0D1CBA5_USTMA	A0A0D1CQI6_USTMA	A0A0D1DXA0_USTMA	A0A0D1EAJ2_USTMA	A0A0D1C6D7_USTMA
biological_process	GO:0006397	mRNA processing	6	32	0.1875	0.0245141	0.985056	0.992	1	CWC21_USTMA	A0A0D1BY90_USTMA	A0A0D1CFV9_USTMA	A0A0D1DT60_USTMA	A0A0D1CVA8_USTMA	A0A0D1E1J8_USTMA
biological_process	GO:0000398	mRNA splicing, via spliceosome	6	68	0.0882353	0.0122234	0.994019	0.917	1	PRP5_USTMA	A0A0D1C0T4_USTMA	A0A0D1CHJ8_USTMA	A0A0D1C1G0_USTMA	A0A0D1CTB2_USTMA	A0A0D1DZ58_USTMA
cellular_component	GO:0031966	mitochondrial membrane	6	15	0.4	0.000184206	0.999915	0.009	1	A0A0D1CJ01_USTMA	A0A0D1E6T7_USTMA	A0A0D1E978_USTMA	A0A0D1C5I7_USTMA	A0A0D1CRQ3_USTMA	A0A0D1DPL8_USTMA
cellular_component	GO:0005694	chromosome	6	12	0.5	0.993649	0.00973076	1	0.783	A0A0D1E1Y2_USTMA	A0A0D1DP16_USTMA	A0A0D1DSI0_USTMA	A0A0D1DTM4_USTMA	A0A0D1DNV3_USTMA	A0A0D1CQL4_USTMA
cellular_component	GO:0000785	chromatin	6	33	0.181818	0.507249	0.593827	1	1	A0A0D1DV67_USTMA	A0A0D1C3I0_USTMA	A0A0D1ECE5_USTMA	A0A0D1CUH3_USTMA	A0A0D1BZ81_USTMA	A0A0D1DZS4_USTMA
biological_process	GO:0000045	autophagosome assembly	6	16	0.375	0.891737	0.214386	1	1	ATG2_USTMA	A0A0D1E9M7_USTMA	A0A0D1DPG6_USTMA	A0A0D1E2D4_USTMA	A0A0D1DZ73_USTMA	A0A0D1CHU6_USTMA
biological_process	GO:0000184	nuclear-transcribed mRNA catabolic process, nonsense-mediated decay	6	8	0.75	0.999911	0.00115239	1	0.427	A0A0D1CXS6_USTMA	A0A0D1E8Q2_USTMA	A0A0D1EBS5_USTMA	A0A0D1CXH6_USTMA	A0A0D1E6T4_USTMA	A0A0D1DTA6_USTMA
cellular_component	GO:0071944	cell periphery	6	10	0.6	0.913935	0.109546	1	1	CHS8_USTMA	CHS5_USTMA	CHS1_USTMA	CHS6_USTMA	CHS3_USTMA	A0A0D1BUU2_USTMA
cellular_component	GO:0030428	cell septum	6	9	0.666667	0.999803	0.00155898	1	0.203	CHS8_USTMA	CHS5_USTMA	CHS1_USTMA	CHS6_USTMA	CHS3_USTMA	A0A0D1E0F1_USTMA
biological_process	GO:0071555	cell wall organization	6	17	0.352941	0.910918	0.152858	1	1	CHS8_USTMA	CHS5_USTMA	CHS1_USTMA	CHS6_USTMA	A0A0D1CGD9_USTMA	A0A0D1CG62_USTMA
cellular_component	GO:0000776	kinetochore	6	21	0.285714	0.876257	0.215648	1	1	A0A0D1DPJ8_USTMA	A0A0D1DYL5_USTMA	A0A0D1CA73_USTMA	A0A0D1DXU8_USTMA	A0A0D1DW01_USTMA	A0A0D1DTE9_USTMA
molecular_function	GO:0030170	pyridoxal phosphate binding	6	45	0.133333	0.070116	0.969885	1	1	A0A0D1CG70_USTMA	A0A0D1E0M3_USTMA	A0A0D1CRS2_USTMA	A0A0D1E2Z5_USTMA	A0A0D1DXU0_USTMA	A0A0D1E5G6_USTMA
biological_process	GO:0006623	protein targeting to vacuole	6	15	0.4	0.975174	0.0689641	1	1	A0A0D1C6E5_USTMA	A0A0D1CXP7_USTMA	A0A0D1E641_USTMA	A0A0D1DXQ1_USTMA	A0A0D1CRQ3_USTMA	A0A0D1DR17_USTMA
cellular_component	GO:0005777	peroxisome	6	28	0.214286	0.375415	0.738072	1	1	A0A0D1CWP0_USTMA	A0A0D1E9M7_USTMA	A0A0D1E6H3_USTMA	A0A0D1EDT9_USTMA	A0A0D1CRQ3_USTMA	A0A0D1DPL8_USTMA
cellular_component	GO:0005802	trans-Golgi network	6	17	0.352941	0.902134	0.217943	1	1	A0A0D1C917_USTMA	A0A0D1DWI0_USTMA	A0A0D1CSF3_USTMA	A0A0D1DV89_USTMA	A0A0D1E277_USTMA	A0A0D1DYZ3_USTMA
cellular_component	GO:0005669	transcription factor TFIID complex	6	13	0.461538	0.984541	0.0564359	1	1	A0A0D1E0G9_USTMA	A0A0D1DNQ9_USTMA	A0A0D1DQ53_USTMA	A0A0D1DNQ1_USTMA	A0A0D1E907_USTMA	A0A0D1CD17_USTMA
molecular_function	GO:0043565	sequence-specific DNA binding	6	16	0.375	1	5.1404e-07	1	0	STUA_USTMA	A0A0D1CCY4_USTMA	A0A0D1E1E8_USTMA	A0A0D1DQ32_USTMA	A0A0D1CRW9_USTMA	A0A0D1ED63_USTMA
molecular_function	GO:0000149	SNARE binding	6	15	0.4	0.850963	0.282061	1	1	A0A0D1DU73_USTMA	A0A0D1DY75_USTMA	A0A0D1C8P8_USTMA	A0A0D1DYV8_USTMA	A0A0D1DR17_USTMA	A0A0D1E2P1_USTMA
cellular_component	GO:0005778	peroxisomal membrane	6	18	0.333333	0.692629	0.488547	1	1	A0A0D1C902_USTMA	A0A0D1E6M2_USTMA	A0A0D1E5X2_USTMA	A0A0D1E299_USTMA	A0A0D1E3E8_USTMA	A0A0D1C6B6_USTMA
molecular_function	GO:0004197	cysteine-type endopeptidase activity	6	9	0.666667	0.990219	0.0405144	1	1	A0A0D1CNF6_USTMA	A0A0D1DZ97_USTMA	A0A0D1E266_USTMA	A0A0D1E5J9_USTMA	A0A0D1EBZ2_USTMA	A0A0D1E084_USTMA
cellular_component	GO:0000307	cyclin-dependent protein kinase holoenzyme complex	6	14	0.428571	0.94949	0.125491	1	1	A0A0D1DQC1_USTMA	A0A0D1E7S6_USTMA	A0A0D1E0H1_USTMA	A0A0D1C1I9_USTMA	A0A0D1C730_USTMA	A0A0D1E446_USTMA
cellular_component	GO:0005856	cytoskeleton	6	16	0.375	0.990226	0.0160869	1	0.956	A0A0D1E1D6_USTMA	A0A0D1CL71_USTMA	A0A0D1E146_USTMA	A0A0D1DU66_USTMA	A0A0D1DPJ0_USTMA	A0A0D1BZ40_USTMA
biological_process	GO:0046854	phosphatidylinositol phosphate biosynthetic process	6	9	0.666667	0.998848	0.00885996	1	0.975	A0A0D1E9M7_USTMA	A0A0D1DMX3_USTMA	A0A0D1DX37_USTMA	A0A0D1E9A4_USTMA	A0A0D1E277_USTMA	A0A0D1D198_USTMA
biological_process	GO:0006310	DNA recombination	6	14	0.428571	0.996722	0.00645717	1	0.943	A0A0D1DRI5_USTMA	A0A0D1DZD7_USTMA	A0A0D1C3F5_USTMA	A0A0D1CPS3_USTMA	A0A0D1E8A3_USTMA	A0A0D1CQL4_USTMA
cellular_component	GO:0000145	exocyst	6	9	0.666667	0.999217	0.00647814	1	0.652	A0A0D1CBV0_USTMA	A0A0D1DV93_USTMA	A0A0D1DY75_USTMA	A0A0D1E5C3_USTMA	A0A0D1DRH1_USTMA	A0A0D1CLQ0_USTMA
biological_process	GO:0006893	Golgi to plasma membrane transport	6	9	0.666667	0.966001	0.102136	1	1	A0A0D1DV93_USTMA	A0A0D1E5C3_USTMA	A0A0D1DRH1_USTMA	A0A0D1CLQ0_USTMA	A0A0D1DX52_USTMA	A0A0D1DYZ3_USTMA
biological_process	GO:0006378	mRNA polyadenylation	5	11	0.454545	0.950834	0.146523	1	1	CLP1_USTMA	A0A0D1BZU2_USTMA	A0A0D1BUW4_USTMA	A0A0D1DTE1_USTMA	A0A0D1DWQ1_USTMA
molecular_function	GO:0042393	histone binding	5	23	0.217391	0.673937	0.495355	1	1	A0A0D1CUH3_USTMA	A0A0D1CY49_USTMA	A0A0D1DPK8_USTMA	A0A0D1C149_USTMA	A0A0D1DT98_USTMA
molecular_function	GO:0003713	transcription coactivator activity	5	13	0.384615	0.939297	0.168175	1	1	MED6_USTMA	A0A0D1E0G9_USTMA	A0A0D1DNQ9_USTMA	A0A0D1DQ53_USTMA	A0A0D1E2U9_USTMA
cellular_component	GO:0005887	integral component of plasma membrane	5	47	0.106383	0.0248703	0.991391	0.851	1	FER7_USTMA	A0A0D1DP15_USTMA	A0A0D1E8D6_USTMA	A0A0D1E456_USTMA	A0A0D1CPY9_USTMA
biological_process	GO:0006260	DNA replication	5	15	0.333333	0.892151	0.163143	1	1	A0A0D1DZD7_USTMA	A0A0D1BZ81_USTMA	A0A0D1DSD0_USTMA	A0A0D1E5Z9_USTMA	A0A0D1E3V2_USTMA
cellular_component	GO:0016592	mediator complex	5	16	0.3125	0.858775	0.300629	1	1	SSN3_USTMA	MED6_USTMA	SRB8_USTMA	A0A0D1DMZ1_USTMA	A0A0D1DQR1_USTMA
biological_process	GO:0000462	maturation of SSU-rRNA from tricistronic rRNA transcript (SSU-rRNA, 5.8S rRNA, LSU-rRNA)	5	27	0.185185	0.185867	0.906208	1	1	UTP10_USTMA	BFR2_USTMA	RRP3_USTMA	A0A0D1DS67_USTMA	A0A0D1DNQ3_USTMA
biological_process	GO:0030433	ubiquitin-dependent ERAD pathway	5	24	0.208333	0.445623	0.735059	1	1	A0A0D1CL60_USTMA	A0A0D1DZT1_USTMA	A0A0D1DV47_USTMA	A0A0D1DX55_USTMA	A0A0D1BZS3_USTMA
molecular_function	GO:0051082	unfolded protein binding	5	50	0.1	0.012916	0.99587	0.767	1	A0A0D1DT43_USTMA	A0A0D1CAH9_USTMA	A0A0D1CBQ6_USTMA	A0A0D1C026_USTMA	A0A0D1DU35_USTMA
biological_process	GO:0051321	meiotic cell cycle	5	10	0.5	0.986603	0.0278353	1	1	TOF1_USTMA	A0A0D1BZI3_USTMA	A0A0D1CA81_USTMA	A0A0D1CUI6_USTMA	A0A0D1CSE1_USTMA
molecular_function	GO:0000049	tRNA binding	5	25	0.2	0.406588	0.764319	1	1	A0A0D1E0S3_USTMA	A0A0D1C8D3_USTMA	A0A0D1C3X4_USTMA	A0A0D1CXX4_USTMA	A0A0D1CDX3_USTMA
cellular_component	GO:0019898	extrinsic component of membrane	5	7	0.714286	0.692102	0.464216	1	1	ATG2_USTMA	A0A0D1DRV9_USTMA	A0A0D1CUV6_USTMA	A0A0D1C6E5_USTMA	A0A0D1E2D4_USTMA
cellular_component	GO:0030659	cytoplasmic vesicle membrane	5	11	0.454545	0.965497	0.0698897	1	1	CHS8_USTMA	CHS5_USTMA	CHS1_USTMA	CHS6_USTMA	CHS3_USTMA
molecular_function	GO:0004100	chitin synthase activity	5	8	0.625	0.997059	0.0206448	1	1	CHS8_USTMA	CHS5_USTMA	CHS1_USTMA	CHS6_USTMA	CHS3_USTMA
molecular_function	GO:0004842	ubiquitin-protein transferase activity	5	12	0.416667	0.97245	0.0496947	1	1	BRE1_USTMA	A0A0D1DSV8_USTMA	A0A0D1E4H5_USTMA	A0A0D1C1Y1_USTMA	A0A0D1E876_USTMA
molecular_function	GO:0046982	protein heterodimerization activity	5	29	0.172414	0.293684	0.844591	1	1	A0A0D1E0G9_USTMA	A0A0D1DNQ9_USTMA	A0A0D1DP16_USTMA	A0A0D1DQ53_USTMA	A0A0D1DNQ1_USTMA
cellular_component	GO:0005654	nucleoplasm	5	17	0.294118	0.614272	0.462956	1	1	ERB1_USTMA	A0A0D1BY56_USTMA	A0A0D1C8Q3_USTMA	A0A0D1DQY1_USTMA	A0A0D1CIG6_USTMA
molecular_function	GO:0051015	actin filament binding	5	27	0.185185	0.328798	0.820751	1	1	MYO1_USTMA	A0A0D1C868_USTMA	A0A0D1DWW8_USTMA	A0A0D1CIW0_USTMA	A0A0D1DQB3_USTMA
biological_process	GO:0006506	GPI anchor biosynthetic process	5	19	0.263158	0.676201	0.507996	1	1	A0A0D1CGF9_USTMA	A0A0D1CKY9_USTMA	A0A0D1EBQ5_USTMA	A0A0D1E102_USTMA	A0A0D1DSV0_USTMA
cellular_component	GO:0005741	mitochondrial outer membrane	5	12	0.416667	0.823448	0.308098	1	1	KMO_USTMA	A0A0D1CA24_USTMA	A0A0D1CW84_USTMA	A0A0D1DSN1_USTMA	A0A0D1DPL8_USTMA
molecular_function	GO:0071949	FAD binding	5	35	0.142857	0.137269	0.938492	1	1	KMO_USTMA	A0A0D1CWP0_USTMA	A0A0D1DVK4_USTMA	A0A0D1C4W0_USTMA	A0A0D1E6T7_USTMA
biological_process	GO:0006974	cellular response to DNA damage stimulus	5	12	0.416667	0.99996	7.74909e-05	1	0.033	A0A0D1C1Y1_USTMA	A0A0D1E9U8_USTMA	A0A0D1CFJ5_USTMA	A0A0D1CWR4_USTMA	A0A0D1E5Z9_USTMA
molecular_function	GO:0004672	protein kinase activity	5	20	0.25	0.999704	0.000618552	1	0.092	EAF11_USTMA	A0A0D1CLZ9_USTMA	A0A0D1E2I8_USTMA	A0A0D1CA81_USTMA	A0A0D1E312_USTMA
biological_process	GO:0042273	ribosomal large subunit biogenesis	5	17	0.294118	0.425405	0.691946	1	1	NOP16_USTMA	A0A0D1C8Q3_USTMA	A0A0D1BUR0_USTMA	A0A0D1E6C3_USTMA	A0A0D1DXE3_USTMA
molecular_function	GO:0003887	DNA-directed DNA polymerase activity	5	12	0.416667	0.959486	0.12684	1	1	A0A0D1E2K8_USTMA	A0A0D1DPX6_USTMA	A0A0D1E5N9_USTMA	A0A0D1CE68_USTMA	A0A0D1E3V2_USTMA
biological_process	GO:0006298	mismatch repair	5	14	0.357143	0.928423	0.175417	1	1	MSH3_USTMA	A0A0D1DQ00_USTMA	A0A0D1CQ83_USTMA	A0A0D1CPS3_USTMA	A0A0D1C3U8_USTMA
cellular_component	GO:0072686	mitotic spindle	5	11	0.454545	0.983386	0.0538671	1	1	STU1_USTMA	A0A0D1E553_USTMA	A0A0D1E266_USTMA	A0A0D1E6Y5_USTMA	A0A0D1DTE9_USTMA
cellular_component	GO:0009986	cell surface	5	12	0.416667	0.962476	0.119764	1	1	A0A0D1CHC4_USTMA	A0A0D1E8D6_USTMA	A0A0D1CGD9_USTMA	A0A0D1CG62_USTMA	A0A0D1CX38_USTMA
biological_process	GO:0009251	glucan catabolic process	5	15	0.333333	0.882898	0.237328	1	1	A0A0D1CHC4_USTMA	A0A0D1DS99_USTMA	A0A0D1DXM8_USTMA	A0A0D1CX38_USTMA	A0A0D1DTR4_USTMA
biological_process	GO:0006470	protein dephosphorylation	5	17	0.294118	0.736018	0.416675	1	1	A0A0D1DU82_USTMA	A0A0D1DR65_USTMA	A0A0D1CI23_USTMA	A0A0D1E0C2_USTMA	A0A0D1DTT8_USTMA
molecular_function	GO:0015926	glucosidase activity	5	8	0.625	0.983128	0.0409104	1	1	A0A0D1E956_USTMA	A0A0D1CGI6_USTMA	A0A0D1CCS8_USTMA	A0A0D1DU23_USTMA	A0A0D1DSS3_USTMA
biological_process	GO:0006078	(1->6)-beta-D-glucan biosynthetic process	5	8	0.625	0.996278	0.0247918	1	1	A0A0D1E956_USTMA	A0A0D1CGI6_USTMA	A0A0D1CCS8_USTMA	A0A0D1DU23_USTMA	A0A0D1DSS3_USTMA
cellular_component	GO:0005938	cell cortex	5	15	0.333333	0.965759	0.059364	1	1	A0A0D1DSL6_USTMA	A0A0D1DUD4_USTMA	A0A0D1E7N8_USTMA	A0A0D1BZG9_USTMA	A0A0D1DS71_USTMA
biological_process	GO:0006874	cellular calcium ion homeostasis	5	14	0.357143	0.638766	0.56381	1	1	A0A0D1DXI2_USTMA	A0A0D1DSP1_USTMA	A0A0D1E0H0_USTMA	A0A0D1DUR5_USTMA	A0A0D1CH16_USTMA
molecular_function	GO:0042162	telomeric DNA binding	5	6	0.833333	0.998247	0.00978076	1	0.899	A0A0D1DRI5_USTMA	A0A0D1EAT9_USTMA	A0A0D1C0Z7_USTMA	A0A0D1E6T4_USTMA	A0A0D1DYY3_USTMA
cellular_component	GO:0000228	nuclear chromosome	5	5	1	0.934207	0.107838	1	1	A0A0D1C1L3_USTMA	A0A0D1DT32_USTMA	A0A0D1DSH3_USTMA	A0A0D1CM04_USTMA	A0A0D1CSE1_USTMA
molecular_function	GO:0031956	medium-chain fatty acid-CoA ligase activity	5	9	0.555556	0.992923	0.037604	1	1	A0A0D1CHF1_USTMA	A0A0D1DVW4_USTMA	A0A0D1E8D3_USTMA	A0A0D1E299_USTMA	A0A0D1CRS7_USTMA
molecular_function	GO:0001228	DNA-binding transcription activator activity, RNA polymerase II-specific	5	9	0.555556	0.992923	0.037604	1	1	A0A0D1DQ81_USTMA	A0A0D1D1U5_USTMA	A0A0D1E6Z4_USTMA	A0A0D1E465_USTMA	A0A0D1DW67_USTMA
cellular_component	GO:0031201	SNARE complex	5	16	0.3125	0.858775	0.300629	1	1	A0A0D1E967_USTMA	A0A0D1C8P8_USTMA	A0A0D1DYV8_USTMA	A0A0D1DR17_USTMA	A0A0D1BX68_USTMA
cellular_component	GO:0005770	late endosome	5	15	0.333333	0.692102	0.464216	1	1	A0A0D1DU73_USTMA	A0A0D1CXP7_USTMA	A0A0D1DXQ1_USTMA	A0A0D1DP71_USTMA	A0A0D1CRQ3_USTMA
biological_process	GO:0043087	regulation of GTPase activity	5	9	0.555556	0.914577	0.179012	1	1	A0A0D1CE90_USTMA	A0A0D1CDF3_USTMA	A0A0D1BZN3_USTMA	A0A0D1CNN3_USTMA	A0A0D1CIW0_USTMA
biological_process	GO:0061025	membrane fusion	5	7	0.714286	0.925668	0.148755	1	1	A0A0D1C5I7_USTMA	A0A0D1CRQ3_USTMA	A0A0D1DZ73_USTMA	A0A0D1C041_USTMA	A0A0D1DPL8_USTMA
cellular_component	GO:0035861	site of double-strand break	4	12	0.333333	0.880236	0.291697	1	1	A0A0D1BXI7_USTMA	A0A0D1DZK1_USTMA	A0A0D1DS61_USTMA	A0A0D1CH81_USTMA
biological_process	GO:0036297	interstrand cross-link repair	4	10	0.4	0.853477	0.334708	1	1	A0A0D1CX99_USTMA	A0A0D1C0K3_USTMA	A0A0D1CQ83_USTMA	A0A0D1E8P9_USTMA
biological_process	GO:0000723	telomere maintenance	4	9	0.444444	0.9825	0.0491517	1	1	A0A0D1DRI5_USTMA	A0A0D1DZD7_USTMA	A0A0D1BXI7_USTMA	A0A0D1DS61_USTMA
biological_process	GO:0043044	chromatin remodeling	4	13	0.307692	NA	NA	NA	NA	A0A0D1CI18_USTMA	A0A0D1CY49_USTMA	A0A0D1C0V7_USTMA	A0A0D1E243_USTMA
biological_process	GO:0006270	DNA replication initiation	4	14	0.285714	0.720267	0.459945	1	1	A0A0D1CFS9_USTMA	A0A0D1E0X0_USTMA	A0A0D1DYS5_USTMA	A0A0D1C3L5_USTMA
cellular_component	GO:0000124	SAGA complex	4	14	0.285714	0.796635	0.409383	1	1	A0A0D1DS11_USTMA	A0A0D1E0G9_USTMA	A0A0D1DNQ9_USTMA	A0A0D1CMK5_USTMA
cellular_component	GO:0005681	spliceosomal complex	4	27	0.148148	0.0264354	0.986418	0.877	1	CWC21_USTMA	A0A0D1C1G0_USTMA	A0A0D1E9W9_USTMA	A0A0D1C7N3_USTMA
molecular_function	GO:0051539	4 iron, 4 sulfur cluster binding	4	34	0.117647	0.0723308	0.973647	1	1	NAR1_USTMA	LEUC_USTMA	A0A0D1DTM4_USTMA	A0A0D1E3V2_USTMA
molecular_function	GO:0005198	structural molecule activity	4	13	0.307692	0.000127546	0.999945	0.01	1	SEC13_USTMA	A0A0D1E930_USTMA	A0A0D1DZ93_USTMA	A0A0D1DZ94_USTMA
biological_process	GO:0051028	mRNA transport	4	7	0.571429	0.995199	0.0122608	1	0.992	SEC13_USTMA	A0A0D1CZ47_USTMA	A0A0D1E6S7_USTMA	A0A0D1DTA6_USTMA
molecular_function	GO:0000287	magnesium ion binding	4	38	0.105263	0.037229	0.987771	0.992	1	A0A0D1C917_USTMA	A0A0D1C5S0_USTMA	A0A0D1CG54_USTMA	A0A0D1BYF8_USTMA
biological_process	GO:0006879	cellular iron ion homeostasis	4	13	0.307692	0.802748	0.361234	1	1	SIDA_USTMA	A0A0D1CKH5_USTMA	A0A0D1E5G0_USTMA	A0A0D1E4F3_USTMA
biological_process	GO:0034599	cellular response to oxidative stress	4	27	0.148148	0.108558	0.957697	1	1	A0A0D1CH46_USTMA	A0A0D1CWC2_USTMA	A0A0D1BUZ1_USTMA	A0A0D1BVT0_USTMA
cellular_component	GO:0000781	chromosome, telomeric region	4	16	0.25	0.694802	0.503812	1	1	A0A0D1DRI5_USTMA	A0A0D1EAT9_USTMA	A0A0D1BZL7_USTMA	A0A0D1C0Z7_USTMA
cellular_component	GO:0005759	mitochondrial matrix	4	36	0.111111	0.000570197	0.999806	0.033	1	TRM5_USTMA	A0A0D1CGU1_USTMA	A0A0D1DQ65_USTMA	A0A0D1CDX3_USTMA
biological_process	GO:0000289	nuclear-transcribed mRNA poly(A) tail shortening	4	6	0.666667	0.988377	0.0655775	1	1	A0A0D1EA01_USTMA	A0A0D1DT60_USTMA	A0A0D1E1J8_USTMA	A0A0D1DMF3_USTMA
cellular_component	GO:0071014	post-mRNA release spliceosomal complex	4	19	0.210526	0.694802	0.503812	1	1	A0A0D1DZT6_USTMA	A0A0D1C357_USTMA	A0A0D1CFZ9_USTMA	A0A0D1C6D7_USTMA
biological_process	GO:0008033	tRNA processing	4	12	0.333333	0.469308	0.638536	1	1	A0A0D1DXZ8_USTMA	A0A0D1CG54_USTMA	A0A0D1DWA0_USTMA	A0A0D1E280_USTMA
biological_process	GO:0000278	mitotic cell cycle	4	21	0.190476	0.879017	0.163193	1	1	TBB_USTMA	A0A0D1BZI3_USTMA	A0A0D1E6E9_USTMA	A0A0D1E6Y5_USTMA
cellular_component	GO:0034045	phagophore assembly site membrane	4	9	0.444444	0.942819	0.180245	1	1	ATG2_USTMA	A0A0D1DRV9_USTMA	A0A0D1DPG6_USTMA	A0A0D1E2D4_USTMA
biological_process	GO:0000422	autophagy of mitochondrion	4	13	0.307692	0.897864	0.242727	1	1	ATG2_USTMA	A0A0D1DRV9_USTMA	A0A0D1DPG6_USTMA	A0A0D1E2D4_USTMA
biological_process	GO:0034727	piecemeal microautophagy of the nucleus	4	10	0.4	0.96917	0.105958	1	1	ATG2_USTMA	A0A0D1CUV6_USTMA	A0A0D1DPG6_USTMA	A0A0D1E2D4_USTMA
cellular_component	GO:0000324	fungal-type vacuole	4	27	0.148148	0.330486	0.758419	1	1	A0A0D1CBL8_USTMA	A0A0D1E3W7_USTMA	A0A0D1E4H6_USTMA	A0A0D1BUY3_USTMA
cellular_component	GO:1990904	ribonucleoprotein complex	4	19	0.210526	2.98671e-06	0.999999	0.001	1	A0A0D1DZT6_USTMA	A0A0D1E1T0_USTMA	A0A0D1E733_USTMA	A0A0D1C6D7_USTMA
cellular_component	GO:0030687	preribosome, large subunit precursor	4	26	0.153846	0.384712	0.780385	1	1	ERB1_USTMA	A0A0D1BY56_USTMA	A0A0D1E6C3_USTMA	A0A0D1CG36_USTMA
molecular_function	GO:0005506	iron ion binding	4	41	0.097561	0.0832169	0.961198	1	1	A0A0D1E816_USTMA	A0A0D1C4W0_USTMA	A0A0D1DV12_USTMA	A0A0D1E4T3_USTMA
cellular_component	GO:0000407	phagophore assembly site	4	9	0.444444	0.983386	0.0538671	1	1	ATG2_USTMA	A0A0D1CUV6_USTMA	A0A0D1E9M7_USTMA	A0A0D1DU97_USTMA
molecular_function	GO:0032266	phosphatidylinositol-3-phosphate binding	4	8	0.5	0.979355	0.0931555	1	1	ATG2_USTMA	SNX3_USTMA	A0A0D1DRV9_USTMA	A0A0D1CZ19_USTMA
biological_process	GO:0030242	autophagy of peroxisome	4	5	0.8	0.995841	0.0347463	1	1	ATG2_USTMA	A0A0D1E9M7_USTMA	A0A0D1CXP7_USTMA	A0A0D1E2D4_USTMA
biological_process	GO:0016226	iron-sulfur cluster assembly	4	15	0.266667	0.735929	0.460238	1	1	NAR1_USTMA	A0A0D1E1R3_USTMA	A0A0D1C4H8_USTMA	A0A0D1E5F4_USTMA
cellular_component	GO:0016514	SWI/SNF complex	4	7	0.571429	0.991121	0.0538028	1	1	A0A0D1E5Q5_USTMA	A0A0D1DSH3_USTMA	A0A0D1DXZ0_USTMA	A0A0D1DQR1_USTMA
cellular_component	GO:0071013	catalytic step 2 spliceosome	4	32	0.125	0.113734	0.950684	1	1	A0A0D1BXS7_USTMA	A0A0D1DZB4_USTMA	A0A0D1CTB2_USTMA	A0A0D1E876_USTMA
molecular_function	GO:0017108	5'-flap endonuclease activity	4	9	0.444444	0.962396	0.137597	1	1	A0A0D1DU59_USTMA	A0A0D1CPS3_USTMA	A0A0D1DTM4_USTMA	A0A0D1DZ35_USTMA
cellular_component	GO:0005635	nuclear envelope	4	14	0.285714	0.995128	0.0110432	1	0.803	A0A0D1EB49_USTMA	A0A0D1DTE9_USTMA	A0A0D1DZU4_USTMA	A0A0D1E7Q1_USTMA
cellular_component	GO:0030015	CCR4-NOT core complex	4	6	0.666667	0.996868	0.028132	1	0.996	A0A0D1DQ67_USTMA	A0A0D1DQF4_USTMA	A0A0D1EA01_USTMA	A0A0D1DMF3_USTMA
biological_process	GO:0000002	mitochondrial genome maintenance	4	11	0.363636	0.824583	0.350595	1	1	MDM34_USTMA	MDM12_USTMA	A0A0D1DZD7_USTMA	A0A0D1C5I7_USTMA
cellular_component	GO:0005871	kinesin complex	4	8	0.5	0.980792	0.0883975	1	1	A0A0D1DUI7_USTMA	A0A0D1CLV6_USTMA	A0A0D1DS04_USTMA	A0A0D1CX74_USTMA
biological_process	GO:0032543	mitochondrial translation	4	16	0.25	0.660227	0.499967	1	1	GATA_USTMA	A0A0D1CBB6_USTMA	A0A0D1E3V3_USTMA	A0A0D1CV38_USTMA
molecular_function	GO:0016791	phosphatase activity	4	15	0.266667	0.821197	0.24826	1	1	CYAA_USTMA	A0A0D1CT47_USTMA	A0A0D1CT81_USTMA	A0A0D1CHV9_USTMA
molecular_function	GO:0000977	RNA polymerase II transcription regulatory region sequence-specific DNA binding	4	10	0.4	0.999993	2.12715e-05	1	0.006	A0A0D1CSL8_USTMA	A0A0D1D1U5_USTMA	A0A0D1E0F6_USTMA	A0A0D1E914_USTMA
cellular_component	GO:0032153	cell division site	4	17	0.235294	0.692926	0.454084	1	1	A0A0D1EBL3_USTMA	A0A0D1D1B0_USTMA	A0A0D1E1L9_USTMA	A0A0D1DPL8_USTMA
cellular_component	GO:0051286	cell tip	4	7	0.571429	0.994712	0.0162388	1	0.956	MYO1_USTMA	A0A0D1E8J8_USTMA	A0A0D1E6A7_USTMA	A0A0D1DVE7_USTMA
molecular_function	GO:0050661	NADP binding	4	21	0.190476	0.431562	0.761471	1	1	A0A0D1EDM2_USTMA	A0A0D1CSX2_USTMA	A0A0D1DXI8_USTMA	A0A0D1CA24_USTMA
biological_process	GO:0007015	actin filament organization	4	18	0.222222	0.201372	0.891609	1	1	MYO1_USTMA	A0A0D1DY37_USTMA	A0A0D1CRA9_USTMA	A0A0D1E233_USTMA
molecular_function	GO:0010181	FMN binding	4	18	0.222222	0.581081	0.638953	1	1	A0A0D1BV38_USTMA	A0A0D1DP09_USTMA	A0A0D1CA24_USTMA	A0A0D1E1J4_USTMA
biological_process	GO:0000122	negative regulation of transcription by RNA polymerase II	4	21	0.190476	0.264941	0.87416	1	1	A0A0D1BWL5_USTMA	A0A0D1DR64_USTMA	A0A0D1CDB5_USTMA	A0A0D1E0F6_USTMA
biological_process	GO:0006338	chromatin remodeling	4	12	0.333333	0.17574	0.897838	1	1	A0A0D1DT32_USTMA	A0A0D1DSH3_USTMA	A0A0D1E2U9_USTMA	A0A0D1BWW9_USTMA
molecular_function	GO:0003714	transcription corepressor activity	4	12	0.333333	0.87316	0.303398	1	1	A0A0D1CDB5_USTMA	A0A0D1E8N3_USTMA	A0A0D1CYH1_USTMA	A0A0D1E9W0_USTMA
cellular_component	GO:0005793	endoplasmic reticulum-Golgi intermediate compartment	4	12	0.333333	0.796635	0.409383	1	1	A0A0D1E930_USTMA	A0A0D1DU98_USTMA	A0A0D1DTY6_USTMA	A0A0D1CHT8_USTMA
biological_process	GO:0009058	biosynthetic process	4	13	0.307692	0.0175447	0.985692	0.971	1	A0A0D1DMG7_USTMA	A0A0D1CFA0_USTMA	A0A0D1DRG9_USTMA	A0A0D1CAM1_USTMA
cellular_component	GO:0042729	DASH complex	4	9	0.444444	0.96488	0.131019	1	1	A0A0D1DX71_USTMA	A0A0D1CUN2_USTMA	A0A0D1E553_USTMA	A0A0D1E6Y5_USTMA
molecular_function	GO:0004553	hydrolase activity, hydrolyzing O-glycosyl compounds	4	26	0.153846	0.9204	0.121631	1	1	A0A0D1DXL6_USTMA	A0A0D1DS99_USTMA	A0A0D1DXM8_USTMA	A0A0D1DU09_USTMA
molecular_function	GO:0003824	catalytic activity	4	36	0.111111	0.000425374	0.999675	0.042	1	A0A0D1DWT5_USTMA	A0A0D1BWP5_USTMA	A0A0D1DRG9_USTMA	A0A0D1BYF8_USTMA
biological_process	GO:0006629	lipid metabolic process	4	30	0.133333	0.0858279	0.935082	1	1	A0A0D1DVZ5_USTMA	A0A0D1CW22_USTMA	A0A0D1DTN0_USTMA	A0A0D1E135_USTMA
biological_process	GO:0007064	mitotic sister chromatid cohesion	4	6	0.666667	0.999675	0.00372158	1	0.87	A0A0D1E8E3_USTMA	A0A0D1DV67_USTMA	A0A0D1C4U8_USTMA	A0A0D1CRL6_USTMA
biological_process	GO:0071028	nuclear mRNA surveillance	4	9	0.444444	0.649405	0.576012	1	1	A0A0D1DZT6_USTMA	A0A0D1E248_USTMA	A0A0D1C4N8_USTMA	A0A0D1C6D7_USTMA
molecular_function	GO:0008139	nuclear localization sequence binding	4	6	0.666667	0.996607	0.0298601	1	1	A0A0D1CZ47_USTMA	A0A0D1CIG6_USTMA	A0A0D1CKD6_USTMA	A0A0D1DY50_USTMA
cellular_component	GO:0005819	spindle	4	7	0.571429	0.992877	0.0182305	1	0.961	A0A0D1DPJ8_USTMA	A0A0D1DYT4_USTMA	A0A0D1E377_USTMA	A0A0D1DVE7_USTMA
molecular_function	GO:0016279	protein-lysine N-methyltransferase activity	4	12	0.333333	0.944798	0.134561	1	1	A0A0D1CWM4_USTMA	A0A0D1CWG8_USTMA	A0A0D1E6V2_USTMA	A0A0D1E157_USTMA
biological_process	GO:0006302	double-strand break repair	4	7	0.571429	0.99993	0.000194244	1	0.077	A0A0D1CM71_USTMA	A0A0D1CXM0_USTMA	A0A0D1C0V7_USTMA	A0A0D1E1Y0_USTMA
molecular_function	GO:0046983	protein dimerization activity	4	20	0.2	0.17047	0.903824	1	1	A0A0D1E922_USTMA	A0A0D1DYZ3_USTMA	A0A0D1E351_USTMA	A0A0D1E5N8_USTMA
cellular_component	GO:0012505	endomembrane system	4	21	0.190476	0.793457	0.238998	1	1	A0A0D1DXI2_USTMA	A0A0D1C8P8_USTMA	A0A0D1DYV8_USTMA	A0A0D1BUD1_USTMA
cellular_component	GO:0009277	fungal-type cell wall	4	15	0.266667	0.648242	0.575056	1	1	A0A0D1CGD9_USTMA	A0A0D1CG62_USTMA	A0A0D1E869_USTMA	A0A0D1CKI0_USTMA
biological_process	GO:0006303	double-strand break repair via nonhomologous end joining	4	8	0.5	0.928191	0.211608	1	1	A0A0D1DRI5_USTMA	A0A0D1BXI7_USTMA	A0A0D1E8P9_USTMA	A0A0D1CE68_USTMA
biological_process	GO:0032012	regulation of ARF protein signal transduction	4	5	0.8	0.99913	0.0143551	1	0.999	A0A0D1E8B2_USTMA	A0A0D1DUS2_USTMA	A0A0D1D186_USTMA	A0A0D1BZU8_USTMA
molecular_function	GO:0015095	magnesium ion transmembrane transporter activity	4	7	0.571429	0.99042	0.0569002	1	1	A0A0D1E8H2_USTMA	A0A0D1E7T5_USTMA	A0A0D1C1B5_USTMA	A0A0D1CBN9_USTMA
cellular_component	GO:0044732	mitotic spindle pole body	4	10	0.4	0.914503	0.234386	1	1	A0A0D1CUN2_USTMA	A0A0D1E553_USTMA	A0A0D1E266_USTMA	A0A0D1D1W6_USTMA
biological_process	GO:0031573	mitotic intra-S DNA damage checkpoint signaling	4	5	0.8	0.99913	0.0143551	1	0.999	A0A0D1BXI7_USTMA	A0A0D1E1Y0_USTMA	A0A0D1DS61_USTMA	A0A0D1C0S5_USTMA
biological_process	GO:0070588	calcium ion transmembrane transport	4	10	0.4	0.757273	0.459976	1	1	A0A0D1DXI2_USTMA	A0A0D1DSP1_USTMA	A0A0D1E0H0_USTMA	A0A0D1DUR5_USTMA
cellular_component	GO:0031932	TORC2 complex	4	6	0.666667	0.996868	0.028132	1	0.996	A0A0D1DZS5_USTMA	A0A0D1DYU5_USTMA	A0A0D1DP54_USTMA	A0A0D1E5Y7_USTMA
biological_process	GO:0046856	phosphatidylinositol dephosphorylation	4	11	0.363636	0.853477	0.334708	1	1	A0A0D1E0C2_USTMA	A0A0D1E449_USTMA	A0A0D1E5P2_USTMA	A0A0D1BVU2_USTMA
cellular_component	GO:0030915	Smc5-Smc6 complex	4	5	0.8	0.999354	0.0114654	1	0.871	A0A0D1C3F5_USTMA	A0A0D1CNT9_USTMA	A0A0D1EDV2_USTMA	A0A0D1CH81_USTMA
molecular_function	GO:1990939	microtubule motor activity	4	7	0.571429	NA	NA	NA	NA	A0A0D1DUI7_USTMA	A0A0D1DS04_USTMA	A0A0D1E206_USTMA	A0A0D1CX74_USTMA
molecular_function	GO:0003777	microtubule motor activity	4	7	0.571429	0.996374	0.0169608	1	0.996	A0A0D1DUI7_USTMA	A0A0D1CLV6_USTMA	A0A0D1DS04_USTMA	A0A0D1CX74_USTMA
biological_process	GO:0006289	nucleotide-excision repair	4	16	0.25	0.25104	0.872755	1	1	A0A0D1DU59_USTMA	A0A0D1E4P9_USTMA	A0A0D1DS61_USTMA	A0A0D1CUI6_USTMA
molecular_function	GO:0008324	cation transmembrane transporter activity	4	8	0.5	0.0137566	0.992288	0.812	1	A0A0D1DSM4_USTMA	A0A0D1CZL9_USTMA	A0A0D1DPJ6_USTMA	A0A0D1CKG8_USTMA
molecular_function	GO:0000030	mannosyltransferase activity	4	8	0.5	0.758425	0.414442	1	1	A0A0D1CLF4_USTMA	A0A0D1CV69_USTMA	A0A0D1DSV0_USTMA	A0A0D1CFY9_USTMA
cellular_component	GO:0005680	anaphase-promoting complex	4	11	0.363636	0.914503	0.234386	1	1	A0A0D1E114_USTMA	A0A0D1CMY2_USTMA	A0A0D1CTU9_USTMA	A0A0D1DSX4_USTMA
biological_process	GO:0031145	anaphase-promoting complex-dependent catabolic process	4	10	0.4	0.894042	0.27198	1	1	A0A0D1E114_USTMA	A0A0D1CMY2_USTMA	A0A0D1CTU9_USTMA	A0A0D1DSX4_USTMA
biological_process	GO:0050790	regulation of catalytic activity	4	6	0.666667	0.980108	0.0348007	1	1	A0A0D1CS07_USTMA	A0A0D1E669_USTMA	A0A0D1CXM3_USTMA	A0A0D1C246_USTMA
biological_process	GO:0018107	peptidyl-threonine phosphorylation	4	7	0.571429	0.988377	0.0655775	1	1	A0A0D1CRA9_USTMA	A0A0D1CL71_USTMA	A0A0D1DU66_USTMA	A0A0D1E724_USTMA
biological_process	GO:0006807	nitrogen compound metabolic process	4	12	0.333333	0.355425	0.672903	1	1	A0A0D1E0Z5_USTMA	A0A0D1E223_USTMA	A0A0D1DTC4_USTMA	A0A0D1DV82_USTMA
molecular_function	GO:0005484	SNAP receptor activity	4	14	0.285714	0.786086	0.423331	1	1	A0A0D1C8P8_USTMA	A0A0D1DYV8_USTMA	A0A0D1DR17_USTMA	A0A0D1BX68_USTMA
biological_process	GO:0007004	telomere maintenance via telomerase	4	5	0.8	0.975208	0.106363	1	1	A0A0D1EAT9_USTMA	A0A0D1C0Z7_USTMA	A0A0D1DYY3_USTMA	A0A0D1CUI6_USTMA
biological_process	GO:0007059	chromosome segregation	3	10	0.3	0.988393	0.0213988	1	1	YU309_USTMA	A0A0D1DPJ8_USTMA	A0A0D1E6Y5_USTMA
cellular_component	GO:0005847	mRNA cleavage and polyadenylation specificity factor complex	3	8	0.375	0.911602	0.273527	1	1	A0A0D1BZU2_USTMA	A0A0D1DTE1_USTMA	A0A0D1DWQ1_USTMA
molecular_function	GO:0003690	double-stranded DNA binding	3	11	0.272727	0.99999	2.09533e-05	1	0.006	A0A0D1CXM0_USTMA	A0A0D1E3Q0_USTMA	A0A0D1E5Z9_USTMA
biological_process	GO:0007131	reciprocal meiotic recombination	3	6	0.5	0.903073	0.21823	1	1	A0A0D1CM04_USTMA	A0A0D1C335_USTMA	A0A0D1DX65_USTMA
biological_process	GO:0045493	xylan catabolic process	3	4	0.75	0.996433	0.0477544	1	1	XIN1_USTMA	A0A0D1CLL2_USTMA	A0A0D1BZQ4_USTMA
biological_process	GO:0016197	endosomal transport	3	5	0.6	0.852411	0.229235	1	1	SLA1_USTMA	A0A0D1DTJ9_USTMA	A0A0D1DVN1_USTMA
biological_process	GO:0006325	chromatin organization	3	10	0.3	0.418389	0.661516	1	1	SWC5_USTMA	EAF11_USTMA	A0A0D1CPX3_USTMA
molecular_function	GO:0016740	transferase activity	3	16	0.1875	0.966824	0.0407935	1	1	ORF1_USTMA	A0A0D1BVQ6_USTMA	A0A0D1DSY4_USTMA
biological_process	GO:0006457	protein folding	3	41	0.0731707	0.000423763	0.999901	0.069	1	PPIL2_USTMA	A0A0D1C026_USTMA	A0A0D1DU35_USTMA
molecular_function	GO:0051537	2 iron, 2 sulfur cluster binding	3	16	0.1875	0.46254	0.761661	1	1	A0A0D1CKH5_USTMA	A0A0D1C4W0_USTMA	A0A0D1E5F4_USTMA
biological_process	GO:0008380	RNA splicing	3	16	0.1875	0.00832676	0.99574	0.812	1	CWC21_USTMA	A0A0D1C357_USTMA	A0A0D1CVA8_USTMA
cellular_component	GO:0031080	nuclear pore outer ring	3	4	0.75	0.997191	0.0404434	1	0.999	SEC13_USTMA	A0A0D1CQI6_USTMA	A0A0D1DS72_USTMA
biological_process	GO:0044550	secondary metabolite biosynthetic process	3	7	0.428571	0.950834	0.146523	1	1	SID2_USTMA	A0A0D1DVK4_USTMA	A0A0D1DUH7_USTMA
cellular_component	GO:0030686	90S preribosome	3	11	0.272727	0.691902	0.475567	1	1	UTP10_USTMA	A0A0D1E2E2_USTMA	A0A0D1BZV5_USTMA
biological_process	GO:0042276	error-prone translesion synthesis	3	6	0.5	0.965254	0.16096	1	1	A0A0D1E2K8_USTMA	A0A0D1E5N9_USTMA	A0A0D1E3V2_USTMA
biological_process	GO:0032147	activation of protein kinase activity	3	3	1	0.995841	0.0347463	1	1	STE20_USTMA	A0A0D1BZL7_USTMA	A0A0D1E676_USTMA
biological_process	GO:0043408	regulation of MAPK cascade	3	3	1	0.928191	0.211608	1	1	STE20_USTMA	A0A0D1BZL7_USTMA	A0A0D1E676_USTMA
biological_process	GO:0030488	tRNA methylation	3	12	0.25	0.540024	0.703769	1	1	TRM5_USTMA	A0A0D1CBR1_USTMA	A0A0D1E6X6_USTMA
molecular_function	GO:0000166	nucleotide binding	3	25	0.12	0.960818	0.0477393	1	1	A0A0D1CUQ8_USTMA	A0A0D1E8H4_USTMA	A0A0D1E3V2_USTMA
biological_process	GO:0000226	microtubule cytoskeleton organization	3	13	0.230769	0.18384	0.895343	1	1	TBB_USTMA	STU1_USTMA	A0A0D1E377_USTMA
biological_process	GO:0045943	positive regulation of transcription by RNA polymerase I	3	4	0.75	0.996433	0.0477544	1	1	UTP10_USTMA	A0A0D1E9H8_USTMA	A0A0D1ECQ1_USTMA
molecular_function	GO:0016747	acyltransferase activity, transferring groups other than amino-acyl groups	3	8	0.375	0.0672491	0.960226	1	1	UAT1_USTMA	A0A0D1DXL6_USTMA	A0A0D1E4X5_USTMA
biological_process	GO:0061709	reticulophagy	3	6	0.5	0.965254	0.16096	1	1	ATG2_USTMA	A0A0D1DPG6_USTMA	A0A0D1E2D4_USTMA
cellular_component	GO:0000151	ubiquitin ligase complex	3	10	0.3	0.752741	0.356762	1	1	A0A0D1EBB2_USTMA	A0A0D1DYQ5_USTMA	A0A0D1BZS3_USTMA
biological_process	GO:0006896	Golgi to vacuole transport	3	10	0.3	0.788392	0.458487	1	1	A0A0D1C8P8_USTMA	A0A0D1DYZ9_USTMA	A0A0D1DR17_USTMA
molecular_function	GO:0008289	lipid binding	3	15	0.2	0.962689	0.063418	1	1	MDM34_USTMA	MDM12_USTMA	A0A0D1E151_USTMA
cellular_component	GO:0016459	myosin complex	3	4	0.75	0.997191	0.0404434	1	0.999	CHS8_USTMA	MYO1_USTMA	A0A0D1DWW8_USTMA
cellular_component	GO:0005758	mitochondrial intermembrane space	3	23	0.130435	0.138195	0.949884	1	1	A0A0D1DQS9_USTMA	A0A0D1E3G6_USTMA	A0A0D1C5I7_USTMA
biological_process	GO:0033617	mitochondrial cytochrome c oxidase assembly	3	14	0.214286	0.540024	0.703769	1	1	A0A0D1E130_USTMA	A0A0D1E6E5_USTMA	A0A0D1CMC7_USTMA
biological_process	GO:0006744	ubiquinone biosynthetic process	3	10	0.3	0.72802	0.528427	1	1	KMO_USTMA	A0A0D1E292_USTMA	A0A0D1BWP5_USTMA
cellular_component	GO:0008180	COP9 signalosome	3	7	0.428571	0.946197	0.204103	1	1	A0A0D1E4L3_USTMA	A0A0D1D204_USTMA	A0A0D1CWZ4_USTMA
molecular_function	GO:0004222	metalloendopeptidase activity	3	14	0.214286	0.576669	0.672028	1	1	A0A0D1E8B7_USTMA	A0A0D1DZX1_USTMA	A0A0D1E0I2_USTMA
biological_process	GO:0000266	mitochondrial fission	3	8	0.375	0.893637	0.308178	1	1	A0A0D1C5I7_USTMA	A0A0D1CRQ3_USTMA	A0A0D1DPL8_USTMA
biological_process	GO:0006284	base-excision repair	3	10	0.3	0.323552	0.85412	1	1	A0A0D1EAB3_USTMA	A0A0D1BVK3_USTMA	A0A0D1CE68_USTMA
molecular_function	GO:0004315	3-oxoacyl-[acyl-carrier-protein] synthase activity	3	3	1	1	0.0128492	1	0.989	FAS2_USTMA	A0A0D1C5S0_USTMA	A0A0D1CLM3_USTMA
biological_process	GO:0006487	protein N-linked glycosylation	3	25	0.12	0.109138	0.953331	1	1	A0A0D1E6X0_USTMA	A0A0D1CFY9_USTMA	A0A0D1BVT0_USTMA
biological_process	GO:0007049	cell cycle	3	12	0.25	0.987367	0.0184549	1	1	CWC2_USTMA	A0A0D1D1D2_USTMA	A0A0D1DSX4_USTMA
biological_process	GO:0000463	maturation of LSU-rRNA from tricistronic rRNA transcript (SSU-rRNA, 5.8S rRNA, LSU-rRNA)	3	11	0.272727	0.807484	0.397905	1	1	ERB1_USTMA	A0A0D1CUN7_USTMA	A0A0D1E1Q9_USTMA
biological_process	GO:0006696	ergosterol biosynthetic process	3	23	0.130435	0.149024	0.945448	1	1	A0A0D1CA24_USTMA	A0A0D1EDT9_USTMA	A0A0D1E3E8_USTMA
biological_process	GO:0006635	fatty acid beta-oxidation	3	17	0.176471	0.264941	0.87416	1	1	FER4_USTMA	A0A0D1E6H3_USTMA	A0A0D1E0P3_USTMA
biological_process	GO:0016236	macroautophagy	3	10	0.3	0.679084	0.455992	1	1	A0A0D1CXP7_USTMA	A0A0D1CI78_USTMA	A0A0D1DPL8_USTMA
molecular_function	GO:0034511	U3 snoRNA binding	3	7	0.428571	0.9431	0.211789	1	1	DBP4_USTMA	A0A0D1E2E2_USTMA	A0A0D1DS67_USTMA
biological_process	GO:0000387	spliceosomal snRNP assembly	3	11	0.272727	0.897864	0.242727	1	1	CWC2_USTMA	A0A0D1BXS7_USTMA	A0A0D1CGN6_USTMA
molecular_function	GO:0004806	triglyceride lipase activity	3	10	0.3	0.811336	0.427222	1	1	A0A0D1DVZ5_USTMA	A0A0D1E4K3_USTMA	A0A0D1E6B2_USTMA
biological_process	GO:0016573	histone acetylation	3	13	0.230769	0.676201	0.507996	1	1	A0A0D1DS11_USTMA	A0A0D1E0G9_USTMA	A0A0D1E5B1_USTMA
biological_process	GO:0016575	histone deacetylation	3	8	0.375	0.665292	0.592999	1	1	A0A0D1BWL5_USTMA	A0A0D1E8N3_USTMA	A0A0D1DU17_USTMA
cellular_component	GO:0030173	integral component of Golgi membrane	3	18	0.166667	0.545841	0.669481	1	1	HUT1_USTMA	A0A0D1DRN0_USTMA	A0A0D1CJE8_USTMA
biological_process	GO:0006541	glutamine metabolic process	3	13	0.230769	0.480342	0.749797	1	1	GUAA_USTMA	A0A0D1C3H6_USTMA	A0A0D1E223_USTMA
biological_process	GO:0015914	phospholipid transport	3	6	0.5	0.927066	0.192516	1	1	MDM34_USTMA	MDM12_USTMA	A0A0D1E3G6_USTMA
molecular_function	GO:0016779	nucleotidyltransferase activity	3	9	0.333333	0.933163	0.109476	1	1	A0A0D1E0S3_USTMA	A0A0D1C8D3_USTMA	A0A0D1DTK8_USTMA
biological_process	GO:0006491	N-glycan processing	3	7	0.428571	0.982396	0.0718089	1	1	A0A0D1E064_USTMA	A0A0D1DV47_USTMA	A0A0D1DU09_USTMA
cellular_component	GO:0046540	U4/U6 x U5 tri-snRNP complex	3	21	0.142857	0.251614	0.894062	1	1	A0A0D1CHJ8_USTMA	A0A0D1BXS7_USTMA	A0A0D1CTB2_USTMA
biological_process	GO:0016192	vesicle-mediated transport	3	29	0.103448	0.984407	0.0226826	1	1	A0A0D1DRS6_USTMA	A0A0D1DWV8_USTMA	A0A0D1E1H8_USTMA
cellular_component	GO:0032300	mismatch repair complex	3	8	0.375	0.911602	0.273527	1	1	MSH3_USTMA	A0A0D1CQ83_USTMA	A0A0D1C3U8_USTMA
molecular_function	GO:0030983	mismatched DNA binding	3	9	0.333333	0.811336	0.427222	1	1	MSH3_USTMA	A0A0D1CF39_USTMA	A0A0D1CQ83_USTMA
biological_process	GO:0016042	lipid catabolic process	3	10	0.3	0.186305	0.887976	1	1	A0A0D1CR16_USTMA	A0A0D1CZJ9_USTMA	A0A0D1E6B2_USTMA
biological_process	GO:0006914	autophagy	3	8	0.375	0.548713	0.56972	1	1	A0A0D1DU97_USTMA	A0A0D1E381_USTMA	A0A0D1C766_USTMA
molecular_function	GO:0004721	phosphoprotein phosphatase activity	3	9	0.333333	0.786486	0.326614	1	1	TIM50_USTMA	A0A0D1CJ43_USTMA	A0A0D1CMI3_USTMA
molecular_function	GO:0016746	acyltransferase activity	3	9	0.333333	0.0770145	0.951522	1	1	A0A0D1DMG7_USTMA	A0A0D1CFA0_USTMA	A0A0D1E790_USTMA
biological_process	GO:0006367	transcription initiation from RNA polymerase II promoter	3	15	0.2	0.420694	0.731922	1	1	A0A0D1E6I9_USTMA	A0A0D1E0G9_USTMA	A0A0D1DNQ1_USTMA
molecular_function	GO:0060090	molecular adaptor activity	3	9	0.333333	0.734196	0.39379	1	1	A0A0D1DQ67_USTMA	A0A0D1E2D4_USTMA	A0A0D1CTU9_USTMA
cellular_component	GO:0030134	COPII-coated ER to Golgi transport vesicle	3	14	0.214286	0.877182	0.234353	1	1	A0A0D1DU98_USTMA	A0A0D1DTY6_USTMA	A0A0D1CJE8_USTMA
cellular_component	GO:0005876	spindle microtubule	3	6	0.5	0.980792	0.0883975	1	1	STU1_USTMA	A0A0D1DX71_USTMA	A0A0D1DQH0_USTMA
cellular_component	GO:0043332	mating projection tip	3	8	0.375	0.868981	0.344781	1	1	A0A0D1CTU4_USTMA	A0A0D1DUD4_USTMA	A0A0D1BZG9_USTMA
molecular_function	GO:0043138	3'-5' DNA helicase activity	3	9	0.333333	0.862403	0.355654	1	1	A0A0D1CX99_USTMA	A0A0D1E7Z9_USTMA	A0A0D1CQL4_USTMA
biological_process	GO:0016075	rRNA catabolic process	3	8	0.375	0.540024	0.703769	1	1	A0A0D1CXS6_USTMA	A0A0D1E248_USTMA	A0A0D1C4N8_USTMA
molecular_function	GO:0030145	manganese ion binding	3	8	0.375	0.906844	0.282968	1	1	A0A0D1BXI7_USTMA	A0A0D1CXH6_USTMA	A0A0D1CH16_USTMA
molecular_function	GO:0030246	carbohydrate binding	3	11	0.272727	0.717939	0.461165	1	1	A0A0D1DVS1_USTMA	A0A0D1CBM5_USTMA	A0A0D1DU09_USTMA
molecular_function	GO:0004252	serine-type endopeptidase activity	3	15	0.2	0.518355	0.719624	1	1	A0A0D1E3F9_USTMA	A0A0D1CH35_USTMA	A0A0D1DVZ7_USTMA
molecular_function	GO:0008422	beta-glucosidase activity	3	13	0.230769	0.88419	0.262966	1	1	A0A0D1CHC4_USTMA	A0A0D1CX38_USTMA	A0A0D1DTR4_USTMA
cellular_component	GO:0000795	synaptonemal complex	3	4	0.75	0.997191	0.0404434	1	0.999	A0A0D1E8E3_USTMA	A0A0D1CF39_USTMA	A0A0D1CRL6_USTMA
biological_process	GO:1990414	replication-born double-strand break repair via sister chromatid exchange	3	3	1	1	0.0146138	1	0.999	A0A0D1E8E3_USTMA	A0A0D1CRL6_USTMA	A0A0D1DWG5_USTMA
biological_process	GO:0030154	cell differentiation	3	3	1	0.928191	0.211608	1	1	A0A0D1D013_USTMA	A0A0D1DSZ0_USTMA	A0A0D1BUZ6_USTMA
biological_process	GO:0000712	resolution of meiotic recombination intermediates	3	8	0.375	0.893637	0.308178	1	1	A0A0D1CF39_USTMA	A0A0D1E1Y0_USTMA	A0A0D1CUQ8_USTMA
biological_process	GO:0034427	nuclear-transcribed mRNA catabolic process, exonucleolytic, 3'-5'	3	10	0.3	0.894042	0.27198	1	1	A0A0D1ECR1_USTMA	A0A0D1E248_USTMA	A0A0D1C4N8_USTMA
cellular_component	GO:0005763	mitochondrial small ribosomal subunit	3	18	0.166667	0.37585	0.820569	1	1	A0A0D1DXU6_USTMA	A0A0D1DNQ3_USTMA	A0A0D1E593_USTMA
molecular_function	GO:0061608	nuclear import signal receptor activity	3	5	0.6	0.987785	0.087634	1	1	A0A0D1CIG6_USTMA	A0A0D1CKD6_USTMA	A0A0D1DY50_USTMA
biological_process	GO:0032956	regulation of actin cytoskeleton organization	3	11	0.272727	0.193173	0.907714	1	1	A0A0D1DZS5_USTMA	A0A0D1CIW0_USTMA	A0A0D1E6N8_USTMA
biological_process	GO:0031146	SCF-dependent proteasomal ubiquitin-dependent protein catabolic process	3	11	0.272727	0.72802	0.528427	1	1	A0A0D1C1Y1_USTMA	A0A0D1DYI6_USTMA	A0A0D1ED76_USTMA
molecular_function	GO:0004190	aspartic-type endopeptidase activity	3	11	0.272727	0.696602	0.559835	1	1	A0A0D1E099_USTMA	A0A0D1CSK7_USTMA	A0A0D1CUM7_USTMA
molecular_function	GO:0004499	N,N-dimethylaniline monooxygenase activity	3	7	0.428571	0.9431	0.211789	1	1	A0A0D1EDM2_USTMA	A0A0D1CSX2_USTMA	A0A0D1DXI8_USTMA
biological_process	GO:0006268	DNA unwinding involved in DNA replication	3	8	0.375	0.893637	0.308178	1	1	A0A0D1E418_USTMA	A0A0D1CQL4_USTMA	A0A0D1CUI6_USTMA
cellular_component	GO:0033588	elongator holoenzyme complex	3	7	0.428571	0.946197	0.204103	1	1	A0A0D1BUB7_USTMA	A0A0D1DRG9_USTMA	A0A0D1CXX4_USTMA
biological_process	GO:0006271	DNA strand elongation involved in DNA replication	3	7	0.428571	0.539762	0.676448	1	1	A0A0D1E418_USTMA	A0A0D1DX67_USTMA	A0A0D1CJS2_USTMA
cellular_component	GO:0015935	small ribosomal subunit	3	11	0.272727	0.0281537	0.989275	0.891	1	A0A0D1CE85_USTMA	A0A0D1E9T3_USTMA	A0A0D1E593_USTMA
cellular_component	GO:0000172	ribonuclease MRP complex	3	5	0.6	0.988535	0.0839104	1	1	A0A0D1DXZ8_USTMA	A0A0D1E6M7_USTMA	A0A0D1E280_USTMA
biological_process	GO:0030010	establishment of cell polarity	3	6	0.5	0.982396	0.0718089	1	1	A0A0D1CTU4_USTMA	A0A0D1E8D6_USTMA	A0A0D1E0F1_USTMA
cellular_component	GO:0071627	integral component of fungal-type vacuolar membrane	3	9	0.333333	0.868981	0.344781	1	1	A0A0D1CEU8_USTMA	A0A0D1E3I5_USTMA	A0A0D1CF73_USTMA
biological_process	GO:0006401	RNA catabolic process	3	9	0.333333	0.98392	0.029379	1	1	A0A0D1DX75_USTMA	A0A0D1CV54_USTMA	A0A0D1D0I7_USTMA
cellular_component	GO:0031305	integral component of mitochondrial inner membrane	3	19	0.157895	0.360313	0.811998	1	1	A0A0D1E292_USTMA	A0A0D1E6E5_USTMA	A0A0D1CMC7_USTMA
biological_process	GO:0032508	DNA duplex unwinding	3	7	0.428571	0.927066	0.192516	1	1	A0A0D1DZD7_USTMA	A0A0D1CDD4_USTMA	A0A0D1CQL4_USTMA
molecular_function	GO:0016208	AMP binding	3	5	0.6	0.987785	0.087634	1	1	A0A0D1E669_USTMA	A0A0D1DZW1_USTMA	A0A0D1CXM3_USTMA
cellular_component	GO:0016593	Cdc73/Paf1 complex	3	5	0.6	0.988535	0.0839104	1	1	A0A0D1DP85_USTMA	A0A0D1CIH0_USTMA	A0A0D1DPQ2_USTMA
molecular_function	GO:0031625	ubiquitin protein ligase binding	3	14	0.214286	0.576669	0.672028	1	1	A0A0D1EDM6_USTMA	A0A0D1DVA8_USTMA	A0A0D1C1Y1_USTMA
biological_process	GO:0016311	dephosphorylation	3	9	0.333333	0.777038	0.329497	1	1	A0A0D1CT47_USTMA	A0A0D1CT81_USTMA	A0A0D1E0C2_USTMA
biological_process	GO:0007095	mitotic G2 DNA damage checkpoint signaling	3	3	1	1	0.0146138	1	0.999	A0A0D1BXI7_USTMA	A0A0D1CFS9_USTMA	A0A0D1CDD4_USTMA
biological_process	GO:0007062	sister chromatid cohesion	3	6	0.5	0.999004	0.00449761	1	0.91	A0A0D1C4U8_USTMA	A0A0D1CNT9_USTMA	A0A0D1DZS4_USTMA
biological_process	GO:0043248	proteasome assembly	3	9	0.333333	0.540024	0.703769	1	1	A0A0D1CXN0_USTMA	A0A0D1DZ94_USTMA	A0A0D1CAD8_USTMA
biological_process	GO:0033314	mitotic DNA replication checkpoint signaling	3	7	0.428571	0.934423	0.232498	1	1	A0A0D1CFS9_USTMA	A0A0D1C7N3_USTMA	A0A0D1DS61_USTMA
biological_process	GO:0051123	RNA polymerase II preinitiation complex assembly	3	8	0.375	0.649405	0.576012	1	1	A0A0D1DQ53_USTMA	A0A0D1E907_USTMA	A0A0D1CD17_USTMA
biological_process	GO:0006513	protein monoubiquitination	3	6	0.5	0.975208	0.106363	1	1	A0A0D1DZT1_USTMA	A0A0D1DUE5_USTMA	A0A0D1DYQ5_USTMA
biological_process	GO:0007010	cytoskeleton organization	3	4	0.75	0.914593	0.122767	1	1	A0A0D1E474_USTMA	A0A0D1EBL3_USTMA	A0A0D1E1L9_USTMA
biological_process	GO:0000290	deadenylation-dependent decapping of nuclear-transcribed mRNA	3	5	0.6	0.985645	0.0978533	1	1	A0A0D1DW69_USTMA	A0A0D1CXH6_USTMA	A0A0D1E4L2_USTMA
cellular_component	GO:0005816	spindle pole body	3	6	0.5	0.94949	0.125491	1	1	A0A0D1DUD4_USTMA	A0A0D1CA73_USTMA	A0A0D1DVE7_USTMA
molecular_function	GO:0008235	metalloexopeptidase activity	3	6	0.5	0.361047	0.83033	1	1	A0A0D1CFS0_USTMA	A0A0D1E8W7_USTMA	A0A0D1E195_USTMA
biological_process	GO:0048015	phosphatidylinositol-mediated signaling	3	5	0.6	0.995841	0.0347463	1	1	A0A0D1CR16_USTMA	A0A0D1E9M7_USTMA	A0A0D1DX37_USTMA
biological_process	GO:1990961	xenobiotic detoxification by transmembrane export across the plasma membrane	3	23	0.130435	0.149024	0.945448	1	1	A0A0D1D1M0_USTMA	A0A0D1BUY3_USTMA	A0A0D1DZE3_USTMA
molecular_function	GO:0005543	phospholipid binding	3	7	0.428571	0.99858	0.00368923	1	0.645	A0A0D1DY37_USTMA	A0A0D1EBL3_USTMA	A0A0D1EAJ2_USTMA
molecular_function	GO:0005516	calmodulin binding	3	6	0.5	0.97014	0.145408	1	1	A0A0D1E0F2_USTMA	A0A0D1DTH1_USTMA	A0A0D1CIW0_USTMA
biological_process	GO:0045842	positive regulation of mitotic metaphase/anaphase transition	3	8	0.375	0.893637	0.308178	1	1	A0A0D1E114_USTMA	A0A0D1CMY2_USTMA	A0A0D1DSX4_USTMA
biological_process	GO:0007091	metaphase/anaphase transition of mitotic cell cycle	3	4	0.75	0.83986	0.312039	1	1	A0A0D1E114_USTMA	A0A0D1CMY2_USTMA	A0A0D1CTU9_USTMA
biological_process	GO:0046777	protein autophosphorylation	3	6	0.5	0.965254	0.16096	1	1	A0A0D1CRA9_USTMA	A0A0D1CPY9_USTMA	A0A0D1DTH1_USTMA
cellular_component	GO:0012507	ER to Golgi transport vesicle membrane	3	6	0.5	0.962476	0.119764	1	1	A0A0D1DR17_USTMA	A0A0D1C041_USTMA	A0A0D1C766_USTMA
biological_process	GO:0016560	protein import into peroxisome matrix, docking	3	6	0.5	0.965254	0.16096	1	1	A0A0D1E6M2_USTMA	A0A0D1E5X2_USTMA	A0A0D1C6B6_USTMA
cellular_component	GO:0031588	nucleotide-activated protein kinase complex	3	3	1	1	0.012218	1	0.938	A0A0D1E669_USTMA	A0A0D1EAH3_USTMA	A0A0D1CXM3_USTMA
biological_process	GO:0045732	positive regulation of protein catabolic process	3	4	0.75	0.893637	0.308178	1	1	A0A0D1EDL2_USTMA	A0A0D1DVT1_USTMA	A0A0D1DXK6_USTMA
biological_process	GO:0030950	establishment or maintenance of actin cytoskeleton polarity	3	3	1	1	0.0146138	1	0.999	A0A0D1E6A7_USTMA	A0A0D1BZG9_USTMA	A0A0D1E5Y7_USTMA
molecular_function	GO:0004104	cholinesterase activity	3	3	1	1	0.0128492	1	0.989	A0A0D1DTW1_USTMA	A0A0D1C5D2_USTMA	A0A0D1BV83_USTMA
cellular_component	GO:0016604	nuclear body	3	4	0.75	0.914503	0.234386	1	1	A0A0D1DZJ5_USTMA	A0A0D1DXU8_USTMA	A0A0D1CUQ8_USTMA
cellular_component	GO:0019005	SCF ubiquitin ligase complex	3	10	0.3	0.649479	0.60588	1	1	A0A0D1C1Y1_USTMA	A0A0D1DYI6_USTMA	A0A0D1ED76_USTMA
molecular_function	GO:0004652	polynucleotide adenylyltransferase activity	3	3	1	0.996995	0.0423828	1	1	A0A0D1DTK8_USTMA	A0A0D1EA53_USTMA	A0A0D1BUW4_USTMA
molecular_function	GO:0008047	enzyme activator activity	3	5	0.6	0.999215	0.00160141	1	0.28	A0A0D1DWR8_USTMA	A0A0D1DRM9_USTMA	A0A0D1C325_USTMA
biological_process	GO:0006900	vesicle budding from membrane	3	5	0.6	0.928423	0.175417	1	1	A0A0D1CI88_USTMA	A0A0D1DZX0_USTMA	A0A0D1E2P1_USTMA
cellular_component	GO:0016586	RSC-type complex	3	4	0.75	0.997191	0.0404434	1	0.999	A0A0D1CI18_USTMA	A0A0D1BW50_USTMA	A0A0D1E243_USTMA
molecular_function	GO:0005546	phosphatidylinositol-4,5-bisphosphate binding	3	3	1	1	0.0128492	1	0.989	A0A0D1E5C3_USTMA	A0A0D1E2P1_USTMA	A0A0D1E5Y7_USTMA
biological_process	GO:0003374	dynamin family protein polymerization involved in mitochondrial fission	3	3	1	1	0.0146138	1	0.999	A0A0D1C5I7_USTMA	A0A0D1CRQ3_USTMA	A0A0D1DPL8_USTMA
biological_process	GO:0051382	kinetochore assembly	2	7	0.285714	0.767502	0.541888	1	1	YU309_USTMA	A0A0D1DVB6_USTMA
molecular_function	GO:0003755	peptidyl-prolyl cis-trans isomerase activity	2	17	0.117647	0.201566	0.934219	1	1	PPIL2_USTMA	PPIL4_USTMA
biological_process	GO:0007052	mitotic spindle organization	2	10	0.2	0.589204	0.611626	1	1	A0A0D1CA73_USTMA	A0A0D1E206_USTMA
biological_process	GO:0006312	mitotic recombination	2	4	0.5	0.471573	0.792122	1	1	A0A0D1BZJ4_USTMA	A0A0D1E3Q0_USTMA
molecular_function	GO:0003678	DNA helicase activity	2	11	0.181818	0.966113	0.0787439	1	1	A0A0D1E418_USTMA	A0A0D1DRI5_USTMA
molecular_function	GO:0003688	DNA replication origin binding	2	17	0.117647	0.201566	0.934219	1	1	A0A0D1E418_USTMA	A0A0D1E0X0_USTMA
biological_process	GO:0044396	actin cortical patch organization	2	7	0.285714	0.844312	0.384423	1	1	SLA1_USTMA	A0A0D1DTJ9_USTMA
cellular_component	GO:0005774	vacuolar membrane	2	14	0.142857	0.614723	0.492466	1	1	A0A0D1E2D4_USTMA	A0A0D1E381_USTMA
cellular_component	GO:0030896	checkpoint clamp complex	2	3	0.666667	0.987782	0.134836	1	1	A0A0D1DS61_USTMA	A0A0D1C0S5_USTMA
cellular_component	GO:0000974	Prp19 complex	2	12	0.166667	0.453049	0.802394	1	1	CWC2_USTMA	A0A0D1E876_USTMA
cellular_component	GO:0071006	U2-type catalytic step 1 spliceosome	2	4	0.5	0.959557	0.229229	1	1	CWC2_USTMA	A0A0D1E876_USTMA
molecular_function	GO:0017070	U6 snRNA binding	2	4	0.5	0.957617	0.235642	1	1	CWC2_USTMA	A0A0D1CHJ8_USTMA
cellular_component	GO:0030127	COPII vesicle coat	2	6	0.333333	0.860311	0.419317	1	1	SEC13_USTMA	SEC23_USTMA
molecular_function	GO:0016874	ligase activity	2	6	0.333333	0.627254	0.455805	1	1	SID2_USTMA	A0A0D1DUH7_USTMA
biological_process	GO:0043041	amino acid activation for nonribosomal peptide biosynthetic process	2	3	0.666667	0.985386	0.150242	1	1	SID2_USTMA	A0A0D1DUH7_USTMA
biological_process	GO:0031169	ferrichrome biosynthetic process	2	3	0.666667	0.985386	0.150242	1	1	SID2_USTMA	SIDA_USTMA
molecular_function	GO:0034450	ubiquitin-ubiquitin ligase activity	2	2	1	1	0.0549036	1	1	PPIL2_USTMA	A0A0D1BZS3_USTMA
cellular_component	GO:0070971	endoplasmic reticulum exit site	2	6	0.333333	0.860311	0.419317	1	1	SEC23_USTMA	A0A0D1C766_USTMA
biological_process	GO:0007029	endoplasmic reticulum organization	2	3	0.666667	0.873451	0.264071	1	1	A0A0D1DU98_USTMA	A0A0D1C766_USTMA
molecular_function	GO:0017116	single-stranded DNA helicase activity	2	5	0.4	0.912366	0.334314	1	1	A0A0D1DTM4_USTMA	A0A0D1C325_USTMA
biological_process	GO:0042138	meiotic DNA double-strand break formation	2	3	0.666667	0.952246	0.25273	1	1	A0A0D1BXI7_USTMA	A0A0D1CM04_USTMA
biological_process	GO:0006366	transcription by RNA polymerase II	2	17	0.117647	0.992744	0.0109275	1	0.985	A0A0D1DNQ9_USTMA	A0A0D1E9Y8_USTMA
biological_process	GO:0002098	tRNA wobble uridine modification	2	12	0.166667	0.539762	0.676448	1	1	A0A0D1BUB7_USTMA	A0A0D1DRG9_USTMA
molecular_function	GO:0008175	tRNA methyltransferase activity	2	2	1	0.636503	0.618736	1	1	TRM5_USTMA	A0A0D1CBR1_USTMA
biological_process	GO:0006207	'de novo' pyrimidine nucleobase biosynthetic process	2	7	0.285714	0.767502	0.541888	1	1	A0A0D1E223_USTMA	A0A0D1DTC4_USTMA
biological_process	GO:0017148	negative regulation of translation	2	6	0.333333	0.93081	0.136065	1	1	A0A0D1DQ67_USTMA	A0A0D1DQF4_USTMA
cellular_component	GO:0031298	replication fork protection complex	2	4	0.5	0.959557	0.229229	1	1	TOF1_USTMA	A0A0D1E0X0_USTMA
biological_process	GO:0000076	DNA replication checkpoint signaling	2	3	0.666667	0.982396	0.0718089	1	1	TOF1_USTMA	A0A0D1C0S5_USTMA
biological_process	GO:0048478	replication fork protection	2	2	1	1	0.0598232	1	1	TOF1_USTMA	A0A0D1C7N3_USTMA
molecular_function	GO:0030515	snoRNA binding	2	9	0.222222	0.832698	0.320395	1	1	UTP10_USTMA	A0A0D1CY14_USTMA
molecular_function	GO:0008198	ferrous iron binding	2	6	0.333333	0.854592	0.428768	1	1	A0A0D1CZM5_USTMA	A0A0D1CKH5_USTMA
molecular_function	GO:0004519	endonuclease activity	2	19	0.105263	0.285253	0.814884	1	1	IEND1_USTMA	A0A0D1E1Y0_USTMA
biological_process	GO:0044805	late nucleophagy	2	5	0.4	0.902147	0.355981	1	1	ATG2_USTMA	A0A0D1DPG6_USTMA
biological_process	GO:0042594	response to starvation	2	3	0.666667	0.335285	0.806827	1	1	A0A0D1DPG6_USTMA	A0A0D1CPQ2_USTMA
biological_process	GO:0006898	receptor-mediated endocytosis	2	3	0.666667	0.893637	0.308178	1	1	A0A0D1DZ93_USTMA	A0A0D1CEI5_USTMA
molecular_function	GO:0008186	ATP-dependent activity, acting on RNA	2	4	0.5	0.957617	0.235642	1	1	DBP4_USTMA	RRP3_USTMA
biological_process	GO:0006526	arginine biosynthetic process	2	6	0.333333	0.691822	0.619791	1	1	A0A0D1E223_USTMA	A0A0D1DTC4_USTMA
molecular_function	GO:0003774	cytoskeletal motor activity	2	2	1	0.999667	0.00180375	1	0.313	CHS8_USTMA	A0A0D1DWW8_USTMA
cellular_component	GO:0005684	U2-type spliceosomal complex	2	10	0.2	0.170202	0.920314	1	1	A0A0D1C357_USTMA	A0A0D1CFZ9_USTMA
biological_process	GO:0006031	chitin biosynthetic process	2	4	0.5	0.767502	0.541888	1	1	CHS1_USTMA	CHS3_USTMA
cellular_component	GO:0031307	integral component of mitochondrial outer membrane	2	10	0.2	0.584704	0.709514	1	1	MDM34_USTMA	A0A0D1DPI1_USTMA
biological_process	GO:0016559	peroxisome fission	2	6	0.333333	0.83904	0.453491	1	1	A0A0D1CRQ3_USTMA	A0A0D1DPL8_USTMA
biological_process	GO:0042254	ribosome biogenesis	2	9	0.222222	0.00190434	0.998947	0.311	1	A0A0D1DXM4_USTMA	A0A0D1CPZ3_USTMA
cellular_component	GO:0097361	CIA complex	2	3	0.666667	0.987782	0.134836	1	1	NAR1_USTMA	A0A0D1C4H8_USTMA
biological_process	GO:0006334	nucleosome assembly	2	8	0.25	0.348472	0.86475	1	1	A0A0D1CTS1_USTMA	A0A0D1CUH3_USTMA
cellular_component	GO:0005835	fatty acid synthase complex	2	2	1	1	0.0530907	1	1	FAS2_USTMA	A0A0D1C5S0_USTMA
molecular_function	GO:0004317	3-hydroxypalmitoyl-[acyl-carrier-protein] dehydratase activity	2	2	1	1	0.0549036	1	1	FAS2_USTMA	A0A0D1C5S0_USTMA
molecular_function	GO:0004318	enoyl-[acyl-carrier-protein] reductase (NADH) activity	2	2	1	1	0.0549036	1	1	FAS2_USTMA	A0A0D1C5S0_USTMA
molecular_function	GO:0008897	holo-[acyl-carrier-protein] synthase activity	2	4	0.5	0.957617	0.235642	1	1	FAS2_USTMA	A0A0D1C5S0_USTMA
biological_process	GO:0042759	long-chain fatty acid biosynthetic process	2	3	0.666667	0.985386	0.150242	1	1	FAS2_USTMA	A0A0D1C5S0_USTMA
biological_process	GO:0000466	maturation of 5.8S rRNA from tricistronic rRNA transcript (SSU-rRNA, 5.8S rRNA, LSU-rRNA)	2	6	0.333333	0.105841	0.964015	1	1	ERB1_USTMA	A0A0D1E1Q9_USTMA
molecular_function	GO:0003743	translation initiation factor activity	2	37	0.0540541	0.00370092	0.999395	0.34	1	EIF3L_USTMA	A0A0D1DU52_USTMA
biological_process	GO:0008299	isoprenoid biosynthetic process	2	6	0.333333	0.371599	0.824508	1	1	A0A0D1E292_USTMA	A0A0D1E3E8_USTMA
molecular_function	GO:0004300	enoyl-CoA hydratase activity	2	7	0.285714	0.788211	0.515559	1	1	FER4_USTMA	A0A0D1E0P3_USTMA
molecular_function	GO:0008810	cellulase activity	2	4	0.5	0.957617	0.235642	1	1	A0A0D1CIF7_USTMA	A0A0D1EAF6_USTMA
biological_process	GO:0030245	cellulose catabolic process	2	4	0.5	0.952246	0.25273	1	1	A0A0D1CIF7_USTMA	A0A0D1EAF6_USTMA
molecular_function	GO:0051731	polynucleotide 5'-hydroxyl-kinase activity	2	2	1	0.987151	0.139013	1	1	CLP1_USTMA	A0A0D1CIK4_USTMA
biological_process	GO:0006396	RNA processing	2	9	0.222222	0.00354473	0.997638	0.507	1	CLP1_USTMA	A0A0D1CIK4_USTMA
biological_process	GO:0034497	protein localization to phagophore assembly site	2	6	0.333333	0.83904	0.453491	1	1	A0A0D1DRV9_USTMA	A0A0D1CUV6_USTMA
biological_process	GO:0045292	mRNA cis splicing, via spliceosome	2	10	0.2	0.471573	0.792122	1	1	CWC2_USTMA	A0A0D1DTA6_USTMA
molecular_function	GO:0015297	antiporter activity	2	9	0.222222	0.109146	0.962443	1	1	A0A0D1DYS1_USTMA	A0A0D1CHT8_USTMA
cellular_component	GO:0030688	preribosome, small subunit precursor	2	11	0.181818	0.39412	0.838123	1	1	A0A0D1DS67_USTMA	A0A0D1DST4_USTMA
cellular_component	GO:0000922	spindle pole	2	9	0.222222	0.819755	0.415296	1	1	A0A0D1BZI3_USTMA	A0A0D1CA73_USTMA
molecular_function	GO:0005459	UDP-galactose transmembrane transporter activity	2	4	0.5	0.957617	0.235642	1	1	HUT1_USTMA	A0A0D1DRN0_USTMA
cellular_component	GO:0032865	ERMES complex	2	4	0.5	0.959557	0.229229	1	1	MDM34_USTMA	MDM12_USTMA
biological_process	GO:0007005	mitochondrion organization	2	10	0.2	0.0400752	0.976019	0.999	1	MDM34_USTMA	A0A0D1C6E5_USTMA
biological_process	GO:1990456	mitochondrion-endoplasmic reticulum membrane tethering	2	4	0.5	0.952246	0.25273	1	1	MDM34_USTMA	MDM12_USTMA
biological_process	GO:0019878	lysine biosynthetic process via aminoadipic acid	2	6	0.333333	0.83904	0.453491	1	1	A0A0D1BVQ6_USTMA	A0A0D1CBC4_USTMA
biological_process	GO:0010468	regulation of gene expression	2	9	0.222222	0.998241	0.00255537	1	0.66	A0A0D1DWG5_USTMA	A0A0D1BVP4_USTMA
molecular_function	GO:0080025	phosphatidylinositol-3,5-bisphosphate binding	2	4	0.5	0.957617	0.235642	1	1	A0A0D1DRV9_USTMA	A0A0D1C5I7_USTMA
molecular_function	GO:0016709	oxidoreductase activity, acting on paired donors, with incorporation or reduction of molecular oxygen, NAD(P)H as one donor, and incorporation of one atom of oxygen	2	4	0.5	0.796861	0.367297	1	1	A0A0D1CA24_USTMA	A0A0D1E1J4_USTMA
cellular_component	GO:0031965	nuclear membrane	2	8	0.25	0.649479	0.60588	1	1	A0A0D1EDM6_USTMA	A0A0D1DS72_USTMA
cellular_component	GO:0034399	nuclear periphery	2	12	0.166667	0.34053	0.867899	1	1	A0A0D1DT43_USTMA	A0A0D1DSX4_USTMA
biological_process	GO:0000460	maturation of 5.8S rRNA	2	8	0.25	0.168416	0.921812	1	1	A0A0D1CG36_USTMA	A0A0D1CV54_USTMA
biological_process	GO:0000470	maturation of LSU-rRNA	2	14	0.142857	0.540635	0.640411	1	1	A0A0D1CG36_USTMA	A0A0D1E362_USTMA
biological_process	GO:0030490	maturation of SSU-rRNA	2	13	0.153846	0.11891	0.939082	1	1	A0A0D1DST4_USTMA	A0A0D1CY14_USTMA
molecular_function	GO:0051787	misfolded protein binding	2	8	0.25	0.717032	0.59309	1	1	A0A0D1DT43_USTMA	A0A0D1E2P6_USTMA
biological_process	GO:0006612	protein targeting to membrane	2	10	0.2	0.28432	0.851411	1	1	A0A0D1E641_USTMA	A0A0D1DSD4_USTMA
biological_process	GO:0043328	protein transport to vacuole involved in ubiquitin-dependent protein catabolic process via the multivesicular body sorting pathway	2	12	0.166667	0.407001	0.831947	1	1	A0A0D1CI88_USTMA	A0A0D1E936_USTMA
cellular_component	GO:0017053	transcription repressor complex	2	6	0.333333	0.726473	0.582695	1	1	A0A0D1DR64_USTMA	A0A0D1CDB5_USTMA
molecular_function	GO:0008168	methyltransferase activity	2	19	0.105263	0.127682	0.918023	1	1	A0A0D1DZK7_USTMA	A0A0D1DTF0_USTMA
biological_process	GO:0000027	ribosomal large subunit assembly	2	17	0.117647	0.175492	0.945239	1	1	A0A0D1BY56_USTMA	A0A0D1C4F4_USTMA
cellular_component	GO:0070209	ASTRA complex	2	4	0.5	0.959557	0.229229	1	1	A0A0D1DYU5_USTMA	A0A0D1DYY3_USTMA
molecular_function	GO:0043139	5'-3' DNA helicase activity	2	5	0.4	0.912366	0.334314	1	1	A0A0D1DZD7_USTMA	A0A0D1E617_USTMA
biological_process	GO:0031123	RNA 3'-end processing	2	4	0.5	0.612522	0.525603	1	1	A0A0D1DTK8_USTMA	A0A0D1EA53_USTMA
biological_process	GO:0006895	Golgi to endosome transport	2	8	0.25	0.691822	0.619791	1	1	A0A0D1DZ93_USTMA	A0A0D1DV89_USTMA
biological_process	GO:0001510	RNA methylation	2	7	0.285714	0.25104	0.872755	1	1	A0A0D1DZK7_USTMA	A0A0D1CBR1_USTMA
biological_process	GO:0032456	endocytic recycling	2	5	0.4	0.767502	0.541888	1	1	SNX3_USTMA	A0A0D1DU73_USTMA
biological_process	GO:0070816	phosphorylation of RNA polymerase II C-terminal domain	2	11	0.181818	0.807484	0.397905	1	1	A0A0D1E4P9_USTMA	A0A0D1CUI2_USTMA
cellular_component	GO:1990023	mitotic spindle midzone	2	6	0.333333	0.860311	0.419317	1	1	STU1_USTMA	A0A0D1E377_USTMA
biological_process	GO:0090307	mitotic spindle assembly	2	6	0.333333	0.893637	0.308178	1	1	STU1_USTMA	A0A0D1DQH0_USTMA
biological_process	GO:0006508	proteolysis	2	13	0.153846	0.724467	0.329849	1	1	A0A0D1E8W7_USTMA	A0A0D1DQ65_USTMA
biological_process	GO:0008608	attachment of spindle microtubules to kinetochore	2	7	0.285714	0.704148	0.519658	1	1	A0A0D1DX71_USTMA	A0A0D1E553_USTMA
cellular_component	GO:0005762	mitochondrial large ribosomal subunit	2	29	0.0689655	0.0227647	0.99525	0.818	1	A0A0D1E3V3_USTMA	A0A0D1DZK4_USTMA
molecular_function	GO:0005094	Rho GDP-dissociation inhibitor activity	2	3	0.666667	0.987151	0.139013	1	1	A0A0D1BV57_USTMA	A0A0D1BUD7_USTMA
cellular_component	GO:0000445	THO complex part of transcription export complex	2	4	0.5	0.959557	0.229229	1	1	A0A0D1BY90_USTMA	A0A0D1DT20_USTMA
biological_process	GO:0000288	nuclear-transcribed mRNA catabolic process, deadenylation-dependent decay	2	5	0.4	0.964915	0.0854232	1	1	A0A0D1DQ67_USTMA	A0A0D1EBV9_USTMA
biological_process	GO:0006749	glutathione metabolic process	2	19	0.105263	0.0886894	0.97089	1	1	A0A0D1DZ67_USTMA	A0A0D1E6W1_USTMA
biological_process	GO:0031122	cytoplasmic microtubule organization	2	10	0.2	0.541513	0.744177	1	1	A0A0D1BZI3_USTMA	A0A0D1DVE7_USTMA
molecular_function	GO:0051087	chaperone binding	2	16	0.125	0.238339	0.918245	1	1	A0A0D1DT43_USTMA	A0A0D1E2P6_USTMA
biological_process	GO:0006073	cellular glucan metabolic process	2	8	0.25	0.760353	0.378953	1	1	A0A0D1CHC4_USTMA	A0A0D1CX38_USTMA
molecular_function	GO:0000400	four-way junction DNA binding	2	2	1	1	0.0549036	1	1	A0A0D1CX99_USTMA	A0A0D1CQ83_USTMA
molecular_function	GO:0009378	four-way junction helicase activity	2	5	0.4	0.912366	0.334314	1	1	A0A0D1CX99_USTMA	A0A0D1CQL4_USTMA
biological_process	GO:0071932	replication fork reversal	2	2	1	1	0.0598232	1	1	A0A0D1CX99_USTMA	A0A0D1DTM4_USTMA
biological_process	GO:0046512	sphingosine biosynthetic process	2	5	0.4	0.902147	0.355981	1	1	A0A0D1DXU0_USTMA	A0A0D1DN85_USTMA
molecular_function	GO:0000293	ferric-chelate reductase activity	2	8	0.25	0.717032	0.59309	1	1	A0A0D1E0K7_USTMA	A0A0D1E5G0_USTMA
molecular_function	GO:0005216	ion channel activity	2	5	0.4	0.928531	0.143397	1	1	A0A0D1DRC6_USTMA	A0A0D1DV72_USTMA
cellular_component	GO:0034991	nuclear meiotic cohesin complex	2	2	1	1	0.0530907	1	1	A0A0D1E8E3_USTMA	A0A0D1CRL6_USTMA
cellular_component	GO:0034990	nuclear mitotic cohesin complex	2	2	1	1	0.0530907	1	1	A0A0D1E8E3_USTMA	A0A0D1CRL6_USTMA
biological_process	GO:0051177	meiotic sister chromatid cohesion	2	2	1	0.985386	0.150242	1	1	A0A0D1E8E3_USTMA	A0A0D1DYL5_USTMA
biological_process	GO:0007130	synaptonemal complex assembly	2	3	0.666667	0.985386	0.150242	1	1	A0A0D1E8E3_USTMA	A0A0D1CRL6_USTMA
biological_process	GO:0006144	purine nucleobase metabolic process	2	5	0.4	0.210099	0.931035	1	1	A0A0D1E3U9_USTMA	A0A0D1EDZ5_USTMA
biological_process	GO:2000815	regulation of mRNA stability involved in response to oxidative stress	2	3	0.666667	0.985386	0.150242	1	1	A0A0D1DZT6_USTMA	A0A0D1C6D7_USTMA
molecular_function	GO:0008080	N-acetyltransferase activity	2	14	0.142857	0.0317622	0.991198	0.991	1	A0A0D1BZ11_USTMA	A0A0D1DRW1_USTMA
cellular_component	GO:0000177	cytoplasmic exosome (RNase complex)	2	9	0.222222	0.819755	0.415296	1	1	A0A0D1E248_USTMA	A0A0D1C4N8_USTMA
cellular_component	GO:0000176	nuclear exosome (RNase complex)	2	11	0.181818	0.516862	0.75982	1	1	A0A0D1E248_USTMA	A0A0D1C4N8_USTMA
biological_process	GO:0034475	U4 snRNA 3'-end processing	2	9	0.222222	0.615577	0.687039	1	1	A0A0D1E248_USTMA	A0A0D1C4N8_USTMA
molecular_function	GO:0016765	transferase activity, transferring alkyl or aryl (other than methyl) groups	2	5	0.4	0.103619	0.955878	1	1	A0A0D1E292_USTMA	A0A0D1CCL3_USTMA
biological_process	GO:0042790	nucleolar large rRNA transcription by RNA polymerase I	2	5	0.4	0.902147	0.355981	1	1	A0A0D1E5A6_USTMA	A0A0D1C1L3_USTMA
molecular_function	GO:0070181	small ribosomal subunit rRNA binding	2	6	0.333333	0.854592	0.428768	1	1	A0A0D1EDG3_USTMA	A0A0D1DNQ3_USTMA
cellular_component	GO:0000938	GARP complex	2	4	0.5	0.959557	0.229229	1	1	A0A0D1DYZ9_USTMA	A0A0D1C9Y1_USTMA
biological_process	GO:0006869	lipid transport	2	7	0.285714	0.771778	0.374553	1	1	A0A0D1E0Y3_USTMA	A0A0D1E151_USTMA
biological_process	GO:0009306	protein secretion	2	7	0.285714	0.844312	0.384423	1	1	A0A0D1E930_USTMA	A0A0D1CEE2_USTMA
molecular_function	GO:0005049	nuclear export signal receptor activity	2	3	0.666667	0.987151	0.139013	1	1	A0A0D1E1E4_USTMA	A0A0D1DZU4_USTMA
biological_process	GO:0006611	protein export from nucleus	2	2	1	0.985386	0.150242	1	1	A0A0D1E1E4_USTMA	A0A0D1DZU4_USTMA
biological_process	GO:0006449	regulation of translational termination	2	3	0.666667	0.952246	0.25273	1	1	A0A0D1E4T3_USTMA	A0A0D1EAJ2_USTMA
biological_process	GO:0000147	actin cortical patch assembly	2	3	0.666667	0.985386	0.150242	1	1	A0A0D1DTJ9_USTMA	A0A0D1CRA9_USTMA
biological_process	GO:0034975	protein folding in endoplasmic reticulum	2	3	0.666667	0.985386	0.150242	1	1	A0A0D1DT43_USTMA	A0A0D1E2P6_USTMA
biological_process	GO:0045332	phospholipid translocation	2	6	0.333333	0.767502	0.541888	1	1	A0A0D1C917_USTMA	A0A0D1DWI0_USTMA
biological_process	GO:0044255	cellular lipid metabolic process	2	4	0.5	0.22064	0.823504	1	1	A0A0D1C7F5_USTMA	A0A0D1CL95_USTMA
cellular_component	GO:1990316	Atg1/ULK1 kinase complex	2	2	1	1	0.0530907	1	1	A0A0D1CUV6_USTMA	A0A0D1E2D4_USTMA
molecular_function	GO:0016831	carboxy-lyase activity	2	7	0.285714	0.386269	0.794302	1	1	A0A0D1CG70_USTMA	A0A0D1E5G6_USTMA
biological_process	GO:0090630	activation of GTPase activity	2	12	0.166667	0.407001	0.831947	1	1	A0A0D1E150_USTMA	A0A0D1CXE3_USTMA
molecular_function	GO:0004712	protein serine/threonine/tyrosine kinase activity	2	3	0.666667	0.97014	0.145408	1	1	A0A0D1DPJ8_USTMA	A0A0D1CL71_USTMA
biological_process	GO:0007094	mitotic spindle assembly checkpoint signaling	2	10	0.2	0.541513	0.744177	1	1	A0A0D1DPJ8_USTMA	A0A0D1DTE9_USTMA
biological_process	GO:0034501	protein localization to kinetochore	2	4	0.5	0.952246	0.25273	1	1	A0A0D1DPJ8_USTMA	A0A0D1DVB6_USTMA
molecular_function	GO:0019888	protein phosphatase regulator activity	2	7	0.285714	0.576669	0.672028	1	1	A0A0D1CQ20_USTMA	A0A0D1CI23_USTMA
molecular_function	GO:0000155	phosphorelay sensor kinase activity	2	6	0.333333	0.854592	0.428768	1	1	A0A0D1CS93_USTMA	A0A0D1CPY9_USTMA
molecular_function	GO:0000009	alpha-1,6-mannosyltransferase activity	2	3	0.666667	0.987151	0.139013	1	1	A0A0D1E064_USTMA	A0A0D1CFY9_USTMA
cellular_component	GO:0035361	Cul8-RING ubiquitin ligase complex	2	2	1	1	0.0530907	1	1	A0A0D1CM71_USTMA	A0A0D1C943_USTMA
biological_process	GO:0072583	clathrin-dependent endocytosis	2	6	0.333333	0.83904	0.453491	1	1	A0A0D1CEI5_USTMA	A0A0D1E2P1_USTMA
molecular_function	GO:0019887	protein kinase regulator activity	2	5	0.4	0.911723	0.169644	1	1	A0A0D1E669_USTMA	A0A0D1CXM3_USTMA
molecular_function	GO:0008199	ferric iron binding	2	3	0.666667	0.987151	0.139013	1	1	A0A0D1CKH5_USTMA	A0A0D1DTK7_USTMA
cellular_component	GO:0005788	endoplasmic reticulum lumen	2	5	0.4	0.91609	0.326108	1	1	A0A0D1CAH9_USTMA	A0A0D1CFY9_USTMA
biological_process	GO:0000244	spliceosomal tri-snRNP complex assembly	2	3	0.666667	0.985386	0.150242	1	1	A0A0D1CY26_USTMA	A0A0D1CTB2_USTMA
molecular_function	GO:0004359	glutaminase activity	2	3	0.666667	0.987151	0.139013	1	1	A0A0D1C3H6_USTMA	A0A0D1CPD0_USTMA
biological_process	GO:0001682	tRNA 5'-leader removal	2	4	0.5	0.952246	0.25273	1	1	A0A0D1E6M7_USTMA	A0A0D1E280_USTMA
biological_process	GO:0000055	ribosomal large subunit export from nucleus	2	6	0.333333	0.83904	0.453491	1	1	A0A0D1BUR0_USTMA	A0A0D1E7Q3_USTMA
molecular_function	GO:0016301	kinase activity	2	13	0.153846	0.999968	6.19899e-05	1	0.007	A0A0D1CNX0_USTMA	A0A0D1E9A4_USTMA
biological_process	GO:0006633	fatty acid biosynthetic process	2	8	0.25	0.687961	0.513166	1	1	A0A0D1DV12_USTMA	A0A0D1CLM3_USTMA
biological_process	GO:0000001	mitochondrion inheritance	2	8	0.25	0.691822	0.619791	1	1	A0A0D1C5I7_USTMA	A0A0D1DPL8_USTMA
biological_process	GO:0017196	N-terminal peptidyl-methionine acetylation	2	5	0.4	0.902147	0.355981	1	1	A0A0D1BV65_USTMA	A0A0D1CWX3_USTMA
molecular_function	GO:0008553	P-type proton-exporting transporter activity	2	7	0.285714	0.788211	0.515559	1	1	A0A0D1DSP1_USTMA	A0A0D1E789_USTMA
biological_process	GO:0006370	7-methylguanosine mRNA capping	2	6	0.333333	0.767502	0.541888	1	1	A0A0D1DYL2_USTMA	A0A0D1DWA0_USTMA
biological_process	GO:0000070	mitotic sister chromatid segregation	2	10	0.2	0.946285	0.096307	1	1	A0A0D1DYL5_USTMA	A0A0D1DVB6_USTMA
molecular_function	GO:0061665	SUMO ligase activity	2	2	1	1	0.0549036	1	1	A0A0D1C349_USTMA	A0A0D1EDV2_USTMA
biological_process	GO:0016925	protein sumoylation	2	6	0.333333	0.83904	0.453491	1	1	A0A0D1C349_USTMA	A0A0D1EDV2_USTMA
cellular_component	GO:0000935	division septum	2	3	0.666667	0.987782	0.134836	1	1	A0A0D1CTU4_USTMA	A0A0D1DR37_USTMA
cellular_component	GO:0005665	RNA polymerase II, core complex	2	12	0.166667	0.453049	0.802394	1	1	A0A0D1C3I0_USTMA	A0A0D1CKL7_USTMA
molecular_function	GO:0001055	RNA polymerase II activity	2	5	0.4	0.912366	0.334314	1	1	A0A0D1C3I0_USTMA	A0A0D1CKL7_USTMA
molecular_function	GO:0003968	RNA-directed 5'-3' RNA polymerase activity	2	5	0.4	0.912366	0.334314	1	1	A0A0D1C3I0_USTMA	A0A0D1CKL7_USTMA
cellular_component	GO:0005935	cellular bud neck	2	5	0.4	0.860311	0.419317	1	1	A0A0D1CBV0_USTMA	A0A0D1BZG9_USTMA
biological_process	GO:0071051	polyadenylation-dependent snoRNA 3'-end processing	2	6	0.333333	0.83904	0.453491	1	1	A0A0D1E248_USTMA	A0A0D1C4N8_USTMA
biological_process	GO:0015937	coenzyme A biosynthetic process	2	4	0.5	0.952246	0.25273	1	1	A0A0D1DP09_USTMA	A0A0D1DPC6_USTMA
molecular_function	GO:0017025	TBP-class protein binding	2	11	0.181818	0.504275	0.76905	1	1	A0A0D1C1L3_USTMA	A0A0D1E907_USTMA
biological_process	GO:0000390	spliceosomal complex disassembly	2	2	1	1	0.0598232	1	1	A0A0D1DX30_USTMA	A0A0D1DZB4_USTMA
molecular_function	GO:0035312	5'-3' exodeoxyribonuclease activity	2	3	0.666667	0.97014	0.145408	1	1	A0A0D1CPS3_USTMA	A0A0D1E8P9_USTMA
cellular_component	GO:0005615	extracellular space	2	11	0.181818	0.516862	0.75982	1	1	A0A0D1CI78_USTMA	A0A0D1CQJ8_USTMA
molecular_function	GO:0004175	endopeptidase activity	2	16	0.125	0.600426	0.513795	1	1	A0A0D1CH35_USTMA	A0A0D1DNX0_USTMA
biological_process	GO:0010499	proteasomal ubiquitin-independent protein catabolic process	2	15	0.133333	0.250203	0.913393	1	1	A0A0D1CB29_USTMA	A0A0D1DNX0_USTMA
biological_process	GO:0010961	cellular magnesium ion homeostasis	2	2	1	1	0.0598232	1	1	A0A0D1E8H2_USTMA	A0A0D1E7T5_USTMA
molecular_function	GO:0008559	ABC-type xenobiotic transporter activity	2	2	1	1	0.0549036	1	1	A0A0D1E2C4_USTMA	A0A0D1BUY3_USTMA
cellular_component	GO:0005801	cis-Golgi network	2	7	0.285714	0.726473	0.582695	1	1	A0A0D1BWQ9_USTMA	A0A0D1CHT8_USTMA
molecular_function	GO:0008757	S-adenosylmethionine-dependent methyltransferase activity	2	6	0.333333	0.322697	0.775167	1	1	A0A0D1CRB1_USTMA	A0A0D1E7S0_USTMA
cellular_component	GO:0005736	RNA polymerase I complex	2	12	0.166667	0.453049	0.802394	1	1	A0A0D1E492_USTMA	A0A0D1CKL7_USTMA
biological_process	GO:0006044	N-acetylglucosamine metabolic process	2	2	1	0.952246	0.25273	1	1	A0A0D1CW17_USTMA	A0A0D1DWL6_USTMA
biological_process	GO:0008104	protein localization	2	6	0.333333	0.903292	0.120011	1	1	A0A0D1CLQ0_USTMA	A0A0D1C5J2_USTMA
cellular_component	GO:0043625	delta DNA polymerase complex	2	4	0.5	0.959557	0.229229	1	1	A0A0D1DX67_USTMA	A0A0D1CJS2_USTMA
molecular_function	GO:0003906	DNA-(apurinic or apyrimidinic site) endonuclease activity	2	4	0.5	0.912366	0.334314	1	1	A0A0D1EAB3_USTMA	A0A0D1BVK3_USTMA
molecular_function	GO:0008311	double-stranded DNA 3'-5' exodeoxyribonuclease activity	2	2	1	1	0.0549036	1	1	A0A0D1EAB3_USTMA	A0A0D1BVK3_USTMA
molecular_function	GO:0004528	phosphodiesterase I activity	2	3	0.666667	0.987151	0.139013	1	1	A0A0D1EAB3_USTMA	A0A0D1BVK3_USTMA
biological_process	GO:0006665	sphingolipid metabolic process	2	5	0.4	0.300451	0.831584	1	1	A0A0D1DN85_USTMA	A0A0D1CXV0_USTMA
cellular_component	GO:0000127	transcription factor TFIIIC complex	2	5	0.4	0.91609	0.326108	1	1	A0A0D1D079_USTMA	A0A0D1CJU8_USTMA
molecular_function	GO:0003899	DNA-directed 5'-3' RNA polymerase activity	2	17	0.117647	0.155409	0.934594	1	1	A0A0D1E254_USTMA	A0A0D1E492_USTMA
biological_process	GO:0009435	NAD biosynthetic process	2	3	0.666667	0.665292	0.592999	1	1	A0A0D1CSJ5_USTMA	A0A0D1CPD0_USTMA
molecular_function	GO:0003993	acid phosphatase activity	2	8	0.25	0.717032	0.59309	1	1	A0A0D1C553_USTMA	A0A0D1E160_USTMA
biological_process	GO:0030259	lipid glycosylation	2	2	1	1	0.0598232	1	1	A0A0D1DZT0_USTMA	A0A0D1DZW9_USTMA
biological_process	GO:0016570	histone modification	2	4	0.5	0.577846	0.545057	1	1	A0A0D1DP85_USTMA	A0A0D1CIH0_USTMA
biological_process	GO:0032981	mitochondrial respiratory chain complex I assembly	2	14	0.142857	0.296231	0.89158	1	1	A0A0D1DTF0_USTMA	A0A0D1CBQ6_USTMA
molecular_function	GO:0042781	3'-tRNA processing endoribonuclease activity	2	3	0.666667	0.987151	0.139013	1	1	A0A0D1CNX0_USTMA	A0A0D1DME6_USTMA
biological_process	GO:0032511	late endosome to vacuole transport via multivesicular body sorting pathway	2	8	0.25	0.323552	0.85412	1	1	A0A0D1CI88_USTMA	A0A0D1DZX0_USTMA
cellular_component	GO:0000118	histone deacetylase complex	2	7	0.285714	0.448422	0.748386	1	1	A0A0D1CDB5_USTMA	A0A0D1E8N3_USTMA
biological_process	GO:0006446	regulation of translational initiation	2	4	0.5	0.615577	0.687039	1	1	A0A0D1CL05_USTMA	A0A0D1EAJ2_USTMA
biological_process	GO:0046907	intracellular transport	2	4	0.5	0.769311	0.271711	1	1	A0A0D1CS07_USTMA	A0A0D1C246_USTMA
molecular_function	GO:0070403	NAD+ binding	2	9	0.222222	0.644346	0.660928	1	1	A0A0D1DTR5_USTMA	A0A0D1DSY4_USTMA
molecular_function	GO:0016773	phosphotransferase activity, alcohol group as acceptor	2	3	0.666667	0.999991	1.94831e-05	1	0.005	A0A0D1E4U1_USTMA	A0A0D1CWJ4_USTMA
cellular_component	GO:0080008	Cul4-RING E3 ubiquitin ligase complex	2	7	0.285714	0.726473	0.582695	1	1	A0A0D1D1K7_USTMA	A0A0D1C1Y1_USTMA
cellular_component	GO:0030870	Mre11 complex	2	3	0.666667	0.987782	0.134836	1	1	A0A0D1BXI7_USTMA	A0A0D1CDD4_USTMA
biological_process	GO:0016310	phosphorylation	2	7	0.285714	0.999947	0.000115905	1	0.056	A0A0D1CWJ4_USTMA	A0A0D1DN85_USTMA
molecular_function	GO:0042826	histone deacetylase binding	2	3	0.666667	0.987151	0.139013	1	1	A0A0D1BWL5_USTMA	A0A0D1CDB5_USTMA
cellular_component	GO:0031931	TORC1 complex	2	5	0.4	0.91609	0.326108	1	1	A0A0D1DZS5_USTMA	A0A0D1DYU5_USTMA
cellular_component	GO:0008278	cohesin complex	2	2	1	1	0.00280948	1	0.415	A0A0D1C4U8_USTMA	A0A0D1DZS4_USTMA
cellular_component	GO:0030427	site of polarized growth	2	3	0.666667	0.98324	0.046871	1	0.999	A0A0D1E8D6_USTMA	A0A0D1E7N8_USTMA
molecular_function	GO:0016251	RNA polymerase II general transcription initiation factor activity	2	7	0.285714	0.788211	0.515559	1	1	A0A0D1E0G9_USTMA	A0A0D1E907_USTMA
cellular_component	GO:0008541	proteasome regulatory particle, lid subcomplex	2	8	0.25	0.726473	0.582695	1	1	A0A0D1E765_USTMA	A0A0D1DZ94_USTMA
biological_process	GO:0006352	DNA-templated transcription, initiation	2	5	0.4	0.612522	0.525603	1	1	A0A0D1E7H5_USTMA	A0A0D1DNQ9_USTMA
cellular_component	GO:0005786	signal recognition particle, endoplasmic reticulum targeting	2	5	0.4	0.91609	0.326108	1	1	A0A0D1C2A1_USTMA	A0A0D1CDU8_USTMA
molecular_function	GO:0008312	7S RNA binding	2	6	0.333333	0.854592	0.428768	1	1	A0A0D1C2A1_USTMA	A0A0D1CDU8_USTMA
biological_process	GO:0000710	meiotic mismatch repair	2	3	0.666667	0.985386	0.150242	1	1	A0A0D1CF39_USTMA	A0A0D1CQ83_USTMA
cellular_component	GO:0030133	transport vesicle	2	2	1	0.997816	0.00777433	1	0.698	A0A0D1DU73_USTMA	A0A0D1CLQ0_USTMA
cellular_component	GO:0034967	Set3 complex	2	3	0.666667	0.987782	0.134836	1	1	A0A0D1CDB5_USTMA	A0A0D1E8N3_USTMA
biological_process	GO:0018279	protein N-linked glycosylation via asparagine	2	6	0.333333	0.83904	0.453491	1	1	A0A0D1CAH9_USTMA	A0A0D1C1H1_USTMA
biological_process	GO:0032790	ribosome disassembly	2	4	0.5	0.952246	0.25273	1	1	A0A0D1CBB6_USTMA	A0A0D1DVG4_USTMA
cellular_component	GO:0034271	phosphatidylinositol 3-kinase complex, class III, type I	2	3	0.666667	0.987782	0.134836	1	1	A0A0D1E9M7_USTMA	A0A0D1CXP7_USTMA
cellular_component	GO:0034272	phosphatidylinositol 3-kinase complex, class III, type II	2	3	0.666667	0.987782	0.134836	1	1	A0A0D1E9M7_USTMA	A0A0D1CXP7_USTMA
biological_process	GO:0045324	late endosome to vacuole transport	2	6	0.333333	0.492004	0.697417	1	1	A0A0D1C6E5_USTMA	A0A0D1CXP7_USTMA
molecular_function	GO:0000026	alpha-1,2-mannosyltransferase activity	2	6	0.333333	0.788211	0.515559	1	1	A0A0D1DSV0_USTMA	A0A0D1E6S4_USTMA
biological_process	GO:0070979	protein K11-linked ubiquitination	2	4	0.5	0.952246	0.25273	1	1	A0A0D1CTU9_USTMA	A0A0D1DSX4_USTMA
molecular_function	GO:0043024	ribosomal small subunit binding	2	5	0.4	0.912366	0.334314	1	1	A0A0D1DPN0_USTMA	A0A0D1DTT6_USTMA
molecular_function	GO:0042910	xenobiotic transmembrane transporter activity	2	23	0.0869565	0.268548	0.871387	1	1	A0A0D1D1M0_USTMA	A0A0D1DZE3_USTMA
biological_process	GO:0016540	protein autoprocessing	2	3	0.666667	0.985386	0.150242	1	1	A0A0D1CSH0_USTMA	A0A0D1DVX3_USTMA
molecular_function	GO:0051377	mannose-ethanolamine phosphotransferase activity	2	2	1	1	0.0549036	1	1	A0A0D1CGF9_USTMA	A0A0D1E102_USTMA
biological_process	GO:0009396	folic acid-containing compound biosynthetic process	2	3	0.666667	0.767502	0.541888	1	1	A0A0D1DWY9_USTMA	A0A0D1DPA2_USTMA
cellular_component	GO:0055037	recycling endosome	2	3	0.666667	0.959557	0.229229	1	1	A0A0D1DWU6_USTMA	A0A0D1ECM1_USTMA
molecular_function	GO:0070034	telomerase RNA binding	2	3	0.666667	0.987151	0.139013	1	1	A0A0D1EAT9_USTMA	A0A0D1E6T4_USTMA
biological_process	GO:0042770	signal transduction in response to DNA damage	2	2	1	0.974789	0.0657257	1	1	A0A0D1CDD4_USTMA	A0A0D1E136_USTMA
biological_process	GO:0001731	formation of translation preinitiation complex	2	8	0.25	0.691822	0.619791	1	1	A0A0D1DPN0_USTMA	A0A0D1DTT6_USTMA
biological_process	GO:0042149	cellular response to glucose starvation	2	5	0.4	0.902147	0.355981	1	1	A0A0D1E669_USTMA	A0A0D1CXM3_USTMA
molecular_function	GO:0052742	phosphatidylinositol kinase activity	2	3	0.666667	0.996995	0.0423828	1	1	A0A0D1E9M7_USTMA	A0A0D1DX37_USTMA
molecular_function	GO:0005227	calcium activated cation channel activity	2	4	0.5	0.957617	0.235642	1	1	A0A0D1DZL1_USTMA	A0A0D1DVU1_USTMA
biological_process	GO:0006464	cellular protein modification process	2	5	0.4	0.998878	0.00161546	1	0.534	A0A0D1E1G0_USTMA	A0A0D1E2K5_USTMA
biological_process	GO:0045053	protein retention in Golgi apparatus	2	5	0.4	0.902147	0.355981	1	1	A0A0D1C6E5_USTMA	A0A0D1CRQ3_USTMA
biological_process	GO:0006783	heme biosynthetic process	2	7	0.285714	0.407001	0.831947	1	1	A0A0D1EA13_USTMA	A0A0D1CJ01_USTMA
biological_process	GO:0035999	tetrahydrofolate interconversion	2	5	0.4	0.902147	0.355981	1	1	A0A0D1DWY9_USTMA	A0A0D1E2B8_USTMA
molecular_function	GO:0033592	RNA strand annealing activity	2	4	0.5	0.957617	0.235642	1	1	A0A0D1DPN0_USTMA	A0A0D1DTT6_USTMA
molecular_function	GO:0034057	RNA strand-exchange activity	2	3	0.666667	0.987151	0.139013	1	1	A0A0D1DPN0_USTMA	A0A0D1DTT6_USTMA
biological_process	GO:0097010	eukaryotic translation initiation factor 4F complex assembly	2	3	0.666667	0.985386	0.150242	1	1	A0A0D1DPN0_USTMA	A0A0D1DTT6_USTMA
cellular_component	GO:0030286	dynein complex	2	4	0.5	0.795897	0.505403	1	1	A0A0D1DZW2_USTMA	A0A0D1DVE7_USTMA
molecular_function	GO:0008574	plus-end-directed microtubule motor activity	2	4	0.5	0.957617	0.235642	1	1	A0A0D1CLV6_USTMA	A0A0D1DQH0_USTMA
molecular_function	GO:0005262	calcium channel activity	2	6	0.333333	0.854592	0.428768	1	1	A0A0D1E0H0_USTMA	A0A0D1DUR5_USTMA
cellular_component	GO:0031422	RecQ family helicase-topoisomerase III complex	2	4	0.5	0.959557	0.229229	1	1	A0A0D1CUQ8_USTMA	A0A0D1CQL4_USTMA
cellular_component	GO:0005655	nucleolar ribonuclease P complex	2	4	0.5	0.959557	0.229229	1	1	A0A0D1DXZ8_USTMA	A0A0D1E280_USTMA
biological_process	GO:0048278	vesicle docking	2	6	0.333333	0.704148	0.519658	1	1	A0A0D1C8P8_USTMA	A0A0D1DYV8_USTMA
biological_process	GO:0006906	vesicle fusion	2	9	0.222222	0.638766	0.56381	1	1	A0A0D1C8P8_USTMA	A0A0D1DYV8_USTMA
biological_process	GO:0018026	peptidyl-lysine monomethylation	2	4	0.5	0.952246	0.25273	1	1	A0A0D1E6V2_USTMA	A0A0D1E157_USTMA
biological_process	GO:0019441	tryptophan catabolic process to kynurenine	2	6	0.333333	0.83904	0.453491	1	1	A0A0D1DV96_USTMA	A0A0D1E3U6_USTMA
cellular_component	GO:0005795	Golgi stack	2	4	0.5	0.819755	0.415296	1	1	A0A0D1CSH0_USTMA	A0A0D1C041_USTMA
cellular_component	GO:1990071	TRAPPII protein complex	2	4	0.5	0.959557	0.229229	1	1	A0A0D1DNV8_USTMA	A0A0D1CSF3_USTMA
molecular_function	GO:0051213	dioxygenase activity	2	6	0.333333	0.913221	0.180166	1	1	A0A0D1CJ18_USTMA	A0A0D1CJ01_USTMA
cellular_component	GO:0005951	carbamoyl-phosphate synthase complex	2	2	1	1	0.0530907	1	1	A0A0D1E223_USTMA	A0A0D1DTC4_USTMA
molecular_function	GO:0004088	carbamoyl-phosphate synthase (glutamine-hydrolyzing) activity	2	3	0.666667	0.987151	0.139013	1	1	A0A0D1E223_USTMA	A0A0D1DTC4_USTMA
biological_process	GO:0008053	mitochondrial fusion	2	3	0.666667	0.985386	0.150242	1	1	A0A0D1DPI1_USTMA	A0A0D1C5I7_USTMA
molecular_function	GO:0017168	5-oxoprolinase (ATP-hydrolyzing) activity	2	2	1	1	0.0549036	1	1	A0A0D1DZ67_USTMA	A0A0D1E6W1_USTMA
cellular_component	GO:0000815	ESCRT III complex	2	6	0.333333	0.860311	0.419317	1	1	A0A0D1CI88_USTMA	A0A0D1DZX0_USTMA
cellular_component	GO:0005771	multivesicular body	2	9	0.222222	0.516862	0.75982	1	1	A0A0D1CI88_USTMA	A0A0D1DZX0_USTMA
molecular_function	GO:0000285	1-phosphatidylinositol-3-phosphate 5-kinase activity	2	2	1	1	0.0549036	1	1	A0A0D1DMX3_USTMA	A0A0D1D198_USTMA
biological_process	GO:0061817	endoplasmic reticulum-plasma membrane tethering	2	5	0.4	0.902147	0.355981	1	1	A0A0D1CVI3_USTMA	A0A0D1E151_USTMA
molecular_function	GO:0005052	peroxisome matrix targeting signal-1 binding	2	2	1	1	0.0549036	1	1	A0A0D1E6M2_USTMA	A0A0D1C6B6_USTMA
biological_process	GO:0015693	magnesium ion transport	2	4	0.5	0.952246	0.25273	1	1	A0A0D1C1B5_USTMA	A0A0D1CBN9_USTMA
biological_process	GO:0045333	cellular respiration	2	2	1	0.000181367	0.99996	0.03	1	A0A0D1CJ01_USTMA	A0A0D1BWP5_USTMA
biological_process	GO:0019915	lipid storage	2	4	0.5	0.83904	0.453491	1	1	A0A0D1DTN0_USTMA	A0A0D1CIJ0_USTMA
molecular_function	GO:0004713	protein tyrosine kinase activity	2	2	1	0.996995	0.0423828	1	1	A0A0D1BZL7_USTMA	A0A0D1E724_USTMA
molecular_function	GO:0050072	m7G(5')pppN diphosphatase activity	2	3	0.666667	0.987151	0.139013	1	1	A0A0D1CXH6_USTMA	A0A0D1E4L2_USTMA
cellular_component	GO:0005697	telomerase holoenzyme complex	2	2	1	0.997191	0.0404434	1	0.999	A0A0D1C0Z7_USTMA	A0A0D1E6T4_USTMA
molecular_function	GO:0004605	phosphatidate cytidylyltransferase activity	2	2	1	1	0.0549036	1	1	A0A0D1DQE3_USTMA	A0A0D1CTA0_USTMA
biological_process	GO:0032049	cardiolipin biosynthetic process	2	3	0.666667	0.985386	0.150242	1	1	A0A0D1DQE3_USTMA	A0A0D1CUP4_USTMA
biological_process	GO:0016024	CDP-diacylglycerol biosynthetic process	2	2	1	1	0.0598232	1	1	A0A0D1DQE3_USTMA	A0A0D1CTA0_USTMA
molecular_function	GO:0042124	1,3-beta-glucanosyltransferase activity	2	3	0.666667	0.987151	0.139013	1	1	A0A0D1CGD9_USTMA	A0A0D1CG62_USTMA
molecular_function	GO:0042973	glucan endo-1,3-beta-D-glucosidase activity	2	2	1	1	0.0549036	1	1	A0A0D1CGD9_USTMA	A0A0D1CG62_USTMA
cellular_component	GO:0055087	Ski complex	2	2	1	1	0.0530907	1	1	A0A0D1ECR1_USTMA	A0A0D1D0I7_USTMA
biological_process	GO:0097428	protein maturation by iron-sulfur cluster transfer	2	4	0.5	0.83904	0.453491	1	1	A0A0D1C4H8_USTMA	A0A0D1E5F4_USTMA
molecular_function	GO:0004430	1-phosphatidylinositol 4-kinase activity	2	3	0.666667	0.987151	0.139013	1	1	A0A0D1DX37_USTMA	A0A0D1E277_USTMA
cellular_component	GO:0030139	endocytic vesicle	2	3	0.666667	0.868981	0.344781	1	1	A0A0D1C5J2_USTMA	A0A0D1E1L9_USTMA
molecular_function	GO:0004683	calmodulin-dependent protein kinase activity	2	3	0.666667	0.987151	0.139013	1	1	A0A0D1DTH1_USTMA	A0A0D1BUZ1_USTMA
cellular_component	GO:0031251	PAN complex	2	2	1	1	0.0530907	1	1	A0A0D1DT60_USTMA	A0A0D1E1J8_USTMA
cellular_component	GO:0000506	glycosylphosphatidylinositol-N-acetylglucosaminyltransferase (GPI-GnT) complex	2	3	0.666667	0.987782	0.134836	1	1	A0A0D1CKY9_USTMA	A0A0D1EBQ5_USTMA
biological_process	GO:0031297	replication fork processing	2	4	0.5	0.988377	0.0655775	1	1	A0A0D1C943_USTMA	A0A0D1E1Y0_USTMA
biological_process	GO:0034508	centromere complex assembly	2	2	1	0.807484	0.397905	1	1	A0A0D1DXU8_USTMA	A0A0D1DW01_USTMA
biological_process	GO:0042791	5S class rRNA transcription by RNA polymerase III	2	2	1	1	0.0598232	1	1	A0A0D1CJU8_USTMA	A0A0D1BVP4_USTMA
biological_process	GO:0044773	mitotic DNA damage checkpoint signaling	2	2	1	0.999679	0.00236004	1	0.646	A0A0D1C7N3_USTMA	A0A0D1E136_USTMA
biological_process	GO:0033260	nuclear DNA replication	2	2	1	0.240965	0.900487	1	1	A0A0D1C7N3_USTMA	A0A0D1E687_USTMA
biological_process	GO:0006607	NLS-bearing protein import into nucleus	2	2	1	1	0.0598232	1	1	A0A0D1CIG6_USTMA	A0A0D1E1J0_USTMA
biological_process	GO:0015886	heme transport	2	2	1	1	0.0598232	1	1	A0A0D1C5I7_USTMA	A0A0D1DPL8_USTMA
biological_process	GO:0038203	TORC2 signaling	2	2	1	0.952246	0.25273	1	1	A0A0D1DP54_USTMA	A0A0D1E5Y7_USTMA
molecular_function	GO:0004309	exopolyphosphatase activity	2	3	0.666667	0.987151	0.139013	1	1	A0A0D1E4H6_USTMA	A0A0D1DW11_USTMA
biological_process	GO:0006798	polyphosphate catabolic process	2	3	0.666667	0.985386	0.150242	1	1	A0A0D1E4H6_USTMA	A0A0D1DW11_USTMA
biological_process	GO:0048280	vesicle fusion with Golgi apparatus	2	6	0.333333	0.83904	0.453491	1	1	A0A0D1DR17_USTMA	A0A0D1C041_USTMA
molecular_function	GO:0003976	UDP-N-acetylglucosamine-lysosomal-enzyme N-acetylglucosaminephosphotransferase activity	2	3	0.666667	0.987151	0.139013	1	1	A0A0D1E1P0_USTMA	A0A0D1E793_USTMA
biological_process	GO:0046835	carbohydrate phosphorylation	2	3	0.666667	0.952246	0.25273	1	1	A0A0D1E1P0_USTMA	A0A0D1E793_USTMA
biological_process	GO:0016256	N-glycan processing to lysosome	2	3	0.666667	0.985386	0.150242	1	1	A0A0D1E1P0_USTMA	A0A0D1E793_USTMA
cellular_component	GO:0031533	mRNA cap methyltransferase complex	2	2	1	1	0.0530907	1	1	A0A0D1DYL2_USTMA	A0A0D1DWA0_USTMA
molecular_function	GO:1990269	RNA polymerase II C-terminal domain phosphoserine binding	2	2	1	1	0.0549036	1	1	A0A0D1CIH0_USTMA	A0A0D1DPQ2_USTMA
molecular_function	GO:0004061	arylformamidase activity	2	2	1	1	0.0549036	1	1	A0A0D1DV96_USTMA	A0A0D1E3U6_USTMA
cellular_component	GO:0034044	exomer complex	2	2	1	1	0.0530907	1	1	A0A0D1DX52_USTMA	A0A0D1DYZ3_USTMA
biological_process	GO:1990573	potassium ion import across plasma membrane	2	2	1	1	0.0598232	1	1	A0A0D1DUV7_USTMA	A0A0D1CKG8_USTMA
molecular_function	GO:0008409	5'-3' exonuclease activity	1	5	0.2	0.959486	0.12684	1	1	A0A0D1DZ35_USTMA
cellular_component	GO:0000159	protein phosphatase type 2A complex	1	6	0.166667	0.580683	0.792627	1	1	A0A0D1CI23_USTMA
cellular_component	GO:0000775	chromosome, centromeric region	1	6	0.166667	0.802036	0.302482	1	1	A0A0D1BZ81_USTMA
molecular_function	GO:0000150	DNA strand exchange activity	1	2	0.5	0.945096	0.413916	1	1	A0A0D1E3Q0_USTMA
biological_process	GO:0000730	DNA recombinase assembly	1	2	0.5	0.849758	0.569212	1	1	A0A0D1E3Q0_USTMA
biological_process	GO:0051260	protein homooligomerization	1	2	0.5	0.940177	0.429556	1	1	A0A0D1DPL8_USTMA
biological_process	GO:0042148	strand invasion	1	2	0.5	0.849758	0.569212	1	1	A0A0D1E3Q0_USTMA
molecular_function	GO:0016818	hydrolase activity, acting on acid anhydrides, in phosphorus-containing anhydrides	1	3	0.333333	0.622032	0.450259	1	1	RAD5_USTMA
molecular_function	GO:0031176	endo-1,4-beta-xylanase activity	1	3	0.333333	0.860987	0.551367	1	1	XIN1_USTMA
cellular_component	GO:0000812	Swr1 complex	1	8	0.125	0.417305	0.877327	1	1	A0A0D1CNC9_USTMA
biological_process	GO:0043486	histone exchange	1	8	0.125	0.207878	0.954575	1	1	A0A0D1CNC9_USTMA
biological_process	GO:0000727	double-strand break repair via break-induced replication	1	12	0.0833333	0.168053	0.965723	1	1	A0A0D1E418_USTMA
molecular_function	GO:0008194	UDP-glycosyltransferase activity	1	2	0.5	0.999111	0.00369486	1	0.654	A0A0D1DZW9_USTMA
molecular_function	GO:0030674	protein-macromolecule adaptor activity	1	8	0.125	0.635845	0.524122	1	1	SLA1_USTMA
cellular_component	GO:0070390	transcription export complex 2	1	4	0.25	0.770771	0.649549	1	1	A0A0D1E159_USTMA
biological_process	GO:0006368	transcription elongation from RNA polymerase II promoter	1	17	0.0588235	0.0102549	0.99884	0.885	1	A0A0D1CIH0_USTMA
biological_process	GO:0032784	regulation of DNA-templated transcription, elongation	1	2	0.5	0.323552	0.85412	1	1	A0A0D1DT20_USTMA
biological_process	GO:0000077	DNA damage checkpoint signaling	1	8	0.125	0.974789	0.0657257	1	1	CHK1_USTMA
biological_process	GO:0016320	endoplasmic reticulum membrane fusion	1	1	1	1	0.244689	1	1	SEY1_USTMA
biological_process	GO:0030435	sporulation resulting in formation of a cellular spore	1	4	0.25	0.644019	0.754388	1	1	STUA_USTMA
biological_process	GO:0000413	protein peptidyl-prolyl isomerization	1	11	0.0909091	0.207878	0.954575	1	1	PPIL2_USTMA
molecular_function	GO:0052689	carboxylic ester hydrolase activity	1	7	0.142857	0.609944	0.527233	1	1	A0A0D1CLL2_USTMA
molecular_function	GO:0008474	palmitoyl-(protein) hydrolase activity	1	5	0.2	0.665686	0.737183	1	1	A0A0D1CIQ8_USTMA
biological_process	GO:0002084	protein depalmitoylation	1	3	0.333333	0.849758	0.569212	1	1	A0A0D1CIQ8_USTMA
cellular_component	GO:0005686	U2 snRNP	1	20	0.05	0.0367155	0.994775	0.961	1	A0A0D1BXS7_USTMA
biological_process	GO:0009060	aerobic respiration	1	20	0.05	2.32546e-05	0.999997	0.003	1	A0A0D1DQS9_USTMA
biological_process	GO:0006099	tricarboxylic acid cycle	1	22	0.0454545	0.0167024	0.997958	0.968	1	A0A0D1E945_USTMA
cellular_component	GO:0071007	U2-type catalytic step 2 spliceosome	1	5	0.2	0.673892	0.730409	1	1	CWC2_USTMA
molecular_function	GO:0036002	pre-mRNA binding	1	2	0.5	0.40691	0.882225	1	1	CWC2_USTMA
biological_process	GO:0090114	COPII-coated vesicle budding	1	1	1	0.893637	0.308178	1	1	SEC13_USTMA
biological_process	GO:0032008	positive regulation of TOR signaling	1	3	0.333333	0.74727	0.674707	1	1	SEC13_USTMA
biological_process	GO:1904263	positive regulation of TORC1 signaling	1	2	0.5	0.940177	0.429556	1	1	SEC13_USTMA
biological_process	GO:0032527	protein exit from endoplasmic reticulum	1	1	1	0.902147	0.355981	1	1	SEC13_USTMA
molecular_function	GO:0031491	nucleosome binding	1	6	0.166667	0.40691	0.882225	1	1	A0A0D1CNC9_USTMA
biological_process	GO:0032968	positive regulation of transcription elongation from RNA polymerase II promoter	1	11	0.0909091	0.168053	0.965723	1	1	A0A0D1CIH0_USTMA
biological_process	GO:0010106	cellular response to iron ion starvation	1	3	0.333333	0.849758	0.569212	1	1	SID2_USTMA
molecular_function	GO:0031172	ornithine N5-monooxygenase activity	1	1	1	1	0.23441	1	1	SIDA_USTMA
biological_process	GO:0090110	COPII-coated vesicle cargo loading	1	4	0.25	0.74727	0.674707	1	1	SEC23_USTMA
biological_process	GO:0000469	cleavage involved in rRNA processing	1	5	0.2	0.148589	0.938365	1	1	A0A0D1E362_USTMA
cellular_component	GO:1990304	MUB1-RAD6-UBR2 ubiquitin ligase complex	1	2	0.5	0.946909	0.407925	1	1	A0A0D1DYV9_USTMA
molecular_function	GO:0070628	proteasome binding	1	7	0.142857	0.484441	0.846083	1	1	A0A0D1CB29_USTMA
molecular_function	GO:0061631	ubiquitin conjugating enzyme activity	1	15	0.0666667	0.101328	0.981949	1	1	A0A0D1DZT1_USTMA
biological_process	GO:0070987	error-free translesion synthesis	1	2	0.5	0.940177	0.429556	1	1	A0A0D1E5N9_USTMA
biological_process	GO:0010390	histone monoubiquitination	1	2	0.5	0.940177	0.429556	1	1	BRE1_USTMA
biological_process	GO:0070534	protein K63-linked ubiquitination	1	4	0.25	0.74727	0.674707	1	1	A0A0D1E876_USTMA
biological_process	GO:0051569	regulation of histone H3-K4 methylation	1	2	0.5	0.940177	0.429556	1	1	A0A0D1DP85_USTMA
biological_process	GO:0071596	ubiquitin-dependent protein catabolic process via the N-end rule pathway	1	2	0.5	0.940177	0.429556	1	1	A0A0D1EBB2_USTMA
molecular_function	GO:0043022	ribosome binding	1	17	0.0588235	0.0422751	0.99383	0.997	1	A0A0D1DYS1_USTMA
biological_process	GO:0042026	protein refolding	1	8	0.125	0.380209	0.894332	1	1	A0A0D1DT43_USTMA
molecular_function	GO:0004693	cyclin-dependent protein serine/threonine kinase activity	1	7	0.142857	0.484441	0.846083	1	1	SSN3_USTMA
molecular_function	GO:0008353	RNA polymerase II CTD heptapeptide repeat kinase activity	1	4	0.25	0.764358	0.656609	1	1	SSN3_USTMA
biological_process	GO:0032447	protein urmylation	1	4	0.25	0.74727	0.674707	1	1	A0A0D1E0S3_USTMA
biological_process	GO:0019236	response to pheromone	1	2	0.5	0.0866066	0.98528	1	1	STE20_USTMA
biological_process	GO:0098789	pre-mRNA cleavage required for polyadenylation	1	5	0.2	0.644019	0.754388	1	1	A0A0D1DWQ1_USTMA
molecular_function	GO:0052906	tRNA (guanine(37)-N(1))-methyltransferase activity	1	1	1	1	0.23441	1	1	TRM5_USTMA
molecular_function	GO:0009019	tRNA (guanine-N1-)-methyltransferase activity	1	2	0.5	0.945096	0.413916	1	1	TRM5_USTMA
biological_process	GO:0070901	mitochondrial tRNA methylation	1	1	1	1	0.244689	1	1	TRM5_USTMA
biological_process	GO:0002939	tRNA N1-guanine methylation	1	1	1	1	0.244689	1	1	TRM5_USTMA
molecular_function	GO:0016616	oxidoreductase activity, acting on the CH-OH group of donors, NAD or NADP as acceptor	1	19	0.0526316	1.93481e-06	1	0	1	A0A0D1BVZ2_USTMA
molecular_function	GO:0004151	dihydroorotase activity	1	3	0.333333	0.860987	0.551367	1	1	A0A0D1DTC4_USTMA
biological_process	GO:0000349	generation of catalytic spliceosome for first transesterification step	1	3	0.333333	0.849758	0.569212	1	1	A0A0D1E876_USTMA
biological_process	GO:0043111	replication fork arrest	1	1	1	1	0.244689	1	1	TOF1_USTMA
cellular_component	GO:0022627	cytosolic small ribosomal subunit	1	30	0.0333333	0.0037612	0.999626	0.205	1	A0A0D1EDG3_USTMA
biological_process	GO:0002181	cytoplasmic translation	1	24	0.0416667	0.00320859	0.999029	0.492	1	A0A0D1CBR1_USTMA
biological_process	GO:0000028	ribosomal small subunit assembly	1	13	0.0769231	0.10842	0.980488	1	1	A0A0D1DNQ3_USTMA
molecular_function	GO:0046975	histone methyltransferase activity (H3-K36 specific)	1	2	0.5	0.945096	0.413916	1	1	A0A0D1ECE5_USTMA
cellular_component	GO:0008023	transcription elongation factor complex	1	4	0.25	0.694802	0.503812	1	1	A0A0D1DRG9_USTMA
biological_process	GO:0050684	regulation of mRNA processing	1	2	0.5	0.255823	0.939806	1	1	A0A0D1DX92_USTMA
molecular_function	GO:0005200	structural constituent of cytoskeleton	1	6	0.166667	0.571232	0.798866	1	1	TBB_USTMA
molecular_function	GO:0004534	5'-3' exoribonuclease activity	1	2	0.5	0.945096	0.413916	1	1	A0A0D1CXS6_USTMA
biological_process	GO:0000956	nuclear-transcribed mRNA catabolic process	1	7	0.142857	0.994232	0.0126912	1	0.995	A0A0D1CXS6_USTMA
cellular_component	GO:0034455	t-UTP complex	1	2	0.5	0.946909	0.407925	1	1	UTP10_USTMA
biological_process	GO:0034354	'de novo' NAD biosynthetic process from tryptophan	1	5	0.2	0.644019	0.754388	1	1	KMO_USTMA
biological_process	GO:0043420	anthranilate metabolic process	1	3	0.333333	0.849758	0.569212	1	1	KMO_USTMA
biological_process	GO:0019805	quinolinate biosynthetic process	1	3	0.333333	0.849758	0.569212	1	1	KMO_USTMA
biological_process	GO:0006569	tryptophan catabolic process	1	2	0.5	0.893637	0.308178	1	1	KMO_USTMA
molecular_function	GO:0020037	heme binding	1	50	0.02	2.38894e-05	0.999999	0.002	1	A0A0D1DV12_USTMA
biological_process	GO:0006314	intron homing	1	11	0.0909091	0.207878	0.954575	1	1	IEND1_USTMA
cellular_component	GO:0048046	apoplast	1	1	1	1	0.230508	1	1	CMU1_USTMA
cellular_component	GO:0044164	host cell cytosol	1	1	1	1	0.230508	1	1	CMU1_USTMA
molecular_function	GO:0004106	chorismate mutase activity	1	2	0.5	0.945096	0.413916	1	1	CMU1_USTMA
biological_process	GO:0009073	aromatic amino acid family biosynthetic process	1	7	0.142857	0.250203	0.913393	1	1	CMU1_USTMA
biological_process	GO:0046417	chorismate metabolic process	1	2	0.5	0.644019	0.754388	1	1	CMU1_USTMA
biological_process	GO:0140502	effector-mediated suppression of host salicylic acid-mediated innate immune signalling	1	1	1	1	0.244689	1	1	CMU1_USTMA
cellular_component	GO:0005769	early endosome	1	8	0.125	0.584704	0.709514	1	1	A0A0D1DU73_USTMA
biological_process	GO:0006878	cellular copper ion homeostasis	1	9	0.111111	0.312961	0.920244	1	1	A0A0D1E4F3_USTMA
molecular_function	GO:0031624	ubiquitin conjugating enzyme binding	1	6	0.166667	0.571232	0.798866	1	1	A0A0D1DYQ5_USTMA
molecular_function	GO:0140312	cargo adaptor activity	1	2	0.5	0.484441	0.846083	1	1	A0A0D1CEI5_USTMA
molecular_function	GO:0035615	clathrin adaptor activity	1	7	0.142857	0.484441	0.846083	1	1	A0A0D1CEI5_USTMA
cellular_component	GO:0000276	mitochondrial proton-transporting ATP synthase complex, coupling factor F(o)	1	9	0.111111	0.24018	0.944216	1	1	A0A0D1BW64_USTMA
biological_process	GO:0015986	ATP synthesis coupled proton transport	1	15	0.0666667	0.0689648	0.988897	1	1	A0A0D1BW64_USTMA
biological_process	GO:0045048	protein insertion into ER membrane	1	3	0.333333	0.644019	0.754388	1	1	A0A0D1E3H6_USTMA
biological_process	GO:0016126	sterol biosynthetic process	1	14	0.0714286	0.0886894	0.97089	1	1	A0A0D1E3E8_USTMA
biological_process	GO:0008652	cellular amino acid biosynthetic process	1	8	0.125	0.00978344	0.995773	0.875	1	A0A0D1DTR5_USTMA
cellular_component	GO:0031314	extrinsic component of mitochondrial inner membrane	1	8	0.125	0.417305	0.877327	1	1	A0A0D1C5I7_USTMA
biological_process	GO:0000480	endonucleolytic cleavage in 5'-ETS of tricistronic rRNA transcript (SSU-rRNA, 5.8S rRNA, LSU-rRNA)	1	5	0.2	0.644019	0.754388	1	1	A0A0D1E2E2_USTMA
biological_process	GO:0000472	endonucleolytic cleavage to generate mature 5'-end of SSU-rRNA from (SSU-rRNA, 5.8S rRNA, LSU-rRNA)	1	5	0.2	0.644019	0.754388	1	1	A0A0D1E2E2_USTMA
molecular_function	GO:0051536	iron-sulfur cluster binding	1	5	0.2	0.108038	0.947591	1	1	NAR1_USTMA
biological_process	GO:0000245	spliceosomal complex assembly	1	5	0.2	0.380209	0.894332	1	1	A0A0D1DX92_USTMA
cellular_component	GO:0035267	NuA4 histone acetyltransferase complex	1	10	0.1	0.516862	0.75982	1	1	A0A0D1DS11_USTMA
biological_process	GO:0000973	posttranscriptional tethering of RNA polymerase II gene DNA at nuclear periphery	1	4	0.25	0.74727	0.674707	1	1	A0A0D1DS72_USTMA
biological_process	GO:0017183	peptidyl-diphthamide biosynthetic process from peptidyl-histidine	1	5	0.2	0.644019	0.754388	1	1	A0A0D1E234_USTMA
molecular_function	GO:0008237	metallopeptidase activity	1	12	0.0833333	0.176192	0.907147	1	1	A0A0D1E264_USTMA
biological_process	GO:0000338	protein deneddylation	1	4	0.25	0.74727	0.674707	1	1	A0A0D1D204_USTMA
biological_process	GO:0006417	regulation of translation	1	5	0.2	0.820242	0.264052	1	1	A0A0D1DVG4_USTMA
molecular_function	GO:0004497	monooxygenase activity	1	27	0.037037	0.247377	0.847008	1	1	A0A0D1DVK4_USTMA
biological_process	GO:0045892	negative regulation of transcription, DNA-templated	1	6	0.166667	0.0295276	0.98739	0.999	1	A0A0D1C1L3_USTMA
molecular_function	GO:0045145	single-stranded DNA 5'-3' exodeoxyribonuclease activity	1	2	0.5	0.945096	0.413916	1	1	A0A0D1C0K3_USTMA
biological_process	GO:0043137	DNA replication, removal of RNA primer	1	5	0.2	0.644019	0.754388	1	1	A0A0D1DQ00_USTMA
biological_process	GO:0006488	dolichol-linked oligosaccharide biosynthetic process	1	6	0.166667	0.458112	0.860014	1	1	A0A0D1CFY9_USTMA
biological_process	GO:0090305	nucleic acid phosphodiester bond hydrolysis	1	3	0.333333	0.16806	0.900555	1	1	A0A0D1E3V2_USTMA
cellular_component	GO:0015629	actin cytoskeleton	1	3	0.333333	0.925145	0.13392	1	1	MYO1_USTMA
biological_process	GO:0030042	actin filament depolymerization	1	3	0.333333	0.546509	0.814568	1	1	A0A0D1C868_USTMA
cellular_component	GO:0070545	PeBoW complex	1	2	0.5	0.946909	0.407925	1	1	ERB1_USTMA
molecular_function	GO:0070180	large ribosomal subunit rRNA binding	1	6	0.166667	0.571232	0.798866	1	1	ERB1_USTMA
molecular_function	GO:0043021	ribonucleoprotein complex binding	1	3	0.333333	0.17949	0.915183	1	1	ERB1_USTMA
molecular_function	GO:0004174	electron-transferring-flavoprotein dehydrogenase activity	1	6	0.166667	0.571232	0.798866	1	1	A0A0D1DWV7_USTMA
cellular_component	GO:0031429	box H/ACA snoRNP complex	1	6	0.166667	0.580683	0.792627	1	1	A0A0D1E362_USTMA
molecular_function	GO:0034513	box H/ACA snoRNA binding	1	5	0.2	0.665686	0.737183	1	1	A0A0D1E362_USTMA
cellular_component	GO:0016282	eukaryotic 43S preinitiation complex	1	15	0.0666667	0.107436	0.980513	1	1	EIF3L_USTMA
cellular_component	GO:0033290	eukaryotic 48S preinitiation complex	1	15	0.0666667	0.107436	0.980513	1	1	EIF3L_USTMA
biological_process	GO:0001732	formation of cytoplasmic translation initiation complex	1	15	0.0666667	0.0866066	0.98528	1	1	EIF3L_USTMA
molecular_function	GO:0016853	isomerase activity	1	8	0.125	0.00033689	0.999914	0.033	1	FER4_USTMA
molecular_function	GO:0004502	kynurenine 3-monooxygenase activity	1	1	1	1	0.23441	1	1	KMO_USTMA
cellular_component	GO:0005849	mRNA cleavage factor complex	1	3	0.333333	0.914503	0.234386	1	1	CLP1_USTMA
biological_process	GO:0006388	tRNA splicing, via endonucleolytic cleavage and ligation	1	5	0.2	0.312961	0.920244	1	1	CLP1_USTMA
biological_process	GO:0016125	sterol metabolic process	1	5	0.2	0.108558	0.957697	1	1	A0A0D1CXV0_USTMA
cellular_component	GO:0000421	autophagosome membrane	1	2	0.5	0.946909	0.407925	1	1	A0A0D1CHU6_USTMA
cellular_component	GO:0031410	cytoplasmic vesicle	1	12	0.0833333	0.998497	0.0026335	1	0.286	A0A0D1CRH0_USTMA
molecular_function	GO:0034512	box C/D RNA binding	1	1	1	1	0.23441	1	1	DBP4_USTMA
molecular_function	GO:0016757	glycosyltransferase activity	1	8	0.125	0.660262	0.442307	1	1	A0A0D1E7S4_USTMA
cellular_component	GO:0005852	eukaryotic translation initiation factor 3 complex	1	10	0.1	0.161877	0.967025	1	1	EIF3L_USTMA
molecular_function	GO:0031369	translation initiation factor binding	1	9	0.111111	0.23095	0.947258	1	1	A0A0D1EAJ2_USTMA
biological_process	GO:0006413	translational initiation	1	10	0.1	0.0937921	0.960931	1	1	EIF3L_USTMA
biological_process	GO:0045787	positive regulation of cell cycle	1	1	1	0.853541	0.279733	1	1	CWC2_USTMA
biological_process	GO:0033120	positive regulation of RNA splicing	1	1	1	0.849758	0.569212	1	1	CWC2_USTMA
molecular_function	GO:0004620	phospholipase activity	1	4	0.25	0.46254	0.761661	1	1	A0A0D1CIT9_USTMA
biological_process	GO:0008643	carbohydrate transport	1	18	0.0555556	0.0433713	0.993684	0.999	1	HUT1_USTMA
molecular_function	GO:0016410	N-acyltransferase activity	1	4	0.25	0.0772867	0.968662	1	1	FER5_USTMA
biological_process	GO:0019290	siderophore biosynthetic process	1	2	0.5	0.985645	0.0978533	1	1	FER5_USTMA
cellular_component	GO:0005881	cytoplasmic microtubule	1	6	0.166667	0.494597	0.840498	1	1	STU1_USTMA
cellular_component	GO:0005875	microtubule associated complex	1	2	0.5	0.733295	0.443253	1	1	A0A0D1DVE7_USTMA
molecular_function	GO:0051010	microtubule plus-end binding	1	5	0.2	0.665686	0.737183	1	1	A0A0D1DVE7_USTMA
biological_process	GO:0000132	establishment of mitotic spindle orientation	1	3	0.333333	0.849758	0.569212	1	1	A0A0D1DVE7_USTMA
molecular_function	GO:0008137	NADH dehydrogenase (ubiquinone) activity	1	14	0.0714286	0.125201	0.976397	1	1	A0A0D1E7Y7_USTMA
cellular_component	GO:0070847	core mediator complex	1	5	0.2	0.673892	0.730409	1	1	MED6_USTMA
cellular_component	GO:0030014	CCR4-NOT complex	1	3	0.333333	0.997319	0.0192081	1	0.974	A0A0D1E4H5_USTMA
molecular_function	GO:0004535	poly(A)-specific ribonuclease activity	1	4	0.25	0.764358	0.656609	1	1	A0A0D1DT60_USTMA
biological_process	GO:0006342	heterochromatin assembly	1	5	0.2	NA	NA	NA	NA	A0A0D1E0F1_USTMA
biological_process	GO:0032007	negative regulation of TOR signaling	1	5	0.2	0.458112	0.860014	1	1	A0A0D1CD33_USTMA
molecular_function	GO:0005460	UDP-glucose transmembrane transporter activity	1	1	1	1	0.23441	1	1	HUT1_USTMA
biological_process	GO:0072334	UDP-galactose transmembrane transport	1	1	1	1	0.244689	1	1	HUT1_USTMA
molecular_function	GO:0003921	GMP synthase activity	1	1	1	1	0.23441	1	1	GUAA_USTMA
molecular_function	GO:0016462	pyrophosphatase activity	1	1	1	0.601809	0.471977	1	1	GUAA_USTMA
biological_process	GO:0006177	GMP biosynthetic process	1	2	0.5	0.849758	0.569212	1	1	GUAA_USTMA
molecular_function	GO:0004017	adenylate kinase activity	1	4	0.25	0.764358	0.656609	1	1	A0A0D1CGU1_USTMA
biological_process	GO:0006172	ADP biosynthetic process	1	2	0.5	0.940177	0.429556	1	1	A0A0D1CGU1_USTMA
biological_process	GO:0046033	AMP metabolic process	1	3	0.333333	0.767502	0.541888	1	1	A0A0D1CGU1_USTMA
biological_process	GO:0032958	inositol phosphate biosynthetic process	1	4	0.25	0.74727	0.674707	1	1	A0A0D1E9A4_USTMA
biological_process	GO:0007020	microtubule nucleation	1	7	0.142857	0.380209	0.894332	1	1	A0A0D1BZI3_USTMA
biological_process	GO:0006481	C-terminal protein methylation	1	3	0.333333	0.849758	0.569212	1	1	A0A0D1CAQ9_USTMA
molecular_function	GO:0017150	tRNA dihydrouridine synthase activity	1	5	0.2	0.665686	0.737183	1	1	A0A0D1CX43_USTMA
cellular_component	GO:0030956	glutamyl-tRNA(Gln) amidotransferase complex	1	2	0.5	0.946909	0.407925	1	1	GATA_USTMA
molecular_function	GO:0050567	glutaminyl-tRNA synthase (glutamine-hydrolyzing) activity	1	2	0.5	0.945096	0.413916	1	1	GATA_USTMA
biological_process	GO:0070681	glutaminyl-tRNAGln biosynthesis via transamidation	1	2	0.5	0.940177	0.429556	1	1	GATA_USTMA
molecular_function	GO:0004016	adenylate cyclase activity	1	1	1	1	0.23441	1	1	CYAA_USTMA
biological_process	GO:0007188	adenylate cyclase-modulating G protein-coupled receptor signaling pathway	1	2	0.5	0.74727	0.674707	1	1	CYAA_USTMA
biological_process	GO:0006171	cAMP biosynthetic process	1	1	1	1	0.244689	1	1	CYAA_USTMA
biological_process	GO:0009267	cellular response to starvation	1	7	0.142857	0.148589	0.938365	1	1	A0A0D1E914_USTMA
biological_process	GO:0006094	gluconeogenesis	1	11	0.0909091	0.13525	0.974137	1	1	A0A0D1E588_USTMA
molecular_function	GO:0004708	MAP kinase kinase activity	1	3	0.333333	0.860987	0.551367	1	1	A0A0D1DW86_USTMA
molecular_function	GO:0004714	transmembrane receptor protein tyrosine kinase activity	1	2	0.5	0.945096	0.413916	1	1	A0A0D1CL71_USTMA
biological_process	GO:0000187	obsolete activation of MAPK activity	1	3	0.333333	0.849758	0.569212	1	1	A0A0D1DW86_USTMA
biological_process	GO:0006006	glucose metabolic process	1	6	0.166667	0.0616348	0.981085	1	1	A0A0D1CBM5_USTMA
molecular_function	GO:0004707	MAP kinase activity	1	5	0.2	0.665686	0.737183	1	1	A0A0D1BUB7_USTMA
biological_process	GO:0006166	purine ribonucleoside salvage	1	3	0.333333	0.849758	0.569212	1	1	A0A0D1EDZ5_USTMA
cellular_component	GO:0005902	microvillus	1	1	1	1	0.230508	1	1	MYO1_USTMA
cellular_component	GO:0031982	vesicle	1	3	0.333333	0.998637	0.0023884	1	0.272	MYO1_USTMA
molecular_function	GO:0000146	microfilament motor activity	1	2	0.5	0.945096	0.413916	1	1	MYO1_USTMA
biological_process	GO:0030050	vesicle transport along actin filament	1	2	0.5	0.940177	0.429556	1	1	MYO1_USTMA
cellular_component	GO:0031901	early endosome membrane	1	2	0.5	0.946909	0.407925	1	1	SNX3_USTMA
molecular_function	GO:0019706	protein-cysteine S-palmitoyltransferase activity	1	7	0.142857	0.484441	0.846083	1	1	A0A0D1DSD4_USTMA
biological_process	GO:0044804	autophagy of nucleus	1	6	0.166667	0.873451	0.264071	1	1	A0A0D1DRV9_USTMA
biological_process	GO:0006497	protein lipidation	1	3	0.333333	0.54309	0.607414	1	1	A0A0D1DRV9_USTMA
biological_process	GO:0002143	tRNA wobble position uridine thiolation	1	5	0.2	0.644019	0.754388	1	1	A0A0D1E0S3_USTMA
biological_process	GO:0070096	mitochondrial outer membrane translocase complex assembly	1	5	0.2	0.644019	0.754388	1	1	MDM12_USTMA
biological_process	GO:0045040	protein insertion into mitochondrial outer membrane	1	7	0.142857	0.458112	0.860014	1	1	MDM12_USTMA
molecular_function	GO:0003958	NADPH-hemoprotein reductase activity	1	2	0.5	0.945096	0.413916	1	1	A0A0D1CA24_USTMA
biological_process	GO:0032366	intracellular sterol transport	1	2	0.5	0.940177	0.429556	1	1	A0A0D1CXV0_USTMA
cellular_component	GO:0010494	cytoplasmic stress granule	1	7	0.142857	0.494597	0.840498	1	1	A0A0D1DZ34_USTMA
biological_process	GO:0006297	nucleotide-excision repair, DNA gap filling	1	3	0.333333	0.849758	0.569212	1	1	A0A0D1DX67_USTMA
cellular_component	GO:0017177	glucosidase II complex	1	2	0.5	0.946909	0.407925	1	1	A0A0D1DU09_USTMA
cellular_component	GO:0031011	Ino80 complex	1	9	0.111111	0.349329	0.905659	1	1	A0A0D1C0V7_USTMA
biological_process	GO:0007186	G protein-coupled receptor signaling pathway	1	8	0.125	0.348472	0.86475	1	1	A0A0D1DTD9_USTMA
cellular_component	GO:0016607	nuclear speck	1	6	0.166667	0.580683	0.792627	1	1	A0A0D1DZK7_USTMA
molecular_function	GO:0004322	ferroxidase activity	1	2	0.5	0.945096	0.413916	1	1	A0A0D1CKH5_USTMA
biological_process	GO:0033215	reductive iron assimilation	1	4	0.25	0.74727	0.674707	1	1	A0A0D1E0K7_USTMA
cellular_component	GO:0005656	nuclear pre-replicative complex	1	4	0.25	0.770771	0.649549	1	1	IPI3_USTMA
cellular_component	GO:0097344	Rix1 complex	1	2	0.5	0.946909	0.407925	1	1	IPI3_USTMA
biological_process	GO:0030174	regulation of DNA-dependent DNA replication initiation	1	3	0.333333	0.74727	0.674707	1	1	IPI3_USTMA
biological_process	GO:0006915	apoptotic process	1	4	0.25	0.207878	0.954575	1	1	A0A0D1CCI7_USTMA
biological_process	GO:0070814	hydrogen sulfide biosynthetic process	1	6	0.166667	0.546509	0.814568	1	1	A0A0D1E0M3_USTMA
molecular_function	GO:0004379	glycylpeptide N-tetradecanoyltransferase activity	1	1	1	1	0.23441	1	1	NMT_USTMA
biological_process	GO:0018008	N-terminal peptidyl-glycine N-myristoylation	1	1	1	1	0.244689	1	1	NMT_USTMA
cellular_component	GO:0005732	sno(s)RNA-containing ribonucleoprotein complex	1	4	0.25	0.739386	0.454159	1	1	A0A0D1CPZ3_USTMA
biological_process	GO:0006559	L-phenylalanine catabolic process	1	4	0.25	0.74727	0.674707	1	1	A0A0D1CZ51_USTMA
biological_process	GO:0051085	chaperone cofactor-dependent protein refolding	1	9	0.111111	0.312961	0.920244	1	1	A0A0D1DT43_USTMA
cellular_component	GO:0005952	cAMP-dependent protein kinase complex	1	3	0.333333	0.865164	0.544469	1	1	A0A0D1E5D9_USTMA
molecular_function	GO:0004311	farnesyltranstransferase activity	1	2	0.5	0.860987	0.551367	1	1	A0A0D1CJ01_USTMA
biological_process	GO:0043504	mitochondrial DNA repair	1	5	0.2	0.644019	0.754388	1	1	MSH3_USTMA
biological_process	GO:0018230	peptidyl-L-cysteine S-palmitoylation	1	7	0.142857	0.458112	0.860014	1	1	A0A0D1DSD4_USTMA
biological_process	GO:1901407	regulation of phosphorylation of RNA polymerase II C-terminal domain	1	1	1	1	0.244689	1	1	PPIL4_USTMA
biological_process	GO:0030150	protein import into mitochondrial matrix	1	14	0.0714286	0.10842	0.980488	1	1	TIM50_USTMA
molecular_function	GO:0032452	histone demethylase activity	1	4	0.25	0.764358	0.656609	1	1	A0A0D1BWW9_USTMA
molecular_function	GO:0051864	histone H3-methyl-lysine-36 demethylase activity	1	2	0.5	0.945096	0.413916	1	1	A0A0D1BWW9_USTMA
cellular_component	GO:0009316	3-isopropylmalate dehydratase complex	1	1	1	1	0.230508	1	1	LEUC_USTMA
molecular_function	GO:0003861	3-isopropylmalate dehydratase activity	1	1	1	1	0.23441	1	1	LEUC_USTMA
biological_process	GO:0009082	branched-chain amino acid biosynthetic process	1	8	0.125	0.13525	0.974137	1	1	LEUC_USTMA
biological_process	GO:0009098	leucine biosynthetic process	1	6	0.166667	0.546509	0.814568	1	1	LEUC_USTMA
biological_process	GO:0000725	recombinational repair	1	3	0.333333	0.999058	0.00251116	1	0.655	A0A0D1E7Z9_USTMA
biological_process	GO:0032259	methylation	1	18	0.0555556	0.162288	0.898718	1	1	A0A0D1C5V4_USTMA
biological_process	GO:0009228	thiamine biosynthetic process	1	4	0.25	0.74727	0.674707	1	1	A0A0D1DY58_USTMA
molecular_function	GO:0004185	serine-type carboxypeptidase activity	1	6	0.166667	0.571232	0.798866	1	1	A0A0D1CWG3_USTMA
molecular_function	GO:0005199	structural constituent of cell wall	1	3	0.333333	0.860987	0.551367	1	1	A0A0D1CKI0_USTMA
biological_process	GO:0000492	box C/D snoRNP assembly	1	4	0.25	0.74727	0.674707	1	1	A0A0D1CUN7_USTMA
cellular_component	GO:0005685	U1 snRNP	1	13	0.0769231	0.161877	0.967025	1	1	A0A0D1BXS7_USTMA
cellular_component	GO:0071011	precatalytic spliceosome	1	17	0.0588235	0.0704362	0.988488	0.998	1	A0A0D1BXS7_USTMA
molecular_function	GO:0030621	U4 snRNA binding	1	2	0.5	0.945096	0.413916	1	1	A0A0D1CHJ8_USTMA
molecular_function	GO:0008173	RNA methyltransferase activity	1	5	0.2	0.134249	0.945185	1	1	A0A0D1CBR1_USTMA
biological_process	GO:0031167	rRNA methylation	1	5	0.2	0.168053	0.965723	1	1	A0A0D1DXE3_USTMA
cellular_component	GO:0030904	retromer complex	1	4	0.25	0.91609	0.326108	1	1	SNX3_USTMA
biological_process	GO:0034499	late endosome to Golgi transport	1	1	1	1	0.244689	1	1	SNX3_USTMA
cellular_component	GO:0005744	TIM23 mitochondrial import inner membrane translocase complex	1	6	0.166667	0.349329	0.905659	1	1	TIM50_USTMA
molecular_function	GO:0048039	ubiquinone binding	1	4	0.25	0.764358	0.656609	1	1	A0A0D1BWP5_USTMA
biological_process	GO:0010142	farnesyl diphosphate biosynthetic process, mevalonate pathway	1	2	0.5	0.940177	0.429556	1	1	A0A0D1EDT9_USTMA
cellular_component	GO:0000439	transcription factor TFIIH core complex	1	6	0.166667	0.580683	0.792627	1	1	A0A0D1E4P9_USTMA
cellular_component	GO:0005675	transcription factor TFIIH holo complex	1	7	0.142857	0.655219	0.650671	1	1	A0A0D1E4P9_USTMA
cellular_component	GO:0072380	TRC complex	1	3	0.333333	0.865164	0.544469	1	1	A0A0D1DT43_USTMA
biological_process	GO:0009408	response to heat	1	6	0.166667	0.541513	0.744177	1	1	A0A0D1DU35_USTMA
molecular_function	GO:0005034	osmosensor activity	1	2	0.5	0.945096	0.413916	1	1	A0A0D1E8D6_USTMA
biological_process	GO:0048315	conidium formation	1	1	1	1	0.244689	1	1	STUA_USTMA
cellular_component	GO:0005815	microtubule organizing center	1	5	0.2	0.843611	0.272819	1	1	STU1_USTMA
biological_process	GO:0007006	mitochondrial membrane organization	1	2	0.5	0.492004	0.697417	1	1	A0A0D1C5I7_USTMA
biological_process	GO:0070863	positive regulation of protein exit from endoplasmic reticulum	1	2	0.5	0.940177	0.429556	1	1	A0A0D1C766_USTMA
biological_process	GO:0016050	vesicle organization	1	3	0.333333	0.855586	0.235602	1	1	A0A0D1DPL8_USTMA
molecular_function	GO:0016846	carbon-sulfur lyase activity	1	6	0.166667	0.339072	0.909887	1	1	A0A0D1E6L6_USTMA
biological_process	GO:0019346	transsulfuration	1	8	0.125	0.380209	0.894332	1	1	A0A0D1E0M3_USTMA
biological_process	GO:0019432	triglyceride biosynthetic process	1	6	0.166667	0.546509	0.814568	1	1	A0A0D1E978_USTMA
biological_process	GO:0006538	glutamate catabolic process	1	2	0.5	0.849758	0.569212	1	1	A0A0D1DTH0_USTMA
biological_process	GO:0006865	amino acid transport	1	8	0.125	0.0326196	0.989545	0.999	1	A0A0D1E381_USTMA
molecular_function	GO:0016614	oxidoreductase activity, acting on CH-OH group of donors	1	9	0.111111	2.00444e-06	1	0	1	A0A0D1C2K9_USTMA
molecular_function	GO:0015616	DNA translocase activity	1	3	0.333333	0.860987	0.551367	1	1	A0A0D1C335_USTMA
biological_process	GO:0045003	double-strand break repair via synthesis-dependent strand annealing	1	2	0.5	0.902147	0.355981	1	1	A0A0D1CX99_USTMA
molecular_function	GO:0047834	D-threo-aldose 1-dehydrogenase activity	1	15	0.0666667	0.101328	0.981949	1	1	A0A0D1CS00_USTMA
cellular_component	GO:0005637	nuclear inner membrane	1	4	0.25	0.673892	0.730409	1	1	A0A0D1D1W6_USTMA
biological_process	GO:0071712	ER-associated misfolded protein catabolic process	1	6	0.166667	0.546509	0.814568	1	1	A0A0D1CAH9_USTMA
cellular_component	GO:0005965	protein farnesyltransferase complex	1	2	0.5	0.946909	0.407925	1	1	A0A0D1DPI2_USTMA
molecular_function	GO:0004660	protein farnesyltransferase activity	1	1	1	1	0.23441	1	1	A0A0D1DPI2_USTMA
biological_process	GO:0018343	protein farnesylation	1	2	0.5	0.940177	0.429556	1	1	A0A0D1DPI2_USTMA
biological_process	GO:0018342	protein prenylation	1	3	0.333333	0.83904	0.453491	1	1	A0A0D1DPI2_USTMA
biological_process	GO:0016558	protein import into peroxisome matrix	1	6	0.166667	0.894042	0.27198	1	1	A0A0D1C902_USTMA
cellular_component	GO:0000923	equatorial microtubule organizing center	1	5	0.2	0.673892	0.730409	1	1	A0A0D1BZI3_USTMA
cellular_component	GO:0000930	gamma-tubulin complex	1	6	0.166667	0.494597	0.840498	1	1	A0A0D1BZI3_USTMA
molecular_function	GO:0043015	gamma-tubulin binding	1	5	0.2	0.665686	0.737183	1	1	A0A0D1BZI3_USTMA
biological_process	GO:0051225	spindle assembly	1	6	0.166667	0.757273	0.459976	1	1	A0A0D1BZI3_USTMA
cellular_component	GO:0031224	intrinsic component of membrane	1	18	0.0555556	8.07265e-05	0.999942	0.004	1	A0A0D1E2F7_USTMA
molecular_function	GO:0004758	serine C-palmitoyltransferase activity	1	2	0.5	0.945096	0.413916	1	1	A0A0D1DXU0_USTMA
biological_process	GO:0046513	ceramide biosynthetic process	1	7	0.142857	0.615577	0.687039	1	1	A0A0D1DXU0_USTMA
biological_process	GO:0006816	calcium ion transport	1	2	0.5	0.824583	0.350595	1	1	A0A0D1DRC6_USTMA
biological_process	GO:0043484	regulation of RNA splicing	1	1	1	0.767502	0.541888	1	1	A0A0D1C0T4_USTMA
molecular_function	GO:0015131	oxaloacetate transmembrane transporter activity	1	3	0.333333	0.860987	0.551367	1	1	A0A0D1CNB0_USTMA
molecular_function	GO:0015116	sulfate transmembrane transporter activity	1	4	0.25	0.912366	0.334314	1	1	A0A0D1CNB0_USTMA
cellular_component	GO:0008250	oligosaccharyltransferase complex	1	7	0.142857	0.417305	0.877327	1	1	A0A0D1C1H1_USTMA
biological_process	GO:0051666	actin cortical patch localization	1	8	0.125	0.380209	0.894332	1	1	A0A0D1E233_USTMA
biological_process	GO:0034164	negative regulation of toll-like receptor 9 signaling pathway	1	2	0.5	0.940177	0.429556	1	1	A0A0D1CCI7_USTMA
biological_process	GO:0043280	positive regulation of cysteine-type endopeptidase activity involved in apoptotic process	1	2	0.5	0.940177	0.429556	1	1	A0A0D1CCI7_USTMA
biological_process	GO:0010257	NADH dehydrogenase complex assembly	1	2	0.5	0.250203	0.913393	1	1	A0A0D1CBQ6_USTMA
molecular_function	GO:0000014	single-stranded DNA endodeoxyribonuclease activity	1	3	0.333333	0.860987	0.551367	1	1	A0A0D1BXI7_USTMA
biological_process	GO:0050821	protein stabilization	1	7	0.142857	0.458112	0.860014	1	1	A0A0D1DYY3_USTMA
molecular_function	GO:0022841	potassium ion leak channel activity	1	1	1	1	0.23441	1	1	A0A0D1DP15_USTMA
biological_process	GO:0071805	potassium ion transmembrane transport	1	2	0.5	0.996433	0.0477544	1	1	A0A0D1DP15_USTMA
biological_process	GO:0030322	stabilization of membrane potential	1	1	1	1	0.244689	1	1	A0A0D1DP15_USTMA
biological_process	GO:0009820	alkaloid metabolic process	1	2	0.5	0.940177	0.429556	1	1	A0A0D1CCL3_USTMA
biological_process	GO:0009272	fungal-type cell wall biogenesis	1	6	0.166667	0.13525	0.974137	1	1	A0A0D1DRE2_USTMA
biological_process	GO:0000435	positive regulation of transcription from RNA polymerase II promoter by galactose	1	2	0.5	0.940177	0.429556	1	1	A0A0D1CNA7_USTMA
biological_process	GO:0019240	citrulline biosynthetic process	1	3	0.333333	0.849758	0.569212	1	1	A0A0D1DTC4_USTMA
cellular_component	GO:0070860	RNA polymerase I core factor complex	1	1	1	1	0.230508	1	1	A0A0D1E5A6_USTMA
cellular_component	GO:0005668	RNA polymerase transcription factor SL1 complex	1	1	1	1	0.230508	1	1	A0A0D1E5A6_USTMA
molecular_function	GO:0001164	RNA polymerase I core promoter sequence-specific DNA binding	1	1	1	1	0.23441	1	1	A0A0D1E5A6_USTMA
molecular_function	GO:0042602	riboflavin reductase (NADPH) activity	1	1	1	1	0.23441	1	1	A0A0D1BV38_USTMA
molecular_function	GO:0004816	asparagine-tRNA ligase activity	1	2	0.5	0.945096	0.413916	1	1	A0A0D1DXU9_USTMA
biological_process	GO:0006421	asparaginyl-tRNA aminoacylation	1	2	0.5	0.940177	0.429556	1	1	A0A0D1DXU9_USTMA
cellular_component	GO:0030126	COPI vesicle coat	1	7	0.142857	0.494597	0.840498	1	1	A0A0D1E930_USTMA
molecular_function	GO:0015171	amino acid transmembrane transporter activity	1	18	0.0555556	0.045814	0.986551	0.997	1	A0A0D1E6U1_USTMA
biological_process	GO:0003333	amino acid transmembrane transport	1	17	0.0588235	0.105841	0.964015	1	1	A0A0D1E6U1_USTMA
molecular_function	GO:0030332	cyclin binding	1	5	0.2	0.665686	0.737183	1	1	A0A0D1DYQ5_USTMA
cellular_component	GO:0042995	cell projection	1	6	0.166667	0.782057	0.403226	1	1	A0A0D1E0C2_USTMA
biological_process	GO:0007163	establishment or maintenance of cell polarity	1	6	0.166667	0.886924	0.207278	1	1	A0A0D1DYV9_USTMA
cellular_component	GO:0044695	Dsc E3 ubiquitin ligase complex	1	3	0.333333	0.865164	0.544469	1	1	A0A0D1CLA5_USTMA
biological_process	GO:0035103	sterol regulatory element binding protein cleavage	1	1	1	1	0.244689	1	1	A0A0D1CLA5_USTMA
cellular_component	GO:0005811	lipid droplet	1	11	0.0909091	0.24018	0.944216	1	1	A0A0D1CIJ0_USTMA
cellular_component	GO:0016471	vacuolar proton-transporting V-type ATPase complex	1	4	0.25	0.494597	0.840498	1	1	A0A0D1DTV7_USTMA
molecular_function	GO:0046961	proton-transporting ATPase activity, rotational mechanism	1	13	0.0769231	0.154169	0.96914	1	1	A0A0D1BW64_USTMA
biological_process	GO:0007035	vacuolar acidification	1	7	0.142857	0.458112	0.860014	1	1	A0A0D1D1V5_USTMA
molecular_function	GO:0003691	double-stranded telomeric DNA binding	1	2	0.5	0.945096	0.413916	1	1	A0A0D1CTG7_USTMA
cellular_component	GO:0034657	GID complex	1	3	0.333333	0.865164	0.544469	1	1	A0A0D1E340_USTMA
cellular_component	GO:0031461	cullin-RING ubiquitin ligase complex	1	5	0.2	0.902538	0.183174	1	1	A0A0D1C1Y1_USTMA
cellular_component	GO:0005844	polysome	1	9	0.111111	0.161877	0.967025	1	1	A0A0D1DXB8_USTMA
biological_process	GO:0042274	ribosomal small subunit biogenesis	1	7	0.142857	0.0261036	0.988507	0.997	1	A0A0D1DQJ5_USTMA
molecular_function	GO:0016702	oxidoreductase activity, acting on single donors with incorporation of molecular oxygen, incorporation of two atoms of oxygen	1	2	0.5	0.644346	0.660928	1	1	A0A0D1DTK7_USTMA
cellular_component	GO:0140453	protein aggregate center	1	2	0.5	0.946909	0.407925	1	1	A0A0D1DT43_USTMA
molecular_function	GO:0043531	ADP binding	1	3	0.333333	0.860987	0.551367	1	1	A0A0D1DT43_USTMA
biological_process	GO:0070370	cellular heat acclimation	1	2	0.5	0.940177	0.429556	1	1	A0A0D1DT43_USTMA
biological_process	GO:0034605	cellular response to heat	1	2	0.5	0.74727	0.674707	1	1	A0A0D1DT43_USTMA
biological_process	GO:0071218	cellular response to misfolded protein	1	2	0.5	0.72802	0.528427	1	1	A0A0D1DT43_USTMA
biological_process	GO:0043335	protein unfolding	1	1	1	1	0.244689	1	1	A0A0D1DT43_USTMA
biological_process	GO:0035617	stress granule disassembly	1	1	1	1	0.244689	1	1	A0A0D1DT43_USTMA
biological_process	GO:0070414	trehalose metabolism in response to heat stress	1	1	1	1	0.244689	1	1	A0A0D1DT43_USTMA
biological_process	GO:0055129	L-proline biosynthetic process	1	3	0.333333	0.849758	0.569212	1	1	A0A0D1D180_USTMA
molecular_function	GO:0140326	ATPase-coupled intramembrane lipid transporter activity	1	4	0.25	0.764358	0.656609	1	1	A0A0D1C917_USTMA
molecular_function	GO:0030276	clathrin binding	1	5	0.2	0.737034	0.481645	1	1	A0A0D1DY37_USTMA
cellular_component	GO:0005884	actin filament	1	3	0.333333	0.865164	0.544469	1	1	A0A0D1C868_USTMA
molecular_function	GO:0003785	actin monomer binding	1	2	0.5	0.945096	0.413916	1	1	A0A0D1C868_USTMA
biological_process	GO:0051016	barbed-end actin filament capping	1	3	0.333333	0.849758	0.569212	1	1	A0A0D1C868_USTMA
biological_process	GO:0042989	sequestering of actin monomers	1	2	0.5	0.940177	0.429556	1	1	A0A0D1C868_USTMA
cellular_component	GO:0005682	U5 snRNP	1	10	0.1	0.290486	0.927453	1	1	A0A0D1BXS7_USTMA
biological_process	GO:0000423	mitophagy	1	1	1	1	0.244689	1	1	A0A0D1CUV6_USTMA
biological_process	GO:0006520	cellular amino acid metabolic process	1	2	0.5	0.00658126	0.996274	0.74	1	A0A0D1CG70_USTMA
biological_process	GO:0000056	ribosomal small subunit export from nucleus	1	4	0.25	0.74727	0.674707	1	1	A0A0D1E7Q3_USTMA
biological_process	GO:0051304	chromosome separation	1	1	1	0.954754	0.100062	1	1	A0A0D1DPJ8_USTMA
biological_process	GO:0033316	meiotic spindle assembly checkpoint signaling	1	1	1	1	0.244689	1	1	A0A0D1DPJ8_USTMA
molecular_function	GO:0019903	protein phosphatase binding	1	1	1	0.957617	0.235642	1	1	A0A0D1CQ20_USTMA
biological_process	GO:0043666	regulation of phosphoprotein phosphatase activity	1	3	0.333333	0.83904	0.453491	1	1	A0A0D1CQ20_USTMA
biological_process	GO:0015677	copper ion import	1	5	0.2	0.644019	0.754388	1	1	A0A0D1E5G0_USTMA
biological_process	GO:0006826	iron ion transport	1	6	0.166667	0.757273	0.459976	1	1	A0A0D1E5G0_USTMA
biological_process	GO:0070131	positive regulation of mitochondrial translation	1	2	0.5	0.940177	0.429556	1	1	A0A0D1CLY8_USTMA
biological_process	GO:0006486	protein glycosylation	1	8	0.125	0.0701928	0.966668	1	1	A0A0D1CLF4_USTMA
biological_process	GO:0018022	peptidyl-lysine methylation	1	5	0.2	0.873451	0.264071	1	1	A0A0D1CWG8_USTMA
biological_process	GO:0046855	inositol phosphate dephosphorylation	1	7	0.142857	0.458112	0.860014	1	1	A0A0D1E5P2_USTMA
cellular_component	GO:0000136	mannan polymerase complex	1	1	1	1	0.230508	1	1	A0A0D1E064_USTMA
biological_process	GO:0031204	posttranslational protein targeting to membrane, translocation	1	6	0.166667	0.458112	0.860014	1	1	A0A0D1C6D2_USTMA
biological_process	GO:0051315	attachment of mitotic spindle microtubules to kinetochore	1	5	0.2	0.691822	0.619791	1	1	A0A0D1DTE9_USTMA
cellular_component	GO:0042555	MCM complex	1	6	0.166667	0.580683	0.792627	1	1	A0A0D1E418_USTMA
biological_process	GO:0006267	pre-replicative complex assembly involved in nuclear cell cycle DNA replication	1	7	0.142857	0.458112	0.860014	1	1	A0A0D1E418_USTMA
biological_process	GO:1990683	DNA double-strand break attachment to nuclear envelope	1	1	1	1	0.244689	1	1	A0A0D1CM71_USTMA
biological_process	GO:0033962	P-body assembly	1	6	0.166667	0.767502	0.541888	1	1	A0A0D1DW69_USTMA
biological_process	GO:0034063	stress granule assembly	1	3	0.333333	0.849758	0.569212	1	1	A0A0D1DZ34_USTMA
molecular_function	GO:0017022	myosin binding	1	3	0.333333	0.764358	0.656609	1	1	A0A0D1BWM3_USTMA
cellular_component	GO:0042765	GPI-anchor transamidase complex	1	5	0.2	0.673892	0.730409	1	1	A0A0D1E3M3_USTMA
biological_process	GO:0016255	attachment of GPI anchor to protein	1	4	0.25	0.74727	0.674707	1	1	A0A0D1E3M3_USTMA
biological_process	GO:0055088	lipid homeostasis	1	12	0.0833333	0.13525	0.974137	1	1	A0A0D1CWP0_USTMA
biological_process	GO:0009229	thiamine diphosphate biosynthetic process	1	3	0.333333	0.849758	0.569212	1	1	A0A0D1CNX0_USTMA
biological_process	GO:0002926	tRNA wobble base 5-methoxycarbonylmethyl-2-thiouridinylation	1	2	0.5	0.940177	0.429556	1	1	A0A0D1CXX4_USTMA
cellular_component	GO:0005947	mitochondrial alpha-ketoglutarate dehydrogenase complex	1	2	0.5	0.865164	0.544469	1	1	A0A0D1CIW9_USTMA
molecular_function	GO:0003863	3-methyl-2-oxobutanoate dehydrogenase (2-methylpropanoyl-transferring) activity	1	1	1	1	0.23441	1	1	A0A0D1CIW9_USTMA
biological_process	GO:0009083	branched-chain amino acid catabolic process	1	3	0.333333	0.849758	0.569212	1	1	A0A0D1CIW9_USTMA
cellular_component	GO:0030122	AP-2 adaptor complex	1	3	0.333333	0.865164	0.544469	1	1	A0A0D1CEI5_USTMA
molecular_function	GO:0008120	ceramide glucosyltransferase activity	1	1	1	1	0.23441	1	1	A0A0D1DUE7_USTMA
molecular_function	GO:0102769	dihydroceramide glucosyltransferase activity	1	1	1	1	0.23441	1	1	A0A0D1DUE7_USTMA
biological_process	GO:0006679	glucosylceramide biosynthetic process	1	1	1	1	0.244689	1	1	A0A0D1DUE7_USTMA
cellular_component	GO:0032299	ribonuclease H2 complex	1	3	0.333333	0.865164	0.544469	1	1	A0A0D1DQ00_USTMA
molecular_function	GO:0004523	RNA-DNA hybrid ribonuclease activity	1	5	0.2	0.665686	0.737183	1	1	A0A0D1DQ00_USTMA
biological_process	GO:0045893	positive regulation of transcription, DNA-templated	1	6	0.166667	0.761472	0.324226	1	1	A0A0D1ED63_USTMA
biological_process	GO:1902975	mitotic DNA replication initiation	1	5	0.2	0.546509	0.814568	1	1	A0A0D1E418_USTMA
biological_process	GO:0006106	fumarate metabolic process	1	3	0.333333	0.952246	0.25273	1	1	A0A0D1E945_USTMA
biological_process	GO:0030968	endoplasmic reticulum unfolded protein response	1	10	0.1	0.207878	0.954575	1	1	A0A0D1DQM9_USTMA
cellular_component	GO:0005673	transcription factor TFIIE complex	1	2	0.5	0.946909	0.407925	1	1	A0A0D1E6I9_USTMA
molecular_function	GO:0000107	imidazoleglycerol-phosphate synthase activity	1	1	1	1	0.23441	1	1	A0A0D1C3H6_USTMA
molecular_function	GO:0016833	oxo-acid-lyase activity	1	1	1	0.484441	0.846083	1	1	A0A0D1C3H6_USTMA
biological_process	GO:0000105	histidine biosynthetic process	1	7	0.142857	0.458112	0.860014	1	1	A0A0D1C3H6_USTMA
biological_process	GO:0006400	tRNA modification	1	6	0.166667	0.511391	0.623774	1	1	A0A0D1CG54_USTMA
biological_process	GO:0045930	negative regulation of mitotic cell cycle	1	1	1	0.957021	0.092484	1	1	A0A0D1CRI1_USTMA
cellular_component	GO:0031416	NatB complex	1	2	0.5	0.946909	0.407925	1	1	A0A0D1BV65_USTMA
cellular_component	GO:1990221	L-cysteine desulfurase complex	1	1	1	1	0.230508	1	1	A0A0D1E1R3_USTMA
cellular_component	GO:0072546	EMC complex	1	8	0.125	0.417305	0.877327	1	1	A0A0D1E1X3_USTMA
biological_process	GO:1902600	proton transmembrane transport	1	8	0.125	0.00621257	0.998927	0.693	1	A0A0D1DTV7_USTMA
molecular_function	GO:0015267	channel activity	1	3	0.333333	0.927872	0.136184	1	1	A0A0D1CWK3_USTMA
molecular_function	GO:0051747	cytosine C-5 DNA demethylase activity	1	1	1	1	0.23441	1	1	A0A0D1CZM5_USTMA
molecular_function	GO:0043734	DNA-N1-methyladenine dioxygenase activity	1	1	1	1	0.23441	1	1	A0A0D1CZM5_USTMA
biological_process	GO:0006307	DNA dealkylation involved in DNA repair	1	2	0.5	0.940177	0.429556	1	1	A0A0D1CZM5_USTMA
biological_process	GO:0035511	oxidative DNA demethylation	1	1	1	1	0.244689	1	1	A0A0D1CZM5_USTMA
molecular_function	GO:0034986	iron chaperone activity	1	1	1	1	0.23441	1	1	A0A0D1CKH5_USTMA
biological_process	GO:0018283	iron incorporation into metallo-sulfur cluster	1	1	1	1	0.244689	1	1	A0A0D1CKH5_USTMA
cellular_component	GO:0005845	mRNA cap binding complex	1	3	0.333333	0.865164	0.544469	1	1	A0A0D1DTA6_USTMA
molecular_function	GO:0010436	carotenoid dioxygenase activity	1	2	0.5	0.945096	0.413916	1	1	A0A0D1E9J4_USTMA
biological_process	GO:0016121	carotene catabolic process	1	2	0.5	0.940177	0.429556	1	1	A0A0D1E9J4_USTMA
cellular_component	GO:0005840	ribosome	1	22	0.0454545	8.82014e-09	1	0	1	A0A0D1E2C6_USTMA
biological_process	GO:0030261	chromosome condensation	1	3	0.333333	0.665292	0.592999	1	1	A0A0D1DNV3_USTMA
biological_process	GO:0031936	obsolete negative regulation of chromatin silencing	1	3	0.333333	0.644019	0.754388	1	1	A0A0D1C149_USTMA
biological_process	GO:0045910	negative regulation of DNA recombination	1	4	0.25	0.644019	0.754388	1	1	A0A0D1CQ83_USTMA
biological_process	GO:0006725	cellular aromatic compound metabolic process	1	3	0.333333	0.82541	0.196137	1	1	A0A0D1DTK7_USTMA
molecular_function	GO:0004029	aldehyde dehydrogenase (NAD+) activity	1	8	0.125	0.40691	0.882225	1	1	A0A0D1DX65_USTMA
biological_process	GO:0031106	septin ring organization	1	1	1	0.849758	0.569212	1	1	A0A0D1CTU4_USTMA
cellular_component	GO:0070985	transcription factor TFIIK complex	1	2	0.5	0.946909	0.407925	1	1	A0A0D1CUI2_USTMA
biological_process	GO:0071619	phosphorylation of RNA polymerase II C-terminal domain serine 2 residues	1	2	0.5	0.940177	0.429556	1	1	A0A0D1ECQ1_USTMA
biological_process	GO:0019985	translesion synthesis	1	3	0.333333	0.955293	0.155688	1	1	A0A0D1C3I0_USTMA
molecular_function	GO:0046933	proton-transporting ATP synthase activity, rotational mechanism	1	9	0.111111	0.339072	0.909887	1	1	A0A0D1BW64_USTMA
cellular_component	GO:0000131	incipient cellular bud site	1	2	0.5	0.946909	0.407925	1	1	A0A0D1BZG9_USTMA
molecular_function	GO:0019829	ATPase-coupled cation transmembrane transporter activity	1	6	0.166667	0.366479	0.794045	1	1	A0A0D1CH16_USTMA
molecular_function	GO:0005388	P-type calcium transporter activity	1	5	0.2	0.665686	0.737183	1	1	A0A0D1DSP1_USTMA
molecular_function	GO:0008271	secondary active sulfate transmembrane transporter activity	1	2	0.5	0.945096	0.413916	1	1	A0A0D1DX85_USTMA
cellular_component	GO:0071513	phosphopantothenoylcysteine decarboxylase complex	1	1	1	1	0.230508	1	1	A0A0D1DP09_USTMA
molecular_function	GO:0004633	phosphopantothenoylcysteine decarboxylase activity	1	1	1	1	0.23441	1	1	A0A0D1DP09_USTMA
molecular_function	GO:0008126	acetylesterase activity	1	1	1	1	0.23441	1	1	A0A0D1C7F5_USTMA
molecular_function	GO:0047372	acylglycerol lipase activity	1	3	0.333333	0.860987	0.551367	1	1	A0A0D1C7F5_USTMA
molecular_function	GO:0034338	short-chain carboxylesterase activity	1	1	1	1	0.23441	1	1	A0A0D1C7F5_USTMA
biological_process	GO:0051792	medium-chain fatty acid biosynthetic process	1	1	1	1	0.244689	1	1	A0A0D1C7F5_USTMA
biological_process	GO:0051793	medium-chain fatty acid catabolic process	1	2	0.5	0.940177	0.429556	1	1	A0A0D1C7F5_USTMA
biological_process	GO:0030163	protein catabolic process	1	5	0.2	0.902721	0.129609	1	1	A0A0D1DQ65_USTMA
cellular_component	GO:0043564	Ku70:Ku80 complex	1	2	0.5	0.946909	0.407925	1	1	A0A0D1DRI5_USTMA
biological_process	GO:0071480	cellular response to gamma radiation	1	2	0.5	0.940177	0.429556	1	1	A0A0D1DRI5_USTMA
biological_process	GO:0071481	cellular response to X-ray	1	2	0.5	0.940177	0.429556	1	1	A0A0D1DRI5_USTMA
biological_process	GO:0006875	cellular metal ion homeostasis	1	1	1	0.74544	0.362334	1	1	A0A0D1DYS1_USTMA
biological_process	GO:0045013	carbon catabolite repression of transcription	1	1	1	0.74727	0.674707	1	1	A0A0D1C5B1_USTMA
cellular_component	GO:0071008	U2-type post-mRNA release spliceosomal complex	1	1	1	1	0.230508	1	1	A0A0D1DX30_USTMA
molecular_function	GO:0016620	oxidoreductase activity, acting on the aldehyde or oxo group of donors, NAD or NADP as acceptor	1	4	0.25	0.109146	0.962443	1	1	A0A0D1E0R5_USTMA
biological_process	GO:0031848	protection from non-homologous end joining at telomere	1	2	0.5	0.940177	0.429556	1	1	A0A0D1E8P9_USTMA
cellular_component	GO:0043291	RAVE complex	1	2	0.5	0.946909	0.407925	1	1	A0A0D1D1V5_USTMA
cellular_component	GO:0005839	proteasome core complex	1	14	0.0714286	0.132101	0.97465	1	1	A0A0D1DNX0_USTMA
cellular_component	GO:0019774	proteasome core complex, beta-subunit complex	1	3	0.333333	0.865164	0.544469	1	1	A0A0D1DNX0_USTMA
cellular_component	GO:0045025	mitochondrial degradosome	1	1	1	1	0.230508	1	1	A0A0D1DX75_USTMA
biological_process	GO:0000965	mitochondrial RNA 3'-end processing	1	1	1	1	0.244689	1	1	A0A0D1DX75_USTMA
cellular_component	GO:0070761	pre-snoRNP complex	1	1	1	1	0.230508	1	1	A0A0D1CUN7_USTMA
biological_process	GO:0048254	snoRNA localization	1	1	1	1	0.244689	1	1	A0A0D1CUN7_USTMA
biological_process	GO:0006405	RNA export from nucleus	1	5	0.2	0.963936	0.0731275	1	1	A0A0D1BVD0_USTMA
biological_process	GO:0000972	transcription-dependent tethering of RNA polymerase II gene DNA at nuclear periphery	1	3	0.333333	0.767502	0.541888	1	1	A0A0D1CQI6_USTMA
molecular_function	GO:0043047	single-stranded telomeric DNA binding	1	4	0.25	0.665686	0.737183	1	1	A0A0D1CUI6_USTMA
biological_process	GO:0010737	protein kinase A signaling	1	2	0.5	0.849758	0.569212	1	1	A0A0D1DSN0_USTMA
biological_process	GO:0045047	protein targeting to ER	1	7	0.142857	0.388374	0.793719	1	1	A0A0D1CIZ5_USTMA
biological_process	GO:0006465	signal peptide processing	1	8	0.125	0.380209	0.894332	1	1	A0A0D1DVZ7_USTMA
cellular_component	GO:0036396	RNA N6-methyladenosine methyltransferase complex	1	2	0.5	0.946909	0.407925	1	1	A0A0D1DZK7_USTMA
cellular_component	GO:0005666	RNA polymerase III complex	1	17	0.0588235	0.0704362	0.988488	0.998	1	A0A0D1CKL7_USTMA
molecular_function	GO:0001054	RNA polymerase I activity	1	4	0.25	0.764358	0.656609	1	1	A0A0D1CKL7_USTMA
molecular_function	GO:0001056	RNA polymerase III activity	1	6	0.166667	0.571232	0.798866	1	1	A0A0D1CKL7_USTMA
biological_process	GO:0042797	tRNA transcription by RNA polymerase III	1	7	0.142857	0.458112	0.860014	1	1	A0A0D1CKL7_USTMA
biological_process	GO:0006614	SRP-dependent cotranslational protein targeting to membrane	1	5	0.2	0.615577	0.687039	1	1	A0A0D1CDU8_USTMA
biological_process	GO:0071467	cellular response to pH	1	1	1	1	0.244689	1	1	A0A0D1CKC9_USTMA
biological_process	GO:0006032	chitin catabolic process	1	12	0.0833333	0.168053	0.965723	1	1	A0A0D1DT94_USTMA
biological_process	GO:0000272	polysaccharide catabolic process	1	15	0.0666667	0.612522	0.525603	1	1	A0A0D1DT94_USTMA
molecular_function	GO:0000319	sulfite transmembrane transporter activity	1	2	0.5	0.945096	0.413916	1	1	A0A0D1DT27_USTMA
biological_process	GO:0000316	sulfite transport	1	2	0.5	0.940177	0.429556	1	1	A0A0D1DT27_USTMA
biological_process	GO:0032979	protein insertion into mitochondrial inner membrane from matrix	1	3	0.333333	0.849758	0.569212	1	1	A0A0D1E6E5_USTMA
molecular_function	GO:0003997	acyl-CoA oxidase activity	1	5	0.2	0.665686	0.737183	1	1	A0A0D1CWP0_USTMA
molecular_function	GO:0005504	fatty acid binding	1	5	0.2	0.571232	0.798866	1	1	A0A0D1CWP0_USTMA
biological_process	GO:0033540	fatty acid beta-oxidation using acyl-CoA oxidase	1	5	0.2	0.644019	0.754388	1	1	A0A0D1CWP0_USTMA
biological_process	GO:0045143	homologous chromosome segregation	1	1	1	0.965254	0.16096	1	1	A0A0D1DYL5_USTMA
biological_process	GO:0006261	DNA-dependent DNA replication	1	10	0.1	0.857891	0.216848	1	1	A0A0D1C325_USTMA
molecular_function	GO:0004037	allantoicase activity	1	1	1	1	0.23441	1	1	A0A0D1E3U9_USTMA
molecular_function	GO:0004848	ureidoglycolate hydrolase activity	1	1	1	1	0.23441	1	1	A0A0D1E3U9_USTMA
molecular_function	GO:0050385	ureidoglycolate lyase activity	1	1	1	1	0.23441	1	1	A0A0D1E3U9_USTMA
biological_process	GO:0000256	allantoin catabolic process	1	1	1	1	0.244689	1	1	A0A0D1E3U9_USTMA
biological_process	GO:0007076	mitotic chromosome condensation	1	5	0.2	0.458112	0.860014	1	1	A0A0D1E1Y2_USTMA
cellular_component	GO:0032545	CURI complex	1	2	0.5	0.946909	0.407925	1	1	A0A0D1C533_USTMA
cellular_component	GO:0034456	UTP-C complex	1	4	0.25	0.770771	0.649549	1	1	A0A0D1C533_USTMA
biological_process	GO:0006384	transcription initiation from RNA polymerase III promoter	1	5	0.2	0.767502	0.541888	1	1	A0A0D1CJU8_USTMA
cellular_component	GO:0110085	mitotic actomyosin contractile ring	1	4	0.25	0.726473	0.582695	1	1	A0A0D1CIW0_USTMA
molecular_function	GO:1990050	phosphatidic acid transfer activity	1	2	0.5	0.945096	0.413916	1	1	A0A0D1E3G6_USTMA
molecular_function	GO:0000309	nicotinamide-nucleotide adenylyltransferase activity	1	2	0.5	0.945096	0.413916	1	1	A0A0D1CSJ5_USTMA
molecular_function	GO:0004515	nicotinate-nucleotide adenylyltransferase activity	1	1	1	1	0.23441	1	1	A0A0D1CSJ5_USTMA
molecular_function	GO:0016706	2-oxoglutarate-dependent dioxygenase activity	1	5	0.2	0.962396	0.137597	1	1	A0A0D1BYD1_USTMA
biological_process	GO:0030007	cellular potassium ion homeostasis	1	3	0.333333	0.849758	0.569212	1	1	A0A0D1CKG8_USTMA
cellular_component	GO:0005657	replication fork	1	2	0.5	0.861568	0.266705	1	1	A0A0D1DZD7_USTMA
biological_process	GO:0008654	phospholipid biosynthetic process	1	7	0.142857	0.809851	0.271806	1	1	A0A0D1E978_USTMA
biological_process	GO:0045454	cell redox homeostasis	1	10	0.1	0.255823	0.939806	1	1	A0A0D1E5N7_USTMA
biological_process	GO:0045898	regulation of RNA polymerase II transcription preinitiation complex assembly	1	1	1	0.380209	0.894332	1	1	A0A0D1C1L3_USTMA
cellular_component	GO:0061617	MICOS complex	1	3	0.333333	0.865164	0.544469	1	1	A0A0D1EDD1_USTMA
biological_process	GO:0042407	cristae formation	1	4	0.25	0.74727	0.674707	1	1	A0A0D1EDD1_USTMA
molecular_function	GO:0102203	brassicasterol glucosyltransferase activity	1	1	1	1	0.23441	1	1	A0A0D1DZT0_USTMA
molecular_function	GO:0102205	cholesterol alpha-glucosyltransferase activity	1	1	1	1	0.23441	1	1	A0A0D1DZT0_USTMA
molecular_function	GO:0102202	soladodine glucosyltransferase activity	1	1	1	1	0.23441	1	1	A0A0D1DZT0_USTMA
molecular_function	GO:0016906	sterol 3-beta-glucosyltransferase activity	1	1	1	1	0.23441	1	1	A0A0D1DZT0_USTMA
biological_process	GO:0009116	nucleoside metabolic process	1	9	0.111111	0.206281	0.918282	1	1	A0A0D1E8Z9_USTMA
molecular_function	GO:0003951	NAD+ kinase activity	1	4	0.25	0.764358	0.656609	1	1	A0A0D1DN85_USTMA
cellular_component	GO:0005946	alpha,alpha-trehalose-phosphate synthase complex (UDP-forming)	1	3	0.333333	0.865164	0.544469	1	1	A0A0D1DWT5_USTMA
molecular_function	GO:0008233	peptidase activity	1	7	0.142857	0.316798	0.753905	1	1	A0A0D1E9U8_USTMA
molecular_function	GO:0000993	RNA polymerase II complex binding	1	7	0.142857	0.696602	0.559835	1	1	A0A0D1DP85_USTMA
molecular_function	GO:0016783	sulfurtransferase activity	1	1	1	0.189106	0.959655	1	1	A0A0D1E0S3_USTMA
molecular_function	GO:0005537	mannose binding	1	1	1	1	0.23441	1	1	A0A0D1DU98_USTMA
cellular_component	GO:0030008	TRAPP complex	1	7	0.142857	0.708303	0.546951	1	1	A0A0D1CSW3_USTMA
molecular_function	GO:0004571	mannosyl-oligosaccharide 1,2-alpha-mannosidase activity	1	3	0.333333	0.860987	0.551367	1	1	A0A0D1DV47_USTMA
molecular_function	GO:0016298	lipase activity	1	7	0.142857	0.635845	0.524122	1	1	A0A0D1CIJ0_USTMA
biological_process	GO:0072684	mitochondrial tRNA 3'-trailer cleavage, endonucleolytic	1	2	0.5	0.940177	0.429556	1	1	A0A0D1DME6_USTMA
molecular_function	GO:0004366	glycerol-3-phosphate O-acyltransferase activity	1	2	0.5	0.945096	0.413916	1	1	A0A0D1E978_USTMA
biological_process	GO:0000902	cell morphogenesis	1	5	0.2	0.175492	0.945239	1	1	A0A0D1E7N8_USTMA
biological_process	GO:0000747	conjugation with cellular fusion	1	2	0.5	0.0443677	0.989745	1	1	A0A0D1DYZ3_USTMA
cellular_component	GO:0044613	nuclear pore central transport channel	1	4	0.25	0.770771	0.649549	1	1	A0A0D1E1J0_USTMA
molecular_function	GO:0004407	histone deacetylase activity	1	5	0.2	0.644346	0.660928	1	1	A0A0D1BYN7_USTMA
molecular_function	GO:0004072	aspartate kinase activity	1	2	0.5	0.945096	0.413916	1	1	A0A0D1CX31_USTMA
biological_process	GO:0009090	homoserine biosynthetic process	1	3	0.333333	0.849758	0.569212	1	1	A0A0D1CX31_USTMA
biological_process	GO:0009089	lysine biosynthetic process via diaminopimelate	1	1	1	1	0.244689	1	1	A0A0D1CX31_USTMA
cellular_component	GO:0030690	Noc1p-Noc2p complex	1	1	1	1	0.230508	1	1	A0A0D1C8Q3_USTMA
cellular_component	GO:0030691	Noc2p-Noc3p complex	1	1	1	1	0.230508	1	1	A0A0D1C8Q3_USTMA
molecular_function	GO:0016788	hydrolase activity, acting on ester bonds	1	7	0.142857	0.351448	0.701815	1	1	A0A0D1DQ41_USTMA
molecular_function	GO:0000064	L-ornithine transmembrane transporter activity	1	3	0.333333	0.860987	0.551367	1	1	A0A0D1E720_USTMA
biological_process	GO:1990575	mitochondrial L-ornithine transmembrane transport	1	3	0.333333	0.849758	0.569212	1	1	A0A0D1E720_USTMA
molecular_function	GO:0016829	lyase activity	1	6	0.166667	0.0156374	0.992008	0.841	1	A0A0D1E8Y1_USTMA
cellular_component	GO:0048471	perinuclear region of cytoplasm	1	2	0.5	0.417305	0.877327	1	1	A0A0D1EDM6_USTMA
biological_process	GO:0000920	septum digestion after cytokinesis	1	3	0.333333	0.74727	0.674707	1	1	A0A0D1BZG9_USTMA
molecular_function	GO:0015440	ABC-type peptide transporter activity	1	5	0.2	0.665686	0.737183	1	1	A0A0D1CBL8_USTMA
biological_process	GO:0090502	RNA phosphodiester bond hydrolysis, endonucleolytic	1	4	0.25	0.589204	0.611626	1	1	A0A0D1E280_USTMA
biological_process	GO:0097552	mitochondrial double-strand break repair via homologous recombination	1	1	1	1	0.244689	1	1	A0A0D1BXI7_USTMA
molecular_function	GO:0015369	calcium:proton antiporter activity	1	3	0.333333	0.860987	0.551367	1	1	A0A0D1DXI2_USTMA
cellular_component	GO:0070822	Sin3-type complex	1	3	0.333333	0.494597	0.840498	1	1	A0A0D1BWL5_USTMA
biological_process	GO:0031929	TOR signaling	1	4	0.25	0.83986	0.312039	1	1	A0A0D1DZS5_USTMA
biological_process	GO:0032446	protein modification by small protein conjugation	1	7	0.142857	0.896016	0.155484	1	1	A0A0D1CFJ5_USTMA
molecular_function	GO:0004826	phenylalanine-tRNA ligase activity	1	3	0.333333	0.860987	0.551367	1	1	A0A0D1CDX3_USTMA
biological_process	GO:0006432	phenylalanyl-tRNA aminoacylation	1	3	0.333333	0.849758	0.569212	1	1	A0A0D1CDX3_USTMA
molecular_function	GO:0005319	lipid transporter activity	1	1	1	0.361047	0.83033	1	1	A0A0D1E0Y3_USTMA
biological_process	GO:0006972	hyperosmotic response	1	1	1	0.952246	0.25273	1	1	A0A0D1E8D6_USTMA
biological_process	GO:0007232	osmosensory signaling pathway via Sho1 osmosensor	1	1	1	1	0.244689	1	1	A0A0D1E8D6_USTMA
biological_process	GO:0001402	signal transduction involved in filamentous growth	1	1	1	1	0.244689	1	1	A0A0D1E8D6_USTMA
cellular_component	GO:0046695	SLIK (SAGA-like) complex	1	3	0.333333	0.865164	0.544469	1	1	A0A0D1E0G9_USTMA
cellular_component	GO:0032541	cortical endoplasmic reticulum	1	5	0.2	0.580683	0.792627	1	1	A0A0D1CXV0_USTMA
molecular_function	GO:0019905	syntaxin binding	1	8	0.125	0.40691	0.882225	1	1	A0A0D1DYZ9_USTMA
molecular_function	GO:0008195	phosphatidate phosphatase activity	1	3	0.333333	0.860987	0.551367	1	1	A0A0D1CL95_USTMA
molecular_function	GO:0051920	peroxiredoxin activity	1	5	0.2	0.280645	0.931058	1	1	A0A0D1DTH5_USTMA
molecular_function	GO:0004930	G protein-coupled receptor activity	1	1	1	0.945096	0.413916	1	1	A0A0D1E0T5_USTMA
biological_process	GO:0006120	mitochondrial electron transport, NADH to ubiquinone	1	6	0.166667	0.546509	0.814568	1	1	A0A0D1CBQ6_USTMA
biological_process	GO:0006617	SRP-dependent cotranslational protein targeting to membrane, signal sequence recognition	1	1	1	1	0.244689	1	1	A0A0D1C2A1_USTMA
molecular_function	GO:0030975	thiamine binding	1	1	1	1	0.23441	1	1	A0A0D1CNX0_USTMA
molecular_function	GO:0004788	thiamine diphosphokinase activity	1	1	1	1	0.23441	1	1	A0A0D1CNX0_USTMA
cellular_component	GO:0033596	TSC1-TSC2 complex	1	2	0.5	0.946909	0.407925	1	1	A0A0D1CD33_USTMA
biological_process	GO:0032006	regulation of TOR signaling	1	1	1	0.665292	0.592999	1	1	A0A0D1DYU5_USTMA
molecular_function	GO:0034257	nicotinamide riboside transmembrane transporter activity	1	1	1	1	0.23441	1	1	A0A0D1CGN9_USTMA
molecular_function	GO:0015205	nucleobase transmembrane transporter activity	1	3	0.333333	0.571232	0.798866	1	1	A0A0D1CGN9_USTMA
molecular_function	GO:0005337	nucleoside transmembrane transporter activity	1	2	0.5	0.945096	0.413916	1	1	A0A0D1CGN9_USTMA
molecular_function	GO:0003910	DNA ligase (ATP) activity	1	4	0.25	0.764358	0.656609	1	1	A0A0D1E8A3_USTMA
cellular_component	GO:0032777	Piccolo NuA4 histone acetyltransferase complex	1	1	1	1	0.230508	1	1	A0A0D1E5B1_USTMA
cellular_component	GO:0030905	retromer, tubulation complex	1	1	1	1	0.230508	1	1	A0A0D1CZ19_USTMA
biological_process	GO:0007089	traversing start control point of mitotic cell cycle	1	2	0.5	0.940177	0.429556	1	1	A0A0D1BUR0_USTMA
molecular_function	GO:0042799	histone methyltransferase activity (H4-K20 specific)	1	1	1	1	0.23441	1	1	A0A0D1E8J1_USTMA
biological_process	GO:0034773	histone H4-K20 trimethylation	1	1	1	1	0.244689	1	1	A0A0D1E8J1_USTMA
molecular_function	GO:0043813	phosphatidylinositol-3,5-bisphosphate 5-phosphatase activity	1	2	0.5	0.945096	0.413916	1	1	A0A0D1BVU2_USTMA
molecular_function	GO:0004439	phosphatidylinositol-4,5-bisphosphate 5-phosphatase activity	1	5	0.2	0.665686	0.737183	1	1	A0A0D1E5P2_USTMA
molecular_function	GO:0016627	oxidoreductase activity, acting on the CH-CH group of donors	1	9	0.111111	0.334054	0.798761	1	1	A0A0D1E885_USTMA
molecular_function	GO:0004067	asparaginase activity	1	2	0.5	0.945096	0.413916	1	1	A0A0D1DVX3_USTMA
molecular_function	GO:0004334	fumarylacetoacetase activity	1	2	0.5	0.945096	0.413916	1	1	A0A0D1CZ51_USTMA
biological_process	GO:1902000	homogentisate catabolic process	1	2	0.5	0.940177	0.429556	1	1	A0A0D1CZ51_USTMA
biological_process	GO:0006572	tyrosine catabolic process	1	2	0.5	0.940177	0.429556	1	1	A0A0D1CZ51_USTMA
biological_process	GO:0006383	transcription by RNA polymerase III	1	8	0.125	0.453273	0.71568	1	1	A0A0D1D079_USTMA
cellular_component	GO:0015630	microtubule cytoskeleton	1	7	0.142857	0.929788	0.111723	1	1	A0A0D1E6A7_USTMA
biological_process	GO:0034613	cellular protein localization	1	6	0.166667	0.574024	0.483551	1	1	A0A0D1E6A7_USTMA
molecular_function	GO:0004024	alcohol dehydrogenase activity, zinc-dependent	1	2	0.5	0.945096	0.413916	1	1	A0A0D1DMY2_USTMA
molecular_function	GO:0033833	hydroxymethylfurfural reductase (NADH) activity	1	1	1	1	0.23441	1	1	A0A0D1DMY2_USTMA
molecular_function	GO:0051903	S-(hydroxymethyl)glutathione dehydrogenase activity	1	2	0.5	0.945096	0.413916	1	1	A0A0D1DMY2_USTMA
molecular_function	GO:0106322	S-(hydroxymethyl)glutathione dehydrogenase NAD activity	1	1	1	1	0.23441	1	1	A0A0D1DMY2_USTMA
molecular_function	GO:0106321	S-(hydroxymethyl)glutathione dehydrogenase NADP activity	1	1	1	1	0.23441	1	1	A0A0D1DMY2_USTMA
biological_process	GO:0000947	amino acid catabolic process to alcohol via Ehrlich pathway	1	1	1	1	0.244689	1	1	A0A0D1DMY2_USTMA
biological_process	GO:0006069	ethanol oxidation	1	1	1	1	0.244689	1	1	A0A0D1DMY2_USTMA
biological_process	GO:0046294	formaldehyde catabolic process	1	3	0.333333	0.849758	0.569212	1	1	A0A0D1DMY2_USTMA
biological_process	GO:0033859	furaldehyde metabolic process	1	1	1	1	0.244689	1	1	A0A0D1DMY2_USTMA
cellular_component	GO:0097422	tubular endosome	1	1	1	1	0.230508	1	1	A0A0D1DU73_USTMA
biological_process	GO:0045022	early endosome to late endosome transport	1	1	1	1	0.244689	1	1	A0A0D1DU73_USTMA
molecular_function	GO:0002083	4-hydroxybenzoate decaprenyltransferase activity	1	1	1	1	0.23441	1	1	A0A0D1E292_USTMA
molecular_function	GO:0047293	4-hydroxybenzoate nonaprenyltransferase activity	1	1	1	1	0.23441	1	1	A0A0D1E292_USTMA
molecular_function	GO:0008412	4-hydroxybenzoate octaprenyltransferase activity	1	1	1	1	0.23441	1	1	A0A0D1E292_USTMA
molecular_function	GO:0004575	sucrose alpha-glucosidase activity	1	3	0.333333	0.860987	0.551367	1	1	A0A0D1E3W7_USTMA
biological_process	GO:0009313	oligosaccharide catabolic process	1	4	0.25	0.767502	0.541888	1	1	A0A0D1DVS1_USTMA
biological_process	GO:0005987	sucrose catabolic process	1	3	0.333333	0.849758	0.569212	1	1	A0A0D1E3W7_USTMA
molecular_function	GO:0019702	protein-arginine N5-methyltransferase activity	1	1	1	1	0.23441	1	1	A0A0D1E7S0_USTMA
biological_process	GO:0018216	peptidyl-arginine methylation	1	2	0.5	0.849758	0.569212	1	1	A0A0D1E7S0_USTMA
molecular_function	GO:0003980	UDP-glucose:glycoprotein glucosyltransferase activity	1	1	1	1	0.23441	1	1	A0A0D1CAH9_USTMA
molecular_function	GO:0018580	nitronate monooxygenase activity	1	3	0.333333	0.860987	0.551367	1	1	A0A0D1E3U3_USTMA
cellular_component	GO:0005968	Rab-protein geranylgeranyltransferase complex	1	3	0.333333	0.865164	0.544469	1	1	A0A0D1E1H8_USTMA
biological_process	GO:0018344	protein geranylgeranylation	1	5	0.2	0.644019	0.754388	1	1	A0A0D1E1H8_USTMA
molecular_function	GO:0004298	threonine-type endopeptidase activity	1	7	0.142857	0.484441	0.846083	1	1	A0A0D1DNX0_USTMA
cellular_component	GO:0034388	Pwp2p-containing subcomplex of 90S preribosome	1	5	0.2	0.673892	0.730409	1	1	A0A0D1CY14_USTMA
molecular_function	GO:0050113	inositol oxygenase activity	1	1	1	1	0.23441	1	1	A0A0D1E816_USTMA
biological_process	GO:0019310	inositol catabolic process	1	1	1	1	0.244689	1	1	A0A0D1E816_USTMA
molecular_function	GO:0004314	[acyl-carrier-protein] S-malonyltransferase activity	1	2	0.5	0.945096	0.413916	1	1	A0A0D1C5S0_USTMA
molecular_function	GO:0016209	antioxidant activity	1	1	1	0.09231	0.969287	1	1	A0A0D1CMP5_USTMA
biological_process	GO:0006402	mRNA catabolic process	1	2	0.5	0.994702	0.011329	1	0.985	A0A0D1DQF4_USTMA
cellular_component	GO:0030897	HOPS complex	1	5	0.2	0.673892	0.730409	1	1	A0A0D1DXQ1_USTMA
biological_process	GO:0007032	endosome organization	1	3	0.333333	0.458112	0.860014	1	1	A0A0D1E277_USTMA
biological_process	GO:0006904	vesicle docking involved in exocytosis	1	6	0.166667	0.546509	0.814568	1	1	A0A0D1DRH1_USTMA
biological_process	GO:0006999	nuclear pore organization	1	4	0.25	0.644019	0.754388	1	1	A0A0D1E1J0_USTMA
biological_process	GO:0043171	peptide catabolic process	1	3	0.333333	0.380209	0.894332	1	1	A0A0D1E264_USTMA
biological_process	GO:0051603	proteolysis involved in cellular protein catabolic process	1	3	0.333333	0.893198	0.142665	1	1	A0A0D1E264_USTMA
molecular_function	GO:0001727	lipid kinase activity	1	3	0.333333	0.860987	0.551367	1	1	A0A0D1DN85_USTMA
molecular_function	GO:0004550	nucleoside diphosphate kinase activity	1	4	0.25	0.764358	0.656609	1	1	A0A0D1C4S0_USTMA
molecular_function	GO:0004798	thymidylate kinase activity	1	1	1	1	0.23441	1	1	A0A0D1C4S0_USTMA
molecular_function	GO:0009041	uridylate kinase activity	1	1	1	0.945096	0.413916	1	1	A0A0D1C4S0_USTMA
biological_process	GO:0006233	dTDP biosynthetic process	1	1	1	1	0.244689	1	1	A0A0D1C4S0_USTMA
biological_process	GO:0006235	dTTP biosynthetic process	1	2	0.5	0.940177	0.429556	1	1	A0A0D1C4S0_USTMA
biological_process	GO:0006227	dUDP biosynthetic process	1	1	1	1	0.244689	1	1	A0A0D1C4S0_USTMA
molecular_function	GO:0004435	phosphatidylinositol phospholipase C activity	1	2	0.5	0.945096	0.413916	1	1	A0A0D1CR16_USTMA
cellular_component	GO:0035838	growing cell tip	1	3	0.333333	0.971868	0.139689	1	1	A0A0D1D1B0_USTMA
molecular_function	GO:0004609	phosphatidylserine decarboxylase activity	1	3	0.333333	0.860987	0.551367	1	1	A0A0D1CSH0_USTMA
biological_process	GO:0006646	phosphatidylethanolamine biosynthetic process	1	3	0.333333	0.849758	0.569212	1	1	A0A0D1CSH0_USTMA
molecular_function	GO:0043495	protein-membrane adaptor activity	1	2	0.5	0.945096	0.413916	1	1	A0A0D1EA30_USTMA
molecular_function	GO:0051998	protein carboxyl O-methyltransferase activity	1	2	0.5	0.854592	0.428768	1	1	A0A0D1CHV9_USTMA
biological_process	GO:2001020	regulation of response to DNA damage stimulus	1	2	0.5	0.83904	0.453491	1	1	A0A0D1CHV9_USTMA
cellular_component	GO:0030125	clathrin vesicle coat	1	4	0.25	0.765614	0.483138	1	1	A0A0D1DY37_USTMA
molecular_function	GO:1990247	N6-methyladenosine-containing RNA binding	1	2	0.5	0.945096	0.413916	1	1	A0A0D1E4L6_USTMA
biological_process	GO:0061157	mRNA destabilization	1	3	0.333333	0.954754	0.100062	1	1	A0A0D1E4L6_USTMA
molecular_function	GO:0004484	mRNA guanylyltransferase activity	1	2	0.5	0.945096	0.413916	1	1	A0A0D1DWA0_USTMA
molecular_function	GO:0004326	tetrahydrofolylpolyglutamate synthase activity	1	2	0.5	0.945096	0.413916	1	1	A0A0D1DPA2_USTMA
biological_process	GO:0006730	one-carbon metabolic process	1	9	0.111111	0.602095	0.651528	1	1	A0A0D1DPA2_USTMA
cellular_component	GO:0070319	Golgi to plasma membrane transport vesicle	1	1	1	1	0.230508	1	1	A0A0D1E8J8_USTMA
cellular_component	GO:0005832	chaperonin-containing T-complex	1	8	0.125	0.417305	0.877327	1	1	A0A0D1C026_USTMA
molecular_function	GO:0051959	dynein light intermediate chain binding	1	4	0.25	0.764358	0.656609	1	1	A0A0D1DZW2_USTMA
biological_process	GO:0030705	cytoskeleton-dependent intracellular transport	1	3	0.333333	0.807484	0.397905	1	1	A0A0D1CLV6_USTMA
molecular_function	GO:0009982	pseudouridine synthase activity	1	6	0.166667	0.571232	0.798866	1	1	A0A0D1DV38_USTMA
biological_process	GO:1990481	mRNA pseudouridine synthesis	1	4	0.25	0.74727	0.674707	1	1	A0A0D1DV38_USTMA
biological_process	GO:0031119	tRNA pseudouridine synthesis	1	2	0.5	0.940177	0.429556	1	1	A0A0D1DV38_USTMA
molecular_function	GO:0000822	inositol hexakisphosphate binding	1	3	0.333333	0.860987	0.551367	1	1	A0A0D1EAJ2_USTMA
biological_process	GO:0042144	vacuole fusion, non-autophagic	1	6	0.166667	0.255823	0.939806	1	1	A0A0D1CRQ3_USTMA
molecular_function	GO:0003935	GTP cyclohydrolase II activity	1	2	0.5	0.945096	0.413916	1	1	A0A0D1DQS9_USTMA
biological_process	GO:0009231	riboflavin biosynthetic process	1	7	0.142857	0.458112	0.860014	1	1	A0A0D1DQS9_USTMA
cellular_component	GO:0005662	DNA replication factor A complex	1	3	0.333333	0.865164	0.544469	1	1	A0A0D1CUI6_USTMA
biological_process	GO:0031118	rRNA pseudouridine synthesis	1	5	0.2	0.458112	0.860014	1	1	A0A0D1E362_USTMA
biological_process	GO:0031120	snRNA pseudouridine synthesis	1	5	0.2	0.644019	0.754388	1	1	A0A0D1E362_USTMA
cellular_component	GO:1990537	mitotic spindle polar microtubule	1	1	1	1	0.230508	1	1	A0A0D1CUN2_USTMA
biological_process	GO:1990758	mitotic sister chromatid biorientation	1	3	0.333333	0.849758	0.569212	1	1	A0A0D1CUN2_USTMA
molecular_function	GO:0070290	N-acylphosphatidylethanolamine-specific phospholipase D activity	1	5	0.2	0.665686	0.737183	1	1	A0A0D1C582_USTMA
molecular_function	GO:0004817	cysteine-tRNA ligase activity	1	1	1	1	0.23441	1	1	A0A0D1E042_USTMA
biological_process	GO:0006423	cysteinyl-tRNA aminoacylation	1	1	1	1	0.244689	1	1	A0A0D1E042_USTMA
molecular_function	GO:0008659	(3R)-hydroxymyristoyl-[acyl-carrier-protein] dehydratase activity	1	1	1	1	0.23441	1	1	A0A0D1C5S0_USTMA
molecular_function	GO:0008693	3-hydroxydecanoyl-[acyl-carrier-protein] dehydratase activity	1	1	1	1	0.23441	1	1	A0A0D1C5S0_USTMA
molecular_function	GO:0047451	3-hydroxyoctanoyl-[acyl-carrier-protein] dehydratase activity	1	1	1	1	0.23441	1	1	A0A0D1C5S0_USTMA
molecular_function	GO:0004313	[acyl-carrier-protein] S-acetyltransferase activity	1	1	1	1	0.23441	1	1	A0A0D1C5S0_USTMA
molecular_function	GO:0016631	enoyl-[acyl-carrier-protein] reductase activity	1	1	1	1	0.23441	1	1	A0A0D1C5S0_USTMA
molecular_function	GO:0016295	myristoyl-[acyl-carrier-protein] hydrolase activity	1	1	1	1	0.23441	1	1	A0A0D1C5S0_USTMA
molecular_function	GO:0004320	oleoyl-[acyl-carrier-protein] hydrolase activity	1	1	1	1	0.23441	1	1	A0A0D1C5S0_USTMA
molecular_function	GO:0016296	palmitoyl-[acyl-carrier-protein] hydrolase activity	1	1	1	1	0.23441	1	1	A0A0D1C5S0_USTMA
molecular_function	GO:0004092	carnitine O-acetyltransferase activity	1	2	0.5	0.945096	0.413916	1	1	A0A0D1E8D8_USTMA
biological_process	GO:0009437	carnitine metabolic process	1	2	0.5	0.849758	0.569212	1	1	A0A0D1E8D8_USTMA
molecular_function	GO:0004559	alpha-mannosidase activity	1	2	0.5	0.912366	0.334314	1	1	A0A0D1DVS1_USTMA
biological_process	GO:0006013	mannose metabolic process	1	4	0.25	0.74727	0.674707	1	1	A0A0D1DVS1_USTMA
biological_process	GO:0009166	nucleotide catabolic process	1	4	0.25	0.296231	0.89158	1	1	A0A0D1CGW4_USTMA
biological_process	GO:0046474	glycerophospholipid biosynthetic process	1	3	0.333333	0.91127	0.147589	1	1	A0A0D1CUP4_USTMA
biological_process	GO:0006493	protein O-linked glycosylation	1	2	0.5	0.13525	0.974137	1	1	A0A0D1E7S4_USTMA
biological_process	GO:0000086	G2/M transition of mitotic cell cycle	1	4	0.25	0.94962	0.126549	1	1	A0A0D1E446_USTMA
biological_process	GO:0000706	meiotic DNA double-strand break processing	1	3	0.333333	0.849758	0.569212	1	1	A0A0D1CM04_USTMA
molecular_function	GO:0016303	1-phosphatidylinositol-3-kinase activity	1	1	1	1	0.23441	1	1	A0A0D1E9M7_USTMA
biological_process	GO:0036092	phosphatidylinositol-3-phosphate biosynthetic process	1	1	1	1	0.244689	1	1	A0A0D1E9M7_USTMA
molecular_function	GO:0106306	protein serine/threonine phosphatase activity	1	13	0.0769231	NA	NA	NA	NA	A0A0D1ED52_USTMA
molecular_function	GO:0106307	protein serine/threonine phosphatase activity	1	13	0.0769231	NA	NA	NA	NA	A0A0D1ED52_USTMA
cellular_component	GO:0044611	nuclear pore inner ring	1	3	0.333333	0.865164	0.544469	1	1	A0A0D1BVD0_USTMA
biological_process	GO:0036228	protein localization to nuclear inner membrane	1	2	0.5	0.940177	0.429556	1	1	A0A0D1E1J0_USTMA
molecular_function	GO:0003725	double-stranded RNA binding	1	6	0.166667	0.811336	0.427222	1	1	A0A0D1C8D3_USTMA
biological_process	GO:0006450	regulation of translational fidelity	1	4	0.25	0.380209	0.894332	1	1	A0A0D1C8D3_USTMA
cellular_component	GO:0035145	exon-exon junction complex	1	4	0.25	0.770771	0.649549	1	1	A0A0D1DW43_USTMA
biological_process	GO:0009968	negative regulation of signal transduction	1	1	1	0.445623	0.735059	1	1	A0A0D1CST6_USTMA
molecular_function	GO:0017057	6-phosphogluconolactonase activity	1	4	0.25	0.764358	0.656609	1	1	A0A0D1CM18_USTMA
cellular_component	GO:0031417	NatC complex	1	3	0.333333	0.865164	0.544469	1	1	A0A0D1CWX3_USTMA
cellular_component	GO:0000813	ESCRT I complex	1	2	0.5	0.946909	0.407925	1	1	A0A0D1E641_USTMA
molecular_function	GO:0016433	rRNA (adenine) methyltransferase activity	1	2	0.5	0.665686	0.737183	1	1	A0A0D1DXE3_USTMA
molecular_function	GO:0009927	histidine phosphotransfer kinase activity	1	5	0.2	0.665686	0.737183	1	1	A0A0D1CPY9_USTMA
molecular_function	GO:0004418	hydroxymethylbilane synthase activity	1	1	1	1	0.23441	1	1	A0A0D1EA13_USTMA
biological_process	GO:0018160	peptidyl-pyrromethane cofactor linkage	1	1	1	1	0.244689	1	1	A0A0D1EA13_USTMA
biological_process	GO:0006782	protoporphyrinogen IX biosynthetic process	1	6	0.166667	0.546509	0.814568	1	1	A0A0D1EA13_USTMA
cellular_component	GO:0030132	clathrin coat of coated pit	1	2	0.5	0.91609	0.326108	1	1	A0A0D1DZ93_USTMA
cellular_component	GO:0030130	clathrin coat of trans-Golgi network vesicle	1	2	0.5	0.673892	0.730409	1	1	A0A0D1DZ93_USTMA
cellular_component	GO:0071439	clathrin complex	1	1	1	1	0.230508	1	1	A0A0D1DZ93_USTMA
molecular_function	GO:0032051	clathrin light chain binding	1	2	0.5	0.945096	0.413916	1	1	A0A0D1DZ93_USTMA
cellular_component	GO:0000126	transcription factor TFIIIB complex	1	3	0.333333	0.865164	0.544469	1	1	A0A0D1EB25_USTMA
molecular_function	GO:0001156	TFIIIC-class transcription factor complex binding	1	1	1	1	0.23441	1	1	A0A0D1EB25_USTMA
biological_process	GO:0070898	RNA polymerase III preinitiation complex assembly	1	2	0.5	0.940177	0.429556	1	1	A0A0D1EB25_USTMA
molecular_function	GO:0004722	protein serine/threonine phosphatase activity	1	9	0.111111	0.142209	0.957725	1	1	A0A0D1DTT8_USTMA
biological_process	GO:0051601	exocyst localization	1	1	1	1	0.244689	1	1	A0A0D1DY75_USTMA
molecular_function	GO:0030272	5-formyltetrahydrofolate cyclo-ligase activity	1	1	1	1	0.23441	1	1	A0A0D1DWY9_USTMA
biological_process	GO:0007007	inner mitochondrial membrane organization	1	3	0.333333	0.471573	0.792122	1	1	A0A0D1C1D7_USTMA
molecular_function	GO:0004065	arylsulfatase activity	1	1	1	1	0.23441	1	1	A0A0D1E6K2_USTMA
biological_process	GO:0045002	double-strand break repair via single-strand annealing	1	1	1	1	0.244689	1	1	A0A0D1BZJ4_USTMA
molecular_function	GO:0016811	hydrolase activity, acting on carbon-nitrogen (but not peptide) bonds, in linear amides	1	2	0.5	0.531564	0.617227	1	1	A0A0D1E0Z5_USTMA
cellular_component	GO:1990429	peroxisomal importomer complex	1	5	0.2	0.673892	0.730409	1	1	A0A0D1E5X2_USTMA
molecular_function	GO:0045505	dynein intermediate chain binding	1	4	0.25	0.764358	0.656609	1	1	A0A0D1DZW2_USTMA
biological_process	GO:0030473	nuclear migration along microtubule	1	2	0.5	0.952246	0.25273	1	1	A0A0D1DUD4_USTMA
molecular_function	GO:0008841	dihydrofolate synthase activity	1	1	1	1	0.23441	1	1	A0A0D1DPA2_USTMA
biological_process	GO:0030162	regulation of proteolysis	1	2	0.5	0.296231	0.89158	1	1	A0A0D1DVA8_USTMA
molecular_function	GO:0004349	glutamate 5-kinase activity	1	1	1	1	0.23441	1	1	A0A0D1CZS8_USTMA
biological_process	GO:0006561	proline biosynthetic process	1	1	1	0.952246	0.25273	1	1	A0A0D1CZS8_USTMA
biological_process	GO:0071966	fungal-type cell wall polysaccharide metabolic process	1	5	0.2	0.458112	0.860014	1	1	A0A0D1E869_USTMA
molecular_function	GO:0004784	superoxide dismutase activity	1	3	0.333333	0.860987	0.551367	1	1	A0A0D1BUE2_USTMA
biological_process	GO:0045727	positive regulation of translation	1	2	0.5	0.348472	0.86475	1	1	A0A0D1E8Q2_USTMA
biological_process	GO:0048211	Golgi vesicle docking	1	3	0.333333	0.849758	0.569212	1	1	A0A0D1C041_USTMA
biological_process	GO:0045056	transcytosis	1	2	0.5	0.940177	0.429556	1	1	A0A0D1C041_USTMA
cellular_component	GO:0000274	mitochondrial proton-transporting ATP synthase, stator stalk	1	3	0.333333	0.865164	0.544469	1	1	A0A0D1BW64_USTMA
biological_process	GO:0065003	protein-containing complex assembly	1	2	0.5	0.00349593	0.997836	0.505	1	A0A0D1BW64_USTMA
biological_process	GO:0009051	pentose-phosphate shunt, oxidative branch	1	3	0.333333	0.849758	0.569212	1	1	A0A0D1CM18_USTMA
biological_process	GO:0071474	cellular hyperosmotic response	1	2	0.5	0.940177	0.429556	1	1	A0A0D1CS93_USTMA
molecular_function	GO:0008418	protein-N-terminal asparagine amidohydrolase activity	1	2	0.5	0.945096	0.413916	1	1	A0A0D1E1G0_USTMA
molecular_function	GO:0070773	protein-N-terminal glutamine amidohydrolase activity	1	2	0.5	0.945096	0.413916	1	1	A0A0D1E1G0_USTMA
molecular_function	GO:0004034	aldose 1-epimerase activity	1	2	0.5	0.945096	0.413916	1	1	A0A0D1CBM5_USTMA
biological_process	GO:0033499	galactose catabolic process via UDP-galactose	1	4	0.25	0.74727	0.674707	1	1	A0A0D1CBM5_USTMA
biological_process	GO:0034498	early endosome to Golgi transport	1	1	1	1	0.244689	1	1	A0A0D1DNV8_USTMA
cellular_component	GO:0071561	nucleus-vacuole junction	1	1	1	1	0.230508	1	1	A0A0D1CXP7_USTMA
molecular_function	GO:0008138	protein tyrosine/serine/threonine phosphatase activity	1	5	0.2	0.665686	0.737183	1	1	A0A0D1E687_USTMA
cellular_component	GO:0000818	nuclear MIS12/MIND complex	1	3	0.333333	0.865164	0.544469	1	1	A0A0D1DVB6_USTMA
cellular_component	GO:0005618	cell wall	1	3	0.333333	0.739386	0.454159	1	1	A0A0D1E3F9_USTMA
molecular_function	GO:0004673	protein histidine kinase activity	1	1	1	0.854592	0.428768	1	1	A0A0D1CS93_USTMA
biological_process	GO:0044209	AMP salvage	1	2	0.5	0.940177	0.429556	1	1	A0A0D1EDZ5_USTMA
cellular_component	GO:0008275	gamma-tubulin small complex	1	3	0.333333	0.865164	0.544469	1	1	A0A0D1BZI3_USTMA
biological_process	GO:0034389	lipid droplet organization	1	3	0.333333	0.74727	0.674707	1	1	A0A0D1DTN0_USTMA
biological_process	GO:0044772	mitotic cell cycle phase transition	1	3	0.333333	0.770765	0.332941	1	1	A0A0D1E446_USTMA
biological_process	GO:0019752	carboxylic acid metabolic process	1	5	0.2	0.0010291	0.999386	0.178	1	A0A0D1E5G6_USTMA
cellular_component	GO:0000221	vacuolar proton-transporting V-type ATPase, V1 domain	1	4	0.25	0.770771	0.649549	1	1	A0A0D1DTV7_USTMA
molecular_function	GO:0001227	DNA-binding transcription repressor activity, RNA polymerase II-specific	1	1	1	1	0.23441	1	1	A0A0D1DQY1_USTMA
molecular_function	GO:0008073	ornithine decarboxylase inhibitor activity	1	1	1	1	0.23441	1	1	A0A0D1EDL2_USTMA
biological_process	GO:0043966	histone H3 acetylation	1	4	0.25	0.83904	0.453491	1	1	A0A0D1DNQ9_USTMA
molecular_function	GO:0004015	adenosylmethionine-8-amino-7-oxononanoate transaminase activity	1	1	1	1	0.23441	1	1	A0A0D1E2Z5_USTMA
molecular_function	GO:0004141	dethiobiotin synthase activity	1	1	1	1	0.23441	1	1	A0A0D1E2Z5_USTMA
biological_process	GO:0009102	biotin biosynthetic process	1	3	0.333333	0.849758	0.569212	1	1	A0A0D1E2Z5_USTMA
molecular_function	GO:0051879	Hsp90 protein binding	1	6	0.166667	0.571232	0.798866	1	1	A0A0D1DYY3_USTMA
molecular_function	GO:0004753	saccharopine dehydrogenase activity	1	1	1	0.945096	0.413916	1	1	A0A0D1BVQ6_USTMA
biological_process	GO:0006596	polyamine biosynthetic process	1	1	1	0.74727	0.674707	1	1	A0A0D1BVQ6_USTMA
biological_process	GO:0001080	nitrogen catabolite activation of transcription from RNA polymerase II promoter	1	2	0.5	0.940177	0.429556	1	1	A0A0D1E9F3_USTMA
molecular_function	GO:0015410	ABC-type manganese transporter activity	1	1	1	1	0.23441	1	1	A0A0D1DSP1_USTMA
biological_process	GO:0006828	manganese ion transport	1	1	1	0.940177	0.429556	1	1	A0A0D1DSP1_USTMA
cellular_component	GO:0070776	MOZ/MORF histone acetyltransferase complex	1	2	0.5	0.946909	0.407925	1	1	A0A0D1DPK8_USTMA
biological_process	GO:0044154	histone H3-K14 acetylation	1	2	0.5	0.940177	0.429556	1	1	A0A0D1DPK8_USTMA
biological_process	GO:0043972	histone H3-K23 acetylation	1	2	0.5	0.940177	0.429556	1	1	A0A0D1DPK8_USTMA
molecular_function	GO:0046943	carboxylic acid transmembrane transporter activity	1	2	0.5	0.0215943	0.992668	0.919	1	A0A0D1CUC0_USTMA
biological_process	GO:0046942	carboxylic acid transport	1	2	0.5	0.0817182	0.978737	1	1	A0A0D1CUC0_USTMA
molecular_function	GO:0035064	methylated histone binding	1	4	0.25	0.764358	0.656609	1	1	A0A0D1CPX3_USTMA
molecular_function	GO:0000339	RNA cap binding	1	4	0.25	0.644346	0.660928	1	1	A0A0D1DTA6_USTMA
molecular_function	GO:0008251	tRNA-specific adenosine deaminase activity	1	2	0.5	0.945096	0.413916	1	1	A0A0D1D1T5_USTMA
biological_process	GO:0002100	tRNA wobble adenosine to inosine editing	1	1	1	1	0.244689	1	1	A0A0D1D1T5_USTMA
molecular_function	GO:0004066	asparagine synthase (glutamine-hydrolyzing) activity	1	2	0.5	0.945096	0.413916	1	1	A0A0D1DVU7_USTMA
biological_process	GO:0006529	asparagine biosynthetic process	1	2	0.5	0.940177	0.429556	1	1	A0A0D1DVU7_USTMA
cellular_component	GO:0016035	zeta DNA polymerase complex	1	2	0.5	0.946909	0.407925	1	1	A0A0D1E3V2_USTMA
biological_process	GO:0006882	cellular zinc ion homeostasis	1	3	0.333333	0.849758	0.569212	1	1	A0A0D1CH16_USTMA
molecular_function	GO:0030295	protein kinase activator activity	1	3	0.333333	0.23095	0.947258	1	1	A0A0D1CFM5_USTMA
cellular_component	GO:0031390	Ctf18 RFC-like complex	1	6	0.166667	0.580683	0.792627	1	1	A0A0D1BZ81_USTMA
molecular_function	GO:0004581	dolichyl-phosphate beta-glucosyltransferase activity	1	1	1	1	0.23441	1	1	A0A0D1E6X0_USTMA
biological_process	GO:0006621	protein retention in ER lumen	1	4	0.25	0.74727	0.674707	1	1	A0A0D1DTY6_USTMA
cellular_component	GO:0044614	nuclear pore cytoplasmic filaments	1	2	0.5	0.946909	0.407925	1	1	A0A0D1EAJ2_USTMA
cellular_component	GO:0033186	CAF-1 complex	1	2	0.5	0.946909	0.407925	1	1	A0A0D1CTS1_USTMA
molecular_function	GO:0008061	chitin binding	1	3	0.333333	0.860987	0.551367	1	1	A0A0D1DT94_USTMA
molecular_function	GO:0004568	chitinase activity	1	4	0.25	0.764358	0.656609	1	1	A0A0D1DT94_USTMA
molecular_function	GO:0001147	transcription termination site sequence-specific DNA binding	1	1	1	1	0.23441	1	1	A0A0D1DZJ5_USTMA
biological_process	GO:0006369	termination of RNA polymerase II transcription	1	5	0.2	0.546509	0.814568	1	1	A0A0D1DZJ5_USTMA
cellular_component	GO:0030123	AP-3 adaptor complex	1	3	0.333333	0.865164	0.544469	1	1	A0A0D1DWV8_USTMA
molecular_function	GO:0043812	phosphatidylinositol-4-phosphate phosphatase activity	1	3	0.333333	0.860987	0.551367	1	1	A0A0D1E449_USTMA
biological_process	GO:0006107	oxaloacetate metabolic process	1	2	0.5	0.940177	0.429556	1	1	A0A0D1BYF8_USTMA
molecular_function	GO:0016985	mannan endo-1,4-beta-mannosidase activity	1	2	0.5	0.945096	0.413916	1	1	A0A0D1E358_USTMA
biological_process	GO:0043162	ubiquitin-dependent protein catabolic process via the multivesicular body sorting pathway	1	1	1	0.602095	0.651528	1	1	A0A0D1E641_USTMA
biological_process	GO:0006656	phosphatidylcholine biosynthetic process	1	4	0.25	0.74727	0.674707	1	1	A0A0D1C5V4_USTMA
cellular_component	GO:0031499	TRAMP complex	1	1	1	1	0.230508	1	1	A0A0D1EA53_USTMA
molecular_function	GO:0017050	D-erythro-sphingosine kinase activity	1	2	0.5	0.945096	0.413916	1	1	A0A0D1DN85_USTMA
molecular_function	GO:0046873	metal ion transmembrane transporter activity	1	2	0.5	0.830211	0.267629	1	1	A0A0D1EB20_USTMA
molecular_function	GO:0008569	minus-end-directed microtubule motor activity	1	2	0.5	0.945096	0.413916	1	1	A0A0D1DZW2_USTMA
molecular_function	GO:0003847	1-alkyl-2-acetylglycerophosphocholine esterase activity	1	2	0.5	0.945096	0.413916	1	1	A0A0D1CZJ9_USTMA
molecular_function	GO:0016151	nickel cation binding	1	4	0.25	0.764358	0.656609	1	1	A0A0D1DV82_USTMA
biological_process	GO:0007234	osmosensory signaling via phosphorelay pathway	1	2	0.5	0.940177	0.429556	1	1	A0A0D1CFM5_USTMA
biological_process	GO:0000160	phosphorelay signal transduction system	1	5	0.2	0.83904	0.453491	1	1	A0A0D1CAE8_USTMA
biological_process	GO:0034058	endosomal vesicle fusion	1	4	0.25	0.74727	0.674707	1	1	A0A0D1DXQ1_USTMA
cellular_component	GO:0000333	telomerase catalytic core complex	1	1	1	1	0.230508	1	1	A0A0D1EAT9_USTMA
molecular_function	GO:0003721	telomerase RNA reverse transcriptase activity	1	1	1	1	0.23441	1	1	A0A0D1EAT9_USTMA
biological_process	GO:0010603	regulation of cytoplasmic mRNA processing body assembly	1	1	1	1	0.244689	1	1	A0A0D1DZ34_USTMA
cellular_component	GO:0005671	obsolete Ada2/Gcn5/Ada3 transcription activator complex	1	4	0.25	0.770771	0.649549	1	1	A0A0D1E2U9_USTMA
molecular_function	GO:0043682	P-type divalent copper transporter activity	1	2	0.5	0.945096	0.413916	1	1	A0A0D1EBR9_USTMA
molecular_function	GO:0004348	glucosylceramidase activity	1	2	0.5	0.945096	0.413916	1	1	A0A0D1CK77_USTMA
biological_process	GO:0006680	glucosylceramide catabolic process	1	2	0.5	0.940177	0.429556	1	1	A0A0D1CK77_USTMA
cellular_component	GO:0043227	membrane-bounded organelle	1	5	0.2	0.995254	0.00590129	1	0.603	A0A0D1C582_USTMA
biological_process	GO:0070291	N-acylethanolamine metabolic process	1	4	0.25	0.74727	0.674707	1	1	A0A0D1C582_USTMA
biological_process	GO:0070292	N-acylphosphatidylethanolamine metabolic process	1	4	0.25	0.74727	0.674707	1	1	A0A0D1C582_USTMA
cellular_component	GO:0032301	MutSalpha complex	1	2	0.5	0.946909	0.407925	1	1	A0A0D1CQ83_USTMA
biological_process	GO:0043570	maintenance of DNA repeat elements	1	2	0.5	0.74727	0.674707	1	1	A0A0D1CQ83_USTMA
cellular_component	GO:0034245	mitochondrial DNA-directed RNA polymerase complex	1	1	1	1	0.230508	1	1	A0A0D1E254_USTMA
molecular_function	GO:0001018	mitochondrial promoter sequence-specific DNA binding	1	1	1	1	0.23441	1	1	A0A0D1E254_USTMA
biological_process	GO:0006390	mitochondrial transcription	1	1	1	1	0.244689	1	1	A0A0D1E254_USTMA
biological_process	GO:0006108	malate metabolic process	1	4	0.25	0.74727	0.674707	1	1	A0A0D1E945_USTMA
molecular_function	GO:0003747	translation release factor activity	1	4	0.25	0.912366	0.334314	1	1	A0A0D1DZK4_USTMA
cellular_component	GO:0046930	pore complex	1	2	0.5	0.946909	0.407925	1	1	A0A0D1DSN1_USTMA
molecular_function	GO:0015288	porin activity	1	2	0.5	0.945096	0.413916	1	1	A0A0D1DSN1_USTMA
molecular_function	GO:0048029	monosaccharide binding	1	4	0.25	0.906844	0.282968	1	1	A0A0D1DZW1_USTMA
biological_process	GO:0006228	UTP biosynthetic process	1	5	0.2	0.644019	0.754388	1	1	A0A0D1DTC4_USTMA
molecular_function	GO:0048027	mRNA 5'-UTR binding	1	2	0.5	0.945096	0.413916	1	1	A0A0D1DNQ3_USTMA
molecular_function	GO:0033819	lipoyl(octanoyl) transferase activity	1	1	1	1	0.23441	1	1	A0A0D1E328_USTMA
molecular_function	GO:0102555	octanoyl transferase activity (acting on glycine-cleavage complex H protein)	1	1	1	1	0.23441	1	1	A0A0D1E328_USTMA
biological_process	GO:0009249	protein lipoylation	1	4	0.25	0.74727	0.674707	1	1	A0A0D1E328_USTMA
molecular_function	GO:0003995	acyl-CoA dehydrogenase activity	1	3	0.333333	0.484441	0.846083	1	1	A0A0D1DT90_USTMA
molecular_function	GO:0005254	chloride channel activity	1	3	0.333333	0.665686	0.737183	1	1	A0A0D1BWU3_USTMA
biological_process	GO:0006072	glycerol-3-phosphate metabolic process	1	3	0.333333	0.74727	0.674707	1	1	A0A0D1E978_USTMA
biological_process	GO:0000479	endonucleolytic cleavage of tricistronic rRNA transcript (SSU-rRNA, 5.8S rRNA, LSU-rRNA)	1	3	0.333333	0.480342	0.749797	1	1	A0A0D1DS67_USTMA
biological_process	GO:0006290	pyrimidine dimer repair	1	1	1	0.849758	0.569212	1	1	A0A0D1CQ83_USTMA
molecular_function	GO:0015174	basic amino acid transmembrane transporter activity	1	4	0.25	0.665686	0.737183	1	1	A0A0D1E3I5_USTMA
molecular_function	GO:0048038	quinone binding	1	4	0.25	0.717032	0.59309	1	1	A0A0D1C3J5_USTMA
cellular_component	GO:0005885	Arp2/3 protein complex	1	7	0.142857	0.494597	0.840498	1	1	A0A0D1DQB3_USTMA
biological_process	GO:0034314	Arp2/3 complex-mediated actin nucleation	1	7	0.142857	0.207878	0.954575	1	1	A0A0D1DQB3_USTMA
molecular_function	GO:0008495	protoheme IX farnesyltransferase activity	1	1	1	1	0.23441	1	1	A0A0D1CJ01_USTMA
biological_process	GO:0048034	heme O biosynthetic process	1	1	1	1	0.244689	1	1	A0A0D1CJ01_USTMA
biological_process	GO:1904161	DNA synthesis involved in UV-damage excision repair	1	1	1	1	0.244689	1	1	A0A0D1DX67_USTMA
molecular_function	GO:0017005	3'-tyrosyl-DNA phosphodiesterase activity	1	1	1	1	0.23441	1	1	A0A0D1CXM0_USTMA
biological_process	GO:0000012	single strand break repair	1	2	0.5	0.940177	0.429556	1	1	A0A0D1CXM0_USTMA
cellular_component	GO:0031902	late endosome membrane	1	3	0.333333	0.494597	0.840498	1	1	A0A0D1DR17_USTMA
molecular_function	GO:0008022	protein C-terminus binding	1	3	0.333333	0.860987	0.551367	1	1	A0A0D1DVC8_USTMA
biological_process	GO:0006409	tRNA export from nucleus	1	2	0.5	0.849758	0.569212	1	1	A0A0D1C533_USTMA
molecular_function	GO:0004828	serine-tRNA ligase activity	1	2	0.5	0.945096	0.413916	1	1	A0A0D1C3X4_USTMA
biological_process	GO:0070158	mitochondrial seryl-tRNA aminoacylation	1	1	1	1	0.244689	1	1	A0A0D1C3X4_USTMA
biological_process	GO:0006434	seryl-tRNA aminoacylation	1	2	0.5	0.940177	0.429556	1	1	A0A0D1C3X4_USTMA
molecular_function	GO:0003796	lysozyme activity	1	1	1	1	0.23441	1	1	A0A0D1CS69_USTMA
biological_process	GO:0016998	cell wall macromolecule catabolic process	1	1	1	0.99913	0.0143551	1	0.999	A0A0D1CS69_USTMA
biological_process	GO:0044275	cellular carbohydrate catabolic process	1	2	0.5	0.720267	0.459945	1	1	A0A0D1CS69_USTMA
biological_process	GO:0009253	peptidoglycan catabolic process	1	1	1	1	0.244689	1	1	A0A0D1CS69_USTMA
biological_process	GO:0051865	protein autoubiquitination	1	2	0.5	0.940177	0.429556	1	1	A0A0D1DYQ5_USTMA
cellular_component	GO:0005826	actomyosin contractile ring	1	3	0.333333	0.819755	0.415296	1	1	A0A0D1DUA6_USTMA
cellular_component	GO:0017109	glutamate-cysteine ligase complex	1	2	0.5	0.946909	0.407925	1	1	A0A0D1DWD8_USTMA
molecular_function	GO:0004357	glutamate-cysteine ligase activity	1	1	1	1	0.23441	1	1	A0A0D1DWD8_USTMA
biological_process	GO:0006750	glutathione biosynthetic process	1	2	0.5	0.940177	0.429556	1	1	A0A0D1DWD8_USTMA
biological_process	GO:0071108	protein K48-linked deubiquitination	1	2	0.5	0.940177	0.429556	1	1	A0A0D1BUU2_USTMA
molecular_function	GO:0030695	GTPase regulator activity	1	3	0.333333	0.999997	7.44172e-06	1	0.002	A0A0D1DVC8_USTMA
molecular_function	GO:0004059	aralkylamine N-acetyltransferase activity	1	1	1	1	0.23441	1	1	A0A0D1E892_USTMA
molecular_function	GO:0000298	endopolyphosphatase activity	1	2	0.5	0.945096	0.413916	1	1	A0A0D1E4H6_USTMA
molecular_function	GO:0004352	glutamate dehydrogenase (NAD+) activity	1	1	1	1	0.23441	1	1	A0A0D1DTH0_USTMA
biological_process	GO:0019551	glutamate catabolic process to 2-oxoglutarate	1	1	1	1	0.244689	1	1	A0A0D1DTH0_USTMA
molecular_function	GO:0045290	D-arabinose 1-dehydrogenase [NAD(P)+] activity	1	1	1	1	0.23441	1	1	A0A0D1CS00_USTMA
biological_process	GO:0070485	dehydro-D-arabinono-1,4-lactone biosynthetic process	1	1	1	1	0.244689	1	1	A0A0D1CS00_USTMA
molecular_function	GO:0016790	thiolester hydrolase activity	1	1	1	0.0987551	0.973058	1	1	A0A0D1CIQ8_USTMA
molecular_function	GO:0016889	endodeoxyribonuclease activity, producing 3'-phosphomonoesters	1	1	1	0.860987	0.551367	1	1	A0A0D1CM04_USTMA
biological_process	GO:0080090	regulation of primary metabolic process	1	1	1	0.99954	0.000685659	1	0.212	A0A0D1EAH3_USTMA
biological_process	GO:0045859	regulation of protein kinase activity	1	1	1	0.998361	0.0058401	1	0.932	A0A0D1EAH3_USTMA
biological_process	GO:0030388	fructose 1,6-bisphosphate metabolic process	1	2	0.5	0.940177	0.429556	1	1	A0A0D1DZW1_USTMA
biological_process	GO:0006002	fructose 6-phosphate metabolic process	1	4	0.25	0.74727	0.674707	1	1	A0A0D1DZW1_USTMA
biological_process	GO:0006000	fructose metabolic process	1	4	0.25	0.74727	0.674707	1	1	A0A0D1E4A1_USTMA
biological_process	GO:0051973	positive regulation of telomerase activity	1	2	0.5	0.940177	0.429556	1	1	A0A0D1C0Z7_USTMA
cellular_component	GO:0005658	alpha DNA polymerase:primase complex	1	4	0.25	0.770771	0.649549	1	1	A0A0D1DYS5_USTMA
molecular_function	GO:0008977	prephenate dehydrogenase (NAD+) activity	1	1	1	1	0.23441	1	1	A0A0D1DTR5_USTMA
molecular_function	GO:0004665	prephenate dehydrogenase (NADP+) activity	1	1	1	1	0.23441	1	1	A0A0D1DTR5_USTMA
biological_process	GO:0006571	tyrosine biosynthetic process	1	2	0.5	0.940177	0.429556	1	1	A0A0D1DTR5_USTMA
biological_process	GO:0008655	pyrimidine-containing compound salvage	1	3	0.333333	0.849758	0.569212	1	1	A0A0D1E8Z9_USTMA
molecular_function	GO:0052735	tRNA (cytosine-3-)-methyltransferase activity	1	1	1	1	0.23441	1	1	A0A0D1C1G5_USTMA
biological_process	GO:0042732	D-xylose metabolic process	1	2	0.5	0.849758	0.569212	1	1	A0A0D1CWJ4_USTMA
cellular_component	GO:0005782	peroxisomal matrix	1	8	0.125	0.417305	0.877327	1	1	A0A0D1E299_USTMA
biological_process	GO:0009074	aromatic amino acid family catabolic process	1	1	1	0.927066	0.192516	1	1	A0A0D1EB74_USTMA
molecular_function	GO:0097367	carbohydrate derivative binding	1	2	0.5	0.999787	0.000307014	1	0.058	A0A0D1C741_USTMA
biological_process	GO:1901135	carbohydrate derivative metabolic process	1	1	1	0.0053507	0.996638	0.658	1	A0A0D1C741_USTMA
molecular_function	GO:0003960	NADPH:quinone reductase activity	1	2	0.5	0.945096	0.413916	1	1	A0A0D1CH46_USTMA
biological_process	GO:0051293	establishment of spindle localization	1	2	0.5	0.83904	0.453491	1	1	A0A0D1DUD4_USTMA
molecular_function	GO:0004827	proline-tRNA ligase activity	1	2	0.5	0.945096	0.413916	1	1	A0A0D1DMP6_USTMA
biological_process	GO:0006433	prolyl-tRNA aminoacylation	1	2	0.5	0.940177	0.429556	1	1	A0A0D1DMP6_USTMA
biological_process	GO:0000083	regulation of transcription involved in G1/S transition of mitotic cell cycle	1	3	0.333333	0.312961	0.920244	1	1	A0A0D1BYN7_USTMA
molecular_function	GO:0008420	RNA polymerase II CTD heptapeptide repeat phosphatase activity	1	3	0.333333	0.860987	0.551367	1	1	A0A0D1ED52_USTMA
biological_process	GO:0070940	dephosphorylation of RNA polymerase II C-terminal domain	1	3	0.333333	0.849758	0.569212	1	1	A0A0D1ED52_USTMA
cellular_component	GO:0098753	anchored component of the cytoplasmic side of the plasma membrane	1	1	1	1	0.230508	1	1	A0A0D1EBL3_USTMA
cellular_component	GO:0120104	mitotic actomyosin contractile ring, proximal layer	1	1	1	1	0.230508	1	1	A0A0D1EBL3_USTMA
biological_process	GO:1903476	protein localization to cell division site involved in mitotic actomyosin contractile ring assembly	1	1	1	1	0.244689	1	1	A0A0D1EBL3_USTMA
molecular_function	GO:0004563	beta-N-acetylhexosaminidase activity	1	2	0.5	0.945096	0.413916	1	1	A0A0D1DY62_USTMA
molecular_function	GO:0102148	N-acetyl-beta-D-galactosaminidase activity	1	2	0.5	0.945096	0.413916	1	1	A0A0D1DY62_USTMA
cellular_component	GO:0005846	nuclear cap binding complex	1	2	0.5	0.946909	0.407925	1	1	A0A0D1DTA6_USTMA
molecular_function	GO:0070012	oligopeptidase activity	1	1	1	1	0.23441	1	1	A0A0D1CH35_USTMA
molecular_function	GO:0061863	microtubule plus end polymerase	1	1	1	1	0.23441	1	1	A0A0D1CA73_USTMA
biological_process	GO:0030951	establishment or maintenance of microtubule cytoskeleton polarity	1	1	1	1	0.244689	1	1	A0A0D1CA73_USTMA
biological_process	GO:0046785	microtubule polymerization	1	1	1	0.471573	0.792122	1	1	A0A0D1CA73_USTMA
biological_process	GO:0000917	division septum assembly	1	1	1	0.458112	0.860014	1	1	A0A0D1DR37_USTMA
molecular_function	GO:0004180	carboxypeptidase activity	1	2	0.5	0.811336	0.427222	1	1	A0A0D1E195_USTMA
molecular_function	GO:0000095	S-adenosyl-L-methionine transmembrane transporter activity	1	2	0.5	0.945096	0.413916	1	1	A0A0D1DSC1_USTMA
molecular_function	GO:0016603	glutaminyl-peptide cyclotransferase activity	1	1	1	1	0.23441	1	1	A0A0D1CFS0_USTMA
biological_process	GO:0017186	peptidyl-pyroglutamic acid biosynthetic process, using glutaminyl-peptide cyclotransferase	1	1	1	1	0.244689	1	1	A0A0D1CFS0_USTMA
molecular_function	GO:0000340	RNA 7-methylguanosine cap binding	1	5	0.2	0.665686	0.737183	1	1	A0A0D1E4L2_USTMA
biological_process	GO:0043547	positive regulation of GTPase activity	1	2	0.5	0.540024	0.703769	1	1	A0A0D1CD33_USTMA
biological_process	GO:0051056	regulation of small GTPase mediated signal transduction	1	1	1	0.966001	0.102136	1	1	A0A0D1CD33_USTMA
biological_process	GO:0051276	chromosome organization	1	2	0.5	0.987819	0.0178781	1	1	A0A0D1DSI0_USTMA
cellular_component	GO:0005945	6-phosphofructokinase complex	1	1	1	1	0.230508	1	1	A0A0D1DZW1_USTMA
molecular_function	GO:0003872	6-phosphofructokinase activity	1	1	1	1	0.23441	1	1	A0A0D1DZW1_USTMA
molecular_function	GO:0070095	fructose-6-phosphate binding	1	1	1	1	0.23441	1	1	A0A0D1DZW1_USTMA
biological_process	GO:0061621	canonical glycolysis	1	2	0.5	0.940177	0.429556	1	1	A0A0D1DZW1_USTMA
cellular_component	GO:0051285	cell cortex of cell tip	1	5	0.2	0.795897	0.505403	1	1	A0A0D1EDP6_USTMA
biological_process	GO:0001522	pseudouridine synthesis	1	3	0.333333	0.602095	0.651528	1	1	A0A0D1CPZ3_USTMA
biological_process	GO:0051307	meiotic chromosome separation	1	1	1	0.982396	0.0718089	1	1	A0A0D1E266_USTMA
biological_process	GO:0009263	deoxyribonucleotide biosynthetic process	1	2	0.5	0.83904	0.453491	1	1	A0A0D1DSD0_USTMA
molecular_function	GO:0032977	membrane insertase activity	1	3	0.333333	0.860987	0.551367	1	1	A0A0D1E6E5_USTMA
biological_process	GO:0051205	protein insertion into membrane	1	2	0.5	0.28001	0.879269	1	1	A0A0D1E6E5_USTMA
molecular_function	GO:0004698	calcium-dependent protein kinase C activity	1	1	1	1	0.23441	1	1	A0A0D1DRE2_USTMA
biological_process	GO:0031468	nuclear membrane reassembly	1	2	0.5	0.940177	0.429556	1	1	A0A0D1DZ73_USTMA
molecular_function	GO:0008131	primary amine oxidase activity	1	2	0.5	0.945096	0.413916	1	1	A0A0D1C3J5_USTMA
biological_process	GO:0009308	amine metabolic process	1	2	0.5	0.676201	0.507996	1	1	A0A0D1C3J5_USTMA
biological_process	GO:0019287	isopentenyl diphosphate biosynthetic process, mevalonate pathway	1	2	0.5	0.849758	0.569212	1	1	A0A0D1EDT9_USTMA
biological_process	GO:0031032	actomyosin structure organization	1	1	1	0.72802	0.528427	1	1	A0A0D1DU66_USTMA
molecular_function	GO:0004671	protein C-terminal S-isoprenylcysteine carboxyl O-methyltransferase activity	1	2	0.5	0.945096	0.413916	1	1	A0A0D1CAQ9_USTMA
cellular_component	GO:0034506	chromosome, centromeric core domain	1	2	0.5	0.946909	0.407925	1	1	A0A0D1D1W6_USTMA
cellular_component	GO:0034992	microtubule organizing center attachment site	1	1	1	0.946909	0.407925	1	1	A0A0D1D1W6_USTMA
biological_process	GO:0071765	nuclear inner membrane organization	1	1	1	1	0.244689	1	1	A0A0D1D1W6_USTMA
biological_process	GO:0034088	maintenance of mitotic sister chromatid cohesion	1	1	1	1	0.244689	1	1	A0A0D1BZ81_USTMA
molecular_function	GO:0046556	alpha-L-arabinofuranosidase activity	1	3	0.333333	0.860987	0.551367	1	1	A0A0D1BZQ4_USTMA
biological_process	GO:0046373	L-arabinose metabolic process	1	3	0.333333	0.849758	0.569212	1	1	A0A0D1BZQ4_USTMA
molecular_function	GO:0003988	acetyl-CoA C-acyltransferase activity	1	2	0.5	0.571232	0.798866	1	1	A0A0D1E6H3_USTMA
biological_process	GO:0010124	phenylacetate catabolic process	1	2	0.5	0.940177	0.429556	1	1	A0A0D1E6H3_USTMA
molecular_function	GO:0009931	calcium-dependent protein serine/threonine kinase activity	1	1	1	1	0.0549036	1	1	A0A0D1DTH1_USTMA
biological_process	GO:0001934	positive regulation of protein phosphorylation	1	2	0.5	0.99114	0.0447065	1	1	A0A0D1E2D4_USTMA
biological_process	GO:1903259	exon-exon junction complex disassembly	1	1	1	1	0.244689	1	1	A0A0D1DW43_USTMA
biological_process	GO:0032786	positive regulation of DNA-templated transcription, elongation	1	4	0.25	0.210099	0.931035	1	1	A0A0D1ECQ1_USTMA
biological_process	GO:0051256	mitotic spindle midzone assembly	1	1	1	1	0.244689	1	1	A0A0D1E377_USTMA
molecular_function	GO:0005102	signaling receptor binding	1	2	0.5	0.40691	0.882225	1	1	A0A0D1E5X2_USTMA
biological_process	GO:0006337	nucleosome disassembly	1	1	1	1	0.244689	1	1	A0A0D1DXZ0_USTMA
molecular_function	GO:0004631	phosphomevalonate kinase activity	1	1	1	1	0.23441	1	1	A0A0D1EDT9_USTMA
molecular_function	GO:0034658	isopropylmalate transmembrane transporter activity	1	1	1	1	0.23441	1	1	A0A0D1CNB0_USTMA
molecular_function	GO:1901239	malonate(1-) transmembrane transporter activity	1	1	1	1	0.23441	1	1	A0A0D1CNB0_USTMA
molecular_function	GO:0003885	D-arabinono-1,4-lactone oxidase activity	1	1	1	1	0.23441	1	1	A0A0D1E6T7_USTMA
biological_process	GO:0045016	mitochondrial magnesium ion transmembrane transport	1	1	1	1	0.244689	1	1	A0A0D1C1B5_USTMA
biological_process	GO:0090522	vesicle tethering involved in exocytosis	1	2	0.5	0.940177	0.429556	1	1	A0A0D1DRH1_USTMA
biological_process	GO:0000729	DNA double-strand break processing	1	1	1	0.902147	0.355981	1	1	A0A0D1CPS3_USTMA
biological_process	GO:0009653	anatomical structure morphogenesis	1	1	1	0.264941	0.87416	1	1	A0A0D1BUZ6_USTMA
molecular_function	GO:0015250	water channel activity	1	2	0.5	0.945096	0.413916	1	1	A0A0D1CQG6_USTMA
molecular_function	GO:0017176	phosphatidylinositol N-acetylglucosaminyltransferase activity	1	3	0.333333	0.860987	0.551367	1	1	A0A0D1EBQ5_USTMA
molecular_function	GO:0030942	endoplasmic reticulum signal peptide binding	1	3	0.333333	0.860987	0.551367	1	1	A0A0D1CDU8_USTMA
molecular_function	GO:0004578	chitobiosyldiphosphodolichol beta-mannosyltransferase activity	1	1	1	1	0.23441	1	1	A0A0D1CLF4_USTMA
cellular_component	GO:1902929	plasma membrane of growing cell tip	1	1	1	1	0.230508	1	1	A0A0D1C9X8_USTMA
biological_process	GO:0061161	positive regulation of establishment of bipolar cell polarity regulating cell shape	1	1	1	1	0.244689	1	1	A0A0D1C9X8_USTMA
cellular_component	GO:0016281	eukaryotic translation initiation factor 4F complex	1	3	0.333333	0.865164	0.544469	1	1	A0A0D1DU52_USTMA
molecular_function	GO:0004043	L-aminoadipate-semialdehyde dehydrogenase activity	1	1	1	1	0.23441	1	1	A0A0D1CBC4_USTMA
molecular_function	GO:0005047	signal recognition particle binding	1	2	0.5	0.945096	0.413916	1	1	A0A0D1CDU8_USTMA
biological_process	GO:0060623	regulation of chromosome condensation	1	1	1	0.849758	0.569212	1	1	A0A0D1CLP1_USTMA
biological_process	GO:0071922	regulation of cohesin loading	1	1	1	1	0.0598232	1	1	A0A0D1CLP1_USTMA
molecular_function	GO:0000828	inositol hexakisphosphate kinase activity	1	2	0.5	0.945096	0.413916	1	1	A0A0D1E9A4_USTMA
molecular_function	GO:0017136	NAD-dependent histone deacetylase activity	1	3	0.333333	0.484441	0.846083	1	1	A0A0D1DSY4_USTMA
molecular_function	GO:0046970	NAD-dependent histone deacetylase activity (H4-K16 specific)	1	2	0.5	0.945096	0.413916	1	1	A0A0D1DSY4_USTMA
molecular_function	GO:0004849	uridine kinase activity	1	1	1	1	0.23441	1	1	A0A0D1E8Z9_USTMA
biological_process	GO:0044211	CTP salvage	1	1	1	1	0.244689	1	1	A0A0D1E8Z9_USTMA
biological_process	GO:0044206	UMP salvage	1	1	1	1	0.244689	1	1	A0A0D1E8Z9_USTMA
biological_process	GO:0050708	regulation of protein secretion	1	2	0.5	0.940177	0.429556	1	1	A0A0D1BZG9_USTMA
cellular_component	GO:0048476	Holliday junction resolvase complex	1	2	0.5	0.946909	0.407925	1	1	A0A0D1E1Y0_USTMA
cellular_component	GO:0035371	microtubule plus-end	1	3	0.333333	0.865164	0.544469	1	1	A0A0D1DVE7_USTMA
molecular_function	GO:0015355	secondary active monocarboxylate transmembrane transporter activity	1	1	1	0.945096	0.413916	1	1	A0A0D1CUC0_USTMA
biological_process	GO:0035879	plasma membrane lactate transport	1	1	1	1	0.244689	1	1	A0A0D1CUC0_USTMA
cellular_component	GO:0005785	signal recognition particle receptor complex	1	2	0.5	0.946909	0.407925	1	1	A0A0D1CIZ5_USTMA
molecular_function	GO:0046899	nucleoside triphosphate adenylate kinase activity	1	1	1	1	0.23441	1	1	A0A0D1CGU1_USTMA
biological_process	GO:0046039	GTP metabolic process	1	1	1	0.644019	0.754388	1	1	A0A0D1CGU1_USTMA
biological_process	GO:0046041	ITP metabolic process	1	1	1	1	0.244689	1	1	A0A0D1CGU1_USTMA
biological_process	GO:0009142	nucleoside triphosphate biosynthetic process	1	1	1	0.320524	0.827173	1	1	A0A0D1CGU1_USTMA
cellular_component	GO:0005971	ribonucleoside-diphosphate reductase complex	1	1	1	1	0.230508	1	1	A0A0D1DSD0_USTMA
molecular_function	GO:0004748	ribonucleoside-diphosphate reductase activity, thioredoxin disulfide as acceptor	1	1	1	1	0.23441	1	1	A0A0D1DSD0_USTMA
molecular_function	GO:0008157	protein phosphatase 1 binding	1	2	0.5	0.945096	0.413916	1	1	A0A0D1CAG9_USTMA
molecular_function	GO:1990699	palmitoleyl hydrolase activity	1	2	0.5	0.945096	0.413916	1	1	A0A0D1DNN3_USTMA
biological_process	GO:0090090	negative regulation of canonical Wnt signaling pathway	1	2	0.5	0.940177	0.429556	1	1	A0A0D1DNN3_USTMA
biological_process	GO:1990697	protein depalmitoleylation	1	2	0.5	0.940177	0.429556	1	1	A0A0D1DNN3_USTMA
biological_process	GO:0051999	mannosyl-inositol phosphorylceramide biosynthetic process	1	1	1	1	0.244689	1	1	A0A0D1CV69_USTMA
cellular_component	GO:0009898	cytoplasmic side of plasma membrane	1	3	0.333333	0.453049	0.802394	1	1	A0A0D1DZX0_USTMA
biological_process	GO:0033567	DNA replication, Okazaki fragment processing	1	1	1	0.940177	0.429556	1	1	A0A0D1DTM4_USTMA
molecular_function	GO:0008902	hydroxymethylpyrimidine kinase activity	1	1	1	1	0.23441	1	1	A0A0D1DY58_USTMA
molecular_function	GO:0008972	phosphomethylpyrimidine kinase activity	1	1	1	1	0.23441	1	1	A0A0D1DY58_USTMA
molecular_function	GO:0016314	phosphatidylinositol-3,4,5-trisphosphate 3-phosphatase activity	1	1	1	1	0.23441	1	1	A0A0D1E0C2_USTMA
biological_process	GO:0014065	phosphatidylinositol 3-kinase signaling	1	1	1	1	0.244689	1	1	A0A0D1E0C2_USTMA
biological_process	GO:0051896	regulation of protein kinase B signaling	1	1	1	1	0.244689	1	1	A0A0D1E0C2_USTMA
cellular_component	GO:0090694	Scc2-Scc4 cohesin loading complex	1	1	1	1	0.230508	1	1	A0A0D1DWG5_USTMA
biological_process	GO:0034087	establishment of mitotic sister chromatid cohesion	1	1	1	1	0.244689	1	1	A0A0D1DWG5_USTMA
biological_process	GO:0071169	establishment of protein localization to chromatin	1	1	1	1	0.244689	1	1	A0A0D1DWG5_USTMA
biological_process	GO:1905406	positive regulation of mitotic cohesin loading	1	1	1	1	0.244689	1	1	A0A0D1DWG5_USTMA
molecular_function	GO:0003873	6-phosphofructo-2-kinase activity	1	2	0.5	0.945096	0.413916	1	1	A0A0D1E4A1_USTMA
molecular_function	GO:0004331	fructose-2,6-bisphosphate 2-phosphatase activity	1	2	0.5	0.945096	0.413916	1	1	A0A0D1E4A1_USTMA
biological_process	GO:0006003	fructose 2,6-bisphosphate metabolic process	1	2	0.5	0.940177	0.429556	1	1	A0A0D1E4A1_USTMA
cellular_component	GO:0031304	intrinsic component of mitochondrial inner membrane	1	2	0.5	0.467421	0.716181	1	1	A0A0D1C5I7_USTMA
cellular_component	GO:0030061	mitochondrial crista	1	1	1	1	0.230508	1	1	A0A0D1C5I7_USTMA
cellular_component	GO:0097002	mitochondrial inner boundary membrane	1	1	1	1	0.230508	1	1	A0A0D1C5I7_USTMA
molecular_function	GO:1901612	cardiolipin binding	1	1	1	1	0.23441	1	1	A0A0D1C5I7_USTMA
molecular_function	GO:0070300	phosphatidic acid binding	1	1	1	1	0.23441	1	1	A0A0D1C5I7_USTMA
molecular_function	GO:0001786	phosphatidylserine binding	1	1	1	1	0.23441	1	1	A0A0D1C5I7_USTMA
biological_process	GO:0034488	basic amino acid transmembrane export from vacuole	1	1	1	1	0.244689	1	1	A0A0D1E3I5_USTMA
biological_process	GO:0010971	positive regulation of G2/M transition of mitotic cell cycle	1	2	0.5	0.849758	0.569212	1	1	A0A0D1E0F1_USTMA
molecular_function	GO:0036456	L-methionine-(S)-S-oxide reductase activity	1	1	1	1	0.23441	1	1	A0A0D1CWC2_USTMA
molecular_function	GO:0008113	peptide-methionine (S)-S-oxide reductase activity	1	1	1	1	0.23441	1	1	A0A0D1CWC2_USTMA
molecular_function	GO:0080132	fatty acid alpha-hydroxylase activity	1	1	1	1	0.23441	1	1	A0A0D1DV12_USTMA
biological_process	GO:0060988	lipid tube assembly	1	1	1	1	0.244689	1	1	A0A0D1CRQ3_USTMA
molecular_function	GO:0031418	L-ascorbic acid binding	1	1	1	1	0.23441	1	1	A0A0D1E4T3_USTMA
molecular_function	GO:0031543	peptidyl-proline dioxygenase activity	1	1	1	1	0.23441	1	1	A0A0D1E4T3_USTMA
biological_process	GO:0019511	peptidyl-proline hydroxylation	1	1	1	1	0.244689	1	1	A0A0D1E4T3_USTMA
molecular_function	GO:0061503	tRNA threonylcarbamoyladenosine dehydratase	1	1	1	1	0.23441	1	1	A0A0D1DSU9_USTMA
molecular_function	GO:0008641	ubiquitin-like modifier activating enzyme activity	1	1	1	0.717032	0.59309	1	1	A0A0D1DSU9_USTMA
biological_process	GO:0061504	cyclic threonylcarbamoyladenosine biosynthetic process	1	1	1	1	0.244689	1	1	A0A0D1DSU9_USTMA
molecular_function	GO:0004608	phosphatidylethanolamine N-methyltransferase activity	1	1	1	1	0.23441	1	1	A0A0D1C5V4_USTMA
biological_process	GO:0006090	pyruvate metabolic process	1	2	0.5	0.0995128	0.972979	1	1	A0A0D1E588_USTMA
cellular_component	GO:0019185	snRNA-activating protein complex	1	1	1	1	0.230508	1	1	A0A0D1CFB4_USTMA
molecular_function	GO:0003681	bent DNA binding	1	1	1	1	0.23441	1	1	A0A0D1CFB4_USTMA
molecular_function	GO:0001006	RNA polymerase III type 3 promoter sequence-specific DNA binding	1	3	0.333333	0.860987	0.551367	1	1	A0A0D1CFB4_USTMA
biological_process	GO:0042795	snRNA transcription by RNA polymerase II	1	1	1	1	0.244689	1	1	A0A0D1CFB4_USTMA
biological_process	GO:0042796	snRNA transcription by RNA polymerase III	1	1	1	1	0.244689	1	1	A0A0D1CFB4_USTMA
cellular_component	GO:0032797	SMN complex	1	2	0.5	0.946909	0.407925	1	1	A0A0D1CGN6_USTMA
molecular_function	GO:0003952	NAD+ synthase (glutamine-hydrolyzing) activity	1	1	1	1	0.23441	1	1	A0A0D1CPD0_USTMA
cellular_component	GO:0031511	Mis6-Sim4 complex	1	1	1	1	0.230508	1	1	A0A0D1DW01_USTMA
biological_process	GO:0042742	defense response to bacterium	1	1	1	1	0.244689	1	1	A0A0D1CY78_USTMA
biological_process	GO:0050832	defense response to fungus	1	1	1	1	0.244689	1	1	A0A0D1CY78_USTMA
molecular_function	GO:0001002	RNA polymerase III type 1 promoter sequence-specific DNA binding	1	1	1	1	0.23441	1	1	A0A0D1BVP4_USTMA
cellular_component	GO:0030136	clathrin-coated vesicle	1	3	0.333333	0.946133	0.141225	1	1	A0A0D1E2P1_USTMA
molecular_function	GO:0004070	aspartate carbamoyltransferase activity	1	2	0.5	0.945096	0.413916	1	1	A0A0D1DTC4_USTMA
cellular_component	GO:0140445	chromosome, telomeric repeat region	1	2	0.5	0.865164	0.544469	1	1	A0A0D1DS61_USTMA
biological_process	GO:0044778	meiotic DNA integrity checkpoint signaling	1	1	1	1	0.244689	1	1	A0A0D1DS61_USTMA
biological_process	GO:0000493	box H/ACA snoRNP assembly	1	2	0.5	0.940177	0.429556	1	1	A0A0D1CPZ3_USTMA
biological_process	GO:0009410	response to xenobiotic stimulus	1	1	1	0.902147	0.355981	1	1	A0A0D1E3B1_USTMA
molecular_function	GO:0001965	G-protein alpha-subunit binding	1	2	0.5	0.945096	0.413916	1	1	A0A0D1DTD9_USTMA
molecular_function	GO:0005092	GDP-dissociation inhibitor activity	1	3	0.333333	0.9431	0.211789	1	1	A0A0D1E1H8_USTMA
molecular_function	GO:0043743	LPPG:FO 2-phospho-L-lactate transferase activity	1	1	1	1	0.23441	1	1	A0A0D1CWF0_USTMA
molecular_function	GO:0004077	biotin-[acetyl-CoA-carboxylase] ligase activity	1	1	1	1	0.23441	1	1	A0A0D1CNK9_USTMA
biological_process	GO:0009305	protein biotinylation	1	1	1	1	0.244689	1	1	A0A0D1CNK9_USTMA
molecular_function	GO:0008308	voltage-gated anion channel activity	1	1	1	0.860987	0.551367	1	1	A0A0D1DSN1_USTMA
molecular_function	GO:0003877	ATP adenylyltransferase activity	1	1	1	1	0.23441	1	1	A0A0D1C4Z5_USTMA
molecular_function	GO:0008796	bis(5'-nucleosyl)-tetraphosphatase activity	1	1	1	1	0.23441	1	1	A0A0D1C4Z5_USTMA
molecular_function	GO:0004780	sulfate adenylyltransferase (ADP) activity	1	1	1	1	0.23441	1	1	A0A0D1C4Z5_USTMA
biological_process	GO:0009164	nucleoside catabolic process	1	1	1	0.458112	0.860014	1	1	A0A0D1C4Z5_USTMA
biological_process	GO:0009165	nucleotide biosynthetic process	1	1	1	0.0761981	0.955907	1	1	A0A0D1C4Z5_USTMA
molecular_function	GO:0035539	8-oxo-7,8-dihydrodeoxyguanosine triphosphate pyrophosphatase activity	1	1	1	1	0.23441	1	1	A0A0D1C4Q5_USTMA
biological_process	GO:0006203	dGTP catabolic process	1	1	1	1	0.244689	1	1	A0A0D1C4Q5_USTMA
molecular_function	GO:0070577	lysine-acetylated histone binding	1	1	1	1	0.23441	1	1	A0A0D1CB29_USTMA
molecular_function	GO:0016504	peptidase activator activity	1	1	1	0.860987	0.551367	1	1	A0A0D1CB29_USTMA
biological_process	GO:0071562	nucleus-vacuole junction assembly	1	1	1	1	0.244689	1	1	A0A0D1EA30_USTMA
biological_process	GO:0000011	vacuole inheritance	1	1	1	1	0.244689	1	1	A0A0D1EA30_USTMA
molecular_function	GO:0004651	polynucleotide 5'-phosphatase activity	1	1	1	1	0.23441	1	1	A0A0D1DYL2_USTMA
biological_process	GO:0098507	polynucleotide 5' dephosphorylation	1	1	1	1	0.244689	1	1	A0A0D1DYL2_USTMA
molecular_function	GO:0004735	pyrroline-5-carboxylate reductase activity	1	1	1	1	0.23441	1	1	A0A0D1D180_USTMA
molecular_function	GO:0050203	oxalate-CoA ligase activity	1	1	1	1	0.23441	1	1	A0A0D1E299_USTMA
biological_process	GO:0033611	oxalate catabolic process	1	1	1	1	0.244689	1	1	A0A0D1E299_USTMA
molecular_function	GO:0004420	hydroxymethylglutaryl-CoA reductase (NADPH) activity	1	1	1	1	0.23441	1	1	A0A0D1E3E8_USTMA
biological_process	GO:0015936	coenzyme A metabolic process	1	1	1	0.893637	0.308178	1	1	A0A0D1E3E8_USTMA
cellular_component	GO:1990816	vacuole-mitochondrion membrane contact site	1	1	1	1	0.230508	1	1	A0A0D1CH16_USTMA
molecular_function	GO:1903135	cupric ion binding	1	1	1	1	0.23441	1	1	A0A0D1CH16_USTMA
biological_process	GO:0030026	cellular manganese ion homeostasis	1	3	0.333333	0.849758	0.569212	1	1	A0A0D1CH16_USTMA
biological_process	GO:1902657	protein localization to prospore membrane	1	1	1	1	0.244689	1	1	A0A0D1BZH3_USTMA
molecular_function	GO:0009374	biotin binding	1	1	1	1	0.23441	1	1	A0A0D1E588_USTMA
molecular_function	GO:0004736	pyruvate carboxylase activity	1	1	1	1	0.23441	1	1	A0A0D1E588_USTMA
biological_process	GO:0006282	regulation of DNA repair	1	1	1	0.849758	0.569212	1	1	A0A0D1C325_USTMA
molecular_function	GO:0016758	hexosyltransferase activity	1	2	0.5	0.95576	0.0811699	1	1	A0A0D1DZW9_USTMA
cellular_component	GO:0005746	mitochondrial respirasome	1	1	1	0.0150029	0.99818	0.675	1	A0A0D1CMC7_USTMA
biological_process	GO:0046354	mannan biosynthetic process	1	1	1	1	0.244689	1	1	A0A0D1E6S4_USTMA
biological_process	GO:0035268	protein mannosylation	1	1	1	0.255823	0.939806	1	1	A0A0D1E6S4_USTMA
molecular_function	GO:0004856	xylulokinase activity	1	1	1	1	0.23441	1	1	A0A0D1CWJ4_USTMA
biological_process	GO:0005997	xylulose metabolic process	1	1	1	1	0.244689	1	1	A0A0D1CWJ4_USTMA
molecular_function	GO:0004335	galactokinase activity	1	1	1	1	0.23441	1	1	A0A0D1E3Y9_USTMA
biological_process	GO:0006012	galactose metabolic process	1	1	1	0.902147	0.355981	1	1	A0A0D1E3Y9_USTMA
molecular_function	GO:0018024	histone-lysine N-methyltransferase activity	1	2	0.5	0.9431	0.211789	1	1	A0A0D1E0A0_USTMA
biological_process	GO:0034968	histone lysine methylation	1	1	1	0.893637	0.308178	1	1	A0A0D1E0A0_USTMA
biological_process	GO:0048268	clathrin coat assembly	1	3	0.333333	0.849758	0.569212	1	1	A0A0D1E2P1_USTMA
biological_process	GO:0046177	D-gluconate catabolic process	1	2	0.5	0.940177	0.429556	1	1	A0A0D1DZG2_USTMA
cellular_component	GO:0045239	tricarboxylic acid cycle enzyme complex	1	1	1	0.516862	0.75982	1	1	A0A0D1E945_USTMA
molecular_function	GO:0004333	fumarate hydratase activity	1	1	1	1	0.23441	1	1	A0A0D1E945_USTMA
molecular_function	GO:0004488	methylenetetrahydrofolate dehydrogenase (NADP+) activity	1	2	0.5	0.945096	0.413916	1	1	A0A0D1E2B8_USTMA
biological_process	GO:0010992	ubiquitin recycling	1	2	0.5	0.940177	0.429556	1	1	A0A0D1DYL9_USTMA
biological_process	GO:0015074	DNA integration	1	3	0.333333	0.74727	0.674707	1	1	A0A0D1DPX6_USTMA
molecular_function	GO:0004814	arginine-tRNA ligase activity	1	1	1	1	0.23441	1	1	A0A0D1CV38_USTMA
biological_process	GO:0006420	arginyl-tRNA aminoacylation	1	1	1	1	0.244689	1	1	A0A0D1CV38_USTMA
biological_process	GO:0015786	UDP-glucose transmembrane transport	1	1	1	1	0.244689	1	1	A0A0D1CHT8_USTMA
molecular_function	GO:0008798	beta-aspartyl-peptidase activity	1	1	1	1	0.23441	1	1	A0A0D1DVX3_USTMA
molecular_function	GO:0032050	clathrin heavy chain binding	1	2	0.5	0.945096	0.413916	1	1	A0A0D1E2P1_USTMA
biological_process	GO:0002128	tRNA nucleoside ribose methylation	1	1	1	1	0.244689	1	1	A0A0D1CBR1_USTMA
molecular_function	GO:0033149	FFAT motif binding	1	1	1	1	0.23441	1	1	A0A0D1CVI3_USTMA
biological_process	GO:0090158	endoplasmic reticulum membrane organization	1	1	1	1	0.0598232	1	1	A0A0D1CVI3_USTMA
biological_process	GO:0000448	cleavage in ITS2 between 5.8S rRNA and LSU-rRNA of tricistronic rRNA transcript (SSU-rRNA, 5.8S rRNA, LSU-rRNA)	1	1	1	1	0.244689	1	1	A0A0D1CIK4_USTMA
biological_process	GO:1902476	chloride transmembrane transport	1	2	0.5	0.940177	0.429556	1	1	A0A0D1DUV7_USTMA
biological_process	GO:0032185	septin cytoskeleton organization	1	1	1	0.952246	0.25273	1	1	A0A0D1E1L9_USTMA
cellular_component	GO:0070461	SAGA-type complex	1	1	1	0.891534	0.250815	1	1	A0A0D1E2U9_USTMA
biological_process	GO:0035066	positive regulation of histone acetylation	1	1	1	1	0.244689	1	1	A0A0D1E2U9_USTMA
molecular_function	GO:0004691	cAMP-dependent protein kinase activity	1	2	0.5	0.945096	0.413916	1	1	A0A0D1E5D9_USTMA
molecular_function	GO:0016807	cysteine-type carboxypeptidase activity	1	1	1	1	0.23441	1	1	A0A0D1BUU2_USTMA
molecular_function	GO:1990380	Lys48-specific deubiquitinase activity	1	1	1	1	0.23441	1	1	A0A0D1BUU2_USTMA
biological_process	GO:0051259	protein complex oligomerization	1	2	0.5	0.902147	0.355981	1	1	A0A0D1DU35_USTMA
cellular_component	GO:0005934	cellular bud tip	1	1	1	1	0.230508	1	1	A0A0D1BZG9_USTMA
biological_process	GO:0007118	budding cell apical bud growth	1	1	1	0.940177	0.429556	1	1	A0A0D1BZG9_USTMA
biological_process	GO:0060237	regulation of fungal-type cell wall organization	1	2	0.5	0.940177	0.429556	1	1	A0A0D1BZG9_USTMA
biological_process	GO:0070126	mitochondrial translational termination	1	2	0.5	0.940177	0.429556	1	1	A0A0D1DZK4_USTMA
biological_process	GO:0034965	intronic box C/D RNA processing	1	1	1	1	0.244689	1	1	A0A0D1DXZ8_USTMA
biological_process	GO:0000294	nuclear-transcribed mRNA catabolic process, endonucleolytic cleavage-dependent decay	1	1	1	1	0.244689	1	1	A0A0D1DXZ8_USTMA
biological_process	GO:0090501	RNA phosphodiester bond hydrolysis	1	1	1	0.240077	0.861032	1	1	A0A0D1DXZ8_USTMA
biological_process	GO:0070478	nuclear-transcribed mRNA catabolic process, 3'-5' exonucleolytic nonsense-mediated decay	1	1	1	1	0.244689	1	1	A0A0D1D0I7_USTMA
biological_process	GO:0070156	mitochondrial phenylalanyl-tRNA aminoacylation	1	1	1	1	0.244689	1	1	A0A0D1CDX3_USTMA
cellular_component	GO:0042575	DNA polymerase complex	1	1	1	0.796635	0.409383	1	1	A0A0D1CJS2_USTMA
biological_process	GO:0031647	regulation of protein stability	1	2	0.5	0.615577	0.687039	1	1	A0A0D1E084_USTMA
molecular_function	GO:0008193	tRNA guanylyltransferase activity	1	1	1	1	0.23441	1	1	A0A0D1CG54_USTMA
molecular_function	GO:0004329	formate-tetrahydrofolate ligase activity	1	1	1	1	0.23441	1	1	A0A0D1E2B8_USTMA
molecular_function	GO:0004477	methenyltetrahydrofolate cyclohydrolase activity	1	1	1	1	0.23441	1	1	A0A0D1E2B8_USTMA
cellular_component	GO:0030677	ribonuclease P complex	1	1	1	0.971868	0.139689	1	1	A0A0D1E6M7_USTMA
molecular_function	GO:0033204	ribonuclease P RNA binding	1	1	1	1	0.23441	1	1	A0A0D1E6M7_USTMA
cellular_component	GO:1902716	cell cortex of growing cell tip	1	2	0.5	0.946909	0.407925	1	1	A0A0D1DUA6_USTMA
molecular_function	GO:0005078	MAP-kinase scaffold activity	1	1	1	1	0.23441	1	1	A0A0D1DUA6_USTMA
biological_process	GO:0018142	protein-DNA covalent cross-linking	1	1	1	1	0.244689	1	1	A0A0D1E9U8_USTMA
molecular_function	GO:0032454	histone H3-methyl-lysine-9 demethylase activity	1	1	1	1	0.23441	1	1	A0A0D1BWW9_USTMA
molecular_function	GO:0016742	hydroxymethyl-, formyl- and related transferase activity	1	2	0.5	0.484441	0.846083	1	1	A0A0D1CAM1_USTMA
molecular_function	GO:0008808	cardiolipin synthase activity	1	1	1	1	0.23441	1	1	A0A0D1CUP4_USTMA
molecular_function	GO:0015218	pyrimidine nucleotide transmembrane transporter activity	1	1	1	1	0.23441	1	1	A0A0D1DZ77_USTMA
biological_process	GO:1990519	pyrimidine nucleotide import into mitochondrion	1	1	1	1	0.244689	1	1	A0A0D1DZ77_USTMA
molecular_function	GO:0003964	RNA-directed DNA polymerase activity	1	1	1	1	0.0549036	1	1	A0A0D1DPX6_USTMA
biological_process	GO:0032196	transposition	1	1	1	0.849758	0.569212	1	1	A0A0D1DPX6_USTMA
molecular_function	GO:0004747	ribokinase activity	1	1	1	1	0.23441	1	1	A0A0D1C0N5_USTMA
biological_process	GO:0019303	D-ribose catabolic process	1	1	1	1	0.244689	1	1	A0A0D1C0N5_USTMA
molecular_function	GO:0017125	deoxycytidyl transferase activity	1	1	1	1	0.23441	1	1	A0A0D1E5N9_USTMA
cellular_component	GO:0070692	CTDK-1 complex	1	1	1	1	0.230508	1	1	A0A0D1ECQ1_USTMA
molecular_function	GO:0004865	protein serine/threonine phosphatase inhibitor activity	1	2	0.5	0.945096	0.413916	1	1	A0A0D1CAG9_USTMA
biological_process	GO:0032515	negative regulation of phosphoprotein phosphatase activity	1	1	1	1	0.244689	1	1	A0A0D1CAG9_USTMA
biological_process	GO:0009395	phospholipid catabolic process	1	1	1	0.74727	0.674707	1	1	A0A0D1DQ41_USTMA
biological_process	GO:0071479	cellular response to ionizing radiation	1	1	1	0.985386	0.150242	1	1	A0A0D1C0S5_USTMA
cellular_component	GO:0018444	translation release factor complex	1	2	0.5	0.946909	0.407925	1	1	A0A0D1DVC8_USTMA
biological_process	GO:0002184	cytoplasmic translational termination	1	2	0.5	0.940177	0.429556	1	1	A0A0D1DVC8_USTMA
molecular_function	GO:0043621	protein self-association	1	1	1	1	0.23441	1	1	A0A0D1DU35_USTMA
biological_process	GO:0042542	response to hydrogen peroxide	1	1	1	0.940177	0.429556	1	1	A0A0D1DU35_USTMA
biological_process	GO:0009651	response to salt stress	1	1	1	0.940177	0.429556	1	1	A0A0D1DU35_USTMA
biological_process	GO:0034643	establishment of mitochondrion localization, microtubule-mediated	1	1	1	1	0.244689	1	1	A0A0D1DPL8_USTMA
biological_process	GO:0090149	mitochondrial membrane fission	1	1	1	1	0.244689	1	1	A0A0D1DPL8_USTMA
biological_process	GO:0140572	vacuole fission	1	1	1	1	0.244689	1	1	A0A0D1DPL8_USTMA
molecular_function	GO:0046316	gluconokinase activity	1	1	1	1	0.23441	1	1	A0A0D1DZG2_USTMA
molecular_function	GO:1990825	sequence-specific mRNA binding	1	1	1	1	0.23441	1	1	A0A0D1DVC8_USTMA
molecular_function	GO:0016149	translation release factor activity, codon specific	1	1	1	1	0.23441	1	1	A0A0D1DVC8_USTMA
biological_process	GO:0071630	nuclear protein quality control by the ubiquitin-proteasome system	1	1	1	1	0.244689	1	1	A0A0D1E7Y2_USTMA
biological_process	GO:0031144	proteasome localization	1	1	1	1	0.244689	1	1	A0A0D1E7Y2_USTMA
molecular_function	GO:0090599	alpha-glucosidase activity	1	1	1	0.912366	0.334314	1	1	A0A0D1DU09_USTMA
biological_process	GO:0006474	N-terminal protein amino acid acetylation	1	1	1	0.691822	0.619791	1	1	A0A0D1CWX3_USTMA
molecular_function	GO:0004001	adenosine kinase activity	1	1	1	1	0.23441	1	1	A0A0D1EDZ5_USTMA
molecular_function	GO:0004839	ubiquitin activating enzyme activity	1	1	1	1	0.23441	1	1	A0A0D1CFJ5_USTMA
cellular_component	GO:0070939	Dsl1/NZR complex	1	1	1	1	0.230508	1	1	A0A0D1E3K1_USTMA
biological_process	GO:0060628	regulation of ER to Golgi vesicle-mediated transport	1	1	1	0.849758	0.569212	1	1	A0A0D1E3K1_USTMA
biological_process	GO:1903479	mitotic actomyosin contractile ring assembly actin filament organization	1	1	1	0.940177	0.429556	1	1	A0A0D1CIW0_USTMA
molecular_function	GO:0002953	5'-deoxynucleotidase activity	1	1	1	1	0.23441	1	1	A0A0D1E9H1_USTMA
cellular_component	GO:0005905	clathrin-coated pit	1	1	1	0.971868	0.139689	1	1	A0A0D1E2P1_USTMA
molecular_function	GO:0005545	1-phosphatidylinositol binding	1	1	1	1	0.23441	1	1	A0A0D1E2P1_USTMA
molecular_function	GO:0052917	dolichyl-P-Man:Man(7)GlcNAc(2)-PP-dolichol alpha-1,6-mannosyltransferase	1	1	1	1	0.23441	1	1	A0A0D1CFY9_USTMA
molecular_function	GO:0015379	potassium:chloride symporter activity	1	1	1	1	0.23441	1	1	A0A0D1DUV7_USTMA
biological_process	GO:0006884	cell volume homeostasis	1	1	1	1	0.244689	1	1	A0A0D1DUV7_USTMA
biological_process	GO:0055064	chloride ion homeostasis	1	1	1	1	0.244689	1	1	A0A0D1DUV7_USTMA
biological_process	GO:0055075	potassium ion homeostasis	1	1	1	0.952246	0.25273	1	1	A0A0D1DUV7_USTMA
cellular_component	GO:0071818	BAT3 complex	1	1	1	1	0.230508	1	1	A0A0D1E3H6_USTMA
biological_process	GO:0048208	COPII vesicle coating	1	1	1	0.849758	0.569212	1	1	A0A0D1C766_USTMA
biological_process	GO:0070973	protein localization to endoplasmic reticulum exit site	1	2	0.5	0.940177	0.429556	1	1	A0A0D1C766_USTMA
molecular_function	GO:0140107	high-affinity potassium ion transmembrane transporter activity	1	1	1	1	0.23441	1	1	A0A0D1CKG8_USTMA
cellular_component	GO:1990315	Mcs4 RR-MAPKKK complex	1	1	1	1	0.230508	1	1	A0A0D1CFM5_USTMA
molecular_function	GO:0000156	phosphorelay response regulator activity	1	1	1	1	0.23441	1	1	A0A0D1CFM5_USTMA
molecular_function	GO:0005452	inorganic anion exchanger activity	1	1	1	1	0.23441	1	1	A0A0D1CVX9_USTMA
biological_process	GO:0046713	borate transport	1	1	1	0.940177	0.429556	1	1	A0A0D1CVX9_USTMA
biological_process	GO:0050801	ion homeostasis	1	1	1	0.707565	0.394771	1	1	A0A0D1CVX9_USTMA
biological_process	GO:0097036	regulation of plasma membrane sterol distribution	1	1	1	1	0.244689	1	1	A0A0D1CXV0_USTMA
molecular_function	GO:0036121	double-stranded DNA helicase activity	1	1	1	1	0.23441	1	1	A0A0D1CH81_USTMA
biological_process	GO:0000743	nuclear migration involved in conjugation with cellular fusion	1	1	1	1	0.244689	1	1	A0A0D1DVE7_USTMA
biological_process	GO:0018023	peptidyl-lysine trimethylation	1	1	1	0.985386	0.150242	1	1	A0A0D1E157_USTMA
biological_process	GO:0006080	substituted mannan metabolic process	1	1	1	1	0.244689	1	1	A0A0D1E358_USTMA
molecular_function	GO:0004594	pantothenate kinase activity	1	1	1	1	0.23441	1	1	A0A0D1DPC6_USTMA
biological_process	GO:0035020	regulation of Rac protein signal transduction	1	1	1	1	0.244689	1	1	A0A0D1E6N8_USTMA
molecular_function	GO:0004521	endoribonuclease activity	0	10	0	0.128613	0.954183	1	1
biological_process	GO:0006398	mRNA 3'-end processing by stem-loop binding and cleavage	0	2	0	0.570444	1	1	1
molecular_function	GO:0008160	protein tyrosine phosphatase activator activity	0	2	0	0.586084	1	1	1
cellular_component	GO:0000794	condensed nuclear chromosome	0	3	0	0.98694	0.0571809	1	1
molecular_function	GO:1905334	Swi5-Sfr1 complex binding	0	1	0	0.76559	1	1	1
biological_process	GO:0070192	chromosome organization involved in meiotic cell cycle	0	2	0	0.844312	0.384423	1	1
biological_process	GO:1990918	double-strand break repair involved in meiotic recombination	0	1	0	0.755311	1	1	1
biological_process	GO:0007533	mating type switching	0	1	0	0.570444	1	1	1
biological_process	GO:0000708	meiotic strand invasion	0	1	0	0.755311	1	1	1
biological_process	GO:1990426	mitotic recombination-dependent replication fork processing	0	1	0	0.755311	1	1	1
biological_process	GO:0120290	stalled replication fork localization to nuclear periphery	0	1	0	0.755311	1	1	1
biological_process	GO:0016458	obsolete gene silencing	0	1	0	0.10842	0.980488	1	1
cellular_component	GO:0031261	DNA replication preinitiation complex	0	3	0	0.0943408	1	1	1
biological_process	GO:1902977	mitotic DNA replication preinitiation complex assembly	0	2	0	0.570444	1	1	1
biological_process	GO:0031938	obsolete regulation of chromatin silencing at telomere	0	1	0	0.430788	1	1	1
cellular_component	GO:0071819	DUBm complex	0	2	0	0.592075	1	1	1
biological_process	GO:0016578	histone deubiquitination	0	3	0	0.430788	1	1	1
cellular_component	GO:0032044	DSIF complex	0	2	0	0.592075	1	1	1
molecular_function	GO:0008853	exodeoxyribonuclease III activity	0	1	0	0.76559	1	1	1
molecular_function	GO:0016018	cyclosporin A binding	0	4	0	0.343391	1	1	1
molecular_function	GO:0030620	U2 snRNA binding	0	2	0	0.586084	1	1	1
molecular_function	GO:0004751	ribose-5-phosphate isomerase activity	0	1	0	0.76559	1	1	1
biological_process	GO:0006014	D-ribose metabolic process	0	1	0	0.940177	0.429556	1	1
biological_process	GO:0009052	pentose-phosphate shunt, non-oxidative branch	0	4	0	0.325293	1	1	1
biological_process	GO:0008615	pyridoxine biosynthetic process	0	3	0	0.430788	1	1	1
cellular_component	GO:0005749	mitochondrial respiratory chain complex II, succinate dehydrogenase complex (ubiquinone)	0	4	0	0.350451	1	1	1
molecular_function	GO:0051538	3 iron, 4 sulfur cluster binding	0	2	0	0.586084	1	1	1
molecular_function	GO:0009055	electron transfer activity	0	12	0	0.000389771	0.999949	0.038	1
molecular_function	GO:0008177	succinate dehydrogenase (ubiquinone) activity	0	2	0	0.586084	1	1	1
biological_process	GO:0022904	respiratory electron transport chain	0	9	0	0.000135661	0.999991	0.022	1
cellular_component	GO:0035101	FACT complex	0	2	0	0.592075	1	1	1
biological_process	GO:0034724	DNA replication-independent chromatin organization	0	1	0	0.185432	1	1	1
molecular_function	GO:0004019	adenylosuccinate synthase activity	0	1	0	0.76559	1	1	1
biological_process	GO:0044208	'de novo' AMP biosynthetic process	0	2	0	0.570444	1	1	1
biological_process	GO:0046040	IMP metabolic process	0	1	0	0.0342771	1	0.999	1
biological_process	GO:0097250	mitochondrial respirasome assembly	0	1	0	0.755311	1	1	1
cellular_component	GO:0033503	HULC complex	0	2	0	0.592075	1	1	1
cellular_component	GO:0097505	Rad6-Rad18 complex	0	2	0	0.592075	1	1	1
cellular_component	GO:1990303	UBR1-RAD6 ubiquitin ligase complex	0	1	0	0.769492	1	1	1
biological_process	GO:0071455	cellular response to hyperoxia	0	1	0	0.755311	1	1	1
biological_process	GO:0006348	subtelomeric heterochromatin assembly	0	8	0	NA	NA	NA	NA
biological_process	GO:0071629	cytoplasm protein quality control by the ubiquitin-proteasome system	0	2	0	0.570444	1	1	1
biological_process	GO:0006353	DNA-templated transcription, termination	0	2	0	0.13525	0.974137	1	1
biological_process	GO:0042275	error-free postreplication DNA repair	0	1	0	0.755311	1	1	1
biological_process	GO:0071894	histone H2B conserved C-terminal lysine ubiquitination	0	1	0	0.570444	1	1	1
biological_process	GO:0016574	histone ubiquitination	0	4	0	0.458112	0.860014	1	1
biological_process	GO:0031571	mitotic G1 DNA damage checkpoint signaling	0	2	0	0.570444	1	1	1
biological_process	GO:2000639	negative regulation of SREBP signaling pathway	0	1	0	0.755311	1	1	1
biological_process	GO:0090089	regulation of dipeptide transport	0	1	0	0.755311	1	1	1
biological_process	GO:0120174	stress-induced homeostatically regulated protein degradation pathway	0	1	0	0.755311	1	1	1
biological_process	GO:0000722	telomere maintenance via recombination	0	4	0	0.325293	1	1	1
molecular_function	GO:0031386	protein tag	0	8	0	0.117775	1	1	1
biological_process	GO:0034227	tRNA thio-modification	0	2	0	0.546509	0.814568	1	1
biological_process	GO:0044205	'de novo' UMP biosynthetic process	0	5	0	0.245612	1	1	1
biological_process	GO:0006221	pyrimidine nucleotide biosynthetic process	0	1	0	0.423988	0.789901	1	1
molecular_function	GO:0030371	translation repressor activity	0	1	0	0.76559	1	1	1
biological_process	GO:0043488	regulation of mRNA stability	0	2	0	0.968534	0.0691896	1	1
cellular_component	GO:0016363	nuclear matrix	0	2	0	0.592075	1	1	1
biological_process	GO:0071528	tRNA re-export from nucleus	0	1	0	0.755311	1	1	1
molecular_function	GO:0042800	histone methyltransferase activity (H3-K4 specific)	0	1	0	0.76559	1	1	1
cellular_component	GO:0035327	euchromatin	0	3	0	NA	NA	NA	NA
biological_process	GO:0070827	obsolete chromatin maintenance	0	1	0	0.755311	1	1	1
biological_process	GO:0042789	mRNA transcription by RNA polymerase II	0	1	0	0.755311	1	1	1
biological_process	GO:0034728	nucleosome organization	0	1	0	0.0922864	0.965102	1	1
molecular_function	GO:0000334	3-hydroxyanthranilate 3,4-dioxygenase activity	0	1	0	0.76559	1	1	1
biological_process	GO:0046874	quinolinate metabolic process	0	1	0	0.74727	0.674707	1	1
cellular_component	GO:0005751	mitochondrial respiratory chain complex IV	0	12	0	0.0428905	1	0.983	1
molecular_function	GO:0004129	cytochrome-c oxidase activity	0	12	0	0.040345	1	0.995	1
biological_process	GO:0015990	electron transport coupled proton transport	0	9	0	0.0797564	1	1	1
biological_process	GO:0006123	mitochondrial electron transport, cytochrome c to oxygen	0	14	0	0.0195122	1	0.987	1
cellular_component	GO:0034707	chloride channel complex	0	1	0	0.769492	1	1	1
molecular_function	GO:0015299	solute:proton antiporter activity	0	6	0	0.189106	0.959655	1	1
molecular_function	GO:0005247	voltage-gated chloride channel activity	0	2	0	0.586084	1	1	1
biological_process	GO:0006821	chloride transport	0	2	0	0.74727	0.674707	1	1
biological_process	GO:0006811	ion transport	0	1	0	0.0444255	0.973186	1	1
molecular_function	GO:0050185	phosphatidylinositol deacylase activity	0	1	0	0.76559	1	1	1
biological_process	GO:0006505	GPI anchor metabolic process	0	1	0	0.631148	0.554377	1	1
cellular_component	GO:0005773	vacuole	0	8	0	0.259847	0.810751	1	1
biological_process	GO:0015809	L-arginine transmembrane transport	0	1	0	NA	NA	NA	NA
biological_process	GO:0051453	regulation of intracellular pH	0	4	0	0.255823	0.939806	1	1
molecular_function	GO:0097602	cullin family protein binding	0	4	0	0.343391	1	1	1
molecular_function	GO:0032182	ubiquitin-like protein binding	0	1	0	0.913221	0.180166	1	1
biological_process	GO:0051443	positive regulation of ubiquitin-protein transferase activity	0	1	0	0.755311	1	1	1
biological_process	GO:0045116	protein neddylation	0	5	0	0.245612	1	1	1
cellular_component	GO:0030121	AP-1 adaptor complex	0	3	0	0.455531	1	1	1
biological_process	GO:0099638	endosome to plasma membrane protein transport	0	2	0	0.570444	1	1	1
molecular_function	GO:0015078	proton transmembrane transporter activity	0	6	0	1.45622e-05	0.999998	0.001	1
cellular_component	GO:0045263	proton-transporting ATP synthase complex, coupling factor F(o)	0	2	0	0.197606	0.957109	1	1
molecular_function	GO:0015453	oxidoreduction-driven active transmembrane transporter activity	0	1	0	0.76559	1	1	1
cellular_component	GO:0070469	respirasome	0	24	0	2.36495e-05	0.999999	0.002	1
biological_process	GO:0042773	ATP synthesis coupled electron transport	0	6	0	0.000383638	0.999971	0.066	1
biological_process	GO:0000464	endonucleolytic cleavage in ITS1 upstream of 5.8S rRNA from tricistronic rRNA transcript (SSU-rRNA, 5.8S rRNA, LSU-rRNA)	0	1	0	0.755311	1	1	1
cellular_component	GO:0043529	GET complex	0	2	0	0.592075	1	1	1
biological_process	GO:0006620	posttranslational protein targeting to endoplasmic reticulum membrane	0	4	0	0.255823	0.939806	1	1
molecular_function	GO:0000254	C-4 methylsterol oxidase activity	0	7	0	0.153917	1	1	1
molecular_function	GO:0004042	acetyl-CoA:L-glutamate N-acetyltransferase activity	0	3	0	0.448633	1	1	1
molecular_function	GO:0004358	glutamate N-acetyltransferase activity	0	1	0	0.76559	1	1	1
molecular_function	GO:0103045	methione N-acyltransferase activity	0	1	0	0.76559	1	1	1
biological_process	GO:0006592	ornithine biosynthetic process	0	1	0	0.755311	1	1	1
molecular_function	GO:0003855	3-dehydroquinate dehydratase activity	0	2	0	0.586084	1	1	1
molecular_function	GO:0003856	3-dehydroquinate synthase activity	0	2	0	0.586084	1	1	1
molecular_function	GO:0003866	3-phosphoshikimate 1-carboxyvinyltransferase activity	0	1	0	0.76559	1	1	1
molecular_function	GO:0004764	shikimate 3-dehydrogenase (NADP+) activity	0	2	0	0.586084	1	1	1
molecular_function	GO:0004765	shikimate kinase activity	0	1	0	0.76559	1	1	1
biological_process	GO:0009423	chorismate biosynthetic process	0	3	0	0.430788	1	1	1
molecular_function	GO:0008824	cyanate hydratase activity	0	1	0	0.76559	1	1	1
biological_process	GO:0009439	cyanate metabolic process	0	1	0	0.755311	1	1	1
biological_process	GO:0000447	endonucleolytic cleavage in ITS1 to separate SSU-rRNA from 5.8S rRNA and LSU-rRNA from tricistronic rRNA transcript (SSU-rRNA, 5.8S rRNA, LSU-rRNA)	0	9	0	0.0797564	1	1	1
biological_process	GO:0034247	snoRNA splicing	0	1	0	0.755311	1	1	1
cellular_component	GO:0070274	RES complex	0	1	0	0.769492	1	1	1
molecular_function	GO:0031151	histone methyltransferase activity (H3-K79 specific)	0	1	0	0.76559	1	1	1
biological_process	GO:2000677	regulation of transcription regulatory region DNA binding	0	1	0	0.570444	1	1	1
biological_process	GO:0043967	histone H4 acetylation	0	5	0	0.185432	1	1	1
biological_process	GO:0071033	nuclear mRNA surveillance	0	2	0	NA	NA	NA	NA
molecular_function	GO:0070122	isopeptidase activity	0	6	0	0.201134	1	1	1
molecular_function	GO:0019784	NEDD8-specific protease activity	0	3	0	0.448633	1	1	1
cellular_component	GO:0045275	respiratory chain complex III	0	1	0	0.122673	1	1	1
molecular_function	GO:0008121	ubiquinol-cytochrome-c reductase activity	0	4	0	0.343391	1	1	1
cellular_component	GO:0005779	integral component of peroxisomal membrane	0	7	0	0.159502	1	1	1
biological_process	GO:0043653	mitochondrial fragmentation involved in apoptotic process	0	1	0	0.755311	1	1	1
molecular_function	GO:0000774	adenyl-nucleotide exchange factor activity	0	3	0	0.448633	1	1	1
molecular_function	GO:0090560	2-(3-amino-3-carboxypropyl)histidine synthase activity	0	1	0	0.76559	1	1	1
molecular_function	GO:0016705	oxidoreductase activity, acting on paired donors, with incorporation or reduction of molecular oxygen	0	20	0	0.185116	0.891095	1	1
molecular_function	GO:0004402	histone acetyltransferase activity	0	5	0	0.153917	1	1	1
cellular_component	GO:0000786	nucleosome	0	8	0	0.122673	1	1	1
molecular_function	GO:0051908	double-stranded DNA 5'-3' exodeoxyribonuclease activity	0	1	0	0.76559	1	1	1
biological_process	GO:0070914	UV-damage excision repair	0	6	0	0.458112	0.860014	1	1
molecular_function	GO:0045131	pre-mRNA branch point binding	0	1	0	0.76559	1	1	1
biological_process	GO:0048024	regulation of mRNA splicing, via spliceosome	0	2	0	0.245612	1	1	1
molecular_function	GO:0106073	dolichyl pyrophosphate Glc2Man9GlcNAc2 alpha-1,2-glucosyltransferase activity	0	1	0	0.76559	1	1	1
biological_process	GO:0048312	intracellular distribution of mitochondria	0	1	0	0.755311	1	1	1
molecular_function	GO:0004518	nuclease activity	0	4	0	0.199123	0.866432	1	1
molecular_function	GO:0110152	RNA NAD-cap (NAD-forming) hydrolase activity	0	1	0	0.76559	1	1	1
molecular_function	GO:0034353	RNA pyrophosphohydrolase activity	0	1	0	0.76559	1	1	1
biological_process	GO:0110155	NAD-cap decapping	0	1	0	0.755311	1	1	1
biological_process	GO:0051014	actin filament severing	0	1	0	0.430788	1	1	1
molecular_function	GO:0003746	translation elongation factor activity	0	12	0	0.040345	1	0.995	1
biological_process	GO:0070125	mitochondrial translational elongation	0	4	0	0.325293	1	1	1
biological_process	GO:0006414	translational elongation	0	9	0	0.00801756	0.999126	0.804	1
biological_process	GO:0000454	snoRNA guided rRNA pseudouridine synthesis	0	1	0	0.755311	1	1	1
molecular_function	GO:0004582	dolichyl-phosphate beta-D-mannosyltransferase activity	0	1	0	0.76559	1	1	1
biological_process	GO:0019348	dolichol metabolic process	0	2	0	0.325293	1	1	1
biological_process	GO:0035269	protein O-linked mannosylation	0	9	0	0.0797564	1	1	1
cellular_component	GO:0071540	eukaryotic translation initiation factor 3 complex, eIF3e	0	5	0	0.269591	1	1	1
cellular_component	GO:0071541	eukaryotic translation initiation factor 3 complex, eIF3m	0	5	0	0.269591	1	1	1
cellular_component	GO:0043614	multi-eIF complex	0	6	0	0.207373	1	1	1
biological_process	GO:0002188	translation reinitiation	0	5	0	0.245612	1	1	1
molecular_function	GO:0004310	farnesyl-diphosphate farnesyltransferase activity	0	1	0	0.76559	1	1	1
molecular_function	GO:0051996	squalene synthase activity	0	1	0	0.76559	1	1	1
biological_process	GO:0045338	farnesyl diphosphate metabolic process	0	1	0	0.644019	0.754388	1	1
cellular_component	GO:0000417	HIR complex	0	1	0	0.769492	1	1	1
biological_process	GO:0006336	DNA replication-independent chromatin assembly	0	2	0	0.245612	1	1	1
molecular_function	GO:0008398	sterol 14-demethylase activity	0	1	0	0.76559	1	1	1
cellular_component	GO:0005776	autophagosome	0	2	0	0.865164	0.544469	1	1
molecular_function	GO:0008429	phosphatidylethanolamine binding	0	1	0	0.76559	1	1	1
biological_process	GO:0006995	cellular response to nitrogen starvation	0	6	0	0.139986	1	1	1
biological_process	GO:0034982	mitochondrial protein processing	0	2	0	0.139986	1	1	1
biological_process	GO:0033615	mitochondrial proton-transporting ATP synthase complex assembly	0	4	0	0.325293	1	1	1
biological_process	GO:0046279	3,4-dihydroxybenzoate biosynthetic process	0	1	0	0.755311	1	1	1
biological_process	GO:0019630	quinate metabolic process	0	1	0	0.755311	1	1	1
molecular_function	GO:0004130	cytochrome-c peroxidase activity	0	1	0	0.76559	1	1	1
molecular_function	GO:0004601	peroxidase activity	0	8	0	0.0138038	1	0.826	1
biological_process	GO:0042744	hydrogen peroxide catabolic process	0	5	0	0.245612	1	1	1
biological_process	GO:0000302	response to reactive oxygen species	0	2	0	0.644019	0.754388	1	1
cellular_component	GO:0032585	multivesicular body membrane	0	2	0	0.592075	1	1	1
biological_process	GO:0034496	multivesicular body membrane disassembly	0	1	0	0.755311	1	1	1
biological_process	GO:0046461	neutral lipid catabolic process	0	1	0	0.245612	1	1	1
biological_process	GO:0006335	DNA replication-dependent chromatin assembly	0	2	0	0.570444	1	1	1
molecular_function	GO:0005458	GDP-mannose transmembrane transporter activity	0	1	0	0.76559	1	1	1
cellular_component	GO:0042788	polysomal ribosome	0	4	0	0.350451	1	1	1
cellular_component	GO:0097078	FAL1-SGD1 complex	0	1	0	0.769492	1	1	1
molecular_function	GO:0070840	dynein complex binding	0	2	0	0.586084	1	1	1
biological_process	GO:0031023	microtubule organizing center organization	0	1	0	0.245612	1	1	1
biological_process	GO:0051012	microtubule sliding	0	1	0	0.755311	1	1	1
biological_process	GO:0007097	nuclear migration	0	2	0	0.767502	0.541888	1	1
biological_process	GO:2000574	obsolete regulation of microtubule motor activity	0	2	0	0.430788	1	1	1
biological_process	GO:0047496	vesicle transport along microtubule	0	2	0	0.430788	1	1	1
cellular_component	GO:0019008	molybdopterin synthase complex	0	3	0	0.455531	1	1	1
molecular_function	GO:0030366	molybdopterin synthase activity	0	2	0	0.586084	1	1	1
biological_process	GO:0006777	Mo-molybdopterin cofactor biosynthetic process	0	5	0	0.245612	1	1	1
molecular_function	GO:0000175	3'-5'-exoribonuclease activity	0	10	0	0.189106	0.959655	1	1
cellular_component	GO:0000123	histone acetyltransferase complex	0	1	0	0.653321	0.516577	1	1
cellular_component	GO:0032221	Rpd3S/Clr6-CII complex	0	4	0	0.350451	1	1	1
biological_process	GO:0071963	establishment or maintenance of cell polarity regulating cell shape	0	6	0	0.380209	0.894332	1	1
biological_process	GO:0043968	histone H2A acetylation	0	3	0	0.430788	1	1	1
cellular_component	GO:0097042	extrinsic component of fungal-type vacuolar membrane	0	3	0	0.455531	1	1	1
cellular_component	GO:1990130	GATOR1 complex	0	3	0	0.455531	1	1	1
biological_process	GO:0034198	cellular response to amino acid starvation	0	3	0	0.245612	1	1	1
biological_process	GO:0010506	regulation of autophagy	0	4	0	0.0797564	1	1	1
molecular_function	GO:0004128	cytochrome-b5 reductase activity, acting on NAD(P)H	0	4	0	0.343391	1	1	1
biological_process	GO:0002183	cytoplasmic translational initiation	0	6	0	0.105841	0.964015	1	1
biological_process	GO:0046034	ATP metabolic process	0	2	0	8.84961e-06	0.999999	0.001	1
[truncated: 2,361 more rows]
[truncated: 200 more columns]

## Sheet: polyQ
GO domain	GO ID	GO term	polyQ protein	total number	number / total	raw p-value under-representation	raw p-value over-representation	FWER under-representation	FWER over-representation	Gene Name
cellular_component	GO:0005634	nucleus	114	702	0.162393	0.999999	1.69353e-06	1	0	SSN3_USTMA	SET2_USTMA	BBP_USTMA	EAF11_USTMA	DUS3_USTMA	EIF3E_USTMA	STUA_USTMA	STU1_USTMA	PACC_USTMA	A0A0D1DQ67_USTMA	A0A0D1CDH0_USTMA	A0A0D1DP88_USTMA	A0A0D1DTJ9_USTMA	A0A0D1DPJ8_USTMA	A0A0D1CRI1_USTMA	A0A0D1CTU4_USTMA	A0A0D1DQC1_USTMA	A0A0D1DYT4_USTMA	A0A0D1E120_USTMA	A0A0D1DYS4_USTMA	A0A0D1CI43_USTMA	A0A0D1C217_USTMA	A0A0D1DY39_USTMA	A0A0D1CHB9_USTMA	A0A0D1C3F5_USTMA	A0A0D1DU59_USTMA	A0A0D1C7J8_USTMA	A0A0D1E5Q5_USTMA	A0A0D1C4S0_USTMA	A0A0D1D1R0_USTMA	A0A0D1E3P7_USTMA	A0A0D1CMN6_USTMA	A0A0D1E1E8_USTMA	A0A0D1E6F1_USTMA	A0A0D1CRS2_USTMA	A0A0D1E669_USTMA	A0A0D1DSH3_USTMA	A0A0D1CFL6_USTMA	A0A0D1CXD6_USTMA	A0A0D1DYV1_USTMA
cellular_component	GO:0016021	integral component of membrane	86	1088	0.0790441	8.60035e-05	0.999947	0.001	1	YOP1_USTMA	CHS7_USTMA	CHS8_USTMA	CHS5_USTMA	ATG9_USTMA	CHS1_USTMA	TIM50_USTMA	A0A0D1CS33_USTMA	A0A0D1E249_USTMA	A0A0D1CH73_USTMA	A0A0D1C917_USTMA	A0A0D1E472_USTMA	A0A0D1C461_USTMA	A0A0D1DUZ7_USTMA	A0A0D1DTG7_USTMA	A0A0D1DZE8_USTMA	A0A0D1CMV5_USTMA	A0A0D1DWW5_USTMA	A0A0D1DXI2_USTMA	A0A0D1CF49_USTMA	A0A0D1BX26_USTMA	A0A0D1E8Z5_USTMA	A0A0D1C321_USTMA	A0A0D1CQF3_USTMA	A0A0D1DYV8_USTMA	A0A0D1CGQ7_USTMA	A0A0D1DPY9_USTMA	A0A0D1C1B9_USTMA	A0A0D1CGW6_USTMA	A0A0D1DXA8_USTMA	A0A0D1E113_USTMA	A0A0D1BYV2_USTMA	A0A0D1EBR9_USTMA	A0A0D1CJ01_USTMA	A0A0D1DQG5_USTMA	A0A0D1E188_USTMA	A0A0D1DT09_USTMA	A0A0D1C0M4_USTMA	A0A0D1DS20_USTMA	A0A0D1DV13_USTMA
cellular_component	GO:0005737	cytoplasm	78	678	0.115044	0.0236072	0.981594	0.62	1	CWC26_USTMA	DUS3_USTMA	CYAA_USTMA	NST1_USTMA	PACC_USTMA	A0A0D1C4X1_USTMA	A0A0D1E1D6_USTMA	A0A0D1CG70_USTMA	A0A0D1C2L7_USTMA	A0A0D1CRI1_USTMA	A0A0D1CTU4_USTMA	A0A0D1DYT4_USTMA	A0A0D1DYS4_USTMA	A0A0D1DX71_USTMA	A0A0D1C217_USTMA	A0A0D1CV21_USTMA	A0A0D1DSD8_USTMA	A0A0D1DPZ6_USTMA	A0A0D1EBV9_USTMA	A0A0D1C4S0_USTMA	A0A0D1DUR7_USTMA	A0A0D1CUN2_USTMA	A0A0D1DPG6_USTMA	A0A0D1DQV3_USTMA	A0A0D1CM18_USTMA	A0A0D1E669_USTMA	A0A0D1BZI3_USTMA	A0A0D1CSR0_USTMA	A0A0D1C1B9_USTMA	A0A0D1EB32_USTMA	A0A0D1CRA9_USTMA	A0A0D1BUB7_USTMA	A0A0D1DSL6_USTMA	A0A0D1E0Z1_USTMA	A0A0D1E159_USTMA	A0A0D1CQE5_USTMA	A0A0D1DXB8_USTMA	A0A0D1EBL3_USTMA	A0A0D1CI23_USTMA	A0A0D1CRW1_USTMA
molecular_function	GO:0005524	ATP binding	63	501	0.125749	0.977983	0.0311693	1	1	SWR1_USTMA	SSN3_USTMA	YUM14_USTMA	SPB4_USTMA	CHS8_USTMA	CYAA_USTMA	A0A0D1C917_USTMA	A0A0D1DT51_USTMA	A0A0D1DPJ8_USTMA	A0A0D1DXP0_USTMA	A0A0D1DYS4_USTMA	A0A0D1C217_USTMA	A0A0D1DSD8_USTMA	A0A0D1DY39_USTMA	A0A0D1CF39_USTMA	A0A0D1CLZ9_USTMA	A0A0D1C4S0_USTMA	A0A0D1CP62_USTMA	A0A0D1DUI3_USTMA	A0A0D1E2I8_USTMA	A0A0D1DZ04_USTMA	A0A0D1DPG6_USTMA	A0A0D1CXP7_USTMA	A0A0D1E8R8_USTMA	A0A0D1E0I0_USTMA	A0A0D1DMX3_USTMA	A0A0D1EB32_USTMA	A0A0D1CRA9_USTMA	A0A0D1BUB7_USTMA	A0A0D1EBR9_USTMA	A0A0D1DWW8_USTMA	A0A0D1DSL6_USTMA	A0A0D1E0Z1_USTMA	A0A0D1C157_USTMA	A0A0D1CGQ9_USTMA	A0A0D1DSI0_USTMA	A0A0D1DRE2_USTMA	A0A0D1BZG3_USTMA	A0A0D1CPW3_USTMA	A0A0D1E312_USTMA
molecular_function	GO:0008270	zinc ion binding	57	234	0.24359	1	6.10959e-11	1	0	BBP_USTMA	SEC24_USTMA	A0A0D1DYX7_USTMA	A0A0D1DT51_USTMA	A0A0D1DSA8_USTMA	A0A0D1E6M8_USTMA	A0A0D1CI43_USTMA	A0A0D1CWU6_USTMA	A0A0D1E461_USTMA	A0A0D1DWU7_USTMA	A0A0D1E3P7_USTMA	A0A0D1C3G4_USTMA	A0A0D1E6D6_USTMA	A0A0D1E537_USTMA	A0A0D1E6F1_USTMA	A0A0D1DSH3_USTMA	A0A0D1DTV6_USTMA	A0A0D1C0E5_USTMA	A0A0D1CXD6_USTMA	A0A0D1EB86_USTMA	A0A0D1CN71_USTMA	A0A0D1EB74_USTMA	A0A0D1CPM4_USTMA	A0A0D1DTF5_USTMA	A0A0D1CML3_USTMA	A0A0D1CFV9_USTMA	A0A0D1CI28_USTMA	A0A0D1E2K0_USTMA	A0A0D1EA12_USTMA	A0A0D1E179_USTMA	A0A0D1E8G2_USTMA	A0A0D1CH16_USTMA	A0A0D1E0F6_USTMA	A0A0D1DYX4_USTMA	A0A0D1C3J0_USTMA	A0A0D1C790_USTMA	A0A0D1E9C1_USTMA	A0A0D1DU04_USTMA	A0A0D1E914_USTMA	A0A0D1CHF9_USTMA
molecular_function	GO:0000981	DNA-binding transcription factor activity, RNA polymerase II-specific	52	149	0.348993	1	9.05691e-20	1	0	A0A0D1DYX7_USTMA	A0A0D1CDH0_USTMA	A0A0D1DSA8_USTMA	A0A0D1CSA7_USTMA	A0A0D1CWU6_USTMA	A0A0D1E461_USTMA	A0A0D1DWU7_USTMA	A0A0D1E3P7_USTMA	A0A0D1C3G4_USTMA	A0A0D1DYA8_USTMA	A0A0D1E6D6_USTMA	A0A0D1E537_USTMA	A0A0D1E6F1_USTMA	A0A0D1DTV6_USTMA	A0A0D1C0E5_USTMA	A0A0D1CXD6_USTMA	A0A0D1DQX3_USTMA	A0A0D1CS44_USTMA	A0A0D1EB86_USTMA	A0A0D1EB74_USTMA	A0A0D1CPM4_USTMA	A0A0D1DTF5_USTMA	A0A0D1CA32_USTMA	A0A0D1E2K0_USTMA	A0A0D1BUZ6_USTMA	A0A0D1EA12_USTMA	A0A0D1BW04_USTMA	A0A0D1E179_USTMA	A0A0D1E8G2_USTMA	A0A0D1DW26_USTMA	A0A0D1E0F6_USTMA	A0A0D1DYX4_USTMA	A0A0D1C3J0_USTMA	A0A0D1E9C1_USTMA	A0A0D1DU04_USTMA	A0A0D1E914_USTMA	A0A0D1CHF9_USTMA	A0A0D1CGN3_USTMA	A0A0D1C7N9_USTMA	A0A0D1E0N8_USTMA
molecular_function	GO:0046872	metal ion binding	30	312	0.0961538	0.999946	9.05443e-05	1	0.019	SSN3_USTMA	VPS27_USTMA	DUS3_USTMA	CYAA_USTMA	PACC_USTMA	A0A0D1DQ00_USTMA	A0A0D1E6L2_USTMA	A0A0D1C3I0_USTMA	A0A0D1DU59_USTMA	A0A0D1EAA3_USTMA	A0A0D1E264_USTMA	A0A0D1DUI3_USTMA	A0A0D1CNC6_USTMA	A0A0D1EAJ6_USTMA	A0A0D1CJ01_USTMA	A0A0D1CR50_USTMA	A0A0D1CR28_USTMA	A0A0D1E225_USTMA	A0A0D1DYH5_USTMA	A0A0D1EAA7_USTMA	A0A0D1CPX3_USTMA	A0A0D1BWE6_USTMA	A0A0D1DZE7_USTMA	A0A0D1DT76_USTMA	A0A0D1BUD7_USTMA	A0A0D1E288_USTMA	A0A0D1CDB8_USTMA	A0A0D1DYN0_USTMA	A0A0D1DX26_USTMA	A0A0D1CWR4_USTMA
biological_process	GO:0006357	regulation of transcription by RNA polymerase II	29	100	0.29	1	5.33638e-09	1	0	MED7_USTMA	A0A0D1CDH0_USTMA	A0A0D1DP88_USTMA	A0A0D1CI43_USTMA	A0A0D1CSA7_USTMA	A0A0D1DUT0_USTMA	A0A0D1E5B1_USTMA	A0A0D1E5Q5_USTMA	A0A0D1DYA8_USTMA	A0A0D1DQY1_USTMA	A0A0D1DSH3_USTMA	A0A0D1CNC6_USTMA	A0A0D1DQX3_USTMA	A0A0D1CS44_USTMA	A0A0D1D1U5_USTMA	A0A0D1CA32_USTMA	A0A0D1CGS0_USTMA	A0A0D1DXZ0_USTMA	A0A0D1BUZ6_USTMA	A0A0D1E6T9_USTMA	A0A0D1BW04_USTMA	A0A0D1CL12_USTMA	A0A0D1CMK5_USTMA	A0A0D1DQR1_USTMA	A0A0D1E351_USTMA	A0A0D1DVL4_USTMA	A0A0D1DYD0_USTMA	A0A0D1E5N8_USTMA	A0A0D1DV43_USTMA
cellular_component	GO:0005829	cytosol	27	331	0.081571	0.00188228	0.998994	0.078	1	VTS1_USTMA	AP1G1_USTMA	GABAT_USTMA	CTU1_USTMA	A0A0D1E474_USTMA	A0A0D1C4S0_USTMA	A0A0D1CP62_USTMA	A0A0D1DZ04_USTMA	A0A0D1CH86_USTMA	A0A0D1BW76_USTMA	A0A0D1CKK3_USTMA	A0A0D1DZ67_USTMA	A0A0D1E6M2_USTMA	A0A0D1CGW4_USTMA	A0A0D1C7P5_USTMA	A0A0D1E695_USTMA	A0A0D1DYZ9_USTMA	A0A0D1E0C2_USTMA	A0A0D1E4A1_USTMA	A0A0D1DZE7_USTMA	A0A0D1CWZ4_USTMA	A0A0D1EBZ2_USTMA	A0A0D1BUU2_USTMA	A0A0D1DSQ2_USTMA	A0A0D1CDB8_USTMA	A0A0D1C9Y1_USTMA	A0A0D1C6B6_USTMA
molecular_function	GO:0003677	DNA binding	24	145	0.165517	1	1.36235e-10	1	0	SWR1_USTMA	MG101_USTMA	PACC_USTMA	A0A0D1DYX7_USTMA	A0A0D1C3I0_USTMA	A0A0D1E461_USTMA	A0A0D1C8N6_USTMA	A0A0D1DWU7_USTMA	A0A0D1CRA1_USTMA	A0A0D1CPN1_USTMA	A0A0D1DTV6_USTMA	A0A0D1C0E5_USTMA	A0A0D1DYV1_USTMA	A0A0D1DMS6_USTMA	A0A0D1EB74_USTMA	A0A0D1DTF5_USTMA	A0A0D1E179_USTMA	A0A0D1DYX4_USTMA	A0A0D1C790_USTMA	A0A0D1CHF9_USTMA	A0A0D1CGN3_USTMA	A0A0D1E3K0_USTMA	A0A0D1CIE9_USTMA	A0A0D1BVT7_USTMA
molecular_function	GO:0003723	RNA binding	20	220	0.0909091	0.396226	0.668236	1	1	YUM14_USTMA	SPB4_USTMA	A0A0D1DT51_USTMA	A0A0D1DQ00_USTMA	A0A0D1CLK3_USTMA	A0A0D1E4H5_USTMA	A0A0D1DW69_USTMA	A0A0D1EAA3_USTMA	A0A0D1CQU2_USTMA	A0A0D1C7J8_USTMA	A0A0D1C165_USTMA	A0A0D1CMN6_USTMA	A0A0D1DQJ5_USTMA	A0A0D1DTQ7_USTMA	A0A0D1CDE0_USTMA	A0A0D1E225_USTMA	A0A0D1E5T9_USTMA	A0A0D1CPZ3_USTMA	A0A0D1E3U8_USTMA	A0A0D1E733_USTMA
molecular_function	GO:0004674	protein serine/threonine kinase activity	20	65	0.307692	0.999997	9.26202e-06	1	0.002	A0A0D1DPJ8_USTMA	A0A0D1DYS4_USTMA	A0A0D1C217_USTMA	A0A0D1DY39_USTMA	A0A0D1DPG6_USTMA	A0A0D1CXP7_USTMA	A0A0D1E0I0_USTMA	A0A0D1CRA9_USTMA	A0A0D1BUB7_USTMA	A0A0D1DSL6_USTMA	A0A0D1DRE2_USTMA	A0A0D1EA76_USTMA	A0A0D1BVS5_USTMA	A0A0D1CAA1_USTMA	A0A0D1CAE8_USTMA	A0A0D1BZG9_USTMA	A0A0D1E136_USTMA	A0A0D1E0L4_USTMA	A0A0D1E724_USTMA	A0A0D1DS71_USTMA
cellular_component	GO:0005886	plasma membrane	19	171	0.111111	0.57176	0.516367	1	1	SLA1_USTMA	CHS7_USTMA	CHS8_USTMA	CHS5_USTMA	CHS1_USTMA	CYAA_USTMA	A0A0D1C917_USTMA	A0A0D1E0D6_USTMA	A0A0D1DY37_USTMA	A0A0D1CFZ1_USTMA	A0A0D1C321_USTMA	A0A0D1DYV8_USTMA	A0A0D1C1B9_USTMA	A0A0D1EBL3_USTMA	A0A0D1E5C3_USTMA	A0A0D1CPW3_USTMA	A0A0D1E0C2_USTMA	A0A0D1BVS5_USTMA	A0A0D1D1B0_USTMA
molecular_function	GO:0000978	RNA polymerase II cis-regulatory region sequence-specific DNA binding	19	61	0.311475	0.999999	4.17063e-06	1	0	A0A0D1CDH0_USTMA	A0A0D1DP88_USTMA	A0A0D1CI43_USTMA	A0A0D1CSA7_USTMA	A0A0D1DYA8_USTMA	A0A0D1DQY1_USTMA	A0A0D1DQX3_USTMA	A0A0D1CS44_USTMA	A0A0D1CA32_USTMA	A0A0D1CGS0_USTMA	A0A0D1BUZ6_USTMA	A0A0D1E6T9_USTMA	A0A0D1BW04_USTMA	A0A0D1DW26_USTMA	A0A0D1E351_USTMA	A0A0D1DVL4_USTMA	A0A0D1DYD0_USTMA	A0A0D1E5N8_USTMA	A0A0D1DV43_USTMA
biological_process	GO:0015031	protein transport	18	84	0.214286	0.998985	0.00178487	1	0.622	VTS1_USTMA	ATG2_USTMA	BRO1_USTMA	ATG9_USTMA	SNX3_USTMA	A0A0D1CZ47_USTMA	A0A0D1D0E6_USTMA	A0A0D1CSR0_USTMA	A0A0D1BW76_USTMA	A0A0D1DYZ9_USTMA	A0A0D1E2K5_USTMA	A0A0D1E6S7_USTMA	A0A0D1DTL0_USTMA	A0A0D1CDF3_USTMA	A0A0D1CA49_USTMA	A0A0D1E7J5_USTMA	A0A0D1C766_USTMA	A0A0D1C4U4_USTMA
biological_process	GO:0006351	transcription, DNA-templated	18	49	0.367347	1	5.85358e-10	1	0	A0A0D1DYX7_USTMA	A0A0D1CI43_USTMA	A0A0D1E461_USTMA	A0A0D1DWU7_USTMA	A0A0D1E6F1_USTMA	A0A0D1DTV6_USTMA	A0A0D1C0E5_USTMA	A0A0D1EB74_USTMA	A0A0D1DTF5_USTMA	A0A0D1E2K0_USTMA	A0A0D1EA12_USTMA	A0A0D1E179_USTMA	A0A0D1DYX4_USTMA	A0A0D1E9C1_USTMA	A0A0D1CHF9_USTMA	A0A0D1CGN3_USTMA	A0A0D1E3K0_USTMA	A0A0D1CIE9_USTMA
biological_process	GO:0006355	regulation of transcription, DNA-templated	16	61	0.262295	1	2.00202e-09	1	0	SET2_USTMA	A0A0D1E3P7_USTMA	A0A0D1E6F1_USTMA	A0A0D1CXD6_USTMA	A0A0D1EA01_USTMA	A0A0D1C735_USTMA	A0A0D1CWI1_USTMA	A0A0D1E2K0_USTMA	A0A0D1BUZ6_USTMA	A0A0D1DW26_USTMA	A0A0D1E0F6_USTMA	A0A0D1E9C1_USTMA	A0A0D1E0N8_USTMA	A0A0D1E1T4_USTMA	A0A0D1DXV2_USTMA	A0A0D1D1N3_USTMA
cellular_component	GO:0005789	endoplasmic reticulum membrane	15	112	0.133929	0.677317	0.410358	1	1	SEC31_USTMA	ATG2_USTMA	ATG9_USTMA	MDM12_USTMA	SEC24_USTMA	A0A0D1CKY1_USTMA	A0A0D1DQG5_USTMA	A0A0D1DXN0_USTMA	A0A0D1DTL0_USTMA	A0A0D1CA49_USTMA	A0A0D1CTA0_USTMA	A0A0D1E3E8_USTMA	A0A0D1CFI0_USTMA	A0A0D1DVD8_USTMA	A0A0D1C766_USTMA
biological_process	GO:0035556	intracellular signal transduction	15	46	0.326087	0.998956	0.0021504	1	0.666	IML1_USTMA	CYAA_USTMA	A0A0D1DTJ9_USTMA	A0A0D1DYS4_USTMA	A0A0D1C217_USTMA	A0A0D1E0I0_USTMA	A0A0D1EB32_USTMA	A0A0D1BUB7_USTMA	A0A0D1DSL6_USTMA	A0A0D1DRE2_USTMA	A0A0D1BVS5_USTMA	A0A0D1CAA1_USTMA	A0A0D1CAE8_USTMA	A0A0D1BZG9_USTMA	A0A0D1DS71_USTMA
cellular_component	GO:0005739	mitochondrion	14	273	0.0512821	6.88799e-06	0.999997	0.001	1	COQ4_USTMA	GABAT_USTMA	A0A0D1E264_USTMA	A0A0D1DUI3_USTMA	A0A0D1DYR5_USTMA	A0A0D1CYE8_USTMA	A0A0D1DYV1_USTMA	A0A0D1CVJ0_USTMA	A0A0D1CJ01_USTMA	A0A0D1DTH0_USTMA	A0A0D1C157_USTMA	A0A0D1CJW5_USTMA	A0A0D1EA29_USTMA	A0A0D1DTF9_USTMA
biological_process	GO:0006468	protein phosphorylation	12	35	0.342857	0.999744	0.000686758	1	0.288	SSN3_USTMA	EAF11_USTMA	A0A0D1DYS4_USTMA	A0A0D1C217_USTMA	A0A0D1CXP7_USTMA	A0A0D1E669_USTMA	A0A0D1CRA9_USTMA	A0A0D1DSL6_USTMA	A0A0D1BZG3_USTMA	A0A0D1BVS5_USTMA	A0A0D1CAA1_USTMA	A0A0D1DS71_USTMA
biological_process	GO:0000398	mRNA splicing, via spliceosome	11	68	0.161765	0.825137	0.265782	1	1	SYF1_USTMA	CWC26_USTMA	CLF1_USTMA	BBP_USTMA	A0A0D1DT51_USTMA	A0A0D1CHJ8_USTMA	A0A0D1E0F9_USTMA	A0A0D1BWX5_USTMA	A0A0D1CKR3_USTMA	A0A0D1BY36_USTMA	A0A0D1DYQ6_USTMA
biological_process	GO:0006886	intracellular protein transport	11	78	0.141026	0.973887	0.0413912	1	1	SEC31_USTMA	SEC24_USTMA	A0A0D1BWQ9_USTMA	A0A0D1E2T0_USTMA	A0A0D1DYV8_USTMA	A0A0D1E5F6_USTMA	A0A0D1DTQ6_USTMA	A0A0D1CDM1_USTMA	A0A0D1E639_USTMA	A0A0D1C9U0_USTMA	A0A0D1CQS0_USTMA
cellular_component	GO:0005730	nucleolus	11	119	0.092437	0.109233	0.936887	0.999	1	SPB4_USTMA	A0A0D1C4X1_USTMA	A0A0D1CQU2_USTMA	A0A0D1DQJ5_USTMA	A0A0D1E8R8_USTMA	A0A0D1DTQ7_USTMA	A0A0D1BYG5_USTMA	A0A0D1EAS0_USTMA	A0A0D1CU96_USTMA	A0A0D1CEA6_USTMA	A0A0D1BVX2_USTMA
molecular_function	GO:0005085	guanyl-nucleotide exchange factor activity	11	41	0.268293	0.999513	0.00183957	1	0.394	A0A0D1DTJ9_USTMA	A0A0D1CTU4_USTMA	A0A0D1DUS2_USTMA	A0A0D1C589_USTMA	A0A0D1DTD9_USTMA	A0A0D1CYY4_USTMA	A0A0D1CDF8_USTMA	A0A0D1DRK5_USTMA	A0A0D1DSQ2_USTMA	A0A0D1BZQ0_USTMA	A0A0D1E6N8_USTMA
molecular_function	GO:0003729	mRNA binding	10	65	0.153846	0.88763	0.195941	1	1	VTS1_USTMA	BBP_USTMA	A0A0D1E120_USTMA	A0A0D1EBV9_USTMA	A0A0D1DXB8_USTMA	A0A0D1DSI6_USTMA	A0A0D1CIH4_USTMA	A0A0D1DU52_USTMA	A0A0D1C6D7_USTMA	A0A0D1C3A9_USTMA
biological_process	GO:0045944	positive regulation of transcription by RNA polymerase II	10	40	0.25	0.99375	0.016052	1	1	STUA_USTMA	PACC_USTMA	A0A0D1CHB9_USTMA	A0A0D1CFL6_USTMA	A0A0D1EB74_USTMA	A0A0D1E5X6_USTMA	A0A0D1DXZ0_USTMA	A0A0D1EA12_USTMA	A0A0D1C149_USTMA	A0A0D1E5N8_USTMA
molecular_function	GO:0003700	DNA-binding transcription factor activity	10	26	0.384615	1	4.1438e-23	1	0	STUA_USTMA	A0A0D1DP88_USTMA	A0A0D1E1E8_USTMA	A0A0D1CWB2_USTMA	A0A0D1E5X6_USTMA	A0A0D1E6T9_USTMA	A0A0D1E914_USTMA	A0A0D1DRW6_USTMA	A0A0D1DYD0_USTMA	A0A0D1DQC2_USTMA
biological_process	GO:0006511	ubiquitin-dependent protein catabolic process	9	46	0.195652	0.721636	0.37138	1	1	A0A0D1DYV9_USTMA	A0A0D1D175_USTMA	A0A0D1E262_USTMA	A0A0D1BWR7_USTMA	A0A0D1DZ94_USTMA	A0A0D1D0N8_USTMA	A0A0D1EBZ2_USTMA	A0A0D1ED14_USTMA	A0A0D1DYN0_USTMA
molecular_function	GO:0000976	transcription cis-regulatory region binding	9	24	0.375	1	1.35034e-10	1	0	A0A0D1E5Q5_USTMA	A0A0D1E3P7_USTMA	A0A0D1E6F1_USTMA	A0A0D1CXD6_USTMA	A0A0D1E2K0_USTMA	A0A0D1E9C1_USTMA	A0A0D1E0N8_USTMA	A0A0D1DQR1_USTMA	A0A0D1DXV2_USTMA
molecular_function	GO:0043130	ubiquitin binding	8	23	0.347826	0.999778	0.00124776	1	0.305	SLA1_USTMA	VPS27_USTMA	HSE1_USTMA	A0A0D1CR50_USTMA	A0A0D1E233_USTMA	A0A0D1E695_USTMA	A0A0D1ED14_USTMA	A0A0D1E5U7_USTMA
biological_process	GO:0006897	endocytosis	8	37	0.216216	0.995143	0.0142431	1	0.999	SLA1_USTMA	A0A0D1DTJ9_USTMA	A0A0D1C917_USTMA	A0A0D1DY37_USTMA	A0A0D1E233_USTMA	A0A0D1DPJ0_USTMA	A0A0D1DYA9_USTMA	A0A0D1EA76_USTMA
molecular_function	GO:0005525	GTP binding	8	96	0.0833333	0.357081	0.766561	1	1	A0A0D1E0D6_USTMA	A0A0D1CH86_USTMA	A0A0D1E5F6_USTMA	A0A0D1DQS9_USTMA	A0A0D1E2B9_USTMA	A0A0D1CU96_USTMA	A0A0D1CPV5_USTMA	A0A0D1DSQ2_USTMA
molecular_function	GO:0106310	protein serine kinase activity	8	30	0.266667	0.997954	0.00792645	1	0.842	SSN3_USTMA	A0A0D1EB32_USTMA	A0A0D1BUB7_USTMA	A0A0D1DRE2_USTMA	A0A0D1EA76_USTMA	A0A0D1BVS5_USTMA	A0A0D1E0L4_USTMA	A0A0D1DS71_USTMA
molecular_function	GO:0106311	protein serine/threonine kinase activity	8	31	0.258065	NA	NA	NA	NA	SSN3_USTMA	A0A0D1EB32_USTMA	A0A0D1BUB7_USTMA	A0A0D1DRE2_USTMA	A0A0D1EA76_USTMA	A0A0D1BVS5_USTMA	A0A0D1E0L4_USTMA	A0A0D1DS71_USTMA
molecular_function	GO:0035091	phosphatidylinositol binding	8	22	0.363636	0.999994	3.40833e-05	1	0.008	VPS27_USTMA	HSE1_USTMA	A0A0D1D0E6_USTMA	A0A0D1BW76_USTMA	A0A0D1CH04_USTMA	A0A0D1E233_USTMA	A0A0D1E695_USTMA	A0A0D1CDF3_USTMA
molecular_function	GO:0061630	ubiquitin protein ligase activity	8	39	0.205128	0.981515	0.048721	1	1	A0A0D1C2L7_USTMA	A0A0D1CR28_USTMA	A0A0D1D175_USTMA	A0A0D1CFV9_USTMA	A0A0D1DVT1_USTMA	A0A0D1D0N8_USTMA	A0A0D1DYN0_USTMA	A0A0D1CWR4_USTMA
biological_process	GO:0007165	signal transduction	8	24	0.333333	0.999931	0.000148212	1	0.061	A0A0D1E6A7_USTMA	A0A0D1CE90_USTMA	A0A0D1EDE4_USTMA	A0A0D1BWE6_USTMA	A0A0D1CDF3_USTMA	A0A0D1BZN3_USTMA	A0A0D1CG39_USTMA	A0A0D1DYK4_USTMA
molecular_function	GO:0003682	chromatin binding	7	29	0.241379	0.951279	0.112697	1	1	A0A0D1CRL6_USTMA	A0A0D1CI18_USTMA	A0A0D1CI28_USTMA	A0A0D1DZS4_USTMA	A0A0D1DWG5_USTMA	A0A0D1E243_USTMA	A0A0D1C149_USTMA
cellular_component	GO:0005783	endoplasmic reticulum	7	104	0.0673077	0.383942	0.690957	1	1	CLCNX_USTMA	MMM1_USTMA	A0A0D1E2T0_USTMA	A0A0D1DTL0_USTMA	A0A0D1E449_USTMA	A0A0D1CWA9_USTMA	A0A0D1CJE8_USTMA
molecular_function	GO:0005096	GTPase activator activity	7	34	0.205882	0.998288	0.0045722	1	0.724	IML1_USTMA	A0A0D1DUS2_USTMA	A0A0D1DSP2_USTMA	A0A0D1DYA9_USTMA	A0A0D1DTD9_USTMA	A0A0D1C9U0_USTMA	A0A0D1E6N8_USTMA
biological_process	GO:0018105	peptidyl-serine phosphorylation	7	22	0.318182	0.998784	0.00580805	1	0.931	A0A0D1DPJ8_USTMA	A0A0D1DPG6_USTMA	A0A0D1DRE2_USTMA	A0A0D1EA76_USTMA	A0A0D1CAE8_USTMA	A0A0D1BZG9_USTMA	A0A0D1E724_USTMA
molecular_function	GO:0005509	calcium ion binding	7	36	0.194444	0.976003	0.0642318	1	1	A0A0D1DTJ9_USTMA	A0A0D1E741_USTMA	A0A0D1CVJ0_USTMA	A0A0D1C0M4_USTMA	A0A0D1DZY4_USTMA	A0A0D1DPJ0_USTMA	A0A0D1DUR5_USTMA
biological_process	GO:0000122	negative regulation of transcription by RNA polymerase II	7	21	0.333333	0.997687	0.00978735	1	0.974	A0A0D1BWL5_USTMA	A0A0D1CFL6_USTMA	A0A0D1EAA7_USTMA	A0A0D1DSI6_USTMA	A0A0D1E0F6_USTMA	A0A0D1CR21_USTMA	A0A0D1E4I7_USTMA
molecular_function	GO:0017056	structural constituent of nuclear pore	7	16	0.4375	0.999938	0.000512592	1	0.121	A0A0D1CZ47_USTMA	A0A0D1DYC5_USTMA	A0A0D1C3H2_USTMA	A0A0D1EAJ6_USTMA	A0A0D1E6S7_USTMA	A0A0D1E1J0_USTMA	A0A0D1CRF0_USTMA
molecular_function	GO:0003697	single-stranded DNA binding	6	35	0.171429	0.957179	0.101774	1	1	MG101_USTMA	A0A0D1DU59_USTMA	A0A0D1E3R7_USTMA	A0A0D1E3U8_USTMA	A0A0D1E3Q0_USTMA	A0A0D1E288_USTMA
molecular_function	GO:0003924	GTPase activity	6	79	0.0759494	0.302488	0.822578	1	1	A0A0D1E0D6_USTMA	A0A0D1CH86_USTMA	A0A0D1E5F6_USTMA	A0A0D1E2B9_USTMA	A0A0D1CPV5_USTMA	A0A0D1DSQ2_USTMA
cellular_component	GO:0071014	post-mRNA release spliceosomal complex	6	19	0.315789	0.997503	0.0117461	1	0.947	SYF1_USTMA	CLF1_USTMA	A0A0D1E0F9_USTMA	A0A0D1DYQ6_USTMA	A0A0D1C6D7_USTMA	A0A0D1C3A9_USTMA
molecular_function	GO:0003676	nucleic acid binding	6	65	0.0923077	0.999998	3.84496e-06	1	0	A0A0D1EAB9_USTMA	A0A0D1E8R8_USTMA	A0A0D1CN71_USTMA	A0A0D1CFV9_USTMA	A0A0D1DVA3_USTMA	A0A0D1DYQ6_USTMA
cellular_component	GO:0000785	chromatin	6	33	0.181818	0.984542	0.0320235	1	0.998	SET2_USTMA	A0A0D1C3I0_USTMA	A0A0D1BW04_USTMA	A0A0D1DZS4_USTMA	A0A0D1E288_USTMA	A0A0D1E4I7_USTMA
cellular_component	GO:0005768	endosome	6	27	0.222222	0.996663	0.00781208	1	0.7	AP1G1_USTMA	BRO1_USTMA	A0A0D1C917_USTMA	A0A0D1DY37_USTMA	A0A0D1BW76_USTMA	A0A0D1E2K5_USTMA
cellular_component	GO:0016020	membrane	6	160	0.0375	0.00585083	0.995713	0.186	1	A0A0D1BWQ9_USTMA	A0A0D1CF49_USTMA	A0A0D1DZY4_USTMA	A0A0D1CQS0_USTMA	A0A0D1CJE8_USTMA	A0A0D1C4U4_USTMA
molecular_function	GO:0003712	transcription coregulator activity	6	25	0.24	0.957984	0.0949303	1	1	MED7_USTMA	A0A0D1DUT0_USTMA	A0A0D1CZI1_USTMA	A0A0D1DSH3_USTMA	A0A0D1CMK5_USTMA	A0A0D1DQR1_USTMA
molecular_function	GO:0030170	pyridoxal phosphate binding	6	45	0.133333	0.837886	0.298254	1	1	GABAT_USTMA	A0A0D1CG70_USTMA	A0A0D1DQV3_USTMA	A0A0D1CRS2_USTMA	A0A0D1DSN7_USTMA	A0A0D1CWW1_USTMA
molecular_function	GO:0004672	protein kinase activity	6	20	0.3	1	1.20683e-06	1	0	EAF11_USTMA	A0A0D1CLZ9_USTMA	A0A0D1E2I8_USTMA	A0A0D1E312_USTMA	A0A0D1DQ09_USTMA	A0A0D1DV51_USTMA
molecular_function	GO:0043565	sequence-specific DNA binding	6	16	0.375	1	7.40464e-12	1	0	STUA_USTMA	A0A0D1E1E8_USTMA	A0A0D1CI28_USTMA	A0A0D1EA12_USTMA	A0A0D1E3U8_USTMA	A0A0D1D1N3_USTMA
cellular_component	GO:0005938	cell cortex	6	15	0.4	0.99452	0.0132505	1	0.952	A0A0D1E0D6_USTMA	A0A0D1DYR5_USTMA	A0A0D1DSL6_USTMA	A0A0D1DSG8_USTMA	A0A0D1BZG9_USTMA	A0A0D1DS71_USTMA
biological_process	GO:0007264	small GTPase mediated signal transduction	6	17	0.352941	0.973687	0.0693841	1	1	A0A0D1E0D6_USTMA	A0A0D1C589_USTMA	A0A0D1DSP2_USTMA	A0A0D1DRK5_USTMA	A0A0D1BZQ0_USTMA	A0A0D1E6N8_USTMA
molecular_function	GO:0140603	obsolete ATP hydrolysis activity	5	43	0.116279	0.737784	0.43992	1	1	SWR1_USTMA	SPB4_USTMA	A0A0D1DT51_USTMA	A0A0D1CH16_USTMA	A0A0D1E288_USTMA
cellular_component	GO:0010008	endosome membrane	5	13	0.384615	0.991955	0.0246233	1	0.989	SLA1_USTMA	VPS27_USTMA	HSE1_USTMA	A0A0D1DMX3_USTMA	A0A0D1C9Y1_USTMA
molecular_function	GO:0003779	actin binding	5	13	0.384615	0.875788	0.244647	1	1	SLA1_USTMA	CHS8_USTMA	A0A0D1DTJ9_USTMA	A0A0D1BX38_USTMA	A0A0D1DPJ0_USTMA
cellular_component	GO:0000932	P-body	5	27	0.185185	0.950977	0.13105	1	1	VTS1_USTMA	A0A0D1DQ67_USTMA	A0A0D1DW69_USTMA	A0A0D1EAA3_USTMA	A0A0D1EA01_USTMA
biological_process	GO:0006457	protein folding	5	41	0.121951	0.301755	0.8323	1	1	A0A0D1DRE3_USTMA	A0A0D1C5F5_USTMA	A0A0D1DZE7_USTMA	A0A0D1CJW5_USTMA	A0A0D1DZ28_USTMA
cellular_component	GO:0000329	fungal-type vacuole membrane	5	48	0.104167	0.851879	0.258439	1	1	A0A0D1DMX3_USTMA	A0A0D1CI78_USTMA	A0A0D1CH16_USTMA	A0A0D1CQS0_USTMA	A0A0D1DVI4_USTMA
molecular_function	GO:0004725	protein tyrosine phosphatase activity	5	20	0.25	0.988516	0.0440666	1	1	A0A0D1DU82_USTMA	A0A0D1DPZ6_USTMA	A0A0D1BUB4_USTMA	A0A0D1E0C2_USTMA	A0A0D1DRB9_USTMA
molecular_function	GO:0051082	unfolded protein binding	5	50	0.1	0.60867	0.577361	1	1	A0A0D1DRE3_USTMA	A0A0D1C5F5_USTMA	A0A0D1DZE7_USTMA	A0A0D1E0L4_USTMA	A0A0D1DZ28_USTMA
cellular_component	GO:0071944	cell periphery	5	10	0.5	0.785396	0.274011	1	1	CHS7_USTMA	CHS8_USTMA	CHS5_USTMA	CHS1_USTMA	A0A0D1BUU2_USTMA
cellular_component	GO:0030428	cell septum	5	9	0.555556	0.999996	5.24887e-05	1	0.009	CHS7_USTMA	CHS8_USTMA	CHS5_USTMA	CHS1_USTMA	A0A0D1E0F1_USTMA
cellular_component	GO:0030659	cytoplasmic vesicle membrane	5	11	0.454545	0.999974	0.000121491	1	0.021	CHS7_USTMA	CHS8_USTMA	CHS5_USTMA	ATG9_USTMA	CHS1_USTMA
molecular_function	GO:0046982	protein heterodimerization activity	5	29	0.172414	0.934901	0.161619	1	1	A0A0D1C8N6_USTMA	A0A0D1CZI1_USTMA	A0A0D1E5X6_USTMA	A0A0D1CWI1_USTMA	Q4P042_USTMA
molecular_function	GO:0000977	RNA polymerase II transcription regulatory region sequence-specific DNA binding	5	10	0.5	1	5.11955e-08	1	0	A0A0D1D1U5_USTMA	A0A0D1EAA7_USTMA	A0A0D1E0F6_USTMA	A0A0D1E914_USTMA	A0A0D1DUA4_USTMA
molecular_function	GO:0019901	protein kinase binding	5	20	0.25	0.981403	0.0634155	1	1	A0A0D1E0D6_USTMA	A0A0D1DQC1_USTMA	A0A0D1E669_USTMA	A0A0D1DRE3_USTMA	A0A0D1DRS0_USTMA
molecular_function	GO:0046983	protein dimerization activity	5	20	0.25	0.985311	0.0362079	1	1	A0A0D1CSA7_USTMA	A0A0D1DQX3_USTMA	A0A0D1DRD3_USTMA	A0A0D1E351_USTMA	A0A0D1E5N8_USTMA
biological_process	GO:0006874	cellular calcium ion homeostasis	5	14	0.357143	0.98568	0.0523489	1	1	A0A0D1DXP0_USTMA	A0A0D1DXI2_USTMA	A0A0D1C0M4_USTMA	A0A0D1DUR5_USTMA	A0A0D1CH16_USTMA
molecular_function	GO:0042802	identical protein binding	4	21	0.190476	0.900001	0.240524	1	1	SLA1_USTMA	A0A0D1DSN7_USTMA	A0A0D1BZG9_USTMA	A0A0D1DSQ2_USTMA
cellular_component	GO:0043231	intracellular membrane-bounded organelle	4	45	0.0888889	0.990655	0.0123769	1	0.95	A0A0D1E0D6_USTMA	A0A0D1DXP0_USTMA	A0A0D1DY37_USTMA	A0A0D1E641_USTMA
cellular_component	GO:0016592	mediator complex	4	16	0.25	0.982312	0.0707029	1	1	SSN3_USTMA	MED7_USTMA	A0A0D1DUT0_USTMA	A0A0D1DQR1_USTMA
molecular_function	GO:0016787	hydrolase activity	4	77	0.0519481	0.000646535	0.999607	0.021	1	YUM14_USTMA	A0A0D1E8R8_USTMA	A0A0D1CGW4_USTMA	A0A0D1DTQ8_USTMA
biological_process	GO:0000209	protein polyubiquitination	4	29	0.137931	0.712957	0.490809	1	1	A0A0D1DVT1_USTMA	A0A0D1D0N8_USTMA	A0A0D1DYN0_USTMA	A0A0D1CWR4_USTMA
cellular_component	GO:0070971	endoplasmic reticulum exit site	4	6	0.666667	0.999943	0.00131848	1	0.236	SEC31_USTMA	SEC24_USTMA	A0A0D1E639_USTMA	A0A0D1C766_USTMA
cellular_component	GO:0000139	Golgi membrane	4	43	0.0930233	0.541793	0.626073	1	1	ATG9_USTMA	SNX3_USTMA	SEC24_USTMA	A0A0D1DTQ6_USTMA
cellular_component	GO:0005794	Golgi apparatus	4	58	0.0689655	0.772166	0.313591	1	1	CLCNX_USTMA	A0A0D1C1B9_USTMA	A0A0D1E5F6_USTMA	A0A0D1CWA9_USTMA
biological_process	GO:0006888	endoplasmic reticulum to Golgi vesicle-mediated transport	4	48	0.0833333	0.869199	0.234933	1	1	A0A0D1E2T0_USTMA	A0A0D1DTQ6_USTMA	A0A0D1DYA9_USTMA	A0A0D1CJE8_USTMA
cellular_component	GO:1990904	ribonucleoprotein complex	4	19	0.210526	0.0283567	0.982237	0.693	1	A0A0D1E5T9_USTMA	A0A0D1E733_USTMA	A0A0D1C6D7_USTMA	A0A0D1C3A9_USTMA
biological_process	GO:0042147	retrograde transport, endosome to Golgi	4	26	0.153846	0.93218	0.167075	1	1	AP1G1_USTMA	A0A0D1BW76_USTMA	A0A0D1DYZ9_USTMA	A0A0D1C9Y1_USTMA
molecular_function	GO:0004100	chitin synthase activity	4	8	0.5	0.99956	0.00512238	1	0.767	CHS7_USTMA	CHS8_USTMA	CHS5_USTMA	CHS1_USTMA
biological_process	GO:0071555	cell wall organization	4	17	0.235294	0.776896	0.377503	1	1	CHS7_USTMA	CHS8_USTMA	CHS5_USTMA	CHS1_USTMA
cellular_component	GO:0016514	SWI/SNF complex	4	7	0.571429	0.999816	0.00283103	1	0.369	A0A0D1E5Q5_USTMA	A0A0D1DSH3_USTMA	A0A0D1DXZ0_USTMA	A0A0D1DQR1_USTMA
cellular_component	GO:0000776	kinetochore	4	21	0.190476	0.925822	0.165801	1	1	A0A0D1DPJ8_USTMA	A0A0D1EAB9_USTMA	A0A0D1E8Y7_USTMA	A0A0D1DQ09_USTMA
cellular_component	GO:0030176	integral component of endoplasmic reticulum membrane	4	47	0.0851064	0.245253	0.879369	1	1	MMM1_USTMA	A0A0D1DW30_USTMA	A0A0D1DTN0_USTMA	A0A0D1CJE8_USTMA
biological_process	GO:0007015	actin filament organization	4	18	0.222222	0.757017	0.41788	1	1	A0A0D1E0D6_USTMA	A0A0D1DY37_USTMA	A0A0D1CRA9_USTMA	A0A0D1E233_USTMA
biological_process	GO:0006508	proteolysis	4	13	0.307692	0.676472	0.404754	1	1	A0A0D1E6M8_USTMA	A0A0D1DQ65_USTMA	A0A0D1DX26_USTMA	A0A0D1E8Z6_USTMA
molecular_function	GO:0000149	SNARE binding	4	15	0.266667	0.976915	0.0746185	1	1	SEC24_USTMA	A0A0D1DYV8_USTMA	A0A0D1E639_USTMA	A0A0D1E2P1_USTMA
cellular_component	GO:0005778	peroxisomal membrane	4	18	0.222222	0.911783	0.22052	1	1	A0A0D1E6M2_USTMA	A0A0D1E3E8_USTMA	A0A0D1DZH3_USTMA	A0A0D1C6B6_USTMA
biological_process	GO:0006470	protein dephosphorylation	4	17	0.235294	0.81442	0.367786	1	1	A0A0D1DU82_USTMA	A0A0D1CI23_USTMA	A0A0D1E0C2_USTMA	A0A0D1DRB9_USTMA
biological_process	GO:0006891	intra-Golgi vesicle-mediated transport	4	24	0.166667	0.898444	0.243771	1	1	A0A0D1BWQ9_USTMA	A0A0D1DTQ6_USTMA	A0A0D1DYA9_USTMA	A0A0D1C4U4_USTMA
biological_process	GO:0016567	protein ubiquitination	4	30	0.133333	0.712145	0.430497	1	1	A0A0D1C2L7_USTMA	A0A0D1E4H5_USTMA	A0A0D1CR28_USTMA	A0A0D1DVT1_USTMA
biological_process	GO:0006890	retrograde vesicle-mediated transport, Golgi to endoplasmic reticulum	4	21	0.190476	0.937013	0.1748	1	1	A0A0D1C917_USTMA	A0A0D1DTQ6_USTMA	A0A0D1DTL0_USTMA	A0A0D1CJE8_USTMA
molecular_function	GO:0001228	DNA-binding transcription activator activity, RNA polymerase II-specific	4	9	0.444444	0.999092	0.00849359	1	0.871	A0A0D1CI43_USTMA	A0A0D1D1U5_USTMA	A0A0D1CGS0_USTMA	A0A0D1CWI1_USTMA
biological_process	GO:0043087	regulation of GTPase activity	4	9	0.444444	0.971572	0.0876153	1	1	A0A0D1CE90_USTMA	A0A0D1EDE4_USTMA	A0A0D1CDF3_USTMA	A0A0D1BZN3_USTMA
biological_process	GO:0043044	chromatin remodeling	3	13	0.230769	NA	NA	NA	NA	SWR1_USTMA	A0A0D1CI18_USTMA	A0A0D1E243_USTMA
cellular_component	GO:0030479	actin cortical patch	3	23	0.130435	0.80153	0.416525	1	1	SLA1_USTMA	A0A0D1DTJ9_USTMA	A0A0D1E233_USTMA
cellular_component	GO:0000124	SAGA complex	3	14	0.214286	0.954341	0.162505	1	1	A0A0D1C8N6_USTMA	A0A0D1CZI1_USTMA	A0A0D1CMK5_USTMA
biological_process	GO:0016973	poly(A)+ mRNA export from nucleus	3	18	0.166667	0.885766	0.294898	1	1	A0A0D1C4X1_USTMA	A0A0D1C6D7_USTMA	A0A0D1C3A9_USTMA
biological_process	GO:0006397	mRNA processing	3	32	0.09375	0.84305	0.224821	1	1	A0A0D1E225_USTMA	A0A0D1CFV9_USTMA	A0A0D1E0L4_USTMA
cellular_component	GO:0005887	integral component of plasma membrane	3	47	0.0638298	0.284281	0.869095	1	1	CLCNX_USTMA	A0A0D1DXP0_USTMA	A0A0D1E456_USTMA
molecular_function	GO:0022857	transmembrane transporter activity	3	75	0.04	0.000750614	0.999644	0.022	1	A0A0D1CS33_USTMA	A0A0D1C461_USTMA	A0A0D1E456_USTMA
cellular_component	GO:0005681	spliceosomal complex	3	27	0.111111	0.830651	0.262585	1	1	BBP_USTMA	A0A0D1DT51_USTMA	A0A0D1E3Q8_USTMA
cellular_component	GO:0005686	U2 snRNP	3	20	0.15	0.862866	0.330367	1	1	A0A0D1C165_USTMA	A0A0D1BWX5_USTMA	A0A0D1CKR3_USTMA
cellular_component	GO:0030127	COPII vesicle coat	3	6	0.5	0.998682	0.0163381	1	0.972	SEC31_USTMA	SEC24_USTMA	A0A0D1E639_USTMA
molecular_function	GO:0005198	structural molecule activity	3	13	0.230769	0.0811701	0.953748	0.999	1	SEC31_USTMA	A0A0D1DTQ6_USTMA	A0A0D1DZ94_USTMA
biological_process	GO:0006606	protein import into nucleus	3	26	0.115385	0.81442	0.367786	1	1	A0A0D1DYC5_USTMA	A0A0D1C3H2_USTMA	A0A0D1EAJ6_USTMA
molecular_function	GO:0016538	cyclin-dependent protein serine/threonine kinase regulator activity	3	15	0.2	0.915799	0.241781	1	1	A0A0D1DQC1_USTMA	A0A0D1DRS0_USTMA	A0A0D1CL12_USTMA
molecular_function	GO:0000287	magnesium ion binding	3	38	0.0789474	0.45744	0.752779	1	1	A0A0D1C917_USTMA	A0A0D1CPW3_USTMA	A0A0D1DSQ2_USTMA
biological_process	GO:0090110	COPII-coated vesicle cargo loading	3	4	0.75	0.999877	0.00431899	1	0.903	SEC31_USTMA	SEC24_USTMA	A0A0D1E639_USTMA
biological_process	GO:0000724	double-strand break repair via homologous recombination	3	26	0.115385	0.894047	0.207241	1	1	A0A0D1BXI7_USTMA	A0A0D1CDD4_USTMA	A0A0D1C943_USTMA
cellular_component	GO:0005759	mitochondrial matrix	3	36	0.0833333	0.106471	0.9489	0.997	1	A0A0D1CI67_USTMA	A0A0D1DSN7_USTMA	A0A0D1DQ65_USTMA
biological_process	GO:0006412	translation	3	112	0.0267857	0.00365003	0.998265	0.321	1	RT03_USTMA	A0A0D1DSQ2_USTMA	A0A0D1DTL3_USTMA
molecular_function	GO:0003724	RNA helicase activity	3	32	0.09375	0.59407	0.639955	1	1	SPB4_USTMA	A0A0D1DT51_USTMA	A0A0D1E8R8_USTMA
biological_process	GO:0006364	rRNA processing	3	67	0.0447761	0.00876934	0.996522	0.617	1	SPB4_USTMA	A0A0D1C4X1_USTMA	A0A0D1BYG5_USTMA
biological_process	GO:0000226	microtubule cytoskeleton organization	3	13	0.230769	0.727013	0.43657	1	1	STU1_USTMA	A0A0D1DYR5_USTMA	A0A0D1E0Z1_USTMA
biological_process	GO:0000278	mitotic cell cycle	3	21	0.142857	0.846508	0.222447	1	1	A0A0D1BZI3_USTMA	A0A0D1EB32_USTMA	A0A0D1DSG8_USTMA
cellular_component	GO:0034045	phagophore assembly site membrane	3	9	0.333333	0.986738	0.0721933	1	1	ATG2_USTMA	ATG9_USTMA	A0A0D1DPG6_USTMA
biological_process	GO:0000422	autophagy of mitochondrion	3	13	0.230769	0.947859	0.177914	1	1	ATG2_USTMA	ATG9_USTMA	A0A0D1DPG6_USTMA
biological_process	GO:0044805	late nucleophagy	3	5	0.6	0.999437	0.00995222	1	0.985	ATG2_USTMA	ATG9_USTMA	A0A0D1DPG6_USTMA
biological_process	GO:0006896	Golgi to vacuole transport	3	10	0.3	0.984641	0.0800355	1	1	AP1G1_USTMA	A0A0D1E695_USTMA	A0A0D1DYZ9_USTMA
molecular_function	GO:0016491	oxidoreductase activity	3	123	0.0243902	2.1689e-10	1	0	1	A0A0D1CYE8_USTMA	A0A0D1DUF5_USTMA	A0A0D1CGX8_USTMA
molecular_function	GO:0032266	phosphatidylinositol-3-phosphate binding	3	8	0.375	0.994878	0.0387432	1	1	ATG2_USTMA	SNX3_USTMA	A0A0D1CR50_USTMA
molecular_function	GO:0003743	translation initiation factor activity	3	37	0.0810811	0.479191	0.736183	1	1	EIF3L_USTMA	EIF3E_USTMA	A0A0D1DU52_USTMA
biological_process	GO:0016573	histone acetylation	3	13	0.230769	0.779931	0.444696	1	1	A0A0D1E5B1_USTMA	A0A0D1CZI1_USTMA	A0A0D1CNC6_USTMA
biological_process	GO:0016575	histone deacetylation	3	8	0.375	0.96947	0.125475	1	1	A0A0D1BWL5_USTMA	A0A0D1DU17_USTMA	A0A0D1E4I7_USTMA
biological_process	GO:0000002	mitochondrial genome maintenance	3	11	0.272727	0.919809	0.23509	1	1	MDM12_USTMA	MG101_USTMA	MMM1_USTMA
biological_process	GO:0007005	mitochondrion organization	3	10	0.3	0.430772	0.68363	1	1	A0A0D1CJW5_USTMA	A0A0D1EA29_USTMA	A0A0D1E7J5_USTMA
cellular_component	GO:0032153	cell division site	3	17	0.176471	0.934418	0.150943	1	1	A0A0D1EBL3_USTMA	A0A0D1D1B0_USTMA	A0A0D1CPV5_USTMA
biological_process	GO:0006612	protein targeting to membrane	3	10	0.3	0.93218	0.167075	1	1	A0A0D1E641_USTMA	A0A0D1E3Z5_USTMA	A0A0D1CWA9_USTMA
biological_process	GO:0043328	protein transport to vacuole involved in ubiquitin-dependent protein catabolic process via the multivesicular body sorting pathway	3	12	0.25	0.96947	0.125475	1	1	HSE1_USTMA	A0A0D1CR50_USTMA	A0A0D1E695_USTMA
biological_process	GO:0000288	nuclear-transcribed mRNA catabolic process, deadenylation-dependent decay	3	5	0.6	0.998305	0.0076073	1	0.959	A0A0D1DQ67_USTMA	A0A0D1EBV9_USTMA	A0A0D1DSQ2_USTMA
molecular_function	GO:0004843	thiol-dependent deubiquitinase	3	21	0.142857	0.845263	0.356474	1	1	A0A0D1BWR7_USTMA	A0A0D1EBZ2_USTMA	A0A0D1BUU2_USTMA
cellular_component	GO:0000307	cyclin-dependent protein kinase holoenzyme complex	3	14	0.214286	0.96343	0.118676	1	1	A0A0D1DQC1_USTMA	A0A0D1BZG3_USTMA	A0A0D1DRS0_USTMA
cellular_component	GO:0005856	cytoskeleton	3	16	0.1875	0.964083	0.0616217	1	1	A0A0D1E1D6_USTMA	A0A0D1E0D6_USTMA	A0A0D1DPJ0_USTMA
biological_process	GO:0006486	protein glycosylation	3	8	0.375	0.674564	0.494578	1	1	A0A0D1DQG5_USTMA	A0A0D1CA49_USTMA	A0A0D1C7S9_USTMA
biological_process	GO:0030010	establishment of cell polarity	3	6	0.5	0.997937	0.0153591	1	0.999	A0A0D1CTU4_USTMA	A0A0D1CV21_USTMA	A0A0D1E0F1_USTMA
biological_process	GO:0006887	exocytosis	3	16	0.1875	0.802967	0.415397	1	1	A0A0D1DYV8_USTMA	A0A0D1E5C3_USTMA	A0A0D1E3Z5_USTMA
biological_process	GO:0070588	calcium ion transmembrane transport	3	10	0.3	0.947859	0.177914	1	1	A0A0D1DXI2_USTMA	A0A0D1C0M4_USTMA	A0A0D1DUR5_USTMA
molecular_function	GO:0005543	phospholipid binding	3	7	0.428571	0.999998	9.17467e-06	1	0.002	A0A0D1DYR5_USTMA	A0A0D1DY37_USTMA	A0A0D1EBL3_USTMA
cellular_component	GO:0000221	vacuolar proton-transporting V-type ATPase, V1 domain	3	4	0.75	0.999896	0.00381795	1	0.527	A0A0D1DTV7_USTMA	A0A0D1DVY9_USTMA	A0A0D1DVI4_USTMA
molecular_function	GO:0008094	ATP-dependent activity, acting on DNA	2	13	0.153846	0.396074	0.734704	1	1	A0A0D1CF39_USTMA	A0A0D1E3Q0_USTMA
molecular_function	GO:0070615	ATP-dependent chromatin remodeler activity	2	17	0.117647	NA	NA	NA	NA	SWR1_USTMA	A0A0D1CWR4_USTMA
biological_process	GO:0006281	DNA repair	2	50	0.04	0.270769	0.810212	1	1	EAF11_USTMA	A0A0D1C3F5_USTMA
cellular_component	GO:0005576	extracellular region	2	31	0.0645161	0.555911	0.646775	1	1	A0A0D1CZV5_USTMA	A0A0D1DRZ0_USTMA
molecular_function	GO:0003678	DNA helicase activity	2	11	0.181818	0.478368	0.772466	1	1	SWR1_USTMA	A0A0D1E288_USTMA
molecular_function	GO:0042393	histone binding	2	23	0.0869565	0.689472	0.546964	1	1	SWR1_USTMA	A0A0D1C149_USTMA
biological_process	GO:0044396	actin cortical patch organization	2	7	0.285714	0.989959	0.0606326	1	1	SLA1_USTMA	A0A0D1DTJ9_USTMA
biological_process	GO:0016197	endosomal transport	2	5	0.4	0.990903	0.0231296	1	1	SLA1_USTMA	A0A0D1DTJ9_USTMA
cellular_component	GO:0005643	nuclear pore	2	15	0.133333	0.991845	0.0269981	1	0.996	A0A0D1CZ47_USTMA	A0A0D1E6S7_USTMA
biological_process	GO:0006325	chromatin organization	2	10	0.2	0.91774	0.131153	1	1	EAF11_USTMA	A0A0D1CPX3_USTMA
cellular_component	GO:0000974	Prp19 complex	2	12	0.166667	0.886097	0.346982	1	1	SYF1_USTMA	CLF1_USTMA
cellular_component	GO:0071007	U2-type catalytic step 2 spliceosome	2	5	0.4	0.991172	0.0832386	1	1	SYF1_USTMA	CLF1_USTMA
biological_process	GO:0051028	mRNA transport	2	7	0.285714	0.958617	0.0993714	1	1	A0A0D1CZ47_USTMA	A0A0D1E6S7_USTMA
biological_process	GO:0007029	endoplasmic reticulum organization	2	3	0.666667	0.705102	0.581749	1	1	SEC31_USTMA	A0A0D1C766_USTMA
cellular_component	GO:0030686	90S preribosome	2	11	0.181818	0.44972	0.792065	1	1	A0A0D1C4X1_USTMA	A0A0D1CQU2_USTMA
biological_process	GO:0030433	ubiquitin-dependent ERAD pathway	2	24	0.0833333	0.5266	0.738079	1	1	A0A0D1CKY1_USTMA	A0A0D1DX55_USTMA
molecular_function	GO:0004693	cyclin-dependent protein serine/threonine kinase activity	2	7	0.285714	0.973865	0.151594	1	1	SSN3_USTMA	A0A0D1BZG3_USTMA
molecular_function	GO:0008353	RNA polymerase II CTD heptapeptide repeat kinase activity	2	4	0.5	0.996234	0.053009	1	1	SSN3_USTMA	A0A0D1BZG3_USTMA
biological_process	GO:0002098	tRNA wobble uridine modification	2	12	0.166667	0.705102	0.581749	1	1	CTU1_USTMA	A0A0D1BUB7_USTMA
biological_process	GO:0017148	negative regulation of translation	2	6	0.333333	0.995414	0.0155612	1	0.999	VTS1_USTMA	A0A0D1DQ67_USTMA
biological_process	GO:0000289	nuclear-transcribed mRNA poly(A) tail shortening	2	6	0.333333	0.970365	0.163811	1	1	VTS1_USTMA	A0A0D1EA01_USTMA
molecular_function	GO:0003735	structural constituent of ribosome	2	139	0.0143885	4.31208e-05	0.999995	0.001	1	RT03_USTMA	A0A0D1DTL3_USTMA
cellular_component	GO:0005874	microtubule	2	27	0.0740741	0.896254	0.213747	1	1	A0A0D1BZI3_USTMA	A0A0D1E0Z1_USTMA
cellular_component	GO:0032040	small-subunit processome	2	35	0.0571429	0.296494	0.883333	1	1	A0A0D1BYG5_USTMA	A0A0D1EAS0_USTMA
biological_process	GO:0000045	autophagosome assembly	2	16	0.125	0.898444	0.243771	1	1	ATG2_USTMA	A0A0D1DPG6_USTMA
biological_process	GO:0034727	piecemeal microautophagy of the nucleus	2	10	0.2	0.898261	0.32684	1	1	ATG2_USTMA	A0A0D1DPG6_USTMA
biological_process	GO:0061709	reticulophagy	2	6	0.333333	0.981645	0.125475	1	1	ATG2_USTMA	A0A0D1DPG6_USTMA
cellular_component	GO:0005743	mitochondrial inner membrane	2	79	0.0253165	0.000700082	0.999819	0.022	1	A0A0D1CJW5_USTMA	A0A0D1DTF9_USTMA
molecular_function	GO:0031624	ubiquitin conjugating enzyme binding	2	6	0.333333	0.983874	0.115749	1	1	A0A0D1ED14_USTMA	A0A0D1DYN0_USTMA
molecular_function	GO:0008289	lipid binding	2	15	0.133333	0.999872	0.000396123	1	0.074	MDM12_USTMA	MMM1_USTMA
biological_process	GO:0006631	fatty acid metabolic process	2	16	0.125	0.0701276	0.976502	0.999	1	A0A0D1E8D3_USTMA	A0A0D1CRS7_USTMA
cellular_component	GO:0000407	phagophore assembly site	2	9	0.222222	0.929297	0.216015	1	1	ATG2_USTMA	ATG9_USTMA
biological_process	GO:0030242	autophagy of peroxisome	2	5	0.4	0.981645	0.125475	1	1	ATG2_USTMA	A0A0D1CXP7_USTMA
cellular_component	GO:0016459	myosin complex	2	4	0.5	0.996182	0.0534745	1	1	CHS8_USTMA	A0A0D1DWW8_USTMA
molecular_function	GO:0003774	cytoskeletal motor activity	2	2	1	0.915799	0.241781	1	1	CHS8_USTMA	A0A0D1DWW8_USTMA
cellular_component	GO:0031314	extrinsic component of mitochondrial inner membrane	2	8	0.25	0.960778	0.190629	1	1	COQ4_USTMA	A0A0D1C961_USTMA
biological_process	GO:0006744	ubiquinone biosynthetic process	2	10	0.2	0.898261	0.32684	1	1	COQ4_USTMA	A0A0D1C961_USTMA
biological_process	GO:0000447	endonucleolytic cleavage in ITS1 to separate SSU-rRNA from 5.8S rRNA and LSU-rRNA from tricistronic rRNA transcript (SSU-rRNA, 5.8S rRNA, LSU-rRNA)	2	9	0.222222	0.939367	0.244737	1	1	A0A0D1C4X1_USTMA	A0A0D1CQU2_USTMA
cellular_component	GO:0005684	U2-type spliceosomal complex	2	10	0.2	0.742463	0.456612	1	1	CWC26_USTMA	A0A0D1BWX5_USTMA
molecular_function	GO:0004842	ubiquitin-protein transferase activity	2	12	0.166667	0.930542	0.132249	1	1	A0A0D1E4H5_USTMA	A0A0D1CI28_USTMA
cellular_component	GO:0008180	COP9 signalosome	2	7	0.285714	0.973532	0.152777	1	1	A0A0D1E134_USTMA	A0A0D1CWZ4_USTMA
biological_process	GO:0042254	ribosome biogenesis	2	9	0.222222	0.00868219	0.996006	0.616	1	A0A0D1CPZ3_USTMA	A0A0D1CEA6_USTMA
biological_process	GO:0051301	cell division	2	42	0.047619	0.569503	0.588782	1	1	STU1_USTMA	A0A0D1DSI0_USTMA
molecular_function	GO:0050660	flavin adenine dinucleotide binding	2	57	0.0350877	0.00523344	0.999044	0.23	1	DUS3_USTMA	A0A0D1DMF7_USTMA
biological_process	GO:0006506	GPI anchor biosynthetic process	2	19	0.105263	0.555304	0.716022	1	1	A0A0D1E249_USTMA	A0A0D1CKY9_USTMA
biological_process	GO:0035269	protein O-linked mannosylation	2	9	0.222222	0.939367	0.244737	1	1	A0A0D1CFI0_USTMA	A0A0D1DVD8_USTMA
cellular_component	GO:0016282	eukaryotic 43S preinitiation complex	2	15	0.133333	0.811231	0.458079	1	1	EIF3L_USTMA	EIF3E_USTMA
cellular_component	GO:0033290	eukaryotic 48S preinitiation complex	2	15	0.133333	0.811231	0.458079	1	1	EIF3L_USTMA	EIF3E_USTMA
biological_process	GO:0001732	formation of cytoplasmic translation initiation complex	2	15	0.133333	0.793953	0.481181	1	1	EIF3L_USTMA	EIF3E_USTMA
biological_process	GO:0006396	RNA processing	2	9	0.222222	0.11194	0.919449	1	1	A0A0D1CIK4_USTMA	A0A0D1BVX2_USTMA
biological_process	GO:0016236	macroautophagy	2	10	0.2	0.851351	0.280225	1	1	A0A0D1CXP7_USTMA	A0A0D1CI78_USTMA
cellular_component	GO:0005852	eukaryotic translation initiation factor 3 complex	2	10	0.2	0.862533	0.385076	1	1	EIF3L_USTMA	EIF3E_USTMA
biological_process	GO:0006413	translational initiation	2	10	0.2	0.250696	0.906825	1	1	EIF3L_USTMA	EIF3E_USTMA
biological_process	GO:0045292	mRNA cis splicing, via spliceosome	2	10	0.2	0.898261	0.32684	1	1	A0A0D1BY36_USTMA	A0A0D1E3Q8_USTMA
cellular_component	GO:0030688	preribosome, small subunit precursor	2	11	0.181818	0.862533	0.385076	1	1	A0A0D1C4X1_USTMA	A0A0D1CQU2_USTMA
cellular_component	GO:0005881	cytoplasmic microtubule	2	6	0.333333	0.973532	0.152777	1	1	STU1_USTMA	A0A0D1DSG8_USTMA
cellular_component	GO:0070847	core mediator complex	2	5	0.4	0.991172	0.0832386	1	1	MED7_USTMA	A0A0D1DUT0_USTMA
cellular_component	GO:0030015	CCR4-NOT core complex	2	6	0.333333	0.983662	0.116689	1	1	A0A0D1DQ67_USTMA	A0A0D1EA01_USTMA
cellular_component	GO:0097042	extrinsic component of fungal-type vacuolar membrane	2	3	0.666667	0.998968	0.0286462	1	0.998	IML1_USTMA	A0A0D1E8X2_USTMA
cellular_component	GO:1990130	GATOR1 complex	2	3	0.666667	0.998968	0.0286462	1	0.998	IML1_USTMA	A0A0D1E8X2_USTMA
biological_process	GO:0034198	cellular response to amino acid starvation	2	3	0.666667	0.990048	0.0897684	1	1	IML1_USTMA	A0A0D1E8X2_USTMA
biological_process	GO:0032007	negative regulation of TOR signaling	2	5	0.4	0.970365	0.163811	1	1	IML1_USTMA	A0A0D1E8X2_USTMA
cellular_component	GO:0030173	integral component of Golgi membrane	2	18	0.111111	0.698618	0.5876	1	1	A0A0D1DT37_USTMA	A0A0D1CJE8_USTMA
cellular_component	GO:0032865	ERMES complex	2	4	0.5	0.996182	0.0534745	1	1	MDM12_USTMA	MMM1_USTMA
biological_process	GO:1990456	mitochondrion-endoplasmic reticulum membrane tethering	2	4	0.5	0.995681	0.0578419	1	1	MDM12_USTMA	MMM1_USTMA
biological_process	GO:0015914	phospholipid transport	2	6	0.333333	0.998796	0.00805477	1	0.966	MDM12_USTMA	MMM1_USTMA
molecular_function	GO:0008017	microtubule binding	2	24	0.0833333	0.428504	0.805984	1	1	STU1_USTMA	A0A0D1CRW1_USTMA
biological_process	GO:0010468	regulation of gene expression	2	9	0.222222	1	8.5273e-09	1	0	A0A0D1E3Q8_USTMA	A0A0D1DWG5_USTMA
cellular_component	GO:0051286	cell tip	2	7	0.285714	0.997631	0.00991375	1	0.831	A0A0D1CV21_USTMA	A0A0D1E6A7_USTMA
biological_process	GO:0070096	mitochondrial outer membrane translocase complex assembly	2	5	0.4	0.990048	0.0897684	1	1	MDM12_USTMA	MMM1_USTMA
biological_process	GO:0045040	protein insertion into mitochondrial outer membrane	2	7	0.285714	0.970365	0.163811	1	1	MDM12_USTMA	MMM1_USTMA
cellular_component	GO:0010494	cytoplasmic stress granule	2	7	0.285714	0.973532	0.152777	1	1	A0A0D1DSI6_USTMA	A0A0D1DSQ2_USTMA
biological_process	GO:0006623	protein targeting to vacuole	2	15	0.133333	0.674797	0.611931	1	1	A0A0D1CXP7_USTMA	A0A0D1E641_USTMA
biological_process	GO:0006338	chromatin remodeling	2	12	0.166667	0.638737	0.532128	1	1	A0A0D1DSH3_USTMA	A0A0D1BWW9_USTMA
cellular_component	GO:0005802	trans-Golgi network	2	17	0.117647	0.727466	0.557472	1	1	A0A0D1C917_USTMA	A0A0D1E695_USTMA
biological_process	GO:0006914	autophagy	2	8	0.25	0.886883	0.20292	1	1	A0A0D1CQS0_USTMA	A0A0D1C766_USTMA
cellular_component	GO:0071011	precatalytic spliceosome	2	17	0.117647	0.75599	0.525812	1	1	A0A0D1BWX5_USTMA	A0A0D1CKR3_USTMA
molecular_function	GO:0003714	transcription corepressor activity	2	12	0.166667	0.887325	0.344801	1	1	A0A0D1CYH1_USTMA	A0A0D1E4I7_USTMA
molecular_function	GO:0004721	phosphoprotein phosphatase activity	2	9	0.222222	0.930521	0.148942	1	1	TIM50_USTMA	A0A0D1CJN8_USTMA
molecular_function	GO:0060090	molecular adaptor activity	2	9	0.222222	0.875788	0.244647	1	1	A0A0D1DQ67_USTMA	A0A0D1CPV5_USTMA
biological_process	GO:0007030	Golgi organization	2	17	0.117647	0.5266	0.738079	1	1	A0A0D1BWQ9_USTMA	A0A0D1C766_USTMA
cellular_component	GO:0072686	mitotic spindle	2	11	0.181818	0.929297	0.216015	1	1	STU1_USTMA	A0A0D1E266_USTMA
cellular_component	GO:0005876	spindle microtubule	2	6	0.333333	0.994788	0.0392222	1	1	STU1_USTMA	A0A0D1DX71_USTMA
cellular_component	GO:0043332	mating projection tip	2	8	0.25	0.945486	0.229519	1	1	A0A0D1CTU4_USTMA	A0A0D1BZG9_USTMA
cellular_component	GO:0042729	DASH complex	2	9	0.222222	0.945486	0.229519	1	1	A0A0D1DX71_USTMA	A0A0D1CUN2_USTMA
biological_process	GO:0005975	carbohydrate metabolic process	2	55	0.0363636	3.52484e-05	0.999992	0.004	1	A0A0D1DZW9_USTMA	A0A0D1CV72_USTMA
molecular_function	GO:0030145	manganese ion binding	2	8	0.25	0.961257	0.189211	1	1	A0A0D1BXI7_USTMA	A0A0D1CH16_USTMA
molecular_function	GO:0019843	rRNA binding	2	16	0.125	0.360045	0.848048	1	1	A0A0D1EAS0_USTMA	A0A0D1DTL3_USTMA
biological_process	GO:0006406	mRNA export from nucleus	2	13	0.153846	0.898339	0.22462	1	1	A0A0D1DYC5_USTMA	A0A0D1E159_USTMA
biological_process	GO:0031122	cytoplasmic microtubule organization	2	10	0.2	0.919964	0.285913	1	1	A0A0D1BZI3_USTMA	A0A0D1DSG8_USTMA
cellular_component	GO:0000795	synaptonemal complex	2	4	0.5	0.996182	0.0534745	1	1	A0A0D1CF39_USTMA	A0A0D1CRL6_USTMA
biological_process	GO:1990414	replication-born double-strand break repair via sister chromatid exchange	2	3	0.666667	0.998828	0.0310805	1	1	A0A0D1CRL6_USTMA	A0A0D1DWG5_USTMA
biological_process	GO:0071028	nuclear mRNA surveillance	2	9	0.222222	0.919809	0.23509	1	1	A0A0D1C6D7_USTMA	A0A0D1C3A9_USTMA
biological_process	GO:2000815	regulation of mRNA stability involved in response to oxidative stress	2	3	0.666667	0.998828	0.0310805	1	1	A0A0D1C6D7_USTMA	A0A0D1C3A9_USTMA
biological_process	GO:0034427	nuclear-transcribed mRNA catabolic process, exonucleolytic, 3'-5'	2	10	0.2	0.898261	0.32684	1	1	A0A0D1CLK3_USTMA	A0A0D1EAA3_USTMA
cellular_component	GO:0000938	GARP complex	2	4	0.5	0.996182	0.0534745	1	1	A0A0D1DYZ9_USTMA	A0A0D1C9Y1_USTMA
molecular_function	GO:0004197	cysteine-type endopeptidase activity	2	9	0.222222	0.887325	0.344801	1	1	A0A0D1E266_USTMA	A0A0D1EBZ2_USTMA
biological_process	GO:0016579	protein deubiquitination	2	19	0.105263	0.731992	0.501408	1	1	A0A0D1BWR7_USTMA	A0A0D1EBZ2_USTMA
cellular_component	GO:0008024	cyclin/CDK positive transcription elongation factor complex	2	4	0.5	0.991172	0.0832386	1	1	A0A0D1BZG3_USTMA	A0A0D1CL12_USTMA
cellular_component	GO:0042995	cell projection	2	6	0.333333	0.970693	0.101391	1	1	A0A0D1E0D6_USTMA	A0A0D1E0C2_USTMA
biological_process	GO:0007163	establishment or maintenance of cell polarity	2	6	0.333333	0.996373	0.0128175	1	0.999	A0A0D1E0D6_USTMA	A0A0D1DYV9_USTMA
biological_process	GO:0032956	regulation of actin cytoskeleton organization	2	11	0.181818	0.582213	0.651215	1	1	A0A0D1E0D6_USTMA	A0A0D1E6N8_USTMA
molecular_function	GO:0046961	proton-transporting ATPase activity, rotational mechanism	2	13	0.153846	0.863969	0.38276	1	1	A0A0D1DVY9_USTMA	A0A0D1DVI4_USTMA
cellular_component	GO:0000178	exosome (RNase complex)	2	6	0.333333	0.811231	0.458079	1	1	A0A0D1CLK3_USTMA	A0A0D1EAA3_USTMA
biological_process	GO:0000147	actin cortical patch assembly	2	3	0.666667	0.998828	0.0310805	1	1	A0A0D1DTJ9_USTMA	A0A0D1CRA9_USTMA
molecular_function	GO:0140326	ATPase-coupled intramembrane lipid transporter activity	2	4	0.5	0.996234	0.053009	1	1	A0A0D1C917_USTMA	A0A0D1CPW3_USTMA
biological_process	GO:0045332	phospholipid translocation	2	6	0.333333	0.996685	0.0296354	1	1	A0A0D1C917_USTMA	A0A0D1CPW3_USTMA
cellular_component	GO:0005819	spindle	2	7	0.285714	0.979061	0.0576175	1	1	A0A0D1DPJ8_USTMA	A0A0D1DYT4_USTMA
biological_process	GO:0007094	mitotic spindle assembly checkpoint signaling	2	10	0.2	0.919964	0.285913	1	1	A0A0D1DPJ8_USTMA	A0A0D1DQ09_USTMA
cellular_component	GO:0005689	U12-type spliceosomal complex	2	8	0.25	0.960778	0.190629	1	1	A0A0D1BWX5_USTMA	A0A0D1CKR3_USTMA
molecular_function	GO:0030234	enzyme regulator activity	2	12	0.166667	0.980127	0.0375637	1	1	A0A0D1CV21_USTMA	A0A0D1E262_USTMA
cellular_component	GO:0012505	endomembrane system	2	21	0.0952381	0.900486	0.128022	1	1	A0A0D1DXI2_USTMA	A0A0D1DYV8_USTMA
biological_process	GO:0030968	endoplasmic reticulum unfolded protein response	2	10	0.2	0.97784	0.101739	1	1	A0A0D1CA49_USTMA	A0A0D1DQM9_USTMA
biological_process	GO:0006370	7-methylguanosine mRNA capping	2	6	0.333333	0.970365	0.163811	1	1	A0A0D1C7J8_USTMA	A0A0D1DQ99_USTMA
molecular_function	GO:0004029	aldehyde dehydrogenase (NAD+) activity	2	8	0.25	0.961257	0.189211	1	1	A0A0D1DVY7_USTMA	A0A0D1DX65_USTMA
cellular_component	GO:0000935	division septum	2	3	0.666667	0.998968	0.0286462	1	0.998	A0A0D1CTU4_USTMA	A0A0D1DR37_USTMA
cellular_component	GO:0005935	cellular bud neck	2	5	0.4	0.983662	0.116689	1	1	A0A0D1E0D6_USTMA	A0A0D1BZG9_USTMA
cellular_component	GO:0000131	incipient cellular bud site	2	2	1	1	0.010237	1	0.94	A0A0D1E0D6_USTMA	A0A0D1BZG9_USTMA
molecular_function	GO:0019829	ATPase-coupled cation transmembrane transporter activity	2	6	0.333333	0.951929	0.129124	1	1	A0A0D1DXP0_USTMA	A0A0D1CH16_USTMA
biological_process	GO:0030163	protein catabolic process	2	5	0.4	0.869138	0.186316	1	1	A0A0D1DQ65_USTMA	A0A0D1DV77_USTMA
cellular_component	GO:0005615	extracellular space	2	11	0.181818	0.907935	0.308136	1	1	A0A0D1E6M8_USTMA	A0A0D1CI78_USTMA
biological_process	GO:0006405	RNA export from nucleus	2	5	0.4	0.952536	0.110726	1	1	A0A0D1C3H2_USTMA	A0A0D1EAJ6_USTMA
biological_process	GO:0000079	regulation of cyclin-dependent protein serine/threonine kinase activity	2	12	0.166667	0.874525	0.367113	1	1	A0A0D1DQC1_USTMA	A0A0D1DRS0_USTMA
cellular_component	GO:0017119	Golgi transport complex	2	7	0.285714	0.973532	0.152777	1	1	A0A0D1BWQ9_USTMA	A0A0D1C4U4_USTMA
biological_process	GO:0030036	actin cytoskeleton organization	2	10	0.2	0.98356	0.0369384	1	1	A0A0D1BX38_USTMA	A0A0D1BWE6_USTMA
molecular_function	GO:0031956	medium-chain fatty acid-CoA ligase activity	2	9	0.222222	0.946132	0.22788	1	1	A0A0D1E8D3_USTMA	A0A0D1CRS7_USTMA
cellular_component	GO:0000145	exocyst	2	9	0.222222	0.945486	0.229519	1	1	A0A0D1E5C3_USTMA	A0A0D1E3Z5_USTMA
molecular_function	GO:0070403	NAD+ binding	2	9	0.222222	0.946132	0.22788	1	1	A0A0D1CQE5_USTMA	A0A0D1DSY4_USTMA
cellular_component	GO:0044732	mitotic spindle pole body	2	10	0.2	0.907935	0.308136	1	1	A0A0D1CUN2_USTMA	A0A0D1E266_USTMA
biological_process	GO:0000920	septum digestion after cytokinesis	2	3	0.666667	0.995681	0.0578419	1	1	A0A0D1DY39_USTMA	A0A0D1BZG9_USTMA
cellular_component	GO:0030870	Mre11 complex	2	3	0.666667	0.998968	0.0286462	1	0.998	A0A0D1BXI7_USTMA	A0A0D1CDD4_USTMA
biological_process	GO:0007095	mitotic G2 DNA damage checkpoint signaling	2	3	0.666667	0.998828	0.0310805	1	1	A0A0D1BXI7_USTMA	A0A0D1CDD4_USTMA
cellular_component	GO:0070822	Sin3-type complex	2	3	0.666667	0.973532	0.152777	1	1	A0A0D1BWL5_USTMA	A0A0D1E4I7_USTMA
cellular_component	GO:0008541	proteasome regulatory particle, lid subcomplex	2	8	0.25	0.960778	0.190629	1	1	A0A0D1E262_USTMA	A0A0D1DZ94_USTMA
biological_process	GO:0043248	proteasome assembly	2	9	0.222222	0.822086	0.444496	1	1	A0A0D1DZ94_USTMA	A0A0D1CAD8_USTMA
cellular_component	GO:0031201	SNARE complex	2	16	0.125	0.783985	0.492659	1	1	A0A0D1DYV8_USTMA	A0A0D1DTL0_USTMA
biological_process	GO:0046856	phosphatidylinositol dephosphorylation	2	11	0.181818	0.874525	0.367113	1	1	A0A0D1E0C2_USTMA	A0A0D1E449_USTMA
cellular_component	GO:0015630	microtubule cytoskeleton	2	7	0.285714	0.908723	0.161187	1	1	A0A0D1E6A7_USTMA	A0A0D1CPV5_USTMA
biological_process	GO:0034613	cellular protein localization	2	6	0.333333	0.992501	0.012332	1	0.999	A0A0D1E6A7_USTMA	A0A0D1CPV5_USTMA
biological_process	GO:0007010	cytoskeleton organization	2	4	0.5	0.988226	0.0228145	1	1	A0A0D1E474_USTMA	A0A0D1EBL3_USTMA
biological_process	GO:0007018	microtubule-based movement	2	16	0.125	0.731992	0.501408	1	1	A0A0D1E0Z1_USTMA	A0A0D1DSG8_USTMA
biological_process	GO:0006999	nuclear pore organization	2	4	0.5	0.990048	0.0897684	1	1	A0A0D1E1J0_USTMA	A0A0D1CRF0_USTMA
biological_process	GO:0006979	response to oxidative stress	2	9	0.222222	0.837503	0.299316	1	1	A0A0D1D1R0_USTMA	A0A0D1DQN9_USTMA
molecular_function	GO:0042910	xenobiotic transmembrane transporter activity	2	23	0.0869565	0.531226	0.734013	1	1	A0A0D1DV03_USTMA	A0A0D1D1M0_USTMA
biological_process	GO:1990961	xenobiotic detoxification by transmembrane export across the plasma membrane	2	23	0.0869565	0.555304	0.716022	1	1	A0A0D1DV03_USTMA	A0A0D1D1M0_USTMA
biological_process	GO:0042770	signal transduction in response to DNA damage	2	2	1	0.802967	0.415397	1	1	A0A0D1CDD4_USTMA	A0A0D1E136_USTMA
biological_process	GO:0006893	Golgi to plasma membrane transport	2	9	0.222222	0.947859	0.177914	1	1	A0A0D1E5C3_USTMA	A0A0D1E3Z5_USTMA
biological_process	GO:0018107	peptidyl-threonine phosphorylation	2	7	0.285714	0.970365	0.163811	1	1	A0A0D1CRA9_USTMA	A0A0D1E724_USTMA
cellular_component	GO:0044611	nuclear pore inner ring	2	3	0.666667	0.998968	0.0286462	1	0.998	A0A0D1C3H2_USTMA	A0A0D1CRF0_USTMA
biological_process	GO:0036228	protein localization to nuclear inner membrane	2	2	1	1	0.0111415	1	0.999	A0A0D1C3H2_USTMA	A0A0D1E1J0_USTMA
biological_process	GO:0006464	cellular protein modification process	2	5	0.4	0.851527	0.187744	1	1	A0A0D1E2K5_USTMA	A0A0D1DV77_USTMA
cellular_component	GO:0005868	cytoplasmic dynein complex	2	5	0.4	0.991172	0.0832386	1	1	A0A0D1E0Z1_USTMA	A0A0D1DSG8_USTMA
molecular_function	GO:0005262	calcium channel activity	2	6	0.333333	0.983874	0.115749	1	1	A0A0D1C0M4_USTMA	A0A0D1DUR5_USTMA
molecular_function	GO:0005484	SNAP receptor activity	2	14	0.142857	0.839138	0.419743	1	1	A0A0D1DYV8_USTMA	A0A0D1DTL0_USTMA
cellular_component	GO:0012507	ER to Golgi transport vesicle membrane	2	6	0.333333	0.999434	0.00450928	1	0.555	A0A0D1E2T0_USTMA	A0A0D1C766_USTMA
biological_process	GO:0016560	protein import into peroxisome matrix, docking	2	6	0.333333	0.981645	0.125475	1	1	A0A0D1E6M2_USTMA	A0A0D1C6B6_USTMA
biological_process	GO:0030950	establishment or maintenance of actin cytoskeleton polarity	2	3	0.666667	0.998828	0.0310805	1	1	A0A0D1E6A7_USTMA	A0A0D1BZG9_USTMA
molecular_function	GO:0008047	enzyme activator activity	2	5	0.4	0.9969	0.00696885	1	0.825	A0A0D1DWR8_USTMA	A0A0D1DTW3_USTMA
biological_process	GO:0006900	vesicle budding from membrane	2	5	0.4	0.999317	0.00426252	1	0.816	A0A0D1BW71_USTMA	A0A0D1E2P1_USTMA
molecular_function	GO:0005052	peroxisome matrix targeting signal-1 binding	2	2	1	1	0.010141	1	0.992	A0A0D1E6M2_USTMA	A0A0D1C6B6_USTMA
molecular_function	GO:0004169	dolichyl-phosphate-mannose-protein mannosyltransferase activity	2	3	0.666667	0.998982	0.0283873	1	1	A0A0D1CFI0_USTMA	A0A0D1DVD8_USTMA
cellular_component	GO:0016586	RSC-type complex	2	4	0.5	0.996182	0.0534745	1	1	A0A0D1CI18_USTMA	A0A0D1E243_USTMA
molecular_function	GO:0005546	phosphatidylinositol-4,5-bisphosphate binding	2	3	0.666667	0.998982	0.0283873	1	1	A0A0D1E5C3_USTMA	A0A0D1E2P1_USTMA
biological_process	GO:0030026	cellular manganese ion homeostasis	2	3	0.666667	0.998828	0.0310805	1	1	A0A0D1CH16_USTMA	A0A0D1DPR0_USTMA
molecular_function	GO:0016758	hexosyltransferase activity	2	2	1	0.9272	0.147553	1	1	A0A0D1DZW9_USTMA	A0A0D1C7S9_USTMA
cellular_component	GO:0097582	dolichyl-phosphate-mannose-protein mannosyltransferase Pmt1p-Pmt2p dimer complex	2	2	1	1	0.010237	1	0.94	A0A0D1CFI0_USTMA	A0A0D1DVD8_USTMA
biological_process	GO:0007059	chromosome segregation	1	10	0.1	0.867156	0.219742	1	1	A0A0D1DPJ8_USTMA
biological_process	GO:0051382	kinetochore assembly	1	7	0.142857	0.836189	0.54272	1	1	A0A0D1E8Y7_USTMA
cellular_component	GO:0005847	mRNA cleavage and polyadenylation specificity factor complex	1	8	0.125	0.809371	0.574761	1	1	A0A0D1DWQ1_USTMA
molecular_function	GO:0004521	endoribonuclease activity	1	10	0.1	0.531226	0.734013	1	1	A0A0D1E0L4_USTMA
biological_process	GO:0006378	mRNA polyadenylation	1	11	0.0909091	0.632887	0.73876	1	1	A0A0D1DWQ1_USTMA
cellular_component	GO:0000159	protein phosphatase type 2A complex	1	6	0.166667	0.883311	0.47332	1	1	A0A0D1CI23_USTMA
cellular_component	GO:0035861	site of double-strand break	1	12	0.0833333	0.653018	0.722882	1	1	A0A0D1BXI7_USTMA
molecular_function	GO:0000150	DNA strand exchange activity	1	2	0.5	0.989859	0.191486	1	1	A0A0D1E3Q0_USTMA
molecular_function	GO:0003690	double-stranded DNA binding	1	11	0.0909091	1	1.97464e-09	1	0	A0A0D1E3Q0_USTMA
biological_process	GO:0000730	DNA recombinase assembly	1	2	0.5	0.96892	0.284768	1	1	A0A0D1E3Q0_USTMA
biological_process	GO:0036297	interstrand cross-link repair	1	10	0.1	0.632887	0.73876	1	1	MG101_USTMA
biological_process	GO:0006312	mitotic recombination	1	4	0.25	0.67316	0.707789	1	1	A0A0D1E3Q0_USTMA
biological_process	GO:0007131	reciprocal meiotic recombination	1	6	0.166667	0.735213	0.549877	1	1	A0A0D1DX65_USTMA
biological_process	GO:0042148	strand invasion	1	2	0.5	0.96892	0.284768	1	1	A0A0D1E3Q0_USTMA
biological_process	GO:0000723	telomere maintenance	1	9	0.111111	0.61438	0.667244	1	1	A0A0D1BXI7_USTMA
molecular_function	GO:0004386	helicase activity	1	15	0.0666667	0.371035	0.771091	1	1	YUM14_USTMA
cellular_component	GO:0000812	Swr1 complex	1	8	0.125	0.809371	0.574761	1	1	SWR1_USTMA
biological_process	GO:0016458	obsolete gene silencing	1	1	1	0.822086	0.444496	1	1	SWR1_USTMA
biological_process	GO:0043486	histone exchange	1	8	0.125	0.67316	0.707789	1	1	SWR1_USTMA
molecular_function	GO:0003688	DNA replication origin binding	1	17	0.0588235	0.476821	0.83639	1	1	A0A0D1E288_USTMA
biological_process	GO:0000727	double-strand break repair via break-induced replication	1	12	0.0833333	0.632887	0.73876	1	1	A0A0D1E288_USTMA
molecular_function	GO:0008194	UDP-glycosyltransferase activity	1	2	0.5	0.985255	0.0532295	1	1	A0A0D1DZW9_USTMA
molecular_function	GO:0030674	protein-macromolecule adaptor activity	1	8	0.125	0.765213	0.429536	1	1	SLA1_USTMA
cellular_component	GO:0070390	transcription export complex 2	1	4	0.25	0.946526	0.347753	1	1	A0A0D1E159_USTMA
biological_process	GO:0006368	transcription elongation from RNA polymerase II promoter	1	17	0.0588235	0.261921	0.932067	1	1	A0A0D1BZG3_USTMA
cellular_component	GO:0005774	vacuolar membrane	1	14	0.0714286	0.921824	0.141791	1	1	A0A0D1DZE8_USTMA
biological_process	GO:0055085	transmembrane transport	1	47	0.0212766	0.00531455	0.997646	0.432	1	A0A0D1E456_USTMA
biological_process	GO:0030435	sporulation resulting in formation of a cellular spore	1	4	0.25	0.910232	0.428071	1	1	STUA_USTMA
molecular_function	GO:0016740	transferase activity	1	16	0.0625	0.841902	0.192236	1	1	A0A0D1DSY4_USTMA
molecular_function	GO:0052689	carboxylic ester hydrolase activity	1	7	0.142857	0.304162	0.857076	1	1	A0A0D1DTF9_USTMA
cellular_component	GO:0031966	mitochondrial membrane	1	15	0.0666667	0.00593085	0.997513	0.188	1	A0A0D1CJ01_USTMA
molecular_function	GO:0051539	4 iron, 4 sulfur cluster binding	1	34	0.0294118	0.128698	0.973447	1	1	A0A0D1C157_USTMA
biological_process	GO:0009060	aerobic respiration	1	20	0.05	0.0064198	0.999263	0.494	1	A0A0D1DQS9_USTMA
molecular_function	GO:0017070	U6 snRNA binding	1	4	0.25	0.946991	0.346377	1	1	A0A0D1CHJ8_USTMA
cellular_component	GO:0031080	nuclear pore outer ring	1	4	0.25	0.946526	0.347753	1	1	A0A0D1DYC5_USTMA
biological_process	GO:0032968	positive regulation of transcription elongation from RNA polymerase II promoter	1	11	0.0909091	0.632887	0.73876	1	1	A0A0D1BZG3_USTMA
molecular_function	GO:0031177	phosphopantetheine binding	1	9	0.111111	0.77212	0.616102	1	1	A0A0D1E8D3_USTMA
biological_process	GO:0006879	cellular iron ion homeostasis	1	13	0.0769231	0.359577	0.893515	1	1	CLCNX_USTMA
biological_process	GO:0034599	cellular response to oxidative stress	1	27	0.037037	0.371375	0.841755	1	1	A0A0D1DY39_USTMA
biological_process	GO:0000462	maturation of SSU-rRNA from tricistronic rRNA transcript (SSU-rRNA, 5.8S rRNA, LSU-rRNA)	1	27	0.037037	0.462669	0.749304	1	1	A0A0D1EAS0_USTMA
cellular_component	GO:1990304	MUB1-RAD6-UBR2 ubiquitin ligase complex	1	2	0.5	0.989763	0.192338	1	1	A0A0D1DYV9_USTMA
biological_process	GO:0016574	histone ubiquitination	1	4	0.25	0.836189	0.54272	1	1	A0A0D1CI28_USTMA
biological_process	GO:0042138	meiotic DNA double-strand break formation	1	3	0.333333	0.942158	0.36041	1	1	A0A0D1BXI7_USTMA
biological_process	GO:0043161	proteasome-mediated ubiquitin-dependent protein catabolic process	1	51	0.0196078	0.0694103	0.968852	0.999	1	A0A0D1DVT1_USTMA
biological_process	GO:0006366	transcription by RNA polymerase II	1	17	0.0588235	1	1.71779e-07	1	0	A0A0D1CZI1_USTMA
biological_process	GO:0032447	protein urmylation	1	4	0.25	0.942158	0.36041	1	1	CTU1_USTMA
biological_process	GO:0034227	tRNA thio-modification	1	2	0.5	0.874525	0.48859	1	1	CTU1_USTMA
biological_process	GO:0098789	pre-mRNA cleavage required for polyadenylation	1	5	0.2	0.910232	0.428071	1	1	A0A0D1DWQ1_USTMA
molecular_function	GO:0000166	nucleotide binding	1	25	0.04	0.566453	0.486246	1	1	VTS1_USTMA
molecular_function	GO:0030371	translation repressor activity	1	1	1	1	0.100813	1	1	VTS1_USTMA
biological_process	GO:0043488	regulation of mRNA stability	1	2	0.5	0.999737	0.00117492	1	0.512	VTS1_USTMA
biological_process	GO:0000349	generation of catalytic spliceosome for first transesterification step	1	3	0.333333	0.96892	0.284768	1	1	SYF1_USTMA
biological_process	GO:0051321	meiotic cell cycle	1	10	0.1	0.984652	0.0377032	1	1	A0A0D1BZI3_USTMA
biological_process	GO:0002181	cytoplasmic translation	1	24	0.0416667	0.212017	0.899495	1	1	A0A0D1CDB8_USTMA
molecular_function	GO:0031267	small GTPase binding	1	16	0.0625	0.509926	0.817966	1	1	A0A0D1DSP2_USTMA
molecular_function	GO:0000049	tRNA binding	1	25	0.04	0.246115	0.937457	1	1	CTU1_USTMA
cellular_component	GO:0005694	chromosome	1	12	0.0833333	0.916137	0.122133	1	1	A0A0D1DSI0_USTMA
molecular_function	GO:0046975	histone methyltransferase activity (H3-K36 specific)	1	2	0.5	0.989859	0.191486	1	1	SET2_USTMA
molecular_function	GO:0030515	snoRNA binding	1	9	0.111111	0.672346	0.613513	1	1	A0A0D1C4X1_USTMA
biological_process	GO:0034354	'de novo' NAD biosynthetic process from tryptophan	1	5	0.2	0.910232	0.428071	1	1	A0A0D1DQV3_USTMA
biological_process	GO:0043420	anthranilate metabolic process	1	3	0.333333	0.96892	0.284768	1	1	A0A0D1DQV3_USTMA
biological_process	GO:0019805	quinolinate biosynthetic process	1	3	0.333333	0.96892	0.284768	1	1	A0A0D1DQV3_USTMA
biological_process	GO:0042594	response to starvation	1	3	0.333333	0.960968	0.101661	1	1	A0A0D1DPG6_USTMA
cellular_component	GO:0034707	chloride channel complex	1	1	1	1	0.101287	1	1	CLCNX_USTMA
cellular_component	GO:0005769	early endosome	1	8	0.125	0.927807	0.26885	1	1	CLCNX_USTMA
cellular_component	GO:0000324	fungal-type vacuole	1	27	0.037037	0.599872	0.540627	1	1	CLCNX_USTMA
molecular_function	GO:0015299	solute:proton antiporter activity	1	6	0.166667	0.887325	0.344801	1	1	CLCNX_USTMA
molecular_function	GO:0005247	voltage-gated chloride channel activity	1	2	0.5	0.989859	0.191486	1	1	CLCNX_USTMA
biological_process	GO:0006878	cellular copper ion homeostasis	1	9	0.111111	0.755263	0.634433	1	1	CLCNX_USTMA
biological_process	GO:0006821	chloride transport	1	2	0.5	0.942158	0.36041	1	1	CLCNX_USTMA
molecular_function	GO:0042626	ATPase-coupled transmembrane transporter activity	1	38	0.0263158	0.513023	0.65228	1	1	A0A0D1DTV7_USTMA
cellular_component	GO:0000151	ubiquitin ligase complex	1	10	0.1	0.18838	0.92228	1	1	A0A0D1DYN0_USTMA
cellular_component	GO:0030121	AP-1 adaptor complex	1	3	0.333333	0.971354	0.274183	1	1	AP1G1_USTMA
molecular_function	GO:0140312	cargo adaptor activity	1	2	0.5	0.848406	0.524997	1	1	AP1G1_USTMA
molecular_function	GO:0035615	clathrin adaptor activity	1	7	0.142857	0.848406	0.524997	1	1	AP1G1_USTMA
biological_process	GO:0099638	endosome to plasma membrane protein transport	1	2	0.5	0.988859	0.200206	1	1	AP1G1_USTMA
biological_process	GO:0006898	receptor-mediated endocytosis	1	3	0.333333	0.956231	0.203825	1	1	AP1G1_USTMA
molecular_function	GO:0005507	copper ion binding	1	14	0.0714286	0.813077	0.455561	1	1	A0A0D1EBR9_USTMA
cellular_component	GO:0030687	preribosome, large subunit precursor	1	26	0.0384615	0.225206	0.944592	1	1	A0A0D1CEA6_USTMA
biological_process	GO:0016126	sterol biosynthetic process	1	14	0.0714286	0.222173	0.945751	1	1	A0A0D1E3E8_USTMA
molecular_function	GO:0004042	acetyl-CoA:L-glutamate N-acetyltransferase activity	1	3	0.333333	0.971613	0.273035	1	1	A0A0D1CI67_USTMA
biological_process	GO:0006526	arginine biosynthetic process	1	6	0.166667	0.796175	0.591133	1	1	A0A0D1CI67_USTMA
cellular_component	GO:0019898	extrinsic component of membrane	1	7	0.142857	0.962541	0.0981636	1	1	ATG2_USTMA
cellular_component	GO:0005758	mitochondrial intermembrane space	1	23	0.0434783	0.26352	0.931303	1	1	A0A0D1DQS9_USTMA
biological_process	GO:0000480	endonucleolytic cleavage in 5'-ETS of tricistronic rRNA transcript (SSU-rRNA, 5.8S rRNA, LSU-rRNA)	1	5	0.2	0.910232	0.428071	1	1	A0A0D1CQU2_USTMA
biological_process	GO:0000472	endonucleolytic cleavage to generate mature 5'-end of SSU-rRNA from (SSU-rRNA, 5.8S rRNA, LSU-rRNA)	1	5	0.2	0.910232	0.428071	1	1	A0A0D1CQU2_USTMA
cellular_component	GO:0070274	RES complex	1	1	1	1	0.101287	1	1	CWC26_USTMA
biological_process	GO:0006031	chitin biosynthetic process	1	4	0.25	0.836189	0.54272	1	1	CHS1_USTMA
biological_process	GO:0031505	fungal-type cell wall organization	1	27	0.037037	0.394951	0.827546	1	1	A0A0D1CFI0_USTMA
biological_process	GO:0016226	iron-sulfur cluster assembly	1	15	0.0666667	0.418251	0.866706	1	1	A0A0D1C157_USTMA
biological_process	GO:0000245	spliceosomal complex assembly	1	5	0.2	0.796175	0.591133	1	1	CLF1_USTMA
biological_process	GO:0000973	posttranscriptional tethering of RNA polymerase II gene DNA at nuclear periphery	1	4	0.25	0.942158	0.36041	1	1	A0A0D1EAJ6_USTMA
molecular_function	GO:0008237	metallopeptidase activity	1	12	0.0833333	0.357007	0.823508	1	1	A0A0D1E264_USTMA
cellular_component	GO:0071013	catalytic step 2 spliceosome	1	32	0.03125	0.475344	0.739182	1	1	A0A0D1BWX5_USTMA
biological_process	GO:0000266	mitochondrial fission	1	8	0.125	0.796175	0.591133	1	1	A0A0D1DYR5_USTMA
cellular_component	GO:0005654	nucleoplasm	1	17	0.0588235	0.459394	0.64964	1	1	A0A0D1DQY1_USTMA
molecular_function	GO:0017108	5'-flap endonuclease activity	1	9	0.111111	0.77212	0.616102	1	1	A0A0D1DU59_USTMA
biological_process	GO:0043137	DNA replication, removal of RNA primer	1	5	0.2	0.910232	0.428071	1	1	A0A0D1DQ00_USTMA
molecular_function	GO:0004315	3-oxoacyl-[acyl-carrier-protein] synthase activity	1	3	0.333333	0.971613	0.273035	1	1	A0A0D1CLM3_USTMA
molecular_function	GO:0045131	pre-mRNA branch point binding	1	1	1	1	0.100813	1	1	BBP_USTMA
biological_process	GO:0048024	regulation of mRNA splicing, via spliceosome	1	2	0.5	0.990048	0.0897684	1	1	BBP_USTMA
molecular_function	GO:0051015	actin filament binding	1	27	0.037037	0.210188	0.949506	1	1	A0A0D1DWW8_USTMA
cellular_component	GO:0071540	eukaryotic translation initiation factor 3 complex, eIF3e	1	5	0.2	0.916761	0.413882	1	1	EIF3E_USTMA
biological_process	GO:0006696	ergosterol biosynthetic process	1	23	0.0434783	0.283978	0.923984	1	1	A0A0D1E3E8_USTMA
biological_process	GO:0008299	isoprenoid biosynthetic process	1	6	0.166667	0.735213	0.549877	1	1	A0A0D1E3E8_USTMA
cellular_component	GO:0005741	mitochondrial outer membrane	1	12	0.0833333	0.852915	0.313648	1	1	A0A0D1CDM1_USTMA
molecular_function	GO:0051731	polynucleotide 5'-hydroxyl-kinase activity	1	2	0.5	0.971613	0.273035	1	1	A0A0D1CIK4_USTMA
biological_process	GO:0006388	tRNA splicing, via endonucleolytic cleavage and ligation	1	5	0.2	0.939367	0.244737	1	1	A0A0D1CGQ9_USTMA
cellular_component	GO:0005776	autophagosome	1	2	0.5	0.971354	0.274183	1	1	ATG9_USTMA
cellular_component	GO:0031410	cytoplasmic vesicle	1	12	0.0833333	0.999947	0.000128034	1	0.021	A0A0D1E0D6_USTMA
biological_process	GO:0006995	cellular response to nitrogen starvation	1	6	0.166667	0.836189	0.54272	1	1	A0A0D1E8X2_USTMA
biological_process	GO:0034497	protein localization to phagophore assembly site	1	6	0.166667	0.874525	0.48859	1	1	ATG9_USTMA
molecular_function	GO:0034511	U3 snoRNA binding	1	7	0.142857	0.848406	0.524997	1	1	A0A0D1EAS0_USTMA
molecular_function	GO:0016757	glycosyltransferase activity	1	8	0.125	0.852129	0.244597	1	1	A0A0D1E7S4_USTMA
cellular_component	GO:0000922	spindle pole	1	9	0.111111	0.927807	0.26885	1	1	A0A0D1BZI3_USTMA
biological_process	GO:0007097	nuclear migration	1	2	0.5	0.970365	0.163811	1	1	A0A0D1DSG8_USTMA
cellular_component	GO:0030014	CCR4-NOT complex	1	3	0.333333	0.994788	0.0392222	1	1	A0A0D1E4H5_USTMA
molecular_function	GO:0000175	3'-5'-exoribonuclease activity	1	10	0.1	0.655199	0.721128	1	1	A0A0D1EAA3_USTMA
biological_process	GO:0006342	heterochromatin assembly	1	5	0.2	NA	NA	NA	NA	A0A0D1E0F1_USTMA
biological_process	GO:0010506	regulation of autophagy	1	4	0.25	0.939367	0.244737	1	1	IML1_USTMA
biological_process	GO:0007020	microtubule nucleation	1	7	0.142857	0.796175	0.591133	1	1	A0A0D1BZI3_USTMA
molecular_function	GO:0003867	4-aminobutyrate transaminase activity	1	2	0.5	0.989859	0.191486	1	1	GABAT_USTMA
molecular_function	GO:0034386	4-aminobutyrate:2-oxoglutarate transaminase activity	1	1	1	1	0.100813	1	1	GABAT_USTMA
biological_process	GO:0009450	gamma-aminobutyric acid catabolic process	1	3	0.333333	0.96892	0.284768	1	1	GABAT_USTMA
biological_process	GO:0006974	cellular response to DNA damage stimulus	1	12	0.0833333	0.263821	0.81185	1	1	A0A0D1CWR4_USTMA
molecular_function	GO:0017150	tRNA dihydrouridine synthase activity	1	5	0.2	0.917459	0.412336	1	1	DUS3_USTMA
molecular_function	GO:0102265	tRNA-dihydrouridine47 synthase activity	1	1	1	1	0.100813	1	1	DUS3_USTMA
molecular_function	GO:0004016	adenylate cyclase activity	1	1	1	1	0.100813	1	1	CYAA_USTMA
molecular_function	GO:0016791	phosphatase activity	1	15	0.0666667	0.666021	0.464957	1	1	CYAA_USTMA
biological_process	GO:0007188	adenylate cyclase-modulating G protein-coupled receptor signaling pathway	1	2	0.5	0.942158	0.36041	1	1	CYAA_USTMA
biological_process	GO:0006171	cAMP biosynthetic process	1	1	1	1	0.105674	1	1	CYAA_USTMA
biological_process	GO:0009267	cellular response to starvation	1	7	0.142857	0.93218	0.167075	1	1	A0A0D1E914_USTMA
molecular_function	GO:0004707	MAP kinase activity	1	5	0.2	0.917459	0.412336	1	1	A0A0D1BUB7_USTMA
biological_process	GO:0042273	ribosomal large subunit biogenesis	1	17	0.0588235	0.0463527	0.988377	0.997	1	A0A0D1CEA6_USTMA
cellular_component	GO:0031901	early endosome membrane	1	2	0.5	0.989763	0.192338	1	1	SNX3_USTMA
molecular_function	GO:0019706	protein-cysteine S-palmitoyltransferase activity	1	7	0.142857	0.848406	0.524997	1	1	A0A0D1CWA9_USTMA
cellular_component	GO:0002144	cytosolic tRNA wobble base thiouridylase complex	1	1	1	1	0.101287	1	1	CTU1_USTMA
molecular_function	GO:0016779	nucleotidyltransferase activity	1	9	0.111111	0.605948	0.552556	1	1	CTU1_USTMA
biological_process	GO:0002143	tRNA wobble position uridine thiolation	1	5	0.2	0.910232	0.428071	1	1	CTU1_USTMA
cellular_component	GO:0001401	SAM complex	1	3	0.333333	0.971354	0.274183	1	1	A0A0D1E7J5_USTMA
biological_process	GO:0051654	establishment of mitochondrion localization	1	3	0.333333	0.942158	0.36041	1	1	A0A0D1DYR5_USTMA
molecular_function	GO:0010181	FMN binding	1	18	0.0555556	0.445189	0.852953	1	1	A0A0D1DP09_USTMA
cellular_component	GO:0031965	nuclear membrane	1	8	0.125	0.614924	0.751033	1	1	A0A0D1DYC5_USTMA
cellular_component	GO:0017177	glucosidase II complex	1	2	0.5	0.989763	0.192338	1	1	GLU2B_USTMA
biological_process	GO:0006491	N-glycan processing	1	7	0.142857	0.714087	0.673157	1	1	GLU2B_USTMA
biological_process	GO:0072659	protein localization to plasma membrane	1	3	0.333333	0.984641	0.0800355	1	1	A0A0D1E249_USTMA
biological_process	GO:0007186	G protein-coupled receptor signaling pathway	1	8	0.125	0.849038	0.406413	1	1	A0A0D1DTD9_USTMA
molecular_function	GO:0008266	poly(U) RNA binding	1	4	0.25	0.946991	0.346377	1	1	A0A0D1DSI6_USTMA
cellular_component	GO:0005732	sno(s)RNA-containing ribonucleoprotein complex	1	4	0.25	0.4124	0.869155	1	1	A0A0D1CPZ3_USTMA
cellular_component	GO:0046540	U4/U6 x U5 tri-snRNP complex	1	21	0.047619	0.35678	0.894432	1	1	A0A0D1CHJ8_USTMA
molecular_function	GO:0016841	ammonia-lyase activity	1	2	0.5	0.884251	0.471654	1	1	A0A0D1CWV6_USTMA
molecular_function	GO:0031072	heat shock protein binding	1	10	0.1	0.643526	0.64057	1	1	A0A0D1DRE3_USTMA
molecular_function	GO:0044183	protein folding chaperone	1	7	0.142857	0.848406	0.524997	1	1	A0A0D1C5F5_USTMA
biological_process	GO:0016192	vesicle-mediated transport	1	29	0.0344828	0.994214	0.010076	1	0.988	A0A0D1DT37_USTMA
molecular_function	GO:0004311	farnesyltranstransferase activity	1	2	0.5	0.971613	0.273035	1	1	A0A0D1CJ01_USTMA
molecular_function	GO:0030983	mismatched DNA binding	1	9	0.111111	0.732991	0.65489	1	1	A0A0D1CF39_USTMA
biological_process	GO:0006298	mismatch repair	1	14	0.0714286	0.76491	0.516337	1	1	A0A0D1DQ00_USTMA
biological_process	GO:0018230	peptidyl-L-cysteine S-palmitoylation	1	7	0.142857	0.836189	0.54272	1	1	A0A0D1CWA9_USTMA
cellular_component	GO:0033565	ESCRT-0 complex	1	1	1	1	0.101287	1	1	HSE1_USTMA
biological_process	GO:0030150	protein import into mitochondrial matrix	1	14	0.0714286	0.555504	0.791221	1	1	TIM50_USTMA
molecular_function	GO:0032452	histone demethylase activity	1	4	0.25	0.946991	0.346377	1	1	A0A0D1BWW9_USTMA
molecular_function	GO:0051864	histone H3-methyl-lysine-36 demethylase activity	1	2	0.5	0.989859	0.191486	1	1	A0A0D1BWW9_USTMA
biological_process	GO:0016042	lipid catabolic process	1	10	0.1	0.0426435	0.989465	0.991	1	A0A0D1D0E6_USTMA
cellular_component	GO:0000262	mitochondrial chromosome	1	1	1	1	0.101287	1	1	MG101_USTMA
cellular_component	GO:0042645	mitochondrial nucleoid	1	8	0.125	0.809371	0.574761	1	1	MG101_USTMA
biological_process	GO:0000725	recombinational repair	1	3	0.333333	0.939382	0.127793	1	1	MG101_USTMA
cellular_component	GO:0017053	transcription repressor complex	1	6	0.166667	0.809371	0.574761	1	1	A0A0D1CR21_USTMA
molecular_function	GO:0003917	DNA topoisomerase type I (single strand cut, ATP-independent) activity	1	2	0.5	0.989859	0.191486	1	1	A0A0D1C790_USTMA
biological_process	GO:0006265	DNA topological change	1	3	0.333333	0.96892	0.284768	1	1	A0A0D1C790_USTMA
molecular_function	GO:0008168	methyltransferase activity	1	19	0.0526316	0.0227675	0.992594	0.764	1	A0A0D1DTQ7_USTMA
biological_process	GO:0006895	Golgi to endosome transport	1	8	0.125	0.796175	0.591133	1	1	A0A0D1E695_USTMA
molecular_function	GO:0030621	U4 snRNA binding	1	2	0.5	0.989859	0.191486	1	1	A0A0D1CHJ8_USTMA
biological_process	GO:0001510	RNA methylation	1	7	0.142857	0.394951	0.827546	1	1	A0A0D1DTQ7_USTMA
cellular_component	GO:0030904	retromer complex	1	4	0.25	0.916761	0.413882	1	1	SNX3_USTMA
biological_process	GO:0032456	endocytic recycling	1	5	0.2	0.970365	0.163811	1	1	SNX3_USTMA
biological_process	GO:0034499	late endosome to Golgi transport	1	1	1	1	0.105674	1	1	SNX3_USTMA
cellular_component	GO:0005744	TIM23 mitochondrial import inner membrane translocase complex	1	6	0.166667	0.770481	0.617916	1	1	TIM50_USTMA
cellular_component	GO:0005669	transcription factor TFIID complex	1	13	0.0769231	0.614924	0.751033	1	1	A0A0D1C8N6_USTMA
biological_process	GO:0070816	phosphorylation of RNA polymerase II C-terminal domain	1	11	0.0909091	0.593587	0.766455	1	1	A0A0D1BZG3_USTMA
biological_process	GO:0006367	transcription initiation from RNA polymerase II promoter	1	15	0.0666667	0.533164	0.693407	1	1	A0A0D1CRA1_USTMA
biological_process	GO:0009408	response to heat	1	6	0.166667	0.714087	0.673157	1	1	A0A0D1DZE7_USTMA
cellular_component	GO:0030134	COPII-coated ER to Golgi transport vesicle	1	14	0.0714286	0.987585	0.0415378	1	1	A0A0D1CJE8_USTMA
biological_process	GO:0048315	conidium formation	1	1	1	1	0.105674	1	1	STUA_USTMA
cellular_component	GO:0005815	microtubule organizing center	1	5	0.2	0.800336	0.385624	1	1	STU1_USTMA
cellular_component	GO:1990023	mitotic spindle midzone	1	6	0.166667	0.883311	0.47332	1	1	STU1_USTMA
biological_process	GO:0090307	mitotic spindle assembly	1	6	0.166667	0.796175	0.591133	1	1	STU1_USTMA
biological_process	GO:0070863	positive regulation of protein exit from endoplasmic reticulum	1	2	0.5	0.988859	0.200206	1	1	A0A0D1C766_USTMA
cellular_component	GO:0005761	mitochondrial ribosome	1	1	1	0.12172	0.962691	1	1	RT03_USTMA
biological_process	GO:0006538	glutamate catabolic process	1	2	0.5	0.96892	0.284768	1	1	A0A0D1DTH0_USTMA
biological_process	GO:0008608	attachment of spindle microtubules to kinetochore	1	7	0.142857	0.93462	0.206047	1	1	A0A0D1DX71_USTMA
molecular_function	GO:0005094	Rho GDP-dissociation inhibitor activity	1	3	0.333333	0.971613	0.273035	1	1	A0A0D1BUD7_USTMA
biological_process	GO:0071712	ER-associated misfolded protein catabolic process	1	6	0.166667	0.874525	0.48859	1	1	A0A0D1DVD8_USTMA
molecular_function	GO:0030246	carbohydrate binding	1	11	0.0909091	0.309823	0.913802	1	1	A0A0D1CKY1_USTMA
biological_process	GO:0006629	lipid metabolic process	1	30	0.0333333	0.00344613	0.998337	0.3	1	A0A0D1DTN0_USTMA
biological_process	GO:0006749	glutathione metabolic process	1	19	0.0526316	0.222173	0.945751	1	1	A0A0D1DZ67_USTMA
cellular_component	GO:0000923	equatorial microtubule organizing center	1	5	0.2	0.916761	0.413882	1	1	A0A0D1BZI3_USTMA
cellular_component	GO:0000930	gamma-tubulin complex	1	6	0.166667	0.847223	0.526744	1	1	A0A0D1BZI3_USTMA
molecular_function	GO:0043015	gamma-tubulin binding	1	5	0.2	0.917459	0.412336	1	1	A0A0D1BZI3_USTMA
biological_process	GO:0051225	spindle assembly	1	6	0.166667	0.822086	0.444496	1	1	A0A0D1BZI3_USTMA
molecular_function	GO:0051087	chaperone binding	1	16	0.0625	0.509926	0.817966	1	1	A0A0D1DRE3_USTMA
cellular_component	GO:0031224	intrinsic component of membrane	1	18	0.0555556	8.50808e-05	0.999947	0.001	1	A0A0D1CS33_USTMA
cellular_component	GO:0009986	cell surface	1	12	0.0833333	0.653018	0.722882	1	1	A0A0D1CZV5_USTMA
molecular_function	GO:0008422	beta-glucosidase activity	1	13	0.0769231	0.544439	0.797473	1	1	A0A0D1CZV5_USTMA
biological_process	GO:0006073	cellular glucan metabolic process	1	8	0.125	0.132965	0.972395	1	1	A0A0D1CZV5_USTMA
biological_process	GO:0009251	glucan catabolic process	1	15	0.0666667	0.332756	0.904828	1	1	A0A0D1CZV5_USTMA
cellular_component	GO:0016272	prefoldin complex	1	6	0.166667	0.883311	0.47332	1	1	A0A0D1C5F5_USTMA
molecular_function	GO:0032216	glucosaminyl-phosphatidylinositol O-acyltransferase activity	1	1	1	1	0.100813	1	1	A0A0D1E249_USTMA
cellular_component	GO:0034991	nuclear meiotic cohesin complex	1	2	0.5	0.989763	0.192338	1	1	A0A0D1CRL6_USTMA
cellular_component	GO:0034990	nuclear mitotic cohesin complex	1	2	0.5	0.989763	0.192338	1	1	A0A0D1CRL6_USTMA
biological_process	GO:0007064	mitotic sister chromatid cohesion	1	6	0.166667	0.956231	0.203825	1	1	A0A0D1CRL6_USTMA
biological_process	GO:0007130	synaptonemal complex assembly	1	3	0.333333	0.96892	0.284768	1	1	A0A0D1CRL6_USTMA
molecular_function	GO:0015140	malate transmembrane transporter activity	1	3	0.333333	0.971613	0.273035	1	1	A0A0D1BYV2_USTMA
biological_process	GO:0051666	actin cortical patch localization	1	8	0.125	0.796175	0.591133	1	1	A0A0D1E233_USTMA
biological_process	GO:0030154	cell differentiation	1	3	0.333333	0.919964	0.285913	1	1	A0A0D1BUZ6_USTMA
molecular_function	GO:0003684	damaged DNA binding	1	21	0.047619	0.287206	0.922541	1	1	A0A0D1CDD4_USTMA
molecular_function	GO:0000014	single-stranded DNA endodeoxyribonuclease activity	1	3	0.333333	0.971613	0.273035	1	1	A0A0D1BXI7_USTMA
biological_process	GO:0006296	nucleotide-excision repair, DNA incision, 5'-to lesion	1	3	0.333333	0.96892	0.284768	1	1	A0A0D1DYV1_USTMA
biological_process	GO:0000712	resolution of meiotic recombination intermediates	1	8	0.125	0.796175	0.591133	1	1	A0A0D1CF39_USTMA
biological_process	GO:0050821	protein stabilization	1	7	0.142857	0.836189	0.54272	1	1	A0A0D1DRE3_USTMA
molecular_function	GO:0008080	N-acetyltransferase activity	1	14	0.0714286	0.339003	0.860116	1	1	A0A0D1E6Q6_USTMA
cellular_component	GO:0000177	cytoplasmic exosome (RNase complex)	1	9	0.111111	0.73115	0.656701	1	1	A0A0D1CLK3_USTMA
cellular_component	GO:0000176	nuclear exosome (RNase complex)	1	11	0.0909091	0.691864	0.691557	1	1	A0A0D1CLK3_USTMA
biological_process	GO:0043928	exonucleolytic catabolism of deadenylated mRNA	1	6	0.166667	0.874525	0.48859	1	1	A0A0D1CLK3_USTMA
biological_process	GO:0000467	exonucleolytic trimming to generate mature 3'-end of 5.8S rRNA from tricistronic rRNA transcript (SSU-rRNA, 5.8S rRNA, LSU-rRNA)	1	8	0.125	0.796175	0.591133	1	1	A0A0D1CLK3_USTMA
biological_process	GO:0071035	nuclear polyadenylation-dependent rRNA catabolic process	1	6	0.166667	0.874525	0.48859	1	1	A0A0D1CLK3_USTMA
biological_process	GO:0071038	nuclear polyadenylation-dependent tRNA catabolic process	1	6	0.166667	0.874525	0.48859	1	1	A0A0D1CLK3_USTMA
biological_process	GO:0034475	U4 snRNA 3'-end processing	1	9	0.111111	0.755263	0.634433	1	1	A0A0D1CLK3_USTMA
molecular_function	GO:0016765	transferase activity, transferring alkyl or aryl (other than methyl) groups	1	5	0.2	0.263817	0.900107	1	1	A0A0D1DQG5_USTMA
biological_process	GO:0009272	fungal-type cell wall biogenesis	1	6	0.166667	0.849038	0.406413	1	1	A0A0D1DRE2_USTMA
biological_process	GO:0006654	phosphatidic acid biosynthetic process	1	7	0.142857	0.836189	0.54272	1	1	A0A0D1DTF9_USTMA
cellular_component	GO:0005763	mitochondrial small ribosomal subunit	1	18	0.0555556	0.442528	0.854336	1	1	A0A0D1DTL3_USTMA
molecular_function	GO:0008139	nuclear localization sequence binding	1	6	0.166667	0.884251	0.471654	1	1	A0A0D1CZ47_USTMA
cellular_component	GO:0030126	COPI vesicle coat	1	7	0.142857	0.847223	0.526744	1	1	A0A0D1DTQ6_USTMA
molecular_function	GO:0015171	amino acid transmembrane transporter activity	1	18	0.0555556	0.164958	0.963379	1	1	A0A0D1DZE8_USTMA
biological_process	GO:0003333	amino acid transmembrane transport	1	17	0.0588235	0.241341	0.939292	1	1	A0A0D1DZE8_USTMA
molecular_function	GO:0030332	cyclin binding	1	5	0.2	0.917459	0.412336	1	1	A0A0D1BZG3_USTMA
biological_process	GO:0030865	cortical cytoskeleton organization	1	5	0.2	0.965544	0.114234	1	1	A0A0D1E0D6_USTMA
biological_process	GO:0008360	regulation of cell shape	1	5	0.2	0.874525	0.367113	1	1	A0A0D1E0D6_USTMA
cellular_component	GO:0005811	lipid droplet	1	11	0.0909091	0.691864	0.691557	1	1	A0A0D1DXN0_USTMA
biological_process	GO:0006817	phosphate ion transport	1	3	0.333333	0.796175	0.591133	1	1	A0A0D1C1B9_USTMA
cellular_component	GO:0016471	vacuolar proton-transporting V-type ATPase complex	1	4	0.25	0.997169	0.0264684	1	0.995	A0A0D1DTV7_USTMA
molecular_function	GO:0003691	double-stranded telomeric DNA binding	1	2	0.5	0.989859	0.191486	1	1	A0A0D1CTG7_USTMA
biological_process	GO:0031146	SCF-dependent proteasomal ubiquitin-dependent protein catabolic process	1	11	0.0909091	0.67316	0.707789	1	1	A0A0D1ED76_USTMA
cellular_component	GO:0005844	polysome	1	9	0.111111	0.614924	0.751033	1	1	A0A0D1DXB8_USTMA
biological_process	GO:0042274	ribosomal small subunit biogenesis	1	7	0.142857	0.1677	0.924554	1	1	A0A0D1DQJ5_USTMA
molecular_function	GO:0003919	FMN adenylyltransferase activity	1	1	1	1	0.100813	1	1	A0A0D1DUE6_USTMA
biological_process	GO:0006747	FAD biosynthetic process	1	1	1	1	0.105674	1	1	A0A0D1DUE6_USTMA
molecular_function	GO:0030276	clathrin binding	1	5	0.2	0.943382	0.186923	1	1	A0A0D1DY37_USTMA
molecular_function	GO:0004190	aspartic-type endopeptidase activity	1	11	0.0909091	0.655199	0.721128	1	1	A0A0D1CNC6_USTMA
molecular_function	GO:0016831	carboxy-lyase activity	1	7	0.142857	0.824969	0.385123	1	1	A0A0D1CG70_USTMA
biological_process	GO:0006520	cellular amino acid metabolic process	1	2	0.5	0.00754292	0.996908	0.558	1	A0A0D1CG70_USTMA
biological_process	GO:0090630	activation of GTPase activity	1	12	0.0833333	0.632887	0.73876	1	1	A0A0D1C9U0_USTMA
biological_process	GO:0000056	ribosomal small subunit export from nucleus	1	4	0.25	0.942158	0.36041	1	1	A0A0D1CQU2_USTMA
molecular_function	GO:0004712	protein serine/threonine/tyrosine kinase activity	1	3	0.333333	0.884251	0.471654	1	1	A0A0D1DPJ8_USTMA
biological_process	GO:0051304	chromosome separation	1	1	1	0.850649	0.317571	1	1	A0A0D1DPJ8_USTMA
biological_process	GO:0033316	meiotic spindle assembly checkpoint signaling	1	1	1	1	0.105674	1	1	A0A0D1DPJ8_USTMA
biological_process	GO:0034501	protein localization to kinetochore	1	4	0.25	0.942158	0.36041	1	1	A0A0D1DPJ8_USTMA
biological_process	GO:0007031	peroxisome organization	1	5	0.2	0.731992	0.501408	1	1	A0A0D1DZH3_USTMA
molecular_function	GO:0019888	protein phosphatase regulator activity	1	7	0.142857	0.839138	0.419743	1	1	A0A0D1CI23_USTMA
biological_process	GO:0006826	iron ion transport	1	6	0.166667	0.555504	0.791221	1	1	A0A0D1DPR0_USTMA
biological_process	GO:0046854	phosphatidylinositol phosphate biosynthetic process	1	9	0.111111	0.755263	0.634433	1	1	A0A0D1DMX3_USTMA
biological_process	GO:0031204	posttranslational protein targeting to membrane, translocation	1	6	0.166667	0.836189	0.54272	1	1	A0A0D1CQF3_USTMA
biological_process	GO:0051315	attachment of mitotic spindle microtubules to kinetochore	1	5	0.2	0.956231	0.203825	1	1	A0A0D1E8Y7_USTMA
cellular_component	GO:0042555	MCM complex	1	6	0.166667	0.883311	0.47332	1	1	A0A0D1E288_USTMA
biological_process	GO:0006268	DNA unwinding involved in DNA replication	1	8	0.125	0.796175	0.591133	1	1	A0A0D1E288_USTMA
biological_process	GO:0006267	pre-replicative complex assembly involved in nuclear cell cycle DNA replication	1	7	0.142857	0.836189	0.54272	1	1	A0A0D1E288_USTMA
cellular_component	GO:0035361	Cul8-RING ubiquitin ligase complex	1	2	0.5	0.989763	0.192338	1	1	A0A0D1C943_USTMA
biological_process	GO:0033962	P-body assembly	1	6	0.166667	0.836189	0.54272	1	1	A0A0D1DW69_USTMA
biological_process	GO:0055088	lipid homeostasis	1	12	0.0833333	0.593587	0.766455	1	1	A0A0D1DTF9_USTMA
cellular_component	GO:0033588	elongator holoenzyme complex	1	7	0.142857	0.847223	0.526744	1	1	A0A0D1BUB7_USTMA
biological_process	GO:0072583	clathrin-dependent endocytosis	1	6	0.166667	0.874525	0.48859	1	1	A0A0D1E2P1_USTMA
cellular_component	GO:0032299	ribonuclease H2 complex	1	3	0.333333	0.971354	0.274183	1	1	A0A0D1DQ00_USTMA
molecular_function	GO:0004523	RNA-DNA hybrid ribonuclease activity	1	5	0.2	0.917459	0.412336	1	1	A0A0D1DQ00_USTMA
molecular_function	GO:0019887	protein kinase regulator activity	1	5	0.2	0.802984	0.382144	1	1	A0A0D1E669_USTMA
biological_process	GO:0045893	positive regulation of transcription, DNA-templated	1	6	0.166667	0.990713	0.0205272	1	1	A0A0D1DYC5_USTMA
biological_process	GO:1902975	mitotic DNA replication initiation	1	5	0.2	0.874525	0.48859	1	1	A0A0D1E288_USTMA
cellular_component	GO:0005788	endoplasmic reticulum lumen	1	5	0.2	0.916761	0.413882	1	1	A0A0D1CKY1_USTMA
biological_process	GO:0036498	IRE1-mediated unfolded protein response	1	2	0.5	0.988859	0.200206	1	1	A0A0D1E0L4_USTMA
cellular_component	GO:0015935	small ribosomal subunit	1	11	0.0909091	0.0259354	0.996264	0.657	1	A0A0D1DTL3_USTMA
biological_process	GO:0000055	ribosomal large subunit export from nucleus	1	6	0.166667	0.874525	0.48859	1	1	A0A0D1CEA6_USTMA
molecular_function	GO:0016301	kinase activity	1	13	0.0769231	0.999987	3.23956e-05	1	0.006	A0A0D1C961_USTMA
molecular_function	GO:0004623	phospholipase A2 activity	1	3	0.333333	0.971613	0.273035	1	1	A0A0D1DTF9_USTMA
biological_process	GO:0006633	fatty acid biosynthetic process	1	8	0.125	0.388069	0.88086	1	1	A0A0D1CLM3_USTMA
biological_process	GO:0045930	negative regulation of mitotic cell cycle	1	1	1	0.989554	0.0331128	1	1	A0A0D1CRI1_USTMA
biological_process	GO:0000001	mitochondrion inheritance	1	8	0.125	0.796175	0.591133	1	1	A0A0D1CJW5_USTMA
biological_process	GO:1902600	proton transmembrane transport	1	8	0.125	0.121763	0.975337	1	1	A0A0D1DTV7_USTMA
cellular_component	GO:0005845	mRNA cap binding complex	1	3	0.333333	0.971354	0.274183	1	1	A0A0D1C7J8_USTMA
molecular_function	GO:0004482	mRNA (guanine-N7-)-methyltransferase activity	1	2	0.5	0.989859	0.191486	1	1	A0A0D1C7J8_USTMA
molecular_function	GO:0010436	carotenoid dioxygenase activity	1	2	0.5	0.989859	0.191486	1	1	A0A0D1E6L2_USTMA
biological_process	GO:0016121	carotene catabolic process	1	2	0.5	0.988859	0.200206	1	1	A0A0D1E6L2_USTMA
biological_process	GO:0000022	mitotic spindle elongation	1	2	0.5	0.942158	0.36041	1	1	A0A0D1DT37_USTMA
biological_process	GO:0031936	obsolete negative regulation of chromatin silencing	1	3	0.333333	0.910232	0.428071	1	1	A0A0D1C149_USTMA
molecular_function	GO:0015631	tubulin binding	1	5	0.2	0.60153	0.604593	1	1	A0A0D1DYR5_USTMA
biological_process	GO:0031106	septin ring organization	1	1	1	0.96892	0.284768	1	1	A0A0D1CTU4_USTMA
cellular_component	GO:0008623	CHRAC	1	2	0.5	0.989763	0.192338	1	1	Q4P042_USTMA
biological_process	GO:0010508	positive regulation of autophagy	1	2	0.5	0.942158	0.36041	1	1	A0A0D1E8X2_USTMA
cellular_component	GO:0005665	RNA polymerase II, core complex	1	12	0.0833333	0.653018	0.722882	1	1	A0A0D1C3I0_USTMA
molecular_function	GO:0001055	RNA polymerase II activity	1	5	0.2	0.917459	0.412336	1	1	A0A0D1C3I0_USTMA
molecular_function	GO:0003968	RNA-directed 5'-3' RNA polymerase activity	1	5	0.2	0.917459	0.412336	1	1	A0A0D1C3I0_USTMA
biological_process	GO:0019985	translesion synthesis	1	3	0.333333	0.755263	0.634433	1	1	A0A0D1C3I0_USTMA
biological_process	GO:0030011	maintenance of cell polarity	1	4	0.25	0.942158	0.36041	1	1	A0A0D1E0D6_USTMA
biological_process	GO:0090338	positive regulation of formin-nucleated actin cable assembly	1	1	1	1	0.105674	1	1	A0A0D1E0D6_USTMA
biological_process	GO:0071034	CUT catabolic process	1	2	0.5	0.96892	0.284768	1	1	A0A0D1CLK3_USTMA
biological_process	GO:0071049	nuclear mRNA surveillance	1	2	0.5	NA	NA	NA	NA	A0A0D1CLK3_USTMA
biological_process	GO:0071051	polyadenylation-dependent snoRNA 3'-end processing	1	6	0.166667	0.874525	0.48859	1	1	A0A0D1CLK3_USTMA
cellular_component	GO:0071627	integral component of fungal-type vacuolar membrane	1	9	0.111111	0.770481	0.617916	1	1	A0A0D1DXP0_USTMA
molecular_function	GO:0005388	P-type calcium transporter activity	1	5	0.2	0.917459	0.412336	1	1	A0A0D1DXP0_USTMA
cellular_component	GO:0000783	nuclear telomere cap complex	1	1	1	1	0.101287	1	1	A0A0D1CUA9_USTMA
molecular_function	GO:0098505	G-rich strand telomeric DNA binding	1	1	1	1	0.100813	1	1	A0A0D1CUA9_USTMA
molecular_function	GO:0010521	telomerase inhibitor activity	1	1	1	1	0.100813	1	1	A0A0D1CUA9_USTMA
biological_process	GO:0051974	negative regulation of telomerase activity	1	1	1	1	0.105674	1	1	A0A0D1CUA9_USTMA
biological_process	GO:0032210	regulation of telomere maintenance via telomerase	1	2	0.5	0.96892	0.284768	1	1	A0A0D1CUA9_USTMA
biological_process	GO:0016233	telomere capping	1	1	1	0.96892	0.284768	1	1	A0A0D1CUA9_USTMA
cellular_component	GO:0071513	phosphopantothenoylcysteine decarboxylase complex	1	1	1	1	0.101287	1	1	A0A0D1DP09_USTMA
molecular_function	GO:0004633	phosphopantothenoylcysteine decarboxylase activity	1	1	1	1	0.100813	1	1	A0A0D1DP09_USTMA
biological_process	GO:0015937	coenzyme A biosynthetic process	1	4	0.25	0.942158	0.36041	1	1	A0A0D1DP09_USTMA
molecular_function	GO:0017025	TBP-class protein binding	1	11	0.0909091	0.693886	0.689768	1	1	A0A0D1C8N6_USTMA
biological_process	GO:0045899	positive regulation of RNA polymerase II transcription preinitiation complex assembly	1	7	0.142857	0.836189	0.54272	1	1	A0A0D1EAA7_USTMA
biological_process	GO:0006310	DNA recombination	1	14	0.0714286	0.796702	0.310092	1	1	A0A0D1C3F5_USTMA
biological_process	GO:0006303	double-strand break repair via nonhomologous end joining	1	8	0.125	0.714087	0.673157	1	1	A0A0D1BXI7_USTMA
biological_process	GO:0032012	regulation of ARF protein signal transduction	1	5	0.2	0.910232	0.428071	1	1	A0A0D1DUS2_USTMA
molecular_function	GO:0004181	metallocarboxypeptidase activity	1	2	0.5	0.989859	0.191486	1	1	A0A0D1E6M8_USTMA
biological_process	GO:0000972	transcription-dependent tethering of RNA polymerase II gene DNA at nuclear periphery	1	3	0.333333	0.970365	0.163811	1	1	A0A0D1C3H2_USTMA
molecular_function	GO:0008483	transaminase activity	1	4	0.25	0.701183	0.584927	1	1	A0A0D1DSN7_USTMA
cellular_component	GO:0005801	cis-Golgi network	1	7	0.142857	0.809371	0.574761	1	1	A0A0D1BWQ9_USTMA
cellular_component	GO:0036396	RNA N6-methyladenosine methyltransferase complex	1	2	0.5	0.989763	0.192338	1	1	A0A0D1E120_USTMA
biological_process	GO:0080009	mRNA methylation	1	1	1	1	0.105674	1	1	A0A0D1E120_USTMA
cellular_component	GO:0031207	Sec62/Sec63 complex	1	2	0.5	0.989763	0.192338	1	1	A0A0D1CQF3_USTMA
biological_process	GO:0006614	SRP-dependent cotranslational protein targeting to membrane	1	5	0.2	0.755263	0.634433	1	1	A0A0D1CDU8_USTMA
biological_process	GO:0000272	polysaccharide catabolic process	1	15	0.0666667	0.140926	0.955359	1	1	A0A0D1DRZ0_USTMA
cellular_component	GO:0000814	ESCRT II complex	1	3	0.333333	0.971354	0.274183	1	1	A0A0D1CR50_USTMA
molecular_function	GO:0003906	DNA-(apurinic or apyrimidinic site) endonuclease activity	1	4	0.25	0.917459	0.412336	1	1	A0A0D1DYV1_USTMA
molecular_function	GO:0003899	DNA-directed 5'-3' RNA polymerase activity	1	17	0.0588235	0.428504	0.805984	1	1	A0A0D1E254_USTMA
molecular_function	GO:0000309	nicotinamide-nucleotide adenylyltransferase activity	1	2	0.5	0.989859	0.191486	1	1	A0A0D1CSJ5_USTMA
molecular_function	GO:0004515	nicotinate-nucleotide adenylyltransferase activity	1	1	1	1	0.100813	1	1	A0A0D1CSJ5_USTMA
biological_process	GO:0009435	NAD biosynthetic process	1	3	0.333333	0.96947	0.125475	1	1	A0A0D1CSJ5_USTMA
biological_process	GO:0032508	DNA duplex unwinding	1	7	0.142857	0.849038	0.406413	1	1	A0A0D1CDD4_USTMA
cellular_component	GO:0000228	nuclear chromosome	1	5	0.2	0.426436	0.726755	1	1	A0A0D1DSH3_USTMA
biological_process	GO:0030259	lipid glycosylation	1	2	0.5	0.988859	0.200206	1	1	A0A0D1DZW9_USTMA
molecular_function	GO:0016208	AMP binding	1	5	0.2	0.917459	0.412336	1	1	A0A0D1E669_USTMA
molecular_function	GO:0003951	NAD+ kinase activity	1	4	0.25	0.946991	0.346377	1	1	A0A0D1DUK4_USTMA
biological_process	GO:0019674	NAD metabolic process	1	2	0.5	0.910232	0.428071	1	1	A0A0D1DUK4_USTMA
biological_process	GO:0006741	NADP biosynthetic process	1	2	0.5	0.988859	0.200206	1	1	A0A0D1DUK4_USTMA
molecular_function	GO:0019003	GDP binding	1	5	0.2	0.917459	0.412336	1	1	A0A0D1DSQ2_USTMA
biological_process	GO:0032981	mitochondrial respiratory chain complex I assembly	1	14	0.0714286	0.555504	0.791221	1	1	A0A0D1C157_USTMA
biological_process	GO:0032511	late endosome to vacuole transport via multivesicular body sorting pathway	1	8	0.125	0.965544	0.114234	1	1	A0A0D1BW71_USTMA
cellular_component	GO:0044613	nuclear pore central transport channel	1	4	0.25	0.946526	0.347753	1	1	A0A0D1E1J0_USTMA
cellular_component	GO:0000118	histone deacetylase complex	1	7	0.142857	0.84334	0.359319	1	1	A0A0D1E4I7_USTMA
molecular_function	GO:0005519	cytoskeletal regulatory protein binding	1	1	1	1	0.100813	1	1	A0A0D1CV21_USTMA
biological_process	GO:0051125	regulation of actin nucleation	1	1	1	0.910232	0.428071	1	1	A0A0D1CV21_USTMA
molecular_function	GO:0004829	threonine-tRNA ligase activity	1	2	0.5	0.989859	0.191486	1	1	A0A0D1DSD8_USTMA
biological_process	GO:0006435	threonyl-tRNA aminoacylation	1	2	0.5	0.988859	0.200206	1	1	A0A0D1DSD8_USTMA
molecular_function	GO:0016829	lyase activity	1	6	0.166667	0.327234	0.7847	1	1	A0A0D1DRZ0_USTMA
biological_process	GO:0000433	carbon catabolite repression of transcription from RNA polymerase II promoter by glucose	1	3	0.333333	0.96892	0.284768	1	1	A0A0D1DY39_USTMA
biological_process	GO:2000134	negative regulation of G1/S transition of mitotic cell cycle	1	1	1	0.942158	0.36041	1	1	A0A0D1DY39_USTMA
biological_process	GO:0048026	positive regulation of mRNA splicing, via spliceosome	1	2	0.5	0.988859	0.200206	1	1	A0A0D1DY39_USTMA
biological_process	GO:0016311	dephosphorylation	1	9	0.111111	0.56343	0.621065	1	1	A0A0D1E0C2_USTMA
biological_process	GO:0097552	mitochondrial double-strand break repair via homologous recombination	1	1	1	1	0.105674	1	1	A0A0D1BXI7_USTMA
biological_process	GO:0031573	mitotic intra-S DNA damage checkpoint signaling	1	5	0.2	0.910232	0.428071	1	1	A0A0D1BXI7_USTMA
molecular_function	GO:0034618	arginine binding	1	2	0.5	0.989859	0.191486	1	1	A0A0D1CI67_USTMA
biological_process	GO:0016310	phosphorylation	1	7	0.142857	0.995398	0.00944407	1	0.973	A0A0D1CI67_USTMA
molecular_function	GO:0015369	calcium:proton antiporter activity	1	3	0.333333	0.971613	0.273035	1	1	A0A0D1DXI2_USTMA
molecular_function	GO:0042826	histone deacetylase binding	1	3	0.333333	0.971613	0.273035	1	1	A0A0D1BWL5_USTMA
cellular_component	GO:0008278	cohesin complex	1	2	0.5	0.996182	0.0534745	1	1	A0A0D1DZS4_USTMA
biological_process	GO:0007062	sister chromatid cohesion	1	6	0.166667	0.965544	0.114234	1	1	A0A0D1DZS4_USTMA
cellular_component	GO:0046695	SLIK (SAGA-like) complex	1	3	0.333333	0.971354	0.274183	1	1	A0A0D1C8N6_USTMA
biological_process	GO:0010811	positive regulation of cell-substrate adhesion	1	1	1	1	0.105674	1	1	A0A0D1CHB9_USTMA
molecular_function	GO:0019905	syntaxin binding	1	8	0.125	0.810789	0.572966	1	1	A0A0D1DYZ9_USTMA
molecular_function	GO:0004168	dolichol kinase activity	1	1	1	1	0.100813	1	1	A0A0D1DW30_USTMA
biological_process	GO:0043048	dolichyl monophosphate biosynthetic process	1	1	1	1	0.105674	1	1	A0A0D1DW30_USTMA
cellular_component	GO:0071339	MLL1 complex	1	2	0.5	0.989763	0.192338	1	1	A0A0D1E5X6_USTMA
cellular_component	GO:0090575	RNA polymerase II transcription regulator complex	1	2	0.5	0.885165	0.230703	1	1	A0A0D1E5X6_USTMA
molecular_function	GO:1990837	sequence-specific double-stranded DNA binding	1	2	0.5	1	5.06906e-10	1	0	A0A0D1E5X6_USTMA
cellular_component	GO:0005786	signal recognition particle, endoplasmic reticulum targeting	1	5	0.2	0.916761	0.413882	1	1	A0A0D1CDU8_USTMA
molecular_function	GO:0008312	7S RNA binding	1	6	0.166667	0.884251	0.471654	1	1	A0A0D1CDU8_USTMA
molecular_function	GO:0015205	nucleobase transmembrane transporter activity	1	3	0.333333	0.884251	0.471654	1	1	A0A0D1C321_USTMA
cellular_component	GO:0032777	Piccolo NuA4 histone acetyltransferase complex	1	1	1	1	0.101287	1	1	A0A0D1E5B1_USTMA
biological_process	GO:0051123	RNA polymerase II preinitiation complex assembly	1	8	0.125	0.76491	0.516337	1	1	A0A0D1C8N6_USTMA
molecular_function	GO:0016627	oxidoreductase activity, acting on the CH-CH group of donors	1	9	0.111111	0.263817	0.900107	1	1	A0A0D1DMF7_USTMA
biological_process	GO:0000710	meiotic mismatch repair	1	3	0.333333	0.96892	0.284768	1	1	A0A0D1CF39_USTMA
cellular_component	GO:0031105	septin complex	1	4	0.25	0.946526	0.347753	1	1	A0A0D1CPV5_USTMA
cellular_component	GO:0005940	septin ring	1	5	0.2	0.916761	0.413882	1	1	A0A0D1CPV5_USTMA
biological_process	GO:0061640	cytoskeleton-dependent cytokinesis	1	5	0.2	0.76491	0.516337	1	1	A0A0D1CPV5_USTMA
cellular_component	GO:0030915	Smc5-Smc6 complex	1	5	0.2	0.916761	0.413882	1	1	A0A0D1C3F5_USTMA
cellular_component	GO:0005770	late endosome	1	15	0.0666667	0.590495	0.643227	1	1	A0A0D1CXP7_USTMA
biological_process	GO:0000290	deadenylation-dependent decapping of nuclear-transcribed mRNA	1	5	0.2	0.910232	0.428071	1	1	A0A0D1DW69_USTMA
biological_process	GO:0006289	nucleotide-excision repair	1	16	0.0625	0.394951	0.827546	1	1	A0A0D1DU59_USTMA
cellular_component	GO:0034271	phosphatidylinositol 3-kinase complex, class III, type I	1	3	0.333333	0.971354	0.274183	1	1	A0A0D1CXP7_USTMA
cellular_component	GO:0034272	phosphatidylinositol 3-kinase complex, class III, type II	1	3	0.333333	0.971354	0.274183	1	1	A0A0D1CXP7_USTMA
biological_process	GO:0045324	late endosome to vacuole transport	1	6	0.166667	0.971572	0.0876153	1	1	A0A0D1CXP7_USTMA
biological_process	GO:0006402	mRNA catabolic process	1	2	0.5	0.953294	0.0955402	1	1	A0A0D1EAA3_USTMA
biological_process	GO:1990074	polyuridylation-dependent mRNA catabolic process	1	1	1	1	0.105674	1	1	A0A0D1EAA3_USTMA
biological_process	GO:0006904	vesicle docking involved in exocytosis	1	6	0.166667	0.874525	0.48859	1	1	A0A0D1E3Z5_USTMA
biological_process	GO:0043171	peptide catabolic process	1	3	0.333333	0.796175	0.591133	1	1	A0A0D1E264_USTMA
biological_process	GO:0051603	proteolysis involved in cellular protein catabolic process	1	3	0.333333	0.710556	0.378797	1	1	A0A0D1E264_USTMA
molecular_function	GO:0008235	metalloexopeptidase activity	1	6	0.166667	0.72987	0.554811	1	1	A0A0D1DX26_USTMA
biological_process	GO:0000054	ribosomal subunit export from nucleus	1	5	0.2	0.959481	0.150962	1	1	A0A0D1CH86_USTMA
molecular_function	GO:0004550	nucleoside diphosphate kinase activity	1	4	0.25	0.946991	0.346377	1	1	A0A0D1C4S0_USTMA
molecular_function	GO:0004798	thymidylate kinase activity	1	1	1	1	0.100813	1	1	A0A0D1C4S0_USTMA
molecular_function	GO:0009041	uridylate kinase activity	1	1	1	0.989859	0.191486	1	1	A0A0D1C4S0_USTMA
biological_process	GO:0006233	dTDP biosynthetic process	1	1	1	1	0.105674	1	1	A0A0D1C4S0_USTMA
biological_process	GO:0006235	dTTP biosynthetic process	1	2	0.5	0.988859	0.200206	1	1	A0A0D1C4S0_USTMA
biological_process	GO:0006227	dUDP biosynthetic process	1	1	1	1	0.105674	1	1	A0A0D1C4S0_USTMA
molecular_function	GO:0001139	RNA polymerase II complex recruiting activity	1	3	0.333333	0.971613	0.273035	1	1	A0A0D1EAA7_USTMA
molecular_function	GO:0002161	aminoacyl-tRNA editing activity	1	6	0.166667	0.848406	0.524997	1	1	A0A0D1CP62_USTMA
molecular_function	GO:0004832	valine-tRNA ligase activity	1	1	1	1	0.100813	1	1	A0A0D1CP62_USTMA
biological_process	GO:0006438	valyl-tRNA aminoacylation	1	1	1	1	0.105674	1	1	A0A0D1CP62_USTMA
molecular_function	GO:0016421	CoA carboxylase activity	1	2	0.5	0.971613	0.273035	1	1	A0A0D1DUI3_USTMA
molecular_function	GO:0004485	methylcrotonoyl-CoA carboxylase activity	1	2	0.5	0.989859	0.191486	1	1	A0A0D1DUI3_USTMA
cellular_component	GO:0035838	growing cell tip	1	3	0.333333	0.983662	0.116689	1	1	A0A0D1D1B0_USTMA
molecular_function	GO:0008597	calcium-dependent protein serine/threonine phosphatase regulator activity	1	2	0.5	0.989859	0.191486	1	1	A0A0D1E741_USTMA
biological_process	GO:0030989	dynein-driven meiotic oscillatory nuclear movement	1	1	1	1	0.105674	1	1	A0A0D1DYR5_USTMA
biological_process	GO:0032065	maintenance of protein location in cell cortex	1	1	1	1	0.105674	1	1	A0A0D1DYR5_USTMA
cellular_component	GO:0030125	clathrin vesicle coat	1	4	0.25	0.907935	0.308136	1	1	A0A0D1DY37_USTMA
molecular_function	GO:0004484	mRNA guanylyltransferase activity	1	2	0.5	0.989859	0.191486	1	1	A0A0D1DQ99_USTMA
molecular_function	GO:0017128	phospholipid scramblase activity	1	1	1	1	0.100813	1	1	A0A0D1CFZ1_USTMA
biological_process	GO:0017121	plasma membrane phospholipid scrambling	1	1	1	1	0.105674	1	1	A0A0D1CFZ1_USTMA
molecular_function	GO:0004385	guanylate kinase activity	1	1	1	1	0.100813	1	1	A0A0D1DZ04_USTMA
biological_process	GO:0046711	GDP biosynthetic process	1	1	1	1	0.105674	1	1	A0A0D1DZ04_USTMA
molecular_function	GO:0051959	dynein light intermediate chain binding	1	4	0.25	0.946991	0.346377	1	1	A0A0D1DSG8_USTMA
molecular_function	GO:0000822	inositol hexakisphosphate binding	1	3	0.333333	0.971613	0.273035	1	1	A0A0D1C1B9_USTMA
molecular_function	GO:0003935	GTP cyclohydrolase II activity	1	2	0.5	0.989859	0.191486	1	1	A0A0D1DQS9_USTMA
biological_process	GO:0009231	riboflavin biosynthetic process	1	7	0.142857	0.836189	0.54272	1	1	A0A0D1DQS9_USTMA
cellular_component	GO:1990537	mitotic spindle polar microtubule	1	1	1	1	0.101287	1	1	A0A0D1CUN2_USTMA
biological_process	GO:1990758	mitotic sister chromatid biorientation	1	3	0.333333	0.96892	0.284768	1	1	A0A0D1CUN2_USTMA
molecular_function	GO:0070290	N-acylphosphatidylethanolamine-specific phospholipase D activity	1	5	0.2	0.917459	0.412336	1	1	A0A0D1D0E6_USTMA
molecular_function	GO:0004630	phospholipase D activity	1	1	1	1	0.100813	1	1	A0A0D1D0E6_USTMA
biological_process	GO:0050790	regulation of catalytic activity	1	6	0.166667	0.838813	0.257164	1	1	A0A0D1E669_USTMA
biological_process	GO:0009166	nucleotide catabolic process	1	4	0.25	0.555504	0.791221	1	1	A0A0D1CGW4_USTMA
biological_process	GO:0042149	cellular response to glucose starvation	1	5	0.2	0.910232	0.428071	1	1	A0A0D1E669_USTMA
biological_process	GO:0006493	protein O-linked glycosylation	1	2	0.5	0.959481	0.150962	1	1	A0A0D1E7S4_USTMA
biological_process	GO:0031138	negative regulation of conjugation with cellular fusion	1	2	0.5	0.96892	0.284768	1	1	A0A0D1DSI6_USTMA
cellular_component	GO:0005674	transcription factor TFIIF complex	1	2	0.5	0.989763	0.192338	1	1	A0A0D1CRA1_USTMA
molecular_function	GO:0003725	double-stranded RNA binding	1	6	0.166667	0.732991	0.65489	1	1	A0A0D1BVX2_USTMA
biological_process	GO:2000785	regulation of autophagosome assembly	1	2	0.5	0.988859	0.200206	1	1	A0A0D1E8X2_USTMA
molecular_function	GO:0017057	6-phosphogluconolactonase activity	1	4	0.25	0.946991	0.346377	1	1	A0A0D1CM18_USTMA
biological_process	GO:0045053	protein retention in Golgi apparatus	1	5	0.2	0.910232	0.428071	1	1	A0A0D1BW76_USTMA
cellular_component	GO:0000813	ESCRT I complex	1	2	0.5	0.989763	0.192338	1	1	A0A0D1E641_USTMA
biological_process	GO:0046777	protein autophosphorylation	1	6	0.166667	0.874525	0.48859	1	1	A0A0D1CRA9_USTMA
biological_process	GO:0006783	heme biosynthetic process	1	7	0.142857	0.632887	0.73876	1	1	A0A0D1CJ01_USTMA
molecular_function	GO:0045504	dynein heavy chain binding	1	2	0.5	0.989859	0.191486	1	1	A0A0D1E0Z1_USTMA
biological_process	GO:0035965	cardiolipin acyl-chain remodeling	1	2	0.5	0.988859	0.200206	1	1	A0A0D1DTF9_USTMA
molecular_function	GO:0016811	hydrolase activity, acting on carbon-nitrogen (but not peptide) bonds, in linear amides	1	2	0.5	0.415516	0.78345	1	1	A0A0D1E0Z5_USTMA
biological_process	GO:0006807	nitrogen compound metabolic process	1	12	0.0833333	0.86853	0.156056	1	1	A0A0D1E0Z5_USTMA
cellular_component	GO:0030286	dynein complex	1	4	0.25	0.973532	0.152777	1	1	A0A0D1DSG8_USTMA
molecular_function	GO:0045505	dynein intermediate chain binding	1	4	0.25	0.946991	0.346377	1	1	A0A0D1DSG8_USTMA
biological_process	GO:0048278	vesicle docking	1	6	0.166667	0.93462	0.206047	1	1	A0A0D1DYV8_USTMA
biological_process	GO:0006906	vesicle fusion	1	9	0.111111	0.644497	0.640423	1	1	A0A0D1DYV8_USTMA
biological_process	GO:0045903	positive regulation of translational fidelity	1	3	0.333333	0.96892	0.284768	1	1	A0A0D1DTL3_USTMA
molecular_function	GO:0061981	3-hydroxykynureninase activity	1	1	1	1	0.100813	1	1	A0A0D1DQV3_USTMA
molecular_function	GO:0030429	kynureninase activity	1	1	1	1	0.100813	1	1	A0A0D1DQV3_USTMA
biological_process	GO:0097053	L-kynurenine catabolic process	1	1	1	1	0.105674	1	1	A0A0D1DQV3_USTMA
biological_process	GO:0019441	tryptophan catabolic process to kynurenine	1	6	0.166667	0.874525	0.48859	1	1	A0A0D1DQV3_USTMA
cellular_component	GO:0005795	Golgi stack	1	4	0.25	0.73115	0.656701	1	1	A0A0D1E2T0_USTMA
biological_process	GO:0048211	Golgi vesicle docking	1	3	0.333333	0.96892	0.284768	1	1	A0A0D1E2T0_USTMA
biological_process	GO:0061025	membrane fusion	1	7	0.142857	0.632214	0.605049	1	1	A0A0D1E2T0_USTMA
biological_process	GO:0045056	transcytosis	1	2	0.5	0.988859	0.200206	1	1	A0A0D1E2T0_USTMA
biological_process	GO:0009051	pentose-phosphate shunt, oxidative branch	1	3	0.333333	0.96892	0.284768	1	1	A0A0D1CM18_USTMA
biological_process	GO:0070475	rRNA base methylation	1	5	0.2	0.836189	0.54272	1	1	A0A0D1DTQ7_USTMA
molecular_function	GO:0008418	protein-N-terminal asparagine amidohydrolase activity	1	2	0.5	0.989859	0.191486	1	1	A0A0D1DV77_USTMA
molecular_function	GO:0070773	protein-N-terminal glutamine amidohydrolase activity	1	2	0.5	0.989859	0.191486	1	1	A0A0D1DV77_USTMA
biological_process	GO:0015851	nucleobase transport	1	2	0.5	0.910232	0.428071	1	1	A0A0D1C321_USTMA
cellular_component	GO:0071561	nucleus-vacuole junction	1	1	1	1	0.101287	1	1	A0A0D1CXP7_USTMA
molecular_function	GO:0008138	protein tyrosine/serine/threonine phosphatase activity	1	5	0.2	0.917459	0.412336	1	1	A0A0D1DRB9_USTMA
cellular_component	GO:0031588	nucleotide-activated protein kinase complex	1	3	0.333333	0.971354	0.274183	1	1	A0A0D1E669_USTMA
molecular_function	GO:0051213	dioxygenase activity	1	6	0.166667	0.78196	0.441384	1	1	A0A0D1CJ01_USTMA
cellular_component	GO:0008275	gamma-tubulin small complex	1	3	0.333333	0.971354	0.274183	1	1	A0A0D1BZI3_USTMA
biological_process	GO:0042176	regulation of protein catabolic process	1	3	0.333333	0.947859	0.177914	1	1	A0A0D1E262_USTMA
biological_process	GO:0034389	lipid droplet organization	1	3	0.333333	0.942158	0.36041	1	1	A0A0D1DTN0_USTMA
biological_process	GO:0019752	carboxylic acid metabolic process	1	5	0.2	3.80215e-05	0.999987	0.004	1	A0A0D1CWW1_USTMA
molecular_function	GO:0001227	DNA-binding transcription repressor activity, RNA polymerase II-specific	1	1	1	1	0.100813	1	1	A0A0D1DQY1_USTMA
biological_process	GO:0045732	positive regulation of protein catabolic process	1	4	0.25	0.956231	0.203825	1	1	A0A0D1DVT1_USTMA
cellular_component	GO:0044545	NSL complex	1	2	0.5	0.989763	0.192338	1	1	A0A0D1CNC6_USTMA
biological_process	GO:0001080	nitrogen catabolite activation of transcription from RNA polymerase II promoter	1	2	0.5	0.988859	0.200206	1	1	A0A0D1DTV6_USTMA
cellular_component	GO:0005667	transcription regulator complex	1	3	0.333333	0.829245	0.28862	1	1	A0A0D1CFL6_USTMA
molecular_function	GO:0061629	RNA polymerase II-specific DNA-binding transcription factor binding	1	3	0.333333	0.971613	0.273035	1	1	A0A0D1CFL6_USTMA
cellular_component	GO:1990112	RQC complex	1	2	0.5	0.989763	0.192338	1	1	A0A0D1DN11_USTMA
biological_process	GO:0072344	rescue of stalled ribosome	1	4	0.25	0.942158	0.36041	1	1	A0A0D1DN11_USTMA
biological_process	GO:1990116	ribosome-associated ubiquitin-dependent protein catabolic process	1	2	0.5	0.988859	0.200206	1	1	A0A0D1DN11_USTMA
molecular_function	GO:0035064	methylated histone binding	1	4	0.25	0.946991	0.346377	1	1	A0A0D1CPX3_USTMA
molecular_function	GO:0008239	dipeptidyl-peptidase activity	1	3	0.333333	0.971613	0.273035	1	1	A0A0D1E8Z6_USTMA
molecular_function	GO:0000339	RNA cap binding	1	4	0.25	0.77212	0.616102	1	1	A0A0D1BY36_USTMA
biological_process	GO:0016070	RNA metabolic process	1	3	0.333333	0.999997	4.49522e-06	1	0.004	A0A0D1E3U8_USTMA
molecular_function	GO:0140078	class I DNA-(apurinic or apyrimidinic site) endonuclease activity	1	2	0.5	0.989859	0.191486	1	1	A0A0D1DYV1_USTMA
molecular_function	GO:0000703	oxidized pyrimidine nucleobase lesion DNA N-glycosylase activity	1	1	1	1	0.100813	1	1	A0A0D1DYV1_USTMA
biological_process	GO:0006285	base-excision repair, AP site formation	1	4	0.25	0.910232	0.428071	1	1	A0A0D1DYV1_USTMA
molecular_function	GO:0008251	tRNA-specific adenosine deaminase activity	1	2	0.5	0.989859	0.191486	1	1	A0A0D1BVX2_USTMA
molecular_function	GO:0004066	asparagine synthase (glutamine-hydrolyzing) activity	1	2	0.5	0.989859	0.191486	1	1	A0A0D1DVU7_USTMA
biological_process	GO:0006529	asparagine biosynthetic process	1	2	0.5	0.988859	0.200206	1	1	A0A0D1DVU7_USTMA
cellular_component	GO:0019005	SCF ubiquitin ligase complex	1	10	0.1	0.614924	0.751033	1	1	A0A0D1ED76_USTMA
biological_process	GO:0006882	cellular zinc ion homeostasis	1	3	0.333333	0.96892	0.284768	1	1	A0A0D1CH16_USTMA
cellular_component	GO:0044614	nuclear pore cytoplasmic filaments	1	2	0.5	0.989763	0.192338	1	1	A0A0D1EAJ6_USTMA
molecular_function	GO:0043812	phosphatidylinositol-4-phosphate phosphatase activity	1	3	0.333333	0.971613	0.273035	1	1	A0A0D1E449_USTMA
biological_process	GO:0043162	ubiquitin-dependent protein catabolic process via the multivesicular body sorting pathway	1	1	1	0.991945	0.0405186	1	1	A0A0D1E641_USTMA
molecular_function	GO:0004516	nicotinate phosphoribosyltransferase activity	1	1	1	1	0.100813	1	1	A0A0D1CKK3_USTMA
molecular_function	GO:0004514	nicotinate-nucleotide diphosphorylase (carboxylating) activity	1	2	0.5	0.989859	0.191486	1	1	A0A0D1CKK3_USTMA
biological_process	GO:0034355	NAD salvage	1	1	1	1	0.105674	1	1	A0A0D1CKK3_USTMA
molecular_function	GO:0015114	phosphate ion transmembrane transporter activity	1	1	1	1	0.100813	1	1	A0A0D1C1B9_USTMA
biological_process	GO:0016036	cellular response to phosphate starvation	1	1	1	1	0.105674	1	1	A0A0D1C1B9_USTMA
molecular_function	GO:0008569	minus-end-directed microtubule motor activity	1	2	0.5	0.989859	0.191486	1	1	A0A0D1DSG8_USTMA
molecular_function	GO:0017168	5-oxoprolinase (ATP-hydrolyzing) activity	1	2	0.5	0.989859	0.191486	1	1	A0A0D1DZ67_USTMA
cellular_component	GO:0005771	multivesicular body	1	9	0.111111	0.691864	0.691557	1	1	A0A0D1BW71_USTMA
molecular_function	GO:0000285	1-phosphatidylinositol-3-phosphate 5-kinase activity	1	2	0.5	0.989859	0.191486	1	1	A0A0D1DMX3_USTMA
biological_process	GO:0043001	Golgi to plasma membrane protein transport	1	5	0.2	0.910232	0.428071	1	1	A0A0D1E5F6_USTMA
biological_process	GO:0033365	protein localization to organelle	1	1	1	0.900492	0.150017	1	1	A0A0D1E5F6_USTMA
molecular_function	GO:0072354	histone kinase activity (H3-T3 specific)	1	1	1	1	0.100813	1	1	A0A0D1EB32_USTMA
biological_process	GO:0000160	phosphorelay signal transduction system	1	5	0.2	0.874525	0.48859	1	1	A0A0D1CAE8_USTMA
biological_process	GO:0034058	endosomal vesicle fusion	1	4	0.25	0.942158	0.36041	1	1	A0A0D1CQS0_USTMA
molecular_function	GO:0043682	P-type divalent copper transporter activity	1	2	0.5	0.989859	0.191486	1	1	A0A0D1EBR9_USTMA
cellular_component	GO:0034245	mitochondrial DNA-directed RNA polymerase complex	1	1	1	1	0.101287	1	1	A0A0D1E254_USTMA
molecular_function	GO:0001018	mitochondrial promoter sequence-specific DNA binding	1	1	1	1	0.100813	1	1	A0A0D1E254_USTMA
biological_process	GO:0006390	mitochondrial transcription	1	1	1	1	0.105674	1	1	A0A0D1E254_USTMA
molecular_function	GO:0003747	translation release factor activity	1	4	0.25	0.917459	0.412336	1	1	A0A0D1DSQ2_USTMA
cellular_component	GO:0009331	glycerol-3-phosphate dehydrogenase complex	1	2	0.5	0.989763	0.192338	1	1	A0A0D1CVJ0_USTMA
molecular_function	GO:0052591	sn-glycerol-3-phosphate:ubiquinone-8 oxidoreductase activity	1	1	1	1	0.100813	1	1	A0A0D1CVJ0_USTMA
biological_process	GO:0006072	glycerol-3-phosphate metabolic process	1	3	0.333333	0.942158	0.36041	1	1	A0A0D1CVJ0_USTMA
molecular_function	GO:0008495	protoheme IX farnesyltransferase activity	1	1	1	1	0.100813	1	1	A0A0D1CJ01_USTMA
biological_process	GO:0045333	cellular respiration	1	2	0.5	0.0180941	0.99611	0.874	1	A0A0D1CJ01_USTMA
biological_process	GO:0048034	heme O biosynthetic process	1	1	1	1	0.105674	1	1	A0A0D1CJ01_USTMA
biological_process	GO:0030970	retrograde protein transport, ER to cytosol	1	2	0.5	0.988859	0.200206	1	1	A0A0D1CKY1_USTMA
cellular_component	GO:0031902	late endosome membrane	1	3	0.333333	0.847223	0.526744	1	1	A0A0D1CR50_USTMA
molecular_function	GO:0008022	protein C-terminus binding	1	3	0.333333	0.971613	0.273035	1	1	A0A0D1DSQ2_USTMA
cellular_component	GO:1904423	dehydrodolichyl diphosphate synthase complex	1	2	0.5	0.989763	0.192338	1	1	A0A0D1DQG5_USTMA
biological_process	GO:0019408	dolichol biosynthetic process	1	2	0.5	0.988859	0.200206	1	1	A0A0D1DQG5_USTMA
cellular_component	GO:0016602	CCAAT-binding factor complex	1	3	0.333333	0.971354	0.274183	1	1	A0A0D1CWI1_USTMA
molecular_function	GO:0004567	beta-mannosidase activity	1	1	1	0.971613	0.273035	1	1	A0A0D1CUQ3_USTMA
biological_process	GO:0006516	glycoprotein catabolic process	1	2	0.5	0.988859	0.200206	1	1	A0A0D1CUQ3_USTMA
molecular_function	GO:0008236	serine-type peptidase activity	1	3	0.333333	0.287206	0.922541	1	1	A0A0D1E8Z6_USTMA
biological_process	GO:0019915	lipid storage	1	4	0.25	0.874525	0.48859	1	1	A0A0D1DTN0_USTMA
biological_process	GO:0071108	protein K48-linked deubiquitination	1	2	0.5	0.988859	0.200206	1	1	A0A0D1BUU2_USTMA
molecular_function	GO:0004713	protein tyrosine kinase activity	1	2	0.5	0.946991	0.346377	1	1	A0A0D1E724_USTMA
molecular_function	GO:0004352	glutamate dehydrogenase (NAD+) activity	1	1	1	1	0.100813	1	1	A0A0D1DTH0_USTMA
biological_process	GO:0019551	glutamate catabolic process to 2-oxoglutarate	1	1	1	1	0.105674	1	1	A0A0D1DTH0_USTMA
biological_process	GO:0006000	fructose metabolic process	1	4	0.25	0.942158	0.36041	1	1	A0A0D1E4A1_USTMA
biological_process	GO:0051973	positive regulation of telomerase activity	1	2	0.5	0.988859	0.200206	1	1	A0A0D1CEA6_USTMA
molecular_function	GO:0048040	UDP-glucuronate decarboxylase activity	1	1	1	1	0.100813	1	1	A0A0D1CQE5_USTMA
biological_process	GO:0042732	D-xylose metabolic process	1	2	0.5	0.96892	0.284768	1	1	A0A0D1CQE5_USTMA
biological_process	GO:0033320	UDP-D-xylose biosynthetic process	1	1	1	1	0.105674	1	1	A0A0D1CQE5_USTMA
biological_process	GO:0009074	aromatic amino acid family catabolic process	1	1	1	0.849038	0.406413	1	1	A0A0D1EB74_USTMA
molecular_function	GO:0004605	phosphatidate cytidylyltransferase activity	1	2	0.5	0.989859	0.191486	1	1	A0A0D1CTA0_USTMA
biological_process	GO:0016024	CDP-diacylglycerol biosynthetic process	1	2	0.5	0.988859	0.200206	1	1	A0A0D1CTA0_USTMA
molecular_function	GO:0061575	cyclin-dependent protein serine/threonine kinase activator activity	1	4	0.25	0.946991	0.346377	1	1	A0A0D1CL12_USTMA
biological_process	GO:0051293	establishment of spindle localization	1	2	0.5	0.874525	0.48859	1	1	A0A0D1DSG8_USTMA
cellular_component	GO:0098753	anchored component of the cytoplasmic side of the plasma membrane	1	1	1	1	0.101287	1	1	A0A0D1EBL3_USTMA
cellular_component	GO:0120104	mitotic actomyosin contractile ring, proximal layer	1	1	1	1	0.101287	1	1	A0A0D1EBL3_USTMA
biological_process	GO:1903476	protein localization to cell division site involved in mitotic actomyosin contractile ring assembly	1	1	1	1	0.105674	1	1	A0A0D1EBL3_USTMA
molecular_function	GO:0036374	glutathione hydrolase activity	1	4	0.25	0.946991	0.346377	1	1	A0A0D1E0D8_USTMA
molecular_function	GO:0102953	hypoglycin A gamma-glutamyl transpeptidase activity	1	3	0.333333	0.971613	0.273035	1	1	A0A0D1E0D8_USTMA
molecular_function	GO:0103068	leukotriene C4 gamma-glutamyl transferase activity	1	3	0.333333	0.971613	0.273035	1	1	A0A0D1E0D8_USTMA
cellular_component	GO:0005846	nuclear cap binding complex	1	2	0.5	0.989763	0.192338	1	1	A0A0D1BY36_USTMA
biological_process	GO:0000917	division septum assembly	1	1	1	0.836189	0.54272	1	1	A0A0D1DR37_USTMA
biological_process	GO:0032995	regulation of fungal-type cell wall biogenesis	1	2	0.5	0.988859	0.200206	1	1	A0A0D1DZF1_USTMA
molecular_function	GO:0003972	RNA ligase (ATP) activity	1	2	0.5	0.989859	0.191486	1	1	A0A0D1CGQ9_USTMA
biological_process	GO:0045861	negative regulation of proteolysis	1	2	0.5	0.942158	0.36041	1	1	A0A0D1CJW5_USTMA
biological_process	GO:0051276	chromosome organization	1	2	0.5	0.985954	0.0230845	1	1	A0A0D1DSI0_USTMA
cellular_component	GO:0051285	cell cortex of cell tip	1	5	0.2	0.847223	0.526744	1	1	A0A0D1EDP6_USTMA
biological_process	GO:0001522	pseudouridine synthesis	1	3	0.333333	0.593587	0.766455	1	1	A0A0D1CPZ3_USTMA
biological_process	GO:0051307	meiotic chromosome separation	1	1	1	0.984641	0.0800355	1	1	A0A0D1E266_USTMA
biological_process	GO:0031440	regulation of mRNA 3'-end processing	1	2	0.5	0.96892	0.284768	1	1	A0A0D1EAA7_USTMA
biological_process	GO:0031564	transcription antitermination	1	3	0.333333	0.96892	0.284768	1	1	A0A0D1EAA7_USTMA
molecular_function	GO:0004698	calcium-dependent protein kinase C activity	1	1	1	1	0.100813	1	1	A0A0D1DRE2_USTMA
cellular_component	GO:0000214	tRNA-intron endonuclease complex	1	4	0.25	0.946526	0.347753	1	1	A0A0D1BXJ9_USTMA
biological_process	GO:0000379	tRNA-type intron splice site recognition and cleavage	1	4	0.25	0.942158	0.36041	1	1	A0A0D1BXJ9_USTMA
cellular_component	GO:0000506	glycosylphosphatidylinositol-N-acetylglucosaminyltransferase (GPI-GnT) complex	1	3	0.333333	0.971354	0.274183	1	1	A0A0D1CKY9_USTMA
biological_process	GO:0031297	replication fork processing	1	4	0.25	0.836189	0.54272	1	1	A0A0D1C943_USTMA
biological_process	GO:0032786	positive regulation of DNA-templated transcription, elongation	1	4	0.25	0.76491	0.516337	1	1	A0A0D1CL12_USTMA
biological_process	GO:0006337	nucleosome disassembly	1	1	1	1	0.105674	1	1	A0A0D1DXZ0_USTMA
molecular_function	GO:0030544	Hsp70 protein binding	1	5	0.2	0.917459	0.412336	1	1	A0A0D1DZE7_USTMA
molecular_function	GO:0000253	3-keto sterol reductase activity	1	1	1	1	0.100813	1	1	A0A0D1DXN0_USTMA
molecular_function	GO:0019237	centromeric DNA binding	1	1	1	1	0.100813	1	1	A0A0D1E8Y7_USTMA
biological_process	GO:0051455	monopolar spindle attachment to meiosis I kinetochore	1	1	1	1	0.105674	1	1	A0A0D1E8Y7_USTMA
cellular_component	GO:0048189	Lid2 complex	1	1	1	1	0.101287	1	1	A0A0D1CI28_USTMA
biological_process	GO:0036205	histone catabolic process	1	2	0.5	0.988859	0.200206	1	1	A0A0D1CI28_USTMA
biological_process	GO:0043619	regulation of transcription from RNA polymerase II promoter in response to oxidative stress	1	1	1	1	0.105674	1	1	A0A0D1CI28_USTMA
biological_process	GO:0090522	vesicle tethering involved in exocytosis	1	2	0.5	0.988859	0.200206	1	1	A0A0D1E3Z5_USTMA
biological_process	GO:0009653	anatomical structure morphogenesis	1	1	1	0.898444	0.243771	1	1	A0A0D1BUZ6_USTMA
molecular_function	GO:0030942	endoplasmic reticulum signal peptide binding	1	3	0.333333	0.971613	0.273035	1	1	A0A0D1CDU8_USTMA
cellular_component	GO:1902929	plasma membrane of growing cell tip	1	1	1	1	0.101287	1	1	A0A0D1C9X8_USTMA
biological_process	GO:0061161	positive regulation of establishment of bipolar cell polarity regulating cell shape	1	1	1	1	0.105674	1	1	A0A0D1C9X8_USTMA
cellular_component	GO:0016281	eukaryotic translation initiation factor 4F complex	1	3	0.333333	0.971354	0.274183	1	1	A0A0D1DU52_USTMA
molecular_function	GO:0005047	signal recognition particle binding	1	2	0.5	0.989859	0.191486	1	1	A0A0D1CDU8_USTMA
biological_process	GO:0044773	mitotic DNA damage checkpoint signaling	1	2	0.5	0.96947	0.125475	1	1	A0A0D1E136_USTMA
molecular_function	GO:0017136	NAD-dependent histone deacetylase activity	1	3	0.333333	0.848406	0.524997	1	1	A0A0D1DSY4_USTMA
molecular_function	GO:0046970	NAD-dependent histone deacetylase activity (H4-K16 specific)	1	2	0.5	0.989859	0.191486	1	1	A0A0D1DSY4_USTMA
biological_process	GO:0050708	regulation of protein secretion	1	2	0.5	0.988859	0.200206	1	1	A0A0D1BZG9_USTMA
molecular_function	GO:0015230	FAD transmembrane transporter activity	1	2	0.5	0.989859	0.191486	1	1	A0A0D1DQD1_USTMA
molecular_function	GO:0008517	folic acid transmembrane transporter activity	1	1	1	1	0.100813	1	1	A0A0D1DQD1_USTMA
biological_process	GO:0006607	NLS-bearing protein import into nucleus	1	2	0.5	0.988859	0.200206	1	1	A0A0D1E1J0_USTMA
molecular_function	GO:0016314	phosphatidylinositol-3,4,5-trisphosphate 3-phosphatase activity	1	1	1	1	0.100813	1	1	A0A0D1E0C2_USTMA
biological_process	GO:0014065	phosphatidylinositol 3-kinase signaling	1	1	1	1	0.105674	1	1	A0A0D1E0C2_USTMA
biological_process	GO:0051896	regulation of protein kinase B signaling	1	1	1	1	0.105674	1	1	A0A0D1E0C2_USTMA
cellular_component	GO:0090694	Scc2-Scc4 cohesin loading complex	1	1	1	1	0.101287	1	1	A0A0D1DWG5_USTMA
biological_process	GO:0034087	establishment of mitotic sister chromatid cohesion	1	1	1	1	0.105674	1	1	A0A0D1DWG5_USTMA
biological_process	GO:0071169	establishment of protein localization to chromatin	1	1	1	1	0.105674	1	1	A0A0D1DWG5_USTMA
biological_process	GO:1905406	positive regulation of mitotic cohesin loading	1	1	1	1	0.105674	1	1	A0A0D1DWG5_USTMA
biological_process	GO:0009094	L-phenylalanine biosynthetic process	1	2	0.5	0.988859	0.200206	1	1	A0A0D1E873_USTMA
molecular_function	GO:0003873	6-phosphofructo-2-kinase activity	1	2	0.5	0.989859	0.191486	1	1	A0A0D1E4A1_USTMA
molecular_function	GO:0004331	fructose-2,6-bisphosphate 2-phosphatase activity	1	2	0.5	0.989859	0.191486	1	1	A0A0D1E4A1_USTMA
biological_process	GO:0006003	fructose 2,6-bisphosphate metabolic process	1	2	0.5	0.988859	0.200206	1	1	A0A0D1E4A1_USTMA
biological_process	GO:0072382	minus-end-directed vesicle transport along microtubule	1	1	1	1	0.105674	1	1	A0A0D1DSG8_USTMA
biological_process	GO:0010971	positive regulation of G2/M transition of mitotic cell cycle	1	2	0.5	0.96892	0.284768	1	1	A0A0D1E0F1_USTMA
biological_process	GO:0051754	meiotic sister chromatid cohesion, centromeric	1	1	1	1	0.105674	1	1	A0A0D1DQ09_USTMA
molecular_function	GO:0047884	FAD diphosphatase activity	1	1	1	1	0.100813	1	1	A0A0D1DMH8_USTMA
biological_process	GO:0042726	flavin-containing compound metabolic process	1	1	1	0.989959	0.0606326	1	1	A0A0D1DMH8_USTMA
cellular_component	GO:0030136	clathrin-coated vesicle	1	3	0.333333	0.929297	0.216015	1	1	A0A0D1E2P1_USTMA
cellular_component	GO:0140445	chromosome, telomeric repeat region	1	2	0.5	0.998968	0.0286462	1	0.998	A0A0D1E288_USTMA
biological_process	GO:0000493	box H/ACA snoRNP assembly	1	2	0.5	0.988859	0.200206	1	1	A0A0D1CPZ3_USTMA
molecular_function	GO:0001965	G-protein alpha-subunit binding	1	2	0.5	0.989859	0.191486	1	1	A0A0D1DTD9_USTMA
molecular_function	GO:0043743	LPPG:FO 2-phospho-L-lactate transferase activity	1	1	1	1	0.100813	1	1	A0A0D1CWF0_USTMA
molecular_function	GO:0004420	hydroxymethylglutaryl-CoA reductase (NADPH) activity	1	1	1	1	0.100813	1	1	A0A0D1E3E8_USTMA
biological_process	GO:0015936	coenzyme A metabolic process	1	1	1	0.956231	0.203825	1	1	A0A0D1E3E8_USTMA
biological_process	GO:0032436	positive regulation of proteasomal ubiquitin-dependent protein catabolic process	1	2	0.5	0.942158	0.36041	1	1	A0A0D1DYN0_USTMA
cellular_component	GO:1990816	vacuole-mitochondrion membrane contact site	1	1	1	1	0.101287	1	1	A0A0D1CH16_USTMA
molecular_function	GO:1903135	cupric ion binding	1	1	1	1	0.100813	1	1	A0A0D1CH16_USTMA
molecular_function	GO:0004113	2',3'-cyclic-nucleotide 3'-phosphodiesterase activity	1	1	1	1	0.100813	1	1	A0A0D1C923_USTMA
biological_process	GO:0009187	cyclic nucleotide metabolic process	1	1	1	0.998828	0.0310805	1	1	A0A0D1C923_USTMA
molecular_function	GO:0005384	manganese ion transmembrane transporter activity	1	3	0.333333	0.946991	0.346377	1	1	A0A0D1DPR0_USTMA
molecular_function	GO:0018024	histone-lysine N-methyltransferase activity	1	2	0.5	0.973865	0.151594	1	1	A0A0D1E0A0_USTMA
biological_process	GO:0034968	histone lysine methylation	1	1	1	0.796175	0.591133	1	1	A0A0D1E0A0_USTMA
biological_process	GO:0048268	clathrin coat assembly	1	3	0.333333	0.96892	0.284768	1	1	A0A0D1E2P1_USTMA
molecular_function	GO:0003916	DNA topoisomerase activity	1	1	1	0.971613	0.273035	1	1	A0A0D1C790_USTMA
molecular_function	GO:0016830	carbon-carbon lyase activity	1	1	1	0.622387	0.584484	1	1	A0A0D1CWW1_USTMA
molecular_function	GO:0032050	clathrin heavy chain binding	1	2	0.5	0.989859	0.191486	1	1	A0A0D1E2P1_USTMA
biological_process	GO:0000448	cleavage in ITS2 between 5.8S rRNA and LSU-rRNA of tricistronic rRNA transcript (SSU-rRNA, 5.8S rRNA, LSU-rRNA)	1	1	1	1	0.105674	1	1	A0A0D1CIK4_USTMA
molecular_function	GO:0016807	cysteine-type carboxypeptidase activity	1	1	1	1	0.100813	1	1	A0A0D1BUU2_USTMA
molecular_function	GO:1990380	Lys48-specific deubiquitinase activity	1	1	1	1	0.100813	1	1	A0A0D1BUU2_USTMA
molecular_function	GO:0004664	prephenate dehydratase activity	1	1	1	1	0.100813	1	1	A0A0D1E873_USTMA
cellular_component	GO:0005934	cellular bud tip	1	1	1	1	0.101287	1	1	A0A0D1BZG9_USTMA
biological_process	GO:0007118	budding cell apical bud growth	1	1	1	0.988859	0.200206	1	1	A0A0D1BZG9_USTMA
biological_process	GO:0060237	regulation of fungal-type cell wall organization	1	2	0.5	0.988859	0.200206	1	1	A0A0D1BZG9_USTMA
molecular_function	GO:0015086	cadmium ion transmembrane transporter activity	1	1	1	1	0.100813	1	1	A0A0D1DPR0_USTMA
cellular_component	GO:1990604	IRE1-TRAF2-ASK1 complex	1	1	1	1	0.101287	1	1	A0A0D1E0L4_USTMA
biological_process	GO:0070059	intrinsic apoptotic signaling pathway in response to endoplasmic reticulum stress	1	1	1	1	0.105674	1	1	A0A0D1E0L4_USTMA
molecular_function	GO:0032454	histone H3-methyl-lysine-9 demethylase activity	1	1	1	1	0.100813	1	1	A0A0D1BWW9_USTMA
molecular_function	GO:1990275	preribosome binding	1	1	1	1	0.100813	1	1	A0A0D1CEA6_USTMA
biological_process	GO:0009409	response to cold	1	1	1	1	0.105674	1	1	A0A0D1EA18_USTMA
molecular_function	GO:0061632	RNA lariat debranching enzyme activator activity	1	1	1	1	0.100813	1	1	A0A0D1DYQ6_USTMA
cellular_component	GO:0018444	translation release factor complex	1	2	0.5	0.989763	0.192338	1	1	A0A0D1DSQ2_USTMA
biological_process	GO:0002184	cytoplasmic translational termination	1	2	0.5	0.988859	0.200206	1	1	A0A0D1DSQ2_USTMA
biological_process	GO:1905775	negative regulation of DNA helicase activity	1	1	1	1	0.105674	1	1	A0A0D1E288_USTMA
molecular_function	GO:0042171	lysophosphatidic acid acyltransferase activity	1	2	0.5	0.917459	0.412336	1	1	A0A0D1DTF9_USTMA
cellular_component	GO:0005905	clathrin-coated pit	1	1	1	0.883311	0.47332	1	1	A0A0D1E2P1_USTMA
molecular_function	GO:0005545	1-phosphatidylinositol binding	1	1	1	1	0.100813	1	1	A0A0D1E2P1_USTMA
molecular_function	GO:0003726	double-stranded RNA adenosine deaminase activity	1	1	1	1	0.100813	1	1	A0A0D1BVX2_USTMA
biological_process	GO:0006382	adenosine to inosine editing	1	1	1	0.988859	0.200206	1	1	A0A0D1BVX2_USTMA
biological_process	GO:0048208	COPII vesicle coating	1	1	1	0.96892	0.284768	1	1	A0A0D1C766_USTMA
biological_process	GO:0070973	protein localization to endoplasmic reticulum exit site	1	2	0.5	0.988859	0.200206	1	1	A0A0D1C766_USTMA
biological_process	GO:0035020	regulation of Rac protein signal transduction	1	1	1	1	0.105674	1	1	A0A0D1E6N8_USTMA
molecular_function	GO:0008409	5'-3' exonuclease activity	0	5	0	0.278872	1	1	1
biological_process	GO:0006398	mRNA 3'-end processing by stem-loop binding and cleavage	0	2	0	0.799794	1	1	1
molecular_function	GO:0003755	peptidyl-prolyl cis-trans isomerase activity	0	17	0	0.16361	1	1	1
molecular_function	GO:0008160	protein tyrosine phosphatase activator activity	0	2	0	0.808514	1	1	1
biological_process	GO:0007052	mitotic spindle organization	0	10	0	0.61438	0.667244	1	1
cellular_component	GO:0000775	chromosome, centromeric region	0	6	0	0.79214	0.358044	1	1
cellular_component	GO:0000794	condensed nuclear chromosome	0	3	0	0.927807	0.26885	1	1
molecular_function	GO:1905334	Swi5-Sfr1 complex binding	0	1	0	0.899187	1	1	1
biological_process	GO:0070192	chromosome organization involved in meiotic cell cycle	0	2	0	0.939367	0.244737	1	1
biological_process	GO:1990918	double-strand break repair involved in meiotic recombination	0	1	0	0.894326	1	1	1
biological_process	GO:0007533	mating type switching	0	1	0	0.799794	1	1	1
biological_process	GO:0000708	meiotic strand invasion	0	1	0	0.894326	1	1	1
biological_process	GO:1990426	mitotic recombination-dependent replication fork processing	0	1	0	0.894326	1	1	1
biological_process	GO:0051260	protein homooligomerization	0	2	0	0.799794	1	1	1
biological_process	GO:0120290	stalled replication fork localization to nuclear periphery	0	1	0	0.894326	1	1	1
molecular_function	GO:0016818	hydrolase activity, acting on acid anhydrides, in phosphorus-containing anhydrides	0	3	0	0.383762	0.71453	1	1
molecular_function	GO:0031176	endo-1,4-beta-xylanase activity	0	3	0	0.726965	1	1	1
biological_process	GO:0045493	xylan catabolic process	0	4	0	0.63959	1	1	1
cellular_component	GO:0031261	DNA replication preinitiation complex	0	3	0	0.382084	1	1	1
biological_process	GO:0006270	DNA replication initiation	0	14	0	0.307571	0.914942	1	1
biological_process	GO:1902977	mitotic DNA replication preinitiation complex assembly	0	2	0	0.799794	1	1	1
biological_process	GO:0031938	obsolete regulation of chromatin silencing at telomere	0	1	0	0.715232	1	1	1
cellular_component	GO:0071819	DUBm complex	0	2	0	0.807662	1	1	1
molecular_function	GO:0003713	transcription coactivator activity	0	13	0	0.250674	1	1	1
biological_process	GO:0016578	histone deubiquitination	0	3	0	0.715232	1	1	1
cellular_component	GO:0032044	DSIF complex	0	2	0	0.807662	1	1	1
biological_process	GO:0032784	regulation of DNA-templated transcription, elongation	0	2	0	0.705102	0.581749	1	1
cellular_component	GO:0030896	checkpoint clamp complex	0	3	0	0.725817	1	1	1
molecular_function	GO:0008853	exodeoxyribonuclease III activity	0	1	0	0.899187	1	1	1
biological_process	GO:0000077	DNA damage checkpoint signaling	0	8	0	0.802967	0.415397	1	1
biological_process	GO:0016320	endoplasmic reticulum membrane fusion	0	1	0	0.894326	1	1	1
molecular_function	GO:0016018	cyclosporin A binding	0	4	0	0.653623	1	1	1
biological_process	GO:0000413	protein peptidyl-prolyl isomerization	0	11	0	0.292211	1	1	1
molecular_function	GO:0008474	palmitoyl-(protein) hydrolase activity	0	5	0	0.587664	1	1	1
biological_process	GO:0002084	protein depalmitoylation	0	3	0	0.715232	1	1	1
molecular_function	GO:0030620	U2 snRNA binding	0	2	0	0.808514	1	1	1
molecular_function	GO:0004751	ribose-5-phosphate isomerase activity	0	1	0	0.899187	1	1	1
biological_process	GO:0006014	D-ribose metabolic process	0	1	0	0.799794	1	1	1
biological_process	GO:0009052	pentose-phosphate shunt, non-oxidative branch	0	4	0	0.63959	1	1	1
biological_process	GO:0008615	pyridoxine biosynthetic process	0	3	0	0.715232	1	1	1
cellular_component	GO:0005749	mitochondrial respiratory chain complex II, succinate dehydrogenase complex (ubiquinone)	0	4	0	0.652247	1	1	1
molecular_function	GO:0051537	2 iron, 2 sulfur cluster binding	0	16	0	0.182034	1	1	1
molecular_function	GO:0051538	3 iron, 4 sulfur cluster binding	0	2	0	0.808514	1	1	1
molecular_function	GO:0009055	electron transfer activity	0	12	0	0.00657449	1	0.312	1
molecular_function	GO:0008177	succinate dehydrogenase (ubiquinone) activity	0	2	0	0.808514	1	1	1
biological_process	GO:0022904	respiratory electron transport chain	0	9	0	0.00999853	1	0.669	1
biological_process	GO:0006099	tricarboxylic acid cycle	0	22	0	0.0850576	1	1	1
cellular_component	GO:0071006	U2-type catalytic step 1 spliceosome	0	4	0	0.652247	1	1	1
molecular_function	GO:0036002	pre-mRNA binding	0	2	0	0.810789	0.572966	1	1
biological_process	GO:0008380	RNA splicing	0	16	0	0.767376	0.328216	1	1
biological_process	GO:0090114	COPII-coated vesicle budding	0	1	0	0.999451	0.00607998	1	0.942
biological_process	GO:0032008	positive regulation of TOR signaling	0	3	0	0.63959	1	1	1
biological_process	GO:1904263	positive regulation of TORC1 signaling	0	2	0	0.799794	1	1	1
biological_process	GO:0032527	protein exit from endoplasmic reticulum	0	1	0	0.990048	0.0897684	1	1
cellular_component	GO:0035101	FACT complex	0	2	0	0.807662	1	1	1
molecular_function	GO:0031491	nucleosome binding	0	6	0	0.427034	1	1	1
biological_process	GO:0006260	DNA replication	0	15	0	0.00887751	0.998272	0.623	1
biological_process	GO:0034724	DNA replication-independent chromatin organization	0	1	0	0.51141	1	1	1
molecular_function	GO:0004019	adenylosuccinate synthase activity	0	1	0	0.899187	1	1	1
biological_process	GO:0044208	'de novo' AMP biosynthetic process	0	2	0	0.799794	1	1	1
biological_process	GO:0046040	IMP metabolic process	0	1	0	0.26124	1	1	1
biological_process	GO:0097250	mitochondrial respirasome assembly	0	1	0	0.894326	1	1	1
[truncated: 3,338 more rows]
[truncated: 74 more columns]

[truncated: 20 more sheets: polyQ⁄N, polyN, polyY, polyW, polyC, polyP, polyA, polyS, polyT, polyD, polyE, polyG, polyF, polyH, polyI, polyL, polyV, polyM, polyR, polyK]
