# Supplementary material for: Noncanonical usage of stop codons in ciliates expands proteins with Q-rich motifs
Source: bioRxiv preprint, doi:10.1101/2020.12.08.407247, version 3 (2023-11-13)
Supplement: Dataset DS17 [file 407247_file31.xlsx]

## Sheet: SCD
GO domain	GO ID	GO term	SCD protein	total number	number / total	raw p-value under-representation	raw p-value over-representation	FWER under-representation	FWER over-representation	Gene Name
biological_process	GO:0019953	sexual reproduction	56	137	0.408759	1	3.15336e-07	1	0	PDI2_DICDI	MP05_DICDI	PKS16_DICDI	PSIM_DICDI	RACG_DICDI	GEFB_DICDI	Q54BT4_DICDI	Q556L9_DICDI	Q54U91_DICDI	Q54GM8_DICDI	Q54JJ9_DICDI	Q54X71_DICDI	Q54GR7_DICDI	Q86AX2_DICDI	Q54JT3_DICDI	Q54GR8_DICDI	Q55EH0_DICDI	Q550G2_DICDI	Q54F76_DICDI	Q54HK4_DICDI	Q54Z87_DICDI	Q54UR8_DICDI	Q869T4_DICDI	Q54K31_DICDI	Q869T3_DICDI	Q54F75_DICDI	Q54PE3_DICDI	Q55E84_DICDI	C7FZW2_DICDI	Q54P15_DICDI	Q55AN5_DICDI	Q54K04_DICDI	Q554H4_DICDI	Q8T282_DICDI	Q54ID9_DICDI	Q54MK6_DICDI	Q558J3_DICDI	B0M0Q0_DICDI	Q54RJ9_DICDI	Q55F41_DICDI
biological_process	GO:0006357	regulation of transcription by RNA polymerase II	52	126	0.412698	1	3.01137e-07	1	0	MED12_DICDI	BZPS_DICDI	BZPC_DICDI	HBX12_DICDI	MED13_DICDI	MED14_DICDI	BZPQ_DICDI	BZPR_DICDI	DIMA_DICDI	BZPJ_DICDI	BZPI_DICDI	GBF_DICDI	BZPP_DICDI	MED23_DICDI	HBX3_DICDI	MED26_DICDI	BZPK_DICDI	MED1_DICDI	STATB_DICDI	SRFD_DICDI	STATA_DICDI	SNF12_DICDI	MED4_DICDI	Y2556_DICDI	Y0777_DICDI	MYBP_DICDI	HBX4_DICDI	Q559I7_DICDI	Q553Y8_DICDI	Q86I20_DICDI	Q7KWP1_DICDI	Q55C32_DICDI	Q86KD2_DICDI	Q54DW3_DICDI	Q86H29_DICDI	Q55CZ5_DICDI	Q553J7_DICDI	Q54LF4_DICDI	Q54ET8_DICDI	Q54QK5_DICDI
biological_process	GO:0007165	signal transduction	52	165	0.315152	1	4.48358e-08	1	0	PDE5_DICDI	PKD1_DICDI	TAGB_DICDI	TIRA_DICDI	SPLA_DICDI	GACI_DICDI	GACM_DICDI	GACQ_DICDI	LIMKA_DICDI	GACT_DICDI	GACII_DICDI	KXCA_DICDI	GACK_DICDI	GBPC_DICDI	KINY_DICDI	GACZ_DICDI	GACG_DICDI	GACE_DICDI	CPAS2_DICDI	ROCO9_DICDI	PK4_DICDI	ROCO8_DICDI	ROCO6_DICDI	ROCO7_DICDI	MGP4_DICDI	ROC10_DICDI	ROCO5_DICDI	Y0133_DICDI	ROCO4_DICDI	PKS1_DICDI	YAKA_DICDI	Y9963_DICDI	Y9844_DICDI	Y1516_DICDI	Y0138_DICDI	Y9863_DICDI	Y1199_DICDI	Y0038_DICDI	GACL_DICDI	LIMKB_DICDI
biological_process	GO:0048870	cell motility	43	91	0.472527	1	1.17364e-06	1	0	PI3K2_DICDI	PI3K3_DICDI	SEC1_DICDI	FRMA_DICDI	FORH_DICDI	MED13_DICDI	CTNA_DICDI	ELMOD_DICDI	PAXB_DICDI	ELMOF_DICDI	PAKA_DICDI	TALB_DICDI	PLDC_DICDI	PKS30_DICDI	PTEN_DICDI	TGRB1_DICDI	PLDA_DICDI	Y1806_DICDI	PIRA_DICDI	NAPA_DICDI	RACG_DICDI	ABIA_DICDI	ACTNA_DICDI	MYOC_DICDI	MYOF_DICDI	DOKA_DICDI	GEFB_DICDI	ELMOE_DICDI	ABCGM_DICDI	DHKI_DICDI	Q54WI0_DICDI	Q557Q0_DICDI	Q553B4_DICDI	Q558Y3_DICDI	Q54PB7_DICDI	Q54DS6_DICDI	Q54Q49_DICDI	Q86KG9_DICDI	Q54CH3_DICDI	Q54P41_DICDI
biological_process	GO:0006355	regulation of transcription, DNA-templated	24	87	0.275862	1	3.88373e-10	1	0	GTAP_DICDI	GTAA_DICDI	GTAG_DICDI	GTAF_DICDI	TRA1_DICDI	VACC_DICDI	Y8013_DICDI	Y4797_DICDI	Y0170_DICDI	MYBAA_DICDI	MYBQ_DICDI	NFX1_DICDI	GTAN_DICDI	NFYC_DICDI	GTAO_DICDI	Q75JH1_DICDI	Q550R6_DICDI	Q54G53_DICDI	Q86A78_DICDI	Q54Y92_DICDI	Q55A48_DICDI	Q55AA8_DICDI	Q55F33_DICDI	Q54N06_DICDI
biological_process	GO:0006366	transcription by RNA polymerase II	15	39	0.384615	1	2.0671e-11	1	0	RPB2_DICDI	MED9_DICDI	RPB3_DICDI	MED28_DICDI	RPAB1_DICDI	TF2AA_DICDI	TF2B_DICDI	TF2H4_DICDI	MED16_DICDI	TF2H1_DICDI	MED15_DICDI	Q54VP8_DICDI	Q54DG0_DICDI	Q54Y92_DICDI	Q54LJ4_DICDI
biological_process	GO:0007049	cell cycle	12	41	0.292683	1	4.48026e-07	1	0	RBLA_DICDI	APC4_DICDI	KIF8_DICDI	CDH1_DICDI	APC2_DICDI	PMS1_DICDI	MLH1_DICDI	KIF10_DICDI	MCMBP_DICDI	ERK1_DICDI	BUB2_DICDI	Q54RU0_DICDI
biological_process	GO:0010468	regulation of gene expression	12	38	0.315789	1	3.75109e-10	1	0	ATG9_DICDI	MED13_DICDI	CYAD_DICDI	STATA_DICDI	YAKA_DICDI	Y7071_DICDI	CMF_DICDI	Q54Q16_DICDI	Q54QW6_DICDI	Q54CF8_DICDI	Q86J15_DICDI	Q95ZG5_DICDI
biological_process	GO:0000226	microtubule cytoskeleton organization	8	20	0.4	1	1.40741e-06	1	0	MTAA_DICDI	DC1L1_DICDI	KIF8_DICDI	Y6442_DICDI	DYIN_DICDI	Q54VM5_DICDI	Q54RX7_DICDI	Q54C01_DICDI
biological_process	GO:0007010	cytoskeleton organization	6	14	0.428571	1	5.6182e-07	1	0	STRP_DICDI	Q54WT5_DICDI	Q54CT2_DICDI	Q1ZX99_DICDI	Q54JI4_DICDI	Q55G27_DICDI
biological_process	GO:0006351	transcription, DNA-templated	4	10	0.4	1	1.84813e-12	1	0	GTAC_DICDI	SCAI_DICDI	Q54XU3_DICDI	Q54LF4_DICDI
biological_process	GO:0040011	locomotion	3	8	0.375	1	3.92279e-07	1	0	ATG9_DICDI	PAXB_DICDI	TALB_DICDI
biological_process	GO:0006996	organelle organization	1	3	0.333333	1	9.3486e-08	1	0	Q552X0_DICDI
biological_process	GO:0000003	reproduction	1	1	1	1	1.88338e-07	1	0	Q54LF4_DICDI
biological_process	GO:0016043	cellular component organization	0	1	0	0.999998	2.51249e-06	1	0.001
biological_process	GO:0080090	regulation of primary metabolic process	0	1	0	0.999998	3.15408e-06	1	0.001
biological_process	GO:0019438	aromatic compound biosynthetic process	2	8	0.25	0.999997	4.22428e-06	1	0.002	OMT9_DICDI	OMT10_DICDI
biological_process	GO:0007017	microtubule-based process	0	3	0	0.999999	3.90653e-06	1	0.002
biological_process	GO:0007052	mitotic spindle organization	9	14	0.642857	0.999999	6.61927e-06	1	0.003	MTAA_DICDI	SCAR_DICDI	ICPA_DICDI	MYOC_DICDI	KIF6_DICDI	DCTN2_DICDI	Q553N8_DICDI	Q54WM1_DICDI	Q7KWK7_DICDI
biological_process	GO:0000278	mitotic cell cycle	13	25	0.52	0.999995	9.44312e-06	1	0.005	PLK_DICDI	SPC97_DICDI	ICPA_DICDI	KIF4_DICDI	DYHC_DICDI	Y8646_DICDI	MYBAA_DICDI	MYBQ_DICDI	KIF9_DICDI	DPOE1_DICDI	DCTN2_DICDI	Q54BR8_DICDI	Q55FY5_DICDI
biological_process	GO:0030031	cell projection assembly	2	3	0.666667	0.999993	2.20456e-05	1	0.011	NAPA_DICDI	Q552K7_DICDI
biological_process	GO:0007051	spindle organization	1	1	1	0.999992	4.04251e-05	1	0.016	KIF13_DICDI
biological_process	GO:0035556	intracellular signal transduction	28	77	0.363636	0.999973	4.53281e-05	1	0.018	PAKB_DICDI	STK11_DICDI	FORE_DICDI	MRKA_DICDI	GXCDD_DICDI	CYAA_DICDI	PAKA_DICDI	PKGA_DICDI	PAKD_DICDI	ROCO8_DICDI	PTP3_DICDI	Y8078_DICDI	Y8646_DICDI	Y0701_DICDI	Y8013_DICDI	Y7165_DICDI	Y4613_DICDI	NDRC_DICDI	NDRD_DICDI	ERK1_DICDI	Q54XA7_DICDI	Q54DW4_DICDI	Q55DL8_DICDI	Q54VX2_DICDI	Q54WQ2_DICDI	Q1ZXN6_DICDI	Q54F64_DICDI	Q86A02_DICDI
biological_process	GO:0050658	RNA transport	0	1	0	0.999987	4.37207e-05	1	0.018
biological_process	GO:0051276	chromosome organization	2	3	0.666667	0.999969	5.60741e-05	1	0.029	Q55C32_DICDI	Q54Z42_DICDI
biological_process	GO:1902850	microtubule cytoskeleton organization involved in mitosis	0	1	0	0.999989	5.7011e-05	1	0.03
biological_process	GO:0051028	mRNA transport	6	10	0.6	0.999979	7.90578e-05	1	0.048	SEC13_DICDI	NUP54_DICDI	NUP98_DICDI	NCBP1_DICDI	XPO7_DICDI	Q75JH1_DICDI
biological_process	GO:0045893	positive regulation of transcription, DNA-templated	11	13	0.846154	0.999966	9.81871e-05	1	0.053	MRFA_DICDI	KU70_DICDI	STATB_DICDI	NUP85_DICDI	Y9218_DICDI	MED16_DICDI	DYRK1_DICDI	Q1ZXQ2_DICDI	Q54E54_DICDI	Q55CV3_DICDI	Q54JM6_DICDI
biological_process	GO:0007018	microtubule-based movement	14	19	0.736842	0.999981	0.000112209	1	0.067	KIF13_DICDI	KIF5_DICDI	DC1L1_DICDI	KIF4_DICDI	KIF8_DICDI	DYHC_DICDI	ARP10_DICDI	KIF6_DICDI	KIF9_DICDI	KIF1_DICDI	KIF2_DICDI	KIF10_DICDI	KIF11_DICDI	DYIN_DICDI
biological_process	GO:0007098	centrosome cycle	7	10	0.7	0.999984	0.000131833	1	0.075	LMNB1_DICDI	SUN1_DICDI	NEK2_DICDI	KIF9_DICDI	NDRC_DICDI	Q54NE5_DICDI	Q86A08_DICDI
biological_process	GO:0090307	mitotic spindle assembly	6	6	1	0.999992	0.000223279	1	0.13	KIF13_DICDI	KIF4_DICDI	DYHC_DICDI	KIF2_DICDI	Q54G01_DICDI	Q54NE5_DICDI
biological_process	GO:0030587	sorocarp development	63	194	0.324742	0.999805	0.000287823	1	0.154	PK2_DICDI	TAGB_DICDI	TPP1_DICDI	SPLA_DICDI	TS101_DICDI	LVSD_DICDI	MANA_DICDI	LMPA_DICDI	GACT_DICDI	DIMA_DICDI	CUPB_DICDI	CYAD_DICDI	DHKA_DICDI	GTAG_DICDI	GBF_DICDI	GXCDD_DICDI	CATB_DICDI	MED23_DICDI	TALA_DICDI	TALB_DICDI	RTOA_DICDI	OTU1_DICDI	SCAA_DICDI	STATA_DICDI	ROCO5_DICDI	YAKA_DICDI	UBPA_DICDI	Y1806_DICDI	Y7165_DICDI	RGAPB_DICDI	ABIA_DICDI	ABCA7_DICDI	ACTNA_DICDI	MYOG_DICDI	GPA5_DICDI	DTFA_DICDI	GEFL_DICDI	GEFQ_DICDI	ERK1_DICDI	ACTNB_DICDI
biological_process	GO:0099120	socially cooperative development	1	3	0.333333	0.999805	0.000287823	1	0.154	TGRB1_DICDI
biological_process	GO:0048285	organelle fission	2	2	1	0.999862	0.000311168	1	0.169	FTSZB_DICDI	FTSZA_DICDI
biological_process	GO:0016192	vesicle-mediated transport	18	76	0.236842	0.999743	0.000377725	1	0.177	SEC1_DICDI	AP4B_DICDI	SCFD1_DICDI	VPS11_DICDI	VPS16_DICDI	VPS45_DICDI	AP1B_DICDI	Q55AA6_DICDI	Q552I9_DICDI	Q55CS3_DICDI	Q54VS5_DICDI	Q54JP0_DICDI	Q54T42_DICDI	Q54ZW8_DICDI	Q54W41_DICDI	Q54Y34_DICDI	Q55AI4_DICDI	Q55FG6_DICDI
biological_process	GO:0006405	RNA export from nucleus	4	7	0.571429	0.999886	0.000398202	1	0.179	NUPL_DICDI	XPO5_DICDI	Q54F20_DICDI	Q54LU2_DICDI
biological_process	GO:0048312	intracellular distribution of mitochondria	10	15	0.666667	0.999948	0.000398627	1	0.186	DYNA_DICDI	CLU_DICDI	Q75JJ2_DICDI	Q75JR6_DICDI	Q54YP3_DICDI	Q54ZA9_DICDI	Q75JJ3_DICDI	Q54SB7_DICDI	Q54JI4_DICDI	Q54T92_DICDI
biological_process	GO:0042147	retrograde transport, endosome to Golgi	15	29	0.517241	0.999872	0.0005041	1	0.208	Y5795_DICDI	Q76NU4_DICDI	Q553Q7_DICDI	Q54U23_DICDI	Q54BQ6_DICDI	Q86HF6_DICDI	Q86IF6_DICDI	Q55AJ1_DICDI	Q54YR7_DICDI	Q54WR7_DICDI	Q54NV0_DICDI	Q54MU4_DICDI	Q54TJ5_DICDI	Q54MJ6_DICDI	Q559A5_DICDI
biological_process	GO:0031589	cell-substrate adhesion	15	31	0.483871	0.999821	0.000596102	1	0.232	SCAR_DICDI	IFKA_DICDI	FORH_DICDI	IFKB_DICDI	COROB_DICDI	GBPC_DICDI	PAXB_DICDI	TALA_DICDI	TALB_DICDI	SADA_DICDI	NAPA_DICDI	RGAP1_DICDI	RGAPB_DICDI	MYOI_DICDI	GBPD_DICDI
biological_process	GO:0006887	exocytosis	16	40	0.4	0.999723	0.000724196	1	0.322	SCAR_DICDI	LVSB_DICDI	EXOC8_DICDI	EXOC3_DICDI	EXOC1_DICDI	EXOC5_DICDI	RTOA_DICDI	EXOC6_DICDI	WASC3_DICDI	WASC5_DICDI	WASC4_DICDI	WASH1_DICDI	Q54RR0_DICDI	Q54WI0_DICDI	Q55DR2_DICDI	Q54HM5_DICDI
biological_process	GO:0046907	intracellular transport	0	4	0	0.999462	0.000785954	1	0.339
biological_process	GO:0000280	nuclear division	0	1	0	0.999612	0.000855818	1	0.417
biological_process	GO:0051301	cell division	24	61	0.393443	0.999487	0.000919374	1	0.428	FTSZB_DICDI	KIF13_DICDI	APC4_DICDI	KIF4_DICDI	KIF8_DICDI	CDH1_DICDI	DNLI1_DICDI	APC2_DICDI	FTSZA_DICDI	SMC3_DICDI	SMC4_DICDI	SUN1_DICDI	SMC2_DICDI	PDS5_DICDI	APC3_DICDI	KIF10_DICDI	MCMBP_DICDI	CDC16_DICDI	ERK1_DICDI	BUB2_DICDI	Q86I09_DICDI	Q55CA1_DICDI	Q54WM1_DICDI	Q54QB4_DICDI
biological_process	GO:0006935	chemotaxis	17	56	0.303571	0.999409	0.00104061	1	0.439	PI3K2_DICDI	MED13_DICDI	HD_DICDI	IPLA_DICDI	DIMA_DICDI	PAKA_DICDI	PTEN_DICDI	YAKA_DICDI	Q86KX8_DICDI	Q54WK8_DICDI	Q551V8_DICDI	Q54C97_DICDI	Q54WK9_DICDI	Q54SZ1_DICDI	Q54WL0_DICDI	Q55BY2_DICDI	Q553W5_DICDI
biological_process	GO:0032060	bleb assembly	10	18	0.555556	0.999784	0.00113221	1	0.452	PI3K2_DICDI	PI3K3_DICDI	PK2_DICDI	SCAR_DICDI	LVSA_DICDI	IPLA_DICDI	GBPC_DICDI	PTEN_DICDI	GBPD_DICDI	GEFB_DICDI
biological_process	GO:0046856	phosphatidylinositol dephosphorylation	13	25	0.52	0.99962	0.00155372	1	0.518	MTMR_DICDI	PATS1_DICDI	PTEN_DICDI	Q54YC2_DICDI	Q553B4_DICDI	Q54C52_DICDI	Q54FY6_DICDI	Q55AZ2_DICDI	Q54W40_DICDI	Q55E04_DICDI	Q54CH3_DICDI	Q54PT8_DICDI	Q54D97_DICDI
biological_process	GO:0048193	Golgi vesicle transport	0	3	0	0.99923	0.00156628	1	0.521
biological_process	GO:0048311	mitochondrion distribution	0	1	0	0.999704	0.00162572	1	0.562
biological_process	GO:0043327	chemotaxis to cAMP	37	100	0.37	0.999126	0.00174507	1	0.578	PI3K2_DICDI	PDE5_DICDI	PK2_DICDI	SCAR_DICDI	TORA_DICDI	HD_DICDI	PAXB_DICDI	MPL1_DICDI	PI4K_DICDI	PAKA_DICDI	RIP3_DICDI	PAKD_DICDI	SCAA_DICDI	PKS1_DICDI	PTEN_DICDI	Y1806_DICDI	TSUA_DICDI	MYOC_DICDI	MYOF_DICDI	MYOG_DICDI	GEFM_DICDI	ELMOE_DICDI	ERK1_DICDI	DHKI_DICDI	Q557I6_DICDI	Q1ZXJ2_DICDI	Q54Q16_DICDI	Q54HV0_DICDI	Q551V8_DICDI	Q86L18_DICDI	Q54RC0_DICDI	Q55DL8_DICDI	Q54CF8_DICDI	Q7KWP7_DICDI	Q54RA9_DICDI	Q54BP1_DICDI	Q54CA8_DICDI
biological_process	GO:0006406	mRNA export from nucleus	12	21	0.571429	0.999496	0.00176562	1	0.578	NUP85_DICDI	Y2175_DICDI	Y3534_DICDI	AAC3_DICDI	GLE1_DICDI	Q54JG6_DICDI	Q552T7_DICDI	Q86IW7_DICDI	Q54YK3_DICDI	Q1ZXD7_DICDI	Q54F78_DICDI	Q54N06_DICDI
biological_process	GO:0007032	endosome organization	9	15	0.6	0.999573	0.00199436	1	0.615	LVSA_DICDI	VPS11_DICDI	WASC5_DICDI	Y5795_DICDI	WASC4_DICDI	DYNA_DICDI	Q553Q7_DICDI	Q55CS3_DICDI	Q54LZ3_DICDI
biological_process	GO:0007059	chromosome segregation	6	16	0.375	0.998999	0.00214165	1	0.65	SAMKC_DICDI	ICPA_DICDI	SMC4_DICDI	NEK2_DICDI	Q54WQ2_DICDI	Q86A08_DICDI
biological_process	GO:0034504	protein localization to nucleus	1	2	0.5	0.999128	0.00244747	1	0.689	PTP3_DICDI
biological_process	GO:0030036	actin cytoskeleton organization	9	33	0.272727	0.99827	0.00271559	1	0.715	PI3K2_DICDI	SCAR_DICDI	FRMA_DICDI	ACTNA_DICDI	MYOC_DICDI	GEFL_DICDI	Q54WI0_DICDI	Q54QH4_DICDI	Q54DW4_DICDI
biological_process	GO:0043087	regulation of GTPase activity	15	34	0.441176	0.998606	0.00277877	1	0.757	GACI_DICDI	GACQ_DICDI	GACT_DICDI	GACE_DICDI	Y1806_DICDI	RACG_DICDI	Q869U6_DICDI	Q55CR5_DICDI	Q86B03_DICDI	Q54UJ4_DICDI	Q54Q13_DICDI	Q54F48_DICDI	Q552W4_DICDI	Q8SSU4_DICDI	Q54MM9_DICDI
biological_process	GO:0045595	regulation of cell differentiation	6	9	0.666667	0.99888	0.00282308	1	0.757	TAGA_DICDI	MKCA_DICDI	GTAA_DICDI	DIMA_DICDI	FBXA_DICDI	RTOA_DICDI
biological_process	GO:0090435	protein localization to nuclear envelope	1	1	1	1	0.0028508	1	0.847	Q54BP1_DICDI
biological_process	GO:0044655	phagosome reneutralization	5	6	0.833333	0.999848	0.00318819	1	0.884	LMPA_DICDI	WASC3_DICDI	WASC5_DICDI	WASC4_DICDI	WASH1_DICDI
biological_process	GO:0070060	'de novo' actin filament nucleation	5	6	0.833333	0.999848	0.00318819	1	0.884	FORA_DICDI	FORE_DICDI	FORH_DICDI	FORB_DICDI	FORF_DICDI
biological_process	GO:0034244	negative regulation of transcription elongation from RNA polymerase II promoter	5	6	0.833333	0.999848	0.00318819	1	0.884	MED15_DICDI	Q54LZ1_DICDI	Q55FN0_DICDI	Q54Q08_DICDI	Q75JP0_DICDI
biological_process	GO:0006999	nuclear pore organization	4	5	0.8	0.999848	0.00318819	1	0.884	NUP54_DICDI	Q75JH1_DICDI	Q54XC5_DICDI	Q556V5_DICDI
biological_process	GO:0051225	spindle assembly	1	5	0.2	0.999474	0.00332567	1	0.893	SPC97_DICDI
biological_process	GO:0000819	sister chromatid segregation	1	2	0.5	0.998567	0.00345	1	0.894	TOP2M_DICDI
biological_process	GO:0009991	response to extracellular stimulus	0	1	0	0.997438	0.00403396	1	0.902
biological_process	GO:0000070	mitotic sister chromatid segregation	2	6	0.333333	0.997871	0.0051499	1	0.927	SMC4_DICDI	SUN1_DICDI
biological_process	GO:0006913	nucleocytoplasmic transport	0	3	0	0.997347	0.00532401	1	0.934
biological_process	GO:0006281	DNA repair	27	73	0.369863	0.996543	0.00547324	1	0.938	RECAM_DICDI	RFC3_DICDI	DOT1L_DICDI	DNLI1_DICDI	PRP19_DICDI	SMC6_DICDI	RFC4_DICDI	TRA1_DICDI	PDS5_DICDI	IN80D_DICDI	TF2H1_DICDI	RAD50_DICDI	ATR1_DICDI	Q54D34_DICDI	Q55AZ3_DICDI	Q54TE8_DICDI	Q54DG0_DICDI	Q55FJ4_DICDI	Q55E62_DICDI	Q54IH7_DICDI	Q55FY5_DICDI	Q54T56_DICDI	Q54KW8_DICDI	Q54Z42_DICDI	Q54BR4_DICDI	Q86IV6_DICDI	B0G0Y4_DICDI
biological_process	GO:0030866	cortical actin cytoskeleton organization	9	21	0.428571	0.998446	0.00547883	1	0.939	SCAR_DICDI	FORA_DICDI	FORE_DICDI	FORG_DICDI	FORH_DICDI	FORC_DICDI	COROB_DICDI	NAPA_DICDI	GEFB_DICDI
biological_process	GO:0046847	filopodium assembly	9	17	0.529412	0.998446	0.00547883	1	0.939	FORH_DICDI	LIMCH_DICDI	PIRA_DICDI	NAPA_DICDI	RACG_DICDI	ABIA_DICDI	MYOC_DICDI	MYOI_DICDI	Q54CA8_DICDI
biological_process	GO:0046839	phospholipid dephosphorylation	0	3	0	0.998317	0.00553935	1	0.94
biological_process	GO:0016070	RNA metabolic process	0	6	0	0.995399	0.00580095	1	0.941
biological_process	GO:0006013	mannose metabolic process	6	9	0.666667	0.999197	0.00660832	1	0.957	MANA_DICDI	MANC_DICDI	MAND_DICDI	MANF_DICDI	MANE_DICDI	MANG_DICDI
biological_process	GO:0031122	cytoplasmic microtubule organization	5	8	0.625	0.999197	0.00660832	1	0.957	SPC97_DICDI	KIF8_DICDI	DYHC_DICDI	HOOK_DICDI	KIF10_DICDI
biological_process	GO:0034613	cellular protein localization	1	6	0.166667	0.995164	0.00674294	1	0.957	Y1625_DICDI
biological_process	GO:0016197	endosomal transport	5	13	0.384615	0.996485	0.00748612	1	0.964	WASC4_DICDI	VPS16_DICDI	EPS15_DICDI	BL1S2_DICDI	Q54SJ9_DICDI
biological_process	GO:0000077	DNA damage checkpoint signaling	6	13	0.461538	0.997731	0.00802599	1	0.975	DOT1L_DICDI	IFKB_DICDI	IFKC_DICDI	ATR1_DICDI	Q54D34_DICDI	Q55E62_DICDI
biological_process	GO:0110094	polyphosphate-mediated signaling	5	7	0.714286	0.999148	0.00902867	1	0.991	PK2_DICDI	GRLD_DICDI	PAKD_DICDI	NAPA_DICDI	ERK1_DICDI
biological_process	GO:0090110	COPII-coated vesicle cargo loading	5	7	0.714286	0.999148	0.00902867	1	0.991	SEC24_DICDI	SEC31_DICDI	Q54DB3_DICDI	Q54SU8_DICDI	Q54Z72_DICDI
biological_process	GO:0051298	centrosome duplication	3	3	1	0.999148	0.00902867	1	0.991	MTAA_DICDI	DYIN_DICDI	Q7KWK7_DICDI
biological_process	GO:0090114	COPII-coated vesicle budding	1	1	1	0.998397	0.00907665	1	0.991	SEC13_DICDI
biological_process	GO:0006606	protein import into nucleus	12	30	0.4	0.996377	0.00946961	1	0.993	SEC13_DICDI	IPO7_DICDI	IPO5_DICDI	IP13A_DICDI	NUPL_DICDI	NUP85_DICDI	XPO2_DICDI	Q54JG6_DICDI	Q54F20_DICDI	Q54KA3_DICDI	Q55BW3_DICDI	Q54N06_DICDI
biological_process	GO:0008104	protein localization	7	14	0.5	0.99274	0.00964521	1	0.993	LVSA_DICDI	LVSB_DICDI	LVSC_DICDI	LVSD_DICDI	ICPA_DICDI	EXOC8_DICDI	Q54U23_DICDI
biological_process	GO:0006633	fatty acid biosynthetic process	23	50	0.46	0.994471	0.0112772	1	0.995	PKS5_DICDI	PKS28_DICDI	PKS44_DICDI	PKS8_DICDI	PKS7_DICDI	PKS10_DICDI	PKS25_DICDI	PKS38_DICDI	PKS16_DICDI	PKS31_DICDI	PKS30_DICDI	PKS24_DICDI	PKS1_DICDI	PKS33_DICDI	PKS32_DICDI	PKS29_DICDI	PKS2_DICDI	PKS9_DICDI	PKS39_DICDI	PKS18_DICDI	PKS34_DICDI	PKS6_DICDI	Q54HD3_DICDI
biological_process	GO:0051056	regulation of small GTPase mediated signal transduction	8	11	0.727273	0.995528	0.010735	1	0.995	Y1809_DICDI	Y1806_DICDI	RGAP1_DICDI	RGAPB_DICDI	Q54P30_DICDI	Q54VB2_DICDI	Q869V0_DICDI	Q54RS9_DICDI
biological_process	GO:0050790	regulation of catalytic activity	2	11	0.181818	0.992819	0.011079	1	0.995	Y1625_DICDI	Q55FG6_DICDI
biological_process	GO:0000723	telomere maintenance	6	12	0.5	0.997094	0.0114577	1	0.996	KU70_DICDI	PRKDC_DICDI	ATR1_DICDI	Q55FJ4_DICDI	Q54BN2_DICDI	Q54Z42_DICDI
biological_process	GO:0006900	vesicle budding from membrane	1	5	0.2	0.997094	0.0114577	1	0.996	Q54Y50_DICDI
biological_process	GO:0031152	aggregation involved in sorocarp development	42	130	0.323077	0.986349	0.0211383	1	1	PDE5_DICDI	PAKB_DICDI	TORA_DICDI	SET1_DICDI	ATG9_DICDI	IFKA_DICDI	GTAC_DICDI	GRLB_DICDI	MED13_DICDI	IPLA_DICDI	ADCB_DICDI	GXCDD_DICDI	PI4K_DICDI	CYAA_DICDI	PAKA_DICDI	RIP3_DICDI	PAKD_DICDI	SCAA_DICDI	PKS1_DICDI	PTEN_DICDI	YAKA_DICDI	TGRB1_DICDI	Y7071_DICDI	ABCG2_DICDI	ABCGG_DICDI	ABCGB_DICDI	ABCGL_DICDI	MYOF_DICDI	ABCF2_DICDI	ABCGE_DICDI	ABCGH_DICDI	AP1B_DICDI	CLH_DICDI	GEFB_DICDI	ERK1_DICDI	ABCGM_DICDI	CMF_DICDI	Q557I6_DICDI	Q55AA6_DICDI	Q86AD8_DICDI
biological_process	GO:0006886	intracellular protein transport	41	148	0.277027	0.963067	0.0492849	1	1	RAB24_DICDI	RABC_DICDI	SEC1_DICDI	SEC24_DICDI	COPA_DICDI	AP4B_DICDI	AP2A2_DICDI	CPAS2_DICDI	COG7_DICDI	SCFD1_DICDI	COG3_DICDI	EXOC6_DICDI	SEC31_DICDI	VPS11_DICDI	TBC5B_DICDI	VPS16_DICDI	TBC5A_DICDI	VPS45_DICDI	YETL_DICDI	RB32C_DICDI	AP1B_DICDI	AP1G_DICDI	CLH_DICDI	COPB2_DICDI	BUB2_DICDI	Q552I9_DICDI	Q55CS3_DICDI	Q54T42_DICDI	Q54WP7_DICDI	Q54WR7_DICDI	Q54ZW8_DICDI	Q55DR2_DICDI	Q54Z72_DICDI	Q54HM5_DICDI	Q54Y34_DICDI	Q54KE5_DICDI	Q54H32_DICDI	Q54RA7_DICDI	Q54LP6_DICDI	Q553R1_DICDI
biological_process	GO:0000281	mitotic cytokinesis	30	101	0.29703	0.969561	0.0490049	1	1	DLPB_DICDI	MTAA_DICDI	PAKB_DICDI	SCAR_DICDI	LVSA_DICDI	LMPA_DICDI	ICPA_DICDI	PAXB_DICDI	PAKA_DICDI	TALA_DICDI	SADA_DICDI	PATS1_DICDI	SUN2_DICDI	PTEN_DICDI	PIRA_DICDI	NAPA_DICDI	RACG_DICDI	ABIA_DICDI	NDRC_DICDI	HBX4_DICDI	DTFA_DICDI	AP1B_DICDI	CLU_DICDI	CLH_DICDI	Q54WI0_DICDI	Q54VM5_DICDI	Q55DL8_DICDI	C7FZZ0_DICDI	Q86A08_DICDI	Q54CA8_DICDI
biological_process	GO:0015031	protein transport	25	103	0.242718	0.908937	0.111762	1	1	TS101_DICDI	COG4_DICDI	EXOC8_DICDI	EXOC3_DICDI	COPD_DICDI	ADCB_DICDI	EXOC1_DICDI	EXOC5_DICDI	COG8_DICDI	NUP98_DICDI	ATG18_DICDI	ATG4_DICDI	EPS15_DICDI	CM2A2_DICDI	GLE1_DICDI	Q54JM8_DICDI	Q54BQ6_DICDI	Q86HF6_DICDI	Q55BR0_DICDI	Q54XV4_DICDI	Q54DQ9_DICDI	Q559A5_DICDI	Q55BA7_DICDI	Q54C68_DICDI	Q54SJ9_DICDI
biological_process	GO:0006909	phagocytosis	23	84	0.27381	0.613576	0.461231	1	1	PAKB_DICDI	SCAR_DICDI	TPP1_DICDI	LVSA_DICDI	ATG9_DICDI	COROB_DICDI	LIMCH_DICDI	PAKA_DICDI	TALA_DICDI	SIBC_DICDI	SADA_DICDI	NICA_DICDI	WASC5_DICDI	NRAM1_DICDI	RACG_DICDI	ACTNA_DICDI	MYOC_DICDI	MYOI_DICDI	DYNA_DICDI	GEFB_DICDI	Q54QH4_DICDI	C7FZZ0_DICDI	Q86KG9_DICDI
biological_process	GO:0031288	sorocarp morphogenesis	23	80	0.2875	0.868172	0.191675	1	1	PK2_DICDI	SCAR_DICDI	ATG9_DICDI	FRMA_DICDI	BZPR_DICDI	CYAD_DICDI	DHKA_DICDI	DHKD_DICDI	RIR1_DICDI	ABCAA_DICDI	ABCG2_DICDI	ABCGG_DICDI	ABCGB_DICDI	DHKB_DICDI	ABCA4_DICDI	ABCA9_DICDI	ABCGL_DICDI	DYNA_DICDI	ABCF2_DICDI	ABCGE_DICDI	ABCGH_DICDI	ABCD2_DICDI	ABCGM_DICDI
biological_process	GO:0007015	actin filament organization	21	63	0.333333	0.987358	0.019202	1	1	DLPB_DICDI	COROB_DICDI	ELMOD_DICDI	ELMOF_DICDI	CYAA_DICDI	SADA_DICDI	RACG_DICDI	RGAPB_DICDI	MYOC_DICDI	MYOF_DICDI	MYOG_DICDI	MYOI_DICDI	MYOJ_DICDI	DYNA_DICDI	GEFB_DICDI	ELMOE_DICDI	Q1ZXE9_DICDI	Q54NW3_DICDI	Q54QH4_DICDI	Q7KWP7_DICDI	Q54K01_DICDI
biological_process	GO:0006468	protein phosphorylation	21	77	0.272727	0.971908	0.0409123	1	1	PK2_DICDI	PAKB_DICDI	STK11_DICDI	IFKA_DICDI	IFKB_DICDI	DHKA_DICDI	PAKA_DICDI	MHCKD_DICDI	PAKD_DICDI	TRA1_DICDI	YAKA_DICDI	PRKDC_DICDI	Y0111_DICDI	Y7165_DICDI	Y2550_DICDI	TSUA_DICDI	Y2354_DICDI	ATR1_DICDI	NEK2_DICDI	AK1_DICDI	ERK1_DICDI
biological_process	GO:0016567	protein ubiquitination	20	87	0.229885	0.233092	0.824379	1	1	CDH1_DICDI	APC2_DICDI	CUL2_DICDI	UBA1_DICDI	Y3893_DICDI	APC3_DICDI	CDC16_DICDI	Q557I6_DICDI	Q55DZ2_DICDI	Q54QZ3_DICDI	Q55E19_DICDI	C7G034_DICDI	Q54PF2_DICDI	Q54RD2_DICDI	Q554L0_DICDI	Q54RC2_DICDI	Q55DJ2_DICDI	Q54IW6_DICDI	Q54TM9_DICDI	Q557D0_DICDI
biological_process	GO:0006511	ubiquitin-dependent protein catabolic process	19	86	0.22093	0.672355	0.387327	1	1	RBRA_DICDI	FBXA_DICDI	PSA6_DICDI	PSD13_DICDI	UBPA_DICDI	PSMD3_DICDI	PSA4_DICDI	UBPB_DICDI	PSA1_DICDI	UBA1_DICDI	Q54BB6_DICDI	Q86J16_DICDI	B0G199_DICDI	Q54ND8_DICDI	Q54DM8_DICDI	Q553T4_DICDI	Q54DT4_DICDI	Q55CB4_DICDI	Q55EJ1_DICDI
biological_process	GO:0007264	small GTPase mediated signal transduction	18	65	0.276923	0.909422	0.127566	1	1	GBPC_DICDI	RACG_DICDI	GBPD_DICDI	GEFC_DICDI	GEFE_DICDI	GEFF_DICDI	GEFI_DICDI	GEFL_DICDI	GEFM_DICDI	GEFN_DICDI	GEFO_DICDI	GEFW_DICDI	GEFY_DICDI	Q54XL4_DICDI	Q554I8_DICDI	Q54PB7_DICDI	Q54DS6_DICDI	Q54CA8_DICDI
biological_process	GO:0006907	pinocytosis	17	57	0.298246	0.978129	0.037621	1	1	PAKB_DICDI	SCAR_DICDI	LVSA_DICDI	ATG9_DICDI	G13A_DICDI	G13B_DICDI	MYOC_DICDI	DYNA_DICDI	CLH_DICDI	Q54GA1_DICDI	Q1ZXL3_DICDI	Q54TD1_DICDI	Q55G51_DICDI	Q54WV8_DICDI	Q552I0_DICDI	Q1ZXR1_DICDI	O96070_DICDI
biological_process	GO:0031154	culmination involved in sorocarp development	17	83	0.204819	0.932403	0.0940145	1	1	LVSB_DICDI	EXPL7_DICDI	FORC_DICDI	FBXA_DICDI	PAXB_DICDI	RTOA_DICDI	STATA_DICDI	SUN2_DICDI	VP13C_DICDI	ABCGG_DICDI	ABCC2_DICDI	Q54Q16_DICDI	Q54Y53_DICDI	Q55FE6_DICDI	Q54Q13_DICDI	Q54T92_DICDI	Q86M88_DICDI
biological_process	GO:0030041	actin filament polymerization	17	41	0.414634	0.898729	0.147957	1	1	FORA_DICDI	FORE_DICDI	FORH_DICDI	FORB_DICDI	CTNA_DICDI	FORF_DICDI	PAKD_DICDI	PTEN_DICDI	WASC3_DICDI	WASC5_DICDI	WASC4_DICDI	WASH1_DICDI	MYOF_DICDI	MYOG_DICDI	ELMOE_DICDI	C7FZZ0_DICDI	Q54PB7_DICDI
biological_process	GO:0018105	peptidyl-serine phosphorylation	15	40	0.375	0.993306	0.0161683	1	1	PK2_DICDI	PKD1_DICDI	PK3_DICDI	PKGA_DICDI	PK4_DICDI	YAKA_DICDI	Y0701_DICDI	Y0444_DICDI	Y3337_DICDI	Y2354_DICDI	NDRC_DICDI	NDRD_DICDI	DYRK1_DICDI	Q54WT0_DICDI	Q54WQ2_DICDI
biological_process	GO:0090630	activation of GTPase activity	15	51	0.294118	0.88955	0.181799	1	1	SCAR_DICDI	Y1806_DICDI	TBC5B_DICDI	TBC5A_DICDI	RGAP1_DICDI	RGAPB_DICDI	GEFE_DICDI	BUB2_DICDI	Q54WP7_DICDI	Q54DW4_DICDI	Q54KE5_DICDI	Q54H32_DICDI	Q869V0_DICDI	Q54RA7_DICDI	Q54RS9_DICDI
biological_process	GO:0006508	proteolysis	15	59	0.254237	0.342122	0.703054	1	1	TAGA_DICDI	TAGC_DICDI	TPP1_DICDI	PSA6_DICDI	NICA_DICDI	Y1952_DICDI	PSA4_DICDI	PSA1_DICDI	ATG4_DICDI	C7G061_DICDI	Q54MN6_DICDI	Q86AG5_DICDI	Q54TD0_DICDI	Q555E5_DICDI	Q54RM4_DICDI
biological_process	GO:0009617	response to bacterium	14	95	0.147368	0.0472641	0.970847	1	1	PI3K2_DICDI	PI3K3_DICDI	PDI2_DICDI	ATG9_DICDI	COROB_DICDI	EIF3D_DICDI	VACC_DICDI	NRAM1_DICDI	DYNA_DICDI	Q54WI0_DICDI	Q54WC4_DICDI	Q54TD1_DICDI	Q55DN5_DICDI	Q54F55_DICDI
biological_process	GO:0006325	chromatin organization	14	35	0.4	0.934297	0.0929533	1	1	RBLA_DICDI	FAM50_DICDI	BRE1_DICDI	SNF12_DICDI	HDA21_DICDI	HDA22_DICDI	Q559I7_DICDI	Q54IW7_DICDI	Q54SJ6_DICDI	Q55A48_DICDI	Q54VX6_DICDI	Q54FH5_DICDI	Q54QM3_DICDI	Q54JM6_DICDI
biological_process	GO:0030435	sporulation resulting in formation of a cellular spore	13	76	0.171053	0.128968	0.921499	1	1	RBRA_DICDI	SPLA_DICDI	SP85_DICDI	MKCA_DICDI	DIMA_DICDI	CYAD_DICDI	DHKA_DICDI	FBXA_DICDI	CYAA_DICDI	SP96_DICDI	IPT_DICDI	DOKA_DICDI	CLH_DICDI
biological_process	GO:0006364	rRNA processing	13	72	0.180556	0.000505422	0.999774	0.125	1	MDN1_DICDI	NOL9_DICDI	NOP56_DICDI	PWP2_DICDI	HEAT1_DICDI	DDX17_DICDI	Q54XB2_DICDI	Q54X98_DICDI	Q54BS1_DICDI	Q55GQ7_DICDI	Q54WV7_DICDI	Q54K79_DICDI	Q54BV0_DICDI
biological_process	GO:0000398	mRNA splicing, via spliceosome	13	88	0.147727	0.0430876	0.974803	1	1	PRP19_DICDI	SF3A1_DICDI	NCBP1_DICDI	Y8236_DICDI	DDX46_DICDI	DDX41_DICDI	Q54B40_DICDI	Q555Z2_DICDI	Q54MH4_DICDI	Q54BJ4_DICDI	Q54X23_DICDI	Q55EN0_DICDI	Q55BV8_DICDI
biological_process	GO:0006397	mRNA processing	13	39	0.333333	0.362414	0.702695	1	1	DHX16_DICDI	IRLA_DICDI	IRLF_DICDI	PAN3_DICDI	PAP1A_DICDI	PAP1B_DICDI	PRP8_DICDI	YME2_DICDI	IRLD_DICDI	Q54F78_DICDI	Q553T2_DICDI	Q54YS7_DICDI	Q54LG7_DICDI
biological_process	GO:0015074	DNA integration	13	50	0.26	0.748279	0.366246	1	1	Q54AM8_DICDI	Q54CG2_DICDI	Q54DH3_DICDI	Q54T33_DICDI	Q55EV9_DICDI	Q55BL0_DICDI	Q54SM6_DICDI	Q551E2_DICDI	Q54P84_DICDI	Q555A8_DICDI	Q54KU6_DICDI	Q54RK3_DICDI	Q54DC4_DICDI
biological_process	GO:0010628	positive regulation of gene expression	12	51	0.235294	0.484042	0.630051	1	1	RBLA_DICDI	HD_DICDI	GTAG_DICDI	MED23_DICDI	CYAA_DICDI	STATA_DICDI	PKS1_DICDI	YAKA_DICDI	UBPA_DICDI	Q86AD8_DICDI	Q54T56_DICDI	O15755_DICDI
biological_process	GO:0006888	endoplasmic reticulum to Golgi vesicle-mediated transport	12	46	0.26087	0.964305	0.0661096	1	1	SEC13_DICDI	COPA_DICDI	COPD_DICDI	SCFD1_DICDI	SEC31_DICDI	YETL_DICDI	COPB2_DICDI	Q55CA1_DICDI	Q54XV4_DICDI	Q8T2J5_DICDI	Q553R1_DICDI	Q556P7_DICDI
biological_process	GO:0045944	positive regulation of transcription by RNA polymerase II	12	34	0.352941	0.935401	0.118353	1	1	SRFD_DICDI	Y6505_DICDI	MYBAA_DICDI	MYBQ_DICDI	Q54L49_DICDI	Q54SJ6_DICDI	Q55C32_DICDI	Q86KB4_DICDI	Q54C05_DICDI	Q54VV1_DICDI	Q55BD4_DICDI	Q54TZ0_DICDI
biological_process	GO:0019954	asexual reproduction	11	42	0.261905	0.90157	0.154403	1	1	PI3K2_DICDI	TPP1_DICDI	TIRA_DICDI	ATG9_DICDI	ERK1_DICDI	Q54RC0_DICDI	Q86AD8_DICDI	Q54G01_DICDI	Q55DL8_DICDI	Q54CF8_DICDI	Q54BP1_DICDI
biological_process	GO:1903013	response to differentiation-inducing factor 1	11	33	0.333333	0.926592	0.141671	1	1	PK2_DICDI	DIMA_DICDI	GACG_DICDI	PAKA_DICDI	MHCKD_DICDI	PTP3_DICDI	Y1806_DICDI	GEFE_DICDI	GEFN_DICDI	ELMOE_DICDI	Q54RC0_DICDI
biological_process	GO:0006310	DNA recombination	11	50	0.22	0.71507	0.360435	1	1	RECAM_DICDI	MSH3_DICDI	DNLI1_DICDI	KU70_DICDI	IN80D_DICDI	RAD50_DICDI	Q55FJ4_DICDI	Q54QN3_DICDI	Q54T56_DICDI	Q54Z42_DICDI	B0G0Y4_DICDI
biological_process	GO:0030433	ubiquitin-dependent ERAD pathway	11	36	0.305556	0.873592	0.219268	1	1	OTU1_DICDI	Y5729_DICDI	Q55E19_DICDI	Q54SX5_DICDI	Q55DT6_DICDI	Q54U33_DICDI	Q54TF9_DICDI	Q55C65_DICDI	Q54RC2_DICDI	Q55DJ2_DICDI	Q54QA5_DICDI
biological_process	GO:0016579	protein deubiquitination	11	32	0.34375	0.986621	0.0312419	1	1	OTU1_DICDI	UBPA_DICDI	UBPB_DICDI	Y4757_DICDI	Q54BB6_DICDI	Q86J16_DICDI	B0G199_DICDI	Q553T4_DICDI	Q54DT4_DICDI	Q54SH6_DICDI	Q55EJ1_DICDI
biological_process	GO:0006897	endocytosis	10	36	0.277778	0.971281	0.0425538	1	1	PAXB_DICDI	ABCG2_DICDI	MYOC_DICDI	EPS15_DICDI	GEFB_DICDI	Q1ZXE9_DICDI	Q54WI0_DICDI	Q54U23_DICDI	Q55E09_DICDI	Q54F48_DICDI
biological_process	GO:0006457	protein folding	10	64	0.15625	0.137307	0.913128	1	1	PDI2_DICDI	STIP1_DICDI	TCPH_DICDI	AHSA_DICDI	Q54WQ9_DICDI	Q54UW6_DICDI	Q55EH3_DICDI	Q54VN7_DICDI	Q86HI2_DICDI	Q55BE5_DICDI
biological_process	GO:0098609	cell-cell adhesion	10	35	0.285714	0.772525	0.333494	1	1	IFKA_DICDI	FRMA_DICDI	IFKB_DICDI	TALA_DICDI	TALB_DICDI	Y1806_DICDI	NAPA_DICDI	DTFA_DICDI	ACTNB_DICDI	Q75JM8_DICDI
biological_process	GO:0051017	actin filament bundle assembly	10	32	0.3125	0.858329	0.245914	1	1	KIF5_DICDI	FORC_DICDI	TALB_DICDI	ACTNA_DICDI	Q54XX0_DICDI	Q54DR3_DICDI	Q54FV6_DICDI	Q54UJ1_DICDI	Q552W4_DICDI	Q54XW9_DICDI
biological_process	GO:0000724	double-strand break repair via homologous recombination	10	34	0.294118	0.88248	0.186076	1	1	SMC6_DICDI	Q55AZ3_DICDI	Q54MD0_DICDI	Q54BN2_DICDI	Q86KB4_DICDI	Q54C05_DICDI	Q556X5_DICDI	Q54HN3_DICDI	Q54X37_DICDI	B0G0Y4_DICDI
biological_process	GO:0140582	adenylate cyclase-activating G protein-coupled cAMP receptor signaling pathway	9	26	0.346154	0.942507	0.125016	1	1	PDE6_DICDI	IFKA_DICDI	GTAC_DICDI	HD_DICDI	DHKA_DICDI	GBF_DICDI	CYAA_DICDI	YAKA_DICDI	Q86AD8_DICDI
biological_process	GO:0006470	protein dephosphorylation	9	28	0.321429	0.775417	0.339436	1	1	MPL1_DICDI	PATS1_DICDI	PTEN_DICDI	Y7071_DICDI	Y9461_DICDI	2AAA_DICDI	Q553B4_DICDI	Q54CH3_DICDI	Q54W95_DICDI
biological_process	GO:0055085	transmembrane transport	9	44	0.204545	0.00185539	0.999061	0.381	1	TAGA_DICDI	TAGB_DICDI	TAGC_DICDI	CTLHB_DICDI	ABCC5_DICDI	ABCB2_DICDI	ABCC2_DICDI	ABCH4_DICDI	Q86M88_DICDI
biological_process	GO:0006396	RNA processing	9	24	0.375	0.00090982	0.999393	0.203	1	TMCB_DICDI	NOL9_DICDI	RTCA_DICDI	Q552S2_DICDI	Q54E37_DICDI	Q54TL3_DICDI	Q54IC6_DICDI	B0G121_DICDI	Q95ZG5_DICDI
biological_process	GO:0006974	cellular response to DNA damage stimulus	9	38	0.236842	0.991918	0.0120049	1	1	DOT1L_DICDI	PRKDC_DICDI	WRIP1_DICDI	UBA1_DICDI	Q55AZ3_DICDI	Q54KQ4_DICDI	Q8T145_DICDI	Q54BR4_DICDI	Q54WG5_DICDI
biological_process	GO:0006302	double-strand break repair	9	26	0.346154	0.955226	0.0716005	1	1	KU70_DICDI	PRKDC_DICDI	RAD50_DICDI	Q54HY5_DICDI	Q54BN2_DICDI	Q86K74_DICDI	Q54Q95_DICDI	Q54E42_DICDI	Q55GU8_DICDI
biological_process	GO:0000902	cell morphogenesis	8	22	0.363636	0.748279	0.366246	1	1	FORH_DICDI	TALA_DICDI	SADA_DICDI	PIRA_DICDI	NAPA_DICDI	MYOI_DICDI	Q553W1_DICDI	Q55GV6_DICDI
biological_process	GO:0016477	cell migration	8	22	0.363636	0.888559	0.209947	1	1	PI3K2_DICDI	PI3K3_DICDI	TORA_DICDI	FORA_DICDI	PAXB_DICDI	NAPA_DICDI	Q54PT8_DICDI	Q54F55_DICDI
biological_process	GO:0046854	phosphatidylinositol phosphate biosynthetic process	8	19	0.421053	0.974746	0.0690294	1	1	PI3K2_DICDI	PI3K3_DICDI	FYV1_DICDI	PI4K_DICDI	Q54QM1_DICDI	Q54ZN9_DICDI	Q54XR3_DICDI	Q54F55_DICDI
biological_process	GO:0050920	regulation of chemotaxis	8	17	0.470588	0.926586	0.12691	1	1	PI3K2_DICDI	PI3K3_DICDI	PK2_DICDI	GBPC_DICDI	CYAA_DICDI	GBPD_DICDI	Q551V8_DICDI	Q54F55_DICDI
biological_process	GO:0007163	establishment or maintenance of cell polarity	8	35	0.228571	0.93389	0.114214	1	1	PAKB_DICDI	GBPC_DICDI	PAKA_DICDI	RACG_DICDI	RGAP1_DICDI	GBPD_DICDI	DYNA_DICDI	Q54PT8_DICDI
biological_process	GO:0000209	protein polyubiquitination	8	52	0.153846	0.164614	0.904758	1	1	RBRA_DICDI	C7G034_DICDI	Q54KQ4_DICDI	Q54SX5_DICDI	Q54U33_DICDI	Q54DM8_DICDI	Q54EF6_DICDI	Q55CB4_DICDI
biological_process	GO:0006890	retrograde vesicle-mediated transport, Golgi to endoplasmic reticulum	8	19	0.421053	0.982619	0.0515195	1	1	COPA_DICDI	COPD_DICDI	COG7_DICDI	COPB2_DICDI	Q55CJ0_DICDI	Q55E09_DICDI	Q54YZ1_DICDI	Q55GJ4_DICDI
biological_process	GO:0006367	transcription initiation from RNA polymerase II promoter	8	25	0.32	0.918301	0.159175	1	1	TF2AA_DICDI	TF2B_DICDI	Q55BH6_DICDI	Q54X70_DICDI	Q54IW7_DICDI	Q553J7_DICDI	C7G081_DICDI	Q54ZA9_DICDI
biological_process	GO:0099139	cheating during chimeric sorocarp development	8	23	0.347826	0.936921	0.140649	1	1	FBXA_DICDI	DHKE_DICDI	PATS1_DICDI	PKS2_DICDI	Q54DS6_DICDI	Q54DK9_DICDI	Q54R76_DICDI	Q54VJ6_DICDI
biological_process	GO:0032259	methylation	7	45	0.155556	0.00372149	0.998209	0.607	1	METH_DICDI	CARME_DICDI	METE_DICDI	OMT9_DICDI	OMT10_DICDI	Y4059_DICDI	Q557I0_DICDI
biological_process	GO:0044351	macropinocytosis	7	17	0.411765	0.978295	0.0523192	1	1	PI3K2_DICDI	SCAR_DICDI	TPP1_DICDI	NICA_DICDI	GEFF_DICDI	Q86KX8_DICDI	Q55CR5_DICDI
biological_process	GO:0000045	autophagosome assembly	7	23	0.304348	0.888559	0.209947	1	1	VP13C_DICDI	Y3337_DICDI	Q54DQ9_DICDI	Q54MY6_DICDI	Q8MMZ9_DICDI	Q54SA0_DICDI	Q54T12_DICDI
biological_process	GO:0006972	hyperosmotic response	7	44	0.159091	0.133242	0.93298	1	1	RTOA_DICDI	SIGJ_DICDI	YAKA_DICDI	NAPA_DICDI	ABCGL_DICDI	ACTNA_DICDI	Q75J86_DICDI
biological_process	GO:0007030	Golgi organization	7	22	0.318182	0.874984	0.237485	1	1	MTAA_DICDI	COG7_DICDI	COG3_DICDI	Q54JP0_DICDI	Q55BR0_DICDI	Q8T2J5_DICDI	Q556P7_DICDI
biological_process	GO:0031149	sorocarp stalk cell differentiation	7	23	0.304348	0.971471	0.0594767	1	1	TAGB_DICDI	GTAC_DICDI	HD_DICDI	DHKD_DICDI	STATA_DICDI	PKS1_DICDI	Y1806_DICDI
biological_process	GO:0030154	cell differentiation	7	28	0.25	0.863973	0.177456	1	1	RBLA_DICDI	TAGA_DICDI	TAGC_DICDI	HD_DICDI	PSIA_DICDI	ABCG2_DICDI	DIA1_DICDI
biological_process	GO:0043326	chemotaxis to folate	7	22	0.318182	0.886332	0.230503	1	1	GACG_DICDI	PAXB_DICDI	TSUA_DICDI	ABIA_DICDI	GPA5_DICDI	Q55AA6_DICDI	Q54RC0_DICDI
biological_process	GO:0006261	DNA-dependent DNA replication	7	15	0.466667	0.96512	0.0627464	1	1	RFC3_DICDI	RFC4_DICDI	WRIP1_DICDI	MCMBP_DICDI	DPOE2_DICDI	Q55FY5_DICDI	Q86IV6_DICDI
biological_process	GO:0000422	autophagy of mitochondrion	7	15	0.466667	0.988542	0.0371454	1	1	ATG9_DICDI	Y3337_DICDI	ATG18_DICDI	Q54MY6_DICDI	Q8MMZ9_DICDI	Q54SA0_DICDI	Q54T12_DICDI
biological_process	GO:0006955	immune response	7	18	0.388889	0.770956	0.32464	1	1	CYSP7_DICDI	CYSP4_DICDI	CYSP6_DICDI	Q55GS9_DICDI	Q555H5_DICDI	Q54BH0_DICDI	Q54UH3_DICDI
biological_process	GO:0001732	formation of cytoplasmic translation initiation complex	7	15	0.466667	0.98938	0.0382827	1	1	EIF3A_DICDI	EIF3I_DICDI	EIF3M_DICDI	EIF3E_DICDI	EIF3H_DICDI	EIF3L_DICDI	EIF3D_DICDI
biological_process	GO:0016311	dephosphorylation	7	15	0.466667	0.947444	0.0848183	1	1	CF60_DICDI	MPL1_DICDI	PTEN_DICDI	PTP3_DICDI	Q553B4_DICDI	Q54CH3_DICDI	Q54GT8_DICDI
biological_process	GO:0006805	xenobiotic metabolic process	7	30	0.233333	0.570805	0.598419	1	1	C516B_DICDI	C519B_DICDI	C516A_DICDI	Q551B3_DICDI	Q54XF5_DICDI	Q54FE2_DICDI	Q54PM2_DICDI
biological_process	GO:1903665	negative regulation of asexual reproduction	6	22	0.272727	0.859351	0.269814	1	1	RBLA_DICDI	IPLA_DICDI	GRLD_DICDI	PAKD_DICDI	PTEN_DICDI	TBC5B_DICDI
biological_process	GO:0005975	carbohydrate metabolic process	6	62	0.0967742	0.00453332	0.997537	0.679	1	PGM1_DICDI	BGAL1_DICDI	Q54CN0_DICDI	Q54GR4_DICDI	Q55D50_DICDI	Q54TE6_DICDI
biological_process	GO:0031156	regulation of sorocarp development	6	21	0.285714	0.93389	0.114214	1	1	RBLA_DICDI	DOT1L_DICDI	HD_DICDI	DHKL_DICDI	PAKA_DICDI	TBC5B_DICDI
biological_process	GO:0014065	phosphatidylinositol 3-kinase signaling	6	13	0.461538	0.974271	0.07521	1	1	PI3K2_DICDI	PI3K3_DICDI	PTEN_DICDI	Q553B4_DICDI	Q54CH3_DICDI	Q54F55_DICDI
biological_process	GO:0048015	phosphatidylinositol-mediated signaling	6	17	0.352941	0.942507	0.125016	1	1	PI3K2_DICDI	PI3K3_DICDI	PI4K_DICDI	PTEN_DICDI	Q54ZN9_DICDI	Q54F55_DICDI
biological_process	GO:0031269	pseudopodium assembly	6	13	0.461538	0.992242	0.0252545	1	1	PI3K2_DICDI	SCAR_DICDI	PTEN_DICDI	PIRA_DICDI	ABIA_DICDI	Q7KWP7_DICDI
biological_process	GO:0043157	response to cation stress	6	14	0.428571	0.974626	0.0813094	1	1	CUPB_DICDI	CUPG_DICDI	CUPJ_DICDI	CUPI_DICDI	CUPH_DICDI	Q54P52_DICDI
biological_process	GO:0043161	proteasome-mediated ubiquitin-dependent protein catabolic process	6	54	0.111111	0.578893	0.496659	1	1	ATG9_DICDI	GID8_DICDI	Q54IY4_DICDI	C7G034_DICDI	Q54D90_DICDI	Q54EF6_DICDI
biological_process	GO:0032456	endocytic recycling	6	12	0.5	0.98938	0.0382827	1	1	WASH1_DICDI	Q54BQ6_DICDI	Q86HF6_DICDI	Q54UN7_DICDI	Q54NV0_DICDI	Q54MU4_DICDI
biological_process	GO:1903669	positive regulation of chemorepellent activity	6	20	0.3	0.841197	0.308243	1	1	RBLA_DICDI	SCAR_DICDI	IPLA_DICDI	PAKD_DICDI	PTEN_DICDI	ERK1_DICDI
biological_process	GO:0010629	negative regulation of gene expression	6	20	0.3	0.993118	0.0118187	1	1	STK11_DICDI	SESN_DICDI	PKS1_DICDI	YAKA_DICDI	HBX4_DICDI	Q54ET8_DICDI
biological_process	GO:0032956	regulation of actin cytoskeleton organization	6	32	0.1875	0.712671	0.364348	1	1	GACII_DICDI	GACG_DICDI	RACG_DICDI	Q54DW4_DICDI	Q54DS6_DICDI	Q54I34_DICDI
biological_process	GO:0006338	chromatin remodeling	6	18	0.333333	0.898751	0.175377	1	1	Y0170_DICDI	Q550R6_DICDI	Q54YQ6_DICDI	Q54DG0_DICDI	Q54VX6_DICDI	Q54WV6_DICDI
biological_process	GO:0045053	protein retention in Golgi apparatus	6	10	0.6	0.997858	0.0133084	1	1	VP13A_DICDI	VP13C_DICDI	VP13F_DICDI	VP13E_DICDI	VP13B_DICDI	Q86IF6_DICDI
biological_process	GO:0006623	protein targeting to vacuole	6	13	0.461538	0.974626	0.0813094	1	1	VP13A_DICDI	VP13C_DICDI	VP13F_DICDI	VP13E_DICDI	VP13B_DICDI	Q54EK0_DICDI
biological_process	GO:0006869	lipid transport	6	17	0.352941	0.773733	0.33647	1	1	ATG9_DICDI	ABCAA_DICDI	ABCA4_DICDI	ABCA7_DICDI	ABCA9_DICDI	Q556Y3_DICDI
biological_process	GO:0031146	SCF-dependent proteasomal ubiquitin-dependent protein catabolic process	6	15	0.4	0.961717	0.109994	1	1	CUL2_DICDI	Q54PH6_DICDI	Q54E47_DICDI	Q54KC6_DICDI	Q54P05_DICDI	Q55G05_DICDI
biological_process	GO:0006289	nucleotide-excision repair	6	16	0.375	0.562508	0.618739	1	1	TF2H3_DICDI	TF2H4_DICDI	TF2H1_DICDI	DPOE1_DICDI	Q54LI7_DICDI	Q54TY2_DICDI
biological_process	GO:0006369	termination of RNA polymerase II transcription	6	12	0.5	0.990923	0.0381597	1	1	Q54HF4_DICDI	Q55F22_DICDI	Q55EG2_DICDI	Q55F23_DICDI	Q55DZ3_DICDI	Q54WL8_DICDI
biological_process	GO:0016075	rRNA catabolic process	6	16	0.375	0.930971	0.158803	1	1	Q54GU2_DICDI	Q55BB0_DICDI	Q54K15_DICDI	Q55FB1_DICDI	Q75JF5_DICDI	Q95ZG5_DICDI
biological_process	GO:0051602	response to electrical stimulus	5	9	0.555556	0.993392	0.0356436	1	1	PI3K2_DICDI	PK2_DICDI	GBPC_DICDI	RIP3_DICDI	Q551V8_DICDI
biological_process	GO:0033298	contractile vacuole organization	5	22	0.227273	0.599402	0.600172	1	1	LVSA_DICDI	LVSD_DICDI	AP1B_DICDI	Q54Y50_DICDI	Q54DW4_DICDI
biological_process	GO:0006970	response to osmotic stress	5	16	0.3125	0.680346	0.407078	1	1	STK11_DICDI	LVSB_DICDI	RTOA_DICDI	PTP3_DICDI	CLH_DICDI
biological_process	GO:0031153	slug development involved in sorocarp development	5	16	0.3125	0.856911	0.303341	1	1	ATG9_DICDI	EXPL3_DICDI	HBX4_DICDI	ERK1_DICDI	Q54RA9_DICDI
biological_process	GO:0019934	cGMP-mediated signaling	5	10	0.5	0.974626	0.0813094	1	1	PDE5_DICDI	PDE6_DICDI	GBPC_DICDI	GBPD_DICDI	Q551V8_DICDI
biological_process	GO:0034260	negative regulation of GTPase activity	5	9	0.555556	0.993392	0.0356436	1	1	PDE5_DICDI	PAKD_DICDI	Y1806_DICDI	RGAPB_DICDI	NDRC_DICDI
biological_process	GO:0006298	mismatch repair	5	15	0.333333	0.779545	0.406313	1	1	MSH3_DICDI	MSH6_DICDI	PMS1_DICDI	MLH1_DICDI	Q54QI0_DICDI
biological_process	GO:0006979	response to oxidative stress	5	31	0.16129	0.118315	0.930059	1	1	STK11_DICDI	CATB_DICDI	RTOA_DICDI	YAKA_DICDI	Q86AD8_DICDI
biological_process	GO:0000462	maturation of SSU-rRNA from tricistronic rRNA transcript (SSU-rRNA, 5.8S rRNA, LSU-rRNA)	5	19	0.263158	0.604919	0.578462	1	1	PWP2_DICDI	HEAT1_DICDI	Q54BS1_DICDI	Q54KG8_DICDI	Q54D60_DICDI
biological_process	GO:0000122	negative regulation of transcription by RNA polymerase II	5	21	0.238095	0.645791	0.554814	1	1	RBLA_DICDI	Y6505_DICDI	NFX1_DICDI	Q54UJ3_DICDI	Q54IH7_DICDI
biological_process	GO:0044671	sorocarp spore cell differentiation	5	19	0.263158	0.926586	0.12691	1	1	CYAD_DICDI	DHKD_DICDI	FORC_DICDI	NICA_DICDI	PKS1_DICDI
biological_process	GO:0046777	protein autophosphorylation	5	21	0.238095	0.769497	0.400598	1	1	PAKB_DICDI	STK11_DICDI	DHKA_DICDI	DHKH_DICDI	DYRK1_DICDI
biological_process	GO:0030838	positive regulation of actin filament polymerization	5	18	0.277778	0.873592	0.219268	1	1	SCAR_DICDI	FORG_DICDI	FORH_DICDI	NAPA_DICDI	RACG_DICDI
biological_process	GO:0006914	autophagy	5	25	0.2	0.501227	0.607369	1	1	RAB24_DICDI	NICA_DICDI	ATG18_DICDI	ATG4_DICDI	Q55BR0_DICDI
biological_process	GO:0031157	regulation of aggregate size involved in sorocarp development	5	20	0.25	0.649515	0.520441	1	1	CTNA_DICDI	GPA5_DICDI	ERK1_DICDI	Q55F85_DICDI	C7G077_DICDI
biological_process	GO:0007188	adenylate cyclase-modulating G protein-coupled receptor signaling pathway	5	18	0.277778	0.931681	0.111334	1	1	GPA11_DICDI	PTEN_DICDI	GPA7_DICDI	GPA5_DICDI	Q54UG5_DICDI
biological_process	GO:0106070	regulation of adenylate cyclase-activating G protein-coupled receptor signaling pathway	5	16	0.3125	0.872617	0.263411	1	1	ADCB_DICDI	PKS1_DICDI	GEFB_DICDI	GEFM_DICDI	Q54L33_DICDI
biological_process	GO:0042331	phototaxis	5	16	0.3125	0.968994	0.073073	1	1	ATG9_DICDI	GNRA_DICDI	ROCO4_DICDI	Q86KG9_DICDI	Q556T3_DICDI
biological_process	GO:0006891	intra-Golgi vesicle-mediated transport	5	20	0.25	0.691757	0.507051	1	1	COPA_DICDI	COG8_DICDI	COG3_DICDI	COPB2_DICDI	Q54R70_DICDI
biological_process	GO:0030010	establishment of cell polarity	5	11	0.454545	0.961717	0.109994	1	1	PAKA_DICDI	PTEN_DICDI	TSUA_DICDI	MYOG_DICDI	Q557I6_DICDI
biological_process	GO:0050765	negative regulation of phagocytosis	5	14	0.357143	0.918691	0.205506	1	1	PAXB_DICDI	LIMCH_DICDI	RIP3_DICDI	DRKD_DICDI	Q1ZXJ2_DICDI
biological_process	GO:0007155	cell adhesion	5	35	0.142857	0.943572	0.085569	1	1	LVSA_DICDI	SIBB_DICDI	SIBC_DICDI	SIBD_DICDI	SIBE_DICDI
biological_process	GO:0051603	proteolysis involved in cellular protein catabolic process	5	28	0.178571	0.249069	0.795308	1	1	CYSP7_DICDI	CYSP4_DICDI	CYSP6_DICDI	Q54MB6_DICDI	Q54UH3_DICDI
biological_process	GO:0051085	chaperone cofactor-dependent protein refolding	5	13	0.384615	0.942663	0.16115	1	1	HS7C5_DICDI	HS7C4_DICDI	Y5729_DICDI	Q54XR6_DICDI	Q54TF9_DICDI
biological_process	GO:0072583	clathrin-dependent endocytosis	5	11	0.454545	0.976382	0.0866127	1	1	AP2A2_DICDI	CLH_DICDI	Q8T867_DICDI	Q54Y50_DICDI	C7FZZ0_DICDI
biological_process	GO:0031145	anaphase-promoting complex-dependent catabolic process	5	16	0.3125	0.856911	0.303341	1	1	APC4_DICDI	CDH1_DICDI	APC2_DICDI	APC3_DICDI	CDC16_DICDI
biological_process	GO:0046956	positive phototaxis	5	11	0.454545	0.976382	0.0866127	1	1	FRMA_DICDI	FORF_DICDI	NAPA_DICDI	GEFE_DICDI	GEFL_DICDI
biological_process	GO:0006402	mRNA catabolic process	5	13	0.384615	0.979995	0.0373286	1	1	Q55AW0_DICDI	Q54N92_DICDI	Q54WH0_DICDI	Q54R87_DICDI	Q54U17_DICDI
biological_process	GO:0051639	actin filament network formation	5	8	0.625	0.997262	0.0195129	1	1	FORG_DICDI	FORC_DICDI	Q54XX0_DICDI	Q54DR3_DICDI	Q54XW9_DICDI
biological_process	GO:0006631	fatty acid metabolic process	5	23	0.217391	0.902776	0.137885	1	1	APT11_DICDI	Q54DE7_DICDI	Q54NV9_DICDI	Q54QX6_DICDI	Q54QX5_DICDI
biological_process	GO:0043547	positive regulation of GTPase activity	5	13	0.384615	0.937254	0.10604	1	1	RGAP1_DICDI	GEFQ_DICDI	Q54WI0_DICDI	Q54P30_DICDI	Q54VB2_DICDI
biological_process	GO:0006303	double-strand break repair via nonhomologous end joining	5	11	0.454545	0.856911	0.303341	1	1	DCR1_DICDI	KU70_DICDI	PRKDC_DICDI	Q86H44_DICDI	Q54BN2_DICDI
biological_process	GO:0036297	interstrand cross-link repair	5	9	0.555556	0.986692	0.0579788	1	1	DCR1_DICDI	MSH6_DICDI	FAN1_DICDI	Q8T145_DICDI	Q54WG5_DICDI
biological_process	GO:0006378	mRNA polyadenylation	5	14	0.357143	0.890006	0.253262	1	1	CPSF2_DICDI	PAP_DICDI	Q55DZ3_DICDI	Q54WL8_DICDI	Q54TS6_DICDI
biological_process	GO:0006487	protein N-linked glycosylation	5	25	0.2	0.190913	0.908413	1	1	OST1_DICDI	Q75JV8_DICDI	Q559V6_DICDI	Q54Y16_DICDI	Q559V4_DICDI
biological_process	GO:0000184	nuclear-transcribed mRNA catabolic process, nonsense-mediated decay	5	12	0.416667	0.984214	0.057337	1	1	NCBP1_DICDI	RENT1_DICDI	DDX17_DICDI	Q54R12_DICDI	Q54R87_DICDI
biological_process	GO:0032508	DNA duplex unwinding	5	9	0.555556	0.961717	0.109994	1	1	RAD50_DICDI	Q55FJ4_DICDI	Q54RN8_DICDI	Q54Z42_DICDI	B0G0Y4_DICDI
biological_process	GO:0007076	mitotic chromosome condensation	5	8	0.625	0.997262	0.0195129	1	1	SMC4_DICDI	SMC2_DICDI	Q54TZ8_DICDI	Q86I09_DICDI	Q54XY3_DICDI
biological_process	GO:0017148	negative regulation of translation	5	19	0.263158	0.629392	0.506869	1	1	Q54B26_DICDI	Q553Y8_DICDI	Q86AP3_DICDI	Q54U17_DICDI	Q54WA7_DICDI
biological_process	GO:0006896	Golgi to vacuole transport	5	8	0.625	0.993392	0.0356436	1	1	VPS45_DICDI	AP1G_DICDI	Q54BQ6_DICDI	Q86HF6_DICDI	Q559A5_DICDI
biological_process	GO:0030050	vesicle transport along actin filament	5	12	0.416667	0.96184	0.121222	1	1	MYOC_DICDI	MYOF_DICDI	MYOG_DICDI	MYOI_DICDI	MYOJ_DICDI
biological_process	GO:0010421	hydrogen peroxide-mediated programmed cell death	5	9	0.555556	0.993392	0.0356436	1	1	Q86KC8_DICDI	Q54HY5_DICDI	Q54E42_DICDI	Q54LJ4_DICDI	Q55GU8_DICDI
biological_process	GO:0010918	positive regulation of mitochondrial membrane potential	5	9	0.555556	0.993392	0.0356436	1	1	Q86KC8_DICDI	Q54HY5_DICDI	Q54E42_DICDI	Q54LJ4_DICDI	Q55GU8_DICDI
biological_process	GO:0061952	midbody abscission	4	5	0.8	0.999342	0.0116229	1	1	DLPB_DICDI	HD_DICDI	PAXB_DICDI	DYNA_DICDI
biological_process	GO:1905303	positive regulation of macropinocytosis	4	9	0.444444	0.964356	0.132361	1	1	PI3K2_DICDI	PK2_DICDI	FORG_DICDI	GACG_DICDI
biological_process	GO:0007005	mitochondrion organization	4	19	0.210526	0.837768	0.219465	1	1	PHB2_DICDI	FTSZB_DICDI	FTSZA_DICDI	DYNA_DICDI
biological_process	GO:0042742	defense response to bacterium	4	29	0.137931	0.525715	0.61513	1	1	TIRA_DICDI	NRAM1_DICDI	LYSG3_DICDI	ERK1_DICDI
biological_process	GO:0006096	glycolytic process	4	20	0.2	0.769497	0.400598	1	1	ODP2_DICDI	Y1564_DICDI	DHTK1_DICDI	Q86HD1_DICDI
biological_process	GO:0001845	phagolysosome assembly	4	6	0.666667	0.542651	0.67219	1	1	PI3K2_DICDI	LVSB_DICDI	LMPA_DICDI	Q54EY0_DICDI
biological_process	GO:0090382	phagosome maturation	4	9	0.444444	0.985708	0.034178	1	1	PI3K2_DICDI	ATG9_DICDI	DYHC_DICDI	VACC_DICDI
biological_process	GO:0000160	phosphorelay signal transduction system	4	9	0.444444	0.964356	0.132361	1	1	CYAD_DICDI	DHKM_DICDI	DOKA_DICDI	Q55CH1_DICDI
biological_process	GO:0010225	response to UV-C	4	10	0.4	0.942021	0.181949	1	1	CTNA_DICDI	CYAA_DICDI	YAKA_DICDI	Q55GU8_DICDI
biological_process	GO:0030837	negative regulation of actin filament polymerization	4	11	0.363636	0.217125	0.901239	1	1	PDE5_DICDI	TSUA_DICDI	RGAP1_DICDI	Q54QH4_DICDI
biological_process	GO:0034976	response to endoplasmic reticulum stress	4	5	0.8	0.987884	0.0243067	1	1	PDI2_DICDI	UFL1_DICDI	Q54UW6_DICDI	Q86HI2_DICDI
biological_process	GO:0006952	defense response	4	9	0.444444	0.63797	0.48705	1	1	TIRA_DICDI	STATB_DICDI	STATA_DICDI	Q86I20_DICDI
biological_process	GO:0045892	negative regulation of transcription, DNA-templated	4	15	0.266667	0.96142	0.0695677	1	1	STATB_DICDI	STATA_DICDI	Q54SJ6_DICDI	Q54ZN0_DICDI
biological_process	GO:0043520	regulation of myosin II filament assembly	4	15	0.266667	0.856911	0.303341	1	1	HD_DICDI	RIP3_DICDI	RGAP1_DICDI	GEFQ_DICDI
biological_process	GO:0006904	vesicle docking involved in exocytosis	4	10	0.4	0.942021	0.181949	1	1	SEC1_DICDI	VPS11_DICDI	Q55CS3_DICDI	Q54ZW8_DICDI
biological_process	GO:0051726	regulation of cell cycle	4	11	0.363636	0.983489	0.0276558	1	1	Q7KWP1_DICDI	C7FZZ4_DICDI	Q54LF4_DICDI	Q75JL4_DICDI
biological_process	GO:0016042	lipid catabolic process	4	13	0.307692	0.0866169	0.952953	1	1	PLDC_DICDI	PLDA_DICDI	Q55EU8_DICDI	Q54Q49_DICDI
biological_process	GO:0051123	RNA polymerase II preinitiation complex assembly	4	9	0.444444	0.942021	0.181949	1	1	TAF1_DICDI	TF2B_DICDI	Q55BH6_DICDI	Q54IW7_DICDI
biological_process	GO:0006412	translation	4	114	0.0350877	6.5245e-05	0.999965	0.012	1	RS3A_DICDI	HD_DICDI	Q54CA5_DICDI	Q23891_DICDI
biological_process	GO:0007031	peroxisome organization	4	14	0.285714	0.645791	0.554814	1	1	PEX10_DICDI	PEX1_DICDI	ABCD3_DICDI	ABCD2_DICDI
biological_process	GO:0006260	DNA replication	4	23	0.173913	0.971878	0.0476335	1	1	RIR1_DICDI	Q54MD0_DICDI	Q55FJ4_DICDI	Q54Z42_DICDI
biological_process	GO:0006383	transcription by RNA polymerase III	4	19	0.210526	0.888559	0.209947	1	1	RPAB1_DICDI	Q54U85_DICDI	Q86I37_DICDI	Q8T1F9_DICDI
biological_process	GO:0051896	regulation of protein kinase B signaling	4	8	0.5	0.942663	0.16115	1	1	PTEN_DICDI	Q553B4_DICDI	Q54L33_DICDI	Q54CH3_DICDI
biological_process	GO:0006360	transcription by RNA polymerase I	4	14	0.285714	0.982619	0.0515195	1	1	RPA1_DICDI	RPAB1_DICDI	RPC2_DICDI	TF2H1_DICDI
biological_process	GO:0007040	lysosome organization	4	10	0.4	0.649515	0.520441	1	1	LVSB_DICDI	WASC5_DICDI	Q54WI0_DICDI	Q54RP3_DICDI
biological_process	GO:0007166	cell surface receptor signaling pathway	4	16	0.25	0.821091	0.27872	1	1	LRLA_DICDI	FSCA_DICDI	TGRB1_DICDI	Q54CT2_DICDI
biological_process	GO:0044805	late nucleophagy	4	7	0.571429	0.990971	0.0544442	1	1	ATG9_DICDI	Y3337_DICDI	Q8MMZ9_DICDI	Q54T12_DICDI
biological_process	GO:0009267	cellular response to starvation	4	9	0.444444	0.985245	0.0220366	1	1	LVSB_DICDI	RPTOR_DICDI	ACTNA_DICDI	DIA1_DICDI
biological_process	GO:0007041	lysosomal transport	4	6	0.666667	0.92479	0.180114	1	1	LVSB_DICDI	WASH1_DICDI	CLH_DICDI	Q54WI0_DICDI
biological_process	GO:0006417	regulation of translation	4	4	1	0.715275	0.372877	1	1	IFKA_DICDI	PIRA_DICDI	Q54UD1_DICDI	Q54IS5_DICDI
biological_process	GO:0034472	snRNA 3'-end processing	4	8	0.5	0.900567	0.220455	1	1	INT7_DICDI	INT2_DICDI	INT5_DICDI	INT6_DICDI
biological_process	GO:0031150	sorocarp stalk development	4	7	0.571429	0.992842	0.0158659	1	1	DHKA_DICDI	ROCO4_DICDI	C7FZZ0_DICDI	Q54ET8_DICDI
biological_process	GO:0009847	spore germination	4	13	0.307692	0.918691	0.205506	1	1	MYOI_DICDI	ACTNB_DICDI	DHKC_DICDI	Q1ZXE9_DICDI
biological_process	GO:0016973	poly(A)+ mRNA export from nucleus	4	10	0.4	0.942021	0.181949	1	1	GLE1_DICDI	Q54WG8_DICDI	Q54KA3_DICDI	Q86A81_DICDI
biological_process	GO:0030488	tRNA methylation	4	21	0.190476	0.280986	0.863515	1	1	TRM6_DICDI	Q55EX4_DICDI	Q553Q9_DICDI	Q54J76_DICDI
biological_process	GO:0006898	receptor-mediated endocytosis	4	6	0.666667	0.99576	0.0170007	1	1	AP2A2_DICDI	AP1G_DICDI	CLH_DICDI	Q54LZ3_DICDI
biological_process	GO:0006893	Golgi to plasma membrane transport	4	8	0.5	0.913387	0.236427	1	1	EXOC8_DICDI	EXOC1_DICDI	EXOC5_DICDI	EXOC6_DICDI
biological_process	GO:0006971	hypotonic response	4	15	0.266667	0.647349	0.536143	1	1	AP2A2_DICDI	HD_DICDI	AP1B_DICDI	Q54Y50_DICDI
biological_process	GO:0006607	NLS-bearing protein import into nucleus	4	7	0.571429	0.990971	0.0544442	1	1	NUP54_DICDI	IMA1A_DICDI	Q75JH1_DICDI	Q54XC5_DICDI
biological_process	GO:0048102	autophagic cell death	4	7	0.571429	0.990971	0.0544442	1	1	IPLA_DICDI	GBF_DICDI	TALB_DICDI	DHKM_DICDI
biological_process	GO:0006270	DNA replication initiation	4	13	0.307692	0.593687	0.62696	1	1	ORC4_DICDI	ORC6_DICDI	Q54RU0_DICDI	Q54BH3_DICDI
biological_process	GO:0006413	translational initiation	4	14	0.285714	0.886971	0.19592	1	1	EIF3E_DICDI	EIF2A_DICDI	EIF3L_DICDI	EIF3D_DICDI
biological_process	GO:0008285	negative regulation of cell population proliferation	4	7	0.571429	0.990971	0.0544442	1	1	BTG_DICDI	PTEN_DICDI	Q553B4_DICDI	Q54CH3_DICDI
biological_process	GO:0006486	protein glycosylation	4	29	0.137931	0.0303815	0.986302	0.999	1	Q54NH1_DICDI	Q55EK3_DICDI	Q54W89_DICDI	Q54IX1_DICDI
biological_process	GO:0050829	defense response to Gram-negative bacterium	4	9	0.444444	0.964356	0.132361	1	1	FYV1_DICDI	VP13F_DICDI	WASH1_DICDI	DRKD_DICDI
biological_process	GO:0006611	protein export from nucleus	4	7	0.571429	0.980487	0.0893754	1	1	XPO7_DICDI	XPO5_DICDI	XPO6_DICDI	XPO2_DICDI
biological_process	GO:0000712	resolution of meiotic recombination intermediates	4	12	0.333333	0.878778	0.294029	1	1	MUS81_DICDI	TOP2M_DICDI	Q556X5_DICDI	Q54PQ3_DICDI
biological_process	GO:0006384	transcription initiation from RNA polymerase III promoter	4	8	0.5	0.980487	0.0893754	1	1	TF3C5_DICDI	Q54U85_DICDI	Q54FU1_DICDI	Q54R53_DICDI
biological_process	GO:0030198	extracellular matrix organization	4	46	0.0869565	0.0101156	0.997179	0.935	1	Q54SS3_DICDI	Q54PW1_DICDI	Q54KW3_DICDI	Q54DS7_DICDI
biological_process	GO:0006906	vesicle fusion	4	27	0.148148	0.11926	0.938483	1	1	RTOA_DICDI	Q54R67_DICDI	Q55DR2_DICDI	Q54HM5_DICDI
biological_process	GO:0006665	sphingolipid metabolic process	4	18	0.222222	0.0321309	0.987546	1	1	Y8017_DICDI	Q54WE0_DICDI	Q75JX1_DICDI	Q75K05_DICDI
biological_process	GO:0034727	piecemeal microautophagy of the nucleus	4	8	0.5	0.980487	0.0893754	1	1	Y3337_DICDI	Q54MY6_DICDI	Q8MMZ9_DICDI	Q54T12_DICDI
biological_process	GO:0061709	reticulophagy	4	5	0.8	0.999342	0.0116229	1	1	Y3337_DICDI	Q54MY6_DICDI	Q8MMZ9_DICDI	Q54T12_DICDI
biological_process	GO:0051260	protein homooligomerization	4	15	0.266667	0.696659	0.5254	1	1	Q54X06_DICDI	Q54MM2_DICDI	Q54XA6_DICDI	Q55D73_DICDI
biological_process	GO:0016570	histone modification	4	5	0.8	0.681127	0.422315	1	1	Q54Y92_DICDI	Q55E33_DICDI	Q555G9_DICDI	Q54QM3_DICDI
biological_process	GO:0016246	RNA interference	4	6	0.666667	0.976382	0.0866127	1	1	Q1ZXG9_DICDI	Q54HL3_DICDI	Q7KWS3_DICDI	Q86HF5_DICDI
biological_process	GO:0022607	cellular component assembly	4	14	0.285714	0.963041	0.0459621	1	1	Q54DW4_DICDI	Q54DS6_DICDI	Q54YF3_DICDI	Q55CT2_DICDI
biological_process	GO:0045332	phospholipid translocation	4	10	0.4	0.913387	0.236427	1	1	Q553A4_DICDI	Q55E61_DICDI	Q55E09_DICDI	Q54RS1_DICDI
biological_process	GO:0006997	nucleus organization	3	7	0.428571	0.995124	0.0173811	1	1	DLPB_DICDI	SUN1_DICDI	DYNA_DICDI
biological_process	GO:0007186	G protein-coupled receptor signaling pathway	3	20	0.15	0.735126	0.350839	1	1	PI3K2_DICDI	GPA5_DICDI	ERK1_DICDI
biological_process	GO:0036092	phosphatidylinositol-3-phosphate biosynthetic process	3	8	0.375	0.910625	0.275404	1	1	PI3K2_DICDI	PI3K3_DICDI	Q54F55_DICDI
biological_process	GO:0051591	response to cAMP	3	18	0.166667	0.37304	0.822354	1	1	PI3K2_DICDI	RGAP1_DICDI	Q86AD8_DICDI
biological_process	GO:0031000	response to caffeine	3	8	0.375	0.910625	0.275404	1	1	CYAD_DICDI	CYAA_DICDI	TBC5B_DICDI
biological_process	GO:0006272	leading strand elongation	3	10	0.3	0.818051	0.41763	1	1	RFC3_DICDI	RFC4_DICDI	DPOE1_DICDI
biological_process	GO:0032465	regulation of cytokinesis	3	10	0.3	0.645315	0.577927	1	1	PLK_DICDI	Q54BR8_DICDI	Q75JF7_DICDI
biological_process	GO:0007259	receptor signaling pathway via JAK-STAT	3	4	0.75	0.945556	0.205643	1	1	STATB_DICDI	STATA_DICDI	Q86I20_DICDI
biological_process	GO:0042127	regulation of cell population proliferation	3	6	0.5	0.993801	0.0253736	1	1	STATB_DICDI	STATA_DICDI	Q86I20_DICDI
biological_process	GO:0050766	positive regulation of phagocytosis	3	12	0.25	0.746738	0.469885	1	1	PAKB_DICDI	GEFB_DICDI	Q54VB2_DICDI
biological_process	GO:0043408	regulation of MAPK cascade	3	11	0.272727	0.439793	0.725311	1	1	PAKB_DICDI	PAKA_DICDI	PAKD_DICDI
biological_process	GO:1904515	positive regulation of TORC2 signaling	3	7	0.428571	0.945556	0.205643	1	1	RIP3_DICDI	SCAA_DICDI	Q55G82_DICDI
biological_process	GO:0030833	regulation of actin filament polymerization	3	22	0.136364	0.608354	0.498773	1	1	CYRI_DICDI	PIRA_DICDI	Q7KWP7_DICDI
biological_process	GO:0032436	positive regulation of proteasomal ubiquitin-dependent protein catabolic process	3	21	0.142857	0.357213	0.814069	1	1	RBRA_DICDI	Q54DM8_DICDI	Q55CB4_DICDI
biological_process	GO:0032543	mitochondrial translation	3	17	0.176471	0.136485	0.950621	1	1	GATB_DICDI	SYIM_DICDI	Y7952_DICDI
biological_process	GO:0008064	regulation of actin polymerization or depolymerization	3	5	0.6	0.641302	0.459172	1	1	SCAR_DICDI	NAPA_DICDI	ABIA_DICDI
biological_process	GO:0006874	cellular calcium ion homeostasis	3	11	0.272727	0.736589	0.457349	1	1	LVSA_DICDI	RTOA_DICDI	Q54EY0_DICDI
biological_process	GO:0016573	histone acetylation	3	13	0.230769	0.829517	0.310715	1	1	TRA1_DICDI	Y0777_DICDI	Q54JZ0_DICDI
biological_process	GO:0000727	double-strand break repair via break-induced replication	3	14	0.214286	0.587881	0.661848	1	1	MUS81_DICDI	Q54RU0_DICDI	Q54PQ3_DICDI
biological_process	GO:0006368	transcription elongation from RNA polymerase II promoter	3	14	0.214286	0.936921	0.140649	1	1	Q55E33_DICDI	Q55A48_DICDI	Q555G9_DICDI
biological_process	GO:0009653	anatomical structure morphogenesis	3	9	0.333333	0.769497	0.283983	1	1	SPLA_DICDI	WARA_DICDI	Q54FA3_DICDI
biological_process	GO:0071902	positive regulation of protein serine/threonine kinase activity	3	8	0.375	0.422073	0.789788	1	1	STK11_DICDI	RPTOR_DICDI	SCAA_DICDI
biological_process	GO:0032008	positive regulation of TOR signaling	3	9	0.333333	0.872617	0.263411	1	1	SEC13_DICDI	LTOR5_DICDI	WDR24_DICDI
biological_process	GO:1904643	response to curcumin	3	16	0.1875	0.4746	0.752401	1	1	CYAA_DICDI	YAKA_DICDI	Q86AD8_DICDI
biological_process	GO:0008380	RNA splicing	3	22	0.136364	0.0100725	0.994514	0.931	1	DHX16_DICDI	HELCL_DICDI	PRP8_DICDI
biological_process	GO:0006464	cellular protein modification process	3	12	0.25	0.012769	0.990073	0.969	1	TS101_DICDI	MANA_DICDI	Q54S53_DICDI
biological_process	GO:0042244	spore wall assembly	3	10	0.3	0.818051	0.41763	1	1	SP85_DICDI	SP96_DICDI	Q1ZXE9_DICDI
biological_process	GO:0045324	late endosome to vacuole transport	3	12	0.25	0.445186	0.750807	1	1	VP13C_DICDI	CM2A2_DICDI	Q54EK0_DICDI
biological_process	GO:0006099	tricarboxylic acid cycle	3	28	0.107143	0.0836041	0.972639	1	1	IDHB_DICDI	C560_DICDI	DHTK1_DICDI
biological_process	GO:0034497	protein localization to phagophore assembly site	3	5	0.6	0.988377	0.084668	1	1	ATG9_DICDI	ATG18_DICDI	Q54SA0_DICDI
biological_process	GO:0042026	protein refolding	3	12	0.25	0.705971	0.549431	1	1	HS7C5_DICDI	HS7C4_DICDI	Q54XR6_DICDI
biological_process	GO:0006446	regulation of translational initiation	3	7	0.428571	0.763573	0.485581	1	1	IFKA_DICDI	IF4G_DICDI	GLE1_DICDI
biological_process	GO:0045842	positive regulation of mitotic metaphase/anaphase transition	3	9	0.333333	0.867639	0.346925	1	1	APC4_DICDI	APC3_DICDI	CDC16_DICDI
biological_process	GO:0006082	organic acid metabolic process	3	23	0.130435	0.000179601	0.999893	0.048	1	C516B_DICDI	C519B_DICDI	C516A_DICDI
biological_process	GO:0006911	phagocytosis, engulfment	3	13	0.230769	0.167895	0.92157	1	1	LMPA_DICDI	MYOF_DICDI	Q55CR5_DICDI
biological_process	GO:0090383	phagosome acidification	3	3	1	1	0.0123483	1	1	LMPA_DICDI	FYV1_DICDI	DYNA_DICDI
biological_process	GO:0036498	IRE1-mediated unfolded protein response	3	7	0.428571	0.945556	0.205643	1	1	IRLA_DICDI	IRLF_DICDI	IRLD_DICDI
biological_process	GO:0045010	actin nucleation	3	14	0.214286	0.898358	0.202879	1	1	FORA_DICDI	FORH_DICDI	WASH1_DICDI
biological_process	GO:0030968	endoplasmic reticulum unfolded protein response	3	11	0.272727	0.900567	0.220455	1	1	BZPC_DICDI	OTU1_DICDI	Q54SA0_DICDI
biological_process	GO:0006629	lipid metabolic process	3	45	0.0666667	0.0133135	0.990408	0.97	1	Y3730_DICDI	Q55EU9_DICDI	Q54GX3_DICDI
biological_process	GO:0060176	regulation of aggregation involved in sorocarp development	3	11	0.272727	0.749962	0.375128	1	1	GTAC_DICDI	HD_DICDI	TSUA_DICDI
biological_process	GO:0002183	cytoplasmic translational initiation	3	4	0.75	0.936921	0.140649	1	1	EIF3I_DICDI	EIF3M_DICDI	EI2BG_DICDI
biological_process	GO:0006400	tRNA modification	3	23	0.130435	0.00617887	0.997604	0.778	1	SYAM_DICDI	IPT_DICDI	Q555X7_DICDI
biological_process	GO:0046855	inositol phosphate dephosphorylation	3	8	0.375	0.910625	0.275404	1	1	Q54W40_DICDI	Q54CH3_DICDI	Q54D97_DICDI
biological_process	GO:0018107	peptidyl-threonine phosphorylation	3	11	0.272727	0.705971	0.549431	1	1	YAKA_DICDI	Y0444_DICDI	DYRK1_DICDI
biological_process	GO:0009992	cellular water homeostasis	3	6	0.5	0.971508	0.140844	1	1	AP2A2_DICDI	Q54Y50_DICDI	C7FZZ0_DICDI
biological_process	GO:0036228	protein localization to nuclear inner membrane	3	3	1	1	0.0123483	1	1	NUP54_DICDI	Q54F20_DICDI	Q54XC5_DICDI
biological_process	GO:0042254	ribosome biogenesis	3	11	0.272727	5.80525e-05	0.999974	0.009	1	Q75JJ6_DICDI	Q54KG8_DICDI	Q86B10_DICDI
biological_process	GO:0009736	cytokinin-activated signaling pathway	3	4	0.75	0.997149	0.040841	1	1	CYAD_DICDI	DHKA_DICDI	DHKB_DICDI
biological_process	GO:0071230	cellular response to amino acid stimulus	3	8	0.375	0.964356	0.132361	1	1	LTOR5_DICDI	RPTOR_DICDI	Y1625_DICDI
biological_process	GO:0051645	Golgi localization	3	6	0.5	0.945556	0.205643	1	1	COPD_DICDI	DYIN_DICDI	Q54G01_DICDI
biological_process	GO:0045292	mRNA cis splicing, via spliceosome	3	14	0.214286	0.645315	0.577927	1	1	SF3A1_DICDI	NCBP1_DICDI	Q86AS4_DICDI
biological_process	GO:0048268	clathrin coat assembly	3	4	0.75	0.997149	0.040841	1	1	CLH_DICDI	Q1ZXE9_DICDI	Q54Y50_DICDI
biological_process	GO:0034427	nuclear-transcribed mRNA catabolic process, exonucleolytic, 3'-5'	3	11	0.272727	0.878778	0.294029	1	1	Q54HV0_DICDI	Q55BB0_DICDI	Q55CE4_DICDI
biological_process	GO:0051272	positive regulation of cellular component movement	3	3	1	0.945556	0.205643	1	1	GBPC_DICDI	PTEN_DICDI	GBPD_DICDI
biological_process	GO:0046579	positive regulation of Ras protein signal transduction	3	9	0.333333	0.867639	0.346925	1	1	GBPC_DICDI	SCAA_DICDI	Q55G82_DICDI
biological_process	GO:0030245	cellulose catabolic process	3	10	0.3	0.818051	0.41763	1	1	Q55FE6_DICDI	Q54M04_DICDI	Q54VZ5_DICDI
biological_process	GO:0006644	phospholipid metabolic process	3	7	0.428571	0.467436	0.610683	1	1	FYV1_DICDI	PLDC_DICDI	PLDA_DICDI
biological_process	GO:0031286	negative regulation of sorocarp stalk cell differentiation	3	5	0.6	0.988377	0.084668	1	1	CUL2_DICDI	PSIA_DICDI	WARA_DICDI
biological_process	GO:0000737	DNA catabolic process, endonucleolytic	3	5	0.6	0.988377	0.084668	1	1	MUS81_DICDI	Q54PY6_DICDI	Q54PQ3_DICDI
biological_process	GO:0051642	centrosome localization	3	7	0.428571	0.964356	0.132361	1	1	LMNB1_DICDI	SUN1_DICDI	Q55BL8_DICDI
biological_process	GO:0010498	proteasomal protein catabolic process	3	14	0.214286	0.596492	0.475065	1	1	PSA6_DICDI	PSA4_DICDI	PSA1_DICDI
biological_process	GO:0070816	phosphorylation of RNA polymerase II C-terminal domain	3	8	0.375	0.867639	0.346925	1	1	TF2H3_DICDI	TF2H4_DICDI	TF2H1_DICDI
biological_process	GO:0000079	regulation of cyclin-dependent protein serine/threonine kinase activity	3	13	0.230769	0.587881	0.661848	1	1	Q54VE1_DICDI	C7G050_DICDI	Q75J86_DICDI
biological_process	GO:0000002	mitochondrial genome maintenance	3	4	0.75	0.971508	0.140844	1	1	YME2_DICDI	Q54Z42_DICDI	Q54B92_DICDI
biological_process	GO:0007064	mitotic sister chromatid cohesion	3	7	0.428571	0.945165	0.143089	1	1	SMC3_DICDI	PDS5_DICDI	Q54E85_DICDI
biological_process	GO:0007029	endoplasmic reticulum organization	3	9	0.333333	0.542651	0.67219	1	1	SEC31_DICDI	Q8T2J5_DICDI	Q556P7_DICDI
biological_process	GO:0007033	vacuole organization	3	6	0.5	0.867005	0.191758	1	1	VPS11_DICDI	CLH_DICDI	Q55CS3_DICDI
biological_process	GO:0032012	regulation of ARF protein signal transduction	3	6	0.5	0.971508	0.140844	1	1	Q86KG9_DICDI	Q54FL9_DICDI	Q556T7_DICDI
biological_process	GO:0006635	fatty acid beta-oxidation	3	16	0.1875	0.0987611	0.966613	1	1	ABCD3_DICDI	AUHM_DICDI	ABCD2_DICDI
biological_process	GO:0006352	DNA-templated transcription, initiation	3	6	0.5	0.985089	0.0323874	1	1	TF2B_DICDI	Q54U85_DICDI	Q86I37_DICDI
biological_process	GO:0042144	vacuole fusion, non-autophagic	3	6	0.5	0.971508	0.140844	1	1	VPS11_DICDI	VPS16_DICDI	Q55CS3_DICDI
biological_process	GO:0002224	toll-like receptor signaling pathway	3	4	0.75	0.997149	0.040841	1	1	Q55GS9_DICDI	Q555H5_DICDI	Q54BH0_DICDI
biological_process	GO:0000076	DNA replication checkpoint signaling	3	8	0.375	0.705971	0.549431	1	1	Q54D34_DICDI	Q55E62_DICDI	Q54KW8_DICDI
biological_process	GO:0070973	protein localization to endoplasmic reticulum exit site	3	3	1	1	0.0123483	1	1	YETL_DICDI	Q54JP0_DICDI	Q55BR0_DICDI
biological_process	GO:0034087	establishment of mitotic sister chromatid cohesion	3	6	0.5	0.945556	0.205643	1	1	Q54PY6_DICDI	Q54E44_DICDI	Q86J15_DICDI
biological_process	GO:0071169	establishment of protein localization to chromatin	3	6	0.5	0.971508	0.140844	1	1	Q54PY6_DICDI	Q54E44_DICDI	Q86J15_DICDI
biological_process	GO:1990414	replication-born double-strand break repair via sister chromatid exchange	3	7	0.428571	0.945556	0.205643	1	1	Q54PY6_DICDI	Q54E44_DICDI	Q86J15_DICDI
biological_process	GO:0099041	vesicle tethering to Golgi	3	6	0.5	0.971508	0.140844	1	1	Q55AJ1_DICDI	Q54YR7_DICDI	Q54TJ5_DICDI
biological_process	GO:0019369	arachidonic acid metabolic process	3	9	0.333333	0.867639	0.346925	1	1	Q54DE7_DICDI	Q54QX6_DICDI	Q54QX5_DICDI
biological_process	GO:0016441	posttranscriptional gene silencing	3	3	1	0.988542	0.0371454	1	1	Q55DB7_DICDI	Q7KWS3_DICDI	Q54UI6_DICDI
biological_process	GO:0010608	posttranscriptional regulation of gene expression	3	4	0.75	0.928524	0.105192	1	1	Q54IH9_DICDI	Q54WL9_DICDI	Q54WA7_DICDI
biological_process	GO:0006044	N-acetylglucosamine metabolic process	3	6	0.5	0.945556	0.205643	1	1	Q75JV8_DICDI	Q559V6_DICDI	Q559V4_DICDI
biological_process	GO:0070212	protein poly-ADP-ribosylation	3	6	0.5	0.971508	0.140844	1	1	Q54HY5_DICDI	Q54E42_DICDI	Q55GU8_DICDI
biological_process	GO:0035066	positive regulation of histone acetylation	3	3	1	1	0.0123483	1	1	Q86KB4_DICDI	Q54C05_DICDI	Q54VX6_DICDI
biological_process	GO:0061462	protein localization to lysosome	2	5	0.4	0.859156	0.421162	1	1	LTOR5_DICDI	WASC4_DICDI
biological_process	GO:0051489	regulation of filopodium assembly	2	4	0.5	0.910625	0.275404	1	1	Q54WI0_DICDI	Q54B43_DICDI
biological_process	GO:0030011	maintenance of cell polarity	2	3	0.666667	0.987652	0.135671	1	1	PI3K2_DICDI	MYOF_DICDI
biological_process	GO:0050919	negative chemotaxis	2	4	0.5	0.859351	0.269814	1	1	PI3K2_DICDI	PTEN_DICDI
biological_process	GO:0045761	regulation of adenylate cyclase activity	2	4	0.5	0.959159	0.230501	1	1	PI3K2_DICDI	PTEN_DICDI
biological_process	GO:0022604	regulation of cell morphogenesis	2	3	0.666667	0.421538	0.752479	1	1	PI3K2_DICDI	PTEN_DICDI
biological_process	GO:0030242	autophagy of peroxisome	2	6	0.333333	0.859156	0.421162	1	1	Q54MY6_DICDI	Q8MMZ9_DICDI
biological_process	GO:0006646	phosphatidylethanolamine biosynthetic process	2	7	0.285714	0.653075	0.652623	1	1	EKIA_DICDI	C7FZZ9_DICDI
biological_process	GO:1902168	response to catechin	2	8	0.25	0.724596	0.584691	1	1	GBF_DICDI	CYAA_DICDI
biological_process	GO:0048837	sorocarp sorus development	2	9	0.222222	0.88248	0.186076	1	1	ATG9_DICDI	PKS1_DICDI
biological_process	GO:0072697	protein localization to cell cortex	2	4	0.5	0.794357	0.507369	1	1	PDE5_DICDI	PDE6_DICDI
biological_process	GO:0006273	lagging strand elongation	2	5	0.4	0.971508	0.140844	1	1	DNLI1_DICDI	Q54E19_DICDI
biological_process	GO:0031929	TOR signaling	2	5	0.4	0.910843	0.16574	1	1	PK2_DICDI	RPTOR_DICDI
biological_process	GO:0009408	response to heat	2	12	0.166667	0.14949	0.954881	1	1	RTOA_DICDI	Q54XR6_DICDI
biological_process	GO:0006614	SRP-dependent cotranslational protein targeting to membrane	2	9	0.222222	0.450569	0.803971	1	1	SRP68_DICDI	Q55A40_DICDI
biological_process	GO:0008655	pyrimidine-containing compound salvage	2	11	0.181818	0.338152	0.869157	1	1	Q559S7_DICDI	Q54JJ1_DICDI
biological_process	GO:0030951	establishment or maintenance of microtubule cytoskeleton polarity	2	2	1	1	0.0534558	1	1	MTAA_DICDI	Q7KWK7_DICDI
biological_process	GO:0046785	microtubule polymerization	2	2	1	0.986692	0.0579788	1	1	MTAA_DICDI	Q7KWK7_DICDI
biological_process	GO:0000956	nuclear-transcribed mRNA catabolic process	2	9	0.222222	0.970426	0.0561558	1	1	Q54GU2_DICDI	Q75JF5_DICDI
biological_process	GO:0000027	ribosomal large subunit assembly	2	17	0.117647	0.210212	0.93039	1	1	RLA0_DICDI	MDN1_DICDI
biological_process	GO:0042273	ribosomal large subunit biogenesis	2	22	0.0909091	0.0124348	0.995675	0.968	1	WDR12_DICDI	Q54Y38_DICDI
biological_process	GO:0061025	membrane fusion	2	3	0.666667	0.0937449	0.953343	1	1	RTOA_DICDI	Q553R1_DICDI
biological_process	GO:0032781	positive regulation of ATP-dependent activity	2	3	0.666667	0.997149	0.040841	1	1	PAKB_DICDI	AHSA_DICDI
biological_process	GO:1902463	protein localization to cell leading edge	2	3	0.666667	0.987652	0.135671	1	1	PAKB_DICDI	HD_DICDI
biological_process	GO:0006895	Golgi to endosome transport	2	5	0.4	0.915332	0.327722	1	1	AP1G_DICDI	Q54C68_DICDI
biological_process	GO:0045165	cell fate commitment	2	3	0.666667	0.724596	0.584691	1	1	RBLA_DICDI	BTG_DICDI
biological_process	GO:0016339	calcium-dependent cell-cell adhesion via plasma membrane cell adhesion molecules	2	7	0.285714	0.724596	0.584691	1	1	HD_DICDI	PAXB_DICDI
biological_process	GO:0017157	regulation of exocytosis	2	6	0.333333	0.913387	0.236427	1	1	Q54EY0_DICDI	Q54GV1_DICDI
biological_process	GO:0007265	Ras protein signal transduction	2	20	0.1	0.319347	0.784057	1	1	GEFB_DICDI	GEFQ_DICDI
biological_process	GO:0051270	regulation of cellular component movement	2	5	0.4	0.948481	0.127383	1	1	MPL1_DICDI	RGAP1_DICDI
biological_process	GO:0043052	thermotaxis	2	7	0.285714	0.794357	0.507369	1	1	GEFE_DICDI	GEFL_DICDI
biological_process	GO:0008360	regulation of cell shape	2	22	0.0909091	0.0871244	0.976808	1	1	CYAA_DICDI	RACG_DICDI
biological_process	GO:0035999	tetrahydrofolate interconversion	2	8	0.25	0.724596	0.584691	1	1	Q54G53_DICDI	Q54RI8_DICDI
biological_process	GO:0006506	GPI anchor biosynthetic process	2	22	0.0909091	0.0273609	0.994118	0.999	1	PIGL_DICDI	Q551Y7_DICDI
biological_process	GO:0070177	contractile vacuole discharge	2	8	0.25	0.818051	0.41763	1	1	SEC1_DICDI	EXOC6_DICDI
biological_process	GO:0007009	plasma membrane organization	2	2	1	0.705971	0.549431	1	1	SEC1_DICDI	C7FZZ0_DICDI
biological_process	GO:0009411	response to UV	2	9	0.222222	0.769497	0.400598	1	1	Q54T56_DICDI	Q54X37_DICDI
biological_process	GO:0046999	regulation of conjugation	2	8	0.25	0.724596	0.584691	1	1	TMCB_DICDI	Q54IC6_DICDI
biological_process	GO:0016236	macroautophagy	2	12	0.166667	0.660564	0.474285	1	1	VP13C_DICDI	Q54SA0_DICDI
biological_process	GO:0002181	cytoplasmic translation	2	23	0.0869565	0.344383	0.763715	1	1	RLA0_DICDI	DRG2_DICDI
biological_process	GO:0016558	protein import into peroxisome matrix	2	6	0.333333	0.867639	0.346925	1	1	PEX10_DICDI	PEX1_DICDI
biological_process	GO:0032968	positive regulation of transcription elongation from RNA polymerase II promoter	2	7	0.285714	0.794357	0.507369	1	1	Q55A48_DICDI	Q555G9_DICDI
biological_process	GO:1901263	positive regulation of sorocarp spore cell differentiation	2	3	0.666667	0.987652	0.135671	1	1	STK11_DICDI	PSIA_DICDI
biological_process	GO:1904263	positive regulation of TORC1 signaling	2	5	0.4	0.915332	0.327722	1	1	SEC13_DICDI	LTOR5_DICDI
biological_process	GO:0006605	protein targeting	2	8	0.25	0.345487	0.741288	1	1	VPS36_DICDI	Q55FG6_DICDI
biological_process	GO:0009086	methionine biosynthetic process	2	6	0.333333	0.58237	0.711372	1	1	METH_DICDI	METE_DICDI
biological_process	GO:0043484	regulation of RNA splicing	2	4	0.5	0.910625	0.275404	1	1	Q54PW8_DICDI	Q54YS7_DICDI
biological_process	GO:0043171	peptide catabolic process	2	5	0.4	0.724596	0.584691	1	1	LKHA4_DICDI	Q54MN6_DICDI
biological_process	GO:0000915	actomyosin contractile ring assembly	2	2	1	1	0.0534558	1	1	LVSA_DICDI	CLH_DICDI
biological_process	GO:0033962	P-body assembly	2	9	0.222222	0.653075	0.652623	1	1	Q54U48_DICDI	Q55F60_DICDI
biological_process	GO:0034063	stress granule assembly	2	5	0.4	0.915332	0.327722	1	1	ATX2_DICDI	Q54U48_DICDI
biological_process	GO:0034620	cellular response to unfolded protein	2	7	0.285714	0.919018	0.170483	1	1	HS7C5_DICDI	HS7C4_DICDI
biological_process	GO:0008033	tRNA processing	2	24	0.0833333	0.00103713	0.999589	0.229	1	Q86JH5_DICDI	Q54W23_DICDI
biological_process	GO:0031158	negative regulation of aggregate size involved in sorocarp development	2	6	0.333333	0.859156	0.421162	1	1	IFKA_DICDI	CF60_DICDI
biological_process	GO:1905345	protein localization to cleavage furrow	2	7	0.285714	0.794357	0.507369	1	1	ICPA_DICDI	DYNA_DICDI
biological_process	GO:0030705	cytoskeleton-dependent intracellular transport	2	4	0.5	0.982777	0.0479035	1	1	HOOK_DICDI	KIF1_DICDI
biological_process	GO:0007091	metaphase/anaphase transition of mitotic cell cycle	2	7	0.285714	0.779545	0.406313	1	1	APC3_DICDI	CDC16_DICDI
biological_process	GO:0046689	response to mercury ion	2	18	0.111111	0.177646	0.943894	1	1	WDR12_DICDI	Q54NV9_DICDI
biological_process	GO:0000290	deadenylation-dependent decapping of nuclear-transcribed mRNA	2	8	0.25	0.724596	0.584691	1	1	Q55F60_DICDI	Q54R87_DICDI
biological_process	GO:0017183	peptidyl-diphthamide biosynthetic process from peptidyl-histidine	2	10	0.2	0.58237	0.711372	1	1	DPH2_DICDI	Q54Y82_DICDI
biological_process	GO:0007346	regulation of mitotic cell cycle	2	7	0.285714	0.96736	0.0623193	1	1	Q55BL8_DICDI	C7G050_DICDI
biological_process	GO:0031268	pseudopodium organization	2	4	0.5	0.994521	0.0167229	1	1	FORH_DICDI	Q86KX8_DICDI
biological_process	GO:0048388	endosomal lumen acidification	2	5	0.4	0.915332	0.327722	1	1	RTOA_DICDI	ABCG2_DICDI
biological_process	GO:0007094	mitotic spindle assembly checkpoint signaling	2	6	0.333333	0.859156	0.421162	1	1	BUB1_DICDI	Q55CA1_DICDI
biological_process	GO:0031037	myosin II filament disassembly	2	6	0.333333	0.794357	0.507369	1	1	MHCKD_DICDI	Q551V8_DICDI
biological_process	GO:0006627	protein processing involved in protein targeting to mitochondrion	2	6	0.333333	0.859156	0.421162	1	1	MPPA1_DICDI	C7G061_DICDI
biological_process	GO:0010737	protein kinase A signaling	2	5	0.4	0.910625	0.275404	1	1	BZPR_DICDI	Q54K15_DICDI
biological_process	GO:0006334	nucleosome assembly	2	16	0.125	0.215719	0.912876	1	1	Q54JS6_DICDI	Q55A48_DICDI
biological_process	GO:0035020	regulation of Rac protein signal transduction	2	5	0.4	0.915332	0.327722	1	1	GACII_DICDI	GACG_DICDI
biological_process	GO:0043666	regulation of phosphoprotein phosphatase activity	2	5	0.4	0.724596	0.584691	1	1	HD_DICDI	Q75JC0_DICDI
biological_process	GO:0031048	heterochromatin assembly by small RNA	2	4	0.5	0.945556	0.205643	1	1	Q869R3_DICDI	Q54XT3_DICDI
biological_process	GO:0043570	maintenance of DNA repeat elements	2	3	0.666667	0.971508	0.140844	1	1	MSH3_DICDI	MSH6_DICDI
biological_process	GO:0031287	positive regulation of sorocarp stalk cell differentiation	2	4	0.5	0.959159	0.230501	1	1	DIMA_DICDI	GTAG_DICDI
biological_process	GO:0006379	mRNA cleavage	2	6	0.333333	0.818051	0.41763	1	1	CPSF2_DICDI	Q54WL8_DICDI
biological_process	GO:0098789	pre-mRNA cleavage required for polyadenylation	2	6	0.333333	0.859156	0.421162	1	1	CPSF2_DICDI	Q54NB8_DICDI
biological_process	GO:0006171	cAMP biosynthetic process	2	3	0.666667	0.987652	0.135671	1	1	CYAD_DICDI	CYAA_DICDI
biological_process	GO:0016310	phosphorylation	2	9	0.222222	0.94388	0.0758862	1	1	CYAD_DICDI	Q75JX1_DICDI
biological_process	GO:0007162	negative regulation of cell adhesion	2	2	1	0.988377	0.084668	1	1	CTNA_DICDI	Q54KK9_DICDI
biological_process	GO:0000302	response to reactive oxygen species	2	5	0.4	0.68823	0.468337	1	1	CATB_DICDI	ROCO4_DICDI
biological_process	GO:0006268	DNA unwinding involved in DNA replication	2	8	0.25	0.724596	0.584691	1	1	Q54RU0_DICDI	B0G0Y4_DICDI
biological_process	GO:0008154	actin polymerization or depolymerization	2	8	0.25	0.894808	0.149463	1	1	GNRA_DICDI	Q54EF8_DICDI
biological_process	GO:0006266	DNA ligation	2	3	0.666667	0.859156	0.421162	1	1	DNLI1_DICDI	Q54E19_DICDI
biological_process	GO:0030835	negative regulation of actin filament depolymerization	2	4	0.5	0.391666	0.839541	1	1	COROB_DICDI	PIRA_DICDI
biological_process	GO:0140084	sexual macrocyst formation	2	4	0.5	0.959159	0.230501	1	1	G13A_DICDI	G13B_DICDI
biological_process	GO:0031285	regulation of sorocarp stalk cell differentiation	2	8	0.25	0.974271	0.07521	1	1	MRFA_DICDI	CYAA_DICDI
biological_process	GO:2000249	regulation of actin cytoskeleton reorganization	2	3	0.666667	0.987652	0.135671	1	1	PAXB_DICDI	Q54B43_DICDI
biological_process	GO:0051568	histone H3-K4 methylation	2	8	0.25	0.818051	0.41763	1	1	NUCMR_DICDI	Q55AQ4_DICDI
biological_process	GO:0006370	7-methylguanosine mRNA capping	2	6	0.333333	0.859156	0.421162	1	1	MTR1_DICDI	NCBP1_DICDI
biological_process	GO:0043248	proteasome assembly	2	8	0.25	0.58237	0.711372	1	1	PSMG4_DICDI	Q54JJ7_DICDI
biological_process	GO:0042594	response to starvation	2	8	0.25	0.986215	0.0205355	1	1	Y3337_DICDI	C7G014_DICDI
biological_process	GO:0072382	minus-end-directed vesicle transport along microtubule	2	2	1	1	0.0534558	1	1	DYHC_DICDI	DYIN_DICDI
biological_process	GO:0072718	response to cisplatin	2	8	0.25	0.724596	0.584691	1	1	PRKDC_DICDI	Q9GV71_DICDI
biological_process	GO:0016540	protein autoprocessing	2	5	0.4	0.915332	0.327722	1	1	MRFA_DICDI	Y9218_DICDI
biological_process	GO:0000375	RNA splicing, via transesterification reactions	2	7	0.285714	0.0389239	0.977438	1	1	PRP19_DICDI	Q54MH4_DICDI
biological_process	GO:0006086	acetyl-CoA biosynthetic process from pyruvate	2	4	0.5	0.959159	0.230501	1	1	ODP2_DICDI	Y1564_DICDI
biological_process	GO:0031271	lateral pseudopodium assembly	2	3	0.666667	0.987652	0.135671	1	1	CYAA_DICDI	GBPD_DICDI
biological_process	GO:0006817	phosphate ion transport	2	6	0.333333	0.724596	0.584691	1	1	SPXS3_DICDI	SPXS5_DICDI
biological_process	GO:0071476	cellular hypotonic response	2	11	0.181818	0.514419	0.761548	1	1	Q54DW4_DICDI	C7FZZ0_DICDI
biological_process	GO:0031573	mitotic intra-S DNA damage checkpoint signaling	2	7	0.285714	0.794357	0.507369	1	1	MUS81_DICDI	Q54PQ3_DICDI
biological_process	GO:0071901	negative regulation of protein serine/threonine kinase activity	2	5	0.4	0.913387	0.236427	1	1	PTEN_DICDI	Q54RX7_DICDI
biological_process	GO:0031047	gene silencing by RNA	2	4	0.5	0.988209	0.0353522	1	1	NCBP1_DICDI	Q54WH0_DICDI
biological_process	GO:0015693	magnesium ion transport	2	3	0.666667	0.987652	0.135671	1	1	Q55EN7_DICDI	Q553K8_DICDI
biological_process	GO:0071051	polyadenylation-dependent snoRNA 3'-end processing	2	6	0.333333	0.859156	0.421162	1	1	Q55AW0_DICDI	Q55BB0_DICDI
biological_process	GO:0046338	phosphatidylethanolamine catabolic process	2	7	0.285714	0.794357	0.507369	1	1	PLBLG_DICDI	PLBLA_DICDI
biological_process	GO:0031161	phosphatidylinositol catabolic process	2	7	0.285714	0.794357	0.507369	1	1	PLBLG_DICDI	PLBLA_DICDI
biological_process	GO:0009395	phospholipid catabolic process	2	7	0.285714	0.587881	0.661848	1	1	PLBLG_DICDI	PLBLA_DICDI
biological_process	GO:0044804	autophagy of nucleus	2	5	0.4	0.993801	0.0253736	1	1	ATG18_DICDI	Q54SA0_DICDI
biological_process	GO:0072344	rescue of stalled ribosome	2	10	0.2	0.58237	0.711372	1	1	LTN1_DICDI	ASCC3_DICDI
biological_process	GO:1990116	ribosome-associated ubiquitin-dependent protein catabolic process	2	5	0.4	0.915332	0.327722	1	1	LTN1_DICDI	ASCC3_DICDI
biological_process	GO:0070475	rRNA base methylation	2	9	0.222222	0.514419	0.761548	1	1	Q54TL4_DICDI	Q54J76_DICDI
biological_process	GO:0034461	uropod retraction	2	3	0.666667	0.987652	0.135671	1	1	TALA_DICDI	PTEN_DICDI
biological_process	GO:0000973	posttranscriptional tethering of RNA polymerase II gene DNA at nuclear periphery	2	4	0.5	0.959159	0.230501	1	1	NUPL_DICDI	Q54N06_DICDI
biological_process	GO:0000289	nuclear-transcribed mRNA poly(A) tail shortening	2	5	0.4	0.859156	0.421162	1	1	PAN3_DICDI	Q55AA8_DICDI
biological_process	GO:0032007	negative regulation of TOR signaling	2	6	0.333333	0.910625	0.275404	1	1	SESN_DICDI	Q54VB2_DICDI
biological_process	GO:1904262	negative regulation of TORC1 signaling	2	3	0.666667	0.987652	0.135671	1	1	SESN_DICDI	Q54NW3_DICDI
biological_process	GO:0031272	regulation of pseudopodium assembly	2	5	0.4	0.859156	0.421162	1	1	PTEN_DICDI	TSUA_DICDI
biological_process	GO:0016036	cellular response to phosphate starvation	2	4	0.5	0.959159	0.230501	1	1	SPXS3_DICDI	SPXS5_DICDI
biological_process	GO:0048278	vesicle docking	2	14	0.142857	0.762515	0.395081	1	1	Q55DR2_DICDI	Q54HM5_DICDI
biological_process	GO:0090502	RNA phosphodiester bond hydrolysis, endonucleolytic	2	6	0.333333	0.806672	0.354209	1	1	Q55GN1_DICDI	Q551B2_DICDI
biological_process	GO:0050793	regulation of developmental process	2	10	0.2	0.984071	0.0247406	1	1	GDT7_DICDI	GDT8_DICDI
biological_process	GO:0034508	centromere complex assembly	2	4	0.5	0.724596	0.584691	1	1	SUN1_DICDI	Q54RX7_DICDI
biological_process	GO:0006998	nuclear envelope organization	2	6	0.333333	0.794357	0.507369	1	1	SUN1_DICDI	Q54QQ7_DICDI
biological_process	GO:0071805	potassium ion transmembrane transport	2	6	0.333333	0.653075	0.652623	1	1	Y9144_DICDI	Q55CX3_DICDI
biological_process	GO:0051409	response to nitrosative stress	2	2	1	0.959159	0.230501	1	1	YAKA_DICDI	Q86AD8_DICDI
biological_process	GO:0001881	receptor recycling	2	4	0.5	0.971508	0.140844	1	1	Y5795_DICDI	Q553Q7_DICDI
biological_process	GO:0070072	vacuolar proton-transporting V-type ATPase complex assembly	2	4	0.5	0.959159	0.230501	1	1	Y4788_DICDI	Q54FJ8_DICDI
biological_process	GO:0071218	cellular response to misfolded protein	2	2	1	0.990971	0.0544442	1	1	Y5729_DICDI	Q54TF9_DICDI
biological_process	GO:0032958	inositol phosphate biosynthetic process	2	6	0.333333	0.794357	0.507369	1	1	Q54QM1_DICDI	Q54XR3_DICDI
biological_process	GO:0007228	positive regulation of hh target transcription factor activity	2	2	1	1	0.0534558	1	1	Y6627_DICDI	TSUA_DICDI
biological_process	GO:0032418	lysosome localization	2	5	0.4	0.915332	0.327722	1	1	BL1S2_DICDI	Q54RP3_DICDI
biological_process	GO:0048284	organelle fusion	2	2	1	0.464662	0.655617	1	1	VPS11_DICDI	Q55CS3_DICDI
biological_process	GO:0031123	RNA 3'-end processing	2	12	0.166667	0.770932	0.32174	1	1	C7G070_DICDI	Q54LG7_DICDI
biological_process	GO:0043486	histone exchange	2	6	0.333333	0.653075	0.652623	1	1	Q54IH7_DICDI	Q55GK2_DICDI
biological_process	GO:0051593	response to folic acid	2	3	0.666667	0.942507	0.125016	1	1	VP13F_DICDI	DRKD_DICDI
biological_process	GO:0045040	protein insertion into mitochondrial outer membrane	2	4	0.5	0.959159	0.230501	1	1	Y5576_DICDI	Q553N9_DICDI
biological_process	GO:0015910	long-chain fatty acid import into peroxisome	2	3	0.666667	0.987652	0.135671	1	1	ABCD3_DICDI	ABCD2_DICDI
biological_process	GO:0042760	very long-chain fatty acid catabolic process	2	3	0.666667	0.959159	0.230501	1	1	ABCD3_DICDI	ABCD2_DICDI
biological_process	GO:0006497	protein lipidation	2	2	1	0.00397865	0.998996	0.643	1	ATG18_DICDI	Q54SA0_DICDI
biological_process	GO:0044255	cellular lipid metabolic process	2	6	0.333333	0.204327	0.83121	1	1	Q75JA1_DICDI	Q54XL3_DICDI
biological_process	GO:0045943	positive regulation of transcription by RNA polymerase I	2	3	0.666667	0.987652	0.135671	1	1	HEAT1_DICDI	Q55CD3_DICDI
biological_process	GO:0042276	error-prone translesion synthesis	2	6	0.333333	0.859156	0.421162	1	1	DPOE2_DICDI	Q55AZ3_DICDI
biological_process	GO:0042795	snRNA transcription by RNA polymerase II	2	3	0.666667	0.987652	0.135671	1	1	Q555K3_DICDI	Q54MW3_DICDI
biological_process	GO:0042796	snRNA transcription by RNA polymerase III	2	3	0.666667	0.987652	0.135671	1	1	Q555K3_DICDI	Q54MW3_DICDI
biological_process	GO:0071596	ubiquitin-dependent protein catabolic process via the N-end rule pathway	2	8	0.25	0.724596	0.584691	1	1	Q54QZ3_DICDI	Q54IW6_DICDI
biological_process	GO:0046087	cytidine metabolic process	2	6	0.333333	0.794357	0.507369	1	1	Q559S7_DICDI	Q54JJ1_DICDI
biological_process	GO:0015743	malate transport	2	5	0.4	0.859156	0.421162	1	1	Q54TC0_DICDI	Q552V8_DICDI
biological_process	GO:0048478	replication fork protection	2	5	0.4	0.915332	0.327722	1	1	Q54TE8_DICDI	Q54KW8_DICDI
biological_process	GO:0030422	production of siRNA involved in RNA interference	2	5	0.4	0.915332	0.327722	1	1	Q7KWS3_DICDI	Q54UI6_DICDI
biological_process	GO:0010883	regulation of lipid storage	2	8	0.25	0.724596	0.584691	1	1	Q54YE0_DICDI	Q55DU6_DICDI
biological_process	GO:0001522	pseudouridine synthesis	2	5	0.4	0.125308	0.963791	1	1	Q75JJ6_DICDI	Q86JH5_DICDI
biological_process	GO:0007338	single fertilization	2	2	1	1	0.0534558	1	1	Q75JL6_DICDI	Q559R5_DICDI
biological_process	GO:0045717	negative regulation of fatty acid biosynthetic process	2	3	0.666667	0.987652	0.135671	1	1	Q86KB4_DICDI	Q54C05_DICDI
biological_process	GO:0072684	mitochondrial tRNA 3'-trailer cleavage, endonucleolytic	2	4	0.5	0.959159	0.230501	1	1	Q86IU3_DICDI	B0G112_DICDI
biological_process	GO:0007062	sister chromatid cohesion	2	4	0.5	0.974746	0.0690294	1	1	Q54E85_DICDI	Q54QR0_DICDI
biological_process	GO:0000972	transcription-dependent tethering of RNA polymerase II gene DNA at nuclear periphery	2	3	0.666667	0.990971	0.0544442	1	1	Q54F20_DICDI	Q54KA3_DICDI
biological_process	GO:0070897	transcription preinitiation complex assembly	2	2	1	0.993801	0.0253736	1	1	Q54U85_DICDI	Q86I37_DICDI
biological_process	GO:0007095	mitotic G2 DNA damage checkpoint signaling	2	3	0.666667	0.987652	0.135671	1	1	Q54BN2_DICDI	Q55D89_DICDI
biological_process	GO:0035067	negative regulation of histone acetylation	2	2	1	1	0.0534558	1	1	Q86KB4_DICDI	Q54C05_DICDI
biological_process	GO:0034405	response to fluid shear stress	2	2	1	1	0.0534558	1	1	Q558Y3_DICDI	Q54EY0_DICDI
biological_process	GO:0051315	attachment of mitotic spindle microtubules to kinetochore	2	3	0.666667	0.987652	0.135671	1	1	Q54WM1_DICDI	Q54QB4_DICDI
biological_process	GO:0036453	transitive RNA interference	2	3	0.666667	0.987652	0.135671	1	1	Q7KWS3_DICDI	Q54UI6_DICDI
biological_process	GO:0010032	meiotic chromosome condensation	2	3	0.666667	0.987652	0.135671	1	1	Q54DZ9_DICDI	Q54XY3_DICDI
biological_process	GO:0061621	canonical glycolysis	1	1	1	1	0.231273	1	1	PFKA_DICDI
biological_process	GO:0030388	fructose 1,6-bisphosphate metabolic process	1	3	0.333333	0.864329	0.545801	1	1	PFKA_DICDI
biological_process	GO:0006002	fructose 6-phosphate metabolic process	1	3	0.333333	0.864329	0.545801	1	1	PFKA_DICDI
biological_process	GO:0006007	glucose catabolic process	1	2	0.5	0.946544	0.409091	1	1	PFKA_DICDI
biological_process	GO:0031115	negative regulation of microtubule polymerization	1	1	1	1	0.231273	1	1	PFKA_DICDI
biological_process	GO:0006006	glucose metabolic process	1	4	0.25	0.14949	0.954881	1	1	PGM1_DICDI
biological_process	GO:0032147	activation of protein kinase activity	1	6	0.166667	0.450569	0.803971	1	1	PI3K2_DICDI
biological_process	GO:0032148	activation of protein kinase B activity	1	7	0.142857	0.492631	0.841541	1	1	RIP3_DICDI
biological_process	GO:0031034	myosin filament assembly	1	6	0.166667	0.829517	0.310715	1	1	2AAA_DICDI
biological_process	GO:0007219	Notch signaling pathway	1	5	0.2	0.672278	0.731695	1	1	NICA_DICDI
biological_process	GO:0010467	gene expression	1	5	0.2	0.853845	0.163515	1	1	FORC_DICDI
biological_process	GO:0034394	protein localization to cell surface	1	5	0.2	0.578838	0.793802	1	1	SADA_DICDI
biological_process	GO:0072657	protein localization to membrane	1	5	0.2	0.127334	0.921345	1	1	MYOG_DICDI
biological_process	GO:0050821	protein stabilization	1	8	0.125	0.415309	0.878234	1	1	SADA_DICDI
biological_process	GO:0033299	secretion of lysosomal enzymes	1	5	0.2	0.578838	0.793802	1	1	WASH1_DICDI
biological_process	GO:0000423	mitophagy	1	3	0.333333	0.864329	0.545801	1	1	PHB2_DICDI
biological_process	GO:0006661	phosphatidylinositol biosynthetic process	1	4	0.25	0.370203	0.75142	1	1	PI3K2_DICDI
biological_process	GO:1900027	regulation of ruffle assembly	1	2	0.5	0.946544	0.409091	1	1	PI3K2_DICDI
biological_process	GO:0008615	pyridoxine biosynthetic process	1	2	0.5	0.946544	0.409091	1	1	PNPO_DICDI
biological_process	GO:0009611	response to wounding	1	4	0.25	0.347377	0.906435	1	1	TS101_DICDI
biological_process	GO:0006541	glutamine metabolic process	1	11	0.0909091	0.196029	0.957564	1	1	PYR1_DICDI
biological_process	GO:0007193	adenylate cyclase-inhibiting G protein-coupled receptor signaling pathway	1	3	0.333333	0.864329	0.545801	1	1	TBC5B_DICDI
biological_process	GO:0006198	cAMP catabolic process	1	3	0.333333	0.864329	0.545801	1	1	PDE6_DICDI
biological_process	GO:0046069	cGMP catabolic process	1	3	0.333333	0.864329	0.545801	1	1	PDE5_DICDI
biological_process	GO:0061128	positive regulation of chemotaxis to cAMP by DIF-2	1	3	0.333333	0.864329	0.545801	1	1	DHKC_DICDI
biological_process	GO:0014067	negative regulation of phosphatidylinositol 3-kinase signaling	1	4	0.25	0.769499	0.650901	1	1	PDE5_DICDI
biological_process	GO:1905511	positive regulation of myosin II filament assembly	1	1	1	1	0.231273	1	1	PDE5_DICDI
biological_process	GO:0006275	regulation of DNA replication	1	5	0.2	0.942663	0.16115	1	1	SMC3_DICDI
biological_process	GO:2000480	negative regulation of cAMP-dependent protein kinase activity	1	2	0.5	0.946544	0.409091	1	1	PDE6_DICDI
biological_process	GO:0061118	regulation of positive chemotaxis to cAMP	1	5	0.2	0.391666	0.839541	1	1	PDE6_DICDI
biological_process	GO:0046580	negative regulation of Ras protein signal transduction	1	5	0.2	0.672278	0.731695	1	1	PK2_DICDI
biological_process	GO:0009056	catabolic process	1	1	1	0.0207238	0.983661	0.995	1	PTER_DICDI
biological_process	GO:0051321	meiotic cell cycle	1	5	0.2	0.909159	0.157238	1	1	SPC97_DICDI
biological_process	GO:0007020	microtubule nucleation	1	5	0.2	0.859156	0.421162	1	1	SPC97_DICDI
biological_process	GO:0030148	sphingolipid biosynthetic process	1	16	0.0625	0.0593859	0.981736	1	1	Y8928_DICDI
biological_process	GO:1902600	proton transmembrane transport	1	10	0.1	0.0117481	0.998628	0.959	1	Q557I5_DICDI
biological_process	GO:0034765	regulation of ion transmembrane transport	1	7	0.142857	0.238452	0.944765	1	1	CLCA_DICDI
biological_process	GO:0030490	maturation of SSU-rRNA	1	15	0.0666667	0.261513	0.850704	1	1	Q54K79_DICDI
biological_process	GO:0007035	vacuolar acidification	1	4	0.25	0.672278	0.731695	1	1	B0G145_DICDI
biological_process	GO:0002098	tRNA wobble uridine modification	1	18	0.0555556	0.0362093	0.994859	1	1	Q86H29_DICDI
biological_process	GO:0006552	leucine catabolic process	1	6	0.166667	0.578838	0.793802	1	1	AUHM_DICDI
biological_process	GO:0043409	negative regulation of MAPK cascade	1	6	0.166667	0.653075	0.652623	1	1	MPL1_DICDI
biological_process	GO:0048550	negative regulation of pinocytosis	1	3	0.333333	0.769499	0.650901	1	1	Q1ZXJ2_DICDI
biological_process	GO:0022407	regulation of cell-cell adhesion	1	4	0.25	0.794357	0.507369	1	1	RGAPB_DICDI
biological_process	GO:0045786	negative regulation of cell cycle	1	1	1	0.993306	0.0161683	1	1	RBLA_DICDI
biological_process	GO:2000134	negative regulation of G1/S transition of mitotic cell cycle	1	1	1	1	0.231273	1	1	RBLA_DICDI
biological_process	GO:0010389	regulation of G2/M transition of mitotic cell cycle	1	2	0.5	0.913387	0.236427	1	1	RBLA_DICDI
biological_process	GO:0045860	positive regulation of protein kinase activity	1	4	0.25	0.439793	0.725311	1	1	GBPC_DICDI
biological_process	GO:0010812	negative regulation of cell-substrate adhesion	1	3	0.333333	0.864329	0.545801	1	1	FRMA_DICDI
biological_process	GO:0060100	positive regulation of phagocytosis, engulfment	1	3	0.333333	0.864329	0.545801	1	1	FORG_DICDI
biological_process	GO:0051897	positive regulation of protein kinase B signaling	1	6	0.166667	0.578838	0.793802	1	1	GEFB_DICDI
biological_process	GO:0043407	negative regulation of MAP kinase activity	1	3	0.333333	0.864329	0.545801	1	1	MPL1_DICDI
biological_process	GO:1901262	negative regulation of sorocarp spore cell differentiation	1	2	0.5	0.946544	0.409091	1	1	HBX4_DICDI
biological_process	GO:1903666	positive regulation of asexual reproduction	1	4	0.25	0.769499	0.650901	1	1	RPTOR_DICDI
biological_process	GO:0030865	cortical cytoskeleton organization	1	20	0.05	0.86297	0.224583	1	1	RACG_DICDI
biological_process	GO:0043652	engulfment of apoptotic cell	1	17	0.0588235	0.0696101	0.988651	1	1	RACG_DICDI
biological_process	GO:2000114	regulation of establishment of cell polarity	1	2	0.5	0.946544	0.409091	1	1	Q54DW4_DICDI
biological_process	GO:0006421	asparaginyl-tRNA aminoacylation	1	2	0.5	0.946544	0.409091	1	1	SYNC_DICDI
biological_process	GO:0008277	regulation of G protein-coupled receptor signaling pathway	1	6	0.166667	0.829517	0.310715	1	1	YAKA_DICDI
biological_process	GO:0000028	ribosomal small subunit assembly	1	12	0.0833333	0.160459	0.967399	1	1	PWP2_DICDI
biological_process	GO:0071470	cellular response to osmotic stress	1	2	0.5	0.696659	0.5254	1	1	SEC1_DICDI
biological_process	GO:1902774	late endosome to lysosome transport	1	1	1	1	0.231273	1	1	SCAR_DICDI
biological_process	GO:2000601	positive regulation of Arp2/3 complex-mediated actin nucleation	1	2	0.5	0.946544	0.409091	1	1	SCAR_DICDI
biological_process	GO:0032780	negative regulation of ATP-dependent activity	1	2	0.5	0.864329	0.545801	1	1	SLOB2_DICDI
biological_process	GO:0043271	negative regulation of ion transport	1	2	0.5	0.864329	0.545801	1	1	SLOB2_DICDI
biological_process	GO:1902349	response to chloroquine	1	1	1	1	0.231273	1	1	TPP1_DICDI
biological_process	GO:0032496	response to lipopolysaccharide	1	2	0.5	0.946544	0.409091	1	1	TIRA_DICDI
biological_process	GO:0000395	mRNA 5'-splice site recognition	1	3	0.333333	0.864329	0.545801	1	1	Q54SW0_DICDI
biological_process	GO:0000387	spliceosomal snRNP assembly	1	12	0.0833333	0.247599	0.913849	1	1	Q86AS4_DICDI
biological_process	GO:0060359	response to ammonium ion	1	3	0.333333	0.864329	0.545801	1	1	DHKC_DICDI
biological_process	GO:0006207	'de novo' pyrimidine nucleobase biosynthetic process	1	4	0.25	0.769499	0.650901	1	1	PYR1_DICDI
biological_process	GO:0044205	'de novo' UMP biosynthetic process	1	3	0.333333	0.864329	0.545801	1	1	PYR1_DICDI
biological_process	GO:0006265	DNA topological change	1	4	0.25	0.769499	0.650901	1	1	TOP2M_DICDI
biological_process	GO:0001672	regulation of chromatin assembly or disassembly	1	3	0.333333	0.915332	0.327722	1	1	Q54WQ2_DICDI
biological_process	GO:0046513	ceramide biosynthetic process	1	9	0.111111	0.288628	0.928109	1	1	SGMD_DICDI
biological_process	GO:0046512	sphingosine biosynthetic process	1	8	0.125	0.415309	0.878234	1	1	Q75JX1_DICDI
biological_process	GO:0061098	positive regulation of protein tyrosine kinase activity	1	1	1	1	0.231273	1	1	STK11_DICDI
biological_process	GO:0000288	nuclear-transcribed mRNA catabolic process, deadenylation-dependent decay	1	2	0.5	0.730186	0.446757	1	1	Q75JL4_DICDI
biological_process	GO:0034402	recruitment of 3'-end processing factors to RNA polymerase II holoenzyme complex	1	2	0.5	0.946544	0.409091	1	1	Q555G9_DICDI
biological_process	GO:0000447	endonucleolytic cleavage in ITS1 to separate SSU-rRNA from 5.8S rRNA and LSU-rRNA from tricistronic rRNA transcript (SSU-rRNA, 5.8S rRNA, LSU-rRNA)	1	6	0.166667	0.578838	0.793802	1	1	Q54W23_DICDI
biological_process	GO:0032527	protein exit from endoplasmic reticulum	1	1	1	0.578838	0.793802	1	1	SEC13_DICDI
biological_process	GO:0006801	superoxide metabolic process	1	3	0.333333	0.130843	0.974956	1	1	NCFA_DICDI
biological_process	GO:0015914	phospholipid transport	1	4	0.25	0.890006	0.253262	1	1	SLMO_DICDI
biological_process	GO:0016571	histone methylation	1	3	0.333333	0.274689	0.856795	1	1	SET1_DICDI
biological_process	GO:0040029	regulation of gene expression, epigenetic	1	1	1	1	0.231273	1	1	SET1_DICDI
biological_process	GO:0043328	protein transport to vacuole involved in ubiquitin-dependent protein catabolic process via the multivesicular body sorting pathway	1	5	0.2	0.672278	0.731695	1	1	VPS36_DICDI
biological_process	GO:0071786	endoplasmic reticulum tubular network organization	1	2	0.5	0.946544	0.409091	1	1	Q54GT5_DICDI
biological_process	GO:0061024	membrane organization	1	5	0.2	0.695377	0.37076	1	1	Q552K7_DICDI
biological_process	GO:0001778	plasma membrane repair	1	7	0.142857	0.492631	0.841541	1	1	TS101_DICDI
biological_process	GO:0040008	regulation of growth	1	3	0.333333	0.964356	0.132361	1	1	TS101_DICDI
biological_process	GO:0042558	pteridine-containing compound metabolic process	1	1	1	0.445186	0.750807	1	1	METH_DICDI
biological_process	GO:0007190	activation of adenylate cyclase activity	1	7	0.142857	0.492631	0.841541	1	1	RIP3_DICDI
biological_process	GO:0038203	TORC2 signaling	1	3	0.333333	0.867639	0.346925	1	1	RIP3_DICDI
biological_process	GO:0006189	'de novo' IMP biosynthetic process	1	7	0.142857	0.492631	0.841541	1	1	PURCE_DICDI
biological_process	GO:0006816	calcium ion transport	1	8	0.125	0.14949	0.954881	1	1	IPLA_DICDI
biological_process	GO:0099614	protein localization to spore cell wall	1	1	1	1	0.231273	1	1	SP85_DICDI
biological_process	GO:0045047	protein targeting to ER	1	7	0.142857	0.445186	0.750807	1	1	SPCS3_DICDI
biological_process	GO:0006596	polyamine biosynthetic process	1	2	0.5	0.769499	0.650901	1	1	Q75JL7_DICDI
biological_process	GO:0036360	sorocarp stalk morphogenesis	1	7	0.142857	0.492631	0.841541	1	1	EXPL3_DICDI
biological_process	GO:0008333	endosome to lysosome transport	1	8	0.125	0.415309	0.878234	1	1	Q54RP3_DICDI
biological_process	GO:0001919	regulation of receptor recycling	1	2	0.5	0.946544	0.409091	1	1	Y1625_DICDI
biological_process	GO:0007189	adenylate cyclase-activating G protein-coupled receptor signaling pathway	1	14	0.0714286	0.815842	0.277387	1	1	CYAA_DICDI
biological_process	GO:0090258	negative regulation of mitochondrial fission	1	1	1	1	0.231273	1	1	FTSZB_DICDI
biological_process	GO:0010637	negative regulation of mitochondrial fusion	1	1	1	1	0.231273	1	1	FTSZB_DICDI
biological_process	GO:0019370	leukotriene biosynthetic process	1	1	1	1	0.231273	1	1	LKHA4_DICDI
biological_process	GO:0006734	NADH metabolic process	1	4	0.25	0.867639	0.346925	1	1	Q54N32_DICDI
biological_process	GO:0000460	maturation of 5.8S rRNA	1	9	0.111111	0.189703	0.916396	1	1	NOL9_DICDI
biological_process	GO:0000470	maturation of LSU-rRNA	1	11	0.0909091	0.136485	0.950621	1	1	Q54TL4_DICDI
biological_process	GO:0140026	contractile vacuole dissociation from plasma membrane	1	1	1	1	0.231273	1	1	LVSA_DICDI
biological_process	GO:0055070	copper ion homeostasis	1	5	0.2	0.347377	0.906435	1	1	Q55DN5_DICDI
biological_process	GO:0002188	translation reinitiation	1	2	0.5	0.946544	0.409091	1	1	EIF3A_DICDI
biological_process	GO:0019556	histidine catabolic process to glutamate and formamide	1	5	0.2	0.672278	0.731695	1	1	HUTU_DICDI
biological_process	GO:0019557	histidine catabolic process to glutamate and formate	1	5	0.2	0.672278	0.731695	1	1	HUTU_DICDI
biological_process	GO:0043967	histone H4 acetylation	1	8	0.125	0.347377	0.906435	1	1	Q54IH7_DICDI
biological_process	GO:0030150	protein import into mitochondrial matrix	1	12	0.0833333	0.196029	0.957564	1	1	Q558Z1_DICDI
biological_process	GO:0007214	gamma-aminobutyric acid signaling pathway	1	4	0.25	0.769499	0.650901	1	1	GPA7_DICDI
biological_process	GO:1905362	negative regulation of endosomal vesicle fusion	1	1	1	1	0.231273	1	1	LVSB_DICDI
biological_process	GO:0016998	cell wall macromolecule catabolic process	1	8	0.125	0.415309	0.878234	1	1	LYSG3_DICDI
biological_process	GO:0019835	cytolysis	1	13	0.0769231	0.125308	0.963791	1	1	LYSG3_DICDI
biological_process	GO:0009253	peptidoglycan catabolic process	1	12	0.0833333	0.196029	0.957564	1	1	LYSG3_DICDI
biological_process	GO:0051490	negative regulation of filopodium assembly	1	3	0.333333	0.864329	0.545801	1	1	PAKD_DICDI
biological_process	GO:0016050	vesicle organization	1	7	0.142857	0.94643	0.0801813	1	1	C7FZZ0_DICDI
biological_process	GO:0048255	mRNA stabilization	1	2	0.5	0.946544	0.409091	1	1	IFKA_DICDI
biological_process	GO:0006744	ubiquinone biosynthetic process	1	20	0.05	0.0406507	0.99066	1	1	Q54GW2_DICDI
biological_process	GO:0000165	MAPK cascade	1	3	0.333333	0.531663	0.634842	1	1	ERK1_DICDI
biological_process	GO:0009612	response to mechanical stimulus	1	3	0.333333	0.859156	0.421162	1	1	ICPA_DICDI
biological_process	GO:0051231	spindle elongation	1	1	1	0.959159	0.230501	1	1	KIF13_DICDI
biological_process	GO:0051764	actin crosslink formation	1	6	0.166667	0.578838	0.793802	1	1	ACTNA_DICDI
biological_process	GO:0000266	mitochondrial fission	1	3	0.333333	0.915332	0.327722	1	1	CLU_DICDI
biological_process	GO:0012501	programmed cell death	1	7	0.142857	0.988881	0.0287616	1	1	DIMA_DICDI
biological_process	GO:0070979	protein K11-linked ubiquitination	1	6	0.166667	0.578838	0.793802	1	1	APC4_DICDI
biological_process	GO:0032509	endosome transport via multivesicular body sorting pathway	1	4	0.25	0.247599	0.913849	1	1	CM2A2_DICDI
biological_process	GO:0008654	phospholipid biosynthetic process	1	8	0.125	0.0194173	0.990499	0.995	1	CAPTB_DICDI
biological_process	GO:0051131	chaperone-mediated protein complex assembly	1	6	0.166667	0.578838	0.793802	1	1	BCS1A_DICDI
biological_process	GO:0050830	defense response to Gram-positive bacterium	1	7	0.142857	0.492631	0.841541	1	1	LMPA_DICDI
biological_process	GO:0006548	histidine catabolic process	1	2	0.5	0.672278	0.731695	1	1	HUTU_DICDI
biological_process	GO:0030244	cellulose biosynthetic process	1	3	0.333333	0.864329	0.545801	1	1	IPLA_DICDI
biological_process	GO:0022408	negative regulation of cell-cell adhesion	1	1	1	1	0.231273	1	1	FRMA_DICDI
biological_process	GO:1904171	negative regulation of bleb assembly	1	1	1	1	0.231273	1	1	FORA_DICDI
biological_process	GO:0051638	barbed-end actin filament uncapping	1	1	1	1	0.231273	1	1	FORH_DICDI
biological_process	GO:0006879	cellular iron ion homeostasis	1	7	0.142857	0.288628	0.928109	1	1	NRAM1_DICDI
biological_process	GO:0006811	ion transport	1	5	0.2	0.0143222	0.992446	0.975	1	Q55CX3_DICDI
biological_process	GO:0034729	histone H3-K79 methylation	1	1	1	1	0.231273	1	1	DOT1L_DICDI
biological_process	GO:2000677	regulation of transcription regulatory region DNA binding	1	1	1	1	0.231273	1	1	DOT1L_DICDI
biological_process	GO:0031509	subtelomeric heterochromatin assembly	1	1	1	1	0.231273	1	1	DOT1L_DICDI
biological_process	GO:0006287	base-excision repair, gap-filling	1	2	0.5	0.946544	0.409091	1	1	DPOE1_DICDI
biological_process	GO:0045004	DNA replication proofreading	1	2	0.5	0.946544	0.409091	1	1	DPOE1_DICDI
biological_process	GO:0006297	nucleotide-excision repair, DNA gap filling	1	4	0.25	0.769499	0.650901	1	1	DPOE1_DICDI
biological_process	GO:0006048	UDP-N-acetylglucosamine biosynthetic process	1	5	0.2	0.672278	0.731695	1	1	Q54TE6_DICDI
biological_process	GO:0006749	glutathione metabolic process	1	25	0.04	0.00465969	0.999524	0.697	1	Q54C73_DICDI
biological_process	GO:0050982	detection of mechanical stimulus	1	4	0.25	0.769499	0.650901	1	1	Y2801_DICDI
biological_process	GO:0009396	folic acid-containing compound biosynthetic process	1	2	0.5	0.492631	0.841541	1	1	Q54RI8_DICDI
biological_process	GO:0000388	spliceosome conformational change to release U4 (or U4atac) and U1 (or U11)	1	1	1	1	0.231273	1	1	HELCL_DICDI
biological_process	GO:0032434	regulation of proteasomal ubiquitin-dependent protein catabolic process	1	2	0.5	0.463857	0.719014	1	1	UFL1_DICDI
biological_process	GO:0044773	mitotic DNA damage checkpoint signaling	1	5	0.2	0.890006	0.253262	1	1	FHKB_DICDI
biological_process	GO:0019346	transsulfuration	1	3	0.333333	0.864329	0.545801	1	1	Q54RW8_DICDI
biological_process	GO:0031848	protection from non-homologous end joining at telomere	1	1	1	1	0.231273	1	1	DCR1_DICDI
biological_process	GO:0000413	protein peptidyl-prolyl isomerization	1	15	0.0666667	0.106332	0.980763	1	1	Q54WQ9_DICDI
biological_process	GO:0006538	glutamate catabolic process	1	4	0.25	0.672278	0.731695	1	1	GLUD2_DICDI
biological_process	GO:0019551	glutamate catabolic process to 2-oxoglutarate	1	1	1	1	0.231273	1	1	GLUD2_DICDI
biological_process	GO:0042593	glucose homeostasis	1	6	0.166667	0.238452	0.944765	1	1	CTNA_DICDI
biological_process	GO:0106072	negative regulation of adenylate cyclase-activating G protein-coupled receptor signaling pathway	1	2	0.5	0.946544	0.409091	1	1	Q54L33_DICDI
biological_process	GO:0010754	negative regulation of cGMP-mediated signaling	1	2	0.5	0.946544	0.409091	1	1	CTNA_DICDI
biological_process	GO:0045910	negative regulation of DNA recombination	1	3	0.333333	0.769499	0.650901	1	1	MSH6_DICDI
biological_process	GO:0016584	nucleosome positioning	1	3	0.333333	0.864329	0.545801	1	1	Q54CF8_DICDI
biological_process	GO:0006102	isocitrate metabolic process	1	4	0.25	0.769499	0.650901	1	1	IDHB_DICDI
biological_process	GO:0031036	myosin II filament assembly	1	2	0.5	0.900567	0.220455	1	1	PAKA_DICDI
biological_process	GO:0045859	regulation of protein kinase activity	1	6	0.166667	0.698337	0.413777	1	1	RIP3_DICDI
biological_process	GO:0007131	reciprocal meiotic recombination	1	10	0.1	0.647349	0.536143	1	1	MSH3_DICDI
biological_process	GO:0009058	biosynthetic process	1	8	0.125	0.187148	0.8319	1	1	ALAM_DICDI
biological_process	GO:0055129	L-proline biosynthetic process	1	3	0.333333	0.864329	0.545801	1	1	P5CR1_DICDI
biological_process	GO:0031507	heterochromatin assembly	1	7	0.142857	0.856911	0.303341	1	1	H2AV2_DICDI
biological_process	GO:0072507	divalent inorganic cation homeostasis	1	1	1	0.562508	0.618739	1	1	HD_DICDI
biological_process	GO:0051592	response to calcium ion	1	6	0.166667	0.705971	0.549431	1	1	HD_DICDI
biological_process	GO:0035864	response to potassium ion	1	2	0.5	0.946544	0.409091	1	1	HD_DICDI
biological_process	GO:0097231	cell motility in response to calcium ion	1	1	1	1	0.231273	1	1	IPLA_DICDI
biological_process	GO:0034670	chemotaxis to arachidonic acid	1	1	1	1	0.231273	1	1	IPLA_DICDI
biological_process	GO:0051209	release of sequestered calcium ion into cytosol	1	1	1	0.864329	0.545801	1	1	IPLA_DICDI
biological_process	GO:0033314	mitotic DNA replication checkpoint signaling	1	6	0.166667	0.578838	0.793802	1	1	Q54D34_DICDI
biological_process	GO:0072659	protein localization to plasma membrane	1	7	0.142857	0.422073	0.789788	1	1	Q54GC3_DICDI
biological_process	GO:0051601	exocyst localization	1	1	1	0.864329	0.545801	1	1	EXOC3_DICDI
biological_process	GO:0070681	glutaminyl-tRNAGln biosynthesis via transamidation	1	3	0.333333	0.864329	0.545801	1	1	GATB_DICDI
biological_process	GO:0000083	regulation of transcription involved in G1/S transition of mitotic cell cycle	1	4	0.25	0.769499	0.650901	1	1	Y2550_DICDI
biological_process	GO:0001934	positive regulation of protein phosphorylation	1	11	0.0909091	0.261513	0.850704	1	1	Q54MY6_DICDI
biological_process	GO:0006312	mitotic recombination	1	6	0.166667	0.724596	0.584691	1	1	MSH3_DICDI
biological_process	GO:0051096	positive regulation of helicase activity	1	1	1	1	0.231273	1	1	MSH3_DICDI
biological_process	GO:0000735	removal of nonhomologous ends	1	1	1	1	0.231273	1	1	MSH3_DICDI
biological_process	GO:0007099	centriole replication	1	3	0.333333	0.864329	0.545801	1	1	Q54NE5_DICDI
biological_process	GO:1905786	positive regulation of anaphase-promoting complex-dependent catabolic process	1	2	0.5	0.946544	0.409091	1	1	CDH1_DICDI
biological_process	GO:2000641	regulation of early endosome to late endosome transport	1	2	0.5	0.946544	0.409091	1	1	Q54LZ3_DICDI
biological_process	GO:0043944	negative regulation of asexual sporulation resulting in formation of a cellular spore	1	1	1	1	0.231273	1	1	DIMA_DICDI
biological_process	GO:0050708	regulation of protein secretion	1	4	0.25	0.672278	0.731695	1	1	Q8T2G9_DICDI
biological_process	GO:0006398	mRNA 3'-end processing by stem-loop binding and cleavage	1	5	0.2	0.672278	0.731695	1	1	CPSF2_DICDI
biological_process	GO:0071277	cellular response to calcium ion	1	6	0.166667	0.794357	0.507369	1	1	CPND_DICDI
biological_process	GO:0044656	regulation of post-lysosomal vacuole size	1	3	0.333333	0.864329	0.545801	1	1	DYNA_DICDI
biological_process	GO:0034982	mitochondrial protein processing	1	4	0.25	0.818051	0.41763	1	1	Q75JS8_DICDI
biological_process	GO:0034551	mitochondrial respiratory chain complex III assembly	1	4	0.25	0.769499	0.650901	1	1	BCS1A_DICDI
biological_process	GO:0032979	protein insertion into mitochondrial inner membrane from matrix	1	5	0.2	0.672278	0.731695	1	1	BCS1A_DICDI
biological_process	GO:0010447	response to acidic pH	1	3	0.333333	0.672278	0.731695	1	1	CYAA_DICDI
biological_process	GO:0000916	actomyosin contractile ring contraction	1	3	0.333333	0.864329	0.545801	1	1	TALA_DICDI
biological_process	GO:0045184	establishment of protein localization	1	6	0.166667	0.902234	0.119023	1	1	ABIA_DICDI
biological_process	GO:0006807	nitrogen compound metabolic process	1	7	0.142857	1.30735e-06	0.999999	0	1	PYR1_DICDI
biological_process	GO:0051344	negative regulation of cyclic-nucleotide phosphodiesterase activity	1	2	0.5	0.946544	0.409091	1	1	DHKA_DICDI
biological_process	GO:0065003	protein-containing complex assembly	1	4	0.25	0.51954	0.530872	1	1	Q75JS8_DICDI
biological_process	GO:0043154	negative regulation of cysteine-type endopeptidase activity involved in apoptotic process	1	1	1	1	0.231273	1	1	LTOR5_DICDI
biological_process	GO:0008361	regulation of cell size	1	2	0.5	0.980487	0.0893754	1	1	LTOR5_DICDI
biological_process	GO:0098727	maintenance of cell number	1	1	1	1	0.231273	1	1	CTNA_DICDI
biological_process	GO:0040015	negative regulation of multicellular organism growth	1	1	1	1	0.231273	1	1	CTNA_DICDI
biological_process	GO:0106071	positive regulation of adenylate cyclase-activating G protein-coupled receptor signaling pathway	1	2	0.5	0.946544	0.409091	1	1	CTNA_DICDI
biological_process	GO:0032114	regulation of glucose-6-phosphatase activity	1	2	0.5	0.946544	0.409091	1	1	CTNA_DICDI
biological_process	GO:0006110	regulation of glycolytic process	1	1	1	1	0.231273	1	1	CTNA_DICDI
biological_process	GO:0006414	translational elongation	1	14	0.0714286	0.0336715	0.987868	1	1	Q55BS5_DICDI
biological_process	GO:0006177	GMP biosynthetic process	1	2	0.5	0.864329	0.545801	1	1	IMDH_DICDI
biological_process	GO:0006183	GTP biosynthetic process	1	3	0.333333	0.864329	0.545801	1	1	IMDH_DICDI
biological_process	GO:0006625	protein targeting to peroxisome	1	4	0.25	0.705971	0.549431	1	1	PEX14_DICDI
biological_process	GO:0034474	U2 snRNA 3'-end processing	1	1	1	1	0.231273	1	1	INT1_DICDI
biological_process	GO:0002031	G protein-coupled receptor internalization	1	2	0.5	0.946544	0.409091	1	1	ADCB_DICDI
biological_process	GO:0043405	regulation of MAP kinase activity	1	4	0.25	0.247599	0.913849	1	1	ADCB_DICDI
biological_process	GO:0007157	heterophilic cell-cell adhesion via plasma membrane cell adhesion molecules	1	3	0.333333	0.864329	0.545801	1	1	TGRB1_DICDI
biological_process	GO:0097696	receptor signaling pathway via STAT	1	3	0.333333	0.942021	0.181949	1	1	STATA_DICDI
biological_process	GO:0050764	regulation of phagocytosis	1	4	0.25	0.880414	0.215254	1	1	Q54JQ7_DICDI
biological_process	GO:0000463	maturation of LSU-rRNA from tricistronic rRNA transcript (SSU-rRNA, 5.8S rRNA, LSU-rRNA)	1	13	0.0769231	0.338152	0.869157	1	1	WDR12_DICDI
biological_process	GO:0071897	DNA biosynthetic process	1	4	0.25	0.645791	0.554814	1	1	DNLI1_DICDI
biological_process	GO:1903461	Okazaki fragment processing involved in mitotic DNA replication	1	1	1	1	0.231273	1	1	DNLI1_DICDI
biological_process	GO:0010738	regulation of protein kinase A signaling	1	3	0.333333	0.864329	0.545801	1	1	DHKL_DICDI
biological_process	GO:0001667	ameboidal-type cell migration	1	2	0.5	0.864329	0.545801	1	1	COROB_DICDI
biological_process	GO:0043928	exonucleolytic catabolism of deadenylated mRNA	1	7	0.142857	0.492631	0.841541	1	1	Q54PZ4_DICDI
biological_process	GO:0000467	exonucleolytic trimming to generate mature 3'-end of 5.8S rRNA from tricistronic rRNA transcript (SSU-rRNA, 5.8S rRNA, LSU-rRNA)	1	8	0.125	0.415309	0.878234	1	1	Q55AW0_DICDI
biological_process	GO:0071028	nuclear mRNA surveillance	1	6	0.166667	0.514419	0.761548	1	1	Q55BB0_DICDI
biological_process	GO:0071035	nuclear polyadenylation-dependent rRNA catabolic process	1	6	0.166667	0.578838	0.793802	1	1	Q55AW0_DICDI
biological_process	GO:0071038	nuclear polyadenylation-dependent tRNA catabolic process	1	6	0.166667	0.578838	0.793802	1	1	Q55AW0_DICDI
biological_process	GO:0034475	U4 snRNA 3'-end processing	1	8	0.125	0.415309	0.878234	1	1	Q55BB0_DICDI
biological_process	GO:0006284	base-excision repair	1	7	0.142857	0.338152	0.869157	1	1	Q86H44_DICDI
biological_process	GO:0110013	positive regulation of aggregation involved in sorocarp development	1	1	1	1	0.231273	1	1	GBF_DICDI
biological_process	GO:0031033	myosin filament organization	1	2	0.5	0.813736	0.31177	1	1	Q551V8_DICDI
biological_process	GO:0016045	detection of bacterium	1	2	0.5	0.946544	0.409091	1	1	VP13F_DICDI
biological_process	GO:1905301	regulation of macropinocytosis	1	6	0.166667	0.856911	0.303341	1	1	Q54B43_DICDI
biological_process	GO:0010810	regulation of cell-substrate adhesion	1	2	0.5	0.910625	0.275404	1	1	Q558Y3_DICDI
biological_process	GO:1905161	protein localization to phagocytic vesicle	1	1	1	0.864329	0.545801	1	1	FYV1_DICDI
biological_process	GO:0019432	triglyceride biosynthetic process	1	5	0.2	0.578838	0.793802	1	1	Q75JA1_DICDI
biological_process	GO:0097178	ruffle assembly	1	2	0.5	0.959159	0.230501	1	1	NAPA_DICDI
biological_process	GO:0042744	hydrogen peroxide catabolic process	1	5	0.2	0.672278	0.731695	1	1	CATB_DICDI
biological_process	GO:0045727	positive regulation of translation	1	4	0.25	0.160459	0.967399	1	1	Q54HN9_DICDI
biological_process	GO:0010390	histone monoubiquitination	1	1	1	1	0.231273	1	1	BRE1_DICDI
biological_process	GO:0035498	carnosine metabolic process	1	1	1	1	0.231273	1	1	CARME_DICDI
biological_process	GO:0016578	histone deubiquitination	1	2	0.5	0.946544	0.409091	1	1	Q54JM6_DICDI
biological_process	GO:0000710	meiotic mismatch repair	1	4	0.25	0.769499	0.650901	1	1	MSH6_DICDI
biological_process	GO:0006290	pyrimidine dimer repair	1	1	1	1	0.231273	1	1	MSH6_DICDI
biological_process	GO:0006120	mitochondrial electron transport, NADH to ubiquinone	1	10	0.1	0.288628	0.928109	1	1	ROCO4_DICDI
biological_process	GO:0019941	modification-dependent protein catabolic process	1	15	0.0666667	0.476005	0.585717	1	1	Q55DZ2_DICDI
biological_process	GO:0030162	regulation of proteolysis	1	8	0.125	0.261513	0.850704	1	1	Q54D90_DICDI
biological_process	GO:1903988	iron ion export across plasma membrane	1	2	0.5	0.946544	0.409091	1	1	NRAM1_DICDI
biological_process	GO:0016560	protein import into peroxisome matrix, docking	1	3	0.333333	0.864329	0.545801	1	1	PEX14_DICDI
biological_process	GO:0001510	RNA methylation	1	8	0.125	0.077097	0.966329	1	1	Q54TL4_DICDI
biological_process	GO:0045921	positive regulation of exocytosis	1	2	0.5	0.946544	0.409091	1	1	PAXB_DICDI
biological_process	GO:0007021	tubulin complex assembly	1	6	0.166667	0.578838	0.793802	1	1	Q54C01_DICDI
biological_process	GO:0007088	regulation of mitotic nuclear division	1	1	1	0.945165	0.143089	1	1	NUCMR_DICDI
biological_process	GO:0006301	postreplication repair	1	7	0.142857	0.530115	0.709838	1	1	Q54X37_DICDI
biological_process	GO:0097309	cap1 mRNA methylation	1	2	0.5	0.946544	0.409091	1	1	MTR1_DICDI
biological_process	GO:0080009	mRNA methylation	1	1	1	0.946544	0.409091	1	1	MTR1_DICDI
biological_process	GO:0043619	regulation of transcription from RNA polymerase II promoter in response to oxidative stress	1	3	0.333333	0.864329	0.545801	1	1	C7G014_DICDI
biological_process	GO:0051293	establishment of spindle localization	1	1	1	0.864329	0.545801	1	1	DYHC_DICDI
biological_process	GO:0007097	nuclear migration	1	1	1	0.946544	0.409091	1	1	DYHC_DICDI
biological_process	GO:0016575	histone deacetylation	1	9	0.111111	0.347377	0.906435	1	1	Q54UJ3_DICDI
biological_process	GO:0048468	cell development	1	1	1	0.959159	0.230501	1	1	HBX3_DICDI
biological_process	GO:0070534	protein K63-linked ubiquitination	1	4	0.25	0.769499	0.650901	1	1	PRP19_DICDI
biological_process	GO:0051292	nuclear pore complex assembly	1	1	1	1	0.231273	1	1	NUP98_DICDI
biological_process	GO:0051754	meiotic sister chromatid cohesion, centromeric	1	1	1	1	0.231273	1	1	BUB1_DICDI
biological_process	GO:0000390	spliceosomal complex disassembly	1	2	0.5	0.946544	0.409091	1	1	DHX8_DICDI
biological_process	GO:0090522	vesicle tethering involved in exocytosis	1	2	0.5	0.864329	0.545801	1	1	EXOC6_DICDI
biological_process	GO:0031284	positive regulation of guanylate cyclase activity	1	2	0.5	0.946544	0.409091	1	1	RIP3_DICDI
biological_process	GO:0009251	glucan catabolic process	1	4	0.25	0.645315	0.577927	1	1	Q54MD5_DICDI
biological_process	GO:0045930	negative regulation of mitotic cell cycle	1	1	1	0.968994	0.073073	1	1	BTG_DICDI
biological_process	GO:0000466	maturation of 5.8S rRNA from tricistronic rRNA transcript (SSU-rRNA, 5.8S rRNA, LSU-rRNA)	1	5	0.2	0.492949	0.713475	1	1	WDR12_DICDI
biological_process	GO:0061939	c-di-GMP signaling	1	4	0.25	0.769499	0.650901	1	1	CYAA_DICDI
biological_process	GO:0006469	negative regulation of protein kinase activity	1	4	0.25	0.890006	0.253262	1	1	CYAA_DICDI
biological_process	GO:0010042	response to manganese ion	1	1	1	1	0.231273	1	1	CYAA_DICDI
biological_process	GO:0006565	L-serine catabolic process	1	4	0.25	0.769499	0.650901	1	1	Q86AP7_DICDI
biological_process	GO:0071480	cellular response to gamma radiation	1	2	0.5	0.946544	0.409091	1	1	KU70_DICDI
biological_process	GO:0071481	cellular response to X-ray	1	2	0.5	0.946544	0.409091	1	1	KU70_DICDI
biological_process	GO:0010847	regulation of chromatin assembly	1	2	0.5	0.946544	0.409091	1	1	LMNB1_DICDI
biological_process	GO:0010507	negative regulation of autophagy	1	4	0.25	0.672278	0.731695	1	1	Q55GG3_DICDI
biological_process	GO:0016485	protein processing	1	7	0.142857	0.585324	0.56532	1	1	NICA_DICDI
biological_process	GO:0018279	protein N-linked glycosylation via asparagine	1	5	0.2	0.672278	0.731695	1	1	OST1_DICDI
biological_process	GO:0006121	mitochondrial electron transport, succinate to ubiquinone	1	4	0.25	0.769499	0.650901	1	1	C560_DICDI
biological_process	GO:0071539	protein localization to centrosome	1	3	0.333333	0.864329	0.545801	1	1	Q54NE5_DICDI
biological_process	GO:0006513	protein monoubiquitination	1	6	0.166667	0.794357	0.507369	1	1	Q54EF6_DICDI
biological_process	GO:0000725	recombinational repair	1	2	0.5	0.907227	0.150313	1	1	Q54SX9_DICDI
biological_process	GO:0032467	positive regulation of cytokinesis	1	3	0.333333	0.769499	0.650901	1	1	PAKA_DICDI
biological_process	GO:0051973	positive regulation of telomerase activity	1	2	0.5	0.946544	0.409091	1	1	Q86B10_DICDI
biological_process	GO:0010506	regulation of autophagy	1	6	0.166667	0.587881	0.661848	1	1	RPTOR_DICDI
biological_process	GO:0006401	RNA catabolic process	1	8	0.125	0.958492	0.0681256	1	1	Q86K90_DICDI
biological_process	GO:0001113	transcription open complex formation at RNA polymerase II promoter	1	1	1	1	0.231273	1	1	T2EA_DICDI
biological_process	GO:0036090	cleavage furrow ingression	1	3	0.333333	0.864329	0.545801	1	1	TALA_DICDI
biological_process	GO:0009117	nucleotide metabolic process	1	5	0.2	0.00181197	0.99915	0.368	1	NTPPB_DICDI
biological_process	GO:0050684	regulation of mRNA processing	1	2	0.5	0.794357	0.507369	1	1	Q55A48_DICDI
biological_process	GO:0006685	sphingomyelin catabolic process	1	4	0.25	0.769499	0.650901	1	1	SGMD_DICDI
biological_process	GO:0006885	regulation of pH	1	1	1	0.994727	0.0172226	1	1	RTOA_DICDI
biological_process	GO:0000448	cleavage in ITS2 between 5.8S rRNA and LSU-rRNA of tricistronic rRNA transcript (SSU-rRNA, 5.8S rRNA, LSU-rRNA)	1	1	1	1	0.231273	1	1	NOL9_DICDI
biological_process	GO:0042256	mature ribosome assembly	1	4	0.25	0.769499	0.650901	1	1	Q54WF2_DICDI
biological_process	GO:0006465	signal peptide processing	1	8	0.125	0.415309	0.878234	1	1	SPCS3_DICDI
biological_process	GO:0001514	selenocysteine incorporation	1	3	0.333333	0.864329	0.545801	1	1	Q55BS5_DICDI
biological_process	GO:0009263	deoxyribonucleotide biosynthetic process	1	3	0.333333	0.415309	0.878234	1	1	RIR1_DICDI
biological_process	GO:0042790	nucleolar large rRNA transcription by RNA polymerase I	1	2	0.5	0.946544	0.409091	1	1	Q554V6_DICDI
biological_process	GO:0032446	protein modification by small protein conjugation	1	8	0.125	0.102144	0.928267	1	1	UBA1_DICDI
biological_process	GO:0016925	protein sumoylation	1	9	0.111111	0.347377	0.906435	1	1	Q54HN3_DICDI
biological_process	GO:0030307	positive regulation of cell growth	1	1	1	1	0.231273	1	1	RPTOR_DICDI
biological_process	GO:0006567	threonine catabolic process	1	2	0.5	0.946544	0.409091	1	1	Q86AP7_DICDI
biological_process	GO:0071233	cellular response to leucine	1	1	1	1	0.231273	1	1	SESN_DICDI
biological_process	GO:1990253	cellular response to leucine starvation	1	1	1	1	0.231273	1	1	SESN_DICDI
biological_process	GO:0016239	positive regulation of macroautophagy	1	1	1	1	0.231273	1	1	SESN_DICDI
biological_process	GO:1901031	regulation of response to reactive oxygen species	1	1	1	1	0.231273	1	1	SESN_DICDI
biological_process	GO:0030643	cellular phosphate ion homeostasis	1	1	1	1	0.231273	1	1	SPXS3_DICDI
biological_process	GO:0006428	isoleucyl-tRNA aminoacylation	1	2	0.5	0.946544	0.409091	1	1	SYIM_DICDI
biological_process	GO:0140028	pore formation during contractile vacuole discharge	1	2	0.5	0.946544	0.409091	1	1	C7FZZ0_DICDI
biological_process	GO:0099138	altruistic, chimeric sorocarp development	1	4	0.25	0.769499	0.650901	1	1	TGRB1_DICDI
biological_process	GO:0009988	cell-cell recognition	1	2	0.5	0.946544	0.409091	1	1	TGRB1_DICDI
biological_process	GO:0097656	cell-cell self recognition	1	2	0.5	0.946544	0.409091	1	1	TGRB1_DICDI
biological_process	GO:0001682	tRNA 5'-leader removal	1	9	0.111111	0.347377	0.906435	1	1	Q54W23_DICDI
biological_process	GO:0070940	dephosphorylation of RNA polymerase II C-terminal domain	1	4	0.25	0.769499	0.650901	1	1	Q8ST13_DICDI
biological_process	GO:0002949	tRNA threonylcarbamoyladenosine modification	1	2	0.5	0.946544	0.409091	1	1	OSGEP_DICDI
biological_process	GO:0006620	posttranslational protein targeting to endoplasmic reticulum membrane	1	4	0.25	0.492631	0.841541	1	1	Q55C65_DICDI
biological_process	GO:0042274	ribosomal small subunit biogenesis	1	5	0.2	0.0937449	0.953343	1	1	Q54PG9_DICDI
biological_process	GO:0006431	methionyl-tRNA aminoacylation	1	2	0.5	0.946544	0.409091	1	1	SYMM_DICDI
biological_process	GO:0006509	membrane protein ectodomain proteolysis	1	1	1	1	0.231273	1	1	NICA_DICDI
biological_process	GO:0006116	NADH oxidation	1	4	0.25	0.769499	0.650901	1	1	Q54GF3_DICDI
biological_process	GO:0009813	flavonoid biosynthetic process	1	2	0.5	0.946544	0.409091	1	1	PKS1_DICDI
biological_process	GO:0030639	polyketide biosynthetic process	1	2	0.5	0.946544	0.409091	1	1	PKS1_DICDI
biological_process	GO:0006518	peptide metabolic process	1	3	0.333333	1.1158e-05	0.999994	0.003	1	C7G061_DICDI
biological_process	GO:0006422	aspartyl-tRNA aminoacylation	1	3	0.333333	0.864329	0.545801	1	1	SYDM_DICDI
biological_process	GO:0006144	purine nucleobase metabolic process	1	4	0.25	0.247599	0.913849	1	1	PURCE_DICDI
biological_process	GO:1990592	protein K69-linked ufmylation	1	3	0.333333	0.864329	0.545801	1	1	UFL1_DICDI
biological_process	GO:0016539	intein-mediated protein splicing	1	1	1	1	0.231273	1	1	RPC2_DICDI
biological_process	GO:0071712	ER-associated misfolded protein catabolic process	1	4	0.25	0.769499	0.650901	1	1	Q54ND8_DICDI
biological_process	GO:0034198	cellular response to amino acid starvation	1	8	0.125	0.653075	0.652623	1	1	Q54NW3_DICDI
biological_process	GO:0045022	early endosome to late endosome transport	1	2	0.5	0.959159	0.230501	1	1	WDR91_DICDI
biological_process	GO:0043551	regulation of phosphatidylinositol 3-kinase activity	1	1	1	0.946544	0.409091	1	1	WDR91_DICDI
biological_process	GO:0002191	cap-dependent translational initiation	1	1	1	1	0.231273	1	1	EIF3D_DICDI
biological_process	GO:0007023	post-chaperonin tubulin folding pathway	1	5	0.2	0.672278	0.731695	1	1	Q54C01_DICDI
biological_process	GO:0048211	Golgi vesicle docking	1	2	0.5	0.946544	0.409091	1	1	Q553R1_DICDI
biological_process	GO:0019505	resorcinol metabolic process	1	1	1	1	0.231273	1	1	PKS1_DICDI
biological_process	GO:0036051	protein localization to trailing edge	1	2	0.5	0.946544	0.409091	1	1	PTEN_DICDI
biological_process	GO:0036052	protein localization to uropod	1	1	1	1	0.231273	1	1	PTEN_DICDI
biological_process	GO:0006829	zinc ion transport	1	4	0.25	0.238452	0.944765	1	1	Y9332_DICDI
biological_process	GO:0030322	stabilization of membrane potential	1	2	0.5	0.946544	0.409091	1	1	Y9144_DICDI
biological_process	GO:0008156	negative regulation of DNA replication	1	1	1	0.971508	0.140844	1	1	PDS5_DICDI
biological_process	GO:0006975	DNA damage induced protein phosphorylation	1	1	1	1	0.231273	1	1	PRKDC_DICDI
biological_process	GO:0019722	calcium-mediated signaling	1	3	0.333333	0.450569	0.803971	1	1	PTP3_DICDI
biological_process	GO:1904893	negative regulation of receptor signaling pathway via STAT	1	1	1	1	0.231273	1	1	PTP3_DICDI
biological_process	GO:0042176	regulation of protein catabolic process	1	3	0.333333	0.455556	0.701669	1	1	PSMD3_DICDI
biological_process	GO:0000244	spliceosomal tri-snRNP complex assembly	1	4	0.25	0.769499	0.650901	1	1	PRP8_DICDI
biological_process	GO:0035590	purinergic nucleotide receptor signaling pathway	1	2	0.5	0.946544	0.409091	1	1	Q558Y3_DICDI
biological_process	GO:0061951	establishment of protein localization to plasma membrane	1	4	0.25	0.653075	0.652623	1	1	VACC_DICDI
biological_process	GO:0006910	phagocytosis, recognition	1	3	0.333333	0.864329	0.545801	1	1	VACC_DICDI
biological_process	GO:0006282	regulation of DNA repair	1	2	0.5	0.672278	0.731695	1	1	WRIP1_DICDI
biological_process	GO:0140285	endosome fission	1	1	1	1	0.231273	1	1	WASC5_DICDI
biological_process	GO:0043933	protein-containing complex organization	1	1	1	0.667699	0.376143	1	1	WASC5_DICDI
biological_process	GO:0051125	regulation of actin nucleation	1	1	1	0.859156	0.421162	1	1	WASC5_DICDI
biological_process	GO:0006419	alanyl-tRNA aminoacylation	1	2	0.5	0.946544	0.409091	1	1	SYAM_DICDI
biological_process	GO:0036265	RNA (guanine-N7)-methylation	1	2	0.5	0.672278	0.731695	1	1	Q55EX4_DICDI
biological_process	GO:0070373	negative regulation of ERK1 and ERK2 cascade	1	1	1	1	0.231273	1	1	Y7071_DICDI
biological_process	GO:1900424	regulation of defense response to bacterium	1	1	1	0.946544	0.409091	1	1	Y7071_DICDI
biological_process	GO:0048280	vesicle fusion with Golgi apparatus	1	3	0.333333	0.864329	0.545801	1	1	Q553R1_DICDI
biological_process	GO:0009115	xanthine catabolic process	1	1	1	1	0.231273	1	1	XDH_DICDI
biological_process	GO:0006673	inositol phosphoceramide metabolic process	1	1	1	1	0.231273	1	1	Y8928_DICDI
biological_process	GO:1990114	RNA polymerase II core complex assembly	1	1	1	1	0.231273	1	1	TF2B_DICDI
biological_process	GO:0001174	transcriptional start site selection at RNA polymerase II promoter	1	1	1	1	0.231273	1	1	TF2B_DICDI
biological_process	GO:0043410	positive regulation of MAPK cascade	1	1	1	0.288628	0.928109	1	1	Y1625_DICDI
biological_process	GO:0000012	single strand break repair	1	6	0.166667	0.492631	0.841541	1	1	Q86H44_DICDI
biological_process	GO:0009234	menaquinone biosynthetic process	1	5	0.2	0.672278	0.731695	1	1	Q54CJ6_DICDI
biological_process	GO:0032194	ubiquinone biosynthetic process via 3,4-dihydroxy-5-polyprenylbenzoate	1	5	0.2	0.672278	0.731695	1	1	Q54CJ6_DICDI
biological_process	GO:0042371	vitamin K biosynthetic process	1	5	0.2	0.672278	0.731695	1	1	Q54CJ6_DICDI
biological_process	GO:0010165	response to X-ray	1	2	0.5	0.959159	0.230501	1	1	Q86HD8_DICDI
biological_process	GO:0071260	cellular response to mechanical stimulus	1	1	1	1	0.231273	1	1	Y2801_DICDI
biological_process	GO:0042391	regulation of membrane potential	1	1	1	0.996674	0.0157861	1	1	Y2801_DICDI
biological_process	GO:1903664	regulation of asexual reproduction	1	3	0.333333	0.865817	0.242417	1	1	Q558Y3_DICDI
biological_process	GO:0034314	Arp2/3 complex-mediated actin nucleation	1	8	0.125	0.450569	0.803971	1	1	WASH1_DICDI
biological_process	GO:2001137	positive regulation of endocytic recycling	1	1	1	1	0.231273	1	1	WASH1_DICDI
biological_process	GO:0009063	cellular amino acid catabolic process	1	4	0.25	0.00187356	0.999453	0.388	1	Y9130_DICDI
biological_process	GO:0035437	maintenance of protein localization in endoplasmic reticulum	1	1	1	0.864329	0.545801	1	1	TAPT1_DICDI
biological_process	GO:0007096	regulation of exit from mitosis	1	3	0.333333	0.769499	0.650901	1	1	Q54Y40_DICDI
biological_process	GO:0035965	cardiolipin acyl-chain remodeling	1	1	1	1	0.231273	1	1	TAZ_DICDI
biological_process	GO:0007007	inner mitochondrial membrane organization	1	1	1	0.859156	0.421162	1	1	TAZ_DICDI
biological_process	GO:0034755	iron ion transmembrane transport	1	1	1	0.864329	0.545801	1	1	NRAM1_DICDI
biological_process	GO:0006828	manganese ion transport	1	1	1	1	0.231273	1	1	NRAM1_DICDI
biological_process	GO:2000146	negative regulation of cell motility	1	2	0.5	0.769499	0.650901	1	1	DRKD_DICDI
biological_process	GO:0051271	negative regulation of cellular component movement	1	2	0.5	0.915332	0.327722	1	1	GEFB_DICDI
biological_process	GO:0045807	positive regulation of endocytosis	1	2	0.5	0.96184	0.121222	1	1	GEFB_DICDI
biological_process	GO:0047496	vesicle transport along microtubule	1	3	0.333333	0.988377	0.084668	1	1	KIF1_DICDI
biological_process	GO:0032438	melanosome organization	1	4	0.25	0.769499	0.650901	1	1	RB32C_DICDI
biological_process	GO:0070192	chromosome organization involved in meiotic cell cycle	1	2	0.5	0.964356	0.132361	1	1	RAD50_DICDI
biological_process	GO:0090305	nucleic acid phosphodiester bond hydrolysis	1	2	0.5	0.85227	0.228296	1	1	RAD50_DICDI
biological_process	GO:0000019	regulation of mitotic recombination	1	1	1	0.946544	0.409091	1	1	RAD50_DICDI
biological_process	GO:0000722	telomere maintenance via recombination	1	1	1	1	0.231273	1	1	RAD50_DICDI
biological_process	GO:0007004	telomere maintenance via telomerase	1	3	0.333333	0.672278	0.731695	1	1	RAD50_DICDI
biological_process	GO:0071285	cellular response to lithium ion	1	2	0.5	0.946544	0.409091	1	1	Q54ET8_DICDI
biological_process	GO:1904359	regulation of spore germination	1	1	1	0.946544	0.409091	1	1	DHKB_DICDI
biological_process	GO:0009062	fatty acid catabolic process	1	2	0.5	0.0915867	0.965142	1	1	Q75JA1_DICDI
biological_process	GO:0043066	negative regulation of apoptotic process	1	1	1	0.987652	0.135671	1	1	API5_DICDI
biological_process	GO:0070536	protein K63-linked deubiquitination	1	1	1	1	0.231273	1	1	D1039_DICDI
biological_process	GO:0006336	DNA replication-independent chromatin assembly	1	4	0.25	0.492631	0.841541	1	1	Q55GC1_DICDI
biological_process	GO:0017196	N-terminal peptidyl-methionine acetylation	1	5	0.2	0.672278	0.731695	1	1	Q54C34_DICDI
biological_process	GO:0033275	actin-myosin filament sliding	1	3	0.333333	0.864329	0.545801	1	1	MYOJ_DICDI
biological_process	GO:0030048	actin filament-based movement	1	1	1	0.942663	0.16115	1	1	MYOI_DICDI
biological_process	GO:0140027	contractile vacuole localization	1	1	1	1	0.231273	1	1	MYOJ_DICDI
biological_process	GO:0009691	cytokinin biosynthetic process	1	2	0.5	0.946544	0.409091	1	1	IPT_DICDI
biological_process	GO:0051661	maintenance of centrosome location	1	2	0.5	0.946544	0.409091	1	1	KIF9_DICDI
biological_process	GO:0007019	microtubule depolymerization	1	1	1	0.946544	0.409091	1	1	KIF9_DICDI
biological_process	GO:0072386	plus-end-directed organelle transport along microtubule	1	1	1	1	0.231273	1	1	KIF1_DICDI
biological_process	GO:0072383	plus-end-directed vesicle transport along microtubule	1	1	1	1	0.231273	1	1	KIF1_DICDI
biological_process	GO:0036444	calcium import into the mitochondrion	1	2	0.5	0.946544	0.409091	1	1	Q54JS1_DICDI
biological_process	GO:0051560	mitochondrial calcium ion homeostasis	1	2	0.5	0.946544	0.409091	1	1	Q54JS1_DICDI
biological_process	GO:0009313	oligosaccharide catabolic process	1	1	1	0.946544	0.409091	1	1	MANG_DICDI
biological_process	GO:0010824	regulation of centrosome duplication	1	2	0.5	0.946544	0.409091	1	1	Q54G01_DICDI
biological_process	GO:0042766	nucleosome mobilization	1	2	0.5	0.946544	0.409091	1	1	Q54DG0_DICDI
biological_process	GO:1900756	protein processing in phagocytic vesicle	1	2	0.5	0.946544	0.409091	1	1	DYNA_DICDI
biological_process	GO:0007234	osmosensory signaling via phosphorelay pathway	1	1	1	1	0.231273	1	1	DOKA_DICDI
biological_process	GO:0036289	peptidyl-serine autophosphorylation	1	1	1	1	0.231273	1	1	DRKD_DICDI
biological_process	GO:0008610	lipid biosynthetic process	1	6	0.166667	0.0753645	0.945581	1	1	Q54SY8_DICDI
biological_process	GO:0043968	histone H2A acetylation	1	3	0.333333	0.864329	0.545801	1	1	Q54IH7_DICDI
biological_process	GO:0009082	branched-chain amino acid biosynthetic process	1	2	0.5	0.769499	0.650901	1	1	Q86AP7_DICDI
biological_process	GO:0015937	coenzyme A biosynthetic process	1	8	0.125	0.415309	0.878234	1	1	Q54HC8_DICDI
biological_process	GO:0008053	mitochondrial fusion	1	1	1	1	0.0534558	1	1	CLU_DICDI
biological_process	GO:0035023	regulation of Rho protein signal transduction	1	4	0.25	0.769499	0.650901	1	1	Q54DW4_DICDI
biological_process	GO:0050850	positive regulation of calcium-mediated signaling	1	1	1	1	0.231273	1	1	GEFM_DICDI
biological_process	GO:0030032	lamellipodium assembly	1	2	0.5	0.946544	0.409091	1	1	Q54WT5_DICDI
biological_process	GO:0046900	tetrahydrofolylpolyglutamate metabolic process	1	2	0.5	0.864329	0.545801	1	1	GGHA_DICDI
biological_process	GO:0006449	regulation of translational termination	1	1	1	0.864329	0.545801	1	1	GLE1_DICDI
biological_process	GO:0042853	L-alanine catabolic process	1	1	1	1	0.231273	1	1	ALAM_DICDI
biological_process	GO:0006085	acetyl-CoA biosynthetic process	1	3	0.333333	0.945556	0.205643	1	1	ACSA_DICDI
biological_process	GO:0019427	acetyl-CoA biosynthetic process from acetate	1	1	1	1	0.231273	1	1	ACSA_DICDI
biological_process	GO:0002084	protein depalmitoylation	1	3	0.333333	0.864329	0.545801	1	1	APT11_DICDI
biological_process	GO:0051299	centrosome separation	1	1	1	0.946544	0.409091	1	1	DYIN_DICDI
biological_process	GO:0010970	transport along microtubule	1	1	1	0.971508	0.140844	1	1	DYIN_DICDI
biological_process	GO:0015810	aspartate transmembrane transport	1	1	1	1	0.231273	1	1	CMC_DICDI
biological_process	GO:0015813	L-glutamate transmembrane transport	1	1	1	1	0.231273	1	1	CMC_DICDI
biological_process	GO:0043490	malate-aspartate shuttle	1	1	1	1	0.231273	1	1	CMC_DICDI
biological_process	GO:0045597	positive regulation of cell differentiation	1	1	1	0.993392	0.0356436	1	1	CMF_DICDI
biological_process	GO:1903831	signal transduction involved in cellular response to ammonium ion	1	1	1	1	0.231273	1	1	DHKC_DICDI
biological_process	GO:0051457	maintenance of protein location in nucleus	1	1	1	1	0.231273	1	1	Q557I6_DICDI
biological_process	GO:0009089	lysine biosynthetic process via diaminopimelate	1	6	0.166667	0.578838	0.793802	1	1	Q75JL7_DICDI
biological_process	GO:0001897	cytolysis by symbiont of host cells	1	7	0.142857	0.492631	0.841541	1	1	Q54WP0_DICDI
biological_process	GO:0031053	primary miRNA processing	1	5	0.2	0.672278	0.731695	1	1	Q95ZG5_DICDI
biological_process	GO:0031087	deadenylation-independent decapping of nuclear-transcribed mRNA	1	2	0.5	0.946544	0.409091	1	1	Q54J96_DICDI
biological_process	GO:0034440	lipid oxidation	1	2	0.5	0.106636	0.958266	1	1	Q86H96_DICDI
biological_process	GO:0033260	nuclear DNA replication	1	2	0.5	0.391666	0.839541	1	1	Q54MP7_DICDI
biological_process	GO:0006892	post-Golgi vesicle-mediated transport	1	2	0.5	0.994521	0.0167229	1	1	Q54GL5_DICDI
biological_process	GO:0071788	endoplasmic reticulum tubular network maintenance	1	1	1	1	0.231273	1	1	Q54GT5_DICDI
biological_process	GO:1903373	positive regulation of endoplasmic reticulum tubular network organization	1	1	1	1	0.231273	1	1	Q54GT5_DICDI
biological_process	GO:0045926	negative regulation of growth	1	1	1	0.959159	0.230501	1	1	Q1ZXJ2_DICDI
biological_process	GO:0006283	transcription-coupled nucleotide-excision repair	1	5	0.2	0.672278	0.731695	1	1	Q54TY2_DICDI
biological_process	GO:0055075	potassium ion homeostasis	1	5	0.2	0.415309	0.878234	1	1	Q54E67_DICDI
biological_process	GO:0090071	negative regulation of ribosome biogenesis	1	1	1	1	0.231273	1	1	Q54B26_DICDI
biological_process	GO:0032784	regulation of DNA-templated transcription, elongation	1	2	0.5	0.995124	0.0173811	1	1	Q552T7_DICDI
biological_process	GO:0043007	maintenance of rDNA	1	3	0.333333	0.864329	0.545801	1	1	Q54Y40_DICDI
biological_process	GO:0006875	cellular metal ion homeostasis	1	2	0.5	0.189209	0.898749	1	1	Q86L24_DICDI
biological_process	GO:0006813	potassium ion transport	1	4	0.25	0.705971	0.549431	1	1	Q55CU6_DICDI
biological_process	GO:0072318	clathrin coat disassembly	1	1	1	1	0.231273	1	1	Q8T867_DICDI
biological_process	GO:0043937	regulation of sporulation	1	2	0.5	0.794357	0.507369	1	1	Q54WI0_DICDI
biological_process	GO:0032786	positive regulation of DNA-templated transcription, elongation	1	4	0.25	0.763573	0.485581	1	1	Q1ZXD7_DICDI
biological_process	GO:0034058	endosomal vesicle fusion	1	4	0.25	0.859156	0.421162	1	1	Q54EK0_DICDI
biological_process	GO:0045732	positive regulation of protein catabolic process	1	2	0.5	0.381261	0.782875	1	1	C7G034_DICDI
biological_process	GO:0071044	histone mRNA catabolic process	1	1	1	1	0.231273	1	1	Q55AW0_DICDI
biological_process	GO:0071040	nuclear polyadenylation-dependent antisense transcript catabolic process	1	1	1	1	0.231273	1	1	Q55AW0_DICDI
biological_process	GO:0071039	nuclear polyadenylation-dependent CUT catabolic process	1	1	1	1	0.231273	1	1	Q55AW0_DICDI
biological_process	GO:0071036	nuclear polyadenylation-dependent snoRNA catabolic process	1	1	1	1	0.231273	1	1	Q55AW0_DICDI
biological_process	GO:0071037	nuclear polyadenylation-dependent snRNA catabolic process	1	1	1	1	0.231273	1	1	Q55AW0_DICDI
biological_process	GO:0070919	production of siRNA involved in gene silencing by small RNA	1	3	0.333333	0.864329	0.545801	1	1	Q54UI6_DICDI
biological_process	GO:0031297	replication fork processing	1	5	0.2	0.794357	0.507369	1	1	Q54TE8_DICDI
biological_process	GO:0043618	regulation of transcription from RNA polymerase II promoter in response to stress	1	1	1	0.915332	0.327722	1	1	Q54DG0_DICDI
biological_process	GO:1902004	positive regulation of amyloid-beta formation	1	1	1	1	0.231273	1	1	Q54MT3_DICDI
biological_process	GO:0000493	box H/ACA snoRNP assembly	1	2	0.5	0.946544	0.409091	1	1	Q75JJ6_DICDI
biological_process	GO:0019677	NAD catabolic process	1	1	1	1	0.231273	1	1	Q54N32_DICDI
biological_process	GO:0006742	NADP catabolic process	1	1	1	1	0.231273	1	1	Q54N32_DICDI
biological_process	GO:0006271	DNA strand elongation involved in DNA replication	1	5	0.2	0.930971	0.158803	1	1	Q54RU0_DICDI
biological_process	GO:0061780	mitotic cohesin loading	1	3	0.333333	0.864329	0.545801	1	1	Q86J15_DICDI
biological_process	GO:0051569	regulation of histone H3-K4 methylation	1	1	1	1	0.231273	1	1	Q54Y92_DICDI
biological_process	GO:0006643	membrane lipid metabolic process	1	3	0.333333	0.00282493	0.998971	0.513	1	Q54SY8_DICDI
biological_process	GO:0006820	anion transport	1	1	1	0.240101	0.87143	1	1	Q54ZV3_DICDI
biological_process	GO:0042407	cristae formation	1	1	1	1	0.231273	1	1	Q55BP9_DICDI
biological_process	GO:0051256	mitotic spindle midzone assembly	1	2	0.5	0.946544	0.409091	1	1	Q54VM5_DICDI
biological_process	GO:1990918	double-strand break repair involved in meiotic recombination	1	2	0.5	0.946544	0.409091	1	1	Q54LI7_DICDI
biological_process	GO:0035493	SNARE complex assembly	1	2	0.5	0.946544	0.409091	1	1	Q54JC5_DICDI
biological_process	GO:1900024	regulation of substrate adhesion-dependent cell spreading	1	1	1	1	0.231273	1	1	Q54JQ7_DICDI
biological_process	GO:0071988	protein localization to spindle pole body	1	1	1	1	0.231273	1	1	Q54G01_DICDI
biological_process	GO:0042138	meiotic DNA double-strand break formation	1	1	1	1	0.231273	1	1	Q54BN2_DICDI
biological_process	GO:0097552	mitochondrial double-strand break repair via homologous recombination	1	1	1	1	0.231273	1	1	Q54BN2_DICDI
biological_process	GO:0034499	late endosome to Golgi transport	1	1	1	1	0.231273	1	1	Q54UN7_DICDI
biological_process	GO:0031532	actin cytoskeleton reorganization	1	4	0.25	0.945556	0.205643	1	1	Q551W8_DICDI
biological_process	GO:0042791	5S class rRNA transcription by RNA polymerase III	1	1	1	1	0.231273	1	1	Q54FU1_DICDI
biological_process	GO:0017156	calcium-ion regulated exocytosis	1	1	1	1	0.231273	1	1	Q558Y3_DICDI
biological_process	GO:0048208	COPII vesicle coating	1	1	1	0.769499	0.650901	1	1	Q55BR0_DICDI
biological_process	GO:0006264	mitochondrial DNA replication	1	3	0.333333	0.864329	0.545801	1	1	Q54J94_DICDI
biological_process	GO:0006471	protein ADP-ribosylation	1	2	0.5	0.990971	0.0544442	1	1	Q54JP6_DICDI
biological_process	GO:0035330	regulation of hippo signaling	1	1	1	1	0.231273	1	1	Q54RX7_DICDI
biological_process	GO:0045003	double-strand break repair via synthesis-dependent strand annealing	1	1	1	0.769499	0.650901	1	1	Q8T145_DICDI
biological_process	GO:0071932	replication fork reversal	1	1	1	1	0.231273	1	1	Q8T145_DICDI
biological_process	GO:0030178	negative regulation of Wnt signaling pathway	1	3	0.333333	0.492631	0.841541	1	1	Q555U9_DICDI
biological_process	GO:0032483	regulation of Rab protein signal transduction	1	1	1	1	0.231273	1	1	Q54DW4_DICDI
biological_process	GO:0060628	regulation of ER to Golgi vesicle-mediated transport	1	1	1	0.769499	0.650901	1	1	Q55CJ0_DICDI
biological_process	GO:0045740	positive regulation of DNA replication	1	1	1	1	0.231273	1	1	Q54WQ3_DICDI
biological_process	GO:0010833	telomere maintenance via telomere lengthening	1	1	1	0.859156	0.421162	1	1	Q54WQ3_DICDI
biological_process	GO:0010324	membrane invagination	1	1	1	0.211424	0.884431	1	1	C7FZZ0_DICDI
biological_process	GO:0030423	targeting of mRNA for destruction involved in RNA interference	1	1	1	1	0.231273	1	1	Q7KWS3_DICDI
biological_process	GO:0098887	neurotransmitter receptor transport, endosome to postsynaptic membrane	1	1	1	1	0.231273	1	1	Q54Y97_DICDI
biological_process	GO:1905244	regulation of modification of synaptic structure	1	1	1	1	0.231273	1	1	Q54Y97_DICDI
biological_process	GO:0099152	regulation of neurotransmitter receptor transport, endosome to postsynaptic membrane	1	1	1	1	0.231273	1	1	Q54Y97_DICDI
biological_process	GO:0099158	regulation of recycling endosome localization within postsynapse	1	1	1	1	0.231273	1	1	Q54Y97_DICDI
biological_process	GO:0007160	cell-matrix adhesion	1	1	1	1	0.231273	1	1	Q86IW0_DICDI
biological_process	GO:0042789	mRNA transcription by RNA polymerase II	1	1	1	1	0.231273	1	1	Q55A48_DICDI
biological_process	GO:0034728	nucleosome organization	1	1	1	0.493143	0.669299	1	1	Q55A48_DICDI
biological_process	GO:0010586	miRNA metabolic process	1	3	0.333333	0.864329	0.545801	1	1	Q54UI6_DICDI
biological_process	GO:0006361	transcription initiation from RNA polymerase I promoter	1	1	1	0.946544	0.409091	1	1	Q54HB0_DICDI
biological_process	GO:0051666	actin cortical patch localization	1	1	1	1	0.231273	1	1	Q55D43_DICDI
biological_process	GO:0097250	mitochondrial respirasome assembly	1	1	1	1	0.231273	1	1	Q54XU9_DICDI
biological_process	GO:0090222	centrosome-templated microtubule nucleation	1	1	1	1	0.231273	1	1	Q54NE5_DICDI
biological_process	GO:0045945	positive regulation of transcription by RNA polymerase III	1	1	1	1	0.231273	1	1	Q54MW3_DICDI
biological_process	GO:0043647	inositol phosphate metabolic process	1	1	1	0.819886	0.354685	1	1	Q54XR3_DICDI
biological_process	GO:0030953	astral microtubule organization	1	1	1	1	0.231273	1	1	Q553N8_DICDI
biological_process	GO:0035372	protein localization to microtubule	1	1	1	0.946544	0.409091	1	1	Q553N8_DICDI
biological_process	GO:0072712	response to thiabendazole	1	1	1	1	0.231273	1	1	Q553N8_DICDI
biological_process	GO:0070898	RNA polymerase III preinitiation complex assembly	1	1	1	1	0.231273	1	1	Q54R53_DICDI
biological_process	GO:1990515	3' transitive RNA interference	1	1	1	1	0.231273	1	1	Q54UI6_DICDI
biological_process	GO:1990514	5' transitive RNA interference	1	1	1	1	0.231273	1	1	Q54UI6_DICDI
biological_process	GO:0010587	miRNA catabolic process	1	1	1	1	0.231273	1	1	Q54UI6_DICDI
biological_process	GO:0015976	carbon utilization	1	2	0.5	0.946544	0.409091	1	1	Q55BU2_DICDI
biological_process	GO:0010269	response to selenium ion	1	1	1	1	0.231273	1	1	Q55CQ4_DICDI
biological_process	GO:0070478	nuclear-transcribed mRNA catabolic process, 3'-5' exonucleolytic nonsense-mediated decay	1	1	1	1	0.231273	1	1	Q86K90_DICDI
biological_process	GO:0048026	positive regulation of mRNA splicing, via spliceosome	1	1	1	1	0.231273	1	1	Q54E37_DICDI
biological_process	GO:0036071	N-glycan fucosylation	1	2	0.5	0.946544	0.409091	1	1	Q54Y16_DICDI
biological_process	GO:0035194	post-transcriptional gene silencing by RNA	1	3	0.333333	0.974271	0.07521	1	1	Q86IV6_DICDI
biological_process	GO:0043111	replication fork arrest	1	2	0.5	0.946544	0.409091	1	1	Q54KW8_DICDI
biological_process	GO:0051383	kinetochore organization	1	1	1	0.946544	0.409091	1	1	Q54WM1_DICDI
biological_process	GO:0045132	meiotic chromosome segregation	1	2	0.5	0.841197	0.308243	1	1	Q54WM1_DICDI
biological_process	GO:0051306	mitotic sister chromatid separation	1	1	1	0.872617	0.263411	1	1	Q54DZ9_DICDI
biological_process	GO:0071108	protein K48-linked deubiquitination	1	2	0.5	0.946544	0.409091	1	1	Q54TY0_DICDI
biological_process	GO:0051865	protein autoubiquitination	1	1	1	1	0.231273	1	1	Q54EF6_DICDI
biological_process	GO:0071630	nuclear protein quality control by the ubiquitin-proteasome system	1	1	1	1	0.231273	1	1	Q54Z94_DICDI
biological_process	GO:0031144	proteasome localization	1	1	1	1	0.231273	1	1	Q54Z94_DICDI
biological_process	GO:0030655	beta-lactam antibiotic catabolic process	1	1	1	1	0.231273	1	1	Q55G30_DICDI
biological_process	GO:0046677	response to antibiotic	1	1	1	1	0.231273	1	1	Q55G30_DICDI
biological_process	GO:0045056	transcytosis	1	1	1	1	0.231273	1	1	Q553R1_DICDI
biological_process	GO:0045016	mitochondrial magnesium ion transmembrane transport	1	1	1	1	0.231273	1	1	Q553K8_DICDI
biological_process	GO:0043213	bacteriocin transport	1	1	1	1	0.231273	1	1	Q54H52_DICDI
biological_process	GO:0018205	peptidyl-lysine modification	1	1	1	0.0967368	0.944229	1	1	Q54QM3_DICDI
biological_process	GO:2000300	regulation of synaptic vesicle exocytosis	1	1	1	1	0.231273	1	1	Q54RP3_DICDI
biological_process	GO:0048205	COPI coating of Golgi vesicle	1	1	1	1	0.231273	1	1	Q54DK9_DICDI
biological_process	GO:0033567	DNA replication, Okazaki fragment processing	1	1	1	1	0.0534558	1	1	Q86IV6_DICDI
biological_process	GO:0000964	mitochondrial RNA 5'-end processing	1	1	1	0.769499	0.650901	1	1	Q54T03_DICDI
biological_process	GO:0051762	sesquiterpene biosynthetic process	1	7	0.142857	0.492631	0.841541	1	1	Q7KWU0_DICDI
biological_process	GO:1905267	endonucleolytic cleavage involved in tRNA processing	1	1	1	0.988377	0.084668	1	1	Q54W23_DICDI
biological_process	GO:0006520	cellular amino acid metabolic process	0	6	0	2.37525e-06	0.999999	0	1
biological_process	GO:0098630	aggregation of unicellular organisms	0	1	0	0.768727	1	1	1
biological_process	GO:0070262	peptidyl-serine dephosphorylation	0	2	0	0.590909	1	1	1
biological_process	GO:0009094	L-phenylalanine biosynthetic process	0	1	0	0.768727	1	1	1
biological_process	GO:0006559	L-phenylalanine catabolic process	0	7	0	0.158459	1	1	1
biological_process	GO:0006571	tyrosine biosynthetic process	0	1	0	0.768727	1	1	1
biological_process	GO:0009443	pyridoxal 5'-phosphate salvage	0	1	0	0.768727	1	1	1
biological_process	GO:0042816	vitamin B6 metabolic process	0	1	0	0.769499	0.650901	1	1
biological_process	GO:0006656	phosphatidylcholine biosynthetic process	0	6	0	0.206198	1	1	1
biological_process	GO:0007042	lysosomal lumen acidification	0	1	0	0.768727	1	1	1
biological_process	GO:0070863	positive regulation of protein exit from endoplasmic reticulum	0	3	0	0.454199	1	1	1
biological_process	GO:2000010	positive regulation of protein localization to cell surface	0	1	0	0.768727	1	1	1
biological_process	GO:0140460	response to Gram-negative bacterium	0	5	0	0.268305	1	1	1
biological_process	GO:0031670	cellular response to nutrient	0	2	0	0.590909	1	1	1
biological_process	GO:1904894	positive regulation of receptor signaling pathway via STAT	0	3	0	0.454199	1	1	1
biological_process	GO:0007260	tyrosine phosphorylation of STAT protein	0	3	0	0.454199	1	1	1
biological_process	GO:0006094	gluconeogenesis	0	10	0	0.0718915	1	1	1
biological_process	GO:0042823	pyridoxal phosphate biosynthetic process	0	2	0	0.454199	1	1	1
biological_process	GO:0008614	pyridoxine metabolic process	0	2	0	0.864329	0.545801	1	1
biological_process	GO:1900115	extracellular regulation of signal transduction	0	1	0	0.768727	1	1	1
biological_process	GO:1902660	negative regulation of glucose mediated signaling pathway	0	2	0	0.590909	1	1	1
biological_process	GO:0072720	response to dithiothreitol	0	1	0	0.768727	1	1	1
biological_process	GO:0046058	cAMP metabolic process	0	2	0	0.910625	0.275404	1	1
biological_process	GO:0051281	positive regulation of release of sequestered calcium ion into cytosol	0	1	0	0.768727	1	1	1
biological_process	GO:1904776	regulation of protein localization to cell cortex	0	2	0	0.454199	1	1	1
biological_process	GO:0051279	regulation of release of sequestered calcium ion into cytosol	0	2	0	0.590909	1	1	1
biological_process	GO:0019985	translesion synthesis	0	4	0	0.724596	0.584691	1	1
biological_process	GO:0022904	respiratory electron transport chain	0	5	0	0.029048	0.992034	0.999	1
biological_process	GO:0047484	regulation of response to osmotic stress	0	2	0	0.590909	1	1	1
biological_process	GO:0034625	fatty acid elongation, monounsaturated fatty acid	0	7	0	0.158459	1	1	1
biological_process	GO:0034626	fatty acid elongation, polyunsaturated fatty acid	0	7	0	0.158459	1	1	1
biological_process	GO:0019367	fatty acid elongation, saturated fatty acid	0	7	0	0.158459	1	1	1
biological_process	GO:0042761	very long-chain fatty acid biosynthetic process	0	10	0	0.0718915	1	1	1
biological_process	GO:0031117	positive regulation of microtubule depolymerization	0	1	0	0.768727	1	1	1
biological_process	GO:0034214	protein hexamerization	0	1	0	0.768727	1	1	1
biological_process	GO:0045900	negative regulation of translational elongation	0	2	0	0.590909	1	1	1
biological_process	GO:0006423	cysteinyl-tRNA aminoacylation	0	2	0	0.590909	1	1	1
biological_process	GO:0046034	ATP metabolic process	0	4	0	0.0101093	0.996098	0.932	1
biological_process	GO:0036176	response to neutral pH	0	1	0	0.768727	1	1	1
biological_process	GO:0007034	vacuolar transport	0	4	0	0.977946	0.0427007	1	1
biological_process	GO:0032447	protein urmylation	0	3	0	0.454199	1	1	1
biological_process	GO:0034227	tRNA thio-modification	0	2	0	0.268305	1	1	1
biological_process	GO:0009116	nucleoside metabolic process	0	10	0	0.0098266	0.998182	0.931	1
biological_process	GO:0044206	UMP salvage	0	5	0	0.268305	1	1	1
biological_process	GO:0016126	sterol biosynthetic process	0	18	0	0.00105324	1	0.249	1
biological_process	GO:0016226	iron-sulfur cluster assembly	0	18	0	0.00514082	1	0.734	1
biological_process	GO:0032981	mitochondrial respiratory chain complex I assembly	0	12	0	0.042436	1	1	1
biological_process	GO:0031468	nuclear membrane reassembly	0	1	0	0.768727	1	1	1
biological_process	GO:0097720	calcineurin-mediated signaling	0	3	0	0.454199	1	1	1
biological_process	GO:0015918	sterol transport	0	10	0	0.042436	1	1	1
biological_process	GO:0090387	phagolysosome assembly involved in apoptotic cell clearance	0	2	0	0.590909	1	1	1
biological_process	GO:1905364	regulation of endosomal vesicle fusion	0	1	0	0.946544	0.409091	1	1
biological_process	GO:0048548	regulation of pinocytosis	0	1	0	0.841197	0.308243	1	1
biological_process	GO:0031289	actin phosphorylation	0	2	0	0.590909	1	1	1
biological_process	GO:0031032	actomyosin structure organization	0	4	0	0.867639	0.346925	1	1
biological_process	GO:0030336	negative regulation of cell migration	0	2	0	0.590909	1	1	1
biological_process	GO:0010811	positive regulation of cell-substrate adhesion	0	2	0	0.590909	1	1	1
biological_process	GO:0032486	Rap protein signal transduction	0	1	0	0.768727	1	1	1
biological_process	GO:0046578	regulation of Ras protein signal transduction	0	7	0	0.83426	0.277983	1	1
biological_process	GO:0009409	response to cold	0	1	0	0.768727	1	1	1
biological_process	GO:0034389	lipid droplet organization	0	3	0	0.349099	1	1	1
biological_process	GO:0032482	Rab protein signal transduction	0	4	0	0.672278	0.731695	1	1
biological_process	GO:0030335	positive regulation of cell migration	0	2	0	0.590909	1	1	1
biological_process	GO:0008219	cell death	0	2	0	0.956778	0.0891574	1	1
biological_process	GO:0060627	regulation of vesicle-mediated transport	0	3	0	0.953756	0.0782302	1	1
biological_process	GO:0009306	protein secretion	0	16	0	0.0493791	0.988252	1	1
biological_process	GO:0032466	negative regulation of cytokinesis	0	1	0	0.768727	1	1	1
biological_process	GO:0045806	negative regulation of endocytosis	0	1	0	0.672278	0.731695	1	1
biological_process	GO:1905169	regulation of protein localization to phagocytic vesicle	0	2	0	0.590909	1	1	1
biological_process	GO:0071321	cellular response to cGMP	0	2	0	0.590909	1	1	1
biological_process	GO:0010753	positive regulation of cGMP-mediated signaling	0	2	0	0.590909	1	1	1
biological_process	GO:0051491	positive regulation of filopodium assembly	0	1	0	0.768727	1	1	1
biological_process	GO:0043406	positive regulation of MAP kinase activity	0	9	0	0.0935651	1	1	1
biological_process	GO:0061122	positive regulation of positive chemotaxis to cAMP	0	3	0	0.578838	0.793802	1	1
biological_process	GO:0051291	protein heterooligomerization	0	2	0	0.454199	1	1	1
biological_process	GO:0043491	protein kinase B signaling	0	1	0	0.942663	0.16115	1	1
biological_process	GO:0001558	regulation of cell growth	0	1	0	0.769499	0.650901	1	1
biological_process	GO:0030100	regulation of endocytosis	0	1	0	0.762515	0.395081	1	1
biological_process	GO:0090385	phagosome-lysosome fusion	0	11	0	0.0552354	1	1	1
biological_process	GO:0099638	endosome to plasma membrane protein transport	0	1	0	0.946544	0.409091	1	1
biological_process	GO:0061724	lipophagy	0	1	0	0.768727	1	1	1
biological_process	GO:1905162	regulation of phagosome maturation	0	2	0	0.590909	1	1	1
biological_process	GO:0043552	positive regulation of phosphatidylinositol 3-kinase activity	0	1	0	0.768727	1	1	1
biological_process	GO:0014068	positive regulation of phosphatidylinositol 3-kinase signaling	0	1	0	0.768727	1	1	1
biological_process	GO:0050927	positive regulation of positive chemotaxis	0	1	0	0.492631	0.841541	1	1
biological_process	GO:0046586	regulation of calcium-dependent cell-cell adhesion	0	1	0	0.768727	1	1	1
biological_process	GO:0001932	regulation of protein phosphorylation	0	1	0	0.518923	0.593664	1	1
biological_process	GO:2001135	regulation of endocytic recycling	0	1	0	0.987652	0.135671	1	1
biological_process	GO:0090182	regulation of secretion of lysosomal enzymes	0	1	0	0.768727	1	1	1
biological_process	GO:0016601	Rac protein signal transduction	0	3	0	0.724596	0.584691	1	1
biological_process	GO:2000145	regulation of cell motility	0	2	0	0.347377	0.906435	1	1
biological_process	GO:1902412	regulation of mitotic cytokinesis	0	2	0	0.454199	1	1	1
biological_process	GO:0006420	arginyl-tRNA aminoacylation	0	2	0	0.590909	1	1	1
biological_process	GO:0043039	tRNA aminoacylation	0	1	0	0.101251	0.953856	1	1
biological_process	GO:0006437	tyrosyl-tRNA aminoacylation	0	2	0	0.590909	1	1	1
biological_process	GO:0006435	threonyl-tRNA aminoacylation	0	2	0	0.590909	1	1	1
biological_process	GO:0006730	one-carbon metabolic process	0	6	0	0.514419	0.761548	1	1
biological_process	GO:0009113	purine nucleobase biosynthetic process	0	2	0	0.158459	1	1	1
biological_process	GO:0006164	purine nucleotide biosynthetic process	0	11	0	0.134109	0.927005	1	1
biological_process	GO:0016259	selenocysteine metabolic process	0	4	0	0.349099	1	1	1
biological_process	GO:0044571	[2Fe-2S] cluster assembly	0	2	0	0.590909	1	1	1
biological_process	GO:0018283	iron incorporation into metallo-sulfur cluster	0	2	0	0.590909	1	1	1
biological_process	GO:0043497	regulation of protein heterodimerization activity	0	1	0	0.768727	1	1	1
biological_process	GO:0031399	regulation of protein modification process	0	1	0	0.649161	0.4462	1	1
biological_process	GO:0019430	removal of superoxide radicals	0	8	0	0.121766	1	1	1
biological_process	GO:0042542	response to hydrogen peroxide	0	9	0	0.691757	0.507051	1	1
biological_process	GO:0032469	endoplasmic reticulum calcium ion homeostasis	0	3	0	0.454199	1	1	1
biological_process	GO:0097352	autophagosome maturation	0	5	0	0.206198	1	1	1
biological_process	GO:0016338	calcium-independent cell-cell adhesion via plasma membrane cell-adhesion molecules	0	4	0	0.349099	1	1	1
biological_process	GO:0001709	cell fate determination	0	1	0	0.768727	1	1	1
biological_process	GO:0000971	tRNA exon ligation utilizing 2',3' cyclic phosphate of 5'-exon as source of linkage phosphate	0	1	0	0.768727	1	1	1
biological_process	GO:0006779	porphyrin-containing compound biosynthetic process	0	1	0	0.0326008	1	1	1
biological_process	GO:0000492	box C/D snoRNP assembly	0	7	0	0.158459	1	1	1
biological_process	GO:0045903	positive regulation of translational fidelity	0	3	0	0.454199	1	1	1
biological_process	GO:0042981	regulation of apoptotic process	0	3	0	0.794357	0.507369	1	1
biological_process	GO:1902979	mitotic DNA replication termination	0	1	0	0.768727	1	1	1
biological_process	GO:0005980	glycogen catabolic process	0	3	0	0.454199	1	1	1
biological_process	GO:0035494	SNARE complex disassembly	0	2	0	0.590909	1	1	1
biological_process	GO:0006865	amino acid transport	0	10	0	0.0451192	0.993306	1	1
biological_process	GO:1990542	mitochondrial transmembrane transport	0	1	0	0.0784301	0.970952	1	1
biological_process	GO:0034724	DNA replication-independent chromatin organization	0	2	0	0.347377	0.906435	1	1
biological_process	GO:0019265	glycine biosynthetic process, by transamination of glyoxylate	0	1	0	0.768727	1	1	1
biological_process	GO:0046487	glyoxylate metabolic process	0	1	0	0.158459	1	1	1
biological_process	GO:0010950	positive regulation of endopeptidase activity	0	1	0	0.768727	1	1	1
biological_process	GO:0030163	protein catabolic process	0	2	0	0.254017	0.790568	1	1
biological_process	GO:2000045	regulation of G1/S transition of mitotic cell cycle	0	1	0	0.946544	0.409091	1	1
biological_process	GO:0061136	regulation of proteasomal protein catabolic process	0	2	0	0.343265	0.810297	1	1
biological_process	GO:0031990	mRNA export from nucleus in response to heat stress	0	1	0	0.768727	1	1	1
biological_process	GO:0045948	positive regulation of translational initiation	0	2	0	0.454199	1	1	1
biological_process	GO:0000055	ribosomal large subunit export from nucleus	0	7	0	0.158459	1	1	1
biological_process	GO:0000461	endonucleolytic cleavage to generate mature 3'-end of SSU-rRNA from (SSU-rRNA, 5.8S rRNA, LSU-rRNA)	0	1	0	0.768727	1	1	1
biological_process	GO:0042554	superoxide anion generation	0	5	0	0.268305	1	1	1
biological_process	GO:0006839	mitochondrial transport	0	5	0	0.119932	0.935806	1	1
biological_process	GO:0033353	S-adenosylmethionine cycle	0	1	0	0.349099	1	1	1
biological_process	GO:0034498	early endosome to Golgi transport	0	1	0	0.768727	1	1	1
biological_process	GO:0055088	lipid homeostasis	0	15	0	0.0147764	1	0.984	1
biological_process	GO:0006555	methionine metabolic process	0	2	0	0.514419	0.761548	1	1
biological_process	GO:0006556	S-adenosylmethionine biosynthetic process	0	2	0	0.590909	1	1	1
biological_process	GO:0006429	leucyl-tRNA aminoacylation	0	2	0	0.590909	1	1	1
biological_process	GO:0006613	cotranslational protein targeting to membrane	0	1	0	0.450569	0.803971	1	1
biological_process	GO:0031204	posttranslational protein targeting to membrane, translocation	0	4	0	0.349099	1	1	1
biological_process	GO:0006616	SRP-dependent cotranslational protein targeting to membrane, translocation	0	3	0	0.454199	1	1	1
biological_process	GO:0008643	carbohydrate transport	0	9	0	0.0718915	1	1	1
biological_process	GO:0030512	negative regulation of transforming growth factor beta receptor signaling pathway	0	1	0	0.768727	1	1	1
biological_process	GO:0031159	positive regulation of aggregate size involved in sorocarp development	0	3	0	0.454199	1	1	1
biological_process	GO:0008295	spermidine biosynthetic process	0	2	0	0.590909	1	1	1
biological_process	GO:0006427	histidyl-tRNA aminoacylation	0	2	0	0.590909	1	1	1
biological_process	GO:0032511	late endosome to vacuole transport via multivesicular body sorting pathway	0	7	0	0.196029	0.957564	1	1
biological_process	GO:0009450	gamma-aminobutyric acid catabolic process	0	1	0	0.768727	1	1	1
biological_process	GO:0072665	protein localization to vacuole	0	1	0	0.942507	0.125016	1	1
biological_process	GO:0006108	malate metabolic process	0	5	0	0.268305	1	1	1
biological_process	GO:0006090	pyruvate metabolic process	0	1	0	0.647349	0.536143	1	1
biological_process	GO:0070084	protein initiator methionine removal	0	3	0	0.454199	1	1	1
biological_process	GO:0006107	oxaloacetate metabolic process	0	5	0	0.268305	1	1	1
biological_process	GO:0006835	dicarboxylic acid transport	0	1	0	0.867639	0.346925	1	1
biological_process	GO:0071423	malate transmembrane transport	0	1	0	0.768727	1	1	1
biological_process	GO:0015729	oxaloacetate transport	0	2	0	0.590909	1	1	1
biological_process	GO:0035435	phosphate ion transmembrane transport	0	3	0	0.454199	1	1	1
biological_process	GO:0071422	succinate transmembrane transport	0	1	0	0.768727	1	1	1
biological_process	GO:0008272	sulfate transport	0	2	0	0.590909	1	1	1
biological_process	GO:0015709	thiosulfate transport	0	1	0	0.768727	1	1	1
biological_process	GO:1902610	response to N-phenylthiourea	0	2	0	0.590909	1	1	1
biological_process	GO:0006572	tyrosine catabolic process	0	6	0	0.206198	1	1	1
biological_process	GO:0061077	chaperone-mediated protein folding	0	7	0	0.691757	0.507051	1	1
biological_process	GO:0006097	glyoxylate cycle	0	6	0	0.206198	1	1	1
biological_process	GO:0001731	formation of translation preinitiation complex	0	8	0	0.121766	1	1	1
biological_process	GO:0033499	galactose catabolic process via UDP-galactose	0	1	0	0.768727	1	1	1
biological_process	GO:0019509	L-methionine salvage from methylthioadenosine	0	4	0	0.349099	1	1	1
biological_process	GO:0019284	L-methionine salvage from S-adenosylmethionine	0	3	0	0.454199	1	1	1
biological_process	GO:0006259	DNA metabolic process	0	1	0	0.97989	0.0275006	1	1
biological_process	GO:0097428	protein maturation by iron-sulfur cluster transfer	0	6	0	0.0935651	1	1	1
biological_process	GO:0006210	thymine catabolic process	0	2	0	0.590909	1	1	1
biological_process	GO:0006574	valine catabolic process	0	10	0	0.0718915	1	1	1
biological_process	GO:0000912	assembly of actomyosin apparatus involved in cytokinesis	0	1	0	0.987652	0.135671	1	1
biological_process	GO:0030046	parallel actin filament bundle assembly	0	1	0	0.768727	1	1	1
biological_process	GO:0030261	chromosome condensation	0	2	0	0.995283	0.0236182	1	1
biological_process	GO:0006308	DNA catabolic process	0	3	0	0.910625	0.275404	1	1
biological_process	GO:0033615	mitochondrial proton-transporting ATP synthase complex assembly	0	5	0	0.268305	1	1	1
biological_process	GO:0033108	mitochondrial respiratory chain complex assembly	0	1	0	0.00368795	0.999634	0.606	1
biological_process	GO:0045041	protein import into mitochondrial intermembrane space	0	3	0	0.454199	1	1	1
biological_process	GO:0051900	regulation of mitochondrial depolarization	0	1	0	0.768727	1	1	1
biological_process	GO:1902882	regulation of response to oxidative stress	0	1	0	0.946544	0.409091	1	1
biological_process	GO:0006526	arginine biosynthetic process	0	5	0	0.268305	1	1	1
biological_process	GO:0006021	inositol biosynthetic process	0	2	0	0.590909	1	1	1
biological_process	GO:1903725	regulation of phospholipid metabolic process	0	1	0	0.590909	1	1	1
biological_process	GO:1900275	negative regulation of phospholipase C activity	0	2	0	0.590909	1	1	1
biological_process	GO:0051259	protein complex oligomerization	0	4	0	0.31756	0.840395	1	1
biological_process	GO:0009651	response to salt stress	0	3	0	0.92479	0.180114	1	1
biological_process	GO:0034599	cellular response to oxidative stress	0	19	0	0.131545	0.937347	1	1
biological_process	GO:0070407	oxidation-dependent protein catabolic process	0	2	0	0.590909	1	1	1
biological_process	GO:0006515	protein quality control for misfolded or incompletely synthesized proteins	0	6	0	0.514419	0.761548	1	1
biological_process	GO:0034354	'de novo' NAD biosynthetic process from tryptophan	0	3	0	0.454199	1	1	1
biological_process	GO:0043420	anthranilate metabolic process	0	3	0	0.454199	1	1	1
biological_process	GO:0070189	kynurenine metabolic process	0	1	0	0.268305	1	1	1
biological_process	GO:0019674	NAD metabolic process	0	2	0	0.794357	0.507369	1	1
biological_process	GO:0019805	quinolinate biosynthetic process	0	3	0	0.349099	1	1	1
biological_process	GO:0006569	tryptophan catabolic process	0	2	0	0.268305	1	1	1
biological_process	GO:0030042	actin filament depolymerization	0	10	0	0.185931	0.927697	1	1
biological_process	GO:0051014	actin filament severing	0	11	0	0.042436	1	1	1
biological_process	GO:0006208	pyrimidine nucleobase catabolic process	0	1	0	0.454199	1	1	1
biological_process	GO:0022900	electron transport chain	0	5	0	0.011322	0.997268	0.943	1
biological_process	GO:0106035	protein maturation by [4Fe-4S] cluster transfer	0	4	0	0.349099	1	1	1
biological_process	GO:0006750	glutathione biosynthetic process	0	2	0	0.590909	1	1	1
biological_process	GO:0006695	cholesterol biosynthetic process	0	10	0	0.0718915	1	1	1
biological_process	GO:0045338	farnesyl diphosphate metabolic process	0	1	0	0.121766	1	1	1
biological_process	GO:0008299	isoprenoid biosynthetic process	0	7	0	0.00465969	0.999524	0.697	1
biological_process	GO:0045337	farnesyl diphosphate biosynthetic process	0	4	0	0.158459	1	1	1
biological_process	GO:0033384	geranyl diphosphate biosynthetic process	0	4	0	0.349099	1	1	1
biological_process	GO:0009410	response to xenobiotic stimulus	0	1	0	0.531663	0.634842	1	1
biological_process	GO:0006783	heme biosynthetic process	0	10	0	0.042436	1	1	1
biological_process	GO:0042351	'de novo' GDP-L-fucose biosynthetic process	0	2	0	0.590909	1	1	1
biological_process	GO:0019673	GDP-mannose metabolic process	0	1	0	0.206198	1	1	1
biological_process	GO:0046705	CDP biosynthetic process	0	1	0	0.768727	1	1	1
biological_process	GO:0043173	nucleotide salvage	0	1	0	0.042436	1	1	1
biological_process	GO:0043100	pyrimidine nucleobase salvage	0	1	0	0.768727	1	1	1
biological_process	GO:0006225	UDP biosynthetic process	0	1	0	0.768727	1	1	1
biological_process	GO:0006119	oxidative phosphorylation	0	2	0	0.00644887	0.99887	0.8	1
biological_process	GO:0006636	unsaturated fatty acid biosynthetic process	0	2	0	0.590909	1	1	1
biological_process	GO:0006091	generation of precursor metabolites and energy	0	2	0	1.37365e-05	0.999996	0.003	1
biological_process	GO:0006043	glucosamine catabolic process	0	1	0	0.768727	1	1	1
biological_process	GO:0006046	N-acetylglucosamine catabolic process	0	1	0	0.768727	1	1	1
biological_process	GO:0019262	N-acetylneuraminate catabolic process	0	1	0	0.768727	1	1	1
biological_process	GO:0045454	cell redox homeostasis	0	19	0	0.00669424	1	0.833	1
biological_process	GO:0006782	protoporphyrinogen IX biosynthetic process	0	7	0	0.158459	1	1	1
biological_process	GO:0030203	glycosaminoglycan metabolic process	0	5	0	0.0185147	0.997673	0.993	1
biological_process	GO:0042543	protein N-linked glycosylation via arginine	0	1	0	0.768727	1	1	1
biological_process	GO:0000494	box C/D RNA 3'-end processing	0	3	0	0.454199	1	1	1
biological_process	GO:1990258	histone glutamine methylation	0	2	0	0.590909	1	1	1
biological_process	GO:0031167	rRNA methylation	0	6	0	0.210212	0.93039	1	1
biological_process	GO:0016074	sno(s)RNA metabolic process	0	1	0	0.514419	0.761548	1	1
biological_process	GO:0046901	tetrahydrofolylpolyglutamate biosynthetic process	0	1	0	0.768727	1	1	1
biological_process	GO:0019464	glycine decarboxylation via glycine cleavage system	0	8	0	0.121766	1	1	1
biological_process	GO:0009249	protein lipoylation	0	8	0	0.121766	1	1	1
biological_process	GO:0014070	response to organic cyclic compound	0	1	0	0.876518	0.176213	1	1
biological_process	GO:0035269	protein O-linked mannosylation	0	5	0	0.268305	1	1	1
biological_process	GO:0034605	cellular response to heat	0	4	0	0.158459	1	1	1
biological_process	GO:0098742	cell-cell adhesion via plasma-membrane adhesion molecules	0	2	0	0.587881	0.661848	1	1
biological_process	GO:0007156	homophilic cell adhesion via plasma membrane adhesion molecules	0	1	0	0.768727	1	1	1
biological_process	GO:2000009	negative regulation of protein localization to cell surface	0	1	0	0.768727	1	1	1
biological_process	GO:1902306	negative regulation of sodium ion transmembrane transport	0	1	0	0.768727	1	1	1
biological_process	GO:0031398	positive regulation of protein ubiquitination	0	1	0	0.349099	1	1	1
biological_process	GO:0006814	sodium ion transport	0	2	0	0.206198	1	1	1
biological_process	GO:0033683	nucleotide-excision repair, DNA incision	0	3	0	0.206198	1	1	1
biological_process	GO:0009650	UV protection	0	1	0	0.768727	1	1	1
biological_process	GO:0000350	generation of catalytic spliceosome for second transesterification step	0	2	0	0.590909	1	1	1
biological_process	GO:0000389	mRNA 3'-splice site recognition	0	1	0	0.768727	1	1	1
biological_process	GO:0071333	cellular response to glucose stimulus	0	3	0	0.268305	1	1	1
biological_process	GO:0071500	cellular response to nitrosative stress	0	2	0	0.590909	1	1	1
biological_process	GO:0046210	nitric oxide catabolic process	0	2	0	0.590909	1	1	1
biological_process	GO:0009636	response to toxic substance	0	2	0	0.0192374	1	0.995	1
biological_process	GO:0006796	phosphate-containing compound metabolic process	0	2	0	0.0406108	0.968034	1	1
biological_process	GO:0016180	snRNA processing	0	3	0	0.806672	0.354209	1	1
biological_process	GO:0006122	mitochondrial electron transport, ubiquinol to cytochrome c	0	7	0	0.158459	1	1	1
biological_process	GO:0019343	cysteine biosynthetic process via cystathionine	0	2	0	0.590909	1	1	1
biological_process	GO:0006534	cysteine metabolic process	0	2	0	0.578838	0.793802	1	1
biological_process	GO:0009060	aerobic respiration	0	9	0	0.000301773	0.999939	0.081	1
biological_process	GO:0015990	electron transport coupled proton transport	0	4	0	0.349099	1	1	1
biological_process	GO:0006123	mitochondrial electron transport, cytochrome c to oxygen	0	5	0	0.268305	1	1	1
biological_process	GO:0006020	inositol metabolic process	0	2	0	0.206198	1	1	1
biological_process	GO:0010226	response to lithium ion	0	5	0	0.492631	0.841541	1	1
biological_process	GO:0051304	chromosome separation	0	1	0	0.900422	0.186264	1	1
biological_process	GO:0033316	meiotic spindle assembly checkpoint signaling	0	1	0	0.768727	1	1	1
biological_process	GO:0034501	protein localization to kinetochore	0	2	0	0.590909	1	1	1
biological_process	GO:0009435	NAD biosynthetic process	0	4	0	0.158459	1	1	1
biological_process	GO:0045050	protein insertion into ER membrane by stop-transfer membrane-anchor sequence	0	4	0	0.349099	1	1	1
biological_process	GO:0071816	tail-anchored membrane protein insertion into ER membrane	0	3	0	0.454199	1	1	1
biological_process	GO:0031930	mitochondria-nucleus signaling pathway	0	1	0	0.768727	1	1	1
biological_process	GO:0045861	negative regulation of proteolysis	0	2	0	0.864329	0.545801	1	1
biological_process	GO:0002184	cytoplasmic translational termination	0	2	0	0.590909	1	1	1
biological_process	GO:0030308	negative regulation of cell growth	0	2	0	0.590909	1	1	1
biological_process	GO:0051093	negative regulation of developmental process	0	3	0	0.982999	0.0548353	1	1
biological_process	GO:0045744	negative regulation of G protein-coupled receptor signaling pathway	0	1	0	0.915332	0.327722	1	1
biological_process	GO:0061123	negative regulation of positive chemotaxis to cAMP	0	2	0	0.590909	1	1	1
biological_process	GO:1903077	negative regulation of protein localization to plasma membrane	0	1	0	0.768727	1	1	1
biological_process	GO:0032263	GMP salvage	0	1	0	0.768727	1	1	1
biological_process	GO:0006178	guanine salvage	0	1	0	0.768727	1	1	1
biological_process	GO:0046100	hypoxanthine metabolic process	0	1	0	0.590909	1	1	1
biological_process	GO:0032264	IMP salvage	0	2	0	0.590909	1	1	1
biological_process	GO:0006166	purine ribonucleoside salvage	0	4	0	0.349099	1	1	1
biological_process	GO:0046491	L-methylmalonyl-CoA metabolic process	0	1	0	0.768727	1	1	1
biological_process	GO:0097053	L-kynurenine catabolic process	0	2	0	0.590909	1	1	1
biological_process	GO:0006480	N-terminal protein amino acid methylation	0	2	0	0.590909	1	1	1
biological_process	GO:0019544	arginine catabolic process to glutamate	0	1	0	0.768727	1	1	1
biological_process	GO:0010121	arginine catabolic process to proline via ornithine	0	1	0	0.768727	1	1	1
biological_process	GO:0006591	ornithine metabolic process	0	1	0	0.349099	1	1	1
biological_process	GO:0006106	fumarate metabolic process	0	1	0	0.946544	0.409091	1	1
biological_process	GO:0015880	coenzyme A transport	0	2	0	0.590909	1	1	1
biological_process	GO:0006482	protein demethylation	0	1	0	0.590909	1	1	1
biological_process	GO:0035304	regulation of protein dephosphorylation	0	1	0	0.58237	0.711372	1	1
biological_process	GO:0046656	folic acid biosynthetic process	0	3	0	0.454199	1	1	1
biological_process	GO:0046654	tetrahydrofolate biosynthetic process	0	3	0	0.454199	1	1	1
biological_process	GO:0006450	regulation of translational fidelity	0	4	0	0.158459	1	1	1
biological_process	GO:0000086	G2/M transition of mitotic cell cycle	0	1	0	0.913387	0.236427	1	1
biological_process	GO:0010971	positive regulation of G2/M transition of mitotic cell cycle	0	1	0	0.768727	1	1	1
biological_process	GO:0110032	positive regulation of G2/MI transition of meiotic cell cycle	0	1	0	0.768727	1	1	1
biological_process	GO:0015940	pantothenate biosynthetic process	0	2	0	0.590909	1	1	1
biological_process	GO:0048024	regulation of mRNA splicing, via spliceosome	0	2	0	0.864329	0.545801	1	1
biological_process	GO:0006821	chloride transport	0	2	0	0.349099	1	1	1
biological_process	GO:0006777	Mo-molybdopterin cofactor biosynthetic process	0	6	0	0.206198	1	1	1
biological_process	GO:0019310	inositol catabolic process	0	1	0	0.768727	1	1	1
biological_process	GO:0006729	tetrahydrobiopterin biosynthetic process	0	7	0	0.158459	1	1	1
biological_process	GO:0018063	cytochrome c-heme linkage	0	1	0	0.768727	1	1	1
biological_process	GO:0050709	negative regulation of protein secretion	0	1	0	0.768727	1	1	1
biological_process	GO:0050714	positive regulation of protein secretion	0	1	0	0.768727	1	1	1
biological_process	GO:0051453	regulation of intracellular pH	0	5	0	0.994727	0.0172226	1	1
biological_process	GO:0045920	negative regulation of exocytosis	0	2	0	0.590909	1	1	1
biological_process	GO:0000717	nucleotide-excision repair, DNA duplex unwinding	0	1	0	0.768727	1	1	1
biological_process	GO:0045951	positive regulation of mitotic recombination	0	1	0	0.768727	1	1	1
biological_process	GO:0001676	long-chain fatty acid metabolic process	0	3	0	0.530115	0.709838	1	1
biological_process	GO:0019243	methylglyoxal catabolic process to D-lactate via S-lactoyl-glutathione	0	2	0	0.590909	1	1	1
biological_process	GO:0006233	dTDP biosynthetic process	0	1	0	0.768727	1	1	1
biological_process	GO:0006235	dTTP biosynthetic process	0	2	0	0.590909	1	1	1
biological_process	GO:0006227	dUDP biosynthetic process	0	1	0	0.768727	1	1	1
biological_process	GO:0000338	protein deneddylation	0	5	0	0.268305	1	1	1
biological_process	GO:0006182	cGMP biosynthetic process	0	2	0	0.590909	1	1	1
biological_process	GO:1904360	negative regulation of spore germination	0	1	0	0.768727	1	1	1
biological_process	GO:2000481	positive regulation of cAMP-dependent protein kinase activity	0	1	0	0.768727	1	1	1
biological_process	GO:0007168	receptor guanylyl cyclase signaling pathway	0	2	0	0.590909	1	1	1
biological_process	GO:0030104	water homeostasis	0	1	0	0.945556	0.205643	1	1
biological_process	GO:0036089	cleavage furrow formation	0	2	0	0.349099	1	1	1
biological_process	GO:0003382	epithelial cell morphogenesis	0	1	0	0.768727	1	1	1
biological_process	GO:0051495	positive regulation of cytoskeleton organization	0	5	0	0.748887	0.370608	1	1
biological_process	GO:0000495	box H/ACA RNA 3'-end processing	0	1	0	0.768727	1	1	1
biological_process	GO:1990481	mRNA pseudouridine synthesis	0	5	0	0.268305	1	1	1
biological_process	GO:0031118	rRNA pseudouridine synthesis	0	3	0	0.0935651	1	1	1
biological_process	GO:0031120	snRNA pseudouridine synthesis	0	3	0	0.454199	1	1	1
biological_process	GO:0006032	chitin catabolic process	0	5	0	0.268305	1	1	1
biological_process	GO:1905861	intranuclear rod assembly	0	2	0	0.590909	1	1	1
biological_process	GO:1903673	mitotic cleavage furrow formation	0	2	0	0.590909	1	1	1
biological_process	GO:0043521	regulation of myosin II filament disassembly	0	1	0	0.768727	1	1	1
biological_process	GO:0051707	response to other organism	0	6	0	0.0195288	0.988742	0.995	1
biological_process	GO:0032970	regulation of actin filament-based process	0	1	0	0.694887	0.383664	1	1
biological_process	GO:0034213	quinolinate catabolic process	0	1	0	0.768727	1	1	1
biological_process	GO:0006528	asparagine metabolic process	0	2	0	0.349099	1	1	1
biological_process	GO:0010446	response to alkaline pH	0	2	0	0.590909	1	1	1
biological_process	GO:0051156	glucose 6-phosphate metabolic process	0	1	0	0.121766	1	1	1
biological_process	GO:1902969	mitotic DNA replication	0	1	0	0.238452	0.944765	1	1
biological_process	GO:0000032	cell wall mannoprotein biosynthetic process	0	2	0	0.590909	1	1	1
biological_process	GO:0009298	GDP-mannose biosynthetic process	0	5	0	0.268305	1	1	1
biological_process	GO:0006696	ergosterol biosynthetic process	0	3	0	0.454199	1	1	1
biological_process	GO:0001561	fatty acid alpha-oxidation	0	2	0	0.590909	1	1	1
biological_process	GO:0005978	glycogen biosynthetic process	0	2	0	0.590909	1	1	1
biological_process	GO:0046296	glycolate catabolic process	0	1	0	0.768727	1	1	1
biological_process	GO:0006163	purine nucleotide metabolic process	0	1	0	0.0164508	0.991695	0.986	1
biological_process	GO:1901605	alpha-amino acid metabolic process	0	2	0	8.38442e-05	0.999974	0.018	1
biological_process	GO:0016139	glycoside catabolic process	0	4	0	0.349099	1	1	1
biological_process	GO:0046477	glycosylceramide catabolic process	0	2	0	0.590909	1	1	1
biological_process	GO:0009311	oligosaccharide metabolic process	0	4	0	0.492631	0.841541	1	1
biological_process	GO:0006000	fructose metabolic process	0	6	0	0.206198	1	1	1
biological_process	GO:0051702	biological process involved in interaction with symbiont	0	1	0	0.590909	1	1	1
biological_process	GO:0018002	N-terminal peptidyl-glutamic acid acetylation	0	1	0	0.768727	1	1	1
biological_process	GO:0017198	N-terminal peptidyl-serine acetylation	0	1	0	0.768727	1	1	1
biological_process	GO:0070476	rRNA (guanine-N7)-methylation	0	2	0	0.590909	1	1	1
biological_process	GO:0019344	cysteine biosynthetic process	0	2	0	0.454199	1	1	1
biological_process	GO:0006535	cysteine biosynthetic process from serine	0	2	0	0.590909	1	1	1
biological_process	GO:2000060	positive regulation of ubiquitin-dependent protein catabolic process	0	1	0	0.31756	0.840395	1	1
biological_process	GO:0015986	ATP synthesis coupled proton transport	0	9	0	0.0552354	1	1	1
biological_process	GO:0046688	response to copper ion	0	1	0	0.590909	1	1	1
biological_process	GO:0015811	L-cystine transport	0	2	0	0.590909	1	1	1
biological_process	GO:0023058	adaptation of signaling pathway	0	1	0	0.864329	0.545801	1	1
biological_process	GO:0002029	desensitization of G protein-coupled receptor signaling pathway	0	1	0	0.864329	0.545801	1	1
biological_process	GO:0007389	pattern specification process	0	1	0	0.768727	1	1	1
biological_process	GO:0006743	ubiquinone metabolic process	0	2	0	0.0406507	0.99066	1	1
biological_process	GO:0018315	molybdenum incorporation into molybdenum-molybdopterin complex	0	1	0	0.768727	1	1	1
biological_process	GO:0032324	molybdopterin cofactor biosynthetic process	0	1	0	0.768727	1	1	1
biological_process	GO:0006226	dUMP biosynthetic process	0	1	0	0.768727	1	1	1
biological_process	GO:0046081	dUTP catabolic process	0	1	0	0.768727	1	1	1
biological_process	GO:0009213	pyrimidine deoxyribonucleoside triphosphate catabolic process	0	1	0	0.768727	1	1	1
biological_process	GO:0032088	negative regulation of NF-kappaB transcription factor activity	0	2	0	0.590909	1	1	1
biological_process	GO:0033209	tumor necrosis factor-mediated signaling pathway	0	1	0	0.768727	1	1	1
biological_process	GO:0033539	fatty acid beta-oxidation using acyl-CoA dehydrogenase	0	2	0	0.590909	1	1	1
biological_process	GO:0002143	tRNA wobble position uridine thiolation	0	4	0	0.349099	1	1	1
biological_process	GO:0045787	positive regulation of cell cycle	0	1	0	0.696659	0.5254	1	1
biological_process	GO:0033120	positive regulation of RNA splicing	0	1	0	0.946544	0.409091	1	1
biological_process	GO:0071586	CAAX-box protein processing	0	6	0	0.206198	1	1	1
biological_process	GO:0006621	protein retention in ER lumen	0	2	0	0.590909	1	1	1
biological_process	GO:1902000	homogentisate catabolic process	0	1	0	0.768727	1	1	1
biological_process	GO:0009446	putrescine biosynthetic process	0	2	0	0.590909	1	1	1
biological_process	GO:0006557	S-adenosylmethioninamine biosynthetic process	0	1	0	0.768727	1	1	1
biological_process	GO:0006597	spermine biosynthetic process	0	1	0	0.768727	1	1	1
biological_process	GO:0005986	sucrose biosynthetic process	0	1	0	0.768727	1	1	1
biological_process	GO:0006098	pentose-phosphate shunt	0	3	0	0.158459	1	1	1
biological_process	GO:0006825	copper ion transport	0	1	0	0.768727	1	1	1
biological_process	GO:0016125	sterol metabolic process	0	4	0	0.000620636	1	0.143	1
biological_process	GO:0006388	tRNA splicing, via endonucleolytic cleavage and ligation	0	5	0	0.0935651	1	1	1
biological_process	GO:0071042	nuclear polyadenylation-dependent mRNA catabolic process	0	3	0	0.454199	1	1	1
biological_process	GO:0034473	U1 snRNA 3'-end processing	0	3	0	0.454199	1	1	1
biological_process	GO:0034476	U5 snRNA 3'-end processing	0	3	0	0.454199	1	1	1
biological_process	GO:0018343	protein farnesylation	0	2	0	0.590909	1	1	1
biological_process	GO:0018342	protein prenylation	0	4	0	0.158459	1	1	1
biological_process	GO:0046949	fatty-acyl-CoA biosynthetic process	0	1	0	0.768727	1	1	1
biological_process	GO:0006568	tryptophan metabolic process	0	1	0	0.206198	1	1	1
biological_process	GO:0000747	conjugation with cellular fusion	0	1	0	0.768727	1	1	1
biological_process	GO:0019563	glycerol catabolic process	0	5	0	0.268305	1	1	1
biological_process	GO:0006071	glycerol metabolic process	0	4	0	0.121766	1	1	1
biological_process	GO:0046167	glycerol-3-phosphate biosynthetic process	0	2	0	0.590909	1	1	1
biological_process	GO:0006641	triglyceride metabolic process	0	2	0	0.347377	0.906435	1	1
biological_process	GO:0031116	positive regulation of microtubule polymerization	0	1	0	0.768727	1	1	1
biological_process	GO:0072488	ammonium transmembrane transport	0	4	0	0.268305	1	1	1
biological_process	GO:0007588	excretion	0	3	0	0.454199	1	1	1
biological_process	GO:0046033	AMP metabolic process	0	3	0	0.158459	1	1	1
biological_process	GO:0001708	cell fate specification	0	3	0	0.349099	1	1	1
biological_process	GO:0006188	IMP biosynthetic process	0	1	0	0.347377	0.906435	1	1
biological_process	GO:0009167	purine ribonucleoside monophosphate metabolic process	0	1	0	0.247599	0.913849	1	1
biological_process	GO:0019740	nitrogen utilization	0	1	0	0.768727	1	1	1
biological_process	GO:0006529	asparagine biosynthetic process	0	2	0	0.590909	1	1	1
biological_process	GO:0070981	L-asparagine biosynthetic process	0	1	0	0.768727	1	1	1
biological_process	GO:0022409	positive regulation of cell-cell adhesion	0	1	0	0.768727	1	1	1
biological_process	GO:0043938	positive regulation of sporulation	0	2	0	0.454199	1	1	1
biological_process	GO:1902846	positive regulation of mitotic spindle elongation	0	1	0	0.768727	1	1	1
biological_process	GO:0046827	positive regulation of protein export from nucleus	0	1	0	0.768727	1	1	1
biological_process	GO:0030155	regulation of cell adhesion	0	1	0	0.961717	0.109994	1	1
biological_process	GO:0009142	nucleoside triphosphate biosynthetic process	0	4	0	0.0117481	0.998628	0.959	1
biological_process	GO:0006986	response to unfolded protein	0	1	0	0.898358	0.202879	1	1
biological_process	GO:0031148	DIF-1 biosynthetic process	0	2	0	0.590909	1	1	1
biological_process	GO:0010942	positive regulation of cell death	0	1	0	0.590909	1	1	1
biological_process	GO:0006004	fucose metabolic process	0	2	0	0.590909	1	1	1
biological_process	GO:0019388	galactose catabolic process	0	1	0	0.590909	1	1	1
biological_process	GO:0006012	galactose metabolic process	0	4	0	0.268305	1	1	1
biological_process	GO:0036085	GDP-fucose import into Golgi lumen	0	1	0	0.768727	1	1	1
biological_process	GO:0036066	protein O-linked fucosylation	0	1	0	0.768727	1	1	1
biological_process	GO:0006491	N-glycan processing	0	7	0	0.121766	1	1	1
biological_process	GO:0043687	post-translational protein modification	0	2	0	0.158459	1	1	1
biological_process	GO:0006651	diacylglycerol biosynthetic process	0	1	0	0.768727	1	1	1
biological_process	GO:0006640	monoacylglycerol biosynthetic process	0	2	0	0.590909	1	1	1
biological_process	GO:0006995	cellular response to nitrogen starvation	0	8	0	0.121766	1	1	1
biological_process	GO:0001878	response to yeast	0	4	0	0.349099	1	1	1
biological_process	GO:0006139	nucleobase-containing compound metabolic process	0	2	0	0.959502	0.0470841	1	1
biological_process	GO:0015680	protein maturation by copper ion transfer	0	1	0	0.768727	1	1	1
biological_process	GO:0000245	spliceosomal complex assembly	0	5	0	0.288628	0.928109	1	1
biological_process	GO:0046037	GMP metabolic process	0	1	0	0.864329	0.545801	1	1
biological_process	GO:0072666	establishment of protein localization to vacuole	0	1	0	0.930971	0.158803	1	1
biological_process	GO:0051343	positive regulation of cyclic-nucleotide phosphodiesterase activity	0	1	0	0.768727	1	1	1
biological_process	GO:0051284	positive regulation of sequestering of calcium ion	0	1	0	0.768727	1	1	1
biological_process	GO:0043549	regulation of kinase activity	0	1	0	0.649853	0.46217	1	1
biological_process	GO:0051016	barbed-end actin filament capping	0	7	0	0.121766	1	1	1
biological_process	GO:0006694	steroid biosynthetic process	0	8	0	0.000126826	1	0.034	1
biological_process	GO:0045333	cellular respiration	0	2	0	0.000370204	0.999913	0.092	1
biological_process	GO:0033387	putrescine biosynthetic process from ornithine	0	1	0	0.768727	1	1	1
biological_process	GO:0008283	cell population proliferation	0	1	0	0.98938	0.0382827	1	1
biological_process	GO:0045116	protein neddylation	0	8	0	0.121766	1	1	1
biological_process	GO:0031647	regulation of protein stability	0	1	0	0.347377	0.906435	1	1
biological_process	GO:0051438	regulation of ubiquitin-protein transferase activity	0	1	0	0.349099	1	1	1
biological_process	GO:0042773	ATP synthesis coupled electron transport	0	4	0	0.0223762	0.99534	0.997	1
biological_process	GO:0030026	cellular manganese ion homeostasis	0	4	0	0.349099	1	1	1
biological_process	GO:0055072	iron ion homeostasis	0	2	0	0.196029	0.957564	1	1
biological_process	GO:0006826	iron ion transport	0	1	0	0.864329	0.545801	1	1
biological_process	GO:0006015	5-phosphoribose 1-diphosphate biosynthetic process	0	3	0	0.454199	1	1	1
biological_process	GO:0009156	ribonucleoside monophosphate biosynthetic process	0	1	0	0.185931	0.927697	1	1
biological_process	GO:0006536	glutamate metabolic process	0	4	0	0.210212	0.93039	1	1
biological_process	GO:2000813	negative regulation of barbed-end actin filament capping	0	1	0	0.768727	1	1	1
biological_process	GO:2000812	regulation of barbed-end actin filament capping	0	1	0	0.768727	1	1	1
biological_process	GO:0042255	ribosome assembly	0	2	0	0.0570407	0.979957	1	1
biological_process	GO:0006072	glycerol-3-phosphate metabolic process	0	1	0	0.454199	1	1	1
biological_process	GO:0032957	inositol trisphosphate metabolic process	0	2	0	0.454199	1	1	1
biological_process	GO:0002926	tRNA wobble base 5-methoxycarbonylmethyl-2-thiouridinylation	0	2	0	0.590909	1	1	1
biological_process	GO:1990443	peptidyl-threonine autophosphorylation	0	1	0	0.768727	1	1	1
biological_process	GO:0038083	peptidyl-tyrosine autophosphorylation	0	1	0	0.768727	1	1	1
biological_process	GO:0050921	positive regulation of chemotaxis	0	2	0	0.347377	0.906435	1	1
biological_process	GO:0006084	acetyl-CoA metabolic process	0	2	0	0.530115	0.709838	1	1
biological_process	GO:0010142	farnesyl diphosphate biosynthetic process, mevalonate pathway	0	3	0	0.454199	1	1	1
biological_process	GO:0006850	mitochondrial pyruvate transmembrane transport	0	2	0	0.590909	1	1	1
biological_process	GO:0010265	SCF complex assembly	0	5	0	0.268305	1	1	1
biological_process	GO:0018344	protein geranylgeranylation	0	5	0	0.268305	1	1	1
biological_process	GO:0006666	3-keto-sphinganine metabolic process	0	3	0	0.454199	1	1	1
biological_process	GO:0043545	molybdopterin cofactor metabolic process	0	1	0	0.206198	1	1	1
biological_process	GO:0045046	protein import into peroxisome membrane	0	2	0	0.590909	1	1	1
biological_process	GO:0006269	DNA replication, synthesis of RNA primer	0	2	0	0.590909	1	1	1
biological_process	GO:0006477	protein sulfation	0	1	0	0.768727	1	1	1
biological_process	GO:0046514	ceramide catabolic process	0	2	0	0.349099	1	1	1
biological_process	GO:0006672	ceramide metabolic process	0	6	0	0.0696101	0.988651	1	1
biological_process	GO:0042759	long-chain fatty acid biosynthetic process	0	3	0	0.454199	1	1	1
biological_process	GO:0042776	mitochondrial ATP synthesis coupled proton transport	0	3	0	0.349099	1	1	1
biological_process	GO:0008611	ether lipid biosynthetic process	0	2	0	0.590909	1	1	1
biological_process	GO:0140042	lipid droplet formation	0	2	0	0.590909	1	1	1
biological_process	GO:0046177	D-gluconate catabolic process	0	2	0	0.590909	1	1	1
biological_process	GO:0006296	nucleotide-excision repair, DNA incision, 5'-to lesion	0	3	0	0.454199	1	1	1
biological_process	GO:0070914	UV-damage excision repair	0	1	0	0.590909	1	1	1
biological_process	GO:0043137	DNA replication, removal of RNA primer	0	3	0	0.454199	1	1	1
biological_process	GO:0070125	mitochondrial translational elongation	0	4	0	0.349099	1	1	1
biological_process	GO:1905634	regulation of protein localization to chromatin	0	1	0	0.768727	1	1	1
biological_process	GO:1905099	positive regulation of guanyl-nucleotide exchange factor activity	0	1	0	0.768727	1	1	1
biological_process	GO:0010863	positive regulation of phospholipase C activity	0	1	0	0.768727	1	1	1
biological_process	GO:1990547	mitochondrial phosphate ion transmembrane transport	0	2	0	0.590909	1	1	1
biological_process	GO:0046655	folic acid metabolic process	0	3	0	0.158459	1	1	1
biological_process	GO:0019264	glycine biosynthetic process from serine	0	2	0	0.590909	1	1	1
biological_process	GO:0046653	tetrahydrofolate metabolic process	0	2	0	0.514419	0.761548	1	1
biological_process	GO:0033512	L-lysine catabolic process to acetyl-CoA via saccharopine	0	2	0	0.590909	1	1	1
biological_process	GO:0070588	calcium ion transmembrane transport	0	8	0	0.391666	0.839541	1	1
biological_process	GO:0050848	regulation of calcium-mediated signaling	0	5	0	0.578838	0.793802	1	1
biological_process	GO:1990575	mitochondrial L-ornithine transmembrane transport	0	3	0	0.454199	1	1	1
biological_process	GO:0048250	iron import into the mitochondrion	0	1	0	0.768727	1	1	1
biological_process	GO:0000741	karyogamy	0	1	0	0.768727	1	1	1
biological_process	GO:0071456	cellular response to hypoxia	0	2	0	0.590909	1	1	1
biological_process	GO:0072592	oxygen metabolic process	0	1	0	0.768727	1	1	1
biological_process	GO:0018401	peptidyl-proline hydroxylation to 4-hydroxy-L-proline	0	7	0	0.158459	1	1	1
biological_process	GO:0055074	calcium ion homeostasis	0	2	0	0.645791	0.554814	1	1
biological_process	GO:0033617	mitochondrial cytochrome c oxidase assembly	0	9	0	0.0935651	1	1	1
biological_process	GO:0000480	endonucleolytic cleavage in 5'-ETS of tricistronic rRNA transcript (SSU-rRNA, 5.8S rRNA, LSU-rRNA)	0	3	0	0.454199	1	1	1
biological_process	GO:0000472	endonucleolytic cleavage to generate mature 5'-end of SSU-rRNA from (SSU-rRNA, 5.8S rRNA, LSU-rRNA)	0	3	0	0.454199	1	1	1
biological_process	GO:0034462	small-subunit processome assembly	0	1	0	0.768727	1	1	1
biological_process	GO:0071034	CUT catabolic process	0	2	0	0.864329	0.545801	1	1
biological_process	GO:0009966	regulation of signal transduction	0	4	0	0.973704	0.0390581	1	1
biological_process	GO:0006488	dolichol-linked oligosaccharide biosynthetic process	0	8	0	0.121766	1	1	1
biological_process	GO:0034203	glycolipid translocation	0	1	0	0.768727	1	1	1
biological_process	GO:0006799	polyphosphate biosynthetic process	0	1	0	0.768727	1	1	1
biological_process	GO:0006797	polyphosphate metabolic process	0	1	0	0.768727	1	1	1
biological_process	GO:0002182	cytoplasmic translational elongation	0	1	0	0.514419	0.761548	1	1
biological_process	GO:0022618	ribonucleoprotein complex assembly	0	1	0	0.13508	0.913565	1	1
biological_process	GO:0006168	adenine salvage	0	1	0	0.768727	1	1	1
biological_process	GO:0044209	AMP salvage	0	2	0	0.590909	1	1	1
biological_process	GO:0006501	C-terminal protein lipidation	0	3	0	0.454199	1	1	1
biological_process	GO:0016024	CDP-diacylglycerol biosynthetic process	0	2	0	0.590909	1	1	1
biological_process	GO:0000132	establishment of mitotic spindle orientation	0	2	0	0.590909	1	1	1
biological_process	GO:0051012	microtubule sliding	0	1	0	0.768727	1	1	1
biological_process	GO:0006241	CTP biosynthetic process	0	3	0	0.158459	1	1	1
biological_process	GO:0006228	UTP biosynthetic process	0	2	0	0.590909	1	1	1
biological_process	GO:0005977	glycogen metabolic process	0	4	0	0.0552354	1	1	1
biological_process	GO:0090141	positive regulation of mitochondrial fission	0	1	0	0.768727	1	1	1
biological_process	GO:0031038	myosin II filament organization	0	2	0	0.849013	0.273905	1	1
biological_process	GO:1903610	regulation of calcium-dependent ATPase activity	0	1	0	0.768727	1	1	1
biological_process	GO:1902369	negative regulation of RNA catabolic process	0	1	0	0.864329	0.545801	1	1
biological_process	GO:0009083	branched-chain amino acid catabolic process	0	2	0	0.349099	1	1	1
biological_process	GO:0051693	actin filament capping	0	1	0	0.0935651	1	1	1
biological_process	GO:0030043	actin filament fragmentation	0	1	0	0.768727	1	1	1
biological_process	GO:0018008	N-terminal peptidyl-glycine N-myristoylation	0	1	0	0.768727	1	1	1
biological_process	GO:0006499	N-terminal protein myristoylation	0	1	0	0.768727	1	1	1
biological_process	GO:0032092	positive regulation of protein binding	0	1	0	0.769497	0.400598	1	1
biological_process	GO:1904749	regulation of protein localization to nucleolus	0	1	0	0.768727	1	1	1
biological_process	GO:0042149	cellular response to glucose starvation	0	4	0	0.349099	1	1	1
biological_process	GO:0042797	tRNA transcription by RNA polymerase III	0	1	0	0.768727	1	1	1
biological_process	GO:0032091	negative regulation of protein binding	0	1	0	0.768727	1	1	1
biological_process	GO:0009052	pentose-phosphate shunt, non-oxidative branch	0	3	0	0.454199	1	1	1
biological_process	GO:0050999	regulation of nitric-oxide synthase activity	0	1	0	0.768727	1	1	1
biological_process	GO:0019216	regulation of lipid metabolic process	0	1	0	0.58237	0.711372	1	1
biological_process	GO:0042307	positive regulation of protein import into nucleus	0	2	0	0.590909	1	1	1
biological_process	GO:0061909	autophagosome-lysosome fusion	0	1	0	0.768727	1	1	1
biological_process	GO:0036047	peptidyl-lysine demalonylation	0	1	0	0.768727	1	1	1
biological_process	GO:0036049	peptidyl-lysine desuccinylation	0	1	0	0.768727	1	1	1
biological_process	GO:0061698	protein deglutarylation	0	1	0	0.768727	1	1	1
biological_process	GO:0019752	carboxylic acid metabolic process	0	6	0	0.000633283	0.999612	0.143	1
biological_process	GO:0097328	response to carboplatin	0	1	0	0.768727	1	1	1
biological_process	GO:0030149	sphingolipid catabolic process	0	1	0	0.238452	0.944765	1	1
biological_process	GO:0032880	regulation of protein localization	0	1	0	0.0723034	0.981485	1	1
biological_process	GO:0019878	lysine biosynthetic process via aminoadipic acid	0	3	0	0.454199	1	1	1
biological_process	GO:0034553	mitochondrial respiratory chain complex II assembly	0	4	0	0.349099	1	1	1
biological_process	GO:0018293	protein-FAD linkage	0	1	0	0.768727	1	1	1
biological_process	GO:0010133	proline catabolic process to glutamate	0	2	0	0.590909	1	1	1
biological_process	GO:0080129	proteasome core complex assembly	0	1	0	0.768727	1	1	1
biological_process	GO:0070179	D-serine biosynthetic process	0	1	0	0.768727	1	1	1
biological_process	GO:0036088	D-serine catabolic process	0	2	0	0.590909	1	1	1
biological_process	GO:0006563	L-serine metabolic process	0	1	0	0.288628	0.928109	1	1
biological_process	GO:0018249	protein dehydration	0	1	0	0.768727	1	1	1
biological_process	GO:0042866	pyruvate biosynthetic process	0	1	0	0.768727	1	1	1
biological_process	GO:0097056	selenocysteinyl-tRNA(Sec) biosynthetic process	0	2	0	0.590909	1	1	1
biological_process	GO:0098743	cell aggregation	0	1	0	0.590909	1	1	1
biological_process	GO:0046327	glycerol biosynthetic process from pyruvate	0	1	0	0.768727	1	1	1
biological_process	GO:0019543	propionate catabolic process	0	1	0	0.768727	1	1	1
biological_process	GO:0033993	response to lipid	0	1	0	0.672278	0.731695	1	1
biological_process	GO:0006561	proline biosynthetic process	0	1	0	0.864329	0.545801	1	1
biological_process	GO:0034220	ion transmembrane transport	0	1	0	0.00173947	0.999389	0.354	1
biological_process	GO:0120029	proton export across plasma membrane	0	1	0	0.768727	1	1	1
biological_process	GO:0034355	NAD salvage	0	1	0	0.768727	1	1	1
biological_process	GO:0044210	'de novo' CTP biosynthetic process	0	1	0	0.768727	1	1	1
biological_process	GO:0019856	pyrimidine nucleobase biosynthetic process	0	2	0	0.672278	0.731695	1	1
biological_process	GO:0001188	RNA polymerase I preinitiation complex assembly	0	1	0	0.768727	1	1	1
biological_process	GO:0006362	transcription elongation from RNA polymerase I promoter	0	1	0	0.768727	1	1	1
biological_process	GO:0010923	negative regulation of phosphatase activity	0	1	0	0.590909	1	1	1
biological_process	GO:0009615	response to virus	0	1	0	0.590909	1	1	1
biological_process	GO:0046950	cellular ketone body metabolic process	0	1	0	0.590909	1	1	1
biological_process	GO:0046952	ketone body catabolic process	0	1	0	0.768727	1	1	1
biological_process	GO:0000349	generation of catalytic spliceosome for first transesterification step	0	2	0	0.590909	1	1	1
biological_process	GO:0006186	dGDP phosphorylation	0	1	0	0.768727	1	1	1
biological_process	GO:0006187	dGTP biosynthetic process from dGDP	0	1	0	0.768727	1	1	1
biological_process	GO:0007584	response to nutrient	0	1	0	0.888559	0.209947	1	1
biological_process	GO:0009968	negative regulation of signal transduction	0	1	0	0.775417	0.339436	1	1
biological_process	GO:0045039	protein insertion into mitochondrial inner membrane	0	4	0	0.349099	1	1	1
biological_process	GO:0016320	endoplasmic reticulum membrane fusion	0	1	0	0.768727	1	1	1
biological_process	GO:0006104	succinyl-CoA metabolic process	0	3	0	0.454199	1	1	1
biological_process	GO:0009097	isoleucine biosynthetic process	0	2	0	0.590909	1	1	1
biological_process	GO:0006434	seryl-tRNA aminoacylation	0	2	0	0.590909	1	1	1
biological_process	GO:0006425	glutaminyl-tRNA aminoacylation	0	1	0	0.768727	1	1	1
biological_process	GO:0000372	Group I intron splicing	0	1	0	0.768727	1	1	1
biological_process	GO:0051262	protein tetramerization	0	1	0	0.454199	1	1	1
biological_process	GO:0046084	adenine biosynthetic process	0	2	0	0.454199	1	1	1
biological_process	GO:0000469	cleavage involved in rRNA processing	0	2	0	0.249193	0.89534	1	1
biological_process	GO:0006105	succinate metabolic process	0	1	0	0.768727	1	1	1
biological_process	GO:0016260	selenocysteine biosynthetic process	0	1	0	0.768727	1	1	1
biological_process	GO:0051600	regulation of endocytosis by exocyst localization	0	2	0	0.590909	1	1	1
biological_process	GO:0006564	L-serine biosynthetic process	0	4	0	0.349099	1	1	1
biological_process	GO:0009070	serine family amino acid biosynthetic process	0	2	0	0.0326008	1	1	1
biological_process	GO:0090073	positive regulation of protein homodimerization activity	0	1	0	0.768727	1	1	1
biological_process	GO:0010469	regulation of signaling receptor activity	0	1	0	0.806672	0.354209	1	1
biological_process	GO:0000291	nuclear-transcribed mRNA catabolic process, exonucleolytic	0	1	0	0.890006	0.253262	1	1
biological_process	GO:0060213	positive regulation of nuclear-transcribed mRNA poly(A) tail shortening	0	1	0	0.768727	1	1	1
biological_process	GO:0000183	rDNA heterochromatin assembly	0	1	0	0.768727	1	1	1
biological_process	GO:0032959	inositol trisphosphate biosynthetic process	0	1	0	0.768727	1	1	1
biological_process	GO:0050922	negative regulation of chemotaxis	0	2	0	0.349099	1	1	1
biological_process	GO:0006438	valyl-tRNA aminoacylation	0	2	0	0.590909	1	1	1
biological_process	GO:0006436	tryptophanyl-tRNA aminoacylation	0	2	0	0.590909	1	1	1
biological_process	GO:0000212	meiotic spindle organization	0	1	0	0.768727	1	1	1
biological_process	GO:0030497	fatty acid elongation	0	3	0	0.0718915	1	1	1
biological_process	GO:0042038	peptidyl-histidine methylation, to form tele-methylhistidine	0	1	0	0.768727	1	1	1
biological_process	GO:0018026	peptidyl-lysine monomethylation	0	8	0	0.121766	1	1	1
biological_process	GO:0006432	phenylalanyl-tRNA aminoacylation	0	3	0	0.454199	1	1	1
biological_process	GO:0044208	'de novo' AMP biosynthetic process	0	2	0	0.590909	1	1	1
biological_process	GO:0072334	UDP-galactose transmembrane transport	0	1	0	0.768727	1	1	1
biological_process	GO:0042559	pteridine-containing compound biosynthetic process	0	1	0	0.238452	0.944765	1	1
biological_process	GO:0006424	glutamyl-tRNA aminoacylation	0	2	0	0.590909	1	1	1
biological_process	GO:0034247	snoRNA splicing	0	1	0	0.768727	1	1	1
biological_process	GO:0031247	actin rod assembly	0	1	0	0.768727	1	1	1
biological_process	GO:0030259	lipid glycosylation	0	3	0	0.454199	1	1	1
biological_process	GO:0000453	enzyme-directed rRNA 2'-O-methylation	0	1	0	0.768727	1	1	1
biological_process	GO:0002128	tRNA nucleoside ribose methylation	0	1	0	0.590909	1	1	1
biological_process	GO:0006418	tRNA aminoacylation for protein translation	0	1	0	0.0727346	0.970716	1	1
biological_process	GO:0060098	membrane reorganization involved in phagocytosis, engulfment	0	1	0	0.768727	1	1	1
biological_process	GO:1903241	U2-type prespliceosome assembly	0	1	0	0.768727	1	1	1
biological_process	GO:1901261	regulation of sorocarp spore cell differentiation	0	6	0	0.926592	0.141671	1	1
biological_process	GO:0043001	Golgi to plasma membrane protein transport	0	3	0	0.454199	1	1	1
biological_process	GO:0034067	protein localization to Golgi apparatus	0	1	0	0.974626	0.0813094	1	1
biological_process	GO:2001256	regulation of store-operated calcium entry	0	1	0	0.768727	1	1	1
biological_process	GO:0051289	protein homotetramerization	0	1	0	0.768727	1	1	1
biological_process	GO:0034477	U6 snRNA 3'-end processing	0	1	0	0.768727	1	1	1
biological_process	GO:0045899	positive regulation of RNA polymerase II transcription preinitiation complex assembly	0	1	0	0.768727	1	1	1
biological_process	GO:1902975	mitotic DNA replication initiation	0	5	0	0.268305	1	1	1
biological_process	GO:0000270	peptidoglycan metabolic process	0	1	0	0.130843	0.974956	1	1
biological_process	GO:0003400	regulation of COPII vesicle coating	0	3	0	0.454199	1	1	1
biological_process	GO:0070873	regulation of glycogen metabolic process	0	2	0	0.590909	1	1	1
biological_process	GO:0009750	response to fructose	0	3	0	0.454199	1	1	1
biological_process	GO:0009749	response to glucose	0	2	0	0.158459	1	1	1
biological_process	GO:0032868	response to insulin	0	2	0	0.590909	1	1	1
biological_process	GO:0009744	response to sucrose	0	2	0	0.590909	1	1	1
biological_process	GO:0010043	response to zinc ion	0	3	0	0.454199	1	1	1
biological_process	GO:0006617	SRP-dependent cotranslational protein targeting to membrane, signal sequence recognition	0	1	0	0.768727	1	1	1
biological_process	GO:0071569	protein ufmylation	0	1	0	0.769499	0.650901	1	1
biological_process	GO:0006011	UDP-glucose metabolic process	0	2	0	0.590909	1	1	1
biological_process	GO:0044211	CTP salvage	0	4	0	0.349099	1	1	1
biological_process	GO:0006145	purine nucleobase catabolic process	0	3	0	0.578838	0.793802	1	1
biological_process	GO:0019628	urate catabolic process	0	1	0	0.768727	1	1	1
biological_process	GO:0006648	dihydrosphingosine-1-P pathway	0	2	0	0.590909	1	1	1
biological_process	GO:0042762	regulation of sulfur metabolic process	0	1	0	0.768727	1	1	1
biological_process	GO:0070221	sulfide oxidation, using sulfide:quinone oxidoreductase	0	1	0	0.768727	1	1	1
biological_process	GO:0071468	cellular response to acidic pH	0	1	0	0.590909	1	1	1
biological_process	GO:0072755	cellular response to benomyl	0	2	0	0.590909	1	1	1
biological_process	GO:0070301	cellular response to hydrogen peroxide	0	2	0	0.976382	0.0866127	1	1
biological_process	GO:0060548	negative regulation of cell death	0	1	0	0.915332	0.327722	1	1
biological_process	GO:0019287	isopentenyl diphosphate biosynthetic process, mevalonate pathway	0	3	0	0.454199	1	1	1
biological_process	GO:0019679	propionate metabolic process, methylcitrate cycle	0	3	0	0.454199	1	1	1
biological_process	GO:0034968	histone lysine methylation	0	11	0	0.399828	0.784281	1	1
biological_process	GO:0009372	quorum sensing	0	2	0	0.590909	1	1	1
biological_process	GO:0010212	response to ionizing radiation	0	1	0	0.859156	0.421162	1	1
biological_process	GO:1902635	1-phosphatidyl-1D-myo-inositol 4,5-bisphosphate biosynthetic process	0	1	0	0.768727	1	1	1
biological_process	GO:0035352	NAD transmembrane transport	0	1	0	0.768727	1	1	1
biological_process	GO:0070682	proteasome regulatory particle assembly	0	1	0	0.768727	1	1	1
biological_process	GO:0051607	defense response to virus	0	1	0	0.768727	1	1	1
biological_process	GO:0006203	dGTP catabolic process	0	1	0	0.768727	1	1	1
biological_process	GO:0006662	glycerol ether metabolic process	0	3	0	0.268305	1	1	1
biological_process	GO:1901006	ubiquinone-6 biosynthetic process	0	1	0	0.768727	1	1	1
biological_process	GO:0110051	metabolite repair	0	1	0	0.768727	1	1	1
biological_process	GO:0046496	nicotinamide nucleotide metabolic process	0	1	0	0.238452	0.944765	1	1
biological_process	GO:0031340	positive regulation of vesicle fusion	0	2	0	0.590909	1	1	1
biological_process	GO:0006294	nucleotide-excision repair, preincision complex assembly	0	1	0	0.768727	1	1	1
biological_process	GO:0006231	dTMP biosynthetic process	0	1	0	0.768727	1	1	1
biological_process	GO:0019521	D-gluconate metabolic process	0	1	0	0.454199	1	1	1
biological_process	GO:0000479	endonucleolytic cleavage of tricistronic rRNA transcript (SSU-rRNA, 5.8S rRNA, LSU-rRNA)	0	3	0	0.514419	0.761548	1	1
biological_process	GO:0006409	tRNA export from nucleus	0	2	0	0.590909	1	1	1
biological_process	GO:0071528	tRNA re-export from nucleus	0	1	0	0.768727	1	1	1
biological_process	GO:0090090	negative regulation of canonical Wnt signaling pathway	0	4	0	0.349099	1	1	1
biological_process	GO:0018230	peptidyl-L-cysteine S-palmitoylation	0	12	0	0.042436	1	1	1
biological_process	GO:0006612	protein targeting to membrane	0	14	0	0.0348576	0.990173	1	1
biological_process	GO:0043518	negative regulation of DNA damage response, signal transduction by p53 class mediator	0	1	0	0.768727	1	1	1
biological_process	GO:0006882	cellular zinc ion homeostasis	0	1	0	0.768727	1	1	1
biological_process	GO:0071577	zinc ion transmembrane transport	0	9	0	0.0935651	1	1	1
biological_process	GO:0033674	positive regulation of kinase activity	0	3	0	0.330701	0.809087	1	1
biological_process	GO:0042659	regulation of cell fate specification	0	2	0	0.590909	1	1	1
biological_process	GO:0042989	sequestering of actin monomers	0	11	0	0.0552354	1	1	1
biological_process	GO:0019442	tryptophan catabolic process to acetyl-CoA	0	1	0	0.768727	1	1	1
biological_process	GO:0019441	tryptophan catabolic process to kynurenine	0	3	0	0.454199	1	1	1
biological_process	GO:0006014	D-ribose metabolic process	0	1	0	0.590909	1	1	1
biological_process	GO:0110014	negative regulation of aggregation involved in sorocarp development	0	1	0	0.768727	1	1	1
biological_process	GO:1904007	positive regulation of phospholipase D activity	0	1	0	0.768727	1	1	1
biological_process	GO:0018345	protein palmitoylation	0	5	0	0.0113493	1	0.949	1
biological_process	GO:0018364	peptidyl-glutamine methylation	0	1	0	0.454199	1	1	1
biological_process	GO:0008152	metabolic process	0	2	0	4.02969e-12	1	0	1
biological_process	GO:0016574	histone ubiquitination	0	1	0	0.864329	0.545801	1	1
biological_process	GO:0043162	ubiquitin-dependent protein catabolic process via the multivesicular body sorting pathway	0	1	0	0.578838	0.793802	1	1
biological_process	GO:1902983	DNA strand elongation involved in mitotic DNA replication	0	1	0	0.768727	1	1	1
biological_process	GO:0030071	regulation of mitotic metaphase/anaphase transition	0	2	0	0.819886	0.354685	1	1
biological_process	GO:0032049	cardiolipin biosynthetic process	0	2	0	0.590909	1	1	1
biological_process	GO:0036010	protein localization to endosome	0	1	0	0.768727	1	1	1
biological_process	GO:0051103	DNA ligation involved in DNA repair	0	2	0	0.454199	1	1	1
biological_process	GO:0051351	positive regulation of ligase activity	0	1	0	0.590909	1	1	1
biological_process	GO:0006624	vacuolar protein processing	0	1	0	0.768727	1	1	1
biological_process	GO:0030974	thiamine pyrophosphate transmembrane transport	0	1	0	0.768727	1	1	1
biological_process	GO:0030007	cellular potassium ion homeostasis	0	3	0	0.454199	1	1	1
biological_process	GO:1990573	potassium ion import across plasma membrane	0	3	0	0.454199	1	1	1
biological_process	GO:0005993	trehalose catabolic process	0	1	0	0.768727	1	1	1
biological_process	GO:0016242	negative regulation of macroautophagy	0	1	0	0.768727	1	1	1
biological_process	GO:0038202	TORC1 signaling	0	2	0	0.942021	0.181949	1	1
biological_process	GO:0045724	positive regulation of cilium assembly	0	1	0	0.768727	1	1	1
biological_process	GO:1903566	positive regulation of protein localization to cilium	0	1	0	0.768727	1	1	1
biological_process	GO:1901255	nucleotide-excision repair involved in interstrand cross-link repair	0	1	0	0.768727	1	1	1
biological_process	GO:1903894	regulation of IRE1-mediated unfolded protein response	0	1	0	0.768727	1	1	1
biological_process	GO:0006507	GPI anchor release	0	1	0	0.768727	1	1	1
biological_process	GO:0046086	adenosine biosynthetic process	0	1	0	0.768727	1	1	1
biological_process	GO:0046040	IMP metabolic process	0	1	0	0.288628	0.928109	1	1
biological_process	GO:0019478	D-amino acid catabolic process	0	2	0	0.349099	1	1	1
biological_process	GO:0035329	hippo signaling	0	1	0	0.946544	0.409091	1	1
biological_process	GO:0051781	positive regulation of cell division	0	1	0	0.769499	0.650901	1	1
biological_process	GO:1903438	positive regulation of mitotic cytokinetic process	0	1	0	0.768727	1	1	1
biological_process	GO:0031273	negative regulation of pseudopodium assembly	0	1	0	0.768727	1	1	1
biological_process	GO:0016559	peroxisome fission	0	3	0	0.454199	1	1	1
biological_process	GO:0044375	regulation of peroxisome size	0	2	0	0.590909	1	1	1
biological_process	GO:0106004	tRNA (guanine-N7)-methylation	0	1	0	0.768727	1	1	1
biological_process	GO:0000056	ribosomal small subunit export from nucleus	0	4	0	0.349099	1	1	1
biological_process	GO:1900208	regulation of cardiolipin metabolic process	0	1	0	0.768727	1	1	1
biological_process	GO:0046166	glyceraldehyde-3-phosphate biosynthetic process	0	1	0	0.768727	1	1	1
biological_process	GO:1903014	cellular response to differentiation-inducing factor 1	0	1	0	0.768727	1	1	1
biological_process	GO:0140509	epithelium-like organization	0	3	0	0.454199	1	1	1
biological_process	GO:0061245	establishment or maintenance of bipolar cell polarity	0	2	0	0.590909	1	1	1
biological_process	GO:0070901	mitochondrial tRNA methylation	0	1	0	0.768727	1	1	1
biological_process	GO:0002939	tRNA N1-guanine methylation	0	2	0	0.590909	1	1	1
biological_process	GO:0006222	UMP biosynthetic process	0	1	0	0.415309	0.878234	1	1
biological_process	GO:0018209	peptidyl-serine modification	0	1	0	0.988414	0.0260325	1	1
biological_process	GO:0016480	negative regulation of transcription by RNA polymerase III	0	1	0	0.768727	1	1	1
biological_process	GO:0097510	base-excision repair, AP site formation via deaminated base removal	0	2	0	0.590909	1	1	1
biological_process	GO:0010815	bradykinin catabolic process	0	1	0	0.768727	1	1	1
biological_process	GO:0009225	nucleotide-sugar metabolic process	0	2	0	0.0561056	0.991283	1	1
biological_process	GO:0043086	negative regulation of catalytic activity	0	2	0	0.956778	0.0891574	1	1
biological_process	GO:0140025	contractile vacuole tethering involved in discharge	0	1	0	0.768727	1	1	1
biological_process	GO:1901610	positive regulation of vesicle transport along microtubule	0	1	0	0.768727	1	1	1
biological_process	GO:0007231	osmosensory signaling pathway	0	2	0	0.864329	0.545801	1	1
biological_process	GO:0017186	peptidyl-pyroglutamic acid biosynthetic process, using glutaminyl-peptide cyclotransferase	0	1	0	0.768727	1	1	1
biological_process	GO:0000054	ribosomal subunit export from nucleus	0	5	0	0.0250437	1	0.999	1
biological_process	GO:0101030	tRNA-guanine transglycosylation	0	4	0	0.349099	1	1	1
biological_process	GO:0019303	D-ribose catabolic process	0	1	0	0.768727	1	1	1
biological_process	GO:0000707	meiotic DNA recombinase assembly	0	1	0	0.768727	1	1	1
biological_process	GO:0042148	strand invasion	0	4	0	0.268305	1	1	1
biological_process	GO:0006152	purine nucleoside catabolic process	0	2	0	0.349099	1	1	1
biological_process	GO:0006218	uridine catabolic process	0	3	0	0.454199	1	1	1
biological_process	GO:0009693	ethylene biosynthetic process	0	1	0	0.768727	1	1	1
biological_process	GO:2001295	malonyl-CoA biosynthetic process	0	1	0	0.768727	1	1	1
biological_process	GO:0006101	citrate metabolic process	0	2	0	0.590909	1	1	1
biological_process	GO:0009698	phenylpropanoid metabolic process	0	3	0	0.454199	1	1	1
biological_process	GO:0045947	negative regulation of translational initiation	0	1	0	0.768727	1	1	1
biological_process	GO:0015866	ADP transport	0	1	0	0.768727	1	1	1
biological_process	GO:0015867	ATP transport	0	1	0	0.768727	1	1	1
biological_process	GO:0140021	mitochondrial ADP transmembrane transport	0	1	0	0.768727	1	1	1
biological_process	GO:1990544	mitochondrial ATP transmembrane transport	0	1	0	0.768727	1	1	1
biological_process	GO:0006490	oligosaccharide-lipid intermediate biosynthetic process	0	4	0	0.0552354	1	1	1
biological_process	GO:0033577	protein glycosylation in endoplasmic reticulum	0	1	0	0.768727	1	1	1
biological_process	GO:0033396	beta-alanine biosynthetic process via 3-ureidopropionate	0	1	0	0.768727	1	1	1
biological_process	GO:0006754	ATP biosynthetic process	0	1	0	0.042436	1	1	1
biological_process	GO:0070525	tRNA threonylcarbamoyladenosine metabolic process	0	2	0	0.492631	0.841541	1	1
biological_process	GO:0006216	cytidine catabolic process	0	1	0	0.768727	1	1	1
biological_process	GO:0009972	cytidine deamination	0	1	0	0.768727	1	1	1
biological_process	GO:0006217	deoxycytidine catabolic process	0	1	0	0.768727	1	1	1
biological_process	GO:0071398	cellular response to fatty acid	0	1	0	0.768727	1	1	1
biological_process	GO:0046339	diacylglycerol metabolic process	0	1	0	0.590909	1	1	1
biological_process	GO:0046834	lipid phosphorylation	0	1	0	0.768727	1	1	1
biological_process	GO:0006654	phosphatidic acid biosynthetic process	0	3	0	0.454199	1	1	1
biological_process	GO:0007205	protein kinase C-activating G protein-coupled receptor signaling pathway	0	1	0	0.768727	1	1	1
biological_process	GO:0050926	regulation of positive chemotaxis	0	1	0	0.290162	0.893668	1	1
biological_process	GO:0006546	glycine catabolic process	0	1	0	0.0935651	1	1	1
biological_process	GO:0006550	isoleucine catabolic process	0	2	0	0.590909	1	1	1
biological_process	GO:0006180	deoxyguanosine salvage	0	1	0	0.768727	1	1	1
biological_process	GO:0106136	lectin-induced modified bacterial internalization	0	1	0	0.768727	1	1	1
biological_process	GO:0060547	negative regulation of necrotic cell death	0	1	0	0.768727	1	1	1
biological_process	GO:0045048	protein insertion into ER membrane	0	3	0	0.158459	1	1	1
biological_process	GO:0033058	directional locomotion	0	1	0	0.768727	1	1	1
biological_process	GO:0051126	negative regulation of actin nucleation	0	1	0	0.590909	1	1	1
biological_process	GO:1905037	autophagosome organization	0	4	0	0.784746	0.347963	1	1
biological_process	GO:0035891	exit from host cell	0	1	0	0.768727	1	1	1
biological_process	GO:0070265	necrotic cell death	0	1	0	0.590909	1	1	1
biological_process	GO:0043085	positive regulation of catalytic activity	0	3	0	0.792839	0.278314	1	1
biological_process	GO:1901355	response to rapamycin	0	2	0	0.590909	1	1	1
biological_process	GO:0051792	medium-chain fatty acid biosynthetic process	0	2	0	0.590909	1	1	1
biological_process	GO:0051793	medium-chain fatty acid catabolic process	0	2	0	0.590909	1	1	1
biological_process	GO:1903298	negative regulation of hypoxia-induced intrinsic apoptotic signaling pathway	0	1	0	0.768727	1	1	1
biological_process	GO:0070730	cAMP transport	0	1	0	0.768727	1	1	1
biological_process	GO:0033540	fatty acid beta-oxidation using acyl-CoA oxidase	0	9	0	0.0935651	1	1	1
biological_process	GO:0019395	fatty acid oxidation	0	1	0	0.0593859	0.981736	1	1
biological_process	GO:0050665	hydrogen peroxide biosynthetic process	0	1	0	0.768727	1	1	1
biological_process	GO:0006693	prostaglandin metabolic process	0	1	0	0.768727	1	1	1
biological_process	GO:0140493	very long-chain fatty acid beta-oxidation	0	1	0	0.768727	1	1	1
biological_process	GO:0006448	regulation of translational elongation	0	3	0	0.247599	0.913849	1	1
biological_process	GO:0006103	2-oxoglutarate metabolic process	0	4	0	0.578838	0.793802	1	1
biological_process	GO:0006532	aspartate biosynthetic process	0	2	0	0.590909	1	1	1
biological_process	GO:0006533	aspartate catabolic process	0	1	0	0.768727	1	1	1
biological_process	GO:0006531	aspartate metabolic process	0	2	0	0.590909	1	1	1
biological_process	GO:0000256	allantoin catabolic process	0	3	0	0.454199	1	1	1
biological_process	GO:0006314	intron homing	0	4	0	0.349099	1	1	1
biological_process	GO:0045881	positive regulation of sporulation resulting in formation of a cellular spore	0	1	0	0.768727	1	1	1
biological_process	GO:0006069	ethanol oxidation	0	1	0	0.768727	1	1	1
biological_process	GO:0046294	formaldehyde catabolic process	0	2	0	0.590909	1	1	1
biological_process	GO:0007129	homologous chromosome pairing at meiosis	0	2	0	0.454199	1	1	1
biological_process	GO:0000709	meiotic joint molecule formation	0	1	0	0.768727	1	1	1
biological_process	GO:0010774	meiotic strand invasion involved in reciprocal meiotic recombination	0	1	0	0.768727	1	1	1
biological_process	GO:0006539	glutamate catabolic process via 2-oxoglutarate	0	1	0	0.768727	1	1	1
biological_process	GO:0006481	C-terminal protein methylation	0	1	0	0.768727	1	1	1
biological_process	GO:0045901	positive regulation of translational elongation	0	1	0	0.768727	1	1	1
biological_process	GO:0045905	positive regulation of translational termination	0	2	0	0.590909	1	1	1
biological_process	GO:0050992	dimethylallyl diphosphate biosynthetic process	0	1	0	0.768727	1	1	1
biological_process	GO:0009240	isopentenyl diphosphate biosynthetic process	0	2	0	0.268305	1	1	1
biological_process	GO:0070813	hydrogen sulfide metabolic process	0	1	0	0.768727	1	1	1
biological_process	GO:0044778	meiotic DNA integrity checkpoint signaling	0	1	0	0.768727	1	1	1
biological_process	GO:0006473	protein acetylation	0	2	0	0.652037	0.506857	1	1
biological_process	GO:1904812	rRNA acetylation involved in maturation of SSU-rRNA	0	1	0	0.768727	1	1	1
biological_process	GO:0051391	tRNA acetylation	0	1	0	0.768727	1	1	1
biological_process	GO:2000147	positive regulation of cell motility	0	1	0	0.454199	1	1	1
biological_process	GO:0030038	contractile actin filament bundle assembly	0	1	0	0.768727	1	1	1
biological_process	GO:0060328	cytoplasmic actin-based contraction involved in forward cell motility	0	1	0	0.768727	1	1	1
biological_process	GO:0031270	pseudopodium retraction	0	1	0	0.768727	1	1	1
biological_process	GO:0070650	actin filament bundle distribution	0	1	0	0.768727	1	1	1
biological_process	GO:0097230	cell motility in response to potassium ion	0	1	0	0.768727	1	1	1
biological_process	GO:0003365	establishment of cell polarity involved in ameboidal cell migration	0	1	0	0.768727	1	1	1
biological_process	GO:0098719	sodium ion import across plasma membrane	0	2	0	0.590909	1	1	1
biological_process	GO:0006147	guanine catabolic process	0	1	0	0.768727	1	1	1
biological_process	GO:0046098	guanine metabolic process	0	1	0	0.590909	1	1	1
biological_process	GO:0009204	deoxyribonucleoside triphosphate catabolic process	0	1	0	0.454199	1	1	1
biological_process	GO:0009143	nucleoside triphosphate catabolic process	0	1	0	0.454199	1	1	1
biological_process	GO:0006376	mRNA splice site selection	0	1	0	0.672278	0.731695	1	1
biological_process	GO:1902626	assembly of large subunit precursor of preribosome	0	1	0	0.768727	1	1	1
biological_process	GO:0046104	thymidine metabolic process	0	1	0	0.590909	1	1	1
biological_process	GO:0070544	histone H3-K36 demethylation	0	1	0	0.768727	1	1	1
biological_process	GO:0034720	histone H3-K4 demethylation	0	1	0	0.768727	1	1	1
biological_process	GO:0006172	ADP biosynthetic process	0	1	0	0.768727	1	1	1
biological_process	GO:0042173	regulation of sporulation resulting in formation of a cellular spore	0	1	0	0.864329	0.545801	1	1
biological_process	GO:0015936	coenzyme A metabolic process	0	2	0	0.238452	0.944765	1	1
biological_process	GO:0006739	NADP metabolic process	0	2	0	0.160459	0.967399	1	1
biological_process	GO:0015741	fumarate transport	0	1	0	0.768727	1	1	1
biological_process	GO:0015744	succinate transport	0	1	0	0.590909	1	1	1
biological_process	GO:0006878	cellular copper ion homeostasis	0	4	0	0.349099	1	1	1
biological_process	GO:0000454	snoRNA guided rRNA pseudouridine synthesis	0	1	0	0.768727	1	1	1
biological_process	GO:0018160	peptidyl-pyrromethane cofactor linkage	0	1	0	0.768727	1	1	1
biological_process	GO:0019915	lipid storage	0	4	0	0.391666	0.839541	1	1
biological_process	GO:0006784	heme A biosynthetic process	0	2	0	0.590909	1	1	1
biological_process	GO:0048034	heme O biosynthetic process	0	1	0	0.768727	1	1	1
biological_process	GO:0043433	negative regulation of DNA-binding transcription factor activity	0	1	0	0.590909	1	1	1
biological_process	GO:0043065	positive regulation of apoptotic process	0	1	0	0.768727	1	1	1
biological_process	GO:0060765	regulation of androgen receptor signaling pathway	0	1	0	0.768727	1	1	1
biological_process	GO:0044772	mitotic cell cycle phase transition	0	3	0	0.72106	0.408193	1	1
biological_process	GO:1902977	mitotic DNA replication preinitiation complex assembly	0	1	0	0.768727	1	1	1
biological_process	GO:0000731	DNA synthesis involved in DNA repair	0	1	0	0.58237	0.711372	1	1
biological_process	GO:0060151	peroxisome localization	0	1	0	0.768727	1	1	1
biological_process	GO:1904825	protein localization to microtubule plus-end	0	1	0	0.768727	1	1	1
biological_process	GO:0031110	regulation of microtubule polymerization or depolymerization	0	1	0	0.769499	0.650901	1	1
biological_process	GO:0008612	peptidyl-lysine modification to peptidyl-hypusine	0	2	0	0.590909	1	1	1
biological_process	GO:0045736	negative regulation of cyclin-dependent protein serine/threonine kinase activity	0	1	0	0.768727	1	1	1
biological_process	GO:0001666	response to hypoxia	0	2	0	0.349099	1	1	1
biological_process	GO:1904985	negative regulation of quinolinate biosynthetic process	0	1	0	0.768727	1	1	1
biological_process	GO:0019748	secondary metabolic process	0	1	0	0.238452	0.944765	1	1
biological_process	GO:0009051	pentose-phosphate shunt, oxidative branch	0	2	0	0.590909	1	1	1
biological_process	GO:0008652	cellular amino acid biosynthetic process	0	1	0	0.00580546	0.998477	0.756	1
biological_process	GO:1901135	carbohydrate derivative metabolic process	0	1	0	6.35752e-10	1	0	1
biological_process	GO:0045653	negative regulation of megakaryocyte differentiation	0	1	0	0.768727	1	1	1
biological_process	GO:0018195	peptidyl-arginine modification	0	1	0	0.268305	1	1	1
biological_process	GO:0006479	protein methylation	0	1	0	0.0286692	0.989884	0.999	1
biological_process	GO:0090160	Golgi to lysosome transport	0	1	0	0.768727	1	1	1
biological_process	GO:0016598	protein arginylation	0	1	0	0.768727	1	1	1
biological_process	GO:0006306	DNA methylation	0	1	0	0.768727	1	1	1
biological_process	GO:0032776	DNA methylation on cytosine	0	1	0	0.768727	1	1	1
biological_process	GO:0010243	response to organonitrogen compound	0	1	0	0.968452	0.0502536	1	1
biological_process	GO:1901096	regulation of autophagosome maturation	0	1	0	0.768727	1	1	1
biological_process	GO:0080163	regulation of protein serine/threonine phosphatase activity	0	1	0	0.768727	1	1	1
biological_process	GO:0000103	sulfate assimilation	0	2	0	0.590909	1	1	1
biological_process	GO:1990451	cellular stress response to acidic pH	0	1	0	0.768727	1	1	1
biological_process	GO:0071264	positive regulation of translational initiation in response to starvation	0	1	0	0.768727	1	1	1
biological_process	GO:0007266	Rho protein signal transduction	0	2	0	0.769499	0.650901	1	1
biological_process	GO:1990456	mitochondrion-endoplasmic reticulum membrane tethering	0	5	0	0.268305	1	1	1
biological_process	GO:0033386	geranylgeranyl diphosphate biosynthetic process	0	1	0	0.768727	1	1	1
biological_process	GO:0035998	7,8-dihydroneopterin 3'-triphosphate biosynthetic process	0	1	0	0.768727	1	1	1
biological_process	GO:0006399	tRNA metabolic process	0	1	0	0.000145351	0.99994	0.035	1
biological_process	GO:0030836	positive regulation of actin filament depolymerization	0	1	0	0.864329	0.545801	1	1
biological_process	GO:0034315	regulation of Arp2/3 complex-mediated actin nucleation	0	1	0	0.769499	0.650901	1	1
biological_process	GO:1903615	positive regulation of protein tyrosine phosphatase activity	0	1	0	0.768727	1	1	1
biological_process	GO:0019348	dolichol metabolic process	0	2	0	0.349099	1	1	1
biological_process	GO:0006154	adenosine catabolic process	0	2	0	0.590909	1	1	1
biological_process	GO:0046103	inosine biosynthetic process	0	2	0	0.590909	1	1	1
biological_process	GO:0035513	oxidative RNA demethylation	0	1	0	0.768727	1	1	1
biological_process	GO:0035552	oxidative single-stranded DNA demethylation	0	1	0	0.768727	1	1	1
biological_process	GO:0034969	histone arginine methylation	0	1	0	0.454199	1	1	1
biological_process	GO:1903292	protein localization to Golgi membrane	0	3	0	0.454199	1	1	1
biological_process	GO:0000082	G1/S transition of mitotic cell cycle	0	3	0	0.653075	0.652623	1	1
biological_process	GO:0030842	regulation of intermediate filament depolymerization	0	1	0	0.768727	1	1	1
biological_process	GO:0032366	intracellular sterol transport	0	1	0	0.590909	1	1	1
biological_process	GO:0097036	regulation of plasma membrane sterol distribution	0	1	0	0.768727	1	1	1
biological_process	GO:0000128	flocculation	0	1	0	0.768727	1	1	1
biological_process	GO:0045087	innate immune response	0	1	0	0.768727	1	1	1
biological_process	GO:0010387	COP9 signalosome assembly	0	1	0	0.768727	1	1	1
biological_process	GO:0034088	maintenance of mitotic sister chromatid cohesion	0	3	0	0.454199	1	1	1
biological_process	GO:0051443	positive regulation of ubiquitin-protein transferase activity	0	3	0	0.454199	1	1	1
biological_process	GO:0016104	triterpenoid biosynthetic process	0	1	0	0.768727	1	1	1
biological_process	GO:0106046	guanine deglycation, glyoxal removal	0	2	0	0.590909	1	1	1
biological_process	GO:0036529	protein deglycation, glyoxal removal	0	2	0	0.590909	1	1	1
biological_process	GO:0035268	protein mannosylation	0	1	0	0.268305	1	1	1
biological_process	GO:0006542	glutamine biosynthetic process	0	1	0	0.768727	1	1	1
biological_process	GO:0006083	acetate metabolic process	0	1	0	0.864329	0.545801	1	1
biological_process	GO:0046874	quinolinate metabolic process	0	1	0	0.268305	1	1	1
biological_process	GO:0033986	response to methanol	0	1	0	0.768727	1	1	1
biological_process	GO:0006081	cellular aldehyde metabolic process	0	2	0	0.00669424	1	0.833	1
biological_process	GO:0006335	DNA replication-dependent chromatin assembly	0	4	0	0.349099	1	1	1
biological_process	GO:0006592	ornithine biosynthetic process	0	1	0	0.768727	1	1	1
biological_process	GO:0046898	response to cycloheximide	0	1	0	0.768727	1	1	1
biological_process	GO:0019483	beta-alanine biosynthetic process	0	1	0	0.590909	1	1	1
biological_process	GO:0006214	thymidine catabolic process	0	1	0	0.768727	1	1	1
biological_process	GO:0006212	uracil catabolic process	0	1	0	0.768727	1	1	1
biological_process	GO:0006146	adenine catabolic process	0	1	0	0.768727	1	1	1
biological_process	GO:0043103	hypoxanthine salvage	0	1	0	0.768727	1	1	1
biological_process	GO:0006288	base-excision repair, DNA ligation	0	1	0	0.768727	1	1	1
biological_process	GO:0097681	double-strand break repair via alternative nonhomologous end joining	0	5	0	0.268305	1	1	1
biological_process	GO:0043504	mitochondrial DNA repair	0	2	0	0.590909	1	1	1
biological_process	GO:0071474	cellular hyperosmotic response	0	2	0	0.590909	1	1	1
biological_process	GO:1990120	messenger ribonucleoprotein complex assembly	0	1	0	0.768727	1	1	1
biological_process	GO:0110104	mRNA alternative polyadenylation	0	1	0	0.768727	1	1	1
biological_process	GO:0031439	positive regulation of mRNA cleavage	0	1	0	0.768727	1	1	1
biological_process	GO:1900365	positive regulation of mRNA polyadenylation	0	1	0	0.768727	1	1	1
biological_process	GO:0051290	protein heterotetramerization	0	1	0	0.768727	1	1	1
biological_process	GO:0071704	organic substance metabolic process	0	1	0	7.60371e-09	1	0	1
biological_process	GO:0009259	ribonucleotide metabolic process	0	1	0	0.0113445	0.994438	0.943	1
biological_process	GO:0036065	fucosylation	0	10	0	0.160459	0.967399	1	1
biological_process	GO:0000455	enzyme-directed rRNA pseudouridine synthesis	0	5	0	0.268305	1	1	1
biological_process	GO:0019988	charged-tRNA amino acid modification	0	1	0	0.590909	1	1	1
biological_process	GO:0010499	proteasomal ubiquitin-independent protein catabolic process	0	1	0	0.768727	1	1	1
biological_process	GO:0048254	snoRNA localization	0	2	0	0.590909	1	1	1
biological_process	GO:0006883	cellular sodium ion homeostasis	0	2	0	0.590909	1	1	1
biological_process	GO:0036376	sodium ion export across plasma membrane	0	2	0	0.590909	1	1	1
[truncated: 2,822 more rows]
[truncated: 337 more columns]

## Sheet: polyQ
GO domain	GO ID	GO term	polyQ protein	total number	number / total	raw p-value under-representation	raw p-value over-representation	FWER under-representation	FWER over-representation	Gene Name
biological_process	GO:0006357	regulation of transcription by RNA polymerase II	91	126	0.722222	1	2.64762e-27	1	0	BZPN_DICDI	BZPM_DICDI	STATC_DICDI	MED12_DICDI	BZPS_DICDI	BZPC_DICDI	HBX12_DICDI	MED13_DICDI	MED14_DICDI	MED18_DICDI	BZPQ_DICDI	BZPR_DICDI	DIMA_DICDI	BZPD_DICDI	BZPI_DICDI	GBF_DICDI	BZPP_DICDI	MED23_DICDI	HBX3_DICDI	MED31_DICDI	ELP4_DICDI	MED27_DICDI	MED26_DICDI	MED7_DICDI	BZPK_DICDI	MED21_DICDI	MED1_DICDI	BZPO_DICDI	STATB_DICDI	SRFA_DICDI	SRFB_DICDI	SRFC_DICDI	STATA_DICDI	MED4_DICDI	Y5837_DICDI	Y2556_DICDI	MED17_DICDI	Y0777_DICDI	DIMB_DICDI	HIRA_DICDI
biological_process	GO:0007165	signal transduction	89	165	0.539394	1	2.15058e-20	1	0	PHG2_DICDI	PDE3_DICDI	PDE4_DICDI	PDE5_DICDI	PKD1_DICDI	TAGB_DICDI	TIRA_DICDI	SPLA_DICDI	GACI_DICDI	MGP1_DICDI	GACH_DICDI	GACM_DICDI	GAPA_DICDI	LIMKA_DICDI	GACT_DICDI	GACII_DICDI	KXCB_DICDI	KXCA_DICDI	GACJ_DICDI	KINX_DICDI	GACY_DICDI	GACZ_DICDI	GACG_DICDI	GACE_DICDI	EXOC2_DICDI	GACGG_DICDI	CPAS2_DICDI	GACU_DICDI	GACFF_DICDI	GACF_DICDI	PSRA_DICDI	ROCO9_DICDI	PYK3_DICDI	PK4_DICDI	ROCO8_DICDI	ROC11_DICDI	ROCO6_DICDI	ROCO7_DICDI	MGP4_DICDI	SPKA_DICDI
biological_process	GO:0006355	regulation of transcription, DNA-templated	48	87	0.551724	1	6.32192e-37	1	0	GTAE_DICDI	GTAK_DICDI	GTAP_DICDI	GTAA_DICDI	GTAG_DICDI	GTAJ_DICDI	GTAT_DICDI	GTAI_DICDI	GTAF_DICDI	TRA1_DICDI	SRFB_DICDI	WRKY1_DICDI	Y9041_DICDI	PFD5_DICDI	Y8013_DICDI	Y4797_DICDI	Y3800_DICDI	Y0170_DICDI	ARP8_DICDI	MYBAA_DICDI	MYBB_DICDI	MYBM_DICDI	MYBQ_DICDI	NFX1_DICDI	NFYA_DICDI	GTAY_DICDI	GTAL_DICDI	NFYB_DICDI	NFYC_DICDI	KAPC_DICDI	EAF3_DICDI	AAC2_DICDI	Q75JH1_DICDI	Q550R6_DICDI	Q86A78_DICDI	Q54Y92_DICDI	Q54BU8_DICDI	Q54WI7_DICDI	Q54TZ5_DICDI	Q55F76_DICDI
biological_process	GO:0006468	protein phosphorylation	47	77	0.61039	1	5.05526e-09	1	0	PHG2_DICDI	PK2_DICDI	PAKB_DICDI	STK11_DICDI	IFKA_DICDI	MP2K1_DICDI	MYLKE_DICDI	MHCKC_DICDI	DHKA_DICDI	KC1_DICDI	MRKB_DICDI	PAKA_DICDI	PYK3_DICDI	PAKH_DICDI	MHCKD_DICDI	PAKE_DICDI	SEPA_DICDI	PAKD_DICDI	TRA1_DICDI	STK4L_DICDI	YAKA_DICDI	PRKDC_DICDI	Y0111_DICDI	Y6481_DICDI	Y9719_DICDI	Y7165_DICDI	Y2550_DICDI	Y8487_DICDI	Y6461_DICDI	IREA_DICDI	PAKG_DICDI	SVKA_DICDI	Y0010_DICDI	TSUA_DICDI	Y4007_DICDI	Y2354_DICDI	VPS15_DICDI	RCKA_DICDI	ATR1_DICDI	CDK7_DICDI
biological_process	GO:0035556	intracellular signal transduction	46	77	0.597403	1	3.40673e-13	1	0	PDPKA_DICDI	PDPKB_DICDI	PAKB_DICDI	MRKC_DICDI	STK11_DICDI	DCX_DICDI	FORE_DICDI	GXCB_DICDI	MRKA_DICDI	MRKB_DICDI	PAKA_DICDI	PKGA_DICDI	SKY1_DICDI	PAKH_DICDI	PAKD_DICDI	ROCO8_DICDI	STK4L_DICDI	MYLKF_DICDI	PTP3_DICDI	Y8078_DICDI	Y8646_DICDI	Y0701_DICDI	Y9719_DICDI	Y1197_DICDI	Y8013_DICDI	Y0670_DICDI	Y7165_DICDI	Y1558_DICDI	PAKG_DICDI	Y0010_DICDI	Y4613_DICDI	Y9099_DICDI	DGKA_DICDI	NDRB_DICDI	NDRC_DICDI	NDRD_DICDI	DST3_DICDI	ERK1_DICDI	Q54XA7_DICDI	Q54DV1_DICDI
biological_process	GO:0018105	peptidyl-serine phosphorylation	26	40	0.65	0.999999	2.77757e-06	1	0	PDPKA_DICDI	PDPKB_DICDI	PK2_DICDI	PKD1_DICDI	MPS1_DICDI	KC1_DICDI	PKGA_DICDI	PK4_DICDI	MYLKF_DICDI	YAKA_DICDI	Y0701_DICDI	Y8901_DICDI	Y6481_DICDI	Y0444_DICDI	Y0670_DICDI	Y1558_DICDI	Y2354_DICDI	ATG1_DICDI	NDRB_DICDI	NDRC_DICDI	NDRD_DICDI	KAPC_DICDI	CDC7_DICDI	DYRK1_DICDI	Q54WT0_DICDI	Q54WQ2_DICDI
biological_process	GO:0006397	mRNA processing	26	39	0.666667	1	2.03794e-09	1	0	SF3B4_DICDI	DDX6_DICDI	IRLB_DICDI	IRLC_DICDI	IRLE_DICDI	IRLA_DICDI	IRLF_DICDI	PAN3_DICDI	SMN1_DICDI	SPF27_DICDI	PAP1B_DICDI	IREA_DICDI	YME2_DICDI	Q55CS2_DICDI	Q54U58_DICDI	Q54XF1_DICDI	Q54UA7_DICDI	Q55DD5_DICDI	Q55CS4_DICDI	Q54F78_DICDI	Q54LT3_DICDI	Q553T2_DICDI	Q54ZS5_DICDI	Q54YS7_DICDI	Q1ZXG7_DICDI	Q54LG7_DICDI
biological_process	GO:0010468	regulation of gene expression	19	38	0.5	1	6.8704e-42	1	0	MED13_DICDI	CYAD_DICDI	CYC8_DICDI	SRFC_DICDI	STATA_DICDI	YAKA_DICDI	Y7071_DICDI	ATG7_DICDI	Q54HU7_DICDI	Q54JS2_DICDI	Q54RK7_DICDI	Q55E25_DICDI	Q54CF8_DICDI	Q54BA8_DICDI	Q55FS1_DICDI	Q86J15_DICDI	Q54UZ8_DICDI	Q550K3_DICDI	Q95ZG5_DICDI
biological_process	GO:0007049	cell cycle	18	41	0.439024	1	4.39501e-11	1	0	RBLA_DICDI	APC4_DICDI	APC5_DICDI	KIF8_DICDI	CDH1_DICDI	APC2_DICDI	MSH2_DICDI	LIME_DICDI	PMS1_DICDI	MLH1_DICDI	SVKA_DICDI	KIF10_DICDI	ERK1_DICDI	CDC26_DICDI	DNLI3_DICDI	Q86IC7_DICDI	Q54JQ5_DICDI	Q54HI6_DICDI
biological_process	GO:0000278	mitotic cell cycle	13	25	0.52	1	3.52681e-07	1	0	PLK_DICDI	SPC97_DICDI	ICPA_DICDI	KIF4_DICDI	DYHC_DICDI	SPC98_DICDI	Y8646_DICDI	MYBAA_DICDI	MYBQ_DICDI	KIF9_DICDI	DPOE1_DICDI	DCTN2_DICDI	Q54BR8_DICDI
biological_process	GO:0000226	microtubule cytoskeleton organization	12	20	0.6	0.999999	2.59686e-06	1	0	MTAA_DICDI	DC1L1_DICDI	KIF8_DICDI	TBCD_DICDI	TBCE_DICDI	Y6442_DICDI	DYIN_DICDI	Q54XP9_DICDI	Q54VM5_DICDI	Q55BD8_DICDI	Q54RX7_DICDI	Q54PZ3_DICDI
biological_process	GO:0006366	transcription by RNA polymerase II	12	39	0.307692	1	6.09739e-24	1	0	MED18_DICDI	MED29_DICDI	MED19_DICDI	TF2H4_DICDI	MED16_DICDI	MED15_DICDI	Q54VP8_DICDI	Q54DG0_DICDI	Q54Y92_DICDI	Q54LJ4_DICDI	Q54T71_DICDI	Q54KH7_DICDI
biological_process	GO:0045893	positive regulation of transcription, DNA-templated	12	13	0.923077	1	1.08339e-08	1	0	MRFA_DICDI	KU70_DICDI	STATB_DICDI	Y7317_DICDI	Y9218_DICDI	MED16_DICDI	Y3934_DICDI	DYRK1_DICDI	Q1ZXQ2_DICDI	Q54E54_DICDI	Q55CV3_DICDI	Q54JM6_DICDI
biological_process	GO:0010629	negative regulation of gene expression	10	20	0.5	1	1.25057e-06	1	0	STK11_DICDI	STLB_DICDI	PKS1_DICDI	YAKA_DICDI	DIMB_DICDI	KAPC_DICDI	HBX4_DICDI	CAR4_DICDI	B0G164_DICDI	Q54T71_DICDI
biological_process	GO:0007059	chromosome segregation	9	16	0.5625	1	5.98007e-09	1	0	SAMKC_DICDI	ICPA_DICDI	MPS1_DICDI	SMC4_DICDI	NEK2_DICDI	Q54HI8_DICDI	Q54WQ2_DICDI	Q86A08_DICDI	Q54HI6_DICDI
biological_process	GO:0006351	transcription, DNA-templated	7	10	0.7	1	2.35697e-28	1	0	GTAC_DICDI	SCAI_DICDI	Y7891_DICDI	HIRA_DICDI	CRTF_DICDI	Q54XU3_DICDI	Q54LF4_DICDI
biological_process	GO:0016310	phosphorylation	4	9	0.444444	1	4.29284e-07	1	0	CYAD_DICDI	GLPK_DICDI	SPHKA_DICDI	KIME_DICDI
biological_process	GO:0000070	mitotic sister chromatid segregation	4	6	0.666667	1	8.19303e-08	1	0	SMC4_DICDI	SUN1_DICDI	Q54W25_DICDI	Q54ID6_DICDI
biological_process	GO:0051276	chromosome organization	2	3	0.666667	1	1.76952e-13	1	0	Q55C32_DICDI	Q54Z42_DICDI
biological_process	GO:0010467	gene expression	1	5	0.2	1	4.76094e-14	1	0	FORC_DICDI
biological_process	GO:0048285	organelle fission	1	2	0.5	1	3.66995e-09	1	0	FTSZA_DICDI
biological_process	GO:0000280	nuclear division	1	1	1	1	3.90016e-09	1	0	KIF12_DICDI
biological_process	GO:0019438	aromatic compound biosynthetic process	1	8	0.125	1	1.14947e-12	1	0	DMTA_DICDI
biological_process	GO:0006139	nucleobase-containing compound metabolic process	1	2	0.5	1	5.3209e-14	1	0	DAK_DICDI
biological_process	GO:0006996	organelle organization	1	3	0.333333	1	4.92394e-12	1	0	Q552X0_DICDI
biological_process	GO:0080090	regulation of primary metabolic process	1	1	1	1	1.41879e-33	1	0	Q54UG7_DICDI
biological_process	GO:0016070	RNA metabolic process	0	6	0	1	2.36738e-23	1	0
biological_process	GO:0000819	sister chromatid segregation	0	2	0	1	1.34799e-07	1	0
biological_process	GO:0016043	cellular component organization	0	1	0	1	7.95956e-09	1	0
biological_process	GO:0006725	cellular aromatic compound metabolic process	0	1	0	1	1.02036e-10	1	0
biological_process	GO:0046856	phosphatidylinositol dephosphorylation	19	25	0.76	1	3.25165e-06	1	0.001	MTMR_DICDI	PATS1_DICDI	PTEN_DICDI	CNRN_DICDI	Q54TZ3_DICDI	Q54YC2_DICDI	Q553B4_DICDI	Q54C52_DICDI	Q54FY6_DICDI	Q55AZ2_DICDI	Q1ZXD2_DICDI	Q54W40_DICDI	Q54TD5_DICDI	Q55EE1_DICDI	Q55E04_DICDI	Q54PT8_DICDI	Q54PV1_DICDI	Q54D97_DICDI	Q8I7P3_DICDI
biological_process	GO:0051225	spindle assembly	5	5	1	1	5.65627e-06	1	0.001	SPC97_DICDI	GAPA_DICDI	SPC98_DICDI	EB1_DICDI	Q54RJ3_DICDI
biological_process	GO:0007017	microtubule-based process	0	3	0	0.999997	7.74144e-06	1	0.002
biological_process	GO:0048312	intracellular distribution of mitochondria	13	15	0.866667	0.999999	9.9232e-06	1	0.004	DYNA_DICDI	CLU_DICDI	Q75JJ2_DICDI	Q54ZX7_DICDI	Q54XJ7_DICDI	Q54YP3_DICDI	Q54ZA9_DICDI	Q54H31_DICDI	Q54SB7_DICDI	Q54JI4_DICDI	Q54RX8_DICDI	Q54T92_DICDI	Q54KJ2_DICDI
biological_process	GO:0010608	posttranscriptional regulation of gene expression	4	4	1	0.999994	1.48517e-05	1	0.004	Q54GR0_DICDI	Q54IH9_DICDI	Q54WL9_DICDI	Q54WA7_DICDI
biological_process	GO:0018209	peptidyl-serine modification	0	1	0	0.999997	1.06001e-05	1	0.004
biological_process	GO:0048311	mitochondrion distribution	0	1	0	0.999999	1.39125e-05	1	0.004
biological_process	GO:0046488	phosphatidylinositol metabolic process	0	1	0	0.999997	8.79862e-06	1	0.004
biological_process	GO:0006281	DNA repair	36	73	0.493151	0.999987	2.45439e-05	1	0.006	MMS19_DICDI	DOT1L_DICDI	KC1_DICDI	MSH2_DICDI	PRP19_DICDI	SYF1_DICDI	SMC6_DICDI	TRA1_DICDI	PDS5_DICDI	IN80D_DICDI	RAD50_DICDI	RA51D_DICDI	ATR1_DICDI	EAF3_DICDI	Q54D34_DICDI	Q55AZ3_DICDI	Q54GC4_DICDI	Q54G98_DICDI	Q54DM3_DICDI	Q54TE8_DICDI	Q54DG0_DICDI	Q54S30_DICDI	Q554U4_DICDI	Q55FJ4_DICDI	Q1ZXG5_DICDI	Q54I13_DICDI	Q55E62_DICDI	Q54IH7_DICDI	Q54XR0_DICDI	Q54KW8_DICDI	Q54Z42_DICDI	Q869Q1_DICDI	Q54BR4_DICDI	Q86IV6_DICDI	B0G0Y4_DICDI	Q54XE1_DICDI
biological_process	GO:1903013	response to differentiation-inducing factor 1	21	33	0.636364	0.999992	3.58757e-05	1	0.01	PK2_DICDI	STATC_DICDI	PP2BA_DICDI	PHS2_DICDI	MGP1_DICDI	MHCKC_DICDI	DIMA_DICDI	GACG_DICDI	PAKA_DICDI	MHCKD_DICDI	PTP3_DICDI	SPLB_DICDI	Y1806_DICDI	DIMB_DICDI	ABCF4_DICDI	MYOB_DICDI	GEFD_DICDI	GEFE_DICDI	GEFN_DICDI	GEFR_DICDI	ELMOE_DICDI
biological_process	GO:0006974	cellular response to DNA damage stimulus	16	38	0.421053	0.999977	4.04309e-05	1	0.014	MMS19_DICDI	DOT1L_DICDI	FHKC_DICDI	PRKDC_DICDI	XRCC5_DICDI	WRIP1_DICDI	XPF_DICDI	KIN17_DICDI	Q55AZ3_DICDI	Q54KQ4_DICDI	Q550P6_DICDI	Q55F81_DICDI	Q8T145_DICDI	Q54QU4_DICDI	Q54BR4_DICDI	Q54WG5_DICDI
biological_process	GO:0016441	posttranscriptional gene silencing	3	3	1	0.999995	4.50394e-05	1	0.015	Q55DB7_DICDI	Q7KWS3_DICDI	Q54UI6_DICDI
biological_process	GO:0046839	phospholipid dephosphorylation	0	3	0	0.999991	4.64446e-05	1	0.017
biological_process	GO:0007062	sister chromatid cohesion	3	4	0.75	0.999994	4.92045e-05	1	0.019	Q54E85_DICDI	Q54W25_DICDI	Q54QR0_DICDI
biological_process	GO:0006401	RNA catabolic process	2	8	0.25	0.999972	6.9314e-05	1	0.033	Q86IE2_DICDI	Q86K90_DICDI
biological_process	GO:0045944	positive regulation of transcription by RNA polymerase II	23	34	0.676471	0.99998	7.01874e-05	1	0.034	MED10_DICDI	T2FA_DICDI	SRFA_DICDI	MED19_DICDI	SRFB_DICDI	SRFC_DICDI	Y6505_DICDI	CDK7_DICDI	MYBAA_DICDI	MYBQ_DICDI	NC2B_DICDI	Q54LN0_DICDI	Q54L49_DICDI	Q54SJ6_DICDI	Q55C32_DICDI	Q54HQ0_DICDI	Q54JF2_DICDI	Q54C05_DICDI	Q55CM6_DICDI	Q55BD4_DICDI	Q54TZ0_DICDI	Q54NM0_DICDI	Q54K42_DICDI
biological_process	GO:0051726	regulation of cell cycle	5	11	0.454545	0.999969	6.98901e-05	1	0.034	Y6481_DICDI	Q7KWP1_DICDI	C7FZZ4_DICDI	Q54LF4_DICDI	Q75JL4_DICDI
biological_process	GO:0006302	double-strand break repair	10	26	0.384615	0.999967	7.977e-05	1	0.042	KU70_DICDI	PRKDC_DICDI	XRCC5_DICDI	RAD50_DICDI	ARP8_DICDI	Q54B72_DICDI	Q86KT0_DICDI	Q86K74_DICDI	Q54E42_DICDI	Q54S42_DICDI
biological_process	GO:0043087	regulation of GTPase activity	17	34	0.5	0.999962	8.8302e-05	1	0.048	GACI_DICDI	GACH_DICDI	GAPA_DICDI	GACT_DICDI	GACE_DICDI	GACFF_DICDI	Y1806_DICDI	NGAP_DICDI	Q55CR5_DICDI	Q86B03_DICDI	Q86JJ7_DICDI	Q54TK7_DICDI	Q54UJ4_DICDI	Q54Q13_DICDI	Q54F48_DICDI	Q8SSU4_DICDI	Q8I7P3_DICDI
biological_process	GO:0006325	chromatin organization	14	35	0.4	0.999953	9.19401e-05	1	0.049	RBLA_DICDI	BRE1_DICDI	TAF12_DICDI	HDA21_DICDI	HDA22_DICDI	CMT1_DICDI	Q559I7_DICDI	Q54SJ6_DICDI	Q54R05_DICDI	Q55A48_DICDI	Q54FH5_DICDI	Q54QM3_DICDI	Q54JM6_DICDI	Q54KH7_DICDI
biological_process	GO:0007051	spindle organization	1	1	1	0.99998	9.64535e-05	1	0.054	KIF13_DICDI
biological_process	GO:0045892	negative regulation of transcription, DNA-templated	8	15	0.533333	0.999963	0.000107672	1	0.062	STATC_DICDI	STATB_DICDI	STATA_DICDI	ANM2_DICDI	Q54SJ6_DICDI	Q75JW7_DICDI	Q54QA7_DICDI	Q54ZN0_DICDI
biological_process	GO:0035194	post-transcriptional gene silencing by RNA	1	3	0.333333	0.999986	0.000116816	1	0.066	Q86IV6_DICDI
biological_process	GO:0031047	gene silencing by RNA	2	4	0.5	0.999981	0.000123824	1	0.07	NCBP2_DICDI	Q54WH0_DICDI
biological_process	GO:0050790	regulation of catalytic activity	1	11	0.0909091	0.99993	0.000126417	1	0.07	Q54M79_DICDI
biological_process	GO:0097696	receptor signaling pathway via STAT	2	3	0.666667	0.999993	0.000158408	1	0.08	STATA_DICDI	CUDA_DICDI
biological_process	GO:0016311	dephosphorylation	6	15	0.4	0.999917	0.000199625	1	0.094	MPL1_DICDI	PTEN_DICDI	PTP3_DICDI	CNRN_DICDI	Q553B4_DICDI	Q54GT8_DICDI
biological_process	GO:0006464	cellular protein modification process	2	12	0.166667	0.999849	0.00020704	1	0.095	TS101_DICDI	UBC12_DICDI
biological_process	GO:0016579	protein deubiquitination	20	32	0.625	0.999939	0.000223768	1	0.1	UBPB_DICDI	Y4757_DICDI	UCHL5_DICDI	Q54MJ3_DICDI	Q86K41_DICDI	Q55BI4_DICDI	Q54PQ7_DICDI	Q54BB6_DICDI	Q869U4_DICDI	Q556A3_DICDI	Q86J16_DICDI	B0G199_DICDI	Q553T4_DICDI	Q54DT4_DICDI	Q86KB3_DICDI	Q54WV5_DICDI	Q54XH4_DICDI	Q55AP9_DICDI	Q54H96_DICDI	Q55EJ1_DICDI
biological_process	GO:0070646	protein modification by small protein removal	1	2	0.5	0.99993	0.000230548	1	0.103	Q54CK2_DICDI
biological_process	GO:1990414	replication-born double-strand break repair via sister chromatid exchange	7	7	1	1	0.000237241	1	0.13	Q55GF7_DICDI	Q54VK4_DICDI	Q54RK7_DICDI	Q54PY6_DICDI	Q550H7_DICDI	Q54E44_DICDI	Q86J15_DICDI
biological_process	GO:0034087	establishment of mitotic sister chromatid cohesion	6	6	1	1	0.000237241	1	0.13	Q55GF7_DICDI	Q54VK4_DICDI	Q54RK7_DICDI	Q54PY6_DICDI	Q54E44_DICDI	Q86J15_DICDI
biological_process	GO:0007259	receptor signaling pathway via JAK-STAT	4	4	1	1	0.000237241	1	0.13	STATC_DICDI	STATB_DICDI	STATA_DICDI	Q86I20_DICDI
biological_process	GO:0006402	mRNA catabolic process	7	13	0.538462	0.999904	0.000250817	1	0.133	Q55AW0_DICDI	Q553P9_DICDI	Q54JL2_DICDI	Q54N92_DICDI	Q54WH0_DICDI	Q54R87_DICDI	Q54U17_DICDI
biological_process	GO:0000725	recombinational repair	1	2	0.5	0.99991	0.000246097	1	0.133	Q54SX9_DICDI
biological_process	GO:0006623	protein targeting to vacuole	10	13	0.769231	0.999971	0.000274929	1	0.142	VP13A_DICDI	VP13C_DICDI	VP13F_DICDI	VPS37_DICDI	VP13D_DICDI	VP13E_DICDI	VP13B_DICDI	VPS15_DICDI	Q54EK0_DICDI	Q54LI4_DICDI
biological_process	GO:0000724	double-strand break repair via homologous recombination	19	34	0.558824	0.999892	0.000295401	1	0.148	SMC6_DICDI	SOSSB_DICDI	Y6689_DICDI	XPF_DICDI	RA51D_DICDI	Q55AZ3_DICDI	Q54MD0_DICDI	Q54G98_DICDI	Q54DM3_DICDI	Q54NP1_DICDI	Q55BN5_DICDI	Q54EK9_DICDI	Q54KW0_DICDI	Q54BU8_DICDI	Q54C05_DICDI	Q556X5_DICDI	Q54KV9_DICDI	Q55E38_DICDI	B0G0Y4_DICDI
biological_process	GO:0072666	establishment of protein localization to vacuole	0	1	0	0.999951	0.000295904	1	0.149
biological_process	GO:0007098	centrosome cycle	8	10	0.8	0.999962	0.000298165	1	0.157	SUN1_DICDI	NEK2_DICDI	KIF9_DICDI	NDRC_DICDI	Q54DL5_DICDI	Q54RJ3_DICDI	Q54NE5_DICDI	Q86A08_DICDI
biological_process	GO:0006898	receptor-mediated endocytosis	5	6	0.833333	0.999962	0.000298165	1	0.157	AP4E_DICDI	AP2A2_DICDI	AP1G_DICDI	CLH_DICDI	Q54LZ3_DICDI
biological_process	GO:0007064	mitotic sister chromatid cohesion	4	7	0.571429	0.999962	0.000298165	1	0.157	SMC3_DICDI	PDS5_DICDI	Q54E85_DICDI	Q550H7_DICDI
biological_process	GO:0006338	chromatin remodeling	12	18	0.666667	0.999861	0.000441208	1	0.189	Y3800_DICDI	Y0170_DICDI	ARP8_DICDI	NC2B_DICDI	Q54CI4_DICDI	Q550R6_DICDI	Q54YQ6_DICDI	Q54DG0_DICDI	Q54C28_DICDI	Q54UQ7_DICDI	Q55ER4_DICDI	Q54WV6_DICDI
biological_process	GO:0043085	positive regulation of catalytic activity	3	3	1	0.999781	0.000460333	1	0.197	ATG1_DICDI	APH1_DICDI	Q54KM1_DICDI
biological_process	GO:0070918	primary sncRNA processing	0	1	0	0.999978	0.000472795	1	0.226
biological_process	GO:0000375	RNA splicing, via transesterification reactions	4	7	0.571429	0.999728	0.000542548	1	0.248	PRP19_DICDI	SLU7_DICDI	Q54MH4_DICDI	Q8MML7_DICDI
biological_process	GO:0051301	cell division	31	61	0.508197	0.999674	0.000575323	1	0.249	KIF13_DICDI	APC4_DICDI	APC5_DICDI	KIF4_DICDI	KIF8_DICDI	MPIP_DICDI	CDH1_DICDI	CDC23_DICDI	APC2_DICDI	FTSZA_DICDI	SMC3_DICDI	SMC4_DICDI	SUN1_DICDI	PDS5_DICDI	SVKA_DICDI	APC3_DICDI	CDK7_DICDI	KIF10_DICDI	APC1_DICDI	ERK1_DICDI	CDC26_DICDI	DNLI3_DICDI	Q86I09_DICDI	Q54WY1_DICDI	Q55CA1_DICDI	Q54XZ6_DICDI	Q54WM1_DICDI	Q54QB4_DICDI	Q54HI6_DICDI	Q54B17_DICDI	Q54DR4_DICDI
biological_process	GO:0007034	vacuolar transport	3	4	0.75	0.999764	0.000629904	1	0.265	VPS15_DICDI	Q54XD2_DICDI	Q54CU5_DICDI
biological_process	GO:0000184	nuclear-transcribed mRNA catabolic process, nonsense-mediated decay	9	12	0.75	0.999919	0.000720619	1	0.323	SMG1_DICDI	RENT1_DICDI	Q54DH9_DICDI	Q54R12_DICDI	Q54TQ1_DICDI	Q54R87_DICDI	Q54P97_DICDI	Q75JP6_DICDI	Q557E3_DICDI
biological_process	GO:0034244	negative regulation of transcription elongation from RNA polymerase II promoter	6	6	1	1	0.000782619	1	0.394	MED15_DICDI	Q55F13_DICDI	Q54LZ1_DICDI	Q55FN0_DICDI	Q54Q08_DICDI	Q75JP0_DICDI
biological_process	GO:0071169	establishment of protein localization to chromatin	6	6	1	1	0.000782619	1	0.394	Q55GF7_DICDI	Q54VK4_DICDI	Q54RK7_DICDI	Q54PY6_DICDI	Q54E44_DICDI	Q86J15_DICDI
biological_process	GO:0043570	maintenance of DNA repeat elements	3	3	1	1	0.000782619	1	0.394	MSH3_DICDI	MSH6_DICDI	MSH2_DICDI
biological_process	GO:0000398	mRNA splicing, via spliceosome	39	88	0.443182	0.999579	0.000824848	1	0.399	RU2B_DICDI	RU17_DICDI	BBP_DICDI	CRNL1_DICDI	PRP19_DICDI	MFAP1_DICDI	NCBP2_DICDI	SYF1_DICDI	SF3A1_DICDI	SLU7_DICDI	RUXF_DICDI	SNWA_DICDI	Y8236_DICDI	DDX46_DICDI	DDX41_DICDI	Q54B40_DICDI	Q8T2A7_DICDI	Q54I26_DICDI	Q54MH4_DICDI	Q54BJ4_DICDI	Q55A15_DICDI	Q54LY9_DICDI	Q54X23_DICDI	Q55GN2_DICDI	Q54NS6_DICDI	Q54FG3_DICDI	Q8T2I0_DICDI	Q55BL6_DICDI	Q1ZXF6_DICDI	Q54NJ5_DICDI	Q55EN0_DICDI	Q55CC1_DICDI	Q54QY2_DICDI	Q54LV5_DICDI	Q54R72_DICDI	Q54JF1_DICDI	Q55BV8_DICDI	Q54VL9_DICDI	Q54LX5_DICDI
biological_process	GO:0007010	cytoskeleton organization	5	14	0.357143	0.999439	0.000848112	1	0.404	STRP_DICDI	Y5837_DICDI	Q54WT5_DICDI	Q1ZX99_DICDI	Q54JI4_DICDI
biological_process	GO:0034976	response to endoplasmic reticulum stress	3	5	0.6	0.999564	0.00108434	1	0.442	UFL1_DICDI	Q54UW6_DICDI	Q86HI2_DICDI
biological_process	GO:0010628	positive regulation of gene expression	24	51	0.470588	0.999484	0.00120836	1	0.46	PHG2_DICDI	STATC_DICDI	RBLA_DICDI	BZPF_DICDI	HD_DICDI	GTAG_DICDI	MED23_DICDI	PYK3_DICDI	STATA_DICDI	STLB_DICDI	PKS1_DICDI	YAKA_DICDI	SPLB_DICDI	Y1197_DICDI	DIMB_DICDI	KAPC_DICDI	HBX9_DICDI	CAR4_DICDI	CUDA_DICDI	Q54XJ7_DICDI	Q86AD8_DICDI	Q86AY8_DICDI	Q86J14_DICDI	O15755_DICDI
biological_process	GO:0016197	endosomal transport	8	13	0.615385	0.999484	0.00120836	1	0.46	BL1S1_DICDI	MYOB_DICDI	EPS15_DICDI	CL16A_DICDI	Q55BN5_DICDI	Q54NP5_DICDI	Q55DJ6_DICDI	Q54SJ9_DICDI
biological_process	GO:0046777	protein autophosphorylation	13	21	0.619048	0.99972	0.00127018	1	0.468	PAKB_DICDI	STK11_DICDI	DHKA_DICDI	PYK3_DICDI	STK4L_DICDI	MYLKF_DICDI	SPLB_DICDI	SVKA_DICDI	DGKA_DICDI	DHKH_DICDI	ATG1_DICDI	MHCKA_DICDI	DYRK1_DICDI
biological_process	GO:0040011	locomotion	4	8	0.5	0.999164	0.00128206	1	0.471	PAXB_DICDI	SRFA_DICDI	DIMB_DICDI	Q94491_DICDI
biological_process	GO:0090307	mitotic spindle assembly	5	6	0.833333	0.999928	0.00139472	1	0.523	KIF13_DICDI	KIF4_DICDI	DYHC_DICDI	Q54G01_DICDI	Q54NE5_DICDI
biological_process	GO:0043484	regulation of RNA splicing	4	4	1	0.999928	0.00139472	1	0.523	RU17_DICDI	Q54UV0_DICDI	Q54PW8_DICDI	Q54YS7_DICDI
biological_process	GO:0046854	phosphatidylinositol phosphate biosynthetic process	12	19	0.631579	0.999704	0.00143307	1	0.543	PI3K2_DICDI	PI3K3_DICDI	FYV1_DICDI	PI4K_DICDI	Q55FX5_DICDI	Q54UU9_DICDI	Q54QM1_DICDI	Q54ZN9_DICDI	Q54S78_DICDI	Q54XR3_DICDI	Q54LR9_DICDI	Q54F55_DICDI
biological_process	GO:0000723	telomere maintenance	9	12	0.75	0.999697	0.00159334	1	0.584	KU70_DICDI	PRKDC_DICDI	XRCC5_DICDI	RA51D_DICDI	ATR1_DICDI	Q55FJ4_DICDI	Q54Z42_DICDI	Q54JQ5_DICDI	Q54B44_DICDI
biological_process	GO:0007346	regulation of mitotic cell cycle	3	7	0.428571	0.999386	0.00160052	1	0.588	CDC26_DICDI	Q55BL8_DICDI	C7G050_DICDI
biological_process	GO:0045053	protein retention in Golgi apparatus	8	10	0.8	0.999842	0.00173034	1	0.634	VP13A_DICDI	VP13C_DICDI	VP13F_DICDI	VP13D_DICDI	VP13E_DICDI	VP13B_DICDI	VPS15_DICDI	Q86IF6_DICDI
biological_process	GO:0009966	regulation of signal transduction	0	4	0	0.99892	0.00183637	1	0.668
biological_process	GO:0034243	regulation of transcription elongation from RNA polymerase II promoter	0	1	0	0.999725	0.00183484	1	0.668
biological_process	GO:0008380	RNA splicing	8	22	0.363636	0.998839	0.00203813	1	0.698	SF3B4_DICDI	RU17_DICDI	HELCL_DICDI	SMN1_DICDI	SPF27_DICDI	SLU7_DICDI	Q1ZXG7_DICDI	Q54LX5_DICDI
biological_process	GO:0043547	positive regulation of GTPase activity	8	13	0.615385	0.9991	0.00210616	1	0.704	DARA_DICDI	PSRA_DICDI	RGAP1_DICDI	GEFQ_DICDI	Q54WI0_DICDI	Q551Q8_DICDI	Q54VB2_DICDI	Q54DM6_DICDI
biological_process	GO:0008104	protein localization	9	14	0.642857	0.998422	0.00214648	1	0.705	LVSA_DICDI	LVSB_DICDI	LVSC_DICDI	LVSD_DICDI	LVSE_DICDI	ICPA_DICDI	IST1L_DICDI	EB1_DICDI	Q54U23_DICDI
biological_process	GO:0070647	protein modification by small protein conjugation or removal	1	1	1	0.998588	0.00224607	1	0.719	Q555F9_DICDI
biological_process	GO:0007018	microtubule-based movement	13	19	0.684211	0.99942	0.0023444	1	0.724	KIF12_DICDI	KIF13_DICDI	KIF7_DICDI	DC1L1_DICDI	KIF4_DICDI	KIF8_DICDI	DYHC_DICDI	KIF6_DICDI	KIF9_DICDI	KIF1_DICDI	KIF10_DICDI	KIF3_DICDI	DYIN_DICDI
biological_process	GO:0000077	DNA damage checkpoint signaling	8	13	0.615385	0.99942	0.0023444	1	0.724	DOT1L_DICDI	FHKC_DICDI	IFKC_DICDI	ATR1_DICDI	Q54LN0_DICDI	Q54D34_DICDI	Q55E62_DICDI	Q869Q1_DICDI
biological_process	GO:1990116	ribosome-associated ubiquitin-dependent protein catabolic process	5	5	1	1	0.00258068	1	0.791	LTN1_DICDI	ASCC2_DICDI	ASCC3_DICDI	Q54HA7_DICDI	Q55G56_DICDI
biological_process	GO:0031053	primary miRNA processing	5	5	1	1	0.00258068	1	0.791	Q54HU7_DICDI	Q55E25_DICDI	Q55FS1_DICDI	Q54ZS5_DICDI	Q95ZG5_DICDI
biological_process	GO:0006396	RNA processing	13	24	0.541667	0.99798	0.00274778	1	0.801	CLP1_DICDI	NRDE2_DICDI	RTCA_DICDI	Q54HU7_DICDI	Q54C48_DICDI	Q550Y1_DICDI	Q55E25_DICDI	Q55FS1_DICDI	Q54E37_DICDI	Q54TL3_DICDI	Q54IC6_DICDI	Q54DI3_DICDI	Q95ZG5_DICDI
biological_process	GO:0006661	phosphatidylinositol biosynthetic process	2	4	0.5	0.998902	0.00276241	1	0.805	PI3K2_DICDI	Q54HT3_DICDI
biological_process	GO:0006470	protein dephosphorylation	15	28	0.535714	0.998936	0.00281023	1	0.81	PP2BA_DICDI	MPIP_DICDI	MPL1_DICDI	SPNA_DICDI	PATS1_DICDI	PTEN_DICDI	Y2105_DICDI	Y7071_DICDI	Y9461_DICDI	CNRN_DICDI	Q55C81_DICDI	Q553B4_DICDI	Q54GL8_DICDI	Q54PX6_DICDI	Q54QE5_DICDI
biological_process	GO:0032784	regulation of DNA-templated transcription, elongation	1	2	0.5	0.999306	0.00313521	1	0.832	Q54K42_DICDI
biological_process	GO:0072665	protein localization to vacuole	0	1	0	0.999032	0.00342488	1	0.841
biological_process	GO:0042147	retrograde transport, endosome to Golgi	15	29	0.517241	0.998767	0.00385235	1	0.86	Y5795_DICDI	WASC2_DICDI	Q76NU4_DICDI	Q553Q7_DICDI	Q54TC7_DICDI	Q54U23_DICDI	Q86HF6_DICDI	Q86IF6_DICDI	Q54YR7_DICDI	Q54WR7_DICDI	Q54NV0_DICDI	Q54MU4_DICDI	Q54TJ5_DICDI	Q54MJ6_DICDI	Q55BK2_DICDI
biological_process	GO:0051321	meiotic cell cycle	3	5	0.6	0.998408	0.00402893	1	0.878	SPC97_DICDI	SPC98_DICDI	CDK7_DICDI
biological_process	GO:0090110	COPII-coated vesicle cargo loading	6	7	0.857143	0.999763	0.00405489	1	0.905	SEC24_DICDI	SEC31_DICDI	Q54DB3_DICDI	Q54SU8_DICDI	Q54Z72_DICDI	Q55C90_DICDI
biological_process	GO:0036498	IRE1-mediated unfolded protein response	6	7	0.857143	0.999763	0.00405489	1	0.905	IRLB_DICDI	IRLC_DICDI	IRLE_DICDI	IRLA_DICDI	IRLF_DICDI	IREA_DICDI
biological_process	GO:0043937	regulation of sporulation	2	2	1	0.999763	0.00405489	1	0.905	Q54WI0_DICDI	Q551Q8_DICDI
biological_process	GO:0007052	mitotic spindle organization	7	14	0.5	0.998886	0.0040674	1	0.909	MTAA_DICDI	ICPA_DICDI	KIF6_DICDI	DCTN2_DICDI	Q553N8_DICDI	Q54WM1_DICDI	Q7KWK7_DICDI
biological_process	GO:0045786	negative regulation of cell cycle	1	1	1	0.998464	0.00410116	1	0.91	RBLA_DICDI
biological_process	GO:0000956	nuclear-transcribed mRNA catabolic process	3	9	0.333333	0.998102	0.00443786	1	0.919	Q558Y5_DICDI	Q55CS4_DICDI	Q75JF5_DICDI
biological_process	GO:0006275	regulation of DNA replication	2	5	0.4	0.999279	0.00439815	1	0.919	SMC3_DICDI	Q54W25_DICDI
biological_process	GO:0031122	cytoplasmic microtubule organization	6	8	0.75	0.999527	0.00462145	1	0.939	SPC97_DICDI	KIF8_DICDI	DYHC_DICDI	SPC98_DICDI	KIF10_DICDI	Q54VD6_DICDI
biological_process	GO:0071168	protein localization to chromatin	0	1	0	0.999527	0.00462145	1	0.939
biological_process	GO:0016246	RNA interference	4	6	0.666667	0.999365	0.00465205	1	0.942	Q1ZXG9_DICDI	Q54G64_DICDI	Q7KWS3_DICDI	Q86HF5_DICDI
biological_process	GO:0046907	intracellular transport	1	4	0.25	0.996457	0.0047858	1	0.943	Q54FE0_DICDI
biological_process	GO:0034504	protein localization to nucleus	1	2	0.5	0.998082	0.00487011	1	0.945	PTP3_DICDI
biological_process	GO:0042221	response to chemical	0	1	0	0.996104	0.00524212	1	0.955
biological_process	GO:0030154	cell differentiation	10	28	0.357143	0.996585	0.0054112	1	0.956	RBLA_DICDI	TAGA_DICDI	HD_DICDI	PSRA_DICDI	SPNA_DICDI	SRFC_DICDI	CAR4_DICDI	CUDA_DICDI	Q552K5_DICDI	Q550K3_DICDI
biological_process	GO:0045930	negative regulation of mitotic cell cycle	1	1	1	0.998288	0.00556618	1	0.956	BTG_DICDI
biological_process	GO:0045132	meiotic chromosome segregation	2	2	1	0.998567	0.00568842	1	0.957	Q54WM1_DICDI	Q54W25_DICDI
biological_process	GO:0009968	negative regulation of signal transduction	1	1	1	0.99719	0.00684043	1	0.971	SHKA_DICDI
biological_process	GO:0006511	ubiquitin-dependent protein catabolic process	31	86	0.360465	0.994472	0.00824208	1	0.985	DDI1_DICDI	FBXA_DICDI	PSMD4_DICDI	UBPB_DICDI	UCHL5_DICDI	Q54LZ6_DICDI	Q86I15_DICDI	Q55BI4_DICDI	Q550P6_DICDI	Q54PQ7_DICDI	Q54XF1_DICDI	Q54BB6_DICDI	Q869U4_DICDI	Q54VX1_DICDI	Q556A3_DICDI	Q86J16_DICDI	B0G199_DICDI	Q54F86_DICDI	Q54ND8_DICDI	Q54DM8_DICDI	Q553T4_DICDI	Q54QC7_DICDI	Q54DT4_DICDI	Q86KB3_DICDI	Q86J06_DICDI	Q54JQ6_DICDI	Q55AP9_DICDI	Q54IK3_DICDI	Q54H96_DICDI	Q54S82_DICDI	Q55EJ1_DICDI
biological_process	GO:0044772	mitotic cell cycle phase transition	0	3	0	0.996606	0.00827469	1	0.985
biological_process	GO:0031150	sorocarp stalk development	4	7	0.571429	0.99612	0.00874994	1	0.996	DCSA_DICDI	DHKA_DICDI	ROCO4_DICDI	C7FZZ0_DICDI
biological_process	GO:0090435	protein localization to nuclear envelope	1	1	1	1	0.00850629	1	0.996	Q54BP1_DICDI
biological_process	GO:0043327	chemotaxis to cAMP	42	100	0.42	0.994493	0.00958587	1	0.997	PDPKA_DICDI	PDPKB_DICDI	PI3K2_DICDI	PDE5_DICDI	PK2_DICDI	TORA_DICDI	LVSE_DICDI	MP2K1_DICDI	GACH_DICDI	GAPA_DICDI	HD_DICDI	PAXB_DICDI	MPL1_DICDI	PI4K_DICDI	PSRA_DICDI	PAKA_DICDI	PAKE_DICDI	RIP3_DICDI	PAKD_DICDI	STK4L_DICDI	PHR_DICDI	PKS1_DICDI	PTEN_DICDI	Y7588_DICDI	Y1676_DICDI	Y1806_DICDI	TSUA_DICDI	Y7875_DICDI	MYOB_DICDI	MYOG_DICDI	KAPC_DICDI	GEFM_DICDI	ELMOE_DICDI	ERK1_DICDI	DHKI_DICDI	Q557I6_DICDI	Q551V8_DICDI	Q55DL8_DICDI	Q54CF8_DICDI	Q7KWP7_DICDI
biological_process	GO:0006935	chemotaxis	19	56	0.339286	0.993692	0.00969957	1	0.997	PHG2_DICDI	PI3K2_DICDI	LIMB_DICDI	MED13_DICDI	MHCKC_DICDI	HD_DICDI	IPLA_DICDI	DIMA_DICDI	PAKA_DICDI	SHKA_DICDI	SPKA_DICDI	PTEN_DICDI	YAKA_DICDI	YELA_DICDI	ABCB1_DICDI	MHCKA_DICDI	Q86KX8_DICDI	Q551V8_DICDI	Q54SZ1_DICDI
biological_process	GO:0006796	phosphate-containing compound metabolic process	0	2	0	0.992368	0.00987417	1	0.997
biological_process	GO:0033365	protein localization to organelle	0	1	0	0.993877	0.00948953	1	0.997
biological_process	GO:0072344	rescue of stalled ribosome	7	10	0.7	0.99827	0.0113674	1	0.999	LTN1_DICDI	ASCC2_DICDI	ASCC3_DICDI	Q86H89_DICDI	Q54LX3_DICDI	Q54HA7_DICDI	Q55G56_DICDI
biological_process	GO:0036297	interstrand cross-link repair	6	9	0.666667	0.99827	0.0113674	1	0.999	MSH6_DICDI	FAN1_DICDI	Q55F81_DICDI	Q8T145_DICDI	Q55DX7_DICDI	Q54WG5_DICDI
biological_process	GO:0006379	mRNA cleavage	5	6	0.833333	0.99827	0.0113674	1	0.999	CPSF2_DICDI	Q55CA3_DICDI	Q54YF5_DICDI	Q54IF1_DICDI	Q54WL8_DICDI
biological_process	GO:0098789	pre-mRNA cleavage required for polyadenylation	5	6	0.833333	0.999217	0.011571	1	0.999	CPSF2_DICDI	Q55CA3_DICDI	Q54IF1_DICDI	Q54V94_DICDI	Q54NB8_DICDI
biological_process	GO:0006999	nuclear pore organization	4	5	0.8	0.999217	0.011571	1	0.999	NUP54_DICDI	Q75JH1_DICDI	Q54XC5_DICDI	Q556V5_DICDI
biological_process	GO:0006997	nucleus organization	3	7	0.428571	0.996865	0.0115631	1	0.999	SUN1_DICDI	QKGA_DICDI	DYNA_DICDI
biological_process	GO:0006644	phospholipid metabolic process	3	7	0.428571	0.993124	0.0110214	1	0.999	FYV1_DICDI	PLDC_DICDI	PLDA_DICDI
biological_process	GO:0010212	response to ionizing radiation	1	1	1	0.999217	0.011571	1	0.999	SOSSB_DICDI
biological_process	GO:0008156	negative regulation of DNA replication	1	1	1	0.999217	0.011571	1	0.999	PDS5_DICDI
biological_process	GO:0030587	sorocarp development	73	194	0.376289	0.984633	0.0195984	1	1	PDPKA_DICDI	PDPKB_DICDI	PEFB_DICDI	PDE4_DICDI	PK2_DICDI	STATC_DICDI	TAGB_DICDI	SPLA_DICDI	TS101_DICDI	GRLJ_DICDI	LVSD_DICDI	MP2K1_DICDI	LMPA_DICDI	GACH_DICDI	GACT_DICDI	DIMA_DICDI	CYAD_DICDI	DHKA_DICDI	MKKA_DICDI	GTAG_DICDI	CYC8_DICDI	GBF_DICDI	BECNA_DICDI	MED23_DICDI	PSRA_DICDI	PYK3_DICDI	SEPA_DICDI	STATA_DICDI	ROCO5_DICDI	NOXC_DICDI	YAKA_DICDI	SPLB_DICDI	XRCC5_DICDI	Y1806_DICDI	Y7165_DICDI	YELA_DICDI	MGP2_DICDI	ABCA5_DICDI	DIMB_DICDI	ATG1_DICDI
biological_process	GO:0006886	intracellular protein transport	48	148	0.324324	0.817845	0.217711	1	1	RABJ_DICDI	RABY_DICDI	SEC24_DICDI	COPA_DICDI	AP4B_DICDI	AP4E_DICDI	AP2A2_DICDI	AP3B_DICDI	CPAS2_DICDI	COG7_DICDI	STX7A_DICDI	STX7B_DICDI	COG3_DICDI	SEC31_DICDI	TBCK_DICDI	TBC5B_DICDI	TBC5A_DICDI	AP1B_DICDI	AP1G_DICDI	CLH_DICDI	COPB2_DICDI	Q54F53_DICDI	Q54XD2_DICDI	Q55CS3_DICDI	Q75JG4_DICDI	Q54T42_DICDI	Q54SQ5_DICDI	Q54WP7_DICDI	Q55E78_DICDI	Q54WR7_DICDI	C7G032_DICDI	Q54Z72_DICDI	Q54YL8_DICDI	Q553U1_DICDI	Q54Y34_DICDI	Q54NT3_DICDI	Q54CU5_DICDI	Q1ZXK9_DICDI	Q54ZD6_DICDI	Q55C90_DICDI
biological_process	GO:0015031	protein transport	43	103	0.417476	0.927564	0.088516	1	1	TS101_DICDI	COG4_DICDI	KIF12_DICDI	EXOC7_DICDI	IST1L_DICDI	COG2_DICDI	ADCB_DICDI	ADCA_DICDI	BECNA_DICDI	COG5_DICDI	EXOC5_DICDI	COG6_DICDI	COG8_DICDI	NUP98_DICDI	COG1_DICDI	EXOC2_DICDI	EXOC4_DICDI	BECNB_DICDI	VTA1_DICDI	VP35L_DICDI	CHMP7_DICDI	ATG1_DICDI	ATG4_DICDI	ATG7_DICDI	EPS15_DICDI	GLE1_DICDI	ADCF_DICDI	ADCC_DICDI	Q54C87_DICDI	Q54JM8_DICDI	Q86HF6_DICDI	Q55BR0_DICDI	Q54XV4_DICDI	Q54LI4_DICDI	Q54QM7_DICDI	Q54DQ9_DICDI	Q54G75_DICDI	Q54LH0_DICDI	Q54VC2_DICDI	Q54QH2_DICDI
biological_process	GO:0031152	aggregation involved in sorocarp development	42	130	0.323077	0.373208	0.690101	1	1	PDE5_DICDI	PAKB_DICDI	TRIA_DICDI	TORA_DICDI	SET1_DICDI	IFKA_DICDI	MP2K1_DICDI	LIMB_DICDI	GTAC_DICDI	DARA_DICDI	MED13_DICDI	DBNL_DICDI	IPLA_DICDI	ADCB_DICDI	NRAM2_DICDI	PI4K_DICDI	PAKA_DICDI	RIP3_DICDI	PAKD_DICDI	SRFB_DICDI	STK4L_DICDI	PKS1_DICDI	PTEN_DICDI	YAKA_DICDI	Y7071_DICDI	ABCGG_DICDI	MYBB_DICDI	CNRN_DICDI	AP1B_DICDI	CLH_DICDI	GEFB_DICDI	ERK1_DICDI	ADCC_DICDI	Q557I6_DICDI	Q55AA6_DICDI	Q86AD8_DICDI	Q86I19_DICDI	Q55FC8_DICDI	Q86A02_DICDI	Q55BY0_DICDI
biological_process	GO:0016567	protein ubiquitination	38	87	0.436782	0.970015	0.044	1	1	APC5_DICDI	CDH1_DICDI	CDC23_DICDI	APC2_DICDI	Y3893_DICDI	APC3_DICDI	EIPR1_DICDI	MED8_DICDI	APC1_DICDI	Q557I6_DICDI	Q550P1_DICDI	C7G079_DICDI	Q54QZ3_DICDI	Q55E19_DICDI	C7G034_DICDI	Q54DM4_DICDI	Q55DJ0_DICDI	Q550P6_DICDI	Q75JM9_DICDI	Q54XF1_DICDI	Q54EA4_DICDI	Q559W7_DICDI	Q55E18_DICDI	Q86H89_DICDI	Q54LX3_DICDI	Q54XR0_DICDI	Q54RD2_DICDI	Q54SL8_DICDI	Q554L0_DICDI	Q55DX7_DICDI	Q54RC2_DICDI	Q55DJ2_DICDI	Q54IW6_DICDI	Q54TM9_DICDI	Q550K3_DICDI	Q54NV4_DICDI	O44007_DICDI	Q557D0_DICDI
biological_process	GO:0000281	mitotic cytokinesis	36	101	0.356436	0.946021	0.0806665	1	1	PHG2_DICDI	MTAA_DICDI	PAKB_DICDI	LVSA_DICDI	KIF12_DICDI	LMPA_DICDI	GAPA_DICDI	ICPA_DICDI	MHCKC_DICDI	EPN_DICDI	DWWA_DICDI	PAXB_DICDI	PPK1_DICDI	DLPC_DICDI	PAKA_DICDI	SEPA_DICDI	SPKA_DICDI	PATS1_DICDI	SUN2_DICDI	PTEN_DICDI	Y6689_DICDI	PIRA_DICDI	NDRC_DICDI	HBX4_DICDI	MHCKA_DICDI	EB1_DICDI	DTFA_DICDI	AP1B_DICDI	CLU_DICDI	CLH_DICDI	Q54WI0_DICDI	Q54VM5_DICDI	Q55DL8_DICDI	C7FZZ0_DICDI	Q75JH9_DICDI	Q86A08_DICDI
biological_process	GO:0048870	cell motility	35	91	0.384615	0.980061	0.0314951	1	1	PHG2_DICDI	PI3K2_DICDI	PI3K3_DICDI	MED13_DICDI	DBNL_DICDI	CTNA_DICDI	PAXB_DICDI	ELMOF_DICDI	PSRA_DICDI	PAKA_DICDI	PLDC_DICDI	STK4L_DICDI	PTEN_DICDI	PLDA_DICDI	Y1806_DICDI	PIRA_DICDI	ELMOC_DICDI	ELMOA_DICDI	MYOB_DICDI	DOKA_DICDI	CNRN_DICDI	GEFB_DICDI	ELMOE_DICDI	DHKI_DICDI	Q55FX5_DICDI	Q54WI0_DICDI	Q557Q0_DICDI	Q553B4_DICDI	Q54S78_DICDI	Q54DS6_DICDI	Q54Q49_DICDI	Q86KG9_DICDI	Q55B61_DICDI	Q557G6_DICDI	Q54K01_DICDI
biological_process	GO:0030435	sporulation resulting in formation of a cellular spore	27	76	0.355263	0.9703	0.0492212	1	1	TRIA_DICDI	SPLA_DICDI	GRLJ_DICDI	EPN_DICDI	DIMA_DICDI	CYAD_DICDI	DHKA_DICDI	MKKA_DICDI	FBXA_DICDI	DMTA_DICDI	BECNA_DICDI	D7_DICDI	NDUF5_DICDI	PPK1_DICDI	PSV_DICDI	SRFA_DICDI	NOXC_DICDI	YELA_DICDI	ATG1_DICDI	ATG7_DICDI	KAPC_DICDI	DOKA_DICDI	CNRN_DICDI	CMT1_DICDI	CLH_DICDI	CRTF_DICDI	CUDA_DICDI
biological_process	GO:0031288	sorocarp morphogenesis	26	80	0.325	0.60388	0.488169	1	1	PK2_DICDI	STATC_DICDI	BZPF_DICDI	BZPR_DICDI	CYAD_DICDI	DHKA_DICDI	DHKD_DICDI	GYS_DICDI	DMTA_DICDI	BECNA_DICDI	PPK1_DICDI	RIR1_DICDI	STLB_DICDI	ABCA5_DICDI	ABCCD_DICDI	ABCGG_DICDI	DHKB_DICDI	ATG1_DICDI	ABCB4_DICDI	ABCC8_DICDI	ABCF4_DICDI	ATG7_DICDI	KAPC_DICDI	DYNA_DICDI	Q55CT4_DICDI	Q559F5_DICDI
biological_process	GO:0007264	small GTPase mediated signal transduction	26	65	0.4	0.92878	0.0999055	1	1	QKGA_DICDI	GBPD_DICDI	GEFC_DICDI	GEFD_DICDI	GEFE_DICDI	GEFG_DICDI	GEFI_DICDI	GEFJ_DICDI	GEFK_DICDI	GEFL_DICDI	GEFM_DICDI	GEFN_DICDI	GEFP_DICDI	GEFS_DICDI	GEFV_DICDI	GEFW_DICDI	GEFX_DICDI	GEFY_DICDI	Q54Y59_DICDI	Q54DW1_DICDI	Q54XL4_DICDI	Q554I8_DICDI	Q86I66_DICDI	Q54DS6_DICDI	Q54WL2_DICDI	Q54SG9_DICDI
biological_process	GO:0031154	culmination involved in sorocarp development	26	83	0.313253	0.976027	0.034827	1	1	TRIA_DICDI	LVSB_DICDI	LIMB_DICDI	BZPF_DICDI	FORC_DICDI	DHKK_DICDI	FBXA_DICDI	DMTA_DICDI	PAXB_DICDI	NDUF5_DICDI	SRFA_DICDI	STATA_DICDI	SUN2_DICDI	VP13C_DICDI	ABCCD_DICDI	ABCGG_DICDI	ABCB1_DICDI	ABCC8_DICDI	KAPC_DICDI	CMT1_DICDI	CAR4_DICDI	CUDA_DICDI	Q54Q13_DICDI	Q54T71_DICDI	Q54T92_DICDI	Q94491_DICDI
biological_process	GO:0090630	activation of GTPase activity	23	51	0.45098	0.99125	0.0183763	1	1	TBCK_DICDI	Y1806_DICDI	TBC5B_DICDI	TBC5A_DICDI	RGAP1_DICDI	KAPC_DICDI	GEFE_DICDI	Q75JG4_DICDI	Q54SQ5_DICDI	Q54WP7_DICDI	Q55E78_DICDI	C7G032_DICDI	Q54YL8_DICDI	Q553U1_DICDI	Q54NT3_DICDI	Q54KE5_DICDI	Q54RT1_DICDI	Q869V0_DICDI	Q54RA7_DICDI	Q54RS9_DICDI	Q54Z16_DICDI	Q55CN5_DICDI	Q54SG9_DICDI
biological_process	GO:0006364	rRNA processing	22	72	0.305556	0.0108964	0.993437	0.972	1	DDX54_DICDI	BYST_DICDI	MDN1_DICDI	NVL_DICDI	RRP8_DICDI	RRP1_DICDI	HEAT1_DICDI	DDX27_DICDI	Q54HU7_DICDI	Q54QK3_DICDI	Q54XB2_DICDI	Q54P10_DICDI	Q54X98_DICDI	Q55GQ7_DICDI	Q55EM8_DICDI	Q54P34_DICDI	Q54WV7_DICDI	Q54IM3_DICDI	Q55EB8_DICDI	Q54EN2_DICDI	Q54N18_DICDI	Q54I45_DICDI
biological_process	GO:0016192	vesicle-mediated transport	21	76	0.276316	0.82393	0.203123	1	1	AP4B_DICDI	AP3B_DICDI	STX7A_DICDI	STX7B_DICDI	YIPF1_DICDI	AP1B_DICDI	AP4M_DICDI	Q55AA6_DICDI	Q54F53_DICDI	Q55CS3_DICDI	Q54KQ8_DICDI	Q54VS5_DICDI	Q54JP0_DICDI	Q54HF9_DICDI	Q54T42_DICDI	Q54M79_DICDI	Q54W41_DICDI	Q54Y34_DICDI	Q55AI4_DICDI	Q54U74_DICDI	Q54HB8_DICDI
biological_process	GO:0007015	actin filament organization	19	63	0.301587	0.591102	0.472247	1	1	PHG2_DICDI	EPN_DICDI	COROB_DICDI	DWWA_DICDI	ELMOF_DICDI	ELMOC_DICDI	ELMOA_DICDI	MYOB_DICDI	MYOG_DICDI	MYOH_DICDI	MYOJ_DICDI	DYNA_DICDI	GEFB_DICDI	ELMOE_DICDI	Q1ZXE9_DICDI	Q54NW3_DICDI	Q7KWP7_DICDI	Q54R15_DICDI	Q54K01_DICDI
biological_process	GO:0006633	fatty acid biosynthetic process	18	50	0.36	0.426486	0.673463	1	1	PKS44_DICDI	PKS40_DICDI	PKS14_DICDI	PKS25_DICDI	PKS23_DICDI	PKS21_DICDI	PKS41_DICDI	PKS38_DICDI	PKS3_DICDI	STLB_DICDI	PKS24_DICDI	PKS13_DICDI	PKS1_DICDI	PKS22_DICDI	PKS2_DICDI	PKS18_DICDI	PKS42_DICDI	ACAC_DICDI
biological_process	GO:0006909	phagocytosis	16	84	0.190476	0.000503675	0.999753	0.125	1	PHG2_DICDI	PAKB_DICDI	LVSA_DICDI	COROB_DICDI	PPK1_DICDI	PAKA_DICDI	SHKA_DICDI	WASC5_DICDI	MYOB_DICDI	DYNA_DICDI	DYNB_DICDI	GEFB_DICDI	APH1_DICDI	Q54I12_DICDI	C7FZZ0_DICDI	Q86KG9_DICDI
biological_process	GO:0009617	response to bacterium	16	95	0.168421	0.00185749	0.999061	0.434	1	PI3K2_DICDI	PI3K3_DICDI	PEFA_DICDI	COROB_DICDI	NRAM2_DICDI	ATG1_DICDI	CDIP1_DICDI	DYNA_DICDI	DYNB_DICDI	Q55FX5_DICDI	Q54G64_DICDI	Q54WI0_DICDI	Q54S78_DICDI	Q55CE3_DICDI	Q54F55_DICDI	Q54YD3_DICDI
biological_process	GO:0030433	ubiquitin-dependent ERAD pathway	16	36	0.444444	0.967211	0.0664385	1	1	DERL2_DICDI	Y5729_DICDI	Q55E19_DICDI	Q54Y35_DICDI	Q54SX5_DICDI	Q55DT6_DICDI	Q55E18_DICDI	Q54U33_DICDI	Q54TF9_DICDI	Q55C65_DICDI	Q54RC2_DICDI	Q55DJ2_DICDI	Q54QA5_DICDI	Q54MR8_DICDI	Q54NV4_DICDI	O44007_DICDI
biological_process	GO:0006310	DNA recombination	15	50	0.3	0.986881	0.0209656	1	1	MSH3_DICDI	MSH2_DICDI	KU70_DICDI	XRCC5_DICDI	IN80D_DICDI	RAD50_DICDI	ARP8_DICDI	DNLI4_DICDI	DNLI3_DICDI	Q54DM3_DICDI	Q55FJ4_DICDI	Q54QN3_DICDI	Q54QU4_DICDI	Q54Z42_DICDI	B0G0Y4_DICDI
biological_process	GO:0006457	protein folding	14	64	0.21875	0.130339	0.913972	1	1	DNJA1_DICDI	PFD2_DICDI	PFD6_DICDI	TBCC_DICDI	PFD5_DICDI	TBCD_DICDI	AHSA_DICDI	Q55D95_DICDI	Q54PX2_DICDI	Q54UW6_DICDI	Q54SQ0_DICDI	Q55EH3_DICDI	Q86HI2_DICDI	Q55BE5_DICDI
biological_process	GO:0055085	transmembrane transport	14	44	0.318182	0.00613278	0.996373	0.832	1	TAGA_DICDI	TAGB_DICDI	CTLHB_DICDI	ABCC7_DICDI	ABCCD_DICDI	ABCCF_DICDI	ABCB1_DICDI	ABCB4_DICDI	ABCC5_DICDI	ABCC8_DICDI	ABCC1_DICDI	Q54BH1_DICDI	Q55BP1_DICDI	Q54EQ3_DICDI
biological_process	GO:0006887	exocytosis	14	40	0.35	0.682378	0.420683	1	1	LVSB_DICDI	MGP1_DICDI	EXOC7_DICDI	GXCB_DICDI	EXOC5_DICDI	EXOC2_DICDI	EXOC4_DICDI	STX7A_DICDI	WASC5_DICDI	WASC2_DICDI	MGP2_DICDI	MYOB_DICDI	Q54RR0_DICDI	Q54WI0_DICDI
biological_process	GO:0006897	endocytosis	13	36	0.361111	0.268077	0.786146	1	1	GXCB_DICDI	EPN_DICDI	KC1_DICDI	PAXB_DICDI	MYOB_DICDI	EPS15_DICDI	GEFB_DICDI	Q1ZXE9_DICDI	Q54WI0_DICDI	Q54U23_DICDI	Q55DJ6_DICDI	Q54F48_DICDI	Q54U74_DICDI
biological_process	GO:0000209	protein polyubiquitination	13	52	0.25	0.571483	0.541295	1	1	Q54LZ6_DICDI	Q86I15_DICDI	C7G034_DICDI	Q54KQ4_DICDI	Q54SX5_DICDI	Q54UA7_DICDI	Q54F86_DICDI	Q54U33_DICDI	Q54DM8_DICDI	Q54QC7_DICDI	Q54FR5_DICDI	Q54IK3_DICDI	O44007_DICDI
biological_process	GO:0006888	endoplasmic reticulum to Golgi vesicle-mediated transport	13	46	0.282609	0.866966	0.204103	1	1	COPA_DICDI	SEC31_DICDI	COPB2_DICDI	Q55CA1_DICDI	Q54XV4_DICDI	Q54TK7_DICDI	Q54VC2_DICDI	Q8T2J5_DICDI	Q54CV2_DICDI	Q54QH2_DICDI	Q54LB2_DICDI	Q553R1_DICDI	Q556P7_DICDI
biological_process	GO:0030041	actin filament polymerization	13	41	0.317073	0.266041	0.802056	1	1	MGP1_DICDI	FORE_DICDI	FORB_DICDI	FORD_DICDI	CTNA_DICDI	FORF_DICDI	PAKD_DICDI	PTEN_DICDI	WASC5_DICDI	Y1676_DICDI	MYOG_DICDI	ELMOE_DICDI	C7FZZ0_DICDI
biological_process	GO:0006406	mRNA export from nucleus	13	21	0.619048	0.989307	0.0264427	1	1	Y2175_DICDI	Y3534_DICDI	AAC3_DICDI	GLE1_DICDI	Q54JG6_DICDI	Q54BY1_DICDI	Q86IW7_DICDI	Q54YK3_DICDI	Q1ZXD7_DICDI	Q55DW5_DICDI	Q54F78_DICDI	Q54XC9_DICDI	Q54NB3_DICDI
biological_process	GO:0019954	asexual reproduction	12	42	0.285714	0.750464	0.338233	1	1	PI3K2_DICDI	TIRA_DICDI	CSN5_DICDI	ERK1_DICDI	Q55FX5_DICDI	Q86AD8_DICDI	Q54G01_DICDI	Q55DL8_DICDI	Q54CF8_DICDI	Q54BP1_DICDI	Q550K3_DICDI	Q8I7P3_DICDI
biological_process	GO:0140582	adenylate cyclase-activating G protein-coupled cAMP receptor signaling pathway	12	26	0.461538	0.971978	0.0654411	1	1	PDE6_DICDI	IFKA_DICDI	DCX_DICDI	GTAC_DICDI	HD_DICDI	DHKA_DICDI	DHKK_DICDI	GBF_DICDI	SRFB_DICDI	YAKA_DICDI	Y1197_DICDI	Q86AD8_DICDI
biological_process	GO:0006972	hyperosmotic response	12	44	0.272727	0.574515	0.552979	1	1	STATC_DICDI	GAPA_DICDI	ADCA_DICDI	CTDS_DICDI	PYK3_DICDI	YAKA_DICDI	SPLB_DICDI	SVKA_DICDI	ABCB1_DICDI	Q54Q41_DICDI	Q54GL6_DICDI	Q75J86_DICDI
biological_process	GO:0006606	protein import into nucleus	12	30	0.4	0.987862	0.0270966	1	1	IPO7_DICDI	IP13A_DICDI	OPI10_DICDI	ACAC_DICDI	Q54JG6_DICDI	Q55GW5_DICDI	Q86HD4_DICDI	Q54F20_DICDI	Q54KA3_DICDI	Q54XC9_DICDI	Q54WY2_DICDI	Q75JS7_DICDI
biological_process	GO:0051017	actin filament bundle assembly	12	32	0.375	0.880546	0.206395	1	1	GXCB_DICDI	DBNL_DICDI	FORC_DICDI	LIME_DICDI	MHCKA_DICDI	Q54TT8_DICDI	Q54XX0_DICDI	Q54FV6_DICDI	Q55C43_DICDI	Q54XN9_DICDI	Q75JH9_DICDI	Q54JG8_DICDI
biological_process	GO:0031156	regulation of sorocarp development	11	21	0.52381	0.987251	0.0252486	1	1	PHG2_DICDI	PP2BA_DICDI	RBLA_DICDI	DOT1L_DICDI	BZPF_DICDI	HD_DICDI	DHKL_DICDI	PAKA_DICDI	PYK3_DICDI	TBC5B_DICDI	SVKA_DICDI
biological_process	GO:0016477	cell migration	11	22	0.5	0.967765	0.070953	1	1	PI3K2_DICDI	PI3K3_DICDI	TORA_DICDI	PAXB_DICDI	ARPIN_DICDI	Q55FX5_DICDI	Q54UU9_DICDI	Q54S78_DICDI	Q54R15_DICDI	Q54PT8_DICDI	Q54F55_DICDI
biological_process	GO:0000122	negative regulation of transcription by RNA polymerase II	11	21	0.52381	0.990356	0.0287522	1	1	RBLA_DICDI	MED7_DICDI	TCF25_DICDI	Y6505_DICDI	NC2B_DICDI	NFX1_DICDI	Q54UJ3_DICDI	Q54IH7_DICDI	Q1ZXA2_DICDI	Q54K42_DICDI	Q54MS4_DICDI
biological_process	GO:0007030	Golgi organization	11	22	0.5	0.989503	0.0280225	1	1	MTAA_DICDI	COG2_DICDI	COG7_DICDI	COG3_DICDI	DYM_DICDI	Q54JP0_DICDI	Q54C46_DICDI	Q55BR0_DICDI	Q7KWQ0_DICDI	Q8T2J5_DICDI	Q556P7_DICDI
biological_process	GO:0031149	sorocarp stalk cell differentiation	11	23	0.478261	0.992869	0.0166669	1	1	PP2BA_DICDI	TAGB_DICDI	GTAC_DICDI	HD_DICDI	DHKD_DICDI	DMTA_DICDI	STATA_DICDI	STLB_DICDI	PKS1_DICDI	Y1806_DICDI	Q86L44_DICDI
biological_process	GO:0006891	intra-Golgi vesicle-mediated transport	11	20	0.55	0.994312	0.0187432	1	1	TPC10_DICDI	COPA_DICDI	COG2_DICDI	COG5_DICDI	COG6_DICDI	COG8_DICDI	COG1_DICDI	COG3_DICDI	COPB2_DICDI	Q54LB2_DICDI	Q54R70_DICDI
biological_process	GO:0048015	phosphatidylinositol-mediated signaling	10	17	0.588235	0.989503	0.0280225	1	1	PI3K2_DICDI	PI3K3_DICDI	PI4K_DICDI	PTEN_DICDI	Q55FX5_DICDI	Q54UU9_DICDI	Q54ZN9_DICDI	Q54S78_DICDI	Q54LR9_DICDI	Q54F55_DICDI
biological_process	GO:0000045	autophagosome assembly	10	23	0.434783	0.967765	0.070953	1	1	EMC6_DICDI	GYS_DICDI	BECNA_DICDI	BECNB_DICDI	VP13C_DICDI	ATG17_DICDI	ATG7_DICDI	Q54DQ9_DICDI	Q8MMZ9_DICDI	Q54T12_DICDI
biological_process	GO:0044671	sorocarp spore cell differentiation	10	19	0.526316	0.976299	0.0449617	1	1	PP2BA_DICDI	CYAD_DICDI	DHKD_DICDI	FORC_DICDI	PKS1_DICDI	Y7317_DICDI	ATG7_DICDI	KAPC_DICDI	APH1_DICDI	Q55FC8_DICDI
biological_process	GO:0006907	pinocytosis	10	57	0.175439	0.0697222	0.957747	1	1	PAKB_DICDI	LVSA_DICDI	MYOB_DICDI	DYNA_DICDI	CLH_DICDI	Q54LS7_DICDI	Q54R46_DICDI	Q55G51_DICDI	Q54WV8_DICDI	Q55G65_DICDI
biological_process	GO:0006914	autophagy	10	25	0.4	0.94379	0.0891449	1	1	RMC1_DICDI	ATG4_DICDI	CL16A_DICDI	APH1_DICDI	Q54BL5_DICDI	B0G190_DICDI	Q55BR0_DICDI	Q54QM7_DICDI	Q54ZD6_DICDI	Q55BY0_DICDI
biological_process	GO:0006367	transcription initiation from RNA polymerase II promoter	10	25	0.4	0.884453	0.205325	1	1	MED27_DICDI	T2FA_DICDI	TAF12_DICDI	Q55BH6_DICDI	Q54X70_DICDI	Q54SF3_DICDI	Q553J7_DICDI	C7G081_DICDI	Q54ZA9_DICDI	Q54KH7_DICDI
biological_process	GO:0007032	endosome organization	10	15	0.666667	0.981257	0.0517565	1	1	LVSA_DICDI	WASC5_DICDI	Y5795_DICDI	DYNA_DICDI	Q54ST5_DICDI	Q553Q7_DICDI	Q55CS3_DICDI	Q55CE3_DICDI	Q54LZ3_DICDI	Q55BK2_DICDI
biological_process	GO:1903665	negative regulation of asexual reproduction	9	22	0.409091	0.940916	0.128235	1	1	BZPN_DICDI	RBLA_DICDI	IPLA_DICDI	PPK1_DICDI	PAKD_DICDI	PTEN_DICDI	TBC5B_DICDI	QKGA_DICDI	CNRN_DICDI
biological_process	GO:0030036	actin cytoskeleton organization	9	33	0.272727	0.846358	0.188504	1	1	PI3K2_DICDI	SHKA_DICDI	SPKA_DICDI	MYOB_DICDI	GEFL_DICDI	GEFV_DICDI	Q54ST5_DICDI	Q54WI0_DICDI	Q54Q34_DICDI
biological_process	GO:0032060	bleb assembly	9	18	0.5	0.96475	0.0896726	1	1	PI3K2_DICDI	PI3K3_DICDI	PK2_DICDI	LVSA_DICDI	LIMB_DICDI	IPLA_DICDI	PTEN_DICDI	GBPD_DICDI	GEFB_DICDI
biological_process	GO:0014065	phosphatidylinositol 3-kinase signaling	9	13	0.692308	0.996427	0.013839	1	1	PI3K2_DICDI	PI3K3_DICDI	PTEN_DICDI	CNRN_DICDI	Q55FX5_DICDI	Q54UU9_DICDI	Q553B4_DICDI	Q54S78_DICDI	Q54F55_DICDI
biological_process	GO:0019953	sexual reproduction	9	137	0.0656934	6.94294e-13	1	0	1	GAPA_DICDI	GEFB_DICDI	Q54JT3_DICDI	Q55EH0_DICDI	Q550G2_DICDI	Q8T282_DICDI	Q54S21_DICDI	Q86HI2_DICDI	Q54WY3_DICDI
biological_process	GO:0043161	proteasome-mediated ubiquitin-dependent protein catabolic process	9	54	0.166667	0.930223	0.0956608	1	1	BZPE_DICDI	PSMD4_DICDI	Q54WU7_DICDI	C7G034_DICDI	Q54D90_DICDI	Q75JX9_DICDI	Q54QP3_DICDI	Q54S82_DICDI	Q54RN3_DICDI
biological_process	GO:1903669	positive regulation of chemorepellent activity	9	20	0.45	0.948243	0.120695	1	1	RBLA_DICDI	IPLA_DICDI	PAKD_DICDI	PTEN_DICDI	Y1197_DICDI	QKGA_DICDI	KAPC_DICDI	CNRN_DICDI	ERK1_DICDI
biological_process	GO:0006508	proteolysis	9	59	0.152542	0.493919	0.551821	1	1	TAGA_DICDI	PSB4_DICDI	ATG4_DICDI	APH1_DICDI	C7G025_DICDI	Q55CT4_DICDI	Q54H23_DICDI	Q54KG5_DICDI	Q54RM4_DICDI
biological_process	GO:0006412	translation	9	114	0.0789474	2.38929e-05	0.999987	0.004	1	HD_DICDI	RM21_DICDI	Q54PP3_DICDI	Q54G97_DICDI	Q54CA5_DICDI	Q55G90_DICDI	Q54DG6_DICDI	Q54K42_DICDI	Q54I61_DICDI
biological_process	GO:0006805	xenobiotic metabolic process	9	30	0.3	0.522668	0.631856	1	1	C519D_DICDI	C519B_DICDI	Q551B3_DICDI	Q54XF5_DICDI	Q54FE2_DICDI	Q54PM2_DICDI	Q54WB2_DICDI	Q554X7_DICDI	Q54P61_DICDI
biological_process	GO:0099139	cheating during chimeric sorocarp development	9	23	0.391304	0.871765	0.241607	1	1	FBXA_DICDI	DHKE_DICDI	PATS1_DICDI	PKS2_DICDI	Y0010_DICDI	Q54ZX7_DICDI	Q54VX1_DICDI	Q54DS6_DICDI	Q54DK9_DICDI
biological_process	GO:0022607	cellular component assembly	9	14	0.642857	0.974026	0.0321853	1	1	Q54F41_DICDI	Q54DS6_DICDI	Q54YF3_DICDI	Q54DN5_DICDI	Q55CT2_DICDI	Q54NT2_DICDI	Q86HT7_DICDI	Q55BK2_DICDI	Q556K1_DICDI
biological_process	GO:0032259	methylation	8	45	0.177778	0.042045	0.973092	1	1	DMTA_DICDI	MET23_DICDI	NDUF5_DICDI	RRP8_DICDI	Y4059_DICDI	Q54NV3_DICDI	Q54LH3_DICDI	Q54DG6_DICDI
biological_process	GO:0031589	cell-substrate adhesion	8	31	0.258065	0.180799	0.899349	1	1	PHG2_DICDI	IFKA_DICDI	COROB_DICDI	PAXB_DICDI	RGAP1_DICDI	GBPD_DICDI	DYNB_DICDI	Q75JH9_DICDI
biological_process	GO:0050920	regulation of chemotaxis	8	17	0.470588	0.955038	0.0796863	1	1	PI3K2_DICDI	PI3K3_DICDI	PK2_DICDI	GBPD_DICDI	Q55FX5_DICDI	Q551V8_DICDI	Q54S78_DICDI	Q54F55_DICDI
biological_process	GO:0033298	contractile vacuole organization	8	22	0.363636	0.802756	0.343345	1	1	LVSA_DICDI	LVSD_DICDI	MGP1_DICDI	MGP2_DICDI	AP1B_DICDI	Q75JG4_DICDI	Q54Y50_DICDI	Q8I7P3_DICDI
biological_process	GO:0106070	regulation of adenylate cyclase-activating G protein-coupled receptor signaling pathway	8	16	0.5	0.96475	0.0896726	1	1	ADCB_DICDI	PKS1_DICDI	KAPC_DICDI	HBX9_DICDI	GEFB_DICDI	GEFM_DICDI	ADCC_DICDI	Q54L33_DICDI
biological_process	GO:0006890	retrograde vesicle-mediated transport, Golgi to endoplasmic reticulum	8	19	0.421053	0.910327	0.191893	1	1	COPA_DICDI	COG7_DICDI	COPB2_DICDI	Q55CJ0_DICDI	Q54YV5_DICDI	Q54LH0_DICDI	Q54LB2_DICDI	Q54YZ1_DICDI
biological_process	GO:0006506	GPI anchor biosynthetic process	8	22	0.363636	0.88917	0.203595	1	1	PIGW_DICDI	Q54WP5_DICDI	Q551Y7_DICDI	Q54QB2_DICDI	Q54WY9_DICDI	Q1ZXB4_DICDI	Q86I62_DICDI	Q55DR4_DICDI
biological_process	GO:0006260	DNA replication	8	23	0.347826	0.93166	0.103789	1	1	RTPR_DICDI	RIR1_DICDI	KIN17_DICDI	DNLI4_DICDI	Q54MD0_DICDI	Q55FJ4_DICDI	Q1ZXG5_DICDI	Q54Z42_DICDI
biological_process	GO:0098609	cell-cell adhesion	8	35	0.228571	0.1387	0.919821	1	1	IFKA_DICDI	FRMC_DICDI	Y1806_DICDI	DYNB_DICDI	DTFA_DICDI	ACTNB_DICDI	Q55CT4_DICDI	Q75JM8_DICDI
biological_process	GO:0031145	anaphase-promoting complex-dependent catabolic process	8	16	0.5	0.972279	0.0792085	1	1	APC4_DICDI	APC5_DICDI	CDH1_DICDI	CDC23_DICDI	APC2_DICDI	APC3_DICDI	APC1_DICDI	CDC26_DICDI
biological_process	GO:0006629	lipid metabolic process	8	45	0.177778	0.00490239	0.996493	0.781	1	Y1320_DICDI	Q54IR3_DICDI	Q54K07_DICDI	Q54JJ8_DICDI	Q54B77_DICDI	Q55D81_DICDI	Q54HM9_DICDI	Q54GX3_DICDI
biological_process	GO:0006378	mRNA polyadenylation	8	14	0.571429	0.99599	0.0165155	1	1	CPSF2_DICDI	CLP1_DICDI	Q55CA3_DICDI	C7G084_DICDI	Q55DZ3_DICDI	Q54IF1_DICDI	Q54WL8_DICDI	Q54TS6_DICDI
biological_process	GO:0016075	rRNA catabolic process	8	16	0.5	0.948243	0.120695	1	1	Q558Y5_DICDI	Q55E25_DICDI	Q55BB0_DICDI	Q55FS1_DICDI	Q54K15_DICDI	Q55FB1_DICDI	Q75JF5_DICDI	Q95ZG5_DICDI
biological_process	GO:0007005	mitochondrion organization	7	19	0.368421	0.710274	0.360681	1	1	LONM1_DICDI	FTSZA_DICDI	ABKD_DICDI	DYNA_DICDI	ABKB_DICDI	Q54HH1_DICDI	Q54BV1_DICDI
biological_process	GO:0007163	establishment or maintenance of cell polarity	7	35	0.2	0.260949	0.827626	1	1	PAKB_DICDI	DBNL_DICDI	PAKA_DICDI	RGAP1_DICDI	GBPD_DICDI	DYNA_DICDI	Q54PT8_DICDI
biological_process	GO:0043408	regulation of MAPK cascade	7	11	0.636364	0.992837	0.0188221	1	1	PAKB_DICDI	PAKA_DICDI	PAKH_DICDI	PAKD_DICDI	STK4L_DICDI	PAKG_DICDI	DST3_DICDI
biological_process	GO:0042331	phototaxis	7	16	0.4375	0.913699	0.167151	1	1	MGP1_DICDI	GNRA_DICDI	NDUF5_DICDI	ROCO4_DICDI	MGP2_DICDI	Q54JS2_DICDI	Q86KG9_DICDI
biological_process	GO:0032956	regulation of actin cytoskeleton organization	7	32	0.21875	0.197792	0.854186	1	1	GAPA_DICDI	GACII_DICDI	GACG_DICDI	SVKA_DICDI	QKGA_DICDI	Q54DS6_DICDI	Q54I34_DICDI
biological_process	GO:0009653	anatomical structure morphogenesis	7	9	0.777778	0.595906	0.464846	1	1	SPLA_DICDI	MKKA_DICDI	SPNA_DICDI	YELA_DICDI	DGKA_DICDI	ALIX_DICDI	Q54FA3_DICDI
biological_process	GO:0072583	clathrin-dependent endocytosis	7	11	0.636364	0.995348	0.0231192	1	1	MGP1_DICDI	AP2A2_DICDI	Y1676_DICDI	CLH_DICDI	Q8T867_DICDI	Q54Y50_DICDI	C7FZZ0_DICDI
biological_process	GO:0045292	mRNA cis splicing, via spliceosome	7	14	0.5	0.996427	0.013839	1	1	CWC2_DICDI	NCBP2_DICDI	SF3A1_DICDI	Q54TQ2_DICDI	Q86AS4_DICDI	Q55BL6_DICDI	Q54QY2_DICDI
biological_process	GO:0051056	regulation of small GTPase mediated signal transduction	7	11	0.636364	0.924662	0.12941	1	1	Y1809_DICDI	Y1806_DICDI	RGAP1_DICDI	Q54VB2_DICDI	Q54RT1_DICDI	Q869V0_DICDI	Q54RS9_DICDI
biological_process	GO:0005975	carbohydrate metabolic process	6	62	0.0967742	3.47287e-06	0.999999	0.001	1	BGAL1_DICDI	UGT52_DICDI	Q55EQ6_DICDI	Q54M58_DICDI	Q54GR4_DICDI	Q55BX2_DICDI
biological_process	GO:0042742	defense response to bacterium	6	29	0.206897	0.358184	0.75687	1	1	TIRA_DICDI	NRAM2_DICDI	NOXC_DICDI	ATG1_DICDI	ATG7_DICDI	ERK1_DICDI
biological_process	GO:0036092	phosphatidylinositol-3-phosphate biosynthetic process	6	8	0.75	0.998605	0.0120354	1	1	PI3K2_DICDI	PI3K3_DICDI	Q55FX5_DICDI	Q54UU9_DICDI	Q54S78_DICDI	Q54F55_DICDI
biological_process	GO:0006970	response to osmotic stress	6	16	0.375	0.297334	0.77438	1	1	STATC_DICDI	STK11_DICDI	LVSB_DICDI	SPKA_DICDI	PTP3_DICDI	CLH_DICDI
biological_process	GO:0000160	phosphorelay signal transduction system	6	9	0.666667	0.995379	0.0268633	1	1	CYAD_DICDI	DHKM_DICDI	DOKA_DICDI	Q55CH1_DICDI	Q55FP2_DICDI	Q54EN9_DICDI
biological_process	GO:0030837	negative regulation of actin filament polymerization	6	11	0.545455	0.559866	0.606094	1	1	PDE5_DICDI	GAPA_DICDI	TSUA_DICDI	Y7875_DICDI	RGAP1_DICDI	ELMOA_DICDI
biological_process	GO:0006952	defense response	6	9	0.666667	0.518391	0.599488	1	1	STATC_DICDI	TIRA_DICDI	STATB_DICDI	STATA_DICDI	NOXC_DICDI	Q86I20_DICDI
biological_process	GO:0006979	response to oxidative stress	6	31	0.193548	0.0392306	0.978764	1	1	STATC_DICDI	STK11_DICDI	GAPA_DICDI	ADCA_DICDI	YAKA_DICDI	Q86AD8_DICDI
biological_process	GO:0032456	endocytic recycling	6	12	0.5	0.946535	0.138303	1	1	VP35L_DICDI	Q54ST5_DICDI	Q86HF6_DICDI	Q54UN7_DICDI	Q54NV0_DICDI	Q54MU4_DICDI
biological_process	GO:0043520	regulation of myosin II filament assembly	6	15	0.4	0.920791	0.184266	1	1	GAPA_DICDI	HD_DICDI	RIP3_DICDI	Y7875_DICDI	RGAP1_DICDI	GEFQ_DICDI
biological_process	GO:0032436	positive regulation of proteasomal ubiquitin-dependent protein catabolic process	6	21	0.285714	0.602394	0.576333	1	1	Q54LZ6_DICDI	Q86I15_DICDI	Q54F86_DICDI	Q54DM8_DICDI	Q54QC7_DICDI	Q550K3_DICDI
biological_process	GO:0016236	macroautophagy	6	12	0.5	0.96816	0.0610233	1	1	BECNA_DICDI	VP13C_DICDI	VPS15_DICDI	ATG1_DICDI	ATG7_DICDI	Q54LI4_DICDI
biological_process	GO:0016573	histone acetylation	6	13	0.461538	0.987277	0.0342935	1	1	TRA1_DICDI	Y0777_DICDI	EAF3_DICDI	Q54R05_DICDI	Q54C28_DICDI	Q54JZ0_DICDI
biological_process	GO:0045324	late endosome to vacuole transport	6	12	0.5	0.971248	0.0726696	1	1	BECNA_DICDI	BECNB_DICDI	VP13C_DICDI	VPS15_DICDI	CHMP7_DICDI	Q54EK0_DICDI
biological_process	GO:0007155	cell adhesion	6	35	0.171429	0.071175	0.954187	1	1	LVSA_DICDI	LIMB_DICDI	Q54SQ4_DICDI	Q54VU2_DICDI	Q54LN5_DICDI	Q55FW9_DICDI
biological_process	GO:0043967	histone H4 acetylation	6	8	0.75	0.995379	0.0268633	1	1	MYBY_DICDI	EAF3_DICDI	Q54M87_DICDI	Q54IH7_DICDI	Q54UQ7_DICDI	Q54SJ7_DICDI
biological_process	GO:0000290	deadenylation-dependent decapping of nuclear-transcribed mRNA	6	8	0.75	0.998605	0.0120354	1	1	Y5091_DICDI	Q54QJ4_DICDI	Q54KM1_DICDI	Q55F60_DICDI	Q54R87_DICDI	Q557E3_DICDI
biological_process	GO:0030488	tRNA methylation	6	21	0.285714	0.32489	0.818269	1	1	Y3380_DICDI	CMT1_DICDI	Q54HW4_DICDI	Q54XF8_DICDI	Q553Q9_DICDI	Q54N52_DICDI
biological_process	GO:0018107	peptidyl-threonine phosphorylation	6	11	0.545455	0.958867	0.123852	1	1	MHCKC_DICDI	YAKA_DICDI	Y6481_DICDI	Y0444_DICDI	MHCKA_DICDI	DYRK1_DICDI
biological_process	GO:0006334	nucleosome assembly	6	16	0.375	0.957931	0.0981696	1	1	H2BV2_DICDI	NAP1_DICDI	Q54JS6_DICDI	Q55A48_DICDI	Q54YF1_DICDI	Q55D32_DICDI
biological_process	GO:0006486	protein glycosylation	6	29	0.206897	0.00545792	0.997801	0.796	1	Q86J24_DICDI	Q54RA6_DICDI	Q55EK3_DICDI	Q54W89_DICDI	Q55AK1_DICDI	Q54X66_DICDI
biological_process	GO:0032508	DNA duplex unwinding	6	9	0.666667	0.861697	0.289684	1	1	RAD50_DICDI	Q54DM3_DICDI	Q55FJ4_DICDI	Q54RN8_DICDI	Q54Z42_DICDI	B0G0Y4_DICDI
biological_process	GO:0007076	mitotic chromosome condensation	6	8	0.75	0.998605	0.0120354	1	1	SMC4_DICDI	Q54TZ8_DICDI	Q86I09_DICDI	Q54WY1_DICDI	Q54B17_DICDI	Q54DR4_DICDI
biological_process	GO:0034198	cellular response to amino acid starvation	6	8	0.75	0.995379	0.0268633	1	1	IMPCT_DICDI	Y9099_DICDI	GCN1_DICDI	Q54NW3_DICDI	Q54UN5_DICDI	Q54Y15_DICDI
biological_process	GO:0031123	RNA 3'-end processing	6	12	0.5	0.99272	0.0141047	1	1	C7G070_DICDI	Q54Y43_DICDI	Q54TZ1_DICDI	Q555M9_DICDI	Q54LG7_DICDI	Q54JH7_DICDI
biological_process	GO:0045332	phospholipid translocation	6	10	0.6	0.995348	0.0231192	1	1	Q551T0_DICDI	Q55E61_DICDI	Q54L55_DICDI	Q86H52_DICDI	Q551P7_DICDI	Q54RS1_DICDI
biological_process	GO:0000902	cell morphogenesis	5	22	0.227273	0.0348922	0.984505	1	1	PHG2_DICDI	TBCC_DICDI	PIRA_DICDI	Q553W1_DICDI	Q55GV6_DICDI
biological_process	GO:0007186	G protein-coupled receptor signaling pathway	5	20	0.25	0.866711	0.187482	1	1	PI3K2_DICDI	SPNA_DICDI	Y9625_DICDI	ERK1_DICDI	Q8T183_DICDI
biological_process	GO:0044351	macropinocytosis	5	17	0.294118	0.756917	0.381325	1	1	PI3K2_DICDI	APH1_DICDI	Q55FX5_DICDI	Q86KX8_DICDI	Q55CR5_DICDI
biological_process	GO:0031269	pseudopodium assembly	5	13	0.384615	0.948243	0.120695	1	1	PI3K2_DICDI	DBNL_DICDI	PTEN_DICDI	PIRA_DICDI	Q7KWP7_DICDI
biological_process	GO:0031153	slug development involved in sorocarp development	5	16	0.3125	0.647065	0.563768	1	1	GRLJ_DICDI	HBX4_DICDI	ERK1_DICDI	Q54RA9_DICDI	Q553M8_DICDI
biological_process	GO:0019934	cGMP-mediated signaling	5	10	0.5	0.901288	0.229131	1	1	PDE3_DICDI	PDE5_DICDI	PDE6_DICDI	GBPD_DICDI	Q551V8_DICDI
biological_process	GO:0034260	negative regulation of GTPase activity	5	9	0.555556	0.973137	0.103455	1	1	PDE5_DICDI	PAKD_DICDI	Y1806_DICDI	NDRC_DICDI	KAPC_DICDI
biological_process	GO:0006298	mismatch repair	5	15	0.333333	0.709383	0.480187	1	1	MSH3_DICDI	MSH6_DICDI	MSH2_DICDI	PMS1_DICDI	MLH1_DICDI
biological_process	GO:0032465	regulation of cytokinesis	5	10	0.5	0.888907	0.235486	1	1	PLK_DICDI	Y6689_DICDI	Y4579_DICDI	QKGA_DICDI	Q54BR8_DICDI
biological_process	GO:0002098	tRNA wobble uridine modification	5	18	0.277778	0.401346	0.774326	1	1	ELP4_DICDI	ELP2_DICDI	Q54D70_DICDI	Q54HW4_DICDI	Q54Q66_DICDI
biological_process	GO:0043409	negative regulation of MAPK cascade	5	6	0.833333	0.995379	0.0268633	1	1	MPL2_DICDI	MPL3_DICDI	MPL1_DICDI	DUSPR_DICDI	Q8T813_DICDI
biological_process	GO:0042273	ribosomal large subunit biogenesis	5	22	0.227273	0.00889027	0.996557	0.92	1	NVL_DICDI	WDR12_DICDI	Q55GH7_DICDI	Q86HD4_DICDI	Q54P34_DICDI
biological_process	GO:0030833	regulation of actin filament polymerization	5	22	0.227273	0.184161	0.877003	1	1	DBNL_DICDI	Y1197_DICDI	PIRA_DICDI	B0G198_DICDI	Q7KWP7_DICDI
biological_process	GO:0043326	chemotaxis to folate	5	22	0.227273	0.29913	0.845372	1	1	GACG_DICDI	PAXB_DICDI	PSRA_DICDI	TSUA_DICDI	Q55AA6_DICDI
biological_process	GO:0045595	regulation of cell differentiation	5	9	0.555556	0.962187	0.0676287	1	1	TAGA_DICDI	GTAA_DICDI	DIMA_DICDI	FBXA_DICDI	DMTA_DICDI
biological_process	GO:0000387	spliceosomal snRNP assembly	5	12	0.416667	0.815734	0.352935	1	1	RU1C_DICDI	DDX20_DICDI	CWC2_DICDI	RUXF_DICDI	Q86AS4_DICDI
biological_process	GO:1904643	response to curcumin	5	16	0.3125	0.647065	0.563768	1	1	PSRA_DICDI	SPHKA_DICDI	YAKA_DICDI	KAPC_DICDI	Q86AD8_DICDI
biological_process	GO:0030010	establishment of cell polarity	5	11	0.454545	0.710316	0.497883	1	1	PAKA_DICDI	PTEN_DICDI	TSUA_DICDI	MYOG_DICDI	Q557I6_DICDI
biological_process	GO:0042244	spore wall assembly	5	10	0.5	0.949893	0.156803	1	1	DCSA_DICDI	SRFA_DICDI	Q1ZXE9_DICDI	Q54Q41_DICDI	Q54GL6_DICDI
biological_process	GO:0033962	P-body assembly	5	9	0.555556	0.973137	0.103455	1	1	DDX6_DICDI	Y5091_DICDI	IF4AX_DICDI	Q54U48_DICDI	Q55F60_DICDI
biological_process	GO:0006446	regulation of translational initiation	5	7	0.714286	0.976881	0.0824926	1	1	IFKA_DICDI	IMPCT_DICDI	IF4G_DICDI	GLE1_DICDI	EIF3K_DICDI
biological_process	GO:0034472	snRNA 3'-end processing	5	8	0.625	0.851147	0.290617	1	1	INT7_DICDI	INT5_DICDI	INT6_DICDI	Q54VK4_DICDI	Q55E08_DICDI
biological_process	GO:0009847	spore germination	5	13	0.384615	0.901288	0.229131	1	1	PPK1_DICDI	ACTNB_DICDI	DHKC_DICDI	Q1ZXE9_DICDI	Q54C46_DICDI
biological_process	GO:0031146	SCF-dependent proteasomal ubiquitin-dependent protein catabolic process	5	15	0.333333	0.710316	0.497883	1	1	Q54FA1_DICDI	Q54PH6_DICDI	Q54E47_DICDI	Q54KC6_DICDI	Q54MH7_DICDI
biological_process	GO:0006400	tRNA modification	5	23	0.217391	0.132509	0.915009	1	1	SYAM_DICDI	Q54GN1_DICDI	Q54X76_DICDI	Q54QJ2_DICDI	Q54WD4_DICDI
biological_process	GO:0006303	double-strand break repair via nonhomologous end joining	5	11	0.454545	0.972279	0.0792085	1	1	KU70_DICDI	PRKDC_DICDI	XRCC5_DICDI	DNLI4_DICDI	Q86H44_DICDI
biological_process	GO:0010737	protein kinase A signaling	5	5	1	0.998605	0.0120354	1	1	BZPF_DICDI	BZPR_DICDI	BZPG_DICDI	KAPC_DICDI	Q54K15_DICDI
biological_process	GO:0048102	autophagic cell death	5	7	0.714286	0.995945	0.0303612	1	1	IPLA_DICDI	GBF_DICDI	STLB_DICDI	DHKM_DICDI	ATG1_DICDI
biological_process	GO:0042254	ribosome biogenesis	5	11	0.454545	0.0019608	0.998843	0.45	1	DDX31_DICDI	NVL_DICDI	Q553S0_DICDI	Q54X21_DICDI	Q75JJ6_DICDI
biological_process	GO:0006270	DNA replication initiation	5	13	0.384615	0.709383	0.480187	1	1	ORC5_DICDI	ORC3_DICDI	ORC6_DICDI	Q54X69_DICDI	Q54BH3_DICDI
biological_process	GO:0006369	termination of RNA polymerase II transcription	5	12	0.416667	0.876148	0.286498	1	1	MED18_DICDI	Q54HF4_DICDI	Q55EG2_DICDI	Q55DZ3_DICDI	Q54WL8_DICDI
biological_process	GO:0008154	actin polymerization or depolymerization	5	8	0.625	0.290546	0.77618	1	1	GNRA_DICDI	VILD_DICDI	Q551I6_DICDI	Q54EF8_DICDI	Q54S11_DICDI
biological_process	GO:0030162	regulation of proteolysis	5	8	0.625	0.874626	0.207106	1	1	BZPE_DICDI	Q54WU7_DICDI	Q54D90_DICDI	Q75JX9_DICDI	Q54QP3_DICDI
biological_process	GO:0000712	resolution of meiotic recombination intermediates	5	12	0.416667	0.876148	0.286498	1	1	XPF_DICDI	Q54QB8_DICDI	Q556X5_DICDI	Q54II7_DICDI	Q54PQ3_DICDI
biological_process	GO:0000079	regulation of cyclin-dependent protein serine/threonine kinase activity	5	13	0.384615	0.770869	0.428483	1	1	Q54VE1_DICDI	Q75K08_DICDI	Q54I13_DICDI	C7G050_DICDI	Q75J86_DICDI
biological_process	GO:0007029	endoplasmic reticulum organization	5	9	0.555556	0.808107	0.348205	1	1	SEY1_DICDI	SEC31_DICDI	IREA_DICDI	Q8T2J5_DICDI	Q556P7_DICDI
biological_process	GO:0034727	piecemeal microautophagy of the nucleus	5	8	0.625	0.987965	0.0609041	1	1	ATG17_DICDI	ATG7_DICDI	Q8MMZ9_DICDI	Q54T12_DICDI	Q55BY0_DICDI
biological_process	GO:0017148	negative regulation of translation	5	19	0.263158	0.793492	0.306787	1	1	Q54B26_DICDI	Q553Y8_DICDI	Q86AP3_DICDI	Q54U17_DICDI	Q54WA7_DICDI
biological_process	GO:0071596	ubiquitin-dependent protein catabolic process via the N-end rule pathway	5	8	0.625	0.987965	0.0609041	1	1	Q54QZ3_DICDI	Q54DM4_DICDI	Q75JM9_DICDI	Q54IW6_DICDI	Q54DM5_DICDI
biological_process	GO:0032147	activation of protein kinase activity	4	6	0.666667	0.958867	0.123852	1	1	PDPKA_DICDI	PI3K2_DICDI	Y7588_DICDI	ATG17_DICDI
biological_process	GO:1905303	positive regulation of macropinocytosis	4	9	0.444444	0.896545	0.279142	1	1	PDPKA_DICDI	PI3K2_DICDI	PK2_DICDI	GACG_DICDI
biological_process	GO:0051591	response to cAMP	4	18	0.222222	0.319409	0.844388	1	1	PI3K2_DICDI	PHS2_DICDI	RGAP1_DICDI	Q86AD8_DICDI
biological_process	GO:0051602	response to electrical stimulus	4	9	0.444444	0.896545	0.279142	1	1	PI3K2_DICDI	PK2_DICDI	RIP3_DICDI	Q551V8_DICDI
biological_process	GO:0030242	autophagy of peroxisome	4	6	0.666667	0.988429	0.0734842	1	1	VPS15_DICDI	ATG17_DICDI	Q8MMZ9_DICDI	Q54CV2_DICDI
biological_process	GO:0042127	regulation of cell population proliferation	4	6	0.666667	0.990988	0.0337585	1	1	STATC_DICDI	STATB_DICDI	STATA_DICDI	Q86I20_DICDI
biological_process	GO:0009408	response to heat	4	12	0.333333	0.808107	0.348205	1	1	STATC_DICDI	DNJA1_DICDI	ADCA_DICDI	Q54SQ0_DICDI
biological_process	GO:0030866	cortical actin cytoskeleton organization	4	21	0.190476	0.494699	0.67511	1	1	FORE_DICDI	FORC_DICDI	COROB_DICDI	GEFB_DICDI
biological_process	GO:0007265	Ras protein signal transduction	4	20	0.2	0.199143	0.872021	1	1	PHR_DICDI	GEFB_DICDI	GEFQ_DICDI	GEFR_DICDI
biological_process	GO:0051270	regulation of cellular component movement	4	5	0.8	0.96475	0.0896726	1	1	MGP1_DICDI	MPL1_DICDI	MGP2_DICDI	RGAP1_DICDI
biological_process	GO:0051123	RNA polymerase II preinitiation complex assembly	4	9	0.444444	0.843197	0.360702	1	1	TAF1_DICDI	TAF12_DICDI	NC2B_DICDI	Q55BH6_DICDI
biological_process	GO:0006874	cellular calcium ion homeostasis	4	11	0.363636	0.458898	0.730408	1	1	LVSA_DICDI	Q55CI7_DICDI	Q54CD1_DICDI	Q54YQ8_DICDI
biological_process	GO:0032968	positive regulation of transcription elongation from RNA polymerase II promoter	4	7	0.571429	0.969639	0.130982	1	1	T2FA_DICDI	Q55A48_DICDI	Q555G9_DICDI	Q556Z2_DICDI
biological_process	GO:0006368	transcription elongation from RNA polymerase II promoter	4	14	0.285714	0.976492	0.059084	1	1	Q55A48_DICDI	Q555G9_DICDI	Q54K42_DICDI	Q556Z2_DICDI
biological_process	GO:0006605	protein targeting	4	8	0.5	0.445744	0.64122	1	1	SNF8_DICDI	VPS36_DICDI	AP4M_DICDI	Q54EQ0_DICDI
biological_process	GO:0050765	negative regulation of phagocytosis	4	14	0.285714	0.571517	0.656829	1	1	DBNL_DICDI	PAXB_DICDI	RIP3_DICDI	DRKD_DICDI
biological_process	GO:0051896	regulation of protein kinase B signaling	4	8	0.5	0.826763	0.357286	1	1	PTEN_DICDI	CNRN_DICDI	Q553B4_DICDI	Q54L33_DICDI
biological_process	GO:0007040	lysosome organization	4	10	0.4	0.304814	0.824517	1	1	LVSB_DICDI	WASC5_DICDI	Q54WI0_DICDI	Q54RP3_DICDI
biological_process	GO:0000422	autophagy of mitochondrion	4	15	0.266667	0.709383	0.480187	1	1	ATG17_DICDI	ATG7_DICDI	Q8MMZ9_DICDI	Q54T12_DICDI
biological_process	GO:0044805	late nucleophagy	4	7	0.571429	0.969639	0.130982	1	1	ATG17_DICDI	ATG7_DICDI	Q8MMZ9_DICDI	Q54T12_DICDI
biological_process	GO:0034063	stress granule assembly	4	5	0.8	0.997419	0.0322087	1	1	DDX6_DICDI	IF4AX_DICDI	ATX2_DICDI	Q54U48_DICDI
biological_process	GO:0001732	formation of cytoplasmic translation initiation complex	4	15	0.266667	0.502117	0.714628	1	1	EIF3E_DICDI	EIF3L_DICDI	EIF3C_DICDI	EIF3K_DICDI
biological_process	GO:0051085	chaperone cofactor-dependent protein refolding	4	13	0.307692	0.642714	0.591587	1	1	HS7C3_DICDI	HS7C4_DICDI	Y5729_DICDI	Q54TF9_DICDI
biological_process	GO:0042026	protein refolding	4	12	0.333333	0.713502	0.519495	1	1	HS7C3_DICDI	HS7C4_DICDI	Q550Q8_DICDI	Q54EV3_DICDI
biological_process	GO:0008033	tRNA processing	4	24	0.166667	0.027413	0.983809	1	1	Q54EV0_DICDI	Q54QJ2_DICDI	Q54WD4_DICDI	Q54HY6_DICDI
biological_process	GO:1905345	protein localization to cleavage furrow	4	7	0.571429	0.969639	0.130982	1	1	KIF12_DICDI	GAPA_DICDI	ICPA_DICDI	DYNA_DICDI
biological_process	GO:0045842	positive regulation of mitotic metaphase/anaphase transition	4	9	0.444444	0.896545	0.279142	1	1	APC4_DICDI	APC5_DICDI	CDC23_DICDI	APC3_DICDI
biological_process	GO:0070979	protein K11-linked ubiquitination	4	6	0.666667	0.988429	0.0734842	1	1	APC4_DICDI	APC5_DICDI	APC1_DICDI	CDC26_DICDI
biological_process	GO:0046956	positive phototaxis	4	11	0.363636	0.781271	0.441829	1	1	FORF_DICDI	VILD_DICDI	GEFE_DICDI	GEFL_DICDI
biological_process	GO:0006911	phagocytosis, engulfment	4	13	0.307692	0.0101519	0.997281	0.964	1	LMPA_DICDI	LMPC_DICDI	Q55CR5_DICDI	Q8I7P3_DICDI
biological_process	GO:0070060	'de novo' actin filament nucleation	4	6	0.666667	0.988429	0.0734842	1	1	FORE_DICDI	FORB_DICDI	FORD_DICDI	FORF_DICDI
biological_process	GO:0030968	endoplasmic reticulum unfolded protein response	4	11	0.363636	0.993316	0.0227831	1	1	BZPC_DICDI	DERL2_DICDI	BZPL_DICDI	Q54T38_DICDI
biological_process	GO:0006289	nucleotide-excision repair	4	16	0.25	0.393906	0.75805	1	1	TF2H3_DICDI	TF2H4_DICDI	DPOE1_DICDI	Q54I13_DICDI
biological_process	GO:0046855	inositol phosphate dephosphorylation	4	8	0.5	0.939096	0.201059	1	1	Q54W40_DICDI	Q54PV1_DICDI	Q54D97_DICDI	Q8I7P3_DICDI
biological_process	GO:0007094	mitotic spindle assembly checkpoint signaling	4	6	0.666667	0.988429	0.0734842	1	1	MPS1_DICDI	BUB1_DICDI	Q55CA1_DICDI	Q54JX0_DICDI
biological_process	GO:0006893	Golgi to plasma membrane transport	4	8	0.5	0.781271	0.441829	1	1	CCD93_DICDI	EXOC5_DICDI	EXOC2_DICDI	EXOC4_DICDI
biological_process	GO:0031037	myosin II filament disassembly	4	6	0.666667	0.969639	0.130982	1	1	MHCKC_DICDI	MHCKD_DICDI	MHCKA_DICDI	Q551V8_DICDI
biological_process	GO:0006971	hypotonic response	4	15	0.266667	0.494699	0.67511	1	1	AP2A2_DICDI	HD_DICDI	AP1B_DICDI	Q54Y50_DICDI
biological_process	GO:0007131	reciprocal meiotic recombination	4	10	0.4	0.894883	0.200999	1	1	MSH3_DICDI	RA51D_DICDI	Q54NP1_DICDI	Q55DW8_DICDI
biological_process	GO:0006607	NLS-bearing protein import into nucleus	4	7	0.571429	0.969639	0.130982	1	1	NUP54_DICDI	Q75JH1_DICDI	Q54XC5_DICDI	Q54XH0_DICDI
biological_process	GO:0006413	translational initiation	4	14	0.285714	0.28952	0.819201	1	1	EIF3E_DICDI	EIF3L_DICDI	EIF3C_DICDI	EI2BD_DICDI
biological_process	GO:0072659	protein localization to plasma membrane	4	7	0.571429	0.583003	0.624923	1	1	EPN_DICDI	PIGW_DICDI	Q55DS5_DICDI	Q54GC3_DICDI
biological_process	GO:0006312	mitotic recombination	4	6	0.666667	0.987965	0.0609041	1	1	MSH3_DICDI	Q54KW0_DICDI	Q54QU4_DICDI	Q55E38_DICDI
biological_process	GO:0008285	negative regulation of cell population proliferation	4	7	0.571429	0.969639	0.130982	1	1	BTG_DICDI	PTEN_DICDI	CNRN_DICDI	Q553B4_DICDI
biological_process	GO:0050829	defense response to Gram-negative bacterium	4	9	0.444444	0.896545	0.279142	1	1	FYV1_DICDI	VP13F_DICDI	DRKD_DICDI	Q8I7P3_DICDI
biological_process	GO:0006995	cellular response to nitrogen starvation	4	8	0.5	0.939096	0.201059	1	1	BECNA_DICDI	BECNB_DICDI	ATG1_DICDI	ATG7_DICDI
biological_process	GO:0051568	histone H3-K4 methylation	4	8	0.5	0.949893	0.156803	1	1	NUCMR_DICDI	WDR5_DICDI	Q55AQ4_DICDI	Q55E07_DICDI
biological_process	GO:0006301	postreplication repair	4	7	0.571429	0.710316	0.497883	1	1	MSH2_DICDI	Q55DD5_DICDI	Q54XR0_DICDI	Q54FR5_DICDI
biological_process	GO:0042594	response to starvation	4	8	0.5	0.709027	0.345734	1	1	D7_DICDI	Q54DZ2_DICDI	C7G014_DICDI	Q559F5_DICDI
biological_process	GO:0072718	response to cisplatin	4	8	0.5	0.939096	0.201059	1	1	PRKDC_DICDI	DUSPR_DICDI	Q54B72_DICDI	Q9GV71_DICDI
biological_process	GO:0016575	histone deacetylation	4	9	0.444444	0.896545	0.279142	1	1	EAF3_DICDI	Q54UJ3_DICDI	Q1ZXA2_DICDI	Q54MS4_DICDI
biological_process	GO:0071901	negative regulation of protein serine/threonine kinase activity	4	5	0.8	0.976881	0.0824926	1	1	PSRA_DICDI	PTEN_DICDI	CAR4_DICDI	Q54RX7_DICDI
biological_process	GO:0070816	phosphorylation of RNA polymerase II C-terminal domain	4	8	0.5	0.896545	0.279142	1	1	TF2H3_DICDI	TF2H4_DICDI	CDK7_DICDI	Q556Z2_DICDI
biological_process	GO:0000289	nuclear-transcribed mRNA poly(A) tail shortening	4	5	0.8	0.988429	0.0734842	1	1	PAN3_DICDI	Q55DD5_DICDI	Q55AA8_DICDI	Q54PG2_DICDI
biological_process	GO:0006906	vesicle fusion	4	27	0.148148	0.158525	0.906571	1	1	STX7A_DICDI	STX7B_DICDI	SYBA_DICDI	Q54QH2_DICDI
biological_process	GO:0031272	regulation of pseudopodium assembly	4	5	0.8	0.988429	0.0734842	1	1	SEPA_DICDI	PTEN_DICDI	TSUA_DICDI	QKGA_DICDI
biological_process	GO:0032012	regulation of ARF protein signal transduction	4	6	0.666667	0.988429	0.0734842	1	1	Q54G75_DICDI	Q86KG9_DICDI	Q54FL9_DICDI	Q556T7_DICDI
biological_process	GO:0006998	nuclear envelope organization	4	6	0.666667	0.969639	0.130982	1	1	SUN1_DICDI	Q555Q0_DICDI	Q54C61_DICDI	Q54QQ7_DICDI
biological_process	GO:0000076	DNA replication checkpoint signaling	4	8	0.5	0.958867	0.123852	1	1	Q54D34_DICDI	Q55E62_DICDI	Q54KW8_DICDI	Q869Q1_DICDI
biological_process	GO:0030050	vesicle transport along actin filament	4	12	0.333333	0.713502	0.519495	1	1	MYOB_DICDI	MYOG_DICDI	MYOH_DICDI	MYOJ_DICDI
biological_process	GO:0015743	malate transport	4	5	0.8	0.988429	0.0734842	1	1	Q54R26_DICDI	Q54WC9_DICDI	Q54KP4_DICDI	Q552V8_DICDI
biological_process	GO:0048478	replication fork protection	4	5	0.8	0.997419	0.0322087	1	1	Q54X62_DICDI	Q54TE8_DICDI	Q554U4_DICDI	Q54KW8_DICDI
biological_process	GO:0030422	production of siRNA involved in RNA interference	4	5	0.8	0.997419	0.0322087	1	1	Q54EH7_DICDI	Q7KWS3_DICDI	Q55FS1_DICDI	Q54UI6_DICDI
biological_process	GO:0061952	midbody abscission	3	5	0.6	0.967791	0.168155	1	1	HD_DICDI	PAXB_DICDI	DYNA_DICDI
biological_process	GO:0032148	activation of protein kinase B activity	3	7	0.428571	0.869018	0.36171	1	1	PDPKA_DICDI	PDPKB_DICDI	RIP3_DICDI
biological_process	GO:1904894	positive regulation of receptor signaling pathway via STAT	3	3	1	1	0.0280265	1	1	PHG2_DICDI	PYK3_DICDI	SPLB_DICDI
biological_process	GO:0051489	regulation of filopodium assembly	3	4	0.75	0.998605	0.0120354	1	1	PHG2_DICDI	Q54WI0_DICDI	Q54B43_DICDI
biological_process	GO:0007260	tyrosine phosphorylation of STAT protein	3	3	1	1	0.0280265	1	1	PHG2_DICDI	PYK3_DICDI	SPLB_DICDI
biological_process	GO:0001845	phagolysosome assembly	3	6	0.5	0.269592	0.874783	1	1	PI3K2_DICDI	LVSB_DICDI	LMPA_DICDI
biological_process	GO:0090382	phagosome maturation	3	9	0.333333	0.675721	0.465288	1	1	PI3K2_DICDI	DBNL_DICDI	DYHC_DICDI
biological_process	GO:0031000	response to caffeine	3	8	0.375	0.798941	0.4581	1	1	PDE4_DICDI	CYAD_DICDI	TBC5B_DICDI
biological_process	GO:0072697	protein localization to cell cortex	3	4	0.75	0.869018	0.36171	1	1	PDE5_DICDI	PDE6_DICDI	MP2K1_DICDI
biological_process	GO:0110094	polyphosphate-mediated signaling	3	7	0.428571	0.869018	0.36171	1	1	PK2_DICDI	PAKD_DICDI	ERK1_DICDI
biological_process	GO:0051298	centrosome duplication	3	3	1	0.995945	0.0303612	1	1	MTAA_DICDI	DYIN_DICDI	Q7KWK7_DICDI
biological_process	GO:0016126	sterol biosynthetic process	3	18	0.166667	0.0233717	0.99405	0.999	1	UGT52_DICDI	KIME_DICDI	HMDH1_DICDI
biological_process	GO:0016226	iron-sulfur cluster assembly	3	18	0.166667	0.225674	0.899897	1	1	MMS19_DICDI	W1002_DICDI	DRE2_DICDI
biological_process	GO:0050766	positive regulation of phagocytosis	3	12	0.25	0.285372	0.87996	1	1	PAKB_DICDI	GEFB_DICDI	Q54VB2_DICDI
biological_process	GO:1902463	protein localization to cell leading edge	3	3	1	1	0.0280265	1	1	PAKB_DICDI	HD_DICDI	Q54GR0_DICDI
biological_process	GO:0045165	cell fate commitment	3	3	1	0.939096	0.201059	1	1	RBLA_DICDI	TRIA_DICDI	BTG_DICDI
biological_process	GO:0043052	thermotaxis	3	7	0.428571	0.869018	0.36171	1	1	GEFE_DICDI	GEFL_DICDI	Q54JS2_DICDI
biological_process	GO:0016042	lipid catabolic process	3	13	0.230769	0.00363902	0.998579	0.683	1	PLDC_DICDI	PLDA_DICDI	Q54Q49_DICDI
biological_process	GO:0006261	DNA-dependent DNA replication	3	15	0.2	0.682378	0.420683	1	1	WRIP1_DICDI	Q54S42_DICDI	Q86IV6_DICDI
biological_process	GO:0032543	mitochondrial translation	3	17	0.176471	0.0835356	0.969875	1	1	SYIM_DICDI	SYLM_DICDI	Q55FH5_DICDI
biological_process	GO:0000395	mRNA 5'-splice site recognition	3	3	1	1	0.0280265	1	1	RU1C_DICDI	Q54SW0_DICDI	Q54R91_DICDI
biological_process	GO:0007031	peroxisome organization	3	14	0.214286	0.534887	0.652071	1	1	PEX16_DICDI	PEX2_DICDI	PEX1_DICDI
biological_process	GO:0046513	ceramide biosynthetic process	3	9	0.333333	0.639298	0.627669	1	1	SGMA_DICDI	SGMB_DICDI	Q54B63_DICDI
biological_process	GO:0051028	mRNA transport	3	10	0.3	0.97759	0.0459764	1	1	NUP54_DICDI	NUP98_DICDI	Q75JH1_DICDI
biological_process	GO:0043328	protein transport to vacuole involved in ubiquitin-dependent protein catabolic process via the multivesicular body sorting pathway	3	5	0.6	0.967791	0.168155	1	1	SNF8_DICDI	TOM1_DICDI	VPS36_DICDI
biological_process	GO:0055088	lipid homeostasis	3	15	0.2	0.235086	0.906509	1	1	ABKD_DICDI	ABKB_DICDI	Q555Q0_DICDI
biological_process	GO:0008333	endosome to lysosome transport	3	8	0.375	0.798941	0.4581	1	1	STX7A_DICDI	CL16A_DICDI	Q54RP3_DICDI
biological_process	GO:0007189	adenylate cyclase-activating G protein-coupled receptor signaling pathway	3	14	0.214286	0.987251	0.0252486	1	1	CRLC_DICDI	RCKA_DICDI	CAR4_DICDI
biological_process	GO:0006955	immune response	3	18	0.166667	0.122944	0.925981	1	1	Q55GS9_DICDI	Q555H5_DICDI	Q54BH0_DICDI
biological_process	GO:0007041	lysosomal transport	3	6	0.5	0.956662	0.111093	1	1	LVSB_DICDI	CLH_DICDI	Q54WI0_DICDI
biological_process	GO:0051490	negative regulation of filopodium assembly	3	3	1	1	0.0280265	1	1	MGP1_DICDI	PAKD_DICDI	MGP2_DICDI
biological_process	GO:0016050	vesicle organization	3	7	0.428571	0.87323	0.171891	1	1	MGP1_DICDI	Y1676_DICDI	C7FZZ0_DICDI
biological_process	GO:0006744	ubiquinone biosynthetic process	3	20	0.15	0.0672713	0.976628	1	1	COQ9_DICDI	DPS1_DICDI	COQ2_DICDI
biological_process	GO:0030705	cytoskeleton-dependent intracellular transport	3	4	0.75	0.957931	0.0981696	1	1	KIF7_DICDI	KIF1_DICDI	KIF3_DICDI
biological_process	GO:0012501	programmed cell death	3	7	0.428571	0.981178	0.0439719	1	1	DIMA_DICDI	STK4L_DICDI	DST3_DICDI
biological_process	GO:0007091	metaphase/anaphase transition of mitotic cell cycle	3	7	0.428571	0.993316	0.0227831	1	1	CDC23_DICDI	APC3_DICDI	APC1_DICDI
biological_process	GO:0046689	response to mercury ion	3	18	0.166667	0.155612	0.944267	1	1	WDR12_DICDI	Q54HE3_DICDI	Q54UQ7_DICDI
biological_process	GO:0090383	phagosome acidification	3	3	1	1	0.0280265	1	1	LMPA_DICDI	FYV1_DICDI	DYNA_DICDI
biological_process	GO:0044655	phagosome reneutralization	3	6	0.5	0.926516	0.262826	1	1	LMPA_DICDI	WASC5_DICDI	MYOB_DICDI
biological_process	GO:0008299	isoprenoid biosynthetic process	3	7	0.428571	0.085504	0.965875	1	1	DPS1_DICDI	COQ2_DICDI	HMDH1_DICDI
biological_process	GO:0051639	actin filament network formation	3	8	0.375	0.798941	0.4581	1	1	FORC_DICDI	Q54XX0_DICDI	Q55C43_DICDI
biological_process	GO:0060176	regulation of aggregation involved in sorocarp development	3	11	0.272727	0.13465	0.928576	1	1	GTAC_DICDI	HD_DICDI	TSUA_DICDI
biological_process	GO:0044773	mitotic DNA damage checkpoint signaling	3	5	0.6	0.983484	0.0534648	1	1	FHKB_DICDI	FHKC_DICDI	Q54X62_DICDI
biological_process	GO:0016973	poly(A)+ mRNA export from nucleus	3	10	0.3	0.639298	0.627669	1	1	GLE1_DICDI	Q55GW5_DICDI	Q54KA3_DICDI
biological_process	GO:0009992	cellular water homeostasis	3	6	0.5	0.926516	0.262826	1	1	AP2A2_DICDI	Q54Y50_DICDI	C7FZZ0_DICDI
biological_process	GO:0036228	protein localization to nuclear inner membrane	3	3	1	1	0.0280265	1	1	NUP54_DICDI	Q54F20_DICDI	Q54XC5_DICDI
biological_process	GO:0033314	mitotic DNA replication checkpoint signaling	3	6	0.5	0.926516	0.262826	1	1	Q54D34_DICDI	Q54X62_DICDI	Q54X69_DICDI
biological_process	GO:0000083	regulation of transcription involved in G1/S transition of mitotic cell cycle	3	4	0.75	0.991494	0.0865873	1	1	Y2550_DICDI	Y8487_DICDI	Y4007_DICDI
biological_process	GO:0031287	positive regulation of sorocarp stalk cell differentiation	3	4	0.75	0.991494	0.0865873	1	1	DIMA_DICDI	GTAG_DICDI	DIMB_DICDI
biological_process	GO:0009736	cytokinin-activated signaling pathway	3	4	0.75	0.991494	0.0865873	1	1	CYAD_DICDI	DHKA_DICDI	DHKB_DICDI
biological_process	GO:0043405	regulation of MAP kinase activity	3	4	0.75	0.815734	0.352935	1	1	ADCB_DICDI	KAPC_DICDI	ADCC_DICDI
biological_process	GO:0000463	maturation of LSU-rRNA from tricistronic rRNA transcript (SSU-rRNA, 5.8S rRNA, LSU-rRNA)	3	13	0.230769	0.343171	0.846893	1	1	PESC_DICDI	WDR12_DICDI	Q54RN6_DICDI
biological_process	GO:0030835	negative regulation of actin filament depolymerization	3	4	0.75	0.826763	0.357286	1	1	COROB_DICDI	PIRA_DICDI	CNRN_DICDI
biological_process	GO:0048268	clathrin coat assembly	3	4	0.75	0.991494	0.0865873	1	1	CLH_DICDI	Q1ZXE9_DICDI	Q54Y50_DICDI
biological_process	GO:0000245	spliceosomal complex assembly	3	5	0.6	0.988633	0.0501071	1	1	CRNL1_DICDI	SKY1_DICDI	Q54XH4_DICDI
biological_process	GO:0045727	positive regulation of translation	3	4	0.75	0.826763	0.357286	1	1	Q54DH9_DICDI	Q550L4_DICDI	Q54HN9_DICDI
biological_process	GO:0031285	regulation of sorocarp stalk cell differentiation	3	8	0.375	0.956662	0.111093	1	1	MRFA_DICDI	SRFC_DICDI	KAPC_DICDI
biological_process	GO:0001510	RNA methylation	3	8	0.375	0.150294	0.916356	1	1	Q55DF6_DICDI	Q55G09_DICDI	Q54TL4_DICDI
biological_process	GO:0007021	tubulin complex assembly	3	6	0.5	0.926516	0.262826	1	1	TBCC_DICDI	TBCD_DICDI	TBCE_DICDI
biological_process	GO:0043619	regulation of transcription from RNA polymerase II promoter in response to oxidative stress	3	3	1	1	0.0280265	1	1	D7_DICDI	Q54DZ2_DICDI	C7G014_DICDI
biological_process	GO:0016540	protein autoprocessing	3	5	0.6	0.967791	0.168155	1	1	MRFA_DICDI	Y9218_DICDI	Y3934_DICDI
biological_process	GO:0006487	protein N-linked glycosylation	3	25	0.12	0.0130296	0.996407	0.988	1	ALG8_DICDI	Q54LK1_DICDI	Q559V4_DICDI
biological_process	GO:0000466	maturation of 5.8S rRNA from tricistronic rRNA transcript (SSU-rRNA, 5.8S rRNA, LSU-rRNA)	3	5	0.6	0.593185	0.598654	1	1	PESC_DICDI	WDR12_DICDI	Q54RN6_DICDI
biological_process	GO:0071476	cellular hypotonic response	3	11	0.272727	0.558171	0.697359	1	1	DYNB_DICDI	Q75JG4_DICDI	C7FZZ0_DICDI
biological_process	GO:0031573	mitotic intra-S DNA damage checkpoint signaling	3	7	0.428571	0.869018	0.36171	1	1	Q55F81_DICDI	Q869Q1_DICDI	Q54PQ3_DICDI
biological_process	GO:0006384	transcription initiation from RNA polymerase III promoter	3	8	0.375	0.798941	0.4581	1	1	TF3C5_DICDI	Q54FU1_DICDI	Q54R53_DICDI
biological_process	GO:0006513	protein monoubiquitination	3	6	0.5	0.969639	0.130982	1	1	PEX12_DICDI	Q54UA7_DICDI	Q54XR0_DICDI
biological_process	GO:0000002	mitochondrial genome maintenance	3	4	0.75	0.988429	0.0734842	1	1	YME2_DICDI	Q54Z42_DICDI	Q54B92_DICDI
biological_process	GO:0006405	RNA export from nucleus	3	7	0.428571	0.995041	0.0121375	1	1	XPO5_DICDI	Q54F20_DICDI	Q75JS7_DICDI
biological_process	GO:0007033	vacuole organization	3	6	0.5	0.962132	0.0599388	1	1	SEY1_DICDI	CLH_DICDI	Q55CS3_DICDI
biological_process	GO:0032007	negative regulation of TOR signaling	3	6	0.5	0.987965	0.0609041	1	1	Y9099_DICDI	Q54UN5_DICDI	Q54VB2_DICDI
biological_process	GO:0001682	tRNA 5'-leader removal	3	9	0.333333	0.720858	0.547579	1	1	Q54U04_DICDI	Q54EV0_DICDI	Q54HY6_DICDI
biological_process	GO:0090502	RNA phosphodiester bond hydrolysis, endonucleolytic	3	6	0.5	0.534887	0.652071	1	1	Q54EV0_DICDI	Q551B2_DICDI	Q54HY6_DICDI
biological_process	GO:0070940	dephosphorylation of RNA polymerase II C-terminal domain	3	4	0.75	0.991494	0.0865873	1	1	Q75JA4_DICDI	Q54IJ8_DICDI	Q8ST13_DICDI
biological_process	GO:0034508	centromere complex assembly	3	4	0.75	0.987965	0.0609041	1	1	SUN1_DICDI	Q54XP9_DICDI	Q54RX7_DICDI
biological_process	GO:0007023	post-chaperonin tubulin folding pathway	3	5	0.6	0.967791	0.168155	1	1	TBCC_DICDI	TBCD_DICDI	TBCE_DICDI
biological_process	GO:0071805	potassium ion transmembrane transport	3	6	0.5	0.896545	0.279142	1	1	Y9144_DICDI	Q8T268_DICDI	Q55CX3_DICDI
biological_process	GO:0001881	receptor recycling	3	4	0.75	0.926516	0.262826	1	1	Y5795_DICDI	Q553Q7_DICDI	Q55BK2_DICDI
biological_process	GO:0019722	calcium-mediated signaling	3	3	1	0.876148	0.286498	1	1	PTP3_DICDI	ALIX_DICDI	Q86JH9_DICDI
biological_process	GO:0032958	inositol phosphate biosynthetic process	3	6	0.5	0.869018	0.36171	1	1	Q54QM1_DICDI	Q54XR3_DICDI	Q55AP4_DICDI
biological_process	GO:0042144	vacuole fusion, non-autophagic	3	6	0.5	0.926516	0.262826	1	1	Q54F53_DICDI	Q55CS3_DICDI	Q54LI4_DICDI
biological_process	GO:0002224	toll-like receptor signaling pathway	3	4	0.75	0.991494	0.0865873	1	1	Q55GS9_DICDI	Q555H5_DICDI	Q54BH0_DICDI
biological_process	GO:0043486	histone exchange	3	6	0.5	0.973137	0.103455	1	1	ARP6_DICDI	Q54IH7_DICDI	Q55GK2_DICDI
biological_process	GO:0007004	telomere maintenance via telomerase	3	3	1	0.967791	0.168155	1	1	RAD50_DICDI	Q54J89_DICDI	Q54B44_DICDI
biological_process	GO:0042148	strand invasion	3	4	0.75	0.967791	0.168155	1	1	RA51D_DICDI	Q54G98_DICDI	Q54QU4_DICDI
biological_process	GO:0016570	histone modification	3	5	0.6	0.990027	0.0185477	1	1	Q54Y92_DICDI	Q555G9_DICDI	Q54QM3_DICDI
biological_process	GO:0015937	coenzyme A biosynthetic process	3	8	0.375	0.798941	0.4581	1	1	Q54IX0_DICDI	Q54S85_DICDI	Q55FK9_DICDI
biological_process	GO:0097681	double-strand break repair via alternative nonhomologous end joining	3	5	0.6	0.967791	0.168155	1	1	DNLI3_DICDI	Q86KT0_DICDI	Q54S42_DICDI
biological_process	GO:0099041	vesicle tethering to Golgi	3	6	0.5	0.926516	0.262826	1	1	Q54TC7_DICDI	Q54YR7_DICDI	Q54TJ5_DICDI
biological_process	GO:0043007	maintenance of rDNA	3	3	1	1	0.0280265	1	1	Q54Y40_DICDI	Q54GC4_DICDI	C7G057_DICDI
biological_process	GO:0034058	endosomal vesicle fusion	3	4	0.75	0.988429	0.0734842	1	1	Q54EK0_DICDI	Q54LI4_DICDI	Q54ZD6_DICDI
biological_process	GO:0031119	tRNA pseudouridine synthesis	3	6	0.5	0.926516	0.262826	1	1	Q54FA0_DICDI	Q55G71_DICDI	Q54RR6_DICDI
biological_process	GO:0010883	regulation of lipid storage	3	8	0.375	0.798941	0.4581	1	1	Q54YE0_DICDI	Q54ZA6_DICDI	Q54SY6_DICDI
biological_process	GO:0001522	pseudouridine synthesis	3	5	0.6	0.760641	0.406815	1	1	Q75JJ6_DICDI	Q54RS0_DICDI	Q55AQ0_DICDI
biological_process	GO:0016255	attachment of GPI anchor to protein	3	6	0.5	0.926516	0.262826	1	1	Q54T45_DICDI	Q54U96_DICDI	B0G182_DICDI
biological_process	GO:0010421	hydrogen peroxide-mediated programmed cell death	3	9	0.333333	0.720858	0.547579	1	1	Q54E42_DICDI	Q54LJ4_DICDI	Q55AK6_DICDI
biological_process	GO:0010918	positive regulation of mitochondrial membrane potential	3	9	0.333333	0.720858	0.547579	1	1	Q54E42_DICDI	Q54LJ4_DICDI	Q55AK6_DICDI
biological_process	GO:0061780	mitotic cohesin loading	3	3	1	1	0.0280265	1	1	Q54RK7_DICDI	Q54BA8_DICDI	Q86J15_DICDI
biological_process	GO:0051315	attachment of mitotic spindle microtubules to kinetochore	3	3	1	1	0.0280265	1	1	Q54JX0_DICDI	Q54WM1_DICDI	Q54QB4_DICDI
biological_process	GO:0036453	transitive RNA interference	3	3	1	1	0.0280265	1	1	Q7KWS3_DICDI	Q55FS1_DICDI	Q54UI6_DICDI
biological_process	GO:0006656	phosphatidylcholine biosynthetic process	2	6	0.333333	0.737174	0.588265	1	1	Q86IB2_DICDI	Q86IF9_DICDI
biological_process	GO:0050821	protein stabilization	2	8	0.25	0.5419	0.752482	1	1	Q54J89_DICDI	Q54EV3_DICDI
biological_process	GO:0000423	mitophagy	2	3	0.666667	0.971973	0.22086	1	1	Q55CE3_DICDI	Q55BY0_DICDI
biological_process	GO:0050919	negative chemotaxis	2	4	0.5	0.940916	0.128235	1	1	PI3K2_DICDI	PTEN_DICDI
biological_process	GO:0045761	regulation of adenylate cyclase activity	2	4	0.5	0.913413	0.355133	1	1	PI3K2_DICDI	PTEN_DICDI
biological_process	GO:0022604	regulation of cell morphogenesis	2	3	0.666667	0.0233717	0.99405	0.999	1	PI3K2_DICDI	PTEN_DICDI
biological_process	GO:0006646	phosphatidylethanolamine biosynthetic process	2	7	0.285714	0.720858	0.547579	1	1	EKIB_DICDI	Q54CR2_DICDI
biological_process	GO:0009611	response to wounding	2	4	0.5	0.452421	0.811026	1	1	PEFA_DICDI	TS101_DICDI
biological_process	GO:0006541	glutamine metabolic process	2	11	0.181818	0.243353	0.919444	1	1	Q54LK1_DICDI	Q54DN5_DICDI
biological_process	GO:0010225	response to UV-C	2	10	0.2	0.372331	0.856866	1	1	CTNA_DICDI	YAKA_DICDI
biological_process	GO:0048837	sorocarp sorus development	2	9	0.222222	0.94098	0.0984355	1	1	PKS1_DICDI	Y1197_DICDI
biological_process	GO:0014067	negative regulation of phosphatidylinositol 3-kinase signaling	2	4	0.5	0.913413	0.355133	1	1	PDE5_DICDI	CNRN_DICDI
biological_process	GO:0006273	lagging strand elongation	2	5	0.4	0.926516	0.262826	1	1	DNLI3_DICDI	Q54E19_DICDI
biological_process	GO:0046580	negative regulation of Ras protein signal transduction	2	5	0.4	0.831845	0.479785	1	1	PK2_DICDI	NGAP_DICDI
biological_process	GO:0043157	response to cation stress	2	14	0.142857	0.153107	0.955565	1	1	STATC_DICDI	PP2BA_DICDI
biological_process	GO:0007020	microtubule nucleation	2	5	0.4	0.926516	0.262826	1	1	SPC97_DICDI	SPC98_DICDI
biological_process	GO:0006614	SRP-dependent cotranslational protein targeting to membrane	2	9	0.222222	0.480505	0.756647	1	1	SRP72_DICDI	Q54M91_DICDI
biological_process	GO:1902600	proton transmembrane transport	2	10	0.2	0.0301255	0.99204	1	1	PMA1_DICDI	Q553P8_DICDI
biological_process	GO:0000462	maturation of SSU-rRNA from tricistronic rRNA transcript (SSU-rRNA, 5.8S rRNA, LSU-rRNA)	2	19	0.105263	0.0233717	0.99405	0.999	1	HEAT1_DICDI	Q55C67_DICDI
biological_process	GO:0009116	nucleoside metabolic process	2	10	0.2	0.000727146	0.999904	0.197	1	Q54JK8_DICDI	Q554B6_DICDI
biological_process	GO:0030951	establishment or maintenance of microtubule cytoskeleton polarity	2	2	1	1	0.0923045	1	1	MTAA_DICDI	Q7KWK7_DICDI
biological_process	GO:0046785	microtubule polymerization	2	2	1	0.949893	0.156803	1	1	MTAA_DICDI	Q7KWK7_DICDI
biological_process	GO:0032981	mitochondrial respiratory chain complex I assembly	2	12	0.166667	0.243353	0.919444	1	1	NDUF5_DICDI	Q54I67_DICDI
biological_process	GO:0032781	positive regulation of ATP-dependent activity	2	3	0.666667	0.991494	0.0865873	1	1	PAKB_DICDI	AHSA_DICDI
biological_process	GO:0006895	Golgi to endosome transport	2	5	0.4	0.831845	0.479785	1	1	AP1G_DICDI	Q54C68_DICDI
biological_process	GO:1904515	positive regulation of TORC2 signaling	2	7	0.285714	0.63829	0.678887	1	1	RIP3_DICDI	Q55G82_DICDI
biological_process	GO:0046847	filopodium assembly	2	17	0.117647	0.661525	0.505301	1	1	PIRA_DICDI	MYOB_DICDI
biological_process	GO:0016339	calcium-dependent cell-cell adhesion via plasma membrane cell adhesion molecules	2	7	0.285714	0.5419	0.752482	1	1	HD_DICDI	PAXB_DICDI
biological_process	GO:0009306	protein secretion	2	16	0.125	0.00795982	0.998634	0.905	1	Q54C46_DICDI	Q7KWQ0_DICDI
biological_process	GO:0031157	regulation of aggregate size involved in sorocarp development	2	20	0.1	0.0341249	0.989326	1	1	CTNA_DICDI	ERK1_DICDI
biological_process	GO:0006904	vesicle docking involved in exocytosis	2	10	0.2	0.372331	0.856866	1	1	EXOC4_DICDI	Q55CS3_DICDI
biological_process	GO:0043406	positive regulation of MAP kinase activity	2	9	0.222222	0.452421	0.811026	1	1	MP2K1_DICDI	Y9625_DICDI
biological_process	GO:0070177	contractile vacuole discharge	2	8	0.25	0.639298	0.627669	1	1	EXOC4_DICDI	Q8I7P3_DICDI
biological_process	GO:0046999	regulation of conjugation	2	8	0.25	0.5419	0.752482	1	1	Q550Y1_DICDI	Q54IC6_DICDI
biological_process	GO:0000492	box C/D snoRNP assembly	2	7	0.285714	0.63829	0.678887	1	1	HBX5_DICDI	Q54C28_DICDI
biological_process	GO:0016558	protein import into peroxisome matrix	2	6	0.333333	0.720858	0.547579	1	1	PEX12_DICDI	PEX1_DICDI
biological_process	GO:0005980	glycogen catabolic process	2	3	0.666667	0.971973	0.22086	1	1	PHS2_DICDI	Q54K94_DICDI
biological_process	GO:0060359	response to ammonium ion	2	3	0.666667	0.971973	0.22086	1	1	PHS2_DICDI	DHKC_DICDI
biological_process	GO:0000727	double-strand break repair via break-induced replication	2	14	0.142857	0.153107	0.955565	1	1	CDC7_DICDI	Q54PQ3_DICDI
biological_process	GO:0000055	ribosomal large subunit export from nucleus	2	7	0.285714	0.63829	0.678887	1	1	NVL_DICDI	Q54XC9_DICDI
biological_process	GO:0006801	superoxide metabolic process	2	3	0.666667	0.343171	0.846893	1	1	SODM_DICDI	NCFA_DICDI
biological_process	GO:0016571	histone methylation	2	3	0.666667	0.829428	0.285062	1	1	SET1_DICDI	ANM2_DICDI
biological_process	GO:0040008	regulation of growth	2	3	0.666667	0.720858	0.547579	1	1	TS101_DICDI	EAF3_DICDI
biological_process	GO:0009086	methionine biosynthetic process	2	6	0.333333	0.372331	0.856866	1	1	Q55G42_DICDI	Q54L96_DICDI
biological_process	GO:0038203	TORC2 signaling	2	3	0.666667	0.720858	0.547579	1	1	RIP3_DICDI	Q54PV4_DICDI
biological_process	GO:0006360	transcription by RNA polymerase I	2	14	0.142857	0.269592	0.874783	1	1	RPC2_DICDI	Q54YF5_DICDI
biological_process	GO:0032511	late endosome to vacuole transport via multivesicular body sorting pathway	2	7	0.285714	0.876148	0.286498	1	1	VTA1_DICDI	CHMP7_DICDI
biological_process	GO:0006900	vesicle budding from membrane	2	5	0.4	0.993316	0.0227831	1	1	CHMP7_DICDI	Q54Y50_DICDI
biological_process	GO:0006099	tricarboxylic acid cycle	2	28	0.0714286	0.00329869	0.999491	0.647	1	Q54YN1_DICDI	Q54RR4_DICDI
biological_process	GO:0000915	actomyosin contractile ring assembly	2	2	1	1	0.0923045	1	1	LVSA_DICDI	CLH_DICDI
biological_process	GO:0034497	protein localization to phagophore assembly site	2	5	0.4	0.831845	0.479785	1	1	Q54CV2_DICDI	Q55BY0_DICDI
biological_process	GO:0030150	protein import into mitochondrial matrix	2	12	0.166667	0.243353	0.919444	1	1	TIM50_DICDI	Q558Z1_DICDI
biological_process	GO:0034620	cellular response to unfolded protein	2	7	0.285714	0.987277	0.0342935	1	1	HS7C3_DICDI	HS7C4_DICDI
biological_process	GO:0009267	cellular response to starvation	2	9	0.222222	0.6052	0.456301	1	1	LVSB_DICDI	Q54LI4_DICDI
biological_process	GO:0006013	mannose metabolic process	2	9	0.222222	0.452421	0.811026	1	1	MANC_DICDI	MANF_DICDI
biological_process	GO:0048255	mRNA stabilization	2	2	1	1	0.0923045	1	1	IFKA_DICDI	Q55DA9_DICDI
biological_process	GO:0031158	negative regulation of aggregate size involved in sorocarp development	2	6	0.333333	0.737174	0.588265	1	1	IFKA_DICDI	QKGA_DICDI
biological_process	GO:0006417	regulation of translation	2	4	0.5	0.990731	0.0162862	1	1	IFKA_DICDI	PIRA_DICDI
biological_process	GO:0000165	MAPK cascade	2	3	0.666667	0.994077	0.0154636	1	1	MP2K1_DICDI	ERK1_DICDI
biological_process	GO:0009612	response to mechanical stimulus	2	3	0.666667	0.988429	0.0734842	1	1	KIF12_DICDI	ICPA_DICDI
biological_process	GO:0051764	actin crosslink formation	2	6	0.333333	0.737174	0.588265	1	1	GXCB_DICDI	MHCKA_DICDI
biological_process	GO:0006082	organic acid metabolic process	2	23	0.0869565	9.4628e-17	1	0	1	C519D_DICDI	C519B_DICDI
biological_process	GO:0051131	chaperone-mediated protein complex assembly	2	6	0.333333	0.737174	0.588265	1	1	LONM1_DICDI	PFD6_DICDI
biological_process	GO:0006515	protein quality control for misfolded or incompletely synthesized proteins	2	6	0.333333	0.781271	0.441829	1	1	LONM1_DICDI	Q55FC8_DICDI
biological_process	GO:0050830	defense response to Gram-positive bacterium	2	7	0.285714	0.63829	0.678887	1	1	LMPA_DICDI	ATG1_DICDI
biological_process	GO:0051014	actin filament severing	2	11	0.181818	0.243353	0.919444	1	1	VILD_DICDI	Q54S11_DICDI
biological_process	GO:0030244	cellulose biosynthetic process	2	3	0.666667	0.971973	0.22086	1	1	DCSA_DICDI	IPLA_DICDI
biological_process	GO:0017183	peptidyl-diphthamide biosynthetic process from peptidyl-histidine	2	10	0.2	0.372331	0.856866	1	1	DPH2_DICDI	DPH1_DICDI
biological_process	GO:0006879	cellular iron ion homeostasis	2	7	0.285714	0.372331	0.856866	1	1	FRDA_DICDI	GLRX3_DICDI
biological_process	GO:0006811	ion transport	2	5	0.4	0.00125612	0.999409	0.32	1	FRDA_DICDI	Q55CX3_DICDI
biological_process	GO:0006297	nucleotide-excision repair, DNA gap filling	2	4	0.5	0.913413	0.355133	1	1	DNLI4_DICDI	DPOE1_DICDI
biological_process	GO:0006631	fatty acid metabolic process	2	23	0.0869565	0.00766416	0.995848	0.889	1	Q54DE7_DICDI	Q55DA4_DICDI
biological_process	GO:0050982	detection of mechanical stimulus	2	4	0.5	0.913413	0.355133	1	1	GAPA_DICDI	Y2801_DICDI
biological_process	GO:0034605	cellular response to heat	2	4	0.5	0.869018	0.36171	1	1	HS32_DICDI	Q54EV3_DICDI
biological_process	GO:0016180	snRNA processing	2	3	0.666667	0.92733	0.156714	1	1	INT11_DICDI	INT4_DICDI
biological_process	GO:0042593	glucose homeostasis	2	6	0.333333	0.302641	0.892311	1	1	CTNA_DICDI	Q55EQ6_DICDI
biological_process	GO:0045910	negative regulation of DNA recombination	2	3	0.666667	0.991494	0.0865873	1	1	MSH6_DICDI	MSH2_DICDI
biological_process	GO:0016584	nucleosome positioning	2	3	0.666667	0.971973	0.22086	1	1	Q54CI4_DICDI	Q54CF8_DICDI
biological_process	GO:0045859	regulation of protein kinase activity	2	6	0.333333	0.958893	0.0709614	1	1	RIP3_DICDI	Q54UG7_DICDI
biological_process	GO:0035020	regulation of Rac protein signal transduction	2	5	0.4	0.831845	0.479785	1	1	GACII_DICDI	GACG_DICDI
biological_process	GO:0043666	regulation of phosphoprotein phosphatase activity	2	5	0.4	0.939096	0.201059	1	1	HD_DICDI	Q55FM2_DICDI
biological_process	GO:0051592	response to calcium ion	2	6	0.333333	0.480505	0.756647	1	1	HD_DICDI	NGAP_DICDI
biological_process	GO:0031048	heterochromatin assembly by small RNA	2	4	0.5	0.969639	0.130982	1	1	Q869R3_DICDI	Q54XT3_DICDI
biological_process	GO:0044656	regulation of post-lysosomal vacuole size	2	3	0.666667	0.971973	0.22086	1	1	MYOB_DICDI	DYNA_DICDI
biological_process	GO:0051707	response to other organism	2	6	0.333333	0.00297213	0.99841	0.578	1	VILD_DICDI	MYOB_DICDI
biological_process	GO:0007162	negative regulation of cell adhesion	2	2	1	0.967791	0.168155	1	1	CTNA_DICDI	Q54KK9_DICDI
biological_process	GO:0051645	Golgi localization	2	6	0.333333	0.63829	0.678887	1	1	DYIN_DICDI	Q54G01_DICDI
biological_process	GO:0006268	DNA unwinding involved in DNA replication	2	8	0.25	0.5419	0.752482	1	1	Q54DM3_DICDI	B0G0Y4_DICDI
biological_process	GO:0002031	G protein-coupled receptor internalization	2	2	1	1	0.0923045	1	1	ADCB_DICDI	ADCC_DICDI
biological_process	GO:0071897	DNA biosynthetic process	2	4	0.5	0.709782	0.465113	1	1	DNLI4_DICDI	DNLI3_DICDI
biological_process	GO:0006266	DNA ligation	2	3	0.666667	0.926516	0.262826	1	1	DNLI3_DICDI	Q54E19_DICDI
biological_process	GO:0000467	exonucleolytic trimming to generate mature 3'-end of 5.8S rRNA from tricistronic rRNA transcript (SSU-rRNA, 5.8S rRNA, LSU-rRNA)	2	8	0.25	0.5419	0.752482	1	1	Q55AW0_DICDI	Q54YU5_DICDI
biological_process	GO:0051272	positive regulation of cellular component movement	2	3	0.666667	0.63829	0.678887	1	1	PTEN_DICDI	GBPD_DICDI
biological_process	GO:0006071	glycerol metabolic process	2	4	0.5	0.5419	0.752482	1	1	GLPK_DICDI	DGAT1_DICDI
biological_process	GO:0006284	base-excision repair	2	7	0.285714	0.770869	0.428483	1	1	END4_DICDI	Q86H44_DICDI
biological_process	GO:1905301	regulation of macropinocytosis	2	6	0.333333	0.815734	0.352935	1	1	KAPC_DICDI	Q54B43_DICDI
biological_process	GO:0031148	DIF-1 biosynthetic process	2	2	1	1	0.0923045	1	1	DMTA_DICDI	STLB_DICDI
biological_process	GO:0019432	triglyceride biosynthetic process	2	5	0.4	0.737174	0.588265	1	1	DGAT1_DICDI	Q75JA1_DICDI
biological_process	GO:0001878	response to yeast	2	4	0.5	0.913413	0.355133	1	1	BECNA_DICDI	ATG1_DICDI
biological_process	GO:0006611	protein export from nucleus	2	7	0.285714	0.5419	0.752482	1	1	XPO5_DICDI	XPO6_DICDI
biological_process	GO:0051016	barbed-end actin filament capping	2	7	0.285714	0.5419	0.752482	1	1	VILD_DICDI	Q54S11_DICDI
biological_process	GO:0000710	meiotic mismatch repair	2	4	0.5	0.913413	0.355133	1	1	MSH6_DICDI	Q54QB8_DICDI
biological_process	GO:0006120	mitochondrial electron transport, NADH to ubiquinone	2	10	0.2	0.372331	0.856866	1	1	NDUV1_DICDI	ROCO4_DICDI
biological_process	GO:2000249	regulation of actin cytoskeleton reorganization	2	3	0.666667	0.971973	0.22086	1	1	PAXB_DICDI	Q54B43_DICDI
biological_process	GO:0006370	7-methylguanosine mRNA capping	2	6	0.333333	0.737174	0.588265	1	1	MTR1_DICDI	Q54Y13_DICDI
biological_process	GO:0072382	minus-end-directed vesicle transport along microtubule	2	2	1	1	0.0923045	1	1	DYHC_DICDI	DYIN_DICDI
biological_process	GO:0070534	protein K63-linked ubiquitination	2	4	0.5	0.913413	0.355133	1	1	PRP19_DICDI	Q54FR5_DICDI
biological_process	GO:0140042	lipid droplet formation	2	2	1	1	0.0923045	1	1	DGAT1_DICDI	Q54K07_DICDI
biological_process	GO:0031286	negative regulation of sorocarp stalk cell differentiation	2	5	0.4	0.831845	0.479785	1	1	YELA_DICDI	ALIX_DICDI
biological_process	GO:0071480	cellular response to gamma radiation	2	2	1	1	0.0923045	1	1	KU70_DICDI	XRCC5_DICDI
biological_process	GO:0071481	cellular response to X-ray	2	2	1	1	0.0923045	1	1	KU70_DICDI	XRCC5_DICDI
biological_process	GO:0000737	DNA catabolic process, endonucleolytic	2	5	0.4	0.831845	0.479785	1	1	Q54PY6_DICDI	Q54PQ3_DICDI
biological_process	GO:0051642	centrosome localization	2	7	0.285714	0.720858	0.547579	1	1	SUN1_DICDI	Q55BL8_DICDI
biological_process	GO:0016485	protein processing	2	7	0.285714	0.20798	0.881315	1	1	APH1_DICDI	Q54XC3_DICDI
biological_process	GO:0033617	mitochondrial cytochrome c oxidase assembly	2	9	0.222222	0.452421	0.811026	1	1	Y8293_DICDI	Q54TT7_DICDI
biological_process	GO:0071051	polyadenylation-dependent snoRNA 3'-end processing	2	6	0.333333	0.737174	0.588265	1	1	Q55AW0_DICDI	Q55BB0_DICDI
biological_process	GO:0071539	protein localization to centrosome	2	3	0.666667	0.971973	0.22086	1	1	Q54RJ3_DICDI	Q54NE5_DICDI
biological_process	GO:0070475	rRNA base methylation	2	9	0.222222	0.302641	0.892311	1	1	Q55G09_DICDI	Q54TL4_DICDI
biological_process	GO:0030198	extracellular matrix organization	2	46	0.0434783	1.19339e-05	0.999999	0.003	1	Q54QY4_DICDI	Q54DS7_DICDI
biological_process	GO:0010506	regulation of autophagy	2	6	0.333333	0.571517	0.656829	1	1	RMC1_DICDI	Y9099_DICDI
biological_process	GO:0042307	positive regulation of protein import into nucleus	2	2	1	1	0.0923045	1	1	PYK3_DICDI	SPLB_DICDI
biological_process	GO:0050684	regulation of mRNA processing	2	2	1	0.995945	0.0303612	1	1	SKY1_DICDI	Q55A48_DICDI
biological_process	GO:0006685	sphingomyelin catabolic process	2	4	0.5	0.913413	0.355133	1	1	SGMA_DICDI	SGMB_DICDI
biological_process	GO:0032446	protein modification by small protein conjugation	2	8	0.25	0.906683	0.124002	1	1	ATG7_DICDI	Q550P6_DICDI
biological_process	GO:1904262	negative regulation of TORC1 signaling	2	3	0.666667	0.971973	0.22086	1	1	Q54NW3_DICDI	Q54Y15_DICDI
biological_process	GO:0006434	seryl-tRNA aminoacylation	2	2	1	1	0.0923045	1	1	SYSC_DICDI	Q55GM6_DICDI
biological_process	GO:0048278	vesicle docking	2	14	0.142857	0.151846	0.932729	1	1	STX7A_DICDI	STX7B_DICDI
biological_process	GO:0099138	altruistic, chimeric sorocarp development	2	4	0.5	0.913413	0.355133	1	1	ABKD_DICDI	Q54S78_DICDI
biological_process	GO:0006620	posttranslational protein targeting to endoplasmic reticulum membrane	2	4	0.5	0.63829	0.678887	1	1	Q55C65_DICDI	Q54M91_DICDI
biological_process	GO:1901261	regulation of sorocarp spore cell differentiation	2	6	0.333333	0.880546	0.206395	1	1	SRFC_DICDI	KAPC_DICDI
biological_process	GO:0009813	flavonoid biosynthetic process	2	2	1	1	0.0923045	1	1	STLB_DICDI	PKS1_DICDI
biological_process	GO:0030639	polyketide biosynthetic process	2	2	1	1	0.0923045	1	1	STLB_DICDI	PKS1_DICDI
biological_process	GO:0009750	response to fructose	2	3	0.666667	0.971973	0.22086	1	1	Q55EQ6_DICDI	Q54Q47_DICDI
biological_process	GO:0010043	response to zinc ion	2	3	0.666667	0.971973	0.22086	1	1	CRTF_DICDI	Q54Q47_DICDI
biological_process	GO:0006665	sphingolipid metabolic process	2	18	0.111111	0.0015784	0.999563	0.396	1	SPHKA_DICDI	Q54F52_DICDI
biological_process	GO:0072755	cellular response to benomyl	2	2	1	1	0.0923045	1	1	IMPCT_DICDI	GCN1_DICDI
biological_process	GO:0070301	cellular response to hydrogen peroxide	2	2	1	0.917507	0.218729	1	1	IMPCT_DICDI	GCN1_DICDI
biological_process	GO:0030322	stabilization of membrane potential	2	2	1	1	0.0923045	1	1	Y9144_DICDI	Q8T268_DICDI
biological_process	GO:0051409	response to nitrosative stress	2	2	1	0.913413	0.355133	1	1	YAKA_DICDI	Q86AD8_DICDI
biological_process	GO:0061709	reticulophagy	2	5	0.4	0.831845	0.479785	1	1	Q8MMZ9_DICDI	Q54T12_DICDI
biological_process	GO:0051260	protein homooligomerization	2	15	0.133333	0.0934912	0.975866	1	1	Q54MM2_DICDI	Q54MC2_DICDI
biological_process	GO:0071218	cellular response to misfolded protein	2	2	1	0.969639	0.130982	1	1	Y5729_DICDI	Q54TF9_DICDI
biological_process	GO:0007228	positive regulation of hh target transcription factor activity	2	2	1	1	0.0923045	1	1	Y6627_DICDI	TSUA_DICDI
biological_process	GO:0032418	lysosome localization	2	5	0.4	0.831845	0.479785	1	1	Y8421_DICDI	Q54RP3_DICDI
biological_process	GO:0006612	protein targeting to membrane	2	14	0.142857	0.169071	0.913862	1	1	VPS37_DICDI	Q550I3_DICDI
biological_process	GO:0033674	positive regulation of kinase activity	2	3	0.666667	0.717327	0.419667	1	1	GCN1_DICDI	Q54HT3_DICDI
biological_process	GO:0051593	response to folic acid	2	3	0.666667	0.443079	0.718654	1	1	VP13F_DICDI	DRKD_DICDI
biological_process	GO:0018345	protein palmitoylation	2	5	0.4	0.192011	0.92762	1	1	ZDHC5_DICDI	Q54IT7_DICDI
biological_process	GO:0000012	single strand break repair	2	6	0.333333	0.63829	0.678887	1	1	DNLI4_DICDI	Q86H44_DICDI
biological_process	GO:0007096	regulation of exit from mitosis	2	3	0.666667	0.913413	0.355133	1	1	Q54Y40_DICDI	C7G057_DICDI
biological_process	GO:0006896	Golgi to vacuole transport	2	8	0.25	0.720858	0.547579	1	1	AP1G_DICDI	Q86HF6_DICDI
biological_process	GO:0070973	protein localization to endoplasmic reticulum exit site	2	3	0.666667	0.971973	0.22086	1	1	Q54JP0_DICDI	Q55BR0_DICDI
biological_process	GO:1905037	autophagosome organization	2	4	0.5	0.978276	0.048135	1	1	ATG1_DICDI	Q559F5_DICDI
biological_process	GO:0044255	cellular lipid metabolic process	2	6	0.333333	0.0922199	0.926336	1	1	Q75JA1_DICDI	Q54I12_DICDI
biological_process	GO:0006448	regulation of translational elongation	2	3	0.666667	0.436232	0.764914	1	1	ABCF4_DICDI	GCN1_DICDI
biological_process	GO:0006336	DNA replication-independent chromatin assembly	2	4	0.5	0.969639	0.130982	1	1	HIRA_DICDI	Q55GC1_DICDI
biological_process	GO:0017196	N-terminal peptidyl-methionine acetylation	2	5	0.4	0.831845	0.479785	1	1	Q55F07_DICDI	Q54C34_DICDI
biological_process	GO:0033275	actin-myosin filament sliding	2	3	0.666667	0.971973	0.22086	1	1	MYOB_DICDI	MYOJ_DICDI
biological_process	GO:0045943	positive regulation of transcription by RNA polymerase I	2	3	0.666667	0.971973	0.22086	1	1	HEAT1_DICDI	Q55CD3_DICDI
biological_process	GO:0019915	lipid storage	2	4	0.5	0.933765	0.173237	1	1	Q54I12_DICDI	Q54K07_DICDI
biological_process	GO:0043968	histone H2A acetylation	2	3	0.666667	0.971973	0.22086	1	1	EAF3_DICDI	Q54IH7_DICDI
biological_process	GO:0034088	maintenance of mitotic sister chromatid cohesion	2	3	0.666667	0.971973	0.22086	1	1	Q54RK7_DICDI	Q54S35_DICDI
biological_process	GO:0071474	cellular hyperosmotic response	2	2	1	1	0.0923045	1	1	DHKJ_DICDI	Q55FP2_DICDI
biological_process	GO:0042795	snRNA transcription by RNA polymerase II	2	3	0.666667	0.971973	0.22086	1	1	Q555K3_DICDI	Q54MW3_DICDI
biological_process	GO:0042796	snRNA transcription by RNA polymerase III	2	3	0.666667	0.971973	0.22086	1	1	Q555K3_DICDI	Q54MW3_DICDI
biological_process	GO:0036065	fucosylation	2	10	0.2	0.408413	0.806165	1	1	Q86J24_DICDI	Q54RA6_DICDI
biological_process	GO:0031087	deadenylation-independent decapping of nuclear-transcribed mRNA	2	2	1	1	0.0923045	1	1	Q54J96_DICDI	Q54KM1_DICDI
biological_process	GO:0033260	nuclear DNA replication	2	2	1	0.193835	0.94004	1	1	Q54MP7_DICDI	Q54X62_DICDI
biological_process	GO:0043985	histone H4-R3 methylation	2	2	1	1	0.0923045	1	1	Q54VA7_DICDI	B0G164_DICDI
biological_process	GO:0006813	potassium ion transport	2	4	0.5	0.958867	0.123852	1	1	Q55CU6_DICDI	Q553P8_DICDI
biological_process	GO:0019290	siderophore biosynthetic process	2	4	0.5	0.913413	0.355133	1	1	Q54VN5_DICDI	Q54KE0_DICDI
biological_process	GO:0070919	production of siRNA involved in gene silencing by small RNA	2	3	0.666667	0.971973	0.22086	1	1	Q54EH7_DICDI	Q54UI6_DICDI
biological_process	GO:0031297	replication fork processing	2	5	0.4	0.869018	0.36171	1	1	Q54TE8_DICDI	Q554U4_DICDI
biological_process	GO:0008298	intracellular mRNA localization	2	2	1	1	0.0923045	1	1	Q54GR0_DICDI	Q55F70_DICDI
biological_process	GO:0006044	N-acetylglucosamine metabolic process	2	6	0.333333	0.63829	0.678887	1	1	Q54M58_DICDI	Q559V4_DICDI
biological_process	GO:0045717	negative regulation of fatty acid biosynthetic process	2	3	0.666667	0.971973	0.22086	1	1	Q54MK9_DICDI	Q54C05_DICDI
biological_process	GO:0045002	double-strand break repair via single-strand annealing	2	2	1	1	0.0280265	1	1	Q54KW0_DICDI	Q55E38_DICDI
biological_process	GO:0051256	mitotic spindle midzone assembly	2	2	1	1	0.0923045	1	1	Q54VM5_DICDI	Q54PZ3_DICDI
biological_process	GO:0000972	transcription-dependent tethering of RNA polymerase II gene DNA at nuclear periphery	2	3	0.666667	0.869018	0.36171	1	1	Q54F20_DICDI	Q54KA3_DICDI
biological_process	GO:0007095	mitotic G2 DNA damage checkpoint signaling	2	3	0.666667	0.971973	0.22086	1	1	Q55D89_DICDI	Q54X69_DICDI
biological_process	GO:0010586	miRNA metabolic process	2	3	0.666667	0.971973	0.22086	1	1	Q55FS1_DICDI	Q54UI6_DICDI
biological_process	GO:0009305	protein biotinylation	2	3	0.666667	0.971973	0.22086	1	1	Q54IF5_DICDI	Q54I33_DICDI
biological_process	GO:0034080	CENP-A containing chromatin assembly	2	3	0.666667	0.971973	0.22086	1	1	Q54HI8_DICDI	Q54HI6_DICDI
biological_process	GO:0006517	protein deglycosylation	2	2	1	0.971973	0.22086	1	1	Q55G89_DICDI	Q55FC8_DICDI
biological_process	GO:0006002	fructose 6-phosphate metabolic process	1	3	0.333333	0.77914	0.662748	1	1	Q54LK1_DICDI
biological_process	GO:0098630	aggregation of unicellular organisms	1	1	1	1	0.303878	1	1	PDPKA_DICDI
biological_process	GO:0007219	Notch signaling pathway	1	5	0.2	0.520215	0.836661	1	1	APH1_DICDI
biological_process	GO:0034394	protein localization to cell surface	1	5	0.2	0.411735	0.88634	1	1	Q54T45_DICDI
biological_process	GO:0061462	protein localization to lysosome	1	5	0.2	0.737174	0.588265	1	1	Q54Y15_DICDI
biological_process	GO:0072657	protein localization to membrane	1	5	0.2	0.136022	0.91064	1	1	MYOG_DICDI
biological_process	GO:0031670	cellular response to nutrient	1	2	0.5	0.907696	0.515452	1	1	PHG2_DICDI
biological_process	GO:0006096	glycolytic process	1	20	0.05	0.0187299	0.996379	0.999	1	ODP2_DICDI
biological_process	GO:0030011	maintenance of cell polarity	1	3	0.333333	0.77914	0.662748	1	1	PI3K2_DICDI
biological_process	GO:1900027	regulation of ruffle assembly	1	2	0.5	0.907696	0.515452	1	1	PI3K2_DICDI
biological_process	GO:0007193	adenylate cyclase-inhibiting G protein-coupled receptor signaling pathway	1	3	0.333333	0.77914	0.662748	1	1	TBC5B_DICDI
biological_process	GO:0006198	cAMP catabolic process	1	3	0.333333	0.77914	0.662748	1	1	PDE6_DICDI
biological_process	GO:0046069	cGMP catabolic process	1	3	0.333333	0.77914	0.662748	1	1	PDE5_DICDI
biological_process	GO:1902168	response to catechin	1	8	0.125	0.247518	0.944977	1	1	GBF_DICDI
biological_process	GO:0061128	positive regulation of chemotaxis to cAMP by DIF-2	1	3	0.333333	0.77914	0.662748	1	1	DHKC_DICDI
biological_process	GO:1905511	positive regulation of myosin II filament assembly	1	1	1	1	0.303878	1	1	PDE5_DICDI
biological_process	GO:0006272	leading strand elongation	1	10	0.1	0.143134	0.973372	1	1	DPOE1_DICDI
biological_process	GO:2000480	negative regulation of cAMP-dependent protein kinase activity	1	2	0.5	0.907696	0.515452	1	1	PDE6_DICDI
biological_process	GO:0061118	regulation of positive chemotaxis to cAMP	1	5	0.2	0.408413	0.806165	1	1	PDE6_DICDI
biological_process	GO:0031929	TOR signaling	1	5	0.2	0.632889	0.510285	1	1	PK2_DICDI
biological_process	GO:0047484	regulation of response to osmotic stress	1	2	0.5	0.907696	0.515452	1	1	STATC_DICDI
biological_process	GO:0031117	positive regulation of microtubule depolymerization	1	1	1	1	0.303878	1	1	SPAST_DICDI
biological_process	GO:0034214	protein hexamerization	1	1	1	1	0.303878	1	1	SPAST_DICDI
biological_process	GO:0007035	vacuolar acidification	1	4	0.25	0.520215	0.836661	1	1	B0G145_DICDI
biological_process	GO:0000027	ribosomal large subunit assembly	1	17	0.0588235	0.017701	0.997906	0.999	1	MDN1_DICDI
biological_process	GO:0061025	membrane fusion	1	3	0.333333	0.19492	0.879126	1	1	Q553R1_DICDI
biological_process	GO:0097720	calcineurin-mediated signaling	1	3	0.333333	0.77914	0.662748	1	1	PP2BA_DICDI
biological_process	GO:0031289	actin phosphorylation	1	2	0.5	0.907696	0.515452	1	1	SRFA_DICDI
biological_process	GO:0030336	negative regulation of cell migration	1	2	0.5	0.907696	0.515452	1	1	ARPIN_DICDI
biological_process	GO:0022407	regulation of cell-cell adhesion	1	4	0.25	0.321113	0.920916	1	1	Y1197_DICDI
biological_process	GO:0046578	regulation of Ras protein signal transduction	1	7	0.142857	0.632889	0.510285	1	1	Y7588_DICDI
biological_process	GO:2000134	negative regulation of G1/S transition of mitotic cell cycle	1	1	1	1	0.303878	1	1	RBLA_DICDI
biological_process	GO:0010389	regulation of G2/M transition of mitotic cell cycle	1	2	0.5	0.976881	0.0824926	1	1	RBLA_DICDI
biological_process	GO:0034389	lipid droplet organization	1	3	0.333333	0.913413	0.355133	1	1	Q54K07_DICDI
biological_process	GO:0010812	negative regulation of cell-substrate adhesion	1	3	0.333333	0.77914	0.662748	1	1	STK4L_DICDI
biological_process	GO:0017157	regulation of exocytosis	1	6	0.166667	0.558171	0.697359	1	1	Q54GV1_DICDI
biological_process	GO:0007188	adenylate cyclase-modulating G protein-coupled receptor signaling pathway	1	18	0.0555556	0.912332	0.135033	1	1	PTEN_DICDI
biological_process	GO:0051897	positive regulation of protein kinase B signaling	1	6	0.166667	0.411735	0.88634	1	1	GEFB_DICDI
biological_process	GO:0090385	phagosome-lysosome fusion	1	11	0.0909091	0.107689	0.981478	1	1	Q552H0_DICDI
biological_process	GO:1905162	regulation of phagosome maturation	1	2	0.5	0.907696	0.515452	1	1	Q54ST5_DICDI
biological_process	GO:0043407	negative regulation of MAP kinase activity	1	3	0.333333	0.77914	0.662748	1	1	MPL1_DICDI
biological_process	GO:1901262	negative regulation of sorocarp spore cell differentiation	1	2	0.5	0.907696	0.515452	1	1	HBX4_DICDI
biological_process	GO:1903666	positive regulation of asexual reproduction	1	4	0.25	0.644867	0.765286	1	1	SPHKA_DICDI
biological_process	GO:0008360	regulation of cell shape	1	22	0.0454545	0.00362126	0.99966	0.677	1	Y5837_DICDI
biological_process	GO:0006420	arginyl-tRNA aminoacylation	1	2	0.5	0.907696	0.515452	1	1	Q54JT6_DICDI
biological_process	GO:0006435	threonyl-tRNA aminoacylation	1	2	0.5	0.907696	0.515452	1	1	SYTC2_DICDI
biological_process	GO:0018283	iron incorporation into metallo-sulfur cluster	1	2	0.5	0.907696	0.515452	1	1	FRDA_DICDI
biological_process	GO:0008277	regulation of G protein-coupled receptor signaling pathway	1	6	0.166667	0.919939	0.162646	1	1	YAKA_DICDI
biological_process	GO:0007009	plasma membrane organization	1	2	0.5	0.480505	0.756647	1	1	C7FZZ0_DICDI
biological_process	GO:0009411	response to UV	1	9	0.111111	0.0628611	0.98127	1	1	Q55EZ8_DICDI
biological_process	GO:0016338	calcium-independent cell-cell adhesion via plasma membrane cell-adhesion molecules	1	4	0.25	0.644867	0.765286	1	1	TRIA_DICDI
biological_process	GO:0001709	cell fate determination	1	1	1	1	0.303878	1	1	TRIA_DICDI
biological_process	GO:0032496	response to lipopolysaccharide	1	2	0.5	0.907696	0.515452	1	1	TIRA_DICDI
biological_process	GO:0006265	DNA topological change	1	4	0.25	0.644867	0.765286	1	1	TOP3_DICDI
biological_process	GO:0006865	amino acid transport	1	10	0.1	0.0427051	0.990554	1	1	Q54CK3_DICDI
biological_process	GO:0001672	regulation of chromatin assembly or disassembly	1	3	0.333333	0.520215	0.836661	1	1	Q54WQ2_DICDI
biological_process	GO:0046512	sphingosine biosynthetic process	1	8	0.125	0.247518	0.944977	1	1	SPHKA_DICDI
biological_process	GO:0071902	positive regulation of protein serine/threonine kinase activity	1	8	0.125	0.192011	0.92762	1	1	STK11_DICDI
biological_process	GO:0061098	positive regulation of protein tyrosine kinase activity	1	1	1	1	0.303878	1	1	STK11_DICDI
biological_process	GO:1901263	positive regulation of sorocarp spore cell differentiation	1	3	0.333333	0.77914	0.662748	1	1	STK11_DICDI
biological_process	GO:0000288	nuclear-transcribed mRNA catabolic process, deadenylation-dependent decay	1	2	0.5	0.976492	0.059084	1	1	Q75JL4_DICDI
biological_process	GO:0034402	recruitment of 3'-end processing factors to RNA polymerase II holoenzyme complex	1	2	0.5	0.907696	0.515452	1	1	Q555G9_DICDI
biological_process	GO:0006383	transcription by RNA polymerase III	1	19	0.0526316	0.175483	0.914496	1	1	Q86I37_DICDI
biological_process	GO:0000447	endonucleolytic cleavage in ITS1 to separate SSU-rRNA from 5.8S rRNA and LSU-rRNA from tricistronic rRNA transcript (SSU-rRNA, 5.8S rRNA, LSU-rRNA)	1	6	0.166667	0.411735	0.88634	1	1	Q54D59_DICDI
biological_process	GO:0032008	positive regulation of TOR signaling	1	9	0.111111	0.125217	0.957295	1	1	WDR24_DICDI
biological_process	GO:0042554	superoxide anion generation	1	5	0.2	0.520215	0.836661	1	1	NOXC_DICDI
biological_process	GO:0006839	mitochondrial transport	1	5	0.2	0.000342032	0.999915	0.094	1	KBP_DICDI
biological_process	GO:0015914	phospholipid transport	1	4	0.25	0.983484	0.0534648	1	1	Q54CP2_DICDI
biological_process	GO:0040029	regulation of gene expression, epigenetic	1	1	1	1	0.303878	1	1	SET1_DICDI
biological_process	GO:0034498	early endosome to Golgi transport	1	1	1	1	0.303878	1	1	TPC10_DICDI
biological_process	GO:0071786	endoplasmic reticulum tubular network organization	1	2	0.5	0.907696	0.515452	1	1	Q54GT5_DICDI
biological_process	GO:0061024	membrane organization	1	5	0.2	0.265049	0.787804	1	1	Q552K7_DICDI
biological_process	GO:0001778	plasma membrane repair	1	7	0.142857	0.321113	0.920916	1	1	TS101_DICDI
biological_process	GO:0007190	activation of adenylate cyclase activity	1	7	0.142857	0.321113	0.920916	1	1	RIP3_DICDI
biological_process	GO:0006189	'de novo' IMP biosynthetic process	1	7	0.142857	0.321113	0.920916	1	1	PURCE_DICDI
biological_process	GO:0006429	leucyl-tRNA aminoacylation	1	2	0.5	0.907696	0.515452	1	1	SYLM_DICDI
biological_process	GO:0031204	posttranslational protein targeting to membrane, translocation	1	4	0.25	0.644867	0.765286	1	1	Q54M91_DICDI
biological_process	GO:0006616	SRP-dependent cotranslational protein targeting to membrane, translocation	1	3	0.333333	0.77914	0.662748	1	1	SRP54_DICDI
biological_process	GO:0006816	calcium ion transport	1	8	0.125	0.0427051	0.990554	1	1	IPLA_DICDI
biological_process	GO:0008643	carbohydrate transport	1	9	0.111111	0.372331	0.856866	1	1	FUCT1_DICDI
biological_process	GO:0036360	sorocarp stalk morphogenesis	1	7	0.142857	0.321113	0.920916	1	1	ROC11_DICDI
biological_process	GO:0006427	histidyl-tRNA aminoacylation	1	2	0.5	0.907696	0.515452	1	1	SYHM_DICDI
biological_process	GO:0007166	cell surface receptor signaling pathway	1	16	0.0625	0.409369	0.709765	1	1	FSLG_DICDI
biological_process	GO:0043171	peptide catabolic process	1	5	0.2	0.247518	0.944977	1	1	Q55CT4_DICDI
biological_process	GO:0070084	protein initiator methionine removal	1	3	0.333333	0.77914	0.662748	1	1	MAP12_DICDI
biological_process	GO:0006107	oxaloacetate metabolic process	1	5	0.2	0.520215	0.836661	1	1	Q54Q74_DICDI
biological_process	GO:0000460	maturation of 5.8S rRNA	1	9	0.111111	0.347697	0.793299	1	1	Q86IE2_DICDI
biological_process	GO:0000470	maturation of LSU-rRNA	1	11	0.0909091	0.0835356	0.969875	1	1	Q54TL4_DICDI
biological_process	GO:0140026	contractile vacuole dissociation from plasma membrane	1	1	1	1	0.303878	1	1	LVSA_DICDI
biological_process	GO:0006869	lipid transport	1	17	0.0588235	0.144389	0.917985	1	1	ABCA5_DICDI
biological_process	GO:0055070	copper ion homeostasis	1	5	0.2	0.188974	0.961721	1	1	Q557B5_DICDI
biological_process	GO:0051603	proteolysis involved in cellular protein catabolic process	1	28	0.0357143	0.739883	0.30456	1	1	Q54N05_DICDI
biological_process	GO:0007214	gamma-aminobutyric acid signaling pathway	1	4	0.25	0.644867	0.765286	1	1	GRLP_DICDI
biological_process	GO:1902610	response to N-phenylthiourea	1	2	0.5	0.907696	0.515452	1	1	GRLJ_DICDI
biological_process	GO:0061077	chaperone-mediated protein folding	1	7	0.142857	0.401346	0.774326	1	1	Q54QI6_DICDI
biological_process	GO:1905362	negative regulation of endosomal vesicle fusion	1	1	1	1	0.303878	1	1	LVSB_DICDI
biological_process	GO:0006097	glyoxylate cycle	1	6	0.166667	0.411735	0.88634	1	1	Q54RR4_DICDI
biological_process	GO:0006259	DNA metabolic process	1	1	1	0.989171	0.0148741	1	1	MMS19_DICDI
biological_process	GO:0097428	protein maturation by iron-sulfur cluster transfer	1	6	0.166667	0.188974	0.961721	1	1	MMS19_DICDI
biological_process	GO:0006574	valine catabolic process	1	10	0.1	0.143134	0.973372	1	1	Q55GN0_DICDI
biological_process	GO:0000912	assembly of actomyosin apparatus involved in cytokinesis	1	1	1	1	0.0280265	1	1	KIF12_DICDI
biological_process	GO:0051231	spindle elongation	1	1	1	0.991494	0.0865873	1	1	KIF13_DICDI
biological_process	GO:0000266	mitochondrial fission	1	3	0.333333	0.520215	0.836661	1	1	CLU_DICDI
biological_process	GO:0033615	mitochondrial proton-transporting ATP synthase complex assembly	1	5	0.2	0.520215	0.836661	1	1	Q557F3_DICDI
biological_process	GO:0006526	arginine biosynthetic process	1	5	0.2	0.520215	0.836661	1	1	Q555V8_DICDI
biological_process	GO:0034599	cellular response to oxidative stress	1	19	0.0526316	0.156399	0.915028	1	1	LONM1_DICDI
biological_process	GO:0070407	oxidation-dependent protein catabolic process	1	2	0.5	0.907696	0.515452	1	1	LONM1_DICDI
biological_process	GO:0006695	cholesterol biosynthetic process	1	10	0.1	0.143134	0.973372	1	1	HMDH1_DICDI
biological_process	GO:0031268	pseudopodium organization	1	4	0.25	0.894883	0.200999	1	1	Q86KX8_DICDI
biological_process	GO:0006783	heme biosynthetic process	1	10	0.1	0.0805557	0.987117	1	1	FRDA_DICDI
biological_process	GO:0034729	histone H3-K79 methylation	1	1	1	1	0.303878	1	1	DOT1L_DICDI
biological_process	GO:2000677	regulation of transcription regulatory region DNA binding	1	1	1	1	0.303878	1	1	DOT1L_DICDI
biological_process	GO:0031509	subtelomeric heterochromatin assembly	1	1	1	1	0.303878	1	1	DOT1L_DICDI
biological_process	GO:0006287	base-excision repair, gap-filling	1	2	0.5	0.907696	0.515452	1	1	DPOE1_DICDI
biological_process	GO:0045004	DNA replication proofreading	1	2	0.5	0.907696	0.515452	1	1	DPOE1_DICDI
biological_process	GO:0000388	spliceosome conformational change to release U4 (or U4atac) and U1 (or U11)	1	1	1	1	0.303878	1	1	HELCL_DICDI
biological_process	GO:0032434	regulation of proteasomal ubiquitin-dependent protein catabolic process	1	2	0.5	0.661525	0.505301	1	1	UFL1_DICDI
biological_process	GO:0000350	generation of catalytic spliceosome for second transesterification step	1	2	0.5	0.907696	0.515452	1	1	Q8MML7_DICDI
biological_process	GO:0006020	inositol metabolic process	1	2	0.5	0.411735	0.88634	1	1	IREA_DICDI
biological_process	GO:0010226	response to lithium ion	1	5	0.2	0.63829	0.678887	1	1	Q55AP4_DICDI
biological_process	GO:0051304	chromosome separation	1	1	1	0.994077	0.0154636	1	1	MPS1_DICDI
biological_process	GO:0033316	meiotic spindle assembly checkpoint signaling	1	1	1	1	0.303878	1	1	MPS1_DICDI
biological_process	GO:0034501	protein localization to kinetochore	1	2	0.5	0.907696	0.515452	1	1	MPS1_DICDI
biological_process	GO:0009435	NAD biosynthetic process	1	4	0.25	0.321113	0.920916	1	1	NADC_DICDI
biological_process	GO:0000413	protein peptidyl-prolyl isomerization	1	15	0.0666667	0.0328035	0.995667	1	1	Q54QI6_DICDI
biological_process	GO:0045050	protein insertion into ER membrane by stop-transfer membrane-anchor sequence	1	4	0.25	0.644867	0.765286	1	1	EMC6_DICDI
biological_process	GO:0071816	tail-anchored membrane protein insertion into ER membrane	1	3	0.333333	0.77914	0.662748	1	1	EMC6_DICDI
biological_process	GO:0006627	protein processing involved in protein targeting to mitochondrion	1	6	0.166667	0.411735	0.88634	1	1	MPPA1_DICDI
biological_process	GO:0106072	negative regulation of adenylate cyclase-activating G protein-coupled receptor signaling pathway	1	2	0.5	0.907696	0.515452	1	1	Q54L33_DICDI
biological_process	GO:0010754	negative regulation of cGMP-mediated signaling	1	2	0.5	0.907696	0.515452	1	1	CTNA_DICDI
biological_process	GO:0061123	negative regulation of positive chemotaxis to cAMP	1	2	0.5	0.907696	0.515452	1	1	RCKA_DICDI
biological_process	GO:0031036	myosin II filament assembly	1	2	0.5	0.936107	0.148853	1	1	PAKA_DICDI
biological_process	GO:0006480	N-terminal protein amino acid methylation	1	2	0.5	0.907696	0.515452	1	1	NTM1_DICDI
biological_process	GO:0055129	L-proline biosynthetic process	1	3	0.333333	0.77914	0.662748	1	1	P5CR1_DICDI
biological_process	GO:0031507	heterochromatin assembly	1	7	0.142857	0.920791	0.184266	1	1	EAF3_DICDI
biological_process	GO:0072507	divalent inorganic cation homeostasis	1	1	1	0.24195	0.873898	1	1	HD_DICDI
biological_process	GO:0035864	response to potassium ion	1	2	0.5	0.907696	0.515452	1	1	HD_DICDI
biological_process	GO:0097231	cell motility in response to calcium ion	1	1	1	1	0.303878	1	1	IPLA_DICDI
biological_process	GO:0034670	chemotaxis to arachidonic acid	1	1	1	1	0.303878	1	1	IPLA_DICDI
biological_process	GO:0051209	release of sequestered calcium ion into cytosol	1	1	1	0.77914	0.662748	1	1	IPLA_DICDI
biological_process	GO:0035304	regulation of protein dephosphorylation	1	1	1	0.949893	0.156803	1	1	EPN_DICDI
biological_process	GO:0000086	G2/M transition of mitotic cell cycle	1	1	1	0.976881	0.0824926	1	1	MPIP_DICDI
biological_process	GO:0010971	positive regulation of G2/M transition of mitotic cell cycle	1	1	1	1	0.303878	1	1	MPIP_DICDI
biological_process	GO:0110032	positive regulation of G2/MI transition of meiotic cell cycle	1	1	1	1	0.303878	1	1	MPIP_DICDI
biological_process	GO:0015940	pantothenate biosynthetic process	1	2	0.5	0.907696	0.515452	1	1	Q54LH3_DICDI
biological_process	GO:0048024	regulation of mRNA splicing, via spliceosome	1	2	0.5	0.971973	0.22086	1	1	BBP_DICDI
biological_process	GO:0051096	positive regulation of helicase activity	1	1	1	1	0.303878	1	1	MSH3_DICDI
biological_process	GO:0000735	removal of nonhomologous ends	1	1	1	1	0.303878	1	1	MSH3_DICDI
biological_process	GO:0007099	centriole replication	1	3	0.333333	0.77914	0.662748	1	1	Q54NE5_DICDI
biological_process	GO:1905786	positive regulation of anaphase-promoting complex-dependent catabolic process	1	2	0.5	0.907696	0.515452	1	1	CDH1_DICDI
biological_process	GO:2000641	regulation of early endosome to late endosome transport	1	2	0.5	0.907696	0.515452	1	1	Q54LZ3_DICDI
biological_process	GO:0043944	negative regulation of asexual sporulation resulting in formation of a cellular spore	1	1	1	1	0.303878	1	1	DIMA_DICDI
biological_process	GO:0051453	regulation of intracellular pH	1	5	0.2	0.656655	0.521938	1	1	PMA1_DICDI
biological_process	GO:0006398	mRNA 3'-end processing by stem-loop binding and cleavage	1	5	0.2	0.520215	0.836661	1	1	CPSF2_DICDI
biological_process	GO:0000338	protein deneddylation	1	5	0.2	0.520215	0.836661	1	1	CSN5_DICDI
biological_process	GO:0006171	cAMP biosynthetic process	1	3	0.333333	0.77914	0.662748	1	1	CYAD_DICDI
biological_process	GO:0000916	actomyosin contractile ring contraction	1	3	0.333333	0.77914	0.662748	1	1	Q75JH9_DICDI
biological_process	GO:0036089	cleavage furrow formation	1	2	0.5	0.644867	0.765286	1	1	SEPA_DICDI
biological_process	GO:0045184	establishment of protein localization	1	6	0.166667	0.94106	0.0723755	1	1	DIMB_DICDI
biological_process	GO:0051495	positive regulation of cytoskeleton organization	1	5	0.2	0.0707687	0.965757	1	1	PFD2_DICDI
biological_process	GO:1990481	mRNA pseudouridine synthesis	1	5	0.2	0.520215	0.836661	1	1	Q54FA0_DICDI
biological_process	GO:0051344	negative regulation of cyclic-nucleotide phosphodiesterase activity	1	2	0.5	0.907696	0.515452	1	1	DHKA_DICDI
biological_process	GO:0065003	protein-containing complex assembly	1	4	0.25	0.146581	0.878782	1	1	Q556J3_DICDI
biological_process	GO:0034213	quinolinate catabolic process	1	1	1	1	0.303878	1	1	NADC_DICDI
biological_process	GO:0098727	maintenance of cell number	1	1	1	1	0.303878	1	1	CTNA_DICDI
biological_process	GO:0040015	negative regulation of multicellular organism growth	1	1	1	1	0.303878	1	1	CTNA_DICDI
biological_process	GO:0106071	positive regulation of adenylate cyclase-activating G protein-coupled receptor signaling pathway	1	2	0.5	0.907696	0.515452	1	1	CTNA_DICDI
biological_process	GO:0032114	regulation of glucose-6-phosphatase activity	1	2	0.5	0.907696	0.515452	1	1	CTNA_DICDI
biological_process	GO:0006110	regulation of glycolytic process	1	1	1	1	0.303878	1	1	CTNA_DICDI
biological_process	GO:0000302	response to reactive oxygen species	1	5	0.2	0.103729	0.954036	1	1	ROCO4_DICDI
biological_process	GO:0006414	translational elongation	1	14	0.0714286	0.485824	0.641816	1	1	Q54D77_DICDI
biological_process	GO:0006625	protein targeting to peroxisome	1	4	0.25	0.480505	0.756647	1	1	PEX14_DICDI
biological_process	GO:0034474	U2 snRNA 3'-end processing	1	1	1	1	0.303878	1	1	INT1_DICDI
biological_process	GO:0005978	glycogen biosynthetic process	1	2	0.5	0.907696	0.515452	1	1	GYS_DICDI
biological_process	GO:0016139	glycoside catabolic process	1	4	0.25	0.644867	0.765286	1	1	Q54EG4_DICDI
biological_process	GO:0046477	glycosylceramide catabolic process	1	2	0.5	0.907696	0.515452	1	1	Q54EG4_DICDI
biological_process	GO:0009311	oligosaccharide metabolic process	1	4	0.25	0.321113	0.920916	1	1	Q54EG4_DICDI
biological_process	GO:0006000	fructose metabolic process	1	6	0.166667	0.411735	0.88634	1	1	Q54Q47_DICDI
biological_process	GO:2000060	positive regulation of ubiquitin-dependent protein catabolic process	1	1	1	0.711016	0.451917	1	1	CCD22_DICDI
biological_process	GO:0015986	ATP synthesis coupled proton transport	1	9	0.111111	0.107689	0.981478	1	1	MYBO_DICDI
biological_process	GO:0050764	regulation of phagocytosis	1	4	0.25	0.287	0.830929	1	1	ELMOA_DICDI
biological_process	GO:0006743	ubiquinone metabolic process	1	2	0.5	0.0672713	0.976628	1	1	DPS1_DICDI
biological_process	GO:0032088	negative regulation of NF-kappaB transcription factor activity	1	2	0.5	0.907696	0.515452	1	1	ANM2_DICDI
biological_process	GO:0045787	positive regulation of cell cycle	1	1	1	0.972279	0.0792085	1	1	CWC2_DICDI
biological_process	GO:0033120	positive regulation of RNA splicing	1	1	1	1	0.0923045	1	1	CWC2_DICDI
biological_process	GO:0016125	sterol metabolic process	1	4	0.25	0.0139088	0.996701	0.991	1	UGT52_DICDI
biological_process	GO:0010738	regulation of protein kinase A signaling	1	3	0.333333	0.77914	0.662748	1	1	DHKL_DICDI
biological_process	GO:0006388	tRNA splicing, via endonucleolytic cleavage and ligation	1	5	0.2	0.188974	0.961721	1	1	CLP1_DICDI
biological_process	GO:0001667	ameboidal-type cell migration	1	2	0.5	0.77914	0.662748	1	1	COROB_DICDI
biological_process	GO:0071028	nuclear mRNA surveillance	1	6	0.166667	0.558171	0.697359	1	1	Q55BB0_DICDI
biological_process	GO:0071035	nuclear polyadenylation-dependent rRNA catabolic process	1	6	0.166667	0.411735	0.88634	1	1	Q55AW0_DICDI
biological_process	GO:0071038	nuclear polyadenylation-dependent tRNA catabolic process	1	6	0.166667	0.411735	0.88634	1	1	Q55AW0_DICDI
biological_process	GO:0034427	nuclear-transcribed mRNA catabolic process, exonucleolytic, 3'-5'	1	11	0.0909091	0.243353	0.919444	1	1	Q55BB0_DICDI
biological_process	GO:0034475	U4 snRNA 3'-end processing	1	8	0.125	0.247518	0.944977	1	1	Q55BB0_DICDI
biological_process	GO:0046579	positive regulation of Ras protein signal transduction	1	9	0.111111	0.188974	0.961721	1	1	Q55G82_DICDI
biological_process	GO:0019563	glycerol catabolic process	1	5	0.2	0.520215	0.836661	1	1	GLPK_DICDI
biological_process	GO:0046167	glycerol-3-phosphate biosynthetic process	1	2	0.5	0.907696	0.515452	1	1	GLPK_DICDI
biological_process	GO:0006641	triglyceride metabolic process	1	2	0.5	0.720858	0.547579	1	1	GLPK_DICDI
biological_process	GO:0001708	cell fate specification	1	3	0.333333	0.644867	0.765286	1	1	Q550K3_DICDI
biological_process	GO:0043938	positive regulation of sporulation	1	2	0.5	0.971973	0.22086	1	1	CRTF_DICDI
biological_process	GO:0110013	positive regulation of aggregation involved in sorocarp development	1	1	1	1	0.303878	1	1	GBF_DICDI
biological_process	GO:0031033	myosin filament organization	1	2	0.5	0.857212	0.242847	1	1	Q551V8_DICDI
biological_process	GO:0016045	detection of bacterium	1	2	0.5	0.907696	0.515452	1	1	VP13F_DICDI
biological_process	GO:0009142	nucleoside triphosphate biosynthetic process	1	4	0.25	0.00795982	0.998634	0.905	1	RTPR_DICDI
biological_process	GO:0010942	positive regulation of cell death	1	1	1	1	0.0923045	1	1	DMTA_DICDI
biological_process	GO:0006012	galactose metabolic process	1	4	0.25	0.520215	0.836661	1	1	Q54B24_DICDI
biological_process	GO:0036085	GDP-fucose import into Golgi lumen	1	1	1	1	0.303878	1	1	FUCT1_DICDI
biological_process	GO:0036066	protein O-linked fucosylation	1	1	1	1	0.303878	1	1	FUCT1_DICDI
biological_process	GO:0006491	N-glycan processing	1	7	0.142857	0.5419	0.752482	1	1	Q55BK1_DICDI
biological_process	GO:1905161	protein localization to phagocytic vesicle	1	1	1	0.77914	0.662748	1	1	FYV1_DICDI
biological_process	GO:0006640	monoacylglycerol biosynthetic process	1	2	0.5	0.907696	0.515452	1	1	DGAT1_DICDI
biological_process	GO:0010390	histone monoubiquitination	1	1	1	1	0.303878	1	1	BRE1_DICDI
biological_process	GO:0006694	steroid biosynthetic process	1	8	0.125	0.0101519	0.997281	0.964	1	C519C_DICDI
biological_process	GO:0016578	histone deubiquitination	1	2	0.5	0.907696	0.515452	1	1	Q54JM6_DICDI
biological_process	GO:0006290	pyrimidine dimer repair	1	1	1	1	0.303878	1	1	MSH6_DICDI
biological_process	GO:0045116	protein neddylation	1	8	0.125	0.247518	0.944977	1	1	UBC12_DICDI
biological_process	GO:0030026	cellular manganese ion homeostasis	1	4	0.25	0.644867	0.765286	1	1	NRAM2_DICDI
biological_process	GO:1903988	iron ion export across plasma membrane	1	2	0.5	0.907696	0.515452	1	1	NRAM2_DICDI
biological_process	GO:0055072	iron ion homeostasis	1	2	0.5	0.480505	0.756647	1	1	NRAM2_DICDI
biological_process	GO:0006826	iron ion transport	1	1	1	0.77914	0.662748	1	1	NRAM2_DICDI
biological_process	GO:0016560	protein import into peroxisome matrix, docking	1	3	0.333333	0.77914	0.662748	1	1	PEX14_DICDI
biological_process	GO:0045921	positive regulation of exocytosis	1	2	0.5	0.907696	0.515452	1	1	PAXB_DICDI
biological_process	GO:0007088	regulation of mitotic nuclear division	1	1	1	0.9922	0.027721	1	1	NUCMR_DICDI
biological_process	GO:0097309	cap1 mRNA methylation	1	2	0.5	0.907696	0.515452	1	1	MTR1_DICDI
biological_process	GO:0080009	mRNA methylation	1	1	1	0.907696	0.515452	1	1	MTR1_DICDI
biological_process	GO:0043248	proteasome assembly	1	8	0.125	0.143134	0.973372	1	1	Q54JJ7_DICDI
biological_process	GO:0051293	establishment of spindle localization	1	1	1	0.77914	0.662748	1	1	DYHC_DICDI
biological_process	GO:0007097	nuclear migration	1	1	1	1	0.0923045	1	1	DYHC_DICDI
biological_process	GO:0002926	tRNA wobble base 5-methoxycarbonylmethyl-2-thiouridinylation	1	2	0.5	0.907696	0.515452	1	1	Q54Q66_DICDI
biological_process	GO:0050921	positive regulation of chemotaxis	1	2	0.5	0.452421	0.811026	1	1	RCKA_DICDI
biological_process	GO:0048468	cell development	1	1	1	0.913413	0.355133	1	1	HBX3_DICDI
biological_process	GO:0006086	acetyl-CoA biosynthetic process from pyruvate	1	4	0.25	0.644867	0.765286	1	1	ODP2_DICDI
biological_process	GO:0051292	nuclear pore complex assembly	1	1	1	1	0.303878	1	1	NUP98_DICDI
biological_process	GO:0051754	meiotic sister chromatid cohesion, centromeric	1	1	1	1	0.303878	1	1	BUB1_DICDI
biological_process	GO:0000390	spliceosomal complex disassembly	1	2	0.5	0.907696	0.515452	1	1	TFP11_DICDI
biological_process	GO:0008611	ether lipid biosynthetic process	1	2	0.5	0.907696	0.515452	1	1	DGAT1_DICDI
biological_process	GO:0006296	nucleotide-excision repair, DNA incision, 5'-to lesion	1	3	0.333333	0.77914	0.662748	1	1	XPF_DICDI
biological_process	GO:0090522	vesicle tethering involved in exocytosis	1	2	0.5	0.77914	0.662748	1	1	EXOC4_DICDI
biological_process	GO:0031284	positive regulation of guanylate cyclase activity	1	2	0.5	0.907696	0.515452	1	1	RIP3_DICDI
biological_process	GO:0061939	c-di-GMP signaling	1	4	0.25	0.644867	0.765286	1	1	KAPC_DICDI
biological_process	GO:0031271	lateral pseudopodium assembly	1	3	0.333333	0.77914	0.662748	1	1	GBPD_DICDI
biological_process	GO:0006469	negative regulation of protein kinase activity	1	4	0.25	0.946535	0.138303	1	1	KAPC_DICDI
biological_process	GO:0006817	phosphate ion transport	1	6	0.166667	0.247518	0.944977	1	1	SPXS3_DICDI
biological_process	GO:0070588	calcium ion transmembrane transport	1	8	0.125	0.193835	0.94004	1	1	Q54YQ8_DICDI
biological_process	GO:0010507	negative regulation of autophagy	1	4	0.25	0.520215	0.836661	1	1	NDUF5_DICDI
biological_process	GO:0010498	proteasomal protein catabolic process	1	14	0.0714286	0.865903	0.172824	1	1	PSB4_DICDI
biological_process	GO:0071456	cellular response to hypoxia	1	2	0.5	0.907696	0.515452	1	1	BIP1_DICDI
biological_process	GO:0015693	magnesium ion transport	1	3	0.333333	0.77914	0.662748	1	1	Q553K8_DICDI
biological_process	GO:0018279	protein N-linked glycosylation via asparagine	1	5	0.2	0.520215	0.836661	1	1	Q54MP1_DICDI
biological_process	GO:0046338	phosphatidylethanolamine catabolic process	1	7	0.142857	0.321113	0.920916	1	1	PLBLB_DICDI
biological_process	GO:0031161	phosphatidylinositol catabolic process	1	7	0.142857	0.321113	0.920916	1	1	PLBLB_DICDI
biological_process	GO:0009395	phospholipid catabolic process	1	7	0.142857	0.571517	0.656829	1	1	PLBLB_DICDI
biological_process	GO:0006799	polyphosphate biosynthetic process	1	1	1	1	0.303878	1	1	PPK1_DICDI
biological_process	GO:0006797	polyphosphate metabolic process	1	1	1	1	0.303878	1	1	PPK1_DICDI
biological_process	GO:0006501	C-terminal protein lipidation	1	3	0.333333	0.77914	0.662748	1	1	ATG7_DICDI
biological_process	GO:0006121	mitochondrial electron transport, succinate to ubiquinone	1	4	0.25	0.644867	0.765286	1	1	Q54YN1_DICDI
biological_process	GO:1902369	negative regulation of RNA catabolic process	1	1	1	1	0.0280265	1	1	NRDE2_DICDI
biological_process	GO:0032467	positive regulation of cytokinesis	1	3	0.333333	0.913413	0.355133	1	1	PAKA_DICDI
biological_process	GO:0032092	positive regulation of protein binding	1	1	1	0.957931	0.0981696	1	1	NVL_DICDI
biological_process	GO:0051973	positive regulation of telomerase activity	1	2	0.5	0.907696	0.515452	1	1	NVL_DICDI
biological_process	GO:1904749	regulation of protein localization to nucleolus	1	1	1	1	0.303878	1	1	NVL_DICDI
biological_process	GO:0042149	cellular response to glucose starvation	1	4	0.25	0.644867	0.765286	1	1	Q54Y15_DICDI
biological_process	GO:0032091	negative regulation of protein binding	1	1	1	1	0.303878	1	1	T2FA_DICDI
biological_process	GO:0034461	uropod retraction	1	3	0.333333	0.77914	0.662748	1	1	PTEN_DICDI
biological_process	GO:0000973	posttranscriptional tethering of RNA polymerase II gene DNA at nuclear periphery	1	4	0.25	0.644867	0.765286	1	1	Q75JS7_DICDI
biological_process	GO:0042256	mature ribosome assembly	1	4	0.25	0.644867	0.765286	1	1	Q54WF2_DICDI
biological_process	GO:0001514	selenocysteine incorporation	1	3	0.333333	0.77914	0.662748	1	1	Q54WY4_DICDI
biological_process	GO:0097056	selenocysteinyl-tRNA(Sec) biosynthetic process	1	2	0.5	0.907696	0.515452	1	1	SYSC_DICDI
biological_process	GO:0034220	ion transmembrane transport	1	1	1	0.000654165	0.999756	0.159	1	PMA1_DICDI
biological_process	GO:0120029	proton export across plasma membrane	1	1	1	1	0.303878	1	1	PMA1_DICDI
biological_process	GO:0009263	deoxyribonucleotide biosynthetic process	1	3	0.333333	0.247518	0.944977	1	1	RIR1_DICDI
biological_process	GO:0016925	protein sumoylation	1	9	0.111111	0.188974	0.961721	1	1	Q55FZ7_DICDI
biological_process	GO:0000349	generation of catalytic spliceosome for first transesterification step	1	2	0.5	0.907696	0.515452	1	1	SYF1_DICDI
biological_process	GO:0016320	endoplasmic reticulum membrane fusion	1	1	1	1	0.303878	1	1	SEY1_DICDI
biological_process	GO:0030643	cellular phosphate ion homeostasis	1	1	1	1	0.303878	1	1	SPXS3_DICDI
biological_process	GO:0016036	cellular response to phosphate starvation	1	4	0.25	0.644867	0.765286	1	1	SPXS3_DICDI
biological_process	GO:0006428	isoleucyl-tRNA aminoacylation	1	2	0.5	0.907696	0.515452	1	1	SYIM_DICDI
biological_process	GO:0000372	Group I intron splicing	1	1	1	1	0.303878	1	1	SYLM_DICDI
biological_process	GO:0140028	pore formation during contractile vacuole discharge	1	2	0.5	0.907696	0.515452	1	1	C7FZZ0_DICDI
biological_process	GO:0000183	rDNA heterochromatin assembly	1	1	1	1	0.303878	1	1	RRP8_DICDI
biological_process	GO:0018026	peptidyl-lysine monomethylation	1	8	0.125	0.247518	0.944977	1	1	Q54TU0_DICDI
biological_process	GO:0050793	regulation of developmental process	1	10	0.1	0.647691	0.419285	1	1	SPKA_DICDI
biological_process	GO:0042274	ribosomal small subunit biogenesis	1	5	0.2	4.15261e-05	0.999993	0.006	1	Q54PG9_DICDI
biological_process	GO:0031247	actin rod assembly	1	1	1	1	0.303878	1	1	SRFA_DICDI
biological_process	GO:0030259	lipid glycosylation	1	3	0.333333	0.77914	0.662748	1	1	UGT52_DICDI
biological_process	GO:0006431	methionyl-tRNA aminoacylation	1	2	0.5	0.907696	0.515452	1	1	SYMC_DICDI
biological_process	GO:0006418	tRNA aminoacylation for protein translation	1	1	1	0.28952	0.819201	1	1	SYMC_DICDI
biological_process	GO:0006116	NADH oxidation	1	4	0.25	0.644867	0.765286	1	1	Q86AE2_DICDI
biological_process	GO:0070873	regulation of glycogen metabolic process	1	2	0.5	0.907696	0.515452	1	1	Q54Q47_DICDI
biological_process	GO:0009749	response to glucose	1	2	0.5	0.321113	0.920916	1	1	Q54Q47_DICDI
biological_process	GO:0032868	response to insulin	1	2	0.5	0.907696	0.515452	1	1	Q54Q47_DICDI
biological_process	GO:0009744	response to sucrose	1	2	0.5	0.907696	0.515452	1	1	Q54Q47_DICDI
biological_process	GO:0006144	purine nucleobase metabolic process	1	4	0.25	0.0241338	0.996988	0.999	1	PURCE_DICDI
biological_process	GO:1990592	protein K69-linked ufmylation	1	3	0.333333	0.77914	0.662748	1	1	UFL1_DICDI
biological_process	GO:0016539	intein-mediated protein splicing	1	1	1	1	0.303878	1	1	RPC2_DICDI
biological_process	GO:0071712	ER-associated misfolded protein catabolic process	1	4	0.25	0.644867	0.765286	1	1	Q54ND8_DICDI
biological_process	GO:0006648	dihydrosphingosine-1-P pathway	1	2	0.5	0.907696	0.515452	1	1	SPHKA_DICDI
biological_process	GO:0006635	fatty acid beta-oxidation	1	16	0.0625	0.00443549	0.999292	0.743	1	Q86A74_DICDI
biological_process	GO:0071468	cellular response to acidic pH	1	1	1	1	0.0923045	1	1	IMPCT_DICDI
biological_process	GO:0060548	negative regulation of cell death	1	1	1	0.997419	0.0322087	1	1	IMPCT_DICDI
biological_process	GO:0019287	isopentenyl diphosphate biosynthetic process, mevalonate pathway	1	3	0.333333	0.77914	0.662748	1	1	KIME_DICDI
biological_process	GO:0045022	early endosome to late endosome transport	1	2	0.5	0.913413	0.355133	1	1	Y5897_DICDI
biological_process	GO:0006352	DNA-templated transcription, initiation	1	6	0.166667	0.84834	0.238524	1	1	Q86I37_DICDI
biological_process	GO:0034968	histone lysine methylation	1	11	0.0909091	0.656655	0.521938	1	1	Q54XN6_DICDI
biological_process	GO:0048211	Golgi vesicle docking	1	2	0.5	0.907696	0.515452	1	1	Q553R1_DICDI
biological_process	GO:0019505	resorcinol metabolic process	1	1	1	1	0.303878	1	1	PKS1_DICDI
biological_process	GO:0009372	quorum sensing	1	2	0.5	0.907696	0.515452	1	1	Y1197_DICDI
biological_process	GO:0036051	protein localization to trailing edge	1	2	0.5	0.907696	0.515452	1	1	PTEN_DICDI
biological_process	GO:0036052	protein localization to uropod	1	1	1	1	0.303878	1	1	PTEN_DICDI
biological_process	GO:0006829	zinc ion transport	1	4	0.25	0.302641	0.892311	1	1	Y9332_DICDI
biological_process	GO:0006975	DNA damage induced protein phosphorylation	1	1	1	1	0.303878	1	1	PRKDC_DICDI
biological_process	GO:1902635	1-phosphatidyl-1D-myo-inositol 4,5-bisphosphate biosynthetic process	1	1	1	1	0.303878	1	1	Y7588_DICDI
biological_process	GO:0035352	NAD transmembrane transport	1	1	1	1	0.303878	1	1	MCFW_DICDI
biological_process	GO:1904893	negative regulation of receptor signaling pathway via STAT	1	1	1	1	0.303878	1	1	PTP3_DICDI
biological_process	GO:0070072	vacuolar proton-transporting V-type ATPase complex assembly	1	4	0.25	0.644867	0.765286	1	1	Y4788_DICDI
biological_process	GO:0000244	spliceosomal tri-snRNP complex assembly	1	4	0.25	0.644867	0.765286	1	1	Q55A15_DICDI
biological_process	GO:0031340	positive regulation of vesicle fusion	1	2	0.5	0.907696	0.515452	1	1	Q55DS5_DICDI
biological_process	GO:0000479	endonucleolytic cleavage of tricistronic rRNA transcript (SSU-rRNA, 5.8S rRNA, LSU-rRNA)	1	3	0.333333	0.302641	0.892311	1	1	RCL1_DICDI
biological_process	GO:0006409	tRNA export from nucleus	1	2	0.5	0.907696	0.515452	1	1	Q54EN2_DICDI
biological_process	GO:0018230	peptidyl-L-cysteine S-palmitoylation	1	12	0.0833333	0.0805557	0.987117	1	1	Q550I3_DICDI
biological_process	GO:0006282	regulation of DNA repair	1	2	0.5	0.831845	0.479785	1	1	WRIP1_DICDI
biological_process	GO:0048284	organelle fusion	1	2	0.5	0.317593	0.777367	1	1	Q55CS3_DICDI
biological_process	GO:0140285	endosome fission	1	1	1	1	0.303878	1	1	WASC5_DICDI
biological_process	GO:0043933	protein-containing complex organization	1	1	1	0.383398	0.657585	1	1	WASC5_DICDI
biological_process	GO:0051125	regulation of actin nucleation	1	1	1	0.737174	0.588265	1	1	WASC5_DICDI
biological_process	GO:0071577	zinc ion transmembrane transport	1	9	0.111111	0.188974	0.961721	1	1	ZNTB_DICDI
biological_process	GO:0006419	alanyl-tRNA aminoacylation	1	2	0.5	0.907696	0.515452	1	1	SYAM_DICDI
biological_process	GO:0110014	negative regulation of aggregation involved in sorocarp development	1	1	1	1	0.303878	1	1	Y1197_DICDI
biological_process	GO:1904007	positive regulation of phospholipase D activity	1	1	1	1	0.303878	1	1	Y1197_DICDI
biological_process	GO:0070373	negative regulation of ERK1 and ERK2 cascade	1	1	1	1	0.303878	1	1	Y7071_DICDI
biological_process	GO:1900424	regulation of defense response to bacterium	1	1	1	0.907696	0.515452	1	1	Y7071_DICDI
biological_process	GO:0048280	vesicle fusion with Golgi apparatus	1	3	0.333333	0.77914	0.662748	1	1	Q553R1_DICDI
biological_process	GO:0043162	ubiquitin-dependent protein catabolic process via the multivesicular body sorting pathway	1	1	1	0.988429	0.0734842	1	1	VPS37_DICDI
biological_process	GO:0030071	regulation of mitotic metaphase/anaphase transition	1	2	0.5	0.986161	0.0433383	1	1	CDC26_DICDI
biological_process	GO:0036010	protein localization to endosome	1	1	1	1	0.303878	1	1	WASC2_DICDI
biological_process	GO:0009234	menaquinone biosynthetic process	1	5	0.2	0.520215	0.836661	1	1	UBIA1_DICDI
biological_process	GO:0032194	ubiquinone biosynthetic process via 3,4-dihydroxy-5-polyprenylbenzoate	1	5	0.2	0.520215	0.836661	1	1	UBIA1_DICDI
biological_process	GO:0042371	vitamin K biosynthetic process	1	5	0.2	0.520215	0.836661	1	1	UBIA1_DICDI
biological_process	GO:0051103	DNA ligation involved in DNA repair	1	2	0.5	0.971973	0.22086	1	1	DNLI4_DICDI
biological_process	GO:0010165	response to X-ray	1	2	0.5	0.991494	0.0865873	1	1	Q86HD8_DICDI
biological_process	GO:0006624	vacuolar protein processing	1	1	1	1	0.303878	1	1	TM208_DICDI
biological_process	GO:0071260	cellular response to mechanical stimulus	1	1	1	1	0.303878	1	1	Y2801_DICDI
biological_process	GO:0042391	regulation of membrane potential	1	1	1	0.933765	0.173237	1	1	Y2801_DICDI
biological_process	GO:0030007	cellular potassium ion homeostasis	1	3	0.333333	0.77914	0.662748	1	1	Y2412_DICDI
biological_process	GO:1990573	potassium ion import across plasma membrane	1	3	0.333333	0.77914	0.662748	1	1	Y2412_DICDI
biological_process	GO:0038202	TORC1 signaling	1	2	0.5	0.639298	0.627669	1	1	Q54UN5_DICDI
biological_process	GO:0045040	protein insertion into mitochondrial outer membrane	1	4	0.25	0.644867	0.765286	1	1	Q553N9_DICDI
biological_process	GO:0045724	positive regulation of cilium assembly	1	1	1	1	0.303878	1	1	Y4579_DICDI
biological_process	GO:1903566	positive regulation of protein localization to cilium	1	1	1	1	0.303878	1	1	Y4579_DICDI
biological_process	GO:1901255	nucleotide-excision repair involved in interstrand cross-link repair	1	1	1	1	0.303878	1	1	XPF_DICDI
biological_process	GO:1903894	regulation of IRE1-mediated unfolded protein response	1	1	1	1	0.303878	1	1	IREA_DICDI
biological_process	GO:0030031	cell projection assembly	1	3	0.333333	0.986194	0.02671	1	1	Q552K7_DICDI
biological_process	GO:0035329	hippo signaling	1	1	1	1	0.0923045	1	1	SVKA_DICDI
biological_process	GO:0051781	positive regulation of cell division	1	1	1	0.913413	0.355133	1	1	SVKA_DICDI
biological_process	GO:1903438	positive regulation of mitotic cytokinetic process	1	1	1	1	0.303878	1	1	SVKA_DICDI
biological_process	GO:0016559	peroxisome fission	1	3	0.333333	0.77914	0.662748	1	1	Q86AC7_DICDI
biological_process	GO:0044375	regulation of peroxisome size	1	2	0.5	0.907696	0.515452	1	1	Q86AC7_DICDI
biological_process	GO:0000056	ribosomal small subunit export from nucleus	1	4	0.25	0.644867	0.765286	1	1	Q54XC9_DICDI
biological_process	GO:0035437	maintenance of protein localization in endoplasmic reticulum	1	1	1	0.77914	0.662748	1	1	TAPT1_DICDI
biological_process	GO:1903014	cellular response to differentiation-inducing factor 1	1	1	1	1	0.303878	1	1	YELA_DICDI
biological_process	GO:0097510	base-excision repair, AP site formation via deaminated base removal	1	2	0.5	0.907696	0.515452	1	1	Q1ZXM2_DICDI
biological_process	GO:2000146	negative regulation of cell motility	1	2	0.5	0.913413	0.355133	1	1	DRKD_DICDI
biological_process	GO:0051271	negative regulation of cellular component movement	1	2	0.5	0.967791	0.168155	1	1	GEFB_DICDI
biological_process	GO:0045807	positive regulation of endocytosis	1	2	0.5	0.876148	0.286498	1	1	GEFB_DICDI
biological_process	GO:0047496	vesicle transport along microtubule	1	3	0.333333	0.967791	0.168155	1	1	KIF1_DICDI
biological_process	GO:0007231	osmosensory signaling pathway	1	2	0.5	0.971973	0.22086	1	1	Q75JG4_DICDI
biological_process	GO:0000054	ribosomal subunit export from nucleus	1	5	0.2	0.343171	0.846893	1	1	Q54AQ0_DICDI
biological_process	GO:0070192	chromosome organization involved in meiotic cell cycle	1	2	0.5	0.973137	0.103455	1	1	RAD50_DICDI
biological_process	GO:0090305	nucleic acid phosphodiester bond hydrolysis	1	2	0.5	0.885464	0.177953	1	1	RAD50_DICDI
biological_process	GO:0000019	regulation of mitotic recombination	1	1	1	0.907696	0.515452	1	1	RAD50_DICDI
biological_process	GO:0000722	telomere maintenance via recombination	1	1	1	1	0.303878	1	1	RAD50_DICDI
biological_process	GO:2001295	malonyl-CoA biosynthetic process	1	1	1	1	0.303878	1	1	ACAC_DICDI
biological_process	GO:0006490	oligosaccharide-lipid intermediate biosynthetic process	1	4	0.25	0.107689	0.981478	1	1	ALG8_DICDI
biological_process	GO:0071398	cellular response to fatty acid	1	1	1	1	0.303878	1	1	DGKA_DICDI
biological_process	GO:0071285	cellular response to lithium ion	1	2	0.5	0.907696	0.515452	1	1	DGKA_DICDI
biological_process	GO:0046339	diacylglycerol metabolic process	1	1	1	0.907696	0.515452	1	1	DGKA_DICDI
biological_process	GO:0046834	lipid phosphorylation	1	1	1	1	0.303878	1	1	DGKA_DICDI
biological_process	GO:0006654	phosphatidic acid biosynthetic process	1	3	0.333333	0.77914	0.662748	1	1	DGKA_DICDI
biological_process	GO:0007205	protein kinase C-activating G protein-coupled receptor signaling pathway	1	1	1	1	0.303878	1	1	DGKA_DICDI
biological_process	GO:0050926	regulation of positive chemotaxis	1	1	1	0.502117	0.714628	1	1	DGKA_DICDI
biological_process	GO:0060547	negative regulation of necrotic cell death	1	1	1	1	0.303878	1	1	DIMB_DICDI
biological_process	GO:1904359	regulation of spore germination	1	1	1	0.907696	0.515452	1	1	DHKB_DICDI
biological_process	GO:0033058	directional locomotion	1	1	1	1	0.303878	1	1	ARPIN_DICDI
biological_process	GO:0051126	negative regulation of actin nucleation	1	1	1	0.907696	0.515452	1	1	ARPIN_DICDI
biological_process	GO:0035891	exit from host cell	1	1	1	1	0.303878	1	1	ATG1_DICDI
biological_process	GO:0070265	necrotic cell death	1	1	1	1	0.0923045	1	1	ATG1_DICDI
biological_process	GO:1903298	negative regulation of hypoxia-induced intrinsic apoptotic signaling pathway	1	1	1	1	0.303878	1	1	BIP1_DICDI
biological_process	GO:0009062	fatty acid catabolic process	1	2	0.5	0.00359315	0.999273	0.669	1	Q75JA1_DICDI
biological_process	GO:0045881	positive regulation of sporulation resulting in formation of a cellular spore	1	1	1	1	0.303878	1	1	ALIX_DICDI
biological_process	GO:0043066	negative regulation of apoptotic process	1	1	1	0.971973	0.22086	1	1	API5_DICDI
biological_process	GO:0007129	homologous chromosome pairing at meiosis	1	2	0.5	0.971973	0.22086	1	1	Q55F81_DICDI
biological_process	GO:0006539	glutamate catabolic process via 2-oxoglutarate	1	1	1	1	0.303878	1	1	HOT_DICDI
biological_process	GO:0045905	positive regulation of translational termination	1	2	0.5	0.907696	0.515452	1	1	B0G164_DICDI
biological_process	GO:0070536	protein K63-linked deubiquitination	1	1	1	1	0.303878	1	1	D1039_DICDI
biological_process	GO:0140027	contractile vacuole localization	1	1	1	1	0.303878	1	1	MYOJ_DICDI
biological_process	GO:0051661	maintenance of centrosome location	1	2	0.5	0.907696	0.515452	1	1	KIF9_DICDI
biological_process	GO:0007019	microtubule depolymerization	1	1	1	1	0.0923045	1	1	KIF9_DICDI
biological_process	GO:0072386	plus-end-directed organelle transport along microtubule	1	1	1	1	0.303878	1	1	KIF1_DICDI
biological_process	GO:0072383	plus-end-directed vesicle transport along microtubule	1	1	1	1	0.303878	1	1	KIF1_DICDI
biological_process	GO:0042173	regulation of sporulation resulting in formation of a cellular spore	1	1	1	1	0.0280265	1	1	KAPC_DICDI
biological_process	GO:0015936	coenzyme A metabolic process	1	2	0.5	0.781271	0.441829	1	1	HMDH1_DICDI
biological_process	GO:0015741	fumarate transport	1	1	1	1	0.303878	1	1	MCFZ_DICDI
biological_process	GO:0015744	succinate transport	1	1	1	0.907696	0.515452	1	1	MCFZ_DICDI
biological_process	GO:0043433	negative regulation of DNA-binding transcription factor activity	1	1	1	0.907696	0.515452	1	1	ANM2_DICDI
biological_process	GO:0043065	positive regulation of apoptotic process	1	1	1	1	0.303878	1	1	ANM2_DICDI
biological_process	GO:0060765	regulation of androgen receptor signaling pathway	1	1	1	1	0.303878	1	1	ANM2_DICDI
biological_process	GO:0010824	regulation of centrosome duplication	1	2	0.5	0.907696	0.515452	1	1	Q54G01_DICDI
biological_process	GO:0042276	error-prone translesion synthesis	1	6	0.166667	0.411735	0.88634	1	1	Q55AZ3_DICDI
biological_process	GO:0042766	nucleosome mobilization	1	2	0.5	0.907696	0.515452	1	1	Q54DG0_DICDI
biological_process	GO:1900756	protein processing in phagocytic vesicle	1	2	0.5	0.907696	0.515452	1	1	DYNA_DICDI
biological_process	GO:0060151	peroxisome localization	1	1	1	1	0.303878	1	1	DYNB_DICDI
biological_process	GO:1904825	protein localization to microtubule plus-end	1	1	1	1	0.303878	1	1	EB1_DICDI
biological_process	GO:0031110	regulation of microtubule polymerization or depolymerization	1	1	1	0.913413	0.355133	1	1	EB1_DICDI
biological_process	GO:0007234	osmosensory signaling via phosphorelay pathway	1	1	1	1	0.303878	1	1	DOKA_DICDI
biological_process	GO:0036289	peptidyl-serine autophosphorylation	1	1	1	1	0.303878	1	1	DRKD_DICDI
biological_process	GO:0008610	lipid biosynthetic process	1	6	0.166667	0.203481	0.835909	1	1	Q54TY1_DICDI
biological_process	GO:0090160	Golgi to lysosome transport	1	1	1	1	0.303878	1	1	AP4M_DICDI
biological_process	GO:0006306	DNA methylation	1	1	1	1	0.303878	1	1	CMT1_DICDI
biological_process	GO:0032776	DNA methylation on cytosine	1	1	1	1	0.303878	1	1	CMT1_DICDI
biological_process	GO:0010243	response to organonitrogen compound	1	1	1	0.821901	0.236812	1	1	CMT1_DICDI
biological_process	GO:0008053	mitochondrial fusion	1	1	1	0.907696	0.515452	1	1	CLU_DICDI
biological_process	GO:1901096	regulation of autophagosome maturation	1	1	1	1	0.303878	1	1	CL16A_DICDI
biological_process	GO:0080163	regulation of protein serine/threonine phosphatase activity	1	1	1	1	0.303878	1	1	CK2B_DICDI
biological_process	GO:1990451	cellular stress response to acidic pH	1	1	1	1	0.303878	1	1	GCN1_DICDI
biological_process	GO:0071264	positive regulation of translational initiation in response to starvation	1	1	1	1	0.303878	1	1	GCN1_DICDI
biological_process	GO:0035023	regulation of Rho protein signal transduction	1	4	0.25	0.644867	0.765286	1	1	Q550V3_DICDI
biological_process	GO:0050850	positive regulation of calcium-mediated signaling	1	1	1	1	0.303878	1	1	GEFM_DICDI
biological_process	GO:0030032	lamellipodium assembly	1	2	0.5	0.907696	0.515452	1	1	Q54WT5_DICDI
biological_process	GO:0006449	regulation of translational termination	1	1	1	0.971973	0.22086	1	1	GLE1_DICDI
biological_process	GO:1903615	positive regulation of protein tyrosine phosphatase activity	1	1	1	1	0.303878	1	1	CAR4_DICDI
biological_process	GO:0051299	centrosome separation	1	1	1	0.907696	0.515452	1	1	DYIN_DICDI
biological_process	GO:0010970	transport along microtubule	1	1	1	0.988429	0.0734842	1	1	DYIN_DICDI
biological_process	GO:0006335	DNA replication-dependent chromatin assembly	1	4	0.25	0.644867	0.765286	1	1	Q55D32_DICDI
biological_process	GO:0006288	base-excision repair, DNA ligation	1	1	1	1	0.303878	1	1	DNLI3_DICDI
biological_process	GO:0043504	mitochondrial DNA repair	1	2	0.5	0.907696	0.515452	1	1	DNLI3_DICDI
biological_process	GO:1903831	signal transduction involved in cellular response to ammonium ion	1	1	1	1	0.303878	1	1	DHKC_DICDI
biological_process	GO:0051457	maintenance of protein location in nucleus	1	1	1	1	0.303878	1	1	Q557I6_DICDI
biological_process	GO:0009089	lysine biosynthetic process via diaminopimelate	1	6	0.166667	0.411735	0.88634	1	1	Q55GS8_DICDI
biological_process	GO:0015074	DNA integration	1	50	0.02	2.86083e-07	1	0	1	Q55BL0_DICDI
biological_process	GO:0000455	enzyme-directed rRNA pseudouridine synthesis	1	5	0.2	0.520215	0.836661	1	1	Q54VB9_DICDI
biological_process	GO:0019988	charged-tRNA amino acid modification	1	1	1	0.907696	0.515452	1	1	Q54LD0_DICDI
biological_process	GO:0071788	endoplasmic reticulum tubular network maintenance	1	1	1	1	0.303878	1	1	Q54GT5_DICDI
biological_process	GO:1903373	positive regulation of endoplasmic reticulum tubular network organization	1	1	1	1	0.303878	1	1	Q54GT5_DICDI
biological_process	GO:0006283	transcription-coupled nucleotide-excision repair	1	5	0.2	0.520215	0.836661	1	1	Q55EZ8_DICDI
biological_process	GO:0019369	arachidonic acid metabolic process	1	9	0.111111	0.188974	0.961721	1	1	Q54DE7_DICDI
biological_process	GO:0090071	negative regulation of ribosome biogenesis	1	1	1	1	0.303878	1	1	Q54B26_DICDI
biological_process	GO:0043488	regulation of mRNA stability	1	2	0.5	0.991333	0.0229456	1	1	Q55BM8_DICDI
biological_process	GO:0006741	NADP biosynthetic process	1	2	0.5	0.907696	0.515452	1	1	Q54D76_DICDI
biological_process	GO:0018023	peptidyl-lysine trimethylation	1	6	0.166667	0.321113	0.920916	1	1	Q54TU0_DICDI
biological_process	GO:0032367	intracellular cholesterol transport	1	1	1	1	0.303878	1	1	Q54H18_DICDI
biological_process	GO:0006113	fermentation	1	1	1	0.907696	0.515452	1	1	Q54GY7_DICDI
biological_process	GO:0017187	peptidyl-glutamic acid carboxylation	1	1	1	1	0.303878	1	1	C7G026_DICDI
biological_process	GO:0016078	tRNA catabolic process	1	1	1	0.63829	0.678887	1	1	Q54EV0_DICDI
biological_process	GO:0006875	cellular metal ion homeostasis	1	2	0.5	0.198193	0.884606	1	1	Q54Y17_DICDI
biological_process	GO:2000042	negative regulation of double-strand break repair via homologous recombination	1	1	1	1	0.303878	1	1	Q54GC4_DICDI
biological_process	GO:0033045	regulation of sister chromatid segregation	1	1	1	0.994312	0.0187432	1	1	Q54GC4_DICDI
biological_process	GO:0072318	clathrin coat disassembly	1	1	1	1	0.303878	1	1	Q8T867_DICDI
biological_process	GO:0031124	mRNA 3'-end processing	1	2	0.5	0.995933	0.0127228	1	1	Q54XS9_DICDI
biological_process	GO:0050667	homocysteine metabolic process	1	2	0.5	0.520215	0.836661	1	1	Q54L96_DICDI
biological_process	GO:0032786	positive regulation of DNA-templated transcription, elongation	1	4	0.25	0.917507	0.218729	1	1	Q1ZXD7_DICDI
biological_process	GO:0006047	UDP-N-acetylglucosamine metabolic process	1	1	1	0.411735	0.88634	1	1	Q54LK1_DICDI
biological_process	GO:0045732	positive regulation of protein catabolic process	1	2	0.5	0.832849	0.287205	1	1	C7G034_DICDI
biological_process	GO:0071044	histone mRNA catabolic process	1	1	1	1	0.303878	1	1	Q55AW0_DICDI
biological_process	GO:0071040	nuclear polyadenylation-dependent antisense transcript catabolic process	1	1	1	1	0.303878	1	1	Q55AW0_DICDI
biological_process	GO:0071039	nuclear polyadenylation-dependent CUT catabolic process	1	1	1	1	0.303878	1	1	Q55AW0_DICDI
biological_process	GO:0071036	nuclear polyadenylation-dependent snoRNA catabolic process	1	1	1	1	0.303878	1	1	Q55AW0_DICDI
biological_process	GO:0071037	nuclear polyadenylation-dependent snRNA catabolic process	1	1	1	1	0.303878	1	1	Q55AW0_DICDI
biological_process	GO:0046475	glycerophospholipid catabolic process	1	3	0.333333	0.372331	0.856866	1	1	Q54GL1_DICDI
biological_process	GO:0043618	regulation of transcription from RNA polymerase II promoter in response to stress	1	1	1	0.997419	0.0322087	1	1	Q54DG0_DICDI
biological_process	GO:0006637	acyl-CoA metabolic process	1	4	0.25	0.151846	0.932729	1	1	Q54LP9_DICDI
biological_process	GO:0046939	nucleotide phosphorylation	1	2	0.5	0.0301255	0.99204	1	1	Q54S30_DICDI
biological_process	GO:0001680	tRNA 3'-terminal CCA addition	1	2	0.5	0.907696	0.515452	1	1	Q55BE1_DICDI
biological_process	GO:1902004	positive regulation of amyloid-beta formation	1	1	1	1	0.303878	1	1	Q54MT3_DICDI
biological_process	GO:1903259	exon-exon junction complex disassembly	1	1	1	1	0.303878	1	1	Q54R88_DICDI
biological_process	GO:0000493	box H/ACA snoRNP assembly	1	2	0.5	0.907696	0.515452	1	1	Q75JJ6_DICDI
biological_process	GO:0033132	negative regulation of glucokinase activity	1	1	1	1	0.303878	1	1	Q55EQ6_DICDI
biological_process	GO:2000785	regulation of autophagosome assembly	1	2	0.5	0.907696	0.515452	1	1	Q54UN5_DICDI
biological_process	GO:0051569	regulation of histone H3-K4 methylation	1	1	1	1	0.303878	1	1	Q54Y92_DICDI
biological_process	GO:0006643	membrane lipid metabolic process	1	3	0.333333	0.07218	0.956642	1	1	Q54TY1_DICDI
biological_process	GO:0009229	thiamine diphosphate biosynthetic process	1	1	1	1	0.303878	1	1	Q55GR8_DICDI
biological_process	GO:0006772	thiamine metabolic process	1	2	0.5	0.907696	0.515452	1	1	Q55GR8_DICDI
biological_process	GO:1900370	positive regulation of RNA interference	1	1	1	1	0.303878	1	1	Q86L44_DICDI
biological_process	GO:0010792	DNA double-strand break processing involved in repair via single-strand annealing	1	1	1	1	0.303878	1	1	Q54EK9_DICDI
biological_process	GO:1902476	chloride transmembrane transport	1	2	0.5	0.907696	0.515452	1	1	Q54BH1_DICDI
biological_process	GO:0019236	response to pheromone	1	6	0.166667	0.411735	0.88634	1	1	Q8T183_DICDI
biological_process	GO:0042407	cristae formation	1	1	1	1	0.303878	1	1	Q55BP9_DICDI
biological_process	GO:1990918	double-strand break repair involved in meiotic recombination	1	2	0.5	0.907696	0.515452	1	1	Q55F81_DICDI
biological_process	GO:0072684	mitochondrial tRNA 3'-trailer cleavage, endonucleolytic	1	4	0.25	0.644867	0.765286	1	1	B0G112_DICDI
biological_process	GO:0070212	protein poly-ADP-ribosylation	1	6	0.166667	0.411735	0.88634	1	1	Q54E42_DICDI
biological_process	GO:0017038	protein import	1	1	1	0.88256	0.175472	1	1	Q54EQ0_DICDI
biological_process	GO:0035493	SNARE complex assembly	1	2	0.5	0.907696	0.515452	1	1	Q54JC5_DICDI
biological_process	GO:0071988	protein localization to spindle pole body	1	1	1	1	0.303878	1	1	Q54G01_DICDI
biological_process	GO:0065002	intracellular protein transmembrane transport	1	1	1	0.413006	0.734529	1	1	Q55DS5_DICDI
biological_process	GO:0010828	positive regulation of glucose transmembrane transport	1	1	1	1	0.303878	1	1	Q55DS5_DICDI
biological_process	GO:0090314	positive regulation of protein targeting to membrane	1	1	1	1	0.303878	1	1	Q55DS5_DICDI
biological_process	GO:0042245	RNA repair	1	2	0.5	0.907696	0.515452	1	1	Q54WD4_DICDI
biological_process	GO:0070899	mitochondrial tRNA wobble uridine modification	1	1	1	1	0.303878	1	1	Q54HW4_DICDI
biological_process	GO:0070897	transcription preinitiation complex assembly	1	2	0.5	0.901288	0.229131	1	1	Q86I37_DICDI
biological_process	GO:0000481	maturation of 5S rRNA	1	1	1	1	0.303878	1	1	Q54TQ2_DICDI
biological_process	GO:0035067	negative regulation of histone acetylation	1	2	0.5	0.907696	0.515452	1	1	Q54C05_DICDI
biological_process	GO:0035066	positive regulation of histone acetylation	1	3	0.333333	0.77914	0.662748	1	1	Q54C05_DICDI
biological_process	GO:0097745	mitochondrial tRNA 5'-end processing	1	3	0.333333	0.77914	0.662748	1	1	Q54WD4_DICDI
biological_process	GO:0034499	late endosome to Golgi transport	1	1	1	1	0.303878	1	1	Q54UN7_DICDI
biological_process	GO:0043966	histone H3 acetylation	1	3	0.333333	0.644867	0.765286	1	1	Q54SJ7_DICDI
biological_process	GO:0042752	regulation of circadian rhythm	1	1	1	1	0.303878	1	1	Q54SU2_DICDI
biological_process	GO:2000028	regulation of photoperiodism, flowering	1	1	1	1	0.303878	1	1	Q54SU2_DICDI
biological_process	GO:0007130	synaptonemal complex assembly	1	1	1	1	0.303878	1	1	Q550H7_DICDI
biological_process	GO:0051604	protein maturation	1	2	0.5	0.0251684	0.987731	0.999	1	Q54RC1_DICDI
biological_process	GO:0031532	actin cytoskeleton reorganization	1	4	0.25	0.869018	0.36171	1	1	Q54R43_DICDI
biological_process	GO:0042791	5S class rRNA transcription by RNA polymerase III	1	1	1	1	0.303878	1	1	Q54FU1_DICDI
biological_process	GO:0017121	plasma membrane phospholipid scrambling	1	1	1	1	0.303878	1	1	Q54GU6_DICDI
biological_process	GO:0048208	COPII vesicle coating	1	1	1	0.644867	0.765286	1	1	Q55BR0_DICDI
biological_process	GO:0006471	protein ADP-ribosylation	1	2	0.5	0.63829	0.678887	1	1	Q54JP6_DICDI
biological_process	GO:0035330	regulation of hippo signaling	1	1	1	1	0.303878	1	1	Q54RX7_DICDI
biological_process	GO:0045003	double-strand break repair via synthesis-dependent strand annealing	1	1	1	0.913413	0.355133	1	1	Q8T145_DICDI
biological_process	GO:0071932	replication fork reversal	1	1	1	1	0.303878	1	1	Q8T145_DICDI
biological_process	GO:0035973	aggrephagy	1	1	1	1	0.303878	1	1	Q55CE3_DICDI
biological_process	GO:0060628	regulation of ER to Golgi vesicle-mediated transport	1	1	1	0.644867	0.765286	1	1	Q55CJ0_DICDI
biological_process	GO:0000003	reproduction	1	1	1	0.0021824	0.998624	0.505	1	Q54LF4_DICDI
biological_process	GO:0045740	positive regulation of DNA replication	1	1	1	1	0.303878	1	1	Q54WQ3_DICDI
biological_process	GO:0010833	telomere maintenance via telomere lengthening	1	1	1	0.988429	0.0734842	1	1	Q54WQ3_DICDI
biological_process	GO:0035336	long-chain fatty-acyl-CoA metabolic process	1	1	1	1	0.303878	1	1	Q54I12_DICDI
biological_process	GO:0003333	amino acid transmembrane transport	1	2	0.5	0.321113	0.920916	1	1	Q55F74_DICDI
biological_process	GO:0010324	membrane invagination	1	1	1	0.0133199	0.9955	0.988	1	C7FZZ0_DICDI
biological_process	GO:0017004	cytochrome complex assembly	1	1	1	0.285372	0.87996	1	1	Q55DW5_DICDI
biological_process	GO:0017003	protein-heme linkage	1	1	1	0.907696	0.515452	1	1	Q55DW5_DICDI
biological_process	GO:0006363	termination of RNA polymerase I transcription	1	1	1	1	0.303878	1	1	Q54YF5_DICDI
biological_process	GO:0030423	targeting of mRNA for destruction involved in RNA interference	1	1	1	1	0.303878	1	1	Q7KWS3_DICDI
biological_process	GO:1903358	regulation of Golgi organization	1	1	1	1	0.303878	1	1	Q551U4_DICDI
biological_process	GO:0006353	DNA-templated transcription, termination	1	5	0.2	0.808107	0.348205	1	1	Q55B26_DICDI
biological_process	GO:0000001	mitochondrion inheritance	1	1	1	1	0.303878	1	1	Q54HH1_DICDI
biological_process	GO:0098887	neurotransmitter receptor transport, endosome to postsynaptic membrane	1	1	1	1	0.303878	1	1	Q54Y97_DICDI
biological_process	GO:1905244	regulation of modification of synaptic structure	1	1	1	1	0.303878	1	1	Q54Y97_DICDI
biological_process	GO:0099152	regulation of neurotransmitter receptor transport, endosome to postsynaptic membrane	1	1	1	1	0.303878	1	1	Q54Y97_DICDI
biological_process	GO:0099158	regulation of recycling endosome localization within postsynapse	1	1	1	1	0.303878	1	1	Q54Y97_DICDI
biological_process	GO:0061640	cytoskeleton-dependent cytokinesis	1	1	1	0.952872	0.0709666	1	1	Q54ZI7_DICDI
biological_process	GO:0018126	protein hydroxylation	1	1	1	0.247518	0.944977	1	1	B0G164_DICDI
biological_process	GO:0042789	mRNA transcription by RNA polymerase II	1	1	1	1	0.303878	1	1	Q55A48_DICDI
biological_process	GO:0034728	nucleosome organization	1	1	1	0.991188	0.0217243	1	1	Q55A48_DICDI
biological_process	GO:0031054	pre-miRNA processing	1	1	1	1	0.303878	1	1	Q55FS1_DICDI
biological_process	GO:0032006	regulation of TOR signaling	1	1	1	0.666345	0.490572	1	1	Q55DE8_DICDI
biological_process	GO:0090222	centrosome-templated microtubule nucleation	1	1	1	1	0.303878	1	1	Q54NE5_DICDI
biological_process	GO:0006516	glycoprotein catabolic process	1	2	0.5	0.77914	0.662748	1	1	Q55FC8_DICDI
biological_process	GO:0006474	N-terminal protein amino acid acetylation	1	1	1	0.737174	0.588265	1	1	Q55F07_DICDI
biological_process	GO:0045945	positive regulation of transcription by RNA polymerase III	1	1	1	1	0.303878	1	1	Q54MW3_DICDI
biological_process	GO:0000730	DNA recombinase assembly	1	2	0.5	0.77914	0.662748	1	1	Q54QU4_DICDI
biological_process	GO:0030174	regulation of DNA-dependent DNA replication initiation	1	1	1	1	0.303878	1	1	Q54IM3_DICDI
biological_process	GO:0043647	inositol phosphate metabolic process	1	1	1	0.888907	0.235486	1	1	Q54XR3_DICDI
biological_process	GO:0006430	lysyl-tRNA aminoacylation	1	2	0.5	0.907696	0.515452	1	1	Q54LP4_DICDI
biological_process	GO:1900364	negative regulation of mRNA polyadenylation	1	1	1	1	0.303878	1	1	Q55BM8_DICDI
biological_process	GO:0030953	astral microtubule organization	1	1	1	1	0.303878	1	1	Q553N8_DICDI
biological_process	GO:0035372	protein localization to microtubule	1	1	1	1	0.0923045	1	1	Q553N8_DICDI
biological_process	GO:0072712	response to thiabendazole	1	1	1	1	0.303878	1	1	Q553N8_DICDI
biological_process	GO:0030473	nuclear migration along microtubule	1	1	1	1	0.303878	1	1	Q54D69_DICDI
biological_process	GO:0070898	RNA polymerase III preinitiation complex assembly	1	1	1	1	0.303878	1	1	Q54R53_DICDI
biological_process	GO:0002943	tRNA dihydrouridine synthesis	1	1	1	1	0.303878	1	1	Q54QJ2_DICDI
biological_process	GO:0015969	guanosine tetraphosphate metabolic process	1	2	0.5	0.907696	0.515452	1	1	Q54D33_DICDI
biological_process	GO:1903775	regulation of DNA double-strand break processing	1	1	1	1	0.303878	1	1	Q54R56_DICDI
biological_process	GO:2001173	regulation of histone H2B conserved C-terminal lysine ubiquitination	1	1	1	1	0.303878	1	1	Q54R56_DICDI
biological_process	GO:0042352	GDP-L-fucose salvage	1	1	1	1	0.303878	1	1	Q55DE9_DICDI
biological_process	GO:1990515	3' transitive RNA interference	1	1	1	1	0.303878	1	1	Q54UI6_DICDI
biological_process	GO:1990514	5' transitive RNA interference	1	1	1	1	0.303878	1	1	Q54UI6_DICDI
biological_process	GO:0010587	miRNA catabolic process	1	1	1	1	0.303878	1	1	Q54UI6_DICDI
biological_process	GO:0031998	regulation of fatty acid beta-oxidation	1	1	1	1	0.303878	1	1	Q54XC3_DICDI
biological_process	GO:0034446	substrate adhesion-dependent cell spreading	1	1	1	0.907696	0.515452	1	1	Q75JH9_DICDI
biological_process	GO:0010269	response to selenium ion	1	1	1	1	0.303878	1	1	Q55CQ4_DICDI
biological_process	GO:0019408	dolichol biosynthetic process	1	2	0.5	0.907696	0.515452	1	1	Q55AK1_DICDI
biological_process	GO:0070478	nuclear-transcribed mRNA catabolic process, 3'-5' exonucleolytic nonsense-mediated decay	1	1	1	1	0.303878	1	1	Q86K90_DICDI
biological_process	GO:0048026	positive regulation of mRNA splicing, via spliceosome	1	1	1	1	0.303878	1	1	Q54E37_DICDI
biological_process	GO:0050801	ion homeostasis	1	1	1	0.20565	0.857991	1	1	Q55BP1_DICDI
[truncated: 3,614 more rows]
[truncated: 399 more columns]

## Sheet: polyQ⁄N
GO domain	GO ID	GO term	polyQ⁄N protein	total number	number / total	raw p-value under-representation	raw p-value over-representation	FWER under-representation	FWER over-representation	Gene Name
[truncated: 4,821 more rows]
[truncated: 1,516 more columns]

[truncated: 19 more sheets: polyN, polyY, polyW, polyC, polyP, polyA, polyS, polyT, polyD, polyE, polyG, polyF, polyH, polyI, polyL, polyV, polyM, polyR, polyK]
