# Supplementary material for: Noncanonical usage of stop codons in ciliates expands proteins with Q-rich motifs
Source: bioRxiv preprint, doi:10.1101/2020.12.08.407247, version 3 (2023-11-13)
Supplement: Dataset DS27 [file 407247_file41.xlsx]

## Sheet: SCD
GO domain	GO ID	GO term	SCD protein	total number	number / total	raw p-value under-representation	raw p-value over-representation	FWER under-representation	FWER over-representation	Gene Name
cellular_component	GO:0016021	integral component of membrane	619	6449	0.0959839	7.84363e-39	1	0	1	VAS1_CAEEL	RAC1_CAEEL	TMTC1_CAEEL	MEC2_CAEEL	PGP1_CAEEL	SRG5_CAEEL	PTP4_CAEEL	SRA10_CAEEL	SRA11_CAEEL	SRE29_CAEEL	SRA29_CAEEL	CNG_CAEEL	LRP_CAEEL	KMO_CAEEL	FLD1_CAEEL	EXT2_CAEEL	DAF11_CAEEL	GSLG1_CAEEL	ANC1_CAEEL	GOSR2_CAEEL	MGAT1_CAEEL	CTNS_CAEEL	FUT8_CAEEL	NRA4_CAEEL	OCT1_CAEEL	ERP1B_CAEEL	MUA3_CAEEL	LET4_CAEEL	BRE2_CAEEL	ENPP1_CAEEL	CUT4_CAEEL	GOGA5_CAEEL	FUTA_CAEEL	GADR3_CAEEL	FAT1_CAEEL	MSP1_CAEEL	NLR1_CAEEL	MFRN_CAEEL	PIEZ1_CAEEL	IDA1_CAEEL
cellular_component	GO:0005634	nucleus	469	2719	0.17249	1	2.66394e-07	1	0	PDPK1_CAEEL	PHA4_CAEEL	PLK3_CAEEL	NGN1_CAEEL	SEP1_CAEEL	MSH5_CAEEL	PER_CAEEL	RTF1_CAEEL	SCC3_CAEEL	SEA2_CAEEL	SPT16_CAEEL	TRR1_CAEEL	TNKS1_CAEEL	SEM2_CAEEL	REGE1_CAEEL	SPR3_CAEEL	MET2_CAEEL	RENT1_CAEEL	ELT2_CAEEL	HIRA_CAEEL	MAK1_CAEEL	BUB1_CAEEL	HDA6_CAEEL	BED3_CAEEL	LI15B_CAEEL	LIDB1_CAEEL	FKH3_CAEEL	HM39_CAEEL	FOXO_CAEEL	DDX47_CAEEL	HCF1_CAEEL	FKH4_CAEEL	DAPK_CAEEL	FOZI1_CAEEL	MADD3_CAEEL	HSF1_CAEEL	HLH2_CAEEL	MBK1_CAEEL	NCOR1_CAEEL	HSR9_CAEEL
cellular_component	GO:0005737	cytoplasm	439	2449	0.179257	1	4.5814e-08	1	0	PDPK1_CAEEL	PLK3_CAEEL	SEP1_CAEEL	PER_CAEEL	TMOD_CAEEL	RSA2_CAEEL	SEA2_CAEEL	SRBS1_CAEEL	SH3GH_CAEEL	MET2_CAEEL	RENT1_CAEEL	LGG2_CAEEL	MAK1_CAEEL	IKKE1_CAEEL	KCC2D_CAEEL	KAPC2_CAEEL	FOXO_CAEEL	IFD2_CAEEL	IFA3_CAEEL	EGL10_CAEEL	IPYR_CAEEL	ANC1_CAEEL	MADD3_CAEEL	GLP1_CAEEL	HSF1_CAEEL	HMP1_CAEEL	KAD2_CAEEL	LIN41_CAEEL	LRK1_CAEEL	HLH2_CAEEL	GAP2_CAEEL	CSN2_CAEEL	CDC14_CAEEL	CCNE_CAEEL	CNKR_CAEEL	KLC_CAEEL	KC1G_CAEEL	FOLC_CAEEL	CRTC1_CAEEL	CPB3_CAEEL
molecular_function	GO:0005524	ATP binding	289	1353	0.213599	1	1.54741e-08	1	0	PDPK1_CAEEL	PLK3_CAEEL	MSH5_CAEEL	PGP1_CAEEL	RENT1_CAEEL	MAK1_CAEEL	BUB1_CAEEL	IKKE1_CAEEL	KCC2D_CAEEL	KAPC2_CAEEL	DYHC2_CAEEL	DDX47_CAEEL	DAF11_CAEEL	MOG5_CAEEL	DAPK_CAEEL	DDRB_CAEEL	MADD3_CAEEL	KAD2_CAEEL	KI26L_CAEEL	LRK1_CAEEL	MBK1_CAEEL	CAM1_CAEEL	KRAF1_CAEEL	KC1G_CAEEL	ACS7_CAEEL	FOLC_CAEEL	ENPL1_CAEEL	KIN32_CAEEL	MSP1_CAEEL	ATM_CAEEL	DHX9_CAEEL	DYHC_CAEEL	EGL4_CAEEL	DDRA_CAEEL	HUM6_CAEEL	KS6A1_CAEEL	CGH1_CAEEL	MBK2_CAEEL	MRP7_CAEEL	SCD2_CAEEL
cellular_component	GO:0005886	plasma membrane	242	1355	0.178598	1	5.38905e-07	1	0	RAC1_CAEEL	MEC2_CAEEL	SRBS1_CAEEL	SOL1_CAEEL	DMD_CAEEL	LRP_CAEEL	LGG2_CAEEL	MELT_CAEEL	FLD1_CAEEL	DAF11_CAEEL	DCXR_CAEEL	DDRB_CAEEL	MADD_CAEEL	GLP1_CAEEL	MUA3_CAEEL	CAM1_CAEEL	CPNA5_CAEEL	KC1G_CAEEL	CUT4_CAEEL	EFN4_CAEEL	EFR3_CAEEL	JAC1_CAEEL	NLR1_CAEEL	PIEZ1_CAEEL	LIN10_CAEEL	LMBD2_CAEEL	MRP7_CAEEL	PXL1_CAEEL	SCD2_CAEEL	PIK1_CAEEL	SYG1_CAEEL	STX1A_CAEEL	PTC3_CAEEL	PIKI1_CAEEL	WRT4_CAEEL	VPP1_CAEEL	VINC_CAEEL	TRA2_CAEEL	YT66_CAEEL	UNC13_CAEEL
molecular_function	GO:0046872	metal ion binding	236	1196	0.197324	0.999707	0.000363182	1	0.141	PDE1_CAEEL	PCS1_CAEEL	PDE6_CAEEL	RAPSN_CAEEL	SEA2_CAEEL	SET25_CAEEL	SNF5_CAEEL	REGE1_CAEEL	SPR3_CAEEL	RIM_CAEEL	MAK1_CAEEL	KCC2D_CAEEL	BED3_CAEEL	LI15B_CAEEL	MOE3_CAEEL	FLH3_CAEEL	EXT2_CAEEL	DAF11_CAEEL	DAF25_CAEEL	DAPK_CAEEL	MGAT1_CAEEL	LRK1_CAEEL	FUT8_CAEEL	ERP1B_CAEEL	CAM1_CAEEL	CHE1_CAEEL	EGL43_CAEEL	KRAF1_CAEEL	FOLC_CAEEL	GPA16_CAEEL	FLH2_CAEEL	FUTA_CAEEL	MIG39_CAEEL	LIN36_CAEEL	LIN13_CAEEL	DHX9_CAEEL	EGL4_CAEEL	PLCE1_CAEEL	GLOB9_CAEEL	LIN29_CAEEL
biological_process	GO:0006357	regulation of transcription by RNA polymerase II	136	677	0.200886	0.999979	3.11649e-05	1	0.033	PHA4_CAEEL	NGN1_CAEEL	BED3_CAEEL	FKH3_CAEEL	HM39_CAEEL	FOXO_CAEEL	FKH4_CAEEL	GLP1_CAEEL	HSF1_CAEEL	HLH2_CAEEL	NCOR1_CAEEL	HM21_CAEEL	CHE1_CAEEL	CCNT2_CAEEL	EGL43_CAEEL	MES2_CAEEL	EGL44_CAEEL	HM22_CAEEL	HM23_CAEEL	HM24_CAEEL	HM43_CAEEL	CUT_CAEEL	GRH1_CAEEL	DVE1_CAEEL	MED13_CAEEL	MXL3_CAEEL	MED8_CAEEL	HLH11_CAEEL	LIN29_CAEEL	MED14_CAEEL	LIM4_CAEEL	NFI1_CAEEL	SKN1_CAEEL	SPTF3_CAEEL	VAB3_CAEEL	TBX11_CAEEL	STAT1_CAEEL	VAB15_CAEEL	SEM4_CAEEL	EGL27_CAEEL
cellular_component	GO:0005887	integral component of plasma membrane	125	841	0.148633	0.855127	0.167612	1	1	PLX2_CAEEL	SNF5_CAEEL	DDRB_CAEEL	GBR1_CAEEL	CAM1_CAEEL	LPLT1_CAEEL	DDRA_CAEEL	SYG1_CAEEL	UNC89_CAEEL	SYG2_CAEEL	UN105_CAEEL	UNC58_CAEEL	YS3J_CAEEL	VAB1_CAEEL	LPLT2_CAEEL	ACM3_CAEEL	DEG1_CAEEL	ACM1_CAEEL	ACR5_CAEEL	NPR9_CAEEL	CLHM1_CAEEL	G5EBM0_CAEEL	G5ECM4_CAEEL	G5ECA1_CAEEL	G5EBQ0_CAEEL	G5EF43_CAEEL	G5ECV2_CAEEL	G5EGT4_CAEEL	G5EGI5_CAEEL	O17470_CAEEL	Q19931_CAEEL	Q17645_CAEEL	Q22042_CAEEL	O44661_CAEEL	A0A4V0INF0_CAEEL	O16931_CAEEL	A0A4V0ILV8_CAEEL	Q7JM20_CAEEL	Q9U2E2_CAEEL	O44986_CAEEL
molecular_function	GO:0000981	DNA-binding transcription factor activity, RNA polymerase II-specific	116	402	0.288557	1	2.80999e-09	1	0	PHA4_CAEEL	NGN1_CAEEL	SEM2_CAEEL	ELT2_CAEEL	DAF14_CAEEL	FKH3_CAEEL	HM39_CAEEL	FOXO_CAEEL	FKH4_CAEEL	HLH2_CAEEL	HM21_CAEEL	EGL44_CAEEL	HM22_CAEEL	HM23_CAEEL	HM24_CAEEL	HM43_CAEEL	CUT_CAEEL	ELT1_CAEEL	DVE1_CAEEL	DCP66_CAEEL	HLH11_CAEEL	LIM4_CAEEL	NFI1_CAEEL	SOX2_CAEEL	SKN1_CAEEL	SMA4_CAEEL	SPTF3_CAEEL	VAB3_CAEEL	TBX11_CAEEL	STAT1_CAEEL	VAB15_CAEEL	SEM4_CAEEL	MED29_CAEEL	TBX32_CAEEL	SPTF1_CAEEL	ZAG1_CAEEL	WBS14_CAEEL	UNC4_CAEEL	TBX35_CAEEL	UNC3_CAEEL
cellular_component	GO:0005829	cytosol	111	639	0.173709	0.854317	0.170729	1	1	RAC1_CAEEL	LGG2_CAEEL	MOE3_CAEEL	FOXO_CAEEL	IPYR_CAEEL	DAPK_CAEEL	FOZI1_CAEEL	MADD_CAEEL	GLP1_CAEEL	LARP1_CAEEL	KAD2_CAEEL	FOLC_CAEEL	CRTC1_CAEEL	DVE1_CAEEL	MTHR_CAEEL	EGL4_CAEEL	PTRN1_CAEEL	PXL1_CAEEL	YRGK_CAEEL	PAD1_CAEEL	YNE7_CAEEL	YQ12_CAEEL	RIC1_CAEEL	UBQL_CAEEL	VIP1_CAEEL	VPS54_CAEEL	VPS53_CAEEL	VHP1_CAEEL	QUI1_CAEEL	REP1_CAEEL	NBEA_CAEEL	MIG5_CAEEL	E2AKA_CAEEL	ARL6_CAEEL	CLAS2_CAEEL	GLD1_CAEEL	GLD2_CAEEL	AATC_CAEEL	G5EF06_CAEEL	G5ED99_CAEEL
molecular_function	GO:0008270	zinc ion binding	110	713	0.154278	0.376717	0.662843	1	1	MET2_CAEEL	RENT1_CAEEL	DMD_CAEEL	ELT2_CAEEL	HDA6_CAEEL	LIN41_CAEEL	CEP1_CAEEL	ELT1_CAEEL	CBPC6_CAEEL	NCL1_CAEEL	DRE1_CAEEL	RPB9_CAEEL	RPM1_CAEEL	SMA9_CAEEL	EGL27_CAEEL	UBR1_CAEEL	ZTF11_CAEEL	PSA_CAEEL	ZPR1_CAEEL	RCOR_CAEEL	NAS15_CAEEL	NAS22_CAEEL	NAS27_CAEEL	NAS33_CAEEL	NAS34_CAEEL	NAS37_CAEEL	NAS38_CAEEL	NAS9_CAEEL	HIZR1_CAEEL	NHR23_CAEEL	NHR2_CAEEL	NHR34_CAEEL	NHR41_CAEEL	NHR7_CAEEL	NHR85_CAEEL	NHR8_CAEEL	NH124_CAEEL	GON1_CAEEL	MMPB_CAEEL	GEI17_CAEEL
biological_process	GO:0009792	embryo development ending in birth or egg hatching	109	377	0.289125	1	1.48342e-09	1	0	PLX2_CAEEL	TMOD_CAEEL	TM201_CAEEL	SOS_CAEEL	HMR1_CAEEL	HLH2_CAEEL	LET4_CAEEL	CCNT2_CAEEL	CCNE_CAEEL	HM43_CAEEL	EFN4_CAEEL	DVE1_CAEEL	LPLT1_CAEEL	DRE1_CAEEL	MBK2_CAEEL	IMA2_CAEEL	PPN1_CAEEL	ROCK_CAEEL	SMC1_CAEEL	SZY20_CAEEL	ROL3_CAEEL	RT4I1_CAEEL	TAF1_CAEEL	EGL27_CAEEL	SPK1_CAEEL	SYM2_CAEEL	VPP1_CAEEL	ZYG1_CAEEL	ZYG9_CAEEL	NLK_CAEEL	PSA_CAEEL	ZHP3_CAEEL	VAB1_CAEEL	UNC52_CAEEL	NUP98_CAEEL	RIG6_CAEEL	2AAA_CAEEL	DLG1_CAEEL	ANI1_CAEEL	APR1_CAEEL
molecular_function	GO:0051015	actin filament binding	103	191	0.539267	1	3.99914e-34	1	0	TMOD_CAEEL	TM201_CAEEL	FOZI1_CAEEL	HMP1_CAEEL	CAPZA_CAEEL	NLR1_CAEEL	HUM6_CAEEL	UNC87_CAEEL	SLAP2_CAEEL	UNC53_CAEEL	TTN1_CAEEL	VINC_CAEEL	PLA2_CAEEL	ADD1_CAEEL	ANI1_CAEEL	MYO2_CAEEL	MYO4_CAEEL	KETN1_CAEEL	GELS1_CAEEL	ADD2_CAEEL	G5EG85_CAEEL	G5EGK1_CAEEL	G5EDS2_CAEEL	Q9U9J8_CAEEL	D0VWL6_CAEEL	G5EDD3_CAEEL	O17939_CAEEL	S6F568_CAEEL	G8JYB0_CAEEL	K8ESK9_CAEEL	U4PB58_CAEEL	Q21000_CAEEL	I7LFF2_CAEEL	W6RRZ0_CAEEL	K8FE00_CAEEL	Q9XUT0_CAEEL	G5EFD1_CAEEL	A0A0K3AVI4_CAEEL	S6EZR2_CAEEL	A0A168H5A5_CAEEL
molecular_function	GO:0000978	RNA polymerase II cis-regulatory region sequence-specific DNA binding	101	387	0.260982	1	1.58454e-07	1	0	PHA4_CAEEL	NGN1_CAEEL	SEM2_CAEEL	ELT2_CAEEL	DAF14_CAEEL	FKH3_CAEEL	HM39_CAEEL	FOXO_CAEEL	FKH4_CAEEL	HSF1_CAEEL	HLH2_CAEEL	HM21_CAEEL	CHE1_CAEEL	EGL43_CAEEL	EGL44_CAEEL	HM22_CAEEL	HM23_CAEEL	HM24_CAEEL	HM43_CAEEL	ELT1_CAEEL	GRH1_CAEEL	DVE1_CAEEL	MED8_CAEEL	HLH11_CAEEL	LIN29_CAEEL	NFI1_CAEEL	SOX2_CAEEL	SKN1_CAEEL	SMA4_CAEEL	SPTF3_CAEEL	VAB3_CAEEL	TBX11_CAEEL	STAT1_CAEEL	SEM4_CAEEL	TBX32_CAEEL	SPTF1_CAEEL	ZAG1_CAEEL	WBS14_CAEEL	TBX35_CAEEL	UNC3_CAEEL
molecular_function	GO:0005509	calcium ion binding	89	371	0.239892	0.999983	2.91014e-05	1	0.013	LRP_CAEEL	CUBN_CAEEL	HMR1_CAEEL	MLE_CAEEL	CAPS_CAEEL	GLP1_CAEEL	MUA3_CAEEL	NLR1_CAEEL	UNC13_CAEEL	YT67_CAEEL	UNC52_CAEEL	DIG1_CAEEL	MAN12_CAEEL	EAT20_CAEEL	CELR_CAEEL	CLA1_CAEEL	DEX1_CAEEL	FBLN1_CAEEL	Q9BIF4_CAEEL	Q19019_CAEEL	G5EG33_CAEEL	G5ED46_CAEEL	Q19194_CAEEL	G5EEI5_CAEEL	H2KZC7_CAEEL	G5EEP7_CAEEL	X5M8R9_CAEEL	Q5ZR40_CAEEL	G5EDT4_CAEEL	Q95ZR5_CAEEL	B7WN66_CAEEL	A0A2C9C3F1_CAEEL	A0A1N7SYT5_CAEEL	A0A2C9C3P6_CAEEL	A0A1N7SYW5_CAEEL	A5A8R1_CAEEL	G5EDP5_CAEEL	A0A679L8M9_CAEEL	A0A2C9C3I4_CAEEL	H2L0C3_CAEEL
molecular_function	GO:0004674	protein serine/threonine kinase activity	86	338	0.254438	0.999996	6.97802e-06	1	0.001	PDPK1_CAEEL	PLK3_CAEEL	TRR1_CAEEL	BUB1_CAEEL	IKKE1_CAEEL	DAPK_CAEEL	MADD3_CAEEL	LRK1_CAEEL	MBK1_CAEEL	KRAF1_CAEEL	KC1G_CAEEL	ATM_CAEEL	KS6A1_CAEEL	MBK2_CAEEL	ROCK_CAEEL	SEL5_CAEEL	MOM4_CAEEL	PIK1_CAEEL	SMG1_CAEEL	TAF1_CAEEL	PAR1_CAEEL	SPK1_CAEEL	TTN1_CAEEL	TLK1_CAEEL	TOR_CAEEL	ZYG1_CAEEL	YMX8_CAEEL	NLK_CAEEL	SULU_CAEEL	UNC22_CAEEL	NEKL2_CAEEL	CHK1_CAEEL	KIN20_CAEEL	GCK1_CAEEL	GCK3_CAEEL	ARK1_CAEEL	AKT1_CAEEL	CHK2_CAEEL	G5EFA4_CAEEL	V6CJK3_CAEEL
biological_process	GO:0007165	signal transduction	86	387	0.222222	1	1.98741e-07	1	0.001	PDE1_CAEEL	PDE6_CAEEL	KAPC2_CAEEL	DAF11_CAEEL	GBR1_CAEEL	GAP2_CAEEL	EGL4_CAEEL	MOM4_CAEEL	TG325_CAEEL	UNC53_CAEEL	YO25_CAEEL	ACR5_CAEEL	CED2_CAEEL	HDA4_CAEEL	GCY12_CAEEL	GCY1_CAEEL	GCY20_CAEEL	GCY23_CAEEL	GCY8_CAEEL	G5ECZ1_CAEEL	Q19019_CAEEL	G5EBQ0_CAEEL	Q7JP86_CAEEL	V6CLS7_CAEEL	V6CLR6_CAEEL	A0A4V0INF0_CAEEL	Q95XA9_CAEEL	Q9U2E2_CAEEL	W6SBC4_CAEEL	B5BM35_CAEEL	H2KZX8_CAEEL	A0A4V0IJ32_CAEEL	A0A2K5AU32_CAEEL	X5LPT9_CAEEL	Q9BIC1_CAEEL	Q95ZR5_CAEEL	Q2WF65_CAEEL	U4PBA1_CAEEL	O44452_CAEEL	L8EC34_CAEEL
biological_process	GO:0002119	nematode larval development	84	268	0.313433	1	3.39035e-11	1	0	PLX2_CAEEL	RAC1_CAEEL	TMOD_CAEEL	ELT2_CAEEL	LRP_CAEEL	FOXO_CAEEL	GLP1_CAEEL	HSF1_CAEEL	HLH2_CAEEL	LET4_CAEEL	KRAF1_CAEEL	KLC_CAEEL	FLH2_CAEEL	PTP2_CAEEL	DRE1_CAEEL	NPP5_CAEEL	PTRN1_CAEEL	PXL1_CAEEL	PPN1_CAEEL	MEP1_CAEEL	PEX13_CAEEL	ROCK_CAEEL	SIG7_CAEEL	SMA4_CAEEL	SPTF3_CAEEL	PIKI1_CAEEL	EGL27_CAEEL	VPP1_CAEEL	TOR_CAEEL	ZTF11_CAEEL	SYB1_CAEEL	VHP1_CAEEL	UNC52_CAEEL	APR1_CAEEL	MYRF1_CAEEL	HMX_CAEEL	LE756_CAEEL	MED15_CAEEL	E2AKA_CAEEL	CDK12_CAEEL
cellular_component	GO:0045202	synapse	84	386	0.217617	1	1.10203e-10	1	0	RAPSN_CAEEL	SOL1_CAEEL	RIM_CAEEL	DMD_CAEEL	CYFIP_CAEEL	GBR1_CAEEL	CAPS_CAEEL	MADD_CAEEL	LEV9_CAEEL	EXOC4_CAEEL	CPB3_CAEEL	DYHC_CAEEL	IDA1_CAEEL	LIN10_CAEEL	SYG1_CAEEL	RPM1_CAEEL	STNB_CAEEL	SYG2_CAEEL	VPP1_CAEEL	UNC13_CAEEL	TBH1_CAEEL	RIG6_CAEEL	ACM3_CAEEL	ACR5_CAEEL	AP2M_CAEEL	Q9BIF4_CAEEL	G5EDQ4_CAEEL	G5EBQ0_CAEEL	G5ECV2_CAEEL	G5EDV5_CAEEL	O17470_CAEEL	A0A5E4LYK9_CAEEL	A0A4V0INF0_CAEEL	Q9U2E2_CAEEL	O44986_CAEEL	A0A4V0IJ32_CAEEL	A0A5E4LXW2_CAEEL	O01847_CAEEL	Q2WF65_CAEEL	A0A486WU00_CAEEL
cellular_component	GO:0030424	axon	81	286	0.283217	1	2.83614e-11	1	0	PDPK1_CAEEL	RIM_CAEEL	DDRB_CAEEL	CAPS_CAEEL	GLP1_CAEEL	CAM1_CAEEL	EFN4_CAEEL	ELT1_CAEEL	DDRA_CAEEL	IDA1_CAEEL	PTRN1_CAEEL	SYG1_CAEEL	RPM1_CAEEL	STX1A_CAEEL	UNC80_CAEEL	TDC1_CAEEL	UNC4_CAEEL	ZYX_CAEEL	SYB1_CAEEL	SUMV1_CAEEL	TENSH_CAEEL	VAB1_CAEEL	QUI1_CAEEL	RIG6_CAEEL	EAT20_CAEEL	CELR_CAEEL	CLUA1_CAEEL	CLA1_CAEEL	DCA11_CAEEL	CBPE_CAEEL	AKT1_CAEEL	DYC1_CAEEL	G5EDQ5_CAEEL	Q9BIF4_CAEEL	I1W6S5_CAEEL	Q19128_CAEEL	G5EFQ4_CAEEL	Q7KPP4_CAEEL	G5ED46_CAEEL	O61528_CAEEL
biological_process	GO:0035556	intracellular signal transduction	81	311	0.26045	1	3.62665e-15	1	0	PDPK1_CAEEL	MAK1_CAEEL	EGL10_CAEEL	DAF11_CAEEL	DAPK_CAEEL	KS6A1_CAEEL	PIK1_CAEEL	MTMR5_CAEEL	OSG1_CAEEL	VAV_CAEEL	REI2_CAEEL	PAR1_CAEEL	SPK1_CAEEL	TLK1_CAEEL	UNC13_CAEEL	NLK_CAEEL	SULU_CAEEL	HDA4_CAEEL	MIG5_CAEEL	CHK1_CAEEL	GCY12_CAEEL	GCY1_CAEEL	GCY20_CAEEL	GCY23_CAEEL	GCY8_CAEEL	AKT1_CAEEL	G5EFA4_CAEEL	V6CJK3_CAEEL	G5EFX2_CAEEL	D3KFW7_CAEEL	A5JYS5_CAEEL	A0A4V0ILM7_CAEEL	F5GUD0_CAEEL	V6CKR7_CAEEL	B6GUP8_CAEEL	Q23128_CAEEL	Q19243_CAEEL	A0A061AKZ2_CAEEL	A0A4V0ILE7_CAEEL	X5LXA1_CAEEL
molecular_function	GO:0004712	protein serine/threonine/tyrosine kinase activity	74	253	0.29249	1	2.98487e-07	1	0	PDPK1_CAEEL	PLK3_CAEEL	MAK1_CAEEL	BUB1_CAEEL	IKKE1_CAEEL	KCC2D_CAEEL	KAPC2_CAEEL	DAPK_CAEEL	DDRB_CAEEL	LRK1_CAEEL	MBK1_CAEEL	CAM1_CAEEL	KRAF1_CAEEL	KC1G_CAEEL	ATM_CAEEL	EGL4_CAEEL	KS6A1_CAEEL	MBK2_CAEEL	SCD2_CAEEL	ROCK_CAEEL	SID3_CAEEL	SEL5_CAEEL	SRC2_CAEEL	MOM4_CAEEL	PIK1_CAEEL	SMG1_CAEEL	PAR1_CAEEL	SPK1_CAEEL	TTN1_CAEEL	TLK1_CAEEL	TOR_CAEEL	YX05_CAEEL	ZYG1_CAEEL	YMX8_CAEEL	NLK_CAEEL	SULU_CAEEL	UNC22_CAEEL	YS3J_CAEEL	VAB1_CAEEL	NEKL2_CAEEL
cellular_component	GO:0005856	cytoskeleton	73	199	0.366834	1	1.37181e-34	1	0	RAC1_CAEEL	PTP1_CAEEL	TMOD_CAEEL	DMD_CAEEL	ANC1_CAEEL	DAPK_CAEEL	KIN32_CAEEL	MBK2_CAEEL	ROCK_CAEEL	UNC87_CAEEL	SLAP2_CAEEL	SPE26_CAEEL	YSE2_CAEEL	VINC_CAEEL	SULU_CAEEL	ADD1_CAEEL	ADD2_CAEEL	G5ECZ1_CAEEL	G5EGK1_CAEEL	Q7JP86_CAEEL	G5EDN8_CAEEL	A0A2U9ZY79_CAEEL	Q9XXK4_CAEEL	A0A061AIT4_CAEEL	Q95ZT8_CAEEL	H2KYZ6_CAEEL	H2KZW0_CAEEL	Q18284_CAEEL	G5EFD1_CAEEL	A0A1N7SYP3_CAEEL	I2HA90_CAEEL	G5EFW2_CAEEL	G4S9F5_CAEEL	A0A0K3ATT6_CAEEL	Q9XVH4_CAEEL	G5ECP9_CAEEL	G5ECG8_CAEEL	H2L0C3_CAEEL	Q18471_CAEEL	G5EFD6_CAEEL
cellular_component	GO:0005912	adherens junction	71	106	0.669811	1	1.31045e-34	1	0	SRBS1_CAEEL	HMR1_CAEEL	HMP1_CAEEL	JAC1_CAEEL	PXL1_CAEEL	PAR3_CAEEL	ROCK_CAEEL	PAC1_CAEEL	PTC3_CAEEL	VINC_CAEEL	DLG1_CAEEL	APR1_CAEEL	KIN20_CAEEL	AJM1_CAEEL	Q53U86_CAEEL	G5EEB3_CAEEL	Q53U87_CAEEL	G5EBK3_CAEEL	G5EG33_CAEEL	G5EES2_CAEEL	X5LX73_CAEEL	M1ZJY5_CAEEL	X5LX70_CAEEL	D3DEL8_CAEEL	Q8I103_CAEEL	X5LPT9_CAEEL	H2KYC5_CAEEL	Q9BIC1_CAEEL	X5LV54_CAEEL	A0A2C9C357_CAEEL	H1UBL0_CAEEL	Q4PIU9_CAEEL	Q9BIC0_CAEEL	A0A078BPN7_CAEEL	X5LPU4_CAEEL	G5EFD6_CAEEL	A0A078BS85_CAEEL	G5ECD7_CAEEL	Q21430_CAEEL	X5M5Q5_CAEEL
cellular_component	GO:0016020	membrane	70	492	0.142276	6.37414e-18	1	0	1	SH3GH_CAEEL	CNKR_CAEEL	PIEZ1_CAEEL	LMBD2_CAEEL	MRP7_CAEEL	PKD1_CAEEL	STX1A_CAEEL	PTHB1_CAEEL	PIKI1_CAEEL	LMLN_CAEEL	RIC1_CAEEL	AKAP1_CAEEL	NBEA_CAEEL	LE756_CAEEL	BLI4_CAEEL	CED8_CAEEL	G5EG65_CAEEL	Q7JP86_CAEEL	G5EGI5_CAEEL	G5EGL5_CAEEL	A0A1N7SYR7_CAEEL	A0A5E4LYK9_CAEEL	G5EDD3_CAEEL	Q966P8_CAEEL	O18302_CAEEL	A0A1N7SYN9_CAEEL	A0A5E4LXW2_CAEEL	Q564T0_CAEEL	G5EFC7_CAEEL	O01847_CAEEL	G5EFD1_CAEEL	A0A1N7SYP3_CAEEL	Q8MQ16_CAEEL	Q9N3Y1_CAEEL	Q3S1M2_CAEEL	G5EFW2_CAEEL	Q21746_CAEEL	Q18965_CAEEL	Q7YXC4_CAEEL	G5ECP9_CAEEL
molecular_function	GO:0005085	guanyl-nucleotide exchange factor activity	70	157	0.44586	1	1.3275e-17	1	0	SOS_CAEEL	GBF1_CAEEL	MADD_CAEEL	PLCE1_CAEEL	OSG1_CAEEL	VAV_CAEEL	UNC89_CAEEL	RIC1_CAEEL	GBAS1_CAEEL	K0M7B5_CAEEL	G5ECM5_CAEEL	I1W6S5_CAEEL	G5EC35_CAEEL	G5EEN3_CAEEL	Q7KPP4_CAEEL	O61528_CAEEL	G5EFG8_CAEEL	A0A4V0IN51_CAEEL	Q9U364_CAEEL	B6GUP8_CAEEL	Q7JNG4_CAEEL	Q7JNG6_CAEEL	W6RTN2_CAEEL	S6FMZ4_CAEEL	S6EZU2_CAEEL	A0A4V0ILE7_CAEEL	A0A2C9C2W9_CAEEL	A0A2C9C3B7_CAEEL	O01847_CAEEL	Q18284_CAEEL	A0A2C9C365_CAEEL	O18093_CAEEL	A0A4V0IK11_CAEEL	G5EER5_CAEEL	A0A4V6M3C0_CAEEL	A0A0K3AQN0_CAEEL	C4ALD5_CAEEL	G5EFH7_CAEEL	A0A486WVF0_CAEEL	Q21430_CAEEL
molecular_function	GO:0003677	DNA binding	69	311	0.221865	0.999974	3.58688e-05	1	0.019	RTF1_CAEEL	SCC3_CAEEL	SEA2_CAEEL	SEM2_CAEEL	SPR3_CAEEL	MET2_CAEEL	LI15B_CAEEL	NCOR1_CAEEL	CEP1_CAEEL	DCP66_CAEEL	LIN36_CAEEL	LIN13_CAEEL	SMC1_CAEEL	SSL1_CAEEL	SNPC4_CAEEL	YRGK_CAEEL	TAF1_CAEEL	WRN_CAEEL	YQ23_CAEEL	ZFP1_CAEEL	SWSN7_CAEEL	CEH62_CAEEL	MYRF1_CAEEL	HM19_CAEEL	ARID1_CAEEL	DPOE2_CAEEL	DPOLQ_CAEEL	Q22429_CAEEL	A0A0K3ASV3_CAEEL	G5EEY5_CAEEL	G5EF07_CAEEL	P91094_CAEEL	Q8IG08_CAEEL	A0A2C9C3C4_CAEEL	A0A163VU15_CAEEL	A0A2C9C312_CAEEL	A0A078BPJ6_CAEEL	Q17792_CAEEL	Q565A2_CAEEL	X5M5M2_CAEEL
biological_process	GO:0045944	positive regulation of transcription by RNA polymerase II	67	228	0.29386	1	3.04449e-07	1	0.001	PHA4_CAEEL	NGN1_CAEEL	SPR3_CAEEL	CNG_CAEEL	ELT2_CAEEL	LIDB1_CAEEL	FOXO_CAEEL	GLP1_CAEEL	HSF1_CAEEL	LIN41_CAEEL	HLH2_CAEEL	HSR9_CAEEL	CHE1_CAEEL	EGL43_CAEEL	EGL44_CAEEL	HM22_CAEEL	CRTC1_CAEEL	CEP1_CAEEL	ELT1_CAEEL	DCP66_CAEEL	MXL3_CAEEL	LIN13_CAEEL	DHX9_CAEEL	MEP1_CAEEL	NFI1_CAEEL	SKN1_CAEEL	SPTF3_CAEEL	VAB3_CAEEL	STAT1_CAEEL	YAP1_CAEEL	TBX35_CAEEL	UNC3_CAEEL	CEH28_CAEEL	APR1_CAEEL	HLH6_CAEEL	MYOD1_CAEEL	HMX_CAEEL	NHR23_CAEEL	NHR2_CAEEL	NHR7_CAEEL
molecular_function	GO:0003723	RNA binding	66	420	0.157143	0.518464	0.520378	1	1	RENT1_CAEEL	DDX47_CAEEL	MOG5_CAEEL	LARP1_CAEEL	LIN41_CAEEL	EIF3I_CAEEL	DHX9_CAEEL	NH2L1_CAEEL	ANKHM_CAEEL	MEP1_CAEEL	SIG7_CAEEL	SZY20_CAEEL	YQOA_CAEEL	CWC22_CAEEL	DHX15_CAEEL	SYM2_CAEEL	YQ12_CAEEL	NUP98_CAEEL	AKAP1_CAEEL	DIN1_CAEEL	DHX16_CAEEL	CPSF1_CAEEL	ATX2_CAEEL	CATIN_CAEEL	G5EBQ3_CAEEL	G5ECL3_CAEEL	G5ED26_CAEEL	G5ECB9_CAEEL	Q9XVZ6_CAEEL	W6RTE4_CAEEL	Q9GYS7_CAEEL	A0A2K5ATU5_CAEEL	Q9U203_CAEEL	Q8MXR2_CAEEL	A0A7R9XLP7_CAEEL	Q9GYQ9_CAEEL	W6RRU8_CAEEL	Q20644_CAEEL	Q9U2B5_CAEEL	U4PRA5_CAEEL
cellular_component	GO:0005576	extracellular region	65	417	0.155875	0.897262	0.122823	1	1	LIP1_CAEEL	CUBN_CAEEL	CBD1_CAEEL	ASP17_CAEEL	HRG7_CAEEL	DMON1_CAEEL	DYF4_CAEEL	IRG7_CAEEL	PPN1_CAEEL	VIT2_CAEEL	WRT4_CAEEL	YPP4_CAEEL	U375B_CAEEL	YN81_CAEEL	U375E_CAEEL	VIT6_CAEEL	UNC52_CAEEL	CHIT_CAEEL	DIG1_CAEEL	NAS15_CAEEL	NAS22_CAEEL	NAS27_CAEEL	NAS33_CAEEL	NAS34_CAEEL	NAS37_CAEEL	NAS38_CAEEL	NAS9_CAEEL	GON1_CAEEL	ADT1_CAEEL	ASM1_CAEEL	CL161_CAEEL	DEX1_CAEEL	FBLN1_CAEEL	G5EBM0_CAEEL	G5ECA1_CAEEL	G5EG33_CAEEL	A0A486WY04_CAEEL	Q9XUB6_CAEEL	Q7JL02_CAEEL	A8WI97_CAEEL
cellular_component	GO:0043005	neuron projection	65	320	0.203125	1	5.43783e-14	1	0	RAC1_CAEEL	MEC2_CAEEL	KCC2D_CAEEL	EGL10_CAEEL	CYFIP_CAEEL	IPYR_CAEEL	GBR1_CAEEL	BBS1_CAEEL	CAM1_CAEEL	CPB3_CAEEL	PARG1_CAEEL	LIN10_CAEEL	OSM3_CAEEL	SYB1_CAEEL	SUMV1_CAEEL	VAB1_CAEEL	ACR5_CAEEL	G5EG65_CAEEL	G5EBQ0_CAEEL	G5ED37_CAEEL	G5EBV3_CAEEL	G5EF43_CAEEL	G5ED53_CAEEL	G5EFI1_CAEEL	F5GUD0_CAEEL	A0A4V0INF0_CAEEL	Q9U2E2_CAEEL	A0A4V0IJ32_CAEEL	F5GUA8_CAEEL	Q2WF65_CAEEL	H2FLI7_CAEEL	O44452_CAEEL	C6KRM7_CAEEL	G5EER9_CAEEL	A0A3P6N6F5_CAEEL	F5GUC9_CAEEL	A0A4V6M3Y9_CAEEL	G5EDZ5_CAEEL	A0A3P6MY71_CAEEL	A0A4V0IN81_CAEEL
molecular_function	GO:0106310	protein serine kinase activity	63	183	0.344262	1	4.99765e-10	1	0	PDPK1_CAEEL	PLK3_CAEEL	MAK1_CAEEL	BUB1_CAEEL	IKKE1_CAEEL	KCC2D_CAEEL	KAPC2_CAEEL	DAPK_CAEEL	LRK1_CAEEL	MBK1_CAEEL	KRAF1_CAEEL	KC1G_CAEEL	ATM_CAEEL	EGL4_CAEEL	KS6A1_CAEEL	MBK2_CAEEL	ROCK_CAEEL	SEL5_CAEEL	MOM4_CAEEL	PIK1_CAEEL	SMG1_CAEEL	PAR1_CAEEL	SPK1_CAEEL	TTN1_CAEEL	TLK1_CAEEL	TOR_CAEEL	ZYG1_CAEEL	YMX8_CAEEL	NLK_CAEEL	SULU_CAEEL	UNC22_CAEEL	NEKL2_CAEEL	CHK1_CAEEL	KIN20_CAEEL	E2AKA_CAEEL	CDK12_CAEEL	GCK1_CAEEL	GCK3_CAEEL	ARK1_CAEEL	AKT1_CAEEL
molecular_function	GO:0043565	sequence-specific DNA binding	57	410	0.139024	0.998689	0.00175421	1	0.534	PHA4_CAEEL	FOXO_CAEEL	FLH3_CAEEL	HLH2_CAEEL	CHE1_CAEEL	HM22_CAEEL	CEP1_CAEEL	FLH2_CAEEL	GRH1_CAEEL	LIN29_CAEEL	NFI1_CAEEL	SKN1_CAEEL	SDC3_CAEEL	STAT1_CAEEL	VAB15_CAEEL	EGL27_CAEEL	TBX35_CAEEL	RCOR_CAEEL	MYRF1_CAEEL	MYRF2_CAEEL	NH124_CAEEL	O44638_CAEEL	G5EGS7_CAEEL	G5EDL0_CAEEL	Q19902_CAEEL	Q7JNN6_CAEEL	A0A0K3AUG2_CAEEL	W6SB62_CAEEL	B1GRK4_CAEEL	Q8MNW2_CAEEL	O45987_CAEEL	G5EGQ2_CAEEL	Q3V5L2_CAEEL	H2KZT0_CAEEL	H9G2S6_CAEEL	G5EGG3_CAEEL	G4SCE4_CAEEL	Q3S1J8_CAEEL	Q5TYL4_CAEEL	U4PLN0_CAEEL
molecular_function	GO:0004867	serine-type endopeptidase inhibitor activity	55	127	0.433071	1	1.78542e-13	1	0	PPN1_CAEEL	YN81_CAEEL	G5EEP7_CAEEL	Q5ZR40_CAEEL	G5ED57_CAEEL	Q09983_CAEEL	G5EDT4_CAEEL	H2KMJ9_CAEEL	A0A486WY04_CAEEL	Q9XWX5_CAEEL	B9WRT9_CAEEL	H2KMJ6_CAEEL	Q7JL02_CAEEL	A8WI97_CAEEL	I2HAB0_CAEEL	P90956_CAEEL	A5A8R1_CAEEL	C0Z3L5_CAEEL	O45520_CAEEL	A5HW96_CAEEL	Q5ZR41_CAEEL	G3MU07_CAEEL	H9G334_CAEEL	Q5ZR42_CAEEL	H2KZ68_CAEEL	H2KMJ7_CAEEL	O44131_CAEEL	C1P660_CAEEL	Q19021_CAEEL	G3MU06_CAEEL	Q23456_CAEEL	O62055_CAEEL	O18231_CAEEL	Q5ZR35_CAEEL	O45881_CAEEL	Q9U1T6_CAEEL	H9G336_CAEEL	C1P658_CAEEL	H9G335_CAEEL	L8E811_CAEEL
molecular_function	GO:0003700	DNA-binding transcription factor activity	54	378	0.142857	0.999728	0.000382091	1	0.144	ELT2_CAEEL	LIDB1_CAEEL	FOXO_CAEEL	FLH3_CAEEL	HSF1_CAEEL	EGL43_CAEEL	HM43_CAEEL	CEP1_CAEEL	FLH2_CAEEL	MXL3_CAEEL	LIM4_CAEEL	SKN1_CAEEL	VAB3_CAEEL	VAB15_CAEEL	UNC4_CAEEL	CEH28_CAEEL	HM32_CAEEL	MYOD1_CAEEL	MYRF1_CAEEL	MYRF2_CAEEL	HIZR1_CAEEL	HM18_CAEEL	NDF1_CAEEL	NH124_CAEEL	FKH5_CAEEL	O44638_CAEEL	G5EDU4_CAEEL	G5EGF4_CAEEL	Q9U2Z0_CAEEL	W6SB62_CAEEL	A0A2C9C3C4_CAEEL	B1GRK4_CAEEL	Q8MNW2_CAEEL	O45987_CAEEL	Q3V5L2_CAEEL	Q9U3E2_CAEEL	H2KZT0_CAEEL	V6CLA3_CAEEL	G4SCE4_CAEEL	A0A2C9C3H3_CAEEL
cellular_component	GO:0005739	mitochondrion	53	563	0.0941385	2.63965e-07	1	0.001	1	VDAC_CAEEL	GRPE_CAEEL	FUMH_CAEEL	KAD2_CAEEL	FOLC_CAEEL	COPE_CAEEL	SKN1_CAEEL	MUTA_CAEEL	RM44_CAEEL	RT4I1_CAEEL	THT2_CAEEL	WBS14_CAEEL	AKAP1_CAEEL	GUF1_CAEEL	ABH52_CAEEL	DCA11_CAEEL	G4SRS5_CAEEL	A5JYS5_CAEEL	Q95PY9_CAEEL	A0A2K5ATU5_CAEEL	Q9XWC9_CAEEL	H2L2B2_CAEEL	X5LXA1_CAEEL	G5ED87_CAEEL	Q7JLJ0_CAEEL	Q9N3H3_CAEEL	Q18965_CAEEL	Q9XXI6_CAEEL	O45869_CAEEL	A0A2K5ATU1_CAEEL	H2L2B3_CAEEL	A0A2K5ATV3_CAEEL	A0A486WX00_CAEEL	Q5WRP6_CAEEL	O45106_CAEEL	Q7JM28_CAEEL	Q9XXI5_CAEEL	A0A061ACY6_CAEEL	A0A486WXK7_CAEEL	A0A486WTK6_CAEEL
molecular_function	GO:0004672	protein kinase activity	53	146	0.363014	1	3.83683e-09	1	0	PDPK1_CAEEL	MAK1_CAEEL	BUB1_CAEEL	DAF11_CAEEL	KRAF1_CAEEL	MBK2_CAEEL	MOM4_CAEEL	ROL3_CAEEL	NIPI4_CAEEL	UNC89_CAEEL	SPK1_CAEEL	TLK1_CAEEL	TOR_CAEEL	ZYG1_CAEEL	NLK_CAEEL	E2AKA_CAEEL	GCY12_CAEEL	GCY1_CAEEL	GCY20_CAEEL	GCY23_CAEEL	GCY8_CAEEL	AKT1_CAEEL	A0A061AE24_CAEEL	Q2XN10_CAEEL	H2FLH3_CAEEL	A0A2C9C2W9_CAEEL	A0A2C9C3B7_CAEEL	A0A2C9C2V5_CAEEL	A0A3B1DR12_CAEEL	A0A2C9C2G8_CAEEL	A0A2I2LDW1_CAEEL	A0A0K3AVW5_CAEEL	G3MTX3_CAEEL	A0A0K3AUK6_CAEEL	A0A3B1E657_CAEEL	A0A0K3ASB9_CAEEL	A0A2I2LDX0_CAEEL	A0A2C9C2V3_CAEEL	A0A061ACT3_CAEEL	H2FLH2_CAEEL
biological_process	GO:0030154	cell differentiation	53	248	0.21371	1	7.03537e-18	1	0	PHA4_CAEEL	PER_CAEEL	SEA2_CAEEL	TRR1_CAEEL	SEM2_CAEEL	SDC2_CAEEL	DAF14_CAEEL	LI15B_CAEEL	FKH3_CAEEL	FKH4_CAEEL	HM22_CAEEL	HM24_CAEEL	KIN32_CAEEL	PAR3_CAEEL	SID3_CAEEL	SOX2_CAEEL	SRC2_CAEEL	SMA4_CAEEL	ROL3_CAEEL	STX1A_CAEEL	NIPI4_CAEEL	CWC22_CAEEL	TRA2_CAEEL	UN105_CAEEL	CEH28_CAEEL	MYRF1_CAEEL	MYRF2_CAEEL	NHR2_CAEEL	NHR34_CAEEL	NHR41_CAEEL	NHR7_CAEEL	NHR85_CAEEL	NHR8_CAEEL	LE756_CAEEL	LI15A_CAEEL	HLH34_CAEEL	GCK3_CAEEL	ARK1_CAEEL	FOX1_CAEEL	G5EGE2_CAEEL
cellular_component	GO:0005615	extracellular space	53	330	0.160606	0.853609	0.184588	1	1	LEV9_CAEEL	WRT4_CAEEL	YMS5_CAEEL	TBH1_CAEEL	LE756_CAEEL	MMPB_CAEEL	ASM1_CAEEL	CO4A1_CAEEL	CBPE_CAEEL	G5EDQ4_CAEEL	G5EDV5_CAEEL	G5ED46_CAEEL	H9G2Z9_CAEEL	Q93204_CAEEL	H9G2Z8_CAEEL	G5EEP7_CAEEL	Q5ZR40_CAEEL	G5ED57_CAEEL	G5EDT4_CAEEL	B9WRT9_CAEEL	I2HAB0_CAEEL	Q93746_CAEEL	A5A8R1_CAEEL	G5EGA4_CAEEL	O45520_CAEEL	Q5ZR41_CAEEL	H9G334_CAEEL	Q5ZR42_CAEEL	Q9N4X3_CAEEL	Q8T3E1_CAEEL	H2KZ68_CAEEL	O44131_CAEEL	C1P660_CAEEL	P90848_CAEEL	G5EF89_CAEEL	Q5ZR35_CAEEL	Q8MQ79_CAEEL	Q9NAQ4_CAEEL	O45881_CAEEL	H9G336_CAEEL
biological_process	GO:0007268	chemical synaptic transmission	51	245	0.208163	0.999623	0.000580474	1	0.416	RAPSN_CAEEL	GBR1_CAEEL	MADD_CAEEL	EXOC4_CAEEL	LIN10_CAEEL	STX1A_CAEEL	ACM3_CAEEL	ACM1_CAEEL	ACR5_CAEEL	Q9BIF4_CAEEL	G5EBQ0_CAEEL	G5ECV2_CAEEL	O17470_CAEEL	A0A4V0INF0_CAEEL	Q9U2E2_CAEEL	O44986_CAEEL	A0A4V0IJ32_CAEEL	Q2WF65_CAEEL	A0A486WU00_CAEEL	O44452_CAEEL	A0A3P6N6F5_CAEEL	A0A4V6M3Y9_CAEEL	A0A3P6MY71_CAEEL	A0A4V0IN81_CAEEL	A0A1C3NSJ3_CAEEL	Q8MPP4_CAEEL	O45732_CAEEL	V6CLV8_CAEEL	A0A0M7RFG1_CAEEL	O45601_CAEEL	A0A4V0IKP2_CAEEL	Q95Q96_CAEEL	A0A4V0IK93_CAEEL	V6CLR8_CAEEL	G5EDN9_CAEEL	G5ECN1_CAEEL	A0A1C3NSI0_CAEEL	A0A4V0ILI0_CAEEL	A0A1C3NSH2_CAEEL	A0A4V0IKM8_CAEEL
biological_process	GO:0008340	determination of adult lifespan	49	285	0.17193	0.658609	0.401181	1	1	PHA4_CAEEL	PDE1_CAEEL	SEA2_CAEEL	DAF14_CAEEL	FOXO_CAEEL	HCF1_CAEEL	DAF11_CAEEL	HSF1_CAEEL	HLH2_CAEEL	OCT1_CAEEL	HM23_CAEEL	CRTC1_CAEEL	CEP1_CAEEL	EGL4_CAEEL	RLE1_CAEEL	CGH1_CAEEL	NFI1_CAEEL	SIR2_CAEEL	SKN1_CAEEL	SMA4_CAEEL	SMA9_CAEEL	NPHP1_CAEEL	WRN_CAEEL	UBE4_CAEEL	WBS14_CAEEL	TOR_CAEEL	VHP1_CAEEL	MDL1_CAEEL	MED15_CAEEL	MMPB_CAEEL	CNNM5_CAEEL	CLH_CAEEL	DCA11_CAEEL	AKT1_CAEEL	ADR1_CAEEL	G5EDP9_CAEEL	G5EDU4_CAEEL	G5EF88_CAEEL	Q93194_CAEEL	G5EEL1_CAEEL
biological_process	GO:0016477	cell migration	49	90	0.544444	1	1.15547e-12	1	0	RAC1_CAEEL	SOS_CAEEL	HMR1_CAEEL	LAM2_CAEEL	CYFIP_CAEEL	FOZI1_CAEEL	HMP1_CAEEL	KI26L_CAEEL	CAM1_CAEEL	EPI1_CAEEL	PIKI1_CAEEL	UNC52_CAEEL	APR1_CAEEL	CED2_CAEEL	MIG5_CAEEL	GON1_CAEEL	G5EBV3_CAEEL	G5EEV6_CAEEL	G5EEN3_CAEEL	Q7KPP4_CAEEL	O61528_CAEEL	G5EEI5_CAEEL	Q95XA9_CAEEL	Q7JNG4_CAEEL	H9G348_CAEEL	Q7JNG6_CAEEL	H1ZUX0_CAEEL	H9G351_CAEEL	C1P640_CAEEL	C1P641_CAEEL	H9G354_CAEEL	Q19739_CAEEL	G5ECV3_CAEEL	C4ALD5_CAEEL	H9G352_CAEEL	H2KYM2_CAEEL	S6EZQ4_CAEEL	H1ZUX1_CAEEL	H2KYM4_CAEEL	H2L2A7_CAEEL
biological_process	GO:0015031	protein transport	47	170	0.276471	0.999998	2.74408e-06	1	0.001	CUBN_CAEEL	GOSR2_CAEEL	CAPS_CAEEL	BBS1_CAEEL	EXOC4_CAEEL	DYF2_CAEEL	COPE_CAEEL	CNT2_CAEEL	MON2_CAEEL	PTHB1_CAEEL	EXOC5_CAEEL	PAD1_CAEEL	VPS54_CAEEL	NUP98_CAEEL	APR1_CAEEL	GON1_CAEEL	G5EED5_CAEEL	Q20913_CAEEL	Q9XXI0_CAEEL	A0A061ACJ2_CAEEL	A0A4V0IKA6_CAEEL	O17981_CAEEL	Q17687_CAEEL	A0A061ACM4_CAEEL	Q95ZV3_CAEEL	G5EFH7_CAEEL	A0A061AKQ5_CAEEL	A0A061AJ06_CAEEL	Q19833_CAEEL	H9G2V2_CAEEL	X5M914_CAEEL	A0A061ADU4_CAEEL	A0A061AKP8_CAEEL	H9G2V3_CAEEL	A0A061ACJ8_CAEEL	Q9TXI3_CAEEL	A0A4V0IM30_CAEEL	A0A061ACM9_CAEEL	Q2PJ77_CAEEL	X5M5X6_CAEEL
molecular_function	GO:0016887	ATP hydrolysis activity	46	229	0.200873	1	3.01162e-07	1	0	DDX47_CAEEL	MOG5_CAEEL	KI26L_CAEEL	ENPL1_CAEEL	MSP1_CAEEL	DHX9_CAEEL	CGH1_CAEEL	SMC3_CAEEL	SMC1_CAEEL	SSL1_CAEEL	OSM3_CAEEL	SMC6_CAEEL	DHX15_CAEEL	WRN_CAEEL	DHX16_CAEEL	G5ED99_CAEEL	G5EC43_CAEEL	G5EG83_CAEEL	G5EFQ4_CAEEL	G5EBX0_CAEEL	G5ECC0_CAEEL	Q9XVZ6_CAEEL	G5ED98_CAEEL	G8JY03_CAEEL	V6CL80_CAEEL	Q8MQ20_CAEEL	Q9XXI9_CAEEL	L8E6W9_CAEEL	Q8MQ04_CAEEL	Q8MQ03_CAEEL	A0A486WUN2_CAEEL	Q9XVR7_CAEEL	Q23673_CAEEL	G5EFG5_CAEEL	O62217_CAEEL	Q65XY4_CAEEL	Q8MYM8_CAEEL	V6CLB1_CAEEL	G5EFJ0_CAEEL	G5EGS3_CAEEL
biological_process	GO:0045087	innate immune response	44	297	0.148148	0.188401	0.851813	1	1	PGP1_CAEEL	ELT2_CAEEL	FOXO_CAEEL	IPYR_CAEEL	DAPK_CAEEL	HSF1_CAEEL	KIN32_CAEEL	IRG7_CAEEL	SID3_CAEEL	SRC2_CAEEL	ROL3_CAEEL	NIPI4_CAEEL	YM9I_CAEEL	RT4I1_CAEEL	ARK1_CAEEL	AKT1_CAEEL	G5EBV3_CAEEL	Q27GU4_CAEEL	Q8I4L6_CAEEL	O62092_CAEEL	O45195_CAEEL	A0A2K5ATV5_CAEEL	O62091_CAEEL	Q2EEM6_CAEEL	Q9TXW6_CAEEL	Q9U3B5_CAEEL	Q9XUF6_CAEEL	Q22243_CAEEL	Q93198_CAEEL	Q9N5Y7_CAEEL	Q21330_CAEEL	Q17922_CAEEL	Q9XUD6_CAEEL	O62153_CAEEL	G5EFJ3_CAEEL	P90732_CAEEL	Q9XUD5_CAEEL	H2L0Q1_CAEEL	Q19576_CAEEL	A0A2K5ATT5_CAEEL
biological_process	GO:0007015	actin filament organization	43	78	0.551282	1	8.30801e-19	1	0	RAC1_CAEEL	TMOD_CAEEL	HUM6_CAEEL	SLAP2_CAEEL	G5EBV3_CAEEL	G5EDS2_CAEEL	G5EBK3_CAEEL	G5EES2_CAEEL	O17939_CAEEL	S6F568_CAEEL	Q8I103_CAEEL	K8ESK9_CAEEL	W6RRZ0_CAEEL	K8FE00_CAEEL	S6EZR2_CAEEL	A0A168H5A5_CAEEL	H1UBL0_CAEEL	D0IMZ6_CAEEL	A0A168H5E2_CAEEL	D0IMZ5_CAEEL	K8F7Z0_CAEEL	W6RY57_CAEEL	Q95ZU1_CAEEL	D0IMZ8_CAEEL	Q20456_CAEEL	Q8I7K3_CAEEL	D0IMZ7_CAEEL	D3YT13_CAEEL	Q56VX4_CAEEL	H1UBK9_CAEEL	A0A168H5H9_CAEEL	G5EE23_CAEEL	B6VQ62_CAEEL	S6FD20_CAEEL	H2KYW1_CAEEL	G8JY81_CAEEL	A0A163UTE6_CAEEL	A0A168H541_CAEEL	Q9TZI9_CAEEL	D3YT14_CAEEL
biological_process	GO:0040017	positive regulation of locomotion	42	98	0.428571	1	1.74486e-09	1	0	DMD_CAEEL	LIPB_CAEEL	LRP_CAEEL	LAM2_CAEEL	EGL10_CAEEL	FAT1_CAEEL	EPI1_CAEEL	PAT2_CAEEL	STNB_CAEEL	VAV_CAEEL	UNC89_CAEEL	UNC80_CAEEL	UNC22_CAEEL	UNC52_CAEEL	MMPB_CAEEL	FBLN1_CAEEL	DYC1_CAEEL	G5EG53_CAEEL	G5EEV6_CAEEL	G5ECE3_CAEEL	F5GUD0_CAEEL	G5EEI5_CAEEL	H9G348_CAEEL	H9G351_CAEEL	Q9U3A6_CAEEL	C1P640_CAEEL	C1P641_CAEEL	H9G354_CAEEL	F5GUC9_CAEEL	A0A061AJI9_CAEEL	G5ECI9_CAEEL	H9G352_CAEEL	Q8I4H0_CAEEL	Q8I4G9_CAEEL	H9G353_CAEEL	H9G349_CAEEL	H9G350_CAEEL	A0A061AD21_CAEEL	Q21875_CAEEL	A0A1T5HUZ1_CAEEL
molecular_function	GO:0030246	carbohydrate binding	42	340	0.123529	0.00766333	0.995069	0.719	1	LPLT1_CAEEL	IRG7_CAEEL	YPX5_CAEEL	LPLT2_CAEEL	CL161_CAEEL	G5ED09_CAEEL	O01336_CAEEL	G5EDN7_CAEEL	H2KZL0_CAEEL	A0A2C9C3D7_CAEEL	Q9U2Q3_CAEEL	Q19231_CAEEL	Q9N3W1_CAEEL	Q9XUH9_CAEEL	Q9N3V9_CAEEL	O76586_CAEEL	Q18574_CAEEL	O16642_CAEEL	Q18373_CAEEL	A4F310_CAEEL	Q5WRN9_CAEEL	O45821_CAEEL	Q95XX2_CAEEL	Q9XUI0_CAEEL	Q7JK99_CAEEL	Q95QR9_CAEEL	M1ZJ53_CAEEL	A0A061AD52_CAEEL	G5EFM5_CAEEL	P90732_CAEEL	Q22932_CAEEL	Q20829_CAEEL	O17705_CAEEL	Q9XUI4_CAEEL	O16778_CAEEL	H2KZL1_CAEEL	A4F318_CAEEL	Q9N3W9_CAEEL	Q9XUI6_CAEEL	O45275_CAEEL
cellular_component	GO:0043025	neuronal cell body	41	215	0.190698	0.999427	0.000974373	1	0.258	PDPK1_CAEEL	RAC1_CAEEL	DAF11_CAEEL	CAPS_CAEEL	LRK1_CAEEL	EFN4_CAEEL	LIN10_CAEEL	PKD1_CAEEL	OSM3_CAEEL	STX1A_CAEEL	TDC1_CAEEL	QUI1_CAEEL	RIG6_CAEEL	MACO1_CAEEL	CLUA1_CAEEL	GCY35_CAEEL	DCA11_CAEEL	CBPE_CAEEL	AKT1_CAEEL	G5EDQ5_CAEEL	G5EF43_CAEEL	G5EFQ4_CAEEL	G5ECC0_CAEEL	G5ED46_CAEEL	G5ED53_CAEEL	O61827_CAEEL	G5EFI1_CAEEL	G5ED98_CAEEL	Q8MQ20_CAEEL	G5EER9_CAEEL	Q9N4C1_CAEEL	A7LPF8_CAEEL	Q9U377_CAEEL	H9G2V2_CAEEL	G5EEZ9_CAEEL	G5EDG3_CAEEL	H9G2V3_CAEEL	G5EFE1_CAEEL	Q21875_CAEEL	Q20888_CAEEL
biological_process	GO:0040011	locomotion	40	132	0.30303	1	2.65534e-15	1	0	TMOD_CAEEL	RIM_CAEEL	LIDB1_CAEEL	KI26L_CAEEL	KLC_CAEEL	PICAL_CAEEL	RPM1_CAEEL	ROL3_CAEEL	STX1A_CAEEL	VPP1_CAEEL	UNC4_CAEEL	UNC58_CAEEL	UNC52_CAEEL	ANI1_CAEEL	MYO4_CAEEL	MYSP_CAEEL	MACO1_CAEEL	MED15_CAEEL	G5EBM0_CAEEL	G5EGD8_CAEEL	G5ECA1_CAEEL	G5EG65_CAEEL	G5EDU4_CAEEL	G5EE70_CAEEL	G5EEI5_CAEEL	H9G348_CAEEL	O17939_CAEEL	B7WN66_CAEEL	Q9U3E2_CAEEL	H9G351_CAEEL	H9G354_CAEEL	Q94279_CAEEL	H9G352_CAEEL	Q22667_CAEEL	Q17490_CAEEL	H9G353_CAEEL	H9G349_CAEEL	H9G350_CAEEL	I2HAA7_CAEEL	I2HAA6_CAEEL
biological_process	GO:0006355	regulation of transcription, DNA-templated	40	147	0.272109	0.999997	4.16413e-06	1	0.002	SEM2_CAEEL	HIRA_CAEEL	FOXO_CAEEL	HCF1_CAEEL	EGL43_CAEEL	EGL44_CAEEL	CEP1_CAEEL	NPP5_CAEEL	LIM4_CAEEL	SOX2_CAEEL	VAB3_CAEEL	UNC4_CAEEL	ZTF11_CAEEL	SWSN7_CAEEL	DIN1_CAEEL	HM32_CAEEL	CTR9_CAEEL	FKH5_CAEEL	G5EDU4_CAEEL	A0A0K3AUG2_CAEEL	A0A4V6M3C5_CAEEL	H2KMJ3_CAEEL	Q18605_CAEEL	H2KZX2_CAEEL	Q9BLA0_CAEEL	A0A1N7SZG1_CAEEL	A0A0S4XR43_CAEEL	A0A4V0IK80_CAEEL	Q9N3C6_CAEEL	A0A2C9C364_CAEEL	G5EFX8_CAEEL	A0A2K5ATP7_CAEEL	Q17922_CAEEL	A4LBC3_CAEEL	A0A0K3ATV0_CAEEL	Q21216_CAEEL	A0A0K3AQW8_CAEEL	A5JYS9_CAEEL	Q8MQ17_CAEEL	A4LBC2_CAEEL
biological_process	GO:0018105	peptidyl-serine phosphorylation	39	167	0.233533	0.992558	0.0123731	1	1	PDPK1_CAEEL	MAK1_CAEEL	IKKE1_CAEEL	KCC2D_CAEEL	KAPC2_CAEEL	MBK1_CAEEL	KC1G_CAEEL	EGL4_CAEEL	KS6A1_CAEEL	MBK2_CAEEL	PAR1_CAEEL	TLK1_CAEEL	ZYG1_CAEEL	YMX8_CAEEL	NLK_CAEEL	UNC22_CAEEL	KIN20_CAEEL	E2AKA_CAEEL	GCK3_CAEEL	AKT1_CAEEL	G5EFA4_CAEEL	G5EFX2_CAEEL	D3KFW7_CAEEL	A0A4V0ILM7_CAEEL	A0A061AKZ2_CAEEL	Q17448_CAEEL	Q8MPS7_CAEEL	H9G330_CAEEL	A0A4V0IL76_CAEEL	H9G331_CAEEL	G5EG63_CAEEL	A0A3P6NNZ8_CAEEL	H9G329_CAEEL	Q23566_CAEEL	A0A3P6MYF5_CAEEL	Q9U2J3_CAEEL	H9G328_CAEEL	G5EGE3_CAEEL	G5EBW1_CAEEL
cellular_component	GO:0055120	striated muscle dense body	39	153	0.254902	0.99993	0.000152604	1	0.037	DMD_CAEEL	PXL1_CAEEL	PAT2_CAEEL	MOM4_CAEEL	VINC_CAEEL	ZYX_CAEEL	UNC95_CAEEL	TENSH_CAEEL	ZPR1_CAEEL	UNC52_CAEEL	CPNA1_CAEEL	GELS1_CAEEL	DCA11_CAEEL	DYC1_CAEEL	G5EGK1_CAEEL	G5EFX2_CAEEL	O61980_CAEEL	B6GUP8_CAEEL	G4S9F5_CAEEL	G5EER5_CAEEL	H2L0C3_CAEEL	Q86D12_CAEEL	G5EEL1_CAEEL	Q9XXM9_CAEEL	Q9XUS4_CAEEL	Q9XUS6_CAEEL	G5EFG1_CAEEL	G5EF62_CAEEL	Q9XUS5_CAEEL	G5EFL5_CAEEL	G5EC72_CAEEL	Q95XN3_CAEEL	G4SI07_CAEEL	Q17636_CAEEL	Q8WQE5_CAEEL	G5EEF6_CAEEL	Q69Z13_CAEEL	G5EGE3_CAEEL	Q1XFY3_CAEEL
molecular_function	GO:0005516	calmodulin binding	39	103	0.378641	1	5.44407e-08	1	0	PDE1_CAEEL	SOS_CAEEL	MAK1_CAEEL	KCC2D_CAEEL	HSF1_CAEEL	PTRN1_CAEEL	UNC53_CAEEL	UNC13_CAEEL	UNC22_CAEEL	HDA4_CAEEL	AKT1_CAEEL	G5ED53_CAEEL	U4PS34_CAEEL	G5EFI1_CAEEL	B5BM35_CAEEL	F5GUA8_CAEEL	U4PF78_CAEEL	G5EER9_CAEEL	O17666_CAEEL	G5EDZ5_CAEEL	U4PCE2_CAEEL	Q20456_CAEEL	U4PMS5_CAEEL	Q21295_CAEEL	D3YT13_CAEEL	U4PC02_CAEEL	G5EEZ9_CAEEL	F5GUA9_CAEEL	G5EDG3_CAEEL	H2L0I6_CAEEL	B6VQ62_CAEEL	U4PCD4_CAEEL	D3YT14_CAEEL	U4PC07_CAEEL	E7EM33_CAEEL	U4PF86_CAEEL	C6KRJ0_CAEEL	Q8I4D2_CAEEL	H2L0I5_CAEEL
biological_process	GO:0030036	actin cytoskeleton organization	39	91	0.428571	1	1.52125e-31	1	0	CAPZA_CAEEL	OSG1_CAEEL	UNC53_CAEEL	G5EG85_CAEEL	G5EDN8_CAEEL	Q9U9J8_CAEEL	D0VWL6_CAEEL	U4PB58_CAEEL	A0A0K3AVI4_CAEEL	U4PBJ9_CAEEL	U4PRA0_CAEEL	A0A0K3AT80_CAEEL	A0A4V0INA2_CAEEL	S6FN00_CAEEL	U4PB53_CAEEL	U4PEE8_CAEEL	U4PM01_CAEEL	A0A0K3AW96_CAEEL	U4PEE3_CAEEL	U4PBK4_CAEEL	E0AHA7_CAEEL	U4PR92_CAEEL	G5EEL1_CAEEL	A0A4V0IN32_CAEEL	G5EEU6_CAEEL	A0A4V0IK09_CAEEL	U4PM09_CAEEL	C8JQR2_CAEEL	G5EFG1_CAEEL	G5EBX1_CAEEL	U4PR97_CAEEL	G5EFL5_CAEEL	G5EC72_CAEEL	G5EEF6_CAEEL	A0A0K3ASN4_CAEEL	U4PM04_CAEEL	A0A0K3AYI1_CAEEL	D0VWL7_CAEEL	U4PEF1_CAEEL
cellular_component	GO:0005874	microtubule	38	119	0.319328	1	2.13166e-07	1	0	DYHC2_CAEEL	KI26L_CAEEL	KLC_CAEEL	EXC6_CAEEL	NUF2_CAEEL	OSM3_CAEEL	ATAT1_CAEEL	ANI1_CAEEL	G5EC43_CAEEL	G5EG83_CAEEL	O61208_CAEEL	G5EFQ4_CAEEL	G5EC35_CAEEL	G5EBX0_CAEEL	G5ECC0_CAEEL	A0A1N7SYR7_CAEEL	G5EDD3_CAEEL	Q8ITY3_CAEEL	A0A1N7SYN9_CAEEL	V6CL80_CAEEL	W6RR23_CAEEL	Q8MQ20_CAEEL	Q8MQ04_CAEEL	Q18965_CAEEL	A0A163VTS9_CAEEL	A0A486WVF0_CAEEL	A0A486WUT8_CAEEL	Q8MQ03_CAEEL	A0A486WUN2_CAEEL	G5EFW3_CAEEL	G5EG97_CAEEL	V6CLB1_CAEEL	G5EFJ0_CAEEL	G5EGS3_CAEEL	Q20888_CAEEL	P91400_CAEEL	Q17711_CAEEL	G5EBH3_CAEEL
cellular_component	GO:0005783	endoplasmic reticulum	37	301	0.122924	0.885058	0.137212	1	1	TMTC1_CAEEL	MTP_CAEEL	GNA1_CAEEL	NRA4_CAEEL	ENPL1_CAEEL	SKN1_CAEEL	ZDHCS_CAEEL	ZPR1_CAEEL	MYRF1_CAEEL	MAN12_CAEEL	GON1_CAEEL	G5EF26_CAEEL	G4RT15_CAEEL	Q2EEM5_CAEEL	O61825_CAEEL	Q8IG33_CAEEL	Q86D12_CAEEL	Q9N3E0_CAEEL	Q9U2K0_CAEEL	Q9XXT5_CAEEL	Q9XUS4_CAEEL	Q9XUS6_CAEEL	E9P8A0_CAEEL	O61766_CAEEL	Q9NF22_CAEEL	H2L041_CAEEL	A8WFH5_CAEEL	Q2EEN1_CAEEL	Q9XUE3_CAEEL	Q9XUS5_CAEEL	Q17636_CAEEL	G5EGG0_CAEEL	Q8WQE5_CAEEL	Q9N4L6_CAEEL	Q69Z13_CAEEL	O76413_CAEEL	Q9U1V9_CAEEL
molecular_function	GO:0000977	RNA polymerase II transcription regulatory region sequence-specific DNA binding	37	124	0.298387	1	8.4584e-08	1	0	ELT2_CAEEL	BED3_CAEEL	FKH3_CAEEL	FOXO_CAEEL	HLH2_CAEEL	CHE1_CAEEL	CUT_CAEEL	MXL3_CAEEL	LIN29_CAEEL	LIM4_CAEEL	NFI1_CAEEL	SOX2_CAEEL	SKN1_CAEEL	VAB15_CAEEL	SEM4_CAEEL	MED29_CAEEL	UNC4_CAEEL	UNC3_CAEEL	HM31_CAEEL	HLH6_CAEEL	MYOD1_CAEEL	HMX_CAEEL	NHR23_CAEEL	HLH34_CAEEL	HLH10_CAEEL	APTF1_CAEEL	FKH5_CAEEL	G5EFL9_CAEEL	G5EGN3_CAEEL	G5EDL0_CAEEL	Q21836_CAEEL	Q9U2Z0_CAEEL	G5EBG6_CAEEL	Q20435_CAEEL	B7WN96_CAEEL	Q18289_CAEEL	Q7JNM3_CAEEL
molecular_function	GO:0004888	transmembrane signaling receptor activity	36	249	0.144578	3.74114e-05	0.999975	0.005	1	SRG5_CAEEL	SRA11_CAEEL	GLP1_CAEEL	GABR2_CAEEL	LPLT1_CAEEL	PAT2_CAEEL	SRG3_CAEEL	TRA2_CAEEL	ACR5_CAEEL	GABR1_CAEEL	A0A4V0INF0_CAEEL	Q9U2E2_CAEEL	A0A4V0IJ32_CAEEL	I2HA93_CAEEL	Q2WF65_CAEEL	O44452_CAEEL	O44497_CAEEL	A0A3P6N6F5_CAEEL	A0A4V6M3Y9_CAEEL	A0A3P6MY71_CAEEL	A0A4V0IN81_CAEEL	Q8MPP4_CAEEL	A0A0M7RFG1_CAEEL	A0A4V0IKP2_CAEEL	Q95Q96_CAEEL	A0A4V0IK93_CAEEL	G5ECN1_CAEEL	A0A4V0ILI0_CAEEL	A0A4V0IKM8_CAEEL	A0A4V0IK64_CAEEL	A0A4V0ILX4_CAEEL	G5ED92_CAEEL	A0A3P6NP92_CAEEL	A0A4V0IKB1_CAEEL	H2KYL4_CAEEL	A0A3P6P985_CAEEL
molecular_function	GO:0008017	microtubule binding	36	109	0.330275	0.999999	1.91375e-06	1	0	LGG2_CAEEL	KI26L_CAEEL	OSM3_CAEEL	ZYG9_CAEEL	ANI1_CAEEL	APR1_CAEEL	MACO1_CAEEL	CLAP3_CAEEL	CLAS2_CAEEL	G5EC43_CAEEL	G5EG83_CAEEL	G5EFQ4_CAEEL	G5EBX0_CAEEL	G5ECC0_CAEEL	A0A1N7SYR7_CAEEL	A0A2U9ZY79_CAEEL	G5EDD3_CAEEL	Q23542_CAEEL	A0A1N7SYN9_CAEEL	V6CL80_CAEEL	A0A1N7SYP3_CAEEL	Q8MQ20_CAEEL	Q8MQ04_CAEEL	Q18965_CAEEL	E2JKY8_CAEEL	G5EFE3_CAEEL	A0A1N7SYN7_CAEEL	Q8MQ03_CAEEL	A0A486WUN2_CAEEL	E2JKZ0_CAEEL	V6CLB1_CAEEL	G5EFE1_CAEEL	G5EFJ0_CAEEL	G5EGS3_CAEEL	Q20888_CAEEL	P91400_CAEEL
molecular_function	GO:0005096	GTPase activator activity	36	156	0.230769	1	2.08421e-15	1	0	TBC11_CAEEL	GAP2_CAEEL	CNT2_CAEEL	PAC1_CAEEL	YQP4_CAEEL	REP1_CAEEL	EAT17_CAEEL	ELMD3_CAEEL	Q9U2D8_CAEEL	P90904_CAEEL	G5EBE2_CAEEL	A0A1X7RBL1_CAEEL	G5EBY2_CAEEL	H2KZX8_CAEEL	A0A2K5AU32_CAEEL	Q94222_CAEEL	A0A0K3AU43_CAEEL	K8F7X2_CAEEL	A0A2K5AU29_CAEEL	A0A1X7RC73_CAEEL	G5EE94_CAEEL	C5NU64_CAEEL	O18181_CAEEL	A0A061ACS9_CAEEL	A0A2K5AU28_CAEEL	A0A0K3ATN9_CAEEL	K8ESB8_CAEEL	A0A1X7RBL4_CAEEL	G4SNJ8_CAEEL	A0A2K5AU23_CAEEL	Q7K711_CAEEL	H1UBJ3_CAEEL	Q20436_CAEEL	K8ESI6_CAEEL	Q23419_CAEEL	A0A2K5AU25_CAEEL
molecular_function	GO:0030594	neurotransmitter receptor activity	36	186	0.193548	0.853234	0.192546	1	1	GBR1_CAEEL	ACM3_CAEEL	ACM1_CAEEL	ACR5_CAEEL	G5EBQ0_CAEEL	G5ECV2_CAEEL	O17470_CAEEL	A0A4V0INF0_CAEEL	Q9U2E2_CAEEL	O44986_CAEEL	A0A4V0IJ32_CAEEL	Q2WF65_CAEEL	A0A486WU00_CAEEL	O44452_CAEEL	A0A3P6N6F5_CAEEL	A0A4V6M3Y9_CAEEL	A0A3P6MY71_CAEEL	A0A4V0IN81_CAEEL	Q8MPP4_CAEEL	O45732_CAEEL	A0A0M7RFG1_CAEEL	O45601_CAEEL	A0A4V0IKP2_CAEEL	Q95Q96_CAEEL	A0A4V0IK93_CAEEL	G5ECN1_CAEEL	A0A4V0ILI0_CAEEL	A0A4V0IKM8_CAEEL	U4PM48_CAEEL	A0A4V0IK64_CAEEL	A0A4V0ILX4_CAEEL	A0A3P6NP92_CAEEL	A0A4V0IKB1_CAEEL	H2KYL4_CAEEL	A0A3P6P985_CAEEL	U4PEJ2_CAEEL
biological_process	GO:0018991	oviposition	34	115	0.295652	0.994983	0.00812292	1	0.997	DAF14_CAEEL	CAPS_CAEEL	MADD_CAEEL	KI26L_CAEEL	CBPC6_CAEEL	RPM1_CAEEL	EGL27_CAEEL	UNC53_CAEEL	MYO4_CAEEL	CBPC1_CAEEL	G5EBM0_CAEEL	G5EGE2_CAEEL	G5ECA1_CAEEL	G5ECV2_CAEEL	O17470_CAEEL	G5EDL0_CAEEL	Q7KPP4_CAEEL	O61528_CAEEL	Q7JNG4_CAEEL	Q7JNG6_CAEEL	Q9U3A6_CAEEL	C4ALD5_CAEEL	H2KYM2_CAEEL	G5EEU6_CAEEL	Q8I4H0_CAEEL	H2KYM4_CAEEL	H9G2V2_CAEEL	C8JQR2_CAEEL	Q8I4G9_CAEEL	G5EBX1_CAEEL	H9G2V3_CAEEL	H2KYM3_CAEEL	Q95Q51_CAEEL	A5JYR4_CAEEL
biological_process	GO:0000122	negative regulation of transcription by RNA polymerase II	34	118	0.288136	0.999673	0.000706567	1	0.543	PER_CAEEL	MET2_CAEEL	SDC2_CAEEL	ELT2_CAEEL	LIDB1_CAEEL	HM39_CAEEL	FOXO_CAEEL	EGL43_CAEEL	ELT1_CAEEL	DCP66_CAEEL	SDC3_CAEEL	SEM4_CAEEL	ZAG1_CAEEL	WBS14_CAEEL	HDA4_CAEEL	NHR2_CAEEL	NHR7_CAEEL	NHR85_CAEEL	NHR8_CAEEL	HLH10_CAEEL	DCA11_CAEEL	G5EGS7_CAEEL	G5EGF4_CAEEL	G5EF15_CAEEL	G5EGN3_CAEEL	G5EDL0_CAEEL	Q9XXU5_CAEEL	Q18605_CAEEL	A4LBC3_CAEEL	B7WN96_CAEEL	C6KRL4_CAEEL	A4LBC2_CAEEL	U4PMB4_CAEEL	O01521_CAEEL
biological_process	GO:0006886	intracellular protein transport	34	148	0.22973	0.983692	0.0226884	1	1	RIM_CAEEL	TBC11_CAEEL	STX1A_CAEEL	RIC1_CAEEL	REP1_CAEEL	EAT17_CAEEL	ARL6_CAEEL	CLH_CAEEL	AP2M_CAEEL	Q9U2D8_CAEEL	A0A5E4LYK9_CAEEL	G5EBE2_CAEEL	G5EBY2_CAEEL	Q2EEM5_CAEEL	A0A5E4LXW2_CAEEL	O44412_CAEEL	Q94222_CAEEL	Q23368_CAEEL	K8F7X2_CAEEL	A4UZ34_CAEEL	Q9N4F3_CAEEL	Q22601_CAEEL	A0A5E4M2M0_CAEEL	G5EE94_CAEEL	A0A061ACS9_CAEEL	K8ESB8_CAEEL	A0A5E4LWH4_CAEEL	Q7K711_CAEEL	H1UBJ3_CAEEL	G5EFY6_CAEEL	Q20436_CAEEL	G5EGG0_CAEEL	K8ESI6_CAEEL	Q23419_CAEEL
biological_process	GO:0006468	protein phosphorylation	33	142	0.232394	0.997345	0.00387627	1	0.981	PDPK1_CAEEL	MAK1_CAEEL	IKKE1_CAEEL	KCC2D_CAEEL	CCNE_CAEEL	EGL4_CAEEL	MBK2_CAEEL	ROCK_CAEEL	SEL5_CAEEL	MOM4_CAEEL	PAR1_CAEEL	SPK1_CAEEL	TLK1_CAEEL	TOR_CAEEL	NLK_CAEEL	SULU_CAEEL	CHK1_CAEEL	E2AKA_CAEEL	CDK12_CAEEL	AKT1_CAEEL	Q23128_CAEEL	Q2XN10_CAEEL	F5GUA8_CAEEL	Q21138_CAEEL	Q20483_CAEEL	G5EDZ5_CAEEL	G3MTX3_CAEEL	Q86S44_CAEEL	F5GUA9_CAEEL	Q6A4Q6_CAEEL	E7EM33_CAEEL	Q8I112_CAEEL	Q22022_CAEEL
cellular_component	GO:0005938	cell cortex	33	111	0.297297	1	1.15445e-07	1	0	SEP1_CAEEL	RAC1_CAEEL	BUB1_CAEEL	KC1G_CAEEL	GPA16_CAEEL	DYHC_CAEEL	MBK2_CAEEL	PAR3_CAEEL	PAR1_CAEEL	NLK_CAEEL	SULU_CAEEL	PSA_CAEEL	ANI1_CAEEL	APR1_CAEEL	MIG5_CAEEL	CLH_CAEEL	G5EDS2_CAEEL	G5EBK3_CAEEL	G5EBX0_CAEEL	G5EES2_CAEEL	Q9U364_CAEEL	Q5DX48_CAEEL	Q23542_CAEEL	K8ESK9_CAEEL	O45146_CAEEL	Q9U3A6_CAEEL	E2JKY8_CAEEL	Q8I4H0_CAEEL	Q8I4G9_CAEEL	O02289_CAEEL	E2JKZ0_CAEEL	A5JYR4_CAEEL	H2KZU6_CAEEL
molecular_function	GO:0003676	nucleic acid binding	33	124	0.266129	0.999947	6.85412e-05	1	0.029	RPB9_CAEEL	SMA9_CAEEL	PQE1_CAEEL	YPO4_CAEEL	SYNC_CAEEL	YP93_CAEEL	YQ53_CAEEL	RCANL_CAEEL	GPKOW_CAEEL	A0A0U1RML6_CAEEL	Q09633_CAEEL	O62235_CAEEL	U4PCC4_CAEEL	Q9TZM7_CAEEL	G8JY03_CAEEL	Q9N585_CAEEL	A0A0K3ASS5_CAEEL	Q9N4P3_CAEEL	A0A0U1RML5_CAEEL	O16635_CAEEL	Q9XVF1_CAEEL	Q9XWI1_CAEEL	A0A0K3AY23_CAEEL	Q17467_CAEEL	B3KLZ7_CAEEL	Q86NJ8_CAEEL	A0A0T7CIX3_CAEEL	Q9XVI3_CAEEL	Q27GU1_CAEEL	A0A0K3AV28_CAEEL	H2KZD5_CAEEL	Q09409_CAEEL	P91340_CAEEL
molecular_function	GO:0003779	actin binding	33	89	0.370787	1	4.50469e-38	1	0	DMD_CAEEL	ANC1_CAEEL	EXC6_CAEEL	UNC87_CAEEL	SPE26_CAEEL	ARP2_CAEEL	G5EBK3_CAEEL	G5EC35_CAEEL	G5EES2_CAEEL	A0A1N7SYR7_CAEEL	A0A1N7SYN9_CAEEL	A0A0K3AQU9_CAEEL	G5EFD6_CAEEL	A0A2C9C3A7_CAEEL	A0A486WVF0_CAEEL	A0A486WUT8_CAEEL	G5EEG8_CAEEL	G5EEL1_CAEEL	V6CLV8_CAEEL	H2KYX2_CAEEL	G5EFW3_CAEEL	G5EFG1_CAEEL	Q9XWR0_CAEEL	G5EBP4_CAEEL	G5EG97_CAEEL	G5EFL5_CAEEL	G5EC72_CAEEL	Q95XN3_CAEEL	Q5LK46_CAEEL	G5EEF6_CAEEL	G5EBH3_CAEEL	G5EEP9_CAEEL	H2KYX3_CAEEL
cellular_component	GO:0000139	Golgi membrane	32	192	0.166667	0.902646	0.129601	1	1	EXT2_CAEEL	GSLG1_CAEEL	GOSR2_CAEEL	MGAT1_CAEEL	BRE2_CAEEL	GOGA5_CAEEL	FUTA_CAEEL	COPE_CAEEL	RIC1_CAEEL	YQP4_CAEEL	MAN12_CAEEL	G5EFD3_CAEEL	G5EDS2_CAEEL	G5ED46_CAEEL	O62165_CAEEL	P90904_CAEEL	Q9TYQ6_CAEEL	K8ESK9_CAEEL	Q2EEM5_CAEEL	A0A4V0IKA6_CAEEL	K8FE00_CAEEL	K8F7Z0_CAEEL	Q95ZV3_CAEEL	D0Z5N7_CAEEL	C3JXF0_CAEEL	A0A4V0IM30_CAEEL	A0A4V0IKE4_CAEEL	H2KZQ8_CAEEL	G5EGG0_CAEEL	A0A2K5ATL4_CAEEL	H2KZQ9_CAEEL	G5EDD5_CAEEL
cellular_component	GO:0030425	dendrite	32	150	0.213333	0.999972	5.93902e-05	1	0.02	CNG_CAEEL	EGL10_CAEEL	DAF11_CAEEL	CAM1_CAEEL	IDA1_CAEEL	LIN10_CAEEL	PTRN1_CAEEL	OSM3_CAEEL	STX1A_CAEEL	QUI1_CAEEL	ACM3_CAEEL	ACM1_CAEEL	CELR_CAEEL	ARL6_CAEEL	CLUA1_CAEEL	GCY12_CAEEL	GCY35_CAEEL	CBPC1_CAEEL	AKT1_CAEEL	G5EF06_CAEEL	G5ECV2_CAEEL	G5EFQ4_CAEEL	O17470_CAEEL	O44986_CAEEL	Q9XUT0_CAEEL	A0A486WU00_CAEEL	O45732_CAEEL	A0A486WUN2_CAEEL	O45601_CAEEL	G5EFJ0_CAEEL	G5EGS3_CAEEL	H2KYW1_CAEEL
cellular_component	GO:0031410	cytoplasmic vesicle	32	91	0.351648	1	2.72924e-11	1	0	RAC1_CAEEL	LGG2_CAEEL	PTP2_CAEEL	STNB_CAEEL	PTC3_CAEEL	VIT2_CAEEL	CLH_CAEEL	AP2M_CAEEL	CBPE_CAEEL	G5EED5_CAEEL	U4PRB3_CAEEL	U4PB89_CAEEL	A0A061ACJ2_CAEEL	H2L043_CAEEL	U4PEG5_CAEEL	U4PRB8_CAEEL	A0A061ACM4_CAEEL	U4PM26_CAEEL	U4PB94_CAEEL	A0A061AKQ5_CAEEL	A0A061AJ06_CAEEL	H9G2V2_CAEEL	A0A061ADU4_CAEEL	A0A061AKP8_CAEEL	U4PEG9_CAEEL	H9G2V3_CAEEL	U4PBM1_CAEEL	A0A061ACJ8_CAEEL	Q17911_CAEEL	A0A061ACM9_CAEEL	Q9BI63_CAEEL	A0A061ADT8_CAEEL
biological_process	GO:0008104	protein localization	32	78	0.410256	1	2.16364e-15	1	0	RIM_CAEEL	DYHC2_CAEEL	KLC_CAEEL	KC1G_CAEEL	DYF2_CAEEL	CUL2_CAEEL	LIN10_CAEEL	PAR3_CAEEL	SPD5_CAEEL	PAC1_CAEEL	SLAP2_CAEEL	NPHP1_CAEEL	ZYG1_CAEEL	ANI1_CAEEL	NBEA_CAEEL	CLH_CAEEL	FBLN1_CAEEL	G5EDN8_CAEEL	O44490_CAEEL	O01485_CAEEL	G5EFC7_CAEEL	Q9U3A6_CAEEL	Q22257_CAEEL	H2FLM3_CAEEL	Q22601_CAEEL	Q8I4H0_CAEEL	H2FLM1_CAEEL	O76447_CAEEL	Q8I4G9_CAEEL	H2FLM2_CAEEL	G5EFJ7_CAEEL	A5JYR4_CAEEL
biological_process	GO:0071805	potassium ion transmembrane transport	32	164	0.195122	0.692511	0.373167	1	1	UNC58_CAEEL	G5ED53_CAEEL	G5EC00_CAEEL	Q22042_CAEEL	G5EFI1_CAEEL	Q7JM20_CAEEL	Q8I4L1_CAEEL	H2KZ66_CAEEL	Q8I4L4_CAEEL	G5EER9_CAEEL	O45894_CAEEL	A6ZJ65_CAEEL	Q19464_CAEEL	G5EDK3_CAEEL	G5EEZ9_CAEEL	Q8I4L3_CAEEL	K8FDZ5_CAEEL	G5EDG3_CAEEL	Q22940_CAEEL	G5ECD2_CAEEL	H2KZ65_CAEEL	K8ESK0_CAEEL	Q22043_CAEEL	Q6EUT8_CAEEL	A6ZJ66_CAEEL	Q304E2_CAEEL	Q9XX01_CAEEL	G5EEH1_CAEEL	K8ERV0_CAEEL	Q23297_CAEEL	Q8I4D2_CAEEL	Q8I4L2_CAEEL
molecular_function	GO:0050839	cell adhesion molecule binding	32	41	0.780488	1	1.63225e-25	1	0	SYG1_CAEEL	SYG2_CAEEL	G5ECZ1_CAEEL	Q53U86_CAEEL	Q53U87_CAEEL	G5EBK3_CAEEL	G5EES2_CAEEL	X5LX73_CAEEL	M1ZJY5_CAEEL	X5LX70_CAEEL	Q8I103_CAEEL	X5LPT9_CAEEL	Q9BIC1_CAEEL	X5LV54_CAEEL	A0A2C9C357_CAEEL	H1UBL0_CAEEL	Q4PIU9_CAEEL	Q9BIC0_CAEEL	X5LPU4_CAEEL	Q8T3E1_CAEEL	X5M5Q5_CAEEL	P90848_CAEEL	X5M8U5_CAEEL	X5M8V1_CAEEL	Q56VX4_CAEEL	H1UBK9_CAEEL	Q86NJ4_CAEEL	Q17490_CAEEL	Q18100_CAEEL	Q8MQG0_CAEEL	X5M5P8_CAEEL	Q86NJ3_CAEEL
biological_process	GO:0010172	embryonic body morphogenesis	31	64	0.484375	1	6.45434e-09	1	0	RAC1_CAEEL	CYFIP_CAEEL	MOG5_CAEEL	HMP1_CAEEL	JAC1_CAEEL	ROCK_CAEEL	SYM2_CAEEL	VAB1_CAEEL	DHX16_CAEEL	G5EBM0_CAEEL	G5EG85_CAEEL	G5ECA1_CAEEL	G5EEB3_CAEEL	G5EC35_CAEEL	Q9U9J8_CAEEL	D3DEL8_CAEEL	H1ZUX0_CAEEL	A0A078BPN7_CAEEL	A0A078BS85_CAEEL	G5ECD7_CAEEL	E0AHA7_CAEEL	A0A078BPM1_CAEEL	A0A078BQQ1_CAEEL	H1ZUX1_CAEEL	G5EFW3_CAEEL	G5EG97_CAEEL	A5JYX3_CAEEL	D3DEL7_CAEEL	G5EGT0_CAEEL	G5EBH3_CAEEL	Q22354_CAEEL
molecular_function	GO:0031267	small GTPase binding	31	89	0.348315	0.999997	9.36535e-06	1	0.005	RIM_CAEEL	CYFIP_CAEEL	KRAF1_CAEEL	PLCE1_CAEEL	LIN10_CAEEL	ROCK_CAEEL	UNC89_CAEEL	RIC1_CAEEL	ANI1_CAEEL	Q7KPP4_CAEEL	O61528_CAEEL	G5EFX2_CAEEL	A0A4V0ILM7_CAEEL	A0A5E4LYK9_CAEEL	Q7JNG4_CAEEL	Q7JNG6_CAEEL	A0A5E4LXW2_CAEEL	Q965V4_CAEEL	C4ALD5_CAEEL	A0A5E4M2M0_CAEEL	A0A4V0IL76_CAEEL	H2KYM2_CAEEL	H2KYM4_CAEEL	Q3V5K0_CAEEL	A0A5E4LWH4_CAEEL	D0Z5P0_CAEEL	H2KYM3_CAEEL	Q95Q51_CAEEL	Q23089_CAEEL	G5EGE3_CAEEL	Q22354_CAEEL
biological_process	GO:0007411	axon guidance	31	82	0.378049	1	7.74761e-07	1	0.001	CYFIP_CAEEL	KI26L_CAEEL	CAM1_CAEEL	EFN4_CAEEL	EPI1_CAEEL	ZAG1_CAEEL	UNC53_CAEEL	UNC3_CAEEL	VAB1_CAEEL	RIG6_CAEEL	G5EDQ4_CAEEL	Q19128_CAEEL	G5ECE3_CAEEL	G5EDV5_CAEEL	Q7KPP4_CAEEL	O61528_CAEEL	Q7JNG4_CAEEL	Q7JNG6_CAEEL	U4PBJ9_CAEEL	G5EGA4_CAEEL	C4ALD5_CAEEL	G5EF89_CAEEL	H2KYM2_CAEEL	Q8MQ86_CAEEL	G5EEU6_CAEEL	H2KYM4_CAEEL	Q8T3E5_CAEEL	C8JQR2_CAEEL	G5EBX1_CAEEL	H2KYM3_CAEEL	Q95Q51_CAEEL
biological_process	GO:0042391	regulation of membrane potential	31	163	0.190184	0.866392	0.171625	1	1	RIM_CAEEL	GBR1_CAEEL	PIEZ1_CAEEL	ACR5_CAEEL	G5EBQ0_CAEEL	A0A4V0INF0_CAEEL	Q9U2E2_CAEEL	A0A4V0IJ32_CAEEL	Q2WF65_CAEEL	O44452_CAEEL	A0A3P6N6F5_CAEEL	A0A4V6M3Y9_CAEEL	A0A3P6MY71_CAEEL	A0A4V0IN81_CAEEL	Q8MPP4_CAEEL	P90735_CAEEL	A0A0M7RFG1_CAEEL	A0A4V0IKP2_CAEEL	Q95Q96_CAEEL	A0A4V0IK93_CAEEL	G5ECN1_CAEEL	A0A4V0ILI0_CAEEL	A0A4V0IKM8_CAEEL	U4PM48_CAEEL	A0A4V0IK64_CAEEL	A0A4V0ILX4_CAEEL	A0A3P6NP92_CAEEL	A0A4V0IKB1_CAEEL	H2KYL4_CAEEL	A0A3P6P985_CAEEL	U4PEJ2_CAEEL
cellular_component	GO:0043186	P granule	30	109	0.275229	0.999917	0.000203666	1	0.049	CGH1_CAEEL	MBK2_CAEEL	PAR3_CAEEL	PAR1_CAEEL	YQ12_CAEEL	TG250_CAEEL	NUP98_CAEEL	2AAA_CAEEL	GLS1_CAEEL	ASD2_CAEEL	GLD1_CAEEL	GLD2_CAEEL	GLD4_CAEEL	G5EBQ3_CAEEL	G5ED26_CAEEL	G5EF15_CAEEL	G5ECB9_CAEEL	Q9XVZ6_CAEEL	Q21126_CAEEL	D4YW53_CAEEL	P90786_CAEEL	Q9TZK8_CAEEL	Q18633_CAEEL	Q9TXM1_CAEEL	Q27GU1_CAEEL	Q19818_CAEEL	Q22308_CAEEL	Q688Z3_CAEEL	H2KZD5_CAEEL	Q09409_CAEEL
cellular_component	GO:0005654	nucleoplasm	30	121	0.247934	0.995427	0.00683135	1	0.861	CEP1_CAEEL	DHX9_CAEEL	KS6A1_CAEEL	IMA2_CAEEL	SIR2_CAEEL	SIG7_CAEEL	PAXT1_CAEEL	SMC6_CAEEL	CWC22_CAEEL	WRN_CAEEL	SYM2_CAEEL	LE756_CAEEL	G5EDA3_CAEEL	Q9U203_CAEEL	Q8MXR2_CAEEL	G5EGQ8_CAEEL	X5M5M2_CAEEL	L8E6W9_CAEEL	P91019_CAEEL	Q9N583_CAEEL	H2KZN0_CAEEL	Q9U304_CAEEL	Q95Y84_CAEEL	Q9XXT5_CAEEL	G5EDY1_CAEEL	Q20703_CAEEL	Q9BIB7_CAEEL	Q9U202_CAEEL	Q19818_CAEEL	J7SA49_CAEEL
molecular_function	GO:0005198	structural molecule activity	30	58	0.517241	0.41437	0.634775	1	1	COPE_CAEEL	NUF2_CAEEL	CLH_CAEEL	G5EES2_CAEEL	A0A1N7SYR7_CAEEL	G5EEI5_CAEEL	H9G348_CAEEL	G5EDD3_CAEEL	A0A1N7SYN9_CAEEL	G5EFD1_CAEEL	A0A1N7SYP3_CAEEL	H9G351_CAEEL	G5EFW2_CAEEL	H9G354_CAEEL	G5ECP9_CAEEL	G5ECG8_CAEEL	G5EFD6_CAEEL	G5EEG8_CAEEL	G5EFK7_CAEEL	H9G352_CAEEL	A0A1N7SYN7_CAEEL	G5EFM4_CAEEL	Q22667_CAEEL	H9G353_CAEEL	H9G349_CAEEL	G5EBP4_CAEEL	G5EEC4_CAEEL	H9G350_CAEEL	G5EFY6_CAEEL	G5EEP9_CAEEL
biological_process	GO:0000003	reproduction	29	121	0.239669	1	5.39583e-09	1	0	TRR1_CAEEL	LIPB_CAEEL	HLH2_CAEEL	KRAF1_CAEEL	LIN13_CAEEL	EPI1_CAEEL	RING2_CAEEL	NUF2_CAEEL	RT4I1_CAEEL	YPO4_CAEEL	TIM9_CAEEL	ZYG1_CAEEL	ZYX_CAEEL	APR1_CAEEL	G5EEV6_CAEEL	G5EGL5_CAEEL	G5EDL0_CAEEL	Q21126_CAEEL	P90786_CAEEL	C1P640_CAEEL	C1P641_CAEEL	Q7YXC4_CAEEL	Q8T3E0_CAEEL	Q93194_CAEEL	P90735_CAEEL	Q21295_CAEEL	Q21216_CAEEL	O62217_CAEEL	A5JYS9_CAEEL
cellular_component	GO:0005789	endoplasmic reticulum membrane	29	224	0.129464	0.906897	0.119308	1	1	EXT2_CAEEL	GOSR2_CAEEL	NRA4_CAEEL	ERP1B_CAEEL	UBXN4_CAEEL	ATG2_CAEEL	MYRF1_CAEEL	MYRF2_CAEEL	MOGS1_CAEEL	E2AKA_CAEEL	Q20913_CAEEL	Q9GZI3_CAEEL	Q23368_CAEEL	A0A679L8R0_CAEEL	Q17515_CAEEL	Q9U2S3_CAEEL	Q7KQ29_CAEEL	Q22667_CAEEL	A0A0K3AXE4_CAEEL	G5EFY6_CAEEL	A0A0K3AS30_CAEEL	H2L0M0_CAEEL	Q2PJ77_CAEEL	H2KML1_CAEEL	G5ECZ2_CAEEL	H2L0J6_CAEEL	Q18264_CAEEL	Q9N4L6_CAEEL	Q9U2V5_CAEEL
cellular_component	GO:0031982	vesicle	29	36	0.805556	1	6.60566e-17	1	0	HUM6_CAEEL	G5EDJ6_CAEEL	S6F568_CAEEL	D7SFQ5_CAEEL	W6RRZ0_CAEEL	A0A486WXP9_CAEEL	S6EZR2_CAEEL	A0A168H5A5_CAEEL	A0A168H5E2_CAEEL	Q9U3A6_CAEEL	W6RY57_CAEEL	Q95ZU1_CAEEL	Q20456_CAEEL	D7SFQ6_CAEEL	Q8I7K3_CAEEL	Q8I4H0_CAEEL	D3YT13_CAEEL	Q8I4G9_CAEEL	A0A168H5H9_CAEEL	B6VQ62_CAEEL	S6FD20_CAEEL	G8JY81_CAEEL	A0A163UTE6_CAEEL	A0A168H541_CAEEL	A5JYR4_CAEEL	Q9TZI9_CAEEL	D3YT14_CAEEL	C6KRJ0_CAEEL	Q8MYQ0_CAEEL
biological_process	GO:0051301	cell division	28	138	0.202899	0.996893	0.00477983	1	0.996	SCC3_CAEEL	BUB1_CAEEL	CCNE_CAEEL	KLE2_CAEEL	GPA16_CAEEL	DHX9_CAEEL	NPP5_CAEEL	CDC27_CAEEL	NUF2_CAEEL	SMC3_CAEEL	SMC1_CAEEL	SZY20_CAEEL	LMLN_CAEEL	REI2_CAEEL	ZYG1_CAEEL	ZYG9_CAEEL	NUP98_CAEEL	KNL2_CAEEL	CHK2_CAEEL	Q8MNT1_CAEEL	B2D6L4_CAEEL	Q565A8_CAEEL	U4PEM0_CAEEL	Q9N583_CAEEL	Q95Y84_CAEEL	U4PRH0_CAEEL	U4PBE6_CAEEL	U4PM75_CAEEL
molecular_function	GO:0019901	protein kinase binding	28	98	0.285714	0.993575	0.0111596	1	0.997	RAC1_CAEEL	MAK1_CAEEL	YAP1_CAEEL	UNC22_CAEEL	NBEA_CAEEL	MYSP_CAEEL	LE756_CAEEL	GCK3_CAEEL	G5EC43_CAEEL	G5EG83_CAEEL	G5EDP9_CAEEL	G5EFM0_CAEEL	G5EBV3_CAEEL	G5EEB3_CAEEL	G5EFC7_CAEEL	Q22342_CAEEL	Q8MQ04_CAEEL	H2FLM3_CAEEL	G5ECD7_CAEEL	Q8MQ03_CAEEL	H2FLM1_CAEEL	H2KZ93_CAEEL	H2FLM2_CAEEL	G5EFJ7_CAEEL	G5EGT0_CAEEL	C6KRG5_CAEEL	Q8I112_CAEEL	Q22022_CAEEL
cellular_component	GO:0005813	centrosome	28	92	0.304348	0.999905	0.00023919	1	0.061	PLK3_CAEEL	SEP1_CAEEL	RSA2_CAEEL	BBS1_CAEEL	CDC14_CAEEL	CCNE_CAEEL	MBK2_CAEEL	SPD5_CAEEL	SZY20_CAEEL	ZYG1_CAEEL	ZYG9_CAEEL	2AAA_CAEEL	CLUA1_CAEEL	CLAS2_CAEEL	G5EC43_CAEEL	G5EG83_CAEEL	O61208_CAEEL	Q23542_CAEEL	Q8ITY3_CAEEL	B2D6L4_CAEEL	Q565A8_CAEEL	Q8MQ04_CAEEL	E2JKY8_CAEEL	Q23491_CAEEL	Q9XVI2_CAEEL	Q8MQ03_CAEEL	E2JKZ0_CAEEL	Q95ZN3_CAEEL
biological_process	GO:0034220	ion transmembrane transport	28	171	0.163743	0.173434	0.8526	1	1	GBR1_CAEEL	ACR5_CAEEL	G5EBQ0_CAEEL	A0A4V0INF0_CAEEL	Q9U2E2_CAEEL	A0A4V0IJ32_CAEEL	Q2WF65_CAEEL	O44452_CAEEL	A0A3P6N6F5_CAEEL	A0A4V6M3Y9_CAEEL	A0A3P6MY71_CAEEL	A0A4V0IN81_CAEEL	Q8MPP4_CAEEL	A0A0M7RFG1_CAEEL	A0A4V0IKP2_CAEEL	Q95Q96_CAEEL	A0A4V0IK93_CAEEL	G5ECN1_CAEEL	A0A4V0ILI0_CAEEL	A0A4V0IKM8_CAEEL	U4PM48_CAEEL	A0A4V0IK64_CAEEL	A0A4V0ILX4_CAEEL	A0A3P6NP92_CAEEL	A0A4V0IKB1_CAEEL	H2KYL4_CAEEL	A0A3P6P985_CAEEL	U4PEJ2_CAEEL
molecular_function	GO:0003729	mRNA binding	28	174	0.16092	0.628142	0.441491	1	1	REGE1_CAEEL	LIN41_CAEEL	RLE1_CAEEL	CGH1_CAEEL	YP68_CAEEL	SYM2_CAEEL	ASD2_CAEEL	GLD1_CAEEL	ADR1_CAEEL	FOX1_CAEEL	G5EEW7_CAEEL	G5ECJ4_CAEEL	Q9N4L5_CAEEL	Q9BLA0_CAEEL	Q9TYQ2_CAEEL	Q7JMF0_CAEEL	A0A486WX07_CAEEL	B5BM24_CAEEL	Q23191_CAEEL	Q86G94_CAEEL	Q8MXF3_CAEEL	B5BM23_CAEEL	H2L0D1_CAEEL	Q9U261_CAEEL	M1ZJT7_CAEEL	Q21740_CAEEL	Q21531_CAEEL	H2L0D0_CAEEL
biological_process	GO:0098609	cell-cell adhesion	28	61	0.459016	1	2.68535e-08	1	0	HMR1_CAEEL	HMP1_CAEEL	JAC1_CAEEL	SYG1_CAEEL	SYG2_CAEEL	ZYX_CAEEL	DLG1_CAEEL	CELR_CAEEL	G5EGK1_CAEEL	Q19194_CAEEL	H2KZC7_CAEEL	D3DEL8_CAEEL	X5M8R9_CAEEL	Q8I103_CAEEL	A0A0K3AQU9_CAEEL	H1UBL0_CAEEL	G4S9F5_CAEEL	A0A0K3ATT6_CAEEL	A0A078BPN7_CAEEL	A0A078BS85_CAEEL	A0A078BPM1_CAEEL	A0A078BQQ1_CAEEL	Q56VX4_CAEEL	H1UBK9_CAEEL	X5M5L3_CAEEL	Q95XN3_CAEEL	Q5F4W0_CAEEL	D3DEL7_CAEEL
molecular_function	GO:0004222	metalloendopeptidase activity	28	137	0.20438	0.937627	0.0941542	1	1	PPN1_CAEEL	LMLN_CAEEL	NAS15_CAEEL	NAS22_CAEEL	NAS27_CAEEL	NAS33_CAEEL	NAS34_CAEEL	NAS37_CAEEL	NAS38_CAEEL	NAS9_CAEEL	GON1_CAEEL	MMPB_CAEEL	ADT1_CAEEL	G5EDD1_CAEEL	Q95PY9_CAEEL	G5ED87_CAEEL	G5ED31_CAEEL	B6VQ96_CAEEL	H2L2A7_CAEEL	Q22370_CAEEL	Q86MG1_CAEEL	A0A061ACY6_CAEEL	H2KYL1_CAEEL	Q22580_CAEEL	H2KYL2_CAEEL	Q22763_CAEEL	Q9TZ33_CAEEL	O45569_CAEEL
cellular_component	GO:0098793	presynapse	28	54	0.518519	1	3.15927e-08	1	0	SRBS1_CAEEL	SH3GH_CAEEL	CAPS_CAEEL	SLAP2_CAEEL	CBPE_CAEEL	Q9BIF4_CAEEL	G5EE26_CAEEL	Q14DX2_CAEEL	Q49HI3_CAEEL	G5EEN3_CAEEL	A0A061ACJ2_CAEEL	O44412_CAEEL	A0A061ACM4_CAEEL	A0A061AKQ5_CAEEL	A0A1C3NSJ3_CAEEL	A0A061AJ06_CAEEL	A0A0K3AWP8_CAEEL	H9G2V2_CAEEL	A0A061ADU4_CAEEL	A0A061AKP8_CAEEL	H9G2V3_CAEEL	A0A1C3NSI0_CAEEL	A0A061ACJ8_CAEEL	A0A1C3NSH2_CAEEL	A0A061ACM9_CAEEL	A0A061ADT8_CAEEL	A0A1C3NSN5_CAEEL	A0A1C3NSL4_CAEEL
biological_process	GO:0050877	nervous system process	28	159	0.176101	0.0209365	0.984817	1	1	GBR1_CAEEL	ACR5_CAEEL	G5EBQ0_CAEEL	A0A4V0INF0_CAEEL	Q9U2E2_CAEEL	A0A4V0IJ32_CAEEL	Q2WF65_CAEEL	O44452_CAEEL	A0A3P6N6F5_CAEEL	A0A4V6M3Y9_CAEEL	A0A3P6MY71_CAEEL	A0A4V0IN81_CAEEL	Q8MPP4_CAEEL	A0A0M7RFG1_CAEEL	A0A4V0IKP2_CAEEL	Q95Q96_CAEEL	A0A4V0IK93_CAEEL	G5ECN1_CAEEL	A0A4V0ILI0_CAEEL	A0A4V0IKM8_CAEEL	U4PM48_CAEEL	A0A4V0IK64_CAEEL	A0A4V0ILX4_CAEEL	A0A3P6NP92_CAEEL	A0A4V0IKB1_CAEEL	H2KYL4_CAEEL	A0A3P6P985_CAEEL	U4PEJ2_CAEEL
cellular_component	GO:0015629	actin cytoskeleton	28	57	0.491228	1	1.94435e-16	1	0	HUM6_CAEEL	VINC_CAEEL	ZYX_CAEEL	GELS1_CAEEL	G5ECM5_CAEEL	S6F568_CAEEL	W6RRZ0_CAEEL	S6EZR2_CAEEL	A0A168H5A5_CAEEL	A0A168H5E2_CAEEL	W6RY57_CAEEL	Q95ZU1_CAEEL	Q20456_CAEEL	Q8I7K3_CAEEL	D3YT13_CAEEL	A0A168H5H9_CAEEL	G5EE23_CAEEL	B6VQ62_CAEEL	S6FD20_CAEEL	H2KYW1_CAEEL	G8JY81_CAEEL	A0A163UTE6_CAEEL	A0A168H541_CAEEL	Q9TZI9_CAEEL	D3YT14_CAEEL	G5EG76_CAEEL	C6KRJ0_CAEEL	Q8MYQ0_CAEEL
biological_process	GO:0010628	positive regulation of gene expression	27	94	0.287234	0.986264	0.022442	1	1	PDE1_CAEEL	CNG_CAEEL	KCC2D_CAEEL	FOXO_CAEEL	DAF11_CAEEL	HSF1_CAEEL	HLH2_CAEEL	EGL4_CAEEL	LIN29_CAEEL	MEP1_CAEEL	SKN1_CAEEL	SMA9_CAEEL	NIPI4_CAEEL	UNC89_CAEEL	SPTF1_CAEEL	ZTF16_CAEEL	TOR_CAEEL	GLS1_CAEEL	HIZR1_CAEEL	LE756_CAEEL	LI15A_CAEEL	MMPB_CAEEL	GCK3_CAEEL	ATX2_CAEEL	G5EGE2_CAEEL	A0A131MCL4_CAEEL	Q94239_CAEEL
biological_process	GO:0001764	neuron migration	27	58	0.465517	1	9.05094e-07	1	0.001	RAC1_CAEEL	KI26L_CAEEL	CAM1_CAEEL	EPI1_CAEEL	NAS34_CAEEL	MIG5_CAEEL	G5EGD8_CAEEL	G5EDQ4_CAEEL	G5EDU4_CAEEL	G5EBV3_CAEEL	G5EEV6_CAEEL	G5EDV5_CAEEL	Q7KPP4_CAEEL	O61528_CAEEL	G5EE70_CAEEL	Q7JNG4_CAEEL	Q7JNG6_CAEEL	C1P640_CAEEL	C1P641_CAEEL	G5EGA4_CAEEL	C4ALD5_CAEEL	Q21430_CAEEL	G5EF89_CAEEL	H2KYM2_CAEEL	H2KYM4_CAEEL	H2KYM3_CAEEL	Q95Q51_CAEEL
cellular_component	GO:0005604	basement membrane	27	48	0.5625	1	2.33119e-11	1	0	LAM2_CAEEL	EPI1_CAEEL	PPN1_CAEEL	UNC52_CAEEL	GON1_CAEEL	CO4A1_CAEEL	FBLN1_CAEEL	G5EGK1_CAEEL	G5EDQ4_CAEEL	G5EEV6_CAEEL	G5ECE3_CAEEL	G5EDV5_CAEEL	G5EG33_CAEEL	O44490_CAEEL	G5EEI5_CAEEL	H9G348_CAEEL	H9G351_CAEEL	C1P640_CAEEL	C1P641_CAEEL	H9G354_CAEEL	G5EGA4_CAEEL	G5EF89_CAEEL	H9G352_CAEEL	H9G353_CAEEL	H9G349_CAEEL	H9G350_CAEEL	G5ED27_CAEEL
cellular_component	GO:0005794	Golgi apparatus	26	192	0.135417	0.837273	0.196336	1	1	EXT2_CAEEL	MTP_CAEEL	GNA1_CAEEL	GOSR2_CAEEL	MGAT1_CAEEL	LRK1_CAEEL	GOGA5_CAEEL	PICAL_CAEEL	LIN10_CAEEL	MON2_CAEEL	SRF3_CAEEL	ZDHCS_CAEEL	GON1_CAEEL	G5EDQ5_CAEEL	G5EFD3_CAEEL	G5EGT4_CAEEL	G5ED46_CAEEL	O16637_CAEEL	O18302_CAEEL	Q564T0_CAEEL	Q9N3Y1_CAEEL	A7LPF8_CAEEL	Q9U2K0_CAEEL	Q9U377_CAEEL	A5JYY2_CAEEL	D0Z5P0_CAEEL
molecular_function	GO:0005525	GTP binding	26	270	0.0962963	0.00171448	0.999092	0.243	1	RAC1_CAEEL	DAF11_CAEEL	DAPK_CAEEL	LRK1_CAEEL	GPA16_CAEEL	CNT2_CAEEL	REI2_CAEEL	GUF1_CAEEL	ARL6_CAEEL	GCY12_CAEEL	GCY1_CAEEL	GCY20_CAEEL	GCY23_CAEEL	GCY35_CAEEL	GCY8_CAEEL	G5EBV3_CAEEL	Q9BMU4_CAEEL	Q9XXN4_CAEEL	A4UZ34_CAEEL	Q18965_CAEEL	Q19739_CAEEL	Q688Z6_CAEEL	Q564V6_CAEEL	A0A1X7RBL4_CAEEL	A0A0K3AYI6_CAEEL	P90922_CAEEL
biological_process	GO:0032880	regulation of protein localization	26	56	0.464286	1	3.2397e-08	1	0	HMP1_CAEEL	JAC1_CAEEL	X5LX73_CAEEL	M1ZJY5_CAEEL	Q9U364_CAEEL	X5LX70_CAEEL	D3DEL8_CAEEL	O17939_CAEEL	X5LPT9_CAEEL	Q9BIC1_CAEEL	X5LV54_CAEEL	A0A2C9C357_CAEEL	Q17740_CAEEL	O17666_CAEEL	Q9BIC0_CAEEL	X5LPU4_CAEEL	Q22368_CAEEL	X5M5Q5_CAEEL	D3YT29_CAEEL	X5M8U5_CAEEL	X5M8V1_CAEEL	Q86NJ4_CAEEL	A5JYX3_CAEEL	D3DEL7_CAEEL	X5M5P8_CAEEL	Q86NJ3_CAEEL
biological_process	GO:0040012	regulation of locomotion	25	72	0.347222	1	1.07406e-10	1	0	SEP1_CAEEL	SOL1_CAEEL	GABR2_CAEEL	NFI1_CAEEL	KIN20_CAEEL	GABR1_CAEEL	CLHM1_CAEEL	G5EG85_CAEEL	G5EC35_CAEEL	Q9U9J8_CAEEL	Q7KPP4_CAEEL	O61528_CAEEL	Q7JNG4_CAEEL	Q7JNG6_CAEEL	Q17740_CAEEL	C4ALD5_CAEEL	E0AHA7_CAEEL	H2KYM2_CAEEL	G5EFW3_CAEEL	H2KYM4_CAEEL	G5EG97_CAEEL	H2KYM3_CAEEL	Q95Q51_CAEEL	G5EBH3_CAEEL	Q22354_CAEEL
biological_process	GO:0007155	cell adhesion	25	47	0.531915	1	7.2288e-19	1	0	HM43_CAEEL	EPI1_CAEEL	PAR3_CAEEL	PAT2_CAEEL	SDK_CAEEL	EGL27_CAEEL	LMLN_CAEEL	VINC_CAEEL	DIG1_CAEEL	G5EEV6_CAEEL	X5LPT9_CAEEL	Q9BIC1_CAEEL	I7LFF2_CAEEL	C1P640_CAEEL	C1P641_CAEEL	I7K4K5_CAEEL	I7J4D2_CAEEL	A0A061AJI9_CAEEL	Q8T3E1_CAEEL	P90848_CAEEL	Q86NJ4_CAEEL	A5JYX3_CAEEL	A0A061AD21_CAEEL	Q86NJ3_CAEEL	Q5F4U0_CAEEL
cellular_component	GO:0016324	apical plasma membrane	24	94	0.255319	0.999319	0.00154371	1	0.33	PGP1_CAEEL	LRP_CAEEL	LET4_CAEEL	PAR3_CAEEL	PTC3_CAEEL	DLG1_CAEEL	CLH_CAEEL	AJM1_CAEEL	G5EEW0_CAEEL	G5EBK3_CAEEL	G5EC35_CAEEL	G5EDD3_CAEEL	G5EFD1_CAEEL	G5EFW2_CAEEL	G5ECP9_CAEEL	G5ECG8_CAEEL	G5EFK7_CAEEL	Q21948_CAEEL	G5EFM4_CAEEL	G5EEK0_CAEEL	G5EFW3_CAEEL	G5EG97_CAEEL	G5EEC4_CAEEL	G5EBH3_CAEEL
molecular_function	GO:0061630	ubiquitin protein ligase activity	24	116	0.206897	0.950561	0.078363	1	1	ETC1_CAEEL	RLE1_CAEEL	RING2_CAEEL	RPM1_CAEEL	UBR1_CAEEL	BARD1_CAEEL	Q19019_CAEEL	O62235_CAEEL	Q95ZR5_CAEEL	Q9GUP2_CAEEL	U4PBY0_CAEEL	Q20940_CAEEL	U4PES6_CAEEL	O76671_CAEEL	Q9XWI0_CAEEL	U4PRN6_CAEEL	H2L0J8_CAEEL	Q17911_CAEEL	Q21875_CAEEL	U4PBX5_CAEEL	U4PBJ5_CAEEL	U4PBK1_CAEEL	Q9N3T6_CAEEL	U4PMD1_CAEEL
biological_process	GO:0016567	protein ubiquitination	24	131	0.183206	0.496537	0.576188	1	1	DRE1_CAEEL	CUL2_CAEEL	BAT42_CAEEL	CDC27_CAEEL	SPOP_CAEEL	UBR1_CAEEL	UBE4_CAEEL	BARD1_CAEEL	W6RTE4_CAEEL	O62235_CAEEL	Q9GYQ9_CAEEL	W6RRU8_CAEEL	Q9GUP2_CAEEL	U4PBY0_CAEEL	W6SBC7_CAEEL	U4PES6_CAEEL	A0A0K3AS68_CAEEL	U4PRN6_CAEEL	Q17911_CAEEL	U4PBX5_CAEEL	U4PBJ5_CAEEL	U4PBK1_CAEEL	Q9N3T6_CAEEL	U4PMD1_CAEEL
biological_process	GO:0007264	small GTPase mediated signal transduction	24	52	0.461538	1	8.83139e-09	1	0	RAC1_CAEEL	SOS_CAEEL	PLCE1_CAEEL	REP1_CAEEL	GBAS1_CAEEL	G5EBV3_CAEEL	G5EEN3_CAEEL	G5EFG8_CAEEL	A0A4V0IN51_CAEEL	W6RTN2_CAEEL	O01847_CAEEL	A0A4V0IK11_CAEEL	A0A4V6M3C0_CAEEL	Q86MI5_CAEEL	W6SBJ9_CAEEL	Q20487_CAEEL	A0A4V0IKD8_CAEEL	Q3V5K0_CAEEL	A0A4V0IJW2_CAEEL	H2KZX7_CAEEL	A0A0K3AYI6_CAEEL	A0A486WXD9_CAEEL	A0A4V0IMY5_CAEEL	W6RS10_CAEEL
molecular_function	GO:0004725	protein tyrosine phosphatase activity	24	142	0.169014	0.701506	0.379843	1	1	PTP1_CAEEL	PTP4_CAEEL	CDC14_CAEEL	PTP2_CAEEL	TENSH_CAEEL	VHP1_CAEEL	Q95XJ2_CAEEL	Q20252_CAEEL	Q9U1Q9_CAEEL	Q18385_CAEEL	Q21291_CAEEL	Q20019_CAEEL	O01508_CAEEL	V6CKP5_CAEEL	Q22852_CAEEL	O01923_CAEEL	O17889_CAEEL	A0A2C9C2Y5_CAEEL	U4PMU1_CAEEL	A0A4V0IL30_CAEEL	A0A2C9C318_CAEEL	Q22668_CAEEL	Q21522_CAEEL	A0A2C9C380_CAEEL
biological_process	GO:0007018	microtubule-based movement	24	52	0.461538	0.999946	0.000128508	1	0.105	DYHC2_CAEEL	KI26L_CAEEL	DYHC_CAEEL	OSM3_CAEEL	G5EC43_CAEEL	G5EG83_CAEEL	G5EFQ4_CAEEL	G5EBX0_CAEEL	G5ECC0_CAEEL	V6CL80_CAEEL	Q8MQ20_CAEEL	Q8MQ04_CAEEL	A0A163VTS9_CAEEL	O45087_CAEEL	G5EDV4_CAEEL	Q8MQ03_CAEEL	A0A486WUN2_CAEEL	V6CLB1_CAEEL	G5EFJ0_CAEEL	G5EGS3_CAEEL	Q20888_CAEEL	Q18263_CAEEL	P91400_CAEEL	A0A486WV95_CAEEL
molecular_function	GO:0008528	G protein-coupled peptide receptor activity	23	183	0.125683	0.0418829	0.972961	1	1	YMJC_CAEEL	Q8IFX9_CAEEL	Q19399_CAEEL	Q9XU87_CAEEL	A0A0M6VD42_CAEEL	Q8IFY3_CAEEL	O45174_CAEEL	Q20158_CAEEL	O16980_CAEEL	Q8IFY1_CAEEL	Q95PY1_CAEEL	G5ECH4_CAEEL	A0A1N7SYQ7_CAEEL	P91160_CAEEL	O16416_CAEEL	O16503_CAEEL	Q7YTN4_CAEEL	Q9GRV7_CAEEL	O45776_CAEEL	P91385_CAEEL	Q23293_CAEEL	O45739_CAEEL	Q9XV24_CAEEL
cellular_component	GO:0005730	nucleolus	23	162	0.141975	0.366345	0.708981	1	1	TNKS1_CAEEL	CDC14_CAEEL	CEP1_CAEEL	DHX9_CAEEL	NH2L1_CAEEL	RPB9_CAEEL	PAXT1_CAEEL	SZY20_CAEEL	UBE4_CAEEL	LE756_CAEEL	GLD4_CAEEL	ADR1_CAEEL	O61980_CAEEL	Q9XXN4_CAEEL	B2D6L4_CAEEL	Q565A8_CAEEL	L8E6W9_CAEEL	O01598_CAEEL	Q9U2I4_CAEEL	Q2EEN1_CAEEL	Q9XUE3_CAEEL	Q688Z3_CAEEL	P91340_CAEEL
biological_process	GO:0010468	regulation of gene expression	23	118	0.194915	1	4.22142e-07	1	0.001	SPR3_CAEEL	ELT2_CAEEL	FOXO_CAEEL	DAF11_CAEEL	GLP1_CAEEL	MES2_CAEEL	LIN13_CAEEL	EGL4_CAEEL	MEP1_CAEEL	SKN1_CAEEL	NFYA1_CAEEL	NFYA2_CAEEL	MED15_CAEEL	CNOT1_CAEEL	GEI17_CAEEL	GLD1_CAEEL	ATX2_CAEEL	CATIN_CAEEL	AKT1_CAEEL	FOX1_CAEEL	Q9GUP2_CAEEL	Q9BLA0_CAEEL	P91820_CAEEL
biological_process	GO:1902476	chloride transmembrane transport	23	112	0.205357	0.884753	0.16897	1	1	G5EBQ0_CAEEL	A0A4V0INF0_CAEEL	A0A4V0IJ32_CAEEL	Q2WF65_CAEEL	A0A4V6M3Y9_CAEEL	A0A4V0IN81_CAEEL	Q6A583_CAEEL	A0A4V0IKP2_CAEEL	Q95Q96_CAEEL	A0A4V0IK93_CAEEL	G5ECN1_CAEEL	O44846_CAEEL	A0A4V0ILI0_CAEEL	A0A4V0IKM8_CAEEL	U4PM48_CAEEL	C0P286_CAEEL	A0A4V0IK64_CAEEL	A0A4V0ILX4_CAEEL	A0A4V0IKB1_CAEEL	H2KYL4_CAEEL	G5EBW3_CAEEL	A0A0K3AX20_CAEEL	U4PEJ2_CAEEL
molecular_function	GO:0000146	microfilament motor activity	23	31	0.741935	1	8.57575e-13	1	0	HUM6_CAEEL	MYO2_CAEEL	MYO4_CAEEL	S6F568_CAEEL	W6RRZ0_CAEEL	S6EZR2_CAEEL	A0A168H5A5_CAEEL	A0A168H5E2_CAEEL	W6RY57_CAEEL	Q95ZU1_CAEEL	Q20456_CAEEL	Q8I7K3_CAEEL	D3YT13_CAEEL	A0A168H5H9_CAEEL	B6VQ62_CAEEL	S6FD20_CAEEL	G8JY81_CAEEL	A0A163UTE6_CAEEL	A0A168H541_CAEEL	Q9TZI9_CAEEL	D3YT14_CAEEL	C6KRJ0_CAEEL	Q8MYQ0_CAEEL
cellular_component	GO:0043229	intracellular organelle	22	32	0.6875	1	3.94725e-19	1	0	CGH1_CAEEL	G5EDD3_CAEEL	A0A2C9C2W9_CAEEL	A0A2C9C3B7_CAEEL	G5EFD1_CAEEL	A0A2C9C2V5_CAEEL	A0A2C9C2G8_CAEEL	G5EFW2_CAEEL	G5ECP9_CAEEL	G5ECG8_CAEEL	A0A2I2LDW1_CAEEL	G5EFK7_CAEEL	A0A2I2LDX0_CAEEL	A0A2C9C2V3_CAEEL	G5EFM4_CAEEL	A0A2I2LG13_CAEEL	A0A2I2LDV8_CAEEL	G5EEC4_CAEEL	A0A2I2LDV7_CAEEL	A0A2I2LG61_CAEEL	A0A2C9C332_CAEEL	A0A2C9C2S8_CAEEL
molecular_function	GO:0042626	ATPase-coupled transmembrane transporter activity	22	59	0.372881	0.979836	0.0333336	1	1	PGP1_CAEEL	MRP7_CAEEL	CED7_CAEEL	G4SRS5_CAEEL	Q17645_CAEEL	Q9XW49_CAEEL	Q8MQ16_CAEEL	Q3S1M2_CAEEL	X5LXB2_CAEEL	Q7YZW1_CAEEL	Q20331_CAEEL	Q20943_CAEEL	Q18824_CAEEL	Q95QE2_CAEEL	G5EG58_CAEEL	D3KFS6_CAEEL	C0P274_CAEEL	A0A061ACG9_CAEEL	Q19048_CAEEL	Q1RS86_CAEEL	B6VQ78_CAEEL	Q9TXV8_CAEEL
cellular_component	GO:0042383	sarcolemma	22	36	0.611111	1	1.04441e-10	1	0	DMD_CAEEL	PTRN1_CAEEL	B7WN66_CAEEL	A0A2C9C3F1_CAEEL	A0A2C9C3P6_CAEEL	A0A2C9C3I4_CAEEL	Q94279_CAEEL	A0A2C9C2X2_CAEEL	A0A2C9C388_CAEEL	V6CLV8_CAEEL	Q19185_CAEEL	A0A2C9C390_CAEEL	V6CLR8_CAEEL	A0A2C9C325_CAEEL	I2HAA7_CAEEL	A0A2C9C384_CAEEL	A0A2C9C3E8_CAEEL	V6CJD7_CAEEL	A0A2C9C3G1_CAEEL	A0A2C9C370_CAEEL	I2HAA6_CAEEL	A0A2C9C354_CAEEL
molecular_function	GO:0005230	extracellular ligand-gated ion channel activity	22	132	0.166667	0.628568	0.449823	1	1	ACR5_CAEEL	G5EBQ0_CAEEL	A0A4V0INF0_CAEEL	Q9U2E2_CAEEL	A0A4V0IJ32_CAEEL	I2HA93_CAEEL	Q2WF65_CAEEL	O44452_CAEEL	O44497_CAEEL	A0A4V6M3Y9_CAEEL	A0A4V0IN81_CAEEL	A0A0M7RFG1_CAEEL	A0A4V0IKP2_CAEEL	A0A4V0IK93_CAEEL	G5ECN1_CAEEL	A0A4V0ILI0_CAEEL	A0A4V0IKM8_CAEEL	U4PM48_CAEEL	A0A4V0IK64_CAEEL	A0A4V0ILX4_CAEEL	A0A4V0IKB1_CAEEL	H2KYL4_CAEEL
molecular_function	GO:0140359	ABC-type transporter activity	22	58	0.37931	0.999977	7.08651e-05	1	0.033	MRP7_CAEEL	CED7_CAEEL	G5EDF9_CAEEL	G4SRS5_CAEEL	Q9XW49_CAEEL	Q8MQ16_CAEEL	Q3S1M2_CAEEL	X5LXB2_CAEEL	Q7YZW1_CAEEL	Q20331_CAEEL	Q20943_CAEEL	Q18824_CAEEL	Q95QE2_CAEEL	G5EG58_CAEEL	A0A0K3AU66_CAEEL	A0A0K3AQN5_CAEEL	D3KFS6_CAEEL	A0A0K3AWK1_CAEEL	C0P274_CAEEL	Q19048_CAEEL	Q1RS86_CAEEL	Q9TXV8_CAEEL
biological_process	GO:0008406	gonad development	21	72	0.291667	0.943566	0.0844872	1	1	BUB1_CAEEL	HLH2_CAEEL	CCNE_CAEEL	DRE1_CAEEL	MEP1_CAEEL	PAR3_CAEEL	ZTF16_CAEEL	DIG1_CAEEL	GON1_CAEEL	CATIN_CAEEL	G5EGE2_CAEEL	G5EEY5_CAEEL	H1ZUX0_CAEEL	Q9XVI2_CAEEL	H1ZUX1_CAEEL	H2L2A7_CAEEL	Q21216_CAEEL	A5JYS9_CAEEL	J7SA49_CAEEL	Q9U208_CAEEL	Q95ZN3_CAEEL
molecular_function	GO:0004930	G protein-coupled receptor activity	21	246	0.0853659	5.20373e-06	0.999997	0	1	SRA10_CAEEL	SRA11_CAEEL	SRA29_CAEEL	LPLT1_CAEEL	SRA9_CAEEL	SRA12_CAEEL	YT66_CAEEL	LPLT2_CAEEL	NPR9_CAEEL	CELR_CAEEL	Q19931_CAEEL	A0A4V0ILV8_CAEEL	Q8MQF9_CAEEL	A8WFI5_CAEEL	G5EDR6_CAEEL	Q3Y412_CAEEL	Q21684_CAEEL	H2KZ99_CAEEL	Q18564_CAEEL	H2KZA0_CAEEL	Q9XW96_CAEEL
biological_process	GO:0031122	cytoplasmic microtubule organization	21	31	0.677419	1	4.61283e-10	1	0	DYHC_CAEEL	PTRN1_CAEEL	O61208_CAEEL	A0A1N7SYR7_CAEEL	G5EDD3_CAEEL	Q23542_CAEEL	Q8ITY3_CAEEL	A0A1N7SYN9_CAEEL	G5EFD1_CAEEL	A0A1N7SYP3_CAEEL	G5EFW2_CAEEL	G5ECP9_CAEEL	G5ECG8_CAEEL	E2JKY8_CAEEL	G5EFK7_CAEEL	A0A1N7SYN7_CAEEL	G5EFM4_CAEEL	E2JKZ0_CAEEL	L8EC32_CAEEL	G5EEC4_CAEEL	L8E938_CAEEL
biological_process	GO:0030050	vesicle transport along actin filament	21	29	0.724138	1	4.92691e-11	1	0	HUM6_CAEEL	S6F568_CAEEL	W6RRZ0_CAEEL	S6EZR2_CAEEL	A0A168H5A5_CAEEL	A0A168H5E2_CAEEL	W6RY57_CAEEL	Q95ZU1_CAEEL	Q20456_CAEEL	Q8I7K3_CAEEL	D3YT13_CAEEL	A0A168H5H9_CAEEL	B6VQ62_CAEEL	S6FD20_CAEEL	G8JY81_CAEEL	A0A163UTE6_CAEEL	A0A168H541_CAEEL	Q9TZI9_CAEEL	D3YT14_CAEEL	C6KRJ0_CAEEL	Q8MYQ0_CAEEL
cellular_component	GO:0031430	M band	21	61	0.344262	0.999983	5.77056e-05	1	0.02	PXL1_CAEEL	PAT2_CAEEL	UNC89_CAEEL	ZYX_CAEEL	UNC95_CAEEL	TENSH_CAEEL	UNC52_CAEEL	KETN1_CAEEL	CPNA1_CAEEL	G5EG85_CAEEL	G5EGK1_CAEEL	Q9U9J8_CAEEL	G5EFX2_CAEEL	O61980_CAEEL	Q8MNT0_CAEEL	G4S9F5_CAEEL	E0AHA7_CAEEL	Q95QI3_CAEEL	Q95XN3_CAEEL	Q95QI2_CAEEL	G5EGE3_CAEEL
cellular_component	GO:0030018	Z disc	21	33	0.636364	1	9.273e-11	1	0	B7WN66_CAEEL	A0A2C9C3F1_CAEEL	A0A2C9C3P6_CAEEL	A0A2C9C3I4_CAEEL	Q94279_CAEEL	A0A2C9C2X2_CAEEL	A0A2C9C388_CAEEL	G5EEL1_CAEEL	G5EFG1_CAEEL	A0A2C9C390_CAEEL	A0A2C9C325_CAEEL	G5EFL5_CAEEL	I2HAA7_CAEEL	G5EC72_CAEEL	A0A2C9C384_CAEEL	A0A2C9C3E8_CAEEL	A0A2C9C3G1_CAEEL	G5EEF6_CAEEL	A0A2C9C370_CAEEL	I2HAA6_CAEEL	A0A2C9C354_CAEEL
biological_process	GO:0001708	cell fate specification	20	80	0.25	0.999743	0.000479225	1	0.376	GLP1_CAEEL	HLH2_CAEEL	KRAF1_CAEEL	HM22_CAEEL	LIN29_CAEEL	LIM4_CAEEL	SKN1_CAEEL	TBX11_CAEEL	EGL27_CAEEL	TBX32_CAEEL	TBX35_CAEEL	APR1_CAEEL	G5EGD8_CAEEL	G5EDU4_CAEEL	G5EGF4_CAEEL	G5EF15_CAEEL	G5ECB9_CAEEL	G5EE70_CAEEL	Q95Y06_CAEEL	A0A3B1DQC8_CAEEL
biological_process	GO:0040024	dauer larval development	20	91	0.21978	0.983162	0.0278871	1	1	PDPK1_CAEEL	DAF14_CAEEL	FOXO_CAEEL	DAF11_CAEEL	HSF1_CAEEL	SCD2_CAEEL	SIR2_CAEEL	SMA4_CAEEL	STAT1_CAEEL	UNC3_CAEEL	EAK4_CAEEL	G5EDP9_CAEEL	G5EG65_CAEEL	G5EF88_CAEEL	Q8MQ16_CAEEL	Q3S1M2_CAEEL	Q7YZW1_CAEEL	G5EEV7_CAEEL	Q95QE2_CAEEL	D3YT50_CAEEL
molecular_function	GO:0008289	lipid binding	20	84	0.238095	0.999908	0.000162419	1	0.078	MTP_CAEEL	YQO2_CAEEL	H9G2Z9_CAEEL	A5JYS5_CAEEL	H9G2Z8_CAEEL	X5LXA1_CAEEL	A0A0K3AR19_CAEEL	A0A679L8R0_CAEEL	Q18965_CAEEL	A0A486WX00_CAEEL	Q5WRP6_CAEEL	Q7JM28_CAEEL	G5EBP5_CAEEL	A0A486WXK7_CAEEL	A0A486WTK6_CAEEL	A0A486WWK3_CAEEL	X5LQ14_CAEEL	A0A486WVD0_CAEEL	Q18798_CAEEL	Q18869_CAEEL
cellular_component	GO:0043231	intracellular membrane-bounded organelle	20	229	0.0873362	0.999937	7.60023e-05	1	0.024	CED7_CAEEL	G5EDJ6_CAEEL	G5ED46_CAEEL	Q93242_CAEEL	Q9XW49_CAEEL	D7SFQ5_CAEEL	A0A486WXP9_CAEEL	Q0G821_CAEEL	A0A0M9JJ78_CAEEL	Q9U3A1_CAEEL	X5LXB2_CAEEL	D7SFQ6_CAEEL	Q9TXZ3_CAEEL	O16671_CAEEL	Q9XVL8_CAEEL	A0A0M7RF98_CAEEL	G5EF63_CAEEL	Q1RS86_CAEEL	Q9U3Q6_CAEEL	Q9TXV8_CAEEL
biological_process	GO:0040027	negative regulation of vulval development	20	62	0.322581	0.99924	0.00198002	1	0.832	TRR1_CAEEL	MET2_CAEEL	LI15B_CAEEL	LIN13_CAEEL	RING2_CAEEL	MED12_CAEEL	APR1_CAEEL	LI15A_CAEEL	LIN8_CAEEL	ARK1_CAEEL	Q19019_CAEEL	Q9XX31_CAEEL	O01526_CAEEL	Q95ZR5_CAEEL	H2KZD6_CAEEL	O01525_CAEEL	A4LBC3_CAEEL	Q17911_CAEEL	A4LBC2_CAEEL	O45950_CAEEL
biological_process	GO:0006281	DNA repair	20	96	0.208333	0.883714	0.15367	1	1	SPT16_CAEEL	HPR9_CAEEL	HSR9_CAEEL	ATM_CAEEL	SMC3_CAEEL	SMC1_CAEEL	WRN_CAEEL	BARD1_CAEEL	GEI17_CAEEL	CHK2_CAEEL	N1NTN5_CAEEL	Q18939_CAEEL	Q17971_CAEEL	Q9U2D2_CAEEL	U4PRC2_CAEEL	Q7Z151_CAEEL	P91834_CAEEL	G5EC05_CAEEL	Q18547_CAEEL	Q19520_CAEEL
biological_process	GO:0007186	G protein-coupled receptor signaling pathway	20	222	0.0900901	7.03911e-08	1	0	1	EGL10_CAEEL	GABR2_CAEEL	ACM3_CAEEL	NPR9_CAEEL	GABR1_CAEEL	O44661_CAEEL	F5GUD0_CAEEL	O16931_CAEEL	Q9XXP8_CAEEL	O62279_CAEEL	F5GUC9_CAEEL	G5EDR6_CAEEL	O45284_CAEEL	O45338_CAEEL	O44660_CAEEL	Q966B4_CAEEL	Q7YWZ9_CAEEL	Q9XV82_CAEEL	V5Z1T3_CAEEL	Q17709_CAEEL
biological_process	GO:0006869	lipid transport	20	51	0.392157	0.942561	0.0864124	1	1	ATG2_CAEEL	CED7_CAEEL	A5JYS5_CAEEL	Q9XW49_CAEEL	X5LXA1_CAEEL	A0A679L8R0_CAEEL	X5LXB2_CAEEL	A0A486WX00_CAEEL	Q5WRP6_CAEEL	Q7JM28_CAEEL	G5EBP5_CAEEL	A0A486WXK7_CAEEL	A0A486WTK6_CAEEL	C0P274_CAEEL	A0A486WWK3_CAEEL	X5LQ14_CAEEL	A0A486WVD0_CAEEL	Q1RS86_CAEEL	Q18798_CAEEL	Q9TXV8_CAEEL
cellular_component	GO:0048471	perinuclear region of cytoplasm	19	133	0.142857	0.60659	0.484776	1	1	ANC1_CAEEL	MGAT1_CAEEL	ENPL1_CAEEL	SIR2_CAEEL	SIMR1_CAEEL	SRF3_CAEEL	OSM3_CAEEL	TRA2_CAEEL	VPS53_CAEEL	NBEA_CAEEL	CHK1_CAEEL	GLD4_CAEEL	G5EDQ5_CAEEL	G5EFD3_CAEEL	G5EBG7_CAEEL	A7LPF8_CAEEL	Q9U377_CAEEL	Q9XUE3_CAEEL	Q09409_CAEEL
cellular_component	GO:0000776	kinetochore	19	63	0.301587	0.999095	0.00233212	1	0.484	BUB1_CAEEL	DYHC_CAEEL	NPP5_CAEEL	NUF2_CAEEL	ZYG9_CAEEL	NUP98_CAEEL	KNL2_CAEEL	CLAP3_CAEEL	CLAS2_CAEEL	G5EFM0_CAEEL	G5EDA3_CAEEL	Q23542_CAEEL	Q8MNT1_CAEEL	Q22257_CAEEL	E2JKY8_CAEEL	O76447_CAEEL	E2JKZ0_CAEEL	L8EC32_CAEEL	L8E938_CAEEL
cellular_component	GO:0000785	chromatin	19	74	0.256757	0.978382	0.033401	1	1	SCC3_CAEEL	HSF1_CAEEL	CCNE_CAEEL	DVE1_CAEEL	ATM_CAEEL	SMC3_CAEEL	SMC1_CAEEL	CWC22_CAEEL	TLK1_CAEEL	ZFP1_CAEEL	CEH28_CAEEL	GEI17_CAEEL	Q2XN10_CAEEL	G3MTX3_CAEEL	A4LBC3_CAEEL	G5EC05_CAEEL	A0A0K3AR81_CAEEL	Q19818_CAEEL	A4LBC2_CAEEL
biological_process	GO:0040028	regulation of vulval development	19	43	0.44186	0.999997	7.35481e-06	1	0.003	CDC14_CAEEL	LIN29_CAEEL	PAT2_CAEEL	VAV_CAEEL	NBEA_CAEEL	ADR1_CAEEL	G5EGK1_CAEEL	Q7KPP4_CAEEL	O61528_CAEEL	G5EGI1_CAEEL	Q7JNG4_CAEEL	Q7JNG6_CAEEL	Q17740_CAEEL	C4ALD5_CAEEL	H2KYM2_CAEEL	H2KYM4_CAEEL	U4PRH5_CAEEL	H2KYM3_CAEEL	Q95Q51_CAEEL
biological_process	GO:0000132	establishment of mitotic spindle orientation	19	62	0.306452	0.99802	0.00481731	1	0.996	RAC1_CAEEL	HMR1_CAEEL	GPA16_CAEEL	PAR3_CAEEL	CED7_CAEEL	HMX_CAEEL	MIG5_CAEEL	Q53U86_CAEEL	Q53U87_CAEEL	G5EEN3_CAEEL	Q23542_CAEEL	Q4PIU9_CAEEL	E2JKY8_CAEEL	Q21295_CAEEL	Q21436_CAEEL	E2JKZ0_CAEEL	L8EC32_CAEEL	Q18100_CAEEL	L8E938_CAEEL
biological_process	GO:0055085	transmembrane transport	19	74	0.256757	0.260335	0.770142	1	1	PGP1_CAEEL	MRP7_CAEEL	G4SRS5_CAEEL	Q17645_CAEEL	Q8MQ16_CAEEL	Q3S1M2_CAEEL	A0A3B1E616_CAEEL	Q7YZW1_CAEEL	Q20331_CAEEL	Q20943_CAEEL	Q18824_CAEEL	Q95QE2_CAEEL	G5EG58_CAEEL	D3KFS6_CAEEL	C0P286_CAEEL	A0A061ACG9_CAEEL	Q19048_CAEEL	B6VQ78_CAEEL	G5EBW3_CAEEL
biological_process	GO:0090630	activation of GTPase activity	19	76	0.25	0.977298	0.0424232	1	1	TBC11_CAEEL	CNT2_CAEEL	EAT17_CAEEL	Q9U2D8_CAEEL	Q9U364_CAEEL	G5EBE2_CAEEL	G5EBY2_CAEEL	Q94222_CAEEL	O01847_CAEEL	K8F7X2_CAEEL	G5EE94_CAEEL	A0A061ACS9_CAEEL	K8ESB8_CAEEL	Q7K711_CAEEL	H1UBJ3_CAEEL	Q20436_CAEEL	K8ESI6_CAEEL	Q23419_CAEEL	Q22354_CAEEL
biological_process	GO:0007156	homophilic cell adhesion via plasma membrane adhesion molecules	19	48	0.395833	0.999962	0.000136195	1	0.145	HMR1_CAEEL	RIG6_CAEEL	CELR_CAEEL	Q19128_CAEEL	G5EG33_CAEEL	G5ED46_CAEEL	Q19194_CAEEL	H2KZC7_CAEEL	X5M8R9_CAEEL	A0A4V0IJU8_CAEEL	Q8MQ86_CAEEL	Q8T3E5_CAEEL	A0A4V0IK01_CAEEL	X5M5L3_CAEEL	A0A4V0ILL2_CAEEL	G5ED27_CAEEL	Q5F4W0_CAEEL	A0A4V6M3X3_CAEEL	Q5F4U0_CAEEL
molecular_function	GO:0005543	phospholipid binding	19	31	0.612903	0.99997	6.39881e-05	1	0.029	UNC13_CAEEL	G5EG85_CAEEL	G5EC35_CAEEL	Q9U9J8_CAEEL	S6FN00_CAEEL	A0A486WVF0_CAEEL	E0AHA7_CAEEL	A0A1C3NSJ3_CAEEL	A0A486WUT8_CAEEL	G5EFW3_CAEEL	G5EDN9_CAEEL	G5EG97_CAEEL	A0A1C3NSI0_CAEEL	A0A1C3NSH2_CAEEL	A0A1C3NSN5_CAEEL	A0A1C3NSL4_CAEEL	Q09989_CAEEL	G5EBH3_CAEEL	Q6AHQ8_CAEEL
biological_process	GO:0040018	positive regulation of multicellular organism growth	18	65	0.276923	0.991589	0.0179567	1	1	RIM_CAEEL	LRP_CAEEL	SMA4_CAEEL	SMA9_CAEEL	UNC53_CAEEL	DCA11_CAEEL	G5EFN7_CAEEL	G5EC35_CAEEL	G4SNP7_CAEEL	Q9TXR6_CAEEL	G5EEU6_CAEEL	G5EFW3_CAEEL	C8JQR2_CAEEL	Q17490_CAEEL	G5EBX1_CAEEL	G5EG97_CAEEL	C6KRL4_CAEEL	G5EBH3_CAEEL
biological_process	GO:0045138	nematode male tail tip morphogenesis	18	78	0.230769	0.952852	0.0753103	1	1	PLX2_CAEEL	RAC1_CAEEL	LIN41_CAEEL	HLH2_CAEEL	EFN4_CAEEL	RING2_CAEEL	SMA4_CAEEL	SMA9_CAEEL	VAB3_CAEEL	EGL27_CAEEL	ANI1_CAEEL	G5EBM0_CAEEL	G5EGD8_CAEEL	G5ECA1_CAEEL	G5EDU4_CAEEL	G5EBV3_CAEEL	G5EE70_CAEEL	U4PRY7_CAEEL
cellular_component	GO:0030056	hemidesmosome	18	36	0.5	1	3.63816e-07	1	0	MUA3_CAEEL	Q9UB29_CAEEL	Q9UB28_CAEEL	G5EDN8_CAEEL	A0A1N7SYR7_CAEEL	G5EDD3_CAEEL	H2L0C1_CAEEL	A0A1N7SYN9_CAEEL	G5EFD1_CAEEL	A0A1N7SYP3_CAEEL	G5EFW2_CAEEL	G5ECP9_CAEEL	G5ECG8_CAEEL	Q21430_CAEEL	G5EFK7_CAEEL	A0A1N7SYN7_CAEEL	G5EFM4_CAEEL	G5EEC4_CAEEL
biological_process	GO:0006914	autophagy	18	55	0.327273	0.995402	0.00807718	1	0.997	IKKE1_CAEEL	VPS18_CAEEL	H1UBJ1_CAEEL	A0A486WY26_CAEEL	A0A4V0IKA6_CAEEL	O17102_CAEEL	O62505_CAEEL	Q95ZV3_CAEEL	H2KY88_CAEEL	O61771_CAEEL	A0A4V0IM30_CAEEL	Q9XWQ4_CAEEL	G5EEK5_CAEEL	A0A4V0IKE4_CAEEL	Q8MQ22_CAEEL	H2KZQ8_CAEEL	A0A486WX46_CAEEL	H2KZQ9_CAEEL
molecular_function	GO:0003682	chromatin binding	18	85	0.211765	0.674771	0.41649	1	1	SCC3_CAEEL	HSF1_CAEEL	KLE2_CAEEL	RING2_CAEEL	SPTF3_CAEEL	EGL27_CAEEL	ZFP1_CAEEL	Q1XFY2_CAEEL	G5EEY5_CAEEL	A0A0K3AUG2_CAEEL	Q9XXU5_CAEEL	Q565A2_CAEEL	Q9N583_CAEEL	Q95Y84_CAEEL	A0A0K3ATV0_CAEEL	Q9TZM9_CAEEL	A0A0K3AQW8_CAEEL	Q19520_CAEEL
biological_process	GO:0005975	carbohydrate metabolic process	18	146	0.123288	0.0201661	0.986187	1	1	PARG1_CAEEL	MAN12_CAEEL	A0A4V0IKS1_CAEEL	H2KZ94_CAEEL	Q9TZA0_CAEEL	A0A4V0INJ5_CAEEL	A5JYS4_CAEEL	X5LVA3_CAEEL	X5M5W8_CAEEL	H2L041_CAEEL	A8WFH5_CAEEL	A0A4V0IM10_CAEEL	A0A4V0IND1_CAEEL	O16237_CAEEL	A0A4V0ILL1_CAEEL	X5M907_CAEEL	L8EC33_CAEEL	A0A4V0IK15_CAEEL
cellular_component	GO:0030659	cytoplasmic vesicle membrane	18	64	0.28125	0.999999	1.90264e-06	1	0	CAPS_CAEEL	IDA1_CAEEL	B7WN66_CAEEL	A0A2C9C3F1_CAEEL	A0A2C9C3P6_CAEEL	A0A2C9C3I4_CAEEL	Q94279_CAEEL	A0A2C9C2X2_CAEEL	A0A2C9C388_CAEEL	A0A2C9C390_CAEEL	A0A2C9C325_CAEEL	I2HAA7_CAEEL	A0A2C9C384_CAEEL	A0A2C9C3E8_CAEEL	A0A2C9C3G1_CAEEL	A0A2C9C370_CAEEL	I2HAA6_CAEEL	A0A2C9C354_CAEEL
biological_process	GO:0007169	transmembrane receptor protein tyrosine kinase signaling pathway	18	89	0.202247	0.999997	6.53009e-06	1	0.003	DDRB_CAEEL	CAM1_CAEEL	KIN32_CAEEL	DDRA_CAEEL	SID3_CAEEL	SRC2_CAEEL	ROL3_CAEEL	NIPI4_CAEEL	YS3J_CAEEL	VAB1_CAEEL	ARK1_CAEEL	Q2EEM6_CAEEL	Q9U3B5_CAEEL	Q22243_CAEEL	Q10915_CAEEL	F3NWW5_CAEEL	H2KZN4_CAEEL	H2KZN3_CAEEL
molecular_function	GO:0003777	microtubule motor activity	18	32	0.5625	1	1.53461e-08	1	0	DYHC2_CAEEL	KI26L_CAEEL	OSM3_CAEEL	G5EC43_CAEEL	G5EG83_CAEEL	G5EFQ4_CAEEL	G5EBX0_CAEEL	G5ECC0_CAEEL	V6CL80_CAEEL	Q8MQ20_CAEEL	Q8MQ04_CAEEL	Q8MQ03_CAEEL	A0A486WUN2_CAEEL	V6CLB1_CAEEL	G5EFJ0_CAEEL	G5EGS3_CAEEL	Q20888_CAEEL	P91400_CAEEL
molecular_function	GO:0022841	potassium ion leak channel activity	18	85	0.211765	0.925554	0.121384	1	1	UNC58_CAEEL	Q22042_CAEEL	Q7JM20_CAEEL	H2KZ66_CAEEL	O45894_CAEEL	A6ZJ65_CAEEL	K8FDZ5_CAEEL	Q22940_CAEEL	H2KZ65_CAEEL	K8ESK0_CAEEL	Q22043_CAEEL	Q6EUT8_CAEEL	A6ZJ66_CAEEL	Q304E2_CAEEL	Q9XX01_CAEEL	G5EEH1_CAEEL	K8ERV0_CAEEL	Q23297_CAEEL
biological_process	GO:0030322	stabilization of membrane potential	18	85	0.211765	0.891105	0.168879	1	1	UNC58_CAEEL	Q22042_CAEEL	Q7JM20_CAEEL	H2KZ66_CAEEL	O45894_CAEEL	A6ZJ65_CAEEL	K8FDZ5_CAEEL	Q22940_CAEEL	H2KZ65_CAEEL	K8ESK0_CAEEL	Q22043_CAEEL	Q6EUT8_CAEEL	A6ZJ66_CAEEL	Q304E2_CAEEL	Q9XX01_CAEEL	G5EEH1_CAEEL	K8ERV0_CAEEL	Q23297_CAEEL
molecular_function	GO:0020037	heme binding	17	198	0.0858586	0.00169523	0.999214	0.242	1	GLOB9_CAEEL	GCY35_CAEEL	A0A0K3ATU3_CAEEL	Q17884_CAEEL	Q966A3_CAEEL	Q9N4Q5_CAEEL	Q23117_CAEEL	A0A0K3AU27_CAEEL	A0A0M9JJ78_CAEEL	A0A0K3AUW1_CAEEL	U4PEM4_CAEEL	O16671_CAEEL	A0A0M7RF98_CAEEL	U4PRH5_CAEEL	A0A3B1E4T2_CAEEL	O17241_CAEEL	A0A3B1E9Z1_CAEEL
biological_process	GO:0010629	negative regulation of gene expression	17	64	0.265625	0.99208	0.0114521	1	1	SEA2_CAEEL	MET2_CAEEL	HSF1_CAEEL	LIN41_CAEEL	MES2_CAEEL	SMA9_CAEEL	PQE1_CAEEL	TOR_CAEEL	E2AKA_CAEEL	GLD1_CAEEL	ATX2_CAEEL	FOX1_CAEEL	EFL3_CAEEL	G5EGE2_CAEEL	O62020_CAEEL	A0A061AL58_CAEEL	Q17619_CAEEL
biological_process	GO:0048598	embryonic morphogenesis	17	51	0.333333	1	1.48523e-10	1	0	PHA4_CAEEL	RAC1_CAEEL	BUB1_CAEEL	EXT2_CAEEL	PPN1_CAEEL	ROCK_CAEEL	VAB15_CAEEL	APR1_CAEEL	MIG5_CAEEL	G5EEB3_CAEEL	G5EDN8_CAEEL	Q8I103_CAEEL	H1UBL0_CAEEL	G5ECD7_CAEEL	Q56VX4_CAEEL	H1UBK9_CAEEL	G5EGT0_CAEEL
biological_process	GO:0006508	proteolysis	17	94	0.180851	0.347901	0.690173	1	1	ERP1B_CAEEL	CBPC6_CAEEL	YM9I_CAEEL	PSA_CAEEL	GCP2_CAEEL	AMP2_CAEEL	Q566A9_CAEEL	Q95PY9_CAEEL	Q9U2B2_CAEEL	H2L0M5_CAEEL	A8W765_CAEEL	G5EFJ8_CAEEL	Q65XY4_CAEEL	A0A061ACY6_CAEEL	Q18198_CAEEL	Q9GRV9_CAEEL	G5EC96_CAEEL
biological_process	GO:0030968	endoplasmic reticulum unfolded protein response	17	56	0.303571	0.996052	0.00916387	1	0.999	MTP_CAEEL	GAD3_CAEEL	E2AKA_CAEEL	G5EGB7_CAEEL	Q09396_CAEEL	P91419_CAEEL	Q9XUB6_CAEEL	O16511_CAEEL	Q9NF70_CAEEL	Q20435_CAEEL	O16501_CAEEL	O16500_CAEEL	Q19594_CAEEL	Q9NF22_CAEEL	O16502_CAEEL	Q86S74_CAEEL	Q17400_CAEEL
cellular_component	GO:0045121	membrane raft	17	48	0.354167	0.999608	0.00116903	1	0.281	VAS1_CAEEL	CTS31_CAEEL	YM9I_CAEEL	Q19019_CAEEL	Q95Y17_CAEEL	O76725_CAEEL	Q95ZR5_CAEEL	G5EFJ8_CAEEL	K8ESM2_CAEEL	Q17420_CAEEL	F5GUD3_CAEEL	H2L0Q1_CAEEL	Q18198_CAEEL	Q9GRV9_CAEEL	Q22763_CAEEL	O76836_CAEEL	O45569_CAEEL
biological_process	GO:0048856	anatomical structure development	17	215	0.0790698	1	2.15974e-21	1	0	VAB3_CAEEL	ZAG1_CAEEL	NHR34_CAEEL	NHR41_CAEEL	APTF1_CAEEL	O45494_CAEEL	H9G2Q0_CAEEL	X5LPT9_CAEEL	Q9BKZ8_CAEEL	Q9BIC1_CAEEL	Q9GZF7_CAEEL	Q9NAQ4_CAEEL	Q20744_CAEEL	Q86NJ4_CAEEL	Q22810_CAEEL	Q86NJ3_CAEEL	Q86NE2_CAEEL
biological_process	GO:0032956	regulation of actin cytoskeleton organization	17	32	0.53125	1	5.20903e-15	1	0	RAC1_CAEEL	HMP1_CAEEL	JAC1_CAEEL	D3DEL8_CAEEL	H2KZX8_CAEEL	A0A2K5AU32_CAEEL	A0A2K5AU29_CAEEL	A0A078BPN7_CAEEL	C5NU64_CAEEL	A0A078BS85_CAEEL	A0A2K5AU28_CAEEL	A0A078BPM1_CAEEL	A0A078BQQ1_CAEEL	A0A2K5AU23_CAEEL	A5JYX3_CAEEL	D3DEL7_CAEEL	A0A2K5AU25_CAEEL
cellular_component	GO:0030054	cell junction	17	46	0.369565	1	1.38616e-32	1	0	CYFIP_CAEEL	PAC1_CAEEL	TENSH_CAEEL	DLG1_CAEEL	MIG5_CAEEL	G5EG85_CAEEL	G5EG53_CAEEL	G5EDQ4_CAEEL	G5EDV5_CAEEL	Q9U9J8_CAEEL	S6FN00_CAEEL	G5EGA4_CAEEL	Q20079_CAEEL	E0AHA7_CAEEL	G5EF89_CAEEL	H2L0C7_CAEEL	G4SI07_CAEEL
biological_process	GO:0007399	nervous system development	17	62	0.274194	1	6.70199e-15	1	0	HMR1_CAEEL	LIDB1_CAEEL	DAF11_CAEEL	EGL43_CAEEL	HM24_CAEEL	LIN10_CAEEL	UNC53_CAEEL	ZYX_CAEEL	CEH28_CAEEL	DIG1_CAEEL	APR1_CAEEL	HLH34_CAEEL	FOX1_CAEEL	G5EEW7_CAEEL	Q9U364_CAEEL	Q86G94_CAEEL	M1ZJT7_CAEEL
biological_process	GO:0016246	RNA interference	17	43	0.395349	0.999935	0.000205167	1	0.208	RENT1_CAEEL	ERGO1_CAEEL	SID3_CAEEL	ZFP1_CAEEL	YQ53_CAEEL	G5EBQ3_CAEEL	Q17968_CAEEL	Q9BI64_CAEEL	Q1T6W7_CAEEL	Q3S1M2_CAEEL	Q19672_CAEEL	O62011_CAEEL	Q20331_CAEEL	Q58AA4_CAEEL	Q9BL68_CAEEL	H2KYL3_CAEEL	H2KZD5_CAEEL
biological_process	GO:0018107	peptidyl-threonine phosphorylation	17	32	0.53125	0.999999	4.60656e-06	1	0.002	IKKE1_CAEEL	KCC2D_CAEEL	MBK1_CAEEL	MBK2_CAEEL	ROCK_CAEEL	MOM4_CAEEL	NLK_CAEEL	UNC22_CAEEL	GCK3_CAEEL	AKT1_CAEEL	F5GUA8_CAEEL	Q9XVH4_CAEEL	G5EDZ5_CAEEL	F5GUA9_CAEEL	Q21025_CAEEL	Q9U2J3_CAEEL	E7EM33_CAEEL
cellular_component	GO:0005871	kinesin complex	17	31	0.548387	1	2.09748e-07	1	0	KI26L_CAEEL	OSM3_CAEEL	G5EC43_CAEEL	G5EG83_CAEEL	G5EFQ4_CAEEL	G5EBX0_CAEEL	G5ECC0_CAEEL	V6CL80_CAEEL	Q8MQ20_CAEEL	Q8MQ04_CAEEL	Q8MQ03_CAEEL	A0A486WUN2_CAEEL	V6CLB1_CAEEL	G5EFJ0_CAEEL	G5EGS3_CAEEL	Q20888_CAEEL	P91400_CAEEL
cellular_component	GO:0110165	cellular anatomical entity	17	48	0.354167	0.509831	0.578162	1	1	D0VWL6_CAEEL	U4PB58_CAEEL	U4PBJ9_CAEEL	U4PRA0_CAEEL	A0A4V0INA2_CAEEL	U4PB53_CAEEL	U4PEE8_CAEEL	U4PM01_CAEEL	U4PEE3_CAEEL	U4PBK4_CAEEL	U4PR92_CAEEL	A0A4V0IN32_CAEEL	A0A4V0IK09_CAEEL	U4PM09_CAEEL	U4PR97_CAEEL	U4PM04_CAEEL	U4PEF1_CAEEL
cellular_component	GO:0043204	perikaryon	16	83	0.192771	0.926215	0.123279	1	1	KCC2D_CAEEL	DAF11_CAEEL	DDRB_CAEEL	CAM1_CAEEL	ELT1_CAEEL	DDRA_CAEEL	IDA1_CAEEL	LIN10_CAEEL	PTRN1_CAEEL	TDC1_CAEEL	VPS53_CAEEL	QUI1_CAEEL	RIG6_CAEEL	GCY12_CAEEL	CBPC1_CAEEL	CBPE_CAEEL
biological_process	GO:0043652	engulfment of apoptotic cell	16	28	0.571429	0.999999	3.25697e-06	1	0.002	RAC1_CAEEL	APR1_CAEEL	CED2_CAEEL	CED8_CAEEL	G5EBV3_CAEEL	G5EEN3_CAEEL	Q7KPP4_CAEEL	O61528_CAEEL	Q7JNG4_CAEEL	Q7JNG6_CAEEL	C4ALD5_CAEEL	H2KYM2_CAEEL	H2KYM4_CAEEL	C0P274_CAEEL	H2KYM3_CAEEL	Q95Q51_CAEEL
molecular_function	GO:0003724	RNA helicase activity	16	63	0.253968	0.982748	0.035218	1	1	RENT1_CAEEL	DDX47_CAEEL	MOG5_CAEEL	DHX9_CAEEL	CGH1_CAEEL	DHX15_CAEEL	DHX16_CAEEL	G5ED26_CAEEL	Q9XVZ6_CAEEL	G8JY03_CAEEL	O01598_CAEEL	H2KAQ0_CAEEL	A0A486WUJ5_CAEEL	Q22308_CAEEL	Q688Z3_CAEEL	P91340_CAEEL
biological_process	GO:0009888	tissue development	16	49	0.326531	0.999998	3.57519e-06	1	0.002	LAM2_CAEEL	MES2_CAEEL	EPI1_CAEEL	UNC52_CAEEL	NFYA1_CAEEL	NFYA2_CAEEL	G5EGF4_CAEEL	G5ECE3_CAEEL	G5EGN3_CAEEL	A0A0K3AUG2_CAEEL	Q9N2W3_CAEEL	A0A0K3ATV0_CAEEL	A0A061ACV8_CAEEL	B7WN96_CAEEL	A0A0K3AQW8_CAEEL	U4PMB4_CAEEL
biological_process	GO:0005977	glycogen metabolic process	16	30	0.533333	0.999826	0.000578619	1	0.416	U4PS34_CAEEL	U4PF78_CAEEL	U4PCE2_CAEEL	Q86D12_CAEEL	U4PMS5_CAEEL	Q9XUS4_CAEEL	Q9XUS6_CAEEL	U4PC02_CAEEL	H2L0I6_CAEEL	Q9XUS5_CAEEL	U4PCD4_CAEEL	Q8WQE5_CAEEL	U4PC07_CAEEL	Q69Z13_CAEEL	U4PF86_CAEEL	H2L0I5_CAEEL
biological_process	GO:0006629	lipid metabolic process	16	85	0.188235	1.90099e-08	1	0	1	CUBN_CAEEL	FAT1_CAEEL	A0A4V0IN51_CAEEL	Q20177_CAEEL	Q23244_CAEEL	A0A4V0IK11_CAEEL	Q7YX60_CAEEL	A0A4V6M3C0_CAEEL	O61218_CAEEL	Q9XTU3_CAEEL	Q19891_CAEEL	O76635_CAEEL	Q17437_CAEEL	A0A4V0IKD8_CAEEL	A0A4V0IJW2_CAEEL	A0A4V0IMY5_CAEEL
biological_process	GO:0030198	extracellular matrix organization	16	50	0.32	0.999603	0.000974704	1	0.655	PPN1_CAEEL	GON1_CAEEL	MMPB_CAEEL	ADT1_CAEEL	CO4A1_CAEEL	FBLN1_CAEEL	G5EDQ4_CAEEL	G5EDV5_CAEEL	G5EGA4_CAEEL	Q8T3E1_CAEEL	P90848_CAEEL	G5EF89_CAEEL	A0A061AIV4_CAEEL	Q9NAQ4_CAEEL	A0A061AKL1_CAEEL	A0A061ADQ1_CAEEL
biological_process	GO:0008078	mesodermal cell migration	16	22	0.727273	1	9.69784e-09	1	0	KI26L_CAEEL	DRE1_CAEEL	UNC53_CAEEL	G5EBV3_CAEEL	Q7KPP4_CAEEL	O61528_CAEEL	Q7JNG4_CAEEL	Q7JNG6_CAEEL	C4ALD5_CAEEL	H2KYM2_CAEEL	G5EEU6_CAEEL	H2KYM4_CAEEL	C8JQR2_CAEEL	G5EBX1_CAEEL	H2KYM3_CAEEL	Q95Q51_CAEEL
biological_process	GO:0051209	release of sequestered calcium ion into cytosol	16	17	0.941176	1	2.09544e-10	1	0	B7WN66_CAEEL	A0A2C9C3F1_CAEEL	A0A2C9C3P6_CAEEL	A0A2C9C3I4_CAEEL	Q94279_CAEEL	A0A2C9C2X2_CAEEL	A0A2C9C388_CAEEL	A0A2C9C390_CAEEL	A0A2C9C325_CAEEL	I2HAA7_CAEEL	A0A2C9C384_CAEEL	A0A2C9C3E8_CAEEL	A0A2C9C3G1_CAEEL	A0A2C9C370_CAEEL	I2HAA6_CAEEL	A0A2C9C354_CAEEL
biological_process	GO:0043161	proteasome-mediated ubiquitin-dependent protein catabolic process	16	88	0.181818	0.425156	0.643817	1	1	BAT42_CAEEL	RLE1_CAEEL	SPOP_CAEEL	DCA11_CAEEL	Q9GUP2_CAEEL	O61792_CAEEL	U4PBY0_CAEEL	U4PES6_CAEEL	Q9NA71_CAEEL	U4PRN6_CAEEL	U4PBX5_CAEEL	U4PBJ5_CAEEL	C6KRL4_CAEEL	U4PBK1_CAEEL	Q966I8_CAEEL	U4PMD1_CAEEL
cellular_component	GO:0033017	sarcoplasmic reticulum membrane	16	20	0.8	1	7.225e-11	1	0	B7WN66_CAEEL	A0A2C9C3F1_CAEEL	A0A2C9C3P6_CAEEL	A0A2C9C3I4_CAEEL	Q94279_CAEEL	A0A2C9C2X2_CAEEL	A0A2C9C388_CAEEL	A0A2C9C390_CAEEL	A0A2C9C325_CAEEL	I2HAA7_CAEEL	A0A2C9C384_CAEEL	A0A2C9C3E8_CAEEL	A0A2C9C3G1_CAEEL	A0A2C9C370_CAEEL	I2HAA6_CAEEL	A0A2C9C354_CAEEL
cellular_component	GO:0034704	calcium channel complex	16	16	1	0.999908	0.000303668	1	0.068	B7WN66_CAEEL	A0A2C9C3F1_CAEEL	A0A2C9C3P6_CAEEL	A0A2C9C3I4_CAEEL	Q94279_CAEEL	A0A2C9C2X2_CAEEL	A0A2C9C388_CAEEL	A0A2C9C390_CAEEL	A0A2C9C325_CAEEL	I2HAA7_CAEEL	A0A2C9C384_CAEEL	A0A2C9C3E8_CAEEL	A0A2C9C3G1_CAEEL	A0A2C9C370_CAEEL	I2HAA6_CAEEL	A0A2C9C354_CAEEL
cellular_component	GO:0005790	smooth endoplasmic reticulum	16	16	1	1	2.63706e-14	1	0	B7WN66_CAEEL	A0A2C9C3F1_CAEEL	A0A2C9C3P6_CAEEL	A0A2C9C3I4_CAEEL	Q94279_CAEEL	A0A2C9C2X2_CAEEL	A0A2C9C388_CAEEL	A0A2C9C390_CAEEL	A0A2C9C325_CAEEL	I2HAA7_CAEEL	A0A2C9C384_CAEEL	A0A2C9C3E8_CAEEL	A0A2C9C3G1_CAEEL	A0A2C9C370_CAEEL	I2HAA6_CAEEL	A0A2C9C354_CAEEL
molecular_function	GO:0048763	calcium-induced calcium release activity	16	16	1	1	1.63581e-13	1	0	B7WN66_CAEEL	A0A2C9C3F1_CAEEL	A0A2C9C3P6_CAEEL	A0A2C9C3I4_CAEEL	Q94279_CAEEL	A0A2C9C2X2_CAEEL	A0A2C9C388_CAEEL	A0A2C9C390_CAEEL	A0A2C9C325_CAEEL	I2HAA7_CAEEL	A0A2C9C384_CAEEL	A0A2C9C3E8_CAEEL	A0A2C9C3G1_CAEEL	A0A2C9C370_CAEEL	I2HAA6_CAEEL	A0A2C9C354_CAEEL
molecular_function	GO:0005219	ryanodine-sensitive calcium-release channel activity	16	16	1	1	1.63581e-13	1	0	B7WN66_CAEEL	A0A2C9C3F1_CAEEL	A0A2C9C3P6_CAEEL	A0A2C9C3I4_CAEEL	Q94279_CAEEL	A0A2C9C2X2_CAEEL	A0A2C9C388_CAEEL	A0A2C9C390_CAEEL	A0A2C9C325_CAEEL	I2HAA7_CAEEL	A0A2C9C384_CAEEL	A0A2C9C3E8_CAEEL	A0A2C9C3G1_CAEEL	A0A2C9C370_CAEEL	I2HAA6_CAEEL	A0A2C9C354_CAEEL
biological_process	GO:0040025	vulval development	15	79	0.189873	0.999957	8.37747e-05	1	0.065	LIDB1_CAEEL	KI26L_CAEEL	HLH2_CAEEL	KRAF1_CAEEL	MEP1_CAEEL	PAR1_CAEEL	APR1_CAEEL	LI15A_CAEEL	G5EBM0_CAEEL	G5ECA1_CAEEL	G5EDL0_CAEEL	Q9U3E2_CAEEL	Q19739_CAEEL	G5EES3_CAEEL	G5EGR6_CAEEL
biological_process	GO:0048477	oogenesis	15	51	0.294118	0.998358	0.00309259	1	0.953	LARP1_CAEEL	CSN2_CAEEL	KRAF1_CAEEL	PTP2_CAEEL	CSN1_CAEEL	CGH1_CAEEL	ROCK_CAEEL	PSA_CAEEL	CNOT1_CAEEL	GCK1_CAEEL	GLD1_CAEEL	DAZ1_CAEEL	AMP2_CAEEL	G5EBQ3_CAEEL	Q21295_CAEEL
biological_process	GO:0051321	meiotic cell cycle	15	74	0.202703	0.999507	0.000834137	1	0.637	MET2_CAEEL	ETC1_CAEEL	CCNE_CAEEL	KRAF1_CAEEL	CDC27_CAEEL	SMC6_CAEEL	GLS1_CAEEL	KNL2_CAEEL	GCK1_CAEEL	GCK3_CAEEL	GLD1_CAEEL	GLD2_CAEEL	GLD4_CAEEL	O61208_CAEEL	Q8ITY3_CAEEL
biological_process	GO:0006897	endocytosis	15	114	0.131579	0.999993	1.34673e-05	1	0.007	LRP_CAEEL	KC1G_CAEEL	CNT2_CAEEL	SLAP2_CAEEL	AP2M_CAEEL	G5ED80_CAEEL	Q9BIF4_CAEEL	O01485_CAEEL	Q9N372_CAEEL	W6RRZ0_CAEEL	Q19739_CAEEL	W6RY57_CAEEL	Q5FC45_CAEEL	Q23566_CAEEL	Q9TZI9_CAEEL
biological_process	GO:0007606	sensory perception of chemical stimulus	15	179	0.0837989	0.00169949	0.999134	0.493	1	SRG5_CAEEL	SRA10_CAEEL	SRE29_CAEEL	SRA29_CAEEL	SCD2_CAEEL	SRE33_CAEEL	SRG3_CAEEL	SRE32_CAEEL	SRE30_CAEEL	Q22284_CAEEL	G5EBI9_CAEEL	Q5WRM6_CAEEL	G5EGM5_CAEEL	D1MN82_CAEEL	Q9XW96_CAEEL
cellular_component	GO:0005929	cilium	15	78	0.192308	0.85917	0.186925	1	1	DYF2_CAEEL	PKD1_CAEEL	OSM3_CAEEL	TTLL9_CAEEL	NPHP1_CAEEL	TTC30_CAEEL	CLUA1_CAEEL	GCY12_CAEEL	GCY23_CAEEL	GCY8_CAEEL	CBPC1_CAEEL	K0M7B5_CAEEL	S6FMZ4_CAEEL	S6FCY3_CAEEL	J7S130_CAEEL
biological_process	GO:0042048	olfactory behavior	15	195	0.0769231	0.000388904	0.999827	0.167	1	VDAC_CAEEL	CNG_CAEEL	DYF2_CAEEL	O44661_CAEEL	O16931_CAEEL	Q9XXP8_CAEEL	O62279_CAEEL	O45284_CAEEL	O45338_CAEEL	O44660_CAEEL	Q966B4_CAEEL	Q7YWZ9_CAEEL	Q9XV82_CAEEL	V5Z1T3_CAEEL	Q17709_CAEEL
molecular_function	GO:0016787	hydrolase activity	15	97	0.154639	0.362301	0.662895	1	1	RENT1_CAEEL	LIP1_CAEEL	ENPP1_CAEEL	RETR1_CAEEL	YQ12_CAEEL	YP93_CAEEL	G5ED26_CAEEL	A0A131MBP8_CAEEL	O76677_CAEEL	O01598_CAEEL	Q9U2D2_CAEEL	A0A131MB53_CAEEL	Q9GYT3_CAEEL	Q9XWI1_CAEEL	P91470_CAEEL
molecular_function	GO:0003924	GTPase activity	15	199	0.0753769	0.000279785	0.999887	0.028	1	RAC1_CAEEL	GPA16_CAEEL	CNT2_CAEEL	GUF1_CAEEL	ARL6_CAEEL	G5EBV3_CAEEL	Q9BMU4_CAEEL	A4UZ34_CAEEL	Q18965_CAEEL	Q19739_CAEEL	Q688Z6_CAEEL	Q564V6_CAEEL	A0A1X7RBL4_CAEEL	A0A0K3AYI6_CAEEL	P90922_CAEEL
biological_process	GO:0016079	synaptic vesicle exocytosis	15	23	0.652174	1	3.22579e-07	1	0.001	CAPS_CAEEL	UNC13_CAEEL	SYB1_CAEEL	CLA1_CAEEL	A0A061ACJ2_CAEEL	A0A061ACM4_CAEEL	A0A061AKQ5_CAEEL	A0A061AJ06_CAEEL	H9G2V2_CAEEL	A0A061ADU4_CAEEL	A0A061AKP8_CAEEL	H9G2V3_CAEEL	A0A061ACJ8_CAEEL	A0A061ACM9_CAEEL	A0A061ADT8_CAEEL
biological_process	GO:0016192	vesicle-mediated transport	15	88	0.170455	1	5.42702e-08	1	0	STNB_CAEEL	YC2L_CAEEL	REP1_CAEEL	ARL6_CAEEL	CLA1_CAEEL	AP2M_CAEEL	O44412_CAEEL	Q9N4F3_CAEEL	G5EDP5_CAEEL	Q23056_CAEEL	Q9XVL8_CAEEL	Q8I4L8_CAEEL	G5EFC6_CAEEL	A0A2K5ATL4_CAEEL	G5EDD5_CAEEL
molecular_function	GO:0019904	protein domain specific binding	15	55	0.272727	0.996049	0.00755532	1	0.982	PKD1_CAEEL	UNC95_CAEEL	VAB1_CAEEL	B6GUP8_CAEEL	Q8MNT0_CAEEL	Q9U3A6_CAEEL	O17666_CAEEL	G5EER5_CAEEL	Q95QI3_CAEEL	Q9XXM9_CAEEL	Q8I4H0_CAEEL	Q8I4G9_CAEEL	G5EF62_CAEEL	A5JYR4_CAEEL	Q95QI2_CAEEL
cellular_component	GO:0031012	extracellular matrix	15	56	0.267857	0.999999	2.11352e-06	1	0	PPN1_CAEEL	UNC52_CAEEL	GON1_CAEEL	MMPB_CAEEL	ADT1_CAEEL	CO4A1_CAEEL	G5EDQ4_CAEEL	G5EDV5_CAEEL	G5EEP7_CAEEL	G5EDT4_CAEEL	G5EGA4_CAEEL	Q8T3E1_CAEEL	P90848_CAEEL	G5EF89_CAEEL	Q9NAQ4_CAEEL
molecular_function	GO:0000287	magnesium ion binding	15	91	0.164835	0.624784	0.486527	1	1	IPYR_CAEEL	KS6A1_CAEEL	MOM4_CAEEL	G5EFA4_CAEEL	D3KFW7_CAEEL	A0A061AKZ2_CAEEL	Q9TXV2_CAEEL	G5EE78_CAEEL	H9G330_CAEEL	H9G331_CAEEL	G5EG63_CAEEL	H9G329_CAEEL	U4PBV8_CAEEL	H9G328_CAEEL	G5EBW1_CAEEL
biological_process	GO:0045773	positive regulation of axon extension	15	17	0.882353	1	6.81211e-08	1	0	ZAG1_CAEEL	UNC53_CAEEL	Q7KPP4_CAEEL	O61528_CAEEL	Q7JNG4_CAEEL	Q7JNG6_CAEEL	Q9XUT0_CAEEL	C4ALD5_CAEEL	H2KYM2_CAEEL	G5EEU6_CAEEL	H2KYM4_CAEEL	C8JQR2_CAEEL	G5EBX1_CAEEL	H2KYM3_CAEEL	Q95Q51_CAEEL
molecular_function	GO:0004843	thiol-dependent deubiquitinase	15	83	0.180723	0.759167	0.339705	1	1	G5EGM9_CAEEL	V6CM05_CAEEL	G2HK03_CAEEL	Q9TYY8_CAEEL	K8ESL3_CAEEL	O44438_CAEEL	Q9N4T5_CAEEL	V6CJY2_CAEEL	A5PEX6_CAEEL	G5EG81_CAEEL	Q9U207_CAEEL	G2HK02_CAEEL	N1NTH7_CAEEL	Q93875_CAEEL	N1NVC2_CAEEL
biological_process	GO:0060465	pharynx development	14	42	0.333333	0.999541	0.00133382	1	0.772	PHA4_CAEEL	SPT16_CAEEL	EXT2_CAEEL	ROCK_CAEEL	SRC2_CAEEL	TBX35_CAEEL	UNC52_CAEEL	HLH6_CAEEL	Q23390_CAEEL	O16511_CAEEL	O16501_CAEEL	O16500_CAEEL	G5EFW3_CAEEL	O16502_CAEEL
biological_process	GO:0006470	protein dephosphorylation	14	71	0.197183	0.363076	0.734375	1	1	PTP4_CAEEL	CDC14_CAEEL	VHP1_CAEEL	2AAA_CAEEL	A0A1N7SYT5_CAEEL	Q18385_CAEEL	A0A1N7SYW5_CAEEL	Q20019_CAEEL	O01508_CAEEL	Q22852_CAEEL	Q17744_CAEEL	O17889_CAEEL	H8W3X6_CAEEL	Q21522_CAEEL
biological_process	GO:0006935	chemotaxis	14	61	0.229508	1	3.67285e-07	1	0.001	PDE1_CAEEL	CNG_CAEEL	DAF11_CAEEL	CHE1_CAEEL	DYF2_CAEEL	EGL4_CAEEL	SCD2_CAEEL	IF122_CAEEL	MACO1_CAEEL	CLUA1_CAEEL	GCY1_CAEEL	AKT1_CAEEL	ADR1_CAEEL	Q19523_CAEEL
biological_process	GO:0030334	regulation of cell migration	14	76	0.184211	0.90763	0.135909	1	1	PLX2_CAEEL	RAC1_CAEEL	LRP_CAEEL	KI26L_CAEEL	EGL43_CAEEL	RING2_CAEEL	EGL27_CAEEL	APR1_CAEEL	LE756_CAEEL	CATIN_CAEEL	U4PF39_CAEEL	U4PRY7_CAEEL	Q3V5K0_CAEEL	U4PBW0_CAEEL
cellular_component	GO:0000793	condensed chromosome	14	54	0.259259	0.999921	0.000161907	1	0.041	SCC3_CAEEL	TRR1_CAEEL	MBK2_CAEEL	ZFP1_CAEEL	PSA_CAEEL	G5EDA3_CAEEL	O17724_CAEEL	Q9XXI9_CAEEL	Q9N583_CAEEL	Q95Y84_CAEEL	Q19220_CAEEL	Q9XVR7_CAEEL	D4PH99_CAEEL	D2Y8W2_CAEEL
biological_process	GO:0031581	hemidesmosome assembly	14	32	0.4375	0.99993	0.000301363	1	0.251	EGL27_CAEEL	UNC52_CAEEL	Q9UB28_CAEEL	G5ECJ4_CAEEL	G5EEI5_CAEEL	H9G348_CAEEL	H2KMJ3_CAEEL	Q9GUP2_CAEEL	H9G351_CAEEL	H9G354_CAEEL	H9G352_CAEEL	H9G353_CAEEL	H9G349_CAEEL	H9G350_CAEEL
cellular_component	GO:0005777	peroxisome	14	55	0.254545	0.918752	0.128615	1	1	ACS7_CAEEL	EST1_CAEEL	ACX14_CAEEL	ACX15_CAEEL	ACX12_CAEEL	ACX13_CAEEL	O17762_CAEEL	Q7JLJ0_CAEEL	Q20278_CAEEL	Q17499_CAEEL	A0A061AKU6_CAEEL	O62263_CAEEL	A5Z2S3_CAEEL	O17892_CAEEL
cellular_component	GO:0005635	nuclear envelope	14	66	0.212121	0.996583	0.006405	1	0.85	SEP1_CAEEL	TM201_CAEEL	ANC1_CAEEL	KLC_CAEEL	DYHC_CAEEL	IMA2_CAEEL	NUP98_CAEEL	2AAA_CAEEL	MACO1_CAEEL	G5EFM0_CAEEL	Q965V4_CAEEL	Q9XXT5_CAEEL	Q21295_CAEEL	A0A2C9C2Z1_CAEEL
cellular_component	GO:0005819	spindle	14	39	0.358974	0.999983	4.26376e-05	1	0.011	SEP1_CAEEL	CDC14_CAEEL	DYHC_CAEEL	ANI1_CAEEL	K0M7B5_CAEEL	Q23542_CAEEL	S6FMZ4_CAEEL	O17666_CAEEL	E2JKY8_CAEEL	S6FCY3_CAEEL	Q8MQ03_CAEEL	O76447_CAEEL	E2JKZ0_CAEEL	J7S130_CAEEL
molecular_function	GO:0016491	oxidoreductase activity	14	154	0.0909091	6.34084e-13	1	0	1	GAD3_CAEEL	RT4I1_CAEEL	DHS27_CAEEL	Q9XXU5_CAEEL	Q9XUS8_CAEEL	Q17726_CAEEL	Q19890_CAEEL	Q9NA71_CAEEL	Q23569_CAEEL	O61198_CAEEL	O76383_CAEEL	O17892_CAEEL	Q19687_CAEEL	O16214_CAEEL
molecular_function	GO:0042802	identical protein binding	14	97	0.14433	0.752571	0.325039	1	1	CNG_CAEEL	KCC2D_CAEEL	MEP1_CAEEL	SPD5_CAEEL	ZYG1_CAEEL	UNC3_CAEEL	G5EBM0_CAEEL	G5EG83_CAEEL	G5ECA1_CAEEL	G5EGS7_CAEEL	O18302_CAEEL	Q8IG33_CAEEL	U4PEM4_CAEEL	U4PRH5_CAEEL
biological_process	GO:0007638	mechanosensory behavior	14	46	0.304348	0.993793	0.0153708	1	1	MEC2_CAEEL	LIDB1_CAEEL	G5ECJ4_CAEEL	Q5ZR40_CAEEL	Q9U3E2_CAEEL	A5A8R1_CAEEL	Q5ZR41_CAEEL	Q5ZR42_CAEEL	H2KZ68_CAEEL	Q5ZR35_CAEEL	Q5ZR39_CAEEL	G3MVG9_CAEEL	H2KZ67_CAEEL	Q5ZR36_CAEEL
biological_process	GO:0006511	ubiquitin-dependent protein catabolic process	14	133	0.105263	0.191024	0.846779	1	1	ETC1_CAEEL	DRE1_CAEEL	PICAL_CAEEL	RLE1_CAEEL	UBQL_CAEEL	O62235_CAEEL	G5EGM9_CAEEL	Q9TYY8_CAEEL	O76671_CAEEL	V6CJY2_CAEEL	G5EG81_CAEEL	N1NTH7_CAEEL	Q93875_CAEEL	N1NVC2_CAEEL
biological_process	GO:0018996	molting cycle, collagen and cuticulin-based cuticle	14	75	0.186667	0.600199	0.497332	1	1	BED3_CAEEL	DRE1_CAEEL	PTC3_CAEEL	NAS22_CAEEL	NAS27_CAEEL	NAS33_CAEEL	NAS34_CAEEL	NAS37_CAEEL	NAS38_CAEEL	MYRF1_CAEEL	NHR23_CAEEL	H8W3Y1_CAEEL	H2KZ73_CAEEL	Q8T3B7_CAEEL
cellular_component	GO:0000932	P-body	14	45	0.311111	0.999054	0.00289431	1	0.631	LARP1_CAEEL	LIN41_CAEEL	CGH1_CAEEL	YPO4_CAEEL	CNOT1_CAEEL	DCPS_CAEEL	Q17740_CAEEL	Q8ITV7_CAEEL	G5EES3_CAEEL	G5EFX8_CAEEL	Q21740_CAEEL	G5EGR6_CAEEL	Q19818_CAEEL	Q8ITV6_CAEEL
biological_process	GO:0000209	protein polyubiquitination	14	80	0.175	0.613625	0.495051	1	1	ETC1_CAEEL	RLE1_CAEEL	UBE4_CAEEL	G5EDT9_CAEEL	Q9GUP2_CAEEL	U4PBY0_CAEEL	U4PES6_CAEEL	Q9XWI0_CAEEL	U4PRN6_CAEEL	H2L0J8_CAEEL	U4PBX5_CAEEL	U4PBJ5_CAEEL	U4PBK1_CAEEL	U4PMD1_CAEEL
biological_process	GO:0007283	spermatogenesis	13	57	0.22807	0.87625	0.193075	1	1	TRR1_CAEEL	CGH1_CAEEL	SIMR1_CAEEL	TRA2_CAEEL	UNC13_CAEEL	GCK3_CAEEL	ATX2_CAEEL	G5EBQ3_CAEEL	P90786_CAEEL	H9G2S6_CAEEL	Q3S1J8_CAEEL	H9G2S7_CAEEL	Q9TZI9_CAEEL
biological_process	GO:0009408	response to heat	13	57	0.22807	0.852487	0.223887	1	1	SEA2_CAEEL	HSF1_CAEEL	EPI1_CAEEL	RLE1_CAEEL	SKN1_CAEEL	DCPS_CAEEL	G5EG65_CAEEL	G5EEV6_CAEEL	O17470_CAEEL	C1P640_CAEEL	C1P641_CAEEL	Q93759_CAEEL	Q93194_CAEEL
biological_process	GO:0007635	chemosensory behavior	13	48	0.270833	0.00880119	0.994786	0.98	1	PDE1_CAEEL	CNG_CAEEL	DYHC2_CAEEL	DAF25_CAEEL	CAPS_CAEEL	CHE1_CAEEL	DYF2_CAEEL	EGL4_CAEEL	CLUA1_CAEEL	GCY1_CAEEL	BLI4_CAEEL	AKT1_CAEEL	Q95XA9_CAEEL
biological_process	GO:0008045	motor neuron axon guidance	13	43	0.302326	0.996124	0.0102017	1	0.999	PLX2_CAEEL	RAC1_CAEEL	DDRB_CAEEL	DDRA_CAEEL	UNC53_CAEEL	RIG6_CAEEL	G5EG53_CAEEL	G5EBV3_CAEEL	O61528_CAEEL	Q22852_CAEEL	O17889_CAEEL	H2L0C7_CAEEL	H9G306_CAEEL
cellular_component	GO:0000922	spindle pole	13	30	0.433333	0.996188	0.00984802	1	0.926	PLK3_CAEEL	CDC14_CAEEL	DYHC_CAEEL	ZYG9_CAEEL	O61208_CAEEL	G5EBX0_CAEEL	Q23542_CAEEL	Q8ITY3_CAEEL	O17666_CAEEL	E2JKY8_CAEEL	E2JKZ0_CAEEL	L8EC32_CAEEL	L8E938_CAEEL
cellular_component	GO:0042995	cell projection	13	37	0.351351	1	2.28519e-16	1	0	RAC1_CAEEL	CAM1_CAEEL	PXL1_CAEEL	HLH6_CAEEL	CLUA1_CAEEL	G5EG85_CAEEL	G5ECM5_CAEEL	Q9U9J8_CAEEL	A0A1N7SYR7_CAEEL	G5EDD3_CAEEL	A0A1N7SYN9_CAEEL	S6FN00_CAEEL	E0AHA7_CAEEL
biological_process	GO:0007030	Golgi organization	13	44	0.295455	0.983146	0.0346613	1	1	GOGA5_CAEEL	A0A4V0IKA6_CAEEL	Q9TXV2_CAEEL	Q9N3Y1_CAEEL	Q95ZV3_CAEEL	Q22368_CAEEL	Q19989_CAEEL	U4PBV8_CAEEL	D0Z5P0_CAEEL	A0A4V0IM30_CAEEL	A0A4V0IKE4_CAEEL	H2KZQ8_CAEEL	H2KZQ9_CAEEL
cellular_component	GO:0097730	non-motile cilium	13	82	0.158537	0.806283	0.286287	1	1	CNG_CAEEL	DYHC2_CAEEL	DAF11_CAEEL	DAF25_CAEEL	DYF2_CAEEL	PKD1_CAEEL	OSM3_CAEEL	NPHP1_CAEEL	IF122_CAEEL	CLHM1_CAEEL	GCY12_CAEEL	G5ED37_CAEEL	G5EFQ4_CAEEL
molecular_function	GO:0005272	sodium channel activity	13	22	0.590909	0.999294	0.00194839	1	0.595	MEC2_CAEEL	G5EGI5_CAEEL	A0A4V0ILZ4_CAEEL	A0A4V6M3V2_CAEEL	H2FLF8_CAEEL	A0A4V0ILJ5_CAEEL	A0A4V0IJ47_CAEEL	A0A4V0IKC5_CAEEL	E5QCG1_CAEEL	H2FLG0_CAEEL	H2FLF9_CAEEL	A0A4V0IN98_CAEEL	Q93597_CAEEL
biological_process	GO:0009612	response to mechanical stimulus	13	29	0.448276	0.997272	0.00677752	1	0.996	MEC2_CAEEL	PIEZ1_CAEEL	LIN10_CAEEL	Q5ZR40_CAEEL	A5A8R1_CAEEL	Q5ZR41_CAEEL	Q5ZR42_CAEEL	H2KZ68_CAEEL	Q5ZR35_CAEEL	Q5ZR39_CAEEL	G3MVG9_CAEEL	H2KZ67_CAEEL	Q5ZR36_CAEEL
cellular_component	GO:0043235	receptor complex	13	57	0.22807	0.997003	0.00633263	1	0.85	DDRB_CAEEL	CAM1_CAEEL	DDRA_CAEEL	YS3J_CAEEL	VAB1_CAEEL	Q9UB29_CAEEL	Q9UB28_CAEEL	H2L0C1_CAEEL	Q21948_CAEEL	Q10915_CAEEL	F3NWW5_CAEEL	H2KZN4_CAEEL	H2KZN3_CAEEL
cellular_component	GO:0030017	sarcomere	13	40	0.325	1	1.08471e-15	1	0	ZPR1_CAEEL	Q53U86_CAEEL	Q53U87_CAEEL	Q21000_CAEEL	Q4PIU9_CAEEL	Q86D12_CAEEL	Q9XUS4_CAEEL	Q9XUS6_CAEEL	Q18100_CAEEL	Q9XUS5_CAEEL	Q17636_CAEEL	Q8WQE5_CAEEL	Q69Z13_CAEEL
cellular_component	GO:0031594	neuromuscular junction	13	35	0.371429	0.999839	0.000641467	1	0.175	SH3GH_CAEEL	GBR1_CAEEL	CAM1_CAEEL	RPM1_CAEEL	UNC13_CAEEL	G5EE26_CAEEL	G5EBQ0_CAEEL	Q14DX2_CAEEL	Q49HI3_CAEEL	A0A0K3AR90_CAEEL	Q19280_CAEEL	A0A0K3ATN9_CAEEL	A0A0K3AWL6_CAEEL
cellular_component	GO:0031234	extrinsic component of cytoplasmic side of plasma membrane	13	56	0.232143	0.779612	0.3183	1	1	KIN32_CAEEL	SID3_CAEEL	SRC2_CAEEL	ROL3_CAEEL	NIPI4_CAEEL	ARK1_CAEEL	Q9U3A6_CAEEL	Q2EEM6_CAEEL	Q9U3B5_CAEEL	Q22243_CAEEL	Q8I4H0_CAEEL	Q8I4G9_CAEEL	A5JYR4_CAEEL
molecular_function	GO:0004713	protein tyrosine kinase activity	13	73	0.178082	0.600805	0.493873	1	1	DDRB_CAEEL	MADD3_CAEEL	MBK1_CAEEL	KIN32_CAEEL	MBK2_CAEEL	SID3_CAEEL	SRC2_CAEEL	VAB1_CAEEL	ARK1_CAEEL	A0A061AKR6_CAEEL	Q2EEM6_CAEEL	Q9U3B5_CAEEL	Q22243_CAEEL
molecular_function	GO:0004842	ubiquitin-protein transferase activity	13	64	0.203125	0.810717	0.245208	1	1	LIN41_CAEEL	CUL2_CAEEL	RLE1_CAEEL	YQDA_CAEEL	G5EDT9_CAEEL	W6RTE4_CAEEL	Q9GYQ9_CAEEL	W6RRU8_CAEEL	W6SBC7_CAEEL	Q9NA71_CAEEL	Q9XWI0_CAEEL	Q17911_CAEEL	Q19818_CAEEL
cellular_component	GO:0030139	endocytic vesicle	13	36	0.361111	0.992249	0.0168342	1	0.989	LRP_CAEEL	CLH_CAEEL	G5ED80_CAEEL	I1W6S5_CAEEL	O01485_CAEEL	S6EZU2_CAEEL	W6RRZ0_CAEEL	Q22601_CAEEL	W6RY57_CAEEL	Q5FC45_CAEEL	Q9U2T9_CAEEL	Q9TZI9_CAEEL	Q22354_CAEEL
cellular_component	GO:0016328	lateral plasma membrane	13	20	0.65	1	2.70963e-07	1	0	GLP1_CAEEL	DLG1_CAEEL	G5ECZ1_CAEEL	G5EG85_CAEEL	G5EGK1_CAEEL	Q53U86_CAEEL	Q53U87_CAEEL	Q9U9J8_CAEEL	Q4PIU9_CAEEL	E0AHA7_CAEEL	Q17490_CAEEL	Q18100_CAEEL	Q8MQG0_CAEEL
biological_process	GO:0006516	glycoprotein catabolic process	13	23	0.565217	0.999971	0.000151931	1	0.152	G5EFH6_CAEEL	A0A131MBP8_CAEEL	O76677_CAEEL	A0A131MCH9_CAEEL	A0A0K3AVD4_CAEEL	A0A0K3AW37_CAEEL	A0A0K3AT32_CAEEL	A0A131MB53_CAEEL	Q9GYT3_CAEEL	A0A0K3AYC5_CAEEL	A0A0K3ASH9_CAEEL	P91470_CAEEL	A0A0K3ASI0_CAEEL
molecular_function	GO:0071949	FAD binding	13	45	0.288889	0.991799	0.0201547	1	1	KMO_CAEEL	GAD3_CAEEL	MTHR_CAEEL	ACX14_CAEEL	ACX15_CAEEL	ACX12_CAEEL	ACX13_CAEEL	Q7JLJ0_CAEEL	B5BM30_CAEEL	O61198_CAEEL	O17892_CAEEL	Q8I4K2_CAEEL	Q21794_CAEEL
biological_process	GO:0007517	muscle organ development	13	27	0.481481	1	9.51379e-08	1	0	PTP2_CAEEL	UN105_CAEEL	UNC52_CAEEL	MYOD1_CAEEL	CO4A1_CAEEL	G5EEI5_CAEEL	H9G348_CAEEL	H9G351_CAEEL	H9G354_CAEEL	H9G352_CAEEL	H9G353_CAEEL	H9G349_CAEEL	H9G350_CAEEL
biological_process	GO:0016579	protein deubiquitination	13	75	0.173333	0.636393	0.475044	1	1	G5EGM9_CAEEL	G2HK03_CAEEL	Q9TYY8_CAEEL	K8ESL3_CAEEL	O44438_CAEEL	V6CJY2_CAEEL	A5PEX6_CAEEL	G5EG81_CAEEL	Q9U207_CAEEL	G2HK02_CAEEL	N1NTH7_CAEEL	Q93875_CAEEL	N1NVC2_CAEEL
biological_process	GO:0006898	receptor-mediated endocytosis	13	27	0.481481	0.999945	0.0001879	1	0.185	PICAL_CAEEL	CLH_CAEEL	AP2M_CAEEL	G5EDJ6_CAEEL	D7SFQ5_CAEEL	Q9N4F3_CAEEL	Q9U3A6_CAEEL	Q22601_CAEEL	D7SFQ6_CAEEL	Q8I4H0_CAEEL	Q21948_CAEEL	Q8I4G9_CAEEL	A5JYR4_CAEEL
cellular_component	GO:0044233	mitochondria-associated endoplasmic reticulum membrane	13	15	0.866667	1	7.40184e-10	1	0	A5JYS5_CAEEL	H1UBJ1_CAEEL	X5LXA1_CAEEL	A0A486WX00_CAEEL	Q5WRP6_CAEEL	Q7JM28_CAEEL	A0A486WXK7_CAEEL	A0A486WTK6_CAEEL	Q9XWQ4_CAEEL	A0A486WWK3_CAEEL	X5LQ14_CAEEL	A0A486WVD0_CAEEL	Q18798_CAEEL
biological_process	GO:0035025	positive regulation of Rho protein signal transduction	13	17	0.764706	1	9.52013e-08	1	0	Q7KPP4_CAEEL	O61528_CAEEL	Q7JNG4_CAEEL	A0A4V0ILV8_CAEEL	Q7JNG6_CAEEL	C4ALD5_CAEEL	H2KYM2_CAEEL	H2KYM4_CAEEL	H2KYM3_CAEEL	Q95Q51_CAEEL	H2KZ99_CAEEL	Q18564_CAEEL	H2KZA0_CAEEL
biological_process	GO:0050829	defense response to Gram-negative bacterium	12	106	0.113208	0.0806316	0.954537	1	1	PGP1_CAEEL	ELT2_CAEEL	FOXO_CAEEL	HSF1_CAEEL	SKN1_CAEEL	RT4I1_CAEEL	MMPB_CAEEL	GCY35_CAEEL	Q17645_CAEEL	Q27GU4_CAEEL	Q9XUF6_CAEEL	O76836_CAEEL
molecular_function	GO:0046983	protein dimerization activity	12	64	0.1875	0.713186	0.362488	1	1	NGN1_CAEEL	MIG39_CAEEL	HLH11_CAEEL	WBS14_CAEEL	HLH6_CAEEL	NDF1_CAEEL	HLH34_CAEEL	G5EFL9_CAEEL	Q8I7I9_CAEEL	C0P286_CAEEL	A0A1C3NSK7_CAEEL	G5EBW3_CAEEL
molecular_function	GO:0003713	transcription coactivator activity	12	56	0.214286	0.86449	0.221417	1	1	HCF1_CAEEL	GLP1_CAEEL	MBK1_CAEEL	SMA9_CAEEL	YAP1_CAEEL	MED12_CAEEL	MED15_CAEEL	G5EGI1_CAEEL	Q20563_CAEEL	Q9XVI2_CAEEL	Q9XXT5_CAEEL	Q95ZN3_CAEEL
biological_process	GO:0046662	regulation of oviposition	12	67	0.179104	0.431869	0.673654	1	1	EGL10_CAEEL	DAF25_CAEEL	EGL4_CAEEL	NFI1_CAEEL	UNC13_CAEEL	PSA_CAEEL	AMP2_CAEEL	DYC1_CAEEL	F5GUD0_CAEEL	H2L0M5_CAEEL	F5GUC9_CAEEL	G5EDN9_CAEEL
molecular_function	GO:0004197	cysteine-type endopeptidase activity	12	68	0.176471	0.471213	0.644546	1	1	SEP1_CAEEL	G5EGM9_CAEEL	G2HK03_CAEEL	Q23491_CAEEL	K8ESL3_CAEEL	A5PEX6_CAEEL	G5EG81_CAEEL	Q9U207_CAEEL	G2HK02_CAEEL	N1NTH7_CAEEL	Q93875_CAEEL	N1NVC2_CAEEL
biological_process	GO:0010171	body morphogenesis	12	27	0.444444	1	3.5828e-07	1	0.001	RAC1_CAEEL	HLH2_CAEEL	RPM1_CAEEL	EGL27_CAEEL	AP2M_CAEEL	G5EC35_CAEEL	G4SNP7_CAEEL	Q9TXR6_CAEEL	G5EFW3_CAEEL	Q17490_CAEEL	G5EG97_CAEEL	G5EBH3_CAEEL
cellular_component	GO:0005925	focal adhesion	12	27	0.444444	0.999974	0.000142802	1	0.037	SRBS1_CAEEL	KIN32_CAEEL	PXL1_CAEEL	NIPI4_CAEEL	VINC_CAEEL	ZYX_CAEEL	UNC95_CAEEL	G5EGK1_CAEEL	A0A0K3AQU9_CAEEL	G4S9F5_CAEEL	A0A0K3ATT6_CAEEL	Q95XN3_CAEEL
biological_process	GO:0040034	regulation of development, heterochronic	12	30	0.4	0.999447	0.00208006	1	0.873	PER_CAEEL	SEA2_CAEEL	LIN41_CAEEL	DRE1_CAEEL	LIN29_CAEEL	G5EF06_CAEEL	G5EGS7_CAEEL	O62020_CAEEL	Q17740_CAEEL	G5EES3_CAEEL	U4PRH5_CAEEL	Q19818_CAEEL
molecular_function	GO:0003712	transcription coregulator activity	12	71	0.169014	0.746643	0.322977	1	1	MED13_CAEEL	MED8_CAEEL	MED14_CAEEL	PXL1_CAEEL	GEI17_CAEEL	Q18605_CAEEL	K8F7U3_CAEEL	K8ES81_CAEEL	K8ERR8_CAEEL	Q21216_CAEEL	A5JYS9_CAEEL	K8ESF3_CAEEL
biological_process	GO:0006417	regulation of translation	12	26	0.461538	0.847422	0.205117	1	1	SEA2_CAEEL	CYFIP_CAEEL	ERGO1_CAEEL	DHX9_CAEEL	SKN1_CAEEL	TOR_CAEEL	A0A7R9XLP7_CAEEL	Q20306_CAEEL	A0A7R9XMZ3_CAEEL	A0A7R9XN27_CAEEL	O18218_CAEEL	O62486_CAEEL
cellular_component	GO:0045211	postsynaptic membrane	12	68	0.176471	0.798322	0.304431	1	1	SOL1_CAEEL	ACM1_CAEEL	ACR5_CAEEL	G5EF06_CAEEL	G5EEH3_CAEEL	G5EBQ0_CAEEL	G5ED46_CAEEL	Q9XUT0_CAEEL	A0A3P6N6F5_CAEEL	A0A3P6MY71_CAEEL	A0A3P6NP92_CAEEL	A0A3P6P985_CAEEL
molecular_function	GO:0005102	signaling receptor binding	12	73	0.164384	0.218863	0.828809	1	1	KIN32_CAEEL	SID3_CAEEL	SRC2_CAEEL	ROL3_CAEEL	NIPI4_CAEEL	ARK1_CAEEL	G5EG53_CAEEL	Q2EEM6_CAEEL	Q9U3B5_CAEEL	Q22243_CAEEL	Q21875_CAEEL	Q93930_CAEEL
molecular_function	GO:0003743	translation initiation factor activity	12	54	0.222222	0.921764	0.140821	1	1	EIF3D_CAEEL	EIF3L_CAEEL	EIF3I_CAEEL	MXT_CAEEL	A0A1N7SYP6_CAEEL	A0A1N7SYR1_CAEEL	Q7JMF0_CAEEL	A0A486WX07_CAEEL	B5BM24_CAEEL	B5BM23_CAEEL	A0A1N7SYP7_CAEEL	Q21531_CAEEL
molecular_function	GO:0016301	kinase activity	12	85	0.141176	0.999989	1.59807e-05	1	0.007	G5EDP9_CAEEL	Q18930_CAEEL	P91182_CAEEL	Q0PDK5_CAEEL	Q22721_CAEEL	Q21430_CAEEL	Q17796_CAEEL	D3YT29_CAEEL	P91986_CAEEL	Q8I112_CAEEL	F5GU77_CAEEL	Q22022_CAEEL
biological_process	GO:0006887	exocytosis	12	35	0.342857	0.999998	5.23789e-06	1	0.003	CAPS_CAEEL	EXOC4_CAEEL	IDA1_CAEEL	STX1A_CAEEL	EXOC5_CAEEL	A0A5E4LYK9_CAEEL	A0A5E4LXW2_CAEEL	A0A0K3AR90_CAEEL	A0A5E4M2M0_CAEEL	A0A0K3ATN9_CAEEL	A0A5E4LWH4_CAEEL	A0A0K3AWL6_CAEEL
biological_process	GO:1990504	dense core granule exocytosis	12	18	0.666667	1	3.2733e-10	1	0	CAPS_CAEEL	A0A061ACJ2_CAEEL	A0A061ACM4_CAEEL	A0A061AKQ5_CAEEL	A0A061AJ06_CAEEL	H9G2V2_CAEEL	A0A061ADU4_CAEEL	A0A061AKP8_CAEEL	H9G2V3_CAEEL	A0A061ACJ8_CAEEL	A0A061ACM9_CAEEL	A0A061ADT8_CAEEL
molecular_function	GO:0045296	cadherin binding	12	20	0.6	0.999999	9.27444e-06	1	0.004	HMP1_CAEEL	JAC1_CAEEL	D3DEL8_CAEEL	I7LFF2_CAEEL	I7K4K5_CAEEL	I7J4D2_CAEEL	A0A078BPN7_CAEEL	A0A078BS85_CAEEL	A0A078BPM1_CAEEL	A0A078BQQ1_CAEEL	A5JYX3_CAEEL	D3DEL7_CAEEL
molecular_function	GO:0038022	G protein-coupled olfactory receptor activity	12	168	0.0714286	0.000502277	0.999809	0.057	1	O44661_CAEEL	O16931_CAEEL	Q9XXP8_CAEEL	O62279_CAEEL	O45284_CAEEL	O45338_CAEEL	O44660_CAEEL	Q966B4_CAEEL	Q7YWZ9_CAEEL	Q9XV82_CAEEL	V5Z1T3_CAEEL	Q17709_CAEEL
biological_process	GO:0031032	actomyosin structure organization	12	14	0.857143	0.999996	1.16627e-05	1	0.005	ROCK_CAEEL	UNC87_CAEEL	H2KYZ6_CAEEL	Q9XVH4_CAEEL	G5EFD6_CAEEL	G5EEG8_CAEEL	Q9GP93_CAEEL	Q21025_CAEEL	G5EBP4_CAEEL	Q95Q79_CAEEL	H2KZV9_CAEEL	G5EEP9_CAEEL
biological_process	GO:0045104	intermediate filament cytoskeleton organization	12	14	0.857143	0.999998	1.56547e-05	1	0.011	A0A1N7SYR7_CAEEL	G5EDD3_CAEEL	A0A1N7SYN9_CAEEL	G5EFD1_CAEEL	A0A1N7SYP3_CAEEL	G5EFW2_CAEEL	G5ECP9_CAEEL	G5ECG8_CAEEL	G5EFK7_CAEEL	A0A1N7SYN7_CAEEL	G5EFM4_CAEEL	G5EEC4_CAEEL
biological_process	GO:0042060	wound healing	12	14	0.857143	1	6.18803e-07	1	0.001	A0A1N7SYR7_CAEEL	G5EDD3_CAEEL	A0A1N7SYN9_CAEEL	G5EFD1_CAEEL	A0A1N7SYP3_CAEEL	G5EFW2_CAEEL	G5ECP9_CAEEL	G5ECG8_CAEEL	G5EFK7_CAEEL	A0A1N7SYN7_CAEEL	G5EFM4_CAEEL	G5EEC4_CAEEL
biological_process	GO:0009653	anatomical structure morphogenesis	11	38	0.289474	1	7.02574e-15	1	0	PHA4_CAEEL	NGN1_CAEEL	SEM2_CAEEL	DAF14_CAEEL	FKH3_CAEEL	FKH4_CAEEL	SOX2_CAEEL	SMA4_CAEEL	NLK_CAEEL	A0A1N7SZG1_CAEEL	Q17922_CAEEL
biological_process	GO:0030421	defecation	11	42	0.261905	0.94164	0.105658	1	1	RIM_CAEEL	GBR1_CAEEL	MADD_CAEEL	SLAP2_CAEEL	SYB1_CAEEL	G5ECM4_CAEEL	G5EG65_CAEEL	G5EGI5_CAEEL	H1ZUX0_CAEEL	H1ZUX1_CAEEL	Q9U208_CAEEL
biological_process	GO:0045892	negative regulation of transcription, DNA-templated	11	58	0.189655	0.996657	0.00554234	1	0.996	FLH3_CAEEL	FLH2_CAEEL	SIR2_CAEEL	RCOR_CAEEL	Q9U203_CAEEL	K8F7U3_CAEEL	Q9XVI2_CAEEL	K8ES81_CAEEL	K8ERR8_CAEEL	Q9U202_CAEEL	K8ESF3_CAEEL
biological_process	GO:0045132	meiotic chromosome segregation	11	38	0.289474	0.965168	0.0568731	1	1	CEP1_CAEEL	NUF2_CAEEL	SZY20_CAEEL	ZHP3_CAEEL	O17724_CAEEL	G5EGQ2_CAEEL	B2D6L4_CAEEL	Q565A8_CAEEL	Q19672_CAEEL	G5EGG3_CAEEL	Q58AA4_CAEEL
biological_process	GO:0030182	neuron differentiation	11	42	0.261905	1	3.33243e-13	1	0	NGN1_CAEEL	CHE1_CAEEL	EGL44_CAEEL	LIM4_CAEEL	SPTF1_CAEEL	NDF1_CAEEL	Q9U2Z0_CAEEL	Q9U2M6_CAEEL	Q7K714_CAEEL	Q0PCD8_CAEEL	P91547_CAEEL
cellular_component	GO:0072686	mitotic spindle	11	26	0.423077	0.999962	0.000144163	1	0.037	SEP1_CAEEL	CDC14_CAEEL	MBK2_CAEEL	2AAA_CAEEL	CLAP3_CAEEL	CLAS2_CAEEL	CLH_CAEEL	G5EFM0_CAEEL	G5ECC0_CAEEL	Q23491_CAEEL	P91400_CAEEL
biological_process	GO:0006486	protein glycosylation	11	84	0.130952	0.0244109	0.986728	1	1	EXT2_CAEEL	MGAT1_CAEEL	BRE2_CAEEL	FUTA_CAEEL	MAN12_CAEEL	G5EGL5_CAEEL	O62165_CAEEL	Q7YXC4_CAEEL	D0Z5N7_CAEEL	O17552_CAEEL	C3JXF0_CAEEL
biological_process	GO:0006397	mRNA processing	11	75	0.146667	0.0156673	0.989775	0.998	1	DHX9_CAEEL	PAXT1_CAEEL	DHX15_CAEEL	SYM2_CAEEL	DHX16_CAEEL	ASD2_CAEEL	GLD2_CAEEL	ADR1_CAEEL	O62235_CAEEL	Q9BLA0_CAEEL	Q9N368_CAEEL
molecular_function	GO:0030276	clathrin binding	11	37	0.297297	0.99998	7.23423e-05	1	0.033	PICAL_CAEEL	CLA1_CAEEL	G5EDJ6_CAEEL	D7SFQ5_CAEEL	A0A486WXP9_CAEEL	Q9N4F3_CAEEL	G5EDP5_CAEEL	Q23056_CAEEL	D7SFQ6_CAEEL	Q8I4L8_CAEEL	G5EFC6_CAEEL
cellular_component	GO:0016459	myosin complex	11	25	0.44	0.999999	5.83848e-06	1	0.002	MLE_CAEEL	MYSP_CAEEL	S6F568_CAEEL	Q21000_CAEEL	W6RY57_CAEEL	Q95ZU1_CAEEL	Q20456_CAEEL	Q9XWR0_CAEEL	G8JY81_CAEEL	Q9TZI9_CAEEL	O62244_CAEEL
cellular_component	GO:0030176	integral component of endoplasmic reticulum membrane	11	72	0.152778	0.624449	0.485672	1	1	H2FLL7_CAEEL	H2FLL6_CAEEL	A3QMC7_CAEEL	Q20904_CAEEL	O62376_CAEEL	Q9U372_CAEEL	Q17400_CAEEL	G5EDI2_CAEEL	H2FLL8_CAEEL	H2FLL9_CAEEL	C0RSI9_CAEEL
molecular_function	GO:0042393	histone binding	11	64	0.171875	0.626597	0.477855	1	1	HSR9_CAEEL	SSL1_CAEEL	LIN49_CAEEL	G5EGI1_CAEEL	P91094_CAEEL	Q9N583_CAEEL	Q95Y84_CAEEL	K8F7U3_CAEEL	K8ES81_CAEEL	K8ERR8_CAEEL	K8ESF3_CAEEL
biological_process	GO:0007049	cell cycle	11	52	0.211538	0.999199	0.00111271	1	0.685	EGL44_CAEEL	ATM_CAEEL	DHX9_CAEEL	NPP5_CAEEL	LMLN_CAEEL	REI2_CAEEL	APR1_CAEEL	U4PEM0_CAEEL	U4PRH0_CAEEL	U4PBE6_CAEEL	U4PM75_CAEEL
biological_process	GO:0000070	mitotic sister chromatid segregation	11	33	0.333333	0.999996	1.09795e-05	1	0.005	SCC3_CAEEL	KLE2_CAEEL	NUF2_CAEEL	SDC3_CAEEL	G5EG83_CAEEL	G5EDA3_CAEEL	Q9N583_CAEEL	Q95Y84_CAEEL	Q9XXT5_CAEEL	O76447_CAEEL	H2KZD5_CAEEL
biological_process	GO:0006606	protein import into nucleus	11	42	0.261905	0.986969	0.0284058	1	1	NU214_CAEEL	NPP5_CAEEL	IMA2_CAEEL	NXT1_CAEEL	NUP98_CAEEL	U4PBW7_CAEEL	Q965V4_CAEEL	Q21436_CAEEL	K8ERU5_CAEEL	L8E808_CAEEL	K8FDZ3_CAEEL
molecular_function	GO:0003730	mRNA 3'-UTR binding	11	69	0.15942	0.580784	0.549742	1	1	MOE3_CAEEL	CPB3_CAEEL	NCL1_CAEEL	GLD1_CAEEL	DAZ1_CAEEL	G5EF15_CAEEL	G5ECB9_CAEEL	Q23191_CAEEL	O02289_CAEEL	Q4JFB7_CAEEL	B9WRT8_CAEEL
biological_process	GO:0050896	response to stimulus	11	14	0.785714	1	2.3013e-07	1	0.001	MBK1_CAEEL	G5EG85_CAEEL	G5EC35_CAEEL	Q9U9J8_CAEEL	S6FN00_CAEEL	A0A486WVF0_CAEEL	E0AHA7_CAEEL	A0A486WUT8_CAEEL	G5EFW3_CAEEL	G5EG97_CAEEL	G5EBH3_CAEEL
cellular_component	GO:0032809	neuronal cell body membrane	11	27	0.407407	0.999857	0.000671935	1	0.183	CAM1_CAEEL	G5ED46_CAEEL	G5EC00_CAEEL	Q8I4L1_CAEEL	Q8I4L4_CAEEL	Q19464_CAEEL	G5EDK3_CAEEL	Q8I4L3_CAEEL	G5ECD2_CAEEL	Q18100_CAEEL	Q8I4L2_CAEEL
molecular_function	GO:0051087	chaperone binding	11	35	0.314286	0.994018	0.01678	1	1	GRPE_CAEEL	ANC1_CAEEL	DVE1_CAEEL	STX1A_CAEEL	UBE4_CAEEL	O61980_CAEEL	Q5TKA9_CAEEL	A0A2C9C3A7_CAEEL	Q9N3E0_CAEEL	A0A2C9C2Z1_CAEEL	Q86S24_CAEEL
biological_process	GO:0045893	positive regulation of transcription, DNA-templated	11	45	0.244444	1	3.55285e-08	1	0	MBK1_CAEEL	EGL44_CAEEL	HMBX1_CAEEL	MYRF1_CAEEL	MYRF2_CAEEL	MED15_CAEEL	X5M5M2_CAEEL	P91019_CAEEL	A0A168H365_CAEEL	Q19818_CAEEL	J7SA49_CAEEL
cellular_component	GO:0005815	microtubule organizing center	11	32	0.34375	0.999989	2.48222e-05	1	0.009	DHX9_CAEEL	OSM3_CAEEL	CLAP3_CAEEL	CLAS2_CAEEL	K0M7B5_CAEEL	G5ECC0_CAEEL	S6FMZ4_CAEEL	S6FCY3_CAEEL	P91400_CAEEL	Q17711_CAEEL	J7S130_CAEEL
biological_process	GO:0051560	mitochondrial calcium ion homeostasis	11	20	0.55	0.999984	0.000107477	1	0.093	A5JYS5_CAEEL	X5LXA1_CAEEL	A0A486WX00_CAEEL	Q5WRP6_CAEEL	Q7JM28_CAEEL	A0A486WXK7_CAEEL	A0A486WTK6_CAEEL	A0A486WWK3_CAEEL	X5LQ14_CAEEL	A0A486WVD0_CAEEL	Q18798_CAEEL
cellular_component	GO:0019898	extrinsic component of membrane	11	23	0.478261	0.999933	0.00014349	1	0.037	ATG2_CAEEL	Q7KPP4_CAEEL	O61528_CAEEL	Q7JNG4_CAEEL	Q7JNG6_CAEEL	Q22342_CAEEL	C4ALD5_CAEEL	H2KYM2_CAEEL	H2KYM4_CAEEL	H2KYM3_CAEEL	Q95Q51_CAEEL
biological_process	GO:0045732	positive regulation of protein catabolic process	11	19	0.578947	0.759958	0.339365	1	1	MBK2_CAEEL	SMA4_CAEEL	APR1_CAEEL	Q9GUP2_CAEEL	U4PBY0_CAEEL	U4PES6_CAEEL	U4PRN6_CAEEL	U4PBX5_CAEEL	U4PBJ5_CAEEL	U4PBK1_CAEEL	U4PMD1_CAEEL
biological_process	GO:0048644	muscle organ morphogenesis	11	14	0.785714	1	6.24786e-07	1	0.001	UNC52_CAEEL	GON1_CAEEL	G5ECJ4_CAEEL	G5EEI5_CAEEL	H9G348_CAEEL	H9G351_CAEEL	H9G354_CAEEL	H9G352_CAEEL	H9G353_CAEEL	H9G349_CAEEL	H9G350_CAEEL
cellular_component	GO:0001725	stress fiber	11	15	0.733333	1	3.65771e-07	1	0	UNC87_CAEEL	ZYX_CAEEL	Q8MNT0_CAEEL	G5EEL1_CAEEL	Q95QI3_CAEEL	G5EFG1_CAEEL	G5EFL5_CAEEL	G5EC72_CAEEL	H2KYW1_CAEEL	Q95QI2_CAEEL	G5EEF6_CAEEL
biological_process	GO:1990456	mitochondrion-endoplasmic reticulum membrane tethering	11	11	1	1	2.81992e-09	1	0	A5JYS5_CAEEL	X5LXA1_CAEEL	A0A486WX00_CAEEL	Q5WRP6_CAEEL	Q7JM28_CAEEL	A0A486WXK7_CAEEL	A0A486WTK6_CAEEL	A0A486WWK3_CAEEL	X5LQ14_CAEEL	A0A486WVD0_CAEEL	Q18798_CAEEL
biological_process	GO:0050830	defense response to Gram-positive bacterium	10	75	0.133333	0.268942	0.827653	1	1	LGG2_CAEEL	FOXO_CAEEL	HSF1_CAEEL	KRAF1_CAEEL	PLCE1_CAEEL	VPP1_CAEEL	A16L2_CAEEL	Q17645_CAEEL	Q93198_CAEEL	Q9N3W9_CAEEL
cellular_component	GO:0009986	cell surface	10	112	0.0892857	0.0740465	0.954489	1	1	PLX2_CAEEL	PAT2_CAEEL	WRT4_CAEEL	EAT20_CAEEL	G5ED46_CAEEL	Q18469_CAEEL	G5ECV3_CAEEL	S6EZQ4_CAEEL	S6FN15_CAEEL	S6FWQ0_CAEEL
molecular_function	GO:0042803	protein homodimerization activity	10	43	0.232558	0.930212	0.135503	1	1	GRPE_CAEEL	HLH2_CAEEL	CEP1_CAEEL	GOGA5_CAEEL	SYG2_CAEEL	BL1S6_CAEEL	MYOD1_CAEEL	G5EGS8_CAEEL	Q9XXI6_CAEEL	Q9XXI5_CAEEL
biological_process	GO:0008360	regulation of cell shape	10	21	0.47619	0.999826	0.000831601	1	0.636	PLX2_CAEEL	RAC1_CAEEL	FOZI1_CAEEL	ROCK_CAEEL	G5EBK3_CAEEL	G5EES2_CAEEL	U4PF39_CAEEL	U4PRY7_CAEEL	Q3V5K0_CAEEL	U4PBW0_CAEEL
cellular_component	GO:0030496	midbody	10	28	0.357143	0.998642	0.00498575	1	0.806	SEP1_CAEEL	CDC14_CAEEL	ANI1_CAEEL	G5EC43_CAEEL	G5EG83_CAEEL	Q23542_CAEEL	Q8MQ04_CAEEL	E2JKY8_CAEEL	Q8MQ03_CAEEL	E2JKZ0_CAEEL
cellular_component	GO:0051233	spindle midzone	10	24	0.416667	0.998642	0.00498575	1	0.806	CDC14_CAEEL	CLAS2_CAEEL	G5EC43_CAEEL	G5EG83_CAEEL	Q23542_CAEEL	Q8MQ04_CAEEL	O17666_CAEEL	E2JKY8_CAEEL	Q8MQ03_CAEEL	E2JKZ0_CAEEL
biological_process	GO:0006888	endoplasmic reticulum to Golgi vesicle-mediated transport	10	63	0.15873	0.962507	0.0670333	1	1	COPE_CAEEL	GON1_CAEEL	Q20913_CAEEL	Q2EEM5_CAEEL	H2L043_CAEEL	H2L2A7_CAEEL	D0Z5P0_CAEEL	Q2PJ77_CAEEL	Q9BI63_CAEEL	G5EGG0_CAEEL
biological_process	GO:0012501	programmed cell death	10	41	0.243902	0.926177	0.101423	1	1	SH3GH_CAEEL	HSF1_CAEEL	CED2_CAEEL	CED7_CAEEL	CED8_CAEEL	G5EDU4_CAEEL	G5EE70_CAEEL	G5EGI1_CAEEL	Q9U370_CAEEL	C0P274_CAEEL
biological_process	GO:0007271	synaptic transmission, cholinergic	10	34	0.294118	0.947094	0.0934925	1	1	RIM_CAEEL	DMD_CAEEL	STX1A_CAEEL	VPP1_CAEEL	SYB1_CAEEL	ACM1_CAEEL	G5EDQ4_CAEEL	G5EDV5_CAEEL	G5EGA4_CAEEL	G5EF89_CAEEL
biological_process	GO:0000398	mRNA splicing, via spliceosome	10	109	0.0917431	0.0557514	0.963577	1	1	NH2L1_CAEEL	CWC22_CAEEL	GPKOW_CAEEL	G5ED26_CAEEL	Q9GYS7_CAEEL	Q21323_CAEEL	U4PBX2_CAEEL	H2KAQ0_CAEEL	Q9BIC2_CAEEL	Q93339_CAEEL
cellular_component	GO:1990904	ribonucleoprotein complex	10	66	0.151515	0.000971139	0.99941	0.088	1	DHX9_CAEEL	CGH1_CAEEL	SYM2_CAEEL	ASD2_CAEEL	Q8MXR2_CAEEL	D4YW53_CAEEL	H2KZN0_CAEEL	Q9U304_CAEEL	Q93194_CAEEL	Q9BIB7_CAEEL
molecular_function	GO:0000149	SNARE binding	10	43	0.232558	0.90013	0.16302	1	1	GOSR2_CAEEL	PICAL_CAEEL	STX1A_CAEEL	CLA1_CAEEL	Q23368_CAEEL	G5EDP5_CAEEL	Q23056_CAEEL	Q8I4L8_CAEEL	G5EFC6_CAEEL	O45812_CAEEL
molecular_function	GO:0061629	RNA polymerase II-specific DNA-binding transcription factor binding	10	38	0.263158	0.967494	0.0697882	1	1	PER_CAEEL	HCF1_CAEEL	GLP1_CAEEL	EGL44_CAEEL	EGL27_CAEEL	YAP1_CAEEL	GEI17_CAEEL	Q9XVI2_CAEEL	Q95ZN3_CAEEL	Q7JNM3_CAEEL
molecular_function	GO:0008092	cytoskeletal protein binding	10	21	0.47619	1	2.32046e-42	1	0	PTP1_CAEEL	MYSP_CAEEL	AJM1_CAEEL	Q23542_CAEEL	H2KYC5_CAEEL	E2JKY8_CAEEL	Q9GP93_CAEEL	Q95ZY7_CAEEL	E2JKZ0_CAEEL	H2KZV9_CAEEL
biological_process	GO:0007059	chromosome segregation	10	36	0.277778	0.999981	3.5966e-05	1	0.035	NPP5_CAEEL	SMC1_CAEEL	TLK1_CAEEL	KNL2_CAEEL	ATX2_CAEEL	G5ECC0_CAEEL	Q23542_CAEEL	E2JKY8_CAEEL	E2JKZ0_CAEEL	P91400_CAEEL
molecular_function	GO:0003725	double-stranded RNA binding	10	27	0.37037	0.999285	0.00256839	1	0.66	SEA2_CAEEL	DHX9_CAEEL	RLE1_CAEEL	RM44_CAEEL	ADR1_CAEEL	G5EES3_CAEEL	Q94239_CAEEL	U4PEM4_CAEEL	U4PRH5_CAEEL	A0A486WUJ5_CAEEL
molecular_function	GO:0022857	transmembrane transporter activity	10	230	0.0434783	0.000226183	0.999834	0.024	1	CED7_CAEEL	H2FLL7_CAEEL	H2FLL6_CAEEL	Q9NEI8_CAEEL	A0A3B1E616_CAEEL	O62376_CAEEL	Q19845_CAEEL	Q9U372_CAEEL	H2FLL8_CAEEL	H2FLL9_CAEEL
biological_process	GO:0006974	cellular response to DNA damage stimulus	10	32	0.3125	0.957492	0.0584276	1	1	TNKS1_CAEEL	FOXO_CAEEL	PARG1_CAEEL	HDA4_CAEEL	BARD1_CAEEL	GEI17_CAEEL	G5EDT9_CAEEL	Q20129_CAEEL	H2L0J8_CAEEL	G5EBZ1_CAEEL
biological_process	GO:0046716	muscle cell cellular homeostasis	10	28	0.357143	0.996258	0.012063	1	1	DMD_CAEEL	PAT2_CAEEL	UNC52_CAEEL	DYC1_CAEEL	G5EG85_CAEEL	Q9U9J8_CAEEL	E0AHA7_CAEEL	V6CLV8_CAEEL	V6CLR8_CAEEL	V6CJD7_CAEEL
molecular_function	GO:0050660	flavin adenine dinucleotide binding	10	72	0.138889	0.31116	0.780589	1	1	KMO_CAEEL	ACX14_CAEEL	ACX15_CAEEL	ACX12_CAEEL	ACX13_CAEEL	Q9XXU5_CAEEL	Q7JLJ0_CAEEL	B5BM30_CAEEL	Q8I4K2_CAEEL	Q21794_CAEEL
cellular_component	GO:0032590	dendrite membrane	10	18	0.555556	0.999994	4.81707e-05	1	0.013	DEX1_CAEEL	G5EC00_CAEEL	Q8I4L1_CAEEL	Q8I4L4_CAEEL	Q19464_CAEEL	G5EDK3_CAEEL	Q8I4L3_CAEEL	G5ECD2_CAEEL	Q18100_CAEEL	Q8I4L2_CAEEL
biological_process	GO:0051260	protein homooligomerization	10	87	0.114943	0.155716	0.906566	1	1	Q9BMU4_CAEEL	G5EC00_CAEEL	Q8I4L1_CAEEL	Q8I4L4_CAEEL	Q19464_CAEEL	Q688Z6_CAEEL	G5EDK3_CAEEL	Q8I4L3_CAEEL	G5ECD2_CAEEL	Q8I4L2_CAEEL
biological_process	GO:0060271	cilium assembly	10	77	0.12987	0.346749	0.748362	1	1	DYHC2_CAEEL	DAF11_CAEEL	CDC14_CAEEL	DYF2_CAEEL	OSM3_CAEEL	PTHB1_CAEEL	IF122_CAEEL	ARL6_CAEEL	CLUA1_CAEEL	G5ED37_CAEEL
cellular_component	GO:0010008	endosome membrane	10	35	0.285714	0.868649	0.191342	1	1	VPS53_CAEEL	G5ED98_CAEEL	O16637_CAEEL	O44158_CAEEL	Q17687_CAEEL	Q22368_CAEEL	Q17796_CAEEL	Q95X88_CAEEL	Q9TXI3_CAEEL	O45812_CAEEL
molecular_function	GO:0003824	catalytic activity	10	67	0.149254	1.01828e-12	1	0	1	DCXR_CAEEL	DIG1_CAEEL	A0A679L8M9_CAEEL	Q9NAL5_CAEEL	Q9N4F1_CAEEL	H2L041_CAEEL	A8WFH5_CAEEL	B5BM33_CAEEL	E1B6U2_CAEEL	A0A4V0IK15_CAEEL
biological_process	GO:0008543	fibroblast growth factor receptor signaling pathway	10	14	0.714286	0.999987	0.000104774	1	0.089	UNC52_CAEEL	LE756_CAEEL	G5EEI5_CAEEL	H9G348_CAEEL	H9G351_CAEEL	H9G354_CAEEL	H9G352_CAEEL	H9G353_CAEEL	H9G349_CAEEL	H9G350_CAEEL
biological_process	GO:0006633	fatty acid biosynthetic process	10	22	0.454545	0.882351	0.193948	1	1	ACS7_CAEEL	ODBA_CAEEL	Q19246_CAEEL	Q9GZI3_CAEEL	Q9XUC3_CAEEL	Q7KQ29_CAEEL	A0A1C3NSM6_CAEEL	Q18559_CAEEL	H2L0M0_CAEEL	C1P655_CAEEL
molecular_function	GO:0004435	phosphatidylinositol phospholipase C activity	10	37	0.27027	0.97457	0.059174	1	1	PLCE1_CAEEL	G5EFG8_CAEEL	A0A4V0IN51_CAEEL	Q8IA75_CAEEL	A0A4V0IK11_CAEEL	A0A4V6M3C0_CAEEL	A0A4V0IKD8_CAEEL	A0A4V0IJW2_CAEEL	A0A4V0IMY5_CAEEL	Q8IA76_CAEEL
biological_process	GO:0048808	male genitalia morphogenesis	10	10	1	0.999998	1.10775e-05	1	0.005	LIN29_CAEEL	Q7KPP4_CAEEL	O61528_CAEEL	Q7JNG4_CAEEL	Q7JNG6_CAEEL	C4ALD5_CAEEL	H2KYM2_CAEEL	H2KYM4_CAEEL	H2KYM3_CAEEL	Q95Q51_CAEEL
molecular_function	GO:0017124	SH3 domain binding	10	17	0.588235	0.999992	6.78389e-05	1	0.029	MYSP_CAEEL	G5EG53_CAEEL	Q19019_CAEEL	G5EEN3_CAEEL	A0A0K3AYC9_CAEEL	Q95ZR5_CAEEL	Q17687_CAEEL	A0A0K3AW41_CAEEL	A0A0K3AT36_CAEEL	H2L0C7_CAEEL
biological_process	GO:0007154	cell communication	10	30	0.333333	1	4.06849e-10	1	0	G5EG85_CAEEL	G5EC35_CAEEL	Q9U9J8_CAEEL	S6FN00_CAEEL	A0A486WVF0_CAEEL	E0AHA7_CAEEL	A0A486WUT8_CAEEL	G5EFW3_CAEEL	G5EG97_CAEEL	G5EBH3_CAEEL
cellular_component	GO:0005964	phosphorylase kinase complex	10	14	0.714286	1	1.90419e-06	1	0	U4PS34_CAEEL	U4PF78_CAEEL	U4PCE2_CAEEL	U4PMS5_CAEEL	U4PC02_CAEEL	H2L0I6_CAEEL	U4PCD4_CAEEL	U4PC07_CAEEL	U4PF86_CAEEL	H2L0I5_CAEEL
biological_process	GO:0051693	actin filament capping	10	12	0.833333	0.999997	1.5845e-05	1	0.012	G5EG85_CAEEL	G5EC35_CAEEL	Q9U9J8_CAEEL	S6FN00_CAEEL	A0A486WVF0_CAEEL	E0AHA7_CAEEL	A0A486WUT8_CAEEL	G5EFW3_CAEEL	G5EG97_CAEEL	G5EBH3_CAEEL
biological_process	GO:0023052	signaling	10	15	0.666667	1	1.03393e-10	1	0	G5EG85_CAEEL	G5EC35_CAEEL	Q9U9J8_CAEEL	S6FN00_CAEEL	A0A486WVF0_CAEEL	E0AHA7_CAEEL	A0A486WUT8_CAEEL	G5EFW3_CAEEL	G5EG97_CAEEL	G5EBH3_CAEEL
biological_process	GO:0043051	regulation of pharyngeal pumping	9	58	0.155172	0.742907	0.367105	1	1	RIM_CAEEL	LIPB_CAEEL	NFI1_CAEEL	UNC13_CAEEL	SULU_CAEEL	SYB1_CAEEL	ACM3_CAEEL	Q95Q96_CAEEL	G5EDN9_CAEEL
biological_process	GO:0007281	germ cell development	9	50	0.18	0.999653	0.000633288	1	0.429	MOG5_CAEEL	MES2_CAEEL	CCNE_CAEEL	DHX9_CAEEL	YQ53_CAEEL	DHX16_CAEEL	G5EBQ3_CAEEL	Q94239_CAEEL	Q22308_CAEEL
biological_process	GO:0000278	mitotic cell cycle	9	60	0.15	0.999437	0.000866031	1	0.642	PLK3_CAEEL	DYHC_CAEEL	ZYG1_CAEEL	O61208_CAEEL	G5EDA3_CAEEL	Q8ITY3_CAEEL	O17666_CAEEL	O62218_CAEEL	Q19520_CAEEL
biological_process	GO:0040038	polar body extrusion after meiotic divisions	9	25	0.36	0.995153	0.0160257	1	1	SEP1_CAEEL	CDC14_CAEEL	KLC_CAEEL	ANI1_CAEEL	ATX2_CAEEL	G5EC43_CAEEL	G5EG83_CAEEL	Q8MQ04_CAEEL	Q8MQ03_CAEEL
biological_process	GO:0000045	autophagosome assembly	9	31	0.290323	0.944447	0.106279	1	1	LGG2_CAEEL	ATG2_CAEEL	A16L2_CAEEL	H1UBJ1_CAEEL	A4UZ34_CAEEL	Q22342_CAEEL	A0A3P6NNZ8_CAEEL	A0A3P6MYF5_CAEEL	Q9XWQ4_CAEEL
cellular_component	GO:0070971	endoplasmic reticulum exit site	9	16	0.5625	0.999988	0.000103034	1	0.032	GBF1_CAEEL	A0A4V0IKA6_CAEEL	Q23368_CAEEL	Q95ZV3_CAEEL	G5EFY6_CAEEL	A0A4V0IM30_CAEEL	A0A4V0IKE4_CAEEL	H2KZQ8_CAEEL	H2KZQ9_CAEEL
cellular_component	GO:0012507	ER to Golgi transport vesicle membrane	9	16	0.5625	0.999989	7.20342e-05	1	0.023	GOSR2_CAEEL	Q2EEM5_CAEEL	A0A4V0IKA6_CAEEL	Q95ZV3_CAEEL	A0A4V0IM30_CAEEL	A0A4V0IKE4_CAEEL	H2KZQ8_CAEEL	G5EGG0_CAEEL	H2KZQ9_CAEEL
biological_process	GO:0009949	polarity specification of anterior/posterior axis	9	21	0.428571	0.999006	0.00433345	1	0.985	SEP1_CAEEL	APC1_CAEEL	CDC27_CAEEL	PAR3_CAEEL	PAR1_CAEEL	NLK_CAEEL	Q9GZI3_CAEEL	Q7KQ29_CAEEL	H2L0M0_CAEEL
biological_process	GO:0016485	protein processing	9	50	0.18	0.450833	0.653251	1	1	SEP1_CAEEL	BLI4_CAEEL	CBPE_CAEEL	B6VQ96_CAEEL	Q86MG1_CAEEL	H2KYL1_CAEEL	H2KYL2_CAEEL	Q22763_CAEEL	O45569_CAEEL
molecular_function	GO:0005544	calcium-dependent phospholipid binding	9	34	0.264706	0.965262	0.0799118	1	1	CPNA5_CAEEL	CLA1_CAEEL	G5EDP5_CAEEL	Q23056_CAEEL	Q27512_CAEEL	Q7JMT5_CAEEL	Q8I4L8_CAEEL	G5EFC6_CAEEL	Q22422_CAEEL
cellular_component	GO:0031462	Cul2-RING ubiquitin ligase complex	9	36	0.25	0.975048	0.0603373	1	1	GADR3_CAEEL	CUL2_CAEEL	ZER1_CAEEL	G3DRG2_CAEEL	Q9XTS0_CAEEL	H2KMM0_CAEEL	Q21875_CAEEL	Q2EEN7_CAEEL	O02227_CAEEL
biological_process	GO:0006915	apoptotic process	9	49	0.183673	0.74408	0.326234	1	1	RAC1_CAEEL	MADD_CAEEL	DRE1_CAEEL	CGH1_CAEEL	CED2_CAEEL	HDA4_CAEEL	IASPP_CAEEL	Q18965_CAEEL	Q60F73_CAEEL
biological_process	GO:0033563	dorsal/ventral axon guidance	9	33	0.272727	0.985663	0.0353371	1	1	RAC1_CAEEL	RPM1_CAEEL	RIG6_CAEEL	G5ECZ1_CAEEL	G5EG53_CAEEL	G5EBV3_CAEEL	Q17490_CAEEL	H2L0C7_CAEEL	Q8MQG0_CAEEL
biological_process	GO:0042659	regulation of cell fate specification	9	35	0.257143	0.967823	0.0596828	1	1	LI15B_CAEEL	EGL43_CAEEL	MED29_CAEEL	LI15A_CAEEL	G5EGS7_CAEEL	G5EDL0_CAEEL	Q17740_CAEEL	G5EES3_CAEEL	Q21295_CAEEL
biological_process	GO:0035725	sodium ion transmembrane transport	9	58	0.155172	0.466817	0.649125	1	1	SNF5_CAEEL	UN105_CAEEL	DEG1_CAEEL	G5EF43_CAEEL	G5EGI5_CAEEL	O44752_CAEEL	O01664_CAEEL	P91102_CAEEL	O45402_CAEEL
molecular_function	GO:0008013	beta-catenin binding	9	18	0.5	0.999869	0.000798351	1	0.329	RSA2_CAEEL	HMR1_CAEEL	FOXO_CAEEL	HMP1_CAEEL	NLK_CAEEL	APR1_CAEEL	D3YT29_CAEEL	A5JYX3_CAEEL	A0A1I6CM53_CAEEL
biological_process	GO:0033674	positive regulation of kinase activity	9	43	0.209302	0.997982	0.00457675	1	0.985	DDRB_CAEEL	CAM1_CAEEL	DDRA_CAEEL	YS3J_CAEEL	VAB1_CAEEL	Q10915_CAEEL	F3NWW5_CAEEL	H2KZN4_CAEEL	H2KZN3_CAEEL
biological_process	GO:0016055	Wnt signaling pathway	9	46	0.195652	0.467997	0.640594	1	1	CAM1_CAEEL	KC1G_CAEEL	EGL27_CAEEL	NLK_CAEEL	G5EGD8_CAEEL	G5EDU4_CAEEL	G5EE70_CAEEL	Q23566_CAEEL	A0A1I6CM53_CAEEL
cellular_component	GO:0005643	nuclear pore	9	40	0.225	0.972831	0.0574879	1	1	NU214_CAEEL	NPP5_CAEEL	IMA2_CAEEL	NUP98_CAEEL	Q18476_CAEEL	A0A486WX27_CAEEL	Q5WRT8_CAEEL	A0A486WY01_CAEEL	Q5WRT9_CAEEL
cellular_component	GO:0031965	nuclear membrane	9	29	0.310345	0.994283	0.0135893	1	0.983	TM201_CAEEL	NU214_CAEEL	NPP5_CAEEL	TTN1_CAEEL	UBE4_CAEEL	NUP98_CAEEL	MACO1_CAEEL	G5EFM0_CAEEL	G5EGI5_CAEEL
molecular_function	GO:0044325	transmembrane transporter binding	9	13	0.692308	0.999998	2.51543e-05	1	0.011	RIM_CAEEL	KCC2D_CAEEL	O18302_CAEEL	Q564T0_CAEEL	F5GUA8_CAEEL	G5EDZ5_CAEEL	A5JYY2_CAEEL	F5GUA9_CAEEL	E7EM33_CAEEL
molecular_function	GO:0005249	voltage-gated potassium channel activity	9	61	0.147541	0.196751	0.880241	1	1	CNG_CAEEL	G5EC00_CAEEL	Q8I4L1_CAEEL	Q8I4L4_CAEEL	Q19464_CAEEL	G5EDK3_CAEEL	Q8I4L3_CAEEL	G5ECD2_CAEEL	Q8I4L2_CAEEL
biological_process	GO:0048666	neuron development	9	26	0.346154	1	3.59912e-11	1	0	BUB1_CAEEL	HLH2_CAEEL	ZTF11_CAEEL	ATAT1_CAEEL	G5EG85_CAEEL	Q9U9J8_CAEEL	G5ECJ4_CAEEL	S6FN00_CAEEL	E0AHA7_CAEEL
biological_process	GO:0034765	regulation of ion transmembrane transport	9	91	0.0989011	0.00282008	0.998894	0.651	1	CLHM1_CAEEL	G5EC00_CAEEL	Q8I4L1_CAEEL	Q8I4L4_CAEEL	Q19464_CAEEL	G5EDK3_CAEEL	Q8I4L3_CAEEL	G5ECD2_CAEEL	Q8I4L2_CAEEL
molecular_function	GO:0004714	transmembrane receptor protein tyrosine kinase activity	9	51	0.176471	0.667524	0.47425	1	1	DDRB_CAEEL	CAM1_CAEEL	DDRA_CAEEL	SCD2_CAEEL	YS3J_CAEEL	VAB1_CAEEL	F3NWW5_CAEEL	H2KZN4_CAEEL	H2KZN3_CAEEL
cellular_component	GO:0090575	RNA polymerase II transcription regulator complex	9	28	0.321429	0.993973	0.0119535	1	0.976	GLP1_CAEEL	HLH2_CAEEL	EGL44_CAEEL	MXL3_CAEEL	YAP1_CAEEL	HLH6_CAEEL	EFL3_CAEEL	G5EFL9_CAEEL	Q9N2W3_CAEEL
biological_process	GO:0042594	response to starvation	9	39	0.230769	0.905645	0.144448	1	1	FOXO_CAEEL	CEP1_CAEEL	PLA2_CAEEL	A0A486WY26_CAEEL	H2KY88_CAEEL	A0A3P6NNZ8_CAEEL	A0A3P6MYF5_CAEEL	Q8MQ22_CAEEL	A0A486WX46_CAEEL
cellular_component	GO:0030286	dynein complex	9	17	0.529412	0.999957	0.000217748	1	0.05	DYHC2_CAEEL	DYHC_CAEEL	Q23542_CAEEL	A0A163VTS9_CAEEL	G5EDV4_CAEEL	Q9XWA8_CAEEL	E2JKZ0_CAEEL	L8EC32_CAEEL	L8E938_CAEEL
biological_process	GO:1905515	non-motile cilium assembly	9	36	0.25	0.949478	0.104549	1	1	DYHC2_CAEEL	BBS1_CAEEL	DYF2_CAEEL	OSM3_CAEEL	NPHP1_CAEEL	IF122_CAEEL	G5ED37_CAEEL	Q21303_CAEEL	A2A266_CAEEL
molecular_function	GO:0017056	structural constituent of nuclear pore	9	24	0.375	0.997659	0.00869894	1	0.992	NU214_CAEEL	NPP5_CAEEL	NUP98_CAEEL	A0A486WX27_CAEEL	Q21295_CAEEL	Q21436_CAEEL	Q5WRT8_CAEEL	A0A486WY01_CAEEL	Q5WRT9_CAEEL
cellular_component	GO:0045177	apical part of cell	9	23	0.391304	0.999829	0.000388402	1	0.09	LET4_CAEEL	PAR3_CAEEL	G5ECM5_CAEEL	G5EBK3_CAEEL	G5EES2_CAEEL	H2KYX2_CAEEL	G5EC72_CAEEL	Q5LK46_CAEEL	H2KYX3_CAEEL
biological_process	GO:0032483	regulation of Rab protein signal transduction	9	9	1	1	1.01491e-07	1	0	MADD_CAEEL	U4PRB3_CAEEL	U4PB89_CAEEL	U4PEG5_CAEEL	U4PRB8_CAEEL	U4PM26_CAEEL	U4PB94_CAEEL	U4PEG9_CAEEL	U4PBM1_CAEEL
biological_process	GO:0030433	ubiquitin-dependent ERAD pathway	9	39	0.230769	0.828889	0.285988	1	1	ENPL1_CAEEL	UBXN4_CAEEL	UBE4_CAEEL	UBQL_CAEEL	YKA4_CAEEL	YO25_CAEEL	Q09396_CAEEL	Q21746_CAEEL	Q9NF22_CAEEL
molecular_function	GO:0004879	nuclear receptor activity	9	70	0.128571	0.303897	0.80491	1	1	NHR23_CAEEL	NHR2_CAEEL	NHR34_CAEEL	NHR41_CAEEL	NHR7_CAEEL	NHR85_CAEEL	NHR8_CAEEL	Q9N2W3_CAEEL	Q9BKZ8_CAEEL
cellular_component	GO:0009925	basal plasma membrane	9	19	0.473684	0.866727	0.206857	1	1	CPNA1_CAEEL	G5EDD3_CAEEL	G5EFD1_CAEEL	G5EFW2_CAEEL	G5ECP9_CAEEL	G5ECG8_CAEEL	G5EFK7_CAEEL	G5EFM4_CAEEL	G5EEC4_CAEEL
molecular_function	GO:0005201	extracellular matrix structural constituent	9	34	0.264706	0.965262	0.0799118	1	1	EPI1_CAEEL	UNC52_CAEEL	CO4A1_CAEEL	FBLN1_CAEEL	G5EDQ4_CAEEL	G5EDV5_CAEEL	G5EGA4_CAEEL	G5EF89_CAEEL	Q9NAQ4_CAEEL
molecular_function	GO:0019825	oxygen binding	9	56	0.160714	0.463576	0.672576	1	1	GLOB9_CAEEL	GCY35_CAEEL	A0A0K3ATU3_CAEEL	Q17884_CAEEL	Q966A3_CAEEL	Q23117_CAEEL	A0A0K3AU27_CAEEL	A0A3B1E4T2_CAEEL	A0A3B1E9Z1_CAEEL
cellular_component	GO:0031674	I band	9	13	0.692308	1	1.33091e-12	1	0	UNC87_CAEEL	TTN1_CAEEL	G5EG85_CAEEL	Q9U9J8_CAEEL	B7WN66_CAEEL	Q94279_CAEEL	E0AHA7_CAEEL	I2HAA7_CAEEL	I2HAA6_CAEEL
molecular_function	GO:0005200	structural constituent of cytoskeleton	9	31	0.290323	0.981612	0.0475765	1	1	VINC_CAEEL	G5EG85_CAEEL	G5EGK1_CAEEL	Q9U9J8_CAEEL	A0A0K3AQU9_CAEEL	S6FN00_CAEEL	A0A0K3ATT6_CAEEL	E0AHA7_CAEEL	Q95XN3_CAEEL
biological_process	GO:0030838	positive regulation of actin filament polymerization	9	16	0.5625	0.99778	0.00688679	1	0.996	Q7KPP4_CAEEL	O61528_CAEEL	Q7JNG4_CAEEL	Q7JNG6_CAEEL	C4ALD5_CAEEL	H2KYM2_CAEEL	H2KYM4_CAEEL	H2KYM3_CAEEL	Q95Q51_CAEEL
cellular_component	GO:0036194	muscle cell projection	9	9	1	1	9.75162e-07	1	0	Q7KPP4_CAEEL	O61528_CAEEL	Q7JNG4_CAEEL	Q7JNG6_CAEEL	C4ALD5_CAEEL	H2KYM2_CAEEL	H2KYM4_CAEEL	H2KYM3_CAEEL	Q95Q51_CAEEL
biological_process	GO:0035022	positive regulation of Rac protein signal transduction	9	9	1	1	1.01491e-07	1	0	Q7KPP4_CAEEL	O61528_CAEEL	Q7JNG4_CAEEL	Q7JNG6_CAEEL	C4ALD5_CAEEL	H2KYM2_CAEEL	H2KYM4_CAEEL	H2KYM3_CAEEL	Q95Q51_CAEEL
biological_process	GO:0016601	Rac protein signal transduction	9	9	1	1	5.16457e-12	1	0	Q7KPP4_CAEEL	O61528_CAEEL	Q7JNG4_CAEEL	Q7JNG6_CAEEL	C4ALD5_CAEEL	H2KYM2_CAEEL	H2KYM4_CAEEL	H2KYM3_CAEEL	Q95Q51_CAEEL
biological_process	GO:0043062	extracellular structure organization	9	10	0.9	0.999999	1.75827e-06	1	0.001	Q5ZR40_CAEEL	A5A8R1_CAEEL	Q5ZR41_CAEEL	Q5ZR42_CAEEL	H2KZ68_CAEEL	Q5ZR35_CAEEL	Q5ZR39_CAEEL	H2KZ67_CAEEL	Q5ZR36_CAEEL
cellular_component	GO:0005743	mitochondrial inner membrane	8	91	0.0879121	5.5874e-06	0.999998	0.001	1	FOLC_CAEEL	MFRN_CAEEL	TIM9_CAEEL	GUF1_CAEEL	G4SRS5_CAEEL	Q18965_CAEEL	P91270_CAEEL	A0A061ACG9_CAEEL
biological_process	GO:0006979	response to oxidative stress	8	73	0.109589	0.0181352	0.990203	1	1	FOXO_CAEEL	HCF1_CAEEL	LRK1_CAEEL	CEP1_CAEEL	SKN1_CAEEL	OSG1_CAEEL	RT4I1_CAEEL	O17241_CAEEL
molecular_function	GO:0005506	iron ion binding	8	129	0.0620155	0.00023883	0.999928	0.025	1	GAD3_CAEEL	Q9N4Q5_CAEEL	A0A0M9JJ78_CAEEL	A0A0K3AUW1_CAEEL	O16671_CAEEL	A0A0M7RF98_CAEEL	O61198_CAEEL	O17892_CAEEL
cellular_component	GO:0005741	mitochondrial outer membrane	8	30	0.266667	0.881606	0.219427	1	1	VDAC_CAEEL	KMO_CAEEL	MSP1_CAEEL	DCA11_CAEEL	A0A4V6M500_CAEEL	B5BM30_CAEEL	Q9U2J0_CAEEL	Q21794_CAEEL
molecular_function	GO:0003714	transcription corepressor activity	8	55	0.145455	0.478383	0.666881	1	1	SIR2_CAEEL	SMA9_CAEEL	EGL27_CAEEL	RCOR_CAEEL	HDA4_CAEEL	HLH10_CAEEL	G5EF15_CAEEL	Q18605_CAEEL
cellular_component	GO:0005759	mitochondrial matrix	8	75	0.106667	0.114153	0.926616	1	1	FUMH_CAEEL	EFTS_CAEEL	FOLC_CAEEL	CRI3_CAEEL	MUTA_CAEEL	GUF1_CAEEL	Q65XY4_CAEEL	G5EDD9_CAEEL
biological_process	GO:0040014	regulation of multicellular organism growth	8	34	0.235294	0.993994	0.0112759	1	1	DAF11_CAEEL	EGL4_CAEEL	STX1A_CAEEL	RT4I1_CAEEL	TIM9_CAEEL	MED15_CAEEL	GCY12_CAEEL	Q18965_CAEEL
biological_process	GO:0043087	regulation of GTPase activity	8	19	0.421053	0.983398	0.0282586	1	1	PLX2_CAEEL	GAP2_CAEEL	PAC1_CAEEL	TG325_CAEEL	U4PF39_CAEEL	U4PRY7_CAEEL	Q3V5K0_CAEEL	U4PBW0_CAEEL
biological_process	GO:0040039	inductive cell migration	8	23	0.347826	0.991219	0.0280643	1	1	MIG5_CAEEL	G5EDQ4_CAEEL	G5EDV5_CAEEL	H1ZUX0_CAEEL	G5EGA4_CAEEL	Q21430_CAEEL	G5EF89_CAEEL	H1ZUX1_CAEEL
cellular_component	GO:0005768	endosome	8	58	0.137931	0.527669	0.546449	1	1	PAD1_CAEEL	VPS18_CAEEL	BL1S6_CAEEL	H8ESG1_CAEEL	Q19833_CAEEL	Q09989_CAEEL	Q6AHQ8_CAEEL	O45812_CAEEL
biological_process	GO:0042395	ecdysis, collagen and cuticulin-based cuticle	8	18	0.444444	0.998844	0.00544567	1	0.996	LRP_CAEEL	NAS37_CAEEL	MYRF1_CAEEL	MMPB_CAEEL	Q9U3A6_CAEEL	Q8I4H0_CAEEL	Q8I4G9_CAEEL	A5JYR4_CAEEL
biological_process	GO:0006412	translation	8	127	0.0629921	0.00353648	0.99771	0.767	1	RM03_CAEEL	SYNC_CAEEL	GUF1_CAEEL	Q9N4L5_CAEEL	Q564V6_CAEEL	O61818_CAEEL	P91862_CAEEL	P90922_CAEEL
cellular_component	GO:0032154	cleavage furrow	8	27	0.296296	0.990278	0.0297186	1	1	SEP1_CAEEL	ROCK_CAEEL	ANI1_CAEEL	G5EC43_CAEEL	G5EG83_CAEEL	K8ESK9_CAEEL	Q8MQ04_CAEEL	Q8MQ03_CAEEL
cellular_component	GO:0036064	ciliary basal body	8	39	0.205128	0.950795	0.104942	1	1	BBS1_CAEEL	OSM3_CAEEL	PTHB1_CAEEL	NPHP1_CAEEL	TTC30_CAEEL	IF122_CAEEL	AJM1_CAEEL	G5ED37_CAEEL
cellular_component	GO:0008021	synaptic vesicle	8	40	0.2	0.946411	0.101956	1	1	SH3GH_CAEEL	PICAL_CAEEL	STX1A_CAEEL	STNB_CAEEL	SYB1_CAEEL	AP2M_CAEEL	DCA11_CAEEL	G5EGT4_CAEEL
biological_process	GO:0007369	gastrulation	8	25	0.32	0.999971	7.38262e-05	1	0.063	RAC1_CAEEL	HMR1_CAEEL	PAR3_CAEEL	CWC22_CAEEL	ARP2_CAEEL	G5EEN3_CAEEL	Q93242_CAEEL	G5EEK5_CAEEL
biological_process	GO:0007626	locomotory behavior	8	33	0.242424	0.6903	0.407806	1	1	RIM_CAEEL	DMD_CAEEL	CAPS_CAEEL	VAB15_CAEEL	DYC1_CAEEL	G5EBQ0_CAEEL	H9G2V2_CAEEL	H9G2V3_CAEEL
biological_process	GO:0035046	pronuclear migration	8	17	0.470588	0.999322	0.00353895	1	0.979	ANC1_CAEEL	G5EC43_CAEEL	G5EG83_CAEEL	Q23542_CAEEL	Q8MQ04_CAEEL	E2JKY8_CAEEL	Q8MQ03_CAEEL	E2JKZ0_CAEEL
biological_process	GO:0016197	endosomal transport	8	30	0.266667	0.875782	0.180406	1	1	GBF1_CAEEL	BL1S6_CAEEL	NBEA_CAEEL	BL1S2_CAEEL	Q9BIF4_CAEEL	Q18930_CAEEL	H2KZI9_CAEEL	Q8MQ92_CAEEL
molecular_function	GO:0030674	protein-macromolecule adaptor activity	8	27	0.296296	0.938463	0.0990949	1	1	RSA2_CAEEL	VPS18_CAEEL	CPNA1_CAEEL	Q68TI8_CAEEL	G5EF88_CAEEL	S6F588_CAEEL	G5EEV7_CAEEL	S6FD39_CAEEL
biological_process	GO:0032502	developmental process	8	16	0.5	1	1.1255e-20	1	0	SLAP2_CAEEL	HLH10_CAEEL	A0A486WV45_CAEEL	O01598_CAEEL	A0A486WUH7_CAEEL	A0A486WV70_CAEEL	A0A486WXX8_CAEEL	A0A486WUJ5_CAEEL
biological_process	GO:0090597	nematode male tail mating organ morphogenesis	8	28	0.285714	0.966089	0.0829255	1	1	SMA9_CAEEL	VAB3_CAEEL	WRT4_CAEEL	G5EBM0_CAEEL	G5ECA1_CAEEL	U4PRY7_CAEEL	Q3V5K0_CAEEL	Q21835_CAEEL
cellular_component	GO:0031201	SNARE complex	8	40	0.2	0.895058	0.199713	1	1	GOSR2_CAEEL	STX1A_CAEEL	SYB1_CAEEL	G5EE26_CAEEL	Q14DX2_CAEEL	Q49HI3_CAEEL	A0A0K3ATN9_CAEEL	O76413_CAEEL
biological_process	GO:0072583	clathrin-dependent endocytosis	8	12	0.666667	0.999898	0.00053007	1	0.396	SH3GH_CAEEL	PICAL_CAEEL	AP2M_CAEEL	G5EDJ6_CAEEL	D7SFQ5_CAEEL	A0A486WXP9_CAEEL	Q22601_CAEEL	D7SFQ6_CAEEL
cellular_component	GO:0048786	presynaptic active zone	8	32	0.25	0.97936	0.0492051	1	1	RIM_CAEEL	LIPB_CAEEL	UNC13_CAEEL	SYB1_CAEEL	CLA1_CAEEL	O44490_CAEEL	G5EDN9_CAEEL	H2KYW1_CAEEL
molecular_function	GO:0008061	chitin binding	8	45	0.177778	0.717565	0.428222	1	1	CBD1_CAEEL	CHIT_CAEEL	Q9XUB6_CAEEL	A0A061AKS9_CAEEL	Q19021_CAEEL	Q22378_CAEEL	Q18529_CAEEL	O16237_CAEEL
molecular_function	GO:0042302	structural constituent of cuticle	8	165	0.0484848	2.06274e-06	1	0	1	CUT4_CAEEL	STX1A_CAEEL	CUT6_CAEEL	Q9GZF7_CAEEL	Q9NAQ4_CAEEL	Q20744_CAEEL	Q19979_CAEEL	Q86NE2_CAEEL
molecular_function	GO:0003690	double-stranded DNA binding	8	37	0.216216	1	3.92517e-08	1	0	ELT2_CAEEL	DHX9_CAEEL	SMC3_CAEEL	TYDP1_CAEEL	K8F7X5_CAEEL	Q9NA35_CAEEL	D3NQB3_CAEEL	K8ESJ1_CAEEL
cellular_component	GO:0005667	transcription regulator complex	8	54	0.148148	0.990371	0.0157827	1	0.984	LIDB1_CAEEL	HLH2_CAEEL	EGL44_CAEEL	DVE1_CAEEL	RCOR_CAEEL	HM32_CAEEL	MDL1_CAEEL	O45233_CAEEL
biological_process	GO:0035150	regulation of tube size	8	12	0.666667	0.999986	0.000158868	1	0.173	LET4_CAEEL	EXC6_CAEEL	RIG6_CAEEL	G5ECM5_CAEEL	G5EC35_CAEEL	G5EFW3_CAEEL	G5EG97_CAEEL	G5EBH3_CAEEL
cellular_component	GO:0031672	A band	8	11	0.727273	1	1.44249e-07	1	0	MAK1_CAEEL	UNC89_CAEEL	TTN1_CAEEL	UNC22_CAEEL	MYO4_CAEEL	MYSP_CAEEL	H2FLH3_CAEEL	H2FLH2_CAEEL
biological_process	GO:0051257	meiotic spindle midzone assembly	8	12	0.666667	0.999986	0.000158868	1	0.173	BUB1_CAEEL	CLAS2_CAEEL	G5EC43_CAEEL	G5EG83_CAEEL	Q22257_CAEEL	Q8MQ04_CAEEL	Q8MQ03_CAEEL	O76447_CAEEL
molecular_function	GO:0019899	enzyme binding	8	45	0.177778	0.997254	0.00391756	1	0.84	FOXO_CAEEL	EXT2_CAEEL	DVE1_CAEEL	EGL27_CAEEL	G5EEN3_CAEEL	O62235_CAEEL	O16635_CAEEL	G5EBZ1_CAEEL
cellular_component	GO:0005764	lysosome	8	120	0.0666667	0.00271115	0.998815	0.242	1	CTNS_CAEEL	ASP17_CAEEL	HRG7_CAEEL	ASM1_CAEEL	Q22368_CAEEL	Q8MYN6_CAEEL	Q20829_CAEEL	Q9XWI0_CAEEL
biological_process	GO:0042074	cell migration involved in gastrulation	8	12	0.666667	0.999986	0.000158868	1	0.173	HMR1_CAEEL	HMP1_CAEEL	EFN4_CAEEL	Q53U86_CAEEL	Q53U87_CAEEL	Q4PIU9_CAEEL	A5JYX3_CAEEL	Q18100_CAEEL
biological_process	GO:0043171	peptide catabolic process	8	24	0.333333	0.880451	0.215984	1	1	PSA_CAEEL	AMP2_CAEEL	Q566A9_CAEEL	H2L0M5_CAEEL	G5ED87_CAEEL	O44183_CAEEL	A8W765_CAEEL	U4PAP4_CAEEL
molecular_function	GO:0004993	G protein-coupled serotonin receptor activity	8	29	0.275862	0.968287	0.0781764	1	1	ACM3_CAEEL	ACM1_CAEEL	G5ECV2_CAEEL	O17470_CAEEL	O44986_CAEEL	A0A486WU00_CAEEL	O45732_CAEEL	O45601_CAEEL
cellular_component	GO:0008076	voltage-gated potassium channel complex	8	47	0.170213	0.783466	0.349218	1	1	G5EC00_CAEEL	Q8I4L1_CAEEL	Q8I4L4_CAEEL	Q19464_CAEEL	G5EDK3_CAEEL	Q8I4L3_CAEEL	G5ECD2_CAEEL	Q8I4L2_CAEEL
molecular_function	GO:0005251	delayed rectifier potassium channel activity	8	43	0.186047	0.76235	0.376383	1	1	G5EC00_CAEEL	Q8I4L1_CAEEL	Q8I4L4_CAEEL	Q19464_CAEEL	G5EDK3_CAEEL	Q8I4L3_CAEEL	G5ECD2_CAEEL	Q8I4L2_CAEEL
biological_process	GO:0006515	protein quality control for misfolded or incompletely synthesized proteins	8	14	0.571429	0.993741	0.0213569	1	1	G5EFH6_CAEEL	A0A131MCH9_CAEEL	A0A0K3AVD4_CAEEL	A0A0K3AW37_CAEEL	A0A0K3AT32_CAEEL	A0A0K3AYC5_CAEEL	A0A0K3ASH9_CAEEL	A0A0K3ASI0_CAEEL
biological_process	GO:0006811	ion transport	8	73	0.109589	0.000781006	0.999437	0.304	1	CNNM5_CAEEL	G5ED53_CAEEL	G5EFI1_CAEEL	G5EER9_CAEEL	Q95Q96_CAEEL	G5EEZ9_CAEEL	G5EDG3_CAEEL	Q8I4D2_CAEEL
molecular_function	GO:0004383	guanylate cyclase activity	8	43	0.186047	0.76235	0.376383	1	1	DAF11_CAEEL	GCY12_CAEEL	GCY1_CAEEL	GCY20_CAEEL	GCY23_CAEEL	GCY35_CAEEL	GCY8_CAEEL	A0A0K3AUK6_CAEEL
biological_process	GO:0007168	receptor guanylyl cyclase signaling pathway	8	30	0.266667	0.948479	0.115553	1	1	DAF11_CAEEL	EGL4_CAEEL	HDA4_CAEEL	GCY12_CAEEL	GCY1_CAEEL	GCY20_CAEEL	GCY23_CAEEL	GCY8_CAEEL
cellular_component	GO:0030136	clathrin-coated vesicle	8	15	0.533333	0.999923	0.000282179	1	0.067	PICAL_CAEEL	STNB_CAEEL	SLAP2_CAEEL	VPS18_CAEEL	Q9U3A6_CAEEL	Q8I4H0_CAEEL	Q8I4G9_CAEEL	A5JYR4_CAEEL
biological_process	GO:0051256	mitotic spindle midzone assembly	8	12	0.666667	0.999986	0.000158868	1	0.173	CDC14_CAEEL	CLAS2_CAEEL	G5EC43_CAEEL	G5EG83_CAEEL	V6CL80_CAEEL	Q8MQ04_CAEEL	Q8MQ03_CAEEL	V6CLB1_CAEEL
molecular_function	GO:0032266	phosphatidylinositol-3-phosphate binding	8	19	0.421053	0.998696	0.00592424	1	0.949	ATG2_CAEEL	G5ED80_CAEEL	Q18930_CAEEL	G5ED98_CAEEL	H2KZI9_CAEEL	Q5FC45_CAEEL	Q17796_CAEEL	Q8MQ92_CAEEL
molecular_function	GO:0005178	integrin binding	8	13	0.615385	0.999975	0.000247307	1	0.103	G5EGK1_CAEEL	A0A0K3AQU9_CAEEL	G4S9F5_CAEEL	A0A0K3ATT6_CAEEL	H2KYX2_CAEEL	Q95XN3_CAEEL	Q5LK46_CAEEL	H2KYX3_CAEEL
biological_process	GO:0007187	G protein-coupled receptor signaling pathway, coupled to cyclic nucleotide second messenger	8	28	0.285714	0.979881	0.0515211	1	1	ACM3_CAEEL	ACM1_CAEEL	G5ECV2_CAEEL	O17470_CAEEL	O44986_CAEEL	A0A486WU00_CAEEL	O45732_CAEEL	O45601_CAEEL
biological_process	GO:0006517	protein deglycosylation	8	14	0.571429	0.998844	0.00544567	1	0.996	G5EFH6_CAEEL	A0A131MCH9_CAEEL	A0A0K3AVD4_CAEEL	A0A0K3AW37_CAEEL	A0A0K3AT32_CAEEL	A0A0K3AYC5_CAEEL	A0A0K3ASH9_CAEEL	A0A0K3ASI0_CAEEL
molecular_function	GO:0000224	peptide-N4-(N-acetyl-beta-glucosaminyl)asparagine amidase activity	8	10	0.8	0.999999	1.36074e-05	1	0.006	G5EFH6_CAEEL	A0A131MCH9_CAEEL	A0A0K3AVD4_CAEEL	A0A0K3AW37_CAEEL	A0A0K3AT32_CAEEL	A0A0K3AYC5_CAEEL	A0A0K3ASH9_CAEEL	A0A0K3ASI0_CAEEL
cellular_component	GO:0098858	actin-based cell projection	8	8	1	1	1.34042e-07	1	0	S6F568_CAEEL	S6EZR2_CAEEL	Q20456_CAEEL	D3YT13_CAEEL	B6VQ62_CAEEL	S6FD20_CAEEL	D3YT14_CAEEL	C6KRJ0_CAEEL
biological_process	GO:0048513	animal organ development	8	8	1	1	6.19173e-15	1	0	Q86MF0_CAEEL	V6CKK8_CAEEL	V6CLX8_CAEEL	Q86ME9_CAEEL	V6CLX2_CAEEL	V6CJE7_CAEEL	V6CLS2_CAEEL	V6CLW4_CAEEL
biological_process	GO:0045165	cell fate commitment	7	27	0.259259	0.99999	1.95033e-05	1	0.015	ELT2_CAEEL	ELT1_CAEEL	VAB3_CAEEL	G5EGF4_CAEEL	G5EGN3_CAEEL	B7WN96_CAEEL	U4PMB4_CAEEL
biological_process	GO:0040010	positive regulation of growth rate	7	36	0.194444	0.754042	0.397685	1	1	TRR1_CAEEL	CNG_CAEEL	RT4I1_CAEEL	Q9U3A6_CAEEL	Q8I4H0_CAEEL	Q8I4G9_CAEEL	A5JYR4_CAEEL
biological_process	GO:0007029	endoplasmic reticulum organization	7	20	0.35	0.784016	0.351032	1	1	GBF1_CAEEL	Q9BMU4_CAEEL	G4RT15_CAEEL	O61825_CAEEL	Q9XXT5_CAEEL	Q688Z6_CAEEL	G5EFY6_CAEEL
molecular_function	GO:0008236	serine-type peptidase activity	7	18	0.388889	0.965231	0.0625376	1	1	YM9I_CAEEL	NUP98_CAEEL	H2KZK7_CAEEL	Q965K3_CAEEL	G5EFJ8_CAEEL	Q18198_CAEEL	Q9GRV9_CAEEL
biological_process	GO:0110039	positive regulation of nematode male tail tip morphogenesis	7	36	0.194444	0.754042	0.397685	1	1	BUB1_CAEEL	VAV_CAEEL	NLK_CAEEL	RCANL_CAEEL	NFYA1_CAEEL	Q21436_CAEEL	U4PMB4_CAEEL
cellular_component	GO:0005694	chromosome	7	43	0.162791	0.999719	0.000436993	1	0.126	SEP1_CAEEL	TNKS1_CAEEL	MET2_CAEEL	MBK2_CAEEL	SZY20_CAEEL	WRN_CAEEL	BARD1_CAEEL
cellular_component	GO:0000794	condensed nuclear chromosome	7	41	0.170732	0.97538	0.0499024	1	1	SEP1_CAEEL	HM39_CAEEL	SMC6_CAEEL	G5EBQ3_CAEEL	Q27GU1_CAEEL	H2KZD5_CAEEL	Q09409_CAEEL
biological_process	GO:0051307	meiotic chromosome separation	7	12	0.583333	0.940452	0.119549	1	1	SEP1_CAEEL	BUB1_CAEEL	CLAS2_CAEEL	Q22257_CAEEL	Q23491_CAEEL	O76447_CAEEL	G5EBZ1_CAEEL
biological_process	GO:0000281	mitotic cytokinesis	7	38	0.184211	0.880074	0.210433	1	1	SEP1_CAEEL	CDC14_CAEEL	MBK2_CAEEL	ROCK_CAEEL	ANI1_CAEEL	CLAS2_CAEEL	Q9U364_CAEEL
molecular_function	GO:0016757	glycosyltransferase activity	7	123	0.0569106	5.24358e-09	1	0	1	EXT2_CAEEL	BRE2_CAEEL	O62165_CAEEL	Q9NAL8_CAEEL	O16275_CAEEL	Q9NEJ9_CAEEL	A0A078BTR2_CAEEL
molecular_function	GO:0044877	protein-containing complex binding	7	28	0.25	1	8.74552e-22	1	0	DVE1_CAEEL	NUF2_CAEEL	SYG1_CAEEL	TOR_CAEEL	CED2_CAEEL	G5EEN3_CAEEL	Q9N3H3_CAEEL
molecular_function	GO:0008237	metallopeptidase activity	7	28	0.25	0.975854	0.0360637	1	1	PRP8_CAEEL	GON1_CAEEL	MMPB_CAEEL	O44183_CAEEL	O61792_CAEEL	H2L2A7_CAEEL	U4PAP4_CAEEL
biological_process	GO:0071277	cellular response to calcium ion	7	25	0.28	0.954459	0.110918	1	1	CPNA5_CAEEL	CLA1_CAEEL	G5EDP5_CAEEL	Q23056_CAEEL	Q8I4L8_CAEEL	G5EFC6_CAEEL	Q22422_CAEEL
biological_process	GO:0007617	mating behavior	7	13	0.538462	0.905613	0.164987	1	1	RIM_CAEEL	PKD1_CAEEL	UNC53_CAEEL	FOX1_CAEEL	G5EEU6_CAEEL	C8JQR2_CAEEL	G5EBX1_CAEEL
biological_process	GO:0045216	cell-cell junction organization	7	9	0.777778	0.999898	0.00053007	1	0.396	AJM1_CAEEL	Q8I103_CAEEL	H2KYC5_CAEEL	H1UBL0_CAEEL	Q56VX4_CAEEL	H1UBK9_CAEEL	Q95ZY7_CAEEL
molecular_function	GO:0001786	phosphatidylserine binding	7	29	0.241379	0.921824	0.16748	1	1	CLA1_CAEEL	G5EDP5_CAEEL	Q23056_CAEEL	Q27512_CAEEL	Q7JMT5_CAEEL	Q8I4L8_CAEEL	G5EFC6_CAEEL
biological_process	GO:0061067	negative regulation of dauer larval development	7	14	0.5	0.978643	0.0615003	1	1	PER_CAEEL	DAF14_CAEEL	DAF11_CAEEL	DAF25_CAEEL	EGL4_CAEEL	LIN29_CAEEL	GCY12_CAEEL
molecular_function	GO:0004252	serine-type endopeptidase activity	7	51	0.137255	0.421958	0.723912	1	1	BLI4_CAEEL	A0A0K3AV34_CAEEL	Q9U2S3_CAEEL	A0A0K3AXE4_CAEEL	A0A0K3AS30_CAEEL	H2KML1_CAEEL	Q9U2V5_CAEEL
biological_process	GO:0045214	sarcomere organization	7	33	0.212121	0.975535	0.0533756	1	1	TMOD_CAEEL	SRBS1_CAEEL	DMD_CAEEL	UNC89_CAEEL	DYC1_CAEEL	O17939_CAEEL	H2KYL9_CAEEL
biological_process	GO:0006325	chromatin organization	7	56	0.125	0.322332	0.735981	1	1	HDA6_CAEEL	FAM50_CAEEL	DCP66_CAEEL	ZFP1_CAEEL	HDA4_CAEEL	G5EGI1_CAEEL	A0A2C9C364_CAEEL
biological_process	GO:0006338	chromatin remodeling	7	23	0.304348	0.573549	0.557548	1	1	HCF1_CAEEL	DVE1_CAEEL	G5EEY5_CAEEL	Q565A2_CAEEL	X5M5M2_CAEEL	P91019_CAEEL	J7SA49_CAEEL
cellular_component	GO:0000159	protein phosphatase type 2A complex	7	18	0.388889	0.998105	0.00876371	1	0.904	RSA2_CAEEL	SPD5_CAEEL	2AAA_CAEEL	A0A1N7SYT5_CAEEL	A0A1N7SYW5_CAEEL	Q17744_CAEEL	H8W3X6_CAEEL
biological_process	GO:0008356	asymmetric cell division	7	28	0.25	0.991752	0.0185352	1	1	APC1_CAEEL	KC1G_CAEEL	CDC27_CAEEL	PAR3_CAEEL	MOM4_CAEEL	NLK_CAEEL	APR1_CAEEL
biological_process	GO:0016042	lipid catabolic process	7	74	0.0945946	0.00206457	0.998982	0.544	1	LIP1_CAEEL	ABH52_CAEEL	G5EFG8_CAEEL	Q8IA75_CAEEL	O17766_CAEEL	Q19941_CAEEL	Q8IA76_CAEEL
molecular_function	GO:0003727	single-stranded RNA binding	7	29	0.241379	0.760523	0.3563	1	1	SEA2_CAEEL	ASD2_CAEEL	GLD1_CAEEL	G5EEW7_CAEEL	G5EF15_CAEEL	D4YW53_CAEEL	G5EES3_CAEEL
biological_process	GO:0007548	sex differentiation	7	34	0.205882	0.999616	0.000629924	1	0.429	SEA2_CAEEL	MET2_CAEEL	SDC2_CAEEL	LI15B_CAEEL	TRA2_CAEEL	LI15A_CAEEL	FOX1_CAEEL
biological_process	GO:0000723	telomere maintenance	7	24	0.291667	0.912423	0.175333	1	1	TRR1_CAEEL	ATM_CAEEL	WRN_CAEEL	Q19604_CAEEL	Q9U2D2_CAEEL	O62217_CAEEL	Q9XVR0_CAEEL
biological_process	GO:0006364	rRNA processing	7	69	0.101449	1.98209e-05	0.999994	0.007	1	DDX47_CAEEL	DHX15_CAEEL	UTP18_CAEEL	L8E6W9_CAEEL	O61851_CAEEL	Q9N533_CAEEL	Q688Z3_CAEEL
cellular_component	GO:0030173	integral component of Golgi membrane	7	49	0.142857	0.605143	0.55598	1	1	SRF3_CAEEL	UNC50_CAEEL	YC2L_CAEEL	BLI4_CAEEL	Q20913_CAEEL	Q8I7G0_CAEEL	Q2PJ77_CAEEL
biological_process	GO:0040026	positive regulation of vulval development	7	44	0.159091	0.539762	0.621182	1	1	SEM2_CAEEL	SOS_CAEEL	LIDB1_CAEEL	CCNE_CAEEL	PTP2_CAEEL	LIN10_CAEEL	SIG7_CAEEL
molecular_function	GO:0046982	protein heterodimerization activity	7	61	0.114754	0.223217	0.873571	1	1	SOS_CAEEL	HLH2_CAEEL	MXL3_CAEEL	MDL1_CAEEL	HLH10_CAEEL	Q20563_CAEEL	A0A486WXD9_CAEEL
molecular_function	GO:0004386	helicase activity	7	36	0.194444	0.961437	0.0601248	1	1	SSL1_CAEEL	YQ12_CAEEL	YP93_CAEEL	Q20644_CAEEL	O61845_CAEEL	U4PRA5_CAEEL	Q18633_CAEEL
molecular_function	GO:0004715	non-membrane spanning protein tyrosine kinase activity	7	49	0.142857	0.470222	0.682932	1	1	SID3_CAEEL	SRC2_CAEEL	YX05_CAEEL	ARK1_CAEEL	Q2EEM6_CAEEL	Q9U3B5_CAEEL	Q22243_CAEEL
molecular_function	GO:0031625	ubiquitin protein ligase binding	7	49	0.142857	0.470222	0.682932	1	1	LGG2_CAEEL	FOXO_CAEEL	CUL2_CAEEL	BAT42_CAEEL	SPOP_CAEEL	PAR1_CAEEL	UBE4_CAEEL
biological_process	GO:0006289	nucleotide-excision repair	7	24	0.291667	0.949478	0.104549	1	1	UBQL_CAEEL	K8F7X5_CAEEL	Q9NA35_CAEEL	Q8T3E0_CAEEL	D3NQB3_CAEEL	O62217_CAEEL	K8ESJ1_CAEEL
biological_process	GO:0000381	regulation of alternative mRNA splicing, via spliceosome	7	44	0.159091	0.539762	0.621182	1	1	ASD2_CAEEL	FOX1_CAEEL	G5EEW7_CAEEL	D4YW53_CAEEL	Q9BLA0_CAEEL	Q86G94_CAEEL	M1ZJT7_CAEEL
biological_process	GO:0046777	protein autophosphorylation	7	22	0.318182	0.983974	0.0455406	1	1	MAK1_CAEEL	MBK1_CAEEL	MBK2_CAEEL	MOM4_CAEEL	TLK1_CAEEL	Q2XN10_CAEEL	G3MTX3_CAEEL
biological_process	GO:0045664	regulation of neuron differentiation	7	15	0.466667	0.99947	0.00233737	1	0.895	CNG_CAEEL	EGL43_CAEEL	LIM4_CAEEL	SCD2_CAEEL	ZAG1_CAEEL	CEH28_CAEEL	HDA4_CAEEL
biological_process	GO:0002064	epithelial cell development	7	11	0.636364	1	4.39046e-07	1	0.001	LET4_CAEEL	EXC6_CAEEL	G5ECM5_CAEEL	G5EC35_CAEEL	G5EFW3_CAEEL	G5EG97_CAEEL	G5EBH3_CAEEL
biological_process	GO:0050808	synapse organization	7	23	0.304348	0.999959	9.90615e-05	1	0.084	LIPB_CAEEL	SYG1_CAEEL	SYG2_CAEEL	G5EDQ4_CAEEL	G5EDV5_CAEEL	G5EGA4_CAEEL	G5EF89_CAEEL
biological_process	GO:0000226	microtubule cytoskeleton organization	7	50	0.14	1	6.90656e-08	1	0	CDC14_CAEEL	PAR3_CAEEL	TTLL9_CAEEL	PAR1_CAEEL	CLAP3_CAEEL	CLAS2_CAEEL	K8ESK4_CAEEL
biological_process	GO:1990573	potassium ion import across plasma membrane	7	47	0.148936	0.434635	0.713953	1	1	Q9XUG9_CAEEL	O16436_CAEEL	P90735_CAEEL	Q6A583_CAEEL	O44846_CAEEL	A0A131MBN3_CAEEL	A0A0K3AX20_CAEEL
cellular_component	GO:0005884	actin filament	7	16	0.4375	0.99998	0.000103893	1	0.034	G5EBK3_CAEEL	G5EES2_CAEEL	D0IMZ6_CAEEL	D0IMZ5_CAEEL	D0IMZ8_CAEEL	D0IMZ7_CAEEL	Q3V5K0_CAEEL
cellular_component	GO:0005882	intermediate filament	7	18	0.388889	0.995807	0.0165151	1	0.988	IFD2_CAEEL	IFA3_CAEEL	MUA3_CAEEL	IFA1_CAEEL	G5EDN8_CAEEL	A0A4V0IIR6_CAEEL	A0A5E4LYE2_CAEEL
molecular_function	GO:0045505	dynein intermediate chain binding	7	18	0.388889	0.996021	0.0162168	1	1	DYHC2_CAEEL	DYHC_CAEEL	Q23542_CAEEL	E2JKY8_CAEEL	A0A163VTS9_CAEEL	G5EDV4_CAEEL	E2JKZ0_CAEEL
cellular_component	GO:0043296	apical junction complex	7	10	0.7	1	3.65771e-07	1	0	HMP1_CAEEL	PAR3_CAEEL	DLG1_CAEEL	AJM1_CAEEL	H2KYC5_CAEEL	Q95ZY7_CAEEL	A5JYX3_CAEEL
biological_process	GO:0030488	tRNA methylation	7	27	0.259259	0.824667	0.309797	1	1	H2L2B2_CAEEL	W6RTG0_CAEEL	H2L2B3_CAEEL	Q2AAB7_CAEEL	Q8I4I7_CAEEL	Q20453_CAEEL	Q7YTV3_CAEEL
molecular_function	GO:0005319	lipid transporter activity	7	15	0.466667	0.642219	0.476681	1	1	VIT2_CAEEL	VIT6_CAEEL	CED7_CAEEL	Q9XW49_CAEEL	X5LXB2_CAEEL	Q1RS86_CAEEL	Q9TXV8_CAEEL
biological_process	GO:0035329	hippo signaling	7	11	0.636364	1	4.39046e-07	1	0.001	EGL44_CAEEL	YAP1_CAEEL	A0A2C9C3C4_CAEEL	A0A2C9C3H3_CAEEL	A0A2C9C2P8_CAEEL	A0A2C9C333_CAEEL	A0A2C9C2W1_CAEEL
biological_process	GO:0009410	response to xenobiotic stimulus	7	38	0.184211	0.194699	0.881966	1	1	GABR2_CAEEL	UNC80_CAEEL	ACM3_CAEEL	GABR1_CAEEL	Q17645_CAEEL	G5ECI9_CAEEL	Q95Q96_CAEEL
cellular_component	GO:0030864	cortical actin cytoskeleton	7	21	0.333333	0.991549	0.0247302	1	1	G5EG85_CAEEL	Q9U9J8_CAEEL	O17939_CAEEL	Q9XUT0_CAEEL	S6FN00_CAEEL	E0AHA7_CAEEL	H2KYW1_CAEEL
biological_process	GO:0007097	nuclear migration	7	14	0.5	0.999973	0.000129579	1	0.108	DYHC_CAEEL	ZDHCS_CAEEL	Q23542_CAEEL	E2JKY8_CAEEL	E2JKZ0_CAEEL	L8EC32_CAEEL	L8E938_CAEEL
biological_process	GO:0071711	basement membrane organization	7	11	0.636364	0.996587	0.0120013	1	1	EPI1_CAEEL	DIG1_CAEEL	G5EEV6_CAEEL	H1ZUX0_CAEEL	C1P640_CAEEL	C1P641_CAEEL	H1ZUX1_CAEEL
biological_process	GO:0006406	mRNA export from nucleus	7	27	0.259259	0.761428	0.378295	1	1	NPP5_CAEEL	G5ED26_CAEEL	A0A486WX27_CAEEL	H2KAQ0_CAEEL	Q5WRT8_CAEEL	A0A486WY01_CAEEL	Q5WRT9_CAEEL
biological_process	GO:0038202	TORC1 signaling	7	8	0.875	0.9998	0.00115555	1	0.695	SMG1_CAEEL	TOR_CAEEL	Q68TI8_CAEEL	G5EF88_CAEEL	S6F588_CAEEL	G5EEV7_CAEEL	S6FD39_CAEEL
cellular_component	GO:0031931	TORC1 complex	7	9	0.777778	0.999999	3.20512e-05	1	0.009	SMG1_CAEEL	TOR_CAEEL	Q68TI8_CAEEL	G5EF88_CAEEL	S6F588_CAEEL	G5EEV7_CAEEL	S6FD39_CAEEL
biological_process	GO:0009267	cellular response to starvation	7	13	0.538462	0.838395	0.256184	1	1	Q68TI8_CAEEL	G5EF88_CAEEL	H1UBJ1_CAEEL	S6F588_CAEEL	G5EEV7_CAEEL	Q9XWQ4_CAEEL	S6FD39_CAEEL
molecular_function	GO:0019992	diacylglycerol binding	7	7	1	1	2.57998e-06	1	0	UNC13_CAEEL	A0A1C3NSJ3_CAEEL	G5EDN9_CAEEL	A0A1C3NSI0_CAEEL	A0A1C3NSH2_CAEEL	A0A1C3NSN5_CAEEL	A0A1C3NSL4_CAEEL
cellular_component	GO:0009897	external side of plasma membrane	7	53	0.132075	0.448416	0.700356	1	1	Q9UB29_CAEEL	Q9UB28_CAEEL	H2L0C1_CAEEL	Q5WRN9_CAEEL	A0A061AD52_CAEEL	G5EFM5_CAEEL	O45275_CAEEL
molecular_function	GO:0016504	peptidase activator activity	7	12	0.583333	0.998423	0.007796	1	0.987	FBLN1_CAEEL	N1NTN5_CAEEL	Q17971_CAEEL	A0A061AIV4_CAEEL	A0A061AKL1_CAEEL	P91834_CAEEL	A0A061ADQ1_CAEEL
cellular_component	GO:0032039	integrator complex	7	17	0.411765	0.998799	0.00609254	1	0.847	E5QCH1_CAEEL	O01483_CAEEL	H2KZC8_CAEEL	O45075_CAEEL	Q86MG4_CAEEL	B7WN63_CAEEL	Q23271_CAEEL
biological_process	GO:0035020	regulation of Rac protein signal transduction	7	7	1	1	5.16457e-12	1	0	H2KZX8_CAEEL	A0A2K5AU32_CAEEL	A0A2K5AU29_CAEEL	C5NU64_CAEEL	A0A2K5AU28_CAEEL	A0A2K5AU23_CAEEL	A0A2K5AU25_CAEEL
biological_process	GO:0007276	gamete generation	6	29	0.206897	0.999482	0.000841975	1	0.638	LIN41_CAEEL	MES2_CAEEL	CGH1_CAEEL	H1ZUX0_CAEEL	P90786_CAEEL	H1ZUX1_CAEEL
biological_process	GO:0007005	mitochondrion organization	6	35	0.171429	0.102427	0.930603	1	1	VDAC_CAEEL	GBF1_CAEEL	PAT2_CAEEL	UNC52_CAEEL	Q18965_CAEEL	Q9U208_CAEEL
biological_process	GO:2000114	regulation of establishment of cell polarity	6	12	0.5	0.995813	0.0193944	1	1	PDE1_CAEEL	KAD2_CAEEL	HLH2_CAEEL	NCL1_CAEEL	Q19818_CAEEL	G5EE33_CAEEL
molecular_function	GO:0008239	dipeptidyl-peptidase activity	6	16	0.375	0.992204	0.030821	1	1	YM9I_CAEEL	H2KZK7_CAEEL	Q965K3_CAEEL	G5EFJ8_CAEEL	Q18198_CAEEL	Q9GRV9_CAEEL
biological_process	GO:0007162	negative regulation of cell adhesion	6	8	0.75	0.999975	0.000449341	1	0.358	PLX2_CAEEL	U4PF39_CAEEL	U4PRY7_CAEEL	Q3V5K0_CAEEL	U4PBW0_CAEEL	O17084_CAEEL
biological_process	GO:0050772	positive regulation of axonogenesis	6	8	0.75	1	8.68108e-11	1	0	PLX2_CAEEL	O01847_CAEEL	U4PF39_CAEEL	U4PRY7_CAEEL	Q3V5K0_CAEEL	U4PBW0_CAEEL
biological_process	GO:1901076	positive regulation of engulfment of apoptotic cell	6	15	0.4	0.993273	0.027839	1	1	RAC1_CAEEL	PAT2_CAEEL	CED2_CAEEL	CED7_CAEEL	G5EEN3_CAEEL	Q22667_CAEEL
biological_process	GO:0050708	regulation of protein secretion	6	10	0.6	0.998128	0.00804488	1	0.997	Q9U2S3_CAEEL	A0A0K3ATN9_CAEEL	A0A0K3AXE4_CAEEL	A0A0K3AS30_CAEEL	H2KML1_CAEEL	Q9U2V5_CAEEL
molecular_function	GO:0003735	structural constituent of ribosome	6	157	0.0382166	1.45069e-06	1	0	1	RT24_CAEEL	RM44_CAEEL	RM03_CAEEL	Q9N4L5_CAEEL	O61818_CAEEL	P91862_CAEEL
biological_process	GO:0048208	COPII vesicle coating	6	9	0.666667	0.999358	0.00468987	1	0.996	A0A4V0IKA6_CAEEL	Q95ZV3_CAEEL	A0A4V0IM30_CAEEL	A0A4V0IKE4_CAEEL	H2KZQ8_CAEEL	H2KZQ9_CAEEL
biological_process	GO:0070973	protein localization to endoplasmic reticulum exit site	6	8	0.75	0.999975	0.000449341	1	0.358	A0A4V0IKA6_CAEEL	Q95ZV3_CAEEL	A0A4V0IM30_CAEEL	A0A4V0IKE4_CAEEL	H2KZQ8_CAEEL	H2KZQ9_CAEEL
cellular_component	GO:0005911	cell-cell junction	6	27	0.222222	1	1.65719e-21	1	0	SYG1_CAEEL	SYG2_CAEEL	AJM1_CAEEL	G5EDN8_CAEEL	Q93198_CAEEL	G5EC72_CAEEL
biological_process	GO:0043068	positive regulation of programmed cell death	6	12	0.5	0.989798	0.0244645	1	1	HLH2_CAEEL	VPP1_CAEEL	B7WN66_CAEEL	Q94279_CAEEL	I2HAA7_CAEEL	I2HAA6_CAEEL
biological_process	GO:0060282	positive regulation of oocyte development	6	11	0.545455	0.999358	0.00468987	1	0.996	VAS1_CAEEL	LIN41_CAEEL	SIG7_CAEEL	UNC13_CAEEL	GLD1_CAEEL	ATX2_CAEEL
biological_process	GO:0000212	meiotic spindle organization	6	12	0.5	0.999322	0.00353895	1	0.979	BUB1_CAEEL	ZYG9_CAEEL	CLAS2_CAEEL	Q22257_CAEEL	O17666_CAEEL	O76447_CAEEL
biological_process	GO:0019722	calcium-mediated signaling	6	17	0.352941	0.995667	0.0158669	1	1	CNG_CAEEL	STX1A_CAEEL	RCANL_CAEEL	G5ECV2_CAEEL	O17470_CAEEL	H2KYW1_CAEEL
cellular_component	GO:0012505	endomembrane system	6	70	0.0857143	0.999213	0.00101435	1	0.26	GLP1_CAEEL	STX1A_CAEEL	G5EF26_CAEEL	A4UZ34_CAEEL	Q7K7J0_CAEEL	G5EDI2_CAEEL
biological_process	GO:0008380	RNA splicing	6	34	0.176471	0.166522	0.874047	1	1	DHX9_CAEEL	DHX15_CAEEL	SYM2_CAEEL	DHX16_CAEEL	ASD2_CAEEL	G8JY03_CAEEL
biological_process	GO:1903356	positive regulation of distal tip cell migration	6	18	0.333333	0.978993	0.0662542	1	1	RAC1_CAEEL	HLH2_CAEEL	RIG6_CAEEL	CED2_CAEEL	CED7_CAEEL	G5EEN3_CAEEL
biological_process	GO:1905815	regulation of dorsal/ventral axon guidance	6	12	0.5	0.998682	0.00806187	1	0.997	RAC1_CAEEL	RPM1_CAEEL	G5EBV3_CAEEL	O61528_CAEEL	C4ALD5_CAEEL	Q17490_CAEEL
biological_process	GO:0030866	cortical actin cytoskeleton organization	6	23	0.26087	0.99478	0.0143374	1	1	HMR1_CAEEL	FOZI1_CAEEL	HMP1_CAEEL	ROCK_CAEEL	CLH_CAEEL	A5JYX3_CAEEL
cellular_component	GO:0005769	early endosome	6	64	0.09375	0.568876	0.560172	1	1	VPS18_CAEEL	G5ED80_CAEEL	G5EGT4_CAEEL	Q5FC45_CAEEL	Q17796_CAEEL	Q6AHQ8_CAEEL
biological_process	GO:0007010	cytoskeleton organization	6	20	0.3	1	1.05422e-35	1	0	ANC1_CAEEL	G5ECM5_CAEEL	X5LV34_CAEEL	X5M8S5_CAEEL	Q09989_CAEEL	Q6AHQ8_CAEEL
biological_process	GO:0006936	muscle contraction	6	30	0.2	0.691186	0.416598	1	1	UNC58_CAEEL	MYO2_CAEEL	MYO4_CAEEL	KETN1_CAEEL	Q22667_CAEEL	H2KYL9_CAEEL
molecular_function	GO:0019905	syntaxin binding	6	40	0.15	0.675009	0.485621	1	1	VPS54_CAEEL	SYB1_CAEEL	CLA1_CAEEL	O44412_CAEEL	Q23056_CAEEL	A0A0K3ATN9_CAEEL
biological_process	GO:0009887	animal organ morphogenesis	6	24	0.25	1	3.32316e-07	1	0.001	LAM2_CAEEL	EPI1_CAEEL	SPTF3_CAEEL	UNC52_CAEEL	LE756_CAEEL	G5ECE3_CAEEL
biological_process	GO:0006937	regulation of muscle contraction	6	41	0.146341	0.703118	0.422375	1	1	CAPS_CAEEL	UNC50_CAEEL	UNC58_CAEEL	CBPE_CAEEL	P90735_CAEEL	H2KYL9_CAEEL
molecular_function	GO:0005507	copper ion binding	6	22	0.272727	0.951093	0.124781	1	1	TBH1_CAEEL	MIG38_CAEEL	Q95XC6_CAEEL	O01497_CAEEL	A0A0K3ATC0_CAEEL	Q19687_CAEEL
molecular_function	GO:0003678	DNA helicase activity	6	30	0.2	0.717565	0.428222	1	1	DHX9_CAEEL	Q9XXI9_CAEEL	Q9U2D2_CAEEL	Q9XVR7_CAEEL	O62217_CAEEL	Q8MYM8_CAEEL
biological_process	GO:0031929	TOR signaling	6	13	0.461538	0.989798	0.0244645	1	1	TOR_CAEEL	Q68TI8_CAEEL	G5EF88_CAEEL	S6F588_CAEEL	G5EEV7_CAEEL	S6FD39_CAEEL
biological_process	GO:0033365	protein localization to organelle	6	13	0.461538	0.999487	0.000846604	1	0.641	RSA2_CAEEL	SPD5_CAEEL	B7WN66_CAEEL	Q94279_CAEEL	I2HAA7_CAEEL	I2HAA6_CAEEL
molecular_function	GO:0001228	DNA-binding transcription activator activity, RNA polymerase II-specific	6	34	0.176471	0.708032	0.462772	1	1	CHE1_CAEEL	EGL43_CAEEL	GRH1_CAEEL	LIN29_CAEEL	Q93779_CAEEL	Q18624_CAEEL
cellular_component	GO:0005765	lysosomal membrane	6	69	0.0869565	0.105786	0.94967	1	1	CTNS_CAEEL	VPS18_CAEEL	K0M7B5_CAEEL	S6FMZ4_CAEEL	S6FCY3_CAEEL	J7S130_CAEEL
biological_process	GO:0006368	transcription elongation from RNA polymerase II promoter	6	15	0.4	0.999006	0.00433345	1	0.985	SPT16_CAEEL	ELOA1_CAEEL	CDK12_CAEEL	Q1XFY2_CAEEL	Q9TZM9_CAEEL	Q9N554_CAEEL
biological_process	GO:0000077	DNA damage checkpoint signaling	6	20	0.3	0.952128	0.0938559	1	1	TRR1_CAEEL	HSR9_CAEEL	ATM_CAEEL	CHK1_CAEEL	Q18939_CAEEL	A0A1W7LFZ8_CAEEL
cellular_component	GO:0016323	basolateral plasma membrane	6	66	0.0909091	0.153701	0.922101	1	1	MTP_CAEEL	STX1A_CAEEL	DLG1_CAEEL	A0A131MBS2_CAEEL	A0A3B1E616_CAEEL	Q9XW36_CAEEL
biological_process	GO:0045167	asymmetric protein localization involved in cell fate determination	6	25	0.24	0.8473	0.291766	1	1	MBK2_CAEEL	MOM4_CAEEL	PAR1_CAEEL	NLK_CAEEL	Q9U364_CAEEL	Q9GUP2_CAEEL
biological_process	GO:0045793	positive regulation of cell size	6	11	0.545455	0.999358	0.00468987	1	0.996	SMA4_CAEEL	ZDHCS_CAEEL	G5EC35_CAEEL	G5EFW3_CAEEL	G5EG97_CAEEL	G5EBH3_CAEEL
biological_process	GO:0006906	vesicle fusion	6	29	0.206897	0.600632	0.536836	1	1	GOSR2_CAEEL	STX1A_CAEEL	SYB1_CAEEL	G5EDP5_CAEEL	Q8I4L8_CAEEL	G5EFC6_CAEEL
biological_process	GO:0007076	mitotic chromosome condensation	6	12	0.5	0.999625	0.00219261	1	0.885	Q9N583_CAEEL	Q95Y84_CAEEL	X5M5W2_CAEEL	Q22847_CAEEL	X5M900_CAEEL	C6KRI9_CAEEL
biological_process	GO:0043050	pharyngeal pumping	6	31	0.193548	0.789161	0.293543	1	1	PXL1_CAEEL	G5EEL1_CAEEL	G5EFG1_CAEEL	G5EFL5_CAEEL	G5EC72_CAEEL	G5EEF6_CAEEL
biological_process	GO:0050907	detection of chemical stimulus involved in sensory perception	6	31	0.193548	0.746554	0.419781	1	1	SRA10_CAEEL	SRA11_CAEEL	CNG_CAEEL	SRA9_CAEEL	SRA12_CAEEL	Q3Y412_CAEEL
cellular_component	GO:0031941	filamentous actin	6	14	0.428571	0.998414	0.00881603	1	0.91	EXC6_CAEEL	G5EEL1_CAEEL	G5EFG1_CAEEL	G5EFL5_CAEEL	G5EC72_CAEEL	G5EEF6_CAEEL
molecular_function	GO:0003697	single-stranded DNA binding	6	41	0.146341	0.385351	0.762903	1	1	SMC6_CAEEL	TYDP1_CAEEL	Q9XXI9_CAEEL	Q8T3E0_CAEEL	Q9XVR7_CAEEL	G5EBZ1_CAEEL
biological_process	GO:0048557	embryonic digestive tract morphogenesis	6	25	0.24	0.746554	0.419781	1	1	LIN36_CAEEL	MOM4_CAEEL	APR1_CAEEL	MIG5_CAEEL	G5EGL5_CAEEL	Q7YXC4_CAEEL
molecular_function	GO:0030553	cGMP binding	6	12	0.5	0.999029	0.00628164	1	0.955	CNG_CAEEL	EGL4_CAEEL	O61827_CAEEL	U4PEQ9_CAEEL	Q9N4C1_CAEEL	U4PRL6_CAEEL
cellular_component	GO:0016282	eukaryotic 43S preinitiation complex	6	16	0.375	0.995921	0.0182763	1	0.992	EIF3D_CAEEL	EIF3L_CAEEL	EIF3I_CAEEL	A0A1N7SYP6_CAEEL	A0A1N7SYR1_CAEEL	A0A1N7SYP7_CAEEL
cellular_component	GO:0033290	eukaryotic 48S preinitiation complex	6	16	0.375	0.995921	0.0182763	1	0.992	EIF3D_CAEEL	EIF3L_CAEEL	EIF3I_CAEEL	A0A1N7SYP6_CAEEL	A0A1N7SYR1_CAEEL	A0A1N7SYP7_CAEEL
biological_process	GO:0001732	formation of cytoplasmic translation initiation complex	6	17	0.352941	0.985044	0.0511719	1	1	EIF3D_CAEEL	EIF3L_CAEEL	EIF3I_CAEEL	A0A1N7SYP6_CAEEL	A0A1N7SYR1_CAEEL	A0A1N7SYP7_CAEEL
biological_process	GO:0017148	negative regulation of translation	6	46	0.130435	0.274203	0.813658	1	1	LIN41_CAEEL	NCL1_CAEEL	CGH1_CAEEL	CNOT1_CAEEL	GLD1_CAEEL	Q23191_CAEEL
molecular_function	GO:0004683	calmodulin-dependent protein kinase activity	6	10	0.6	0.999029	0.00628164	1	0.955	MAK1_CAEEL	KCC2D_CAEEL	F5GUA8_CAEEL	G5EDZ5_CAEEL	F5GUA9_CAEEL	E7EM33_CAEEL
cellular_component	GO:0000151	ubiquitin ligase complex	6	39	0.153846	0.852628	0.202929	1	1	DRE1_CAEEL	RING2_CAEEL	UBR1_CAEEL	UBE4_CAEEL	Q9NA71_CAEEL	A0A0K3AS68_CAEEL
biological_process	GO:0007416	synapse assembly	6	15	0.4	0.993222	0.0155961	1	1	LIDB1_CAEEL	SYG1_CAEEL	SYG2_CAEEL	UNC4_CAEEL	Q9U3E2_CAEEL	H2KYW1_CAEEL
biological_process	GO:0090307	mitotic spindle assembly	6	19	0.315789	0.999989	4.88836e-05	1	0.043	CLAP3_CAEEL	CLAS2_CAEEL	G5EFM0_CAEEL	G5EDA3_CAEEL	G5ECC0_CAEEL	P91400_CAEEL
biological_process	GO:0010506	regulation of autophagy	6	23	0.26087	0.991752	0.0185352	1	1	IKKE1_CAEEL	Q68TI8_CAEEL	G5EF88_CAEEL	S6F588_CAEEL	G5EEV7_CAEEL	S6FD39_CAEEL
molecular_function	GO:0001671	ATPase activator activity	6	15	0.4	0.994925	0.0221866	1	1	O61980_CAEEL	K8F7X5_CAEEL	Q9NA35_CAEEL	Q9XUG9_CAEEL	D3NQB3_CAEEL	K8ESJ1_CAEEL
cellular_component	GO:0071944	cell periphery	6	13	0.461538	1	5.1783e-11	1	0	CBD1_CAEEL	ROL3_CAEEL	PAR1_CAEEL	O01847_CAEEL	Q21430_CAEEL	A0A1I6CM53_CAEEL
biological_process	GO:0007568	aging	6	16	0.375	0.831293	0.209799	1	1	FOXO_CAEEL	HM22_CAEEL	GRH1_CAEEL	MXL3_CAEEL	HLH11_CAEEL	MDL1_CAEEL
biological_process	GO:0055088	lipid homeostasis	6	28	0.214286	0.754042	0.397685	1	1	FLD1_CAEEL	ABH52_CAEEL	ACX14_CAEEL	ACX15_CAEEL	ACX12_CAEEL	ACX13_CAEEL
molecular_function	GO:0000166	nucleotide binding	6	44	0.136364	0.998547	0.00180282	1	0.538	W6SBC4_CAEEL	Q9U2B5_CAEEL	Q0PDK5_CAEEL	O62218_CAEEL	W6RQW7_CAEEL	F5GU77_CAEEL
molecular_function	GO:0016286	small conductance calcium-activated potassium channel activity	6	20	0.3	0.970399	0.0853393	1	1	G5ED53_CAEEL	G5EFI1_CAEEL	G5EER9_CAEEL	G5EEZ9_CAEEL	G5EDG3_CAEEL	Q8I4D2_CAEEL
molecular_function	GO:0017151	DEAD/H-box RNA helicase binding	6	19	0.315789	0.977779	0.0686177	1	1	FOXO_CAEEL	ERGO1_CAEEL	MEP1_CAEEL	ZYX_CAEEL	2AAA_CAEEL	Q19818_CAEEL
biological_process	GO:0008286	insulin receptor signaling pathway	6	14	0.428571	0.995153	0.0160257	1	1	FOXO_CAEEL	MXL3_CAEEL	EGL4_CAEEL	STX1A_CAEEL	AKT1_CAEEL	G5EDP9_CAEEL
biological_process	GO:0043065	positive regulation of apoptotic process	6	22	0.272727	0.802178	0.338827	1	1	FOXO_CAEEL	DAPK_CAEEL	DRE1_CAEEL	SPTF3_CAEEL	UNC3_CAEEL	Q9GUP2_CAEEL
biological_process	GO:0007614	short-term memory	6	18	0.333333	0.978993	0.0662542	1	1	FOXO_CAEEL	GAP2_CAEEL	ADD1_CAEEL	Q95XA9_CAEEL	G8JYB0_CAEEL	Q19523_CAEEL
biological_process	GO:0031047	gene silencing by RNA	6	29	0.206897	0.999578	0.000908354	1	0.646	DHX9_CAEEL	RPB9_CAEEL	CNOT1_CAEEL	Q9XVI3_CAEEL	G5EGR6_CAEEL	Q17493_CAEEL
molecular_function	GO:0060090	molecular adaptor activity	6	23	0.26087	0.973584	0.0437712	1	1	APC1_CAEEL	CNOT1_CAEEL	G5EF06_CAEEL	Q22342_CAEEL	Q21746_CAEEL	Q18983_CAEEL
biological_process	GO:0000902	cell morphogenesis	6	18	0.333333	1	4.14853e-09	1	0	CYFIP_CAEEL	PPN1_CAEEL	G5ECM5_CAEEL	Q5DX48_CAEEL	H2KZU6_CAEEL	Q22354_CAEEL
molecular_function	GO:0001653	peptide receptor activity	6	27	0.222222	0.0932959	0.933557	1	1	DAF11_CAEEL	GCY12_CAEEL	GCY1_CAEEL	GCY20_CAEEL	GCY23_CAEEL	GCY8_CAEEL
biological_process	GO:0006182	cGMP biosynthetic process	6	27	0.222222	0.8473	0.291766	1	1	DAF11_CAEEL	GCY12_CAEEL	GCY1_CAEEL	GCY20_CAEEL	GCY23_CAEEL	GCY8_CAEEL
biological_process	GO:0051179	localization	6	7	0.857143	1	4.48331e-13	1	0	ANC1_CAEEL	ZDHCS_CAEEL	G5ECZ1_CAEEL	Q7JP86_CAEEL	Q17490_CAEEL	Q8MQG0_CAEEL
cellular_component	GO:0016592	mediator complex	6	32	0.1875	0.840402	0.298392	1	1	MED13_CAEEL	MED8_CAEEL	MED14_CAEEL	MED29_CAEEL	MED12_CAEEL	MED15_CAEEL
biological_process	GO:0009880	embryonic pattern specification	6	14	0.428571	0.998291	0.0044691	1	0.985	GLP1_CAEEL	MBK2_CAEEL	SKN1_CAEEL	PAR1_CAEEL	G5EF15_CAEEL	G5ECB9_CAEEL
biological_process	GO:0005978	glycogen biosynthetic process	6	13	0.461538	0.978993	0.0662542	1	1	Q86D12_CAEEL	Q9XUS4_CAEEL	Q9XUS6_CAEEL	Q9XUS5_CAEEL	Q8WQE5_CAEEL	Q69Z13_CAEEL
biological_process	GO:0009791	post-embryonic development	6	36	0.166667	1	2.76596e-10	1	0	CCNE_CAEEL	PICAL_CAEEL	SMA4_CAEEL	G5EDL0_CAEEL	A0A4V6M3C5_CAEEL	A0A4V0IK80_CAEEL
molecular_function	GO:0015280	ligand-gated sodium channel activity	6	30	0.2	0.809665	0.341234	1	1	UN105_CAEEL	DEG1_CAEEL	G5EGI5_CAEEL	O01664_CAEEL	P91102_CAEEL	O45402_CAEEL
biological_process	GO:0042127	regulation of cell population proliferation	6	17	0.352941	0.984404	0.0332094	1	1	EPI1_CAEEL	STAT1_CAEEL	APTF1_CAEEL	G5EEV6_CAEEL	C1P640_CAEEL	C1P641_CAEEL
molecular_function	GO:0051010	microtubule plus-end binding	6	13	0.461538	0.998185	0.01011	1	0.997	ZYG9_CAEEL	Q23542_CAEEL	E2JKY8_CAEEL	E2JKZ0_CAEEL	L8EC32_CAEEL	L8E938_CAEEL
molecular_function	GO:0061608	nuclear import signal receptor activity	6	12	0.5	0.999029	0.00628164	1	0.955	IMA2_CAEEL	U4PBW7_CAEEL	Q20703_CAEEL	K8ERU5_CAEEL	L8E808_CAEEL	K8FDZ3_CAEEL
biological_process	GO:0060298	positive regulation of sarcomere organization	6	12	0.5	0.998682	0.00806187	1	0.997	PAT2_CAEEL	UNC89_CAEEL	UNC22_CAEEL	UNC52_CAEEL	MYSP_CAEEL	CPNA1_CAEEL
biological_process	GO:0061061	muscle structure development	6	10	0.6	1	1.2639e-06	1	0.001	PXL1_CAEEL	G5EEL1_CAEEL	G5EFG1_CAEEL	G5EFL5_CAEEL	G5EC72_CAEEL	G5EEF6_CAEEL
molecular_function	GO:0004649	poly(ADP-ribose) glycohydrolase activity	6	9	0.666667	0.999931	0.000880391	1	0.352	PARG1_CAEEL	A5JYS4_CAEEL	X5LVA3_CAEEL	X5M5W8_CAEEL	X5M907_CAEEL	L8EC33_CAEEL
cellular_component	GO:0005902	microvillus	6	10	0.6	0.999274	0.00407856	1	0.706	HUM6_CAEEL	G5EBK3_CAEEL	G5EES2_CAEEL	W6RRZ0_CAEEL	W6RY57_CAEEL	Q9TZI9_CAEEL
biological_process	GO:1905905	pharyngeal gland morphogenesis	6	18	0.333333	0.978993	0.0662542	1	1	ROCK_CAEEL	PQN8_CAEEL	UNC89_CAEEL	UNC52_CAEEL	HLH6_CAEEL	G5EFW3_CAEEL
biological_process	GO:0030307	positive regulation of cell growth	6	10	0.6	1	2.5674e-09	1	0	SMA4_CAEEL	Q68TI8_CAEEL	G5EF88_CAEEL	S6F588_CAEEL	G5EEV7_CAEEL	S6FD39_CAEEL
biological_process	GO:0045807	positive regulation of endocytosis	6	11	0.545455	0.999951	0.000195105	1	0.197	NBEA_CAEEL	NEKL2_CAEEL	Q9U3A6_CAEEL	Q8I4H0_CAEEL	Q8I4G9_CAEEL	A5JYR4_CAEEL
molecular_function	GO:0016810	hydrolase activity, acting on carbon-nitrogen (but not peptide) bonds	6	13	0.461538	0.92228	0.12041	1	1	A0A4V0IKS1_CAEEL	H2KZ94_CAEEL	A0A4V0INJ5_CAEEL	A0A4V0IM10_CAEEL	A0A4V0IND1_CAEEL	A0A4V0ILL1_CAEEL
cellular_component	GO:0098981	cholinergic synapse	6	7	0.857143	0.999999	5.0311e-05	1	0.014	G5EE26_CAEEL	Q14DX2_CAEEL	Q49HI3_CAEEL	A0A0K3AR90_CAEEL	A0A0K3ATN9_CAEEL	A0A0K3AWL6_CAEEL
cellular_component	GO:0098674	extrinsic component of neuronal dense core vesicle membrane	6	7	0.857143	0.999999	5.0311e-05	1	0.014	G5EE26_CAEEL	Q14DX2_CAEEL	Q49HI3_CAEEL	A0A0K3AR90_CAEEL	A0A0K3ATN9_CAEEL	A0A0K3AWL6_CAEEL
cellular_component	GO:0098982	GABA-ergic synapse	6	7	0.857143	0.999999	5.0311e-05	1	0.014	G5EE26_CAEEL	Q14DX2_CAEEL	Q49HI3_CAEEL	A0A0K3AR90_CAEEL	A0A0K3ATN9_CAEEL	A0A0K3AWL6_CAEEL
biological_process	GO:0099161	regulation of presynaptic dense core granule exocytosis	6	7	0.857143	0.999996	0.000131019	1	0.142	G5EE26_CAEEL	Q14DX2_CAEEL	Q49HI3_CAEEL	A0A0K3AR90_CAEEL	A0A0K3ATN9_CAEEL	A0A0K3AWL6_CAEEL
biological_process	GO:0099148	regulation of synaptic vesicle docking	6	7	0.857143	0.999996	0.000131019	1	0.142	G5EE26_CAEEL	Q14DX2_CAEEL	Q49HI3_CAEEL	A0A0K3AR90_CAEEL	A0A0K3ATN9_CAEEL	A0A0K3AWL6_CAEEL
biological_process	GO:0010807	regulation of synaptic vesicle priming	6	7	0.857143	0.999996	0.000131019	1	0.142	G5EE26_CAEEL	Q14DX2_CAEEL	Q49HI3_CAEEL	A0A0K3AR90_CAEEL	A0A0K3ATN9_CAEEL	A0A0K3AWL6_CAEEL
biological_process	GO:0009605	response to external stimulus	6	8	0.75	0.999731	0.000371686	1	0.301	Q7JP86_CAEEL	V6CLS7_CAEEL	V6CLR6_CAEEL	W6SBC4_CAEEL	W6RQW7_CAEEL	W6RTC2_CAEEL
biological_process	GO:0034472	snRNA 3'-end processing	6	12	0.5	0.971936	0.0761285	1	1	E5QCH1_CAEEL	H2KZC8_CAEEL	O45075_CAEEL	Q86MG4_CAEEL	B7WN63_CAEEL	Q23271_CAEEL
biological_process	GO:0042058	regulation of epidermal growth factor receptor signaling pathway	6	8	0.75	1	7.76899e-07	1	0.001	Q17687_CAEEL	Q9U2S3_CAEEL	A0A0K3AXE4_CAEEL	A0A0K3AS30_CAEEL	H2KML1_CAEEL	Q9U2V5_CAEEL
molecular_function	GO:0003983	UTP:glucose-1-phosphate uridylyltransferase activity	6	7	0.857143	0.999997	9.81751e-05	1	0.044	Q86D12_CAEEL	Q9XUS4_CAEEL	Q9XUS6_CAEEL	Q9XUS5_CAEEL	Q8WQE5_CAEEL	Q69Z13_CAEEL
biological_process	GO:0006011	UDP-glucose metabolic process	6	7	0.857143	0.999996	0.000131019	1	0.142	Q86D12_CAEEL	Q9XUS4_CAEEL	Q9XUS6_CAEEL	Q9XUS5_CAEEL	Q8WQE5_CAEEL	Q69Z13_CAEEL
biological_process	GO:0050920	regulation of chemotaxis	5	22	0.227273	0.999944	0.000159874	1	0.173	PDPK1_CAEEL	DAF11_CAEEL	DAF25_CAEEL	CHE1_CAEEL	Q0PCD8_CAEEL
biological_process	GO:0045727	positive regulation of translation	5	14	0.357143	0.773503	0.387587	1	1	PHA4_CAEEL	LARP1_CAEEL	TOR_CAEEL	MXT_CAEEL	GUF1_CAEEL
cellular_component	GO:0005802	trans-Golgi network	5	46	0.108696	0.620823	0.530016	1	1	PAD1_CAEEL	BLI4_CAEEL	Q9TXV2_CAEEL	Q8I7G0_CAEEL	U4PBV8_CAEEL
molecular_function	GO:0004722	protein serine/threonine phosphatase activity	5	55	0.0909091	0.0345752	0.986029	0.999	1	CDC14_CAEEL	Q21840_CAEEL	Q9U395_CAEEL	Q27501_CAEEL	Q09598_CAEEL
biological_process	GO:0070482	response to oxygen levels	5	18	0.277778	0.784016	0.351032	1	1	PDE1_CAEEL	CNG_CAEEL	EGL4_CAEEL	RT4I1_CAEEL	GCY35_CAEEL
biological_process	GO:0007189	adenylate cyclase-activating G protein-coupled receptor signaling pathway	5	15	0.333333	0.708234	0.480518	1	1	LPLT1_CAEEL	LPLT2_CAEEL	Q19931_CAEEL	Q19523_CAEEL	G5EE33_CAEEL
cellular_component	GO:0031252	cell leading edge	5	11	0.454545	1	8.16784e-07	1	0	PLX2_CAEEL	ROL3_CAEEL	ANI1_CAEEL	G5EG53_CAEEL	H2L0C7_CAEEL
cellular_component	GO:0002116	semaphorin receptor complex	5	7	0.714286	0.99995	0.000942533	1	0.251	PLX2_CAEEL	U4PF39_CAEEL	U4PRY7_CAEEL	Q3V5K0_CAEEL	U4PBW0_CAEEL
molecular_function	GO:0017154	semaphorin receptor activity	5	9	0.555556	0.99912	0.00731871	1	0.971	PLX2_CAEEL	U4PF39_CAEEL	U4PRY7_CAEEL	Q3V5K0_CAEEL	U4PBW0_CAEEL
biological_process	GO:1902287	semaphorin-plexin signaling pathway involved in axon guidance	5	7	0.714286	0.999869	0.00203667	1	0.87	PLX2_CAEEL	U4PF39_CAEEL	U4PRY7_CAEEL	Q3V5K0_CAEEL	U4PBW0_CAEEL
biological_process	GO:0007052	mitotic spindle organization	5	25	0.2	0.999905	0.000267417	1	0.223	RSA2_CAEEL	SPD5_CAEEL	NUF2_CAEEL	ZYG9_CAEEL	2AAA_CAEEL
biological_process	GO:0035262	gonad morphogenesis	5	44	0.113636	0.209907	0.888116	1	1	HLH2_CAEEL	HM22_CAEEL	G5EG53_CAEEL	Q21430_CAEEL	Q9XVI2_CAEEL
biological_process	GO:0048015	phosphatidylinositol-mediated signaling	5	11	0.454545	0.948828	0.141385	1	1	PLCE1_CAEEL	PIKI1_CAEEL	Q8IA75_CAEEL	Q9XW63_CAEEL	Q8IA76_CAEEL
cellular_component	GO:0070090	metaphase plate	5	8	0.625	0.999823	0.00221866	1	0.475	SEP1_CAEEL	GEI17_CAEEL	G5EBQ3_CAEEL	Q27GU1_CAEEL	H2KZD5_CAEEL
biological_process	GO:0034613	cellular protein localization	5	20	0.25	0.999917	0.000124638	1	0.103	SEP1_CAEEL	LRK1_CAEEL	NPP5_CAEEL	UNC89_CAEEL	ZYG1_CAEEL
biological_process	GO:0045977	positive regulation of mitotic cell cycle, embryonic	5	9	0.555556	0.998844	0.00908938	1	0.999	SPD5_CAEEL	SZY20_CAEEL	ZYG1_CAEEL	ATX2_CAEEL	Q21295_CAEEL
molecular_function	GO:0000993	RNA polymerase II complex binding	5	21	0.238095	0.939022	0.1473	1	1	SIG7_CAEEL	CIDS1_CAEEL	CTR9_CAEEL	Q1XFY2_CAEEL	Q9TZM9_CAEEL
biological_process	GO:0002098	tRNA wobble uridine modification	5	19	0.263158	0.87486	0.267834	1	1	H2L2B2_CAEEL	H2L2B3_CAEEL	Q8I4I7_CAEEL	Q20453_CAEEL	Q7YTV3_CAEEL
cellular_component	GO:0005930	axoneme	5	25	0.2	0.870879	0.24381	1	1	DYHC2_CAEEL	BBS1_CAEEL	YAP1_CAEEL	CFA36_CAEEL	ARL6_CAEEL
biological_process	GO:0097120	receptor localization to synapse	5	8	0.625	0.999895	0.000677979	1	0.516	LIN10_CAEEL	UNC50_CAEEL	DLG1_CAEEL	ADD1_CAEEL	G8JYB0_CAEEL
biological_process	GO:0040040	thermosensory behavior	5	15	0.333333	0.972161	0.0909571	1	1	CNG_CAEEL	RCANL_CAEEL	GCY23_CAEEL	GCY8_CAEEL	Q9U2Z0_CAEEL
biological_process	GO:0009957	epidermal cell fate specification	5	11	0.454545	0.99531	0.0248695	1	1	LIN41_CAEEL	ELT1_CAEEL	H9G2S6_CAEEL	Q3S1J8_CAEEL	H9G2S7_CAEEL
molecular_function	GO:0003684	damaged DNA binding	5	23	0.217391	0.8527	0.299295	1	1	SMC6_CAEEL	UBQL_CAEEL	Q8T3E0_CAEEL	Q9U2D2_CAEEL	G5EBZ1_CAEEL
biological_process	GO:0009306	protein secretion	5	20	0.25	0.996037	0.0108237	1	1	YC2L_CAEEL	Q9U3A6_CAEEL	Q8I4H0_CAEEL	Q8I4G9_CAEEL	A5JYR4_CAEEL
biological_process	GO:0032228	regulation of synaptic transmission, GABAergic	5	15	0.333333	0.825275	0.338356	1	1	RAC1_CAEEL	G5EBV3_CAEEL	Q7KPP4_CAEEL	Q8IA75_CAEEL	Q8IA76_CAEEL
biological_process	GO:0007163	establishment or maintenance of cell polarity	5	27	0.185185	0.999948	0.000117622	1	0.096	RAC1_CAEEL	PAR3_CAEEL	EGL27_CAEEL	PAR1_CAEEL	Q19739_CAEEL
biological_process	GO:0048812	neuron projection morphogenesis	5	14	0.357143	1	2.54747e-08	1	0	RAC1_CAEEL	CNG_CAEEL	SULU_CAEEL	G5EBV3_CAEEL	Q9XUT0_CAEEL
molecular_function	GO:0019888	protein phosphatase regulator activity	5	15	0.333333	0.541803	0.630333	1	1	2AAA_CAEEL	A0A1N7SYT5_CAEEL	A0A1N7SYW5_CAEEL	Q17744_CAEEL	H8W3X6_CAEEL
biological_process	GO:0040001	establishment of mitotic spindle localization	5	16	0.3125	0.997281	0.00588645	1	0.996	PAR3_CAEEL	CNOT1_CAEEL	CLAP3_CAEEL	CLAS2_CAEEL	ATX2_CAEEL
cellular_component	GO:0031902	late endosome membrane	5	34	0.147059	0.541041	0.644107	1	1	GOSR2_CAEEL	VPS18_CAEEL	O44158_CAEEL	Q17687_CAEEL	Q9XWI0_CAEEL
biological_process	GO:0035418	protein localization to synapse	5	22	0.227273	0.949478	0.104549	1	1	SYG2_CAEEL	G5EDQ4_CAEEL	G5EDV5_CAEEL	G5EGA4_CAEEL	G5EF89_CAEEL
biological_process	GO:0048488	synaptic vesicle endocytosis	5	13	0.384615	0.999625	0.00219261	1	0.885	PICAL_CAEEL	STNB_CAEEL	CLA1_CAEEL	Q9BIF4_CAEEL	A0A0K3AWP8_CAEEL
cellular_component	GO:0070382	exocytic vesicle	5	21	0.238095	0.971691	0.0537991	1	1	CLA1_CAEEL	G5EDP5_CAEEL	Q23056_CAEEL	Q8I4L8_CAEEL	G5EFC6_CAEEL
cellular_component	GO:0030672	synaptic vesicle membrane	5	18	0.277778	0.885485	0.248414	1	1	UNC13_CAEEL	SYB1_CAEEL	CLA1_CAEEL	H2KZJ6_CAEEL	E9P851_CAEEL
biological_process	GO:0017156	calcium-ion regulated exocytosis	5	20	0.25	1	1.01075e-08	1	0	CLA1_CAEEL	G5EDP5_CAEEL	Q23056_CAEEL	Q8I4L8_CAEEL	G5EFC6_CAEEL
biological_process	GO:0017158	regulation of calcium ion-dependent exocytosis	5	19	0.263158	0.999553	0.00186042	1	0.825	CLA1_CAEEL	G5EDP5_CAEEL	Q23056_CAEEL	Q8I4L8_CAEEL	G5EFC6_CAEEL
biological_process	GO:0014059	regulation of dopamine secretion	5	19	0.263158	0.87486	0.267834	1	1	CLA1_CAEEL	G5EDP5_CAEEL	Q23056_CAEEL	Q8I4L8_CAEEL	G5EFC6_CAEEL
biological_process	GO:0001714	endodermal cell fate specification	5	17	0.294118	0.933746	0.170281	1	1	SKN1_CAEEL	MOM4_CAEEL	NLK_CAEEL	APR1_CAEEL	MIG5_CAEEL
cellular_component	GO:0016529	sarcoplasmic reticulum	5	25	0.2	1	2.27923e-07	1	0	PTP1_CAEEL	Q7YXD9_CAEEL	G5EBP0_CAEEL	Q20155_CAEEL	I2HAA6_CAEEL
molecular_function	GO:0004402	histone acetyltransferase activity	5	27	0.185185	0.56737	0.621831	1	1	TAF1_CAEEL	K8F7U3_CAEEL	K8ES81_CAEEL	K8ERR8_CAEEL	K8ESF3_CAEEL
biological_process	GO:0006260	DNA replication	5	43	0.116279	0.272666	0.803629	1	1	SPT16_CAEEL	DHX9_CAEEL	NFI1_CAEEL	SMC6_CAEEL	RIR1_CAEEL
biological_process	GO:0040035	hermaphrodite genitalia development	5	19	0.263158	0.824042	0.32335	1	1	MEP1_CAEEL	SMG1_CAEEL	ANI1_CAEEL	G5EES3_CAEEL	G5EGR6_CAEEL
biological_process	GO:0046622	positive regulation of organ growth	5	8	0.625	0.999551	0.0046822	1	0.99	SMA4_CAEEL	G5EC35_CAEEL	G5EFW3_CAEEL	G5EG97_CAEEL	G5EBH3_CAEEL
biological_process	GO:0048337	positive regulation of mesodermal cell fate specification	5	10	0.5	0.997518	0.0156969	1	1	SEM2_CAEEL	FOZI1_CAEEL	SMA9_CAEEL	MYOD1_CAEEL	Q9XVI2_CAEEL
biological_process	GO:0000724	double-strand break repair via homologous recombination	5	35	0.142857	0.314418	0.797193	1	1	SMC6_CAEEL	WRN_CAEEL	Q9U2S8_CAEEL	D3NQA7_CAEEL	G5EBZ1_CAEEL
cellular_component	GO:0005681	spliceosomal complex	5	37	0.135135	0.0474338	0.975209	0.997	1	CWC22_CAEEL	DHX15_CAEEL	GPKOW_CAEEL	CATIN_CAEEL	Q93339_CAEEL
molecular_function	GO:0004984	olfactory receptor activity	5	27	0.185185	0.00221475	0.998957	0.302	1	SRA10_CAEEL	SRA11_CAEEL	SRA9_CAEEL	SRA12_CAEEL	Q3Y412_CAEEL
biological_process	GO:0016082	synaptic vesicle priming	5	10	0.5	0.999962	0.000352352	1	0.282	RIM_CAEEL	UNC13_CAEEL	G5EE26_CAEEL	Q14DX2_CAEEL	Q49HI3_CAEEL
biological_process	GO:0000956	nuclear-transcribed mRNA catabolic process	5	24	0.208333	0.504322	0.603177	1	1	RENT1_CAEEL	CNOT1_CAEEL	Q9U2B5_CAEEL	U4PRA5_CAEEL	Q17740_CAEEL
biological_process	GO:0000184	nuclear-transcribed mRNA catabolic process, nonsense-mediated decay	5	25	0.2	0.8473	0.291766	1	1	RENT1_CAEEL	SMG1_CAEEL	Q1T6W7_CAEEL	U4PRA5_CAEEL	Q9BL68_CAEEL
biological_process	GO:0006261	DNA-dependent DNA replication	5	11	0.454545	0.428278	0.683965	1	1	DPOE2_CAEEL	DPOLQ_CAEEL	Q20129_CAEEL	Q18547_CAEEL	Q19520_CAEEL
biological_process	GO:0030516	regulation of axon extension	5	18	0.277778	0.999991	2.89334e-05	1	0.032	CNG_CAEEL	DAF11_CAEEL	G5EDQ5_CAEEL	A7LPF8_CAEEL	Q9U377_CAEEL
cellular_component	GO:0016010	dystrophin-associated glycoprotein complex	5	12	0.416667	0.999444	0.00286904	1	0.626	DMD_CAEEL	DYC1_CAEEL	V6CLV8_CAEEL	V6CLR8_CAEEL	V6CJD7_CAEEL
cellular_component	GO:0005852	eukaryotic translation initiation factor 3 complex	5	16	0.3125	0.987798	0.0426005	1	1	EIF3D_CAEEL	EIF3L_CAEEL	A0A1N7SYP6_CAEEL	A0A1N7SYR1_CAEEL	A0A1N7SYP7_CAEEL
cellular_component	GO:0014069	postsynaptic density	5	16	0.3125	0.957399	0.121362	1	1	ADD1_CAEEL	ADD2_CAEEL	G8JYB0_CAEEL	Q9XUT0_CAEEL	H2KYW1_CAEEL
biological_process	GO:0000422	autophagy of mitochondrion	5	25	0.2	0.72866	0.427165	1	1	LGG2_CAEEL	ATG2_CAEEL	Q22342_CAEEL	A0A3P6NNZ8_CAEEL	A0A3P6MYF5_CAEEL
biological_process	GO:0050807	regulation of synapse organization	5	21	0.238095	0.99483	0.0119518	1	1	RPM1_CAEEL	CEH28_CAEEL	G5EDQ5_CAEEL	A7LPF8_CAEEL	Q9U377_CAEEL
cellular_component	GO:0005875	microtubule associated complex	5	9	0.555556	1	9.55832e-08	1	0	Q23542_CAEEL	E2JKY8_CAEEL	E2JKZ0_CAEEL	L8EC32_CAEEL	L8E938_CAEEL
molecular_function	GO:0009931	calcium-dependent protein serine/threonine kinase activity	5	7	0.714286	0.999335	0.00306727	1	0.763	MAK1_CAEEL	F5GUA8_CAEEL	G5EDZ5_CAEEL	F5GUA9_CAEEL	E7EM33_CAEEL
molecular_function	GO:0070006	metalloaminopeptidase activity	5	24	0.208333	0.828504	0.332926	1	1	PSA_CAEEL	AMP2_CAEEL	Q566A9_CAEEL	H2L0M5_CAEEL	A8W765_CAEEL
biological_process	GO:0061065	regulation of dauer larval development	5	15	0.333333	0.987418	0.0292918	1	1	DAF14_CAEEL	FOXO_CAEEL	DAF11_CAEEL	DAF25_CAEEL	IF122_CAEEL
biological_process	GO:0003384	apical constriction involved in gastrulation	5	5	1	1	0.000130784	1	0.127	HMR1_CAEEL	Q53U86_CAEEL	Q53U87_CAEEL	Q4PIU9_CAEEL	Q18100_CAEEL
biological_process	GO:0042073	intraciliary transport	5	20	0.25	0.966089	0.0829255	1	1	DYF2_CAEEL	OSM3_CAEEL	TTC30_CAEEL	G5ED37_CAEEL	Q18263_CAEEL
molecular_function	GO:0038023	signaling receptor activity	5	38	0.131579	4.18186e-05	0.999971	0.006	1	TRA2_CAEEL	CL161_CAEEL	G5EEH3_CAEEL	E0AHC1_CAEEL	Q9N536_CAEEL
molecular_function	GO:0042277	peptide binding	5	35	0.142857	0.237172	0.851053	1	1	PSA_CAEEL	AMP2_CAEEL	Q566A9_CAEEL	H2L0M5_CAEEL	A8W765_CAEEL
biological_process	GO:0009966	regulation of signal transduction	5	16	0.3125	0.999842	0.000244996	1	0.22	MELT_CAEEL	G5ECV3_CAEEL	S6EZQ4_CAEEL	S6FN15_CAEEL	S6FWQ0_CAEEL
molecular_function	GO:0005254	chloride channel activity	5	48	0.104167	0.102994	0.948882	1	1	BST17_CAEEL	Q18303_CAEEL	O16779_CAEEL	C0P286_CAEEL	G5EBW3_CAEEL
molecular_function	GO:0140297	DNA-binding transcription factor binding	5	16	0.3125	0.998855	0.00300951	1	0.757	LIDB1_CAEEL	FOXO_CAEEL	G5EGE2_CAEEL	Q93616_CAEEL	A7LPI4_CAEEL
cellular_component	GO:0016281	eukaryotic translation initiation factor 4F complex	5	10	0.5	0.998974	0.00779205	1	0.887	Q7JMF0_CAEEL	A0A486WX07_CAEEL	B5BM24_CAEEL	B5BM23_CAEEL	Q21531_CAEEL
biological_process	GO:0019674	NAD metabolic process	5	6	0.833333	0.997518	0.0156969	1	1	KMO_CAEEL	Q9XXI6_CAEEL	B5BM30_CAEEL	Q9XXI5_CAEEL	Q21794_CAEEL
cellular_component	GO:1990023	mitotic spindle midzone	5	10	0.5	0.998974	0.00779205	1	0.887	CDC14_CAEEL	G5EC43_CAEEL	G5EG83_CAEEL	Q8MQ04_CAEEL	Q8MQ03_CAEEL
cellular_component	GO:0005868	cytoplasmic dynein complex	5	20	0.25	0.94622	0.143889	1	1	DYHC2_CAEEL	DYHC_CAEEL	O45087_CAEEL	Q18263_CAEEL	A0A486WV95_CAEEL
molecular_function	GO:0008569	minus-end-directed microtubule motor activity	5	5	1	1	0.000102138	1	0.059	DYHC2_CAEEL	DYHC_CAEEL	A0A163VTS9_CAEEL	G5EDV4_CAEEL	P91400_CAEEL
cellular_component	GO:0010494	cytoplasmic stress granule	5	24	0.208333	0.885485	0.248414	1	1	LARP1_CAEEL	RLE1_CAEEL	CGH1_CAEEL	ATX2_CAEEL	Q22308_CAEEL
biological_process	GO:0007417	central nervous system development	5	11	0.454545	0.997663	0.00878064	1	0.999	Q9U2M6_CAEEL	Q7K714_CAEEL	Q94178_CAEEL	P91547_CAEEL	Q7JNM3_CAEEL
biological_process	GO:0050921	positive regulation of chemotaxis	5	8	0.625	0.999841	0.00131787	1	0.769	CHE1_CAEEL	EGL4_CAEEL	ADR1_CAEEL	G5ED37_CAEEL	P90732_CAEEL
biological_process	GO:0043282	pharyngeal muscle development	5	12	0.416667	0.991938	0.0368749	1	1	GLP1_CAEEL	HM22_CAEEL	TBX35_CAEEL	G5EBM0_CAEEL	G5ECA1_CAEEL
biological_process	GO:1904070	ascaroside biosynthetic process	5	12	0.416667	0.991938	0.0368749	1	1	HSF1_CAEEL	ACS7_CAEEL	ACX14_CAEEL	ACX12_CAEEL	ACX13_CAEEL
molecular_function	GO:0008574	plus-end-directed microtubule motor activity	5	9	0.555556	0.99912	0.00731871	1	0.971	OSM3_CAEEL	G5EC43_CAEEL	G5EG83_CAEEL	Q8MQ04_CAEEL	Q8MQ03_CAEEL
biological_process	GO:0036065	fucosylation	5	21	0.238095	0.769111	0.410044	1	1	FUT8_CAEEL	FUTA_CAEEL	G5EGL5_CAEEL	Q7YXC4_CAEEL	O17552_CAEEL
biological_process	GO:0007616	long-term memory	5	9	0.555556	0.998844	0.00908938	1	0.999	GAP2_CAEEL	ADD1_CAEEL	Q95XA9_CAEEL	G8JYB0_CAEEL	D3YT29_CAEEL
biological_process	GO:0007160	cell-matrix adhesion	5	12	0.416667	0.999808	0.00128356	1	0.74	MUA3_CAEEL	YMS5_CAEEL	YAO6_CAEEL	YF1M_CAEEL	DEX1_CAEEL
biological_process	GO:0042078	germ-line stem cell division	5	12	0.416667	0.991938	0.0368749	1	1	MES2_CAEEL	CUL2_CAEEL	CWC22_CAEEL	A16L2_CAEEL	P90786_CAEEL
biological_process	GO:0007265	Ras protein signal transduction	5	19	0.263158	1	8.42576e-08	1	0	KRAF1_CAEEL	PAC1_CAEEL	G5EGD8_CAEEL	G5EDU4_CAEEL	G5EE70_CAEEL
cellular_component	GO:0035371	microtubule plus-end	5	11	0.454545	0.998014	0.0126308	1	0.983	Q23542_CAEEL	E2JKY8_CAEEL	E2JKZ0_CAEEL	L8EC32_CAEEL	L8E938_CAEEL
cellular_component	GO:0080008	Cul4-RING E3 ubiquitin ligase complex	5	14	0.357143	0.966999	0.100635	1	1	DCA11_CAEEL	Q7JLF4_CAEEL	L8E955_CAEEL	Q21934_CAEEL	L8EC35_CAEEL
biological_process	GO:0007266	Rho protein signal transduction	5	25	0.2	0.99997	0.000106589	1	0.09	ROCK_CAEEL	PAC1_CAEEL	I1W6S5_CAEEL	S6EZU2_CAEEL	Q22354_CAEEL
molecular_function	GO:0004181	metallocarboxypeptidase activity	5	24	0.208333	0.828504	0.332926	1	1	CBPC6_CAEEL	GCP2_CAEEL	CBPC1_CAEEL	CBPE_CAEEL	G5EC96_CAEEL
molecular_function	GO:0030544	Hsp70 protein binding	5	14	0.357143	0.984658	0.0583692	1	1	SKN1_CAEEL	U4PBW7_CAEEL	K8ERU5_CAEEL	L8E808_CAEEL	K8FDZ3_CAEEL
cellular_component	GO:0005881	cytoplasmic microtubule	5	14	0.357143	0.999676	0.00135822	1	0.315	DYHC_CAEEL	CLAP3_CAEEL	CLAS2_CAEEL	Q8MQ20_CAEEL	Q20888_CAEEL
molecular_function	GO:0030971	receptor tyrosine kinase binding	5	18	0.277778	0.914661	0.203145	1	1	CED2_CAEEL	Q19019_CAEEL	Q95XA9_CAEEL	Q95ZR5_CAEEL	X5LX81_CAEEL
molecular_function	GO:0032050	clathrin heavy chain binding	5	6	0.833333	0.999984	0.000531644	1	0.223	PICAL_CAEEL	Q9U3A6_CAEEL	Q8I4H0_CAEEL	Q8I4G9_CAEEL	A5JYR4_CAEEL
biological_process	GO:0070593	dendrite self-avoidance	5	15	0.333333	0.972161	0.0909571	1	1	RIG6_CAEEL	Q19128_CAEEL	Q53U87_CAEEL	Q8MQ86_CAEEL	Q8T3E5_CAEEL
biological_process	GO:0036093	germ cell proliferation	5	14	0.357143	0.993741	0.0213569	1	1	A16L2_CAEEL	Q21126_CAEEL	Q20129_CAEEL	Q9TZK8_CAEEL	Q9TXM1_CAEEL
cellular_component	GO:0005778	peroxisomal membrane	5	23	0.217391	0.777776	0.396176	1	1	PEX13_CAEEL	G5ED99_CAEEL	Q18426_CAEEL	Q7JM90_CAEEL	Q93930_CAEEL
cellular_component	GO:0030140	trans-Golgi network transport vesicle	5	6	0.833333	0.993907	0.024922	1	1	IDA1_CAEEL	LIN10_CAEEL	O18302_CAEEL	Q564T0_CAEEL	A5JYY2_CAEEL
molecular_function	GO:0016747	acyltransferase activity, transferring groups other than amino-acyl groups	5	72	0.0694444	0.00281189	0.998507	0.377	1	G5EBI1_CAEEL	Q9UAT2_CAEEL	A0A0K3ASI3_CAEEL	O45283_CAEEL	O45282_CAEEL
biological_process	GO:0030335	positive regulation of cell migration	5	10	0.5	0.985663	0.0353371	1	1	UNC53_CAEEL	CATIN_CAEEL	G5EEU6_CAEEL	C8JQR2_CAEEL	G5EBX1_CAEEL
cellular_component	GO:0031932	TORC2 complex	5	8	0.625	0.999823	0.00221866	1	0.475	SMG1_CAEEL	TOR_CAEEL	G5ED67_CAEEL	G5EFK2_CAEEL	G5EFN2_CAEEL
biological_process	GO:0045747	positive regulation of Notch signaling pathway	5	18	0.277778	0.933746	0.170281	1	1	SEL5_CAEEL	MED29_CAEEL	G5EBN5_CAEEL	G5EGS7_CAEEL	H8ESG1_CAEEL
biological_process	GO:0010824	regulation of centrosome duplication	5	9	0.555556	0.972161	0.0909571	1	1	SZY20_CAEEL	ZYG1_CAEEL	ATX2_CAEEL	B2D6L4_CAEEL	Q565A8_CAEEL
biological_process	GO:0043484	regulation of RNA splicing	5	11	0.454545	0.751671	0.352747	1	1	SYM2_CAEEL	Q8MXR2_CAEEL	H2KZN0_CAEEL	Q9U304_CAEEL	Q9BIB7_CAEEL
biological_process	GO:0071902	positive regulation of protein serine/threonine kinase activity	5	9	0.555556	0.980606	0.0699177	1	1	Q68TI8_CAEEL	G5EF88_CAEEL	S6F588_CAEEL	G5EEV7_CAEEL	S6FD39_CAEEL
molecular_function	GO:0034237	protein kinase A regulatory subunit binding	5	7	0.714286	0.999902	0.00161532	1	0.526	AKAP1_CAEEL	A0A2K5ATU5_CAEEL	A0A2K5ATU1_CAEEL	A0A2K5ATV3_CAEEL	Q17636_CAEEL
biological_process	GO:0070816	phosphorylation of RNA polymerase II C-terminal domain	5	12	0.416667	0.997807	0.0102546	1	1	CDK12_CAEEL	K8F7X5_CAEEL	Q9NA35_CAEEL	D3NQB3_CAEEL	K8ESJ1_CAEEL
cellular_component	GO:0001726	ruffle	5	9	0.555556	0.999534	0.00440888	1	0.749	G5EGK1_CAEEL	A0A0K3AQU9_CAEEL	A0A0K3ATT6_CAEEL	Q3V5K0_CAEEL	Q95XN3_CAEEL
biological_process	GO:0071230	cellular response to amino acid stimulus	5	12	0.416667	0.980606	0.0699177	1	1	Q68TI8_CAEEL	G5EF88_CAEEL	S6F588_CAEEL	G5EEV7_CAEEL	S6FD39_CAEEL
cellular_component	GO:0030014	CCR4-NOT complex	5	17	0.294118	0.934446	0.153918	1	1	CNOT1_CAEEL	W6RTE4_CAEEL	Q9GYQ9_CAEEL	W6RRU8_CAEEL	W6SBC7_CAEEL
biological_process	GO:0022414	reproductive process	5	16	0.3125	1	2.00903e-08	1	0	Q20644_CAEEL	G8JY03_CAEEL	U4PRA5_CAEEL	O01598_CAEEL	A0A486WUJ5_CAEEL
molecular_function	GO:0003989	acetyl-CoA carboxylase activity	5	5	1	1	0.000102138	1	0.059	Q9GZI3_CAEEL	Q9XUC3_CAEEL	Q7KQ29_CAEEL	H2L0M0_CAEEL	C1P655_CAEEL
molecular_function	GO:0051371	muscle alpha-actinin binding	5	8	0.625	0.999661	0.00374187	1	0.837	G5EEL1_CAEEL	G5EFG1_CAEEL	G5EFL5_CAEEL	G5EC72_CAEEL	G5EEF6_CAEEL
biological_process	GO:0040019	positive regulation of embryonic development	4	23	0.173913	0.769111	0.410044	1	1	SEM2_CAEEL	H1UBJ1_CAEEL	Q9XWQ4_CAEEL	G5EBZ1_CAEEL
biological_process	GO:0008582	regulation of synaptic assembly at neuromuscular junction	4	12	0.333333	0.978993	0.0662542	1	1	PDPK1_CAEEL	FOXO_CAEEL	RPM1_CAEEL	AKT1_CAEEL
molecular_function	GO:0106306	protein serine/threonine phosphatase activity	4	58	0.0689655	NA	NA	NA	NA	Q21840_CAEEL	Q9U395_CAEEL	Q27501_CAEEL	A0A2C9C380_CAEEL
molecular_function	GO:0106307	protein serine/threonine phosphatase activity	4	58	0.0689655	NA	NA	NA	NA	Q21840_CAEEL	Q9U395_CAEEL	Q27501_CAEEL	A0A2C9C380_CAEEL
biological_process	GO:1902600	proton transmembrane transport	4	26	0.153846	0.123194	0.944258	1	1	VAS1_CAEEL	O16436_CAEEL	P90735_CAEEL	A0A131MBN3_CAEEL
molecular_function	GO:0004114	3',5'-cyclic-nucleotide phosphodiesterase activity	4	14	0.285714	0.969179	0.0972058	1	1	PDE1_CAEEL	PDE6_CAEEL	B5BM35_CAEEL	V6CIW4_CAEEL
biological_process	GO:1901046	positive regulation of oviposition	4	31	0.129032	0.389268	0.786532	1	1	SEM2_CAEEL	CYFIP_CAEEL	EGL4_CAEEL	Q21875_CAEEL
biological_process	GO:0060562	epithelial tube morphogenesis	4	9	0.444444	0.984303	0.0705661	1	1	EXC6_CAEEL	RIG6_CAEEL	GCK1_CAEEL	GCK3_CAEEL
biological_process	GO:0043547	positive regulation of GTPase activity	4	30	0.133333	0.859265	0.204364	1	1	RIC1_CAEEL	GCK1_CAEEL	Q9U364_CAEEL	Q23419_CAEEL
biological_process	GO:0030431	sleep	4	27	0.148148	0.452124	0.739326	1	1	FOXO_CAEEL	EGL4_CAEEL	APTF1_CAEEL	Q19523_CAEEL
biological_process	GO:0007166	cell surface receptor signaling pathway	4	19	0.210526	0.999368	0.000945407	1	0.649	LPLT1_CAEEL	LPLT2_CAEEL	Q19019_CAEEL	Q95ZR5_CAEEL
biological_process	GO:0006457	protein folding	4	78	0.0512821	2.08079e-05	0.999996	0.007	1	GRPE_CAEEL	ENPL1_CAEEL	Q18445_CAEEL	Q8IG33_CAEEL
biological_process	GO:1902667	regulation of axon guidance	4	9	0.444444	0.999296	0.0022936	1	0.891	PLX2_CAEEL	EFN4_CAEEL	VAB1_CAEEL	Q21875_CAEEL
biological_process	GO:0051726	regulation of cell cycle	4	25	0.16	0.979022	0.0296388	1	1	ZYG1_CAEEL	O17351_CAEEL	A0A131MD32_CAEEL	A0A131MC08_CAEEL
biological_process	GO:0030242	autophagy of peroxisome	4	7	0.571429	0.997963	0.0178661	1	1	ATG2_CAEEL	H2L043_CAEEL	Q22342_CAEEL	Q9BI63_CAEEL
biological_process	GO:0046854	phosphatidylinositol phosphate biosynthetic process	4	23	0.173913	0.519482	0.6846	1	1	PIKI1_CAEEL	G5EDP9_CAEEL	G5ED98_CAEEL	Q9XW63_CAEEL
biological_process	GO:0030100	regulation of endocytosis	4	11	0.363636	0.999984	5.31368e-05	1	0.045	STNB_CAEEL	P90904_CAEEL	Q09989_CAEEL	Q6AHQ8_CAEEL
cellular_component	GO:0005793	endoplasmic reticulum-Golgi intermediate compartment	4	24	0.166667	0.573975	0.633971	1	1	GBF1_CAEEL	GNA1_CAEEL	Q20913_CAEEL	Q2PJ77_CAEEL
biological_process	GO:0051306	mitotic sister chromatid separation	4	8	0.5	0.970906	0.0664719	1	1	SEP1_CAEEL	KLE2_CAEEL	CLAS2_CAEEL	Q22257_CAEEL
biological_process	GO:0002009	morphogenesis of an epithelium	4	26	0.153846	0.816503	0.275492	1	1	G5EBM0_CAEEL	G5ECA1_CAEEL	G5EBK3_CAEEL	G5EES2_CAEEL
molecular_function	GO:0015020	glucuronosyltransferase activity	4	85	0.0470588	0.00115135	0.999694	0.155	1	Q93242_CAEEL	Q0G821_CAEEL	Q9TXZ3_CAEEL	Q9U3Q6_CAEEL
biological_process	GO:0006367	transcription initiation from RNA polymerase II promoter	4	19	0.210526	0.397796	0.765368	1	1	RPB9_CAEEL	TAF1_CAEEL	O44625_CAEEL	Q8MYM8_CAEEL
biological_process	GO:0007131	reciprocal meiotic recombination	4	19	0.210526	0.606536	0.538194	1	1	MSH5_CAEEL	ZHP3_CAEEL	Q9U2S8_CAEEL	D3NQA7_CAEEL
biological_process	GO:0008355	olfactory learning	4	25	0.16	0.519482	0.6846	1	1	SRA11_CAEEL	DAF11_CAEEL	EGL4_CAEEL	G5ED46_CAEEL
biological_process	GO:0043052	thermotaxis	4	12	0.333333	0.963125	0.12658	1	1	CNG_CAEEL	MACO1_CAEEL	GCY23_CAEEL	GCY8_CAEEL
cellular_component	GO:0032040	small-subunit processome	4	35	0.114286	0.431823	0.752788	1	1	NH2L1_CAEEL	UTP18_CAEEL	HEAT1_CAEEL	Q9U2I4_CAEEL
biological_process	GO:0051028	mRNA transport	4	14	0.285714	0.881181	0.19936	1	1	NU214_CAEEL	DHX9_CAEEL	NXT1_CAEEL	NUP98_CAEEL
cellular_component	GO:0097546	ciliary base	4	16	0.25	0.934895	0.183032	1	1	NPHP1_CAEEL	YAP1_CAEEL	CFA36_CAEEL	G5ED37_CAEEL
cellular_component	GO:0035869	ciliary transition zone	4	30	0.133333	0.573975	0.633971	1	1	NPHP1_CAEEL	Q9NET8_CAEEL	Q21303_CAEEL	A2A266_CAEEL
biological_process	GO:1905488	positive regulation of anterior/posterior axon guidance	4	15	0.266667	0.909043	0.233828	1	1	CAPS_CAEEL	MADD_CAEEL	IDA1_CAEEL	STX1A_CAEEL
biological_process	GO:0007419	ventral cord development	4	10	0.4	0.984303	0.0705661	1	1	CAPS_CAEEL	MADD_CAEEL	IDA1_CAEEL	STX1A_CAEEL
biological_process	GO:0042147	retrograde transport, endosome to Golgi	4	27	0.148148	0.746554	0.419781	1	1	RIC1_CAEEL	VPS54_CAEEL	VPS53_CAEEL	O01485_CAEEL
biological_process	GO:0050821	protein stabilization	4	19	0.210526	0.798779	0.396305	1	1	LI15A_CAEEL	O61980_CAEEL	Q5TKA9_CAEEL	Q86S24_CAEEL
biological_process	GO:0010623	programmed cell death involved in cell development	4	17	0.235294	0.858615	0.314134	1	1	HSF1_CAEEL	LIN29_CAEEL	MIG5_CAEEL	O61792_CAEEL
cellular_component	GO:0009898	cytoplasmic side of plasma membrane	4	19	0.210526	0.890981	0.164274	1	1	RAC1_CAEEL	CLH_CAEEL	AKT1_CAEEL	G5EBV3_CAEEL
biological_process	GO:0031103	axon regeneration	4	14	0.285714	0.970906	0.0664719	1	1	RAC1_CAEEL	G5EG53_CAEEL	G5EFE1_CAEEL	H2L0C7_CAEEL
biological_process	GO:0061643	chemorepulsion of axon	4	7	0.571429	0.997963	0.0178661	1	1	RAC1_CAEEL	G5EBV3_CAEEL	O61528_CAEEL	Q17490_CAEEL
biological_process	GO:0030950	establishment or maintenance of actin cytoskeleton polarity	4	7	0.571429	0.997963	0.0178661	1	1	RAC1_CAEEL	G5EBV3_CAEEL	C4ALD5_CAEEL	Q17490_CAEEL
biological_process	GO:0070986	left/right axis specification	4	19	0.210526	0.798779	0.396305	1	1	RAC1_CAEEL	CED7_CAEEL	MIG5_CAEEL	G5EEN3_CAEEL
biological_process	GO:0038007	netrin-activated signaling pathway	4	10	0.4	0.975131	0.0966785	1	1	RAC1_CAEEL	G5EBV3_CAEEL	O61528_CAEEL	Q17490_CAEEL
biological_process	GO:0060070	canonical Wnt signaling pathway	4	27	0.148148	0.104889	0.95064	1	1	MOM4_CAEEL	NLK_CAEEL	APR1_CAEEL	MIG5_CAEEL
cellular_component	GO:0000235	astral microtubule	4	10	0.4	0.996504	0.0191557	1	0.992	CDC14_CAEEL	Q23542_CAEEL	E2JKY8_CAEEL	E2JKZ0_CAEEL
cellular_component	GO:0031901	early endosome membrane	4	19	0.210526	0.94622	0.143889	1	1	Q18930_CAEEL	H2KZI9_CAEEL	Q9XWI0_CAEEL	Q8MQ92_CAEEL
cellular_component	GO:0055038	recycling endosome membrane	4	28	0.142857	0.633816	0.57727	1	1	G5EED5_CAEEL	X5M914_CAEEL	X5M5X6_CAEEL	Q6AHQ8_CAEEL
biological_process	GO:0048489	synaptic vesicle transport	4	16	0.25	0.963904	0.0926126	1	1	LRK1_CAEEL	KLC_CAEEL	DYHC_CAEEL	UNC4_CAEEL
biological_process	GO:0045860	positive regulation of protein kinase activity	4	8	0.5	0.998986	0.00374189	1	0.981	TLK1_CAEEL	Q68TI8_CAEEL	Q2XN10_CAEEL	G3MTX3_CAEEL
biological_process	GO:0030953	astral microtubule organization	4	10	0.4	0.984303	0.0705661	1	1	CNOT1_CAEEL	CLAP3_CAEEL	CLAS2_CAEEL	ATX2_CAEEL
molecular_function	GO:0051537	2 iron, 2 sulfur cluster binding	4	21	0.190476	0.7659	0.436012	1	1	GAD3_CAEEL	Q9U3A1_CAEEL	O61198_CAEEL	O17892_CAEEL
cellular_component	GO:0005814	centriole	4	17	0.235294	0.918152	0.214166	1	1	CCNE_CAEEL	SZY20_CAEEL	ZYG1_CAEEL	G5ED37_CAEEL
cellular_component	GO:0016593	Cdc73/Paf1 complex	4	10	0.4	0.992208	0.0418857	1	1	RTF1_CAEEL	CTR9_CAEEL	Q1XFY2_CAEEL	Q9TZM9_CAEEL
molecular_function	GO:0015562	efflux transmembrane transporter activity	4	6	0.666667	0.999902	0.00161532	1	0.526	PGP1_CAEEL	Q17645_CAEEL	Q20331_CAEEL	G5EG58_CAEEL
cellular_component	GO:0071013	catalytic step 2 spliceosome	4	51	0.0784314	0.0775236	0.970112	1	1	MOG5_CAEEL	PRP8_CAEEL	CWC22_CAEEL	G5ECL3_CAEEL
cellular_component	GO:0005685	U1 snRNP	4	22	0.181818	0.806339	0.382758	1	1	YP68_CAEEL	Q21323_CAEEL	U4PBX2_CAEEL	Q22961_CAEEL
biological_process	GO:0042661	regulation of mesodermal cell fate specification	4	25	0.16	0.912423	0.175333	1	1	SMA4_CAEEL	SMA9_CAEEL	HMX_CAEEL	G5EGS7_CAEEL
biological_process	GO:0007286	spermatid development	4	17	0.235294	0.858615	0.314134	1	1	ELT1_CAEEL	ZDHCS_CAEEL	Q9U2Y6_CAEEL	Q9TZI9_CAEEL
cellular_component	GO:0035327	euchromatin	4	9	0.444444	NA	NA	NA	NA	SIG7_CAEEL	CDK12_CAEEL	Q1XFY2_CAEEL	Q9TZM9_CAEEL
molecular_function	GO:0008233	peptidase activity	4	27	0.148148	0.836352	0.194604	1	1	LMLN_CAEEL	WRT4_CAEEL	MYRF1_CAEEL	MYRF2_CAEEL
molecular_function	GO:0003899	DNA-directed 5'-3' RNA polymerase activity	4	27	0.148148	0.406836	0.773033	1	1	RPB9_CAEEL	Q8WQA3_CAEEL	Q18566_CAEEL	A5PEY3_CAEEL
biological_process	GO:0006351	transcription, DNA-templated	4	27	0.148148	0.999997	4.38328e-06	1	0.002	HIRA_CAEEL	SIG7_CAEEL	Q18566_CAEEL	A0A2C9C364_CAEEL
biological_process	GO:0009786	regulation of asymmetric cell division	4	19	0.210526	0.798779	0.396305	1	1	EGL27_CAEEL	Q9XVI2_CAEEL	Q21295_CAEEL	Q95ZN3_CAEEL
biological_process	GO:0006997	nucleus organization	4	18	0.222222	0.937867	0.119926	1	1	ANC1_CAEEL	NUP98_CAEEL	GLD2_CAEEL	Q21436_CAEEL
biological_process	GO:0008630	intrinsic apoptotic signaling pathway in response to DNA damage	4	11	0.363636	0.951273	0.12514	1	1	TNKS1_CAEEL	CEP1_CAEEL	ATM_CAEEL	SIR2_CAEEL
biological_process	GO:0043057	backward locomotion	4	6	0.666667	0.963904	0.0926126	1	1	UNC53_CAEEL	G5EEU6_CAEEL	C8JQR2_CAEEL	G5EBX1_CAEEL
biological_process	GO:0007501	mesodermal cell fate specification	4	14	0.285714	0.847126	0.261944	1	1	SEM2_CAEEL	FOZI1_CAEEL	TBX35_CAEEL	Q9XVI2_CAEEL
biological_process	GO:0090502	RNA phosphodiester bond hydrolysis, endonucleolytic	4	23	0.173913	0.256681	0.874917	1	1	REGE1_CAEEL	Q09633_CAEEL	Q9TYQ2_CAEEL	Q9U261_CAEEL
molecular_function	GO:0030170	pyridoxal phosphate binding	4	60	0.0666667	0.0279557	0.990823	0.997	1	TDC1_CAEEL	AATC_CAEEL	G5EE32_CAEEL	G5EGD0_CAEEL
cellular_component	GO:0036062	presynaptic periactive zone	4	14	0.285714	0.962035	0.126063	1	1	RPM1_CAEEL	Q22601_CAEEL	Q9U2T9_CAEEL	H2KYW1_CAEEL
biological_process	GO:0014057	positive regulation of acetylcholine secretion, neurotransmission	4	12	0.333333	0.963125	0.12658	1	1	MADD_CAEEL	ACM3_CAEEL	CBPE_CAEEL	O61528_CAEEL
cellular_component	GO:0000439	transcription factor TFIIH core complex	4	9	0.444444	0.995591	0.0282482	1	1	K8F7X5_CAEEL	Q9NA35_CAEEL	D3NQB3_CAEEL	K8ESJ1_CAEEL
cellular_component	GO:0005675	transcription factor TFIIH holo complex	4	12	0.333333	0.972446	0.100892	1	1	K8F7X5_CAEEL	Q9NA35_CAEEL	D3NQB3_CAEEL	K8ESJ1_CAEEL
biological_process	GO:0031145	anaphase-promoting complex-dependent catabolic process	4	15	0.266667	0.909043	0.233828	1	1	APC1_CAEEL	CUL2_CAEEL	CDC27_CAEEL	Q09649_CAEEL
biological_process	GO:0009968	negative regulation of signal transduction	4	16	0.25	0.843138	0.209332	1	1	EGL10_CAEEL	RGS6_CAEEL	F5GUD0_CAEEL	F5GUC9_CAEEL
biological_process	GO:0009794	regulation of mitotic cell cycle, embryonic	4	13	0.307692	0.971431	0.0836475	1	1	SZY20_CAEEL	ZYG1_CAEEL	ATX2_CAEEL	Q21436_CAEEL
molecular_function	GO:0004857	enzyme inhibitor activity	4	5	0.8	1	6.96327e-11	1	0	ELT2_CAEEL	G5EEB3_CAEEL	G5ECD7_CAEEL	G5EGT0_CAEEL
biological_process	GO:0007492	endoderm development	4	5	0.8	0.979044	0.0564671	1	1	ELT2_CAEEL	MOM4_CAEEL	NLK_CAEEL	APR1_CAEEL
cellular_component	GO:0043073	germ cell nucleus	4	13	0.307692	0.972446	0.100892	1	1	HM39_CAEEL	CWC22_CAEEL	Q21216_CAEEL	A5JYS9_CAEEL
biological_process	GO:0010608	posttranscriptional regulation of gene expression	4	14	0.285714	0.997524	0.00393418	1	0.982	GLP1_CAEEL	CCNE_CAEEL	GLD1_CAEEL	Q23191_CAEEL
molecular_function	GO:0070403	NAD+ binding	4	18	0.222222	0.853958	0.319728	1	1	SIR2_CAEEL	O17762_CAEEL	A0A061AKU6_CAEEL	D3YT50_CAEEL
biological_process	GO:0045197	establishment or maintenance of epithelial cell apical/basal polarity	4	10	0.4	0.963125	0.12658	1	1	PAR3_CAEEL	DLG1_CAEEL	Q9GZI3_CAEEL	Q9UAV8_CAEEL
molecular_function	GO:0008134	transcription factor binding	4	17	0.235294	0.9958	0.00842336	1	0.988	HDA4_CAEEL	LE756_CAEEL	DCA11_CAEEL	C6KRL4_CAEEL
biological_process	GO:0007528	neuromuscular junction development	4	8	0.5	0.998531	0.0051308	1	0.996	LIPB_CAEEL	UNC13_CAEEL	H2KZ93_CAEEL	C6KRG5_CAEEL
molecular_function	GO:0022848	acetylcholine-gated cation-selective channel activity	4	30	0.133333	0.467582	0.726392	1	1	A0A3P6N6F5_CAEEL	A0A3P6MY71_CAEEL	A0A3P6NP92_CAEEL	A0A3P6P985_CAEEL
cellular_component	GO:0005776	autophagosome	4	10	0.4	0.933429	0.168051	1	1	LGG2_CAEEL	VPS18_CAEEL	H1UBJ1_CAEEL	Q9XWQ4_CAEEL
cellular_component	GO:1904115	axon cytoplasm	4	13	0.307692	0.972446	0.100892	1	1	KCC2D_CAEEL	DYHC_CAEEL	O16637_CAEEL	Q95X88_CAEEL
biological_process	GO:0051316	attachment of spindle microtubules to kinetochore involved in meiotic chromosome segregation	4	4	1	1	0.000782739	1	0.619	BUB1_CAEEL	CLAS2_CAEEL	Q22257_CAEEL	O76447_CAEEL
molecular_function	GO:0051959	dynein light intermediate chain binding	4	14	0.285714	0.941631	0.172041	1	1	DYHC2_CAEEL	DYHC_CAEEL	A0A163VTS9_CAEEL	G5EDV4_CAEEL
biological_process	GO:0030422	production of siRNA involved in RNA interference	4	16	0.25	0.858615	0.314134	1	1	ERGO1_CAEEL	SIMR1_CAEEL	G5EBQ3_CAEEL	O62011_CAEEL
molecular_function	GO:0004190	aspartic-type endopeptidase activity	4	28	0.142857	0.406836	0.773033	1	1	ASP17_CAEEL	HRG7_CAEEL	O16635_CAEEL	Q8MYN6_CAEEL
biological_process	GO:0030007	cellular potassium ion homeostasis	4	10	0.4	0.984303	0.0705661	1	1	Q9XUG9_CAEEL	O16436_CAEEL	P90735_CAEEL	A0A131MBN3_CAEEL
biological_process	GO:0006883	cellular sodium ion homeostasis	4	10	0.4	0.984303	0.0705661	1	1	Q9XUG9_CAEEL	O16436_CAEEL	P90735_CAEEL	A0A131MBN3_CAEEL
biological_process	GO:0036376	sodium ion export across plasma membrane	4	10	0.4	0.984303	0.0705661	1	1	Q9XUG9_CAEEL	O16436_CAEEL	P90735_CAEEL	A0A131MBN3_CAEEL
molecular_function	GO:0008081	phosphoric diester hydrolase activity	4	14	0.285714	0.987899	0.0237512	1	1	ASM1_CAEEL	Q20177_CAEEL	Q23244_CAEEL	U4PRC2_CAEEL
biological_process	GO:0061066	positive regulation of dauer larval development	4	12	0.333333	0.963125	0.12658	1	1	FOXO_CAEEL	DYHC2_CAEEL	OSM3_CAEEL	IF122_CAEEL
biological_process	GO:0006520	cellular amino acid metabolic process	4	15	0.266667	4.62757e-07	1	0	1	MUTA_CAEEL	TDC1_CAEEL	G5EE32_CAEEL	G5EGD0_CAEEL
cellular_component	GO:0016342	catenin complex	4	8	0.5	0.997781	0.017653	1	0.99	HMR1_CAEEL	HMP1_CAEEL	JAC1_CAEEL	APR1_CAEEL
cellular_component	GO:0030992	intraciliary transport particle B	4	15	0.266667	0.949529	0.15355	1	1	DYF2_CAEEL	TTC30_CAEEL	CLUA1_CAEEL	G5ED37_CAEEL
biological_process	GO:0000165	MAPK cascade	4	24	0.166667	0.147114	0.914581	1	1	KCC2D_CAEEL	KRAF1_CAEEL	MOM4_CAEEL	SULU_CAEEL
biological_process	GO:0006821	chloride transport	4	59	0.0677966	0.513368	0.57058	1	1	BST17_CAEEL	G5EGT4_CAEEL	Q18303_CAEEL	O16779_CAEEL
biological_process	GO:0055059	asymmetric neuroblast division	4	11	0.363636	0.991938	0.0368749	1	1	EGL44_CAEEL	CNT2_CAEEL	SPTF3_CAEEL	PAR1_CAEEL
molecular_function	GO:0000774	adenyl-nucleotide exchange factor activity	4	9	0.444444	0.992681	0.0413525	1	1	GRPE_CAEEL	O61980_CAEEL	Q5TKA9_CAEEL	Q86S24_CAEEL
molecular_function	GO:0004698	calcium-dependent protein kinase C activity	4	14	0.285714	0.941631	0.172041	1	1	G5EFX2_CAEEL	A0A4V0ILM7_CAEEL	A0A4V0IL76_CAEEL	G5EGE3_CAEEL
biological_process	GO:0040032	post-embryonic body morphogenesis	4	20	0.2	0.766141	0.436917	1	1	G5EBM0_CAEEL	G5ECA1_CAEEL	H1ZUX0_CAEEL	H1ZUX1_CAEEL
molecular_function	GO:0005504	fatty acid binding	4	14	0.285714	0.902794	0.243328	1	1	ACX14_CAEEL	ACX15_CAEEL	ACX12_CAEEL	ACX13_CAEEL
biological_process	GO:0007631	feeding behavior	4	17	0.235294	0.921092	0.118174	1	1	EGL10_CAEEL	SULU_CAEEL	F5GUD0_CAEEL	F5GUC9_CAEEL
biological_process	GO:0040015	negative regulation of multicellular organism growth	4	15	0.266667	0.909043	0.233828	1	1	FOXO_CAEEL	EGL4_CAEEL	RIG6_CAEEL	GCY12_CAEEL
biological_process	GO:0032436	positive regulation of proteasomal ubiquitin-dependent protein catabolic process	4	48	0.0833333	0.135449	0.937646	1	1	FOXO_CAEEL	MBK2_CAEEL	UBE4_CAEEL	G5EDU4_CAEEL
cellular_component	GO:0000775	chromosome, centromeric region	4	12	0.333333	0.999434	0.0013794	1	0.316	KLE2_CAEEL	KIN20_CAEEL	KNL2_CAEEL	G5EDA3_CAEEL
biological_process	GO:0035721	intraciliary retrograde transport	4	9	0.444444	0.984303	0.0705661	1	1	DYHC2_CAEEL	BBS1_CAEEL	DYF2_CAEEL	IF122_CAEEL
biological_process	GO:0051382	kinetochore assembly	4	10	0.4	0.972161	0.0909571	1	1	NPP5_CAEEL	G5EDA3_CAEEL	Q8MNT1_CAEEL	O76447_CAEEL
biological_process	GO:0030833	regulation of actin filament polymerization	4	14	0.285714	1	1.34878e-06	1	0.001	CYFIP_CAEEL	Q9XUT0_CAEEL	A0A3P6PCS5_CAEEL	Q9U1R7_CAEEL
molecular_function	GO:0035615	clathrin adaptor activity	4	11	0.363636	0.979678	0.0833519	1	1	STNB_CAEEL	SLAP2_CAEEL	AP2M_CAEEL	Q22601_CAEEL
molecular_function	GO:0005518	collagen binding	4	5	0.8	0.999898	0.0028027	1	0.75	DDRB_CAEEL	MUA3_CAEEL	CAM1_CAEEL	DDRA_CAEEL
biological_process	GO:0018108	peptidyl-tyrosine phosphorylation	4	5	0.8	0.999999	8.79285e-06	1	0.005	DDRB_CAEEL	CAM1_CAEEL	MBK2_CAEEL	VAB1_CAEEL
biological_process	GO:0048680	positive regulation of axon regeneration	4	14	0.285714	0.766141	0.436917	1	1	DDRB_CAEEL	DDRA_CAEEL	TENSH_CAEEL	CO4A1_CAEEL
biological_process	GO:0006893	Golgi to plasma membrane transport	4	11	0.363636	0.997098	0.0114732	1	1	EXOC4_CAEEL	EXOC5_CAEEL	Q6A578_CAEEL	H2KYD0_CAEEL
biological_process	GO:0032012	regulation of ARF protein signal transduction	4	10	0.4	0.984303	0.0705661	1	1	GBF1_CAEEL	P90904_CAEEL	O18093_CAEEL	G5EFH7_CAEEL
biological_process	GO:0006814	sodium ion transport	4	13	0.307692	0.504949	0.605921	1	1	GBR1_CAEEL	G5EGI5_CAEEL	P91102_CAEEL	P90735_CAEEL
biological_process	GO:0006487	protein N-linked glycosylation	4	23	0.173913	0.455536	0.719777	1	1	MGAT1_CAEEL	FUT8_CAEEL	MOGS1_CAEEL	G5EBG7_CAEEL
biological_process	GO:0051016	barbed-end actin filament capping	4	13	0.307692	0.930082	0.195729	1	1	CAPZA_CAEEL	ADD1_CAEEL	GELS1_CAEEL	G8JYB0_CAEEL
cellular_component	GO:0000781	chromosome, telomeric region	4	23	0.173913	0.779482	0.416913	1	1	SIR2_CAEEL	Q18939_CAEEL	Q8T3E0_CAEEL	D3YT50_CAEEL
cellular_component	GO:0032580	Golgi cisterna membrane	4	19	0.210526	0.831949	0.348376	1	1	FUT8_CAEEL	FUTA_CAEEL	LIN10_CAEEL	Q19989_CAEEL
biological_process	GO:0048665	neuron fate specification	4	18	0.222222	0.766141	0.436917	1	1	HLH2_CAEEL	SOX2_CAEEL	ZTF11_CAEEL	Q7JNM3_CAEEL
cellular_component	GO:0005869	dynactin complex	4	13	0.307692	0.972446	0.100892	1	1	CAPZA_CAEEL	Q23542_CAEEL	E2JKY8_CAEEL	E2JKZ0_CAEEL
molecular_function	GO:0005261	cation channel activity	4	32	0.125	0.996487	0.00511071	1	0.939	PIEZ1_CAEEL	UNC80_CAEEL	CLHM1_CAEEL	G5ECM4_CAEEL
biological_process	GO:0060279	positive regulation of ovulation	4	9	0.444444	0.990911	0.0486184	1	1	PIEZ1_CAEEL	VINC_CAEEL	UNC52_CAEEL	MYSP_CAEEL
cellular_component	GO:0019005	SCF ubiquitin ligase complex	4	35	0.114286	0.431823	0.752788	1	1	CUL2_CAEEL	RPM1_CAEEL	YQOA_CAEEL	G5EF30_CAEEL
biological_process	GO:1902742	apoptotic process involved in development	4	12	0.333333	0.732166	0.476701	1	1	CED2_CAEEL	CED7_CAEEL	CED8_CAEEL	G5EEN3_CAEEL
biological_process	GO:0061025	membrane fusion	4	8	0.5	0.694323	0.426451	1	1	ZDHCS_CAEEL	G5EGF4_CAEEL	Q2EEM5_CAEEL	G5EGG0_CAEEL
biological_process	GO:1903863	P granule assembly	4	10	0.4	0.984303	0.0705661	1	1	G5EBQ3_CAEEL	Q9TZK8_CAEEL	Q9TXM1_CAEEL	H2KZD5_CAEEL
molecular_function	GO:0046920	alpha-(1->3)-fucosyltransferase activity	4	16	0.25	0.902794	0.243328	1	1	FUTA_CAEEL	G5EGL5_CAEEL	Q7YXC4_CAEEL	O17552_CAEEL
biological_process	GO:0051017	actin filament bundle assembly	4	24	0.166667	0.931079	0.1527	1	1	SYG1_CAEEL	UNC87_CAEEL	PLA2_CAEEL	ANI1_CAEEL
biological_process	GO:0016540	protein autoprocessing	4	19	0.210526	0.798779	0.396305	1	1	WRT4_CAEEL	MYRF1_CAEEL	MYRF2_CAEEL	Q21835_CAEEL
cellular_component	GO:0034045	phagophore assembly site membrane	4	10	0.4	0.999096	0.00571764	1	0.832	ATG2_CAEEL	Q22342_CAEEL	A0A3P6NNZ8_CAEEL	A0A3P6MYF5_CAEEL
molecular_function	GO:0004983	neuropeptide Y receptor activity	4	24	0.166667	0.667074	0.545967	1	1	Q9XXU4_CAEEL	Q58AU0_CAEEL	Q6EUU1_CAEEL	G5EDR6_CAEEL
biological_process	GO:0045814	negative regulation of gene expression, epigenetic	4	7	0.571429	0.997963	0.0178661	1	1	DHX9_CAEEL	RING2_CAEEL	Q9U203_CAEEL	Q9U202_CAEEL
biological_process	GO:0010508	positive regulation of autophagy	4	13	0.307692	0.991219	0.0280643	1	1	ATG2_CAEEL	A0A3P6NNZ8_CAEEL	A0A3P6MYF5_CAEEL	Q9XWQ4_CAEEL
biological_process	GO:0007414	axonal defasciculation	4	4	1	1	0.000782739	1	0.619	EPI1_CAEEL	G5EEV6_CAEEL	C1P640_CAEEL	C1P641_CAEEL
biological_process	GO:0010950	positive regulation of endopeptidase activity	4	5	0.8	0.948828	0.141385	1	1	EPI1_CAEEL	G5EEV6_CAEEL	C1P640_CAEEL	C1P641_CAEEL
biological_process	GO:0051788	response to misfolded protein	4	5	0.8	0.766141	0.436917	1	1	EPI1_CAEEL	G5EEV6_CAEEL	C1P640_CAEEL	C1P641_CAEEL
molecular_function	GO:0005344	oxygen carrier activity	4	30	0.133333	0.467582	0.726392	1	1	GLOB9_CAEEL	Q966A3_CAEEL	A0A3B1E4T2_CAEEL	A0A3B1E9Z1_CAEEL
biological_process	GO:0048858	cell projection morphogenesis	4	12	0.333333	1	7.7428e-08	1	0	UNC53_CAEEL	G5EEU6_CAEEL	C8JQR2_CAEEL	G5EBX1_CAEEL
molecular_function	GO:0004185	serine-type carboxypeptidase activity	4	9	0.444444	0.992681	0.0413525	1	1	CTS11_CAEEL	CTS31_CAEEL	O76725_CAEEL	K8ESM2_CAEEL
biological_process	GO:1903361	protein localization to basolateral plasma membrane	4	8	0.5	0.975131	0.0966785	1	1	LIN10_CAEEL	G5EBK3_CAEEL	H8ESG1_CAEEL	Q17911_CAEEL
biological_process	GO:0042059	negative regulation of epidermal growth factor receptor signaling pathway	4	6	0.666667	0.999904	0.00115647	1	0.718	PAT2_CAEEL	MED12_CAEEL	ARK1_CAEEL	G5EGK1_CAEEL
biological_process	GO:0016560	protein import into peroxisome matrix, docking	4	4	1	1	0.000782739	1	0.619	PEX13_CAEEL	Q18426_CAEEL	Q7JM90_CAEEL	Q93930_CAEEL
molecular_function	GO:0097157	pre-mRNA intronic binding	4	6	0.666667	0.999468	0.00734481	1	0.981	PRP8_CAEEL	ASD2_CAEEL	FOX1_CAEEL	D4YW53_CAEEL
biological_process	GO:0031991	regulation of actomyosin contractile ring contraction	4	6	0.666667	0.999325	0.0088207	1	0.999	G5EC43_CAEEL	G5EG83_CAEEL	Q8MQ04_CAEEL	Q8MQ03_CAEEL
biological_process	GO:0051315	attachment of mitotic spindle microtubules to kinetochore	4	9	0.444444	0.975131	0.0966785	1	1	NUF2_CAEEL	G5EFM0_CAEEL	Q9N583_CAEEL	Q95Y84_CAEEL
biological_process	GO:0019221	cytokine-mediated signaling pathway	4	5	0.8	0.998844	0.00908938	1	0.999	PIK1_CAEEL	Q9UB29_CAEEL	Q9UB28_CAEEL	H2L0C1_CAEEL
molecular_function	GO:0035591	signaling adaptor activity	4	11	0.363636	0.853958	0.319728	1	1	CED2_CAEEL	MIG5_CAEEL	Q95XA9_CAEEL	X5LX81_CAEEL
biological_process	GO:0061038	uterus morphogenesis	4	6	0.666667	0.999325	0.0088207	1	0.999	D0IMZ6_CAEEL	D0IMZ5_CAEEL	D0IMZ8_CAEEL	D0IMZ7_CAEEL
molecular_function	GO:0098632	cell-cell adhesion mediator activity	4	11	0.363636	0.979678	0.0833519	1	1	RIG6_CAEEL	Q19128_CAEEL	Q8MQ86_CAEEL	Q8T3E5_CAEEL
biological_process	GO:0016048	detection of temperature stimulus	4	7	0.571429	0.990911	0.0486184	1	1	ZYG1_CAEEL	GCY23_CAEEL	GCY8_CAEEL	ATX2_CAEEL
biological_process	GO:0016204	determination of muscle attachment site	4	4	1	1	0.000782739	1	0.619	UNC53_CAEEL	G5EEU6_CAEEL	C8JQR2_CAEEL	G5EBX1_CAEEL
biological_process	GO:0006611	protein export from nucleus	4	13	0.307692	0.948126	0.159783	1	1	UBQL_CAEEL	Q18476_CAEEL	Q965V4_CAEEL	Q23089_CAEEL
biological_process	GO:0097501	stress response to metal ion	4	9	0.444444	0.948479	0.115553	1	1	Q8MQ16_CAEEL	Q3S1M2_CAEEL	Q7YZW1_CAEEL	Q95QE2_CAEEL
cellular_component	GO:0005923	bicellular tight junction	4	5	0.8	0.999942	0.00180242	1	0.399	Q8I103_CAEEL	H1UBL0_CAEEL	Q56VX4_CAEEL	H1UBK9_CAEEL
biological_process	GO:0034727	piecemeal microautophagy of the nucleus	4	8	0.5	0.995318	0.03105	1	1	ATG2_CAEEL	Q22342_CAEEL	A0A3P6NNZ8_CAEEL	A0A3P6MYF5_CAEEL
biological_process	GO:0061709	reticulophagy	4	6	0.666667	0.999325	0.0088207	1	0.999	ATG2_CAEEL	Q22342_CAEEL	A0A3P6NNZ8_CAEEL	A0A3P6MYF5_CAEEL
biological_process	GO:0010738	regulation of protein kinase A signaling	4	4	1	1	0.000782739	1	0.619	AKAP1_CAEEL	A0A2K5ATU5_CAEEL	A0A2K5ATU1_CAEEL	A0A2K5ATV3_CAEEL
molecular_function	GO:0003997	acyl-CoA oxidase activity	4	7	0.571429	0.998385	0.0149841	1	1	ACX14_CAEEL	ACX15_CAEEL	ACX12_CAEEL	ACX13_CAEEL
biological_process	GO:0033540	fatty acid beta-oxidation using acyl-CoA oxidase	4	7	0.571429	0.997963	0.0178661	1	1	ACX14_CAEEL	ACX15_CAEEL	ACX12_CAEEL	ACX13_CAEEL
biological_process	GO:0009755	hormone-mediated signaling pathway	4	15	0.266667	0.96161	0.114851	1	1	NHR2_CAEEL	NHR7_CAEEL	NHR85_CAEEL	Q9N2W3_CAEEL
cellular_component	GO:0046658	anchored component of plasma membrane	4	9	0.444444	0.992208	0.0418857	1	1	G5ECV3_CAEEL	S6EZQ4_CAEEL	S6FN15_CAEEL	S6FWQ0_CAEEL
molecular_function	GO:0031151	histone methyltransferase activity (H3-K79 specific)	4	9	0.444444	0.992681	0.0413525	1	1	Q18939_CAEEL	O17351_CAEEL	A0A131MD32_CAEEL	A0A131MC08_CAEEL
cellular_component	GO:0008091	spectrin	4	4	1	1	0.000406636	1	0.119	G5EG85_CAEEL	Q9U9J8_CAEEL	S6FN00_CAEEL	E0AHA7_CAEEL
molecular_function	GO:0030506	ankyrin binding	4	4	1	1	0.00064225	1	0.292	Q53U86_CAEEL	Q53U87_CAEEL	Q4PIU9_CAEEL	Q18100_CAEEL
biological_process	GO:0072318	clathrin coat disassembly	4	4	1	0.999996	0.000131019	1	0.142	G5EDJ6_CAEEL	D7SFQ5_CAEEL	A0A486WXP9_CAEEL	D7SFQ6_CAEEL
biological_process	GO:0007157	heterophilic cell-cell adhesion via plasma membrane cell adhesion molecules	4	7	0.571429	0.997963	0.0178661	1	1	G5EG33_CAEEL	A0A4V0IK01_CAEEL	A0A4V0ILL2_CAEEL	G5ED27_CAEEL
molecular_function	GO:0015250	water channel activity	4	19	0.210526	0.826307	0.358671	1	1	Q18469_CAEEL	A0A131MBS2_CAEEL	G5EEK0_CAEEL	Q9XW36_CAEEL
biological_process	GO:0051482	positive regulation of cytosolic calcium ion concentration involved in phospholipase C-activating G protein-coupled signaling pathway	4	4	1	1	0.000782739	1	0.619	A0A4V0ILV8_CAEEL	H2KZ99_CAEEL	Q18564_CAEEL	H2KZA0_CAEEL
biological_process	GO:0150105	protein localization to cell-cell junction	4	4	1	0.997963	0.0178661	1	1	Q8I103_CAEEL	H1UBL0_CAEEL	Q56VX4_CAEEL	H1UBK9_CAEEL
biological_process	GO:2001295	malonyl-CoA biosynthetic process	4	4	1	1	0.000782739	1	0.619	Q9GZI3_CAEEL	Q9XUC3_CAEEL	H2L0M0_CAEEL	C1P655_CAEEL
cellular_component	GO:0062023	collagen-containing extracellular matrix	4	13	0.307692	1	9.55832e-08	1	0	G5ECV3_CAEEL	S6EZQ4_CAEEL	S6FN15_CAEEL	S6FWQ0_CAEEL
biological_process	GO:1905475	regulation of protein localization to membrane	4	8	0.5	0.980959	0.0468298	1	1	G5ECV3_CAEEL	S6EZQ4_CAEEL	S6FN15_CAEEL	S6FWQ0_CAEEL
biological_process	GO:1901673	regulation of mitotic spindle assembly	4	4	1	1	0.000782739	1	0.619	A0A486WX27_CAEEL	Q5WRT8_CAEEL	A0A486WY01_CAEEL	Q5WRT9_CAEEL
cellular_component	GO:0005798	Golgi-associated vesicle	4	4	1	0.997004	0.00916094	1	0.914	Q9U3A6_CAEEL	Q8I4H0_CAEEL	Q8I4G9_CAEEL	A5JYR4_CAEEL
molecular_function	GO:0070551	endoribonuclease activity, cleaving siRNA-paired mRNA	4	5	0.8	0.999898	0.0028027	1	0.75	G5EES3_CAEEL	Q27GU1_CAEEL	G5EGR6_CAEEL	H2KZD5_CAEEL
biological_process	GO:1902884	positive regulation of response to oxidative stress	3	34	0.0882353	0.280223	0.860295	1	1	Q9GS12_CAEEL	O45581_CAEEL	H2L059_CAEEL
biological_process	GO:0040002	collagen and cuticulin-based cuticle development	3	31	0.0967742	0.0296443	0.991554	1	1	ANI1_CAEEL	NAS37_CAEEL	BLI4_CAEEL
biological_process	GO:0016239	positive regulation of macroautophagy	3	6	0.5	0.963125	0.12658	1	1	PHA4_CAEEL	HSF1_CAEEL	Q22342_CAEEL
cellular_component	GO:0000407	phagophore assembly site	3	14	0.214286	0.992603	0.0237937	1	1	ATG2_CAEEL	H2L043_CAEEL	Q9BI63_CAEEL
biological_process	GO:0006518	peptide metabolic process	3	9	0.333333	0.000699605	0.999548	0.267	1	CBPE_CAEEL	Q95PY9_CAEEL	A0A061ACY6_CAEEL
molecular_function	GO:0004115	3',5'-cyclic-AMP phosphodiesterase activity	3	7	0.428571	0.985016	0.0856256	1	1	PDE1_CAEEL	PDE6_CAEEL	G8JYF6_CAEEL
biological_process	GO:0010754	negative regulation of cGMP-mediated signaling	3	8	0.375	0.96895	0.136106	1	1	PDE1_CAEEL	CNG_CAEEL	EGL4_CAEEL
biological_process	GO:0090038	negative regulation of protein kinase C signaling	3	7	0.428571	0.982134	0.0967102	1	1	PDE1_CAEEL	KAD2_CAEEL	G5EE33_CAEEL
biological_process	GO:0007602	phototransduction	3	15	0.2	0.766172	0.470838	1	1	PDE1_CAEEL	CNG_CAEEL	DAF11_CAEEL
biological_process	GO:0010446	response to alkaline pH	3	9	0.333333	0.951382	0.17985	1	1	PDE1_CAEEL	CHE1_CAEEL	CLUA1_CAEEL
biological_process	GO:0042542	response to hydrogen peroxide	3	13	0.230769	0.685866	0.559719	1	1	PDE1_CAEEL	DAF11_CAEEL	EGL4_CAEEL
biological_process	GO:1900194	negative regulation of oocyte maturation	3	5	0.6	0.96895	0.136106	1	1	PDE6_CAEEL	HM18_CAEEL	G8JYF6_CAEEL
biological_process	GO:0060179	male mating behavior	3	10	0.3	0.430884	0.727129	1	1	PKD1_CAEEL	G5ECV2_CAEEL	O17470_CAEEL
biological_process	GO:0007567	parturition	3	8	0.375	0.96895	0.136106	1	1	SMA4_CAEEL	VAB15_CAEEL	UNC58_CAEEL
cellular_component	GO:0005788	endoplasmic reticulum lumen	3	29	0.103448	0.366029	0.819879	1	1	ENPL1_CAEEL	EST1_CAEEL	Q09396_CAEEL
biological_process	GO:0007413	axonal fasciculation	3	15	0.2	0.766172	0.470838	1	1	PLX2_CAEEL	NDF1_CAEEL	U4PBJ9_CAEEL
biological_process	GO:0007212	dopamine receptor signaling pathway	3	24	0.125	0.260674	0.885697	1	1	EGL10_CAEEL	F5GUD0_CAEEL	F5GUC9_CAEEL
biological_process	GO:0051567	histone H3-K9 methylation	3	4	0.75	0.997963	0.0178661	1	1	MET2_CAEEL	A4LBC3_CAEEL	A4LBC2_CAEEL
molecular_function	GO:0008168	methyltransferase activity	3	32	0.09375	0.00800987	0.996154	0.754	1	SET25_CAEEL	Q564W8_CAEEL	P91862_CAEEL
biological_process	GO:0030206	chondroitin sulfate biosynthetic process	3	37	0.0810811	0.111804	0.959947	1	1	Q9GS12_CAEEL	O45581_CAEEL	H2L059_CAEEL
molecular_function	GO:0000976	transcription cis-regulatory region binding	3	11	0.272727	1	1.7028e-08	1	0	PER_CAEEL	CEP1_CAEEL	Q8MXH4_CAEEL
biological_process	GO:0009411	response to UV	3	21	0.142857	0.377758	0.814052	1	1	FOXO_CAEEL	SMC1_CAEEL	RT4I1_CAEEL
biological_process	GO:0050832	defense response to fungus	3	32	0.09375	0.173353	0.931597	1	1	NIPI4_CAEEL	O01443_CAEEL	H2KYD2_CAEEL
biological_process	GO:0007218	neuropeptide signaling pathway	3	142	0.0211268	1.86954e-08	1	0	1	Q19399_CAEEL	Q58AU0_CAEEL	Q22746_CAEEL
molecular_function	GO:0008094	ATP-dependent activity, acting on DNA	3	17	0.176471	0.984208	0.0254504	1	1	MSH5_CAEEL	G5EF07_CAEEL	P91094_CAEEL
biological_process	GO:0071244	cellular response to carbon dioxide	3	6	0.5	0.991179	0.0629199	1	1	CAPS_CAEEL	CBPE_CAEEL	G5EG65_CAEEL
biological_process	GO:1903745	negative regulation of pharyngeal pumping	3	6	0.5	0.991179	0.0629199	1	1	CAPS_CAEEL	CBPE_CAEEL	G5EG65_CAEEL
biological_process	GO:0006972	hyperosmotic response	3	29	0.103448	0.260674	0.885697	1	1	SOL1_CAEEL	GCK3_CAEEL	Q93194_CAEEL
biological_process	GO:0097499	protein localization to non-motile cilium	3	8	0.375	0.909043	0.233828	1	1	DAF25_CAEEL	AP2M_CAEEL	Q17796_CAEEL
biological_process	GO:0034606	response to hermaphrodite contact	3	14	0.214286	0.804271	0.423436	1	1	PKD1_CAEEL	NPHP1_CAEEL	RCANL_CAEEL
cellular_component	GO:0016607	nuclear speck	3	35	0.0857143	0.247212	0.891995	1	1	CWC22_CAEEL	LE756_CAEEL	Q93339_CAEEL
cellular_component	GO:0034990	nuclear mitotic cohesin complex	3	6	0.5	0.995203	0.0409996	1	1	SCC3_CAEEL	SMC3_CAEEL	SMC1_CAEEL
biological_process	GO:0006302	double-strand break repair	3	11	0.272727	0.728768	0.368294	1	1	TNKS1_CAEEL	TYDP1_CAEEL	DPOLQ_CAEEL
biological_process	GO:0007064	mitotic sister chromatid cohesion	3	10	0.3	0.96161	0.114851	1	1	SMC3_CAEEL	SMC1_CAEEL	G5EC05_CAEEL
biological_process	GO:0006904	vesicle docking involved in exocytosis	3	10	0.3	0.99947	0.00233737	1	0.895	EXOC4_CAEEL	VPS18_CAEEL	O44412_CAEEL
biological_process	GO:0016331	morphogenesis of embryonic epithelium	3	15	0.2	0.766172	0.470838	1	1	EFN4_CAEEL	VAB1_CAEEL	ARP2_CAEEL
biological_process	GO:0006891	intra-Golgi vesicle-mediated transport	3	23	0.130435	0.625787	0.588291	1	1	COPE_CAEEL	B1V899_CAEEL	H2L0P2_CAEEL
biological_process	GO:0008344	adult locomotory behavior	3	10	0.3	0.929434	0.226686	1	1	SOL1_CAEEL	MAK1_CAEEL	UNC22_CAEEL
biological_process	GO:0048846	axon extension involved in axon guidance	3	12	0.25	0.884447	0.226497	1	1	RAC1_CAEEL	LRK1_CAEEL	G5EBV3_CAEEL
biological_process	GO:0031115	negative regulation of microtubule polymerization	3	6	0.5	0.995318	0.03105	1	1	RAC1_CAEEL	G5EBV3_CAEEL	Q17490_CAEEL
molecular_function	GO:0008022	protein C-terminus binding	3	17	0.176471	0.718869	0.52347	1	1	RIM_CAEEL	ATX2_CAEEL	Q22601_CAEEL
biological_process	GO:0030178	negative regulation of Wnt signaling pathway	3	7	0.428571	0.484651	0.737899	1	1	APR1_CAEEL	U4PBY0_CAEEL	A0A1I6CM53_CAEEL
biological_process	GO:0030590	first cell cycle pseudocleavage	3	6	0.5	0.991179	0.0629199	1	1	KC1G_CAEEL	PSA_CAEEL	ANI1_CAEEL
cellular_component	GO:0031045	dense core granule	3	8	0.375	0.999995	5.15933e-05	1	0.017	CAPS_CAEEL	IDA1_CAEEL	CLA1_CAEEL
cellular_component	GO:0005797	Golgi medial cisterna	3	11	0.272727	0.941397	0.197506	1	1	MGAT1_CAEEL	G5EG65_CAEEL	G5EBG7_CAEEL
cellular_component	GO:0005762	mitochondrial large ribosomal subunit	3	36	0.0833333	0.227416	0.90285	1	1	RM03_CAEEL	Q22623_CAEEL	O61818_CAEEL
biological_process	GO:0010940	positive regulation of necrotic cell death	3	17	0.176471	0.685866	0.559719	1	1	SH3GH_CAEEL	PICAL_CAEEL	AP2M_CAEEL
biological_process	GO:0043058	regulation of backward locomotion	3	17	0.176471	0.644765	0.600616	1	1	LIN10_CAEEL	UBR1_CAEEL	G5EBQ0_CAEEL
molecular_function	GO:0016791	phosphatase activity	3	43	0.0697674	0.00281335	0.998339	0.378	1	CDC14_CAEEL	PHO10_CAEEL	Q9BL40_CAEEL
molecular_function	GO:0017025	TBP-class protein binding	3	8	0.375	0.973774	0.121265	1	1	TAF1_CAEEL	A0A131MCT5_CAEEL	A0A131MBG0_CAEEL
biological_process	GO:0007017	microtubule-based process	3	16	0.1875	1	4.29889e-09	1	0	MBK2_CAEEL	ZYG9_CAEEL	Q9XWA8_CAEEL
biological_process	GO:0006801	superoxide metabolic process	3	9	0.333333	0.804271	0.423436	1	1	A0A486WY04_CAEEL	Q7JL02_CAEEL	P90956_CAEEL
biological_process	GO:0007040	lysosome organization	3	26	0.115385	0.0790996	0.973509	1	1	CTNS_CAEEL	VPS18_CAEEL	Q9XVL8_CAEEL
cellular_component	GO:0030016	myofibril	3	12	0.25	1	1.98433e-15	1	0	TMOD_CAEEL	MYO2_CAEEL	O62244_CAEEL
cellular_component	GO:0005865	striated muscle thin filament	3	17	0.176471	0.515318	0.685503	1	1	TMOD_CAEEL	KI26L_CAEEL	UNC87_CAEEL
biological_process	GO:0008284	positive regulation of cell population proliferation	3	16	0.1875	0.825275	0.338356	1	1	CCNE_CAEEL	HMX_CAEEL	LE756_CAEEL
biological_process	GO:0048566	embryonic digestive tract development	3	5	0.6	0.933528	0.135475	1	1	RSA2_CAEEL	SKN1_CAEEL	Q9XVI2_CAEEL
biological_process	GO:0006970	response to osmotic stress	3	17	0.176471	0.307716	0.821625	1	1	DAF25_CAEEL	G5ED37_CAEEL	Q93759_CAEEL
biological_process	GO:0006813	potassium ion transport	3	45	0.0666667	0.427506	0.638341	1	1	MEC2_CAEEL	GBR1_CAEEL	P90735_CAEEL
molecular_function	GO:0008559	ABC-type xenobiotic transporter activity	3	10	0.3	0.939568	0.204417	1	1	PGP1_CAEEL	Q17645_CAEEL	B6VQ78_CAEEL
cellular_component	GO:0008278	cohesin complex	3	9	0.333333	0.941397	0.197506	1	1	SCC3_CAEEL	SMC3_CAEEL	SMC1_CAEEL
biological_process	GO:0034087	establishment of mitotic sister chromatid cohesion	3	5	0.6	0.996609	0.0358703	1	1	SCC3_CAEEL	SMC3_CAEEL	SMC1_CAEEL
biological_process	GO:0031175	neuron projection development	3	18	0.166667	1	1.05757e-09	1	0	Q5DX48_CAEEL	H2KYW1_CAEEL	H2KZU6_CAEEL
molecular_function	GO:0035091	phosphatidylinositol binding	3	38	0.0789474	0.947874	0.0866692	1	1	PAR3_CAEEL	PIKI1_CAEEL	G5EF63_CAEEL
biological_process	GO:0007179	transforming growth factor beta receptor signaling pathway	3	17	0.176471	0.514563	0.655729	1	1	DAF14_CAEEL	SMA4_CAEEL	SMA9_CAEEL
cellular_component	GO:0098978	glutamatergic synapse	3	6	0.5	0.995203	0.0409996	1	1	SRBS1_CAEEL	SH3GH_CAEEL	Q20298_CAEEL
biological_process	GO:0019953	sexual reproduction	3	7	0.428571	0.999947	8.82343e-05	1	0.069	LPLT1_CAEEL	H1ZUX0_CAEEL	H1ZUX1_CAEEL
biological_process	GO:0010085	polarity specification of proximal/distal axis	3	8	0.375	0.96895	0.136106	1	1	NLK_CAEEL	Q9XVI2_CAEEL	Q95ZN3_CAEEL
molecular_function	GO:0005484	SNAP receptor activity	3	29	0.103448	0.299472	0.862765	1	1	GOSR2_CAEEL	STX1A_CAEEL	SYB1_CAEEL
cellular_component	GO:0005639	integral component of nuclear inner membrane	3	7	0.428571	0.990064	0.0642975	1	1	TM201_CAEEL	Q9N368_CAEEL	Q8MXS6_CAEEL
molecular_function	GO:0015293	symporter activity	3	31	0.0967742	0.0290953	0.987752	0.997	1	SNF5_CAEEL	CTNS_CAEEL	O44752_CAEEL
cellular_component	GO:0036464	cytoplasmic ribonucleoprotein granule	3	8	0.375	1	2.13166e-07	1	0	REGE1_CAEEL	Q9TYQ2_CAEEL	Q9U261_CAEEL
molecular_function	GO:0004521	endoribonuclease activity	3	23	0.130435	0.667524	0.47425	1	1	REGE1_CAEEL	Q9TYQ2_CAEEL	Q9U261_CAEEL
biological_process	GO:0030150	protein import into mitochondrial matrix	3	17	0.176471	0.685866	0.559719	1	1	GRPE_CAEEL	H2L085_CAEEL	Q9TXR7_CAEEL
biological_process	GO:0008608	attachment of spindle microtubules to kinetochore	3	13	0.230769	0.998738	0.00484667	1	0.996	NUF2_CAEEL	G5EDA3_CAEEL	Q8MNT1_CAEEL
biological_process	GO:0034501	protein localization to kinetochore	3	12	0.25	0.930082	0.195729	1	1	BUB1_CAEEL	NPP5_CAEEL	NUP98_CAEEL
biological_process	GO:0010452	histone H3-K36 methylation	3	5	0.6	0.999551	0.0046822	1	0.99	MET2_CAEEL	A4LBC3_CAEEL	A4LBC2_CAEEL
biological_process	GO:0030010	establishment of cell polarity	3	13	0.230769	0.999958	0.000110061	1	0.094	PAR3_CAEEL	PAR1_CAEEL	G5ECB9_CAEEL
cellular_component	GO:0048788	cytoskeleton of presynaptic active zone	3	3	1	1	0.00286516	1	0.617	RIM_CAEEL	SPD5_CAEEL	O44490_CAEEL
cellular_component	GO:0042734	presynaptic membrane	3	7	0.428571	0.987442	0.0365828	1	1	RIM_CAEEL	PICAL_CAEEL	UNC13_CAEEL
biological_process	GO:0048167	regulation of synaptic plasticity	3	3	1	0.982134	0.0967102	1	1	RIM_CAEEL	SPD5_CAEEL	O44490_CAEEL
cellular_component	GO:0005680	anaphase-promoting complex	3	14	0.214286	0.873937	0.31961	1	1	APC1_CAEEL	CDC27_CAEEL	Q09649_CAEEL
biological_process	GO:0030538	embryonic genitalia morphogenesis	3	6	0.5	0.991179	0.0629199	1	1	RENT1_CAEEL	Q1T6W7_CAEEL	Q9BL68_CAEEL
molecular_function	GO:0000175	3'-5'-exoribonuclease activity	3	23	0.130435	0.419917	0.784596	1	1	A0A0M9JJ86_CAEEL	A0A0M7RFG6_CAEEL	Q965N3_CAEEL
molecular_function	GO:0005222	intracellular cAMP-activated cation channel activity	3	7	0.428571	0.985016	0.0856256	1	1	CNG_CAEEL	O61827_CAEEL	Q9N4C1_CAEEL
molecular_function	GO:0005223	intracellular cGMP-activated cation channel activity	3	6	0.5	0.992655	0.0553507	1	1	CNG_CAEEL	O61827_CAEEL	Q9N4C1_CAEEL
biological_process	GO:0098655	cation transmembrane transport	3	11	0.272727	0.278323	0.763693	1	1	CNG_CAEEL	PIEZ1_CAEEL	G5ECM4_CAEEL
cellular_component	GO:0005581	collagen trimer	3	73	0.0410959	0.0132053	0.996021	0.773	1	G5EDV5_CAEEL	P91248_CAEEL	G5EF89_CAEEL
biological_process	GO:0001820	serotonin secretion	3	5	0.6	0.996609	0.0358703	1	1	CAPS_CAEEL	H9G2V2_CAEEL	H9G2V3_CAEEL
biological_process	GO:0043066	negative regulation of apoptotic process	3	33	0.0909091	0.194886	0.903627	1	1	CGH1_CAEEL	IASPP_CAEEL	GCK1_CAEEL
biological_process	GO:0006635	fatty acid beta-oxidation	3	37	0.0810811	0.536648	0.614419	1	1	O17762_CAEEL	A0A061AKU6_CAEEL	O45106_CAEEL
biological_process	GO:0016236	macroautophagy	3	15	0.2	0.925329	0.12375	1	1	LGG2_CAEEL	H1UBJ1_CAEEL	Q9XWQ4_CAEEL
molecular_function	GO:0019894	kinesin binding	3	20	0.15	0.602448	0.638971	1	1	KLC_CAEEL	G5ED37_CAEEL	Q22368_CAEEL
biological_process	GO:0007274	neuromuscular synaptic transmission	3	13	0.230769	0.798779	0.396305	1	1	SPD5_CAEEL	O44490_CAEEL	Q9N415_CAEEL
biological_process	GO:0016358	dendrite development	3	11	0.272727	0.937778	0.134103	1	1	G5EG85_CAEEL	Q9U9J8_CAEEL	E0AHA7_CAEEL
biological_process	GO:0043053	dauer entry	3	17	0.176471	0.690203	0.483288	1	1	DYHC2_CAEEL	OSM3_CAEEL	G5ED37_CAEEL
biological_process	GO:0031087	deadenylation-independent decapping of nuclear-transcribed mRNA	3	4	0.75	0.999217	0.0163824	1	1	Q8ITV7_CAEEL	Q21740_CAEEL	Q8ITV6_CAEEL
molecular_function	GO:0043130	ubiquitin binding	3	34	0.0882353	0.186827	0.924656	1	1	G5EDT9_CAEEL	Q17796_CAEEL	Q9NA71_CAEEL
biological_process	GO:0008219	cell death	3	16	0.1875	0.940682	0.0805608	1	1	ASP17_CAEEL	HRG7_CAEEL	Q8MYN6_CAEEL
cellular_component	GO:0044214	spanning component of plasma membrane	3	6	0.5	0.995203	0.0409996	1	1	HMR1_CAEEL	GLP1_CAEEL	TRA2_CAEEL
biological_process	GO:0061512	protein localization to cilium	3	7	0.428571	0.937778	0.134103	1	1	BBS1_CAEEL	IF122_CAEEL	ARL6_CAEEL
biological_process	GO:0030536	larval feeding behavior	3	11	0.272727	0.903322	0.275439	1	1	CAPS_CAEEL	EGL4_CAEEL	CBPE_CAEEL
biological_process	GO:0051302	regulation of cell division	3	14	0.214286	0.946611	0.0926497	1	1	BED3_CAEEL	GLD2_CAEEL	Q09649_CAEEL
biological_process	GO:0072327	vulval cell fate specification	3	10	0.3	0.929434	0.226686	1	1	BED3_CAEEL	PAT2_CAEEL	G5EGK1_CAEEL
molecular_function	GO:0043138	3'-5' DNA helicase activity	3	9	0.333333	0.958647	0.161221	1	1	DHX9_CAEEL	WRN_CAEEL	Q9XWI1_CAEEL
biological_process	GO:0007210	serotonin receptor signaling pathway	3	15	0.2	0.726513	0.516381	1	1	HSF1_CAEEL	G5ECV2_CAEEL	O17470_CAEEL
biological_process	GO:0034504	protein localization to nucleus	3	6	0.5	0.98855	0.0227022	1	1	LIDB1_CAEEL	Q9U3E2_CAEEL	Q9XXT5_CAEEL
cellular_component	GO:1990124	messenger ribonucleoprotein complex	3	12	0.25	0.921674	0.237233	1	1	LIN41_CAEEL	CPB3_CAEEL	CGH1_CAEEL
molecular_function	GO:0015379	potassium:chloride symporter activity	3	24	0.125	0.454033	0.760055	1	1	Q6A583_CAEEL	O44846_CAEEL	A0A0K3AX20_CAEEL
biological_process	GO:0006884	cell volume homeostasis	3	26	0.115385	0.485315	0.712919	1	1	Q6A583_CAEEL	O44846_CAEEL	A0A0K3AX20_CAEEL
biological_process	GO:0055064	chloride ion homeostasis	3	24	0.125	0.411709	0.791035	1	1	Q6A583_CAEEL	O44846_CAEEL	A0A0K3AX20_CAEEL
biological_process	GO:0055075	potassium ion homeostasis	3	24	0.125	0.802178	0.338827	1	1	Q6A583_CAEEL	O44846_CAEEL	A0A0K3AX20_CAEEL
molecular_function	GO:0043539	protein serine/threonine kinase activator activity	3	11	0.272727	0.826307	0.358671	1	1	G5ED67_CAEEL	G5EFK2_CAEEL	G5EFN2_CAEEL
molecular_function	GO:0004502	kynurenine 3-monooxygenase activity	3	3	1	1	0.00403687	1	0.911	KMO_CAEEL	B5BM30_CAEEL	Q21794_CAEEL
molecular_function	GO:0016174	NAD(P)H oxidase H2O2-forming activity	3	6	0.5	0.860437	0.343543	1	1	KMO_CAEEL	B5BM30_CAEEL	Q21794_CAEEL
biological_process	GO:0070189	kynurenine metabolic process	3	3	1	0.951382	0.17985	1	1	KMO_CAEEL	B5BM30_CAEEL	Q21794_CAEEL
cellular_component	GO:0032991	protein-containing complex	3	22	0.136364	0.999942	7.33147e-05	1	0.023	EXT2_CAEEL	RIC1_CAEEL	GLD2_CAEEL
biological_process	GO:1905936	regulation of germ cell proliferation	3	8	0.375	0.951382	0.17985	1	1	GLP1_CAEEL	GLD1_CAEEL	ATX2_CAEEL
biological_process	GO:0045887	positive regulation of synaptic assembly at neuromuscular junction	3	9	0.333333	0.951382	0.17985	1	1	FOXO_CAEEL	BLI4_CAEEL	CBPE_CAEEL
cellular_component	GO:0005863	striated muscle myosin thick filament	3	13	0.230769	0.899108	0.278135	1	1	MLE_CAEEL	MYO4_CAEEL	G8JY79_CAEEL
biological_process	GO:0032504	multicellular organism reproduction	3	26	0.115385	0.999653	0.000507894	1	0.388	PPN1_CAEEL	RT4I1_CAEEL	Q21126_CAEEL
biological_process	GO:0030512	negative regulation of transforming growth factor beta receptor signaling pathway	3	10	0.3	0.929434	0.226686	1	1	DYHC2_CAEEL	EGL4_CAEEL	SMA9_CAEEL
cellular_component	GO:0000779	condensed chromosome, centromeric region	3	6	0.5	0.999716	0.00076915	1	0.198	G5EDA3_CAEEL	Q9N583_CAEEL	Q95Y84_CAEEL
biological_process	GO:0008277	regulation of G protein-coupled receptor signaling pathway	3	8	0.375	0.840217	0.374642	1	1	EGL10_CAEEL	F5GUD0_CAEEL	F5GUC9_CAEEL
biological_process	GO:0007622	rhythmic behavior	3	5	0.6	0.929434	0.226686	1	1	EGL10_CAEEL	F5GUD0_CAEEL	F5GUC9_CAEEL
biological_process	GO:0000303	response to superoxide	3	9	0.333333	0.804271	0.423436	1	1	SKN1_CAEEL	RT4I1_CAEEL	Q18965_CAEEL
cellular_component	GO:0035097	histone methyltransferase complex	3	4	0.75	0.979996	0.0533217	1	1	HCF1_CAEEL	ZFP1_CAEEL	A0A168H365_CAEEL
biological_process	GO:0051295	establishment of meiotic spindle localization	3	7	0.428571	0.984303	0.0705661	1	1	APC1_CAEEL	KLC_CAEEL	O17666_CAEEL
biological_process	GO:0035966	response to topologically incorrect protein	3	9	0.333333	0.988724	0.0202784	1	1	HSF1_CAEEL	E2AKA_CAEEL	Q20435_CAEEL
biological_process	GO:1903998	regulation of eating behavior	3	8	0.375	0.87625	0.193075	1	1	CAPS_CAEEL	EGL4_CAEEL	CBPE_CAEEL
molecular_function	GO:0016712	oxidoreductase activity, acting on paired donors, with incorporation or reduction of molecular oxygen, reduced flavin or flavoprotein as one donor, and incorporation of one atom of oxygen	3	47	0.0638298	0.0403719	0.987894	1	1	A0A0M9JJ78_CAEEL	O16671_CAEEL	A0A0M7RF98_CAEEL
molecular_function	GO:0008395	steroid hydroxylase activity	3	47	0.0638298	0.0454059	0.986127	1	1	A0A0M9JJ78_CAEEL	O16671_CAEEL	A0A0M7RF98_CAEEL
biological_process	GO:0007267	cell-cell signaling	3	11	0.272727	0.999796	0.000303719	1	0.251	SYG1_CAEEL	SYG2_CAEEL	WRT4_CAEEL
biological_process	GO:0006082	organic acid metabolic process	3	47	0.0638298	7.7347e-09	1	0	1	A0A0M9JJ78_CAEEL	O16671_CAEEL	A0A0M7RF98_CAEEL
biological_process	GO:0006805	xenobiotic metabolic process	3	49	0.0612245	0.026087	0.992705	1	1	A0A0M9JJ78_CAEEL	O16671_CAEEL	A0A0M7RF98_CAEEL
cellular_component	GO:1990633	mutator focus	3	9	0.333333	0.971752	0.124302	1	1	Q19672_CAEEL	Q22061_CAEEL	O62011_CAEEL
biological_process	GO:0045176	apical protein localization	3	12	0.25	0.87342	0.325059	1	1	NBEA_CAEEL	CLH_CAEEL	O01485_CAEEL
molecular_function	GO:0008139	nuclear localization sequence binding	3	9	0.333333	0.958647	0.161221	1	1	NU214_CAEEL	IMA2_CAEEL	Q20703_CAEEL
molecular_function	GO:0038062	protein tyrosine kinase collagen receptor activity	3	3	1	1	0.00403687	1	0.911	DDRB_CAEEL	CAM1_CAEEL	DDRA_CAEEL
molecular_function	GO:0003746	translation elongation factor activity	3	21	0.142857	0.563988	0.672798	1	1	EFTS_CAEEL	Q564V6_CAEEL	P90922_CAEEL
biological_process	GO:0006414	translational elongation	3	15	0.2	0.543535	0.62953	1	1	EFTS_CAEEL	Q564V6_CAEEL	P90922_CAEEL
molecular_function	GO:0005546	phosphatidylinositol-4,5-bisphosphate binding	3	14	0.214286	0.827959	0.390316	1	1	CAPS_CAEEL	PICAL_CAEEL	GELS1_CAEEL
biological_process	GO:0001934	positive regulation of protein phosphorylation	3	24	0.125	0.976819	0.0457641	1	1	LE756_CAEEL	E2AKA_CAEEL	Q22342_CAEEL
biological_process	GO:1902075	cellular response to salt	3	7	0.428571	0.982134	0.0967102	1	1	CAPS_CAEEL	BLI4_CAEEL	A0A0K3ATN9_CAEEL
biological_process	GO:1902074	response to salt	3	13	0.230769	0.993741	0.0213569	1	1	CHE1_CAEEL	GCY1_CAEEL	AKT1_CAEEL
molecular_function	GO:0042162	telomeric DNA binding	3	11	0.272727	0.914661	0.203145	1	1	Q1T6W7_CAEEL	Q9U2D2_CAEEL	Q9BL68_CAEEL
biological_process	GO:0042981	regulation of apoptotic process	3	16	0.1875	0.48644	0.627008	1	1	MADD_CAEEL	DRE1_CAEEL	Q20306_CAEEL
molecular_function	GO:0030414	peptidase inhibitor activity	3	8	0.375	1	1.85901e-13	1	0	LEV9_CAEEL	A0A1N7SYU8_CAEEL	A0A1N7SZ15_CAEEL
molecular_function	GO:0008266	poly(U) RNA binding	3	23	0.130435	0.489539	0.733294	1	1	LARP1_CAEEL	FOX1_CAEEL	G5EF15_CAEEL
biological_process	GO:0048814	regulation of dendrite morphogenesis	3	13	0.230769	0.909043	0.233828	1	1	DYHC_CAEEL	Q53U87_CAEEL	E2JKZ0_CAEEL
molecular_function	GO:0035198	miRNA binding	3	5	0.6	0.997197	0.0313477	1	1	LIN41_CAEEL	G5EES3_CAEEL	G5EGR6_CAEEL
biological_process	GO:0006402	mRNA catabolic process	3	15	0.2	0.549516	0.545957	1	1	LIN41_CAEEL	DCPS_CAEEL	Q23191_CAEEL
biological_process	GO:0090727	positive regulation of brood size	3	12	0.25	0.87342	0.325059	1	1	LIN41_CAEEL	PIEZ1_CAEEL	SIMR1_CAEEL
biological_process	GO:0008306	associative learning	3	15	0.2	0.572835	0.602204	1	1	GAP2_CAEEL	G5ED46_CAEEL	Q95XA9_CAEEL
cellular_component	GO:0045179	apical cortex	3	9	0.333333	0.971752	0.124302	1	1	PAR3_CAEEL	G5ECM5_CAEEL	G5EBK3_CAEEL
biological_process	GO:0051402	neuron apoptotic process	3	4	0.75	0.951382	0.17985	1	1	G5EGD8_CAEEL	G5EDU4_CAEEL	G5EE70_CAEEL
biological_process	GO:0051782	negative regulation of cell division	3	10	0.3	0.929434	0.226686	1	1	CCNE_CAEEL	UNC22_CAEEL	APR1_CAEEL
biological_process	GO:0006378	mRNA polyadenylation	3	23	0.130435	0.260674	0.885697	1	1	CPSF1_CAEEL	GLD2_CAEEL	GLD4_CAEEL
biological_process	GO:0031146	SCF-dependent proteasomal ubiquitin-dependent protein catabolic process	3	37	0.0810811	0.111804	0.959947	1	1	CUL2_CAEEL	YQOA_CAEEL	G5EF30_CAEEL
molecular_function	GO:0008138	protein tyrosine/serine/threonine phosphatase activity	3	19	0.157895	0.802805	0.366859	1	1	CDC14_CAEEL	A0A2C9C2Y5_CAEEL	A0A2C9C318_CAEEL
biological_process	GO:0016311	dephosphorylation	3	42	0.0714286	0.00490926	0.997536	0.873	1	CDC14_CAEEL	PHO10_CAEEL	Q9BL40_CAEEL
cellular_component	GO:0034707	chloride channel complex	3	41	0.0731707	0.146638	0.943672	1	1	BST17_CAEEL	Q18303_CAEEL	O16779_CAEEL
biological_process	GO:0048675	axon extension	3	8	0.375	0.999998	6.45749e-06	1	0.003	KLC_CAEEL	A0A3P6NNZ8_CAEEL	A0A3P6MYF5_CAEEL
cellular_component	GO:0000796	condensin complex	3	9	0.333333	0.971752	0.124302	1	1	KLE2_CAEEL	Q9N583_CAEEL	Q95Y84_CAEEL
biological_process	GO:0010032	meiotic chromosome condensation	3	8	0.375	0.96895	0.136106	1	1	KLE2_CAEEL	Q9N583_CAEEL	Q95Y84_CAEEL
molecular_function	GO:0008201	heparin binding	3	10	0.3	0.939568	0.204417	1	1	G5EF26_CAEEL	Q27512_CAEEL	Q7JMT5_CAEEL
cellular_component	GO:0044291	cell-cell contact zone	3	4	0.75	0.999593	0.0102407	1	0.972	G5EBM0_CAEEL	G5ECA1_CAEEL	Q6BEU7_CAEEL
biological_process	GO:0000768	syncytium formation by plasma membrane fusion	3	4	0.75	0.96895	0.136106	1	1	G5EBM0_CAEEL	G5ECA1_CAEEL	Q6BEU7_CAEEL
molecular_function	GO:0070628	proteasome binding	3	12	0.25	0.890148	0.296471	1	1	N1NTN5_CAEEL	Q17971_CAEEL	P91834_CAEEL
cellular_component	GO:0043195	terminal bouton	3	8	0.375	0.958114	0.159624	1	1	UNC13_CAEEL	O16637_CAEEL	Q95X88_CAEEL
molecular_function	GO:0004965	G protein-coupled GABA receptor activity	3	3	1	1	0.00403687	1	0.911	GABR2_CAEEL	GABR1_CAEEL	A0A0K3ATD8_CAEEL
biological_process	GO:0007214	gamma-aminobutyric acid signaling pathway	3	9	0.333333	0.951382	0.17985	1	1	GABR2_CAEEL	GABR1_CAEEL	G5EBQ0_CAEEL
biological_process	GO:0042149	cellular response to glucose starvation	3	27	0.111111	0.3154	0.853666	1	1	Q21138_CAEEL	Q8I112_CAEEL	Q22022_CAEEL
cellular_component	GO:0043197	dendritic spine	3	4	0.75	0.999593	0.0102407	1	0.972	KIN32_CAEEL	LIN10_CAEEL	NIPI4_CAEEL
cellular_component	GO:0071565	nBAF complex	3	13	0.230769	0.899108	0.278135	1	1	X5M5M2_CAEEL	P91019_CAEEL	J7SA49_CAEEL
cellular_component	GO:0071339	MLL1 complex	3	6	0.5	0.995203	0.0409996	1	1	MXL3_CAEEL	H8ESF1_CAEEL	Q9XWN1_CAEEL
biological_process	GO:0006612	protein targeting to membrane	3	21	0.142857	0.36218	0.772635	1	1	ZDHCS_CAEEL	O44158_CAEEL	Q9U2K0_CAEEL
biological_process	GO:0050804	modulation of chemical synaptic transmission	3	29	0.103448	0.969333	0.0485944	1	1	V6CLV8_CAEEL	V6CLR8_CAEEL	V6CJD7_CAEEL
biological_process	GO:0016570	histone modification	3	6	0.5	0.383675	0.698894	1	1	CTR9_CAEEL	Q1XFY2_CAEEL	Q9TZM9_CAEEL
biological_process	GO:0006607	NLS-bearing protein import into nucleus	3	8	0.375	0.96895	0.136106	1	1	IMA2_CAEEL	Q21295_CAEEL	Q20703_CAEEL
molecular_function	GO:0003993	acid phosphatase activity	3	16	0.1875	0.756672	0.480704	1	1	PHO10_CAEEL	Q9U309_CAEEL	Q9NAM9_CAEEL
biological_process	GO:0006644	phospholipid metabolic process	3	34	0.0882353	1.22792e-06	1	0	1	O01300_CAEEL	Q965W0_CAEEL	A0A0K3ASG0_CAEEL
biological_process	GO:0051661	maintenance of centrosome location	3	10	0.3	0.929434	0.226686	1	1	DYHC_CAEEL	PSA_CAEEL	ATX2_CAEEL
molecular_function	GO:0004692	cGMP-dependent protein kinase activity	3	6	0.5	0.992655	0.0553507	1	1	EGL4_CAEEL	U4PEQ9_CAEEL	U4PRL6_CAEEL
molecular_function	GO:0005545	1-phosphatidylinositol binding	3	9	0.333333	0.958647	0.161221	1	1	PICAL_CAEEL	Q27512_CAEEL	Q7JMT5_CAEEL
biological_process	GO:0035047	centrosomal and pronuclear rotation	3	4	0.75	0.999217	0.0163824	1	1	Q23542_CAEEL	E2JKY8_CAEEL	E2JKZ0_CAEEL
biological_process	GO:2000009	negative regulation of protein localization to cell surface	3	4	0.75	0.999217	0.0163824	1	1	O18302_CAEEL	Q564T0_CAEEL	A5JYY2_CAEEL
molecular_function	GO:0016758	hexosyltransferase activity	3	19	0.157895	2.49098e-05	0.99999	0.002	1	O62165_CAEEL	D0Z5N7_CAEEL	C3JXF0_CAEEL
biological_process	GO:0007229	integrin-mediated signaling pathway	3	15	0.2	0.685866	0.559719	1	1	PAT2_CAEEL	G5EGK1_CAEEL	H2L2A7_CAEEL
biological_process	GO:0030162	regulation of proteolysis	3	9	0.333333	0.244187	0.83248	1	1	BAT42_CAEEL	SPOP_CAEEL	Q9XTS0_CAEEL
molecular_function	GO:0016907	G protein-coupled acetylcholine receptor activity	3	9	0.333333	0.958647	0.161221	1	1	ACM3_CAEEL	ACM1_CAEEL	A0A4V0IIV3_CAEEL
biological_process	GO:0140253	cell-cell fusion	3	3	1	0.990911	0.0486184	1	1	LIN29_CAEEL	G5EBM0_CAEEL	G5ECA1_CAEEL
biological_process	GO:0042811	pheromone biosynthetic process	3	6	0.5	0.991179	0.0629199	1	1	ACX14_CAEEL	ACX15_CAEEL	ACX13_CAEEL
biological_process	GO:0030241	skeletal muscle myosin thick filament assembly	3	4	0.75	0.999217	0.0163824	1	1	UNC89_CAEEL	MYO4_CAEEL	MYSP_CAEEL
biological_process	GO:0000288	nuclear-transcribed mRNA catabolic process, deadenylation-dependent decay	3	5	0.6	0.485756	0.694732	1	1	RLE1_CAEEL	CNOT1_CAEEL	DCPS_CAEEL
molecular_function	GO:0051787	misfolded protein binding	3	16	0.1875	0.756672	0.480704	1	1	YO25_CAEEL	Q9N3E0_CAEEL	Q21875_CAEEL
molecular_function	GO:0003887	DNA-directed DNA polymerase activity	3	13	0.230769	0.860437	0.343543	1	1	DPOLQ_CAEEL	O62218_CAEEL	Q9U208_CAEEL
cellular_component	GO:0045178	basal part of cell	3	7	0.428571	0.978346	0.0395764	1	1	PAR3_CAEEL	MYRF1_CAEEL	G5EC72_CAEEL
molecular_function	GO:0030619	U1 snRNA binding	3	6	0.5	0.992655	0.0553507	1	1	PRP8_CAEEL	Q21323_CAEEL	U4PBX2_CAEEL
biological_process	GO:0048382	mesendoderm development	3	7	0.428571	0.982134	0.0967102	1	1	SKN1_CAEEL	TOR_CAEEL	G5EFK2_CAEEL
biological_process	GO:0038203	TORC2 signaling	3	6	0.5	0.991179	0.0629199	1	1	G5ED67_CAEEL	G5EFK2_CAEEL	G5EFN2_CAEEL
cellular_component	GO:0071004	U2-type prespliceosome	3	15	0.2	0.84645	0.361124	1	1	YP68_CAEEL	G5ECL3_CAEEL	Q22961_CAEEL
biological_process	GO:0000289	nuclear-transcribed mRNA poly(A) tail shortening	3	19	0.157895	0.563083	0.674572	1	1	YPO4_CAEEL	CNOT1_CAEEL	G5EFX8_CAEEL
cellular_component	GO:0016514	SWI/SNF complex	3	16	0.1875	0.816968	0.402223	1	1	X5M5M2_CAEEL	P91019_CAEEL	J7SA49_CAEEL
biological_process	GO:0048790	maintenance of presynaptic active zone structure	3	3	1	1	0.00468267	1	0.996	SPD5_CAEEL	CLA1_CAEEL	O44490_CAEEL
biological_process	GO:0042694	muscle cell fate specification	3	7	0.428571	0.982134	0.0967102	1	1	MOM4_CAEEL	NLK_CAEEL	TBX35_CAEEL
biological_process	GO:0016558	protein import into peroxisome matrix	3	8	0.375	0.997518	0.0156969	1	1	G5ED99_CAEEL	Q18426_CAEEL	Q7JM90_CAEEL
biological_process	GO:0051640	organelle localization	3	4	0.75	1	4.34327e-15	1	0	Q9TZK8_CAEEL	Q9TXM1_CAEEL	Q9TZI9_CAEEL
biological_process	GO:0043409	negative regulation of MAPK cascade	3	9	0.333333	0.980606	0.0699177	1	1	RPM1_CAEEL	VHP1_CAEEL	Q95XA9_CAEEL
biological_process	GO:2000643	positive regulation of early endosome to late endosome transport	3	8	0.375	0.96895	0.136106	1	1	G5EBK3_CAEEL	G5EES2_CAEEL	Q23419_CAEEL
biological_process	GO:0008039	synaptic target recognition	3	3	1	1	0.00468267	1	0.996	SYG1_CAEEL	SYG2_CAEEL	UNC4_CAEEL
biological_process	GO:1903436	regulation of mitotic cytokinetic process	3	6	0.5	0.991179	0.0629199	1	1	SZY20_CAEEL	ZYG1_CAEEL	ATX2_CAEEL
biological_process	GO:0090169	regulation of spindle assembly	3	4	0.75	0.999999	2.49119e-05	1	0.029	SZY20_CAEEL	ZYG1_CAEEL	ATX2_CAEEL
molecular_function	GO:0004620	phospholipase activity	3	20	0.15	0.69412	0.412807	1	1	O01300_CAEEL	Q965W0_CAEEL	A0A0K3ASG0_CAEEL
biological_process	GO:0008544	epidermis development	3	16	0.1875	0.91764	0.151157	1	1	EGL27_CAEEL	HM18_CAEEL	U4PRY7_CAEEL
biological_process	GO:0006366	transcription by RNA polymerase II	3	22	0.136364	0.999976	3.42604e-05	1	0.034	O44625_CAEEL	Q9U2Z0_CAEEL	G5EEY5_CAEEL
biological_process	GO:0007269	neurotransmitter secretion	3	11	0.272727	0.999997	9.06585e-06	1	0.005	STX1A_CAEEL	SLAP2_CAEEL	O44412_CAEEL
biological_process	GO:0008285	negative regulation of cell population proliferation	3	9	0.333333	0.929434	0.226686	1	1	H2KYX2_CAEEL	Q5LK46_CAEEL	H2KYX3_CAEEL
molecular_function	GO:0005245	voltage-gated calcium channel activity	3	23	0.130435	0.249451	0.891564	1	1	CLHM1_CAEEL	G5EGL3_CAEEL	G5EG74_CAEEL
biological_process	GO:0030104	water homeostasis	3	8	0.375	0.991938	0.0368749	1	1	Q9GZI3_CAEEL	Q7KQ29_CAEEL	H2L0M0_CAEEL
molecular_function	GO:0045503	dynein light chain binding	3	6	0.5	0.992655	0.0553507	1	1	O45087_CAEEL	Q18263_CAEEL	A0A486WV95_CAEEL
cellular_component	GO:0000930	gamma-tubulin complex	3	5	0.6	0.995203	0.0409996	1	1	BL1S2_CAEEL	O61208_CAEEL	Q8ITY3_CAEEL
molecular_function	GO:0047756	chondroitin 4-sulfotransferase activity	3	30	0.1	0.273608	0.877917	1	1	Q9GS12_CAEEL	O45581_CAEEL	H2L059_CAEEL
biological_process	GO:0031123	RNA 3'-end processing	3	19	0.157895	0.231599	0.846807	1	1	GLD2_CAEEL	GLD4_CAEEL	Q09409_CAEEL
molecular_function	GO:0043015	gamma-tubulin binding	3	5	0.6	0.997197	0.0313477	1	1	BL1S2_CAEEL	O61208_CAEEL	Q8ITY3_CAEEL
biological_process	GO:0034314	Arp2/3 complex-mediated actin nucleation	3	10	0.3	0.685866	0.559719	1	1	ARP2_CAEEL	A0A3P6PCS5_CAEEL	Q9U1R7_CAEEL
biological_process	GO:0006896	Golgi to vacuole transport	3	7	0.428571	0.982134	0.0967102	1	1	VPS54_CAEEL	O16637_CAEEL	Q95X88_CAEEL
biological_process	GO:0006623	protein targeting to vacuole	3	18	0.166667	0.644765	0.600616	1	1	O16637_CAEEL	O44158_CAEEL	Q95X88_CAEEL
biological_process	GO:0051225	spindle assembly	3	7	0.428571	1	1.33956e-07	1	0.001	ZYG1_CAEEL	O61208_CAEEL	Q8ITY3_CAEEL
cellular_component	GO:0032982	myosin filament	3	7	0.428571	0.983485	0.05378	1	1	MYO2_CAEEL	MYSP_CAEEL	Q21000_CAEEL
molecular_function	GO:0019706	protein-cysteine S-palmitoyltransferase activity	3	22	0.136364	0.526264	0.704229	1	1	ZDHCS_CAEEL	Q9TYQ6_CAEEL	Q9U2K0_CAEEL
biological_process	GO:1903538	regulation of meiotic cell cycle process involved in oocyte maturation	3	4	0.75	0.96895	0.136106	1	1	PSA_CAEEL	AMP2_CAEEL	H2L0M5_CAEEL
cellular_component	GO:0032588	trans-Golgi network membrane	3	9	0.333333	0.971752	0.124302	1	1	G5EED5_CAEEL	X5M914_CAEEL	X5M5X6_CAEEL
biological_process	GO:0044805	late nucleophagy	3	7	0.428571	0.982134	0.0967102	1	1	ATG2_CAEEL	A0A3P6NNZ8_CAEEL	A0A3P6MYF5_CAEEL
biological_process	GO:0008585	female gonad development	3	5	0.6	0.999325	0.0088207	1	0.999	ATX2_CAEEL	Q9XVI2_CAEEL	Q95ZN3_CAEEL
cellular_component	GO:0005885	Arp2/3 protein complex	3	9	0.333333	0.971752	0.124302	1	1	ARP2_CAEEL	A0A3P6PCS5_CAEEL	Q9U1R7_CAEEL
molecular_function	GO:0003774	cytoskeletal motor activity	3	9	0.333333	1	2.96833e-19	1	0	Q21000_CAEEL	Q9XWR0_CAEEL	O62244_CAEEL
biological_process	GO:0051897	positive regulation of protein kinase B signaling	3	7	0.428571	0.982134	0.0967102	1	1	G5ED67_CAEEL	G5EFK2_CAEEL	G5EFN2_CAEEL
molecular_function	GO:0004180	carboxypeptidase activity	3	6	0.5	0.963082	0.0804791	1	1	GCP2_CAEEL	CBPE_CAEEL	G8JYE4_CAEEL
molecular_function	GO:0070577	lysine-acetylated histone binding	3	9	0.333333	0.958647	0.161221	1	1	N1NTN5_CAEEL	Q17971_CAEEL	P91834_CAEEL
cellular_component	GO:0016327	apicolateral plasma membrane	3	5	0.6	0.998198	0.0228982	1	1	AJM1_CAEEL	H2KYC5_CAEEL	Q95ZY7_CAEEL
molecular_function	GO:0019955	cytokine binding	3	4	0.75	0.916648	0.249816	1	1	Q9UB29_CAEEL	Q9UB28_CAEEL	H2L0C1_CAEEL
molecular_function	GO:0004896	cytokine receptor activity	3	4	0.75	0.992655	0.0553507	1	1	Q9UB29_CAEEL	Q9UB28_CAEEL	H2L0C1_CAEEL
biological_process	GO:0046847	filopodium assembly	3	3	1	0.982134	0.0967102	1	1	G5ECM5_CAEEL	X5LV34_CAEEL	X5M8S5_CAEEL
biological_process	GO:0043542	endothelial cell migration	3	3	1	1	0.00468267	1	0.996	I1W6S5_CAEEL	S6EZU2_CAEEL	Q22354_CAEEL
molecular_function	GO:0019208	phosphatase regulator activity	3	4	0.75	0.467582	0.726392	1	1	G5EEB3_CAEEL	G5ECD7_CAEEL	G5EGT0_CAEEL
molecular_function	GO:0005391	P-type sodium:potassium-exchanging transporter activity	3	7	0.428571	0.985016	0.0856256	1	1	O16436_CAEEL	P90735_CAEEL	A0A131MBN3_CAEEL
molecular_function	GO:0045504	dynein heavy chain binding	3	8	0.375	0.973774	0.121265	1	1	O45087_CAEEL	Q18263_CAEEL	A0A486WV95_CAEEL
molecular_function	GO:0032034	myosin II head/neck binding	3	3	1	1	0.00403687	1	0.911	Q8MNT0_CAEEL	Q95QI3_CAEEL	Q95QI2_CAEEL
biological_process	GO:0051496	positive regulation of stress fiber assembly	3	3	1	1	0.00468267	1	0.996	Q8MNT0_CAEEL	Q95QI3_CAEEL	Q95QI2_CAEEL
biological_process	GO:0051893	regulation of focal adhesion assembly	3	3	1	1	0.00468267	1	0.996	Q8MNT0_CAEEL	Q95QI3_CAEEL	Q95QI2_CAEEL
cellular_component	GO:0030427	site of polarized growth	3	3	1	0.997388	0.0129521	1	0.983	Q5DX48_CAEEL	Q9XUT0_CAEEL	H2KZU6_CAEEL
biological_process	GO:0010499	proteasomal ubiquitin-independent protein catabolic process	3	5	0.6	0.996609	0.0358703	1	1	N1NTN5_CAEEL	Q17971_CAEEL	P91834_CAEEL
biological_process	GO:0043004	cytoplasmic sequestering of CFTR protein	3	3	1	1	0.00468267	1	0.996	O18302_CAEEL	Q564T0_CAEEL	A5JYY2_CAEEL
biological_process	GO:0006833	water transport	3	18	0.166667	0.644765	0.600616	1	1	A0A131MBS2_CAEEL	G5EEK0_CAEEL	Q9XW36_CAEEL
molecular_function	GO:0005049	nuclear export signal receptor activity	3	9	0.333333	0.958647	0.161221	1	1	Q18476_CAEEL	Q965V4_CAEEL	Q23089_CAEEL
cellular_component	GO:0016012	sarcoglycan complex	3	4	0.75	0.999593	0.0102407	1	0.972	H2L0C3_CAEEL	Q19185_CAEEL	Q1XFY3_CAEEL
molecular_function	GO:0004866	endopeptidase inhibitor activity	3	5	0.6	1	5.72997e-13	1	0	O46015_CAEEL	Q7YTU0_CAEEL	Q7JKM0_CAEEL
cellular_component	GO:0035060	brahma complex	3	4	0.75	0.999593	0.0102407	1	0.972	X5M5M2_CAEEL	P91019_CAEEL	J7SA49_CAEEL
biological_process	GO:0090625	mRNA destabilization-mediated gene silencing by siRNA	3	3	1	1	0.00468267	1	0.996	G5EES3_CAEEL	Q27GU1_CAEEL	H2KZD5_CAEEL
biological_process	GO:0014013	regulation of gliogenesis	3	3	1	0.999999	2.49119e-05	1	0.029	H2KYX2_CAEEL	Q5LK46_CAEEL	H2KYX3_CAEEL
biological_process	GO:0035330	regulation of hippo signaling	3	3	1	1	0.000130784	1	0.127	H2KYX2_CAEEL	Q5LK46_CAEEL	H2KYX3_CAEEL
molecular_function	GO:0004312	fatty acid synthase activity	3	4	0.75	0.902794	0.243328	1	1	A0A1C3NSM6_CAEEL	Q18559_CAEEL	Q95Q02_CAEEL
molecular_function	GO:0031177	phosphopantetheine binding	3	4	0.75	0.999358	0.0142207	1	1	A0A1C3NSM6_CAEEL	Q18559_CAEEL	Q95Q02_CAEEL
biological_process	GO:0042438	melanin biosynthetic process	2	4	0.5	0.983618	0.132896	1	1	Q95XC6_CAEEL	O01497_CAEEL
biological_process	GO:0060573	cell fate specification involved in pattern specification	2	4	0.5	0.983618	0.132896	1	1	PHA4_CAEEL	MIG5_CAEEL
biological_process	GO:1903935	response to sodium arsenite	2	3	0.666667	0.995317	0.0746394	1	1	PHA4_CAEEL	TOR_CAEEL
cellular_component	GO:0031966	mitochondrial membrane	2	14	0.142857	0.000299531	0.999862	0.031	1	G5EFQ4_CAEEL	Q18965_CAEEL
biological_process	GO:0000423	mitophagy	2	13	0.153846	0.625358	0.666146	1	1	H1UBJ1_CAEEL	Q9XWQ4_CAEEL
molecular_function	GO:0004721	phosphoprotein phosphatase activity	2	17	0.117647	0.114697	0.918652	1	1	CDC14_CAEEL	VHP1_CAEEL
biological_process	GO:0090326	positive regulation of locomotion involved in locomotory behavior	2	22	0.0909091	0.262101	0.90381	1	1	VPS53_CAEEL	CBPE_CAEEL
biological_process	GO:0019915	lipid storage	2	30	0.0666667	0.16313	0.913022	1	1	G5EDF9_CAEEL	Q9XXT5_CAEEL
biological_process	GO:0032528	microvillus organization	2	5	0.4	0.995318	0.03105	1	1	PDE1_CAEEL	GCY8_CAEEL
biological_process	GO:0010753	positive regulation of cGMP-mediated signaling	2	3	0.666667	0.995317	0.0746394	1	1	DAF25_CAEEL	EGL4_CAEEL
cellular_component	GO:0098592	cytoplasmic side of apical plasma membrane	2	7	0.285714	0.935703	0.261357	1	1	GCK1_CAEEL	Q9XXK4_CAEEL
biological_process	GO:0007188	adenylate cyclase-modulating G protein-coupled receptor signaling pathway	2	33	0.0606061	0.258081	0.849885	1	1	GPA16_CAEEL	Q19523_CAEEL
biological_process	GO:0071526	semaphorin-plexin signaling pathway	2	6	0.333333	0.998682	0.00806187	1	0.997	PLX2_CAEEL	U4PBJ9_CAEEL
cellular_component	GO:0005811	lipid droplet	2	26	0.0769231	0.264302	0.901483	1	1	ATG2_CAEEL	ABH52_CAEEL
cellular_component	GO:0005640	nuclear outer membrane	2	5	0.4	0.977102	0.150369	1	1	ANC1_CAEEL	A0A2C9C3A7_CAEEL
molecular_function	GO:0052742	phosphatidylinositol kinase activity	2	5	0.4	0.795583	0.489481	1	1	PIKI1_CAEEL	Q9XW63_CAEEL
biological_process	GO:0006998	nuclear envelope organization	2	7	0.285714	0.829719	0.355235	1	1	Q9N368_CAEEL	Q8MXS6_CAEEL
biological_process	GO:0090386	phagosome maturation involved in apoptotic cell clearance	2	9	0.222222	0.726513	0.516381	1	1	PIKI1_CAEEL	Q9XVL8_CAEEL
biological_process	GO:0006631	fatty acid metabolic process	2	37	0.0540541	0.138409	0.901477	1	1	MUTA_CAEEL	Q9UAV8_CAEEL
molecular_function	GO:0019213	deacetylase activity	2	6	0.333333	0.958617	0.120465	1	1	SIR2_CAEEL	D3YT50_CAEEL
biological_process	GO:0014014	negative regulation of gliogenesis	2	3	0.666667	0.995317	0.0746394	1	1	NGN1_CAEEL	NDF1_CAEEL
biological_process	GO:0000462	maturation of SSU-rRNA from tricistronic rRNA transcript (SSU-rRNA, 5.8S rRNA, LSU-rRNA)	2	20	0.1	0.146334	0.954444	1	1	HEAT1_CAEEL	Q9U2I4_CAEEL
molecular_function	GO:0051082	unfolded protein binding	2	56	0.0357143	0.00397651	0.999313	0.495	1	GRPE_CAEEL	ENPL1_CAEEL
biological_process	GO:0090647	modulation of age-related behavioral decline	2	4	0.5	0.983618	0.132896	1	1	UNC22_CAEEL	UNC52_CAEEL
cellular_component	GO:0060473	cortical granule	2	8	0.25	0.907716	0.317714	1	1	SEP1_CAEEL	SYB1_CAEEL
cellular_component	GO:0072687	meiotic spindle	2	7	0.285714	0.762767	0.525144	1	1	SEP1_CAEEL	ZYG9_CAEEL
biological_process	GO:0060471	cortical granule exocytosis	2	6	0.333333	0.93708	0.264911	1	1	SEP1_CAEEL	CDC27_CAEEL
biological_process	GO:0030703	eggshell formation	2	17	0.117647	0.440281	0.803958	1	1	SEP1_CAEEL	CBD1_CAEEL
biological_process	GO:0048609	multicellular organismal reproductive process	2	9	0.222222	0.999869	0.000197456	1	0.197	SEP1_CAEEL	CNG_CAEEL
biological_process	GO:0017157	regulation of exocytosis	2	10	0.2	0.986522	0.0322061	1	1	SEP1_CAEEL	A0A0K3ATN9_CAEEL
biological_process	GO:0032259	methylation	2	32	0.0625	0.133938	0.910882	1	1	SET25_CAEEL	P91862_CAEEL
molecular_function	GO:0005262	calcium channel activity	2	21	0.0952381	0.995813	0.00898976	1	0.992	PKD1_CAEEL	Q9GRV5_CAEEL
cellular_component	GO:0032589	neuron projection membrane	2	16	0.125	0.999359	0.00228859	1	0.481	MEC2_CAEEL	SOL1_CAEEL
biological_process	GO:0090325	regulation of locomotion involved in locomotory behavior	2	10	0.2	0.516712	0.66819	1	1	CAPS_CAEEL	GCY12_CAEEL
cellular_component	GO:0005669	transcription factor TFIID complex	2	28	0.0714286	0.218889	0.922994	1	1	TAF1_CAEEL	Q20563_CAEEL
biological_process	GO:0046034	ATP metabolic process	2	8	0.25	1.55767e-05	0.999997	0.007	1	KAD2_CAEEL	HLH2_CAEEL
molecular_function	GO:0004707	MAP kinase activity	2	28	0.0714286	0.154018	0.951216	1	1	NLK_CAEEL	Q19243_CAEEL
biological_process	GO:1904491	protein localization to ciliary transition zone	2	10	0.2	0.773314	0.518019	1	1	Q21303_CAEEL	A2A266_CAEEL
cellular_component	GO:0000228	nuclear chromosome	2	9	0.222222	0.89228	0.161019	1	1	MSH5_CAEEL	SDC2_CAEEL
molecular_function	GO:0030983	mismatched DNA binding	2	6	0.333333	0.944649	0.245507	1	1	MSH5_CAEEL	G5EFG5_CAEEL
biological_process	GO:0001966	thigmotaxis	2	8	0.25	0.863894	0.397552	1	1	SOL1_CAEEL	ATAT1_CAEEL
biological_process	GO:0055072	iron ion homeostasis	2	10	0.2	0.625787	0.588291	1	1	MFRN_CAEEL	Q19687_CAEEL
biological_process	GO:0034608	vulval location	2	8	0.25	0.863894	0.397552	1	1	PKD1_CAEEL	RCANL_CAEEL
biological_process	GO:0040022	feminization of hermaphroditic germ-line	2	8	0.25	0.863894	0.397552	1	1	MOG5_CAEEL	DHX16_CAEEL
cellular_component	GO:0005876	spindle microtubule	2	25	0.08	0.739172	0.412385	1	1	CLAP3_CAEEL	CLAS2_CAEEL
cellular_component	GO:0000795	synaptonemal complex	2	11	0.181818	0.55748	0.718247	1	1	ZHP3_CAEEL	G5EGS8_CAEEL
biological_process	GO:0051177	meiotic sister chromatid cohesion	2	7	0.285714	0.963125	0.12658	1	1	SCC3_CAEEL	G5EC05_CAEEL
biological_process	GO:0072659	protein localization to plasma membrane	2	24	0.0833333	0.664373	0.48718	1	1	EFR3_CAEEL	TTC30_CAEEL
biological_process	GO:0042335	cuticle development	2	7	0.285714	0.0750718	0.968733	1	1	TBC11_CAEEL	LIN29_CAEEL
biological_process	GO:0006890	retrograde vesicle-mediated transport, Golgi to endoplasmic reticulum	2	23	0.0869565	0.234308	0.916964	1	1	COPE_CAEEL	O76413_CAEEL
cellular_component	GO:0000138	Golgi trans cisterna	2	11	0.181818	0.721865	0.570054	1	1	LIN10_CAEEL	G5EG65_CAEEL
biological_process	GO:0034498	early endosome to Golgi transport	2	5	0.4	0.96413	0.19758	1	1	B1V899_CAEEL	H2L0P2_CAEEL
biological_process	GO:0008595	anterior/posterior axis specification, embryo	2	15	0.133333	0.976319	0.0560891	1	1	CUL2_CAEEL	PSA_CAEEL
biological_process	GO:1902104	positive regulation of metaphase/anaphase transition of meiotic cell cycle	2	5	0.4	0.96413	0.19758	1	1	ETC1_CAEEL	CUL2_CAEEL
biological_process	GO:0030865	cortical cytoskeleton organization	2	6	0.333333	0.993496	0.016604	1	1	RAC1_CAEEL	ANI1_CAEEL
biological_process	GO:0009952	anterior/posterior pattern specification	2	21	0.0952381	0.992407	0.0154379	1	1	LPLT1_CAEEL	VAB3_CAEEL
cellular_component	GO:0055037	recycling endosome	2	34	0.0588235	0.299644	0.826001	1	1	Q09989_CAEEL	Q6AHQ8_CAEEL
molecular_function	GO:0032794	GTPase activating protein binding	2	10	0.2	0.795583	0.489481	1	1	Q22601_CAEEL	G5ECZ8_CAEEL
biological_process	GO:0032456	endocytic recycling	2	32	0.0625	0.118801	0.951103	1	1	Q19833_CAEEL	Q6AHQ8_CAEEL
cellular_component	GO:0045334	clathrin-coated endocytic vesicle	2	6	0.333333	0.958114	0.159624	1	1	CLH_CAEEL	Q22601_CAEEL
biological_process	GO:0001956	positive regulation of neurotransmitter secretion	2	6	0.333333	0.978993	0.0662542	1	1	IDA1_CAEEL	VPP1_CAEEL
biological_process	GO:0016191	synaptic vesicle uncoating	2	3	0.666667	0.995317	0.0746394	1	1	SRBS1_CAEEL	SH3GH_CAEEL
biological_process	GO:0048791	calcium ion-regulated exocytosis of neurotransmitter	2	6	0.333333	0.999991	9.04057e-05	1	0.073	RIM_CAEEL	CLA1_CAEEL
biological_process	GO:0046928	regulation of neurotransmitter secretion	2	19	0.105263	0.988316	0.0266024	1	1	H2KZJ6_CAEEL	E9P851_CAEEL
biological_process	GO:0046580	negative regulation of Ras protein signal transduction	2	20	0.1	0.292449	0.888727	1	1	LI15B_CAEEL	GAP2_CAEEL
biological_process	GO:0051123	RNA polymerase II preinitiation complex assembly	2	17	0.117647	0.399384	0.829376	1	1	TAF1_CAEEL	Q20563_CAEEL
biological_process	GO:0007026	negative regulation of microtubule depolymerization	2	4	0.5	0.983618	0.132896	1	1	PTRN1_CAEEL	APR1_CAEEL
biological_process	GO:0009266	response to temperature stimulus	2	6	0.333333	0.979545	0.034832	1	1	DAF11_CAEEL	DAF25_CAEEL
biological_process	GO:0007506	gonadal mesoderm development	2	13	0.153846	0.625358	0.666146	1	1	MEP1_CAEEL	PAR3_CAEEL
molecular_function	GO:0016740	transferase activity	2	46	0.0434783	0.000409109	0.999678	0.04	1	SIR2_CAEEL	D3YT50_CAEEL
biological_process	GO:0016925	protein sumoylation	2	12	0.166667	0.674941	0.621299	1	1	ZHP3_CAEEL	GEI17_CAEEL
cellular_component	GO:0031083	BLOC-1 complex	2	8	0.25	0.907716	0.317714	1	1	BL1S6_CAEEL	BL1S2_CAEEL
biological_process	GO:0032418	lysosome localization	2	8	0.25	0.863894	0.397552	1	1	BL1S2_CAEEL	Q22368_CAEEL
cellular_component	GO:0030134	COPII-coated ER to Golgi transport vesicle	2	18	0.111111	0.999401	0.00203565	1	0.442	Q20913_CAEEL	Q2PJ77_CAEEL
molecular_function	GO:0004177	aminopeptidase activity	2	14	0.142857	0.772585	0.374619	1	1	O44183_CAEEL	U4PAP4_CAEEL
molecular_function	GO:0005523	tropomyosin binding	2	13	0.153846	0.656457	0.637167	1	1	TMOD_CAEEL	H2KYL9_CAEEL
biological_process	GO:0030239	myofibril assembly	2	7	0.285714	0.760836	0.346378	1	1	TMOD_CAEEL	UNC52_CAEEL
molecular_function	GO:0000030	mannosyltransferase activity	2	8	0.25	0.47653	0.779192	1	1	TMTC1_CAEEL	Q17515_CAEEL
biological_process	GO:0051781	positive regulation of cell division	2	8	0.25	0.980606	0.0699177	1	1	Q21216_CAEEL	A5JYS9_CAEEL
cellular_component	GO:0005763	mitochondrial small ribosomal subunit	2	28	0.0714286	0.218889	0.922994	1	1	RT24_CAEEL	P91862_CAEEL
biological_process	GO:0032508	DNA duplex unwinding	2	17	0.117647	0.411709	0.791035	1	1	DHX9_CAEEL	WRN_CAEEL
biological_process	GO:0006310	DNA recombination	2	23	0.0869565	0.191317	0.868622	1	1	WRN_CAEEL	Q9U2D2_CAEEL
biological_process	GO:0050976	detection of mechanical stimulus involved in sensory perception of touch	2	12	0.166667	0.625358	0.666146	1	1	MEC2_CAEEL	Q5ZR42_CAEEL
molecular_function	GO:0043023	ribosomal large subunit binding	2	8	0.25	0.878735	0.372191	1	1	Q9BKR5_CAEEL	Q20940_CAEEL
molecular_function	GO:0043022	ribosome binding	2	30	0.0666667	0.122083	0.963472	1	1	CPB3_CAEEL	GUF1_CAEEL
biological_process	GO:0093002	response to nematicide	2	11	0.181818	0.724561	0.571926	1	1	PGP1_CAEEL	Q17645_CAEEL
biological_process	GO:1990918	double-strand break repair involved in meiotic recombination	2	7	0.285714	0.90329	0.332191	1	1	SCC3_CAEEL	O62217_CAEEL
biological_process	GO:0007062	sister chromatid cohesion	2	10	0.2	0.661173	0.514244	1	1	SCC3_CAEEL	SMC1_CAEEL
biological_process	GO:0030031	cell projection assembly	2	10	0.2	0.549516	0.545957	1	1	CYFIP_CAEEL	Q19739_CAEEL
biological_process	GO:0030308	negative regulation of cell growth	2	3	0.666667	0.766141	0.436917	1	1	EGL4_CAEEL	E2AKA_CAEEL
cellular_component	GO:0031225	anchored component of membrane	2	6	0.333333	0.995921	0.0182763	1	0.992	EFN4_CAEEL	RIG6_CAEEL
biological_process	GO:0032968	positive regulation of transcription elongation from RNA polymerase II promoter	2	6	0.333333	0.93708	0.264911	1	1	SPT16_CAEEL	CDK12_CAEEL
cellular_component	GO:0005770	late endosome	2	27	0.0740741	0.363709	0.756465	1	1	G5EF63_CAEEL	Q23419_CAEEL
cellular_component	GO:0097433	dense body	2	3	0.666667	0.997135	0.0548108	1	1	SRBS1_CAEEL	VINC_CAEEL
biological_process	GO:1904262	negative regulation of TORC1 signaling	2	4	0.5	0.983618	0.132896	1	1	TRR1_CAEEL	ATM_CAEEL
biological_process	GO:0031053	primary miRNA processing	2	6	0.333333	0.82015	0.459753	1	1	U4PEM4_CAEEL	U4PRH5_CAEEL
cellular_component	GO:0070877	microprocessor complex	2	3	0.666667	0.997135	0.0548108	1	1	U4PEM4_CAEEL	U4PRH5_CAEEL
biological_process	GO:0006396	RNA processing	2	19	0.105263	6.77961e-05	0.999958	0.037	1	RM44_CAEEL	ADR1_CAEEL
biological_process	GO:0007409	axonogenesis	2	12	0.166667	1	7.99455e-09	1	0	VAB1_CAEEL	Q10915_CAEEL
cellular_component	GO:0000805	X chromosome	2	9	0.222222	0.875698	0.372975	1	1	SDC2_CAEEL	SDC3_CAEEL
biological_process	GO:0042464	dosage compensation by hypoactivation of X chromosome	2	10	0.2	0.903322	0.275439	1	1	SDC2_CAEEL	FOX1_CAEEL
biological_process	GO:0007530	sex determination	2	9	0.222222	0.511358	0.63782	1	1	SDC3_CAEEL	TRA2_CAEEL
cellular_component	GO:0030127	COPII vesicle coat	2	6	0.333333	0.959	0.205054	1	1	Q23368_CAEEL	G5EFY6_CAEEL
cellular_component	GO:0046540	U4/U6 x U5 tri-snRNP complex	2	21	0.0952381	0.409644	0.820955	1	1	NH2L1_CAEEL	Q93339_CAEEL
cellular_component	GO:0071144	heteromeric SMAD protein complex	2	6	0.333333	0.959	0.205054	1	1	DAF14_CAEEL	SMA4_CAEEL
molecular_function	GO:0070411	I-SMAD binding	2	6	0.333333	0.944649	0.245507	1	1	DAF14_CAEEL	SMA4_CAEEL
biological_process	GO:0030509	BMP signaling pathway	2	13	0.153846	0.325428	0.871472	1	1	DAF14_CAEEL	SMA4_CAEEL
biological_process	GO:0060395	SMAD protein signal transduction	2	11	0.181818	0.724561	0.571926	1	1	DAF14_CAEEL	SMA4_CAEEL
biological_process	GO:0010332	response to gamma radiation	2	5	0.4	0.87342	0.325059	1	1	TNKS1_CAEEL	PARG1_CAEEL
biological_process	GO:0030473	nuclear migration along microtubule	2	6	0.333333	0.93708	0.264911	1	1	TM201_CAEEL	KLC_CAEEL
molecular_function	GO:0015179	L-amino acid transmembrane transporter activity	2	16	0.125	0.186827	0.924656	1	1	SNF5_CAEEL	O44832_CAEEL
molecular_function	GO:0042800	histone methyltransferase activity (H3-K4 specific)	2	6	0.333333	0.944649	0.245507	1	1	G5EGI1_CAEEL	A0A168H365_CAEEL
biological_process	GO:0051568	histone H3-K4 methylation	2	15	0.133333	0.766141	0.436917	1	1	G5EGI1_CAEEL	A0A168H365_CAEEL
biological_process	GO:0007094	mitotic spindle assembly checkpoint signaling	2	14	0.142857	0.766172	0.470838	1	1	BUB1_CAEEL	G5EFM0_CAEEL
biological_process	GO:1905342	positive regulation of protein localization to kinetochore	2	7	0.285714	0.90329	0.332191	1	1	BUB1_CAEEL	ZYG1_CAEEL
molecular_function	GO:0003951	NAD+ kinase activity	2	22	0.0909091	0.295771	0.886561	1	1	Q9XXI6_CAEEL	Q9XXI5_CAEEL
biological_process	GO:0032786	positive regulation of DNA-templated transcription, elongation	2	7	0.285714	0.948126	0.159783	1	1	CCNT2_CAEEL	SIG7_CAEEL
biological_process	GO:0034243	regulation of transcription elongation from RNA polymerase II promoter	2	4	0.5	0.984303	0.0705661	1	1	HM24_CAEEL	CEH28_CAEEL
biological_process	GO:0040029	regulation of gene expression, epigenetic	2	6	0.333333	0.993103	0.0201189	1	1	MET2_CAEEL	MES2_CAEEL
biological_process	GO:0035435	phosphate ion transmembrane transport	2	16	0.125	0.440281	0.803958	1	1	A3QMC7_CAEEL	C0RSI9_CAEEL
biological_process	GO:0006627	protein processing involved in protein targeting to mitochondrion	2	7	0.285714	0.90329	0.332191	1	1	Q95PY9_CAEEL	A0A061ACY6_CAEEL
biological_process	GO:0050806	positive regulation of synaptic transmission	2	4	0.5	0.961553	0.0806182	1	1	RIM_CAEEL	G5ED46_CAEEL
biological_process	GO:0032224	positive regulation of synaptic transmission, cholinergic	2	11	0.181818	0.923871	0.174725	1	1	RIM_CAEEL	DMD_CAEEL
biological_process	GO:1905909	regulation of dauer entry	2	8	0.25	0.685866	0.559719	1	1	RIM_CAEEL	FOXO_CAEEL
molecular_function	GO:0005216	ion channel activity	2	18	0.111111	0.972533	0.0349591	1	1	UN105_CAEEL	Q8MPP4_CAEEL
biological_process	GO:0000027	ribosomal large subunit assembly	2	18	0.111111	0.399384	0.829376	1	1	L8E6W9_CAEEL	O61851_CAEEL
biological_process	GO:0071030	nuclear mRNA surveillance of spliceosomal pre-mRNA splicing	2	2	1	1	0.0280016	1	1	RENT1_CAEEL	SMG1_CAEEL
biological_process	GO:0045746	negative regulation of Notch signaling pathway	2	8	0.25	0.863894	0.397552	1	1	VAV_CAEEL	NBEA_CAEEL
molecular_function	GO:0031593	polyubiquitin modification-dependent protein binding	2	9	0.222222	0.700705	0.510461	1	1	UBQL_CAEEL	YO25_CAEEL
molecular_function	GO:0000049	tRNA binding	2	47	0.0425532	0.0138726	0.997188	0.928	1	Q9BKR5_CAEEL	Q9N4F1_CAEEL
biological_process	GO:0007091	metaphase/anaphase transition of mitotic cell cycle	2	5	0.4	0.769111	0.410044	1	1	APC1_CAEEL	CDC27_CAEEL
cellular_component	GO:0034703	cation channel complex	2	8	0.25	0.999339	0.00145358	1	0.323	CNG_CAEEL	UNC80_CAEEL
biological_process	GO:0009454	aerotaxis	2	5	0.4	0.96413	0.19758	1	1	CNG_CAEEL	GCY35_CAEEL
biological_process	GO:0055093	response to hyperoxia	2	5	0.4	0.96413	0.19758	1	1	CNG_CAEEL	GCY35_CAEEL
biological_process	GO:0010286	heat acclimation	2	12	0.166667	0.625358	0.666146	1	1	FOXO_CAEEL	MMPB_CAEEL
biological_process	GO:0001666	response to hypoxia	2	14	0.142857	0.685866	0.559719	1	1	CEP1_CAEEL	VPP1_CAEEL
molecular_function	GO:0003857	3-hydroxyacyl-CoA dehydrogenase activity	2	7	0.285714	0.795583	0.489481	1	1	O17762_CAEEL	A0A061AKU6_CAEEL
cellular_component	GO:0016581	NuRD complex	2	11	0.181818	0.802494	0.477159	1	1	DCP66_CAEEL	EGL27_CAEEL
cellular_component	GO:0030896	checkpoint clamp complex	2	4	0.5	0.989759	0.0993809	1	1	HPR9_CAEEL	A0A1W7LFZ8_CAEEL
biological_process	GO:0071479	cellular response to ionizing radiation	2	4	0.5	0.903322	0.275439	1	1	HPR9_CAEEL	DPOLQ_CAEEL
cellular_component	GO:0005905	clathrin-coated pit	2	6	0.333333	0.999096	0.00571764	1	0.832	LRP_CAEEL	PICAL_CAEEL
cellular_component	GO:0000421	autophagosome membrane	2	7	0.285714	0.935703	0.261357	1	1	LGG2_CAEEL	A16L2_CAEEL
molecular_function	GO:0050811	GABA receptor binding	2	4	0.5	0.985779	0.121812	1	1	Q8IA75_CAEEL	Q8IA76_CAEEL
biological_process	GO:0097352	autophagosome maturation	2	6	0.333333	0.863894	0.397552	1	1	LGG2_CAEEL	G5EF63_CAEEL
biological_process	GO:0048490	anterograde synaptic vesicle transport	2	4	0.5	0.90329	0.332191	1	1	O16637_CAEEL	Q95X88_CAEEL
molecular_function	GO:0051019	mitogen-activated protein kinase binding	2	6	0.333333	0.944649	0.245507	1	1	MAK1_CAEEL	GCK1_CAEEL
biological_process	GO:0035095	behavioral response to nicotine	2	6	0.333333	0.93708	0.264911	1	1	MAK1_CAEEL	UNC22_CAEEL
biological_process	GO:0048841	regulation of axon extension involved in axon guidance	2	9	0.222222	0.829719	0.355235	1	1	RPM1_CAEEL	LE756_CAEEL
biological_process	GO:0009058	biosynthetic process	2	25	0.08	0.00330631	0.997245	0.73	1	G5EE32_CAEEL	G5EGD0_CAEEL
biological_process	GO:0006749	glutathione metabolic process	2	73	0.0273973	5.53267e-05	0.999991	0.028	1	A0A9S2_CAEEL	U4PMK1_CAEEL
biological_process	GO:1901215	negative regulation of neuron death	2	8	0.25	0.724561	0.571926	1	1	LRK1_CAEEL	SKN1_CAEEL
molecular_function	GO:0032041	NAD-dependent histone deacetylase activity (H3-K14 specific)	2	5	0.4	0.968652	0.182122	1	1	HDA6_CAEEL	HDA4_CAEEL
molecular_function	GO:0033558	protein deacetylase activity	2	4	0.5	0.956998	0.139563	1	1	HDA6_CAEEL	A7LPD8_CAEEL
molecular_function	GO:0017070	U6 snRNA binding	2	5	0.4	0.968652	0.182122	1	1	PRP8_CAEEL	Q93339_CAEEL
biological_process	GO:0033962	P-body assembly	2	7	0.285714	0.674941	0.621299	1	1	CGH1_CAEEL	Q21740_CAEEL
biological_process	GO:0046688	response to copper ion	2	7	0.285714	0.909043	0.233828	1	1	VHP1_CAEEL	G5EBV3_CAEEL
molecular_function	GO:0016798	hydrolase activity, acting on glycosyl bonds	2	8	0.25	0.2521	0.825904	1	1	ASM1_CAEEL	Q22721_CAEEL
biological_process	GO:0051298	centrosome duplication	2	6	0.333333	0.889082	0.230889	1	1	ZYG1_CAEEL	ZYG9_CAEEL
molecular_function	GO:0016773	phosphotransferase activity, alcohol group as acceptor	2	7	0.285714	0.999997	3.98712e-06	1	0	YNE7_CAEEL	Q22721_CAEEL
biological_process	GO:0044331	cell-cell adhesion mediated by cadherin	2	3	0.666667	0.995317	0.0746394	1	1	HMR1_CAEEL	HMP1_CAEEL
biological_process	GO:0072375	medium-term memory	2	4	0.5	0.983618	0.132896	1	1	KCC2D_CAEEL	Q19523_CAEEL
biological_process	GO:0042427	serotonin biosynthetic process	2	10	0.2	0.674941	0.621299	1	1	KCC2D_CAEEL	LIM4_CAEEL
biological_process	GO:0001508	action potential	2	7	0.285714	0.529162	0.742869	1	1	ACM3_CAEEL	P90735_CAEEL
biological_process	GO:1904000	positive regulation of eating behavior	2	4	0.5	0.929434	0.226686	1	1	HLH6_CAEEL	MMPB_CAEEL
molecular_function	GO:0052689	carboxylic ester hydrolase activity	2	43	0.0465116	0.000896016	0.999767	0.117	1	EST1_CAEEL	ABH52_CAEEL
molecular_function	GO:0008483	transaminase activity	2	8	0.25	0.454033	0.760055	1	1	G5EE32_CAEEL	G5EGD0_CAEEL
molecular_function	GO:0004497	monooxygenase activity	2	52	0.0384615	0.0311742	0.984049	0.998	1	Q9N4Q5_CAEEL	A0A0K3AUW1_CAEEL
molecular_function	GO:0016705	oxidoreductase activity, acting on paired donors, with incorporation or reduction of molecular oxygen	2	40	0.05	0.0055558	0.997467	0.596	1	Q9N4Q5_CAEEL	A0A0K3AUW1_CAEEL
biological_process	GO:0006268	DNA unwinding involved in DNA replication	2	10	0.2	0.773314	0.518019	1	1	WRN_CAEEL	Q9XXI9_CAEEL
cellular_component	GO:0044666	MLL3/4 complex	2	11	0.181818	0.802494	0.477159	1	1	G5EGI1_CAEEL	Q9U370_CAEEL
molecular_function	GO:0031490	chromatin DNA binding	2	17	0.117647	0.192979	0.935088	1	1	Q9N368_CAEEL	Q8MXS6_CAEEL
biological_process	GO:0060290	transdifferentiation	2	10	0.2	0.903322	0.275439	1	1	SEM4_CAEEL	EGL27_CAEEL
molecular_function	GO:0003755	peptidyl-prolyl cis-trans isomerase activity	2	35	0.0571429	0.0665592	0.982518	1	1	SIG7_CAEEL	Q18445_CAEEL
molecular_function	GO:0030274	LIM domain binding	2	4	0.5	0.985779	0.121812	1	1	LIDB1_CAEEL	Q9U3E2_CAEEL
cellular_component	GO:0045335	phagocytic vesicle	2	16	0.125	0.452885	0.759271	1	1	CTNS_CAEEL	Q9XVL8_CAEEL
molecular_function	GO:0000340	RNA 7-methylguanosine cap binding	2	8	0.25	0.878735	0.372191	1	1	CYFIP_CAEEL	DCPS_CAEEL
biological_process	GO:0001556	oocyte maturation	2	19	0.105263	0.865897	0.253446	1	1	VAB1_CAEEL	HM18_CAEEL
biological_process	GO:1905516	positive regulation of fertilization	2	11	0.181818	0.724561	0.571926	1	1	SZY20_CAEEL	ATX2_CAEEL
molecular_function	GO:0004017	adenylate kinase activity	2	7	0.285714	0.914374	0.30946	1	1	KAD2_CAEEL	G5EC85_CAEEL
cellular_component	GO:0005637	nuclear inner membrane	2	20	0.1	0.846082	0.306473	1	1	SIR2_CAEEL	A0A0K3AR81_CAEEL
biological_process	GO:0007538	primary sex determination	2	3	0.666667	0.96895	0.136106	1	1	HM39_CAEEL	FOX1_CAEEL
molecular_function	GO:0004601	peroxidase activity	2	25	0.08	0.058728	0.984944	1	1	Q93204_CAEEL	O17241_CAEEL
biological_process	GO:0034605	cellular response to heat	2	4	0.5	0.948126	0.159783	1	1	FOXO_CAEEL	SMA9_CAEEL
biological_process	GO:1900426	positive regulation of defense response to bacterium	2	3	0.666667	0.995317	0.0746394	1	1	FOXO_CAEEL	VHP1_CAEEL
biological_process	GO:0010883	regulation of lipid storage	2	9	0.222222	0.399384	0.829376	1	1	FOXO_CAEEL	O44183_CAEEL
cellular_component	GO:0008023	transcription elongation factor complex	2	6	0.333333	0.995014	0.0159656	1	0.986	ELOA1_CAEEL	Q9N554_CAEEL
biological_process	GO:0006879	cellular iron ion homeostasis	2	13	0.153846	0.529162	0.742869	1	1	G4SRS5_CAEEL	A0A061ACG9_CAEEL
biological_process	GO:0097500	receptor localization to non-motile cilium	2	9	0.222222	0.82015	0.459753	1	1	DAF25_CAEEL	IF122_CAEEL
molecular_function	GO:0008568	microtubule-severing ATPase activity	2	5	0.4	0.968652	0.182122	1	1	YAO6_CAEEL	YF1M_CAEEL
biological_process	GO:0043054	dauer exit	2	10	0.2	0.773314	0.518019	1	1	HCF1_CAEEL	DAF25_CAEEL
biological_process	GO:0046686	response to cadmium ion	2	8	0.25	0.916352	0.201221	1	1	HCF1_CAEEL	VHP1_CAEEL
biological_process	GO:0032094	response to food	2	20	0.1	0.292449	0.888727	1	1	HLH2_CAEEL	MXL3_CAEEL
biological_process	GO:2000370	positive regulation of clathrin-dependent endocytosis	2	9	0.222222	0.82015	0.459753	1	1	CYFIP_CAEEL	CLH_CAEEL
cellular_component	GO:0008180	COP9 signalosome	2	7	0.285714	0.935703	0.261357	1	1	CSN2_CAEEL	CSN1_CAEEL
biological_process	GO:0060184	cell cycle switching	2	7	0.285714	0.87342	0.325059	1	1	CSN2_CAEEL	CSN1_CAEEL
biological_process	GO:1904667	negative regulation of ubiquitin protein ligase activity	2	7	0.285714	0.90329	0.332191	1	1	CSN2_CAEEL	CSN1_CAEEL
biological_process	GO:1905879	regulation of oogenesis	2	7	0.285714	0.99947	0.00233737	1	0.895	CSN2_CAEEL	CSN1_CAEEL
molecular_function	GO:0008375	acetylglucosaminyltransferase activity	2	11	0.181818	0.599177	0.612676	1	1	EXT2_CAEEL	BRE2_CAEEL
biological_process	GO:0007608	sensory perception of smell	2	11	0.181818	0.674941	0.621299	1	1	DAF11_CAEEL	MBK1_CAEEL
biological_process	GO:0042732	D-xylose metabolic process	2	4	0.5	0.983618	0.132896	1	1	DCXR_CAEEL	YNE7_CAEEL
biological_process	GO:0005997	xylulose metabolic process	2	2	1	1	0.0280016	1	1	DCXR_CAEEL	YNE7_CAEEL
cellular_component	GO:0030687	preribosome, large subunit precursor	2	26	0.0769231	0.240729	0.91286	1	1	L8E6W9_CAEEL	O61851_CAEEL
biological_process	GO:0042256	mature ribosome assembly	2	6	0.333333	0.93708	0.264911	1	1	CRI3_CAEEL	G5EDD9_CAEEL
biological_process	GO:1990440	positive regulation of transcription from RNA polymerase II promoter in response to endoplasmic reticulum stress	2	4	0.5	0.983618	0.132896	1	1	UBXN4_CAEEL	UBQL_CAEEL
biological_process	GO:0006990	positive regulation of transcription from RNA polymerase II promoter involved in unfolded protein response	2	4	0.5	0.983618	0.132896	1	1	SKN1_CAEEL	Q20435_CAEEL
molecular_function	GO:0016779	nucleotidyltransferase activity	2	34	0.0588235	0.445455	0.647545	1	1	GLD2_CAEEL	Q09409_CAEEL
molecular_function	GO:0046975	histone methyltransferase activity (H3-K36 specific)	2	7	0.285714	0.914374	0.30946	1	1	A4LBC3_CAEEL	A4LBC2_CAEEL
biological_process	GO:0018992	germ-line sex determination	2	8	0.25	0.455536	0.719777	1	1	TRA2_CAEEL	GLS1_CAEEL
biological_process	GO:0048599	oocyte development	2	14	0.142857	0.999025	0.00226591	1	0.888	MEP1_CAEEL	ATX2_CAEEL
biological_process	GO:0048589	developmental growth	2	5	0.4	0.999964	6.82201e-05	1	0.061	MOG5_CAEEL	DHX16_CAEEL
biological_process	GO:0006401	RNA catabolic process	2	13	0.153846	0.514639	0.572511	1	1	DCPS_CAEEL	Q965N3_CAEEL
biological_process	GO:0097376	interneuron axon guidance	2	5	0.4	0.96413	0.19758	1	1	DDRB_CAEEL	CELR_CAEEL
molecular_function	GO:0000987	cis-regulatory region sequence-specific DNA binding	2	7	0.285714	1	7.35128e-08	1	0	HIZR1_CAEEL	FKH5_CAEEL
biological_process	GO:0070125	mitochondrial translational elongation	2	6	0.333333	0.93708	0.264911	1	1	EFTS_CAEEL	RM44_CAEEL
cellular_component	GO:0000145	exocyst	2	9	0.222222	0.875698	0.372975	1	1	EXOC4_CAEEL	EXOC5_CAEEL
biological_process	GO:0090522	vesicle tethering involved in exocytosis	2	9	0.222222	0.82015	0.459753	1	1	EXOC4_CAEEL	EXOC5_CAEEL
cellular_component	GO:0005968	Rab-protein geranylgeranyltransferase complex	2	4	0.5	0.989759	0.0993809	1	1	REP1_CAEEL	Q9TYY0_CAEEL
biological_process	GO:0018344	protein geranylgeranylation	2	9	0.222222	0.82015	0.459753	1	1	REP1_CAEEL	Q9TYY0_CAEEL
cellular_component	GO:0000137	Golgi cis cisterna	2	2	1	1	0.0201804	1	1	GBF1_CAEEL	Q19989_CAEEL
cellular_component	GO:0044297	cell body	2	16	0.125	0.999056	0.00155493	1	0.33	G5ECM5_CAEEL	Q22354_CAEEL
cellular_component	GO:0030426	growth cone	2	6	0.333333	0.941397	0.197506	1	1	ANI1_CAEEL	O01847_CAEEL
biological_process	GO:0072344	rescue of stalled ribosome	2	6	0.333333	0.93708	0.264911	1	1	Q9BKR5_CAEEL	Q20940_CAEEL
cellular_component	GO:0098794	postsynapse	2	14	0.142857	0.974142	0.0450774	1	1	GBR1_CAEEL	Q95Q96_CAEEL
biological_process	GO:0010877	lipid transport involved in lipid storage	2	13	0.153846	0.625358	0.666146	1	1	GBR1_CAEEL	MADD_CAEEL
biological_process	GO:1904731	positive regulation of intestinal lipid absorption	2	7	0.285714	0.90329	0.332191	1	1	GBR1_CAEEL	MADD_CAEEL
biological_process	GO:0034514	mitochondrial unfolded protein response	2	15	0.133333	0.529162	0.742869	1	1	DVE1_CAEEL	DCP66_CAEEL
biological_process	GO:0051296	establishment of meiotic spindle orientation	2	5	0.4	0.96413	0.19758	1	1	DYHC_CAEEL	O17666_CAEEL
molecular_function	GO:0003827	alpha-1,3-mannosylglycoprotein 2-beta-N-acetylglucosaminyltransferase activity	2	3	0.666667	0.995963	0.0680164	1	1	MGAT1_CAEEL	G5EBG7_CAEEL
molecular_function	GO:0019799	tubulin N-acetyltransferase activity	2	3	0.666667	0.995963	0.0680164	1	1	ATAT1_CAEEL	W6RR23_CAEEL
biological_process	GO:0071929	alpha-tubulin acetylation	2	3	0.666667	0.995317	0.0746394	1	1	ATAT1_CAEEL	W6RR23_CAEEL
cellular_component	GO:0000307	cyclin-dependent protein kinase holoenzyme complex	2	25	0.08	0.393755	0.801288	1	1	CCNE_CAEEL	CDK12_CAEEL
molecular_function	GO:0016538	cyclin-dependent protein serine/threonine kinase regulator activity	2	30	0.0666667	0.0270968	0.993929	0.995	1	CCNT2_CAEEL	CCNE_CAEEL
molecular_function	GO:0001965	G-protein alpha-subunit binding	2	8	0.25	0.878735	0.372191	1	1	GBAS1_CAEEL	P91820_CAEEL
biological_process	GO:2000294	positive regulation of defecation	2	10	0.2	0.724561	0.571926	1	1	MADD_CAEEL	CBPE_CAEEL
molecular_function	GO:0070679	inositol 1,4,5 trisphosphate binding	2	8	0.25	0.878735	0.372191	1	1	Q8IA75_CAEEL	Q8IA76_CAEEL
molecular_function	GO:0017022	myosin binding	2	8	0.25	0.999504	0.00313399	1	0.771	UNC87_CAEEL	TTN1_CAEEL
biological_process	GO:0006413	translational initiation	2	14	0.142857	0.952128	0.0938559	1	1	EIF3D_CAEEL	EIF3L_CAEEL
biological_process	GO:0099636	cytoplasmic streaming	2	3	0.666667	0.995317	0.0746394	1	1	GLP1_CAEEL	CLAS2_CAEEL
biological_process	GO:1905938	positive regulation of germ cell proliferation	2	3	0.666667	0.995317	0.0746394	1	1	GLP1_CAEEL	ATX2_CAEEL
molecular_function	GO:0034046	poly(G) binding	2	3	0.666667	0.995963	0.0680164	1	1	LARP1_CAEEL	FOX1_CAEEL
cellular_component	GO:0000118	histone deacetylase complex	2	16	0.125	0.75619	0.40548	1	1	RCOR_CAEEL	HDA4_CAEEL
biological_process	GO:0016575	histone deacetylation	2	25	0.08	0.452124	0.739326	1	1	RCOR_CAEEL	HDA4_CAEEL
biological_process	GO:0070932	histone H3 deacetylation	2	6	0.333333	0.93708	0.264911	1	1	SIR2_CAEEL	D3YT50_CAEEL
biological_process	GO:0045595	regulation of cell differentiation	2	11	0.181818	1	7.71289e-13	1	0	APR1_CAEEL	MDL1_CAEEL
biological_process	GO:1990834	response to odorant	2	22	0.0909091	0.262101	0.90381	1	1	HSF1_CAEEL	EGL4_CAEEL
biological_process	GO:0030951	establishment or maintenance of microtubule cytoskeleton polarity	2	7	0.285714	0.90329	0.332191	1	1	ZYG9_CAEEL	Q17490_CAEEL
molecular_function	GO:0030371	translation repressor activity	2	6	0.333333	0.756672	0.480704	1	1	LIN41_CAEEL	NCL1_CAEEL
biological_process	GO:0045604	regulation of epidermal cell differentiation	2	3	0.666667	0.983618	0.132896	1	1	LIN41_CAEEL	U4PRH5_CAEEL
molecular_function	GO:0008417	fucosyltransferase activity	2	5	0.4	0.237097	0.877264	1	1	FUT8_CAEEL	FUTA_CAEEL
molecular_function	GO:0070878	primary miRNA binding	2	3	0.666667	0.995963	0.0680164	1	1	U4PEM4_CAEEL	U4PRH5_CAEEL
molecular_function	GO:0016208	AMP binding	2	18	0.111111	0.435782	0.806064	1	1	Q8I112_CAEEL	Q22022_CAEEL
molecular_function	GO:0008235	metalloexopeptidase activity	2	7	0.285714	0.889644	0.187107	1	1	ERP1B_CAEEL	G8JYE4_CAEEL
cellular_component	GO:0042765	GPI-anchor transamidase complex	2	15	0.133333	0.638876	0.65036	1	1	Q5WRN6_CAEEL	Q19518_CAEEL
biological_process	GO:0016255	attachment of GPI anchor to protein	2	15	0.133333	0.529162	0.742869	1	1	Q5WRN6_CAEEL	Q19518_CAEEL
cellular_component	GO:0016589	NURF complex	2	12	0.166667	0.762767	0.525144	1	1	H8ESF1_CAEEL	Q9XWN1_CAEEL
molecular_function	GO:0035064	methylated histone binding	2	29	0.0689655	0.273608	0.877917	1	1	ZFP1_CAEEL	Q9N576_CAEEL
biological_process	GO:1904811	positive regulation of dense core granule transport	2	8	0.25	0.82015	0.459753	1	1	DYHC_CAEEL	VPS53_CAEEL
biological_process	GO:0051965	positive regulation of synapse assembly	2	11	0.181818	0.933746	0.170281	1	1	RPM1_CAEEL	G5ED46_CAEEL
biological_process	GO:1904799	regulation of neuron remodeling	2	4	0.5	0.983618	0.132896	1	1	MYRF1_CAEEL	MYRF2_CAEEL
cellular_component	GO:0034464	BBSome	2	8	0.25	0.907716	0.317714	1	1	BBS1_CAEEL	PTHB1_CAEEL
molecular_function	GO:0005119	smoothened binding	2	3	0.666667	0.995963	0.0680164	1	1	BBS1_CAEEL	PTC3_CAEEL
molecular_function	GO:0005109	frizzled binding	2	8	0.25	0.878735	0.372191	1	1	CAM1_CAEEL	MIG5_CAEEL
cellular_component	GO:0070847	core mediator complex	2	9	0.222222	0.875698	0.372975	1	1	MED8_CAEEL	MED14_CAEEL
cellular_component	GO:0005859	muscle myosin complex	2	3	0.666667	0.997135	0.0548108	1	1	MYO2_CAEEL	MYO4_CAEEL
biological_process	GO:0010226	response to lithium ion	2	4	0.5	0.983618	0.132896	1	1	CHE1_CAEEL	GCY1_CAEEL
cellular_component	GO:0008024	cyclin/CDK positive transcription elongation factor complex	2	4	0.5	0.989759	0.0993809	1	1	CCNT2_CAEEL	CDK12_CAEEL
biological_process	GO:1901407	regulation of phosphorylation of RNA polymerase II C-terminal domain	2	4	0.5	0.983618	0.132896	1	1	CCNT2_CAEEL	SIG7_CAEEL
biological_process	GO:0008584	male gonad development	2	7	0.285714	0.90329	0.332191	1	1	Q9XVI2_CAEEL	Q95ZN3_CAEEL
cellular_component	GO:0031519	PcG protein complex	2	6	0.333333	0.875698	0.372975	1	1	MES2_CAEEL	RING2_CAEEL
biological_process	GO:0000338	protein deneddylation	2	7	0.285714	0.804271	0.423436	1	1	CSN2_CAEEL	CSN1_CAEEL
molecular_function	GO:0070122	isopeptidase activity	2	9	0.222222	0.750184	0.54274	1	1	PRP8_CAEEL	O61792_CAEEL
molecular_function	GO:0004301	epoxide hydrolase activity	2	7	0.285714	0.914374	0.30946	1	1	O44183_CAEEL	U4PAP4_CAEEL
biological_process	GO:0044255	cellular lipid metabolic process	2	12	0.166667	2.04497e-10	1	0	1	LIN29_CAEEL	Q9XXT5_CAEEL
molecular_function	GO:0004709	MAP kinase kinase kinase activity	2	7	0.285714	0.914374	0.30946	1	1	KRAF1_CAEEL	MOM4_CAEEL
biological_process	GO:0045292	mRNA cis splicing, via spliceosome	2	12	0.166667	0.766172	0.470838	1	1	CATIN_CAEEL	G5ECL3_CAEEL
cellular_component	GO:0030027	lamellipodium	2	6	0.333333	0.959	0.205054	1	1	Q9XUT0_CAEEL	Q21430_CAEEL
molecular_function	GO:0033592	RNA strand annealing activity	2	5	0.4	0.968652	0.182122	1	1	H2L0A8_CAEEL	Q9TXU2_CAEEL
biological_process	GO:0001709	cell fate determination	2	9	0.222222	0.984629	0.0347759	1	1	MIG5_CAEEL	O01521_CAEEL
molecular_function	GO:0004527	exonuclease activity	2	7	0.285714	0.347188	0.776783	1	1	PQE1_CAEEL	TYDP1_CAEEL
cellular_component	GO:0000502	proteasome complex	2	8	0.25	0.121922	0.954997	1	1	O61792_CAEEL	Q18983_CAEEL
molecular_function	GO:0031956	medium-chain fatty acid-CoA ligase activity	2	8	0.25	0.878735	0.372191	1	1	ACS7_CAEEL	Q9UAV8_CAEEL
biological_process	GO:0009062	fatty acid catabolic process	2	20	0.1	0.117811	0.933723	1	1	Q9U2I8_CAEEL	Q9XXT5_CAEEL
biological_process	GO:0048692	negative regulation of axon extension involved in regeneration	2	3	0.666667	0.995317	0.0746394	1	1	RPM1_CAEEL	VHP1_CAEEL
molecular_function	GO:0015276	ligand-gated ion channel activity	2	13	0.153846	0.992296	0.0118104	1	0.999	G5EEH3_CAEEL	E0AHC1_CAEEL
biological_process	GO:1903355	negative regulation of distal tip cell migration	2	3	0.666667	0.995317	0.0746394	1	1	MIG39_CAEEL	VAB3_CAEEL
biological_process	GO:0042771	intrinsic apoptotic signaling pathway in response to DNA damage by p53 class mediator	2	7	0.285714	0.90329	0.332191	1	1	CEP1_CAEEL	AKT1_CAEEL
biological_process	GO:0042770	signal transduction in response to DNA damage	2	2	1	0.94164	0.105658	1	1	CEP1_CAEEL	Q9GUP2_CAEEL
molecular_function	GO:0019887	protein kinase regulator activity	2	23	0.0869565	0.02708	0.98758	0.994	1	Q8I112_CAEEL	Q22022_CAEEL
molecular_function	GO:0008408	3'-5' exonuclease activity	2	12	0.166667	0.385351	0.762903	1	1	Q8T3E0_CAEEL	Q9U208_CAEEL
biological_process	GO:0030155	regulation of cell adhesion	2	8	0.25	0.999717	0.00126231	1	0.731	EFN4_CAEEL	VAB3_CAEEL
biological_process	GO:0030042	actin filament depolymerization	2	11	0.181818	0.999892	0.000394705	1	0.32	GELS1_CAEEL	O17939_CAEEL
cellular_component	GO:0035861	site of double-strand break	2	15	0.133333	0.638876	0.65036	1	1	SMC6_CAEEL	WRN_CAEEL
cellular_component	GO:1902712	G protein-coupled GABA receptor complex	2	2	1	1	0.0201804	1	1	GABR2_CAEEL	GABR1_CAEEL
cellular_component	GO:0038039	G protein-coupled receptor heterodimeric complex	2	4	0.5	0.989759	0.0993809	1	1	GABR2_CAEEL	GABR1_CAEEL
biological_process	GO:0032223	negative regulation of synaptic transmission, cholinergic	2	5	0.4	0.96413	0.19758	1	1	GABR2_CAEEL	GABR1_CAEEL
biological_process	GO:0008053	mitochondrial fusion	2	3	0.666667	0.983618	0.132896	1	1	Q18965_CAEEL	Q21096_CAEEL
molecular_function	GO:0010997	anaphase-promoting complex binding	2	5	0.4	0.968652	0.182122	1	1	A0A7R9SW82_CAEEL	Q09649_CAEEL
biological_process	GO:0006491	N-glycan processing	2	14	0.142857	0.576564	0.706598	1	1	MAN12_CAEEL	G5EC87_CAEEL
biological_process	GO:0008643	carbohydrate transport	2	31	0.0645161	0.0866106	0.966349	1	1	SRF3_CAEEL	G5EFD3_CAEEL
cellular_component	GO:0030991	intraciliary transport particle A	2	5	0.4	0.977102	0.150369	1	1	DYF2_CAEEL	IF122_CAEEL
biological_process	GO:0034497	protein localization to phagophore assembly site	2	6	0.333333	0.93708	0.264911	1	1	H2L043_CAEEL	Q9BI63_CAEEL
biological_process	GO:0035999	tetrahydrofolate interconversion	2	5	0.4	0.96413	0.19758	1	1	MTHR_CAEEL	Q21284_CAEEL
biological_process	GO:0006303	double-strand break repair via nonhomologous end joining	2	7	0.285714	0.96895	0.136106	1	1	Q8T3E0_CAEEL	Q9U2D2_CAEEL
biological_process	GO:0010212	response to ionizing radiation	2	7	0.285714	0.937778	0.134103	1	1	ATM_CAEEL	WRN_CAEEL
molecular_function	GO:0070034	telomerase RNA binding	2	5	0.4	0.968652	0.182122	1	1	Q1T6W7_CAEEL	Q9BL68_CAEEL
biological_process	GO:1904531	positive regulation of actin filament binding	2	2	1	1	0.0280016	1	1	EXC6_CAEEL	G5ECM5_CAEEL
molecular_function	GO:0004175	endopeptidase activity	2	9	0.222222	0.783597	0.263522	1	1	LPLT1_CAEEL	LPLT2_CAEEL
biological_process	GO:0097264	self proteolysis	2	2	1	1	0.0280016	1	1	LPLT1_CAEEL	LPLT2_CAEEL
cellular_component	GO:0042555	MCM complex	2	7	0.285714	0.935703	0.261357	1	1	Q9XXI9_CAEEL	Q9XVR7_CAEEL
biological_process	GO:0000727	double-strand break repair via break-induced replication	2	20	0.1	0.325428	0.871472	1	1	Q9XXI9_CAEEL	Q9XVR7_CAEEL
biological_process	GO:0060903	positive regulation of meiosis I	2	4	0.5	0.983618	0.132896	1	1	GLD2_CAEEL	ATX2_CAEEL
biological_process	GO:0006999	nuclear pore organization	2	7	0.285714	0.82015	0.459753	1	1	Q21295_CAEEL	Q21436_CAEEL
biological_process	GO:0072697	protein localization to cell cortex	2	3	0.666667	0.948126	0.159783	1	1	NCL1_CAEEL	Q19818_CAEEL
biological_process	GO:0050684	regulation of mRNA processing	2	4	0.5	0.465268	0.659774	1	1	DHX9_CAEEL	SPK1_CAEEL
biological_process	GO:0050982	detection of mechanical stimulus	2	3	0.666667	0.885149	0.273487	1	1	PIEZ1_CAEEL	PKD1_CAEEL
biological_process	GO:0048268	clathrin coat assembly	2	6	0.333333	0.93708	0.264911	1	1	PICAL_CAEEL	SLAP2_CAEEL
cellular_component	GO:0005795	Golgi stack	2	6	0.333333	0.971682	0.0615758	1	1	Q2EEM5_CAEEL	G5EGG0_CAEEL
biological_process	GO:1902975	mitotic DNA replication initiation	2	7	0.285714	0.90329	0.332191	1	1	Q9XXI9_CAEEL	Q9XVR7_CAEEL
molecular_function	GO:0048038	quinone binding	2	5	0.4	0.750184	0.54274	1	1	MIG38_CAEEL	Q19246_CAEEL
biological_process	GO:0010965	regulation of mitotic sister chromatid separation	2	2	1	0.824042	0.32335	1	1	NPP5_CAEEL	G5EFM0_CAEEL
biological_process	GO:0051664	nuclear pore localization	2	3	0.666667	0.995317	0.0746394	1	1	NUP98_CAEEL	G5EBQ3_CAEEL
biological_process	GO:0051983	regulation of chromosome segregation	2	3	0.666667	0.979749	0.0454908	1	1	IMA2_CAEEL	G5EGS8_CAEEL
biological_process	GO:1900182	positive regulation of protein localization to nucleus	2	11	0.181818	0.766172	0.470838	1	1	SMA9_CAEEL	VHP1_CAEEL
biological_process	GO:0043407	negative regulation of MAP kinase activity	2	4	0.5	0.983618	0.132896	1	1	SULU_CAEEL	GCK1_CAEEL
biological_process	GO:0031034	myosin filament assembly	2	3	0.666667	0.829719	0.355235	1	1	UNC87_CAEEL	UNC89_CAEEL
biological_process	GO:0050790	regulation of catalytic activity	2	19	0.105263	0.987985	0.0170177	1	1	Q8I112_CAEEL	Q22022_CAEEL
biological_process	GO:0016071	mRNA metabolic process	2	4	0.5	0.115688	0.908533	1	1	CGH1_CAEEL	FOX1_CAEEL
biological_process	GO:0034063	stress granule assembly	2	8	0.25	0.863894	0.397552	1	1	CGH1_CAEEL	ATX2_CAEEL
biological_process	GO:0048259	regulation of receptor-mediated endocytosis	2	3	0.666667	0.972161	0.0909571	1	1	CNT2_CAEEL	G5EF26_CAEEL
biological_process	GO:1903864	P granule disassembly	2	3	0.666667	0.995317	0.0746394	1	1	MBK2_CAEEL	Q21126_CAEEL
molecular_function	GO:0019902	phosphatase binding	2	7	0.285714	0.478375	0.700183	1	1	UNC89_CAEEL	CPNA1_CAEEL
biological_process	GO:0051963	regulation of synapse assembly	2	3	0.666667	0.970906	0.0664719	1	1	MYRF1_CAEEL	MYRF2_CAEEL
cellular_component	GO:0005891	voltage-gated calcium channel complex	2	29	0.0689655	0.198712	0.93201	1	1	G5EGL3_CAEEL	G5EG74_CAEEL
cellular_component	GO:1990112	RQC complex	2	4	0.5	0.989759	0.0993809	1	1	Q9BKR5_CAEEL	Q20940_CAEEL
biological_process	GO:1990116	ribosome-associated ubiquitin-dependent protein catabolic process	2	3	0.666667	0.995317	0.0746394	1	1	Q9BKR5_CAEEL	Q20940_CAEEL
cellular_component	GO:0044613	nuclear pore central transport channel	2	8	0.25	0.907716	0.317714	1	1	NXT1_CAEEL	Q21295_CAEEL
cellular_component	GO:1990429	peroxisomal importomer complex	2	3	0.666667	0.997135	0.0548108	1	1	PEX13_CAEEL	Q93930_CAEEL
biological_process	GO:0006476	protein deacetylation	2	5	0.4	0.389268	0.786532	1	1	SIR2_CAEEL	D3YT50_CAEEL
molecular_function	GO:0002039	p53 binding	2	4	0.5	0.985779	0.121812	1	1	SIR2_CAEEL	IASPP_CAEEL
biological_process	GO:0043970	histone H3-K9 acetylation	2	2	1	1	0.0280016	1	1	SIR2_CAEEL	D3YT50_CAEEL
biological_process	GO:0030719	P granule organization	2	8	0.25	0.997098	0.0114732	1	1	TG250_CAEEL	NUP98_CAEEL
biological_process	GO:0045989	positive regulation of striated muscle contraction	2	5	0.4	0.96413	0.19758	1	1	UNC89_CAEEL	UNC22_CAEEL
molecular_function	GO:0098882	structural constituent of presynaptic active zone	2	2	1	1	0.0253634	1	1	SPD5_CAEEL	O44490_CAEEL
molecular_function	GO:0008234	cysteine-type peptidase activity	2	15	0.133333	0.0536043	0.967338	1	1	Q9U2B2_CAEEL	A0A0S4XR45_CAEEL
biological_process	GO:0006265	DNA topological change	2	10	0.2	0.773314	0.518019	1	1	H1UBJ9_CAEEL	H1UBJ6_CAEEL
cellular_component	GO:0005844	polysome	2	14	0.142857	0.480477	0.774672	1	1	GLS1_CAEEL	GLD4_CAEEL
biological_process	GO:0048668	collateral sprouting	2	4	0.5	0.982134	0.0967102	1	1	SYG1_CAEEL	SYG2_CAEEL
biological_process	GO:0006986	response to unfolded protein	2	5	0.4	0.983397	0.0306508	1	1	UBXN4_CAEEL	VHP1_CAEEL
biological_process	GO:1904780	negative regulation of protein localization to centrosome	2	4	0.5	0.983618	0.132896	1	1	SZY20_CAEEL	ATX2_CAEEL
biological_process	GO:1903438	positive regulation of mitotic cytokinetic process	2	2	1	1	0.0280016	1	1	SZY20_CAEEL	ATX2_CAEEL
biological_process	GO:0048730	epidermis morphogenesis	2	14	0.142857	0.576564	0.706598	1	1	MIG5_CAEEL	G5EDD3_CAEEL
molecular_function	GO:0005459	UDP-galactose transmembrane transporter activity	2	17	0.117647	0.47653	0.779192	1	1	SRF3_CAEEL	G5EFD3_CAEEL
molecular_function	GO:0005462	UDP-N-acetylglucosamine transmembrane transporter activity	2	8	0.25	0.878735	0.372191	1	1	SRF3_CAEEL	G5EFD3_CAEEL
biological_process	GO:0072334	UDP-galactose transmembrane transport	2	6	0.333333	0.93708	0.264911	1	1	SRF3_CAEEL	G5EFD3_CAEEL
biological_process	GO:1990569	UDP-N-acetylglucosamine transmembrane transport	2	3	0.666667	0.995317	0.0746394	1	1	SRF3_CAEEL	G5EFD3_CAEEL
biological_process	GO:0046329	negative regulation of JNK cascade	2	2	1	1	0.0280016	1	1	RPM1_CAEEL	VHP1_CAEEL
biological_process	GO:1903753	negative regulation of p38MAPK cascade	2	2	1	1	0.0280016	1	1	RPM1_CAEEL	VHP1_CAEEL
molecular_function	GO:0005267	potassium channel activity	2	16	0.125	0.801826	0.255433	1	1	A0A4V0INX3_CAEEL	A0A4V0IKI8_CAEEL
molecular_function	GO:0045735	nutrient reservoir activity	2	6	0.333333	0.944649	0.245507	1	1	VIT2_CAEEL	VIT6_CAEEL
biological_process	GO:0046626	regulation of insulin receptor signaling pathway	2	3	0.666667	0.929434	0.226686	1	1	OSM3_CAEEL	IF122_CAEEL
biological_process	GO:0071108	protein K48-linked deubiquitination	2	6	0.333333	0.93708	0.264911	1	1	V6CM05_CAEEL	Q9N4T5_CAEEL
biological_process	GO:0016242	negative regulation of macroautophagy	2	2	1	0.93708	0.264911	1	1	SMG1_CAEEL	TOR_CAEEL
molecular_function	GO:0003916	DNA topoisomerase activity	2	4	0.5	0.750184	0.54274	1	1	H1UBJ9_CAEEL	H1UBJ6_CAEEL
molecular_function	GO:0003917	DNA topoisomerase type I (single strand cut, ATP-independent) activity	2	5	0.4	0.968652	0.182122	1	1	H1UBJ9_CAEEL	H1UBJ6_CAEEL
biological_process	GO:0048280	vesicle fusion with Golgi apparatus	2	11	0.181818	0.724561	0.571926	1	1	Q2EEM5_CAEEL	G5EGG0_CAEEL
biological_process	GO:0023041	neuronal signal transduction	2	6	0.333333	0.82015	0.459753	1	1	NPHP1_CAEEL	MACO1_CAEEL
biological_process	GO:0045687	positive regulation of glial cell differentiation	2	2	1	1	0.0280016	1	1	VAB3_CAEEL	HMX_CAEEL
cellular_component	GO:0005744	TIM23 mitochondrial import inner membrane translocase complex	2	9	0.222222	0.941397	0.197506	1	1	H2L085_CAEEL	Q9TXR7_CAEEL
biological_process	GO:0018095	protein polyglutamylation	2	5	0.4	0.96413	0.19758	1	1	TTLL9_CAEEL	TTC30_CAEEL
molecular_function	GO:0032051	clathrin light chain binding	2	3	0.666667	0.995963	0.0680164	1	1	SLAP2_CAEEL	CLH_CAEEL
biological_process	GO:0007624	ultradian rhythm	2	2	1	0.96895	0.136106	1	1	SLAP2_CAEEL	G5EGI5_CAEEL
biological_process	GO:0006996	organelle organization	2	4	0.5	1	2.44243e-19	1	0	ZDHCS_CAEEL	G5EDF9_CAEEL
biological_process	GO:0007020	microtubule nucleation	2	4	0.5	0.982134	0.0967102	1	1	O61208_CAEEL	Q8ITY3_CAEEL
molecular_function	GO:0003863	3-methyl-2-oxobutanoate dehydrogenase (2-methylpropanoyl-transferring) activity	2	2	1	1	0.0253634	1	1	ODBA_CAEEL	Q4A1S8_CAEEL
biological_process	GO:0009083	branched-chain amino acid catabolic process	2	7	0.285714	0.863894	0.397552	1	1	ODBA_CAEEL	Q4A1S8_CAEEL
cellular_component	GO:0005942	phosphatidylinositol 3-kinase complex	2	4	0.5	0.980844	0.0783264	1	1	PIKI1_CAEEL	G5EDP9_CAEEL
biological_process	GO:0016539	intein-mediated protein splicing	2	9	0.222222	0.82015	0.459753	1	1	WRT4_CAEEL	Q21835_CAEEL
biological_process	GO:0048211	Golgi vesicle docking	2	3	0.666667	0.995317	0.0746394	1	1	Q2EEM5_CAEEL	G5EGG0_CAEEL
biological_process	GO:0046331	lateral inhibition	2	3	0.666667	0.995317	0.0746394	1	1	MED29_CAEEL	G5EGS7_CAEEL
molecular_function	GO:0001217	DNA-binding transcription repressor activity	2	5	0.4	0.563804	0.715557	1	1	NFYA1_CAEEL	NFYA2_CAEEL
biological_process	GO:0000335	negative regulation of transposition, DNA-mediated	2	5	0.4	0.96413	0.19758	1	1	Q19672_CAEEL	Q58AA4_CAEEL
biological_process	GO:0016441	posttranscriptional gene silencing	2	3	0.666667	0.999967	9.25949e-05	1	0.075	Q19672_CAEEL	Q58AA4_CAEEL
biological_process	GO:0048563	post-embryonic animal organ morphogenesis	2	5	0.4	0.96413	0.19758	1	1	H1ZUX0_CAEEL	H1ZUX1_CAEEL
molecular_function	GO:0043024	ribosomal small subunit binding	2	8	0.25	0.878735	0.372191	1	1	H2L0A8_CAEEL	Q9TXU2_CAEEL
molecular_function	GO:0034057	RNA strand-exchange activity	2	4	0.5	0.985779	0.121812	1	1	H2L0A8_CAEEL	Q9TXU2_CAEEL
biological_process	GO:0097010	eukaryotic translation initiation factor 4F complex assembly	2	4	0.5	0.983618	0.132896	1	1	H2L0A8_CAEEL	Q9TXU2_CAEEL
biological_process	GO:0001731	formation of translation preinitiation complex	2	10	0.2	0.773314	0.518019	1	1	H2L0A8_CAEEL	Q9TXU2_CAEEL
biological_process	GO:0006895	Golgi to endosome transport	2	3	0.666667	0.995317	0.0746394	1	1	PAD1_CAEEL	Q8I7G0_CAEEL
biological_process	GO:1990170	stress response to cadmium ion	2	10	0.2	0.87342	0.325059	1	1	Q17645_CAEEL	Q20331_CAEEL
cellular_component	GO:1990072	TRAPPIII protein complex	2	4	0.5	0.989759	0.0993809	1	1	H2L043_CAEEL	Q9BI63_CAEEL
biological_process	GO:0048842	positive regulation of axon extension involved in axon guidance	2	2	1	1	0.0280016	1	1	UNC53_CAEEL	RIG6_CAEEL
biological_process	GO:0051865	protein autoubiquitination	2	7	0.285714	0.90329	0.332191	1	1	YQDA_CAEEL	UBE4_CAEEL
cellular_component	GO:0072546	EMC complex	2	12	0.166667	0.762767	0.525144	1	1	H2L0C0_CAEEL	Q9XWP1_CAEEL
biological_process	GO:0035194	post-transcriptional gene silencing by RNA	2	2	1	0.999967	9.25949e-05	1	0.075	YQ12_CAEEL	Q18633_CAEEL
biological_process	GO:1903363	negative regulation of cellular protein catabolic process	2	2	1	0.983618	0.132896	1	1	RIC1_CAEEL	GEI17_CAEEL
biological_process	GO:0006589	octopamine biosynthetic process	2	2	1	1	0.0280016	1	1	TDC1_CAEEL	TBH1_CAEEL
biological_process	GO:0048024	regulation of mRNA splicing, via spliceosome	2	15	0.133333	0.306365	0.808793	1	1	ASD2_CAEEL	GLD1_CAEEL
cellular_component	GO:0000938	GARP complex	2	6	0.333333	0.959	0.205054	1	1	VPS54_CAEEL	VPS53_CAEEL
cellular_component	GO:0044292	dendrite terminus	2	6	0.333333	0.959	0.205054	1	1	AJM1_CAEEL	Q21303_CAEEL
cellular_component	GO:0044306	neuron projection terminus	2	5	0.4	0.981724	0.065105	1	1	GCY23_CAEEL	GCY8_CAEEL
biological_process	GO:1904779	regulation of protein localization to centrosome	2	2	1	0.995318	0.03105	1	1	ZYG1_CAEEL	ATX2_CAEEL
biological_process	GO:0046785	microtubule polymerization	2	8	0.25	0.995153	0.0160257	1	1	ZYG9_CAEEL	CLAS2_CAEEL
biological_process	GO:0007051	spindle organization	2	2	1	0.999999	1.81901e-06	1	0.001	ZYG9_CAEEL	O17666_CAEEL
cellular_component	GO:0030122	AP-2 adaptor complex	2	4	0.5	0.989759	0.0993809	1	1	AP2M_CAEEL	Q22601_CAEEL
biological_process	GO:0018230	peptidyl-L-cysteine S-palmitoylation	2	17	0.117647	0.440281	0.803958	1	1	ZDHCS_CAEEL	Q9U2K0_CAEEL
molecular_function	GO:0047485	protein N-terminus binding	2	5	0.4	0.968652	0.182122	1	1	NLK_CAEEL	APR1_CAEEL
molecular_function	GO:0140326	ATPase-coupled intramembrane lipid transporter activity	2	12	0.166667	0.703529	0.591994	1	1	Q9TXV2_CAEEL	U4PBV8_CAEEL
biological_process	GO:0045332	phospholipid translocation	2	13	0.153846	0.519482	0.6846	1	1	Q9TXV2_CAEEL	U4PBV8_CAEEL
molecular_function	GO:0017017	MAP kinase tyrosine/serine/threonine phosphatase activity	2	5	0.4	0.968652	0.182122	1	1	VHP1_CAEEL	A0A2C9C380_CAEEL
cellular_component	GO:0032433	filopodium tip	2	3	0.666667	0.997135	0.0548108	1	1	G5EG53_CAEEL	H2L0C7_CAEEL
biological_process	GO:0007389	pattern specification process	2	6	0.333333	0.999696	0.000624615	1	0.429	APR1_CAEEL	G5EGE2_CAEEL
molecular_function	GO:0000995	RNA polymerase III general transcription initiation factor activity	2	3	0.666667	0.995963	0.0680164	1	1	A0A131MCT5_CAEEL	A0A131MBG0_CAEEL
molecular_function	GO:0004500	dopamine beta-monooxygenase activity	2	2	1	1	0.0253634	1	1	TBH1_CAEEL	A0A0K3ATC0_CAEEL
cellular_component	GO:0000813	ESCRT I complex	2	10	0.2	0.840376	0.426313	1	1	O44158_CAEEL	Q17687_CAEEL
biological_process	GO:0032801	receptor catabolic process	2	4	0.5	0.983618	0.132896	1	1	O44158_CAEEL	Q17687_CAEEL
biological_process	GO:0071947	protein deubiquitination involved in ubiquitin-dependent protein catabolic process	2	3	0.666667	0.995317	0.0746394	1	1	V6CM05_CAEEL	Q9N4T5_CAEEL
biological_process	GO:0070897	transcription preinitiation complex assembly	2	3	0.666667	0.797904	0.374213	1	1	A0A131MCT5_CAEEL	A0A131MBG0_CAEEL
biological_process	GO:1904807	negative regulation of protein oxidation	2	2	1	1	0.0280016	1	1	VIT6_CAEEL	MMPB_CAEEL
biological_process	GO:1903427	negative regulation of reactive oxygen species biosynthetic process	2	2	1	1	0.0280016	1	1	VIT6_CAEEL	MMPB_CAEEL
biological_process	GO:1904109	positive regulation of cholesterol import	2	2	1	1	0.0280016	1	1	VIT6_CAEEL	MMPB_CAEEL
biological_process	GO:0007213	G protein-coupled acetylcholine receptor signaling pathway	2	9	0.222222	0.82015	0.459753	1	1	ACM3_CAEEL	ACM1_CAEEL
biological_process	GO:1902474	positive regulation of protein localization to synapse	2	5	0.4	0.93708	0.264911	1	1	ACM3_CAEEL	O61528_CAEEL
biological_process	GO:0010447	response to acidic pH	2	2	1	0.983618	0.132896	1	1	DEG1_CAEEL	P91102_CAEEL
biological_process	GO:2000249	regulation of actin cytoskeleton reorganization	2	2	1	0.995317	0.0746394	1	1	ADD1_CAEEL	G8JYB0_CAEEL
molecular_function	GO:0008307	structural constituent of muscle	2	12	0.166667	0.703529	0.591994	1	1	MYO4_CAEEL	DYC1_CAEEL
cellular_component	GO:0016602	CCAAT-binding factor complex	2	4	0.5	0.989759	0.0993809	1	1	NFYA1_CAEEL	NFYA2_CAEEL
biological_process	GO:0033314	mitotic DNA replication checkpoint signaling	2	11	0.181818	0.724561	0.571926	1	1	CHK1_CAEEL	Q20129_CAEEL
biological_process	GO:0045943	positive regulation of transcription by RNA polymerase I	2	3	0.666667	0.995317	0.0746394	1	1	HEAT1_CAEEL	O01598_CAEEL
molecular_function	GO:0004694	eukaryotic translation initiation factor 2alpha kinase activity	2	3	0.666667	0.995963	0.0680164	1	1	E2AKA_CAEEL	Q9NAK3_CAEEL
biological_process	GO:0045947	negative regulation of translational initiation	2	6	0.333333	0.93708	0.264911	1	1	E2AKA_CAEEL	Q17740_CAEEL
cellular_component	GO:0008622	epsilon DNA polymerase complex	2	4	0.5	0.989759	0.0993809	1	1	DPOE2_CAEEL	O62218_CAEEL
biological_process	GO:0006287	base-excision repair, gap-filling	2	3	0.666667	0.995317	0.0746394	1	1	DPOLQ_CAEEL	O62218_CAEEL
molecular_function	GO:0004029	aldehyde dehydrogenase (NAD+) activity	2	14	0.142857	0.609684	0.678309	1	1	Q8MNS6_CAEEL	Q20352_CAEEL
cellular_component	GO:0030015	CCR4-NOT core complex	2	11	0.181818	0.802494	0.477159	1	1	CNOT1_CAEEL	G5EFX8_CAEEL
biological_process	GO:0097091	synaptic vesicle clustering	2	3	0.666667	0.995317	0.0746394	1	1	CLA1_CAEEL	G5EEN3_CAEEL
cellular_component	GO:0045180	basal cortex	2	3	0.666667	0.997135	0.0548108	1	1	CLAP3_CAEEL	CLAS2_CAEEL
biological_process	GO:0031134	sister chromatid biorientation	2	2	1	1	0.0280016	1	1	CLAS2_CAEEL	O76447_CAEEL
cellular_component	GO:0030132	clathrin coat of coated pit	2	3	0.666667	0.999057	0.00993582	1	0.946	CLH_CAEEL	Q9BIF4_CAEEL
biological_process	GO:0030716	oocyte fate determination	2	3	0.666667	0.995317	0.0746394	1	1	GLD1_CAEEL	ATX2_CAEEL
biological_process	GO:2000196	positive regulation of female gonad development	2	2	1	1	0.0280016	1	1	GLD1_CAEEL	ATX2_CAEEL
molecular_function	GO:0004652	polynucleotide adenylyltransferase activity	2	11	0.181818	0.519296	0.749107	1	1	GLD2_CAEEL	GLD4_CAEEL
biological_process	GO:0045840	positive regulation of mitotic nuclear division	2	3	0.666667	0.903322	0.275439	1	1	GLD2_CAEEL	P90786_CAEEL
biological_process	GO:0045836	positive regulation of meiotic nuclear division	2	5	0.4	0.997518	0.0156969	1	1	O18218_CAEEL	O62486_CAEEL
molecular_function	GO:0004890	GABA-A receptor activity	2	5	0.4	0.968652	0.182122	1	1	G5EBQ0_CAEEL	U4PM48_CAEEL
biological_process	GO:0051446	positive regulation of meiotic cell cycle	2	4	0.5	0.993103	0.0201189	1	1	G5EGQ2_CAEEL	G5EGG3_CAEEL
biological_process	GO:0080135	regulation of cellular response to stress	2	2	1	0.574477	0.531516	1	1	DCA11_CAEEL	C6KRL4_CAEEL
cellular_component	GO:0016442	RISC complex	2	8	0.25	0.907716	0.317714	1	1	G5EES3_CAEEL	G5EGR6_CAEEL
cellular_component	GO:0022626	cytosolic ribosome	2	3	0.666667	0.000186079	0.999976	0.017	1	ADR1_CAEEL	Q20306_CAEEL
molecular_function	GO:0017128	phospholipid scramblase activity	2	13	0.153846	0.656457	0.637167	1	1	CED8_CAEEL	G5EG07_CAEEL
biological_process	GO:0031204	posttranslational protein targeting to membrane, translocation	2	7	0.285714	0.90329	0.332191	1	1	Q9U1V9_CAEEL	Q9U1W0_CAEEL
biological_process	GO:0044773	mitotic DNA damage checkpoint signaling	2	4	0.5	0.739138	0.445564	1	1	CHK2_CAEEL	A4F324_CAEEL
cellular_component	GO:0005697	telomerase holoenzyme complex	2	4	0.5	0.977102	0.150369	1	1	Q1T6W7_CAEEL	Q9BL68_CAEEL
molecular_function	GO:0004972	NMDA glutamate receptor activity	2	3	0.666667	0.995963	0.0680164	1	1	G5EEH3_CAEEL	E0AHC1_CAEEL
cellular_component	GO:0045120	pronucleus	2	5	0.4	0.959	0.205054	1	1	Q9XXI9_CAEEL	Q9XVR7_CAEEL
biological_process	GO:0003388	neuron development involved in amphid sensory organ development	2	3	0.666667	0.991179	0.0629199	1	1	G5EGE2_CAEEL	A0A131MCL4_CAEEL
molecular_function	GO:0047690	aspartyltransferase activity	2	3	0.666667	0.995963	0.0680164	1	1	Q19019_CAEEL	Q95ZR5_CAEEL
molecular_function	GO:0001784	phosphotyrosine residue binding	2	3	0.666667	0.995963	0.0680164	1	1	Q19019_CAEEL	Q95ZR5_CAEEL
biological_process	GO:0007175	negative regulation of epidermal growth factor-activated receptor activity	2	3	0.666667	0.995317	0.0746394	1	1	Q19019_CAEEL	Q95ZR5_CAEEL
cellular_component	GO:0000923	equatorial microtubule organizing center	2	2	1	1	0.0201804	1	1	O61208_CAEEL	Q8ITY3_CAEEL
cellular_component	GO:0008275	gamma-tubulin small complex	2	2	1	1	0.0201804	1	1	O61208_CAEEL	Q8ITY3_CAEEL
biological_process	GO:0006878	cellular copper ion homeostasis	2	19	0.105263	0.361076	0.851782	1	1	Q6BEW1_CAEEL	P91284_CAEEL
molecular_function	GO:0008429	phosphatidylethanolamine binding	2	5	0.4	0.968652	0.182122	1	1	Q27512_CAEEL	Q7JMT5_CAEEL
molecular_function	GO:0043176	amine binding	2	2	1	0.995963	0.0680164	1	1	G5ECV2_CAEEL	O17470_CAEEL
molecular_function	GO:0051378	serotonin binding	2	3	0.666667	0.995963	0.0680164	1	1	G5ECV2_CAEEL	O17470_CAEEL
cellular_component	GO:0030175	filopodium	2	5	0.4	0.997781	0.017653	1	0.99	G5EBK3_CAEEL	G5EES2_CAEEL
cellular_component	GO:0031974	membrane-enclosed lumen	2	2	1	0.740401	0.292119	1	1	G5EBK3_CAEEL	G5EES2_CAEEL
biological_process	GO:1902966	positive regulation of protein localization to early endosome	2	2	1	1	0.0280016	1	1	G5EBK3_CAEEL	G5EES2_CAEEL
biological_process	GO:1902115	regulation of organelle assembly	2	2	1	0.970708	0.0621333	1	1	G5EBK3_CAEEL	G5EES2_CAEEL
biological_process	GO:0035148	tube formation	2	3	0.666667	0.983618	0.132896	1	1	G5EBK3_CAEEL	G5EES2_CAEEL
biological_process	GO:0098943	neurotransmitter receptor transport, postsynaptic endosome to lysosome	2	3	0.666667	0.995317	0.0746394	1	1	O16637_CAEEL	Q95X88_CAEEL
cellular_component	GO:0019185	snRNA-activating protein complex	2	9	0.222222	0.875698	0.372975	1	1	Q7JNN6_CAEEL	Q22950_CAEEL
biological_process	GO:0042795	snRNA transcription by RNA polymerase II	2	9	0.222222	0.82015	0.459753	1	1	Q7JNN6_CAEEL	Q22950_CAEEL
biological_process	GO:0042796	snRNA transcription by RNA polymerase III	2	9	0.222222	0.82015	0.459753	1	1	Q7JNN6_CAEEL	Q22950_CAEEL
cellular_component	GO:0031588	nucleotide-activated protein kinase complex	2	18	0.111111	0.518296	0.747814	1	1	Q8I112_CAEEL	Q22022_CAEEL
cellular_component	GO:0016586	RSC-type complex	2	2	1	1	0.0201804	1	1	G5EEY5_CAEEL	Q565A2_CAEEL
molecular_function	GO:0005375	copper ion transmembrane transporter activity	2	17	0.117647	0.435782	0.806064	1	1	Q6BEW1_CAEEL	P91284_CAEEL
biological_process	GO:0034453	microtubule anchoring	2	3	0.666667	0.96413	0.19758	1	1	A0A2U9ZY79_CAEEL	G5EFE3_CAEEL
molecular_function	GO:0047105	4-trimethylammoniobutyraldehyde dehydrogenase activity	2	4	0.5	0.985779	0.121812	1	1	Q8MNS6_CAEEL	Q20352_CAEEL
molecular_function	GO:0019145	aminobutyraldehyde dehydrogenase activity	2	4	0.5	0.985779	0.121812	1	1	Q8MNS6_CAEEL	Q20352_CAEEL
molecular_function	GO:0016716	oxidoreductase activity, acting on paired donors, with incorporation or reduction of molecular oxygen, another compound as one donor, and incorporation of one atom of oxygen	2	2	1	1	0.0253634	1	1	Q95XC6_CAEEL	O01497_CAEEL
molecular_function	GO:0015616	DNA translocase activity	2	3	0.666667	0.995963	0.0680164	1	1	Q9U2S8_CAEEL	D3NQA7_CAEEL
molecular_function	GO:0070530	K63-linked polyubiquitin modification-dependent protein binding	2	9	0.222222	0.838779	0.432468	1	1	V6CM05_CAEEL	Q9N4T5_CAEEL
molecular_function	GO:0004827	proline-tRNA ligase activity	2	7	0.285714	0.914374	0.30946	1	1	O45869_CAEEL	Q23315_CAEEL
biological_process	GO:0006433	prolyl-tRNA aminoacylation	2	7	0.285714	0.90329	0.332191	1	1	O45869_CAEEL	Q23315_CAEEL
biological_process	GO:0050793	regulation of developmental process	2	9	0.222222	1	1.59482e-14	1	0	A0A4V6M3C5_CAEEL	A0A4V0IK80_CAEEL
biological_process	GO:0051239	regulation of multicellular organismal process	2	9	0.222222	1	1.07938e-07	1	0	A0A4V6M3C5_CAEEL	A0A4V0IK80_CAEEL
biological_process	GO:0035332	positive regulation of hippo signaling	2	2	1	1	0.0280016	1	1	Q9XXK4_CAEEL	Q20079_CAEEL
biological_process	GO:0097355	protein localization to heterochromatin	2	4	0.5	0.983618	0.132896	1	1	Q9U203_CAEEL	Q9U202_CAEEL
biological_process	GO:0043162	ubiquitin-dependent protein catabolic process via the multivesicular body sorting pathway	2	8	0.25	0.625358	0.666146	1	1	H8ESG1_CAEEL	O44158_CAEEL
cellular_component	GO:0030123	AP-3 adaptor complex	2	5	0.4	0.977102	0.150369	1	1	O16637_CAEEL	Q95X88_CAEEL
cellular_component	GO:0098830	presynaptic endosome	2	2	1	1	0.0201804	1	1	O16637_CAEEL	Q95X88_CAEEL
biological_process	GO:0016182	synaptic vesicle budding from endosome	2	2	1	1	0.0280016	1	1	O16637_CAEEL	Q95X88_CAEEL
biological_process	GO:0048499	synaptic vesicle membrane organization	2	2	1	0.929434	0.226686	1	1	O16637_CAEEL	Q95X88_CAEEL
cellular_component	GO:0097629	extrinsic component of omegasome membrane	2	3	0.666667	0.997135	0.0548108	1	1	H1UBJ1_CAEEL	Q9XWQ4_CAEEL
cellular_component	GO:0097632	extrinsic component of phagophore assembly site membrane	2	3	0.666667	0.997135	0.0548108	1	1	H1UBJ1_CAEEL	Q9XWQ4_CAEEL
cellular_component	GO:0035032	phosphatidylinositol 3-kinase complex, class III	2	3	0.666667	0.907716	0.317714	1	1	H1UBJ1_CAEEL	Q9XWQ4_CAEEL
biological_process	GO:0043552	positive regulation of phosphatidylinositol 3-kinase activity	2	3	0.666667	0.995317	0.0746394	1	1	H1UBJ1_CAEEL	Q9XWQ4_CAEEL
biological_process	GO:0045056	transcytosis	2	2	1	1	0.0280016	1	1	Q2EEM5_CAEEL	G5EGG0_CAEEL
molecular_function	GO:0015254	glycerol channel activity	2	14	0.142857	0.609684	0.678309	1	1	A0A131MBS2_CAEEL	Q9XW36_CAEEL
biological_process	GO:0015793	glycerol transport	2	14	0.142857	0.576564	0.706598	1	1	A0A131MBS2_CAEEL	Q9XW36_CAEEL
biological_process	GO:0070536	protein K63-linked deubiquitination	2	5	0.4	0.96413	0.19758	1	1	V6CM05_CAEEL	Q9N4T5_CAEEL
molecular_function	GO:0017168	5-oxoprolinase (ATP-hydrolyzing) activity	2	3	0.666667	0.995963	0.0680164	1	1	A0A9S2_CAEEL	U4PMK1_CAEEL
biological_process	GO:0090110	COPII-coated vesicle cargo loading	2	4	0.5	0.983618	0.132896	1	1	Q23368_CAEEL	G5EFY6_CAEEL
cellular_component	GO:0034245	mitochondrial DNA-directed RNA polymerase complex	2	2	1	1	0.0201804	1	1	Q8WQA3_CAEEL	A5PEY3_CAEEL
molecular_function	GO:0001018	mitochondrial promoter sequence-specific DNA binding	2	2	1	1	0.0253634	1	1	Q8WQA3_CAEEL	A5PEY3_CAEEL
biological_process	GO:0006390	mitochondrial transcription	2	3	0.666667	0.93708	0.264911	1	1	Q8WQA3_CAEEL	A5PEY3_CAEEL
molecular_function	GO:0004315	3-oxoacyl-[acyl-carrier-protein] synthase activity	2	5	0.4	0.968652	0.182122	1	1	A0A1C3NSM6_CAEEL	Q18559_CAEEL
biological_process	GO:0072383	plus-end-directed vesicle transport along microtubule	2	2	1	1	0.0280016	1	1	Q8MQ20_CAEEL	Q20888_CAEEL
molecular_function	GO:0005052	peroxisome matrix targeting signal-1 binding	2	2	1	1	0.0253634	1	1	Q18426_CAEEL	Q7JM90_CAEEL
molecular_function	GO:0000268	peroxisome targeting sequence binding	2	2	1	0.995963	0.0680164	1	1	Q18426_CAEEL	Q7JM90_CAEEL
molecular_function	GO:0004458	D-lactate dehydrogenase (cytochrome) activity	2	3	0.666667	0.995963	0.0680164	1	1	Q7JLJ0_CAEEL	Q8I4K2_CAEEL
molecular_function	GO:0008720	D-lactate dehydrogenase activity	2	3	0.666667	0.995963	0.0680164	1	1	Q7JLJ0_CAEEL	Q8I4K2_CAEEL
biological_process	GO:1903457	lactate catabolic process	2	3	0.666667	0.995317	0.0746394	1	1	Q7JLJ0_CAEEL	Q8I4K2_CAEEL
cellular_component	GO:0097149	centralspindlin complex	2	3	0.666667	0.997135	0.0548108	1	1	Q8MQ04_CAEEL	Q8MQ03_CAEEL
biological_process	GO:0035871	protein K11-linked deubiquitination	2	2	1	1	0.0280016	1	1	V6CM05_CAEEL	Q9N4T5_CAEEL
cellular_component	GO:1990071	TRAPPII protein complex	2	4	0.5	0.989759	0.0993809	1	1	B1V899_CAEEL	H2L0P2_CAEEL
molecular_function	GO:0061513	glucose 6-phosphate:inorganic phosphate antiporter activity	2	3	0.666667	0.995963	0.0680164	1	1	A3QMC7_CAEEL	C0RSI9_CAEEL
biological_process	GO:0015760	glucose-6-phosphate transport	2	3	0.666667	0.995317	0.0746394	1	1	A3QMC7_CAEEL	C0RSI9_CAEEL
cellular_component	GO:0000126	transcription factor TFIIIB complex	2	3	0.666667	0.997135	0.0548108	1	1	A0A131MCT5_CAEEL	A0A131MBG0_CAEEL
biological_process	GO:0006741	NADP biosynthetic process	2	3	0.666667	0.995317	0.0746394	1	1	Q9XXI6_CAEEL	Q9XXI5_CAEEL
molecular_function	GO:0004016	adenylate cyclase activity	2	4	0.5	0.985779	0.121812	1	1	Q19523_CAEEL	G5EE33_CAEEL
biological_process	GO:0009954	proximal/distal pattern formation	2	2	1	0.96895	0.136106	1	1	Q9XVI2_CAEEL	Q95ZN3_CAEEL
biological_process	GO:0010970	transport along microtubule	2	2	1	0.99483	0.0119518	1	1	O45087_CAEEL	A0A486WV95_CAEEL
molecular_function	GO:0043395	heparan sulfate proteoglycan binding	2	4	0.5	0.985779	0.121812	1	1	Q27512_CAEEL	Q7JMT5_CAEEL
molecular_function	GO:0016295	myristoyl-[acyl-carrier-protein] hydrolase activity	2	3	0.666667	0.995963	0.0680164	1	1	A0A1C3NSM6_CAEEL	Q18559_CAEEL
molecular_function	GO:0004320	oleoyl-[acyl-carrier-protein] hydrolase activity	2	3	0.666667	0.995963	0.0680164	1	1	A0A1C3NSM6_CAEEL	Q18559_CAEEL
molecular_function	GO:0016296	palmitoyl-[acyl-carrier-protein] hydrolase activity	2	3	0.666667	0.995963	0.0680164	1	1	A0A1C3NSM6_CAEEL	Q18559_CAEEL
biological_process	GO:0061098	positive regulation of protein tyrosine kinase activity	2	2	1	1	0.0280016	1	1	H2KZ93_CAEEL	C6KRG5_CAEEL
biological_process	GO:0097320	plasma membrane tubulation	2	2	1	1	0.00468267	1	0.996	Q09989_CAEEL	Q6AHQ8_CAEEL
biological_process	GO:0006099	tricarboxylic acid cycle	1	30	0.0333333	0.0287304	0.995924	1	1	FUMH_CAEEL
molecular_function	GO:0004693	cyclin-dependent protein serine/threonine kinase activity	1	16	0.0625	0.250893	0.937832	1	1	CDK12_CAEEL
biological_process	GO:0007346	regulation of mitotic cell cycle	1	12	0.0833333	0.629075	0.465233	1	1	EGL43_CAEEL
biological_process	GO:0007618	mating	1	2	0.5	0.934635	0.118819	1	1	MADD_CAEEL
biological_process	GO:0006730	one-carbon metabolic process	1	16	0.0625	0.563083	0.674572	1	1	FOLC_CAEEL
biological_process	GO:0071248	cellular response to metal ion	1	4	0.25	0.975535	0.0533756	1	1	PDPK1_CAEEL
biological_process	GO:0034614	cellular response to reactive oxygen species	1	3	0.333333	0.333854	0.907686	1	1	PDPK1_CAEEL
biological_process	GO:0007611	learning or memory	1	4	0.25	0.826949	0.266393	1	1	PDPK1_CAEEL
biological_process	GO:0006569	tryptophan catabolic process	1	3	0.333333	0.540247	0.807786	1	1	KMO_CAEEL
biological_process	GO:0006096	glycolytic process	1	32	0.03125	0.0153602	0.998045	0.998	1	ODP2_CAEEL
biological_process	GO:0016310	phosphorylation	1	9	0.111111	0.956086	0.0557165	1	1	YNE7_CAEEL
biological_process	GO:0061771	response to caloric restriction	1	3	0.333333	0.867104	0.519429	1	1	PHA4_CAEEL
biological_process	GO:0043001	Golgi to plasma membrane protein transport	1	6	0.166667	0.990911	0.0486184	1	1	Q8I7G0_CAEEL
biological_process	GO:0007219	Notch signaling pathway	1	25	0.04	0.654665	0.488642	1	1	GLP1_CAEEL
biological_process	GO:0019827	stem cell population maintenance	1	2	0.5	0.87342	0.325059	1	1	ELT1_CAEEL
molecular_function	GO:0010181	FMN binding	1	21	0.047619	0.130015	0.973925	1	1	O16214_CAEEL
biological_process	GO:0006506	GPI anchor biosynthetic process	1	32	0.03125	0.0336514	0.990229	1	1	Q17515_CAEEL
biological_process	GO:2000192	negative regulation of fatty acid transport	1	3	0.333333	0.925361	0.422796	1	1	O44183_CAEEL
biological_process	GO:0060378	regulation of brood size	1	8	0.125	0.766141	0.436917	1	1	VPS53_CAEEL
molecular_function	GO:0015252	proton channel activity	1	13	0.0769231	0.113439	0.978086	1	1	A0A131MCH9_CAEEL
molecular_function	GO:0047555	3',5'-cyclic-GMP phosphodiesterase activity	1	3	0.333333	0.931984	0.405821	1	1	PDE1_CAEEL
molecular_function	GO:0048101	calcium- and calmodulin-regulated 3',5'-cyclic-GMP phosphodiesterase activity	1	1	1	1	0.159291	1	1	PDE1_CAEEL
biological_process	GO:0019933	cAMP-mediated signaling	1	7	0.142857	0.540247	0.807786	1	1	G5EE33_CAEEL
biological_process	GO:0019934	cGMP-mediated signaling	1	6	0.166667	0.980606	0.0699177	1	1	GCY35_CAEEL
biological_process	GO:1902160	negative regulation of cyclic nucleotide-gated ion channel activity	1	2	0.5	0.971998	0.306744	1	1	EGL4_CAEEL
biological_process	GO:2001137	positive regulation of endocytic recycling	1	5	0.2	0.667809	0.722671	1	1	GCK1_CAEEL
biological_process	GO:1903358	regulation of Golgi organization	1	5	0.2	0.80242	0.599892	1	1	GCK1_CAEEL
biological_process	GO:0040013	negative regulation of locomotion	1	17	0.0588235	0.354134	0.787435	1	1	VPP1_CAEEL
molecular_function	GO:0070182	DNA polymerase binding	1	7	0.142857	0.69054	0.703254	1	1	Q7Z151_CAEEL
biological_process	GO:0006272	leading strand elongation	1	5	0.2	0.80242	0.599892	1	1	O62218_CAEEL
biological_process	GO:0006298	mismatch repair	1	8	0.125	0.724561	0.571926	1	1	G5EFG5_CAEEL
molecular_function	GO:0016756	glutathione gamma-glutamylcysteinyltransferase activity	1	1	1	1	0.159291	1	1	PCS1_CAEEL
biological_process	GO:0098849	cellular detoxification of cadmium ion	1	2	0.5	0.971998	0.306744	1	1	PCS1_CAEEL
biological_process	GO:0071585	detoxification of cadmium ion	1	2	0.5	0.971998	0.306744	1	1	PCS1_CAEEL
biological_process	GO:0010273	detoxification of copper ion	1	2	0.5	0.971998	0.306744	1	1	PCS1_CAEEL
biological_process	GO:0050787	detoxification of mercury ion	1	1	1	1	0.167373	1	1	PCS1_CAEEL
biological_process	GO:0010312	detoxification of zinc ion	1	2	0.5	0.971998	0.306744	1	1	PCS1_CAEEL
biological_process	GO:0046938	phytochelatin biosynthetic process	1	1	1	1	0.167373	1	1	PCS1_CAEEL
biological_process	GO:0070374	positive regulation of ERK1 and ERK2 cascade	1	1	1	1	0.167373	1	1	PDE6_CAEEL
biological_process	GO:0031987	locomotion involved in locomotory behavior	1	12	0.0833333	0.354134	0.787435	1	1	Q95Q96_CAEEL
biological_process	GO:0050714	positive regulation of protein secretion	1	5	0.2	0.863894	0.397552	1	1	CO4A1_CAEEL
biological_process	GO:0006006	glucose metabolic process	1	13	0.0769231	0.0153602	0.998045	0.998	1	DCXR_CAEEL
molecular_function	GO:0003756	protein disulfide isomerase activity	1	15	0.0666667	0.284443	0.926037	1	1	Q9N4L6_CAEEL
biological_process	GO:0034976	response to endoplasmic reticulum stress	1	12	0.0833333	0.957534	0.0679504	1	1	LRK1_CAEEL
biological_process	GO:0097374	sensory neuron axon guidance	1	7	0.142857	0.625358	0.666146	1	1	PLX2_CAEEL
biological_process	GO:0007098	centrosome cycle	1	9	0.111111	0.828889	0.285988	1	1	SPD5_CAEEL
biological_process	GO:0032465	regulation of cytokinesis	1	14	0.0714286	0.708234	0.480518	1	1	PLK3_CAEEL
biological_process	GO:0050770	regulation of axonogenesis	1	4	0.25	1	8.39185e-08	1	0	UNC4_CAEEL
biological_process	GO:0043408	regulation of MAPK cascade	1	8	0.125	0.150115	0.924928	1	1	SULU_CAEEL
biological_process	GO:0060631	regulation of meiosis I	1	2	0.5	0.991179	0.0629199	1	1	SULU_CAEEL
cellular_component	GO:0001891	phagocytic cup	1	8	0.125	0.682286	0.706619	1	1	PIKI1_CAEEL
molecular_function	GO:0016303	1-phosphatidylinositol-3-kinase activity	1	5	0.2	0.817878	0.580083	1	1	PIKI1_CAEEL
biological_process	GO:0036092	phosphatidylinositol-3-phosphate biosynthetic process	1	3	0.333333	0.925361	0.422796	1	1	PIKI1_CAEEL
biological_process	GO:0051036	regulation of endosome size	1	7	0.142857	0.667809	0.722671	1	1	VPS18_CAEEL
biological_process	GO:0008654	phospholipid biosynthetic process	1	5	0.2	9.96048e-05	0.99997	0.057	1	G5ED01_CAEEL
biological_process	GO:0019432	triglyceride biosynthetic process	1	9	0.111111	0.196042	0.955677	1	1	Q9XXT5_CAEEL
biological_process	GO:0061564	axon development	1	3	0.333333	1	1.84435e-09	1	0	NGN1_CAEEL
biological_process	GO:0030490	maturation of SSU-rRNA	1	12	0.0833333	0.0790996	0.973509	1	1	NH2L1_CAEEL
molecular_function	GO:0004989	octopamine receptor activity	1	8	0.125	0.627809	0.750549	1	1	O44986_CAEEL
biological_process	GO:0007211	octopamine or tyramine signaling pathway	1	2	0.5	0.80242	0.599892	1	1	O44986_CAEEL
molecular_function	GO:0042054	histone methyltransferase activity	1	3	0.333333	0.97457	0.059174	1	1	MES2_CAEEL
cellular_component	GO:1990520	separase-securin complex	1	2	0.5	0.97982	0.263988	1	1	SEP1_CAEEL
biological_process	GO:0034090	maintenance of meiotic sister chromatid cohesion	1	3	0.333333	0.925361	0.422796	1	1	SEP1_CAEEL
biological_process	GO:0034088	maintenance of mitotic sister chromatid cohesion	1	5	0.2	0.80242	0.599892	1	1	SEP1_CAEEL
biological_process	GO:0030997	regulation of centriole-centriole cohesion	1	5	0.2	0.80242	0.599892	1	1	SEP1_CAEEL
biological_process	GO:0061062	regulation of nematode larval development	1	5	0.2	0.999043	0.00190431	1	0.831	SEP1_CAEEL
biological_process	GO:0015012	heparan sulfate proteoglycan biosynthetic process	1	9	0.111111	0.576564	0.706598	1	1	EXT2_CAEEL
biological_process	GO:0030728	ovulation	1	16	0.0625	0.644631	0.547876	1	1	HM18_CAEEL
cellular_component	GO:0017101	aminoacyl-tRNA synthetase multienzyme complex	1	7	0.142857	0.738643	0.658006	1	1	Q23315_CAEEL
cellular_component	GO:0005921	gap junction	1	48	0.0208333	0.00566766	0.999369	0.465	1	NLR1_CAEEL
molecular_function	GO:0005243	gap junction channel activity	1	32	0.03125	0.0235252	0.996765	0.99	1	NLR1_CAEEL
biological_process	GO:1902435	regulation of male mating behavior	1	5	0.2	0.257131	0.936031	1	1	Q21875_CAEEL
biological_process	GO:0072347	response to anesthetic	1	3	0.333333	0.925361	0.422796	1	1	UNC80_CAEEL
cellular_component	GO:0033180	proton-transporting V-type ATPase, V1 domain	1	5	0.2	0.907716	0.317714	1	1	VAS1_CAEEL
biological_process	GO:0006283	transcription-coupled nucleotide-excision repair	1	5	0.2	0.80242	0.599892	1	1	RPB9_CAEEL
cellular_component	GO:0046930	pore complex	1	4	0.25	0.900619	0.458309	1	1	VDAC_CAEEL
molecular_function	GO:0015288	porin activity	1	2	0.5	0.974637	0.293219	1	1	VDAC_CAEEL
molecular_function	GO:0008308	voltage-gated anion channel activity	1	3	0.333333	0.361029	0.851205	1	1	VDAC_CAEEL
cellular_component	GO:0016471	vacuolar proton-transporting V-type ATPase complex	1	7	0.142857	0.875698	0.372975	1	1	VPP1_CAEEL
cellular_component	GO:0000221	vacuolar proton-transporting V-type ATPase, V1 domain	1	3	0.333333	0.945189	0.368577	1	1	VATH2_CAEEL
molecular_function	GO:0015078	proton transmembrane transporter activity	1	21	0.047619	0.00249748	0.999373	0.335	1	VPP1_CAEEL
molecular_function	GO:0046961	proton-transporting ATPase activity, rotational mechanism	1	9	0.111111	0.567532	0.790309	1	1	VATH2_CAEEL
cellular_component	GO:0005774	vacuolar membrane	1	10	0.1	0.141754	0.917515	1	1	CTNS_CAEEL
cellular_component	GO:0033181	plasma membrane proton-transporting V-type ATPase complex	1	3	0.333333	0.945189	0.368577	1	1	VAS1_CAEEL
biological_process	GO:0009992	cellular water homeostasis	1	2	0.5	0.971998	0.306744	1	1	VAS1_CAEEL
biological_process	GO:0090314	positive regulation of protein targeting to membrane	1	6	0.166667	0.735089	0.666888	1	1	VAS1_CAEEL
biological_process	GO:0030641	regulation of cellular pH	1	2	0.5	0.00403401	0.999305	0.804	1	VAS1_CAEEL
cellular_component	GO:0060170	ciliary membrane	1	19	0.0526316	0.225328	0.945715	1	1	DYHC2_CAEEL
biological_process	GO:0007610	behavior	1	9	0.111111	0.878777	0.142548	1	1	GCY35_CAEEL
biological_process	GO:0030030	cell projection organization	1	5	0.2	1	2.85685e-08	1	0	OSM3_CAEEL
biological_process	GO:0051026	chiasma assembly	1	5	0.2	0.80242	0.599892	1	1	MSH5_CAEEL
biological_process	GO:0045143	homologous chromosome segregation	1	3	0.333333	0.589956	0.622242	1	1	MSH5_CAEEL
biological_process	GO:0000710	meiotic mismatch repair	1	4	0.25	0.867104	0.519429	1	1	MSH5_CAEEL
cellular_component	GO:0031143	pseudopodium	1	19	0.0526316	0.125542	0.974798	1	1	PIKI1_CAEEL
cellular_component	GO:0005758	mitochondrial intermembrane space	1	21	0.047619	0.141485	0.970617	1	1	KAD2_CAEEL
cellular_component	GO:0005747	mitochondrial respiratory chain complex I	1	42	0.0238095	0.0126658	0.998412	0.764	1	Q9N3H3_CAEEL
molecular_function	GO:0005381	iron ion transmembrane transporter activity	1	6	0.166667	0.754493	0.646998	1	1	MFRN_CAEEL
biological_process	GO:1905803	negative regulation of cellular response to manganese ion	1	7	0.142857	0.667809	0.722671	1	1	DCA11_CAEEL
biological_process	GO:1901216	positive regulation of neuron death	1	6	0.166667	0.481981	0.839983	1	1	DCA11_CAEEL
biological_process	GO:0010038	response to metal ion	1	9	0.111111	0.986499	0.0247608	1	1	PGP1_CAEEL
cellular_component	GO:0005967	mitochondrial pyruvate dehydrogenase complex	1	3	0.333333	0.945189	0.368577	1	1	ODP2_CAEEL
molecular_function	GO:0004742	dihydrolipoyllysine-residue acetyltransferase activity	1	2	0.5	0.974637	0.293219	1	1	ODP2_CAEEL
biological_process	GO:0006086	acetyl-CoA biosynthetic process from pyruvate	1	5	0.2	0.80242	0.599892	1	1	ODP2_CAEEL
cellular_component	GO:0034388	Pwp2p-containing subcomplex of 90S preribosome	1	4	0.25	0.900619	0.458309	1	1	UTP18_CAEEL
molecular_function	GO:0030620	U2 snRNA binding	1	4	0.25	0.878188	0.50049	1	1	PRP8_CAEEL
biological_process	GO:1905881	positive regulation of oogenesis	1	3	0.333333	0.925361	0.422796	1	1	SIMR1_CAEEL
molecular_function	GO:0033130	acetylcholine receptor binding	1	1	1	1	0.159291	1	1	RAPSN_CAEEL
molecular_function	GO:0043495	protein-membrane adaptor activity	1	5	0.2	0.817878	0.580083	1	1	RAPSN_CAEEL
cellular_component	GO:1990075	periciliary membrane compartment	1	11	0.0909091	0.522841	0.814798	1	1	AP2M_CAEEL
biological_process	GO:0035641	locomotory exploration behavior	1	3	0.333333	0.925361	0.422796	1	1	G5ED37_CAEEL
biological_process	GO:0007130	synaptonemal complex assembly	1	7	0.142857	0.540247	0.807786	1	1	G5EGS8_CAEEL
biological_process	GO:0030261	chromosome condensation	1	13	0.0769231	0.976319	0.0560891	1	1	CUL2_CAEEL
cellular_component	GO:0031985	Golgi cisterna	1	4	0.25	0.942887	0.118394	1	1	GOGA5_CAEEL
biological_process	GO:2000253	positive regulation of feeding behavior	1	3	0.333333	0.948126	0.159783	1	1	EAT17_CAEEL
biological_process	GO:1903539	protein localization to postsynaptic membrane	1	6	0.166667	0.863894	0.397552	1	1	PICAL_CAEEL
cellular_component	GO:0031461	cullin-RING ubiquitin ligase complex	1	12	0.0833333	0.905647	0.144878	1	1	CUL2_CAEEL
biological_process	GO:0030238	male sex determination	1	11	0.0909091	0.378701	0.889106	1	1	CUL2_CAEEL
biological_process	GO:1902230	negative regulation of intrinsic apoptotic signaling pathway in response to DNA damage	1	4	0.25	0.867104	0.519429	1	1	RPM1_CAEEL
biological_process	GO:0051759	sister chromosome movement towards spindle pole involved in meiotic sister chromatid segregation	1	4	0.25	0.867104	0.519429	1	1	CUL2_CAEEL
biological_process	GO:0097628	distal tip cell migration	1	3	0.333333	0.979881	0.0515211	1	1	RAC1_CAEEL
biological_process	GO:0050764	regulation of phagocytosis	1	2	0.5	0.9579	0.0984779	1	1	RAC1_CAEEL
cellular_component	GO:0043196	varicosity	1	5	0.2	0.849631	0.535294	1	1	G5EFE1_CAEEL
molecular_function	GO:0003785	actin monomer binding	1	7	0.142857	0.69054	0.703254	1	1	GELS1_CAEEL
biological_process	GO:0071689	muscle thin filament assembly	1	5	0.2	0.80242	0.599892	1	1	TMOD_CAEEL
biological_process	GO:0090090	negative regulation of canonical Wnt signaling pathway	1	18	0.0555556	0.170624	0.963106	1	1	APR1_CAEEL
molecular_function	GO:0019903	protein phosphatase binding	1	9	0.111111	0.299472	0.862765	1	1	RPM1_CAEEL
biological_process	GO:0032869	cellular response to insulin stimulus	1	4	0.25	0.994869	0.0157116	1	1	Q9XXT5_CAEEL
biological_process	GO:2000369	regulation of clathrin-dependent endocytosis	1	2	0.5	0.903322	0.275439	1	1	SEL5_CAEEL
biological_process	GO:0015870	acetylcholine transport	1	6	0.166667	0.896692	0.233859	1	1	DMD_CAEEL
biological_process	GO:0007032	endosome organization	1	20	0.05	0.111273	0.978725	1	1	VPS18_CAEEL
biological_process	GO:0015812	gamma-aminobutyric acid transport	1	2	0.5	0.971998	0.306744	1	1	G5EF43_CAEEL
biological_process	GO:0046856	phosphatidylinositol dephosphorylation	1	27	0.037037	0.045556	0.992928	1	1	MTMR5_CAEEL
biological_process	GO:0045933	positive regulation of muscle contraction	1	3	0.333333	0.804271	0.423436	1	1	GBR1_CAEEL
biological_process	GO:0016185	synaptic vesicle budding from presynaptic endocytic zone membrane	1	2	0.5	0.971998	0.306744	1	1	PICAL_CAEEL
cellular_component	GO:0000801	central element	1	4	0.25	0.900619	0.458309	1	1	G5EGS8_CAEEL
molecular_function	GO:0031435	mitogen-activated protein kinase kinase kinase binding	1	8	0.125	0.627809	0.750549	1	1	RPM1_CAEEL
molecular_function	GO:0030295	protein kinase activator activity	1	13	0.0769231	0.537228	0.649255	1	1	Q68TI8_CAEEL
cellular_component	GO:0005672	transcription factor TFIIA complex	1	3	0.333333	0.945189	0.368577	1	1	O44625_CAEEL
molecular_function	GO:0016251	RNA polymerase II general transcription initiation factor activity	1	13	0.0769231	0.362833	0.895313	1	1	TAF1_CAEEL
cellular_component	GO:0061673	mitotic spindle astral microtubule	1	2	0.5	0.97982	0.263988	1	1	ZYG9_CAEEL
cellular_component	GO:1990498	mitotic spindle microtubule	1	3	0.333333	0.945189	0.368577	1	1	ZYG9_CAEEL
biological_process	GO:0031113	regulation of microtubule polymerization	1	2	0.5	0.991938	0.0368749	1	1	EXC6_CAEEL
molecular_function	GO:0001222	transcription corepressor binding	1	3	0.333333	0.931984	0.405821	1	1	PER_CAEEL
biological_process	GO:0032922	circadian regulation of gene expression	1	1	1	1	0.167373	1	1	PER_CAEEL
biological_process	GO:0043153	entrainment of circadian clock by photoperiod	1	1	1	1	0.167373	1	1	PER_CAEEL
biological_process	GO:1902894	negative regulation of miRNA transcription	1	1	1	1	0.167373	1	1	PER_CAEEL
biological_process	GO:0007099	centriole replication	1	6	0.166667	0.667809	0.722671	1	1	ZYG1_CAEEL
cellular_component	GO:0099078	BORC complex	1	9	0.111111	0.627025	0.748325	1	1	BL1S2_CAEEL
biological_process	GO:0008333	endosome to lysosome transport	1	6	0.166667	0.82015	0.459753	1	1	VPS18_CAEEL
biological_process	GO:0090316	positive regulation of intracellular protein transport	1	3	0.333333	0.726513	0.516381	1	1	BL1S6_CAEEL
molecular_function	GO:0005332	gamma-aminobutyric acid:sodium symporter activity	1	2	0.5	0.974637	0.293219	1	1	G5EF43_CAEEL
biological_process	GO:0006836	neurotransmitter transport	1	8	0.125	0.999943	0.000136844	1	0.145	APC1_CAEEL
biological_process	GO:0070588	calcium ion transmembrane transport	1	24	0.0416667	0.90837	0.147513	1	1	CLHM1_CAEEL
biological_process	GO:0008593	regulation of Notch signaling pathway	1	8	0.125	0.925765	0.154059	1	1	LIN29_CAEEL
cellular_component	GO:1990357	terminal web	1	3	0.333333	0.945189	0.368577	1	1	TMOD_CAEEL
biological_process	GO:0030835	negative regulation of actin filament depolymerization	1	3	0.333333	0.999991	4.39233e-05	1	0.039	TMOD_CAEEL
biological_process	GO:0051694	pointed-end actin filament capping	1	3	0.333333	0.925361	0.422796	1	1	TMOD_CAEEL
biological_process	GO:0009996	negative regulation of cell fate specification	1	5	0.2	0.735089	0.666888	1	1	SSL1_CAEEL
cellular_component	GO:0031298	replication fork protection complex	1	4	0.25	0.900619	0.458309	1	1	Q19520_CAEEL
biological_process	GO:0000076	DNA replication checkpoint signaling	1	4	0.25	0.766172	0.470838	1	1	HPR9_CAEEL
biological_process	GO:0031573	mitotic intra-S DNA damage checkpoint signaling	1	13	0.0769231	0.333854	0.907686	1	1	HPR9_CAEEL
biological_process	GO:0035264	multicellular organism growth	1	18	0.0555556	0.958292	0.0657216	1	1	Q18965_CAEEL
molecular_function	GO:0004169	dolichyl-phosphate-mannose-protein mannosyltransferase activity	1	2	0.5	0.974637	0.293219	1	1	TMTC1_CAEEL
biological_process	GO:0035269	protein O-linked mannosylation	1	4	0.25	0.867104	0.519429	1	1	TMTC1_CAEEL
cellular_component	GO:0034518	RNA cap binding complex	1	7	0.142857	0.522841	0.814798	1	1	MXT_CAEEL
biological_process	GO:0051984	positive regulation of chromosome segregation	1	5	0.2	0.93708	0.264911	1	1	SPT16_CAEEL
molecular_function	GO:0019843	rRNA binding	1	22	0.0454545	0.011147	0.998645	0.877	1	Q9U2I4_CAEEL
cellular_component	GO:0035267	NuA4 histone acetyltransferase complex	1	17	0.0588235	0.252186	0.936712	1	1	O01905_CAEEL
cellular_component	GO:0000812	Swr1 complex	1	8	0.125	0.682286	0.706619	1	1	SSL1_CAEEL
biological_process	GO:0000492	box C/D snoRNP assembly	1	5	0.2	0.80242	0.599892	1	1	TOR_CAEEL
biological_process	GO:0016573	histone acetylation	1	18	0.0555556	0.272871	0.854453	1	1	O01905_CAEEL
biological_process	GO:0032543	mitochondrial translation	1	40	0.025	0.0118732	0.997011	0.992	1	RT24_CAEEL
cellular_component	GO:0005686	U2 snRNP	1	19	0.0526316	0.225328	0.945715	1	1	G5ECL3_CAEEL
biological_process	GO:0051729	germline cell cycle switching, mitotic to meiotic cell cycle	1	5	0.2	0.80242	0.599892	1	1	CCNE_CAEEL
molecular_function	GO:0051539	4 iron, 4 sulfur cluster binding	1	32	0.03125	0.0272619	0.99615	0.996	1	O62218_CAEEL
molecular_function	GO:1990269	RNA polymerase II C-terminal domain phosphoserine binding	1	2	0.5	0.974637	0.293219	1	1	RTF1_CAEEL
cellular_component	GO:0005840	ribosome	1	42	0.0238095	4.50939e-06	0.999999	0.001	1	RM44_CAEEL
biological_process	GO:2000737	negative regulation of stem cell differentiation	1	2	0.5	0.971998	0.306744	1	1	GLP1_CAEEL
biological_process	GO:2000648	positive regulation of stem cell proliferation	1	5	0.2	0.80242	0.599892	1	1	GLP1_CAEEL
molecular_function	GO:0015485	cholesterol binding	1	7	0.142857	0.69054	0.703254	1	1	MEC2_CAEEL
biological_process	GO:1905789	positive regulation of detection of mechanical stimulus involved in sensory perception of touch	1	11	0.0909091	0.428074	0.866788	1	1	MEC2_CAEEL
biological_process	GO:1905792	positive regulation of mechanosensory behavior	1	10	0.1	0.481981	0.839983	1	1	MEC2_CAEEL
biological_process	GO:1905309	positive regulation of cohesin loading	1	2	0.5	0.971998	0.306744	1	1	SCC3_CAEEL
biological_process	GO:2000001	regulation of DNA damage checkpoint	1	2	0.5	0.96413	0.19758	1	1	SCC3_CAEEL
biological_process	GO:0007549	dosage compensation	1	2	0.5	0.948126	0.159783	1	1	SEA2_CAEEL
cellular_component	GO:0000243	commitment complex	1	7	0.142857	0.738643	0.658006	1	1	Q22961_CAEEL
cellular_component	GO:0071011	precatalytic spliceosome	1	22	0.0454545	0.141485	0.970617	1	1	NH2L1_CAEEL
cellular_component	GO:0005682	U5 snRNP	1	12	0.0833333	0.474856	0.841131	1	1	PRP8_CAEEL
biological_process	GO:0000387	spliceosomal snRNP assembly	1	21	0.047619	0.185948	0.938356	1	1	YLU5_CAEEL
biological_process	GO:0001306	age-dependent response to oxidative stress	1	3	0.333333	0.925361	0.422796	1	1	DAF11_CAEEL
biological_process	GO:0030511	positive regulation of transforming growth factor beta receptor signaling pathway	1	12	0.0833333	0.378701	0.889106	1	1	DAF11_CAEEL
biological_process	GO:0006865	amino acid transport	1	11	0.0909091	0.00791745	0.998102	0.963	1	Q8I4M0_CAEEL
cellular_component	GO:0035101	FACT complex	1	3	0.333333	0.945189	0.368577	1	1	SPT16_CAEEL
molecular_function	GO:0031491	nucleosome binding	1	9	0.111111	0.193936	0.956082	1	1	SPT16_CAEEL
biological_process	GO:0034724	DNA replication-independent chromatin organization	1	1	1	0.863894	0.397552	1	1	SPT16_CAEEL
biological_process	GO:0045787	positive regulation of cell cycle	1	4	0.25	0.989615	0.0204461	1	1	SPT16_CAEEL
biological_process	GO:0045995	regulation of embryonic development	1	5	0.2	0.897754	0.197822	1	1	SPT16_CAEEL
cellular_component	GO:0005773	vacuole	1	17	0.0588235	0.0131771	0.992569	0.769	1	IPYR_CAEEL
biological_process	GO:0051659	maintenance of mitochondrion location	1	1	1	1	0.167373	1	1	SRBS1_CAEEL
cellular_component	GO:0000123	histone acetyltransferase complex	1	7	0.142857	0.155486	0.931756	1	1	TRR1_CAEEL
cellular_component	GO:0016604	nuclear body	1	13	0.0769231	0.110721	0.954537	1	1	HSF1_CAEEL
biological_process	GO:0000055	ribosomal large subunit export from nucleus	1	5	0.2	0.80242	0.599892	1	1	Q23089_CAEEL
cellular_component	GO:0005665	RNA polymerase II, core complex	1	13	0.0769231	0.429946	0.86372	1	1	RPB9_CAEEL
cellular_component	GO:0005666	RNA polymerase III complex	1	19	0.0526316	0.225328	0.945715	1	1	Q18566_CAEEL
molecular_function	GO:0004525	ribonuclease III activity	1	3	0.333333	0.931984	0.405821	1	1	RM44_CAEEL
biological_process	GO:0016075	rRNA catabolic process	1	12	0.0833333	0.196042	0.955677	1	1	RM44_CAEEL
biological_process	GO:1904937	sensory neuron migration	1	7	0.142857	0.667809	0.722671	1	1	CAM1_CAEEL
cellular_component	GO:0031080	nuclear pore outer ring	1	7	0.142857	0.738643	0.658006	1	1	NPP5_CAEEL
biological_process	GO:1990893	mitotic chromosome centromere condensation	1	3	0.333333	0.925361	0.422796	1	1	NUP98_CAEEL
biological_process	GO:0032008	positive regulation of TOR signaling	1	9	0.111111	0.293402	0.923154	1	1	O61201_CAEEL
cellular_component	GO:0000792	heterochromatin	1	7	0.142857	0.68039	0.611795	1	1	SET25_CAEEL
cellular_component	GO:0005652	nuclear lamina	1	2	0.5	0.945189	0.368577	1	1	SET25_CAEEL
biological_process	GO:0019236	response to pheromone	1	6	0.166667	0.540247	0.807786	1	1	DAF11_CAEEL
molecular_function	GO:0003950	NAD+ ADP-ribosyltransferase activity	1	7	0.142857	0.69054	0.703254	1	1	TNKS1_CAEEL
molecular_function	GO:1990404	protein ADP-ribosylase activity	1	4	0.25	0.878188	0.50049	1	1	TNKS1_CAEEL
biological_process	GO:0043069	negative regulation of programmed cell death	1	3	0.333333	0.286047	0.837007	1	1	TNKS1_CAEEL
biological_process	GO:0070212	protein poly-ADP-ribosylation	1	4	0.25	0.867104	0.519429	1	1	TNKS1_CAEEL
molecular_function	GO:0005521	lamin binding	1	4	0.25	0.878188	0.50049	1	1	TM201_CAEEL
cellular_component	GO:0005861	troponin complex	1	15	0.0666667	0.34964	0.899723	1	1	H2KYL9_CAEEL
biological_process	GO:0048626	myoblast fate specification	1	1	1	1	0.167373	1	1	SEM2_CAEEL
biological_process	GO:0048582	positive regulation of post-embryonic development	1	1	1	0.739138	0.445564	1	1	SEM2_CAEEL
molecular_function	GO:0004523	RNA-DNA hybrid ribonuclease activity	1	11	0.0909091	0.45726	0.851833	1	1	Q09633_CAEEL
biological_process	GO:0043137	DNA replication, removal of RNA primer	1	11	0.0909091	0.428074	0.866788	1	1	Q09633_CAEEL
cellular_component	GO:0030915	Smc5-Smc6 complex	1	7	0.142857	0.738643	0.658006	1	1	SMC6_CAEEL
biological_process	GO:0007292	female gamete generation	1	2	0.5	0.999764	0.000448435	1	0.336	SOS_CAEEL
molecular_function	GO:0018024	histone-lysine N-methyltransferase activity	1	10	0.1	0.981612	0.0475765	1	1	MET2_CAEEL
cellular_component	GO:0008328	ionotropic glutamate receptor complex	1	3	0.333333	0.849631	0.535294	1	1	SOL1_CAEEL
molecular_function	GO:0016247	channel regulator activity	1	3	0.333333	0.220808	0.947747	1	1	SOL1_CAEEL
biological_process	GO:0051968	positive regulation of synaptic transmission, glutamatergic	1	4	0.25	0.867104	0.519429	1	1	SOL1_CAEEL
biological_process	GO:0061024	membrane organization	1	10	0.1	0.997003	0.004734	1	0.996	Q7K7J0_CAEEL
cellular_component	GO:0043596	nuclear replication fork	1	2	0.5	0.225328	0.945715	1	1	Q19520_CAEEL
biological_process	GO:0090268	activation of mitotic cell cycle spindle assembly checkpoint	1	3	0.333333	0.925361	0.422796	1	1	ZYG1_CAEEL
biological_process	GO:0006473	protein acetylation	1	5	0.2	0.277097	0.836389	1	1	ATAT1_CAEEL
cellular_component	GO:0043227	membrane-bounded organelle	1	6	0.166667	0.999998	1.92843e-06	1	0	ZDHCS_CAEEL
biological_process	GO:0007338	single fertilization	1	11	0.0909091	0.98862	0.029094	1	1	PAR3_CAEEL
molecular_function	GO:0046974	histone methyltransferase activity (H3-K9 specific)	1	2	0.5	0.974637	0.293219	1	1	MET2_CAEEL
biological_process	GO:0070828	heterochromatin organization	1	1	1	0.173353	0.931597	1	1	MET2_CAEEL
biological_process	GO:0045835	negative regulation of meiotic nuclear division	1	1	1	0.80242	0.599892	1	1	MET2_CAEEL
biological_process	GO:0090309	positive regulation of DNA methylation-dependent heterochromatin assembly	1	1	1	1	0.167373	1	1	MET2_CAEEL
biological_process	GO:0072325	vulval cell fate commitment	1	1	1	0.975131	0.0966785	1	1	MET2_CAEEL
biological_process	GO:2000637	positive regulation of gene silencing by miRNA	1	1	1	0.735089	0.666888	1	1	TBC11_CAEEL
biological_process	GO:0045842	positive regulation of mitotic metaphase/anaphase transition	1	8	0.125	0.602448	0.769116	1	1	CDC27_CAEEL
biological_process	GO:0070979	protein K11-linked ubiquitination	1	7	0.142857	0.667809	0.722671	1	1	APC1_CAEEL
molecular_function	GO:0051721	protein phosphatase 2A binding	1	6	0.166667	0.754493	0.646998	1	1	RENT1_CAEEL
biological_process	GO:0034660	ncRNA metabolic process	1	2	0.5	3.50101e-05	0.999982	0.014	1	RENT1_CAEEL
cellular_component	GO:0005663	DNA replication factor C complex	1	5	0.2	0.849631	0.535294	1	1	Q18547_CAEEL
molecular_function	GO:0008080	N-acetyltransferase activity	1	31	0.0322581	0.169239	0.905287	1	1	GNA1_CAEEL
biological_process	GO:0010826	negative regulation of centrosome duplication	1	6	0.166667	0.667809	0.722671	1	1	ATX2_CAEEL
biological_process	GO:0031647	regulation of protein stability	1	19	0.0526316	0.295444	0.839295	1	1	RPM1_CAEEL
cellular_component	GO:0043292	contractile fiber	1	5	0.2	1	1.5737e-12	1	0	ROCK_CAEEL
biological_process	GO:0038083	peptidyl-tyrosine autophosphorylation	1	3	0.333333	0.925361	0.422796	1	1	Q9XX42_CAEEL
molecular_function	GO:0004568	chitinase activity	1	8	0.125	0.627809	0.750549	1	1	CHIT_CAEEL
biological_process	GO:0006032	chitin catabolic process	1	8	0.125	0.602448	0.769116	1	1	CHIT_CAEEL
biological_process	GO:0000272	polysaccharide catabolic process	1	2	0.5	0.674941	0.621299	1	1	CHIT_CAEEL
cellular_component	GO:0097543	ciliary inversin compartment	1	3	0.333333	0.945189	0.368577	1	1	CNG_CAEEL
biological_process	GO:0003031	detection of carbon dioxide	1	2	0.5	0.971998	0.306744	1	1	CNG_CAEEL
biological_process	GO:0007199	G protein-coupled receptor signaling pathway coupled to cGMP nucleotide second messenger	1	2	0.5	0.971998	0.306744	1	1	CNG_CAEEL
cellular_component	GO:0016014	dystrobrevin complex	1	2	0.5	0.97982	0.263988	1	1	DMD_CAEEL
biological_process	GO:0043056	forward locomotion	1	5	0.2	0.428074	0.866788	1	1	DMD_CAEEL
biological_process	GO:0099536	synaptic signaling	1	4	0.25	0.999072	0.00138411	1	0.777	DMD_CAEEL
biological_process	GO:0007586	digestion	1	3	0.333333	0.972161	0.0909571	1	1	ELT2_CAEEL
biological_process	GO:0043086	negative regulation of catalytic activity	1	1	1	0.893816	0.181787	1	1	ELT2_CAEEL
biological_process	GO:1902097	positive regulation of transcription from RNA polymerase II promoter involved in defense response to Gram-negative bacterium	1	5	0.2	0.80242	0.599892	1	1	ELT2_CAEEL
biological_process	GO:0030856	regulation of epithelial cell differentiation	1	1	1	0.996609	0.0358703	1	1	ELT2_CAEEL
molecular_function	GO:0016717	oxidoreductase activity, acting on paired donors, with oxidation of a pair of donors resulting in the reduction of molecular oxygen to two molecules of water	1	4	0.25	0.567532	0.790309	1	1	FAT1_CAEEL
biological_process	GO:0014055	acetylcholine secretion, neurotransmission	1	2	0.5	0.930082	0.195729	1	1	CBPE_CAEEL
biological_process	GO:0045088	regulation of innate immune response	1	3	0.333333	0.540247	0.807786	1	1	DVE1_CAEEL
biological_process	GO:0006636	unsaturated fatty acid biosynthetic process	1	8	0.125	0.540247	0.807786	1	1	FAT1_CAEEL
cellular_component	GO:0000417	HIR complex	1	1	1	1	0.142084	1	1	HIRA_CAEEL
biological_process	GO:0006336	DNA replication-independent chromatin assembly	1	5	0.2	0.667809	0.722671	1	1	HIRA_CAEEL
biological_process	GO:0001555	oocyte growth	1	9	0.111111	0.540247	0.807786	1	1	GLP1_CAEEL
cellular_component	GO:0005834	heterotrimeric G-protein complex	1	31	0.0322581	0.0528739	0.991396	0.998	1	GPA16_CAEEL
molecular_function	GO:0001664	G protein-coupled receptor binding	1	29	0.0344828	0.119836	0.945868	1	1	GPA16_CAEEL
molecular_function	GO:0031683	G-protein beta/gamma-subunit complex binding	1	30	0.0333333	0.0365281	0.994548	0.999	1	GPA16_CAEEL
biological_process	GO:0007043	cell-cell junction assembly	1	3	0.333333	0.87342	0.325059	1	1	JAC1_CAEEL
biological_process	GO:0098887	neurotransmitter receptor transport, endosome to postsynaptic membrane	1	2	0.5	0.971998	0.306744	1	1	Q20298_CAEEL
biological_process	GO:0043113	receptor clustering	1	6	0.166667	0.674941	0.621299	1	1	DLG1_CAEEL
cellular_component	GO:0090571	RNA polymerase II transcription repressor complex	1	2	0.5	0.429946	0.86372	1	1	G5EDL0_CAEEL
biological_process	GO:1903354	regulation of distal tip cell migration	1	8	0.125	0.987937	0.0339108	1	1	PAT2_CAEEL
biological_process	GO:0035017	cuticle pattern formation	1	2	0.5	0.971998	0.306744	1	1	LIN29_CAEEL
molecular_function	GO:0015248	sterol transporter activity	1	13	0.0769231	0.362833	0.895313	1	1	LRP_CAEEL
biological_process	GO:0015918	sterol transport	1	2	0.5	0.951382	0.17985	1	1	LRP_CAEEL
cellular_component	GO:0030670	phagocytic vesicle membrane	1	13	0.0769231	0.429946	0.86372	1	1	PIKI1_CAEEL
biological_process	GO:0006995	cellular response to nitrogen starvation	1	7	0.142857	0.667809	0.722671	1	1	LGG2_CAEEL
biological_process	GO:0097237	cellular response to toxic substance	1	6	0.166667	0.529162	0.742869	1	1	LGG2_CAEEL
biological_process	GO:0001778	plasma membrane repair	1	4	0.25	0.80242	0.599892	1	1	LGG2_CAEEL
biological_process	GO:0098792	xenophagy	1	4	0.25	0.80242	0.599892	1	1	LGG2_CAEEL
biological_process	GO:1901098	positive regulation of autophagosome maturation	1	2	0.5	0.971998	0.306744	1	1	LGG2_CAEEL
biological_process	GO:1905608	positive regulation of presynapse assembly	1	3	0.333333	0.925361	0.422796	1	1	RPM1_CAEEL
biological_process	GO:0050803	regulation of synapse structure or activity	1	7	0.142857	0.99297	0.0153132	1	1	UNC4_CAEEL
biological_process	GO:0006108	malate metabolic process	1	4	0.25	0.867104	0.519429	1	1	FUMH_CAEEL
biological_process	GO:1905868	regulation of 3'-UTR-mediated mRNA stabilization	1	4	0.25	0.867104	0.519429	1	1	RPM1_CAEEL
biological_process	GO:1905606	regulation of presynapse assembly	1	4	0.25	0.90329	0.332191	1	1	RPM1_CAEEL
biological_process	GO:0015986	ATP synthesis coupled proton transport	1	14	0.0714286	0.111273	0.978725	1	1	VPP1_CAEEL
cellular_component	GO:1990298	bub1-bub3 complex	1	2	0.5	0.97982	0.263988	1	1	BUB1_CAEEL
molecular_function	GO:0043515	kinetochore binding	1	2	0.5	0.974637	0.293219	1	1	BUB1_CAEEL
biological_process	GO:1990299	Bub1-Bub3 complex localization to kinetochore	1	2	0.5	0.971998	0.306744	1	1	BUB1_CAEEL
biological_process	GO:0051754	meiotic sister chromatid cohesion, centromeric	1	2	0.5	0.971998	0.306744	1	1	BUB1_CAEEL
biological_process	GO:0000280	nuclear division	1	2	0.5	1	6.00139e-07	1	0.001	BUB1_CAEEL
biological_process	GO:1903394	protein localization to kinetochore involved in kinetochore assembly	1	5	0.2	0.80242	0.599892	1	1	BUB1_CAEEL
biological_process	GO:0016051	carbohydrate biosynthetic process	1	4	0.25	0.0354273	0.983335	1	1	FUTA_CAEEL
biological_process	GO:0009636	response to toxic substance	1	11	0.0909091	0.344271	0.805099	1	1	BRE2_CAEEL
biological_process	GO:0043476	pigment accumulation	1	2	0.5	0.971998	0.306744	1	1	DAF14_CAEEL
biological_process	GO:0035176	social behavior	1	2	0.5	0.80242	0.599892	1	1	DAF14_CAEEL
biological_process	GO:1905804	positive regulation of cellular response to manganese ion	1	2	0.5	0.971998	0.306744	1	1	SKN1_CAEEL
cellular_component	GO:0000786	nucleosome	1	39	0.025641	0.0188252	0.997482	0.889	1	MES2_CAEEL
biological_process	GO:0003391	amphid sensory organ dendrite retrograde extension	1	3	0.333333	0.925361	0.422796	1	1	DEX1_CAEEL
biological_process	GO:0050775	positive regulation of dendrite morphogenesis	1	5	0.2	0.93708	0.264911	1	1	Q53U87_CAEEL
biological_process	GO:0034587	piRNA metabolic process	1	7	0.142857	0.428074	0.866788	1	1	TG250_CAEEL
biological_process	GO:0090065	regulation of production of siRNA involved in RNA interference	1	2	0.5	0.971998	0.306744	1	1	ERGO1_CAEEL
biological_process	GO:0070936	protein K48-linked ubiquitination	1	2	0.5	0.971998	0.306744	1	1	UBE4_CAEEL
molecular_function	GO:0031072	heat shock protein binding	1	19	0.0526316	0.675009	0.485621	1	1	O61980_CAEEL
biological_process	GO:0007254	JNK cascade	1	11	0.0909091	0.447389	0.765692	1	1	G5EBV3_CAEEL
biological_process	GO:1990169	stress response to copper ion	1	6	0.166667	0.903322	0.275439	1	1	Q17645_CAEEL
cellular_component	GO:0005890	sodium:potassium-exchanging ATPase complex	1	4	0.25	0.900619	0.458309	1	1	Q9XUG9_CAEEL
molecular_function	GO:0061750	acid sphingomyelin phosphodiesterase activity	1	3	0.333333	0.931984	0.405821	1	1	ASM1_CAEEL
molecular_function	GO:0004767	sphingomyelin phosphodiesterase activity	1	5	0.2	0.817878	0.580083	1	1	ASM1_CAEEL
biological_process	GO:0046513	ceramide biosynthetic process	1	21	0.047619	0.045556	0.992928	1	1	ASM1_CAEEL
biological_process	GO:0006685	sphingomyelin catabolic process	1	5	0.2	0.80242	0.599892	1	1	ASM1_CAEEL
molecular_function	GO:0016831	carboxy-lyase activity	1	7	0.142857	0.0487837	0.992279	1	1	TDC1_CAEEL
molecular_function	GO:0033971	hydroxyisourate hydrolase activity	1	2	0.5	0.974637	0.293219	1	1	HIUH2_CAEEL
biological_process	GO:0006144	purine nucleobase metabolic process	1	3	0.333333	0.481981	0.839983	1	1	HIUH2_CAEEL
molecular_function	GO:0070097	delta-catenin binding	1	1	1	1	0.159291	1	1	HMR1_CAEEL
biological_process	GO:0035545	determination of left/right asymmetry in nervous system	1	14	0.0714286	0.293402	0.923154	1	1	RIG6_CAEEL
biological_process	GO:0097402	neuroblast migration	1	15	0.0666667	0.224776	0.946752	1	1	CAM1_CAEEL
biological_process	GO:0060828	regulation of canonical Wnt signaling pathway	1	12	0.0833333	0.0623543	0.979991	1	1	Q22757_CAEEL
cellular_component	GO:0005952	cAMP-dependent protein kinase complex	1	3	0.333333	0.945189	0.368577	1	1	KAPC2_CAEEL
molecular_function	GO:0004679	AMP-activated protein kinase activity	1	3	0.333333	0.931984	0.405821	1	1	KAPC2_CAEEL
molecular_function	GO:0004691	cAMP-dependent protein kinase activity	1	2	0.5	0.974637	0.293219	1	1	KAPC2_CAEEL
cellular_component	GO:0005892	acetylcholine-gated channel complex	1	10	0.1	0.573687	0.784104	1	1	Q19280_CAEEL
cellular_component	GO:0005771	multivesicular body	1	11	0.0909091	0.522841	0.814798	1	1	Q9TXI3_CAEEL
biological_process	GO:0008610	lipid biosynthetic process	1	5	0.2	0.000218577	0.999895	0.102	1	K8ERZ6_CAEEL
molecular_function	GO:0015267	channel activity	1	11	0.0909091	0.927594	0.0877754	1	1	Q9XW36_CAEEL
biological_process	GO:1904778	positive regulation of protein localization to cell cortex	1	7	0.142857	0.667809	0.722671	1	1	CBD1_CAEEL
biological_process	GO:1903078	positive regulation of protein localization to plasma membrane	1	8	0.125	0.481981	0.839983	1	1	CBD1_CAEEL
molecular_function	GO:0017005	3'-tyrosyl-DNA phosphodiesterase activity	1	2	0.5	0.974637	0.293219	1	1	TYDP1_CAEEL
molecular_function	GO:0009378	four-way junction helicase activity	1	4	0.25	0.878188	0.50049	1	1	WRN_CAEEL
biological_process	GO:0051276	chromosome organization	1	3	0.333333	0.97507	0.0327489	1	1	SMC6_CAEEL
biological_process	GO:0000712	resolution of meiotic recombination intermediates	1	22	0.0454545	0.0961905	0.982292	1	1	G5EBZ1_CAEEL
biological_process	GO:0010165	response to X-ray	1	10	0.1	0.576564	0.706598	1	1	SMC1_CAEEL
[truncated: 4,817 more rows]
[truncated: 579 more columns]

## Sheet: polyQ
GO domain	GO ID	GO term	polyQ protein	total number	number / total	raw p-value under-representation	raw p-value over-representation	FWER under-representation	FWER over-representation	Gene Name
cellular_component	GO:0005634	nucleus	291	2719	0.107025	1	1.36441e-42	1	0	PER_CAEEL	SEA2_CAEEL	TLP1_CAEEL	SEM2_CAEEL	RENT1_CAEEL	TAF4_CAEEL	HIF1_CAEEL	LE607_CAEEL	BED3_CAEEL	EGL13_CAEEL	IFET1_CAEEL	LAG3_CAEEL	FOZI1_CAEEL	HIPK_CAEEL	HSF1_CAEEL	ISY1_CAEEL	MBK1_CAEEL	NCOR1_CAEEL	CBP1_CAEEL	C2D1_CAEEL	DDX3_CAEEL	HM20_CAEEL	HM22_CAEEL	HM36_CAEEL	CRTC1_CAEEL	BLMP1_CAEEL	DCP66_CAEEL	LIN36_CAEEL	LIN13_CAEEL	MCM5_CAEEL	IMA3_CAEEL	DRE1_CAEEL	MAB3_CAEEL	LIN29_CAEEL	LIN59_CAEEL	CNT2_CAEEL	MBL_CAEEL	MBK2_CAEEL	LIM4_CAEEL	ODR7_CAEEL
cellular_component	GO:0005737	cytoplasm	250	2449	0.102082	1	8.19019e-13	1	0	PK1_CAEEL	VATE_CAEEL	PER_CAEEL	RSA2_CAEEL	SEA2_CAEEL	SRBS1_CAEEL	RENT1_CAEEL	SAS6_CAEEL	TAF4_CAEEL	LIPA_CAEEL	IFET1_CAEEL	IFA3_CAEEL	HIPK_CAEEL	HSF1_CAEEL	LIN41_CAEEL	CBP1_CAEEL	DDX3_CAEEL	JIP_CAEEL	CRTC1_CAEEL	BLMP1_CAEEL	NUMB1_CAEEL	IMA3_CAEEL	DRE1_CAEEL	CSN1_CAEEL	LIN10_CAEEL	ANKHM_CAEEL	MBL_CAEEL	MBK2_CAEEL	PAR3_CAEEL	SID3_CAEEL	PAC1_CAEEL	SAM10_CAEEL	SZY20_CAEEL	ROA1_CAEEL	SIAH1_CAEEL	PQN41_CAEEL	NPHP1_CAEEL	PAR1_CAEEL	WRM1_CAEEL	YAP1_CAEEL
cellular_component	GO:0016021	integral component of membrane	156	6449	0.0241898	2.77593e-65	1	0	1	PK1_CAEEL	FRIZ2_CAEEL	MUA3_CAEEL	GOGA5_CAEEL	DNJ1_CAEEL	INX10_CAEEL	PKD1_CAEEL	PAR3_CAEEL	SLO1_CAEEL	SYB1_CAEEL	TEN1_CAEEL	AKAP1_CAEEL	BNIP3_CAEEL	MYRF1_CAEEL	MACO1_CAEEL	CPNA1_CAEEL	GCY23_CAEEL	BLI4_CAEEL	DEX1_CAEEL	CED1_CAEEL	G5EDE8_CAEEL	H7BRC9_CAEEL	Q9UB29_CAEEL	G5EDN5_CAEEL	H7BRM5_CAEEL	Q9UB28_CAEEL	H7BRM4_CAEEL	G5EE44_CAEEL	Q9BMU4_CAEEL	G5EE96_CAEEL	G5EDF9_CAEEL	H7BRM7_CAEEL	Q18728_CAEEL	Q09934_CAEEL	A0A3B1E4Z6_CAEEL	O44469_CAEEL	A0A0K3ARE8_CAEEL	Q1XFY2_CAEEL	G4RT15_CAEEL	H1ZUX0_CAEEL
molecular_function	GO:0046872	metal ion binding	128	1196	0.107023	1	2.52541e-11	1	0	RNP1_CAEEL	SEA2_CAEEL	TLP1_CAEEL	RIM_CAEEL	BED3_CAEEL	NU301_CAEEL	KRAF1_CAEEL	DPY20_CAEEL	FLH1_CAEEL	BLMP1_CAEEL	LIN36_CAEEL	LIN13_CAEEL	MAB3_CAEEL	LIN29_CAEEL	LIN59_CAEEL	CNT2_CAEEL	MBL_CAEEL	MTMR6_CAEEL	LIM4_CAEEL	MEP1_CAEEL	RING2_CAEEL	SAEG1_CAEEL	SET26_CAEEL	SYD9_CAEEL	SET9_CAEEL	XRN2_CAEEL	SOMI1_CAEEL	PAR1_CAEEL	RN113_CAEEL	TYR1_CAEEL	TTN1_CAEEL	MRCK_CAEEL	ZNF2_CAEEL	ZFP1_CAEEL	TRA1_CAEEL	NLK_CAEEL	PP2C2_CAEEL	PHOCN_CAEEL	SULU_CAEEL	YL57_CAEEL
molecular_function	GO:0003723	RNA binding	107	420	0.254762	1	1.56376e-34	1	0	RNP1_CAEEL	RENT1_CAEEL	LARP1_CAEEL	LIN41_CAEEL	DDX3_CAEEL	ANKHM_CAEEL	MBL_CAEEL	MEP1_CAEEL	PGL1_CAEEL	PHM2_CAEEL	SOR1_CAEEL	SZY20_CAEEL	ROA1_CAEEL	DHX15_CAEEL	XRN2_CAEEL	YO61_CAEEL	ZNFX1_CAEEL	PUF60_CAEEL	NUP98_CAEEL	AKAP1_CAEEL	DCP2_CAEEL	GLD3_CAEEL	ATX2_CAEEL	G5EE68_CAEEL	G5EF03_CAEEL	A7KQE9_CAEEL	G5ECB9_CAEEL	A0A0K3AX15_CAEEL	W6RTE4_CAEEL	D5MCQ6_CAEEL	A0A2K5ATU5_CAEEL	D5MCQ1_CAEEL	Q9U203_CAEEL	Q8MXR2_CAEEL	Q18265_CAEEL	A0A7R9XLP7_CAEEL	H2KZU0_CAEEL	Q9GYQ9_CAEEL	W6RRU8_CAEEL	O44760_CAEEL
biological_process	GO:0006357	regulation of transcription by RNA polymerase II	100	677	0.14771	1	6.51628e-21	1	0	HIF1_CAEEL	LE607_CAEEL	BED3_CAEEL	EGL13_CAEEL	HSF1_CAEEL	NCOR1_CAEEL	NU301_CAEEL	C2D1_CAEEL	HM20_CAEEL	HM22_CAEEL	HM36_CAEEL	BLMP1_CAEEL	MED13_CAEEL	MAB3_CAEEL	LIN29_CAEEL	LIM4_CAEEL	ODR7_CAEEL	SKN1_CAEEL	PHM2_CAEEL	SAEG1_CAEEL	TBX34_CAEEL	SPTF3_CAEEL	UNC30_CAEEL	EGL27_CAEEL	MED29_CAEEL	TBX33_CAEEL	TBX38_CAEEL	TLK1_CAEEL	POP1_CAEEL	WBS14_CAEEL	ZNF2_CAEEL	TRA1_CAEEL	ZIP3_CAEEL	MED12_CAEEL	AST1_CAEEL	HLH6_CAEEL	NFYB1_CAEEL	MED23_CAEEL	NHR43_CAEEL	NHR1_CAEEL
cellular_component	GO:0005886	plasma membrane	89	1355	0.0656827	0.995035	0.00637078	1	0.835	PK1_CAEEL	VATE_CAEEL	SRBS1_CAEEL	DMD_CAEEL	LIPA_CAEEL	FRIZ2_CAEEL	MUA3_CAEEL	DDX3_CAEEL	EFA6_CAEEL	GLR1_CAEEL	INX10_CAEEL	LIN10_CAEEL	MTMR6_CAEEL	SYG1_CAEEL	UN112_CAEEL	UNC13_CAEEL	SYB1_CAEEL	TEN1_CAEEL	CLA1_CAEEL	GCY23_CAEEL	CED1_CAEEL	G5EGK1_CAEEL	I1W6S5_CAEEL	G5EGI5_CAEEL	G5ED33_CAEEL	G5EFE0_CAEEL	Q09934_CAEEL	Q7JKP1_CAEEL	A0A061AKT4_CAEEL	U4PS34_CAEEL	H1ZUX0_CAEEL	Q7YTG1_CAEEL	Q21342_CAEEL	A0A061ACP8_CAEEL	S6EZU2_CAEEL	Q8I103_CAEEL	O45799_CAEEL	E9P878_CAEEL	G4S034_CAEEL	A0A0K3AQU9_CAEEL
molecular_function	GO:0005524	ATP binding	81	1353	0.059867	0.0990323	0.919996	1	1	PK1_CAEEL	RENT1_CAEEL	HIPK_CAEEL	MBK1_CAEEL	KRAF1_CAEEL	DDX3_CAEEL	MCM5_CAEEL	MBK2_CAEEL	SID3_CAEEL	PAN3_CAEEL	SSL1_CAEEL	OSM3_CAEEL	UNC89_CAEEL	DHX15_CAEEL	PAR1_CAEEL	ZNFX1_CAEEL	TTN1_CAEEL	TLK1_CAEEL	MRCK_CAEEL	TOR_CAEEL	NLK_CAEEL	SULU_CAEEL	UNC51_CAEEL	MYO2_CAEEL	INSR_CAEEL	KIN20_CAEEL	GCY23_CAEEL	GLD2_CAEEL	CDK8_CAEEL	G5EF53_CAEEL	G5EDF9_CAEEL	V6CJK3_CAEEL	A0A3B1E4Z6_CAEEL	A0A0K3ARE8_CAEEL	V6CKR7_CAEEL	P91094_CAEEL	A0A5E4LXR0_CAEEL	A0A061AKR6_CAEEL	Q19554_CAEEL	Q2XN10_CAEEL
molecular_function	GO:0008270	zinc ion binding	70	713	0.0981767	0.999145	0.00135412	1	0.479	RENT1_CAEEL	DMD_CAEEL	LIN41_CAEEL	CBP1_CAEEL	DRE1_CAEEL	ODR7_CAEEL	SIAH1_CAEEL	RPM1_CAEEL	TOP3_CAEEL	SMA9_CAEEL	EGL27_CAEEL	ZNFX1_CAEEL	ZTF11_CAEEL	NAS10_CAEEL	NAS33_CAEEL	NHR43_CAEEL	NHR1_CAEEL	NHR2_CAEEL	GEI17_CAEEL	G5EGF4_CAEEL	G5EF97_CAEEL	G5EGN3_CAEEL	A0A0K3AWS4_CAEEL	A0A0K3ARG6_CAEEL	Q19723_CAEEL	A0A0K3AUG2_CAEEL	A0A0K3AQX8_CAEEL	A0A0K3AWS8_CAEEL	W6SB62_CAEEL	G1K845_CAEEL	A0A0K3AQX3_CAEEL	A0A168H9W7_CAEEL	Q86S28_CAEEL	A0A163VU15_CAEEL	Q23368_CAEEL	A0A0S4XR36_CAEEL	Q19371_CAEEL	W6RXQ9_CAEEL	H2KYJ7_CAEEL	O01808_CAEEL
biological_process	GO:0045944	positive regulation of transcription by RNA polymerase II	62	228	0.27193	1	2.06619e-17	1	0	TLP1_CAEEL	HIF1_CAEEL	LAG3_CAEEL	MED10_CAEEL	HSF1_CAEEL	LIN41_CAEEL	NU301_CAEEL	CBP1_CAEEL	HM20_CAEEL	HM22_CAEEL	HM36_CAEEL	CRTC1_CAEEL	BLMP1_CAEEL	DCP66_CAEEL	LIN13_CAEEL	MAB3_CAEEL	LIN59_CAEEL	ODR7_CAEEL	MEP1_CAEEL	SKN1_CAEEL	SAM10_CAEEL	SPTF3_CAEEL	UNC30_CAEEL	TBPL1_CAEEL	WRM1_CAEEL	YAP1_CAEEL	POP1_CAEEL	TRA1_CAEEL	AST1_CAEEL	APR1_CAEEL	HLH6_CAEEL	INSR_CAEEL	NHR2_CAEEL	HLH30_CAEEL	APTF1_CAEEL	CCNC_CAEEL	G5EF53_CAEEL	G5EGF4_CAEEL	G5EFL9_CAEEL	G5EGN3_CAEEL
molecular_function	GO:0000981	DNA-binding transcription factor activity, RNA polymerase II-specific	61	402	0.151741	1	9.69787e-09	1	0	SEM2_CAEEL	HIF1_CAEEL	LE607_CAEEL	EGL13_CAEEL	C2D1_CAEEL	HM20_CAEEL	HM22_CAEEL	HM36_CAEEL	DCP66_CAEEL	MAB3_CAEEL	LIM4_CAEEL	SKN1_CAEEL	TBX34_CAEEL	SPTF3_CAEEL	UNC30_CAEEL	EGL46_CAEEL	MED29_CAEEL	TBX33_CAEEL	TBX38_CAEEL	POP1_CAEEL	WBS14_CAEEL	TRA1_CAEEL	AST1_CAEEL	HLH6_CAEEL	NFYB1_CAEEL	HLH30_CAEEL	ATFS1_CAEEL	APTF1_CAEEL	G5EDU4_CAEEL	G5EGF4_CAEEL	G5EFL9_CAEEL	G5EGN3_CAEEL	G5ED14_CAEEL	O45494_CAEEL	Q8MXH4_CAEEL	Q21263_CAEEL	H9G2W8_CAEEL	Q21272_CAEEL	Q9N360_CAEEL	G5EBG6_CAEEL
cellular_component	GO:0005829	cytosol	60	639	0.0938967	0.997731	0.00351406	1	0.696	PK1_CAEEL	FOZI1_CAEEL	GYF1_CAEEL	LARP1_CAEEL	CRTC1_CAEEL	MCM5_CAEEL	PTRN1_CAEEL	MTMR6_CAEEL	PIE1_CAEEL	GLD2_CAEEL	Q95XN0_CAEEL	G5ED36_CAEEL	G5EGT1_CAEEL	G5ECB9_CAEEL	D5MCQ6_CAEEL	K8ERX1_CAEEL	D5MCQ1_CAEEL	H2KZU0_CAEEL	O44760_CAEEL	Q21900_CAEEL	Q20183_CAEEL	D5MCQ4_CAEEL	G2HJZ1_CAEEL	Q19672_CAEEL	Q9BL72_CAEEL	H2FLM3_CAEEL	Q19581_CAEEL	Q7JMF0_CAEEL	Q7Z204_CAEEL	G2HK03_CAEEL	D5MCQ5_CAEEL	Q20084_CAEEL	D5MCR5_CAEEL	K8ESL3_CAEEL	B5BM24_CAEEL	O62178_CAEEL	H2FLM1_CAEEL	D5MCR3_CAEEL	Q19579_CAEEL	Q21605_CAEEL
molecular_function	GO:0000978	RNA polymerase II cis-regulatory region sequence-specific DNA binding	59	387	0.152455	1	4.9171e-09	1	0	SEM2_CAEEL	LE607_CAEEL	EGL13_CAEEL	HSF1_CAEEL	NU301_CAEEL	C2D1_CAEEL	HM20_CAEEL	HM22_CAEEL	HM36_CAEEL	BLMP1_CAEEL	MAB3_CAEEL	LIN29_CAEEL	SKN1_CAEEL	TBX34_CAEEL	SPTF3_CAEEL	UNC30_CAEEL	EGL46_CAEEL	TBX33_CAEEL	TBX38_CAEEL	POP1_CAEEL	WBS14_CAEEL	ZNF2_CAEEL	TRA1_CAEEL	NHR1_CAEEL	NHR2_CAEEL	HLH30_CAEEL	G5EDU4_CAEEL	G5EGF4_CAEEL	G5EGN3_CAEEL	G5ED14_CAEEL	O45494_CAEEL	Q21263_CAEEL	A9D4E4_CAEEL	Q21272_CAEEL	Q9N360_CAEEL	H2KZM4_CAEEL	O01582_CAEEL	A0A0M7REQ4_CAEEL	Q9NAE4_CAEEL	Q7Z1Q1_CAEEL
biological_process	GO:0009792	embryo development ending in birth or egg hatching	59	377	0.156499	1	9.81004e-08	1	0	PLIN1_CAEEL	TAF4_CAEEL	CBP1_CAEEL	IMA3_CAEEL	DRE1_CAEEL	LIN59_CAEEL	MBK2_CAEEL	PPN1_CAEEL	SZY20_CAEEL	TAF1_CAEEL	EGL27_CAEEL	TBPL1_CAEEL	WRM1_CAEEL	MRCK_CAEEL	NLK_CAEEL	UNC51_CAEEL	TEN1_CAEEL	NIPBL_CAEEL	NUP98_CAEEL	APR1_CAEEL	MED15_CAEEL	GEI17_CAEEL	GLD2_CAEEL	GLD3_CAEEL	G5ED36_CAEEL	G5EF87_CAEEL	G5ED14_CAEEL	G5ECB9_CAEEL	G5EEI5_CAEEL	D2KT99_CAEEL	H8ESF3_CAEEL	H1ZUX0_CAEEL	Q8I103_CAEEL	H2KYC5_CAEEL	H1UBL0_CAEEL	B2D6L4_CAEEL	G2HJZ1_CAEEL	Q9U3A6_CAEEL	Q565A8_CAEEL	Q17740_CAEEL
cellular_component	GO:0045202	synapse	54	386	0.139896	1	3.54839e-10	1	0	RIM_CAEEL	DMD_CAEEL	LGC4_CAEEL	LIPA_CAEEL	GLR1_CAEEL	LIN10_CAEEL	SYG1_CAEEL	RPM1_CAEEL	SYD1_CAEEL	SLO1_CAEEL	UNC13_CAEEL	UNC37_CAEEL	ACC3_CAEEL	H7BRC9_CAEEL	G5EDN5_CAEEL	H7BRM5_CAEEL	G5EE68_CAEEL	H7BRM4_CAEEL	G5EE44_CAEEL	H7BRM7_CAEEL	A0A5E4LYK9_CAEEL	C7FZU3_CAEEL	H8ESE5_CAEEL	C7FZU4_CAEEL	Q8MQC5_CAEEL	A0A5E4LXW2_CAEEL	A0A3B1E695_CAEEL	A0A1N7SYU0_CAEEL	O01847_CAEEL	Q93791_CAEEL	H8ESE2_CAEEL	A0A1N7SYU6_CAEEL	A0A5E4M2M0_CAEEL	A0A1N7SYT1_CAEEL	Q9XWG9_CAEEL	H8ESE4_CAEEL	V6CLV8_CAEEL	A0A3B1E4Z9_CAEEL	A0A1N7SYT8_CAEEL	A0A3B1DR32_CAEEL
biological_process	GO:0002119	nematode larval development	52	268	0.19403	1	2.81279e-11	1	0	PK1_CAEEL	HSF1_CAEEL	KRAF1_CAEEL	FLH1_CAEEL	IMA3_CAEEL	DRE1_CAEEL	PTRN1_CAEEL	LIN59_CAEEL	MTMR6_CAEEL	PPN1_CAEEL	MEP1_CAEEL	SPTF3_CAEEL	EGL27_CAEEL	MRCK_CAEEL	TOR_CAEEL	ZTF11_CAEEL	SYB1_CAEEL	APR1_CAEEL	MYRF1_CAEEL	LE756_CAEEL	MED15_CAEEL	MCD1_CAEEL	DCP2_CAEEL	CNOT1_CAEEL	GLD3_CAEEL	G5ED36_CAEEL	G5EDU4_CAEEL	Q68TI8_CAEEL	G5EGF4_CAEEL	G5EF87_CAEEL	G5ED33_CAEEL	G5ED14_CAEEL	G5EFE0_CAEEL	G5EBF2_CAEEL	H8ESF3_CAEEL	Q7YTG1_CAEEL	G4S034_CAEEL	O18250_CAEEL	Q9U3A6_CAEEL	Q7YTG2_CAEEL
molecular_function	GO:0005509	calcium ion binding	52	371	0.140162	1	5.77708e-07	1	0	MUA3_CAEEL	UNC13_CAEEL	CLA1_CAEEL	DEX1_CAEEL	Q86G45_CAEEL	G5EEI5_CAEEL	Q20796_CAEEL	A0A0K3AXI3_CAEEL	A0A0K3AUL7_CAEEL	C7FZU3_CAEEL	C7FZU4_CAEEL	Q8MPY5_CAEEL	G4S034_CAEEL	A0A3B1E695_CAEEL	A0A1N7SYU0_CAEEL	Q93791_CAEEL	A0A1N7SYU6_CAEEL	A0A1N7SYW5_CAEEL	Q8MYM6_CAEEL	Q20384_CAEEL	A0A1N7SYT1_CAEEL	A0A0K3ARR7_CAEEL	Q27512_CAEEL	Q8MQ51_CAEEL	A0A3B1E4Z9_CAEEL	A0A1N7SYT8_CAEEL	A0A3B1DR32_CAEEL	H2L2C8_CAEEL	A0A1N7SYT0_CAEEL	A0A0K3AS36_CAEEL	G5EDN9_CAEEL	Q7JMT5_CAEEL	A0A1N7SYV5_CAEEL	Q9U2T9_CAEEL	A0A1N7SYV7_CAEEL	A0A1C3NSH2_CAEEL	A0A1N7SYU4_CAEEL	A0A0K3AUN1_CAEEL	Q21408_CAEEL	H2L2C9_CAEEL
molecular_function	GO:0003677	DNA binding	43	311	0.138264	1	1.22694e-13	1	0	SEA2_CAEEL	SEM2_CAEEL	TAF4_CAEEL	NCOR1_CAEEL	HM20_CAEEL	DCP66_CAEEL	LIN36_CAEEL	LIN13_CAEEL	RPAB1_CAEEL	SSL1_CAEEL	TOP3_CAEEL	TAF1_CAEEL	SOMI1_CAEEL	TAF12_CAEEL	TBPL1_CAEEL	PUF60_CAEEL	ZFP1_CAEEL	YL57_CAEEL	PIE1_CAEEL	BAZ2_CAEEL	MYRF1_CAEEL	NFYB1_CAEEL	GEI13_CAEEL	G5EE45_CAEEL	G5EF53_CAEEL	G5EEY5_CAEEL	Q19723_CAEEL	P91094_CAEEL	A0A5K1IBA7_CAEEL	A0A163VU15_CAEEL	U4PBT1_CAEEL	A0A1C3NSN7_CAEEL	Q565A2_CAEEL	X5M5M2_CAEEL	P91019_CAEEL	V6CLA3_CAEEL	A0A2C9C3N2_CAEEL	A0A168H365_CAEEL	A0A1C3NSN8_CAEEL	J7SA49_CAEEL
molecular_function	GO:0043565	sequence-specific DNA binding	42	410	0.102439	1	6.22641e-11	1	0	HM22_CAEEL	FLH1_CAEEL	LIN29_CAEEL	ODR7_CAEEL	SKN1_CAEEL	PHM2_CAEEL	UNC30_CAEEL	EGL27_CAEEL	POP1_CAEEL	TRA1_CAEEL	AST1_CAEEL	MYRF1_CAEEL	G5ED14_CAEEL	A0A0K3AWS4_CAEEL	A0A0K3ARG6_CAEEL	A0A0K3AUG2_CAEEL	A0A0K3AQX8_CAEEL	A0A0K3AWS8_CAEEL	W6SB62_CAEEL	H9G2W8_CAEEL	A0A0K3AQX3_CAEEL	A0A168H9W7_CAEEL	Q86S28_CAEEL	W6RXQ9_CAEEL	H2KYJ7_CAEEL	G4SCE4_CAEEL	Q5W611_CAEEL	W6RQQ7_CAEEL	H2KYJ8_CAEEL	A0A0K3ATV3_CAEEL	O61907_CAEEL	A0A0K3ATV0_CAEEL	Q95Q03_CAEEL	A0A0K3ARG1_CAEEL	A0A0K3AUH3_CAEEL	Q19496_CAEEL	A0A0K3AWT1_CAEEL	Q76NP4_CAEEL	A0A0K3AQW8_CAEEL	A0A0K3ATV6_CAEEL
molecular_function	GO:0003729	mRNA binding	42	174	0.241379	1	1.09784e-23	1	0	IFET1_CAEEL	LIN41_CAEEL	ROA1_CAEEL	ASD2_CAEEL	ADR1_CAEEL	FOX1_CAEEL	G5EEW7_CAEEL	G5EE68_CAEEL	G5EF97_CAEEL	H2L2D0_CAEEL	K8ERX1_CAEEL	Q2XMZ9_CAEEL	Q23487_CAEEL	Q9BLA0_CAEEL	Q18937_CAEEL	Q9TYQ2_CAEEL	Q7JMF0_CAEEL	C1P629_CAEEL	A0A486WX07_CAEEL	Q7Z145_CAEEL	B5BM24_CAEEL	G5EDE4_CAEEL	A0A0K3AR68_CAEEL	Q23191_CAEEL	Q86G94_CAEEL	Q95Y67_CAEEL	C6KRJ2_CAEEL	Q17936_CAEEL	A0A0K3ATM0_CAEEL	Q21605_CAEEL	Q9U261_CAEEL	M1ZJT7_CAEEL	I7KSC2_CAEEL	Q6A582_CAEEL	Q17935_CAEEL	O45577_CAEEL	A0A0K3AWH2_CAEEL	Q21351_CAEEL	Q9U302_CAEEL	Q21531_CAEEL
molecular_function	GO:0051015	actin filament binding	40	191	0.209424	1	1.40064e-10	1	0	FOZI1_CAEEL	TTN1_CAEEL	MYO2_CAEEL	KETN1_CAEEL	G5EGK1_CAEEL	G5ED33_CAEEL	G5EFE0_CAEEL	D0VWL6_CAEEL	A0A5E4LXR0_CAEEL	G5EDD3_CAEEL	Q7YTG1_CAEEL	A0A4V0IK63_CAEEL	G4S034_CAEEL	P91041_CAEEL	G5EFD1_CAEEL	O18250_CAEEL	G5EFW2_CAEEL	G4S9F5_CAEEL	Q7YTG2_CAEEL	A0A4V0INA2_CAEEL	A0A0K3ATT6_CAEEL	Q9BL72_CAEEL	G5ECP9_CAEEL	G5ECG8_CAEEL	H2L0I7_CAEEL	A0A4V0IN32_CAEEL	G5EFK7_CAEEL	U4PBY2_CAEEL	A0A0K3AT74_CAEEL	A0A4V0IK09_CAEEL	G5EFM4_CAEEL	H2L2C8_CAEEL	G5EEC4_CAEEL	Q21408_CAEEL	H2L2C9_CAEEL	A0A4V0IKI4_CAEEL	A0A4V6M3C1_CAEEL	Q23158_CAEEL	Q20641_CAEEL	Q9XVU8_CAEEL
biological_process	GO:0006355	regulation of transcription, DNA-templated	39	147	0.265306	1	8.27196e-34	1	0	SEM2_CAEEL	CBP1_CAEEL	LIN59_CAEEL	LIM4_CAEEL	ZTF11_CAEEL	G5EDU4_CAEEL	G5EBS4_CAEEL	A0A0K3AWS4_CAEEL	A0A0K3ARG6_CAEEL	Q7JMS5_CAEEL	A0A0K3AUG2_CAEEL	A0A0K3AQX8_CAEEL	A0A0K3AXG6_CAEEL	A0A0K3AWS8_CAEEL	A0A0K3AQX3_CAEEL	A0A4V6M3C5_CAEEL	H2KMJ3_CAEEL	Q2XMZ9_CAEEL	Q23487_CAEEL	Q9BLA0_CAEEL	Q86G95_CAEEL	A0A0S4XR43_CAEEL	A0A4V0IK80_CAEEL	G5EFX8_CAEEL	Q7Z145_CAEEL	H2L031_CAEEL	Q17936_CAEEL	A0A0K3ATV3_CAEEL	A0A0K3ATV0_CAEEL	A0A4V0IIZ5_CAEEL	A0A0K3ARG1_CAEEL	A0A0K3AUH3_CAEEL	Q20237_CAEEL	Q27420_CAEEL	A0A0K3AWT1_CAEEL	U4PEC2_CAEEL	Q17935_CAEEL	A0A0K3AQW8_CAEEL	A0A0K3ATV6_CAEEL
cellular_component	GO:0016020	membrane	38	492	0.0772358	6.5263e-31	1	0	1	PK1_CAEEL	PKD1_CAEEL	AKAP1_CAEEL	LE756_CAEEL	BLI4_CAEEL	Q7JP86_CAEEL	G5EDY8_CAEEL	G5EGI5_CAEEL	A0A1N7SYR7_CAEEL	Q09934_CAEEL	A0A5E4LYK9_CAEEL	G5EDD3_CAEEL	C7FZU3_CAEEL	A0A1N7SYN9_CAEEL	C7FZU4_CAEEL	A0A5E4LXW2_CAEEL	O01847_CAEEL	G5EFD1_CAEEL	A0A1N7SYP3_CAEEL	Q93791_CAEEL	Q9N3Y1_CAEEL	G5EFW2_CAEEL	Q95QX5_CAEEL	G5ECP9_CAEEL	G5ECG8_CAEEL	H2FLM3_CAEEL	Q8WQC9_CAEEL	X5M5V2_CAEEL	A0A5E4M2M0_CAEEL	G5EFK7_CAEEL	A0A1N7SYN7_CAEEL	G5EFM4_CAEEL	H2FLM1_CAEEL	X5LX93_CAEEL	A0A5E4LWH4_CAEEL	G5EEC4_CAEEL	H2FLM2_CAEEL	G5EFJ7_CAEEL
biological_process	GO:0035556	intracellular signal transduction	37	311	0.118971	0.999874	0.000203092	1	0.189	PK1_CAEEL	PAR1_CAEEL	TLK1_CAEEL	MRCK_CAEEL	UNC13_CAEEL	NLK_CAEEL	SULU_CAEEL	HDA4_CAEEL	GCY23_CAEEL	G5EDN5_CAEEL	V6CJK3_CAEEL	V6CKR7_CAEEL	A0A0K3AXI3_CAEEL	A0A0K3AUL7_CAEEL	Q8MQC5_CAEEL	A0A0K3AS73_CAEEL	A0A0K3AVQ9_CAEEL	G5EE25_CAEEL	A0A0K3AUZ7_CAEEL	A0A0K3ARR7_CAEEL	A0A0K3AUI8_CAEEL	H2KZ17_CAEEL	A0A0K3AQZ1_CAEEL	V6CM38_CAEEL	G5EDN9_CAEEL	A0A1C3NSH2_CAEEL	A0A0K3AUN1_CAEEL	V6CM34_CAEEL	A0A0K3AV92_CAEEL	A0A0K3AVA5_CAEEL	A0A0K3ARQ7_CAEEL	A0A0K3AS90_CAEEL	A0A0K3AS71_CAEEL	A0A0K3AS80_CAEEL	A0A1C3NSN5_CAEEL	A0A1C3NSL4_CAEEL	A0A0K3AXJ6_CAEEL
cellular_component	GO:0005856	cytoskeleton	36	199	0.180905	1	1.03419e-10	1	0	DMD_CAEEL	NUMB1_CAEEL	MBK2_CAEEL	MRCK_CAEEL	SULU_CAEEL	G5ECZ1_CAEEL	G5EGK1_CAEEL	Q7JP86_CAEEL	Q9XXK4_CAEEL	A0A061AIT4_CAEEL	H2KY79_CAEEL	G5EFD1_CAEEL	A0A1N7SYP3_CAEEL	A0A061AKJ3_CAEEL	A0A061ACE0_CAEEL	G5EFW2_CAEEL	G4S9F5_CAEEL	A0A0K3ATT6_CAEEL	G5ECP9_CAEEL	G5ECG8_CAEEL	A0A1C3NSP3_CAEEL	V6CLV8_CAEEL	G5EFK7_CAEEL	A0A1N7SYN7_CAEEL	H2KYX2_CAEEL	G5EFM4_CAEEL	G5EGL0_CAEEL	Q9GP93_CAEEL	Q17490_CAEEL	G5EEC4_CAEEL	Q8MQG0_CAEEL	Q95XN3_CAEEL	G5ECW4_CAEEL	Q5LK46_CAEEL	H2KZV9_CAEEL	H2KYX3_CAEEL
cellular_component	GO:0005912	adherens junction	32	106	0.301887	1	7.63747e-15	1	0	SRBS1_CAEEL	PAR3_CAEEL	PAC1_CAEEL	WRM1_CAEEL	APR1_CAEEL	KIN20_CAEEL	X5LX73_CAEEL	M1ZJY5_CAEEL	X5LX70_CAEEL	Q8I103_CAEEL	X5LPT9_CAEEL	H2KYC5_CAEEL	Q9BIC1_CAEEL	X5LV54_CAEEL	A0A2C9C357_CAEEL	H1UBL0_CAEEL	X5LPU4_CAEEL	X5M5Q5_CAEEL	X5M8U5_CAEEL	X5M8V1_CAEEL	H2KYX2_CAEEL	Q56VX4_CAEEL	H1UBK9_CAEEL	Q9GP93_CAEEL	Q95ZY7_CAEEL	Q86NJ4_CAEEL	X5M5P8_CAEEL	Q5LK46_CAEEL	Q86NJ3_CAEEL	H2KZV9_CAEEL	Q20641_CAEEL	H2KYX3_CAEEL
biological_process	GO:0008340	determination of adult lifespan	30	285	0.105263	0.966329	0.0521	1	1	SEA2_CAEEL	HIF1_CAEEL	HIPK_CAEEL	HSF1_CAEEL	CRTC1_CAEEL	BLMP1_CAEEL	SKN1_CAEEL	SMA9_CAEEL	SET9_CAEEL	NPHP1_CAEEL	WBS14_CAEEL	TOR_CAEEL	UNC51_CAEEL	BNIP3_CAEEL	HECD1_CAEEL	INSR_CAEEL	HLH30_CAEEL	MED15_CAEEL	DCP2_CAEEL	ADR1_CAEEL	G5EF03_CAEEL	G5EDU4_CAEEL	A7KQE9_CAEEL	G5EF88_CAEEL	A8DYS0_CAEEL	A8DYS1_CAEEL	G5EEV7_CAEEL	Q9BHK7_CAEEL	A8DYR9_CAEEL	A8DYS3_CAEEL
biological_process	GO:0040011	locomotion	30	132	0.227273	0.999997	5.62502e-06	1	0.001	RIM_CAEEL	LIPA_CAEEL	JIP_CAEEL	PICAL_CAEEL	LIN59_CAEEL	SIN3_CAEEL	RPM1_CAEEL	SYD1_CAEEL	SLO1_CAEEL	UN119_CAEEL	UN112_CAEEL	MYSP_CAEEL	MACO1_CAEEL	MED15_CAEEL	H7BRC9_CAEEL	H7BRM5_CAEEL	G5EDU4_CAEEL	H7BRM4_CAEEL	H7BRM7_CAEEL	G5EEI5_CAEEL	H8ESE5_CAEEL	H8ESE2_CAEEL	G5EGP9_CAEEL	H8ESE4_CAEEL	Q22667_CAEEL	Q17490_CAEEL	H8ESD6_CAEEL	H8ESD8_CAEEL	Q20641_CAEEL	H8ESE3_CAEEL
molecular_function	GO:0003730	mRNA 3'-UTR binding	29	69	0.42029	1	1.89467e-16	1	0	PIE1_CAEEL	DAZ1_CAEEL	G5ECB9_CAEEL	D5MCQ6_CAEEL	K8ERX1_CAEEL	D5MCQ1_CAEEL	H2KZU0_CAEEL	O44760_CAEEL	Q21900_CAEEL	D5MCQ4_CAEEL	G2HJZ1_CAEEL	Q19581_CAEEL	Q7Z204_CAEEL	D5MCQ5_CAEEL	Q20084_CAEEL	D5MCR5_CAEEL	Q23191_CAEEL	D5MCR3_CAEEL	Q19579_CAEEL	Q21605_CAEEL	D5MCQ2_CAEEL	D5MCQ8_CAEEL	Q6A582_CAEEL	Q9U302_CAEEL	D5MCQ7_CAEEL	D5MCR4_CAEEL	D5MCQ3_CAEEL	Q7JMB8_CAEEL	K8FE02_CAEEL
molecular_function	GO:0003700	DNA-binding transcription factor activity	28	378	0.0740741	0.999978	3.72302e-05	1	0.018	HIF1_CAEEL	HSF1_CAEEL	FLH1_CAEEL	BLMP1_CAEEL	LIM4_CAEEL	ODR7_CAEEL	SKN1_CAEEL	POP1_CAEEL	MYRF1_CAEEL	NHR43_CAEEL	ATFS1_CAEEL	G5EDU4_CAEEL	G5EGF4_CAEEL	G5ED14_CAEEL	W6SB62_CAEEL	A9D4E4_CAEEL	W6RXQ9_CAEEL	H2KYJ7_CAEEL	V6CLA3_CAEEL	G4SCE4_CAEEL	Q5W611_CAEEL	W6RQQ7_CAEEL	H2KYJ8_CAEEL	H2KZR6_CAEEL	Q19807_CAEEL	Q19496_CAEEL	H2KZB8_CAEEL	Q95QR2_CAEEL
cellular_component	GO:1990904	ribonucleoprotein complex	28	66	0.424242	0.999995	1.05035e-05	1	0.001	ROA1_CAEEL	ASD2_CAEEL	G5EE68_CAEEL	D5MCQ6_CAEEL	D5MCQ1_CAEEL	Q8MXR2_CAEEL	D4YW53_CAEEL	Q21900_CAEEL	D5MCQ4_CAEEL	Q19581_CAEEL	Q7Z204_CAEEL	D5MCQ5_CAEEL	Q20084_CAEEL	D5MCR5_CAEEL	A0A0K3AR68_CAEEL	V6CLR1_CAEEL	A0A0K3ATM0_CAEEL	D5MCR3_CAEEL	Q19579_CAEEL	D5MCQ2_CAEEL	D5MCQ8_CAEEL	A0A0K3AWH2_CAEEL	Q21351_CAEEL	Q9U302_CAEEL	D5MCQ7_CAEEL	D5MCR4_CAEEL	D5MCQ3_CAEEL	Q7JMB8_CAEEL
molecular_function	GO:0003779	actin binding	28	89	0.314607	1	8.38534e-18	1	0	DMD_CAEEL	G5ED33_CAEEL	G5EFE0_CAEEL	A0A1N7SYR7_CAEEL	A0A061AKT4_CAEEL	Q7YTG1_CAEEL	A0A061ACP8_CAEEL	Q95YA9_CAEEL	A0A1N7SYN9_CAEEL	A0A0K3AQU9_CAEEL	Q7JP75_CAEEL	O18250_CAEEL	Q7YTG2_CAEEL	A0A1C3NSH3_CAEEL	A0A061ADW6_CAEEL	A0A061ACM2_CAEEL	A0A4V0IJW4_CAEEL	V6CLV8_CAEEL	Q95Y95_CAEEL	H2KYX2_CAEEL	Q8MQE6_CAEEL	Q95XN3_CAEEL	A0A4V6M3U0_CAEEL	H2KYI3_CAEEL	A0A7R9SVK3_CAEEL	Q5LK46_CAEEL	A0A061AJ42_CAEEL	H2KYX3_CAEEL
biological_process	GO:0034765	regulation of ion transmembrane transport	28	91	0.307692	1	1.97515e-08	1	0	SLO1_CAEEL	G5EDN5_CAEEL	G5EE44_CAEEL	Q86G45_CAEEL	J3K003_CAEEL	Q18351_CAEEL	Q8MQC5_CAEEL	Q8MPY5_CAEEL	A0A3B1E695_CAEEL	A0A1N7SYU0_CAEEL	D5MCS0_CAEEL	A0A1N7SYU6_CAEEL	A0A1N7SYT1_CAEEL	Q9XWG9_CAEEL	A0A3B1E4Z9_CAEEL	A0A1N7SYT8_CAEEL	A0A3B1DR32_CAEEL	A0A1N7SYT0_CAEEL	D9N131_CAEEL	A7UQ08_CAEEL	B7FAS2_CAEEL	A0A1N7SYV5_CAEEL	H9G2X0_CAEEL	A0A1N7SYV7_CAEEL	A0A1N7SYU4_CAEEL	D9N132_CAEEL	D9N133_CAEEL	A0A3B1E663_CAEEL
molecular_function	GO:0003682	chromatin binding	27	85	0.317647	1	7.70063e-10	1	0	HSF1_CAEEL	LIN59_CAEEL	RING2_CAEEL	SPTF3_CAEEL	EGL27_CAEEL	ZFP1_CAEEL	NIPBL_CAEEL	A0A0K3AWS4_CAEEL	Q1XFY2_CAEEL	A0A0K3ARG6_CAEEL	G5EEY5_CAEEL	A0A0K3AUG2_CAEEL	Q9XXU5_CAEEL	A0A0K3AWS8_CAEEL	A0A0K3AQX3_CAEEL	A0A168H9W7_CAEEL	Q86S28_CAEEL	Q565A2_CAEEL	A0A0K3ATV3_CAEEL	O61907_CAEEL	A0A0K3ATV0_CAEEL	Q9TZM9_CAEEL	A0A0K3ARG1_CAEEL	Q76NP4_CAEEL	A0A0K3AQW8_CAEEL	A0A0K3ATV6_CAEEL	A0A131MBD0_CAEEL
cellular_component	GO:0055120	striated muscle dense body	26	153	0.169935	1	8.11641e-07	1	0	DMD_CAEEL	SLO1_CAEEL	UN112_CAEEL	TENSH_CAEEL	CPNA1_CAEEL	DYC1_CAEEL	H7BRC9_CAEEL	H7BRM5_CAEEL	G5EGK1_CAEEL	H7BRM4_CAEEL	H7BRM7_CAEEL	O61980_CAEEL	H8ESE5_CAEEL	H8ESE2_CAEEL	G4S9F5_CAEEL	H8ESE4_CAEEL	H2L2C8_CAEEL	H8ESD6_CAEEL	Q95XN3_CAEEL	H2L2C9_CAEEL	H2L0S5_CAEEL	Q3V5J3_CAEEL	Q23158_CAEEL	H8ESD8_CAEEL	Q9XVU8_CAEEL	H8ESE3_CAEEL
biological_process	GO:0010468	regulation of gene expression	26	118	0.220339	1	3.59643e-58	1	0	BLMP1_CAEEL	LIN13_CAEEL	MEP1_CAEEL	SKN1_CAEEL	TRA1_CAEEL	NIPBL_CAEEL	NFYB1_CAEEL	INSR_CAEEL	MED15_CAEEL	CNOT1_CAEEL	GEI17_CAEEL	ATX2_CAEEL	ATFS1_CAEEL	FOX1_CAEEL	K8ERX1_CAEEL	Q2XMZ9_CAEEL	Q23487_CAEEL	Q9BLA0_CAEEL	Q7Z145_CAEEL	Q95Y67_CAEEL	Q17936_CAEEL	Q21605_CAEEL	Q6A582_CAEEL	Q17935_CAEEL	H2L067_CAEEL	K8FE02_CAEEL
biological_process	GO:0007268	chemical synaptic transmission	26	245	0.106122	0.998029	0.00326249	1	0.953	LGC4_CAEEL	LIN10_CAEEL	UNC37_CAEEL	ACC3_CAEEL	Q86G45_CAEEL	Q8MPY5_CAEEL	A0A3B1E695_CAEEL	A0A1N7SYU0_CAEEL	A0A1N7SYU6_CAEEL	A0A1N7SYT1_CAEEL	V6CLV8_CAEEL	O01661_CAEEL	A0A3B1E4Z9_CAEEL	A0A1N7SYT8_CAEEL	A0A3B1DR32_CAEEL	A0A1N7SYT0_CAEEL	V6CLR8_CAEEL	G5EDN9_CAEEL	A0A1N7SYV5_CAEEL	A0A1N7SYV7_CAEEL	A0A1C3NSH2_CAEEL	A0A1N7SYU4_CAEEL	A0A3B1E663_CAEEL	V6CJD7_CAEEL	A0A1C3NSN5_CAEEL	A0A1C3NSL4_CAEEL
molecular_function	GO:0004712	protein serine/threonine/tyrosine kinase activity	25	253	0.0988142	0.962092	0.0602732	1	1	PK1_CAEEL	HIPK_CAEEL	MBK1_CAEEL	KRAF1_CAEEL	MBK2_CAEEL	SID3_CAEEL	PAR1_CAEEL	TTN1_CAEEL	TLK1_CAEEL	MRCK_CAEEL	TOR_CAEEL	NLK_CAEEL	SULU_CAEEL	UNC51_CAEEL	INSR_CAEEL	KIN20_CAEEL	CDK8_CAEEL	A0A061AKR6_CAEEL	A0A0K3ARZ1_CAEEL	A0A0K3AS73_CAEEL	A0A0K3AVQ9_CAEEL	G5EE25_CAEEL	A0A0K3AUZ7_CAEEL	A0A0K3AUY1_CAEEL	A0A0K3AXA0_CAEEL
cellular_component	GO:0030424	axon	25	286	0.0874126	0.967935	0.0511654	1	1	PK1_CAEEL	RIM_CAEEL	LIPA_CAEEL	JIP_CAEEL	PTRN1_CAEEL	SYG1_CAEEL	RPM1_CAEEL	UN119_CAEEL	SYB1_CAEEL	TUB1_CAEEL	TENSH_CAEEL	UNC51_CAEEL	INSR_CAEEL	CLA1_CAEEL	DYC1_CAEEL	I1W6S5_CAEEL	Q10929_CAEEL	S6EZU2_CAEEL	O01847_CAEEL	Q8MQ20_CAEEL	G5EGP9_CAEEL	G5ECI9_CAEEL	Q21875_CAEEL	Q20888_CAEEL	Q22354_CAEEL
cellular_component	GO:0043186	P granule	24	109	0.220183	1	1.33024e-08	1	0	IFET1_CAEEL	DDX3_CAEEL	MBK2_CAEEL	PAR3_CAEEL	PGL1_CAEEL	PAR1_CAEEL	PIE1_CAEEL	NUP98_CAEEL	GLS1_CAEEL	DCP2_CAEEL	ASD2_CAEEL	GLD2_CAEEL	GLD3_CAEEL	G5ECB9_CAEEL	Q21126_CAEEL	D4YW53_CAEEL	Q9N3F4_CAEEL	Q95R07_CAEEL	G2HJZ1_CAEEL	Q304E5_CAEEL	H2L067_CAEEL	Q9U302_CAEEL	Q65XX1_CAEEL	Q95XY1_CAEEL
molecular_function	GO:0004674	protein serine/threonine kinase activity	24	338	0.0710059	0.364002	0.709012	1	1	PK1_CAEEL	HIPK_CAEEL	MBK1_CAEEL	KRAF1_CAEEL	MBK2_CAEEL	TAF1_CAEEL	PAR1_CAEEL	TTN1_CAEEL	TLK1_CAEEL	MRCK_CAEEL	TOR_CAEEL	NLK_CAEEL	SULU_CAEEL	UNC51_CAEEL	KIN20_CAEEL	V6CJK3_CAEEL	V6CKR7_CAEEL	A0A061AKR6_CAEEL	A0A0K3AS73_CAEEL	A0A2X0T496_CAEEL	A0A0K3AVQ9_CAEEL	A0A0K3AUZ7_CAEEL	V6CM38_CAEEL	V6CM34_CAEEL
biological_process	GO:0030154	cell differentiation	24	248	0.0967742	1	8.02721e-14	1	0	PER_CAEEL	SEA2_CAEEL	SEM2_CAEEL	DDX3_CAEEL	HM22_CAEEL	MAB3_CAEEL	PAR3_CAEEL	SID3_CAEEL	SYD1_CAEEL	SOMI1_CAEEL	TRA1_CAEEL	AST1_CAEEL	MYRF1_CAEEL	NHR1_CAEEL	NHR2_CAEEL	LE756_CAEEL	FOX1_CAEEL	X5LPT9_CAEEL	Q9BIC1_CAEEL	Q9N3F4_CAEEL	Q86NJ4_CAEEL	Q65XX1_CAEEL	Q86NJ3_CAEEL	Q95XY1_CAEEL
molecular_function	GO:0005516	calmodulin binding	24	103	0.23301	1	8.27892e-08	1	0	HSF1_CAEEL	PTRN1_CAEEL	UNC13_CAEEL	HDA4_CAEEL	G5EDN5_CAEEL	G5EE44_CAEEL	U4PS34_CAEEL	Q8MQC5_CAEEL	G4S034_CAEEL	U4PF78_CAEEL	U4PCE2_CAEEL	Q9U3C1_CAEEL	Q9XWG9_CAEEL	U4PMS5_CAEEL	Q21295_CAEEL	U4PC02_CAEEL	B7FAS2_CAEEL	H2L0I6_CAEEL	Q21408_CAEEL	U4PCD4_CAEEL	U4PC07_CAEEL	U4PF86_CAEEL	Q9U3B9_CAEEL	H2L0I5_CAEEL
molecular_function	GO:0005249	voltage-gated potassium channel activity	24	61	0.393443	1	1.04412e-09	1	0	SLO1_CAEEL	H7BRC9_CAEEL	G5EDN5_CAEEL	H7BRM5_CAEEL	H7BRM4_CAEEL	G5EE44_CAEEL	H7BRM7_CAEEL	J3K003_CAEEL	Q18351_CAEEL	H8ESE5_CAEEL	Q8MQC5_CAEEL	D5MCS0_CAEEL	H8ESE2_CAEEL	Q9XWG9_CAEEL	H8ESE4_CAEEL	D9N131_CAEEL	A7UQ08_CAEEL	B7FAS2_CAEEL	H9G2X0_CAEEL	D9N132_CAEEL	H8ESD6_CAEEL	D9N133_CAEEL	H8ESD8_CAEEL	H8ESE3_CAEEL
molecular_function	GO:0050839	cell adhesion molecule binding	24	41	0.585366	1	1.94561e-18	1	0	SYG1_CAEEL	UN112_CAEEL	G5ECZ1_CAEEL	X5LX73_CAEEL	M1ZJY5_CAEEL	X5LX70_CAEEL	Q8I103_CAEEL	Q5TYL6_CAEEL	X5LPT9_CAEEL	Q9BIC1_CAEEL	X5LV54_CAEEL	A0A2C9C357_CAEEL	H1UBL0_CAEEL	X5LPU4_CAEEL	X5M5Q5_CAEEL	X5M8U5_CAEEL	X5M8V1_CAEEL	Q56VX4_CAEEL	H1UBK9_CAEEL	Q86NJ4_CAEEL	Q17490_CAEEL	Q8MQG0_CAEEL	X5M5P8_CAEEL	Q86NJ3_CAEEL
molecular_function	GO:0031267	small GTPase binding	23	89	0.258427	1	1.92815e-08	1	0	RIM_CAEEL	KRAF1_CAEEL	LIN10_CAEEL	SYD1_CAEEL	UNC89_CAEEL	A0A5E4LYK9_CAEEL	A0A5E4LXW2_CAEEL	A0A3P6N624_CAEEL	Q7JP75_CAEEL	A0A3P6PAV3_CAEEL	Q9BL72_CAEEL	A0A3P6PCP8_CAEEL	A0A5E4M2M0_CAEEL	A0A3P6NI91_CAEEL	Q8MQE6_CAEEL	A0A131MBF9_CAEEL	A0A5E4LWH4_CAEEL	O62332_CAEEL	D0Z5P0_CAEEL	H2KYI3_CAEEL	A0A7R9SVK3_CAEEL	Q23089_CAEEL	Q22354_CAEEL
biological_process	GO:0000381	regulation of alternative mRNA splicing, via spliceosome	23	44	0.522727	1	7.57278e-15	1	0	MBL_CAEEL	PUF60_CAEEL	ASD2_CAEEL	FOX1_CAEEL	G5EEW7_CAEEL	G5EE68_CAEEL	H2L2D0_CAEEL	D4YW53_CAEEL	Q2XMZ9_CAEEL	Q23487_CAEEL	Q9BLA0_CAEEL	Q20084_CAEEL	Q7Z145_CAEEL	A0A0K3AR68_CAEEL	Q86G94_CAEEL	Q17936_CAEEL	A0A0K3ATM0_CAEEL	Q9XWV4_CAEEL	M1ZJT7_CAEEL	Q17935_CAEEL	A0A0K3AWH2_CAEEL	Q9N3F7_CAEEL	G5EE97_CAEEL
biological_process	GO:0000122	negative regulation of transcription by RNA polymerase II	22	118	0.186441	0.999973	8.14383e-05	1	0.079	PER_CAEEL	BLMP1_CAEEL	DCP66_CAEEL	MAB3_CAEEL	SIN3_CAEEL	EGL46_CAEEL	TBPL1_CAEEL	WBS14_CAEEL	TRA1_CAEEL	PIE1_CAEEL	HDA4_CAEEL	NHR2_CAEEL	G5EGF4_CAEEL	G5EGN3_CAEEL	Q9XXU5_CAEEL	A0A168H9W7_CAEEL	Q86S28_CAEEL	Q86G95_CAEEL	O61907_CAEEL	Q20237_CAEEL	Q76NP4_CAEEL	U4PMB4_CAEEL
cellular_component	GO:0030056	hemidesmosome	22	36	0.611111	1	1.01306e-18	1	0	PK1_CAEEL	MUA3_CAEEL	IFA2_CAEEL	Q9UB29_CAEEL	Q9UB28_CAEEL	G5ED33_CAEEL	G5EFE0_CAEEL	A0A1N7SYR7_CAEEL	G5EDD3_CAEEL	Q7YTG1_CAEEL	A0A1N7SYN9_CAEEL	G5EFD1_CAEEL	A0A1N7SYP3_CAEEL	O18250_CAEEL	G5EFW2_CAEEL	Q7YTG2_CAEEL	G5ECP9_CAEEL	G5ECG8_CAEEL	G5EFK7_CAEEL	A0A1N7SYN7_CAEEL	G5EFM4_CAEEL	G5EEC4_CAEEL
molecular_function	GO:0004672	protein kinase activity	21	146	0.143836	0.787989	0.2606	1	1	PK1_CAEEL	KRAF1_CAEEL	MBK2_CAEEL	UNC89_CAEEL	TLK1_CAEEL	TOR_CAEEL	NLK_CAEEL	UNC51_CAEEL	GCY23_CAEEL	Q2XN10_CAEEL	A0A2C9C2W9_CAEEL	A0A2C9C3B7_CAEEL	A0A2C9C2V5_CAEEL	A0A2C9C2G8_CAEEL	G3MTX3_CAEEL	A0A2C9C2V3_CAEEL	A0A2C9C376_CAEEL	A0A2I2LG13_CAEEL	A0A2I2LDV7_CAEEL	A0A2C9C332_CAEEL	A0A2C9C2S8_CAEEL
cellular_component	GO:0005654	nucleoplasm	21	121	0.173554	1	6.51719e-14	1	0	IMA3_CAEEL	MBL_CAEEL	SOR1_CAEEL	LE756_CAEEL	CND1_CAEEL	G5ED20_CAEEL	Q9U203_CAEEL	A0A168H9W7_CAEEL	Q8MXR2_CAEEL	Q86S28_CAEEL	G5EGQ8_CAEEL	X5M5M2_CAEEL	P91019_CAEEL	G5EDY1_CAEEL	V6CLR1_CAEEL	O61907_CAEEL	Q9U202_CAEEL	Q76NP4_CAEEL	I7KSC2_CAEEL	J7SA49_CAEEL	Q9N3F7_CAEEL
biological_process	GO:0009888	tissue development	21	49	0.428571	1	3.62021e-11	1	0	NFYB1_CAEEL	G5EGF4_CAEEL	G5EGN3_CAEEL	A0A0K3AWS4_CAEEL	A0A0K3ARG6_CAEEL	A0A0K3AUG2_CAEEL	A0A0K3AQX8_CAEEL	A0A0K3AWS8_CAEEL	A0A0K3AQX3_CAEEL	A0A168H9W7_CAEEL	Q86S28_CAEEL	A0A0K3ATV3_CAEEL	O61907_CAEEL	A0A0K3ATV0_CAEEL	A0A0K3ARG1_CAEEL	A0A0K3AUH3_CAEEL	A0A0K3AWT1_CAEEL	Q76NP4_CAEEL	A0A0K3AQW8_CAEEL	A0A0K3ATV6_CAEEL	U4PMB4_CAEEL
molecular_function	GO:0042393	histone binding	21	64	0.328125	1	3.49767e-07	1	0	SSL1_CAEEL	CND1_CAEEL	G5EF53_CAEEL	G5EF87_CAEEL	A0A3P6P9B9_CAEEL	G5EGI1_CAEEL	H8ESF3_CAEEL	P91094_CAEEL	A0A3P6NNV9_CAEEL	A0A3P6MYA1_CAEEL	H8ESF4_CAEEL	K8F7U3_CAEEL	K8ES81_CAEEL	K8ERR8_CAEEL	G5EGU3_CAEEL	A0A3P6NPD2_CAEEL	G5EBH5_CAEEL	D7SFM3_CAEEL	A0A3P6N6K6_CAEEL	K8ESF3_CAEEL	G5EGP0_CAEEL
molecular_function	GO:0106310	protein serine kinase activity	20	183	0.10929	0.986136	0.0258275	1	1	PK1_CAEEL	HIPK_CAEEL	MBK1_CAEEL	KRAF1_CAEEL	MBK2_CAEEL	PAR1_CAEEL	TTN1_CAEEL	TLK1_CAEEL	MRCK_CAEEL	TOR_CAEEL	NLK_CAEEL	SULU_CAEEL	UNC51_CAEEL	KIN20_CAEEL	CDK8_CAEEL	A0A061AKR6_CAEEL	A0A0K3AS73_CAEEL	A0A0K3AVQ9_CAEEL	G5EE25_CAEEL	A0A0K3AUZ7_CAEEL
biological_process	GO:0000003	reproduction	20	121	0.165289	0.999982	2.865e-05	1	0.021	KRAF1_CAEEL	LIN13_CAEEL	IMA3_CAEEL	RING2_CAEEL	PGL1_CAEEL	PAN3_CAEEL	UN119_CAEEL	APR1_CAEEL	INSR_CAEEL	DCP2_CAEEL	G5ED20_CAEEL	G5EF87_CAEEL	Q21126_CAEEL	H8ESF3_CAEEL	G5EGP9_CAEEL	H8ESF4_CAEEL	Q304E5_CAEEL	Q9U3C1_CAEEL	Q21295_CAEEL	Q9U3B9_CAEEL
cellular_component	GO:0005887	integral component of plasma membrane	20	841	0.0237812	0.00138713	0.999203	0.081	1	LGC4_CAEEL	NUMB1_CAEEL	SYG1_CAEEL	UNC89_CAEEL	ACC3_CAEEL	INSR_CAEEL	G5EGI5_CAEEL	Q7JKP1_CAEEL	A0A2X0REA8_CAEEL	O45799_CAEEL	A0A2X0RCW6_CAEEL	A0A2X0SX30_CAEEL	Q18077_CAEEL	Q22250_CAEEL	G3MU68_CAEEL	A0A2X0RDZ3_CAEEL	A0A2X0REL6_CAEEL	A0A2X0RQ43_CAEEL	Q9XVQ0_CAEEL	Q9N3C7_CAEEL
biological_process	GO:0007165	signal transduction	20	387	0.0516796	0.614186	0.420978	1	1	LGC4_CAEEL	SYD1_CAEEL	ACC3_CAEEL	HDA4_CAEEL	GCY23_CAEEL	G5ECZ1_CAEEL	Q7JP86_CAEEL	V6CLS7_CAEEL	V6CLR6_CAEEL	Q5TYL6_CAEEL	X5LPT9_CAEEL	Q9BIC1_CAEEL	U4PBA1_CAEEL	Q22250_CAEEL	Q95QX5_CAEEL	U4PRC7_CAEEL	Q86NJ4_CAEEL	Q8MQG0_CAEEL	U4PM34_CAEEL	Q86NJ3_CAEEL
biological_process	GO:0017148	negative regulation of translation	20	46	0.434783	1	6.354e-12	1	0	IFET1_CAEEL	LIN41_CAEEL	CNOT1_CAEEL	D5MCQ6_CAEEL	D5MCQ1_CAEEL	Q21900_CAEEL	Q95R07_CAEEL	D5MCQ4_CAEEL	Q7Z204_CAEEL	D5MCQ5_CAEEL	D5MCR5_CAEEL	Q23191_CAEEL	D5MCR3_CAEEL	D5MCQ2_CAEEL	D5MCQ8_CAEEL	H2L067_CAEEL	D5MCQ7_CAEEL	D5MCR4_CAEEL	D5MCQ3_CAEEL	Q7JMB8_CAEEL
molecular_function	GO:0008266	poly(U) RNA binding	20	23	0.869565	1	6.225e-21	1	0	LARP1_CAEEL	FOX1_CAEEL	D5MCQ6_CAEEL	D5MCQ1_CAEEL	Q21900_CAEEL	D5MCQ4_CAEEL	Q19581_CAEEL	Q7Z204_CAEEL	D5MCQ5_CAEEL	Q20084_CAEEL	D5MCR5_CAEEL	D5MCR3_CAEEL	Q19579_CAEEL	D5MCQ2_CAEEL	D5MCQ8_CAEEL	Q9U302_CAEEL	D5MCQ7_CAEEL	D5MCR4_CAEEL	D5MCQ3_CAEEL	Q7JMB8_CAEEL
cellular_component	GO:0031430	M band	20	61	0.327869	1	1.12274e-10	1	0	UNC89_CAEEL	SLO1_CAEEL	UN112_CAEEL	TENSH_CAEEL	KETN1_CAEEL	CPNA1_CAEEL	H7BRC9_CAEEL	H7BRM5_CAEEL	G5EGK1_CAEEL	H7BRM4_CAEEL	H7BRM7_CAEEL	O61980_CAEEL	H8ESE5_CAEEL	H8ESE2_CAEEL	G4S9F5_CAEEL	H8ESE4_CAEEL	H8ESD6_CAEEL	Q95XN3_CAEEL	H8ESD8_CAEEL	H8ESE3_CAEEL
molecular_function	GO:0008143	poly(A) binding	20	24	0.833333	1	3.49637e-20	1	0	PAN3_CAEEL	FOX1_CAEEL	D5MCQ6_CAEEL	D5MCQ1_CAEEL	Q21900_CAEEL	D5MCQ4_CAEEL	Q19581_CAEEL	Q7Z204_CAEEL	D5MCQ5_CAEEL	Q20084_CAEEL	D5MCR5_CAEEL	D5MCR3_CAEEL	Q19579_CAEEL	D5MCQ2_CAEEL	D5MCQ8_CAEEL	Q9U302_CAEEL	D5MCQ7_CAEEL	D5MCR4_CAEEL	D5MCQ3_CAEEL	Q7JMB8_CAEEL
biological_process	GO:0001708	cell fate specification	19	80	0.2375	1	3.57163e-10	1	0	EGL13_CAEEL	KRAF1_CAEEL	HM22_CAEEL	LIN29_CAEEL	LIM4_CAEEL	SIN3_CAEEL	SKN1_CAEEL	TBX34_CAEEL	EGL27_CAEEL	TBX33_CAEEL	TBX38_CAEEL	APR1_CAEEL	G5EDU4_CAEEL	G5EGF4_CAEEL	G5ED14_CAEEL	G5ECB9_CAEEL	Q95R07_CAEEL	G2HJZ1_CAEEL	H2L067_CAEEL
molecular_function	GO:0003713	transcription coactivator activity	19	56	0.339286	1	1.49683e-11	1	0	LAG3_CAEEL	MBK1_CAEEL	CBP1_CAEEL	SMA9_CAEEL	WRM1_CAEEL	YAP1_CAEEL	MED12_CAEEL	MED15_CAEEL	G5EGI1_CAEEL	A0A168H9W7_CAEEL	Q86S28_CAEEL	Q86G95_CAEEL	Q9N4L9_CAEEL	Q9XVI2_CAEEL	Q965Y0_CAEEL	O61907_CAEEL	Q20237_CAEEL	Q76NP4_CAEEL	Q95ZN3_CAEEL
biological_process	GO:0006397	mRNA processing	19	75	0.253333	1	1.35506e-10	1	0	PAN3_CAEEL	SYDN_CAEEL	DHX15_CAEEL	XRN2_CAEEL	DCP2_CAEEL	ASD2_CAEEL	GLD2_CAEEL	GLD3_CAEEL	ADR1_CAEEL	H2L2D0_CAEEL	Q2XMZ9_CAEEL	Q23487_CAEEL	Q9BLA0_CAEEL	Q7Z145_CAEEL	G5EDE4_CAEEL	Q9N368_CAEEL	Q17936_CAEEL	Q17935_CAEEL	G5EE97_CAEEL
molecular_function	GO:0005085	guanyl-nucleotide exchange factor activity	19	157	0.121019	0.994705	0.0110293	1	0.993	GBF1_CAEEL	EFA6_CAEEL	UNC89_CAEEL	I1W6S5_CAEEL	Q9N2V4_CAEEL	S6EZU2_CAEEL	A0A2C9C2W9_CAEEL	A0A2C9C3B7_CAEEL	O01847_CAEEL	H2L0P5_CAEEL	H2L0P7_CAEEL	G5ECK4_CAEEL	G5EE73_CAEEL	H2L0P4_CAEEL	A0A486WXD9_CAEEL	A0A2C9C2S8_CAEEL	H2L0P6_CAEEL	Q22354_CAEEL	H2L0P8_CAEEL
molecular_function	GO:0000977	RNA polymerase II transcription regulatory region sequence-specific DNA binding	19	124	0.153226	1	8.36603e-10	1	0	HIF1_CAEEL	BED3_CAEEL	HM36_CAEEL	MAB3_CAEEL	LIN29_CAEEL	LIM4_CAEEL	SKN1_CAEEL	MED29_CAEEL	POP1_CAEEL	TRA1_CAEEL	ZIP3_CAEEL	HLH6_CAEEL	NHR43_CAEEL	ATFS1_CAEEL	APTF1_CAEEL	G5EFL9_CAEEL	G5EGN3_CAEEL	G5ED14_CAEEL	G5EBG6_CAEEL
biological_process	GO:0071805	potassium ion transmembrane transport	19	164	0.115854	0.752338	0.331608	1	1	G5EDN5_CAEEL	G5EE44_CAEEL	A0A2X0REA8_CAEEL	J3K003_CAEEL	Q18351_CAEEL	Q8MQC5_CAEEL	A0A2X0RCW6_CAEEL	A0A2X0SX30_CAEEL	D5MCS0_CAEEL	Q9XWG9_CAEEL	A0A2X0RDZ3_CAEEL	A0A2X0REL6_CAEEL	D9N131_CAEEL	A7UQ08_CAEEL	A0A2X0RQ43_CAEEL	B7FAS2_CAEEL	H9G2X0_CAEEL	D9N132_CAEEL	D9N133_CAEEL
cellular_component	GO:0110165	cellular anatomical entity	19	48	0.395833	0.515282	0.614035	1	1	D0VWL6_CAEEL	A0A0K3AXI3_CAEEL	A0A0K3AUL7_CAEEL	A0A4V0IK63_CAEEL	A0A4V0INA2_CAEEL	A0A0K3ARR7_CAEEL	A0A4V0IN32_CAEEL	A0A0K3AT74_CAEEL	A0A4V0IK09_CAEEL	A0A0K3AUN1_CAEEL	A0A0K3AV92_CAEEL	A0A0K3AVA5_CAEEL	A0A0K3ARQ7_CAEEL	A0A0K3AS90_CAEEL	A0A0K3AS71_CAEEL	A0A4V0IKI4_CAEEL	A0A0K3AS80_CAEEL	A0A4V6M3C1_CAEEL	A0A0K3AXJ6_CAEEL
biological_process	GO:0008104	protein localization	18	78	0.230769	0.999999	1.48893e-06	1	0	RIM_CAEEL	SAS6_CAEEL	LIPA_CAEEL	LIN10_CAEEL	PAR3_CAEEL	PAC1_CAEEL	NPHP1_CAEEL	Q9U3A6_CAEEL	Q22257_CAEEL	H2FLM3_CAEEL	Q8I4H0_CAEEL	H2FLM1_CAEEL	Q8I4G9_CAEEL	H2FLM2_CAEEL	G5EFJ7_CAEEL	A5JYR4_CAEEL	Q20641_CAEEL	P91857_CAEEL
biological_process	GO:0045893	positive regulation of transcription, DNA-templated	18	45	0.4	1	2.55506e-22	1	0	MBK1_CAEEL	HM20_CAEEL	POP1_CAEEL	MYRF1_CAEEL	MED15_CAEEL	G5ED20_CAEEL	G5EF87_CAEEL	A0A3P6P9B9_CAEEL	H8ESF3_CAEEL	A0A3P6NNV9_CAEEL	X5M5M2_CAEEL	P91019_CAEEL	A0A3P6MYA1_CAEEL	H8ESF4_CAEEL	A0A168H365_CAEEL	A0A3P6NPD2_CAEEL	A0A3P6N6K6_CAEEL	J7SA49_CAEEL
biological_process	GO:0045892	negative regulation of transcription, DNA-templated	17	58	0.293103	1	3.663e-08	1	0	TLP1_CAEEL	FLH1_CAEEL	SAEG1_CAEEL	POP1_CAEEL	UNC37_CAEEL	Q9U203_CAEEL	K8F7U3_CAEEL	Q9XVI2_CAEEL	K8ES81_CAEEL	K8ERR8_CAEEL	G5EGU3_CAEEL	G5EBH5_CAEEL	Q9U202_CAEEL	D7SFM3_CAEEL	Q22805_CAEEL	K8ESF3_CAEEL	G5EGP0_CAEEL
biological_process	GO:0010628	positive regulation of gene expression	17	94	0.180851	1	1.98468e-07	1	0	HSF1_CAEEL	LIN29_CAEEL	MEP1_CAEEL	SKN1_CAEEL	SMA9_CAEEL	UNC89_CAEEL	TOR_CAEEL	GLS1_CAEEL	MED23_CAEEL	INSR_CAEEL	LE756_CAEEL	HLH30_CAEEL	GLD3_CAEEL	ATX2_CAEEL	ATFS1_CAEEL	A0A131MCL4_CAEEL	H2L067_CAEEL
cellular_component	GO:0043229	intracellular organelle	17	32	0.53125	1	2.6055e-41	1	0	G5EDD3_CAEEL	A0A2C9C2W9_CAEEL	A0A2C9C3B7_CAEEL	G5EFD1_CAEEL	A0A2C9C2V5_CAEEL	A0A2C9C2G8_CAEEL	G5EFW2_CAEEL	G5ECP9_CAEEL	G5ECG8_CAEEL	G5EFK7_CAEEL	A0A2C9C2V3_CAEEL	G5EFM4_CAEEL	A0A2I2LG13_CAEEL	G5EEC4_CAEEL	A0A2I2LDV7_CAEEL	A0A2C9C332_CAEEL	A0A2C9C2S8_CAEEL
biological_process	GO:0032880	regulation of protein localization	17	56	0.303571	0.999168	0.00179336	1	0.837	WRM1_CAEEL	UNC51_CAEEL	X5LX73_CAEEL	M1ZJY5_CAEEL	X5LX70_CAEEL	X5LPT9_CAEEL	Q9BIC1_CAEEL	X5LV54_CAEEL	A0A2C9C357_CAEEL	Q17740_CAEEL	X5LPU4_CAEEL	X5M5Q5_CAEEL	X5M8U5_CAEEL	X5M8V1_CAEEL	Q86NJ4_CAEEL	X5M5P8_CAEEL	Q86NJ3_CAEEL
biological_process	GO:0030036	actin cytoskeleton organization	17	91	0.186813	1	5.62781e-07	1	0	D0VWL6_CAEEL	A0A4V0IK63_CAEEL	G4S034_CAEEL	Q7JP75_CAEEL	A0A4V0INA2_CAEEL	A0A4V0IN32_CAEEL	A0A0K3AT74_CAEEL	A0A4V0IK09_CAEEL	H2L2C8_CAEEL	Q21408_CAEEL	H2L2C9_CAEEL	H2KYI3_CAEEL	A0A7R9SVK3_CAEEL	A0A4V0IKI4_CAEEL	A0A4V6M3C1_CAEEL	Q23158_CAEEL	Q9XVU8_CAEEL
cellular_component	GO:0005938	cell cortex	16	111	0.144144	0.999999	4.40767e-06	1	0.001	EFA6_CAEEL	NUMB1_CAEEL	MBK2_CAEEL	PAR3_CAEEL	PAR1_CAEEL	WRM1_CAEEL	NLK_CAEEL	SULU_CAEEL	YTE4_CAEEL	APR1_CAEEL	Q9U3A6_CAEEL	Q8I4H0_CAEEL	Q8MQE6_CAEEL	Q8I4G9_CAEEL	A5JYR4_CAEEL	P91857_CAEEL
biological_process	GO:0048856	anatomical structure development	16	215	0.0744186	1	1.98667e-31	1	0	HECD1_CAEEL	NHR1_CAEEL	APTF1_CAEEL	G5ED14_CAEEL	O45494_CAEEL	Q21263_CAEEL	Q21272_CAEEL	X5LPT9_CAEEL	Q9BIC1_CAEEL	Q21039_CAEEL	Q8I4C0_CAEEL	Q20744_CAEEL	Q86NJ4_CAEEL	Q86NJ3_CAEEL	U4PCL3_CAEEL	Q19677_CAEEL
molecular_function	GO:0016887	ATP hydrolysis activity	16	229	0.069869	0.302786	0.75781	1	1	DDX3_CAEEL	MCM5_CAEEL	SSL1_CAEEL	OSM3_CAEEL	DHX15_CAEEL	ZNFX1_CAEEL	A0A3B1E4Z6_CAEEL	G8JY03_CAEEL	Q9N3F4_CAEEL	Q8MQ20_CAEEL	Q7YTG7_CAEEL	P90788_CAEEL	Q20888_CAEEL	Q65XX1_CAEEL	Q18241_CAEEL	Q95XY1_CAEEL
biological_process	GO:0006813	potassium ion transport	16	45	0.355556	0.992762	0.0126735	1	1	SLO1_CAEEL	H7BRC9_CAEEL	G5EDN5_CAEEL	H7BRM5_CAEEL	H7BRM4_CAEEL	G5EE44_CAEEL	H7BRM7_CAEEL	H8ESE5_CAEEL	Q8MQC5_CAEEL	H8ESE2_CAEEL	Q9XWG9_CAEEL	H8ESE4_CAEEL	B7FAS2_CAEEL	H8ESD6_CAEEL	H8ESD8_CAEEL	H8ESE3_CAEEL
molecular_function	GO:0004842	ubiquitin-protein transferase activity	16	64	0.25	0.992475	0.0143993	1	1	LIN41_CAEEL	RN113_CAEEL	HECD1_CAEEL	G5ED20_CAEEL	W6RTE4_CAEEL	V6CL75_CAEEL	Q9GYQ9_CAEEL	W6RRU8_CAEEL	V6CL74_CAEEL	V6CIS4_CAEEL	V6CIS8_CAEEL	V6CJX7_CAEEL	V6CLA7_CAEEL	W6SBC7_CAEEL	Q8WQB0_CAEEL	V6CLC0_CAEEL
biological_process	GO:0007266	Rho protein signal transduction	16	25	0.64	1	7.15764e-07	1	0	PAC1_CAEEL	I1W6S5_CAEEL	G5ED33_CAEEL	G5EFE0_CAEEL	A0A061AKT4_CAEEL	Q7YTG1_CAEEL	A0A061ACP8_CAEEL	S6EZU2_CAEEL	O18250_CAEEL	Q7YTG2_CAEEL	A0A061ADW6_CAEEL	A0A061ACM2_CAEEL	A0A4V0IJW4_CAEEL	A0A4V6M3U0_CAEEL	A0A061AJ42_CAEEL	Q22354_CAEEL
biological_process	GO:0010629	negative regulation of gene expression	15	64	0.234375	1	4.4274e-17	1	0	SEA2_CAEEL	HSF1_CAEEL	LIN41_CAEEL	DDX3_CAEEL	SAM10_CAEEL	SMA9_CAEEL	PQE1_CAEEL	TOR_CAEEL	INSR_CAEEL	ATX2_CAEEL	FOX1_CAEEL	O62020_CAEEL	Q17620_CAEEL	A0A061AL58_CAEEL	Q18241_CAEEL
cellular_component	GO:0000139	Golgi membrane	15	192	0.078125	0.894676	0.156575	1	1	COG8_CAEEL	GOGA5_CAEEL	G5EDE8_CAEEL	Q2EEM5_CAEEL	A0A4V0IKA6_CAEEL	E1B6R8_CAEEL	Q5FC80_CAEEL	Q95ZV3_CAEEL	Q18968_CAEEL	A0A4V0IM30_CAEEL	A0A4V0IKE4_CAEEL	H2KZQ8_CAEEL	G5EGG0_CAEEL	H2KZQ9_CAEEL	Q9TYL9_CAEEL
biological_process	GO:0045214	sarcomere organization	15	33	0.454545	1	1.12186e-09	1	0	SRBS1_CAEEL	DMD_CAEEL	UNC89_CAEEL	SLO1_CAEEL	DYC1_CAEEL	H7BRC9_CAEEL	H7BRM5_CAEEL	H7BRM4_CAEEL	H7BRM7_CAEEL	H8ESE5_CAEEL	H8ESE2_CAEEL	H8ESE4_CAEEL	H8ESD6_CAEEL	H8ESD8_CAEEL	H8ESE3_CAEEL
molecular_function	GO:0005198	structural molecule activity	15	58	0.258621	0.485365	0.587928	1	1	A0A1N7SYR7_CAEEL	G5EEI5_CAEEL	G5EDD3_CAEEL	A0A1N7SYN9_CAEEL	G5EFD1_CAEEL	A0A1N7SYP3_CAEEL	G5EFW2_CAEEL	G5ECP9_CAEEL	G5ECG8_CAEEL	G5EFK7_CAEEL	A0A1N7SYN7_CAEEL	G5EFM4_CAEEL	Q22667_CAEEL	G5EEC4_CAEEL	Q9TYL9_CAEEL
cellular_component	GO:0000932	P-body	15	45	0.333333	1	1.87316e-08	1	0	LARP1_CAEEL	LIN41_CAEEL	PAN3_CAEEL	DCP2_CAEEL	CNOT1_CAEEL	Q20183_CAEEL	Q17740_CAEEL	Q8ITV7_CAEEL	G5EES3_CAEEL	G5EFX8_CAEEL	H2L031_CAEEL	Q27420_CAEEL	G5EGR6_CAEEL	Q9U302_CAEEL	Q8ITV6_CAEEL
cellular_component	GO:0005891	voltage-gated calcium channel complex	15	29	0.517241	1	1.01989e-11	1	0	Q86G45_CAEEL	Q8MPY5_CAEEL	A0A3B1E695_CAEEL	A0A1N7SYU0_CAEEL	A0A1N7SYU6_CAEEL	A0A1N7SYT1_CAEEL	O01661_CAEEL	A0A3B1E4Z9_CAEEL	A0A1N7SYT8_CAEEL	A0A3B1DR32_CAEEL	A0A1N7SYT0_CAEEL	A0A1N7SYV5_CAEEL	A0A1N7SYV7_CAEEL	A0A1N7SYU4_CAEEL	A0A3B1E663_CAEEL
cellular_component	GO:0043025	neuronal cell body	14	215	0.0651163	0.498445	0.603105	1	1	PK1_CAEEL	GLR1_CAEEL	CREC_CAEEL	LIN10_CAEEL	PKD1_CAEEL	OSM3_CAEEL	UNC51_CAEEL	INSR_CAEEL	MACO1_CAEEL	Q10929_CAEEL	Q8MQ20_CAEEL	Q21875_CAEEL	Q20888_CAEEL	C4ALD8_CAEEL
biological_process	GO:0015031	protein transport	14	170	0.0823529	0.808094	0.237287	1	1	COG8_CAEEL	CNT2_CAEEL	NUP98_CAEEL	APR1_CAEEL	Q20913_CAEEL	A0A4V0IKA6_CAEEL	Q9TXN6_CAEEL	Q95QX5_CAEEL	Q95ZV3_CAEEL	A0A4V0IM30_CAEEL	Q2PJ77_CAEEL	A0A4V0IKE4_CAEEL	H2KZQ8_CAEEL	H2KZQ9_CAEEL
cellular_component	GO:0005794	Golgi apparatus	14	192	0.0729167	0.882361	0.158387	1	1	GCC2_CAEEL	GOGA5_CAEEL	PICAL_CAEEL	LIN10_CAEEL	A0A3P6N624_CAEEL	Q9N3Y1_CAEEL	E1B6R8_CAEEL	A0A3P6PAV3_CAEEL	Q9TXN6_CAEEL	A0A3P6PCP8_CAEEL	Q18013_CAEEL	A0A3P6NI91_CAEEL	Q22009_CAEEL	D0Z5P0_CAEEL
biological_process	GO:0006886	intracellular protein transport	14	148	0.0945946	0.652114	0.423486	1	1	RIM_CAEEL	Q9U2D8_CAEEL	A0A5E4LYK9_CAEEL	Q2EEM5_CAEEL	A0A5E4LXW2_CAEEL	Q23368_CAEEL	Q19371_CAEEL	A0A5E4M2M0_CAEEL	A0A5E4LWH4_CAEEL	Q7K711_CAEEL	H1UBJ3_CAEEL	G5EGG0_CAEEL	P91857_CAEEL	Q9TYL9_CAEEL
biological_process	GO:0040027	negative regulation of vulval development	14	62	0.225806	0.999948	0.000201905	1	0.188	LIN13_CAEEL	RING2_CAEEL	MED12_CAEEL	APR1_CAEEL	G5ED20_CAEEL	G5EF87_CAEEL	H8ESF3_CAEEL	H2L0F6_CAEEL	H2L0F5_CAEEL	H8ESF4_CAEEL	Q65CL5_CAEEL	H2L0F7_CAEEL	Q8ITW3_CAEEL	Q18241_CAEEL
molecular_function	GO:0003712	transcription coregulator activity	14	71	0.197183	1	2.19001e-13	1	0	MED10_CAEEL	MED13_CAEEL	CMTA1_CAEEL	GEI17_CAEEL	Q18265_CAEEL	K8F7U3_CAEEL	K8ES81_CAEEL	K8ERR8_CAEEL	G5EGU3_CAEEL	G5EBH5_CAEEL	D7SFM3_CAEEL	K8ESF3_CAEEL	G5EGP0_CAEEL	G5EBG3_CAEEL
biological_process	GO:0050804	modulation of chemical synaptic transmission	14	29	0.482759	0.990798	0.0185867	1	1	SLO1_CAEEL	H7BRC9_CAEEL	H7BRM5_CAEEL	H7BRM4_CAEEL	H7BRM7_CAEEL	H8ESE5_CAEEL	H8ESE2_CAEEL	H8ESE4_CAEEL	V6CLV8_CAEEL	V6CLR8_CAEEL	H8ESD6_CAEEL	V6CJD7_CAEEL	H8ESD8_CAEEL	H8ESE3_CAEEL
biological_process	GO:0006816	calcium ion transport	14	40	0.35	0.992733	0.0157422	1	1	Q86G45_CAEEL	Q8MPY5_CAEEL	A0A3B1E695_CAEEL	A0A1N7SYU0_CAEEL	A0A1N7SYU6_CAEEL	A0A1N7SYT1_CAEEL	A0A3B1E4Z9_CAEEL	A0A1N7SYT8_CAEEL	A0A3B1DR32_CAEEL	A0A1N7SYT0_CAEEL	A0A1N7SYV5_CAEEL	A0A1N7SYV7_CAEEL	A0A1N7SYU4_CAEEL	A0A3B1E663_CAEEL
molecular_function	GO:0005245	voltage-gated calcium channel activity	14	23	0.608696	1	3.28054e-10	1	0	Q86G45_CAEEL	Q8MPY5_CAEEL	A0A3B1E695_CAEEL	A0A1N7SYU0_CAEEL	A0A1N7SYU6_CAEEL	A0A1N7SYT1_CAEEL	A0A3B1E4Z9_CAEEL	A0A1N7SYT8_CAEEL	A0A3B1DR32_CAEEL	A0A1N7SYT0_CAEEL	A0A1N7SYV5_CAEEL	A0A1N7SYV7_CAEEL	A0A1N7SYU4_CAEEL	A0A3B1E663_CAEEL
biological_process	GO:0070509	calcium ion import	14	26	0.538462	0.999995	2.5295e-05	1	0.017	Q86G45_CAEEL	Q8MPY5_CAEEL	A0A3B1E695_CAEEL	A0A1N7SYU0_CAEEL	A0A1N7SYU6_CAEEL	A0A1N7SYT1_CAEEL	A0A3B1E4Z9_CAEEL	A0A1N7SYT8_CAEEL	A0A3B1DR32_CAEEL	A0A1N7SYT0_CAEEL	A0A1N7SYV5_CAEEL	A0A1N7SYV7_CAEEL	A0A1N7SYU4_CAEEL	A0A3B1E663_CAEEL
biological_process	GO:0006468	protein phosphorylation	13	142	0.0915493	0.145467	0.895246	1	1	PK1_CAEEL	MBK2_CAEEL	PAR1_CAEEL	WRM1_CAEEL	TLK1_CAEEL	TOR_CAEEL	NLK_CAEEL	SULU_CAEEL	UNC51_CAEEL	CDK8_CAEEL	Q2XN10_CAEEL	G3MTX3_CAEEL	A0A1T5HUK9_CAEEL
biological_process	GO:0040025	vulval development	13	79	0.164557	0.999999	1.56438e-06	1	0	EGL13_CAEEL	KRAF1_CAEEL	MEP1_CAEEL	SIN3_CAEEL	PAR1_CAEEL	APR1_CAEEL	GLD3_CAEEL	G5ED14_CAEEL	H2KZM4_CAEEL	G5EES3_CAEEL	Q7Z1Q1_CAEEL	Q9XU67_CAEEL	G5EGR6_CAEEL
biological_process	GO:0048598	embryonic morphogenesis	13	51	0.254902	1	1.1743e-07	1	0	PK1_CAEEL	PPN1_CAEEL	MRCK_CAEEL	APR1_CAEEL	G5ED33_CAEEL	G5EFE0_CAEEL	Q7YTG1_CAEEL	Q8I103_CAEEL	H1UBL0_CAEEL	O18250_CAEEL	Q7YTG2_CAEEL	Q56VX4_CAEEL	H1UBK9_CAEEL
biological_process	GO:0008406	gonad development	13	72	0.180556	0.999987	3.83417e-05	1	0.037	DRE1_CAEEL	MEP1_CAEEL	PAR3_CAEEL	TRA1_CAEEL	TEN1_CAEEL	G5EF53_CAEEL	G5EEY5_CAEEL	H1ZUX0_CAEEL	Q9XVI2_CAEEL	H1ZUX1_CAEEL	Q9XU67_CAEEL	J7SA49_CAEEL	Q95ZN3_CAEEL
cellular_component	GO:0005789	endoplasmic reticulum membrane	13	224	0.0580357	0.105705	0.932432	1	1	DNJ1_CAEEL	MYRF1_CAEEL	G5EDE8_CAEEL	G5EGT1_CAEEL	Q20913_CAEEL	Q23368_CAEEL	Q19371_CAEEL	Q5FC80_CAEEL	Q9GRZ9_CAEEL	Q18968_CAEEL	Q22667_CAEEL	Q9U2L4_CAEEL	Q2PJ77_CAEEL
molecular_function	GO:0003714	transcription corepressor activity	13	55	0.236364	0.999986	6.58804e-05	1	0.027	SIN3_CAEEL	SAEG1_CAEEL	SMA9_CAEEL	EGL27_CAEEL	POP1_CAEEL	UNC37_CAEEL	HDA4_CAEEL	A0A168H9W7_CAEEL	Q86S28_CAEEL	Q86G95_CAEEL	O61907_CAEEL	Q20237_CAEEL	Q76NP4_CAEEL
cellular_component	GO:0016324	apical plasma membrane	13	94	0.138298	0.999248	0.00218558	1	0.43	VATE_CAEEL	MTMR6_CAEEL	PAR3_CAEEL	YTE4_CAEEL	G5EBF2_CAEEL	G5EDD3_CAEEL	G5EFD1_CAEEL	G5EFW2_CAEEL	G5ECP9_CAEEL	G5ECG8_CAEEL	G5EFK7_CAEEL	G5EFM4_CAEEL	G5EEC4_CAEEL
cellular_component	GO:0005730	nucleolus	13	162	0.0802469	0.811687	0.275036	1	1	SZY20_CAEEL	XRN2_CAEEL	LE756_CAEEL	ADR1_CAEEL	O61980_CAEEL	D2KT99_CAEEL	B2D6L4_CAEEL	Q565A8_CAEEL	O62214_CAEEL	A0A061AJ27_CAEEL	Q2EEN1_CAEEL	Q9XUE3_CAEEL	Q9XU67_CAEEL
cellular_component	GO:0000785	chromatin	13	74	0.175676	1	2.80803e-18	1	0	LE607_CAEEL	MED10_CAEEL	HSF1_CAEEL	LIN59_CAEEL	SIN3_CAEEL	TBPL1_CAEEL	TLK1_CAEEL	ZFP1_CAEEL	BAZ2_CAEEL	GEI17_CAEEL	G5ED20_CAEEL	Q2XN10_CAEEL	G3MTX3_CAEEL
molecular_function	GO:0008017	microtubule binding	13	109	0.119266	0.987238	0.0271839	1	1	CREC_CAEEL	OSM3_CAEEL	APR1_CAEEL	MACO1_CAEEL	G5EDY8_CAEEL	A0A1N7SYR7_CAEEL	G5EDD3_CAEEL	A0A1N7SYN9_CAEEL	A0A1N7SYP3_CAEEL	Q8MQ20_CAEEL	Q8WQC9_CAEEL	A0A1N7SYN7_CAEEL	Q20888_CAEEL
biological_process	GO:0007399	nervous system development	13	62	0.209677	1	4.50773e-07	1	0	TLP1_CAEEL	LIN10_CAEEL	SYD1_CAEEL	UN119_CAEEL	APR1_CAEEL	FOX1_CAEEL	G5EEW7_CAEEL	K8ERX1_CAEEL	Q86G94_CAEEL	Q21605_CAEEL	M1ZJT7_CAEEL	Q6A582_CAEEL	K8FE02_CAEEL
biological_process	GO:0040017	positive regulation of locomotion	13	98	0.132653	0.930738	0.111427	1	1	DMD_CAEEL	UNC89_CAEEL	UN112_CAEEL	DYC1_CAEEL	G5EEI5_CAEEL	Q9U3A6_CAEEL	G5ECI9_CAEEL	O01661_CAEEL	Q8I4H0_CAEEL	Q8I4G9_CAEEL	Q21875_CAEEL	A0A1T5HUZ1_CAEEL	A5JYR4_CAEEL
biological_process	GO:0031122	cytoplasmic microtubule organization	13	31	0.419355	1	2.35448e-07	1	0	PTRN1_CAEEL	A0A1N7SYR7_CAEEL	G5EDD3_CAEEL	A0A1N7SYN9_CAEEL	G5EFD1_CAEEL	A0A1N7SYP3_CAEEL	G5EFW2_CAEEL	G5ECP9_CAEEL	G5ECG8_CAEEL	G5EFK7_CAEEL	A0A1N7SYN7_CAEEL	G5EFM4_CAEEL	G5EEC4_CAEEL
cellular_component	GO:0008076	voltage-gated potassium channel complex	13	47	0.276596	1	1.87468e-06	1	0	G5EDN5_CAEEL	G5EE44_CAEEL	J3K003_CAEEL	Q18351_CAEEL	Q8MQC5_CAEEL	D5MCS0_CAEEL	Q9XWG9_CAEEL	D9N131_CAEEL	A7UQ08_CAEEL	B7FAS2_CAEEL	H9G2X0_CAEEL	D9N132_CAEEL	D9N133_CAEEL
molecular_function	GO:0005251	delayed rectifier potassium channel activity	13	43	0.302326	0.999999	3.5817e-06	1	0.002	G5EDN5_CAEEL	G5EE44_CAEEL	J3K003_CAEEL	Q18351_CAEEL	Q8MQC5_CAEEL	D5MCS0_CAEEL	Q9XWG9_CAEEL	D9N131_CAEEL	A7UQ08_CAEEL	B7FAS2_CAEEL	H9G2X0_CAEEL	D9N132_CAEEL	D9N133_CAEEL
cellular_component	GO:0005739	mitochondrion	12	563	0.0213144	7.99512e-09	1	0	1	RT10_CAEEL	SKN1_CAEEL	WBS14_CAEEL	TFG_CAEEL	AKAP1_CAEEL	G5EDY8_CAEEL	A0A2K5ATU5_CAEEL	Q8WQC9_CAEEL	G5EDJ9_CAEEL	A0A2K5ATU1_CAEEL	A0A2K5ATV3_CAEEL	U4PRW7_CAEEL
molecular_function	GO:0019901	protein kinase binding	12	98	0.122449	0.985762	0.0279006	1	1	WRM1_CAEEL	YAP1_CAEEL	POP1_CAEEL	MYSP_CAEEL	INSR_CAEEL	LE756_CAEEL	Q10929_CAEEL	H2FLM3_CAEEL	A0A1T5HUK9_CAEEL	H2FLM1_CAEEL	H2FLM2_CAEEL	G5EFJ7_CAEEL
biological_process	GO:0030968	endoplasmic reticulum unfolded protein response	12	56	0.214286	0.999832	0.000613337	1	0.487	G5EGB7_CAEEL	P91419_CAEEL	O16511_CAEEL	Q9NF70_CAEEL	O16501_CAEEL	O16500_CAEEL	Q20002_CAEEL	Q19594_CAEEL	Q93559_CAEEL	O16502_CAEEL	Q86S74_CAEEL	Q17400_CAEEL
cellular_component	GO:0016607	nuclear speck	12	35	0.342857	1	3.53732e-07	1	0	RNP1_CAEEL	SOR1_CAEEL	SYDN_CAEEL	SYD9_CAEEL	WDR33_CAEEL	LE756_CAEEL	G5EE68_CAEEL	A0A061AJ27_CAEEL	Q20084_CAEEL	G5EDE4_CAEEL	O45577_CAEEL	Q9XU67_CAEEL
cellular_component	GO:0043005	neuron projection	12	320	0.0375	0.382897	0.678853	1	1	LGC4_CAEEL	LIPA_CAEEL	GLR1_CAEEL	LIN10_CAEEL	SYD1_CAEEL	OSM3_CAEEL	SYB1_CAEEL	UNC51_CAEEL	ACC3_CAEEL	Q9XVQ0_CAEEL	Q9N3C7_CAEEL	Q22354_CAEEL
molecular_function	GO:0004402	histone acetyltransferase activity	12	27	0.444444	1	9.22872e-07	1	0	CBP1_CAEEL	TAF1_CAEEL	Q7JMS5_CAEEL	K8F7U3_CAEEL	K8ES81_CAEEL	K8ERR8_CAEEL	G5EGU3_CAEEL	G5EBH5_CAEEL	D7SFM3_CAEEL	K8ESF3_CAEEL	G5EGP0_CAEEL	G5EBG3_CAEEL
biological_process	GO:0016042	lipid catabolic process	12	74	0.162162	0.352281	0.742715	1	1	G5EGT1_CAEEL	A0A0K3AXI3_CAEEL	A0A0K3AUL7_CAEEL	A0A0K3ARR7_CAEEL	A0A0K3AUN1_CAEEL	A0A0K3AV92_CAEEL	A0A0K3AVA5_CAEEL	A0A0K3ARQ7_CAEEL	A0A0K3AS90_CAEEL	A0A0K3AS71_CAEEL	A0A0K3AS80_CAEEL	A0A0K3AXJ6_CAEEL
biological_process	GO:0009410	response to xenobiotic stimulus	12	38	0.315789	0.992381	0.0185864	1	1	SLO1_CAEEL	H7BRC9_CAEEL	H7BRM5_CAEEL	H7BRM4_CAEEL	H7BRM7_CAEEL	H8ESE5_CAEEL	H8ESE2_CAEEL	G5ECI9_CAEEL	H8ESE4_CAEEL	H8ESD6_CAEEL	H8ESD8_CAEEL	H8ESE3_CAEEL
biological_process	GO:0035023	regulation of Rho protein signal transduction	12	19	0.631579	0.999999	8.75618e-06	1	0.004	G5ED33_CAEEL	G5EFE0_CAEEL	A0A061AKT4_CAEEL	Q7YTG1_CAEEL	A0A061ACP8_CAEEL	O18250_CAEEL	Q7YTG2_CAEEL	A0A061ADW6_CAEEL	A0A061ACM2_CAEEL	A0A4V0IJW4_CAEEL	A0A4V6M3U0_CAEEL	A0A061AJ42_CAEEL
biological_process	GO:0045104	intermediate filament cytoskeleton organization	12	14	0.857143	1	9.02349e-17	1	0	A0A1N7SYR7_CAEEL	G5EDD3_CAEEL	A0A1N7SYN9_CAEEL	G5EFD1_CAEEL	A0A1N7SYP3_CAEEL	G5EFW2_CAEEL	G5ECP9_CAEEL	G5ECG8_CAEEL	G5EFK7_CAEEL	A0A1N7SYN7_CAEEL	G5EFM4_CAEEL	G5EEC4_CAEEL
biological_process	GO:0042060	wound healing	12	14	0.857143	1	3.36969e-09	1	0	A0A1N7SYR7_CAEEL	G5EDD3_CAEEL	A0A1N7SYN9_CAEEL	G5EFD1_CAEEL	A0A1N7SYP3_CAEEL	G5EFW2_CAEEL	G5ECP9_CAEEL	G5ECG8_CAEEL	G5EFK7_CAEEL	A0A1N7SYN7_CAEEL	G5EFM4_CAEEL	G5EEC4_CAEEL
biological_process	GO:0007276	gamete generation	11	29	0.37931	0.993083	0.0115646	1	1	LIN41_CAEEL	DDX3_CAEEL	IMA3_CAEEL	PGL1_CAEEL	TEN1_CAEEL	H1ZUX0_CAEEL	Q9N3F4_CAEEL	Q304E5_CAEEL	H1ZUX1_CAEEL	Q65XX1_CAEEL	Q95XY1_CAEEL
[truncated: 6,692 more rows]
[truncated: 251 more columns]

## Sheet: polyQ⁄N
GO domain	GO ID	GO term	polyQ⁄N protein	total number	number / total	raw p-value under-representation	raw p-value over-representation	FWER under-representation	FWER over-representation	Gene Name
[truncated: 6,816 more rows]
[truncated: 913 more columns]

[truncated: 19 more sheets: polyN, polyY, polyW, polyC, polyP, polyA, polyS, polyT, polyD, polyE, polyG, polyF, polyH, polyI, polyL, polyV, polyM, polyR, polyK]
