# Supplementary material for: Noncanonical usage of stop codons in ciliates expands proteins with Q-rich motifs
Source: bioRxiv preprint, doi:10.1101/2020.12.08.407247, version 3 (2023-11-13)
Supplement: Dataset DS28 [file 407247_file42.xlsx]

## Sheet: SCD
GO domain	GO ID	GO term	SCD protein	total number	number / total	raw p-value under-representation	raw p-value over-representation	FWER under-representation	FWER over-representation	Gene Name
cellular_component	GO:0005634	nucleus	2070	7130	0.290323	1	7.87491e-78	1	0	LENG8_DANRE	MCA3B_DANRE	PHC2_DANRE	PIWL2_DANRE	PLK4_DANRE	NEPRO_DANRE	STB1A_DANRE	SUV3_DANRE	MDM1_DANRE	PIHD1_DANRE	PO3F1_DANRE	MDM2_DANRE	TMUB1_DANRE	RUVB2_DANRE	NCBP3_DANRE	SMG1_DANRE	TICRR_DANRE	TRRAP_DANRE	SMR8B_DANRE	SMAL1_DANRE	PO3F2_DANRE	SSUH2_DANRE	HPF1_DANRE	LSMD1_DANRE	LRWD1_DANRE	M1I1A_DANRE	DLX5A_DANRE	HSF4_DANRE	KFA_DANRE	MMS19_DANRE	CCDB1_DANRE	JMY_DANRE	KEP1B_DANRE	GLYR1_DANRE	KD5BB_DANRE	DLX2A_DANRE	FUMH_DANRE	HMX3_DANRE	HN1BB_DANRE	HN1BA_DANRE
cellular_component	GO:0005737	cytoplasm	1614	6664	0.242197	0.129451	0.876045	1	1	INVS_DANRE	MCA3B_DANRE	PIWL2_DANRE	PLK4_DANRE	MDM1_DANRE	PIHD1_DANRE	RBM44_DANRE	TAF8_DANRE	MDM2_DANRE	TMUB1_DANRE	NCBP3_DANRE	SETD3_DANRE	SMR8B_DANRE	SAS6_DANRE	SSUH2_DANRE	STIL_DANRE	LSMD1_DANRE	LRWD1_DANRE	DACT1_DANRE	FCHO1_DANRE	KFA_DANRE	MMS19_DANRE	KIZ_DANRE	KIF7_DANRE	CCDB1_DANRE	ANKS6_DANRE	JMY_DANRE	KEP1B_DANRE	BSDC1_DANRE	HYKK_DANRE	ILF3_DANRE	GTPB3_DANRE	DAPLE_DANRE	MTA70_DANRE	CP135_DANRE	EGR1_DANRE	EYS_DANRE	MIB1_DANRE	KIF22_DANRE	NUSAP_DANRE
cellular_component	GO:0016021	integral component of membrane	1310	8526	0.153648	2.49287e-82	1	0	1	PCX4_DANRE	RN145_DANRE	NCLN_DANRE	TMUB1_DANRE	TIDC1_DANRE	H6ST2_DANRE	CR19A_DANRE	GXLT1_DANRE	I17RD_DANRE	L1CA2_DANRE	LMD2B_DANRE	GP161_DANRE	K1109_DANRE	ARAID_DANRE	MNAR1_DANRE	HEG_DANRE	GOGA5_DANRE	DISP2_DANRE	APH1B_DANRE	COL12_DANRE	GRB1L_DANRE	KDISB_DANRE	POMT2_DANRE	CR3LA_DANRE	NR3BA_DANRE	COQ8A_DANRE	GLMP_DANRE	PMGT2_DANRE	PRTGB_DANRE	COQ8B_DANRE	MFD6A_DANRE	NRP1A_DANRE	PTC1_DANRE	NR1AA_DANRE	PEX16_DANRE	MFSD5_DANRE	PTSS1_DANRE	OSTA_DANRE	CR3LB_DANRE	S39AD_DANRE
biological_process	GO:0006357	regulation of transcription by RNA polymerase II	1075	2935	0.366269	1	4.50951e-70	1	0	PHF2_DANRE	PHF8_DANRE	PO3F1_DANRE	MDM2_DANRE	RUVB2_DANRE	SMAL1_DANRE	PO3F2_DANRE	DLX5A_DANRE	HSF4_DANRE	AEBP2_DANRE	JMY_DANRE	DLX2A_DANRE	HMX3_DANRE	HN1BB_DANRE	HN1BA_DANRE	NPS4L_DANRE	EGR1_DANRE	LIN9_DANRE	DLX2B_DANRE	HIC2_DANRE	NRF1_DANRE	EMX1_DANRE	KLF1_DANRE	ARI5B_DANRE	ARNT2_DANRE	FX1AA_DANRE	FXC1B_DANRE	BSH_DANRE	CR3LA_DANRE	DLX6A_DANRE	MINY1_DANRE	KTI12_DANRE	DLX4A_DANRE	MYNN_DANRE	NPS4A_DANRE	PAX6_DANRE	ETV4_DANRE	MED29_DANRE	PO5F1_DANRE	REST_DANRE
molecular_function	GO:0000981	DNA-binding transcription factor activity, RNA polymerase II-specific	1059	2546	0.415947	1	4.11197e-114	1	0	PO3F1_DANRE	PO3F2_DANRE	DLX5A_DANRE	DLX2A_DANRE	HMX3_DANRE	HN1BB_DANRE	HN1BA_DANRE	NPS4L_DANRE	EGR1_DANRE	DLX2B_DANRE	HIC2_DANRE	FOXN4_DANRE	NRF1_DANRE	EMX1_DANRE	KLF1_DANRE	ARNT2_DANRE	FX1AA_DANRE	FXC1B_DANRE	BSH_DANRE	CR3LA_DANRE	DLX6A_DANRE	MINY1_DANRE	DLX4A_DANRE	NPS4A_DANRE	PAX6_DANRE	ETV4_DANRE	PO5F1_DANRE	REST_DANRE	NKX11_DANRE	CR3LB_DANRE	PO4F3_DANRE	PNX_DANRE	RFX2_DANRE	SKR1B_DANRE	SOX2_DANRE	P3F3A_DANRE	RFX4_DANRE	OTX2_DANRE	RFX6_DANRE	TBX6L_DANRE
molecular_function	GO:0000978	RNA polymerase II cis-regulatory region sequence-specific DNA binding	946	2166	0.43675	1	1.19933e-116	1	0	PO3F1_DANRE	PO3F2_DANRE	DLX5A_DANRE	HSF4_DANRE	DLX2A_DANRE	HN1BB_DANRE	HN1BA_DANRE	EGR1_DANRE	DLX2B_DANRE	HIC2_DANRE	NRF1_DANRE	EMX1_DANRE	KLF1_DANRE	ARNT2_DANRE	FX1AA_DANRE	FXC1B_DANRE	BSH_DANRE	CR3LA_DANRE	DLX6A_DANRE	MINY1_DANRE	DLX4A_DANRE	MYNN_DANRE	NPS4A_DANRE	PAX6_DANRE	PO5F1_DANRE	NKX11_DANRE	CR3LB_DANRE	PO4F3_DANRE	PNX_DANRE	RFX2_DANRE	SKR1B_DANRE	SOX2_DANRE	P3F3A_DANRE	RFX4_DANRE	OTX2_DANRE	RFX6_DANRE	TBX6L_DANRE	SOX1A_DANRE	SP9_DANRE	SRBP2_DANRE
molecular_function	GO:0005524	ATP binding	793	3312	0.239432	0.991134	0.00996241	1	1	PLK4_DANRE	SUV3_DANRE	P4K2B_DANRE	RUVB2_DANRE	SMG1_DANRE	SMAL1_DANRE	DDX55_DANRE	KIF7_DANRE	ERCC3_DANRE	JAK1_DANRE	KIF22_DANRE	CLP1_DANRE	ERC6L_DANRE	DDX51_DANRE	COQ8A_DANRE	MTU1_DANRE	KTI12_DANRE	COQ8B_DANRE	EPB4A_DANRE	FGR1A_DANRE	FIGN_DANRE	P4K2A_DANRE	SIK3_DANRE	PI4KB_DANRE	SAE2_DANRE	RIR1_DANRE	SPEG_DANRE	MYLK3_DANRE	TTLL6_DANRE	TYRO3_DANRE	PAL1A_DANRE	TIE2_DANRE	TRIO_DANRE	VGFR3_DANRE	STPAP_DANRE	TDRD9_DANRE	TLK2_DANRE	RENT1_DANRE	DICER_DANRE	ARP8_DANRE
cellular_component	GO:0005886	plasma membrane	744	3616	0.205752	1.71905e-10	1	0	1	P4K2B_DANRE	NCLN_DANRE	DLGP1_DANRE	FCHO1_DANRE	L1CA2_DANRE	LMD2B_DANRE	ARAID_DANRE	MNAR1_DANRE	MIB1_DANRE	HEG_DANRE	CAPR2_DANRE	CNTN5_DANRE	GPR22_DANRE	MELT_DANRE	COQ8B_DANRE	COBL_DANRE	FGR1A_DANRE	MFD6A_DANRE	PTC1_DANRE	MFSD5_DANRE	OSTA_DANRE	S39AE_DANRE	S12A9_DANRE	P4K2A_DANRE	SMUF2_DANRE	P3IP1_DANRE	NOTC1_DANRE	SWET1_DANRE	SCRIB_DANRE	S29A4_DANRE	RGRF2_DANRE	NKD2_DANRE	S47A1_DANRE	NKD2L_DANRE	THS7A_DANRE	TEN4_DANRE	TM116_DANRE	NSMF_DANRE	NKD1_DANRE	TA13C_DANRE
molecular_function	GO:0046872	metal ion binding	663	2590	0.255985	0.992361	0.00837933	1	1	MCA3B_DANRE	PHF8_DANRE	PIWL2_DANRE	MDM2_DANRE	TPP1_DANRE	SH3R1_DANRE	RN152_DANRE	AEBP2_DANRE	KD5BB_DANRE	EXT1A_DANRE	JAK1_DANRE	CRA1B_DANRE	HIC2_DANRE	ARMT1_DANRE	CRBN_DANRE	CAPR2_DANRE	EXO1_DANRE	KLF1_DANRE	COL12_DANRE	EXT1B_DANRE	EXT1C_DANRE	NSE1_DANRE	NR3BA_DANRE	MCA3A_DANRE	MICA1_DANRE	BRF2_DANRE	NRP1A_DANRE	MYNN_DANRE	NR1AA_DANRE	REST_DANRE	PRD10_DANRE	NUP42_DANRE	RPAP2_DANRE	RFNG_DANRE	SAE2_DANRE	SOBPB_DANRE	SMYD5_DANRE	TIM8A_DANRE	SP9_DANRE	TTLL6_DANRE
biological_process	GO:0035556	intracellular signal transduction	521	1563	0.333333	1	4.06837e-16	1	0	JAK1_DANRE	DNMBP_DANRE	SIK3_DANRE	RHG29_DANRE	TLK2_DANRE	MY9AB_DANRE	Q1RLV6_DANRE	B0EVP9_DANRE	Q0H1F2_DANRE	E7F7I3_DANRE	A0A2R8RIR1_DANRE	F1Q6A2_DANRE	A0A2R8Q2X0_DANRE	A0JML4_DANRE	B0S6F4_DANRE	A0A0R4IGN6_DANRE	F1R801_DANRE	Q6DHN7_DANRE	A0A0R4IFZ8_DANRE	A0A2R8QIB0_DANRE	E9QHI3_DANRE	B2KTE1_DANRE	A9ZMG5_DANRE	A0A2R8RR89_DANRE	B2KTE4_DANRE	A0A2R8Q6P2_DANRE	B0V360_DANRE	A0A0R4IEK8_DANRE	X1WGA8_DANRE	A2RUX1_DANRE	Q803M9_DANRE	A0A2R8RZ99_DANRE	X1WG08_DANRE	A0A0R4IS51_DANRE	A0A2R8QR46_DANRE	B0S8I4_DANRE	Q6NWY2_DANRE	D2CFN3_DANRE	Q38JL1_DANRE	B0EVP5_DANRE
biological_process	GO:0006355	regulation of transcription, DNA-templated	434	824	0.526699	1	5.69598e-133	1	0	TRRAP_DANRE	SPT2_DANRE	NPS4L_DANRE	MCAF1_DANRE	FOXN4_DANRE	BRDT_DANRE	ARNT2_DANRE	BRD4_DANRE	ETV4_DANRE	SOX2_DANRE	NOTC1_DANRE	NFIL3_DANRE	SOX1A_DANRE	TBX5A_DANRE	TE2IP_DANRE	ZN219_DANRE	UBP13_DANRE	ZN423_DANRE	NCOA2_DANRE	ARP8_DANRE	LIN54_DANRE	EMSY_DANRE	A0A0N4SUE5_DANRE	E9QDP0_DANRE	Q98TU2_DANRE	C7DZJ6_DANRE	Q1L941_DANRE	Q6NYI3_DANRE	A5JNG8_DANRE	Q6P2A9_DANRE	A3KQ64_DANRE	B5DE32_DANRE	Q6P0F1_DANRE	B3DGV3_DANRE	B3DG00_DANRE	A4QN63_DANRE	Q30JB6_DANRE	A0A0R4IU34_DANRE	F1QIE7_DANRE	F1QAV3_DANRE
molecular_function	GO:0003677	DNA binding	383	1124	0.340747	1	2.58463e-141	1	0	PHC2_DANRE	STB1A_DANRE	SUV3_DANRE	SPT6H_DANRE	SPT2_DANRE	AEBP2_DANRE	ILF3_DANRE	KD5BB_DANRE	ERCC3_DANRE	HN1BA_DANRE	LIN9_DANRE	KIF22_DANRE	NUSAP_DANRE	EXO1_DANRE	ERC6L_DANRE	ARI3A_DANRE	PRD10_DANRE	NFIL3_DANRE	SPT5H_DANRE	PARI_DANRE	ZN703_DANRE	STB1B_DANRE	Z687A_DANRE	TBPL2_DANRE	TBXTA_DANRE	ZFR_DANRE	ZN326_DANRE	PAX2A_DANRE	RENT1_DANRE	HXA3A_DANRE	CHD8_DANRE	MYCA_DANRE	MYSM1_DANRE	LIN54_DANRE	JARD2_DANRE	E2F8_DANRE	BANP_DANRE	DDX20_DANRE	DDX11_DANRE	A3KQW9_DANRE
cellular_component	GO:0005829	cytosol	366	1746	0.209622	0.00697954	0.994061	0.795	1	TAB2_DANRE	RUN3A_DANRE	SC23A_DANRE	SNX17_DANRE	M1I1A_DANRE	KFA_DANRE	FUMH_DANRE	CTU2_DANRE	BAG6_DANRE	CEP89_DANRE	FA83D_DANRE	KLF1_DANRE	GGYF2_DANRE	CHM2B_DANRE	BECN1_DANRE	ELP5_DANRE	BTB6A_DANRE	COG4_DANRE	COQ8B_DANRE	COBL_DANRE	FGR1A_DANRE	PSM4A_DANRE	RNF8_DANRE	PABPA_DANRE	PKHA8_DANRE	SHP2A_DANRE	TELO2_DANRE	YTHD2_DANRE	MIDN_DANRE	SPAG1_DANRE	WDR81_DANRE	UFL1_DANRE	MYLIB_DANRE	UBP13_DANRE	XPO2_DANRE	WDR73_DANRE	PSM4B_DANRE	RIC1_DANRE	TBC8B_DANRE	UBP37_DANRE
molecular_function	GO:0008270	zinc ion binding	356	1502	0.237017	0.910179	0.100404	1	1	PHF2_DANRE	PHC2_DANRE	STB1A_DANRE	RN145_DANRE	TAB2_DANRE	SC23A_DANRE	EGR1_DANRE	MIB1_DANRE	RNF8_DANRE	UBP33_DANRE	STB1B_DANRE	UBP16_DANRE	UBP13_DANRE	STPAP_DANRE	TRAF6_DANRE	ZN346_DANRE	ZFR_DANRE	UBR3_DANRE	RENT1_DANRE	N2F1A_DANRE	KCMF1_DANRE	D2HDH_DANRE	Q6AZ98_DANRE	Q499A8_DANRE	Q91430_DANRE	Q6IQH8_DANRE	Q9W6U0_DANRE	F1QJN9_DANRE	B3DKN2_DANRE	E7F123_DANRE	Q1L8B2_DANRE	A0A0A0MPJ3_DANRE	Q6PH53_DANRE	F1Q546_DANRE	E7F2D0_DANRE	Q800H6_DANRE	F6NXU9_DANRE	X1WBW4_DANRE	B3DGQ7_DANRE	A2CJ02_DANRE
cellular_component	GO:0005887	integral component of plasma membrane	343	2019	0.169886	5.35232e-08	1	0	1	PLXA3_DANRE	RHBG_DANRE	SCAR5_DANRE	SE3AB_DANRE	TSN36_DANRE	SEM4E_DANRE	SE3AA_DANRE	LGR6_DANRE	JAM2A_DANRE	CEIP2_DANRE	GPR22_DANRE	EPB4A_DANRE	FGR1A_DANRE	OP1S2_DANRE	S39AE_DANRE	P4K2A_DANRE	S5A3B_DANRE	TYRO3_DANRE	TEN3_DANRE	TIE2_DANRE	VGFR3_DANRE	AGRG6_DANRE	B6RTA2_DANRE	F1Q5F4_DANRE	E7FB36_DANRE	F1QNK9_DANRE	Q53CM6_DANRE	B3DHL7_DANRE	S5UFP7_DANRE	F1Q5N3_DANRE	A1L1T5_DANRE	A0A142J9E8_DANRE	Q0PJT8_DANRE	E7EEJ8_DANRE	F8W634_DANRE	A0FJH8_DANRE	F1R5S1_DANRE	A3KNU7_DANRE	E9QC71_DANRE	F1Q8X9_DANRE
molecular_function	GO:0005509	calcium ion binding	322	1376	0.234012	0.844875	0.171249	1	1	PEF1_DANRE	EYS_DANRE	MIRO1_DANRE	HEG_DANRE	CEIP2_DANRE	NOTC1_DANRE	NKD2_DANRE	NKD2L_DANRE	RFP4A_DANRE	RFIP3_DANRE	TSP4B_DANRE	TBC8B_DANRE	NKD1_DANRE	DLLC_DANRE	JAG1A_DANRE	A2ARH3_DANRE	F1RD80_DANRE	X1WCY4_DANRE	Q6EF99_DANRE	X1WG80_DANRE	F1QY34_DANRE	E7FDQ5_DANRE	B3DFM3_DANRE	Q6IQF6_DANRE	Q1LUV5_DANRE	F1QBZ9_DANRE	B3DH26_DANRE	F1QFX6_DANRE	Q1L9A0_DANRE	A0A0R4IS51_DANRE	A0A2R8Q5S4_DANRE	A9C3V5_DANRE	E7F2U9_DANRE	Q8AX99_DANRE	Q6EFA0_DANRE	F1RBW3_DANRE	Q1L927_DANRE	Q5WQV6_DANRE	X1WDW2_DANRE	Q7ZZT0_DANRE
cellular_component	GO:0016020	membrane	321	1341	0.239374	1.06565e-53	1	0	1	PLXA3_DANRE	MPP7_DANRE	TAB2_DANRE	C27C1_DANRE	LMD2B_DANRE	JAK1_DANRE	MXB_DANRE	GGYF2_DANRE	BBS2_DANRE	MFD6A_DANRE	MXA_DANRE	PI4KB_DANRE	PKHA8_DANRE	SHP2A_DANRE	SCRIB_DANRE	TELO2_DANRE	MXE_DANRE	S47A1_DANRE	TEN3_DANRE	TEN4_DANRE	TGFA1_DANRE	NBEL2_DANRE	MFD6B_DANRE	DCTN2_DANRE	E7F4Q7_DANRE	E7F020_DANRE	A0A286YAC4_DANRE	A9JRB4_DANRE	F2Z4T4_DANRE	A0A0R4IG72_DANRE	F1Q6A2_DANRE	A8WG10_DANRE	E7FBN6_DANRE	X1WEU3_DANRE	A0A2R8RN23_DANRE	B2KTE1_DANRE	F1QCU4_DANRE	Q6TNS1_DANRE	A0A286Y9S9_DANRE	F1QN33_DANRE
cellular_component	GO:0005615	extracellular space	240	1698	0.141343	5.46158e-18	1	0	1	SE3AB_DANRE	SEM4E_DANRE	SE3AA_DANRE	APOEB_DANRE	CRA1B_DANRE	COL12_DANRE	KERA_DANRE	WNT5B_DANRE	TSP4B_DANRE	IBP2B_DANRE	NBL1_DANRE	NTF7_DANRE	F1QJN9_DANRE	B3DLK0_DANRE	Q6EF99_DANRE	Q1LWR7_DANRE	A2BF64_DANRE	A9ZPD8_DANRE	A9JRD6_DANRE	E5DV48_DANRE	Q6NZ01_DANRE	A9JRH0_DANRE	Q6DG79_DANRE	E7FA40_DANRE	A7MCD1_DANRE	A8E7F4_DANRE	Q6NYT8_DANRE	Q1LUV5_DANRE	Q8JH29_DANRE	Q7T309_DANRE	Q6GMG0_DANRE	E7F898_DANRE	Q1LYP1_DANRE	A8BBJ2_DANRE	A0A2R8Q0D8_DANRE	Q6DGL1_DANRE	D3GE88_DANRE	B0S6K6_DANRE	F1R9Z0_DANRE	Q7SX66_DANRE
biological_process	GO:0007165	signal transduction	239	919	0.260065	1	4.37581e-07	1	0.001	SNX17_DANRE	RH42A_DANRE	FA83D_DANRE	ARNT2_DANRE	FA83H_DANRE	PLCX3_DANRE	TEN3_DANRE	TEN4_DANRE	HSH2D_DANRE	NDRG2_DANRE	GKAP1_DANRE	E7F4Q7_DANRE	Q0II00_DANRE	E7F7Y0_DANRE	B7ZVK8_DANRE	A0A0R4IKK1_DANRE	E7F123_DANRE	A0A0R4IG34_DANRE	E7F9H1_DANRE	Q0PJT8_DANRE	F1R372_DANRE	Q568M9_DANRE	F1Q8C7_DANRE	B0S8J8_DANRE	F1QV08_DANRE	Q0VG64_DANRE	F1QBJ1_DANRE	B0R0R1_DANRE	Q7ZUQ2_DANRE	A0A2R8Q360_DANRE	F1QFY0_DANRE	Q5TZG7_DANRE	A0A2R8QP15_DANRE	F1QV17_DANRE	A0A0R4IEP8_DANRE	A0A0R4IHI1_DANRE	A0A2R8RW91_DANRE	A0A2R8RHW5_DANRE	A0A2R8QF27_DANRE	A0A2R8Q8D8_DANRE
molecular_function	GO:0003723	RNA binding	237	993	0.238671	0.837517	0.176828	1	1	RBM44_DANRE	DDX55_DANRE	GPKOW_DANRE	CAPR2_DANRE	DDX51_DANRE	MRM3A_DANRE	PYM1_DANRE	MRM3B_DANRE	PABPA_DANRE	RBM48_DANRE	SE1BA_DANRE	TDRD3_DANRE	PATL1_DANRE	STPAP_DANRE	TDRD9_DANRE	RENT1_DANRE	CELF1_DANRE	CELF2_DANRE	DICER_DANRE	EIF3D_DANRE	DDX20_DANRE	DDX11_DANRE	DI3L1_DANRE	ELAV4_DANRE	A0A2R8RSV0_DANRE	A5WVQ1_DANRE	F1QND0_DANRE	Q5U3T4_DANRE	Q4U0V5_DANRE	A0A0B4J1A6_DANRE	Q05AJ1_DANRE	Q803E3_DANRE	E9QEN4_DANRE	T1ECV3_DANRE	B7ZVL5_DANRE	A5YC70_DANRE	E9QGQ0_DANRE	Q9PUT7_DANRE	E7FDQ5_DANRE	Q7SXQ1_DANRE
molecular_function	GO:0005085	guanyl-nucleotide exchange factor activity	236	558	0.422939	1	2.09728e-26	1	0	SMR8B_DANRE	RGL1_DANRE	DAPLE_DANRE	DNMBP_DANRE	RGRF2_DANRE	TRIO_DANRE	RIC1_DANRE	A0A286YAC4_DANRE	B8JHS1_DANRE	E7FF78_DANRE	E7FEK1_DANRE	A0A286Y9S9_DANRE	F1QCK8_DANRE	A2RUX1_DANRE	Q1L9A0_DANRE	Q1LXZ0_DANRE	A9C3Q2_DANRE	Q1RLV0_DANRE	A0A2R8Q385_DANRE	A0A2R8Q8W8_DANRE	A0A2R8QF27_DANRE	F1R8D3_DANRE	A0A2R8Q0K6_DANRE	B0R034_DANRE	A0A2R8QRN5_DANRE	A0A2R8PWF3_DANRE	A0A2R8QRI5_DANRE	A0A2R8RSL7_DANRE	E9QJL8_DANRE	A0A0R4IVJ3_DANRE	A0A0R4ISB6_DANRE	A0A0R4IS28_DANRE	F1R7P0_DANRE	A0A2R8QD21_DANRE	A0A2R8QHV5_DANRE	F1RE63_DANRE	A0A2R8QQB8_DANRE	A0A2R8Q962_DANRE	X1WCL7_DANRE	F8W5Y3_DANRE
molecular_function	GO:0051015	actin filament binding	220	585	0.376068	1	2.45993e-17	1	0	TM201_DANRE	XIRP1_DANRE	CTNA2_DANRE	Q1RLT7_DANRE	E7EZ30_DANRE	Q1L8E6_DANRE	Q6NYJ1_DANRE	B6IDE1_DANRE	F1Q6K8_DANRE	Q9DGG8_DANRE	Q1LUP1_DANRE	X1WEC4_DANRE	A0A0R4IJP7_DANRE	Q6GMH1_DANRE	I3ISA3_DANRE	Q8AX99_DANRE	A9JRP8_DANRE	E7F3J0_DANRE	F1QSE1_DANRE	A0A2R8Q3W8_DANRE	B3DFS9_DANRE	X1WCS2_DANRE	F1QVU3_DANRE	F1QKS0_DANRE	F6NTM9_DANRE	A0A286YAV6_DANRE	F1Q828_DANRE	F6PAD0_DANRE	A0A0R4IKR8_DANRE	A0A2R8QEZ3_DANRE	A0A2R8Q8N4_DANRE	A0A2R8QI45_DANRE	R4GDU6_DANRE	A0A2R8Q9D2_DANRE	A0A2R8RL55_DANRE	A0A2R8QSN4_DANRE	A0A2R8QKB3_DANRE	A0A2R8RPR6_DANRE	X1WBM9_DANRE	A0A0G2L365_DANRE
cellular_component	GO:0005856	cytoskeleton	218	611	0.356792	1	1.80401e-57	1	0	INVS_DANRE	MCA3B_DANRE	JMY_DANRE	JAK1_DANRE	EYS_DANRE	DNMBP_DANRE	FA83H_DANRE	MCA3A_DANRE	MICA1_DANRE	COBL_DANRE	SHP2A_DANRE	RIPR2_DANRE	TIE2_DANRE	MYLIB_DANRE	TRADD_DANRE	NSMF_DANRE	AMR1A_DANRE	AMR1B_DANRE	CTNA2_DANRE	Q6NYJ1_DANRE	F1Q6A2_DANRE	F1QP36_DANRE	A0A0R4IG34_DANRE	E7F9H1_DANRE	Q6P697_DANRE	F8W5U5_DANRE	A0A0R4IVY5_DANRE	F1Q6T9_DANRE	B8JHS1_DANRE	Q1LUP1_DANRE	B8A574_DANRE	F1R1Q1_DANRE	Q4F876_DANRE	B8JHQ5_DANRE	A2RUX1_DANRE	E7F1C5_DANRE	Q803W9_DANRE	Q8JFS7_DANRE	Q7T303_DANRE	Q502K8_DANRE
biological_process	GO:0045944	positive regulation of transcription by RNA polymerase II	213	585	0.364103	1	1.28195e-12	1	0	SETD3_DANRE	EGR1_DANRE	FOXN4_DANRE	BCL9L_DANRE	CR3LA_DANRE	LDB1A_DANRE	BRD4_DANRE	NPS4A_DANRE	PAX6_DANRE	CR3LB_DANRE	PRD10_DANRE	RFX6_DANRE	MED25_DANRE	SOX1A_DANRE	SRBP2_DANRE	TBX5A_DANRE	YAP1_DANRE	PRDM9_DANRE	ZN750_DANRE	NCOA2_DANRE	N2F1A_DANRE	MYSM1_DANRE	IKKA_DANRE	E2F8_DANRE	DLX1A_DANRE	Q5QHS3_DANRE	Q9W6U0_DANRE	F1RC47_DANRE	A2CG09_DANRE	E9QCQ3_DANRE	F1QTT3_DANRE	F1RA62_DANRE	B2GM63_DANRE	F1R405_DANRE	Q9YHZ8_DANRE	Q30JB6_DANRE	F1R3C6_DANRE	F1Q910_DANRE	Q8AW20_DANRE	Q6NW63_DANRE
molecular_function	GO:0000977	RNA polymerase II transcription regulatory region sequence-specific DNA binding	212	666	0.318318	1	8.17618e-120	1	0	HMX3_DANRE	NPS4L_DANRE	NPS4A_DANRE	REST_DANRE	LHX3_DANRE	MSXD_DANRE	MSXA_DANRE	AP2E_DANRE	C1JIE2_DANRE	B0JZI0_DANRE	F1QTJ6_DANRE	A0A286YAN9_DANRE	F1QTT9_DANRE	E7F7Z6_DANRE	B8A688_DANRE	Q6NYI3_DANRE	A5PM72_DANRE	E9QG34_DANRE	E7F1G0_DANRE	F1QMQ9_DANRE	A8KC33_DANRE	B3DJD1_DANRE	A8WFV9_DANRE	Q90ZB2_DANRE	Q1LUU5_DANRE	B2KTE5_DANRE	X1WDD7_DANRE	A0A2R8QKN2_DANRE	Q58EF6_DANRE	E7F7L9_DANRE	A9JT09_DANRE	H9GXI3_DANRE	A0A0G2KFY4_DANRE	H0WE77_DANRE	H0WFB5_DANRE	E9QJ51_DANRE	A0A2R9YJP2_DANRE	F1QNB9_DANRE	E7F453_DANRE	Q8QGU1_DANRE
molecular_function	GO:0004674	protein serine/threonine kinase activity	204	1074	0.189944	0.000832522	0.999348	0.224	1	PLK4_DANRE	SMG1_DANRE	SIK3_DANRE	SPEG_DANRE	TRIO_DANRE	TLK2_DANRE	NEK8_DANRE	IKKA_DANRE	ALPK2_DANRE	B0S6T6_DANRE	B8A5U8_DANRE	Q0H1F2_DANRE	E7F7I3_DANRE	Q90ZY5_DANRE	A0JML4_DANRE	A0A0R4IVY5_DANRE	F1R801_DANRE	E7FE66_DANRE	E9QHI3_DANRE	A9ZMG5_DANRE	Q1LUZ7_DANRE	B0V360_DANRE	X1WGA8_DANRE	D1L3Y5_DANRE	Q803M9_DANRE	X1WG08_DANRE	Q1RLX1_DANRE	B0S8I4_DANRE	Q6NWY2_DANRE	Q8JFB0_DANRE	B3DJG0_DANRE	B0S6T7_DANRE	Q5RHZ0_DANRE	Q90Y37_DANRE	F1R8Q2_DANRE	Q5TZ42_DANRE	Q9W629_DANRE	F1QWY2_DANRE	Q7ZVD7_DANRE	B3IWJ8_DANRE
biological_process	GO:0048856	anatomical structure development	194	618	0.313916	1	2.08875e-24	1	0	PAX6_DANRE	PAX2A_DANRE	N2F1A_DANRE	AP2E_DANRE	F1R4K6_DANRE	A2BFS7_DANRE	Q91430_DANRE	F1QDN4_DANRE	Q501S1_DANRE	Q6GML8_DANRE	E7F1Z9_DANRE	Q9I9E8_DANRE	Q05AJ1_DANRE	F2Z4T1_DANRE	Q68EH3_DANRE	O57418_DANRE	Q803N1_DANRE	A0AUR9_DANRE	Q6NYI3_DANRE	A0JMM5_DANRE	Q8JFV5_DANRE	I3IT91_DANRE	F1QPC8_DANRE	Q504I6_DANRE	F1RD02_DANRE	F1QNU4_DANRE	F1R3E6_DANRE	Q9YHZ8_DANRE	B2KTE1_DANRE	Q66HX1_DANRE	B3DGQ7_DANRE	C0M005_DANRE	B2KTE4_DANRE	A0A286YB52_DANRE	Q567F5_DANRE	Q1L966_DANRE	L7NKH5_DANRE	E7F6Z5_DANRE	A3KNM1_DANRE	F1R5X1_DANRE
molecular_function	GO:0004712	protein serine/threonine/tyrosine kinase activity	192	663	0.289593	0.999856	0.000202227	1	0.155	PLK4_DANRE	SMG1_DANRE	JAK1_DANRE	EPB4A_DANRE	FGR1A_DANRE	SIK3_DANRE	SPEG_DANRE	TYRO3_DANRE	TIE2_DANRE	TRIO_DANRE	VGFR3_DANRE	TLK2_DANRE	NEK8_DANRE	ALPK2_DANRE	B3DGN7_DANRE	Q0H1F2_DANRE	E7F7I3_DANRE	F1Q6A2_DANRE	A0A0R4IVY5_DANRE	F1R801_DANRE	Q6DHN7_DANRE	F1R5S1_DANRE	A9ZMG5_DANRE	B3DKP1_DANRE	Q6NYW1_DANRE	B0V360_DANRE	D1L3Y5_DANRE	Q803M9_DANRE	D0FH56_DANRE	B3DJR6_DANRE	X1WG08_DANRE	Q6NWY2_DANRE	Q90Y37_DANRE	Q5TZ42_DANRE	F1QWY2_DANRE	Q5VSJ4_DANRE	Q1RLZ2_DANRE	B3IWJ8_DANRE	A0A0R4ILA5_DANRE	Q0H1F4_DANRE
molecular_function	GO:0005096	GTPase activator activity	186	450	0.413333	1	3.70939e-45	1	0	SC23A_DANRE	RH42A_DANRE	RHG29_DANRE	TBC8B_DANRE	MY9AB_DANRE	Q6AZ98_DANRE	A5PF31_DANRE	E7F7Y0_DANRE	A0A0R4IKK1_DANRE	E9QDU2_DANRE	A0A0R4IG34_DANRE	E7F9H1_DANRE	E7FE99_DANRE	F1Q8C7_DANRE	Q6DG95_DANRE	B3DI91_DANRE	B0S8J8_DANRE	F1QV08_DANRE	Q6DH84_DANRE	F1QXM3_DANRE	Q38JL1_DANRE	E7FE32_DANRE	F1QCL0_DANRE	Q1LXU3_DANRE	A2CEI3_DANRE	Q5TZG7_DANRE	F1QJX4_DANRE	A0A0R4IHI1_DANRE	A0A2R8QTS8_DANRE	A0A2R8Q8N1_DANRE	F8WJN2_DANRE	F6NQ92_DANRE	A0A0R4IHT5_DANRE	A0A0R4IIX0_DANRE	F6P057_DANRE	A0A0R4IBF6_DANRE	E7FDW4_DANRE	F1R309_DANRE	A0A0R4IH81_DANRE	A0A2R8QEF0_DANRE
biological_process	GO:0030154	cell differentiation	180	619	0.290792	1	3.12089e-24	1	0	PO3F1_DANRE	TAF8_DANRE	H6ST2_DANRE	DLX5A_DANRE	DLX2A_DANRE	HMX3_DANRE	ARAID_DANRE	DLX2B_DANRE	CP131_DANRE	BRDT_DANRE	FXC1B_DANRE	DLX6A_DANRE	K1522_DANRE	DLX4A_DANRE	NPS4A_DANRE	ETV4_DANRE	NKX11_DANRE	PO4F3_DANRE	PNX_DANRE	SOX2_DANRE	RFNG_DANRE	SOX1A_DANRE	TDRD9_DANRE	ZN750_DANRE	ZN423_DANRE	N2F1A_DANRE	DLX3B_DANRE	NDRG2_DANRE	DLX1A_DANRE	DLX4B_DANRE	5MP1_DANRE	C1JIE2_DANRE	Q98871_DANRE	A5WVQ1_DANRE	Q91430_DANRE	Q501S1_DANRE	Q9I9E8_DANRE	Q68EH3_DANRE	A5WVY6_DANRE	F1QPC8_DANRE
cellular_component	GO:0005576	extracellular region	156	885	0.176271	8.17005e-20	1	0	1	RUVB2_DANRE	STM_DANRE	APOA1_DANRE	EYS_DANRE	HEG_DANRE	CP131_DANRE	BAG6_DANRE	CCD39_DANRE	CCD40_DANRE	OFD1_DANRE	POC1B_DANRE	TSP4B_DANRE	IBP2B_DANRE	GLE1_DANRE	GILT_DANRE	Q0P3U6_DANRE	F1Q611_DANRE	F1QHR0_DANRE	Q2HPG0_DANRE	B0UYB0_DANRE	Q5TYP2_DANRE	F1R4X5_DANRE	Q1MT36_DANRE	B3DH26_DANRE	A0A0R4IU48_DANRE	F1QJD1_DANRE	Q6DBR1_DANRE	F1Q767_DANRE	B3DHC5_DANRE	Q6PFT2_DANRE	F1RAV1_DANRE	F1QLT3_DANRE	F1Q6J7_DANRE	E7F980_DANRE	E9QBB8_DANRE	A8E7B8_DANRE	E7FE04_DANRE	E9QDZ3_DANRE	F1QH90_DANRE	A0A2R8RQB1_DANRE
biological_process	GO:0048513	animal organ development	155	529	0.293006	1	1.09357e-08	1	0	A2ARH3_DANRE	Q0II00_DANRE	Q8JI11_DANRE	Q6NYJ1_DANRE	E9QDU2_DANRE	A4QNT9_DANRE	F1QY34_DANRE	D1YT98_DANRE	B3DJF0_DANRE	B3DFM3_DANRE	F1QSX8_DANRE	A0A0R4IJP7_DANRE	A2RUX1_DANRE	E7F2R2_DANRE	Q8AW20_DANRE	F1QFX6_DANRE	Q1L9A0_DANRE	Q5TZ42_DANRE	Q1L927_DANRE	Q5WQV6_DANRE	Q7ZZT0_DANRE	F1QQ56_DANRE	A0A2R8S045_DANRE	F6NQ92_DANRE	A0A0R4IIX0_DANRE	A0A2U3TW42_DANRE	A0A0R4IBF6_DANRE	A0A0R4IWT9_DANRE	E7F0K1_DANRE	F1QVH9_DANRE	B0UYM8_DANRE	B0UXW1_DANRE	E7F5U5_DANRE	A0A0R4IPD6_DANRE	A0A2R8PV28_DANRE	A0A2R8RKY8_DANRE	B0S790_DANRE	X1WF08_DANRE	F1RB67_DANRE	F8W3X1_DANRE
molecular_function	GO:0016887	ATP hydrolysis activity	150	509	0.294695	1	5.66891e-11	1	0	SUV3_DANRE	RUVB2_DANRE	DDX55_DANRE	KIF7_DANRE	ERCC3_DANRE	KIF22_DANRE	ERC6L_DANRE	DDX51_DANRE	FIGN_DANRE	TDRD9_DANRE	R213A_DANRE	R213B_DANRE	ASCC3_DANRE	CHD8_DANRE	NAV3_DANRE	DDX20_DANRE	DDX11_DANRE	F1QND0_DANRE	B8JKC1_DANRE	Q6DRM9_DANRE	E7F1G8_DANRE	E7FAN6_DANRE	Q7M558_DANRE	B2KTE1_DANRE	F1QMW5_DANRE	B2KTE4_DANRE	A0A0R4IHR6_DANRE	Q6DRE7_DANRE	F1QFC0_DANRE	F1QU72_DANRE	Q7T3L3_DANRE	F1R1N7_DANRE	E7FD91_DANRE	Q5SPB7_DANRE	B8A5K9_DANRE	Q7M559_DANRE	B2KTE3_DANRE	X1WGN9_DANRE	F1RBT2_DANRE	F1Q6J7_DANRE
molecular_function	GO:0003779	actin binding	146	410	0.356098	1	2.98785e-26	1	0	MCA3B_DANRE	SETD3_DANRE	JMY_DANRE	MCA3A_DANRE	MICA1_DANRE	PHR4A_DANRE	SHP2A_DANRE	MCA2B_DANRE	PHR4B_DANRE	NAV3_DANRE	MY9AB_DANRE	MYRIP_DANRE	F1QGX8_DANRE	B3DJI0_DANRE	Q4ZGL5_DANRE	A0A2R8QI85_DANRE	F1QP36_DANRE	E9QDU2_DANRE	B0UXI4_DANRE	A0A0R4IID9_DANRE	Q4ZGL0_DANRE	Q5RHJ3_DANRE	Q4F876_DANRE	B8JHQ5_DANRE	X1WDB0_DANRE	X1WG23_DANRE	F1QSU4_DANRE	Q7T303_DANRE	A0A140LH51_DANRE	Q502K8_DANRE	Q68EI5_DANRE	Q6YBS2_DANRE	Q4ZGK9_DANRE	Q32PU2_DANRE	B2ZZ14_DANRE	A5D6T0_DANRE	A0A0R4IER9_DANRE	A0A2R8QP15_DANRE	F1Q828_DANRE	A0A0R4IIX0_DANRE
biological_process	GO:0006886	intracellular protein transport	146	524	0.278626	0.979959	0.0240138	1	1	SNX17_DANRE	AP2MA_DANRE	COPB_DANRE	SC31A_DANRE	VP33B_DANRE	TGFA1_DANRE	RIC1_DANRE	TBC8B_DANRE	WDR11_DANRE	MYRIP_DANRE	AP2MB_DANRE	Q7ZW40_DANRE	Q6AZ98_DANRE	B0R024_DANRE	Q6PHV0_DANRE	Q6NYJ9_DANRE	Q567G5_DANRE	Q4VA89_DANRE	Q7SYK6_DANRE	Q5XIZ7_DANRE	A0A2R8Q071_DANRE	F1RD00_DANRE	F1QXM3_DANRE	Q7ZV18_DANRE	E7F114_DANRE	E7FE32_DANRE	Q567Y3_DANRE	Q7SY45_DANRE	A5D6T0_DANRE	F1QJX4_DANRE	A0A2R8QTS8_DANRE	A0A0R4IHT5_DANRE	R4GEF6_DANRE	A0A2R8QFR4_DANRE	A0A2R8RWS3_DANRE	E9QHE7_DANRE	E7FDW4_DANRE	F1R309_DANRE	E9QC84_DANRE	A0A2R8QEF0_DANRE
molecular_function	GO:0008017	microtubule binding	146	411	0.355231	1	7.55018e-12	1	0	MDM1_DANRE	KIF7_DANRE	JMY_DANRE	DAPLE_DANRE	KIF22_DANRE	NUSAP_DANRE	MXB_DANRE	CAM1B_DANRE	MXA_DANRE	MXE_DANRE	ABRX1_DANRE	HOOK1_DANRE	CLAP2_DANRE	E7F7H0_DANRE	B7ZV80_DANRE	Q1L8E6_DANRE	A0A2R8QI85_DANRE	Q6P0T6_DANRE	E7FAN6_DANRE	E7F9D4_DANRE	X1WDB0_DANRE	A2RUX1_DANRE	E7FCQ1_DANRE	Q08CG7_DANRE	A0A140LH51_DANRE	A0A2R8RQW0_DANRE	A0A0R4J7C3_DANRE	F1QVM8_DANRE	X1WGN9_DANRE	E7F517_DANRE	B2ZZ14_DANRE	A0A2R8QJ09_DANRE	F1Q828_DANRE	F1QPU7_DANRE	A0A0R4IIC0_DANRE	A0A0R4IZI6_DANRE	F1QIY3_DANRE	F1Q687_DANRE	A0A286Y8P6_DANRE	X1WC43_DANRE
molecular_function	GO:0003700	DNA-binding transcription factor activity	143	372	0.384409	1	1.0687e-127	1	0	HSF4_DANRE	HN1BA_DANRE	NPS4L_DANRE	FOXN4_DANRE	KLF1_DANRE	ARNT2_DANRE	PO5F1_DANRE	RFX2_DANRE	NFIL3_DANRE	TBX5A_DANRE	ZN148_DANRE	MED12_DANRE	PAX2A_DANRE	E2F8_DANRE	Q9W6U0_DANRE	B3DKN2_DANRE	C7DZJ6_DANRE	A3KNX0_DANRE	Q4L1M9_DANRE	F1RBN7_DANRE	A0A0R4IJ19_DANRE	F1RD02_DANRE	F1Q5S4_DANRE	Q1L8T8_DANRE	A0A1L1QZL6_DANRE	F1RC36_DANRE	A0A2R8QMP5_DANRE	Q5RIC3_DANRE	A0A0R4IYX5_DANRE	A8KBK0_DANRE	B0S576_DANRE	B3DKD9_DANRE	F1QJI5_DANRE	A0A0R4IRY1_DANRE	F1R394_DANRE	E9QC72_DANRE	A0A0R4ISZ0_DANRE	A0A0R4INF0_DANRE	A0A2R8RUX6_DANRE	X1WHG3_DANRE
cellular_component	GO:0005789	endoplasmic reticulum membrane	138	656	0.210366	0.287069	0.73959	1	1	NCLN_DANRE	SC23A_DANRE	TSN36_DANRE	DDRGK_DANRE	BECN1_DANRE	POMT2_DANRE	CR3LA_DANRE	PMGT2_DANRE	PTSS1_DANRE	OSTA_DANRE	CR3LB_DANRE	SC31A_DANRE	RHDF1_DANRE	SELT2_DANRE	RGRF2_DANRE	SRBP2_DANRE	UFL1_DANRE	DLG1_DANRE	NBAS_DANRE	IRAG2_DANRE	FADS2_DANRE	Q6AZ98_DANRE	L0ANA2_DANRE	F1QW75_DANRE	Q4G5V7_DANRE	E7F236_DANRE	Q5TZD3_DANRE	Q6PBQ4_DANRE	A0A0R4IZ17_DANRE	Q4G5W3_DANRE	Q7ZUD6_DANRE	F1R3G9_DANRE	Q7T1D7_DANRE	E7F114_DANRE	B8A4C4_DANRE	E7F517_DANRE	Q7SY45_DANRE	A0A2R8Q3B1_DANRE	A0A2R8QFB2_DANRE	A0A2R8Q0E9_DANRE
cellular_component	GO:0005874	microtubule	135	354	0.381356	1	4.55208e-12	1	0	MDM1_DANRE	M1I1A_DANRE	KIF7_DANRE	KIF22_DANRE	NUSAP_DANRE	MXB_DANRE	CAM1B_DANRE	FIGN_DANRE	MXA_DANRE	MXE_DANRE	TTLL6_DANRE	HOOK1_DANRE	CLAP2_DANRE	DCTN2_DANRE	B3DIU9_DANRE	F1QQ50_DANRE	E7F7H0_DANRE	B7ZV80_DANRE	F1R672_DANRE	Q1L8E6_DANRE	A0A2R8QI85_DANRE	E7FAN6_DANRE	E7F9D4_DANRE	Q6IQ78_DANRE	Q08CD9_DANRE	X1WDB0_DANRE	A0A140LH51_DANRE	A0A0R4J7C3_DANRE	D2XZ47_DANRE	X1WGN9_DANRE	B2ZZ14_DANRE	F1Q6J7_DANRE	A0A0R4IY79_DANRE	F1Q828_DANRE	E9QBH9_DANRE	A0A2R8RQB1_DANRE	A0A0R4IZI6_DANRE	A0A286Y8P6_DANRE	E7EYJ6_DANRE	F1QGA8_DANRE
biological_process	GO:0007507	heart development	132	429	0.307692	0.99987	0.000172966	1	0.247	TAB2_DANRE	RUVB2_DANRE	SPT6H_DANRE	LEO1_DANRE	NPS4L_DANRE	MIB1_DANRE	HEG_DANRE	BECN1_DANRE	PAF1_DANRE	EI3HB_DANRE	AXIN2_DANRE	PABPA_DANRE	NFIL3_DANRE	NUF2_DANRE	MCA2B_DANRE	NIPLA_DANRE	TBX5A_DANRE	POC1B_DANRE	TIE2_DANRE	WDR11_DANRE	MED12_DANRE	AGRG6_DANRE	F1QGX8_DANRE	E7EZ30_DANRE	Q4ZGL5_DANRE	Q9W6U0_DANRE	Q7T3D4_DANRE	A5YC70_DANRE	F1QTT3_DANRE	B2GM63_DANRE	Q9DFH2_DANRE	Q4ZGL0_DANRE	Q30JB6_DANRE	B8JIV1_DANRE	Q6NYN9_DANRE	B7ZUV4_DANRE	F1QSU4_DANRE	Q8JFB0_DANRE	Q98873_DANRE	B0BF33_DANRE
molecular_function	GO:0005525	GTP binding	127	886	0.143341	8.22765e-10	1	0	1	GTPB3_DANRE	MIRO1_DANRE	MXB_DANRE	MXA_DANRE	MXE_DANRE	Q6DRI5_DANRE	Q498P3_DANRE	Q5U3T8_DANRE	A0A2R8RWM8_DANRE	Q52WY2_DANRE	A0A0R4IA28_DANRE	Q6IQ78_DANRE	F1R372_DANRE	F6NJS4_DANRE	B8A4L3_DANRE	E7F7Z2_DANRE	Q7SZX9_DANRE	A0A077CZD0_DANRE	F1RDB1_DANRE	A8WG18_DANRE	A0A0R4IXR0_DANRE	F1QVP4_DANRE	A0A2R8RX84_DANRE	F1Q694_DANRE	Q5RJ11_DANRE	Q1LXP8_DANRE	A0A077D3Q6_DANRE	A0A2R8RIU7_DANRE	A0A2R8Q6I9_DANRE	X1WE97_DANRE	A0A2R8Q554_DANRE	B8A6H1_DANRE	E7EYJ1_DANRE	A2CEM4_DANRE	F1QXC3_DANRE	F1R1W9_DANRE	A0A2R8QQ02_DANRE	F1QLT6_DANRE	E9QCB3_DANRE	A0A2R8Q0F5_DANRE
molecular_function	GO:0061630	ubiquitin protein ligase activity	125	597	0.20938	0.27942	0.753039	1	1	RN145_DANRE	MDM2_DANRE	SH3R1_DANRE	RN152_DANRE	HACE1_DANRE	NSE1_DANRE	RNF8_DANRE	SMUF2_DANRE	TRIPC_DANRE	TRAF6_DANRE	UBR3_DANRE	PZR3B_DANRE	R213A_DANRE	R213B_DANRE	KCMF1_DANRE	Q7ZTZ6_DANRE	Q1LV60_DANRE	Q7T355_DANRE	R4L6W8_DANRE	F1Q546_DANRE	Q7T0K2_DANRE	B0R0S8_DANRE	E7FH41_DANRE	F1Q4N1_DANRE	F1QKD6_DANRE	U6C7X6_DANRE	F1QIK4_DANRE	A2VCZ7_DANRE	F1R5N4_DANRE	Q501T3_DANRE	F1R358_DANRE	Q6P0T1_DANRE	A8DZI0_DANRE	E7F1A2_DANRE	A0A286Y9V7_DANRE	A0A2R8PUN1_DANRE	A0A0R4IJZ5_DANRE	X1WE22_DANRE	F1QSH0_DANRE	A8WIS6_DANRE
cellular_component	GO:0005654	nucleoplasm	124	492	0.252033	1	3.11516e-10	1	0	MDM2_DANRE	LIN9_DANRE	MYNN_DANRE	PYM1_DANRE	RBM48_DANRE	MSL1_DANRE	SART3_DANRE	TRIPC_DANRE	BI2L2_DANRE	EMSY_DANRE	Q1LV62_DANRE	Q6IQH8_DANRE	E7FGM4_DANRE	Q1L8C6_DANRE	A5YC70_DANRE	E7F923_DANRE	Q7SYJ3_DANRE	A9JT69_DANRE	B0R0S8_DANRE	E7EZC0_DANRE	E7FH41_DANRE	B8JIV1_DANRE	A0A0R4IHR6_DANRE	Q5CZN9_DANRE	A0A0R4IJ26_DANRE	B7ZUV4_DANRE	F1RBA7_DANRE	Q7ZVN6_DANRE	F1QWB4_DANRE	Q5EB04_DANRE	F1QPZ8_DANRE	A8E7M3_DANRE	A0A2R8RP64_DANRE	H0WES6_DANRE	A0A140LGM4_DANRE	F1QRP4_DANRE	B0S649_DANRE	Q6ZM52_DANRE	M9MM95_DANRE	A0A0J9YJ67_DANRE
molecular_function	GO:0046983	protein dimerization activity	121	333	0.363363	0.999882	0.000168052	1	0.128	HN1BA_DANRE	NPS4L_DANRE	NSE1_DANRE	NPS4A_DANRE	SRBP2_DANRE	NCOA2_DANRE	MYCA_DANRE	NDF1_DANRE	C1JIE2_DANRE	Q5RFV1_DANRE	Q4L1M9_DANRE	F1RBN7_DANRE	Q6PBX3_DANRE	B0V3D1_DANRE	B3DJD1_DANRE	A4IG25_DANRE	A0A2R8RSG0_DANRE	F1Q9Z5_DANRE	F1RC36_DANRE	F1Q910_DANRE	Q4U3K9_DANRE	Q8JIG3_DANRE	B3DFN8_DANRE	F1QDI6_DANRE	B3DH92_DANRE	F1QNB9_DANRE	F1Q8E5_DANRE	E7F5J8_DANRE	F6NL66_DANRE	Q9IAJ4_DANRE	Q6DBZ9_DANRE	Q6P015_DANRE	F1QNL1_DANRE	A0A2R8Q7A1_DANRE	A0A2R8QM70_DANRE	F1QU78_DANRE	A0A2R8QGP3_DANRE	A0A0R4IH97_DANRE	F1R7N7_DANRE	B0V3D3_DANRE
cellular_component	GO:0045202	synapse	117	591	0.19797	0.999969	3.95777e-05	1	0.014	CEP89_DANRE	DNMBP_DANRE	PLCX3_DANRE	CPEB4_DANRE	PZR3B_DANRE	MY9AB_DANRE	KCMF1_DANRE	A0A286YAC4_DANRE	Q08CV1_DANRE	A0A2R8QI85_DANRE	B3DJY4_DANRE	Q0PJT8_DANRE	F8W634_DANRE	E9QC71_DANRE	Q568M9_DANRE	A0A286Y9S9_DANRE	A2CJ02_DANRE	B3DH97_DANRE	F1R4X5_DANRE	X1WDB0_DANRE	A2CJ03_DANRE	A0A140LH51_DANRE	A0A2R8S0F4_DANRE	E7F278_DANRE	F6PDA4_DANRE	B2ZZ14_DANRE	A0A0R4INP7_DANRE	F1Q828_DANRE	A0A2R8PYA5_DANRE	E7FFY0_DANRE	T1ECU0_DANRE	A0A0R4IIZ4_DANRE	A0A0R4IQW1_DANRE	A0A0R4IK22_DANRE	E7EYT4_DANRE	A0A0R4IFS3_DANRE	F1R1L1_DANRE	F1QG18_DANRE	E7F520_DANRE	X1WC43_DANRE
biological_process	GO:0048731	system development	117	252	0.464286	1	3.27464e-25	1	0	B7ZV80_DANRE	B6IDE1_DANRE	E7FAN6_DANRE	Q503J7_DANRE	A0A2R8RQW0_DANRE	Q5XJL9_DANRE	Q6DBS2_DANRE	X1WGN9_DANRE	F1QSE1_DANRE	A0A2R8QJ09_DANRE	A0A2R8QP15_DANRE	E7F2S5_DANRE	A0A2R8Q9D2_DANRE	A0A0G2L365_DANRE	F1QDH9_DANRE	F1RCT7_DANRE	E7F0X8_DANRE	A0A0G2L2R0_DANRE	E7F985_DANRE	F1QWH5_DANRE	E7F4J1_DANRE	F1QJZ1_DANRE	F1R5Y4_DANRE	F8W622_DANRE	A0A2R8Q8V2_DANRE	Q1LXI2_DANRE	A0A140LGD3_DANRE	E7FDX9_DANRE	A0A2R8QK05_DANRE	A0A2R8QUR4_DANRE	A0A2R8Q7G1_DANRE	A0A2R8Q9I2_DANRE	A0A2R8QM44_DANRE	F1QET8_DANRE	B0S6F2_DANRE	A0A2R8Q4Q8_DANRE	A0A2R8Q7J3_DANRE	E9QC56_DANRE	A0A2R8QSJ9_DANRE	A0A2R8PX20_DANRE
biological_process	GO:0007411	axon guidance	115	382	0.301047	0.999904	0.000138641	1	0.22	SE3AB_DANRE	SEM4E_DANRE	SE3AA_DANRE	ARNT2_DANRE	NRP1A_DANRE	UBP33_DANRE	TRIO_DANRE	TEN4_DANRE	B0S6T1_DANRE	Q53CM6_DANRE	Q1LXC4_DANRE	B3DLK0_DANRE	E7F1Y1_DANRE	A0A0R4IFP8_DANRE	F1QNC4_DANRE	A4JYK5_DANRE	B0S6D0_DANRE	E7FF78_DANRE	Q1LV94_DANRE	E7F898_DANRE	E9QHI1_DANRE	Q2LDA1_DANRE	F1QBD4_DANRE	F1QYE2_DANRE	Q5VSJ4_DANRE	Q1RLY9_DANRE	Q1RLV0_DANRE	A0A0R4ILA5_DANRE	A0A2R8Q385_DANRE	A0A2R8Q6S7_DANRE	F1QXE5_DANRE	A0A0R4IVJ3_DANRE	B8A6H1_DANRE	A0A2R8QRK0_DANRE	A0A2R8QQB8_DANRE	F8W5Y3_DANRE	A0A2R8Q0R5_DANRE	A0A2R8QL08_DANRE	F1R5P2_DANRE	A0A2R8QNE4_DANRE
biological_process	GO:0007155	cell adhesion	115	547	0.210238	0.921676	0.0873974	1	1	CNTN5_DANRE	NR3BA_DANRE	NR1AA_DANRE	SHP2A_DANRE	RIPR2_DANRE	TYRO3_DANRE	TBX2_DANRE	TSP4B_DANRE	F1QTT3_DANRE	Q5RHU2_DANRE	E7FA40_DANRE	B5DE36_DANRE	Q5I2A9_DANRE	B5DDZ4_DANRE	B3DGN6_DANRE	Q6IYD1_DANRE	A0A2R8QFW9_DANRE	E7F5T8_DANRE	F8W5D1_DANRE	A0A2R8QHK7_DANRE	A3KQB0_DANRE	A0A0R4IT40_DANRE	F1QUV8_DANRE	F8W5Z7_DANRE	F1Q9F4_DANRE	U3JA65_DANRE	E7F2X5_DANRE	A0A0R4IBZ9_DANRE	A0A0R4IKR0_DANRE	F1RC97_DANRE	A0A2R8RQZ3_DANRE	F8W4M8_DANRE	A0A2R8QDB8_DANRE	A0A2R8RQG5_DANRE	J9JI18_DANRE	A0A0R4IFF8_DANRE	M9MMA0_DANRE	A0A0R4IQ86_DANRE	A0A2R8RHT3_DANRE	A0A2R8PY22_DANRE
biological_process	GO:0045893	positive regulation of transcription, DNA-templated	114	295	0.386441	1	2.69389e-19	1	0	PHF8_DANRE	SETD3_DANRE	HN1BB_DANRE	HN1BA_DANRE	EGR1_DANRE	FOXN4_DANRE	ARNT2_DANRE	NPS4A_DANRE	ETV4_DANRE	PO5F1_DANRE	NUP85_DANRE	RFX6_DANRE	TBX5A_DANRE	ZN143_DANRE	UBP16_DANRE	WAC_DANRE	TRAF6_DANRE	MED12_DANRE	CHD8_DANRE	C1JIE2_DANRE	Q6IQH8_DANRE	Q4L1M9_DANRE	F1RBN7_DANRE	Q503Z8_DANRE	E7EEJ8_DANRE	R4L6W8_DANRE	F1RD02_DANRE	F1RAA7_DANRE	Q4V8V8_DANRE	F1QN56_DANRE	D1L3Y5_DANRE	Q6DHF1_DANRE	B3DHR9_DANRE	Q7SYM1_DANRE	Q6DGE6_DANRE	F1QK52_DANRE	B3DKD9_DANRE	A8E7M3_DANRE	E7F8Y0_DANRE	F1QL52_DANRE
molecular_function	GO:0003682	chromatin binding	112	340	0.329412	1	1.25242e-09	1	0	PHF8_DANRE	PHC2_DANRE	TICRR_DANRE	HPF1_DANRE	LRWD1_DANRE	FOXN4_DANRE	MCMBP_DANRE	PAF1_DANRE	BRD4_DANRE	PO5F1_DANRE	RNF8_DANRE	SOX2_DANRE	TAF2_DANRE	MSL1_DANRE	NIPLA_DANRE	TDRD3_DANRE	WAC_DANRE	JARD2_DANRE	KMT5B_DANRE	Q6DG57_DANRE	A2BG67_DANRE	F1RC47_DANRE	Q6DRM9_DANRE	A0JMM5_DANRE	A5JNG8_DANRE	F1RDU3_DANRE	E7FEN0_DANRE	E7EZC0_DANRE	Q9DFH2_DANRE	A4IG25_DANRE	A2BGQ6_DANRE	Q6DHF1_DANRE	F1QY85_DANRE	F1QUT1_DANRE	U3JAH0_DANRE	A2BG39_DANRE	E7EY37_DANRE	B8A5K9_DANRE	A1L231_DANRE	U3JB43_DANRE
molecular_function	GO:0106310	protein serine kinase activity	111	445	0.249438	0.917034	0.101386	1	1	PLK4_DANRE	SMG1_DANRE	SIK3_DANRE	SPEG_DANRE	TRIO_DANRE	TLK2_DANRE	NEK8_DANRE	ALPK2_DANRE	Q0H1F2_DANRE	E7F7I3_DANRE	F1R801_DANRE	Q6DHN7_DANRE	A9ZMG5_DANRE	Q6NYW1_DANRE	B0V360_DANRE	D1L3Y5_DANRE	Q803M9_DANRE	X1WG08_DANRE	Q6NWY2_DANRE	Q5TZ42_DANRE	F1QWY2_DANRE	B3IWJ8_DANRE	Q0H1F4_DANRE	A0A2R8Q9G8_DANRE	A0A2R8QI01_DANRE	A0A2R8RYK6_DANRE	A0A2R8RT66_DANRE	A0A2R8QBK5_DANRE	A0A2R8Q7F4_DANRE	E7F2F9_DANRE	A0A0H2UJD7_DANRE	F1Q551_DANRE	F1RB74_DANRE	A0A2R8QPF3_DANRE	A0A2R8PWM3_DANRE	B0S6K0_DANRE	F1Q5H3_DANRE	B8A4S3_DANRE	F1QMM7_DANRE	F1QJB6_DANRE
cellular_component	GO:0005739	mitochondrion	111	1053	0.105413	2.58449e-46	1	0	1	SUV3_DANRE	TIDC1_DANRE	CR19A_DANRE	C27C1_DANRE	GTPB3_DANRE	FUMH_DANRE	MIRO1_DANRE	NDUF7_DANRE	COQ8A_DANRE	MTU1_DANRE	HEM0_DANRE	MRM3A_DANRE	MRM3B_DANRE	P4K2A_DANRE	SPKAP_DANRE	PTCD3_DANRE	S238A_DANRE	WDR81_DANRE	AMR1A_DANRE	AMR1B_DANRE	D2HDH_DANRE	KANK2_DANRE	ACSF2_DANRE	GATB_DANRE	F1QQ50_DANRE	B0S6B9_DANRE	A0A0R4IFD3_DANRE	Q7T3F9_DANRE	Q5QKM9_DANRE	F1QFC0_DANRE	A5PN55_DANRE	Q6PC13_DANRE	F1QS99_DANRE	F1RBY1_DANRE	F1QMW8_DANRE	F1Q8J4_DANRE	F1QDN0_DANRE	A0A0R4IKF7_DANRE	A0A2R8QMH8_DANRE	F8W5R6_DANRE
molecular_function	GO:0003676	nucleic acid binding	110	360	0.305556	1	4.96403e-120	1	0	ASCC3_DANRE	GPT11_DANRE	CMTR1_DANRE	E9QJN4_DANRE	E7FGM4_DANRE	E7F923_DANRE	A0A0R4IHR6_DANRE	Q6DRE7_DANRE	A0A0R4IJ26_DANRE	A8E5K6_DANRE	F1RD88_DANRE	A5PM73_DANRE	F1R5C5_DANRE	A2BGG2_DANRE	A0A2R8RKV4_DANRE	A0A286YBW3_DANRE	E7F8R0_DANRE	F1R9W2_DANRE	F1R080_DANRE	A0A2R8QBY4_DANRE	I3IS56_DANRE	A0A0R4IGS9_DANRE	A0A0G2KXE4_DANRE	F1QRP4_DANRE	A0A2R8RP35_DANRE	F1QPH6_DANRE	E7EY45_DANRE	A0A2R8QIC4_DANRE	F1QKW1_DANRE	A0A2R8Q3K5_DANRE	A0A2R8Q097_DANRE	A0A2R8QQ92_DANRE	A0A0G2L234_DANRE	E7FE25_DANRE	A0A0R4IA19_DANRE	F1QAC0_DANRE	A0A2R8QIE0_DANRE	E7EXE0_DANRE	A0A0R4IP63_DANRE	F1R793_DANRE
cellular_component	GO:0005794	Golgi apparatus	108	619	0.174475	0.00480279	0.996084	0.654	1	SH3R1_DANRE	EXT1A_DANRE	GOGA5_DANRE	EXT1B_DANRE	EXT1C_DANRE	DNMBP_DANRE	BECN1_DANRE	PKHA8_DANRE	NAV3_DANRE	GKAP1_DANRE	CLAP2_DANRE	F1RE04_DANRE	Q498P3_DANRE	F1Q8R8_DANRE	B0UXI4_DANRE	Q1LUQ2_DANRE	Q5U3J4_DANRE	E7F995_DANRE	Q29RB5_DANRE	A4IG44_DANRE	Q6PHG0_DANRE	Q6GMG4_DANRE	A2RUX1_DANRE	Q6PE41_DANRE	A9JRR0_DANRE	A3KQ03_DANRE	A0A0R4IDC8_DANRE	Q7SY45_DANRE	B3DIT8_DANRE	A0A2R8Q9F8_DANRE	A0A0R4IXT6_DANRE	A0A2R8RU81_DANRE	A0A2R8QUB8_DANRE	A0A2R8QGL3_DANRE	E7F825_DANRE	F1QC36_DANRE	A0A2R8QTW5_DANRE	E7EY97_DANRE	A0A0R4IAU0_DANRE	A0A2R8QID4_DANRE
biological_process	GO:0000122	negative regulation of transcription by RNA polymerase II	107	357	0.29972	0.997786	0.00318201	1	0.994	MDM2_DANRE	SEM4E_DANRE	DLX2A_DANRE	DLX2B_DANRE	PAF1_DANRE	DLX4A_DANRE	LDB1A_DANRE	SKR1B_DANRE	N2F1A_DANRE	KANK2_DANRE	CNOT1_DANRE	E2F8_DANRE	DLX1A_DANRE	DLX4B_DANRE	Q91430_DANRE	Q9W6U0_DANRE	Q9YI02_DANRE	E7F0R9_DANRE	B2GM63_DANRE	B0R0S8_DANRE	Q9DFH2_DANRE	Q70ZY9_DANRE	B3DGQ7_DANRE	Q08BX8_DANRE	Q90XD1_DANRE	Q1L966_DANRE	B3DJN2_DANRE	E7F6Z5_DANRE	Q6NW63_DANRE	F1QUT1_DANRE	B3DK47_DANRE	A2VCZ7_DANRE	B0S8H2_DANRE	A5D6S0_DANRE	Q6W4T8_DANRE	Q1LVI0_DANRE	U3JB43_DANRE	Q6IQ71_DANRE	A0A2R8QMN6_DANRE	Q1LYM8_DANRE
biological_process	GO:0007015	actin filament organization	107	310	0.345161	1	6.83619e-09	1	0	EYS_DANRE	XIRP1_DANRE	DLG1_DANRE	Q9DGG8_DANRE	A0A2R8QN78_DANRE	A2RUX1_DANRE	E7F3J0_DANRE	F1QKS0_DANRE	F6NTM9_DANRE	A0A286YAV6_DANRE	A0A0R4IKR8_DANRE	A0A2R8QEZ3_DANRE	A0A2R8Q8N4_DANRE	A0A2R8QQG7_DANRE	A0A2R8QKB3_DANRE	A0A0R4IW85_DANRE	X1WBM9_DANRE	A0A2R8QSE5_DANRE	B8A6A9_DANRE	F1Q548_DANRE	F1R4L5_DANRE	A0A2R8QU03_DANRE	A0A0R4IRL3_DANRE	F1QP52_DANRE	X1WGL1_DANRE	F8W622_DANRE	F1R6L2_DANRE	E7F106_DANRE	Q1LXI2_DANRE	A0A0R4IVY1_DANRE	F1R4R9_DANRE	A0A2R8QUR4_DANRE	F1QPI5_DANRE	F1R527_DANRE	B0S6F2_DANRE	E7F062_DANRE	A0A286YAD0_DANRE	F1QI09_DANRE	A0A2R8QSJ9_DANRE	E7FF64_DANRE
biological_process	GO:0007156	homophilic cell adhesion via plasma membrane adhesion molecules	106	362	0.292818	0.991211	0.0120379	1	1	L1CA2_DANRE	TEN3_DANRE	TEN4_DANRE	F1RD80_DANRE	Q53CM6_DANRE	X1WCY4_DANRE	A4JYK5_DANRE	A0A2R8Q5S4_DANRE	X1WDW2_DANRE	B3DGN6_DANRE	E7F5T8_DANRE	A0A2R8Q6S7_DANRE	F1R376_DANRE	X1WGN5_DANRE	A0A2R8QHK7_DANRE	A0A2R8QRK0_DANRE	A0A2R8QL08_DANRE	A0A0G2L2R0_DANRE	E7F374_DANRE	A0A0R4IBZ9_DANRE	A8E7C6_DANRE	F1QTQ5_DANRE	F1RC97_DANRE	A0A2R8RQZ3_DANRE	A0A0R4IM30_DANRE	A0A2R8QAL3_DANRE	A0A2R8RQG5_DANRE	A0A0R4IFF8_DANRE	A0A140LGD3_DANRE	A0A2R8RQJ2_DANRE	A0A2R8PZW4_DANRE	F1QA09_DANRE	E7F957_DANRE	F1QGY4_DANRE	A0A0R4IQ86_DANRE	A0A2R8RHT3_DANRE	A0A0R4IJR6_DANRE	A0A0N4SUB1_DANRE	A0A0R4IRW1_DANRE	F1QC95_DANRE
molecular_function	GO:0003729	mRNA binding	104	359	0.289694	0.99987	0.000193153	1	0.154	NCBP3_DANRE	MTA70_DANRE	YTHD2_DANRE	TRD7A_DANRE	TRD7B_DANRE	SPT5H_DANRE	RFOX1_DANRE	CELF1_DANRE	CELF2_DANRE	N4BP1_DANRE	IF2B1_DANRE	E7FCA5_DANRE	Q1LV60_DANRE	Q6P124_DANRE	Q6P0B2_DANRE	E7F1G8_DANRE	Q6P2A9_DANRE	A1L2F4_DANRE	B8JL46_DANRE	A0A0R4IVY2_DANRE	F1Q4N1_DANRE	Q802Y1_DANRE	E7FD91_DANRE	F1QWB4_DANRE	M1ZML1_DANRE	A8DZI0_DANRE	A0A0R4IT73_DANRE	F1Q8M8_DANRE	F1QJB8_DANRE	B8JJU9_DANRE	F1Q898_DANRE	A0A2R8RSJ5_DANRE	A0A0R4IWL6_DANRE	F1QAZ9_DANRE	I3ISM5_DANRE	A0A2R8QKK6_DANRE	A0A2R8RHU1_DANRE	A0A0J9YJ24_DANRE	F1Q7N6_DANRE	E7FE02_DANRE
cellular_component	GO:0030424	axon	103	315	0.326984	0.999054	0.00134032	1	0.388	L1CA2_DANRE	ROGDI_DANRE	SC4AA_DANRE	TEN3_DANRE	NTF7_DANRE	DI2BA_DANRE	CTNA2_DANRE	ELAV4_DANRE	Q53CM6_DANRE	E7F1Y1_DANRE	A4JYK5_DANRE	Q6NZ01_DANRE	F1R1Q1_DANRE	F1R0W9_DANRE	Q5U3E5_DANRE	A0A2R8Q685_DANRE	A0A2R8QF27_DANRE	A0A2R8Q8U4_DANRE	A0A2R8Q9B4_DANRE	A0A2R8Q6S7_DANRE	F1R376_DANRE	A0A2R8PWF3_DANRE	A0A2R8QC86_DANRE	F1QKJ0_DANRE	A0A2R8QRK0_DANRE	E7F1D8_DANRE	A0A2R8QL08_DANRE	F1R4K2_DANRE	A0A2R8Q844_DANRE	A8E7C6_DANRE	A0A0R4IGI4_DANRE	F1QC52_DANRE	A0A2R8QPN6_DANRE	A0A2R8Q0G1_DANRE	Q1LWJ4_DANRE	A0A2R8PVT4_DANRE	F6PC33_DANRE	A0A140LFZ9_DANRE	A0A2R8QNV1_DANRE	F1QGY4_DANRE
cellular_component	GO:0043235	receptor complex	103	263	0.391635	0.999999	2.2944e-06	1	0.002	FGR1A_DANRE	TYRO3_DANRE	TIE2_DANRE	VGFR3_DANRE	A8WH88_DANRE	B3DI57_DANRE	F1R5S1_DANRE	B8JJU1_DANRE	B3DKP1_DANRE	A8WH93_DANRE	D0FH56_DANRE	A0A0R4IE17_DANRE	A8WH90_DANRE	Q1RLX1_DANRE	Q8JFB0_DANRE	B3DJG0_DANRE	Q9W629_DANRE	A0A0R4ITJ9_DANRE	Q5VSJ4_DANRE	A0A0R4ILA5_DANRE	A0A2R8QEU4_DANRE	F8W3W7_DANRE	F1R376_DANRE	F1RA13_DANRE	A0A2R8QI76_DANRE	F1QKJ0_DANRE	F1QMA9_DANRE	A0A2R8PYK8_DANRE	E7FAI5_DANRE	F1R5P2_DANRE	A0A2R8Q844_DANRE	A8E7C6_DANRE	E7FD22_DANRE	F6NI62_DANRE	Q1LWJ4_DANRE	A0A2R8QHE8_DANRE	F1QDE6_DANRE	E7FFT8_DANRE	A0A0R4IJL4_DANRE	A0A0R4IVD8_DANRE
cellular_component	GO:0015629	actin cytoskeleton	101	251	0.40239	1	7.12312e-14	1	0	TBX5A_DANRE	Q1RLT7_DANRE	F1Q6K8_DANRE	Q9DGG8_DANRE	X1WEC4_DANRE	A0A0R4IJP7_DANRE	Q803W9_DANRE	E7F3J0_DANRE	A0A2R8Q3W8_DANRE	F1QVU3_DANRE	F1QKS0_DANRE	F6NTM9_DANRE	A0A286YAV6_DANRE	F6PAD0_DANRE	A0A2R8QEZ3_DANRE	A0A2R8Q8N4_DANRE	A0A286Y9M1_DANRE	A0A2R8QKB3_DANRE	A0A2R8RPR6_DANRE	A0A2R8QSE5_DANRE	X1WE86_DANRE	B8A6A9_DANRE	A0A2R8QCX4_DANRE	F1Q548_DANRE	A0A0R4IRL3_DANRE	F8W622_DANRE	E7F106_DANRE	F1RA35_DANRE	Q1LXI2_DANRE	A0A2R8QQS8_DANRE	A0A0R4IVY1_DANRE	U3JB13_DANRE	F1R4R9_DANRE	A0A2R8RTS6_DANRE	U3JAM7_DANRE	A0A2R8QUR4_DANRE	F1R527_DANRE	B0S6F2_DANRE	F1QU62_DANRE	A0A286YAD0_DANRE
cellular_component	GO:0005813	centrosome	100	293	0.341297	1	1.94357e-07	1	0	PLK4_DANRE	MDM1_DANRE	SAS6_DANRE	STIL_DANRE	KIZ_DANRE	DAPLE_DANRE	CC14A_DANRE	CEP89_DANRE	CE290_DANRE	CEP63_DANRE	PPR35_DANRE	OFD1_DANRE	SDCG8_DANRE	UBP33_DANRE	RFIP3_DANRE	HOOK1_DANRE	NEK8_DANRE	IRAG2_DANRE	CE162_DANRE	DTL_DANRE	DCTN2_DANRE	B3DIU9_DANRE	F1QQ50_DANRE	E7F7H0_DANRE	Q7ZU21_DANRE	A0A0R4IK54_DANRE	Q08CD9_DANRE	Q6IQF6_DANRE	A9C3Q6_DANRE	F1QX00_DANRE	F1QVM8_DANRE	Q08CT1_DANRE	Q90Y37_DANRE	D2XZ47_DANRE	E7FCY1_DANRE	E7F186_DANRE	F1QPU7_DANRE	F1RBF5_DANRE	E9QBC3_DANRE	F1QW15_DANRE
biological_process	GO:0030036	actin cytoskeleton organization	99	314	0.315287	1	6.91694e-11	1	0	PHR4A_DANRE	PHR4B_DANRE	AMOL2_DANRE	F1QGX8_DANRE	B3DJI0_DANRE	Q4ZGL5_DANRE	B8A5U8_DANRE	A5JNG8_DANRE	Q4ZGL0_DANRE	Q5RHJ3_DANRE	B8JHQ5_DANRE	Q803W9_DANRE	F1QSU4_DANRE	E7F8Q6_DANRE	Q8AX99_DANRE	Q4ZGK9_DANRE	A0A0R4IER9_DANRE	F8W4Z1_DANRE	F1R1G8_DANRE	A0A2R8QM62_DANRE	A0A286Y857_DANRE	A0A2R8QJQ2_DANRE	A0A2R8Q7Y7_DANRE	E7EYZ7_DANRE	A0A2R8QLH8_DANRE	E9QFR8_DANRE	A0A2R8Q4F1_DANRE	E7FG55_DANRE	A0A0G2L1F5_DANRE	F1R7V2_DANRE	F1QDK4_DANRE	E9QFJ3_DANRE	A0A2R8QQS8_DANRE	E7FD42_DANRE	A0A2R8QE60_DANRE	A0A2R8QEH5_DANRE	X1WBR0_DANRE	X1WFY2_DANRE	I3ITM8_DANRE	F8W4C0_DANRE
biological_process	GO:0060271	cilium assembly	98	393	0.249364	0.99946	0.000761691	1	0.686	PLK4_DANRE	CF161_DANRE	DAAF1_DANRE	CP131_DANRE	CC14A_DANRE	CEP89_DANRE	CCD40_DANRE	DNMBP_DANRE	NPHP3_DANRE	COBL_DANRE	BBS2_DANRE	TALD3_DANRE	RFX2_DANRE	NOTC1_DANRE	ZN703_DANRE	YAP1_DANRE	UBX10_DANRE	POC1B_DANRE	TPC14_DANRE	WDR11_DANRE	PAX2A_DANRE	CE162_DANRE	DZI1L_DANRE	DZIP1_DANRE	BROMI_DANRE	CEP83_DANRE	F1QQ50_DANRE	Q7ZVN3_DANRE	F1QRE0_DANRE	Q52WY2_DANRE	E7FE66_DANRE	Q29RB5_DANRE	B0UYB0_DANRE	Q7ZUI3_DANRE	F1REQ6_DANRE	F1QHQ9_DANRE	A9C3Q6_DANRE	A2CEI3_DANRE	E7FCY1_DANRE	Q6ZM36_DANRE
cellular_component	GO:0005667	transcription regulator complex	98	261	0.375479	0.999997	4.30844e-06	1	0.002	MCAF1_DANRE	ARNT2_DANRE	LDB1A_DANRE	SKR1B_DANRE	SOX2_DANRE	TLE3B_DANRE	MED25_DANRE	SOX1A_DANRE	TLE3A_DANRE	C1JIE2_DANRE	Q6NZT5_DANRE	Q7T289_DANRE	Q9YI02_DANRE	Q7SZ61_DANRE	B3DJR5_DANRE	Q803N1_DANRE	F1RBN7_DANRE	B3DG00_DANRE	A4QN37_DANRE	A4IG25_DANRE	A0A2R8RSG0_DANRE	Q8JIG3_DANRE	E7FFR7_DANRE	Q7T351_DANRE	F1R5X1_DANRE	Q803K8_DANRE	Q7ZU53_DANRE	Q9PTS6_DANRE	Q6GMG3_DANRE	B0S576_DANRE	A0A0R4IC41_DANRE	A0A2R8QNC7_DANRE	A0A0R4IH97_DANRE	F6P8Y5_DANRE	A0A0R4IMQ4_DANRE	F1QTE0_DANRE	F8W338_DANRE	E7FDK6_DANRE	F1R259_DANRE	B0V229_DANRE
biological_process	GO:0009653	anatomical structure morphogenesis	97	325	0.298462	1	1.58831e-14	1	0	FXC1B_DANRE	PO5F1_DANRE	SOX2_DANRE	SOX1A_DANRE	A4QNT9_DANRE	D1YT98_DANRE	Q1LV18_DANRE	B2GM63_DANRE	Q6NY62_DANRE	B0UXI3_DANRE	Q7SYM1_DANRE	E7FFZ5_DANRE	E7FB43_DANRE	Q6DGE6_DANRE	B3DKD9_DANRE	E7F1D8_DANRE	E7F138_DANRE	F1R4K2_DANRE	A0A0R4IIA2_DANRE	F1QB00_DANRE	A0A2R8PV28_DANRE	A0A2R8RKY8_DANRE	X1WF08_DANRE	F8W3X1_DANRE	A0A2R8QD30_DANRE	Q1L8R8_DANRE	A0A2R8QK25_DANRE	A0A2R8PX08_DANRE	A0A2R8RWD9_DANRE	A0A2R8Q5H5_DANRE	R4GDT3_DANRE	E7F4F2_DANRE	E7F1G3_DANRE	E7F069_DANRE	E7FBV9_DANRE	A0A2R8RUJ4_DANRE	R4GEI0_DANRE	A0A0R4IQP3_DANRE	A0A2R8QIM7_DANRE	Q5RHM6_DANRE
biological_process	GO:0006325	chromatin organization	96	259	0.370656	1	1.15014e-07	1	0	PHF8_DANRE	TRRAP_DANRE	LRWD1_DANRE	AEBP2_DANRE	BAG6_DANRE	BABA1_DANRE	SE1BA_DANRE	MSL1_DANRE	TDRD3_DANRE	UBP16_DANRE	PRDM9_DANRE	WAC_DANRE	ABRX1_DANRE	CHD8_DANRE	KMT5B_DANRE	BANP_DANRE	EMSY_DANRE	F1R926_DANRE	E9QGQ0_DANRE	F1R0J6_DANRE	Q6DHF1_DANRE	F1QY85_DANRE	U3JB43_DANRE	I3IS77_DANRE	Q6IQ71_DANRE	A0A2R8Q8I0_DANRE	F1QXU6_DANRE	A0A2R8RPE6_DANRE	F1Q721_DANRE	F1QL52_DANRE	F1QHF6_DANRE	F1QV68_DANRE	A0A2R8QF37_DANRE	A0A2R8RLD2_DANRE	A0A2R8Q1Y5_DANRE	F1R259_DANRE	X1WG14_DANRE	A0A0R4J6P5_DANRE	A0A2R8QDI1_DANRE	A0A0R4IUG1_DANRE
molecular_function	GO:0003712	transcription coregulator activity	95	281	0.338078	1	3.46565e-25	1	0	PHF2_DANRE	PHF8_DANRE	TRRAP_DANRE	MCAF1_DANRE	LDB1A_DANRE	MED29_DANRE	MED17_DANRE	MED24_DANRE	MED15_DANRE	MD13L_DANRE	Q7SZ61_DANRE	Q803E3_DANRE	O73712_DANRE	A2CG09_DANRE	Q802C8_DANRE	Q4V8V8_DANRE	A0A2R8QEP6_DANRE	Q4QRG0_DANRE	F1QMY9_DANRE	Q6DHD0_DANRE	A1A5X7_DANRE	E9QI95_DANRE	A0A0B4J1A5_DANRE	Q5SP48_DANRE	F1QM38_DANRE	E7FGV8_DANRE	A0A0R4IH22_DANRE	A0A0R4IXV5_DANRE	F1R3J7_DANRE	F8W338_DANRE	K7DY74_DANRE	A0A2R8RLV5_DANRE	A0A0R4IBL3_DANRE	B0R0X6_DANRE	E7EYW7_DANRE	F6NW08_DANRE	F6NXN2_DANRE	R4GE16_DANRE	E9QEH8_DANRE	F1QFA9_DANRE
cellular_component	GO:0030425	dendrite	94	324	0.290123	0.99553	0.00604163	1	0.894	ROGDI_DANRE	CPEB4_DANRE	P4K2A_DANRE	NSMF_DANRE	NTF7_DANRE	DI2BA_DANRE	ELAV4_DANRE	A0A2R8QI85_DANRE	F8W634_DANRE	Q6NZ01_DANRE	B3DH97_DANRE	X1WDB0_DANRE	F1QV08_DANRE	E7FFP8_DANRE	Q6GMH1_DANRE	A0A140LH51_DANRE	F6PDA4_DANRE	F1Q7Y2_DANRE	E7F3J0_DANRE	B2ZZ14_DANRE	A0A2R8Q685_DANRE	F6NTM9_DANRE	A0A2R8RHW5_DANRE	A0A2R8Q8D8_DANRE	A0A286YAV6_DANRE	F1Q828_DANRE	F1Q6C6_DANRE	F1Q897_DANRE	X1WC43_DANRE	A0A2R8QJ64_DANRE	A0A2R8QJF4_DANRE	A0A2R8QPN6_DANRE	B8JHQ2_DANRE	F1RAQ0_DANRE	A0A2R8PX08_DANRE	F1QAG9_DANRE	A0A2R8QNR1_DANRE	E7FGK6_DANRE	Q5VSD9_DANRE	A0A286Y815_DANRE
biological_process	GO:0016567	protein ubiquitination	93	659	0.141123	6.6911e-07	1	0	1	SH3R1_DANRE	KEP1B_DANRE	MIB1_DANRE	CRBN_DANRE	HACE1_DANRE	RNF8_DANRE	SMUF2_DANRE	UBR3_DANRE	PZR3B_DANRE	FBXL5_DANRE	B0EVP9_DANRE	A0A2R8Q2X0_DANRE	E7EYF3_DANRE	A0A0R4IFZ8_DANRE	E7FH41_DANRE	U6C7X6_DANRE	Q499B0_DANRE	F1QIK4_DANRE	A2VCZ7_DANRE	B0EVP5_DANRE	F1R358_DANRE	B3DIT8_DANRE	A0A2R8Q7V8_DANRE	F8W3Q5_DANRE	A0A286Y9V7_DANRE	A0A0R4IJZ5_DANRE	X1WE22_DANRE	Q1LYI3_DANRE	B0R0S9_DANRE	F1QG48_DANRE	X1WC12_DANRE	A0A2R8QDY9_DANRE	F1QMZ7_DANRE	A0A0R4ILG6_DANRE	A0A2R8Q7I3_DANRE	F1QKR8_DANRE	X1WG91_DANRE	E7EYK8_DANRE	A0A2R8RVN4_DANRE	E7F3Z0_DANRE
biological_process	GO:0007399	nervous system development	92	278	0.330935	1	5.21573e-23	1	0	HMX3_DANRE	KDISB_DANRE	LDB1A_DANRE	SOX1A_DANRE	RFOX1_DANRE	TYRO3_DANRE	ZN423_DANRE	PAX2A_DANRE	NAV3_DANRE	NDRG2_DANRE	IF2B1_DANRE	5MP1_DANRE	B0S6T1_DANRE	C1JIE2_DANRE	F1QQ50_DANRE	B3DKL9_DANRE	A0A0R4IVY2_DANRE	Q1L966_DANRE	A2RUX1_DANRE	E7F6Z5_DANRE	B3DH26_DANRE	Q6DBT0_DANRE	A0A0R4IT73_DANRE	A0A2R8QEU4_DANRE	F8W3W7_DANRE	A0A2R8PUN1_DANRE	F1QMA9_DANRE	A0A2R8QNW3_DANRE	A0A2R8PYK8_DANRE	F8W338_DANRE	I3ISM5_DANRE	A0A2R8RHU1_DANRE	F6NSP9_DANRE	A0A2R8QD30_DANRE	U3JA78_DANRE	A0A2R8Q8A4_DANRE	F1QP50_DANRE	B8JLJ1_DANRE	B7ZD16_DANRE	E7EYX4_DANRE
biological_process	GO:0098609	cell-cell adhesion	91	256	0.355469	0.971088	0.0344883	1	1	JAM2A_DANRE	ARNT2_DANRE	PRTGB_DANRE	SCRIB_DANRE	PAL1A_DANRE	DLG1_DANRE	CTNA2_DANRE	E9QEG4_DANRE	X1WCY4_DANRE	B3DHL7_DANRE	B7ZVK8_DANRE	E7F1Y1_DANRE	F1QSX8_DANRE	B0CM22_DANRE	B0BF33_DANRE	A4JYK0_DANRE	X1WDW2_DANRE	A0A2R8QB05_DANRE	B0UXH8_DANRE	F6PEN0_DANRE	Q5RJ81_DANRE	E7EYJ7_DANRE	A0A0R4IIA7_DANRE	A0A2R8Q0L0_DANRE	A0A2R8QBL2_DANRE	A0A0G2L2R0_DANRE	A0A0R4IDZ8_DANRE	A0A2R8PXH2_DANRE	A0A2R8QGP7_DANRE	F1QUA3_DANRE	A0A2R8QAL3_DANRE	A0A0R4IFF8_DANRE	F1QPZ3_DANRE	A0A140LGD3_DANRE	B0S755_DANRE	A0A2R8RKI9_DANRE	F1QA09_DANRE	A0A0R4IQ86_DANRE	F1RBK4_DANRE	A0A286Y804_DANRE
biological_process	GO:0007169	transmembrane receptor protein tyrosine kinase signaling pathway	90	253	0.355731	1	4.81739e-07	1	0.001	FGR1A_DANRE	TYRO3_DANRE	TIE2_DANRE	VGFR3_DANRE	NTF7_DANRE	E7F020_DANRE	Q6NZ01_DANRE	F1R5S1_DANRE	B5DE36_DANRE	B3DKP1_DANRE	A0A0R4IEK8_DANRE	D0FH56_DANRE	B3DJR6_DANRE	Q5VSJ4_DANRE	A0A0R4ILA5_DANRE	A0A2R8QFW9_DANRE	F8W3W7_DANRE	F1R376_DANRE	F8W5D1_DANRE	A0A2R8QI76_DANRE	F1QKJ0_DANRE	A0A2R8PYK8_DANRE	E7FAI5_DANRE	F1R5P2_DANRE	A0A2R8Q844_DANRE	A0A2R8QB47_DANRE	A8E7C6_DANRE	E7FD22_DANRE	F6NI62_DANRE	Q1LWJ4_DANRE	A0A2R8QHE8_DANRE	F1QDE6_DANRE	E7FFT8_DANRE	F8W2R6_DANRE	F1QBU7_DANRE	F1QBD0_DANRE	F1QP50_DANRE	B8JLJ1_DANRE	E7EYX4_DANRE	G1K2P2_DANRE
biological_process	GO:0006511	ubiquitin-dependent protein catabolic process	88	390	0.225641	0.0691602	0.941293	1	1	KEP1B_DANRE	BAG6_DANRE	HACE1_DANRE	RNF8_DANRE	UBP33_DANRE	TRIPC_DANRE	WDR81_DANRE	UBP16_DANRE	MYLIB_DANRE	UBP13_DANRE	UBP37_DANRE	R213A_DANRE	R213B_DANRE	DTL_DANRE	ADRM1_DANRE	Q1LV60_DANRE	B7ZDA8_DANRE	Q7SXN6_DANRE	Q7T355_DANRE	R4L6W8_DANRE	E7EYF3_DANRE	E7FH41_DANRE	F1QY38_DANRE	F1Q4N1_DANRE	Q6GQM3_DANRE	Q6DGX8_DANRE	Q6DGY8_DANRE	Q501T3_DANRE	Q6P0T1_DANRE	A8DZI0_DANRE	Q4FE55_DANRE	H9KUW6_DANRE	A0A2R8QUB8_DANRE	K7DYG9_DANRE	E7F4N9_DANRE	A8WIS6_DANRE	A0A2R8QB18_DANRE	A0A2R8QKK6_DANRE	A2BGM8_DANRE	A0A2R8Q3R9_DANRE
biological_process	GO:0010468	regulation of gene expression	88	240	0.366667	1	3.73726e-115	1	0	ARAID_DANRE	PAX6_DANRE	PO5F1_DANRE	PRD10_DANRE	NIPLA_DANRE	YAP1_DANRE	PRDM9_DANRE	IF2B1_DANRE	A3KQW9_DANRE	Q9W6U0_DANRE	E9QCQ3_DANRE	A5JNG8_DANRE	Q6P2A9_DANRE	F1RA62_DANRE	E7F895_DANRE	Q9YHZ8_DANRE	A0A0R4IVY2_DANRE	A4IG25_DANRE	Q5CZN9_DANRE	F1QWB4_DANRE	A0A0R4IQL7_DANRE	F1QAC9_DANRE	F1QLG5_DANRE	E7F958_DANRE	F1RA06_DANRE	F1Q8M8_DANRE	I3ISK1_DANRE	A0A1L1QZC1_DANRE	A0A0R4INF0_DANRE	F1QAX5_DANRE	F1QAZ9_DANRE	F1R1X1_DANRE	A0A2R8RHU1_DANRE	A0A2R8Q8A4_DANRE	A0A1D5NSI1_DANRE	E9QG91_DANRE	A0A2R8RW59_DANRE	A0A1L1QZL8_DANRE	A0A2R8Q139_DANRE	F1Q597_DANRE
cellular_component	GO:0016459	myosin complex	87	173	0.50289	1	1.68503e-16	1	0	MY9AB_DANRE	CING_DANRE	E9QDU2_DANRE	B6IDE1_DANRE	Q9DGG8_DANRE	I3ISA3_DANRE	F1QSE1_DANRE	B3DFS9_DANRE	X1WCS2_DANRE	A0A2R8QP15_DANRE	F1QKS0_DANRE	A0A0R4IIX0_DANRE	A0A2R8Q9D2_DANRE	F1R1I5_DANRE	A0A2R8Q8Y3_DANRE	A0A0G2L365_DANRE	F1QDH9_DANRE	F1R5Y4_DANRE	F8W622_DANRE	A0A2R8Q8V2_DANRE	E7F106_DANRE	Q1LXI2_DANRE	A0A2R8QK05_DANRE	F1R4R9_DANRE	A0A2R8QUR4_DANRE	A0A2R8Q9I2_DANRE	F1R527_DANRE	A0A2R8QM44_DANRE	E7FE29_DANRE	B0S6F2_DANRE	A0A2R8Q4Q8_DANRE	A0A286YAD0_DANRE	A0A2R8QSJ9_DANRE	A0A0R4IPW9_DANRE	E7FDV0_DANRE	A0A2R8RZK3_DANRE	A0A0R4IXQ5_DANRE	A0A286YBM4_DANRE	E7FGA0_DANRE	B0S541_DANRE
biological_process	GO:0007018	microtubule-based movement	86	188	0.457447	1	4.43749e-13	1	0	KIF7_DANRE	KIF22_DANRE	DNAI3_DANRE	B7ZV80_DANRE	F1R672_DANRE	A7MD87_DANRE	E7FAN6_DANRE	A1A5Y4_DANRE	A0A2R8RQW0_DANRE	X1WGN9_DANRE	A0A2R8QJ09_DANRE	F1Q6J7_DANRE	A0A0R4IY79_DANRE	E9QBH9_DANRE	A0A1D5NS24_DANRE	A0A2R8RQB1_DANRE	F1RCT7_DANRE	E7F0X8_DANRE	E7F985_DANRE	F1QWH5_DANRE	E7F4J1_DANRE	A0A0R4IHI4_DANRE	F1QB07_DANRE	A0A0R4IGE5_DANRE	A0A0R4IUW7_DANRE	A0A2R8QB87_DANRE	E9QH47_DANRE	A0A0R4IXD8_DANRE	A0A2R8Q7G1_DANRE	K7DY80_DANRE	A0A2R8Q6Y8_DANRE	F1QET8_DANRE	A0A2R8Q7J3_DANRE	E9QC56_DANRE	A0A2R8PX20_DANRE	A0A1D5NT12_DANRE	B0UYK4_DANRE	A0A2R8QMF4_DANRE	I3ITD2_DANRE	A0A0R4IM96_DANRE
molecular_function	GO:0004725	protein tyrosine phosphatase activity	85	281	0.302491	0.99922	0.00122343	1	0.573	CC14A_DANRE	Q7ZVN3_DANRE	B6HY54_DANRE	F1QNU4_DANRE	F1Q6T9_DANRE	A0A1L1QZV5_DANRE	Q66HX1_DANRE	Q803R3_DANRE	Q8JFS7_DANRE	B7ZD37_DANRE	F1R5X1_DANRE	Q7T2L8_DANRE	Q6NYH0_DANRE	A0A0R4ITJ9_DANRE	Q6DBY3_DANRE	A0A1B1LZI1_DANRE	F1Q653_DANRE	E9QGZ3_DANRE	E9QIR1_DANRE	A0A0R4IIZ4_DANRE	E9QJ32_DANRE	A0A286YBL8_DANRE	A0A2R8PWP1_DANRE	A0A0R4IZV3_DANRE	X1WET2_DANRE	A0A0R4IA95_DANRE	A0A2R8QJG1_DANRE	A0A2R8QM14_DANRE	Q1L9G1_DANRE	A0A2R8RL72_DANRE	X1WFY2_DANRE	E7F716_DANRE	A0A2R8QJY8_DANRE	A0A2R8Q001_DANRE	A0A0J9YJD7_DANRE	F1R1D1_DANRE	A0A2R8QGM2_DANRE	F1QBE0_DANRE	A0A0R4IWH3_DANRE	F1Q5R9_DANRE
molecular_function	GO:0031267	small GTPase binding	83	228	0.364035	1	9.02151e-07	1	0.001	MCA3B_DANRE	HACE1_DANRE	MCA3A_DANRE	RFP4A_DANRE	RFIP3_DANRE	XPOT_DANRE	XPO2_DANRE	MYRIP_DANRE	B3DJI0_DANRE	E7F7I3_DANRE	A2VD24_DANRE	A0A0R4IVY5_DANRE	Q6DKF7_DANRE	Q5RHJ3_DANRE	Q90Y37_DANRE	A0A0R4IER9_DANRE	G1K2X8_DANRE	B0S6M2_DANRE	A0A2U3TW42_DANRE	A0A0R4IWU7_DANRE	A0A2R8QFR4_DANRE	E9QHE7_DANRE	F1RDC5_DANRE	A0A286Y857_DANRE	A0A2R8QGL3_DANRE	A0A2R8PZL9_DANRE	A0A2R8QTW5_DANRE	A0A286Y8U4_DANRE	A0A2R8Q7Y7_DANRE	A0A0R4IUH7_DANRE	A0A0R4IHW6_DANRE	A0A0R4IK82_DANRE	A0A2R8RNP8_DANRE	E7F8C0_DANRE	T1ECS7_DANRE	F1QI20_DANRE	A0A2R8QKF9_DANRE	A0A2R8Q4Y5_DANRE	R4GE71_DANRE	F1R5F2_DANRE
biological_process	GO:0006897	endocytosis	83	230	0.36087	0.911488	0.103834	1	1	SCAR5_DANRE	AP2MA_DANRE	MIB1_DANRE	BECN1_DANRE	UBP33_DANRE	AP2MB_DANRE	A2ARH3_DANRE	Q5U3T8_DANRE	Q52WY2_DANRE	Q5U3J4_DANRE	Q9DGG8_DANRE	E7F7Z2_DANRE	F1RD00_DANRE	A2CEI3_DANRE	A0A0R4IKR8_DANRE	A0A0R4IB03_DANRE	B0UXI0_DANRE	A0A2R8QBK7_DANRE	X1WBM9_DANRE	F1QIJ6_DANRE	B0UXN4_DANRE	U3JA74_DANRE	A0A0R4IDZ8_DANRE	F1QV21_DANRE	A0A286YA11_DANRE	K7DYA0_DANRE	X1WGL1_DANRE	F1QMR6_DANRE	F1R6L2_DANRE	F1R4R9_DANRE	A0A2R8QD80_DANRE	G1K2F5_DANRE	A0A2R8RHT0_DANRE	A0A2R8QND0_DANRE	F1QF73_DANRE	A0A2R8QJD2_DANRE	A0A2R8RHR6_DANRE	A0A0R4ITB0_DANRE	A0A2R8RKF4_DANRE	E7FGA0_DANRE
molecular_function	GO:0042393	histone binding	82	239	0.343096	1	2.25712e-07	1	0	PHC2_DANRE	SPT6H_DANRE	SPT2_DANRE	HPF1_DANRE	BRD4_DANRE	RNF8_DANRE	SART3_DANRE	TONSL_DANRE	UBP16_DANRE	CHD8_DANRE	MYSM1_DANRE	A2CG09_DANRE	F1RDU3_DANRE	F1R0J6_DANRE	E7FEN0_DANRE	F1QPB3_DANRE	Q1LUU4_DANRE	Q6DHD0_DANRE	Q5SPB7_DANRE	A0A2R8Q8I0_DANRE	A0A2R8QPC0_DANRE	F1R3T7_DANRE	A0A2R8RZV0_DANRE	F1QXQ3_DANRE	A0A2R8PYX0_DANRE	A0A2R8QAV7_DANRE	A0A2R8QF67_DANRE	B0R0X6_DANRE	F6P2R0_DANRE	F6NXN2_DANRE	A0A2R8RV42_DANRE	E7F6V1_DANRE	A0A2R8QA26_DANRE	A0A0G2KGP5_DANRE	A0A286Y9G2_DANRE	A0A286YAM6_DANRE	F8W2W1_DANRE	F1R4F8_DANRE	E7F336_DANRE	A0A2R8S0H3_DANRE
biological_process	GO:0015031	protein transport	82	327	0.250765	0.8796	0.133403	1	1	CE290_DANRE	CHMP7_DANRE	CCD22_DANRE	CHM2B_DANRE	COG4_DANRE	NUP42_DANRE	PKHA8_DANRE	RHDF1_DANRE	S7A6O_DANRE	TIM8A_DANRE	UEVLD_DANRE	CHM1A_DANRE	HOOK1_DANRE	NBAS_DANRE	HIKES_DANRE	NDC1_DANRE	GLE1_DANRE	Q6WFZ4_DANRE	B0UXH0_DANRE	Q6P0B3_DANRE	Q6ZM71_DANRE	F1QIC2_DANRE	A5PMM5_DANRE	A2CEI3_DANRE	Q1LXR3_DANRE	A0A286YB68_DANRE	A0A0R4IXT6_DANRE	A0A0R4IRH4_DANRE	F1Q6W8_DANRE	A0A0R4IY52_DANRE	F1R5J4_DANRE	F1Q966_DANRE	Q1L8P8_DANRE	F1R226_DANRE	A0A2R8RNM0_DANRE	A0A0R4IDN5_DANRE	E9QF76_DANRE	A0A2R8Q710_DANRE	A0A2R8QNM4_DANRE	A0A0R4IZD5_DANRE
biological_process	GO:0006281	DNA repair	81	224	0.361607	0.999999	1.07601e-06	1	0.006	RUVB2_DANRE	TICRR_DANRE	TRRAP_DANRE	SMAL1_DANRE	MMS19_DANRE	JMY_DANRE	FUMH_DANRE	PDS5A_DANRE	PSM4A_DANRE	PARI_DANRE	TRIPC_DANRE	UFL1_DANRE	PSM4B_DANRE	I80DB_DANRE	KMT5B_DANRE	FAN1_DANRE	EMSY_DANRE	DDX11_DANRE	Q6DG57_DANRE	Q6DRM9_DANRE	F1QNU4_DANRE	Q6P2T4_DANRE	Q7M558_DANRE	Q66HX1_DANRE	A0A0R4IHR6_DANRE	Q1LXB1_DANRE	A2BGQ6_DANRE	F1R5X1_DANRE	Q5SPB7_DANRE	Q7M559_DANRE	Q66I03_DANRE	Q6DBY3_DANRE	E9QGZ3_DANRE	E9QIR1_DANRE	E7F8R0_DANRE	A0A2R8Q1Y3_DANRE	A0A2R8QQ92_DANRE	E9QJ32_DANRE	A0A2R8QCL7_DANRE	F1Q529_DANRE
molecular_function	GO:0003714	transcription corepressor activity	81	208	0.389423	1	4.57161e-08	1	0	TLE3B_DANRE	YAP1_DANRE	TLE3A_DANRE	Q7T289_DANRE	B3DJR5_DANRE	E7F0R9_DANRE	E7FFR7_DANRE	Q1LUU4_DANRE	A5D6S0_DANRE	A0A0G2L4M0_DANRE	Q9PTS6_DANRE	Q1LYM8_DANRE	A0A0R4IFH8_DANRE	F1QD18_DANRE	A0A2R8QNC7_DANRE	A0A2R8RSE5_DANRE	F6P8Y5_DANRE	F1QXQ3_DANRE	A0A2R8Q304_DANRE	A0A2R8Q678_DANRE	Q5SP48_DANRE	F1QWG8_DANRE	F1QTE0_DANRE	A0A140LGI3_DANRE	F8W4E9_DANRE	E7FF48_DANRE	A0A2R8QET6_DANRE	B0UYL3_DANRE	A0A2R8QJN8_DANRE	F1QTJ1_DANRE	A0A286Y9G2_DANRE	Q1MT18_DANRE	A0A2R8QUG9_DANRE	A0A2R8QGH8_DANRE	F6PDP0_DANRE	E7F336_DANRE	F1R8E1_DANRE	X1WDS1_DANRE	A0A2R8Q4C2_DANRE	E7F2K0_DANRE
biological_process	GO:0001525	angiogenesis	80	288	0.277778	0.623898	0.413934	1	1	SMAL1_DANRE	CEIP2_DANRE	NR3BA_DANRE	NRP1A_DANRE	NOTC1_DANRE	THS7A_DANRE	TIE2_DANRE	WNT5B_DANRE	VGFR3_DANRE	AMOL2_DANRE	HXD4A_DANRE	Q0II00_DANRE	A9JR96_DANRE	C0SQ71_DANRE	A0A0R4IFP8_DANRE	F1R801_DANRE	B0S6D0_DANRE	B3DKP1_DANRE	Q30JB6_DANRE	Q6P3M5_DANRE	X1WG08_DANRE	E9QCK7_DANRE	Q8JFB0_DANRE	F1RD88_DANRE	E7F8Q6_DANRE	Q90VY7_DANRE	A0A0R4ITJ9_DANRE	Q1RLY9_DANRE	F1QTF2_DANRE	A0A2R8Q779_DANRE	F1QXE5_DANRE	F1RE63_DANRE	Q1MT43_DANRE	F6P1L8_DANRE	A0A0R4IFS9_DANRE	E7F2F9_DANRE	F1QN93_DANRE	A0A2R8QHE8_DANRE	F1QCA7_DANRE	B8A551_DANRE
molecular_function	GO:0005198	structural molecule activity	80	208	0.384615	0.34922	0.680472	1	1	K1C18_DANRE	COPB_DANRE	SC31A_DANRE	F6P9T1_DANRE	Q6DG66_DANRE	F1QTT3_DANRE	A8E5I2_DANRE	Q6DHB6_DANRE	Q1RLR3_DANRE	Q6DBU4_DANRE	A0A2R8QI68_DANRE	Q68EI5_DANRE	A5WUY5_DANRE	E7F114_DANRE	A0A0R4ID71_DANRE	Q6NYL7_DANRE	A0A2R8PZA9_DANRE	A0A286Y8D1_DANRE	A0A0R4IJ71_DANRE	A5WV02_DANRE	F1QUV8_DANRE	A0A2R8QSE5_DANRE	B8A6A9_DANRE	F1Q4X8_DANRE	F1Q548_DANRE	F8W4M8_DANRE	A0A2R8QDB8_DANRE	F1RA35_DANRE	A0A2R8QKW7_DANRE	A0A286YAI4_DANRE	F1QCR7_DANRE	A0A2R8QR17_DANRE	F8W4Q1_DANRE	A0A2R8PY22_DANRE	A0A2R8RUW2_DANRE	A0A0R4INC4_DANRE	E9QCV2_DANRE	A0A0N4SUF2_DANRE	F1QR21_DANRE	A0A0R4IM03_DANRE
biological_process	GO:0007420	brain development	79	335	0.235821	0.995043	0.006237	1	1	PHF8_DANRE	PO3F1_DANRE	PO3F2_DANRE	NEST_DANRE	MIB1_DANRE	KIF22_DANRE	CLP1_DANRE	BAG6_DANRE	EMX1_DANRE	ARNT2_DANRE	BSH_DANRE	EI3HB_DANRE	PMGT2_DANRE	MELT_DANRE	PO5F1_DANRE	PO4F3_DANRE	P3F3A_DANRE	ZN703_DANRE	NIPLA_DANRE	PAL1A_DANRE	YAP1_DANRE	TBX2_DANRE	P3F3B_DANRE	ZRN1B_DANRE	CHD8_DANRE	B0S6T1_DANRE	F1QQ50_DANRE	Q6NZT5_DANRE	Q1L8E6_DANRE	E7F1Y1_DANRE	Q6NZ01_DANRE	Q1LV18_DANRE	Q9I9B7_DANRE	B0CM22_DANRE	A2VD21_DANRE	F1Q7K3_DANRE	A1IH00_DANRE	Q90264_DANRE	Q6DGE6_DANRE	A0A2R8Q8N1_DANRE
molecular_function	GO:0003713	transcription coactivator activity	78	179	0.435754	1	7.95204e-17	1	0	PHF2_DANRE	SETD3_DANRE	JMY_DANRE	BCL9L_DANRE	ARI5B_DANRE	TADA3_DANRE	MED6_DANRE	TDRD3_DANRE	YAP1_DANRE	UBP16_DANRE	MED12_DANRE	MYSM1_DANRE	A2CG09_DANRE	F1QTT3_DANRE	F1R405_DANRE	D1L3Y5_DANRE	Q66HZ5_DANRE	Q802V1_DANRE	A0A2R8Q8I0_DANRE	F1RBG9_DANRE	A0A0R4IPF8_DANRE	E7F9J6_DANRE	F1RBA9_DANRE	F1R3T7_DANRE	Q5SP48_DANRE	F1QUV8_DANRE	A0A2R8Q6N1_DANRE	A0A2R8QF67_DANRE	Q1L8S4_DANRE	E7F442_DANRE	F1QKM6_DANRE	F8W4M8_DANRE	A0A2R8QDB8_DANRE	F1R259_DANRE	A0A2R8QKJ7_DANRE	A0A2R8Q9X1_DANRE	A0A0R4IR18_DANRE	R4GEM4_DANRE	A0A0R4IUG1_DANRE	F1Q7J8_DANRE
cellular_component	GO:0043005	neuron projection	78	473	0.164905	0.950642	0.0563714	1	1	CNTN5_DANRE	BBS2_DANRE	CPEB4_DANRE	P4K2A_DANRE	TEN3_DANRE	TEN4_DANRE	VSI10_DANRE	DLG1_DANRE	Q08CV1_DANRE	Q6IWP4_DANRE	B3DJY4_DANRE	Q0PJT8_DANRE	Q1LY45_DANRE	E7F9D4_DANRE	A3KNU7_DANRE	Q568M9_DANRE	A0A0R4J7C3_DANRE	A0A2R8Q360_DANRE	E7FAT2_DANRE	Q5U3E5_DANRE	Q5VSJ4_DANRE	A0A0R4ILA5_DANRE	F1QV17_DANRE	E9QDJ5_DANRE	E7FFY0_DANRE	I3IS42_DANRE	F1Q6W8_DANRE	E7EYT4_DANRE	A0A286Y8P6_DANRE	F1R5P2_DANRE	F1QU90_DANRE	E9QHL0_DANRE	A0A286Y9K8_DANRE	A0A0G2KYC0_DANRE	F1QPM0_DANRE	F1RA92_DANRE	X1WBF7_DANRE	F1QW20_DANRE	F1R5G4_DANRE	A0A140LGX8_DANRE
cellular_component	GO:0030054	cell junction	78	145	0.537931	1	8.22899e-22	1	0	DAPLE_DANRE	HEG_DANRE	SDCG8_DANRE	SCRIB_DANRE	XIRP1_DANRE	AMOL2_DANRE	DLG1_DANRE	F1Q5F4_DANRE	B7ZVK8_DANRE	E7F2A2_DANRE	B5DDZ4_DANRE	E7EZS2_DANRE	Q1JPU9_DANRE	B0V218_DANRE	Q8AX99_DANRE	F8W4Z1_DANRE	A0A0R4IWX6_DANRE	E7EYJ7_DANRE	B0V219_DANRE	A0A286YAJ7_DANRE	F1Q649_DANRE	E9QFR8_DANRE	A0A0G2L1F5_DANRE	F1QP52_DANRE	F1R7V2_DANRE	E7F355_DANRE	F1QDK4_DANRE	A0A2R8PYV4_DANRE	A0A0R4IWR5_DANRE	A0A2R8QE60_DANRE	I3ITI8_DANRE	A0A0R4ILA7_DANRE	A0A2R8QAD7_DANRE	F8W4C0_DANRE	A0A2R8QEN6_DANRE	A0A0H2UKN4_DANRE	A0A2R8Q317_DANRE	A0A2R8QSL0_DANRE	F1R0H8_DANRE	F1QXB0_DANRE
molecular_function	GO:0004930	G protein-coupled receptor activity	77	762	0.10105	6.58841e-42	1	0	1	GP161_DANRE	GPR22_DANRE	TM116_DANRE	AGRA3_DANRE	AGRV1_DANRE	C3AR_DANRE	AGRA2_DANRE	AGRG6_DANRE	Q5U389_DANRE	F1R8K4_DANRE	F1Q5N3_DANRE	Q6WZB3_DANRE	Q8AWE0_DANRE	Q7T1A1_DANRE	Q2MHK8_DANRE	Q9W6E3_DANRE	Q2PRL7_DANRE	E4W699_DANRE	C5NS01_DANRE	A0A0R4IF44_DANRE	F1QU09_DANRE	F8W5T4_DANRE	E7F1D8_DANRE	F1R1L1_DANRE	F1QG18_DANRE	A0A0R4IIA2_DANRE	F1QB00_DANRE	E7FGF1_DANRE	F1Q7W7_DANRE	A0A0R4IV20_DANRE	F1QWX3_DANRE	A0A2R8PX08_DANRE	A0A0R4IB59_DANRE	F1QLQ2_DANRE	F1QQR2_DANRE	A0A2R8Q2D7_DANRE	R4GDT3_DANRE	E7F4F2_DANRE	E7F1G3_DANRE	A0A0R4IH68_DANRE
biological_process	GO:0032502	developmental process	77	279	0.275986	1	8.61888e-27	1	0	S7A6O_DANRE	Q7ZVN3_DANRE	A0A1L1QZV5_DANRE	Q803R3_DANRE	F1RC36_DANRE	Q8JFS7_DANRE	B7ZD37_DANRE	F1Q8E5_DANRE	Q6NYH0_DANRE	F6NL66_DANRE	Q6DBZ9_DANRE	Q6P015_DANRE	F1Q653_DANRE	A0A2R8QGP3_DANRE	A0A0R4IIZ4_DANRE	E9QBT6_DANRE	F1QQW3_DANRE	M9MM95_DANRE	E9QEC7_DANRE	F1Q649_DANRE	A0A2R8PWP1_DANRE	A0A0R4IZV3_DANRE	A0A2R8QM14_DANRE	Q1L9G1_DANRE	A0A0R4IXK2_DANRE	A0A0R4IU64_DANRE	A0A2R8RL72_DANRE	X1WFY2_DANRE	F1QUA1_DANRE	A0A2R8QJY8_DANRE	F6PD48_DANRE	E7FBV7_DANRE	A0A0R4IRV6_DANRE	F1R1D1_DANRE	A0A2R8QGM2_DANRE	F1QBK5_DANRE	F1QBE0_DANRE	A0A0R4IWH3_DANRE	A0A0A0MPF8_DANRE	E7FH10_DANRE
biological_process	GO:0007264	small GTPase mediated signal transduction	75	226	0.331858	0.999997	5.16492e-06	1	0.016	RGL1_DANRE	DAPLE_DANRE	MIRO1_DANRE	RGRF2_DANRE	A0A286YAC4_DANRE	A0A286Y9S9_DANRE	Q1L9A0_DANRE	A9C3Q2_DANRE	B0R034_DANRE	E9QJL8_DANRE	A0A2R8Q962_DANRE	F6P5U6_DANRE	E7F520_DANRE	A0A0R4I9J2_DANRE	E9QDY7_DANRE	E7FDC9_DANRE	F1QJ79_DANRE	F1RDE1_DANRE	F1QAS2_DANRE	A0A2R8PYV4_DANRE	A0A0R4IDU6_DANRE	E9QE63_DANRE	A0A2R8QG49_DANRE	A0A2R8QFE0_DANRE	E7FBN7_DANRE	A0A2R8QAD7_DANRE	A0A0R4ILB0_DANRE	A0A0R4IEH3_DANRE	A0A2R8Q450_DANRE	A0A0R4ICN7_DANRE	A0A0R4IX73_DANRE	A0A2R8Q8F0_DANRE	A0A2R8Q5M4_DANRE	F8W4T6_DANRE	A0A2R8QJ89_DANRE	E7F7V2_DANRE	X1WF60_DANRE	F1Q4T0_DANRE	A0A2R8Q1D4_DANRE	E7F0G8_DANRE
cellular_component	GO:0031012	extracellular matrix	75	369	0.203252	0.489647	0.547523	1	1	APOEB_DANRE	CRA1B_DANRE	COL12_DANRE	B3DLK0_DANRE	A8E7Q1_DANRE	A9JRH0_DANRE	Q5TYP2_DANRE	A8BBJ2_DANRE	F1Q7Y5_DANRE	Q2LDA1_DANRE	E7F9Z1_DANRE	F1QQ56_DANRE	A0A2R8RNY2_DANRE	F1QHS6_DANRE	A0A286YAI0_DANRE	E9QDK3_DANRE	E7FE04_DANRE	Q5SPR1_DANRE	E7FEN5_DANRE	X1WHI6_DANRE	F1RDA9_DANRE	F1QM25_DANRE	A0A2R8QFF2_DANRE	E7FFX0_DANRE	A0A0R4IMA3_DANRE	E7FFQ4_DANRE	F1R2Z7_DANRE	F1QYN1_DANRE	A0A2R8RTK9_DANRE	E7FBX1_DANRE	F1QT86_DANRE	X1WFR7_DANRE	A0A2R8RIW6_DANRE	A0A2R8QKV2_DANRE	H9GYJ3_DANRE	E7F6N6_DANRE	A0A1D5NS53_DANRE	F1R544_DANRE	A0A0R4ISF7_DANRE	F1QSL8_DANRE
cellular_component	GO:0005730	nucleolus	73	348	0.20977	0.564833	0.48257	1	1	PHF2_DANRE	PHF8_DANRE	PLK4_DANRE	NEPRO_DANRE	MDM2_DANRE	SPT2_DANRE	DDX55_DANRE	MAK16_DANRE	ILF3_DANRE	NUSAP_DANRE	CC14A_DANRE	DDX51_DANRE	PYM1_DANRE	NOL11_DANRE	MIDN_DANRE	STPAP_DANRE	WDR75_DANRE	R213A_DANRE	R213B_DANRE	CF089_DANRE	N4BP1_DANRE	DDX11_DANRE	Q6DRI5_DANRE	Q499A8_DANRE	Q7ZVN3_DANRE	A9JR96_DANRE	B0R0S8_DANRE	Q503G0_DANRE	Q6DRE7_DANRE	Q7SZX9_DANRE	F1RC56_DANRE	Q1LUU4_DANRE	F1QF98_DANRE	A0A2R8QP10_DANRE	Q1LY17_DANRE	Q1LV47_DANRE	A0A2R8QV02_DANRE	A0A0R4II47_DANRE	F1QPH6_DANRE	F1QGS3_DANRE
biological_process	GO:0016477	cell migration	73	281	0.259786	0.502845	0.52309	1	1	SE3AA_DANRE	RHDF1_DANRE	SCRIB_DANRE	UBP33_DANRE	TYRO3_DANRE	ZRN1B_DANRE	AMOL2_DANRE	CELF1_DANRE	CTNA2_DANRE	Q5U3T8_DANRE	Q52WY2_DANRE	Q5RHU2_DANRE	B5DE36_DANRE	B3DKP1_DANRE	E7F7Z2_DANRE	F1QAD7_DANRE	B3DIP9_DANRE	Q5TZ42_DANRE	Q4FE55_DANRE	A0A2R8QFW9_DANRE	F1Q6L5_DANRE	F1QN90_DANRE	E9QGC4_DANRE	X1WHJ1_DANRE	F1QG48_DANRE	A0A2R8PYK8_DANRE	E7F9P0_DANRE	F1QPJ1_DANRE	E9QBZ7_DANRE	Q1MTD2_DANRE	F1QBD0_DANRE	A0A2R8QN12_DANRE	E7EYX4_DANRE	A0A2R8Q031_DANRE	E7F4B3_DANRE	F1QYU0_DANRE	X1WBN8_DANRE	F1QWE3_DANRE	E7EXX6_DANRE	A0A2R8QSP1_DANRE
cellular_component	GO:0005912	adherens junction	72	233	0.309013	0.99881	0.00191209	1	0.484	MPP7_DANRE	C85CA_DANRE	SCRIB_DANRE	PAL1A_DANRE	CTNA2_DANRE	E7FAR1_DANRE	F1QGX8_DANRE	Q4ZGL5_DANRE	F1QTT3_DANRE	Q4ZGL0_DANRE	F1QSU4_DANRE	B0BF33_DANRE	Q4ZGK9_DANRE	F1R1G8_DANRE	X1WGN5_DANRE	A0A2R8QNC7_DANRE	A0A2R8QM62_DANRE	Q5RJ81_DANRE	F1QUV8_DANRE	A0A2R8QSE5_DANRE	B8A6A9_DANRE	A0A2R8Q0L0_DANRE	F1Q548_DANRE	U3JA65_DANRE	E7F374_DANRE	F1R4L5_DANRE	A0A2R8QCT0_DANRE	F8W4M8_DANRE	A0A2R8QDB8_DANRE	F1RD94_DANRE	A0A0R4IFF8_DANRE	A0A0R4IQ86_DANRE	A0A2R8Q7L9_DANRE	F1RBK4_DANRE	X1WBG6_DANRE	A0A286Y804_DANRE	A0A2R8QA01_DANRE	F1QU51_DANRE	A0A0R4IJR6_DANRE	A2CGB3_DANRE
cellular_component	GO:0005783	endoplasmic reticulum	72	647	0.111283	4.30889e-05	0.999967	0.006	1	PEF1_DANRE	RN145_DANRE	DDRGK_DANRE	APH1B_DANRE	HACE1_DANRE	POMT2_DANRE	PMGT2_DANRE	CPEB4_DANRE	UFL1_DANRE	VAC14_DANRE	TSP4B_DANRE	AMR1A_DANRE	AMR1B_DANRE	NB5R4_DANRE	NBEL2_DANRE	ELOV6_DANRE	Q7ZW40_DANRE	A3KNJ7_DANRE	Q6EF99_DANRE	X1WG80_DANRE	Q6EFA1_DANRE	B0S6W0_DANRE	Q803R3_DANRE	F1QHT3_DANRE	Q6GMG4_DANRE	E7FCD1_DANRE	E7FFP8_DANRE	Q7T3L3_DANRE	Q6P0U6_DANRE	E7F6G9_DANRE	Q6EFA0_DANRE	F1RBW3_DANRE	F1Q7Y2_DANRE	F1QY61_DANRE	E7FFY0_DANRE	E7FCW9_DANRE	F1R6G6_DANRE	F1Q6C6_DANRE	A0A286YAP4_DANRE	A0A0R4INQ5_DANRE
molecular_function	GO:0001228	DNA-binding transcription activator activity, RNA polymerase II-specific	72	202	0.356436	0.999995	1.07103e-05	1	0.01	ZN219_DANRE	ZN750_DANRE	A0A0R4ILE1_DANRE	Q503Z8_DANRE	E7F8Q2_DANRE	Q6P0F1_DANRE	F1QN94_DANRE	H0WE41_DANRE	B1WB79_DANRE	A4FTT4_DANRE	Q7ZVY3_DANRE	E9QCL9_DANRE	A0A2R8PWG8_DANRE	X1WC64_DANRE	F1QLN2_DANRE	A0A0G2KWR5_DANRE	A0A0R4ICM8_DANRE	F1QBV3_DANRE	A0A2R8Q254_DANRE	A0A2R8QAI8_DANRE	F1RDM3_DANRE	X1WF08_DANRE	A8B8L1_DANRE	H0WE97_DANRE	A0A2R8Q5H5_DANRE	H0WE95_DANRE	F1QS77_DANRE	A0A286YA18_DANRE	A0A2R8QNR2_DANRE	A0A2R8QPD7_DANRE	A0A286YB15_DANRE	A0A0R4IM69_DANRE	E7F8E6_DANRE	Q5TYX1_DANRE	A0A0G2L9Q0_DANRE	B8A5T9_DANRE	X1WCF1_DANRE	I3ITE2_DANRE	A0A2R8RXD0_DANRE	A0A2R8QQD6_DANRE
biological_process	GO:0090630	activation of GTPase activity	71	178	0.398876	0.999999	1.86016e-06	1	0.006	SCRIB_DANRE	RHG29_DANRE	TBC8B_DANRE	A0A286YAC4_DANRE	E7FE99_DANRE	A0A286Y9S9_DANRE	F1QXM3_DANRE	E7FE32_DANRE	F1QJX4_DANRE	A0A0R4IHI1_DANRE	A0A2R8QTS8_DANRE	A0A0R4IHT5_DANRE	A0A0R4IBF6_DANRE	E7FDW4_DANRE	F1R309_DANRE	A0A2R8QEF0_DANRE	A0A2R8QCT2_DANRE	E7F8P9_DANRE	E7F520_DANRE	A0A0R4IRU6_DANRE	F6P7J8_DANRE	A0A0G2KGZ7_DANRE	E7FB23_DANRE	A0A0R4IDU6_DANRE	F1Q602_DANRE	F1R5Z9_DANRE	B0S696_DANRE	B8A5W2_DANRE	E7FA51_DANRE	A0A2R8QKB1_DANRE	F1Q5A4_DANRE	F1QET6_DANRE	F1QE75_DANRE	E7EZ23_DANRE	A0A2R8PXG7_DANRE	A0A2R8RWE1_DANRE	A0A2R8PWT8_DANRE	A0A0G2KWM4_DANRE	F1RA30_DANRE	A0A0R4ICD0_DANRE
cellular_component	GO:0048471	perinuclear region of cytoplasm	69	205	0.336585	0.999982	3.42809e-05	1	0.013	SH3R1_DANRE	ARAID_DANRE	MIB1_DANRE	CPEB4_DANRE	UBP33_DANRE	FBXL5_DANRE	DLLC_DANRE	MYRIP_DANRE	IF2B1_DANRE	F2Z4T4_DANRE	A0A0B4J1A6_DANRE	B7ZVL5_DANRE	B2KTE1_DANRE	Q1LUV5_DANRE	B2KTE4_DANRE	Q7T3L3_DANRE	M1ZML1_DANRE	B2KTE3_DANRE	B3DIT8_DANRE	A0A2R8PZA9_DANRE	A0A0R4IJ71_DANRE	A5WV02_DANRE	Q1L999_DANRE	A0A286YAP4_DANRE	I3ITM6_DANRE	A0A2R8PYV4_DANRE	A0A2R8QM15_DANRE	A0A2R8QKW7_DANRE	E9QF76_DANRE	A0A2R8QAD7_DANRE	A0A2R8QR17_DANRE	A0A0R4INC4_DANRE	A0A0R4IMH2_DANRE	A0A2R8QBS2_DANRE	E9QCV2_DANRE	A0A0G2L5A2_DANRE	A0A2R8QEG3_DANRE	A0A2R8Q8F0_DANRE	A0A2R8Q5M4_DANRE	A0A2R8QLG6_DANRE
molecular_function	GO:0043565	sequence-specific DNA binding	69	269	0.256506	1	4.53034e-118	1	0	HSF4_DANRE	EGR1_DANRE	FOXN4_DANRE	KLF1_DANRE	PAX6_DANRE	ETV4_DANRE	PO5F1_DANRE	PO4F3_DANRE	SOX2_DANRE	TBX5A_DANRE	TBXTA_DANRE	PAX2A_DANRE	HXB1A_DANRE	DLX3B_DANRE	B0S6T1_DANRE	Q501S1_DANRE	Q9I9E8_DANRE	Q68EH3_DANRE	A5JNG8_DANRE	F1QPC8_DANRE	F1RD02_DANRE	Q30JB6_DANRE	A0A1D5NSQ7_DANRE	Q90VY7_DANRE	Q1LVI0_DANRE	A0A2R8QIV0_DANRE	F1QK52_DANRE	E7EZL9_DANRE	A0A2R8RXZ5_DANRE	A0A0R4J6S2_DANRE	A0A0R4INF0_DANRE	E7F138_DANRE	E7FDK6_DANRE	E7F6E9_DANRE	A0A0R4IN87_DANRE	B0VJZ9_DANRE	Q1LV27_DANRE	F8W4Q7_DANRE	F1QVQ9_DANRE	F1QUH0_DANRE
biological_process	GO:0033674	positive regulation of kinase activity	69	138	0.5	0.999999	1.65865e-06	1	0.006	FGR1A_DANRE	TYRO3_DANRE	TIE2_DANRE	VAC14_DANRE	VGFR3_DANRE	F1R5S1_DANRE	B3DKP1_DANRE	D0FH56_DANRE	Q5VSJ4_DANRE	A0A0R4ILA5_DANRE	F8W3W7_DANRE	F1R376_DANRE	A0A2R8QI76_DANRE	F1QKJ0_DANRE	A0A2R8PYK8_DANRE	E7FAI5_DANRE	F1R5P2_DANRE	A0A2R8Q844_DANRE	A8E7C6_DANRE	E7FD22_DANRE	F6NI62_DANRE	Q1LWJ4_DANRE	A0A2R8QHE8_DANRE	F1QDE6_DANRE	E7FFT8_DANRE	F1QBU7_DANRE	F1QBD0_DANRE	F1QP50_DANRE	B8JLJ1_DANRE	E7EYX4_DANRE	G1K2P2_DANRE	F8W3R9_DANRE	A0A0A0MPK4_DANRE	F1QNX5_DANRE	F1QWE3_DANRE	A0A2R8RS29_DANRE	A0A2R8QQ09_DANRE	F1QVU0_DANRE	A0A2R8QED1_DANRE	F1Q7S3_DANRE
molecular_function	GO:0005516	calmodulin binding	68	239	0.284519	0.989434	0.0154591	1	1	INVS_DANRE	CAM1B_DANRE	RGRF2_DANRE	F1QNK9_DANRE	F2Z4T4_DANRE	B0S6F4_DANRE	Q6DHN7_DANRE	Q1LY45_DANRE	Q4F876_DANRE	A2BIN8_DANRE	Q7T303_DANRE	Q502K8_DANRE	E7FAT2_DANRE	Q32PU2_DANRE	F1QVH9_DANRE	F1QGA8_DANRE	A0A0R4ISS8_DANRE	F1RB62_DANRE	F1QCK4_DANRE	F8W5K5_DANRE	A0A0R4IKT8_DANRE	A0A2R8PWZ0_DANRE	A0A0R4IGU0_DANRE	F1QEX9_DANRE	E7F624_DANRE	F1R275_DANRE	F1QW20_DANRE	E7F693_DANRE	A0A2R8QBS2_DANRE	Q5RGQ4_DANRE	F1QJV2_DANRE	A0A2R8RPV5_DANRE	E7F3U0_DANRE	A0A0R4IC31_DANRE	A0A2R8Q3V4_DANRE	A0A2R8QGU6_DANRE	A0A2R8RJ37_DANRE	A0A0R4INU5_DANRE	B8A668_DANRE	Q1LUF1_DANRE
biological_process	GO:0051301	cell division	68	234	0.290598	0.890995	0.130207	1	1	MCMBP_DANRE	CC14A_DANRE	ERC6L_DANRE	FA83D_DANRE	CEP63_DANRE	BECN1_DANRE	PDS5A_DANRE	BABA1_DANRE	FIGN_DANRE	CD123_DANRE	SPC24_DANRE	NUF2_DANRE	UBP16_DANRE	RFP4A_DANRE	RFIP3_DANRE	UBP37_DANRE	ARP8_DANRE	NEK8_DANRE	NDC80_DANRE	CLAP2_DANRE	Q7ZVN3_DANRE	Q7T3D4_DANRE	Q6TNS1_DANRE	A0A2R8Q9M3_DANRE	A2CEF0_DANRE	Q08CD9_DANRE	A2RUX1_DANRE	F1R1N7_DANRE	Q7ZUP9_DANRE	A2BG39_DANRE	Q08CT1_DANRE	D2XZ47_DANRE	A1L231_DANRE	E7FCY1_DANRE	A8WFZ3_DANRE	F1QJY8_DANRE	H9KUW6_DANRE	A0A0R4IQR0_DANRE	A0A2R8PZ20_DANRE	A0A2R8Q472_DANRE
cellular_component	GO:0014069	postsynaptic density	67	164	0.408537	0.999873	0.000224479	1	0.085	DLGP1_DANRE	INSY1_DANRE	CPEB4_DANRE	SCRIB_DANRE	NSMF_DANRE	Q1LUP1_DANRE	Q6GMH1_DANRE	E7F3J0_DANRE	Q1RLV0_DANRE	A0A2R8Q385_DANRE	F6NTM9_DANRE	F1QJ05_DANRE	A0A2R8QML6_DANRE	A0A286YAV6_DANRE	F1QCQ3_DANRE	A0A286Y962_DANRE	A0A2R8PUN1_DANRE	A0A0R4IVJ3_DANRE	A0A2R8QI45_DANRE	A0A2R8RL55_DANRE	A0A286Y9M1_DANRE	A0A2R8QSN4_DANRE	E7FDI0_DANRE	A0A2R8PX08_DANRE	A0A2R8QDV8_DANRE	F1RBK4_DANRE	A0A286Y804_DANRE	B8JIC5_DANRE	A0A2R8RHL8_DANRE	E7EXG2_DANRE	E7FF64_DANRE	F1Q6G4_DANRE	A0A2R8QBF8_DANRE	A0A286Y931_DANRE	A0A0R4IJ99_DANRE	A0A2R8Q5Y8_DANRE	F1R306_DANRE	F1QA84_DANRE	F1QYG8_DANRE	F8W4G8_DANRE
biological_process	GO:0006915	apoptotic process	66	270	0.244444	1.30378e-06	0.999999	0	1	MDM2_DANRE	RN152_DANRE	ERCC3_DANRE	TXB1A_DANRE	TCHP_DANRE	KANK2_DANRE	F1QDN4_DANRE	E7EXV8_DANRE	Q1LUU4_DANRE	B0S576_DANRE	F1Q828_DANRE	A0A2R8QRN5_DANRE	A0A0R4IKR8_DANRE	X1WBM9_DANRE	E7FBJ6_DANRE	A0A2R8Q0F5_DANRE	A0A2R8QF37_DANRE	A0A2R8QDZ7_DANRE	F1RCH2_DANRE	X1WGL1_DANRE	F1R6L2_DANRE	X1WF03_DANRE	A0A2R8QDI1_DANRE	F1QIQ2_DANRE	A0A2R8RI36_DANRE	A0A2R8Q559_DANRE	E7F336_DANRE	A0A0R4ILJ7_DANRE	A0A0R4ITB0_DANRE	A0A2R8RLP2_DANRE	A0A0R4IT02_DANRE	F1R8W0_DANRE	A0A2R8Q6A5_DANRE	A0A2R8RNP3_DANRE	A0A2R8Q192_DANRE	A0A286YA84_DANRE	F1Q7E9_DANRE	A0A0R4IW08_DANRE	E7FGW0_DANRE	A0A0R4ISC3_DANRE
molecular_function	GO:0004714	transmembrane receptor protein tyrosine kinase activity	66	146	0.452055	1	4.2566e-09	1	0	FGR1A_DANRE	TYRO3_DANRE	TIE2_DANRE	VGFR3_DANRE	B3DGN7_DANRE	F1R5S1_DANRE	B3DKP1_DANRE	D0FH56_DANRE	B3DJR6_DANRE	Q5VSJ4_DANRE	A0A0R4ILA5_DANRE	F8W3W7_DANRE	F1R376_DANRE	A0A2R8QI76_DANRE	F1QKJ0_DANRE	A0A2R8PYK8_DANRE	F1R5P2_DANRE	A0A2R8Q844_DANRE	A8E7C6_DANRE	E7FD22_DANRE	F6NI62_DANRE	Q1LWJ4_DANRE	A0A2R8QHE8_DANRE	F1QDE6_DANRE	E7FFT8_DANRE	F8W2R6_DANRE	F1QBU7_DANRE	F1QBD0_DANRE	F1QP50_DANRE	B8JLJ1_DANRE	E7EYX4_DANRE	G1K2P2_DANRE	F8W3R9_DANRE	A0A0A0MPK4_DANRE	F1QNX5_DANRE	F1QWE3_DANRE	A0A2R8RS29_DANRE	A0A2R8QQ09_DANRE	F1QVU0_DANRE	A0A2R8QED1_DANRE
molecular_function	GO:0003924	GTPase activity	65	603	0.107794	1.78312e-15	1	0	1	GTPB3_DANRE	MIRO1_DANRE	MXB_DANRE	MXA_DANRE	MXE_DANRE	Q498P3_DANRE	Q5U3T8_DANRE	Q52WY2_DANRE	Q6IQ78_DANRE	F1R372_DANRE	F6NJS4_DANRE	B8A4L3_DANRE	E7F7Z2_DANRE	A0A077CZD0_DANRE	A0A0R4IXR0_DANRE	A0A2R8RX84_DANRE	F1Q694_DANRE	Q5RJ11_DANRE	Q1LXP8_DANRE	A0A077D3Q6_DANRE	A0A2R8RIU7_DANRE	A0A2R8Q554_DANRE	B8A6H1_DANRE	E7EYJ1_DANRE	A2CEM4_DANRE	F1QXC3_DANRE	E9QCB3_DANRE	A0A2R8Q0F5_DANRE	A0A2R8Q469_DANRE	F6PA68_DANRE	A2CEM2_DANRE	E9QH15_DANRE	A0A0R4ILB0_DANRE	A0A0R4IQI6_DANRE	A0A0G2KQA6_DANRE	A0A2R8Q450_DANRE	A0A0R4ILJ7_DANRE	B8JKI4_DANRE	A0A2R8RKH9_DANRE	A0A2R8RQN4_DANRE
cellular_component	GO:0005925	focal adhesion	65	149	0.436242	1	2.29256e-09	1	0	TIE2_DANRE	AMR1A_DANRE	AMR1B_DANRE	Q6NYJ1_DANRE	A0A2R8QN78_DANRE	B5DE36_DANRE	F1QSX8_DANRE	B3DIP9_DANRE	A0A0R4IHI1_DANRE	A0A2R8QFW9_DANRE	A0A2R8PZA9_DANRE	A0A0R4IJ71_DANRE	A5WV02_DANRE	A0A0R4IW85_DANRE	A0A0R4IIA7_DANRE	A0A2R8QBL2_DANRE	A0A0R4IDZ8_DANRE	B0UXW1_DANRE	A0A2R8RLV5_DANRE	A0A2R8PXH2_DANRE	A0A0R4IRU6_DANRE	A0A2R8QGP7_DANRE	F1QUA3_DANRE	A0A2R8QU03_DANRE	A0A2R8QNV1_DANRE	A0A2R8QKW7_DANRE	A0A2R8QR17_DANRE	F1QI09_DANRE	A0A0R4INC4_DANRE	A0A2R8QNA6_DANRE	E9QCV2_DANRE	B8A435_DANRE	F1QU06_DANRE	F1Q9A0_DANRE	A0A2R8QEG3_DANRE	A0A2R8QLG6_DANRE	A0A2R8PVX9_DANRE	F1R1J6_DANRE	A0A2R8PWS1_DANRE	A0A2R8QEM1_DANRE
biological_process	GO:0007268	chemical synaptic transmission	64	399	0.160401	0.109018	0.905762	1	1	DLGP1_DANRE	CEP89_DANRE	DLG1_DANRE	Q08CV1_DANRE	Q0PJT8_DANRE	F8W634_DANRE	E9QC71_DANRE	Q568M9_DANRE	B3DH97_DANRE	A0A2R8S0F4_DANRE	E7F278_DANRE	F6PDA4_DANRE	E7F6K9_DANRE	A0A2R8RMZ0_DANRE	A0A0R4INP7_DANRE	A0A2R8PYA5_DANRE	T1ECU0_DANRE	A0A0R4IK22_DANRE	A0A1D5NSQ0_DANRE	A0A0R4IZI1_DANRE	E7EYT4_DANRE	X1WC43_DANRE	E7FGL9_DANRE	A8B6E8_DANRE	E9QHL0_DANRE	B8JHQ2_DANRE	F1RAQ0_DANRE	A0A286Y9K8_DANRE	Q5RHB1_DANRE	A0A2R8QNR1_DANRE	A0A2R9YJM9_DANRE	E9QDB8_DANRE	F1Q9E4_DANRE	F1R5G4_DANRE	A0A140LGX8_DANRE	F1QHR2_DANRE	A0A2R8Q2L9_DANRE	E7EYV5_DANRE	E9QF66_DANRE	A0A0R4IFE8_DANRE
biological_process	GO:0000226	microtubule cytoskeleton organization	64	254	0.251969	1	2.66993e-11	1	0	CC14A_DANRE	CAM1B_DANRE	SIK3_DANRE	TTLL6_DANRE	CLAP2_DANRE	Q7ZVN3_DANRE	Q1L8E6_DANRE	A0A2R8QI85_DANRE	E7F9D4_DANRE	B8A574_DANRE	Q6IQ78_DANRE	X1WDB0_DANRE	Q08CG7_DANRE	A0A140LH51_DANRE	A0A0R4J7C3_DANRE	B2ZZ14_DANRE	F1Q828_DANRE	A0A2R8QKN0_DANRE	A0A140LFX2_DANRE	A0A286Y8P6_DANRE	A0A2R8PY65_DANRE	A0A140LGA6_DANRE	A0A2R8QJ64_DANRE	E7FGK1_DANRE	A8WHM7_DANRE	A0A0R4IPE8_DANRE	E7F624_DANRE	A0A2R8Q5N9_DANRE	A0A286Y815_DANRE	F1QPM0_DANRE	A5PM86_DANRE	A0A1D5NT13_DANRE	G1K2T5_DANRE	E9QHU0_DANRE	F1R380_DANRE	E7F0V5_DANRE	A0A2R8QG93_DANRE	A0A0R4IXD9_DANRE	E7F887_DANRE	A0A2R8RPV5_DANRE
biological_process	GO:0045892	negative regulation of transcription, DNA-templated	63	245	0.257143	0.999124	0.00117368	1	0.883	PHC2_DANRE	RUVB2_DANRE	REST_DANRE	PNX_DANRE	NFIL3_DANRE	ZN703_DANRE	CHD8_DANRE	JARD2_DANRE	E2F8_DANRE	A2CG09_DANRE	F1RDU3_DANRE	A4QN37_DANRE	E7FEN0_DANRE	B2KTE5_DANRE	E7FFR7_DANRE	Q1LUU4_DANRE	Q6DHD0_DANRE	Q7SYM1_DANRE	Q7ZU53_DANRE	Q1LVI5_DANRE	F6P8Y5_DANRE	F1QXQ3_DANRE	F1QTE0_DANRE	A0A2R8QAV7_DANRE	F1R1X1_DANRE	B0R0X6_DANRE	F6P2R0_DANRE	F6NXN2_DANRE	F1QTJ1_DANRE	A0A286Y9G2_DANRE	Q1MT18_DANRE	F1QKD5_DANRE	F1R4F8_DANRE	E7F336_DANRE	A0A2R9YJG4_DANRE	A0A2R8Q2A2_DANRE	A5WWF5_DANRE	F6NPZ8_DANRE	A0A0R4IFW6_DANRE	A0A2R8RRU0_DANRE
cellular_component	GO:0000139	Golgi membrane	62	433	0.143187	9.36883e-05	0.999939	0.009	1	TSN36_DANRE	GOGA5_DANRE	HACE1_DANRE	COG4_DANRE	COPB_DANRE	S39AD_DANRE	RHDF1_DANRE	SWET1_DANRE	SRBP2_DANRE	RIC1_DANRE	CF089_DANRE	CHSTB_DANRE	A8WG81_DANRE	Q7ZW40_DANRE	A9JRX6_DANRE	B0S5J2_DANRE	E7F995_DANRE	B8A5X2_DANRE	E7F0G2_DANRE	Q7SYK6_DANRE	Q6GMH1_DANRE	Q567Y3_DANRE	Q502M2_DANRE	E7EYL2_DANRE	F1REP6_DANRE	E7F825_DANRE	F1Q8M3_DANRE	B8A4N9_DANRE	A0A0R4IGF6_DANRE	E9QGX8_DANRE	A0A2R8RVF1_DANRE	A0A0G2L9G1_DANRE	F1R860_DANRE	X1WEM9_DANRE	F1RBH5_DANRE	A0A2R8RUW2_DANRE	E7EXG2_DANRE	F1QIQ6_DANRE	B8JLQ4_DANRE	E7F2J5_DANRE
cellular_component	GO:0005814	centriole	62	110	0.563636	1	3.64992e-15	1	0	PLK4_DANRE	MDM1_DANRE	SAS6_DANRE	STIL_DANRE	CP135_DANRE	CEP89_DANRE	CEP63_DANRE	PPR35_DANRE	TALD3_DANRE	OFD1_DANRE	SDCG8_DANRE	POC1B_DANRE	CE162_DANRE	DZI1L_DANRE	DZIP1_DANRE	CEP83_DANRE	Q6IQ78_DANRE	B0UYB0_DANRE	F1QHQ9_DANRE	F1QX00_DANRE	E7FCY1_DANRE	A0A0R4I9S3_DANRE	E7F5N7_DANRE	I3ISQ9_DANRE	E9QDX2_DANRE	F1RB74_DANRE	F1QZQ0_DANRE	A0A2R8RN40_DANRE	A0A0R4IEX1_DANRE	F1R7N8_DANRE	F1QVN7_DANRE	F1QF92_DANRE	A0A0R4INC9_DANRE	A2BE85_DANRE	A0A2R8RY83_DANRE	E9QDJ2_DANRE	F1QAL1_DANRE	A0A2R8QRB2_DANRE	A0A2R8QKU3_DANRE	A0A2R8QPP2_DANRE
cellular_component	GO:0005923	bicellular tight junction	61	168	0.363095	0.999994	1.293e-05	1	0.006	MPP7_DANRE	JAM2A_DANRE	C85CA_DANRE	PAL1A_DANRE	AMOL2_DANRE	CING_DANRE	Q1LXN3_DANRE	Q6TNS1_DANRE	Q1LVF4_DANRE	A2RUX1_DANRE	E7F8Q6_DANRE	Q08BB8_DANRE	A0A2R8QB05_DANRE	A0A2R8RHW5_DANRE	B0UXH8_DANRE	F6PEN0_DANRE	A0A2R8PZH5_DANRE	R4GDY5_DANRE	F1R4L5_DANRE	A0A2R8QCT0_DANRE	F1RD94_DANRE	A0A2R8QA68_DANRE	A0A2R8Q3Q7_DANRE	A0A2R8Q7L9_DANRE	X1WBG6_DANRE	A0A2R8PY22_DANRE	A0A2R8QA01_DANRE	E7FBB9_DANRE	A0A0R4IFC6_DANRE	A2CGB3_DANRE	A0A286YB86_DANRE	A0A2R8RR49_DANRE	A0A2R8QMK9_DANRE	A0A0G2L7R9_DANRE	F1QWK3_DANRE	F1QE46_DANRE	E7FCE7_DANRE	A0A0R4IGT8_DANRE	A5WW50_DANRE	E7F2W2_DANRE
biological_process	GO:0007166	cell surface receptor signaling pathway	61	220	0.277273	0.993671	0.0071858	1	1	RANB9_DANRE	AGRA3_DANRE	AGRV1_DANRE	AGRA2_DANRE	AGRG6_DANRE	E7FB43_DANRE	A0A140LGT8_DANRE	E7F1D8_DANRE	A0A140LFU5_DANRE	F1R4K2_DANRE	A0A0R4IIA2_DANRE	F1QB00_DANRE	A0A140LFS3_DANRE	F1Q5B6_DANRE	A0A2R8PX08_DANRE	F1Q6P9_DANRE	A0A140LFQ2_DANRE	A0A0G2KU97_DANRE	R4GDT3_DANRE	E7F4F2_DANRE	M9MMA9_DANRE	E7F1G3_DANRE	A0A2R8RJZ8_DANRE	R4GEI0_DANRE	A0A0R4IZE8_DANRE	A0A0G2KI21_DANRE	A0A0R4IB29_DANRE	R4GE33_DANRE	Q5RHM6_DANRE	F1QT64_DANRE	A0A0R4IPM4_DANRE	A0A2R8RNZ0_DANRE	F1QX89_DANRE	F1QBS8_DANRE	F1Q776_DANRE	E7FF79_DANRE	A0A140LH70_DANRE	A0A0G2KPF7_DANRE	Q5RHM3_DANRE	A0A0H2UKW5_DANRE
biological_process	GO:0007368	determination of left/right symmetry	61	165	0.369697	0.999234	0.00110587	1	0.874	KIF7_DANRE	DAAF1_DANRE	GP161_DANRE	MIB1_DANRE	CCD39_DANRE	CCD40_DANRE	GPR22_DANRE	BBS2_DANRE	RFX2_DANRE	NOTC1_DANRE	ZN703_DANRE	TBXTA_DANRE	CELF1_DANRE	DZIP1_DANRE	B0UYB0_DANRE	A1A601_DANRE	F1QBZ9_DANRE	A8WFS2_DANRE	A4FTT4_DANRE	Q9W6I6_DANRE	Q6DG05_DANRE	E9QDJ5_DANRE	F1Q6W8_DANRE	A0A2R8RI11_DANRE	E7EXH4_DANRE	F1Q7Y4_DANRE	B8A5N9_DANRE	B8JL25_DANRE	F1RDZ7_DANRE	F1QVN7_DANRE	F6NVB1_DANRE	B0V0H4_DANRE	F8W4A9_DANRE	F1QX08_DANRE	X1WH62_DANRE	A2BG35_DANRE	A0A2R8QRB2_DANRE	A2BFC8_DANRE	A0A2R8QUN0_DANRE	F1QPD8_DANRE
cellular_component	GO:0009897	external side of plasma membrane	60	423	0.141844	2.3411e-05	0.999987	0.002	1	SCAR5_DANRE	AGRA3_DANRE	F8W3Q0_DANRE	A8WH88_DANRE	B3DI57_DANRE	E5DV48_DANRE	B8JJU1_DANRE	Q08BD7_DANRE	A9JRH6_DANRE	A8E7F4_DANRE	A8WH93_DANRE	Q6GMG0_DANRE	A0A0R4IE17_DANRE	A8WH90_DANRE	B0R0P3_DANRE	Q7YP14_DANRE	A0A2R8QEU4_DANRE	F1RA13_DANRE	A0A0G2KE94_DANRE	F1QMA9_DANRE	B0R0P2_DANRE	A0A0R4IC48_DANRE	F1QA53_DANRE	E9QBZ7_DANRE	A0A0R4IJL4_DANRE	F1Q6R9_DANRE	E9QC63_DANRE	M9MMG2_DANRE	F1RD89_DANRE	A0A2R8QLX1_DANRE	A0A2R8RVG8_DANRE	A0A0R4IT02_DANRE	F1R904_DANRE	M9MMF8_DANRE	B0S6A6_DANRE	A0A2R8S073_DANRE	F6NYV8_DANRE	F1QDU1_DANRE	F1R4T0_DANRE	A8WH84_DANRE
molecular_function	GO:0003730	mRNA 3'-UTR binding	60	147	0.408163	1	5.96321e-07	1	0	CPEB4_DANRE	PABPA_DANRE	STPAP_DANRE	CELF1_DANRE	CELF2_DANRE	IF2B1_DANRE	Q1LV60_DANRE	Q05AJ1_DANRE	Q6P124_DANRE	B3DJY4_DANRE	Q6P2A9_DANRE	Q9PTK4_DANRE	B8K0D5_DANRE	A0A0R4IVY2_DANRE	Q6TGY6_DANRE	A0A0R4IWC9_DANRE	Q802Y1_DANRE	F1QCY1_DANRE	A8DZI0_DANRE	Q6GQM6_DANRE	A8E5B6_DANRE	Q802Z9_DANRE	F1QJB8_DANRE	F1R3N8_DANRE	A0A2R8PYS4_DANRE	A0A0R4IWL6_DANRE	A0A0R4IAW9_DANRE	A0A2R8QKK6_DANRE	A0A2R8RHU1_DANRE	A0A2R8QTX4_DANRE	A0A2R8Q8A4_DANRE	A0A2R8Q8X4_DANRE	A0A2R8QDJ4_DANRE	A0A0G2KYC0_DANRE	A0A0R4IY44_DANRE	A0A2R8QLQ0_DANRE	F1R4Q6_DANRE	E7F112_DANRE	A0A2R8RHK1_DANRE	F8W4G8_DANRE
biological_process	GO:0001756	somitogenesis	59	162	0.364198	0.999926	0.000139584	1	0.221	SPT6H_DANRE	MIB1_DANRE	KIF22_DANRE	NOTC1_DANRE	TBX6_DANRE	TBXTA_DANRE	DLLC_DANRE	B0S6T1_DANRE	F1QGX8_DANRE	Q4ZGL5_DANRE	Q6EF99_DANRE	Q6EFA1_DANRE	F1Q6T9_DANRE	B3DJF0_DANRE	Q4ZGL0_DANRE	Q5I2A9_DANRE	F1Q9Z5_DANRE	Q803K8_DANRE	Q6YBS2_DANRE	Q4ZGK9_DANRE	Q6EFA0_DANRE	A4FTT4_DANRE	F1QY45_DANRE	F1R1G8_DANRE	A0A2R8QM62_DANRE	A0A2R8QMZ5_DANRE	A0A2R8RLV5_DANRE	A0A286YBL8_DANRE	A0A2R8QIE4_DANRE	Q1LXH4_DANRE	F6P5J8_DANRE	B8JL25_DANRE	A0A2R8QB37_DANRE	F1QU51_DANRE	Q1LXH6_DANRE	Q1LXH3_DANRE	X1WGE3_DANRE	B8JMD0_DANRE	A2CEW3_DANRE	F8W4G8_DANRE
molecular_function	GO:0004672	protein kinase activity	58	283	0.204947	0.0727755	0.935105	1	1	SPEG_DANRE	E9QHI3_DANRE	Q6NYW1_DANRE	E7F1L0_DANRE	A8WFS2_DANRE	Q1L881_DANRE	F8W392_DANRE	F1R8K2_DANRE	A0A0R4IKJ5_DANRE	T1ECV2_DANRE	A0A2R8QPX6_DANRE	A0A1N8QGS5_DANRE	A0A0R4IV01_DANRE	F1QDH9_DANRE	E7FAI5_DANRE	B8JI14_DANRE	A0A2R8PWM3_DANRE	F1QZQ0_DANRE	A0A2R8PYK0_DANRE	A0A2R8Q2N6_DANRE	A0A2R8PY87_DANRE	Q5RI03_DANRE	F1R7N8_DANRE	A0A2R8PYI7_DANRE	A0A0G2KY41_DANRE	E9QI16_DANRE	F1QB18_DANRE	A0A286YBM4_DANRE	F6NJB9_DANRE	E7FEY1_DANRE	F1R1P5_DANRE	A0A0R4IK63_DANRE	F1R0T3_DANRE	A0A0R4IN78_DANRE	E7FCQ2_DANRE	E7EZL0_DANRE	A2RRV7_DANRE	B1H1M4_DANRE	E7F2L3_DANRE	A0A2R8QIK3_DANRE
biological_process	GO:0007417	central nervous system development	58	190	0.305263	0.999623	0.000478404	1	0.55	TPP1_DANRE	MIB1_DANRE	EMX1_DANRE	S7A6O_DANRE	TBX6L_DANRE	ZN143_DANRE	TRIO_DANRE	IKKA_DANRE	AGRA2_DANRE	Q5QHS3_DANRE	B0R024_DANRE	B3DKL9_DANRE	Q6VUB8_DANRE	Q90264_DANRE	Q6PWU7_DANRE	A0A2R8Q385_DANRE	A0A0R4IVJ3_DANRE	F1R7N7_DANRE	F1QKJ0_DANRE	A0A2R8QQB8_DANRE	F1Q5T5_DANRE	F1Q551_DANRE	A0A0R4IA95_DANRE	A0A2R8QJG1_DANRE	A0A286YBQ8_DANRE	A0A0R4ICW0_DANRE	A0A0R4IF59_DANRE	B8A5N9_DANRE	A0A2R8RHL8_DANRE	B8JKS6_DANRE	E7F0X6_DANRE	A0A0R4IQK3_DANRE	A0A0R4ILR3_DANRE	A0A0R4I9W4_DANRE	A0A0R4IPG9_DANRE	A0A0R4IJG0_DANRE	F1QEZ8_DANRE	A0A2R8QHY4_DANRE	A0A0R4IU05_DANRE	A0A2R8QK78_DANRE
biological_process	GO:0042127	regulation of cell population proliferation	58	121	0.479339	0.858024	0.165426	1	1	TPC14_DANRE	AP2E_DANRE	Q6NZT5_DANRE	Q6NYI3_DANRE	A4QNT9_DANRE	Q6VUB8_DANRE	Q4V9B2_DANRE	Q8AW20_DANRE	O93599_DANRE	Q6NV46_DANRE	E7F3J0_DANRE	A0A1S6L757_DANRE	A0A0R4IGF2_DANRE	A0A2R8S045_DANRE	A0A2R8QI76_DANRE	A0A2R8QNW3_DANRE	B0S790_DANRE	F8W3X1_DANRE	A0A2R8RWD9_DANRE	F1QBU7_DANRE	A0A2R8PYV4_DANRE	A0A2R8QAD7_DANRE	E7FBV9_DANRE	F8W3R9_DANRE	A0A2R8RSI4_DANRE	A0A0R4IT02_DANRE	A0A286Y8U3_DANRE	F1QVU0_DANRE	A0A2R8Q8F0_DANRE	A0A2R8Q5M4_DANRE	A0A2R8QED1_DANRE	F1R3F8_DANRE	A0A0R4IGJ6_DANRE	Q6P975_DANRE	Q68SP3_DANRE	A0A2R8S019_DANRE	F8W4A6_DANRE	A0A2R8QNK8_DANRE	A0A2R8QGM1_DANRE	A0A0R4IBW6_DANRE
cellular_component	GO:0043231	intracellular membrane-bounded organelle	57	394	0.14467	1	2.60979e-20	1	0	PDXD1_DANRE	ARAID_DANRE	AMR1A_DANRE	AMR1B_DANRE	F1QNV1_DANRE	Q66I26_DANRE	A2CEI3_DANRE	A0JMM3_DANRE	A0A0R4IQ46_DANRE	E7F798_DANRE	E7FFY0_DANRE	B0S5M3_DANRE	F1R2E5_DANRE	A0A2R8RJG6_DANRE	A0A2R8QL19_DANRE	A0A0R4IUM5_DANRE	A0A2R8RIK5_DANRE	A0A0R4IH69_DANRE	A0A2R8QH09_DANRE	E9QDU3_DANRE	E7F5T7_DANRE	F1QFM6_DANRE	A0A2R8RHT0_DANRE	F1QNP3_DANRE	F1Q7I7_DANRE	A0A0N5E8A0_DANRE	A0A2R8QKH3_DANRE	A0A140LGW1_DANRE	A0A0G2KQ55_DANRE	A0A2R8QKG1_DANRE	E9QE50_DANRE	F1QG86_DANRE	E7F3A1_DANRE	A0A2R8Q4F0_DANRE	E7F2M8_DANRE	F1QIG8_DANRE	B0S523_DANRE	B8A446_DANRE	F1Q793_DANRE	A0A2R8QJU4_DANRE
biological_process	GO:0048703	embryonic viscerocranium morphogenesis	57	186	0.306452	0.984573	0.02298	1	1	PHF8_DANRE	DLX5A_DANRE	DLX2A_DANRE	EGR1_DANRE	NIPLA_DANRE	WNT5B_DANRE	MED12_DANRE	NBAS_DANRE	DLX3B_DANRE	DLX1A_DANRE	DLX4B_DANRE	A9JR96_DANRE	Q6DRM9_DANRE	A2CG09_DANRE	E7F4D0_DANRE	F1R405_DANRE	Q5I2A9_DANRE	B6IDE3_DANRE	A0A1X9RK86_DANRE	A0A1X9RK88_DANRE	A0A1X9RK87_DANRE	Q9I9I2_DANRE	B7ZUU3_DANRE	F1R3T7_DANRE	F1Q633_DANRE	E7FET3_DANRE	A0A0R4IDZ8_DANRE	A0A2R8QCL7_DANRE	A0A0R4I9V4_DANRE	B7ZDE9_DANRE	A0A0R4ICW0_DANRE	A0A0R4IF59_DANRE	F1QGA1_DANRE	A0A2R8QFB7_DANRE	F1Q597_DANRE	A0A0A0MPN0_DANRE	B8A5T9_DANRE	A8WIP5_DANRE	A0A2R8Q1V0_DANRE	Q5U7N6_DANRE
cellular_component	GO:0030027	lamellipodium	57	128	0.445312	1	5.75092e-09	1	0	SH3R1_DANRE	PHR4A_DANRE	SHP2A_DANRE	SCRIB_DANRE	PHR4B_DANRE	NAV3_DANRE	IF2B1_DANRE	A0A0B4J1A6_DANRE	Q5RHU2_DANRE	F1R1Q1_DANRE	B8JHQ5_DANRE	Q6GMH1_DANRE	Q1JPU9_DANRE	E7F8Q6_DANRE	B0V218_DANRE	Q5TZ42_DANRE	F1QVU3_DANRE	B3DIT8_DANRE	A0A0R4IWX6_DANRE	I3ISX7_DANRE	B0V219_DANRE	F1RE63_DANRE	A0A286YAJ7_DANRE	A0A2R8PVT4_DANRE	A0A140LFZ9_DANRE	A0A0R4IPH0_DANRE	F1Q932_DANRE	I3ITI8_DANRE	A0A0R4ILA7_DANRE	I3ITM8_DANRE	A0A2R8QEN6_DANRE	E7EXG2_DANRE	F1RAW5_DANRE	I3IRV8_DANRE	A0A2R8Q1F3_DANRE	F8W5F0_DANRE	G1K2M1_DANRE	A8E7L4_DANRE	F1QCK5_DANRE	A0A140LFT4_DANRE
biological_process	GO:0043547	positive regulation of GTPase activity	57	176	0.323864	1	1.83572e-07	1	0	SEM4E_DANRE	MY9AB_DANRE	A9ZPD8_DANRE	B3DI91_DANRE	A0A2R8Q8N1_DANRE	A0A2R8QF27_DANRE	A0A2R8PWF3_DANRE	A0A2R8Q0L0_DANRE	F1QBI5_DANRE	A0A0A0MPV6_DANRE	A0A2R8PYV4_DANRE	X1WBR0_DANRE	A0A286YB67_DANRE	A0A2R8RI29_DANRE	A0A2R8QAD7_DANRE	E7EYV1_DANRE	A0A0G2KFX5_DANRE	A0A2R8Q349_DANRE	A0A140LH27_DANRE	A0A2R8QAD2_DANRE	E7FFF8_DANRE	F1R073_DANRE	X1WFB2_DANRE	X1WEX8_DANRE	A0A2R8Q8F0_DANRE	A0A2R8Q5M4_DANRE	A0A2R8QI48_DANRE	E7EXI3_DANRE	A0A0G2KHX4_DANRE	A0A286Y892_DANRE	A0A2R8QSV2_DANRE	A0A2R8QQA3_DANRE	A0A2R8QNK8_DANRE	F1QYT8_DANRE	A0A2R8QGM1_DANRE	A0A0R4IBW6_DANRE	E9QI83_DANRE	F1QPF1_DANRE	B8JK90_DANRE	E9QJ00_DANRE
molecular_function	GO:0004842	ubiquitin-protein transferase activity	56	197	0.284264	0.236893	0.788535	1	1	RN152_DANRE	MIB1_DANRE	HACE1_DANRE	NSE1_DANRE	RNF8_DANRE	MYLIB_DANRE	TRAF6_DANRE	R213A_DANRE	R213B_DANRE	Q6IQH8_DANRE	F1R926_DANRE	Q8JFV5_DANRE	F1R5N4_DANRE	A0A0R4IHW3_DANRE	F1QXU6_DANRE	F1QCS4_DANRE	A8E7M3_DANRE	A0A0G2L163_DANRE	B0S649_DANRE	B8JLD4_DANRE	F1Q529_DANRE	B0S645_DANRE	A0A2R8QHT3_DANRE	F8W5Q6_DANRE	B8JHS6_DANRE	A0A2U3TW14_DANRE	A0A2R8Q6F8_DANRE	Q1L8F5_DANRE	B0S6J2_DANRE	K7DY07_DANRE	F1R984_DANRE	A0A0R4IJ94_DANRE	A0A2R8RWX9_DANRE	I3IRX0_DANRE	E7F5K6_DANRE	A0A0G2KWG8_DANRE	E7FBA7_DANRE	A0A0R4IQ14_DANRE	A0A0R4IGL6_DANRE	F1R1J1_DANRE
molecular_function	GO:0035091	phosphatidylinositol binding	56	185	0.302703	1	1.89237e-07	1	0	SNX17_DANRE	B8JHS1_DANRE	Q4VA89_DANRE	A9JT54_DANRE	F1QM84_DANRE	A0A2R8PYW1_DANRE	A0A0R4IV01_DANRE	A0A2R8Q0B5_DANRE	F1R727_DANRE	A0A2R8QEJ6_DANRE	A0A2R8QLK0_DANRE	A0A0R4IDN5_DANRE	E9QCP7_DANRE	X1WFC4_DANRE	X1WHD2_DANRE	F1QGD0_DANRE	A0A2R8Q031_DANRE	A0A0R4ITX6_DANRE	E9QIC8_DANRE	A0A2R8RRP5_DANRE	A0A0R4IM96_DANRE	A0A140LGW1_DANRE	A0A2R8QKG1_DANRE	B8JHS0_DANRE	A0A0R4IUM4_DANRE	F1QG86_DANRE	A0A0R4ILR6_DANRE	A0A2R8Q4F0_DANRE	A0A2R8Q6W4_DANRE	A0A2R8QSP1_DANRE	A0A0G2L6J0_DANRE	A0A0G2L6L0_DANRE	E7F0G8_DANRE	A0A0R4IH08_DANRE	Q1L913_DANRE	E7FB06_DANRE	A0A2R8QNB2_DANRE	X1WC05_DANRE	E7FF26_DANRE	X1WHV4_DANRE
molecular_function	GO:0004843	thiol-dependent deubiquitinase	55	176	0.3125	0.997732	0.00379262	1	0.954	MINY1_DANRE	UBP33_DANRE	UBP16_DANRE	UBP13_DANRE	ZRN1B_DANRE	UBP37_DANRE	MYSM1_DANRE	B7ZDA8_DANRE	Q7M558_DANRE	F1QY38_DANRE	Q4FE55_DANRE	E7F3M4_DANRE	F8W3X0_DANRE	H9KUW6_DANRE	A0A2R8QUB8_DANRE	F1QGG2_DANRE	E7F4N9_DANRE	F1QG48_DANRE	A0A2R8QB18_DANRE	A0A0R4IPL2_DANRE	A0A2R8Q3R9_DANRE	U3JAF0_DANRE	A0A0R4IFT8_DANRE	A0A0H2UKG5_DANRE	A0A0R4IM95_DANRE	A0A2R8QN12_DANRE	A0A2R8RR17_DANRE	A0A2R8PX38_DANRE	A0A2R8RHY7_DANRE	A0A0R4IB93_DANRE	E9QC12_DANRE	E7F165_DANRE	F1QNF4_DANRE	E7FD00_DANRE	F1QHE7_DANRE	E7F6P1_DANRE	F1RCS0_DANRE	A0A0G2KWQ2_DANRE	E9QGP9_DANRE	F1QTC9_DANRE
biological_process	GO:0007519	skeletal muscle tissue development	55	162	0.339506	0.987406	0.0179536	1	1	DISP1_DANRE	F1QGX8_DANRE	Q4ZGL5_DANRE	Q4ZGL0_DANRE	A1IH00_DANRE	Q4ZGK9_DANRE	F8W5E0_DANRE	F1R1G8_DANRE	A0A2R8PZA9_DANRE	A0A0R4IJ71_DANRE	A0A2R8QM62_DANRE	A5WV02_DANRE	A0A0R4IDZ8_DANRE	A0A2R8RLV5_DANRE	F1QZQ0_DANRE	F1R7V2_DANRE	F1QDK4_DANRE	A0A2R8QKW7_DANRE	F1Q6P3_DANRE	A0A2R8RTS6_DANRE	U3JAM7_DANRE	A0A2R8QR17_DANRE	F1R7N8_DANRE	F1QU51_DANRE	A0A0R4INC4_DANRE	B0UYK4_DANRE	E9QCV2_DANRE	F1R0H8_DANRE	F1RCC9_DANRE	A0A2R8QEG3_DANRE	F8W4G8_DANRE	A0A2R8QLG6_DANRE	F1R899_DANRE	A0A2R8PVX9_DANRE	A0A2R8Q829_DANRE	F1R1J6_DANRE	E7F8G7_DANRE	Q5U7N6_DANRE	A0A2R8QJ58_DANRE	F8W281_DANRE
cellular_component	GO:0005929	cilium	54	208	0.259615	1	1.2771e-08	1	0	INVS_DANRE	KIF7_DANRE	ANKS6_DANRE	GP161_DANRE	EYS_DANRE	CP131_DANRE	CCD40_DANRE	FLTOP_DANRE	NPHP3_DANRE	TTLL6_DANRE	UBX10_DANRE	NEK8_DANRE	BROMI_DANRE	F1Q8X9_DANRE	Q6IQ78_DANRE	B0UYB0_DANRE	F1QHQ9_DANRE	A9C3Q6_DANRE	A0A2R8QKN0_DANRE	A0A286Y937_DANRE	A0A286YA69_DANRE	E9QDX2_DANRE	F1QUT2_DANRE	F1R8C8_DANRE	A5PM86_DANRE	F1QVN7_DANRE	F1QMA4_DANRE	E7F887_DANRE	A0A2R8QRB2_DANRE	A0A140LH35_DANRE	E7FAG4_DANRE	F1QDR3_DANRE	A0A2R8QPP2_DANRE	E9QEA2_DANRE	E7FC12_DANRE	Q1L8C0_DANRE	F1Q6X8_DANRE	E9QBJ9_DANRE	F1Q8L1_DANRE	U3JAI2_DANRE
cellular_component	GO:0005769	early endosome	54	157	0.343949	0.999552	0.000742693	1	0.271	SNX17_DANRE	PPR21_DANRE	SAC2_DANRE	TGFA1_DANRE	Q7SZZ7_DANRE	Q1RLV7_DANRE	A9JT54_DANRE	F1R9Z0_DANRE	F1Q5A1_DANRE	Q6GMH1_DANRE	E7FE32_DANRE	A2CEI3_DANRE	Q4VBV0_DANRE	Q7ZZT0_DANRE	A5D6T0_DANRE	F1QJX4_DANRE	B8JKJ1_DANRE	A0A0R4IV01_DANRE	A0A2R8RJG6_DANRE	A0A2R8QDY9_DANRE	B8JKJ2_DANRE	E7FGK6_DANRE	A0A0R4ITX6_DANRE	A0A2R8RHT0_DANRE	E7EXG2_DANRE	A0A0N5E8A0_DANRE	A0A140LGW7_DANRE	A0A0G2KQ55_DANRE	F1QA18_DANRE	A0A2R8QTZ8_DANRE	A0A2R8RYY2_DANRE	A0A0R4INI8_DANRE	A0A2R8RZZ9_DANRE	A0A2R8PYX4_DANRE	F1R7J9_DANRE	A0A2R8PYP9_DANRE	F1Q793_DANRE	F1QIB3_DANRE	F1RDL0_DANRE	F1Q4W5_DANRE
cellular_component	GO:0000785	chromatin	54	206	0.262136	0.986255	0.0178671	1	1	HPF1_DANRE	KLF1_DANRE	BRDT_DANRE	PDS5A_DANRE	BRD4_DANRE	PARI_DANRE	YAP1_DANRE	TBX6_DANRE	TBXTA_DANRE	IRAG2_DANRE	Q6IQH8_DANRE	A2CG09_DANRE	E7F0R9_DANRE	A4IG25_DANRE	A5D6S0_DANRE	B8A5K9_DANRE	Q1LYM8_DANRE	A8E7M3_DANRE	B0S649_DANRE	F1QV68_DANRE	A8B8L1_DANRE	B0S645_DANRE	B8JL25_DANRE	Q5TYX1_DANRE	A0A2R8Q2M3_DANRE	B0S6J2_DANRE	A0A0R4IYD2_DANRE	A0A0R4IDZ5_DANRE	A0A0R4IJ94_DANRE	F1QH24_DANRE	Q5RIV1_DANRE	A0A2R8Q8E3_DANRE	A0A2R8QFE1_DANRE	A0A0R4IAV1_DANRE	E7F3X7_DANRE	B0S651_DANRE	A0A2R8PVG8_DANRE	F1RD01_DANRE	A0A2R8RLC0_DANRE	E7F3R5_DANRE
molecular_function	GO:0005543	phospholipid binding	54	126	0.428571	0.999998	3.00479e-06	1	0.003	APOA1_DANRE	GLE1_DANRE	Q567G5_DANRE	Q7ZUY8_DANRE	Q5U3J4_DANRE	X1WG23_DANRE	Q7SYK6_DANRE	Q5XIZ7_DANRE	R4GEF6_DANRE	E9QIQ3_DANRE	R4GEJ9_DANRE	F1QVH9_DANRE	F1Q8M3_DANRE	A0A0G2L1F5_DANRE	A0A2R8QHM9_DANRE	A0A0R4INS3_DANRE	A0A0R4IG74_DANRE	F8W4C0_DANRE	E7FD40_DANRE	A0A2R8PZP4_DANRE	A0A2R8Q966_DANRE	B0R118_DANRE	A0A2R8QJD2_DANRE	F1QXB0_DANRE	A0A2R8QR05_DANRE	F1QJ24_DANRE	Q1LYH0_DANRE	E9QEC4_DANRE	E9QF57_DANRE	A0A0R4IAB1_DANRE	A0A2R8QMC5_DANRE	A0A0R4IN54_DANRE	E9QBT3_DANRE	A0A2R8QI28_DANRE	Q1LVN6_DANRE	E7FA94_DANRE	A0A2R8QTE7_DANRE	A0A286Y8L1_DANRE	F1QMN5_DANRE	F1QDZ6_DANRE
biological_process	GO:0043087	regulation of GTPase activity	53	104	0.509615	1	1.41296e-15	1	0	PLXA3_DANRE	A5PF31_DANRE	A0A0R4IKK1_DANRE	B0S8J8_DANRE	Q1LXZ0_DANRE	F1QBC0_DANRE	F6P057_DANRE	F1QZQ3_DANRE	X1WE29_DANRE	A0A0R4INY5_DANRE	F1RAN5_DANRE	Q7ZYZ0_DANRE	A0A2R8QMH0_DANRE	B0S6Z2_DANRE	E7FBD0_DANRE	A0A2R8PX85_DANRE	E7FGY1_DANRE	F1QY39_DANRE	A0A2R8PWA9_DANRE	A0A2R8Q3J7_DANRE	F6PDT3_DANRE	A0A0R4IGU8_DANRE	E7FCI7_DANRE	U3JAB3_DANRE	F1Q782_DANRE	E7F1U4_DANRE	A0A2R8PXC7_DANRE	B0UYK0_DANRE	Q5RH91_DANRE	E9QHX3_DANRE	F1Q7U0_DANRE	E7F1R9_DANRE	E7F4G2_DANRE	K7DYN0_DANRE	F1QFF3_DANRE	F1R1Z3_DANRE	A0A2R8RLH0_DANRE	F1QX32_DANRE	F1Q6L2_DANRE	F1QAC1_DANRE
cellular_component	GO:0008021	synaptic vesicle	53	155	0.341935	0.957282	0.0579516	1	1	CSN4_DANRE	ROGDI_DANRE	NTF7_DANRE	Q6PHV0_DANRE	Q6NZ01_DANRE	Q2HPG0_DANRE	F1QDL6_DANRE	Q7ZV18_DANRE	Q6AXI5_DANRE	A0A2R8RMZ0_DANRE	A0A2R8RWS3_DANRE	F1QKW9_DANRE	A0A1D5NSQ0_DANRE	A0A0R4IZI1_DANRE	A0A2R9YJM9_DANRE	A0A2R8QHM9_DANRE	A0A0R4INS3_DANRE	F1Q9E4_DANRE	A0A0R4IXG8_DANRE	E7FD40_DANRE	A0A286Y9I3_DANRE	F1QR36_DANRE	A0A0G2KQA6_DANRE	A0A140LGW7_DANRE	A0A2R8QL66_DANRE	E7F2P0_DANRE	A0A2R8Q2L9_DANRE	E9QDA3_DANRE	E7F0D3_DANRE	F1R7J9_DANRE	F8W5M9_DANRE	A0A286YBQ2_DANRE	E9QF57_DANRE	A0A2R8Q6Y3_DANRE	A0A0R4IN54_DANRE	A0A286YAZ9_DANRE	A0A286YBB0_DANRE	X1WDZ6_DANRE	F1QDZ6_DANRE	A0A1D5NS70_DANRE
biological_process	GO:0006468	protein phosphorylation	53	269	0.197026	1.25739e-11	1	0	1	JAK1_DANRE	SIK3_DANRE	F1R801_DANRE	X1WGA8_DANRE	X1WG08_DANRE	Q1RLX1_DANRE	Q8JFB0_DANRE	B3DJG0_DANRE	F1R8Q2_DANRE	Q9W629_DANRE	F1QWY2_DANRE	Q7ZVD7_DANRE	F1QTF2_DANRE	F1R343_DANRE	A0A2R8RYK6_DANRE	A0A2R8RT66_DANRE	A0A0R4IEP9_DANRE	A0A0R4IFS2_DANRE	F6P1L8_DANRE	B0S578_DANRE	E7F2F9_DANRE	A0A2R8QPF3_DANRE	B0S6K0_DANRE	A0A0R4IIN0_DANRE	B0UY93_DANRE	E7F885_DANRE	A0A2R8PWB8_DANRE	B0V0H4_DANRE	A0A0R4IP53_DANRE	A0A0G2L7B5_DANRE	A0A140LH83_DANRE	F1Q7K1_DANRE	E7F2L1_DANRE	F1QHX7_DANRE	A0A2R8QUH6_DANRE	F1R0T3_DANRE	F1QGW2_DANRE	X1WD79_DANRE	X1WGD9_DANRE	A0A2R8RPD7_DANRE
biological_process	GO:0018105	peptidyl-serine phosphorylation	53	240	0.220833	0.131605	0.897215	1	1	TLK2_DANRE	IKKA_DANRE	E7F7I3_DANRE	B0S6F4_DANRE	Q6DHN7_DANRE	E7FE66_DANRE	Q1LUZ7_DANRE	D1L3Y5_DANRE	B0S8I4_DANRE	E7F551_DANRE	A0A2R8QBK5_DANRE	A0A2R8Q7F4_DANRE	A0A2R8QF71_DANRE	A0A0R4INQ1_DANRE	F1QYQ1_DANRE	E7F765_DANRE	A0A2R8PZ58_DANRE	E7FE05_DANRE	E7F0L8_DANRE	A0A2R8QST5_DANRE	A0A2R8QDB0_DANRE	F1QJV2_DANRE	A0A2R8QDD3_DANRE	A0A2R8QD85_DANRE	F1RE77_DANRE	A0A2R8RZE0_DANRE	A0A2R8QCB2_DANRE	A0A2R8Q7D9_DANRE	A0A2R8QB11_DANRE	A0A2R8RJF1_DANRE	X1WBG3_DANRE	A0A2R8QTX0_DANRE	Q1MTA8_DANRE	A0A2R8QNB7_DANRE	A0A2R8Q0B7_DANRE	A0A0R4IBF0_DANRE	E7F202_DANRE	E9QG10_DANRE	A0A2R8QPN8_DANRE	E7F544_DANRE
biological_process	GO:0007049	cell cycle	52	206	0.252427	0.776708	0.24018	1	1	CCDB1_DANRE	CC14A_DANRE	ERC6L_DANRE	HACE1_DANRE	BECN1_DANRE	FIGN_DANRE	CD123_DANRE	SPC24_DANRE	RFP4A_DANRE	RFIP3_DANRE	AMR1A_DANRE	AMR1B_DANRE	ARP8_DANRE	FL2D_DANRE	NEK8_DANRE	LIN54_DANRE	BANP_DANRE	F1QRC8_DANRE	A0A2R8QM99_DANRE	A2CEF0_DANRE	F1QMW5_DANRE	A2RUX1_DANRE	B0UY57_DANRE	Q08CT1_DANRE	B0S576_DANRE	Q1LV44_DANRE	F1RB27_DANRE	H9KUW6_DANRE	E9QD03_DANRE	E7FG55_DANRE	Q1LYC2_DANRE	A0A0H2UKG5_DANRE	F1QKD5_DANRE	E9QBK4_DANRE	F1QA18_DANRE	A0A286Y9L2_DANRE	F1QV66_DANRE	F6NQ00_DANRE	B8A6A6_DANRE	I7HPA5_DANRE
biological_process	GO:0007219	Notch signaling pathway	52	148	0.351351	0.999595	0.000669179	1	0.633	MIB1_DANRE	APH1B_DANRE	NOTC1_DANRE	RFNG_DANRE	DLLC_DANRE	JAG1A_DANRE	F1Q8W5_DANRE	Q6PBX3_DANRE	B3DJD1_DANRE	B0UYB0_DANRE	O93616_DANRE	Q6W4T8_DANRE	F1QNB9_DANRE	A4FTT4_DANRE	E7F958_DANRE	A0A0R4IHW3_DANRE	A0A2R8QM70_DANRE	X1WG91_DANRE	F1QCA7_DANRE	A0A2R8Q7E4_DANRE	F1RCH4_DANRE	A0A2R8QH43_DANRE	F1QVN7_DANRE	B8A566_DANRE	F1QP77_DANRE	E7EYM4_DANRE	A0A2R8QI31_DANRE	A0A2R8QRB2_DANRE	B8JKQ5_DANRE	A0A286YAQ6_DANRE	A4FTT3_DANRE	Q90466_DANRE	A0A2R8RZ82_DANRE	A0A0H2UKK7_DANRE	A0A0R4IW83_DANRE	A0A2R8QDU7_DANRE	F8W2W5_DANRE	E7F5M0_DANRE	A0A0R4IT11_DANRE	Q5SPB5_DANRE
biological_process	GO:0043009	chordate embryonic development	52	211	0.246445	0.999999	1.89909e-06	1	0.006	TAB2_DANRE	NDUF7_DANRE	EST1A_DANRE	SMG7_DANRE	SDCG8_DANRE	SMG5_DANRE	NCOA2_DANRE	RENT1_DANRE	AMR1A_DANRE	AMR1B_DANRE	NBAS_DANRE	A5YC70_DANRE	E7F4D0_DANRE	Q7ZUN6_DANRE	B8JIV1_DANRE	B7ZUV4_DANRE	A0A1X9RK86_DANRE	A0A1X9RK88_DANRE	A0A1X9RK87_DANRE	A0A0R4ISD9_DANRE	E7FB31_DANRE	X1WBM9_DANRE	Q5TYS1_DANRE	A0A2R8Q844_DANRE	A0A2R8RLV5_DANRE	Q1LWJ4_DANRE	X1WGL1_DANRE	F1R6L2_DANRE	A0A0A0MPG9_DANRE	F1QGA1_DANRE	F1QNG7_DANRE	F1QNX5_DANRE	A0A0R4IGP2_DANRE	F1R1J6_DANRE	A0A2R8Q2J0_DANRE	A0A0R4IZV0_DANRE	A0A2R8Q8E3_DANRE	B0R0F2_DANRE	A0A2R8QJ16_DANRE	B8JKW4_DANRE
biological_process	GO:0060041	retina development in camera-type eye	52	160	0.325	0.994665	0.00740098	1	1	NRF1_DANRE	PMGT2_DANRE	PAL1A_DANRE	RANB9_DANRE	B3DKL9_DANRE	Q6NYI3_DANRE	Q52WY2_DANRE	I3IT91_DANRE	Q7ZUN6_DANRE	E9QC71_DANRE	Q6P0F1_DANRE	Q6DRF8_DANRE	F1R0W9_DANRE	B3DK47_DANRE	B0R0V8_DANRE	Q6PC35_DANRE	Q6NV43_DANRE	Q6DGM5_DANRE	Q7ZVY3_DANRE	A0A2R8Q5A2_DANRE	F1R8E2_DANRE	A0A0A0MPG9_DANRE	I3ITD8_DANRE	A0A140LGX4_DANRE	F1Q7I7_DANRE	A0A2R8RSI4_DANRE	A2AWU2_DANRE	F1QM29_DANRE	A0A0R4ILR3_DANRE	A2AWU3_DANRE	F1QHX5_DANRE	A0A0R4IL44_DANRE	A4FTT3_DANRE	Q6P975_DANRE	V5ZE41_DANRE	A0A2R8RP20_DANRE	A0A286YA27_DANRE	U3JAV8_DANRE	F8W4Z3_DANRE	A2AR67_DANRE
cellular_component	GO:0062023	collagen-containing extracellular matrix	52	217	0.239631	0.788488	0.250135	1	1	VWA1_DANRE	TSP4B_DANRE	Q1LWR7_DANRE	E7FA40_DANRE	B0S6K6_DANRE	B3DFV8_DANRE	Q9PVF5_DANRE	B0S6K5_DANRE	A0A2R8Q779_DANRE	X1WFI8_DANRE	F1QSR3_DANRE	F1QVG7_DANRE	E7FB76_DANRE	Q1MT43_DANRE	F8W5Z7_DANRE	E7F9P0_DANRE	F1Q6P3_DANRE	F1RAW4_DANRE	F1RCF3_DANRE	A0A0R4IXV0_DANRE	K7DYH0_DANRE	A0A0R4IMG6_DANRE	A2CEW3_DANRE	F1Q5U3_DANRE	A0A2R8QAJ4_DANRE	Q6NYE1_DANRE	X1WF98_DANRE	E7EZJ2_DANRE	A0A0R4IB74_DANRE	E7F1S4_DANRE	A0A0G2L863_DANRE	E7EXF3_DANRE	F8W542_DANRE	A0A2R8QF61_DANRE	F1R9Y1_DANRE	A0A0R4IP59_DANRE	A0A2R8Q579_DANRE	A0A0R4IIK5_DANRE	F1QYL5_DANRE	A0A0G2KQ62_DANRE
biological_process	GO:0030198	extracellular matrix organization	51	227	0.22467	0.636696	0.408388	1	1	CRA1B_DANRE	B3DLK0_DANRE	Q2LDA1_DANRE	A0A2R8RNY2_DANRE	A0A286YAI0_DANRE	E9QDK3_DANRE	E7FE04_DANRE	Q5SPR1_DANRE	E7FEN5_DANRE	X1WHI6_DANRE	F1RDA9_DANRE	E7FET3_DANRE	F1QM25_DANRE	A0A2R8QFF2_DANRE	E7FFX0_DANRE	A0A0R4IMA3_DANRE	E7FFQ4_DANRE	F1R2Z7_DANRE	F1QYN1_DANRE	E7FBX1_DANRE	F1QT86_DANRE	X1WFR7_DANRE	X1WEZ4_DANRE	A0A2R8RIW6_DANRE	A0A2R8QKV2_DANRE	E7F6N6_DANRE	F1R544_DANRE	E7EY71_DANRE	A0A0R4ISF7_DANRE	A0A0R4IHB0_DANRE	F1R8A1_DANRE	C0H5W1_DANRE	K7DYA5_DANRE	F1QU19_DANRE	M9MMB9_DANRE	F1QAB3_DANRE	A0A1L1QZU7_DANRE	F1Q924_DANRE	A5WUJ9_DANRE	F8W5B3_DANRE
cellular_component	GO:0000932	P-body	51	104	0.490385	1	8.7071e-10	1	0	YTHD2_DANRE	PATL1_DANRE	CNOT1_DANRE	EDC4_DANRE	E9QJN4_DANRE	Q1LV60_DANRE	E7FGM4_DANRE	Q6P0B2_DANRE	E7F1G8_DANRE	E7F923_DANRE	A4QN63_DANRE	A0A0R4IJ26_DANRE	Q1LUD8_DANRE	A8E5K6_DANRE	Q803B9_DANRE	E7FD91_DANRE	A8DZI0_DANRE	A0A2R8PW86_DANRE	A0A2R8RP64_DANRE	A0A2R8QNC7_DANRE	F1QRP4_DANRE	A0A2R8QKK6_DANRE	A0A2R8QG59_DANRE	A0A2R8RPF4_DANRE	A0A2R8QAQ6_DANRE	E9QE21_DANRE	E9QGK5_DANRE	A0A0R4IB26_DANRE	F1QIS2_DANRE	A0A0R4IVM1_DANRE	E7FAC4_DANRE	A0A2R8RQW3_DANRE	F1R4F6_DANRE	I3IRW6_DANRE	U3JAU2_DANRE	A0A286YB96_DANRE	E7F350_DANRE	X1WG96_DANRE	E9QCV7_DANRE	A0A2R8S0G2_DANRE
biological_process	GO:0007160	cell-matrix adhesion	51	150	0.34	0.999597	0.000724375	1	0.674	B0S6K6_DANRE	B3DIP9_DANRE	A0A2R8PXY2_DANRE	B0S6K5_DANRE	E7EXK7_DANRE	X1WCS2_DANRE	E7F2S5_DANRE	A0A0R4IT95_DANRE	F1QSR3_DANRE	A0A0R4ICP6_DANRE	A0A0R4IZL3_DANRE	A0A0R4IL96_DANRE	A0A2R8RLV5_DANRE	X1WG46_DANRE	A0A2R8Q435_DANRE	E7FE29_DANRE	F1R4B2_DANRE	A2CEW3_DANRE	A0A0R4IDJ5_DANRE	A0A0G2KVA3_DANRE	A0A0G2L7A9_DANRE	A0A0R4IYA9_DANRE	A0A0R4IQC0_DANRE	A0A0R4IKM2_DANRE	F1R1J6_DANRE	A0A0G2KME6_DANRE	A0A2R8QKW3_DANRE	X1WBC5_DANRE	A0A0R4IT87_DANRE	A0A0G2KRC5_DANRE	A0A0R4IZP0_DANRE	Q6NYE1_DANRE	A0A0R4IDN9_DANRE	A0A0R4ID95_DANRE	X1WGQ8_DANRE	Q5RI93_DANRE	A0A0R4J7R2_DANRE	A0A0R4IIG6_DANRE	A0A0R4IWA7_DANRE	A0A0R4IBR8_DANRE
biological_process	GO:0034765	regulation of ion transmembrane transport	51	224	0.227679	0.0816701	0.933522	1	1	SC4AA_DANRE	E7FB36_DANRE	F1QNK9_DANRE	E7FGH1_DANRE	A0A142J9E8_DANRE	A2VCZ7_DANRE	E7F278_DANRE	A0A2R8Q685_DANRE	A0A0R4INP7_DANRE	A0A286Y962_DANRE	A8B6E8_DANRE	I3ITL7_DANRE	A0A0R4ISS8_DANRE	A0A2R8QD65_DANRE	A0A2R8QPN6_DANRE	F1RB62_DANRE	A0A0R4IQC4_DANRE	E7F7K0_DANRE	Q5RHB1_DANRE	A0A2R8RUK8_DANRE	E7FFQ6_DANRE	A0A2R8Q8L4_DANRE	A8WHX9_DANRE	X1WBF7_DANRE	X1WCF7_DANRE	X1WCE7_DANRE	F6P346_DANRE	A0A2R8QJR0_DANRE	A0A0G2KRC3_DANRE	E7F4T2_DANRE	Q5TZ68_DANRE	E7F9F6_DANRE	A0A2R8Q2R0_DANRE	F1QIE6_DANRE	E0R7P9_DANRE	A0A2R8QAI6_DANRE	A0A2R8QDT8_DANRE	A0A2R8QSA8_DANRE	E7FD27_DANRE	U3JA71_DANRE
molecular_function	GO:0000149	SNARE binding	51	161	0.31677	0.990309	0.0141638	1	1	NBAS_DANRE	Q6PHV0_DANRE	E7EY52_DANRE	A0A2R8Q071_DANRE	Q7ZV18_DANRE	Q6AXI5_DANRE	Q1LYA7_DANRE	Q567Y3_DANRE	Q7SY45_DANRE	A0A2R8RWS3_DANRE	F1QKW9_DANRE	A0A0R4IAZ9_DANRE	A0A2R8RWI1_DANRE	I3IS33_DANRE	B8JJU3_DANRE	A0A2R8QIF2_DANRE	A0A0R4IXG8_DANRE	A0A286Y9I3_DANRE	F1QIQ6_DANRE	A0A0R4ICL5_DANRE	E7F2P0_DANRE	A0A2R8QH10_DANRE	A0A2R8RKH5_DANRE	F1R0A4_DANRE	U3JA52_DANRE	B0V0Y6_DANRE	X1WEE0_DANRE	A0A2R8RS78_DANRE	A0A2R8QCB9_DANRE	F1QUF6_DANRE	A0A0R4IK07_DANRE	E7F0D3_DANRE	F8W5M9_DANRE	B8A541_DANRE	A0A286YBQ2_DANRE	A0A286YAZ9_DANRE	F1QRB4_DANRE	A0A0R4IMX2_DANRE	X1WDZ6_DANRE	A0A2R8RVP9_DANRE
cellular_component	GO:0031410	cytoplasmic vesicle	50	181	0.276243	0.99545	0.00541403	1	0.875	SNX17_DANRE	JMY_DANRE	AP2MA_DANRE	MIB1_DANRE	FGR1A_DANRE	P4K2A_DANRE	WDR11_DANRE	AMOL2_DANRE	AMR1A_DANRE	AMR1B_DANRE	AP2MB_DANRE	Q7SZZ7_DANRE	A9C463_DANRE	F1QDL6_DANRE	E7F8Q6_DANRE	A0A2R8Q0K6_DANRE	A0A0R4IIT5_DANRE	A0A0R4IRH4_DANRE	A0A2R8Q7J5_DANRE	A0A286Y972_DANRE	A0A0R4IIC4_DANRE	E7FGK6_DANRE	Q1LV52_DANRE	E9QIS0_DANRE	F1R6X2_DANRE	A0A2R8Q450_DANRE	A0A0R4ITV8_DANRE	E7FCE7_DANRE	E7FA12_DANRE	I3IT20_DANRE	A2BGP3_DANRE	U3JAI8_DANRE	A0A2R8RYY2_DANRE	B8A5S6_DANRE	E9QFX4_DANRE	F1QRM3_DANRE	A0A2R8QK71_DANRE	F6NKU7_DANRE	E7F701_DANRE	E7FCR8_DANRE
biological_process	GO:0000209	protein polyubiquitination	50	200	0.25	0.870978	0.161046	1	1	HACE1_DANRE	SMUF2_DANRE	TRIPC_DANRE	AMR1A_DANRE	AMR1B_DANRE	DTL_DANRE	Q7ZTZ6_DANRE	Q1LV60_DANRE	Q7T355_DANRE	F1Q546_DANRE	F1Q4N1_DANRE	U6C7X6_DANRE	A2VCZ7_DANRE	A8DZI0_DANRE	E7F1A2_DANRE	A0A286Y9V7_DANRE	F1QSH0_DANRE	A8WIS6_DANRE	Q1LYI3_DANRE	A0A2R8QHS6_DANRE	A0A2R8PVA3_DANRE	X1WD98_DANRE	A0A2R8QKK6_DANRE	A0A2R8Q7I3_DANRE	A2BGM8_DANRE	A0A0R4IUP8_DANRE	F1Q8K3_DANRE	E7F5S3_DANRE	F6P346_DANRE	A0A2R8QPQ7_DANRE	Q1LUI6_DANRE	X1WEK3_DANRE	F1QL68_DANRE	A0A2R8Q4L4_DANRE	A0A2R8QLH9_DANRE	E7F6E1_DANRE	A0A286YBF5_DANRE	A4QN36_DANRE	F1QEG9_DANRE	E7F8Q5_DANRE
biological_process	GO:0001755	neural crest cell migration	50	202	0.247525	0.650301	0.410959	1	1	SE3AB_DANRE	SEM4E_DANRE	SE3AA_DANRE	NUSAP_DANRE	FXC1B_DANRE	NRP1A_DANRE	PHR4A_DANRE	PHR4B_DANRE	WDR11_DANRE	MD13L_DANRE	F1QQ50_DANRE	F1R5S1_DANRE	B0S6D0_DANRE	Q90XD1_DANRE	E7F898_DANRE	E9QHI1_DANRE	F1QYE2_DANRE	O57416_DANRE	A0A2R8Q0R5_DANRE	F1QN93_DANRE	A0A286Y9T7_DANRE	A0A2R8QHE8_DANRE	A0A2R8QAH3_DANRE	F1QP50_DANRE	F1QU86_DANRE	F2Z4V3_DANRE	F1Q6J9_DANRE	E7FEP0_DANRE	F1QGW9_DANRE	Q5SP54_DANRE	A0A0R4IDW5_DANRE	A0A2R8QQ09_DANRE	Q1LYS1_DANRE	A0A2R8S019_DANRE	B8JMB1_DANRE	A0A2R8PV67_DANRE	X1WF24_DANRE	A0A0G2KQ30_DANRE	F1RB05_DANRE	X1WH68_DANRE
molecular_function	GO:0000287	magnesium ion binding	50	256	0.195312	0.15821	0.876434	1	1	SIK3_DANRE	YDJC_DANRE	A0A2R8QH67_DANRE	A0A2R8PW01_DANRE	A0A2R8Q7F4_DANRE	X1WCP3_DANRE	E9QCB3_DANRE	F1QYQ1_DANRE	A0A0R4IC01_DANRE	A0A2R8QDW8_DANRE	E7F765_DANRE	A0A2R8PZ58_DANRE	E7FE05_DANRE	A0A2R8Q2C3_DANRE	F1QHK0_DANRE	A0A2R8RKF4_DANRE	E7F0L8_DANRE	A0A2R8Q8E4_DANRE	A0A2R8QDB0_DANRE	A0A2R8QD85_DANRE	E7FFK0_DANRE	A0A2R8Q3S1_DANRE	A0A0R4IP49_DANRE	A0A2R8QM22_DANRE	A0A2R8RZE0_DANRE	A0A2R8QCB2_DANRE	A0A2R8Q7D9_DANRE	A0A2R8QPQ6_DANRE	A0A2R8QEZ8_DANRE	F1RB36_DANRE	A0A0R4IZC8_DANRE	A0A2R8QTX0_DANRE	A0A2R8Q447_DANRE	A0A2R8Q0B7_DANRE	A0A2R8QNN7_DANRE	A0A0R4IBF0_DANRE	E7F202_DANRE	A0A2R8QJG7_DANRE	A0A2R8QFY2_DANRE	A0A286Y9U6_DANRE
biological_process	GO:0043066	negative regulation of apoptotic process	48	476	0.10084	1.92836e-09	1	0	1	SUV3_DANRE	MDM2_DANRE	SH3R1_DANRE	LSMD1_DANRE	NEST_DANRE	HEAT1_DANRE	YAP1_DANRE	PRDM9_DANRE	CHD8_DANRE	IKKA_DANRE	B0S6T6_DANRE	Q9PUT7_DANRE	Q7T0K2_DANRE	B0R0S8_DANRE	B0S6T7_DANRE	B3DJT4_DANRE	A2BG23_DANRE	A0A0G2KHN8_DANRE	F1QKJ0_DANRE	X1WG33_DANRE	B0R0S9_DANRE	Q5SP48_DANRE	A0A2R8PYK8_DANRE	X1WGR0_DANRE	A0A0R4ILG6_DANRE	A0A2R8Q7I3_DANRE	A0A0H2UJD7_DANRE	F1R487_DANRE	X1WF03_DANRE	F1R8Q9_DANRE	A0A1D5NT19_DANRE	A0A0R4ISQ1_DANRE	A0A1D5NS58_DANRE	B0S6U4_DANRE	Q5SP49_DANRE	Q90Z98_DANRE	F1QHY3_DANRE	F1QAD6_DANRE	X1WCA9_DANRE	E7FH24_DANRE
biological_process	GO:0009953	dorsal/ventral pattern formation	48	167	0.287425	0.999421	0.000938006	1	0.808	I17RD_DANRE	FCHO1_DANRE	CAPR2_DANRE	AXIN2_DANRE	FGR1A_DANRE	PO5F1_DANRE	B0S6T1_DANRE	Q9YI02_DANRE	Q6NYN9_DANRE	Q7SX66_DANRE	A8WFS2_DANRE	Q1RLX1_DANRE	Q8JFB0_DANRE	B3DJG0_DANRE	Q7T2L8_DANRE	Q9W629_DANRE	Q9DGM9_DANRE	Q9W6I6_DANRE	F1QY45_DANRE	F8W3X0_DANRE	E9QIQ3_DANRE	A0A0R4INF0_DANRE	A0A0R4IPL2_DANRE	F1QH64_DANRE	F1R5Z7_DANRE	A0A0R4IG74_DANRE	A0A288CG34_DANRE	A0A2R8QLF5_DANRE	B8A6E8_DANRE	F1QHE7_DANRE	A0A2R8RT96_DANRE	F1QAD6_DANRE	A0A0R4IZN8_DANRE	A0A286Y942_DANRE	E7FC99_DANRE	F1QTC9_DANRE	E9QEC4_DANRE	A5WW41_DANRE	A0A2R8QTE7_DANRE	F1QSH8_DANRE
biological_process	GO:0031175	neuron projection development	48	142	0.338028	1	1.31288e-09	1	0	CAM1B_DANRE	E7F9D4_DANRE	A0A0R4J7C3_DANRE	E7F3J0_DANRE	F6NTM9_DANRE	A0A286YAV6_DANRE	B8JMD7_DANRE	A0A286Y8P6_DANRE	F1QGA8_DANRE	X1WE04_DANRE	A0A2R8QNL6_DANRE	F1QPM0_DANRE	F1Q6J9_DANRE	A0A2R8PYU5_DANRE	E7FF64_DANRE	G1K2T5_DANRE	A0A2R8QNP2_DANRE	E7F693_DANRE	F1Q6G4_DANRE	A0A2R8QHG8_DANRE	F1QYG8_DANRE	A0A2R8RY18_DANRE	E7F3U0_DANRE	A0A2R8RJ37_DANRE	A0A0R4IGJ6_DANRE	Q1LUF1_DANRE	F1R1D6_DANRE	E7F571_DANRE	E7FE96_DANRE	F1RBJ2_DANRE	B8A5Y8_DANRE	F1Q557_DANRE	F1QSH5_DANRE	A0A0R4ILN3_DANRE	A0A2R8QR28_DANRE	A0A2R8QL20_DANRE	A0A2R8QPP0_DANRE	E7F8H1_DANRE	A0A2R8Q3I4_DANRE	A0A2R8QR73_DANRE
biological_process	GO:0016192	vesicle-mediated transport	48	281	0.170819	0.605412	0.416243	1	1	AP2MA_DANRE	VP33B_DANRE	TBC8B_DANRE	AP2MB_DANRE	Q6NYJ9_DANRE	Q7SZZ7_DANRE	A9C463_DANRE	F1QDL6_DANRE	F1QIC2_DANRE	E7EY38_DANRE	F1R8D3_DANRE	E9QC84_DANRE	X1WCL7_DANRE	A0A0R4IZC4_DANRE	A0A2R8QEJ6_DANRE	F1QCS5_DANRE	E7EZC1_DANRE	A0A2R8RWI1_DANRE	I3IS33_DANRE	B0UYE8_DANRE	A0A0R4ITX6_DANRE	A0A2R8QRX3_DANRE	F1QM13_DANRE	A0A2R8Q6M9_DANRE	F1QLI6_DANRE	F6NK19_DANRE	U3JA52_DANRE	A0A2R8RS78_DANRE	F1QP13_DANRE	Q6P6Y4_DANRE	I3IRW3_DANRE	A0A2R8Q1P8_DANRE	F1RAE9_DANRE	A0A0G2KCY3_DANRE	A5WVP1_DANRE	F1QV13_DANRE	A5PMS9_DANRE	F1R8C1_DANRE	A0A2R8Q420_DANRE	X1WDZ6_DANRE
cellular_component	GO:0042995	cell projection	48	201	0.238806	1	2.00376e-11	1	0	KIZ_DANRE	SDCG8_DANRE	THS7A_DANRE	F8W5U5_DANRE	Q8AX99_DANRE	E7F186_DANRE	A0A0R4IN22_DANRE	A0A0R4ICV6_DANRE	U3JA74_DANRE	E9QFR8_DANRE	A0A0G2L1F5_DANRE	F1R7V2_DANRE	F1QDK4_DANRE	F1RA35_DANRE	A0A0R4IGJ8_DANRE	X1WBC3_DANRE	F8W4C0_DANRE	A0A0H2UKN4_DANRE	F1R6X2_DANRE	F1Q6T0_DANRE	A0A2R8Q450_DANRE	F1R0H8_DANRE	F1QXB0_DANRE	A0A0R4IWJ1_DANRE	F1Q793_DANRE	A0A0R4IXX0_DANRE	A0A0R4IZ96_DANRE	A0A0R4IS21_DANRE	F1QCM5_DANRE	A0A286Y9C5_DANRE	A8E7E7_DANRE	B0S753_DANRE	A0A2R8PWB6_DANRE	R4GEC6_DANRE	A0A2R8Q661_DANRE	A0A2R8QIZ5_DANRE	A0A2R8RZ80_DANRE	F1QHT1_DANRE	A0A2R8QBL5_DANRE	B0R1B8_DANRE
biological_process	GO:0006338	chromatin remodeling	47	120	0.391667	0.99946	0.000900082	1	0.799	RUVB2_DANRE	KD5BB_DANRE	BRDT_DANRE	BRD4_DANRE	ARP8_DANRE	MYSM1_DANRE	JARD2_DANRE	A0A2R8RU42_DANRE	E1ANH4_DANRE	Q1LUQ0_DANRE	Q1LUN2_DANRE	A0A2R8QPC0_DANRE	A0A2R8Q6N1_DANRE	A0A2R8RHT9_DANRE	A0A0R4IR17_DANRE	A8WIP9_DANRE	F6NTB4_DANRE	F1Q750_DANRE	A0A2R8QCF1_DANRE	A8WIP5_DANRE	A0A0R4IJ25_DANRE	A0A0G2KUW7_DANRE	A0A2R8Q4T8_DANRE	E7F6J7_DANRE	E7F9V6_DANRE	A0A2R8QQQ0_DANRE	A0A2R8QHR6_DANRE	F1QPD2_DANRE	F1QVI1_DANRE	A0A0R4IVD0_DANRE	E7F3R5_DANRE	F6P0Z6_DANRE	A0A0R4ISW4_DANRE	A0A2R8QFG7_DANRE	Q1MTE3_DANRE	F8W2E9_DANRE	F1QNG0_DANRE	Q5RGW7_DANRE	F1QQP6_DANRE	F6PBX5_DANRE
biological_process	GO:0048793	pronephros development	47	124	0.379032	1	3.71992e-07	1	0	ANKS6_DANRE	DAAF1_DANRE	MIB1_DANRE	CE290_DANRE	CCD40_DANRE	GRB1L_DANRE	NPHP3_DANRE	ETV4_DANRE	TBX2_DANRE	PAX2A_DANRE	NEK8_DANRE	B0S6T1_DANRE	F1RD80_DANRE	Q9PUT7_DANRE	Q6TNS1_DANRE	A9C3Q6_DANRE	F1RBW3_DANRE	F1QK52_DANRE	A0A0R4IER9_DANRE	A0A2R8QMD0_DANRE	E7F6Z8_DANRE	B8JL25_DANRE	F1R8C8_DANRE	A0A2R8QH43_DANRE	F1QSP6_DANRE	E7F6Y9_DANRE	A0A2R8QC01_DANRE	A2BFC8_DANRE	A0A2R8QQY4_DANRE	A0A2R8RKU6_DANRE	F1QAD6_DANRE	A0A2R8QLL1_DANRE	F6NUK4_DANRE	E7F350_DANRE	A0A2R8QCK8_DANRE	F1QZF2_DANRE	A0A2R8PW40_DANRE	A0A2R8RXK7_DANRE	A0A2R8QQL1_DANRE	F1R019_DANRE
biological_process	GO:0048666	neuron development	47	106	0.443396	1	9.80413e-14	1	0	MIB1_DANRE	TEN3_DANRE	TEN4_DANRE	DLLC_DANRE	DLX3B_DANRE	GLE1_DANRE	DLX4B_DANRE	Q9I9B7_DANRE	A8E5K6_DANRE	A0A2R8Q360_DANRE	A0A2R8PW01_DANRE	A0A0R4IN22_DANRE	A0A0R4ICV6_DANRE	X1WCP3_DANRE	F1QU90_DANRE	F1R7V2_DANRE	F1QDK4_DANRE	A0A2R8QNV1_DANRE	A0A0R4IGJ8_DANRE	E9QH15_DANRE	F1RA92_DANRE	F1R0H8_DANRE	F8W3R9_DANRE	A0A2R8Q8E4_DANRE	F1QSY5_DANRE	F1Q6N0_DANRE	A0A0R4IXX0_DANRE	A0A286Y9C5_DANRE	A0A2R8Q498_DANRE	A0A2R8QEZ8_DANRE	E7EZR4_DANRE	A0A2R8QNN7_DANRE	A0A2R8Q661_DANRE	A0A2R8QIZ5_DANRE	A0A2R8QJG7_DANRE	A0A2R8RZ80_DANRE	E7FGW2_DANRE	F1QTW9_DANRE	A0A286Y9U6_DANRE	E9QFC1_DANRE
biological_process	GO:0001947	heart looping	46	176	0.261364	0.786674	0.266017	1	1	INVS_DANRE	DAAF1_DANRE	FOXN4_DANRE	HACE1_DANRE	CCD40_DANRE	CEIP2_DANRE	GPR22_DANRE	COBL_DANRE	TBX6L_DANRE	MCA2B_DANRE	TBX5A_DANRE	TBX2_DANRE	TBXTA_DANRE	NEK8_DANRE	CE162_DANRE	DZIP1_DANRE	Q9YI02_DANRE	Q98873_DANRE	B0BF33_DANRE	E3W6T6_DANRE	Q9I9I2_DANRE	E9QDJ5_DANRE	F1R7N7_DANRE	Q5RJ81_DANRE	F1Q6W8_DANRE	F1Q5T5_DANRE	F1R259_DANRE	E7EXH4_DANRE	A0A286YBQ8_DANRE	A0A0R4IUG1_DANRE	B8A5N9_DANRE	B8JL25_DANRE	F1Q6J9_DANRE	B8JKS6_DANRE	B0V0H4_DANRE	G1K2W9_DANRE	A0A0R4IQK3_DANRE	F1QAD6_DANRE	F8W4Z3_DANRE	A0A0R4IPF3_DANRE
molecular_function	GO:0003777	microtubule motor activity	46	93	0.494624	1	5.88878e-18	1	0	KIF7_DANRE	KIF22_DANRE	B7ZV80_DANRE	E7FAN6_DANRE	X1WGN9_DANRE	A0A2R8QJ09_DANRE	F1RCT7_DANRE	E7F0X8_DANRE	E7F985_DANRE	F1QWH5_DANRE	E7F4J1_DANRE	F1QJZ1_DANRE	E7FDX9_DANRE	A0A2R8Q7G1_DANRE	F1QET8_DANRE	A0A2R8Q7J3_DANRE	E9QC56_DANRE	A0A2R8PX20_DANRE	B0UYK4_DANRE	A0A0R4IM96_DANRE	X1WDK3_DANRE	X1WFY5_DANRE	E7F2W9_DANRE	Q7ZU82_DANRE	F1QYE9_DANRE	F1QCX2_DANRE	F1QWH7_DANRE	E7F728_DANRE	F1QPR6_DANRE	A0A0R4ILH1_DANRE	F1QH25_DANRE	A0A0R4ID16_DANRE	F1Q554_DANRE	F1QZN6_DANRE	A0A2R8RWA3_DANRE	E7FCT0_DANRE	F1R5M2_DANRE	F8W409_DANRE	X1WFZ0_DANRE	A0A140LH45_DANRE
molecular_function	GO:0003774	cytoskeletal motor activity	46	90	0.511111	1	7.33907e-32	1	0	MY9AB_DANRE	B6IDE1_DANRE	I3ISA3_DANRE	F1QSE1_DANRE	B3DFS9_DANRE	X1WCS2_DANRE	A0A2R8QP15_DANRE	A0A2R8Q9D2_DANRE	A0A2R8Q8Y3_DANRE	A0A0G2L365_DANRE	F1QDH9_DANRE	F1R5Y4_DANRE	A0A2R8Q8V2_DANRE	A0A2R8QK05_DANRE	A0A2R8Q9I2_DANRE	A0A2R8QM44_DANRE	E7FE29_DANRE	A0A2R8Q4Q8_DANRE	A0A286YBM4_DANRE	B0S541_DANRE	A0A1D5NSN8_DANRE	A0A0N4STT5_DANRE	A0A2R8QG39_DANRE	E7FD18_DANRE	A0A0R4INI3_DANRE	F1QZW1_DANRE	F1R3G4_DANRE	A0A2R8Q7G9_DANRE	E9QF07_DANRE	R4GDZ5_DANRE	A0A2R8QT46_DANRE	A0A2R8Q9M0_DANRE	A0A2R8RS31_DANRE	E7F5L1_DANRE	F8W3L6_DANRE	A0A0R4J7R2_DANRE	A0A0N4SU68_DANRE	A0A2R8QHZ3_DANRE	I3ITL5_DANRE	E7F632_DANRE
molecular_function	GO:0046982	protein heterodimerization activity	45	222	0.202703	0.258649	0.791866	1	1	TAF8_DANRE	JAM2A_DANRE	MTA70_DANRE	ARNT2_DANRE	PO5F1_DANRE	OSTA_DANRE	SCRIB_DANRE	TEN3_DANRE	TEN4_DANRE	IKKA_DANRE	Q6P0F1_DANRE	B3DG00_DANRE	Q5I2A9_DANRE	Q66HZ5_DANRE	Q7T351_DANRE	Q6W4T8_DANRE	A0A2R8Q360_DANRE	Q6DGE6_DANRE	Q7ZVY3_DANRE	E7EXR7_DANRE	F1R6W8_DANRE	B8A4W6_DANRE	F1QU90_DANRE	F1QMF8_DANRE	A0A2R8Q9X1_DANRE	A0A2R8Q2H6_DANRE	F1RA92_DANRE	B8A4W5_DANRE	A0A2R8QCA3_DANRE	F1QWY1_DANRE	Q90Z98_DANRE	F1REK4_DANRE	E9QIT3_DANRE	A0A2R8Q498_DANRE	F1QGC2_DANRE	B8A4W7_DANRE	A0A2R8QT72_DANRE	F1R019_DANRE	F1QTW9_DANRE	F1QK75_DANRE
molecular_function	GO:0008289	lipid binding	45	150	0.3	0.999908	0.000123288	1	0.075	APOEB_DANRE	AP2MA_DANRE	BI2L2_DANRE	ACB5B_DANRE	AP2MB_DANRE	L0ANA2_DANRE	A5PN36_DANRE	F8W5T2_DANRE	F1QHR0_DANRE	Q1MT71_DANRE	A0A0R4IU48_DANRE	F1QJD1_DANRE	F1RD00_DANRE	B3DHC5_DANRE	A0A2R8QAF3_DANRE	E7F980_DANRE	E9QBB8_DANRE	A0A0R4IQE0_DANRE	F8W476_DANRE	A0A0R4IDS0_DANRE	E7F0X8_DANRE	A0A2R8Q0F5_DANRE	U3JAR7_DANRE	F1QCQ0_DANRE	E9QJN3_DANRE	A0A2R8Q7A5_DANRE	A0A2R8S0I9_DANRE	X1WBC3_DANRE	G1K2F5_DANRE	A0A2R8QFD1_DANRE	E7F3X8_DANRE	A0A2R8QK84_DANRE	B3DGS0_DANRE	A0A0R4IJ30_DANRE	F1Q7X0_DANRE	A0A0R4IL09_DANRE	I3IT87_DANRE	F1R3K0_DANRE	E9QJQ2_DANRE	E9QBW9_DANRE
biological_process	GO:0019221	cytokine-mediated signaling pathway	45	123	0.365854	0.0740144	0.943565	1	1	A8WH88_DANRE	A4QNT9_DANRE	B3DI57_DANRE	A0FJH8_DANRE	B8JJU1_DANRE	Q4V9B2_DANRE	A8WH93_DANRE	A0A0R4IE17_DANRE	Q8AW20_DANRE	A8WH90_DANRE	O93599_DANRE	Q6NV46_DANRE	A0A1S6L757_DANRE	A0A0R4IGF2_DANRE	A0A2R8S045_DANRE	A0A2R8QEU4_DANRE	F1RA13_DANRE	A0A2R8QPX6_DANRE	F1QMA9_DANRE	B0S790_DANRE	F8W3X1_DANRE	A0A2R8RWD9_DANRE	A0A2R8PYK0_DANRE	A0A0R4IJL4_DANRE	B0UXH1_DANRE	E7FBV9_DANRE	F1RBF1_DANRE	X1WBP3_DANRE	F1R904_DANRE	A0A2R8S073_DANRE	A8WH84_DANRE	Q68SP3_DANRE	F1QG81_DANRE	A0A0R4IP49_DANRE	F6NJE2_DANRE	A0A2R8QHS3_DANRE	A0A0R4IQ60_DANRE	F1QWX2_DANRE	A0A2R8QTS6_DANRE	A0A0R4IAL7_DANRE
cellular_component	GO:0005911	cell-cell junction	44	101	0.435644	0.999999	1.67296e-06	1	0.002	DNMBP_DANRE	SCRIB_DANRE	AMOL2_DANRE	B3DHL7_DANRE	B0CM22_DANRE	Q68EI5_DANRE	A4JYK0_DANRE	A0A2R8RHW5_DANRE	A0A2R8Q8D8_DANRE	E7F5T8_DANRE	F1Q897_DANRE	A0A2R8QJF4_DANRE	F1R1B1_DANRE	A0A2R8RKI9_DANRE	A0A2R8QSR7_DANRE	A0A0R4IWB5_DANRE	Q5VSD9_DANRE	A0A2R8PV45_DANRE	F1QWV3_DANRE	A0A140LGX4_DANRE	A0A2R8QRQ4_DANRE	A0A286YB86_DANRE	A0A2R8QBW2_DANRE	A0A2R8QD15_DANRE	A0A2R8QSV4_DANRE	A0A0R4IGA3_DANRE	F1QZB9_DANRE	A0A2R8RME3_DANRE	E9QIL2_DANRE	A0A0R4IM59_DANRE	A0A2R8QKH9_DANRE	A0A0G2KWQ2_DANRE	E7FH65_DANRE	A0A0R4IVM3_DANRE	A0A2R8QRS8_DANRE	B0S5C0_DANRE	A0A2R8QII5_DANRE	A0A2R8QKG2_DANRE	B0V1H1_DANRE	E7FGK4_DANRE
molecular_function	GO:0004888	transmembrane signaling receptor activity	44	292	0.150685	4.42764e-22	1	0	1	Q0PJT8_DANRE	E7F1E4_DANRE	A0A140LGT8_DANRE	F1QY61_DANRE	A3KQB0_DANRE	A0A140LFU5_DANRE	A0A2R8QPC5_DANRE	A0A140LFS3_DANRE	A0A286Y9K8_DANRE	F1Q6P9_DANRE	A0A0R4IW15_DANRE	A0A140LFQ2_DANRE	A0A0G2KU97_DANRE	X1WDY0_DANRE	F1QAJ3_DANRE	F1R5G4_DANRE	M9MMA9_DANRE	A0A140LGX8_DANRE	A0A2R8RJZ8_DANRE	A0A0R4IZE8_DANRE	F1QY64_DANRE	X1WBP3_DANRE	E7EYV5_DANRE	A0A0R4IB29_DANRE	R4GE33_DANRE	A0A0R4IPM4_DANRE	A0A2R8RNZ0_DANRE	F1QX89_DANRE	A0A2R8QLT6_DANRE	F1Q776_DANRE	A0A140LH70_DANRE	X1WH21_DANRE	A0A0R4IGC9_DANRE	E9QJJ6_DANRE	R4GED2_DANRE	X1WHX6_DANRE	B8A691_DANRE	F1R827_DANRE	A0A2R8Q9F3_DANRE	A0A2R8QA47_DANRE
biological_process	GO:0009887	animal organ morphogenesis	44	175	0.251429	0.999993	8.89203e-06	1	0.024	NRP1A_DANRE	TBX5A_DANRE	DISP1_DANRE	NBL1_DANRE	NEK8_DANRE	F2Z4T4_DANRE	F1RC47_DANRE	A0A0R4IFP8_DANRE	Q9I9B7_DANRE	F1QBZ9_DANRE	Q7SX66_DANRE	B3DHR9_DANRE	Q1RLY9_DANRE	F1QXE5_DANRE	A0A2R8QD21_DANRE	F1QPJ1_DANRE	E7FG88_DANRE	Q1MTD2_DANRE	A0A2R8RXG6_DANRE	X1WBU3_DANRE	F1QYU0_DANRE	A0A2R8QBS2_DANRE	F1QF92_DANRE	A0A1D5NSB6_DANRE	A0A2R8QQC5_DANRE	A0A2R8QLC3_DANRE	E7EXX6_DANRE	F1QSY5_DANRE	A0A0R4IC31_DANRE	A0A2R8RZ56_DANRE	F1Q5H5_DANRE	A0A2R8Q880_DANRE	A0A0R4II20_DANRE	A0A2R8RMW2_DANRE	F1RDN8_DANRE	A0A2R8Q9F2_DANRE	A0A2R8QAN7_DANRE	A0A2R8QMV5_DANRE	F1REL9_DANRE	E7F6C7_DANRE
biological_process	GO:0030182	neuron differentiation	44	186	0.236559	1	1.23768e-16	1	0	MIB1_DANRE	EMX1_DANRE	LHX3_DANRE	WNT5B_DANRE	MED12_DANRE	NDF1_DANRE	Q5QHS3_DANRE	B3DKL9_DANRE	Q6NYI3_DANRE	Q1LXU5_DANRE	Q503Z8_DANRE	F1R5S1_DANRE	B3DJD1_DANRE	Q8JIZ3_DANRE	Q1MT36_DANRE	B3DGA5_DANRE	Q7SX66_DANRE	Q6DEL0_DANRE	Q90264_DANRE	B6V3E1_DANRE	Q9I9I2_DANRE	B3DKD9_DANRE	A0A2R8QM70_DANRE	A0A2R8QMH8_DANRE	E7F0K1_DANRE	F6NUE7_DANRE	A0A2R8QI66_DANRE	B8A5N9_DANRE	F1R205_DANRE	A0A2R8RSI4_DANRE	A0A2R8QI31_DANRE	A0A0R4ILR3_DANRE	F1R469_DANRE	Q6P975_DANRE	F1R272_DANRE	A0A2R8QHA2_DANRE	F1QFR3_DANRE	F1Q7K7_DANRE	F1QAC4_DANRE	F1QUT5_DANRE
biological_process	GO:0071805	potassium ion transmembrane transport	44	174	0.252874	0.364901	0.68424	1	1	E7FB36_DANRE	F1QNK9_DANRE	A0A142J9E8_DANRE	Q1LY45_DANRE	B3DJX4_DANRE	E7FAT2_DANRE	A0A2R8Q685_DANRE	A0A286Y962_DANRE	I3ITL7_DANRE	A0A0R4ISS8_DANRE	A0A2R8QD65_DANRE	A0A2R8QPN6_DANRE	E9QJ94_DANRE	F1RB62_DANRE	F1QR72_DANRE	E7FFQ6_DANRE	A0A2R8Q8L4_DANRE	A8WHX9_DANRE	A0A0R4IF04_DANRE	A0A2R8Q5N6_DANRE	F1QW20_DANRE	X1WCF7_DANRE	F1R6X2_DANRE	F1R354_DANRE	X1WCE7_DANRE	E7F7K8_DANRE	A0A2R8Q8A5_DANRE	A0A0R4INU5_DANRE	E0R7P9_DANRE	A0A2R8QAI6_DANRE	A0A2R8QSA8_DANRE	A0A2R8QBX7_DANRE	B0V138_DANRE	A0A2R8QRP8_DANRE	Q1LY44_DANRE	A0A0R4IC13_DANRE	A0A2R8PYU3_DANRE	A0A2R8QD79_DANRE	F1QND4_DANRE	F1QCW6_DANRE
biological_process	GO:0007409	axonogenesis	43	142	0.302817	0.999997	4.66855e-06	1	0.015	KIF22_DANRE	CTNA2_DANRE	ELAV4_DANRE	F1QCM6_DANRE	A0A2R8QI85_DANRE	E7F0B3_DANRE	X1WDB0_DANRE	A0A140LH51_DANRE	Q6DGM5_DANRE	B2ZZ14_DANRE	F1Q828_DANRE	A0A0R4IWT9_DANRE	F1R5M4_DANRE	F1QE14_DANRE	E7FAI5_DANRE	A0A2R8QJ64_DANRE	A0A0R4ICW0_DANRE	A0A0R4IR18_DANRE	A0A0R4IF59_DANRE	X1WEZ4_DANRE	A2AWU2_DANRE	A0A2R8RWE2_DANRE	A2AWU3_DANRE	A0A0R4IPG9_DANRE	E7EZL0_DANRE	A2RRV7_DANRE	A0A0R4ISC3_DANRE	A0A0R4ISY7_DANRE	A0A0R4INK8_DANRE	A0A0R4II20_DANRE	E7F2E0_DANRE	A0A2R8Q244_DANRE	F1Q924_DANRE	A0A2R8QL98_DANRE	A2AWU1_DANRE	A0A0R4IJ40_DANRE	A0A0R4IL48_DANRE	F1R074_DANRE	A0A0H2UKL6_DANRE	A0A2R8RHN2_DANRE
biological_process	GO:0009952	anterior/posterior pattern specification	43	119	0.361345	0.999995	9.05479e-06	1	0.024	HN1BA_DANRE	KLH12_DANRE	PAX6_DANRE	NOTC1_DANRE	TBX6_DANRE	PAX2A_DANRE	DISP1_DANRE	HXC5A_DANRE	HXD3A_DANRE	HXD4A_DANRE	HXA3A_DANRE	A2CG09_DANRE	Q6PBX3_DANRE	B0V3D1_DANRE	Q9YHZ8_DANRE	F1Q9Z5_DANRE	Q6W4T8_DANRE	A0A0R4IQL7_DANRE	F1QU78_DANRE	A0A0R4INF0_DANRE	B0V3D3_DANRE	F1QWG8_DANRE	A0A2R8Q844_DANRE	Q1LWJ4_DANRE	A0A2R8QET6_DANRE	A0A2R8Q4C2_DANRE	B0V3D2_DANRE	A0A0R4IGP2_DANRE	A0A2R8QPK5_DANRE	A0A0R4IPG9_DANRE	Q90466_DANRE	B3DKC1_DANRE	A3QK40_DANRE	A0A286Y9P5_DANRE	F1QSH8_DANRE	A0A0R4IJ40_DANRE	F1R074_DANRE	A0A2R8QBB5_DANRE	B0V3D4_DANRE	A0A2R8RHN2_DANRE
biological_process	GO:0043010	camera-type eye development	42	114	0.368421	0.839272	0.183576	1	1	EGR1_DANRE	CE290_DANRE	FXC1B_DANRE	PTC1_DANRE	DLX3B_DANRE	DLX4B_DANRE	Q6W2J8_DANRE	Q7ZUN6_DANRE	B2KTE5_DANRE	Q6NY62_DANRE	F8W3X0_DANRE	A0A2R8QEU4_DANRE	A0A0R4IFH8_DANRE	F1QMA9_DANRE	F8W4E9_DANRE	A0A2R8Q844_DANRE	Q1LWJ4_DANRE	A0A2R8QK25_DANRE	A0A0A0MPG9_DANRE	A0A0R4ICW0_DANRE	A0A0R4IF59_DANRE	E9QH15_DANRE	A0A2R8Q2A2_DANRE	A0A2R8QBA1_DANRE	A0A2R8S073_DANRE	A0A0R4IGP2_DANRE	F1Q6N0_DANRE	F1QMW3_DANRE	F1RCL8_DANRE	F1QHE7_DANRE	A0A0R4ISY7_DANRE	A0A0R4INK8_DANRE	A0A0R4II20_DANRE	A0A286Y9P5_DANRE	A0A0R4IL48_DANRE	E7FGW2_DANRE	E9QFC1_DANRE	F1QG49_DANRE	A0A286YAA0_DANRE	A0A2R8QR15_DANRE
cellular_component	GO:0045211	postsynaptic membrane	42	269	0.156134	0.000282861	0.999834	0.04	1	GRD2I_DANRE	Q0PJT8_DANRE	F8W634_DANRE	E7F0B3_DANRE	Q568M9_DANRE	Q6GMH1_DANRE	A0A2R8Q685_DANRE	E7F3K3_DANRE	A0A286Y962_DANRE	E7EYT4_DANRE	E9QHL0_DANRE	A0A2R8QPN6_DANRE	R4GDN8_DANRE	F1RAQ0_DANRE	A0A286Y9K8_DANRE	A0A2R8QNR1_DANRE	A0A0H2UKN4_DANRE	A0A140LGX8_DANRE	E7EXG2_DANRE	E7FDG8_DANRE	X1WCE7_DANRE	F1R0H8_DANRE	F1QHR2_DANRE	B0V2X4_DANRE	E7EYV5_DANRE	A0A2R8QRZ7_DANRE	X1WEX9_DANRE	E7F101_DANRE	F1R366_DANRE	A0A0R4IXX0_DANRE	F1QIB3_DANRE	A0A2R8QSA8_DANRE	A0A2R8QE21_DANRE	A0A140LG95_DANRE	A0A2R8Q244_DANRE	E7F192_DANRE	R4GEC6_DANRE	A0A2R8Q9T9_DANRE	A0A2R8QLG2_DANRE	F1QXV0_DANRE
biological_process	GO:0001889	liver development	42	164	0.256098	0.759824	0.288431	1	1	SUV3_DANRE	HN1BB_DANRE	HN1BA_DANRE	FGR1A_DANRE	SC31A_DANRE	SRBP2_DANRE	YAP1_DANRE	TBXTA_DANRE	CELF1_DANRE	FADS2_DANRE	Q9W6U0_DANRE	F1R8K4_DANRE	Q4L1M9_DANRE	Q6WZB3_DANRE	Q6NYN9_DANRE	Q6NW63_DANRE	Q1L8A5_DANRE	F1RBW3_DANRE	E9QIQ3_DANRE	F1R7N7_DANRE	F1Q5T5_DANRE	A0A286YBQ8_DANRE	A0A0R4IR44_DANRE	F1RCH4_DANRE	A0A0R4IG74_DANRE	F1RDU4_DANRE	B8JL25_DANRE	A0A2R8QH43_DANRE	F2Z4S1_DANRE	A0A0R4IQK3_DANRE	E9QEC4_DANRE	F8W4Z3_DANRE	F1QYL5_DANRE	F1QZF2_DANRE	A0A2R8QTE7_DANRE	A0A0R4IB15_DANRE	A0A2R8Q9H4_DANRE	A0A0R4IWH7_DANRE	E9QEC0_DANRE	A0A2R8PZ52_DANRE
biological_process	GO:0030097	hemopoiesis	42	176	0.238636	0.945482	0.0637838	1	1	RN145_DANRE	SMAL1_DANRE	MIB1_DANRE	SPT5H_DANRE	TBPL2_DANRE	ZN148_DANRE	F1R8K4_DANRE	Q6WZB3_DANRE	E5DV48_DANRE	F1QFC0_DANRE	Q1RLV0_DANRE	E7F958_DANRE	B3DKD9_DANRE	A0A2R8Q385_DANRE	A0A0R4IVJ3_DANRE	A0A2R8QQB8_DANRE	F1QL52_DANRE	E9QCU7_DANRE	E7FF48_DANRE	F1QA53_DANRE	A0A0N4SUG1_DANRE	F1QE52_DANRE	A0A2R8RHL8_DANRE	F1R8E1_DANRE	F1QHK0_DANRE	A0A0R4IJ99_DANRE	A0A0R4IYD2_DANRE	A0A0R4IX50_DANRE	A0A0R4I9W4_DANRE	A0A286YAQ6_DANRE	F1R272_DANRE	A0A2R8RZ82_DANRE	F1R8Z8_DANRE	F1QLW8_DANRE	A0A2R8QTK3_DANRE	F8W578_DANRE	F1QNG2_DANRE	A0A2R8Q4R6_DANRE	A0A2R8Q5Y7_DANRE	A0A2R8RYT7_DANRE
cellular_component	GO:1990904	ribonucleoprotein complex	42	150	0.28	7.22068e-07	1	0	1	PIHD1_DANRE	PABPA_DANRE	CELF1_DANRE	CELF2_DANRE	ELAV4_DANRE	Q4U0V5_DANRE	Q6P124_DANRE	T1ECV3_DANRE	Q9PTK4_DANRE	B8K0D5_DANRE	Q6TGY6_DANRE	A0A0R4IWC9_DANRE	Q6GQM6_DANRE	F1QGN3_DANRE	F1QJB8_DANRE	F1R3N8_DANRE	A0A2R8QEI9_DANRE	A0A2R8QTX4_DANRE	A0A2R8Q5I8_DANRE	A0A2R8Q8X4_DANRE	A0A0R4IXJ1_DANRE	E9QH15_DANRE	A0A0R4IC33_DANRE	A0A2R8QLQ0_DANRE	E7F112_DANRE	F1R133_DANRE	F1QSG1_DANRE	F1Q6N0_DANRE	F1QGR7_DANRE	F1R0S9_DANRE	Q6P105_DANRE	Q1MT19_DANRE	F1QCR6_DANRE	A0A2R8S0A2_DANRE	A0A140LFZ6_DANRE	F1REE1_DANRE	E7FGW2_DANRE	B0S6Z1_DANRE	E9QFC1_DANRE	A0A0R4ITN4_DANRE
biological_process	GO:0045087	innate immune response	42	294	0.142857	6.36698e-10	1	0	1	CASPB_DANRE	TRAF6_DANRE	ILRUN_DANRE	N4BP1_DANRE	Q6P124_DANRE	F1Q611_DANRE	Q1LUQ2_DANRE	A2RUX1_DANRE	Q6PFT2_DANRE	Q5RJ11_DANRE	Q6DGE6_DANRE	F1QY61_DANRE	A0A0R4IKJ5_DANRE	F8W5D1_DANRE	A0A2R8QPX6_DANRE	F1QM47_DANRE	A0A2R8PYK0_DANRE	A0A0R4IW15_DANRE	A0A2R8Q7T0_DANRE	M9MMG2_DANRE	F1QY64_DANRE	Q1MT80_DANRE	E9QGS7_DANRE	M9MMF8_DANRE	A0A0R4IP49_DANRE	M9MMF9_DANRE	E7F7L0_DANRE	A0A0R4IGC9_DANRE	A0A2R8RNG3_DANRE	F6NJE2_DANRE	F8W425_DANRE	B8A691_DANRE	M9MMD8_DANRE	X1WD23_DANRE	A0A2R8QA47_DANRE	A0A2R8Q323_DANRE	X1WGQ4_DANRE	E9QB99_DANRE	A0A2R8QLW9_DANRE	A0A2R8Q5A9_DANRE
biological_process	GO:0043161	proteasome-mediated ubiquitin-dependent protein catabolic process	42	182	0.230769	0.0149826	0.988853	1	1	CRBN_DANRE	HACE1_DANRE	SMUF2_DANRE	ARMC8_DANRE	DTL_DANRE	Q7ZTZ6_DANRE	F1QKD6_DANRE	U6C7X6_DANRE	Q499B0_DANRE	A2VCZ7_DANRE	U3JA92_DANRE	E9QD96_DANRE	A0A286Y9V7_DANRE	Q1LYI3_DANRE	A0A2R8Q7I3_DANRE	F1RCH2_DANRE	F1QHZ1_DANRE	A0A0R4IFE2_DANRE	F1Q8K3_DANRE	F6P346_DANRE	X1WEK3_DANRE	F1R1A5_DANRE	A0A2R8QCL5_DANRE	F1QL68_DANRE	A0A0R4IAU6_DANRE	A0A2R8Q4L4_DANRE	A0A2R8QLH9_DANRE	A0A286YBF5_DANRE	A0A0R4IE49_DANRE	A0A2R8QG90_DANRE	E9QJL9_DANRE	F1QEG9_DANRE	E7F8Q5_DANRE	A0A0G2KVJ0_DANRE	A0A2R8RTJ0_DANRE	X1WG81_DANRE	F1QFN6_DANRE	A0A0R4IBD8_DANRE	E7F381_DANRE	F1QYQ0_DANRE
molecular_function	GO:0000976	transcription cis-regulatory region binding	42	109	0.385321	1	1.43686e-121	1	0	ARI5B_DANRE	TAF2_DANRE	RFX6_DANRE	TBXTA_DANRE	F1QDN4_DANRE	B3DJD1_DANRE	Q6P3M5_DANRE	F1Q910_DANRE	B3DJN2_DANRE	Q4U3K9_DANRE	F1QUT1_DANRE	B3DK47_DANRE	F1R9K2_DANRE	Q499A1_DANRE	A0A2R8QM70_DANRE	A0A0R4ICG0_DANRE	B0UXR5_DANRE	A0A2R8QMZ5_DANRE	K7DY37_DANRE	A0A0R4IB28_DANRE	A0A2R8Q8Q0_DANRE	A0A2R8QIE4_DANRE	Q1LXH4_DANRE	B8JL25_DANRE	Q1LV27_DANRE	A0A0R4IBR4_DANRE	Q1LXH6_DANRE	Q1LXH3_DANRE	F1R2N8_DANRE	F1QWQ1_DANRE	A0A2R8Q624_DANRE	A0A2R8QI31_DANRE	Q7SZZ4_DANRE	F1RDZ4_DANRE	F1QE20_DANRE	Q1LXI7_DANRE	A5WW46_DANRE	A0A2R8QUS2_DANRE	A0A0R4IRM3_DANRE	Q1LXH5_DANRE
cellular_component	GO:0036064	ciliary basal body	42	110	0.381818	0.999971	6.65308e-05	1	0.023	BBOF1_DANRE	FLTOP_DANRE	BBS2_DANRE	CF206_DANRE	TALD3_DANRE	OFD1_DANRE	TTLL6_DANRE	POC1B_DANRE	WDR11_DANRE	DZI1L_DANRE	DZIP1_DANRE	E7FE66_DANRE	B0UYB0_DANRE	F1QG20_DANRE	E9QDJ5_DANRE	A0A2R8QMD0_DANRE	E7F5N7_DANRE	A0A0G2LAC3_DANRE	F1Q6W8_DANRE	A0A2R8RI11_DANRE	A0A2R8PY65_DANRE	E7EXH4_DANRE	F1QVN7_DANRE	A0A0R4INC9_DANRE	E9QDJ2_DANRE	F1QSP6_DANRE	F1QAL1_DANRE	X1WH62_DANRE	A0A2R8QRB2_DANRE	E7F6M9_DANRE	F1QIV7_DANRE	A0A2R8QDU7_DANRE	F6NUK4_DANRE	F8W5U4_DANRE	A0A2R8PVC5_DANRE	F1QFD6_DANRE	A0A0R4IN23_DANRE	A0A2R8QQQ9_DANRE	A0A2R8QMH9_DANRE	A0A2R8QGU9_DANRE
molecular_function	GO:0030246	carbohydrate binding	41	258	0.158915	0.000212026	0.999873	0.057	1	COL12_DANRE	F8W3Q0_DANRE	E7F2U9_DANRE	A0A0R4ICH5_DANRE	B0R0P3_DANRE	E7EYL2_DANRE	A0A0R4IB03_DANRE	B0R0P2_DANRE	E7F1D8_DANRE	F1QYF2_DANRE	A0A0R4IGF6_DANRE	E7FCP7_DANRE	E7F6D4_DANRE	F1QE29_DANRE	A0A2R8QLX1_DANRE	A0A2R8RVG8_DANRE	A3KQ74_DANRE	F1Q6D3_DANRE	A0A0R4IRC9_DANRE	F1QAH5_DANRE	F1QDU1_DANRE	F1R4T0_DANRE	F1QEZ8_DANRE	A3KQ79_DANRE	A0A2R8QK78_DANRE	X1WHB7_DANRE	A3KQ75_DANRE	F1QUT0_DANRE	F1QTT0_DANRE	Q5RGY5_DANRE	A0A2R8QSL1_DANRE	A0A2R8QIJ8_DANRE	F1QFM9_DANRE	Q5RIZ6_DANRE	A0A0R4INM0_DANRE	F1Q6Z9_DANRE	A0A0R4IXT8_DANRE	X1WGF8_DANRE	A3KQ78_DANRE	F6NUW0_DANRE
biological_process	GO:0007626	locomotory behavior	41	124	0.330645	0.971399	0.0405509	1	1	TPP1_DANRE	MTMRC_DANRE	REST_DANRE	AMR1A_DANRE	AMR1B_DANRE	MY9AB_DANRE	F1QGX8_DANRE	Q4ZGL5_DANRE	Q4ZGL0_DANRE	Q6P3K6_DANRE	Q6PBU2_DANRE	Q4ZGK9_DANRE	F6PDA4_DANRE	F1R1G8_DANRE	A0A2R8PZA9_DANRE	A0A0R4IJ71_DANRE	A0A2R8QM62_DANRE	E7FB31_DANRE	A5WV02_DANRE	B8JHQ2_DANRE	A0A2R8QKW7_DANRE	F1Q6P3_DANRE	A0A2R8QR17_DANRE	F1QU51_DANRE	A0A0R4INC4_DANRE	E9QCV2_DANRE	A0A2R8QEG3_DANRE	A0A0G2KRC3_DANRE	A0A2R8QLG6_DANRE	A0A2R8PVX9_DANRE	A0A2R8Q829_DANRE	E7F8G7_DANRE	A0A2R8QJ58_DANRE	A0A286YBE9_DANRE	E7FD27_DANRE	F1QN07_DANRE	F1QT83_DANRE	F1QLT2_DANRE	A0A2R8QKM0_DANRE	A0A2R8RIJ1_DANRE
biological_process	GO:0055085	transmembrane transport	41	156	0.262821	5.20608e-16	1	0	1	S2543_DANRE	F1R7A8_DANRE	A0A0R4IZS1_DANRE	A0A0R4IVE7_DANRE	A0A2R8Q7A1_DANRE	A0A2R8PW04_DANRE	A0A0R4ICG1_DANRE	F1QSX6_DANRE	F1R4U2_DANRE	A0A2R8QQQ1_DANRE	A0A0R4IKC5_DANRE	F8W4N1_DANRE	E7FF59_DANRE	E7F1E3_DANRE	A0A2R8QF96_DANRE	A0A2R8RJ22_DANRE	E7EXF7_DANRE	E7EZD3_DANRE	F1QC18_DANRE	B8A698_DANRE	F1QMZ9_DANRE	A0A2R8Q8U7_DANRE	A0A2R8Q6Z4_DANRE	F6NGR0_DANRE	E7F961_DANRE	A0A2R8QDG3_DANRE	F8W367_DANRE	E7EYG0_DANRE	F6NLY2_DANRE	F8W557_DANRE	A0A2R8QGR3_DANRE	B0UXS9_DANRE	E7FAV3_DANRE	A0A2R8Q854_DANRE	F1QIF7_DANRE	A0A0R4IC81_DANRE	A0A2R8Q0U7_DANRE	E7F1Z8_DANRE	F1R5A1_DANRE	A0A140LGD8_DANRE
biological_process	GO:0042981	regulation of apoptotic process	41	177	0.231638	4.37813e-08	1	0	1	MTA70_DANRE	BAG6_DANRE	TRAF6_DANRE	FL2D_DANRE	F1QY38_DANRE	Q8JH29_DANRE	E7EXV8_DANRE	Q0VG64_DANRE	Q6DHF1_DANRE	Q1LUU4_DANRE	Q5RJ11_DANRE	A2CE85_DANRE	A0A2R8RLN8_DANRE	F1R9N7_DANRE	A0A0G2KUM0_DANRE	E7F336_DANRE	Q1MT80_DANRE	A0A2R8Q6A5_DANRE	A0A2R8RNP3_DANRE	F1R9E9_DANRE	E7EXQ0_DANRE	A0A286YA84_DANRE	A0A0R4IW08_DANRE	A0A0R4IX85_DANRE	F1QQQ8_DANRE	A0A0R4IJE4_DANRE	A0A1D5NSM6_DANRE	A0A2R8PZV7_DANRE	E7F7L0_DANRE	A0A2R8QDN7_DANRE	E7F6X3_DANRE	A0A2R8Q796_DANRE	B0UXK1_DANRE	A0A2R8Q5S6_DANRE	F1QW56_DANRE	X1WD23_DANRE	A0A2R8Q8W9_DANRE	F1R4L1_DANRE	X1WGQ4_DANRE	A0A0G2KV16_DANRE
molecular_function	GO:0045296	cadherin binding	41	109	0.376147	0.999904	0.000213646	1	0.164	CTNA2_DANRE	F1RD80_DANRE	F1QTT3_DANRE	A0A2R8Q5S4_DANRE	B0BF33_DANRE	A0A0R4ITJ9_DANRE	Q5RJ81_DANRE	F1QUV8_DANRE	A0A2R8QSE5_DANRE	B8A6A9_DANRE	A0A2R8Q0L0_DANRE	F1Q548_DANRE	E7F374_DANRE	A0A0R4IM30_DANRE	F8W4M8_DANRE	A0A2R8QDB8_DANRE	A0A0R4IFF8_DANRE	A0A0R4IQ86_DANRE	F1RBK4_DANRE	A0A286Y804_DANRE	F1RDZ7_DANRE	A0A0R4IJR6_DANRE	A0A0R4IRW1_DANRE	A0A2R8QAD2_DANRE	F1R306_DANRE	E7FC11_DANRE	E7F1W3_DANRE	E7FBR0_DANRE	E7EXI3_DANRE	A0A0R4IY18_DANRE	F1QPD8_DANRE	B0V2S9_DANRE	Q9PVF8_DANRE	A0A286Y8G3_DANRE	A0A2R8QFR7_DANRE	E7FC99_DANRE	B0V2S8_DANRE	X1WE89_DANRE	A0A2R8QT80_DANRE	A0A0R4IL00_DANRE
biological_process	GO:0007010	cytoskeleton organization	40	103	0.38835	1	3.44904e-26	1	0	MCA3B_DANRE	CAM1B_DANRE	MCA3A_DANRE	MCA2B_DANRE	ZRN1B_DANRE	RANB9_DANRE	Q7ZUY8_DANRE	Q6YBS2_DANRE	A0A2R8QNC7_DANRE	A0A2R8RQ90_DANRE	F1QG48_DANRE	E7EYW1_DANRE	X1WGY4_DANRE	A0A2R8Q7F4_DANRE	U3JB13_DANRE	E9QJ97_DANRE	A0A2R8QN12_DANRE	E7F765_DANRE	A0A2R8PZ58_DANRE	E7F4B3_DANRE	B0R118_DANRE	E7F0L8_DANRE	B8JMD0_DANRE	A0A2R8QDB0_DANRE	E7F165_DANRE	E7F145_DANRE	A0A2R8QD85_DANRE	A0A2R8RZE0_DANRE	A0A2R8QCB2_DANRE	A0A2R8RSE1_DANRE	A0A2R8Q7D9_DANRE	E7F2W3_DANRE	A0A2R8QTX0_DANRE	A0A2R8Q0B7_DANRE	E7F723_DANRE	E9QBL4_DANRE	F1QEQ5_DANRE	A0A2R8PXK0_DANRE	X1WHT9_DANRE	A0A2R8QT92_DANRE
cellular_component	GO:0016607	nuclear speck	40	157	0.254777	0.883697	0.15695	1	1	MTA70_DANRE	PSM4A_DANRE	SHP2A_DANRE	SE1BA_DANRE	MSL1_DANRE	SART3_DANRE	TRIPC_DANRE	PATL1_DANRE	STPAP_DANRE	PSM4B_DANRE	ASCC3_DANRE	FL2D_DANRE	Q6P022_DANRE	Q9PUT7_DANRE	Q802Y1_DANRE	F1QF98_DANRE	F1R2P7_DANRE	A0A2R8QM84_DANRE	A0A0R4IMP0_DANRE	F1QGS3_DANRE	A0A0J9YJ24_DANRE	F1QT45_DANRE	E7F8Y4_DANRE	F1QXR2_DANRE	A0A0R4IDS3_DANRE	I3ITB5_DANRE	A0A2R8QGL1_DANRE	I3ITA8_DANRE	E7F2E1_DANRE	F1Q6L6_DANRE	E9QDD5_DANRE	F1QVD2_DANRE	Q5SPH1_DANRE	A0A0R4IYA4_DANRE	A0A0R4IPF5_DANRE	A0A0R4ILC0_DANRE	E7F0M7_DANRE	A0A0R4IKI2_DANRE	A0A2R8QEH0_DANRE	A0A2R8QH85_DANRE
molecular_function	GO:0005249	voltage-gated potassium channel activity	40	147	0.272109	0.466276	0.599219	1	1	E7FB36_DANRE	F1QNK9_DANRE	A0A142J9E8_DANRE	B3DJX4_DANRE	A0A2R8Q685_DANRE	F1Q9L9_DANRE	F6NYL9_DANRE	A0A286Y962_DANRE	I3ITL7_DANRE	A0A0R4ISS8_DANRE	A0A2R8QD65_DANRE	A0A2R8QPN6_DANRE	E9QJ94_DANRE	F1RB62_DANRE	A0A2R8RUK8_DANRE	E7FFQ6_DANRE	A0A2R8Q8L4_DANRE	A8WHX9_DANRE	A0A2R8Q5N6_DANRE	X1WCF7_DANRE	X1WCE7_DANRE	E7F7K8_DANRE	A0A2R8Q8A5_DANRE	A0A2R8QJR0_DANRE	F8W294_DANRE	E7FBM0_DANRE	A0A2R8Q2R0_DANRE	F1Q9R9_DANRE	E0R7P9_DANRE	A0A2R8QAI6_DANRE	A0A2R8QSA8_DANRE	B0V138_DANRE	A0A2R8QRP8_DANRE	A0A2R8QD79_DANRE	F1QCW6_DANRE	A0A2R8Q9T9_DANRE	A0A2R8QRD5_DANRE	A0A2R8QLG2_DANRE	A0A2R8QUS8_DANRE	E7F3Z3_DANRE
cellular_component	GO:0005938	cell cortex	40	139	0.28777	1	6.92736e-09	1	0	NSMF_DANRE	TRAF6_DANRE	AMOL2_DANRE	Q6NYJ1_DANRE	Q6TNS1_DANRE	B8JMD7_DANRE	B0UXN4_DANRE	F1Q966_DANRE	A0A2R8RLV5_DANRE	X1WE04_DANRE	A0A0R4IFF8_DANRE	A0A2R8QNL6_DANRE	F1RA35_DANRE	A0A0R4IQ86_DANRE	A0A0R4IJR6_DANRE	A0A2R8PYU5_DANRE	F1QFV1_DANRE	A0A2R8Q450_DANRE	A0A2R8QNP2_DANRE	F1QU06_DANRE	A0A2R8QHG8_DANRE	A5WW50_DANRE	F1R1J6_DANRE	Q9PVF8_DANRE	E7F0G8_DANRE	A0A2R8RHI1_DANRE	E7FE96_DANRE	A0A2R8Q7H2_DANRE	A0A0G2KGW1_DANRE	K7DYG8_DANRE	A0A2R8QPP0_DANRE	E7F8H1_DANRE	A0A2R8Q3I4_DANRE	A0A0R4IL00_DANRE	F1QJB0_DANRE	E9QHC8_DANRE	E9QJB3_DANRE	E9QFS3_DANRE	A0A2R8QFQ8_DANRE	A0A2R8Q847_DANRE
cellular_component	GO:0005871	kinesin complex	40	91	0.43956	0.999999	3.95779e-06	1	0.002	KIF7_DANRE	KIF22_DANRE	E7FAN6_DANRE	X1WGN9_DANRE	F1RCT7_DANRE	E7F0X8_DANRE	E7F985_DANRE	F1QWH5_DANRE	E7F4J1_DANRE	F1QJZ1_DANRE	E7FDX9_DANRE	A0A2R8Q7G1_DANRE	F1QET8_DANRE	E9QC56_DANRE	B0UYK4_DANRE	A0A0R4IM96_DANRE	X1WDK3_DANRE	X1WFY5_DANRE	E7F2W9_DANRE	Q7ZU82_DANRE	F1QYE9_DANRE	F1QCX2_DANRE	F1QWH7_DANRE	E7F728_DANRE	A0A0R4ILH1_DANRE	A0A0R4ID16_DANRE	F1Q554_DANRE	F1QZN6_DANRE	A0A2R8RWA3_DANRE	E7FCT0_DANRE	F1R5M2_DANRE	F8W409_DANRE	X1WFZ0_DANRE	A0A140LH45_DANRE	F1QP72_DANRE	F1RAK1_DANRE	E7F084_DANRE	A0A286YBE6_DANRE	A0A2R8QSN8_DANRE	A0A2R8QTR7_DANRE
cellular_component	GO:0005882	intermediate filament	40	91	0.43956	0.999994	1.56288e-05	1	0.006	NEST_DANRE	K1C18_DANRE	F6P9T1_DANRE	Q6DG66_DANRE	Q1LX72_DANRE	A8E5I2_DANRE	Q6DHB6_DANRE	Q1RLR3_DANRE	Q6DBU4_DANRE	A0A2R8QI68_DANRE	B0BF33_DANRE	Q6P0Z0_DANRE	A5WUY5_DANRE	Q6NYL7_DANRE	Q5RJ81_DANRE	A0A2R8RV77_DANRE	E7F0F1_DANRE	A0A0N4SUF2_DANRE	F1QR21_DANRE	E7FC27_DANRE	A0A0R4ITV7_DANRE	A0A2R8QGM4_DANRE	E7F645_DANRE	F1Q7G3_DANRE	Q6DHU3_DANRE	F6P9S6_DANRE	F1R4A8_DANRE	F1R8U0_DANRE	E9QFD5_DANRE	A2BF93_DANRE	F1QEW2_DANRE	F1QP28_DANRE	F1RA90_DANRE	A0A2R8Q632_DANRE	Q1LXJ8_DANRE	F1QQ61_DANRE	A0A2R8QD52_DANRE	A0A2R8Q2D3_DANRE	E7FAL7_DANRE	A0A2R8PXK4_DANRE
molecular_function	GO:0005201	extracellular matrix structural constituent	40	172	0.232558	0.590301	0.479233	1	1	CRA1B_DANRE	B3DLK0_DANRE	Q2LDA1_DANRE	F1QMQ8_DANRE	A0A2R8RNY2_DANRE	A0A286YAI0_DANRE	E7EYI4_DANRE	E9QDK3_DANRE	Q5SPR1_DANRE	A0A0R4IR20_DANRE	F1QM25_DANRE	A0A2R8QFF2_DANRE	A0A2R8QKA3_DANRE	A0A0R4IMA3_DANRE	F1QYN1_DANRE	A0A2R8RXG6_DANRE	F1QT86_DANRE	X1WFR7_DANRE	A0A0R4IHB0_DANRE	F1QWI9_DANRE	C0H5W1_DANRE	A0A0R4IFJ5_DANRE	K7DYA5_DANRE	F1QU19_DANRE	A0A0R4II20_DANRE	F1QAB3_DANRE	A0A0R4INV6_DANRE	A0A1L1QZU7_DANRE	A0A0G2KQ62_DANRE	A5WUJ9_DANRE	F8W5B3_DANRE	E7EXE7_DANRE	F1R0N1_DANRE	A0A2R8QMV5_DANRE	E9QEJ2_DANRE	F1REL9_DANRE	F1QT12_DANRE	A0A2R8QTC7_DANRE	F1QK57_DANRE	E7EYF6_DANRE
biological_process	GO:0060429	epithelium development	40	95	0.421053	1	1.28051e-12	1	0	A1IJT6_DANRE	Q0II00_DANRE	A4QNT9_DANRE	D1YT98_DANRE	Q8AW20_DANRE	Q6DGE6_DANRE	B0S576_DANRE	B3DKD9_DANRE	A0A2R8S045_DANRE	A0A2R8PV28_DANRE	B0S790_DANRE	X1WF08_DANRE	F8W3X1_DANRE	A0A2R8RWD9_DANRE	A0A2R8Q5H5_DANRE	E7F069_DANRE	E7FBV9_DANRE	B5DE34_DANRE	Q68SP3_DANRE	E7EYK0_DANRE	F1R272_DANRE	A0A2R8QGW7_DANRE	A0A0R4IEG2_DANRE	A0A0G2L067_DANRE	A0A2R8QFM2_DANRE	X1WBC4_DANRE	E7F9Z5_DANRE	F1QXN5_DANRE	F1QMI6_DANRE	A0A2R8RJY5_DANRE	A0A2R8RKG0_DANRE	B0S6U6_DANRE	F1QWX2_DANRE	A0A0R4IIR4_DANRE	E7F059_DANRE	A0A2R8QTS6_DANRE	A0A2R8Q947_DANRE	B0S577_DANRE	E7FE12_DANRE	E7FCP0_DANRE
biological_process	GO:0008284	positive regulation of cell population proliferation	39	173	0.225434	0.0918421	0.931223	1	1	MIB1_DANRE	FGR1A_DANRE	PAX6_DANRE	TBX6L_DANRE	MYCA_DANRE	F1R5S1_DANRE	A0A2R8Q0D8_DANRE	Q7SX66_DANRE	F1QDI6_DANRE	B3DHR9_DANRE	B8ZHI7_DANRE	F8W3W7_DANRE	F1R7N7_DANRE	E7FBB3_DANRE	F1Q5T5_DANRE	A0A2R8RHW9_DANRE	E7FD22_DANRE	F1QDE6_DANRE	A0A286YBQ8_DANRE	F1QP50_DANRE	G1K2P2_DANRE	B8JKS6_DANRE	A0A0A0MPK4_DANRE	A0A2R8QQ09_DANRE	A0A0R4IQK3_DANRE	F1QEZ7_DANRE	A0A2R8QRD6_DANRE	F1QYI3_DANRE	A8WH84_DANRE	F1QAD6_DANRE	F1QSK6_DANRE	A0A2R8RPQ4_DANRE	A0A2R8S059_DANRE	F1QV06_DANRE	A0A2R8PZ52_DANRE	G1K2P7_DANRE	A0A2R8PYF1_DANRE	E9QC99_DANRE	F1QS30_DANRE
molecular_function	GO:0060090	molecular adaptor activity	39	115	0.33913	1	2.74085e-07	1	0	DLGP1_DANRE	DZIP1_DANRE	CNOT1_DANRE	B0BF33_DANRE	E7F6K9_DANRE	E7FAC5_DANRE	F1QN90_DANRE	E9QGC4_DANRE	X1WHJ1_DANRE	Q5RJ81_DANRE	A0A0R4ITW6_DANRE	A0A2R8PZH5_DANRE	U3JA74_DANRE	A0A2R8QA68_DANRE	A0A2R8Q3Q7_DANRE	A0A0G2KQA6_DANRE	A0A286YB86_DANRE	F8W2U4_DANRE	E7F7X5_DANRE	A0A0R4IGT8_DANRE	Q1L8T7_DANRE	F1QWU9_DANRE	A0A0R4IWJ1_DANRE	F1QZB9_DANRE	F1R3Y1_DANRE	X1WG76_DANRE	A0A2R8RMB3_DANRE	F1QCM5_DANRE	A0A2R8RMX2_DANRE	A0A2R8Q768_DANRE	A8E7E7_DANRE	A0A0R4IM82_DANRE	A0A0R4IVK0_DANRE	E7FFB1_DANRE	A0A2R8Q3D0_DANRE	E7FFM2_DANRE	I3ISP1_DANRE	A0A2R8Q3Z7_DANRE	A0A0G2KGQ6_DANRE
cellular_component	GO:0005768	endosome	39	239	0.16318	0.963945	0.0433263	1	1	P4K2B_DANRE	P4K2A_DANRE	RFP4A_DANRE	RFIP3_DANRE	VPS36_DANRE	OCAD1_DANRE	Q498P3_DANRE	Q7ZUY8_DANRE	Q5U3J4_DANRE	Q4VA89_DANRE	A5D6T0_DANRE	E7F3M4_DANRE	F1QY61_DANRE	F1RB27_DANRE	F1R226_DANRE	A0A0G2KGM8_DANRE	B0R118_DANRE	A0A2R8QJD2_DANRE	A0A140LGW1_DANRE	A0A2R8RKF4_DANRE	E9QDA3_DANRE	F1QA18_DANRE	E7F4L4_DANRE	A0A2R8Q3S1_DANRE	F1Q9F3_DANRE	A0A0R4IYK8_DANRE	F1QHB9_DANRE	A0A2R8QPQ6_DANRE	A0A2R8Q447_DANRE	A0A2R8QEF2_DANRE	F8W5C6_DANRE	A2CEX5_DANRE	A0A2R8QA47_DANRE	A0A2R8Q7A8_DANRE	A0A0R4IIW6_DANRE	F8W4V1_DANRE	F1QHJ5_DANRE	A0A2R8QCK2_DANRE	F1Q734_DANRE
biological_process	GO:0006397	mRNA processing	39	257	0.151751	1.33039e-05	0.999991	0.009	1	PABPA_DANRE	RFOX1_DANRE	TDRD3_DANRE	ZN326_DANRE	FL2D_DANRE	ELAV4_DANRE	E9QJN4_DANRE	Q6P022_DANRE	B3DJY4_DANRE	A0A0R4IT73_DANRE	I3ISD3_DANRE	A0A2R8RPE6_DANRE	A0A0R4IMP0_DANRE	F1QGS3_DANRE	A0A2R8RXA1_DANRE	I3ISM5_DANRE	A0A0R4IV43_DANRE	X1WG14_DANRE	F1QT45_DANRE	U3JA78_DANRE	E7F8Y4_DANRE	A0A2R8QG59_DANRE	F8W2E8_DANRE	A0A0R4IAI1_DANRE	A0A2R8Q3L5_DANRE	F1QYL2_DANRE	F1R3T3_DANRE	F1RDB0_DANRE	G1K2G6_DANRE	F1QA29_DANRE	A0A2R8RRH1_DANRE	A8WHX2_DANRE	F1R2L8_DANRE	F1QVD2_DANRE	A0A2R8Q9N3_DANRE	E7EXP6_DANRE	A0A286YA75_DANRE	A0A0R4ISJ3_DANRE	F1Q6G0_DANRE
cellular_component	GO:0042383	sarcolemma	39	90	0.433333	0.999999	1.47801e-06	1	0.002	A0A2R8Q685_DANRE	A0A2R8PZA9_DANRE	A0A0R4IJ71_DANRE	A0A0R4IK22_DANRE	A5WV02_DANRE	A0A2R8QPN6_DANRE	F1QCK4_DANRE	F1R7V2_DANRE	F8W5K5_DANRE	A0A0R4IKT8_DANRE	F1QDK4_DANRE	A0A2R8QKW7_DANRE	F1QEX9_DANRE	A0A2R8QR17_DANRE	A0A0R4INC4_DANRE	X1WCE7_DANRE	E9QCV2_DANRE	F1R0H8_DANRE	Q5RGQ4_DANRE	A0A2R8QEG3_DANRE	A0A2R8QLG6_DANRE	A0A0R4IFE8_DANRE	A0A2R8PVX9_DANRE	A0A0R4IWG7_DANRE	E7F8G7_DANRE	A0A0R4IXU9_DANRE	A0A0R4IXX0_DANRE	A0A286YBE9_DANRE	A0A2R8QSA8_DANRE	A0A0R4IA72_DANRE	A0A2R8Q9T9_DANRE	A0A2R8QLG2_DANRE	A0A2R8RIJ1_DANRE	E7F4T0_DANRE	A0A2R8QS07_DANRE	B8JI51_DANRE	A0A0R4IF13_DANRE	F1QXP9_DANRE	F1QC58_DANRE
biological_process	GO:0051726	regulation of cell cycle	38	158	0.240506	0.0810934	0.929827	1	1	MDM2_DANRE	CCDB1_DANRE	LIN9_DANRE	PHR4A_DANRE	UBP16_DANRE	RFP4A_DANRE	PHR4B_DANRE	DTL_DANRE	Q6NZT5_DANRE	Q803N1_DANRE	Q7T0K2_DANRE	B0R0S8_DANRE	B0S576_DANRE	B0R0S9_DANRE	X1WE29_DANRE	B0V229_DANRE	E7FBD0_DANRE	F1Q8S7_DANRE	B0V228_DANRE	A0A0R4ISQ1_DANRE	A0A2R8Q1U4_DANRE	A0A0R4IWM8_DANRE	A0A0G2KHX4_DANRE	A2BFC8_DANRE	A0A2R8QQY4_DANRE	A0A286Y892_DANRE	A0A2R8RI46_DANRE	F8W4Z3_DANRE	E7FEJ0_DANRE	A0A2R8QQL1_DANRE	A0A0R4IWH7_DANRE	F1QK82_DANRE	B0S577_DANRE	A0A2R8QHE1_DANRE	A0A2R8RRT2_DANRE	A0A2R8Q800_DANRE	A0A2R8QEH0_DANRE	A0A0J9YJD1_DANRE
cellular_component	GO:0005802	trans-Golgi network	38	174	0.218391	0.896056	0.136541	1	1	P4K2B_DANRE	RELCH_DANRE	P4K2A_DANRE	WDR11_DANRE	CLAP2_DANRE	Q7SZZ7_DANRE	B8A5X2_DANRE	Q2TTK0_DANRE	Q567Y3_DANRE	A8E5B0_DANRE	A0A2R8QU65_DANRE	A0A286Y806_DANRE	A0A2R8PZL9_DANRE	F1R226_DANRE	I3ITM6_DANRE	F1R027_DANRE	A0A0R4IC01_DANRE	A0A2R8RKF4_DANRE	A0A0R4INR0_DANRE	A0A0R4IBI3_DANRE	A0A0R4IK69_DANRE	A0A2R8Q6K4_DANRE	A0A2R8RKH5_DANRE	Q08BV9_DANRE	E7FFK0_DANRE	A0A2R8Q3S1_DANRE	F1QHB9_DANRE	A0A0J9YIY8_DANRE	A0A2R8QPQ6_DANRE	A0A0R4IZC8_DANRE	E7F2H4_DANRE	A0A2R8Q447_DANRE	A0A2R8Q8E5_DANRE	A2CEX5_DANRE	A0A2R8RML2_DANRE	X1WD61_DANRE	A0A2R8Q7A8_DANRE	A0A2R8QCK2_DANRE
molecular_function	GO:0004252	serine-type endopeptidase activity	38	393	0.0966921	2.96781e-11	1	0	1	TPP1_DANRE	D3GE88_DANRE	Q6DBR1_DANRE	B5DDZ4_DANRE	F1QXD8_DANRE	A0A0R4IA13_DANRE	F8W5P2_DANRE	A0A0A0MPS1_DANRE	A0A0R4IGA1_DANRE	A0A0R4IIK0_DANRE	F1R027_DANRE	F1QKL3_DANRE	A0A1L1QZP6_DANRE	A5PF55_DANRE	A0A2R8QSL0_DANRE	F1QX88_DANRE	E9QD17_DANRE	A0A2R8QCB7_DANRE	F1RCV9_DANRE	F1QE83_DANRE	A0A2R8Q7C4_DANRE	B8JJX2_DANRE	F1QHZ9_DANRE	G1K2P6_DANRE	A0A0G2KVK9_DANRE	A0A493VU28_DANRE	A0A2R8RZP1_DANRE	A0A0R4ISR9_DANRE	F1QNJ6_DANRE	X1WH68_DANRE	A0A2R8QIM0_DANRE	A0A0G2KZR4_DANRE	A0A2R8QI08_DANRE	F1Q9Z9_DANRE	X1WC56_DANRE	E7FDS3_DANRE	E7EYC5_DANRE	F1QTY6_DANRE
biological_process	GO:0042391	regulation of membrane potential	38	205	0.185366	0.0030195	0.997982	0.941	1	E7FB36_DANRE	F1QNK9_DANRE	Q08CV1_DANRE	A0A142J9E8_DANRE	Q0PJT8_DANRE	B3DJX4_DANRE	Q568M9_DANRE	S5TZ97_DANRE	E7EYT4_DANRE	I3ITL7_DANRE	E9QHL0_DANRE	A0A2R8QD65_DANRE	E9QJ94_DANRE	A0A286Y9K8_DANRE	A0A2R8Q8L4_DANRE	A8WHX9_DANRE	A0A2R8Q5N6_DANRE	F1R5G4_DANRE	X1WCF7_DANRE	A0A140LGX8_DANRE	A0A2R8Q4Y5_DANRE	E7F7K8_DANRE	F1QHR2_DANRE	A0A2R8Q8A5_DANRE	E7EYV5_DANRE	R4GEU8_DANRE	E7F101_DANRE	F1R366_DANRE	F1RCJ3_DANRE	F1R0Z6_DANRE	E9QHR1_DANRE	X1WH21_DANRE	F1QVX7_DANRE	X1WHX6_DANRE	A0A2R8Q3C0_DANRE	B0V138_DANRE	A0A0R4IIE4_DANRE	A0A2R8QE86_DANRE
molecular_function	GO:0050839	cell adhesion molecule binding	38	101	0.376238	0.999992	1.40202e-05	1	0.013	TEN3_DANRE	TEN4_DANRE	B3DHL7_DANRE	B0CM22_DANRE	A0A2R8Q360_DANRE	A4JYK0_DANRE	A0A2R8QB05_DANRE	B0UXH8_DANRE	F6PEN0_DANRE	U3JA65_DANRE	F1QU90_DANRE	E7F6J8_DANRE	A0A2R8RKI9_DANRE	F8W4Q1_DANRE	F1QWV3_DANRE	F1RA92_DANRE	A0A140LGX4_DANRE	A0A2R8QRQ4_DANRE	E7FBB9_DANRE	A0A2R8PX20_DANRE	A0A2R8QMK9_DANRE	E7F2W2_DANRE	F1RC82_DANRE	A0A2R8RME3_DANRE	A0A2R8QKH9_DANRE	A0A2R8Q396_DANRE	A0A2R8Q498_DANRE	E9QET4_DANRE	F1QTW9_DANRE	A0A1D5NSN9_DANRE	F1QAU9_DANRE	F1QK75_DANRE	B0V1H1_DANRE	E7FGK4_DANRE	E7F4R0_DANRE	A0A0R4IT86_DANRE	A0A286Y8Z9_DANRE	A0A140LFP0_DANRE
biological_process	GO:0016579	protein deubiquitination	38	127	0.299213	0.958594	0.0586892	1	1	UBP33_DANRE	UBP13_DANRE	UBP37_DANRE	B7ZDA8_DANRE	F1QY38_DANRE	Q4FE55_DANRE	F8W3X0_DANRE	H9KUW6_DANRE	A0A2R8QUB8_DANRE	E7F4N9_DANRE	A0A2R8QB18_DANRE	A0A2R8Q3R9_DANRE	U3JAF0_DANRE	A0A0R4IFT8_DANRE	A0A0H2UKG5_DANRE	A0A0R4IM95_DANRE	A0A2R8RR17_DANRE	A0A2R8RHY7_DANRE	A0A0R4IB93_DANRE	E9QC12_DANRE	F1QNF4_DANRE	E7FD00_DANRE	F1QHE7_DANRE	E7F6P1_DANRE	F1RCS0_DANRE	A0A0G2KWQ2_DANRE	A0A2R8QST4_DANRE	A0A2R8Q2V8_DANRE	F1RBA1_DANRE	A0A0G2KYP4_DANRE	E7FD72_DANRE	B7ZDA9_DANRE	E7FCR5_DANRE	E7EZD6_DANRE	F1Q6K1_DANRE	A0A2R8QH83_DANRE	E7EY58_DANRE	A0A2R8QEF9_DANRE
molecular_function	GO:0003724	RNA helicase activity	37	102	0.362745	0.998726	0.00250431	1	0.88	SUV3_DANRE	DDX55_DANRE	DDX51_DANRE	TDRD9_DANRE	RENT1_DANRE	ASCC3_DANRE	DDX20_DANRE	F1QND0_DANRE	E7F1G8_DANRE	Q6DRE7_DANRE	F1QU72_DANRE	E7FD91_DANRE	F1R080_DANRE	E7FCG0_DANRE	F1QPH6_DANRE	A0A0R4IA19_DANRE	E7F7R7_DANRE	E7F525_DANRE	F1R3T3_DANRE	F6NN58_DANRE	B0S754_DANRE	A0A2R8Q6L8_DANRE	F1R2L8_DANRE	F1QZG8_DANRE	F1R881_DANRE	A0A2R8QML1_DANRE	F1QLW8_DANRE	F1Q5L6_DANRE	A0A2R9YJN8_DANRE	A0A0G2KIQ1_DANRE	A0A286Y8Y8_DANRE	B0S6Z1_DANRE	F1R1C1_DANRE	B8A5H7_DANRE	A0A2R8RPB8_DANRE	E7F7E3_DANRE	A0A286Y8P8_DANRE
cellular_component	GO:0005930	axoneme	37	82	0.45122	1	9.58894e-10	1	0	DAAF1_DANRE	CCD39_DANRE	CF206_DANRE	WDR11_DANRE	DRC2_DANRE	DRC1_DANRE	B0UYB0_DANRE	F1QG20_DANRE	E9QDJ5_DANRE	A0A0R4IED0_DANRE	A0A2R8RQB1_DANRE	F1Q6W8_DANRE	A0A2R8PY65_DANRE	F1QW87_DANRE	F1QVN7_DANRE	A0A1D5NT12_DANRE	I3ITD2_DANRE	F1Q654_DANRE	E7F294_DANRE	E9QG33_DANRE	A2BG35_DANRE	A0A2R8QRB2_DANRE	F1QEM0_DANRE	A0A2R8Q441_DANRE	A0A2R8QP75_DANRE	F1QIV7_DANRE	E7FGT8_DANRE	F1RAF1_DANRE	A0A2R8QDU7_DANRE	A0A0G2L8X4_DANRE	E7F630_DANRE	A0A2R8QQQ9_DANRE	E7F542_DANRE	A0A2R8QMH9_DANRE	F1QLA3_DANRE	A0A2R8QGU9_DANRE	F1R185_DANRE
biological_process	GO:0002244	hematopoietic progenitor cell differentiation	37	105	0.352381	0.998316	0.00268252	1	0.982	NPS4L_DANRE	MIB1_DANRE	NOTC1_DANRE	SE1BA_DANRE	VGFR3_DANRE	DLLC_DANRE	Q802C8_DANRE	B0UYB0_DANRE	B3DKP1_DANRE	D0FH56_DANRE	O93616_DANRE	E7EYW7_DANRE	F1QCA7_DANRE	F1QBD0_DANRE	A0A2R8QUG9_DANRE	A0A2R8QH43_DANRE	A0A0R4IPF2_DANRE	F1QVN7_DANRE	X1WFM6_DANRE	E7F445_DANRE	B8A5T9_DANRE	A0A2R8Q4T2_DANRE	F1QH22_DANRE	A0A2R8Q193_DANRE	A0A2R8QRB2_DANRE	A0A0R4IHI9_DANRE	F1R0R1_DANRE	F6P9Q3_DANRE	A0A2R8QDU7_DANRE	A0A0R4INM9_DANRE	X1WBY5_DANRE	F1QZF2_DANRE	B8A5K6_DANRE	F1RCN2_DANRE	A0A2R8Q5T2_DANRE	A5WUN6_DANRE	F1QGL1_DANRE
cellular_component	GO:0031982	vesicle	37	117	0.316239	0.998021	0.00237464	1	0.637	GGYF2_DANRE	DCTN2_DANRE	A0A2R9YJG3_DANRE	Q9DGG8_DANRE	D3KVM2_DANRE	F1QKS0_DANRE	A0A2R8Q8N4_DANRE	F8W622_DANRE	E7F106_DANRE	Q1LXI2_DANRE	F1R4R9_DANRE	A0A2R8QUR4_DANRE	F1R527_DANRE	B0S6F2_DANRE	A0A286YAD0_DANRE	A0A2R8QSJ9_DANRE	A0A0R4IPW9_DANRE	E7FDV0_DANRE	A0A2R8RZK3_DANRE	A0A0R4IXQ5_DANRE	E7FGA0_DANRE	F8W4K6_DANRE	E9QCU8_DANRE	F1Q6Q6_DANRE	E9QEL6_DANRE	F1R7P5_DANRE	F1QYX4_DANRE	E7FB39_DANRE	F1QIJ5_DANRE	A0A286Y9F5_DANRE	A0A1D5NS66_DANRE	A0A0R4IW90_DANRE	A0A0R4IB90_DANRE	A0A2R8QQJ0_DANRE	E7FCI5_DANRE	A0A286YAA1_DANRE	E9QFU5_DANRE
cellular_component	GO:0030286	dynein complex	37	59	0.627119	1	2.92805e-09	1	0	DCTN2_DANRE	F1R672_DANRE	F1R0W9_DANRE	F1Q6J7_DANRE	A0A0R4IY79_DANRE	E9QBH9_DANRE	A0A2R8RQB1_DANRE	A0A0R4IHI4_DANRE	F6PC33_DANRE	F1QB07_DANRE	A0A2R8QB87_DANRE	E9QH47_DANRE	K7DY80_DANRE	A0A2R8Q6Y8_DANRE	A0A1D5NT12_DANRE	A0A2R8QMF4_DANRE	I3ITD2_DANRE	A0A2R8QCS6_DANRE	A2BG35_DANRE	A0A2R8QP75_DANRE	E7FGT8_DANRE	A0A2R8RP20_DANRE	A0A286YA27_DANRE	E7FGS8_DANRE	F1RAF1_DANRE	F1Q8L1_DANRE	A0A0G2L009_DANRE	A0A0R4IW36_DANRE	F1QA97_DANRE	A0A2R8QBQ8_DANRE	E7EZB9_DANRE	E9QF92_DANRE	A0A2R8RL41_DANRE	F1QLA3_DANRE	A0A2R8Q3X2_DANRE	A0A2R8QG79_DANRE	F1R185_DANRE
biological_process	GO:0016055	Wnt signaling pathway	36	134	0.268657	0.833626	0.193235	1	1	INVS_DANRE	DACT1_DANRE	DAPLE_DANRE	AP2MA_DANRE	KLH12_DANRE	NPHP3_DANRE	AXIN2_DANRE	NKD2_DANRE	NKD2L_DANRE	TBXTA_DANRE	NKD1_DANRE	ZRN1B_DANRE	AMOL2_DANRE	AMER1_DANRE	CHD8_DANRE	NDRG2_DANRE	AP2MB_DANRE	AGRA2_DANRE	Q9W6E3_DANRE	Q90Y37_DANRE	E7F958_DANRE	E7EYJ6_DANRE	A0A2R8PX38_DANRE	F1Q6J9_DANRE	A0A288CG34_DANRE	A0A0R4IHT4_DANRE	A0A286YAQ6_DANRE	A0A2R8RZ82_DANRE	B8A6E8_DANRE	E7FH24_DANRE	E7F064_DANRE	A0A2R8Q3U7_DANRE	A0A2R8Q4R6_DANRE	A0A2R8Q5Y7_DANRE	A0A1I7Q3W8_DANRE	F1QI44_DANRE
biological_process	GO:0006887	exocytosis	36	172	0.209302	0.273637	0.764889	1	1	MCA3B_DANRE	MCA3A_DANRE	Q6PHV0_DANRE	Q6IQP2_DANRE	E7EY52_DANRE	Q7ZV18_DANRE	A0A2R8Q685_DANRE	F6NFN1_DANRE	A0A2U3TW42_DANRE	A0A2R8RWS3_DANRE	A0A2R9YJJ4_DANRE	A0A0R4IRH4_DANRE	A0A2R8QPN6_DANRE	T1ECS7_DANRE	B8JJU3_DANRE	A0A2R8QIF2_DANRE	A0A0R4IXG8_DANRE	A0A286Y9I3_DANRE	R4GE71_DANRE	X1WCE7_DANRE	E7F2P0_DANRE	A0A2R8QH10_DANRE	B0V0Y6_DANRE	A0A2R8QSA8_DANRE	X1WGN8_DANRE	E7F1L2_DANRE	A0A2R8Q9T9_DANRE	F1QEI6_DANRE	E9QC02_DANRE	A0A2R8QLG2_DANRE	A0A2R8QJT7_DANRE	Q1MTI1_DANRE	F1Q6Q7_DANRE	E9QEQ0_DANRE	A0A2R8QFW8_DANRE	F1QFP8_DANRE
cellular_component	GO:0030018	Z disc	36	155	0.232258	0.700917	0.368745	1	1	SPEG_DANRE	Q7ZTZ6_DANRE	F1QGX8_DANRE	Q4ZGL5_DANRE	Q4ZGL0_DANRE	F1QSU4_DANRE	Q8AX99_DANRE	Q4ZGK9_DANRE	F1R1G8_DANRE	A0A2R8QM62_DANRE	E9QFR8_DANRE	F1QCK4_DANRE	F1Q6R4_DANRE	F8W5K5_DANRE	A0A0R4IKT8_DANRE	A0A2R8RTS6_DANRE	U3JAM7_DANRE	F1QEX9_DANRE	F1Q8K3_DANRE	F1QU51_DANRE	A0A2R8QKU1_DANRE	Q5RGQ4_DANRE	F1RCC9_DANRE	F1R899_DANRE	A0A2R8Q829_DANRE	A0A2R8QJ58_DANRE	A0A0R4IS21_DANRE	F1QN07_DANRE	A0A0R4IA72_DANRE	B0UY60_DANRE	F1QT83_DANRE	B0UY61_DANRE	A0A2R8QBL5_DANRE	F1R833_DANRE	A0A2R8QS07_DANRE	B8JI51_DANRE
biological_process	GO:0003007	heart morphogenesis	36	103	0.349515	0.947761	0.0655977	1	1	MYLK3_DANRE	NIPLA_DANRE	TBX5A_DANRE	TBXTA_DANRE	ALPK2_DANRE	Q9W6U0_DANRE	F1Q6T9_DANRE	Q30JB6_DANRE	F1Q9Z5_DANRE	Q6NW63_DANRE	Q7SX66_DANRE	B3DFN8_DANRE	Q98873_DANRE	Q90Y37_DANRE	E3W6T6_DANRE	Q9IAJ4_DANRE	A0A2R8Q844_DANRE	A0A286YBL8_DANRE	Q1LWJ4_DANRE	B8JL25_DANRE	A0A2R8QB37_DANRE	Q5TYX1_DANRE	F6NVB1_DANRE	G1K2W9_DANRE	F8W4A9_DANRE	X1WGE3_DANRE	A0A0R4IHT4_DANRE	A0A2R8Q5A3_DANRE	A0A0R4IGP2_DANRE	B3DKC1_DANRE	A0A0G2KQ62_DANRE	A0A286Y9P5_DANRE	A0A0R4IB15_DANRE	B8JLS3_DANRE	A0A2R8QR15_DANRE	A0A2R8QM53_DANRE
biological_process	GO:0001944	vasculature development	36	121	0.297521	0.890516	0.124909	1	1	FXC1B_DANRE	NRP1A_DANRE	SCRIB_DANRE	STN1_DANRE	YAP1_DANRE	VGFR3_DANRE	N2F1A_DANRE	MYCA_DANRE	AGRA2_DANRE	B0R024_DANRE	Q6EF99_DANRE	Q6EFA1_DANRE	Q1LWR7_DANRE	Q9I9B7_DANRE	Q5I2A9_DANRE	Q30JB6_DANRE	Q8JFB0_DANRE	Q6EFA0_DANRE	E9QF61_DANRE	X1WBR0_DANRE	F1RCH4_DANRE	F6P5J8_DANRE	F1QTZ4_DANRE	B0V0H4_DANRE	B8A566_DANRE	E9QEW1_DANRE	A0A2R8Q5A3_DANRE	E9QFY0_DANRE	A0A0R4IU05_DANRE	F1RAS9_DANRE	F1QH44_DANRE	E9QD83_DANRE	E7F8W3_DANRE	B8A567_DANRE	F1R254_DANRE	E7EZE5_DANRE
biological_process	GO:0008360	regulation of cell shape	36	165	0.218182	0.287521	0.77255	1	1	PLXA3_DANRE	AMOL2_DANRE	I3ISA3_DANRE	O93599_DANRE	Q6NV46_DANRE	A0A1S6L757_DANRE	F1QBC0_DANRE	A0A0R4IGF2_DANRE	F1QZQ3_DANRE	A0A0R4IEP9_DANRE	A0A2R8RQ90_DANRE	X1WGY4_DANRE	B0UY93_DANRE	E9QJ97_DANRE	A0A2R8PX85_DANRE	E7FGY1_DANRE	A0A2R8Q450_DANRE	A0A2R8Q3J7_DANRE	A2CEW3_DANRE	E7F145_DANRE	Q5RH91_DANRE	B8A5S6_DANRE	I3ITQ8_DANRE	F1Q7U0_DANRE	F1R3G4_DANRE	A0A2R8RSE1_DANRE	F1Q6L2_DANRE	E7F2W3_DANRE	F1R7J5_DANRE	A0A0R4IDI3_DANRE	B0V1S6_DANRE	E9QBL4_DANRE	A0A0R4IRZ9_DANRE	F1QEQ5_DANRE	A0A2R8QRD9_DANRE	A0A140LGG1_DANRE
cellular_component	GO:0005694	chromosome	36	108	0.333333	1	6.75e-13	1	0	STB1A_DANRE	FUMH_DANRE	SE1BA_DANRE	STB1B_DANRE	PRDM9_DANRE	HORM1_DANRE	INT7_DANRE	KMT5B_DANRE	DTL_DANRE	Q499A8_DANRE	B8JKC1_DANRE	A2CEF0_DANRE	A0A0R4IHR6_DANRE	E7F8R0_DANRE	A0A2R8QQ92_DANRE	Q5RHR0_DANRE	A0A2R8Q1Y5_DANRE	E7F336_DANRE	A0A0R4IPA3_DANRE	A0A2R8RYI2_DANRE	A0A286Y9L2_DANRE	A0A0R4IT14_DANRE	E7FGC2_DANRE	F1Q6L6_DANRE	E7FA74_DANRE	F1QJI9_DANRE	E7F5M6_DANRE	E7F643_DANRE	X1WCF3_DANRE	A0A0R4IPF5_DANRE	A0A2R8QRK7_DANRE	A0A0R4IUW4_DANRE	A0A2R8Q309_DANRE	A0A2R8QDW6_DANRE	A0A140LGY8_DANRE	A0A2R8Q6N6_DANRE
biological_process	GO:0051216	cartilage development	36	159	0.226415	0.30603	0.744349	1	1	SC23A_DANRE	SMAL1_DANRE	DLX5A_DANRE	DLX2A_DANRE	DDRGK_DANRE	FXC1B_DANRE	NRP1A_DANRE	YAP1_DANRE	DLX3B_DANRE	DLX1A_DANRE	Q6AZ98_DANRE	Q9YI02_DANRE	A2CG09_DANRE	Q6NYI3_DANRE	Q9DFH2_DANRE	Q6NYT8_DANRE	E9QCK7_DANRE	B6V3E1_DANRE	B0UXY9_DANRE	B7ZDE9_DANRE	B0UYK4_DANRE	A0A2R8RSI4_DANRE	A0A286Y8U3_DANRE	Q6P975_DANRE	F1QQN6_DANRE	F1R7W8_DANRE	F8W542_DANRE	A5WW41_DANRE	F1R5M2_DANRE	F1QUT5_DANRE	F1QUT4_DANRE	F1QXL0_DANRE	A0A0R4ICD7_DANRE	E7F226_DANRE	A0A2R8QRQ5_DANRE	F1QGL1_DANRE
biological_process	GO:0022008	neurogenesis	36	83	0.433735	1	3.01609e-20	1	0	TPP1_DANRE	MIB1_DANRE	BTB6A_DANRE	NAV3_DANRE	BTB6B_DANRE	E7F0B3_DANRE	Q6NYT8_DANRE	A4FTT4_DANRE	A0A2R8Q630_DANRE	F1QL52_DANRE	E7F502_DANRE	F6NSP9_DANRE	E7FGK6_DANRE	F1QF46_DANRE	E7FDG8_DANRE	B8JKQ2_DANRE	A0A0R4IG30_DANRE	A0A2R8QGC1_DANRE	A0A2R8QST1_DANRE	A0A1D5NSH7_DANRE	A0A2R8RYY2_DANRE	A4FTT3_DANRE	A0A2R8QE21_DANRE	A0A2R8Q244_DANRE	A0A2R8RKM3_DANRE	A0A1D5NSI4_DANRE	F8W578_DANRE	A0A0G2KCN9_DANRE	A0A2R8RQF8_DANRE	A0A2R8QLY4_DANRE	F1QK82_DANRE	A0A2R8QGT4_DANRE	A0A0R4IDG7_DANRE	A0A2R8Q3P3_DANRE	B8JKQ3_DANRE	F1QXL0_DANRE
cellular_component	GO:0030175	filopodium	36	87	0.413793	0.999976	5.88674e-05	1	0.022	SHP2A_DANRE	RIPR2_DANRE	NAV3_DANRE	IF2B1_DANRE	A0A0B4J1A6_DANRE	Q5RHU2_DANRE	F1R1Q1_DANRE	Q1JPU9_DANRE	B0V218_DANRE	A0A0R4IWX6_DANRE	B0V219_DANRE	A0A286YAJ7_DANRE	A0A2R8PVT4_DANRE	A0A140LFZ9_DANRE	J9JI18_DANRE	F1R4R9_DANRE	I3ITI8_DANRE	A0A0R4ILA7_DANRE	A0A2R8QEN6_DANRE	F1RAW5_DANRE	E7FGA0_DANRE	I3IRV8_DANRE	A0A2R8Q1F3_DANRE	A8E7L4_DANRE	E9QCU8_DANRE	A0A140LFT4_DANRE	F1Q6Q6_DANRE	A0A140LH65_DANRE	A0A2R8S0B6_DANRE	A0A0R4IB32_DANRE	I3IS53_DANRE	F1R187_DANRE	A0A2R8Q5K8_DANRE	F1QB08_DANRE	A0A286YAA1_DANRE	E9QFU5_DANRE
molecular_function	GO:0038023	signaling receptor activity	36	246	0.146341	1.25576e-24	1	0	1	NOTC1_DANRE	Q08CV1_DANRE	I3NI77_DANRE	Q2TTK0_DANRE	O93616_DANRE	E7F8Q6_DANRE	Q1ECV9_DANRE	E7EYT4_DANRE	F1QYF2_DANRE	R4GDN8_DANRE	F1QCA7_DANRE	A0A0R4IW15_DANRE	F1QJH2_DANRE	F1RCH4_DANRE	A0A2R8QH43_DANRE	A0A0R4IT02_DANRE	B0V2X4_DANRE	B0S6A6_DANRE	X1WEX9_DANRE	E7F101_DANRE	F1R366_DANRE	F1QDE5_DANRE	E9QFX4_DANRE	A0A0R4IW83_DANRE	A0A0R4IGC9_DANRE	A0A0R4IT11_DANRE	E7F3Z4_DANRE	F1QZF2_DANRE	B8A691_DANRE	E7F0C7_DANRE	A0A2R8QLP2_DANRE	A0A0R4INM0_DANRE	A0A2R8QLW9_DANRE	E7FBB7_DANRE	A5WUN6_DANRE	E7F2N4_DANRE
biological_process	GO:0006955	immune response	36	323	0.111455	3.81002e-22	1	0	1	NFIL3_DANRE	Q0PKX8_DANRE	A2BF64_DANRE	F1Q546_DANRE	A9JRH6_DANRE	Q1L8A5_DANRE	Q68IN2_DANRE	F1Q767_DANRE	B8ZHI7_DANRE	F1QUA2_DANRE	B0S697_DANRE	F1QSH0_DANRE	E9QDV7_DANRE	B8A4W6_DANRE	F1R2L7_DANRE	F1QY70_DANRE	F8W5R7_DANRE	A0A2R8QLX1_DANRE	A0A2R8RVG8_DANRE	B8A4W5_DANRE	F1R9Q2_DANRE	F1RAX0_DANRE	F1QT03_DANRE	F1R7W5_DANRE	F1QDU1_DANRE	F1REK4_DANRE	F1R8Y3_DANRE	F1QVL4_DANRE	B8A4W7_DANRE	Q5RIZ6_DANRE	A0A0R4ILD4_DANRE	F6PCD2_DANRE	F1QSF7_DANRE	F6NUW0_DANRE	A0A0R4IFS1_DANRE	F1RAV7_DANRE
cellular_component	GO:0009986	cell surface	36	239	0.150628	1.07504e-06	0.999999	0	1	LFN1L_DANRE	Q6EF99_DANRE	Q6EFA1_DANRE	F1Q8X9_DANRE	Q1MT36_DANRE	A0A2R8PXY2_DANRE	E7FB24_DANRE	Q6EFA0_DANRE	Q5U3E5_DANRE	E7EXK7_DANRE	F1QMQ8_DANRE	E7EYI4_DANRE	A0A2R8QSH5_DANRE	A0A0R4IL96_DANRE	A0A0R4IR20_DANRE	E7F9P0_DANRE	F6P5J8_DANRE	E7FAU4_DANRE	F1R567_DANRE	A0A0R4IDJ5_DANRE	F1R469_DANRE	F1QWI9_DANRE	E7FGW0_DANRE	A4JYJ7_DANRE	A0A0R4IDN9_DANRE	F1QUY7_DANRE	A0A0R4INV6_DANRE	A0A0G2KZR4_DANRE	R4GEC6_DANRE	A0A2R8QB29_DANRE	A0A2R8PYF0_DANRE	F1QSF7_DANRE	A0A0H2UKP8_DANRE	E7FGE4_DANRE	F1Q734_DANRE	E7EYF6_DANRE
molecular_function	GO:0000146	microfilament motor activity	36	71	0.507042	1	1.51156e-07	1	0	E9QDU2_DANRE	Q9DGG8_DANRE	F1QKS0_DANRE	A0A0R4IIX0_DANRE	A0A2R8Q8N4_DANRE	F8W622_DANRE	E7F106_DANRE	Q1LXI2_DANRE	F1R4R9_DANRE	A0A2R8QUR4_DANRE	F1R527_DANRE	B0S6F2_DANRE	A0A286YAD0_DANRE	A0A2R8QSJ9_DANRE	A0A0R4IPW9_DANRE	E7FDV0_DANRE	A0A2R8RZK3_DANRE	A0A0R4IXQ5_DANRE	E7FGA0_DANRE	F8W4K6_DANRE	E9QCU8_DANRE	F1Q6Q6_DANRE	E9QEL6_DANRE	F1R7P5_DANRE	E7FFP7_DANRE	F1QYX4_DANRE	E7FB39_DANRE	F1QIJ5_DANRE	A0A286Y9F5_DANRE	A0A1D5NS66_DANRE	A0A0R4IW90_DANRE	A0A0R4IB90_DANRE	A0A2R8QQJ0_DANRE	E7FCI5_DANRE	A0A286YAA1_DANRE	E9QFU5_DANRE
biological_process	GO:0000398	mRNA splicing, via spliceosome	35	200	0.175	0.00215977	0.998529	0.871	1	MTA70_DANRE	GPKOW_DANRE	SART3_DANRE	DBR1_DANRE	F1QND0_DANRE	Q6DRP3_DANRE	Q802Y1_DANRE	Q6DRF8_DANRE	Q7ZVN6_DANRE	F1QF98_DANRE	Q1LY92_DANRE	A0A286YBY7_DANRE	A0A2R8RLN8_DANRE	F1Q7N6_DANRE	F1R9N7_DANRE	A0A0G2KUM0_DANRE	E9QH15_DANRE	F1QN27_DANRE	F1QQV6_DANRE	F1R9E9_DANRE	A0A0R4IL44_DANRE	F1Q6N0_DANRE	A0A2R8QGL1_DANRE	A0A2R8PZV7_DANRE	Q5SPH1_DANRE	E7FCK8_DANRE	A0A2R8Q796_DANRE	Q1LVD1_DANRE	E9QDJ4_DANRE	E7FGW2_DANRE	E7F1H6_DANRE	E7F2A1_DANRE	E9QFC1_DANRE	F1R4L1_DANRE	A0A2R8QJ94_DANRE
biological_process	GO:0006974	cellular response to DNA damage stimulus	35	99	0.353535	1	6.0342e-08	1	0	HPF1_DANRE	MMS19_DANRE	FUMH_DANRE	MTA70_DANRE	BRAT1_DANRE	PSM4A_DANRE	RNF8_DANRE	TRIPC_DANRE	UFL1_DANRE	UBP16_DANRE	WAC_DANRE	PSM4B_DANRE	INT7_DANRE	DTL_DANRE	Q90ZY5_DANRE	F1R135_DANRE	E7EYF3_DANRE	A0A140LGM4_DANRE	A0A2R8PVA3_DANRE	X1WD98_DANRE	B0V1J5_DANRE	F1QJB6_DANRE	A0A2R8PYQ8_DANRE	A0A2R8Q559_DANRE	F1R294_DANRE	A0A0R4IDC2_DANRE	A0A2R8QPQ7_DANRE	R4GE34_DANRE	R4GDY2_DANRE	F8W4Z3_DANRE	A0A2R8RVN3_DANRE	A0A0R4IWH7_DANRE	F1Q8J2_DANRE	E9QFQ1_DANRE	A0A2R8RRB3_DANRE
cellular_component	GO:0016324	apical plasma membrane	35	174	0.201149	0.29902	0.762437	1	1	FLTOP_DANRE	S39AE_DANRE	RIPR2_DANRE	PAL1A_DANRE	XPO2_DANRE	ZMY10_DANRE	DLG1_DANRE	A1A1B_DANRE	F1Q8X9_DANRE	Q5RHU2_DANRE	F1Q8Q2_DANRE	Q6TNS1_DANRE	B5DDZ4_DANRE	F1R3J0_DANRE	F1QTX0_DANRE	F1QVF2_DANRE	A0A2R8Q812_DANRE	J9JI18_DANRE	A0A0R4IVD8_DANRE	R4GEK0_DANRE	A0A2R8QTH3_DANRE	A0A2R8QCI9_DANRE	A0A2R8QSL0_DANRE	A0A2R8RLY1_DANRE	F1QS67_DANRE	A5WW50_DANRE	F1QWI9_DANRE	A0A2R8Q7H2_DANRE	A0A2R8S0B6_DANRE	A0A0R4IS11_DANRE	A0A0R4IAG0_DANRE	F1Q6C1_DANRE	F1QJB0_DANRE	A0A0R4I9I8_DANRE	E7EYF6_DANRE
biological_process	GO:0003341	cilium movement	35	77	0.454545	0.999982	3.62225e-05	1	0.071	CCD39_DANRE	CCD40_DANRE	CF206_DANRE	TTLL6_DANRE	DNAI3_DANRE	DAAF3_DANRE	F1R672_DANRE	F1QCK8_DANRE	A3KNM0_DANRE	A0A0R4IY79_DANRE	E9QBH9_DANRE	A0A2R8RQB1_DANRE	A0A2R8RI11_DANRE	A0A0R4IHI4_DANRE	F1QB07_DANRE	A0A0R4IGE5_DANRE	A0A0R4IUW7_DANRE	F1RAR6_DANRE	A0A2R8Q6Y8_DANRE	F1QW87_DANRE	I3ITD2_DANRE	A0A2R8Q441_DANRE	A0A286YAR8_DANRE	A0A2R8QR54_DANRE	A0A2R8QP75_DANRE	E7FGS8_DANRE	F1RAF1_DANRE	A0A0G2L8X4_DANRE	A0A2R8QBQ8_DANRE	F1QFD6_DANRE	F1QBY7_DANRE	A0A2R8RL41_DANRE	F1QLA3_DANRE	E9QB24_DANRE	F1R185_DANRE
cellular_component	GO:0005815	microtubule organizing center	35	128	0.273438	1	7.02814e-14	1	0	LRWD1_DANRE	MIB1_DANRE	FIGN_DANRE	CLAP2_DANRE	DDX11_DANRE	Z4YHS7_DANRE	Q1LV44_DANRE	K7DY17_DANRE	A0A0R4IQR0_DANRE	A0A2R8QJQ2_DANRE	E7EYZ7_DANRE	A0A2R8QLH8_DANRE	E7FG55_DANRE	A8WHM7_DANRE	E7FD42_DANRE	F1QAA8_DANRE	A0A0R4IKV7_DANRE	A0A2R8QEC4_DANRE	E9QFU9_DANRE	A0A2R8PWK7_DANRE	A0A1D5NSS9_DANRE	B8A4V4_DANRE	A0A2R8QNY7_DANRE	A0A2R8QED9_DANRE	A0A2R8RT75_DANRE	F1Q793_DANRE	E7FDY6_DANRE	A0A2R8RUX3_DANRE	A0A0R4IVQ0_DANRE	F1R253_DANRE	A0A2R8QKB5_DANRE	E7FFB1_DANRE	I3ISP1_DANRE	A0A2R8QDD7_DANRE	X1WCN4_DANRE
biological_process	GO:0007283	spermatogenesis	34	112	0.303571	0.995762	0.00713848	1	1	PIWL2_DANRE	SAS6_DANRE	DAAF1_DANRE	MTA70_DANRE	BAG6_DANRE	BRDT_DANRE	TRD7A_DANRE	TRD7B_DANRE	TDRD5_DANRE	TDRD1_DANRE	TDRD9_DANRE	HORM1_DANRE	A4GT83_DANRE	B8A4S2_DANRE	F1QB35_DANRE	A8E5B6_DANRE	E9QD44_DANRE	A0A2R8Q0G4_DANRE	A0A2R8PYS4_DANRE	A0A0R4IAW9_DANRE	A0A2R8Q4T1_DANRE	A0A0R4IR26_DANRE	A0A2R8QDJ4_DANRE	F1QE52_DANRE	A0A0R4IRQ5_DANRE	F1QIJ1_DANRE	Q29R83_DANRE	A2CEB4_DANRE	A0A0R4IQ79_DANRE	R4GEV4_DANRE	A0A2R8QRK5_DANRE	F1R8E8_DANRE	A8WHP7_DANRE	A0A2R8QPQ1_DANRE
biological_process	GO:0006351	transcription, DNA-templated	34	144	0.236111	1	1.18808e-131	1	0	LIN9_DANRE	RPC3_DANRE	TBX5A_DANRE	B8A483_DANRE	A8E5K6_DANRE	Q1L9A3_DANRE	Q08BJ0_DANRE	Q5SPB7_DANRE	Q803Q8_DANRE	F1QNL1_DANRE	A0A2R8RSE5_DANRE	A0A2R8Q304_DANRE	A0A2R8Q678_DANRE	M9MM95_DANRE	F1QQA3_DANRE	A0A0R4IU64_DANRE	A0A2R8QJN8_DANRE	F1QTJ1_DANRE	I3IT03_DANRE	F1QNQ7_DANRE	A0A2R8PVW8_DANRE	A0A2R8RQ51_DANRE	A0A0R4ITE5_DANRE	A0A2R8QAB1_DANRE	A0A2R8RP10_DANRE	A2BGA7_DANRE	A0A2R8QP40_DANRE	A0A2R8RJM1_DANRE	A0A2R8QC40_DANRE	A2CEX6_DANRE	E7FB55_DANRE	A0A2R8PY80_DANRE	A0A2R8RQ64_DANRE	A0A2R8Q899_DANRE
cellular_component	GO:0012505	endomembrane system	34	197	0.172589	0.74068	0.272748	1	1	RN145_DANRE	JAK1_DANRE	Q6PHV0_DANRE	F1Q6A2_DANRE	A0A2R8Q071_DANRE	Q7ZV18_DANRE	Q567Y3_DANRE	A0A2R8RWS3_DANRE	A0A0R4IXG8_DANRE	A0A286Y9I3_DANRE	F1QIQ6_DANRE	A0A2R8QKG1_DANRE	E7F2P0_DANRE	F1QG86_DANRE	A0A2R8Q4F0_DANRE	A0A2R8RKH5_DANRE	E9QJ57_DANRE	X1WEE0_DANRE	F1QUF6_DANRE	A0A0R4IK07_DANRE	E7F0D3_DANRE	F1QDN6_DANRE	X1WHN6_DANRE	A0A2R8QNB2_DANRE	B0V237_DANRE	A0A0R4ICU5_DANRE	E9QC02_DANRE	A2BG86_DANRE	A0A2R8QIS1_DANRE	Q1MTI1_DANRE	E9QEQ0_DANRE	A0A2R8QFW8_DANRE	A0A2R8RWH2_DANRE	F1QFP8_DANRE
cellular_component	GO:0005905	clathrin-coated pit	34	76	0.447368	1	1.9834e-07	1	0	FCHO1_DANRE	SAC2_DANRE	F1RD00_DANRE	Q6AXI5_DANRE	A0A0R4IKR8_DANRE	A0A0R4IA99_DANRE	A0A0R4IZQ7_DANRE	F1QKW9_DANRE	U3JA74_DANRE	A0A2R8QNV1_DANRE	F1R4R9_DANRE	A0A2R8QIJ0_DANRE	G1K2F5_DANRE	A0A0R4ITB0_DANRE	E7FGA0_DANRE	E9QCU8_DANRE	A0A0R4IWJ1_DANRE	K7DXX1_DANRE	F1Q6Q6_DANRE	F8W5M9_DANRE	F1QCM5_DANRE	A0A0R4IS02_DANRE	A0A286YBQ2_DANRE	A0A0R4IL09_DANRE	A0A286YAZ9_DANRE	A8E7E7_DANRE	I3IT87_DANRE	A0A2R8Q6T3_DANRE	A0A2R8QHW2_DANRE	A0A2R8QK11_DANRE	F8W4F2_DANRE	F1Q9V1_DANRE	A0A286YAA1_DANRE	E9QFU5_DANRE
molecular_function	GO:0031490	chromatin DNA binding	34	51	0.666667	0.999611	0.000838279	1	0.505	A0A2R8QIN4_DANRE	A0A0G2KQ27_DANRE	A0A2R8PYX0_DANRE	F1R259_DANRE	A0A1D5NSI1_DANRE	E9QG91_DANRE	A0A0G2KGP5_DANRE	E7FAU5_DANRE	A0A0R4IUG1_DANRE	F1R3W3_DANRE	A0A0R4IPF2_DANRE	F1Q597_DANRE	A0A2R8QTA2_DANRE	A0A2R8Q2M3_DANRE	A0A0R4IYD2_DANRE	A0A2R8Q4T2_DANRE	A0A0R4IDZ5_DANRE	A0A2R8Q9T1_DANRE	E7F5T6_DANRE	E7F0N2_DANRE	A0A2R8QER3_DANRE	E7F3X7_DANRE	B0V357_DANRE	A0A2R8PVG8_DANRE	A0A0R4INM9_DANRE	A0A0R4IPF3_DANRE	A0A2R8QTK3_DANRE	F6PBE4_DANRE	B0V356_DANRE	A0A2R8Q521_DANRE	A0A0R4IVZ7_DANRE	X1WG57_DANRE	A0A0R4ISI0_DANRE	A0A0R4IY90_DANRE
molecular_function	GO:0051959	dynein light intermediate chain binding	34	57	0.596491	1	1.3537e-09	1	0	DAPLE_DANRE	HOOK1_DANRE	F1R672_DANRE	F1Q6J7_DANRE	A0A0R4IY79_DANRE	E9QBH9_DANRE	F1QPU7_DANRE	A0A2R8RQB1_DANRE	F1QIY3_DANRE	A0A0R4IHI4_DANRE	F1QB07_DANRE	A0A2R8QB87_DANRE	E9QH47_DANRE	K7DY80_DANRE	A0A2R8Q6Y8_DANRE	A0A1D5NT12_DANRE	A0A2R8QMF4_DANRE	I3ITD2_DANRE	A0A2R8QCS6_DANRE	A2BG35_DANRE	A0A2R8QR54_DANRE	E7FGH9_DANRE	A0A2R8QP75_DANRE	E7FGT8_DANRE	E7FGS8_DANRE	F1RAF1_DANRE	A0A0G2L009_DANRE	A0A2R8QBQ8_DANRE	A0A2R8RL41_DANRE	F1QLA3_DANRE	A0A2R8Q3X2_DANRE	A0A2R8QG79_DANRE	F1R185_DANRE	F1Q8U0_DANRE
molecular_function	GO:0045505	dynein intermediate chain binding	34	70	0.485714	1	1.20566e-06	1	0.001	F1R672_DANRE	A0A2R8Q9F8_DANRE	F1Q6J7_DANRE	A0A0R4IY79_DANRE	E9QBH9_DANRE	A0A2R8RQB1_DANRE	F1RBX3_DANRE	A0A0R4IHI4_DANRE	F1QB07_DANRE	A0A2R8QB87_DANRE	E9QH47_DANRE	A0A2R8QLR4_DANRE	K7DY80_DANRE	A0A2R8Q6Y8_DANRE	A0A1D5NT12_DANRE	A0A2R8RHV3_DANRE	A0A2R8QMF4_DANRE	I3ITD2_DANRE	A0A2R8QCS6_DANRE	A2BG35_DANRE	A0A2R8QR54_DANRE	A0A2R8QP75_DANRE	A0A2R8QFA0_DANRE	B8JIT9_DANRE	E7FGT8_DANRE	E7FGS8_DANRE	F1RAF1_DANRE	A0A0G2L009_DANRE	A0A2R8QBQ8_DANRE	A0A2R8RL41_DANRE	F1QLA3_DANRE	A0A2R8Q3X2_DANRE	A0A2R8QG79_DANRE	F1R185_DANRE
molecular_function	GO:0019901	protein kinase binding	33	164	0.20122	0.274309	0.772273	1	1	FA83D_DANRE	FA83H_DANRE	DLG1_DANRE	NBEL2_DANRE	E7F4Q7_DANRE	Q1LUQ2_DANRE	A0A0R4IEK8_DANRE	Q5BJ09_DANRE	F1QM84_DANRE	A0A286Y8V9_DANRE	E7FG24_DANRE	A0A2R8Q0B5_DANRE	A0A0R4IEX1_DANRE	A0A140LGD0_DANRE	A0A2R8Q450_DANRE	B7ZCY9_DANRE	F1R9L2_DANRE	A0A1L1QZA8_DANRE	E7EXI7_DANRE	F1R6G2_DANRE	E7F4B5_DANRE	A0A0R4IDF6_DANRE	A0A0R4IYV1_DANRE	A0A2R8RJB6_DANRE	Q1LX18_DANRE	F1R8B4_DANRE	A0A2R8Q446_DANRE	F1R4P6_DANRE	E9QFZ1_DANRE	A0A2R8QRE1_DANRE	E7FFM2_DANRE	A0A0G2L4Z6_DANRE	E7EZD1_DANRE
biological_process	GO:0008045	motor neuron axon guidance	33	94	0.351064	0.998991	0.00203638	1	0.959	PLXA3_DANRE	SE3AB_DANRE	SE3AA_DANRE	NRP1A_DANRE	VGFR3_DANRE	CHSTB_DANRE	E2F8_DANRE	B0S6T1_DANRE	O93599_DANRE	Q6NV46_DANRE	A0A1S6L757_DANRE	F1QK52_DANRE	A0A0R4IGF2_DANRE	A0A2R8Q9F8_DANRE	A0A0G2KNY9_DANRE	F1RBX3_DANRE	F1QPJ1_DANRE	A0A0R4ICW0_DANRE	A0A0R4IF59_DANRE	A0A2R8RHV3_DANRE	A0A1D5NSB6_DANRE	A0A2R8QC01_DANRE	A0A2R8QFA0_DANRE	B8JIT9_DANRE	A0A2R8RKU6_DANRE	A0A2R8Q880_DANRE	A0A0R4ISY7_DANRE	A0A0R4INK8_DANRE	A0A0R4II20_DANRE	A0A2R8QCK8_DANRE	A0A0R4IL48_DANRE	F1R9B8_DANRE	A0A2R8QMX9_DANRE
cellular_component	GO:0000922	spindle pole	33	84	0.392857	0.999817	0.000398297	1	0.148	PLK4_DANRE	CC14A_DANRE	CEP89_DANRE	CEP63_DANRE	WDR73_DANRE	DDX11_DANRE	B3DIU9_DANRE	Q7ZVN3_DANRE	F1R0W9_DANRE	B0S8I4_DANRE	Z4YHS7_DANRE	Q08CT1_DANRE	F6PC33_DANRE	A0A2R8QF71_DANRE	A0A0R4ILV5_DANRE	F6PFE9_DANRE	A0A0R4IN88_DANRE	E9QDJ2_DANRE	F1QAL1_DANRE	A0A286Y8J7_DANRE	A0A2R8RP20_DANRE	A0A286YA27_DANRE	A0A2R8QB11_DANRE	F1Q7X5_DANRE	A0A0R4IW36_DANRE	A0A2R8RIU6_DANRE	A0A2R8Q3U3_DANRE	F8W600_DANRE	A0A2R8QDD7_DANRE	F8W5R0_DANRE	A0A2R8RU11_DANRE	F8W2B2_DANRE	F1QGL3_DANRE
biological_process	GO:0000278	mitotic cell cycle	33	136	0.242647	0.0285394	0.975922	1	1	PLK4_DANRE	SMAL1_DANRE	UBP16_DANRE	B3DIU9_DANRE	E7F7H0_DANRE	Q803E3_DANRE	Q6IQ78_DANRE	Q4QRG0_DANRE	A5PMM5_DANRE	A0A0B4J1A5_DANRE	E7FFJ6_DANRE	B0V351_DANRE	F1QM38_DANRE	E9QEH8_DANRE	F6PFE9_DANRE	A0A0R4IN88_DANRE	E9QEE0_DANRE	F1R7B6_DANRE	A0A286Y8J7_DANRE	F1QGY5_DANRE	A0A2R8Q8E3_DANRE	A0A0R4IRM2_DANRE	A0A2R8Q781_DANRE	E9QIT3_DANRE	F1Q7G1_DANRE	E7F296_DANRE	E7F2U4_DANRE	A0A2R8PX42_DANRE	F1Q7X5_DANRE	A5PMS7_DANRE	A0A0R4J7S6_DANRE	A0A2R8RU11_DANRE	F1QP24_DANRE
biological_process	GO:0000902	cell morphogenesis	33	88	0.375	1	2.00924e-07	1	0	TBCC1_DANRE	F2Z4T4_DANRE	A2RUX1_DANRE	Q803W9_DANRE	Z4YHS7_DANRE	Q6YBS2_DANRE	F1Q6L5_DANRE	B8JMD7_DANRE	E7F374_DANRE	X1WE04_DANRE	F1QZQ0_DANRE	A0A2R8QNL6_DANRE	A0A2R8QQS8_DANRE	F1R7N8_DANRE	A0A2R8PYU5_DANRE	A0A2R8QNP2_DANRE	A0A2R8QBS2_DANRE	A0A2R8QHG8_DANRE	B8JMD0_DANRE	F1QJC8_DANRE	A0A0R4IC31_DANRE	E7FE96_DANRE	B0S758_DANRE	A0A2R8Q9F2_DANRE	A0A2R8QA33_DANRE	A0A0R4IS11_DANRE	A0A2R8QPP0_DANRE	E7F8H1_DANRE	A0A2R8Q3I4_DANRE	A0A2R8QDD7_DANRE	E9QHC8_DANRE	A0A2R8QFQ8_DANRE	A0A2R8Q847_DANRE
biological_process	GO:0030335	positive regulation of cell migration	33	124	0.266129	0.0879602	0.936247	1	1	SE3AB_DANRE	SEM4E_DANRE	SE3AA_DANRE	ELP5_DANRE	FA83H_DANRE	ZN703_DANRE	E7F898_DANRE	A0A2R8Q0D8_DANRE	D0FH56_DANRE	E7FBB3_DANRE	A0A2R8RHW9_DANRE	A0A2R8Q0R5_DANRE	A0A286Y9T7_DANRE	A0A2R8QAH3_DANRE	F1QU86_DANRE	E7FEP0_DANRE	F1QGW9_DANRE	A0A0R4IDW5_DANRE	F1R9L2_DANRE	Q1LYS1_DANRE	A0A2R8QRD6_DANRE	B8JMB1_DANRE	X1WF24_DANRE	A0A2R8RPQ4_DANRE	A0A0G2KQ30_DANRE	F1RB05_DANRE	F1R7Z2_DANRE	F1R501_DANRE	A0A286YAK7_DANRE	A0A2R8PYF1_DANRE	A0A0R4IR66_DANRE	B8A5K6_DANRE	F1QS30_DANRE
biological_process	GO:0048565	digestive tract development	33	72	0.458333	0.999982	3.79499e-05	1	0.073	RUVB2_DANRE	NIPLA_DANRE	TBXTA_DANRE	CELF1_DANRE	F1QQA2_DANRE	B3DJD1_DANRE	Q6NYN9_DANRE	Q6NW63_DANRE	B3DFS9_DANRE	A0A2R8QM70_DANRE	E9QIQ3_DANRE	F1R7N7_DANRE	A0A286Y877_DANRE	F1Q5T5_DANRE	A0A2R8QID6_DANRE	A0A286YBQ8_DANRE	A0A0R4IG74_DANRE	B8JL25_DANRE	E9QGK5_DANRE	A0A2R8QI31_DANRE	A0A0R4ILM9_DANRE	A0A0R4IQK3_DANRE	X1WE68_DANRE	F1QAD6_DANRE	E9QEC4_DANRE	F8W4Z3_DANRE	A0A2R8QTE7_DANRE	E7FAZ8_DANRE	A0A0R4IB15_DANRE	A0A2R8Q9H4_DANRE	A0A0R4IWH7_DANRE	F1Q4L8_DANRE	A0A2R8PZ52_DANRE
biological_process	GO:0060026	convergent extension	33	101	0.326733	0.964683	0.0477425	1	1	NPHP3_DANRE	EPB4A_DANRE	OFD1_DANRE	WNT5B_DANRE	AMOL2_DANRE	B3DJI0_DANRE	Q5RHJ3_DANRE	A0A2R8Q8W1_DANRE	E9QIQ3_DANRE	F1R3T7_DANRE	E7FAI5_DANRE	E7EXH4_DANRE	A0A0R4IG74_DANRE	A0A288CG34_DANRE	F1Q597_DANRE	A0A2R8QJW7_DANRE	A2RRV7_DANRE	B8A6E8_DANRE	F1RCR4_DANRE	E7FC99_DANRE	E9QEC4_DANRE	E7F2F7_DANRE	Q1MTA8_DANRE	A0A2R8QNB7_DANRE	F6PBE4_DANRE	A0A2R8QTE7_DANRE	E7F630_DANRE	A0A2R8Q9H4_DANRE	F1QS48_DANRE	A0A2R8Q3U7_DANRE	F1QAG4_DANRE	E7EZD6_DANRE	F1Q4N0_DANRE
cellular_component	GO:0098978	glutamatergic synapse	33	77	0.428571	0.99999	2.93181e-05	1	0.012	DLGP1_DANRE	Q8AWE0_DANRE	Q7T1A1_DANRE	Q1MT71_DANRE	E7F6K9_DANRE	A0A2R8QAF3_DANRE	A0A2R8Q9B4_DANRE	E7FAC5_DANRE	A0A2R8QC86_DANRE	A0A0R4IRH4_DANRE	A0A0R4ITW6_DANRE	A0A0R4IGI4_DANRE	F1QC52_DANRE	A0A2R8QV60_DANRE	F1QTK1_DANRE	F8W2U4_DANRE	X1WBR1_DANRE	E7F7X5_DANRE	Q1L8T7_DANRE	F1QWU9_DANRE	A0A2R8RX97_DANRE	F1R3Y1_DANRE	X1WG76_DANRE	A0A2R8QAU5_DANRE	A0A2R8PWJ7_DANRE	F1QQR5_DANRE	A0A2R8QIB9_DANRE	E7F1L2_DANRE	B0UYE9_DANRE	A0A0R4IVK0_DANRE	A0A2R8Q3D0_DANRE	A0A2R8QJT7_DANRE	F6NYB5_DANRE
biological_process	GO:0031122	cytoplasmic microtubule organization	33	80	0.4125	0.9998	0.000467886	1	0.549	DAPLE_DANRE	CAM1B_DANRE	WDR73_DANRE	HOOK1_DANRE	B3DIU9_DANRE	F1R0W9_DANRE	F1QPU7_DANRE	E7F2X0_DANRE	A0A0R4IZI6_DANRE	F1QIN6_DANRE	F1QIY3_DANRE	F1QGA8_DANRE	F8W3F2_DANRE	F6PC33_DANRE	F1R7T2_DANRE	E7F693_DANRE	F6PFE9_DANRE	A0A2R8QG18_DANRE	E7F3U0_DANRE	A0A2R8Q8R7_DANRE	A0A286YAU5_DANRE	A0A2R8RJ37_DANRE	E7FGH9_DANRE	Q1LUF1_DANRE	A0A2R8RP20_DANRE	F8W339_DANRE	F1R1D6_DANRE	A0A286YA27_DANRE	F1Q557_DANRE	A0A0R4IW36_DANRE	A8DZ53_DANRE	F1Q8U0_DANRE	A0A0G2KQI8_DANRE
molecular_function	GO:0005102	signaling receptor binding	33	279	0.11828	1.71806e-13	1	0	1	CAPR2_DANRE	WNT5B_DANRE	Q1LWR7_DANRE	Q08BD7_DANRE	F1QMY9_DANRE	A0A2R8Q779_DANRE	F8W5D1_DANRE	E9QCL8_DANRE	Q1MT43_DANRE	E7FGK6_DANRE	A0A2R8Q7T0_DANRE	E7EZZ0_DANRE	A0A0R4IXV0_DANRE	F1QYU0_DANRE	A0A0R4IMG6_DANRE	A2CEW3_DANRE	A0A2R8QAJ4_DANRE	A0A2R8RYY2_DANRE	Q6NYE1_DANRE	A0A0R4II20_DANRE	F8W425_DANRE	F1QYL5_DANRE	F1QVR4_DANRE	A0A0R4IDI3_DANRE	K7DY96_DANRE	A0A0R4IDG7_DANRE	X1WC45_DANRE	A0A2R8Q3P3_DANRE	X1WCT5_DANRE	E7EXE8_DANRE	A0A2R8QMZ2_DANRE	F1R9B8_DANRE	F1QX98_DANRE
cellular_component	GO:0043197	dendritic spine	33	113	0.292035	0.931137	0.100475	1	1	CPEB4_DANRE	A0A2R8RMZ0_DANRE	F1QJ05_DANRE	A0A2R8QF27_DANRE	F1QCQ3_DANRE	A0A286Y962_DANRE	A0A2R8PWF3_DANRE	A0A1D5NSQ0_DANRE	A0A0R4IZI1_DANRE	E7FGL9_DANRE	E7FDI0_DANRE	A0A2R9YJM9_DANRE	E9QDB8_DANRE	F1Q9E4_DANRE	F1QFV1_DANRE	A0A2R8Q2L9_DANRE	B0V2X4_DANRE	F1QA84_DANRE	F8W4G8_DANRE	F1QBX1_DANRE	F1QXP6_DANRE	E7FED4_DANRE	F1R558_DANRE	A0A2R8Q802_DANRE	A0A1D5NS70_DANRE	X1WDK5_DANRE	A0A2R8Q612_DANRE	E7F179_DANRE	F1Q9E9_DANRE	A0A2R8QSQ5_DANRE	B0R0B4_DANRE	A0A0R4IUM3_DANRE	F1Q590_DANRE
biological_process	GO:0030050	vesicle transport along actin filament	33	67	0.492537	0.999998	6.37799e-06	1	0.019	Q9DGG8_DANRE	F1QKS0_DANRE	A0A2R8Q8N4_DANRE	F8W622_DANRE	E7F106_DANRE	Q1LXI2_DANRE	F1R4R9_DANRE	A0A2R8QUR4_DANRE	F1R527_DANRE	B0S6F2_DANRE	A0A286YAD0_DANRE	A0A2R8QSJ9_DANRE	A0A0R4IPW9_DANRE	E7FDV0_DANRE	A0A2R8RZK3_DANRE	A0A0R4IXQ5_DANRE	E7FGA0_DANRE	F8W4K6_DANRE	E9QCU8_DANRE	F1Q6Q6_DANRE	E9QEL6_DANRE	F1R7P5_DANRE	F1QYX4_DANRE	E7FB39_DANRE	F1QIJ5_DANRE	A0A286Y9F5_DANRE	A0A1D5NS66_DANRE	A0A0R4IW90_DANRE	A0A0R4IB90_DANRE	A0A2R8QQJ0_DANRE	E7FCI5_DANRE	A0A286YAA1_DANRE	E9QFU5_DANRE
biological_process	GO:0009617	response to bacterium	32	156	0.205128	0.00191875	0.998704	0.843	1	MXA_DANRE	TRAF6_DANRE	A3KFQ8_DANRE	A3KFQ2_DANRE	A3KFQ1_DANRE	Q5VTQ5_DANRE	Q1L8A5_DANRE	Q5VTQ6_DANRE	Q1L9E4_DANRE	F1R593_DANRE	F6NGE1_DANRE	F1QVF2_DANRE	B8A4W6_DANRE	F1RCC1_DANRE	A0A0G2KST8_DANRE	F1QGV7_DANRE	B8A4W5_DANRE	A0A2R8RLY1_DANRE	F1QJ19_DANRE	Q8AWD9_DANRE	F1REK4_DANRE	A0A0G2KQQ1_DANRE	A0A0R4IP49_DANRE	F1QRI0_DANRE	A0A2R8QJC5_DANRE	F1QG83_DANRE	F6PF44_DANRE	A0A0N4STN9_DANRE	B8A4W7_DANRE	A0A0N4SU19_DANRE	A0A0R4IQ44_DANRE	A0A0R4IZH4_DANRE
molecular_function	GO:0043130	ubiquitin binding	32	107	0.299065	0.977011	0.0374354	1	1	TAB2_DANRE	RNF8_DANRE	UBP16_DANRE	UBP13_DANRE	VPS36_DANRE	ILRUN_DANRE	N4BP1_DANRE	ADRM1_DANRE	A4IFZ0_DANRE	X1WHV6_DANRE	A0A2R8QEJ6_DANRE	F1QHZ1_DANRE	F1QGD0_DANRE	A0A2R8QPX7_DANRE	A0A2R8RRP5_DANRE	F1R1A5_DANRE	I3IRX0_DANRE	E9QH92_DANRE	F1Q974_DANRE	A0A2R8Q355_DANRE	E9QGR9_DANRE	F1QV13_DANRE	A0A2R8QKC2_DANRE	A0A2R8Q420_DANRE	F1REE7_DANRE	F1R2I7_DANRE	A0A2R8QD46_DANRE	F1Q8J2_DANRE	F1QPQ8_DANRE	E9QEG9_DANRE	F1QFF9_DANRE	E9QCS7_DANRE
biological_process	GO:0007189	adenylate cyclase-activating G protein-coupled receptor signaling pathway	32	208	0.153846	0.000341087	0.999811	0.289	1	LGR6_DANRE	GP161_DANRE	TM116_DANRE	AGRG6_DANRE	Q5U389_DANRE	F1R8K4_DANRE	Q6WZB3_DANRE	Q1LYP1_DANRE	D2CFN3_DANRE	E7FB43_DANRE	F1R4K2_DANRE	F1QB00_DANRE	Q1L8K1_DANRE	A0A2R8QEV2_DANRE	F1Q7W7_DANRE	A0A2R8PX08_DANRE	R4GDT3_DANRE	E7F4F2_DANRE	R4GEI0_DANRE	A0A1D5NS94_DANRE	A0A2R8PVQ8_DANRE	F1Q5J6_DANRE	F1R7D0_DANRE	F1R5S5_DANRE	A0A0R4IUC0_DANRE	A0A0R4IPH9_DANRE	A0A0R4IAT2_DANRE	A0A140LGW6_DANRE	E7FDV3_DANRE	A0A0R4IS63_DANRE	F1Q734_DANRE	E7F2K6_DANRE
biological_process	GO:0060218	hematopoietic stem cell differentiation	32	82	0.390244	0.937108	0.0911642	1	1	NPS4L_DANRE	MIB1_DANRE	NOTC1_DANRE	UFL1_DANRE	DLLC_DANRE	MYCA_DANRE	JAG1A_DANRE	A9JR96_DANRE	F1R8K4_DANRE	Q6WZB3_DANRE	B3DJD1_DANRE	O93616_DANRE	F1QNB9_DANRE	B8ZHI7_DANRE	B6V3E1_DANRE	A0A2R8QM70_DANRE	E7FF48_DANRE	A0A0J9YJ67_DANRE	A0A2R8QHE8_DANRE	F1QCA7_DANRE	B8JL25_DANRE	F1R8E1_DANRE	B8A5T9_DANRE	A0A2R8QI31_DANRE	F1R8Z8_DANRE	F1QD30_DANRE	F8W2W5_DANRE	A0A0G2L2B8_DANRE	F1QEA3_DANRE	A0A0G2L5S8_DANRE	E7FAJ1_DANRE	A5WUN6_DANRE
biological_process	GO:0000724	double-strand break repair via homologous recombination	32	101	0.316832	0.995454	0.00742372	1	1	MMS22_DANRE	NSE1_DANRE	RMI1_DANRE	TONSL_DANRE	NBN_DANRE	FAN1_DANRE	Q504I6_DANRE	A0A0R4IHR6_DANRE	B3DIX8_DANRE	F1Q905_DANRE	A0A0R4ITV5_DANRE	E7F8R0_DANRE	X1WE22_DANRE	X1WC12_DANRE	A0A2R8QQ92_DANRE	A0A2R8QH82_DANRE	X1WGQ9_DANRE	A0A2R8Q619_DANRE	E7F5C4_DANRE	A0A2R8RHK4_DANRE	A0A2R8RWF4_DANRE	E7F8G9_DANRE	A0A0R4IT14_DANRE	A5PN27_DANRE	E7FDC5_DANRE	A0A2R8QU85_DANRE	E7F643_DANRE	A0A2R8Q8U6_DANRE	F1QSQ9_DANRE	E7FGP7_DANRE	F1R8E8_DANRE	F8W2T2_DANRE
biological_process	GO:0042074	cell migration involved in gastrulation	32	110	0.290909	0.945839	0.078813	1	1	WNT5B_DANRE	TBX2_DANRE	Q53CM6_DANRE	Q98TU2_DANRE	Q52WY2_DANRE	F1QBZ9_DANRE	O93599_DANRE	Q90Y37_DANRE	Q6NV46_DANRE	A0A1S6L757_DANRE	Q9I9I2_DANRE	A0A0R4IGF2_DANRE	A0A2R8Q6S7_DANRE	F1QKB6_DANRE	E7FAI5_DANRE	A0A2R8QL08_DANRE	A0A0R4IFF8_DANRE	F1QGY4_DANRE	A0A0R4IQ86_DANRE	F1Q6J9_DANRE	A0A0R4IJR6_DANRE	A0A288CG34_DANRE	A0A2R8Q566_DANRE	A0A0R4IHT4_DANRE	E9QF53_DANRE	A2RRV7_DANRE	B8A6E8_DANRE	F1QBS8_DANRE	A0A2R8Q4B0_DANRE	A0A2R8Q3U7_DANRE	A0A0R4IL00_DANRE	F1QRP2_DANRE
biological_process	GO:0090090	negative regulation of canonical Wnt signaling pathway	32	107	0.299065	0.901267	0.141139	1	1	DACT1_DANRE	AXIN2_DANRE	TLE3B_DANRE	NKD2_DANRE	TLE3A_DANRE	NKD1_DANRE	AMER1_DANRE	Q7T289_DANRE	B3DJR5_DANRE	A0A2R8PYH8_DANRE	Q9PTS6_DANRE	A0A2R8QMD0_DANRE	E7EYJ6_DANRE	Q5TYS1_DANRE	A0A0R4IUN7_DANRE	A0A0R4IU21_DANRE	A0A288CG34_DANRE	A0A2R8QKD7_DANRE	B8A566_DANRE	F1QSP6_DANRE	A0A2R8RYM3_DANRE	B8A6E8_DANRE	F6NUK4_DANRE	F8W4Z3_DANRE	E7F064_DANRE	A0A0R4IWH7_DANRE	F1QC98_DANRE	A0A2R8Q3U7_DANRE	B8A567_DANRE	A0A1I7Q3W8_DANRE	F1QI44_DANRE	F1QGQ4_DANRE
biological_process	GO:0042060	wound healing	32	50	0.64	0.785712	0.265953	1	1	CF089_DANRE	O57418_DANRE	C0M005_DANRE	A0A0R4ID71_DANRE	A0A2R8PZA9_DANRE	A0A0R4IJ71_DANRE	E7FBB3_DANRE	A0A0R4IM38_DANRE	A5WV02_DANRE	F1Q4X8_DANRE	F1RA35_DANRE	A0A2R8QKW7_DANRE	A0A286YAI4_DANRE	A0A2R8QR17_DANRE	F8W4Q1_DANRE	A0A0R4INC4_DANRE	E9QCV2_DANRE	A0A2R8QEG3_DANRE	A0A2R8QLG6_DANRE	A0A2R8PVX9_DANRE	E7F8G7_DANRE	A0A286YBE9_DANRE	K7DYG8_DANRE	A0A2R8QB14_DANRE	A0A0R4IAS2_DANRE	A0A0R4I9M5_DANRE	I3ISA6_DANRE	F1QAU9_DANRE	A0A2R8RIJ1_DANRE	E9QFS3_DANRE	A0A0G2KQI8_DANRE	E7F4T0_DANRE
cellular_component	GO:0030864	cortical actin cytoskeleton	32	80	0.4	1	3.27143e-07	1	0	MYRIP_DANRE	Q6GMH1_DANRE	Q8AX99_DANRE	A0A2R8QFR4_DANRE	E9QFR8_DANRE	A0A0G2L1F5_DANRE	F1Q932_DANRE	F1R7V2_DANRE	F1QDK4_DANRE	F8W4C0_DANRE	A0A0H2UKN4_DANRE	E7EXG2_DANRE	A0A2R8QCI9_DANRE	F1R0H8_DANRE	F1QXB0_DANRE	F1QLX6_DANRE	Q1LWS2_DANRE	A0A0R4IXX0_DANRE	F1QIB3_DANRE	A0A0R4IS21_DANRE	A0A0R4I9Q9_DANRE	A0A0R4IS11_DANRE	E7F192_DANRE	F1R8E9_DANRE	A0A2R8Q3W1_DANRE	F1Q6C1_DANRE	A0A2R8QBL5_DANRE	A0A0H2UKT2_DANRE	A2BGE8_DANRE	A0A0R4IF13_DANRE	F1QXP9_DANRE	F1QC58_DANRE
biological_process	GO:0046777	protein autophosphorylation	32	406	0.0788177	1.04823e-15	1	0	1	VGFR3_DANRE	B0S6T6_DANRE	B0S6F4_DANRE	Q6DHN7_DANRE	Q6NYW1_DANRE	D1L3Y5_DANRE	B0S6T7_DANRE	A2BG23_DANRE	X1WG33_DANRE	X1WGR0_DANRE	A0A2R8Q844_DANRE	Q1LWJ4_DANRE	F1R487_DANRE	F1R8Q9_DANRE	A0A2R8PYI7_DANRE	F6NJB9_DANRE	F1QNX5_DANRE	F1QJV2_DANRE	A0A0R4IGP2_DANRE	B0S6U4_DANRE	X1WCA9_DANRE	F1R8K8_DANRE	A0A286Y9P5_DANRE	A0A0H2UKA0_DANRE	E9QER9_DANRE	A0A2R8QPN8_DANRE	A0A0R4II39_DANRE	E9QEU8_DANRE	E7FH13_DANRE	A0A2R8QR15_DANRE	A0A2R8QM53_DANRE	R4GEG6_DANRE
molecular_function	GO:0005506	iron ion binding	31	267	0.116105	1.54238e-06	0.999999	0	1	PHF2_DANRE	C27C1_DANRE	FBXL5_DANRE	Q66I26_DANRE	Q6IWP4_DANRE	X1WG80_DANRE	F1Q5R8_DANRE	M1ZMM0_DANRE	A0A0R4IQ46_DANRE	E7FCW9_DANRE	E7F3G8_DANRE	F1Q9I2_DANRE	Z4YHZ5_DANRE	Q1LW04_DANRE	A0A2R8Q1T4_DANRE	Q08BZ2_DANRE	F1QKM3_DANRE	F1RA02_DANRE	X1WF32_DANRE	Q1LWZ5_DANRE	A0A0G2KPF8_DANRE	A0A2R8QKC5_DANRE	A0A0N4SU47_DANRE	A0A0R4I9E8_DANRE	Q1LVZ9_DANRE	F1QHW0_DANRE	Q1LUX9_DANRE	F1QNB0_DANRE	A5WWJ0_DANRE	E7F022_DANRE	A0A2R8QCI6_DANRE
cellular_component	GO:0098793	presynapse	31	144	0.215278	0.999963	5.47948e-05	1	0.02	K1109_DANRE	DNMBP_DANRE	SCRIB_DANRE	Q1MT71_DANRE	A0A2R8QAF3_DANRE	A0A0R4IRH4_DANRE	X1WBM9_DANRE	U3JA74_DANRE	X1WGL1_DANRE	F1R6L2_DANRE	A0A2R8PZP4_DANRE	A0A2R8Q966_DANRE	A0A2R8QR05_DANRE	Q1LYG9_DANRE	F8W4G8_DANRE	F1QM13_DANRE	Q1LYH0_DANRE	A0A0R4IWJ1_DANRE	F1RAE9_DANRE	F1QCM5_DANRE	A0A2R8QJ16_DANRE	A0A2R8QI28_DANRE	A8E7E7_DANRE	E7F1L2_DANRE	A0A286Y8L1_DANRE	F1QMN5_DANRE	A0A2R8QB02_DANRE	A0A2R8QJT7_DANRE	A0A2R8QBP3_DANRE	A0A2R8QM97_DANRE	A0A0R4IQM9_DANRE
molecular_function	GO:0004222	metalloendopeptidase activity	31	221	0.140271	0.00124323	0.999328	0.343	1	B0S6B9_DANRE	A0A0R4IFD3_DANRE	A0A2R8Q0T5_DANRE	E7FE04_DANRE	E7FEN5_DANRE	X1WHI6_DANRE	F1RDA9_DANRE	A0A2R8QQ35_DANRE	E7F6J8_DANRE	E7FFX0_DANRE	E7FFQ4_DANRE	F1R2Z7_DANRE	A0A2R8QSN0_DANRE	A0A2R8RIW6_DANRE	A0A2R8QKV2_DANRE	E7F6N6_DANRE	F8W3A9_DANRE	F1R544_DANRE	A0A0R4ISF7_DANRE	F1R8A1_DANRE	A0A2R8Q748_DANRE	Q1L985_DANRE	B0R0F2_DANRE	F1QU24_DANRE	F1Q5Q4_DANRE	E7FEJ5_DANRE	F1RBI6_DANRE	E7F419_DANRE	A0A286Y999_DANRE	A0A2R8Q3V6_DANRE	F1R6Q4_DANRE
cellular_component	GO:0031514	motile cilium	31	63	0.492063	1	2.05413e-07	1	0	CF161_DANRE	BBS2_DANRE	CF206_DANRE	DRC2_DANRE	DRC1_DANRE	B0UYB0_DANRE	A9C3Q6_DANRE	A3KNM0_DANRE	A0A2R8RQB1_DANRE	A0A2R8RI11_DANRE	A0A0R4IJP6_DANRE	E7FCR2_DANRE	E9QC56_DANRE	A0A1D5NT12_DANRE	I3ITD2_DANRE	A2BG35_DANRE	F1QDR3_DANRE	A0A2R8QP75_DANRE	E7FGT8_DANRE	F1Q6X8_DANRE	F1RAF1_DANRE	A0A2R8QNC3_DANRE	A3QK38_DANRE	F1Q8Y1_DANRE	F1QFD6_DANRE	A0A2R8QSD0_DANRE	E7EZB9_DANRE	F6P8U0_DANRE	F1QLA3_DANRE	F1R185_DANRE	A0A2R8RY46_DANRE
biological_process	GO:0007224	smoothened signaling pathway	31	64	0.484375	0.99991	0.000189279	1	0.262	STIL_DANRE	PTC1_DANRE	TALD3_DANRE	DISP1_DANRE	B0S6T1_DANRE	A8WFS2_DANRE	E7F551_DANRE	A0A2R8Q5A2_DANRE	F1QH64_DANRE	F1R8E2_DANRE	F1QCK4_DANRE	F1Q7Y4_DANRE	A0A2R8RNK5_DANRE	F1QEX9_DANRE	A0A0R4INQ1_DANRE	A0A0R4IDY0_DANRE	Q5RGQ4_DANRE	A0A2R8QST5_DANRE	A0A2R8QM00_DANRE	F1QHX5_DANRE	A0A0R4IA72_DANRE	F1R5E2_DANRE	Q1MTA8_DANRE	A0A2R8QNB7_DANRE	F1QSH8_DANRE	E7F544_DANRE	E9QFT3_DANRE	F1QAC4_DANRE	X1WHU2_DANRE	F1Q4N0_DANRE	A0A2R8QMX9_DANRE
molecular_function	GO:0008083	growth factor activity	31	219	0.141553	0.00154176	0.999159	0.4	1	TSP4B_DANRE	NTF7_DANRE	A9JRD6_DANRE	Q6NZ01_DANRE	A0A2R8Q0D8_DANRE	Q7SX66_DANRE	Q68IN2_DANRE	B3DHR9_DANRE	B8ZHI7_DANRE	B0UYR0_DANRE	Q9W6I6_DANRE	A2CEI3_DANRE	A8E7B8_DANRE	E7FBB3_DANRE	A0A2R8RHW9_DANRE	F1R5Z7_DANRE	A0A2R8RLC3_DANRE	A0A0G2KD75_DANRE	F1QWZ9_DANRE	A0A2R8RHT0_DANRE	F1QR36_DANRE	E7F9J0_DANRE	A0A0G2KKG9_DANRE	A0A2R8QRD6_DANRE	F1Q793_DANRE	F1QAD6_DANRE	F8W4A6_DANRE	A0A2R8RPQ4_DANRE	E7EZR4_DANRE	A0A2R8PYF1_DANRE	F1QS30_DANRE
biological_process	GO:0007605	sensory perception of sound	31	100	0.31	0.910798	0.128914	1	1	PO4F3_DANRE	RIPR2_DANRE	Q9DGG8_DANRE	E9QGZ3_DANRE	E9QIR1_DANRE	J9JI18_DANRE	F8W622_DANRE	E7F106_DANRE	F1R4R9_DANRE	F1R527_DANRE	E7FGA0_DANRE	F1Q5R9_DANRE	A0A1D5NS53_DANRE	E9QCU8_DANRE	E7FA98_DANRE	A0A0R4IA41_DANRE	E9QEA2_DANRE	F1Q6Q6_DANRE	A0A0G2KWQ2_DANRE	E9QEL6_DANRE	A0A2R8S0B6_DANRE	A0A286YAF1_DANRE	F1R0L2_DANRE	E9QGF5_DANRE	F1R807_DANRE	A0A286Y9F5_DANRE	A0A2R8QKW8_DANRE	E7F2D8_DANRE	F1QK57_DANRE	A0A286YAA1_DANRE	E9QFU5_DANRE
cellular_component	GO:0005770	late endosome	31	94	0.329787	0.993754	0.00957449	1	0.98	KDISB_DANRE	A9JRX6_DANRE	B0S5J2_DANRE	E7FBN6_DANRE	Q2TTK0_DANRE	B8A6H1_DANRE	F1R5J4_DANRE	A0A2R8RJG6_DANRE	A0A2R8PYV4_DANRE	A0A2R8QAD7_DANRE	A0A0N5E8A0_DANRE	E9QGX9_DANRE	A0A2R8Q8F0_DANRE	A0A2R8Q5M4_DANRE	A0A0R4IY07_DANRE	F1Q4W5_DANRE	A0A2R8QNK8_DANRE	A0A2R8QGM1_DANRE	A0A0R4IBW6_DANRE	E9QI83_DANRE	F1QPF1_DANRE	E9QJ00_DANRE	A0A2R8QKP7_DANRE	A0A2R8QLQ3_DANRE	A0A2R8QKK4_DANRE	A0A2R8Q663_DANRE	E7F5Z0_DANRE	A0A2R8RWY9_DANRE	A0A2R8Q4T5_DANRE	E7F2R4_DANRE	A0A2R8PZ15_DANRE
molecular_function	GO:0017056	structural constituent of nuclear pore	31	46	0.673913	1	8.32486e-11	1	0	NUP85_DANRE	Q6NYN9_DANRE	E9QIQ3_DANRE	A0A2R8RZS9_DANRE	A0A0R4IVZ0_DANRE	A0A0R4IG74_DANRE	A0A0R4IZD5_DANRE	F1R2H0_DANRE	Q1L8Z0_DANRE	A0A0R4IAQ8_DANRE	F1QE76_DANRE	F1R4A0_DANRE	F1QJ18_DANRE	F1QHF5_DANRE	Q1L8Z1_DANRE	E7F981_DANRE	A0A0R4IYL8_DANRE	A0A2R8Q4U1_DANRE	A0A0R4IBW5_DANRE	A0A0H2UKK7_DANRE	B0R0Z3_DANRE	E9QEC4_DANRE	E7F5M0_DANRE	A0A2R8QTE7_DANRE	X1WEZ6_DANRE	F1Q953_DANRE	A0A2R8QTU4_DANRE	A0A2R8Q9H4_DANRE	F1QWS2_DANRE	Q5RI09_DANRE	E9QGM4_DANRE
molecular_function	GO:0008569	minus-end-directed microtubule motor activity	31	47	0.659574	1	1.92051e-10	1	0	F1R672_DANRE	F1Q6J7_DANRE	A0A0R4IY79_DANRE	E9QBH9_DANRE	A0A2R8RQB1_DANRE	A0A0R4IHI4_DANRE	F1QB07_DANRE	A0A2R8QB87_DANRE	E9QH47_DANRE	K7DY80_DANRE	A0A2R8Q6Y8_DANRE	A0A1D5NT12_DANRE	A0A2R8QMF4_DANRE	I3ITD2_DANRE	A0A2R8QCS6_DANRE	A2BG35_DANRE	A0A2R8QR54_DANRE	A0A2R8QP75_DANRE	E7FGT8_DANRE	E7FGS8_DANRE	F1RAF1_DANRE	F1Q8L1_DANRE	A0A0G2L009_DANRE	A0A2R8QBQ8_DANRE	E7EZB9_DANRE	A0A2R8RL41_DANRE	F1QLA3_DANRE	A0A2R8Q3X2_DANRE	A0A2R8QG79_DANRE	F1R185_DANRE	F1Q8U4_DANRE
biological_process	GO:0001708	cell fate specification	30	58	0.517241	1	3.19129e-08	1	0	TBX6L_DANRE	TBX5A_DANRE	TBX6_DANRE	TBX2_DANRE	TBXTA_DANRE	PAX2A_DANRE	A1IJT6_DANRE	Q98TU2_DANRE	D1YT98_DANRE	B3DJF0_DANRE	Q6TGI4_DANRE	E3W6T6_DANRE	F1R7N7_DANRE	F1Q5T5_DANRE	A0A286YBQ8_DANRE	B8JL25_DANRE	A0A2R8QB37_DANRE	B8JKS6_DANRE	G1K2W9_DANRE	X1WGE3_DANRE	A0A0R4IQK3_DANRE	A0A2R8RYW1_DANRE	Q90466_DANRE	B5DE34_DANRE	E7F064_DANRE	A0A2R8PW40_DANRE	F1QV06_DANRE	A0A2R8PZ52_DANRE	B0R122_DANRE	E7FCP0_DANRE
biological_process	GO:0006888	endoplasmic reticulum to Golgi vesicle-mediated transport	30	136	0.220588	0.895332	0.140814	1	1	PEF1_DANRE	KLH12_DANRE	COPB_DANRE	Q7ZW40_DANRE	A0A0R4IZ17_DANRE	Q6P0G5_DANRE	F1QI20_DANRE	A0A0R4IYT6_DANRE	A0A2R8RUW2_DANRE	F1R5F2_DANRE	F1QIQ6_DANRE	E7F2J5_DANRE	A0A0G2KET2_DANRE	A0A0R4IGM8_DANRE	E7FA12_DANRE	A0A2R8Q2B3_DANRE	A0A2R8QJR2_DANRE	A0A2R8Q223_DANRE	F1QUF6_DANRE	B0R171_DANRE	A0A2R8QKU0_DANRE	F1REE8_DANRE	F1R5N2_DANRE	F1QYH5_DANRE	Q5SP05_DANRE	F1R5G5_DANRE	E9QF97_DANRE	F1R7S1_DANRE	A0A2R8QLN9_DANRE	F1QFP8_DANRE
biological_process	GO:0048701	embryonic cranial skeleton morphogenesis	30	93	0.322581	0.994498	0.00800036	1	1	LEO1_DANRE	WNT5B_DANRE	DISP1_DANRE	F1QQ50_DANRE	Q6NYI3_DANRE	B0S576_DANRE	B6V3E1_DANRE	F1R3T7_DANRE	A0A0R4IQR0_DANRE	F1R259_DANRE	F1QV43_DANRE	A0A0R4IUG1_DANRE	F1Q597_DANRE	A0A2R8RSI4_DANRE	B0V2X4_DANRE	B8A5T9_DANRE	A0A0R4IHI9_DANRE	Q6P975_DANRE	F6P9Q3_DANRE	E7F2F7_DANRE	F1R0Z0_DANRE	A0A0R4IPF3_DANRE	F6PBE4_DANRE	B0S577_DANRE	F1QUT5_DANRE	F1QUT4_DANRE	X1WG57_DANRE	A0A2R8QRQ5_DANRE	F1QGL1_DANRE	F1Q834_DANRE
biological_process	GO:0046854	phosphatidylinositol phosphate biosynthetic process	30	90	0.333333	0.980475	0.0333116	1	1	P4K2B_DANRE	P4K2A_DANRE	PI4KB_DANRE	A9JRB4_DANRE	B0EVP9_DANRE	A0A2R8Q2X0_DANRE	F1RBR8_DANRE	A0A0R4IFZ8_DANRE	B3DHG9_DANRE	A0A0R4IUJ2_DANRE	F1QAD7_DANRE	B0EVP5_DANRE	A0A2R8Q7V8_DANRE	F1RCP0_DANRE	F1QB84_DANRE	A0A2R8Q031_DANRE	F1QI15_DANRE	B0V3R8_DANRE	A0A2R8QSP1_DANRE	A0A0G2L6J0_DANRE	A0A0R4IYS3_DANRE	L0N8W2_DANRE	Q7ZVW3_DANRE	F1Q9F3_DANRE	Q1L913_DANRE	F1RB17_DANRE	F6NVP6_DANRE	F8W4V1_DANRE	F6NMW9_DANRE	A0A2R8QIU7_DANRE
cellular_component	GO:0030176	integral component of endoplasmic reticulum membrane	30	151	0.198675	0.295717	0.764579	1	1	FITM1_DANRE	EXT1A_DANRE	EXT1B_DANRE	EXT1C_DANRE	ELOV6_DANRE	A0A0R4IT00_DANRE	Q29RC8_DANRE	Q1LXR3_DANRE	A0A286YB68_DANRE	F1R6G6_DANRE	A0A0R4IF82_DANRE	A0A0R4IH69_DANRE	A0A2R8Q710_DANRE	F1QFM6_DANRE	A0A2R8QNM4_DANRE	E7F921_DANRE	A0A2R8QSB0_DANRE	A0A0R4IAT9_DANRE	A0A0R4IRP1_DANRE	F1R0A9_DANRE	F1R9S8_DANRE	Q1LY88_DANRE	A0A2R8RIM0_DANRE	B8A4D7_DANRE	F1QJA1_DANRE	A0A0R4IGW7_DANRE	E9QCU6_DANRE	E9QFY1_DANRE	F8W5I1_DANRE	E7F049_DANRE
biological_process	GO:0007416	synapse assembly	30	61	0.491803	0.999861	0.00026933	1	0.375	Q803J6_DANRE	Q6GMH1_DANRE	Q5BJ09_DANRE	A0A0R4IFH8_DANRE	F8W4E9_DANRE	F1QTQ5_DANRE	A0A2R8PZW4_DANRE	E7F957_DANRE	A0A2R8QRQ4_DANRE	E7EXG2_DANRE	F1Q6T0_DANRE	F1QC95_DANRE	A0A0A0MPU2_DANRE	A0A2R8QBA1_DANRE	F1QY51_DANRE	F1QMW3_DANRE	A0A2R8RME3_DANRE	M9MMA7_DANRE	A0A2R8QKH9_DANRE	F1QIB3_DANRE	F1R721_DANRE	F1R4P6_DANRE	F1Q4Z1_DANRE	M9MMC0_DANRE	F1R221_DANRE	E7FGK4_DANRE	E9QBZ6_DANRE	A0A2R8RJQ6_DANRE	A0A140LGP1_DANRE	E7EZD1_DANRE
biological_process	GO:0001666	response to hypoxia	30	93	0.322581	0.994909	0.0089937	1	1	ARNT2_DANRE	HEM0_DANRE	NRP1A_DANRE	REST_DANRE	Q803J6_DANRE	B3DJD1_DANRE	F1R3C6_DANRE	Q7T3L3_DANRE	B0UXS0_DANRE	A0A2R8QM70_DANRE	A0A2R8QNC7_DANRE	A0A2R8QRH1_DANRE	E7FEZ0_DANRE	B8JI14_DANRE	Q5TYS1_DANRE	A0A286YAP4_DANRE	A0A0R4IB28_DANRE	A0A0R4IBR4_DANRE	F1QNG7_DANRE	F1QYL2_DANRE	A0A2R8QI31_DANRE	A0A2R8RLT5_DANRE	A0A2R8Q2J0_DANRE	A0A0R4IZV0_DANRE	E7F3Z5_DANRE	E7EZR4_DANRE	F1QYX5_DANRE	E9QBZ6_DANRE	A0A1L1QZE4_DANRE	A0A286Y8A4_DANRE
biological_process	GO:0001501	skeletal system development	30	99	0.30303	0.892259	0.125986	1	1	CRA1B_DANRE	COG4_DANRE	WNT5B_DANRE	B3DLK0_DANRE	Q6NYI3_DANRE	Q5I2A9_DANRE	O93599_DANRE	Q2LDA1_DANRE	Q6NV46_DANRE	A0A1S6L757_DANRE	A0A0R4IGF2_DANRE	A0A0R4IMA3_DANRE	F1QSR0_DANRE	X1WFR7_DANRE	A0A2R8RSI4_DANRE	A0A0R4IHB0_DANRE	Q6P975_DANRE	F1QEZ8_DANRE	A0A2R8QK78_DANRE	A0A0R4IH08_DANRE	F8W4Z3_DANRE	F1R1L5_DANRE	F1QFM9_DANRE	A0A0R4IWH7_DANRE	E7EXE7_DANRE	F1QUT5_DANRE	A0A0R4IXT8_DANRE	F1QUT4_DANRE	A0A2R8QTC7_DANRE	A0A2R8QRQ5_DANRE
cellular_component	GO:0005643	nuclear pore	30	51	0.588235	1	9.58438e-11	1	0	NUP42_DANRE	XPO4_DANRE	XPOT_DANRE	A0A0R4IWU7_DANRE	F1RDC5_DANRE	A0A0R4IVZ0_DANRE	F1R2H0_DANRE	B0S5D2_DANRE	A0A2R8QKF9_DANRE	B0S5I6_DANRE	A0A0R4IAQ8_DANRE	F1QE76_DANRE	F1R4A0_DANRE	E7F981_DANRE	A0A0R4IYL8_DANRE	A0A2R8Q4U1_DANRE	A0A0H2UKK7_DANRE	F1Q5C6_DANRE	A0A2R8QJ57_DANRE	B0R0Z3_DANRE	E7F5M0_DANRE	X1WEZ6_DANRE	F1Q953_DANRE	B0S5C8_DANRE	F1QWS2_DANRE	B8JMJ5_DANRE	X1WCS8_DANRE	F1Q591_DANRE	Q5RI09_DANRE	E9QGM4_DANRE
biological_process	GO:0006898	receptor-mediated endocytosis	30	64	0.46875	0.997555	0.00380233	1	1	B0R024_DANRE	F1QY34_DANRE	A0A2R8PYH8_DANRE	Q6GMH1_DANRE	Q7ZZT0_DANRE	F1QYF2_DANRE	A0A0R4IUN7_DANRE	A0A0R4IVD8_DANRE	R4GEK0_DANRE	F1QJH2_DANRE	A0A0R4IU21_DANRE	E7EXG2_DANRE	B8A566_DANRE	F1QS67_DANRE	A0A2R8RYM3_DANRE	E7FBE5_DANRE	Q5VSI7_DANRE	A0A0R4IU05_DANRE	F1QIB3_DANRE	X1WHG6_DANRE	A0A0R4INM0_DANRE	E9QGD4_DANRE	F1QC98_DANRE	A0A0R4IAG0_DANRE	A0A0H2UKL4_DANRE	B8A567_DANRE	A0A0R4IQI7_DANRE	U3JAA3_DANRE	A0A0R4I9I8_DANRE	F1QGQ4_DANRE
biological_process	GO:0008154	actin polymerization or depolymerization	30	71	0.422535	0.995171	0.00676914	1	1	Q1RLT7_DANRE	F1Q6K8_DANRE	X1WEC4_DANRE	Q1JPU9_DANRE	B0V218_DANRE	A0A2R8Q3W8_DANRE	F1QVU3_DANRE	A0A0R4IWX6_DANRE	I3ISX7_DANRE	B0V219_DANRE	A0A2R8RPR6_DANRE	X1WE86_DANRE	A0A2R8QCX4_DANRE	I3ITI8_DANRE	A0A0R4ILA7_DANRE	A0A2R8QEN6_DANRE	F1QU62_DANRE	I3IRV8_DANRE	A0A2R8Q1F3_DANRE	F1R3V3_DANRE	A0A2R8Q0D6_DANRE	E9QJ38_DANRE	I3IS72_DANRE	A0A2R8QUS0_DANRE	B0V217_DANRE	A0A2R8Q7K6_DANRE	I3IS53_DANRE	F1R187_DANRE	U3JAV9_DANRE	X1WDI1_DANRE
biological_process	GO:0030334	regulation of cell migration	29	101	0.287129	0.423896	0.621331	1	1	PLXA3_DANRE	HACE1_DANRE	AMOL2_DANRE	Q7SX66_DANRE	B3DHR9_DANRE	E7F8Q6_DANRE	F1QBC0_DANRE	F1QZQ3_DANRE	A0A286Y9M1_DANRE	A0A2R8PX85_DANRE	E7FGY1_DANRE	F1QYU0_DANRE	A0A2R8Q3J7_DANRE	E7FCE7_DANRE	Q5RH91_DANRE	B8A5S6_DANRE	F1Q7U0_DANRE	E9QFX4_DANRE	F1QL76_DANRE	F1RE66_DANRE	A0A0R4II20_DANRE	F1Q6L2_DANRE	F1R7J5_DANRE	B0V1S6_DANRE	A0A2R8QSX8_DANRE	A0A0R4IRZ9_DANRE	E7F1Y0_DANRE	F1R9B8_DANRE	A0A140LGG1_DANRE
molecular_function	GO:0042803	protein homodimerization activity	29	139	0.208633	0.384057	0.692196	1	1	RBM44_DANRE	GOGA5_DANRE	NRF1_DANRE	OSTA_DANRE	RNF8_DANRE	SAC2_DANRE	TEN3_DANRE	PRDM9_DANRE	RFP4A_DANRE	RFIP3_DANRE	TEN4_DANRE	IKKA_DANRE	F1QRC8_DANRE	A0A2R8Q360_DANRE	F1R376_DANRE	F1QU90_DANRE	A8E7C6_DANRE	F1RA92_DANRE	F8W4G8_DANRE	A0A286Y8J7_DANRE	I3IRX0_DANRE	F1RC82_DANRE	Q90Z98_DANRE	A0A2R8Q498_DANRE	F1Q7X5_DANRE	F1QTW9_DANRE	F1QK75_DANRE	A0A2R8RU11_DANRE	A0A286Y8Z9_DANRE
molecular_function	GO:0030215	semaphorin receptor binding	29	85	0.341176	0.995659	0.00849509	1	1	SE3AB_DANRE	SEM4E_DANRE	SE3AA_DANRE	Q1LXC4_DANRE	F1QNC4_DANRE	Q1LV94_DANRE	E7F898_DANRE	A0A2R8Q0R5_DANRE	A0A2R8QNE4_DANRE	A0A286Y9T7_DANRE	A0A2R8QD30_DANRE	A0A2R8QAH3_DANRE	F1QU86_DANRE	E7FEP0_DANRE	A0A2R8QJX7_DANRE	F1QGW9_DANRE	A0A2R8QIM7_DANRE	A0A0R4IDW5_DANRE	Q1LYS1_DANRE	B8JMB1_DANRE	X1WF24_DANRE	A0A0G2KQ30_DANRE	F1RB05_DANRE	F1QCZ2_DANRE	F1R7Z2_DANRE	F1R501_DANRE	A0A286YAK7_DANRE	A0A0R4IR66_DANRE	A0A2R8Q2W2_DANRE
biological_process	GO:0030902	hindbrain development	29	77	0.376623	0.995025	0.00766618	1	1	RN152_DANRE	HN1BA_DANRE	MIB1_DANRE	CE290_DANRE	PAX6_DANRE	PO5F1_DANRE	RFNG_DANRE	OTX2_DANRE	ZN703_DANRE	PAX2A_DANRE	Q6NYI3_DANRE	Q9YHZ8_DANRE	Q6DEL0_DANRE	A0A0R4IQL7_DANRE	Q90VY7_DANRE	Q8QGU1_DANRE	F1QWG8_DANRE	A0A2R8QET6_DANRE	A0A2R8Q4C2_DANRE	A0A2R8RSI4_DANRE	A0A2R8QPK5_DANRE	Q6P975_DANRE	A0A0R4IZ96_DANRE	A3QK40_DANRE	A0A2R8QBB5_DANRE	F1QUT5_DANRE	B0R1B8_DANRE	F1QUT4_DANRE	A0A2R8QRQ5_DANRE
biological_process	GO:0001570	vasculogenesis	29	76	0.381579	0.998528	0.00314138	1	0.994	SE3AA_DANRE	NPS4L_DANRE	MIB1_DANRE	COL12_DANRE	NRP1A_DANRE	YAP1_DANRE	HXD4A_DANRE	A9JR96_DANRE	Q6EF99_DANRE	Q6EFA1_DANRE	B0S6D0_DANRE	B3DKP1_DANRE	Q30JB6_DANRE	Q8AW20_DANRE	Q6PEG4_DANRE	F1RD88_DANRE	Q6EFA0_DANRE	A0A2R8S045_DANRE	A0A2R8Q436_DANRE	B0S790_DANRE	F1QN93_DANRE	F1QBD0_DANRE	F6P5J8_DANRE	B8JL25_DANRE	A0A2R8Q5A3_DANRE	A8DZ67_DANRE	A0A0G2KQ62_DANRE	A0A2R8Q947_DANRE	A0A2R8RXT0_DANRE
biological_process	GO:0070507	regulation of microtubule cytoskeleton organization	29	62	0.467742	0.99977	0.000417574	1	0.521	Q1LXN3_DANRE	A4IG44_DANRE	A0A2R8Q9F8_DANRE	A0A2R8QS69_DANRE	A0A2R8QID4_DANRE	F1RBX3_DANRE	A0A2R8QNV1_DANRE	A0A2R8QLR4_DANRE	E7F624_DANRE	F1R574_DANRE	A0A0R4IFC6_DANRE	A0A2R8RHV3_DANRE	A0A0R4IA44_DANRE	A0A2R8RR49_DANRE	E7FFL4_DANRE	A0A2R8RPV5_DANRE	A2BFP0_DANRE	A0A2R8Q3V4_DANRE	E9QF83_DANRE	A0A2R8QNM9_DANRE	A0A2R8QFA0_DANRE	B8JIT9_DANRE	A0A2R8QUA7_DANRE	E7FFM0_DANRE	E7F243_DANRE	A0A2R8QUX6_DANRE	A0A286YBW7_DANRE	X1WFX8_DANRE	E7FAY9_DANRE
biological_process	GO:0030509	BMP signaling pathway	29	92	0.315217	0.998515	0.00239701	1	0.981	FCHO1_DANRE	SHP2A_DANRE	YAP1_DANRE	TBX2_DANRE	Q503D7_DANRE	Q1RLX1_DANRE	B0S8I4_DANRE	Q8JFB0_DANRE	B3DJG0_DANRE	E7FFZ5_DANRE	Q9W629_DANRE	Q9W6I6_DANRE	Q6IYD1_DANRE	Q1L8R8_DANRE	F1QWZ9_DANRE	A0A2R8QF71_DANRE	B0V0H4_DANRE	F8W5D4_DANRE	F6NL73_DANRE	F1RC55_DANRE	F8W4A6_DANRE	A0A2R8QB11_DANRE	F1RC58_DANRE	A0A2R8Q6G1_DANRE	F1QS48_DANRE	F1QH44_DANRE	E9QDH2_DANRE	A0A0R4IZG7_DANRE	F1QGL3_DANRE
biological_process	GO:1904888	cranial skeletal system development	29	97	0.298969	0.998425	0.00228474	1	0.978	UBP37_DANRE	DICER_DANRE	MYSM1_DANRE	Q91430_DANRE	E7F2D0_DANRE	B3DGQ7_DANRE	E7F0G2_DANRE	Q90XD1_DANRE	A0A2R8QU47_DANRE	E9QJC3_DANRE	F1QG48_DANRE	E7FG55_DANRE	A0A2R8QN12_DANRE	Q1LV27_DANRE	A0A0R4IB93_DANRE	E7F165_DANRE	F1Q6P8_DANRE	Q6P295_DANRE	A0A2R8Q6Q8_DANRE	A0A2R8Q8E2_DANRE	X1WH68_DANRE	A5WW41_DANRE	E7FDS3_DANRE	F1Q6K1_DANRE	F1QG49_DANRE	F1Q7Y7_DANRE	E7EY58_DANRE	X1WC30_DANRE	F1QGL1_DANRE
biological_process	GO:0043065	positive regulation of apoptotic process	29	174	0.166667	0.00118803	0.999363	0.709	1	JMY_DANRE	CASPB_DANRE	SCRIB_DANRE	TRADD_DANRE	A5PF31_DANRE	A0JML4_DANRE	E9QHI3_DANRE	B0S8I4_DANRE	Q7T2L8_DANRE	E9QID1_DANRE	A0A2R8RXU8_DANRE	A0A2R8QRH1_DANRE	E7FEZ0_DANRE	A0A0R4INY5_DANRE	F1RAN5_DANRE	A0A2R8QKJ7_DANRE	A0A2R8QF71_DANRE	F1R567_DANRE	F6PDT3_DANRE	A0A2R8RLT5_DANRE	F1Q782_DANRE	A0A2R8QB11_DANRE	F8W4Z3_DANRE	E9QHG1_DANRE	F1Q7K7_DANRE	F1Q588_DANRE	A0A0R4IWH7_DANRE	E7FGT1_DANRE	F1QGL3_DANRE
biological_process	GO:0061371	determination of heart left/right asymmetry	29	101	0.287129	0.781662	0.261288	1	1	DAAF1_DANRE	GPR22_DANRE	OFD1_DANRE	UBX10_DANRE	TBXTA_DANRE	NEK8_DANRE	DZIP1_DANRE	Q7ZUI3_DANRE	F1Q9Z5_DANRE	B3DFN8_DANRE	Q1RLX1_DANRE	B3DJG0_DANRE	Q9W6I6_DANRE	Q9IAJ4_DANRE	F1Q6J7_DANRE	A0A2R8QMD0_DANRE	A0A2R8RI11_DANRE	E7EXH4_DANRE	E9QH47_DANRE	K7DY80_DANRE	B8A5N9_DANRE	F1QSP6_DANRE	A0A2R8QN32_DANRE	B3DKC1_DANRE	F1QAD6_DANRE	F6NUK4_DANRE	F1QFD6_DANRE	Q5VSI5_DANRE	A0A0R4IZG7_DANRE
biological_process	GO:0006606	protein import into nucleus	29	73	0.39726	0.999811	0.000432202	1	0.533	NUP85_DANRE	XPO2_DANRE	HIKES_DANRE	A2VD24_DANRE	Q6DKF7_DANRE	B0S6M2_DANRE	E9QIQ3_DANRE	A0A286Y8U4_DANRE	E7FDD4_DANRE	E7F8C0_DANRE	A0A0R4IVZ0_DANRE	A0A0R4IG74_DANRE	F1QE76_DANRE	F1QIP3_DANRE	A0A2R8RZX0_DANRE	A0A2R8Q4D0_DANRE	A0A0R4IYL8_DANRE	A0A0R4IMZ8_DANRE	A0A0H2UKK7_DANRE	E9QEC4_DANRE	E7F5M0_DANRE	A0A2R8QTE7_DANRE	F1Q953_DANRE	A0A2R8Q9H4_DANRE	A0A2R8RYW6_DANRE	B0UXP3_DANRE	F1R750_DANRE	F6P5X4_DANRE	Q5RI09_DANRE
cellular_component	GO:0005581	collagen trimer	29	71	0.408451	0.999695	0.000682834	1	0.26	CRA1B_DANRE	COL12_DANRE	B3DLK0_DANRE	E7FA40_DANRE	Q2LDA1_DANRE	F1QVG7_DANRE	E7FB76_DANRE	F1QM25_DANRE	A0A2R8QFF2_DANRE	A0A0R4IMA3_DANRE	X1WFR7_DANRE	F1RCF3_DANRE	K7DYH0_DANRE	F1Q5U3_DANRE	A0A0R4IHB0_DANRE	X1WF98_DANRE	C0H5W1_DANRE	A0A0R4IB74_DANRE	E7EXF3_DANRE	F1QAB3_DANRE	F1R9Y1_DANRE	F1Q924_DANRE	E7FG81_DANRE	E7EXE7_DANRE	I3IT32_DANRE	E9QEJ2_DANRE	F1QT12_DANRE	Q1LYI5_DANRE	A0A2R8QTC7_DANRE
biological_process	GO:0035023	regulation of Rho protein signal transduction	29	71	0.408451	0.899918	0.136608	1	1	RGRF2_DANRE	KANK2_DANRE	E7FF78_DANRE	A0A0R4IID9_DANRE	F1QCK8_DANRE	A2RUX1_DANRE	F8W5Y3_DANRE	F1REH9_DANRE	A0A0R4IPD6_DANRE	F1RB67_DANRE	A0A2R8QEH5_DANRE	X1WCM0_DANRE	F1R7S0_DANRE	A0A0R4IX73_DANRE	A0A286YAR8_DANRE	E7F7V2_DANRE	A0A2R8QK84_DANRE	A0A140LG29_DANRE	F1Q7X0_DANRE	A0A2R8Q2V3_DANRE	A0A2R8QA33_DANRE	F1R3K0_DANRE	A0A2R8Q2H2_DANRE	A0A2R8Q062_DANRE	E9QBW9_DANRE	A0A2R8RWY4_DANRE	A0A0G2KF42_DANRE	E7FBY0_DANRE	B8JIS3_DANRE
biological_process	GO:0045104	intermediate filament cytoskeleton organization	29	38	0.763158	1	2.4593e-11	1	0	FA83H_DANRE	A0A0R4ID71_DANRE	A0A2R8PZA9_DANRE	A0A0R4IJ71_DANRE	A5WV02_DANRE	F1Q4X8_DANRE	F1RA35_DANRE	A0A2R8QKW7_DANRE	A0A286YAI4_DANRE	A0A2R8QR17_DANRE	F8W4Q1_DANRE	A0A0R4INC4_DANRE	E9QCV2_DANRE	F1R9L2_DANRE	A0A2R8QEG3_DANRE	A0A2R8QLG6_DANRE	A0A2R8PVX9_DANRE	E7F8G7_DANRE	A0A286YBE9_DANRE	K7DYG8_DANRE	A0A2R8QB14_DANRE	A0A0R4IAS2_DANRE	A0A0G2KKE8_DANRE	I3ISA6_DANRE	F1QAU9_DANRE	A0A2R8RIJ1_DANRE	E9QFS3_DANRE	A0A0G2KQI8_DANRE	E7F4T0_DANRE
molecular_function	GO:0003950	NAD+ ADP-ribosyltransferase activity	29	90	0.322222	0.989224	0.0194699	1	1	Q499A8_DANRE	F2WZ37_DANRE	A0A0G2L4M0_DANRE	A0A2R8RKV4_DANRE	F8W3Q5_DANRE	A0A2R8Q1C4_DANRE	A0A2R8RU46_DANRE	A0A140LGI3_DANRE	Q5RHR0_DANRE	B0UYL3_DANRE	A0A2R8QBR7_DANRE	A0A2R8Q7N3_DANRE	A0A2R8PZD6_DANRE	A2BGH6_DANRE	A0A2R8Q5M8_DANRE	A0A2R8QFK5_DANRE	A0A0G2KLA5_DANRE	A0A2R8RKS1_DANRE	A0A2R8Q9E4_DANRE	A0A2R8Q7Y3_DANRE	F1QCL6_DANRE	A0A2R8RUY6_DANRE	A0A140LGQ8_DANRE	A0A0G2KFZ1_DANRE	F1QHW9_DANRE	A0A2R8RJW1_DANRE	A0A0R4IVH6_DANRE	A0A0R4IJ92_DANRE	A0A2R8QTX1_DANRE
biological_process	GO:0048514	blood vessel morphogenesis	28	90	0.311111	0.828834	0.194688	1	1	MIB1_DANRE	SESD1_DANRE	YAP1_DANRE	TBX6_DANRE	DLLC_DANRE	A0A2R8RU42_DANRE	Q30JB6_DANRE	Q8JFB0_DANRE	A0A2R8QHE8_DANRE	A0A0R4IE04_DANRE	A0A2R8QH43_DANRE	F1QYU0_DANRE	F1QXJ7_DANRE	F1Q711_DANRE	A0A2R8Q5A3_DANRE	F1QPD2_DANRE	A0A0R4II20_DANRE	A0A2R8QJ08_DANRE	F1QZF2_DANRE	A0A0G2L2B8_DANRE	E9QDB5_DANRE	F1R9C9_DANRE	F1QNG0_DANRE	F1QH44_DANRE	A0A2R8PYF1_DANRE	A0A2R8QE74_DANRE	A0A2R8Q5T2_DANRE	F1QS30_DANRE
cellular_component	GO:0000776	kinetochore	28	89	0.314607	0.970712	0.0456611	1	1	PHF2_DANRE	LRWD1_DANRE	ERC6L_DANRE	NDC80_DANRE	GPT11_DANRE	CLAP2_DANRE	Q6P0T6_DANRE	F1R0W9_DANRE	A8WHM7_DANRE	F6PC33_DANRE	F1R793_DANRE	A0A2R8QQ26_DANRE	A0A2R8QNP3_DANRE	A0A0R4IKV7_DANRE	A0A0R4IJ20_DANRE	E7F5B9_DANRE	A0A0R4I9U7_DANRE	A0A2R8RP20_DANRE	A0A286YA27_DANRE	E9QIT3_DANRE	A0A0R4IY38_DANRE	F1R253_DANRE	A0A0R4IW36_DANRE	A3KPT4_DANRE	E7FAC3_DANRE	A0A2R8QRK7_DANRE	B0UYN0_DANRE	A0A0R4IUQ7_DANRE
biological_process	GO:0001568	blood vessel development	28	115	0.243478	0.84837	0.172291	1	1	NPS4L_DANRE	MIB1_DANRE	FXC1B_DANRE	EPB4A_DANRE	NPS4A_DANRE	DZIP1_DANRE	Q1LWR7_DANRE	B3DKP1_DANRE	Q30JB6_DANRE	O93616_DANRE	Q8JFB0_DANRE	E7F8Q6_DANRE	A0A0R4ITJ9_DANRE	F1RE63_DANRE	Q1MT43_DANRE	X1WE29_DANRE	F1QCA7_DANRE	F1QBD0_DANRE	E7FBD0_DANRE	A0A2R8Q5A3_DANRE	A0A2R8QJW7_DANRE	F1RCR4_DANRE	E9QFX4_DANRE	A0A0R4II20_DANRE	E7FFY1_DANRE	F1QA07_DANRE	F1QH44_DANRE	A5WUN6_DANRE
molecular_function	GO:0004867	serine-type endopeptidase inhibitor activity	28	153	0.183007	0.134606	0.90471	1	1	E7FA40_DANRE	Q8JH29_DANRE	Q7T309_DANRE	F1R7D6_DANRE	X1WHI6_DANRE	E7FCH6_DANRE	F1REM9_DANRE	X1WH59_DANRE	F8W475_DANRE	F1Q4X5_DANRE	Q5RHF3_DANRE	A0A2R8QKV2_DANRE	A0A2R8RSM2_DANRE	A0A0R4IPG9_DANRE	Q08BG0_DANRE	C0H5W1_DANRE	F1QZN3_DANRE	A5PMH2_DANRE	F1QAB3_DANRE	F1QEV7_DANRE	F1Q924_DANRE	A0A0R4IJ40_DANRE	F1R074_DANRE	E9QEJ2_DANRE	A0A2R8RHN2_DANRE	X1WDY3_DANRE	F1QHG3_DANRE	E7F419_DANRE
molecular_function	GO:0004879	nuclear receptor activity	28	142	0.197183	0.262747	0.800321	1	1	N2F1A_DANRE	Q91430_DANRE	B3DKN2_DANRE	B3DGQ7_DANRE	Q4U3K9_DANRE	A4GT83_DANRE	Q6GMG3_DANRE	A0A0R4IC41_DANRE	A0A140LGV8_DANRE	A0A2R8QJZ8_DANRE	A0A0R4IMQ4_DANRE	Q1LV27_DANRE	B8A510_DANRE	F1QRU1_DANRE	A0A2R8Q5W6_DANRE	E9QI47_DANRE	A0A2R8Q1K0_DANRE	F1Q6P8_DANRE	F1QKV6_DANRE	A0A2R8PZ94_DANRE	F1R8N1_DANRE	B8JI61_DANRE	A0A2R8RP24_DANRE	B0V3V6_DANRE	A0A140LGM0_DANRE	E9QGY9_DANRE	F1RAU6_DANRE	X1WC37_DANRE
biological_process	GO:0007030	Golgi organization	28	93	0.301075	0.828623	0.229142	1	1	P4K2B_DANRE	GOGA5_DANRE	HACE1_DANRE	COG4_DANRE	P4K2A_DANRE	CLAP2_DANRE	A1IH00_DANRE	B0R066_DANRE	X1WCS2_DANRE	F8W5E0_DANRE	E7EY97_DANRE	B8A4N9_DANRE	F1RBH5_DANRE	F1QI20_DANRE	E7FE29_DANRE	F1R5F2_DANRE	F1QL68_DANRE	E7FFK0_DANRE	A0A2R8QKU0_DANRE	F8W281_DANRE	F1REE8_DANRE	E7F8Q5_DANRE	A0A0R4IJF7_DANRE	F1QN96_DANRE	A0A0R4J7R2_DANRE	E9QFK7_DANRE	E7F632_DANRE	A0A2R8QKJ2_DANRE
cellular_component	GO:0043025	neuronal cell body	28	83	0.337349	0.998466	0.00268923	1	0.685	L1CA2_DANRE	P4K2A_DANRE	A0A2R8QI85_DANRE	Q1LY45_DANRE	X1WDB0_DANRE	E7FFP8_DANRE	A0A140LH51_DANRE	E7FAT2_DANRE	F1Q7Y2_DANRE	B2ZZ14_DANRE	F1Q828_DANRE	E7FFY0_DANRE	A0A286Y962_DANRE	F1Q6C6_DANRE	A0A2R8QJ64_DANRE	E7F6Z8_DANRE	B0S6I3_DANRE	F1QW20_DANRE	F8W4G8_DANRE	A0A0R4INU5_DANRE	A0A0R4ISC3_DANRE	Q1LY44_DANRE	A0A0R4IC13_DANRE	A0A2R8RXK7_DANRE	F1QND4_DANRE	F1QYG6_DANRE	F1QTD1_DANRE	A0A140LGY7_DANRE
biological_process	GO:0016197	endosomal transport	28	59	0.474576	0.996943	0.00467684	1	1	K1109_DANRE	E7F6D8_DANRE	A5D6T0_DANRE	F1QIJ6_DANRE	U3JA74_DANRE	F1QV21_DANRE	A0A286YA11_DANRE	F1QPU4_DANRE	E7EY43_DANRE	A0A2R8QND0_DANRE	F1QF73_DANRE	A0A2R8RHR6_DANRE	F1R6Q2_DANRE	E7FBZ6_DANRE	E7FBC4_DANRE	X1WGI7_DANRE	A0A0G2L0S9_DANRE	A0A0R4IWJ1_DANRE	Q5VSI7_DANRE	E7F4L4_DANRE	F1QCM5_DANRE	F8W5C4_DANRE	A0A2R8QEF2_DANRE	A8E7E7_DANRE	X1WEW1_DANRE	A0A2R8RZ08_DANRE	U3JAA3_DANRE	A0A2R8QHH3_DANRE
molecular_function	GO:0005546	phosphatidylinositol-4,5-bisphosphate binding	28	86	0.325581	0.989863	0.0186239	1	1	AMER1_DANRE	Q1RLT7_DANRE	Q6IQP2_DANRE	F1Q6K8_DANRE	X1WEC4_DANRE	Q6AXI5_DANRE	A5PMM5_DANRE	A0A2R8Q3W8_DANRE	F1QVU3_DANRE	F1QKW9_DANRE	A0A2R8RPR6_DANRE	X1WE86_DANRE	A0A2R8QCX4_DANRE	F1QU62_DANRE	F1R3V3_DANRE	X1WHB3_DANRE	A0A0R4IT13_DANRE	F8W5M9_DANRE	A0A2R8Q0D6_DANRE	E9QJ38_DANRE	A0A286YBQ2_DANRE	A0A286YAZ9_DANRE	A0A2R8Q7K6_DANRE	A0A2R8QHW2_DANRE	U3JAV9_DANRE	A0A2R8QK11_DANRE	X1WDI1_DANRE	F8W4F2_DANRE
cellular_component	GO:0048788	cytoskeleton of presynaptic active zone	28	40	0.7	1	1.01054e-10	1	0	B7ZVS4_DANRE	F8W2K0_DANRE	A0A2R8Q9B4_DANRE	A0A2R8QC86_DANRE	A0A0A0MPT1_DANRE	A0A2R8Q102_DANRE	A0A0R4IGI4_DANRE	F1QFN1_DANRE	F1QC52_DANRE	A0A0R4IGY4_DANRE	A0A0R4IFV4_DANRE	A0A2R8QV60_DANRE	A0A0R4IL25_DANRE	F1QTK1_DANRE	A0A2R8Q4Y5_DANRE	A0A2R8RX97_DANRE	F1RCJ3_DANRE	F1R0Z6_DANRE	A0A2R8QAU5_DANRE	E9QHR1_DANRE	A0A0R4IEU4_DANRE	A0A2R8PWJ7_DANRE	F1QVX7_DANRE	A0A2R8QIB9_DANRE	A0A0A0MPV1_DANRE	A0A0R4IIE4_DANRE	F6NYB5_DANRE	A0A2R8QE86_DANRE
biological_process	GO:0032012	regulation of ARF protein signal transduction	28	61	0.459016	0.999947	0.000151581	1	0.229	A0A2R8Q8W8_DANRE	A0A2R8Q4F1_DANRE	A0A0G2L9G1_DANRE	A0A2R8QUT2_DANRE	E9QFJ3_DANRE	X1WBR0_DANRE	E9QF76_DANRE	E7FAY0_DANRE	A0A0G2KFX5_DANRE	A0A2R8Q8I6_DANRE	A0A0R4I9B8_DANRE	E7FCG1_DANRE	A0A2R8Q8B1_DANRE	A0A0R4IUT7_DANRE	A0A2R8Q504_DANRE	F1R952_DANRE	A0A2R8PZJ2_DANRE	A0A2R8PYH2_DANRE	B8JHV8_DANRE	A0A0R4ITB4_DANRE	E9QDV4_DANRE	A0A0G2L9N5_DANRE	F1QCJ4_DANRE	A0A2R8QGT6_DANRE	A0A2R8Q904_DANRE	E7EZE5_DANRE	A0A286Y9X1_DANRE	E7FGL2_DANRE
cellular_component	GO:0031941	filamentous actin	27	82	0.329268	0.992979	0.0134699	1	0.999	F1QGX8_DANRE	Q4ZGL5_DANRE	Q1L8E6_DANRE	Q4ZGL0_DANRE	F1QSU4_DANRE	Q4ZGK9_DANRE	F1R1G8_DANRE	A0A2R8QM62_DANRE	A0A2R8QJQ2_DANRE	E7EYZ7_DANRE	A0A2R8QLH8_DANRE	E7FG55_DANRE	E7FD42_DANRE	F1QU51_DANRE	A0A2R8QEC4_DANRE	A0A1D5NSS9_DANRE	A0A2R8Q829_DANRE	A0A2R8QED9_DANRE	A0A2R8QJ58_DANRE	A0A2R8RT75_DANRE	E7FDY6_DANRE	A0A2R8RUX3_DANRE	A0A0R4IVQ0_DANRE	F1QN07_DANRE	F1QT83_DANRE	A0A2R8QKB5_DANRE	X1WCN4_DANRE
cellular_component	GO:0005765	lysosomal membrane	27	151	0.178808	0.138347	0.901706	1	1	RN152_DANRE	GLMP_DANRE	S39AE_DANRE	WDR81_DANRE	VP33B_DANRE	KICS2_DANRE	BORC7_DANRE	A9C463_DANRE	E7FBN6_DANRE	F1QIC2_DANRE	A5D6T0_DANRE	F6NI22_DANRE	I3ISN1_DANRE	A0A140LGW7_DANRE	E7FBZ6_DANRE	E7F6N2_DANRE	B8A4V9_DANRE	F1R7J9_DANRE	B8A5M5_DANRE	A0A2R8Q6Y3_DANRE	A0A2R8QEF2_DANRE	E7EXM8_DANRE	A0A286YBB0_DANRE	F1Q9Q8_DANRE	A0A0R4IIW6_DANRE	A0A2R8QDG4_DANRE	A0A140LGR0_DANRE
biological_process	GO:0000381	regulation of alternative mRNA splicing, via spliceosome	27	132	0.204545	0.196738	0.856569	1	1	REST_DANRE	RFOX1_DANRE	CELF1_DANRE	CELF2_DANRE	FL2D_DANRE	A5YC70_DANRE	B8JIV1_DANRE	B7ZUV4_DANRE	A0A0R4IT73_DANRE	I3ISM5_DANRE	A0A2R8RLN8_DANRE	F1R9N7_DANRE	U3JA78_DANRE	A0A0G2KUM0_DANRE	I3IT07_DANRE	F8W4G8_DANRE	F1R9E9_DANRE	Q6NW62_DANRE	F1RCY7_DANRE	F1QAP4_DANRE	A0A2R8PZV7_DANRE	A0A2R8Q796_DANRE	A0A2R8RKQ8_DANRE	A0A2R8Q9N3_DANRE	A0A286YA75_DANRE	A0A2R8QN63_DANRE	F1R4L1_DANRE
molecular_function	GO:0001227	DNA-binding transcription repressor activity, RNA polymerase II-specific	27	92	0.293478	0.956058	0.070603	1	1	MYNN_DANRE	Q1LV62_DANRE	A2BG67_DANRE	Q7SYJ3_DANRE	A0A2R8QM99_DANRE	A9JT69_DANRE	Q08BX8_DANRE	F1RBA7_DANRE	H0WES6_DANRE	E9QDU4_DANRE	A0A0J9YJ67_DANRE	A8B8L1_DANRE	X1WE00_DANRE	F1QKK8_DANRE	H0WF56_DANRE	A0A2R8Q2Q0_DANRE	F1QA18_DANRE	F1QRT7_DANRE	F1RAC0_DANRE	F2Z4W3_DANRE	F1QFS4_DANRE	A5WWL2_DANRE	A0A2R8Q1R5_DANRE	Q5RIH3_DANRE	F1R9Q3_DANRE	F1RAU6_DANRE	F1Q4T2_DANRE
biological_process	GO:0006508	proteolysis	27	281	0.0960854	1.27994e-08	1	0	1	TPP1_DANRE	F1QJN9_DANRE	E7F123_DANRE	D3GE88_DANRE	Q6DBR1_DANRE	B5DDZ4_DANRE	Q6DGD8_DANRE	F1QXD8_DANRE	A0A0R4INQ5_DANRE	A0A2R8QBK0_DANRE	F8W5P2_DANRE	E9QJP7_DANRE	F1QKK8_DANRE	A0A2R8RKQ2_DANRE	A0A2R8QSL0_DANRE	E9QIR0_DANRE	A0A0R4ILB1_DANRE	F1RCV9_DANRE	A0A2R8QL18_DANRE	A0A2R8Q7C4_DANRE	Q6DG46_DANRE	F1QL16_DANRE	F1RAC0_DANRE	A0A2R8RZP1_DANRE	A0A0R4IIN9_DANRE	A0A2R8Q716_DANRE	F1QI24_DANRE
cellular_component	GO:0019898	extrinsic component of membrane	27	48	0.5625	0.979788	0.0266483	1	1	SC23A_DANRE	TRIO_DANRE	E7FF78_DANRE	Q1RLV0_DANRE	A0A2R8Q385_DANRE	A0A0R4IVJ3_DANRE	A0A0R4ISB6_DANRE	F8W5Y3_DANRE	E7F2V3_DANRE	F1QJI4_DANRE	A0A2R8RHL8_DANRE	A0A0R4IKT5_DANRE	A0A0R4IJ99_DANRE	F1R1Z4_DANRE	A0A2R8QD96_DANRE	E7F307_DANRE	E9QH42_DANRE	A0A2R8RJI5_DANRE	A0A2R8Q628_DANRE	A0A2R8Q2V3_DANRE	A0A2R8QHL0_DANRE	F1Q841_DANRE	A0A0R4IXX7_DANRE	E7FFM2_DANRE	F1QAQ5_DANRE	A0A2R8RXR6_DANRE	A0A0G2KF42_DANRE
biological_process	GO:0006914	autophagy	27	90	0.3	0.553714	0.495804	1	1	SMR8B_DANRE	BECN1_DANRE	UBP13_DANRE	TGFA1_DANRE	AMR1A_DANRE	AMR1B_DANRE	E7FBN6_DANRE	Q1L8A5_DANRE	B0UXN4_DANRE	A0A2R8RJG6_DANRE	F1QJI4_DANRE	A0A2R9YJF6_DANRE	G1K2R5_DANRE	A0A0N5E8A0_DANRE	A0A2R8Q5Z0_DANRE	A0A2R8RHI1_DANRE	A0A2R8Q578_DANRE	F1Q4W5_DANRE	F1QA02_DANRE	A0A0R4IAX0_DANRE	F1Q7V0_DANRE	A0A0R4IJF7_DANRE	F1QN96_DANRE	E7FFM2_DANRE	F1RAU6_DANRE	A0A2R8QKK4_DANRE	A0A2R8Q663_DANRE
cellular_component	GO:0030136	clathrin-coated vesicle	27	68	0.397059	0.989345	0.0171255	1	1	FCHO1_DANRE	F1QDL6_DANRE	Q6AXI5_DANRE	A0A0R4IKR8_DANRE	A0A0R4IZQ7_DANRE	F1QKW9_DANRE	X1WBM9_DANRE	X1WGL1_DANRE	F1R6L2_DANRE	F1R4R9_DANRE	A0A2R8QIJ0_DANRE	A0A0R4ITB0_DANRE	E7FGA0_DANRE	E9QCU8_DANRE	F1Q6Q6_DANRE	F8W5M9_DANRE	A0A0R4IS02_DANRE	A0A2R8QJ16_DANRE	A0A286YBQ2_DANRE	A0A286YAZ9_DANRE	A0A2R8Q6T3_DANRE	A0A2R8QHW2_DANRE	A0A2R8QK11_DANRE	A0A2R8QB02_DANRE	F8W4F2_DANRE	A0A286YAA1_DANRE	E9QFU5_DANRE
molecular_function	GO:0022857	transmembrane transporter activity	27	285	0.0947368	5.80891e-25	1	0	1	S47A1_DANRE	Q29RC8_DANRE	X1WEU3_DANRE	Q6DHM5_DANRE	F1RC11_DANRE	A0A0R4IZS1_DANRE	A0A286Y848_DANRE	X1WCW3_DANRE	A0A2R8Q000_DANRE	F1QX01_DANRE	B8A5J0_DANRE	F1Q7I7_DANRE	E7F467_DANRE	F1QL71_DANRE	E9QIK6_DANRE	A0A2R8Q8U7_DANRE	F6NGR0_DANRE	F1QMK7_DANRE	F1QZR1_DANRE	E7F3M2_DANRE	A0A0R4IY85_DANRE	Q5VSI5_DANRE	F1QIF7_DANRE	F8W5I1_DANRE	A0A2R8Q0U7_DANRE	E7F1Z8_DANRE	A0A2R8Q1J3_DANRE
cellular_component	GO:0016514	SWI/SNF complex	27	47	0.574468	1	1.24871e-07	1	0	Q802C8_DANRE	A0A2R8QPC0_DANRE	E7F8Y0_DANRE	E7EYW7_DANRE	A2BIK6_DANRE	A0A2R8RV42_DANRE	A0A0R4IR17_DANRE	E7FC48_DANRE	F6NTB4_DANRE	F6NVB1_DANRE	F8W4A9_DANRE	A0A0R4IJ25_DANRE	A0A2R8QHR6_DANRE	E7FFZ4_DANRE	F1QVI1_DANRE	A0A0R4IVD0_DANRE	F6P0Z6_DANRE	A0A0R4ISW4_DANRE	A0A2R8QFG7_DANRE	Q1MTE3_DANRE	Q5RGW7_DANRE	X1WFP9_DANRE	F6PBX5_DANRE	A0A0R4IKJ3_DANRE	F1QK55_DANRE	A0A2R8RJE4_DANRE	A0A0R4IDE0_DANRE
biological_process	GO:0005975	carbohydrate metabolic process	27	212	0.127358	2.73456e-21	1	0	1	MDH1B_DANRE	UEVLD_DANRE	YDJC_DANRE	B8A5X2_DANRE	A0A2R8Q930_DANRE	E9QDZ3_DANRE	E7F2B6_DANRE	E7FCP7_DANRE	F1QXQ8_DANRE	E7F6D4_DANRE	A0A2R8QER5_DANRE	A0A0R4IJ02_DANRE	F1RA25_DANRE	A2ARH2_DANRE	F1QHK0_DANRE	F1R1U0_DANRE	Q801E6_DANRE	A0A2R8QK71_DANRE	F1QEA9_DANRE	E7F701_DANRE	A0A0R4IEY0_DANRE	F1QJL0_DANRE	F1Q6Z9_DANRE	A0A2R8QK69_DANRE	F1REF7_DANRE	A0A2R9YJL1_DANRE	E7F7X8_DANRE
biological_process	GO:0030239	myofibril assembly	27	80	0.3375	0.879508	0.154457	1	1	NACA_DANRE	A0A0R4IJ71_DANRE	A0A2R8QQG7_DANRE	A0A2R8QMZ5_DANRE	X1WE86_DANRE	E9QFR8_DANRE	F1QZQ0_DANRE	F1QPI5_DANRE	A0A2R8QIE4_DANRE	Q1LXH4_DANRE	A0A2R8QR17_DANRE	F1R7N8_DANRE	E7F062_DANRE	A0A140LGX4_DANRE	Q1LXH6_DANRE	Q1LXH3_DANRE	E9QCV2_DANRE	F1Q5L7_DANRE	A0A0R4IRM3_DANRE	B0S758_DANRE	Q1LXH5_DANRE	G1K2X0_DANRE	A0A2R8QU09_DANRE	A0A2R8QBL5_DANRE	E7F4T0_DANRE	A0A2R8PZT6_DANRE	A0A140LFP0_DANRE
molecular_function	GO:0008013	beta-catenin binding	27	63	0.428571	0.999921	0.000220024	1	0.166	BCL9L_DANRE	MED12_DANRE	AMER1_DANRE	CHD8_DANRE	CTNA2_DANRE	F1R405_DANRE	A0A2R8QEP6_DANRE	A0A2R8QSE5_DANRE	B8A6A9_DANRE	F1Q548_DANRE	A0A0R4IBL3_DANRE	A0A0R4IB28_DANRE	F1Q7J8_DANRE	A0A0R4IBR4_DANRE	A0A288CG34_DANRE	A0A0A0MPN0_DANRE	X1WHB3_DANRE	A0A0R4IT13_DANRE	F8W4Z7_DANRE	Q9PVF8_DANRE	B8A6E8_DANRE	A0A286Y8G3_DANRE	E7FH24_DANRE	F8W4Z3_DANRE	E7F064_DANRE	A0A0R4IWH7_DANRE	A0A2R8Q3U7_DANRE
molecular_function	GO:0046332	SMAD binding	27	58	0.465517	0.999915	0.000215874	1	0.165	SKR1B_DANRE	Q7ZTZ6_DANRE	Q9YI02_DANRE	A0A0R4I9E1_DANRE	R4L6W8_DANRE	Q1RLX1_DANRE	Q8JFB0_DANRE	B3DJG0_DANRE	Q9W629_DANRE	A0A2R8RHW5_DANRE	A0A2R8Q8D8_DANRE	F1Q897_DANRE	A0A2R8QJF4_DANRE	Q5VSD9_DANRE	A0A2R8PV45_DANRE	A0A2R8RY00_DANRE	A0A2R8Q6R2_DANRE	A0A2R8QBW2_DANRE	A0A2R8QD15_DANRE	E7FH65_DANRE	Q1MTA8_DANRE	A0A2R8QNB7_DANRE	F1RC58_DANRE	A0A2R8QII5_DANRE	F1QH44_DANRE	A0A0R4IZG7_DANRE	F1Q4N0_DANRE
molecular_function	GO:0030374	nuclear receptor coactivator activity	27	42	0.642857	1	6.67481e-09	1	0	NCOA2_DANRE	E7F5J8_DANRE	E9QID1_DANRE	B8A6A5_DANRE	A0A2R8RXU8_DANRE	A0A0R4IGS9_DANRE	A0A2R9YJM7_DANRE	B0QZE8_DANRE	F1QMV7_DANRE	A0A2R8QL12_DANRE	A0A2R8RN05_DANRE	E7F4W0_DANRE	F1R869_DANRE	A0A0R4IHA5_DANRE	F1QV66_DANRE	A0A0R4IY58_DANRE	F6NQ00_DANRE	B8A6A6_DANRE	A0A0R4IZN8_DANRE	B7ZCQ7_DANRE	F6NH98_DANRE	A0A0R4IMU4_DANRE	F1R870_DANRE	E9QHG1_DANRE	Q5RIG3_DANRE	A0A0R4IW44_DANRE	E7FGT1_DANRE
cellular_component	GO:0031901	early endosome membrane	26	95	0.273684	0.928883	0.108268	1	1	S39AE_DANRE	WDR81_DANRE	LST2_DANRE	A0A2R8QM99_DANRE	F1Q546_DANRE	Q1MT71_DANRE	E7F6D8_DANRE	F1RB27_DANRE	F1QSH0_DANRE	A0A0R4IIM0_DANRE	A0A0R4IVI6_DANRE	A0A2R8QEJ6_DANRE	E9QGX8_DANRE	A0A140LGW7_DANRE	F1QA18_DANRE	F1RDJ8_DANRE	F1R7J9_DANRE	F1QV13_DANRE	A0A2R8Q6Y3_DANRE	A0A2R8Q420_DANRE	A0A286YBB0_DANRE	A0A2R9YJQ2_DANRE	E7FDM2_DANRE	A2BFT9_DANRE	A0A140LGR0_DANRE	E9QCS7_DANRE
biological_process	GO:0031101	fin regeneration	26	131	0.198473	0.154334	0.891034	1	1	FGR1A_DANRE	PO5F1_DANRE	SOX2_DANRE	YAP1_DANRE	WNT5B_DANRE	F1R5S1_DANRE	F1QFC0_DANRE	Q1L8A5_DANRE	O93616_DANRE	A0A2R8Q844_DANRE	Q1LWJ4_DANRE	F1QCA7_DANRE	B0UXY9_DANRE	E9QG91_DANRE	F1QP50_DANRE	B0S687_DANRE	A0A2R8QQ09_DANRE	A0A0R4IGP2_DANRE	X1WBC5_DANRE	X1WGQ8_DANRE	A0A286Y9P5_DANRE	F1QWV5_DANRE	A0A2R8QR15_DANRE	E9QC99_DANRE	A5WUN6_DANRE	A0A2R8QM53_DANRE
biological_process	GO:0002040	sprouting angiogenesis	26	151	0.172185	0.0267059	0.982444	1	1	MIB1_DANRE	NRP1A_DANRE	NR1AA_DANRE	THS7A_DANRE	VGFR3_DANRE	R213A_DANRE	R213B_DANRE	NARFL_DANRE	E2F8_DANRE	AGRA2_DANRE	Q52WY2_DANRE	B3DKP1_DANRE	A4FTT4_DANRE	Q1ECV9_DANRE	F1QBC0_DANRE	F8W338_DANRE	F1QBD0_DANRE	A0A2R8Q7E4_DANRE	A0A2R8PX85_DANRE	B0V0H4_DANRE	Q1LYS1_DANRE	Q5RH91_DANRE	B8A446_DANRE	A4FTT3_DANRE	Q5SPB5_DANRE	E7EZR4_DANRE
cellular_component	GO:0031902	late endosome membrane	26	95	0.273684	0.859113	0.197961	1	1	CHM2B_DANRE	KDISB_DANRE	S39AE_DANRE	WDR81_DANRE	VP33B_DANRE	VPS36_DANRE	A0JPF7_DANRE	F1Q546_DANRE	Q6P3K6_DANRE	Q6PBU2_DANRE	F1QIC2_DANRE	Q7SY45_DANRE	A5D6T0_DANRE	F1QSH0_DANRE	F1R5J4_DANRE	A0A2R8QPX7_DANRE	A0A140LGW7_DANRE	E9QH92_DANRE	F1R7J9_DANRE	E9QGR9_DANRE	B8A541_DANRE	A0A2R8Q6Y3_DANRE	A0A2R8QEF2_DANRE	A0A286YBB0_DANRE	F1QFF9_DANRE	A0A140LGR0_DANRE
molecular_function	GO:0003697	single-stranded DNA binding	26	106	0.245283	0.706883	0.372318	1	1	CTC1_DANRE	RPC3_DANRE	STN1_DANRE	B8JKC1_DANRE	Q504I6_DANRE	A0A2R8Q5B8_DANRE	F1QJS3_DANRE	F8W5U2_DANRE	A0A2R8QH82_DANRE	X1WGQ9_DANRE	F1QNQ7_DANRE	E7F5C4_DANRE	F1R5P3_DANRE	A0A2R8RWF4_DANRE	A0A2R8RYI2_DANRE	E7F8G9_DANRE	E7FEU2_DANRE	A5PN27_DANRE	A0A0R4IGT6_DANRE	E7F643_DANRE	E7FB68_DANRE	F1R1D8_DANRE	E9QIM3_DANRE	B8JL69_DANRE	A0A2R8RX28_DANRE	F8W2T2_DANRE
cellular_component	GO:0000781	chromosome, telomeric region	26	39	0.666667	1	2.21975e-08	1	0	LRWD1_DANRE	NSE1_DANRE	RNF8_DANRE	STN1_DANRE	TE2IP_DANRE	NBN_DANRE	Q504I6_DANRE	B0UY57_DANRE	A0A2R8PYB1_DANRE	A0A2R8RXV8_DANRE	A0A2R8QH82_DANRE	F1Q4W7_DANRE	E9QF00_DANRE	F1QE52_DANRE	A0A0J9YJ42_DANRE	A0A0R4IKV7_DANRE	A0A0R4IQG6_DANRE	A0A2R8QAW0_DANRE	F1R1D8_DANRE	A0A2R8Q220_DANRE	A8E7B7_DANRE	F8W2T2_DANRE	A0A2R8Q8M8_DANRE	A0A0R4IRZ2_DANRE	F1QTV5_DANRE	A0A2R8QPA8_DANRE
biological_process	GO:0042742	defense response to bacterium	26	146	0.178082	0.000846365	0.999549	0.601	1	CASPB_DANRE	R213A_DANRE	R213B_DANRE	A2BIN8_DANRE	Q1L8A5_DANRE	B0R0K7_DANRE	B3DFV8_DANRE	Q5RJ11_DANRE	A0A0R4IKJ5_DANRE	A0A286YAI0_DANRE	B0R063_DANRE	A0A0R4IJX9_DANRE	M9MMG2_DANRE	Q1MT80_DANRE	M9MMF8_DANRE	F1QB19_DANRE	A5GZR3_DANRE	F1QU19_DANRE	M9MMF9_DANRE	A0A2R8RNG3_DANRE	M9MMD8_DANRE	F6P1M3_DANRE	F1QML0_DANRE	A0A2R8Q323_DANRE	X1WGQ4_DANRE	M9MMF2_DANRE
biological_process	GO:0060070	canonical Wnt signaling pathway	26	144	0.180556	0.462019	0.58788	1	1	BCL9L_DANRE	WNT5B_DANRE	Q6NZT5_DANRE	F1R405_DANRE	Q9W6E3_DANRE	Q5TZ38_DANRE	B6V3E1_DANRE	Q9I9I2_DANRE	A0A2R8RZV0_DANRE	F1Q4W7_DANRE	E7F6V1_DANRE	F1Q7J8_DANRE	A0A286YAM6_DANRE	F8W2W1_DANRE	A0A2R8QE63_DANRE	A0A0A0MPN0_DANRE	F1R205_DANRE	F8W4Z7_DANRE	E7FC99_DANRE	A0A2R8QAW0_DANRE	A8E7B7_DANRE	F1QBS2_DANRE	F8W451_DANRE	F1RB76_DANRE	F1RAB5_DANRE	A0A2R8QPA8_DANRE
cellular_component	GO:0000118	histone deacetylase complex	26	55	0.472727	0.999995	1.19778e-05	1	0.006	ZN703_DANRE	E7F0R9_DANRE	E7FFR7_DANRE	A5D6S0_DANRE	Q1LYM8_DANRE	A0A1D5NSS3_DANRE	E7F750_DANRE	F6P8Y5_DANRE	F1QTE0_DANRE	Q1MT18_DANRE	E9QJJ9_DANRE	A0A2R8Q2M3_DANRE	A0A0R4IYD2_DANRE	A0A0R4IDZ5_DANRE	A0A1D5NSA1_DANRE	E7EYQ7_DANRE	A0A0R4IB58_DANRE	E7F3X7_DANRE	A0A2R8PVG8_DANRE	A0A2R8QTK3_DANRE	A0A2R8QJB8_DANRE	A0A2R8RUQ1_DANRE	F1RCE3_DANRE	A0A0R4ISI0_DANRE	E7F4A6_DANRE	A0A2R8QB31_DANRE
cellular_component	GO:0001726	ruffle	26	53	0.490566	0.999966	8.37362e-05	1	0.026	COBL_DANRE	A0A2R8QM99_DANRE	Q5RHU2_DANRE	Q6GMH1_DANRE	F1QVU3_DANRE	F1RB27_DANRE	A0A0R4IIA7_DANRE	A0A0R4IDZ8_DANRE	F1QUA3_DANRE	F1R4R9_DANRE	E7EXG2_DANRE	E7FGA0_DANRE	F1QA18_DANRE	E9QCU8_DANRE	A0A2R8QEM1_DANRE	Q5U7N6_DANRE	F1Q6Q6_DANRE	A0A0R4IID7_DANRE	F1QIB3_DANRE	A0A0R4IB32_DANRE	A0A2R8Q7K6_DANRE	A0A2R8Q5K8_DANRE	A0A0R4IKN2_DANRE	F1QB08_DANRE	A0A286YAA1_DANRE	E9QFU5_DANRE
biological_process	GO:0007528	neuromuscular junction development	26	78	0.333333	0.858861	0.194845	1	1	PZR3B_DANRE	A0A2R8S0F4_DANRE	A0A2R8Q2V5_DANRE	A0A0R4IK22_DANRE	F1QVH9_DANRE	F1R2Z6_DANRE	A0A0R4IR18_DANRE	F1R275_DANRE	F1QBQ0_DANRE	A0A2R8PYM0_DANRE	A0A2R8RPR2_DANRE	E9QF66_DANRE	A0A0R4IFE8_DANRE	A0A0J9YJ57_DANRE	A0A0R4IWG7_DANRE	A2CET3_DANRE	F1QB48_DANRE	H0WFE9_DANRE	A0A2R8Q6M8_DANRE	A0A0R4IXU9_DANRE	Q5RG05_DANRE	A0A2R8QRE1_DANRE	A0A2R8QCE0_DANRE	A0A0G2L109_DANRE	A0A2R8PZY5_DANRE	A0A2R8QGT9_DANRE
molecular_function	GO:0005200	structural constituent of cytoskeleton	26	67	0.38806	0.998784	0.00277545	1	0.931	Q6IQ78_DANRE	A0A2R8PZA9_DANRE	A0A0R4IJ71_DANRE	A5WV02_DANRE	A0A0R4IIA7_DANRE	A0A0R4IDZ8_DANRE	F1QUA3_DANRE	A0A0G2L1F5_DANRE	A0A2R8QKW7_DANRE	A0A2R8QR17_DANRE	F8W4C0_DANRE	A0A0R4INC4_DANRE	E9QCV2_DANRE	A0A140LGS5_DANRE	F1QXB0_DANRE	A0A2R8QEG3_DANRE	A0A2R8QLG6_DANRE	A0A2R8PVX9_DANRE	A0A2R8QEM1_DANRE	E7F8G7_DANRE	Q5U7N6_DANRE	A0A0R4IID7_DANRE	A0A286YBE9_DANRE	A0A2R8RIJ1_DANRE	A0A0R4IKN2_DANRE	E7F4T0_DANRE
molecular_function	GO:0070679	inositol 1,4,5 trisphosphate binding	26	62	0.419355	0.999841	0.00043148	1	0.255	E9QGJ3_DANRE	A0A2R8Q2R4_DANRE	F8W4B1_DANRE	A0A2R8RSY9_DANRE	A0A0R4ISF6_DANRE	A0A2R8Q567_DANRE	A0A2R8QV76_DANRE	A0A0R4IWZ0_DANRE	A0A2R8Q711_DANRE	A0A2R8QHB5_DANRE	A0A2R8QBV7_DANRE	A0A2R8Q9S2_DANRE	A0A2R8PWX1_DANRE	A0A0R4IH08_DANRE	A0A2R8QRV0_DANRE	E7FB06_DANRE	E7F4G8_DANRE	A0A2R8QAR1_DANRE	F1R1L5_DANRE	E9QIL1_DANRE	A0A2R8PYY5_DANRE	A0A2R8Q201_DANRE	A0A2R8QSM3_DANRE	A0A2R8RZ36_DANRE	A0A0R4IX04_DANRE	A0A2R8QJM5_DANRE
biological_process	GO:0032101	regulation of response to external stimulus	26	68	0.382353	0.404479	0.63986	1	1	A0A0R4IFP8_DANRE	B0S6D0_DANRE	A0A0R4IZU6_DANRE	L7NKH5_DANRE	Q6DH01_DANRE	Q1RLY9_DANRE	A0A2R8QP42_DANRE	F1QXE5_DANRE	F1RCQ5_DANRE	A0A0R4IBQ7_DANRE	F6NI62_DANRE	F1QN93_DANRE	A0A2R8QKA3_DANRE	E7FFT8_DANRE	F1QB64_DANRE	F1QKK8_DANRE	F1QPX5_DANRE	X1WGG7_DANRE	F1QSL8_DANRE	F1RAC0_DANRE	A0A2R8RMW2_DANRE	F8W5Z1_DANRE	A0A2R8RKP6_DANRE	A0A0R4IVS1_DANRE	F1QGI1_DANRE	A0A0R4INL6_DANRE
molecular_function	GO:0016491	oxidoreductase activity	25	265	0.0943396	2.92892e-30	1	0	1	GLYR1_DANRE	MCA2B_DANRE	GILT_DANRE	F1Q5R8_DANRE	A2BIN8_DANRE	F1R3G9_DANRE	M1ZMM0_DANRE	A0A0R4IHD6_DANRE	A0A0R4IVW4_DANRE	F1Q7F3_DANRE	F1R1R3_DANRE	A0A0R4I9J2_DANRE	F8W3A6_DANRE	A0A0R4IBQ7_DANRE	A0A0R4IMF9_DANRE	Q1LW04_DANRE	A0A2R8Q1T4_DANRE	X1WHF5_DANRE	F1QRA1_DANRE	Q5RHQ4_DANRE	Q1LVZ9_DANRE	F1QML0_DANRE	A0A0R4INL6_DANRE	E7F022_DANRE	F1QZZ7_DANRE
biological_process	GO:0048812	neuron projection morphogenesis	25	75	0.333333	1	3.4268e-08	1	0	NTF7_DANRE	Q6NZ01_DANRE	X1WGA8_DANRE	Q6GMH1_DANRE	F1Q6L5_DANRE	A0A0R4IEP9_DANRE	A0A0G2KF81_DANRE	A0A0R4IIN0_DANRE	B0UY93_DANRE	E7F885_DANRE	F1QR36_DANRE	A0A0R4IP53_DANRE	E7EXG2_DANRE	F1QW26_DANRE	A0A2R8QUH6_DANRE	X1WD79_DANRE	A0A2R8RPD7_DANRE	F1QIB3_DANRE	A0A0R4IJH5_DANRE	U3JAV8_DANRE	E7F192_DANRE	E9QBC8_DANRE	A0A0R4IVF8_DANRE	A0A0R4IWP5_DANRE	F1QGL1_DANRE
molecular_function	GO:0003678	DNA helicase activity	25	91	0.274725	0.99481	0.00883335	1	1	SUV3_DANRE	RUVB2_DANRE	ERC6L_DANRE	CHD8_DANRE	DDX11_DANRE	B8JKC1_DANRE	Q7M558_DANRE	Q7M559_DANRE	F1RBT2_DANRE	F1QNW3_DANRE	A0A2R8PZ65_DANRE	A0A2R8Q889_DANRE	A0A0R4IS12_DANRE	A0A0R4IN50_DANRE	X1WCW5_DANRE	F1R5P3_DANRE	A0A2R8RYI2_DANRE	F1QW70_DANRE	E7FH24_DANRE	E7F643_DANRE	A0A2R8QL47_DANRE	F1QYR7_DANRE	F1R685_DANRE	F1QWV5_DANRE	F1QGL1_DANRE
biological_process	GO:0006310	DNA recombination	25	62	0.403226	0.931202	0.0863579	1	1	SUV3_DANRE	RUVB2_DANRE	EXO1_DANRE	DCR1C_DANRE	ARP8_DANRE	I80DB_DANRE	Q6GML8_DANRE	Q7M558_DANRE	A0A0R4IHR6_DANRE	Q7M559_DANRE	X1WE48_DANRE	A0A0R4IFE4_DANRE	E7F8R0_DANRE	A0A2R8QQ92_DANRE	F1QNW3_DANRE	A0A2R8Q889_DANRE	A0A2R8QIK4_DANRE	A0A2R8QU46_DANRE	A0A0R4IT14_DANRE	A0A0R4IQG6_DANRE	F1QQM4_DANRE	F1QFT1_DANRE	A0A2R8QI59_DANRE	A0A2R8QA21_DANRE	A0A0R4ISA6_DANRE
biological_process	GO:0007422	peripheral nervous system development	25	55	0.454545	0.997667	0.00415927	1	1	DLX2A_DANRE	PAX2A_DANRE	NTF7_DANRE	Q6NYI3_DANRE	Q6NZ01_DANRE	Q90XD1_DANRE	Q7SX66_DANRE	A0A0R4ICW0_DANRE	A0A0R4IF59_DANRE	F1QR36_DANRE	A0A2R8RSI4_DANRE	A0A0R4IPG9_DANRE	Q6P975_DANRE	A0A0R4ISY7_DANRE	A0A0R4INK8_DANRE	F1R139_DANRE	A0A0R4IJ40_DANRE	A0A0R4IL48_DANRE	F1Q9Q9_DANRE	F1R074_DANRE	A0A2R8RHN2_DANRE	F1QUT5_DANRE	F1QUT4_DANRE	F8W405_DANRE	A0A2R8QRQ5_DANRE
biological_process	GO:0043473	pigmentation	25	67	0.373134	0.978944	0.0293264	1	1	TSN36_DANRE	Q6NYI3_DANRE	Q7ZUN6_DANRE	Q90XD1_DANRE	B0R0V8_DANRE	Q6PC35_DANRE	A0A2R8QI76_DANRE	F8W4N1_DANRE	F1QBU7_DANRE	A0A0A0MPG9_DANRE	E7EXF7_DANRE	A0A2R8RSI4_DANRE	A0A2R8QMK9_DANRE	F1QVU0_DANRE	A0A2R8QED1_DANRE	E7F2W2_DANRE	Q6P975_DANRE	A0A2R8Q396_DANRE	E9QET4_DANRE	G1K2X4_DANRE	F1QUT5_DANRE	A0A1D5NSN9_DANRE	F1QUT4_DANRE	A0A2R8QRQ5_DANRE	F1QGL1_DANRE
biological_process	GO:0006302	double-strand break repair	25	55	0.454545	0.99983	0.000280183	1	0.38	HPF1_DANRE	BABA1_DANRE	RNF8_DANRE	ABRX1_DANRE	ARP8_DANRE	Q499A8_DANRE	Q6GML8_DANRE	F1QVR2_DANRE	A0A0R4IFE4_DANRE	F1RDP8_DANRE	A0A2R8RXV8_DANRE	F8W5U2_DANRE	Q5RHR0_DANRE	A0A286Y9F7_DANRE	E9QF00_DANRE	A0A0R4IPZ0_DANRE	E7F5D0_DANRE	I3IRX0_DANRE	E7FEU2_DANRE	F8W411_DANRE	F1Q974_DANRE	F1QFT1_DANRE	F1Q4P4_DANRE	E9QBL7_DANRE	E7F4J7_DANRE
cellular_component	GO:0010494	cytoplasmic stress granule	25	54	0.462963	0.999983	5.70986e-05	1	0.022	PABPA_DANRE	YTHD2_DANRE	Q1LV60_DANRE	Q05AJ1_DANRE	Q6P124_DANRE	E7F1G8_DANRE	A0A0R4IVY5_DANRE	B8K0D5_DANRE	Q1MT54_DANRE	Q6TGY6_DANRE	F1Q4N1_DANRE	F1QA42_DANRE	E7FD91_DANRE	A8DZI0_DANRE	A0A2R8QKK6_DANRE	A0A2R8QB57_DANRE	A2CF31_DANRE	F1R0U5_DANRE	A0A2R8S0C3_DANRE	A0A2R8RND2_DANRE	A0A2R8PWZ8_DANRE	E7FCK6_DANRE	Q1LXV6_DANRE	A0A0R4IQ37_DANRE	A0A2R8QG13_DANRE
biological_process	GO:0055113	epiboly involved in gastrulation with mouth forming second	25	80	0.3125	0.875232	0.181354	1	1	PO5F1_DANRE	IKKA_DANRE	Q803J6_DANRE	E7F7H0_DANRE	R4L6W8_DANRE	E1ANH4_DANRE	F1QBZ9_DANRE	F1RE63_DANRE	A0A0R4IFF8_DANRE	A8WIP9_DANRE	A0A0R4IQ86_DANRE	A0A0R4IJR6_DANRE	F1QNG7_DANRE	A0A2R8Q566_DANRE	F1QT64_DANRE	A0A2R8Q2J0_DANRE	A0A0R4IZV0_DANRE	A0A2R8Q781_DANRE	A0A2R8PZ44_DANRE	F1Q5I0_DANRE	F1QA07_DANRE	A0A2R8RUD8_DANRE	A0A0R4IL00_DANRE	F1QRP2_DANRE	E9QBZ6_DANRE
biological_process	GO:0051056	regulation of small GTPase mediated signal transduction	25	53	0.471698	0.999999	1.0032e-06	1	0.006	E7F7Y0_DANRE	E7FE99_DANRE	A0A2R8Q8N1_DANRE	A0A0A0MPV6_DANRE	A0A286YB67_DANRE	A0A2R8RI29_DANRE	E7EYV1_DANRE	A0A2R8QKB1_DANRE	A0A140LH27_DANRE	F1R073_DANRE	A0A2R8PWT8_DANRE	X1WFB2_DANRE	X1WEX8_DANRE	A0A2R8QI48_DANRE	A0A0G2KHX4_DANRE	X1WG78_DANRE	A0A286Y892_DANRE	A0A2R8QSV2_DANRE	E7F5Q5_DANRE	A0A2R8PVU2_DANRE	F1QRR8_DANRE	Q5TYS4_DANRE	A0A2R8QC74_DANRE	A0A286Y9P2_DANRE	F1Q8E0_DANRE
biological_process	GO:0060027	convergent extension involved in gastrulation	24	103	0.23301	0.719741	0.350415	1	1	INVS_DANRE	TAB2_DANRE	DAAF1_DANRE	OFD1_DANRE	SCRIB_DANRE	WNT5B_DANRE	AGRA3_DANRE	F1QQ50_DANRE	F1QSX8_DANRE	B0S8I4_DANRE	F1R3T7_DANRE	A0A0R4IEP9_DANRE	E7EXH4_DANRE	B0UY93_DANRE	A0A2R8QF71_DANRE	F1Q6J9_DANRE	F1Q597_DANRE	A0A2R8RT44_DANRE	A0A2R8QB11_DANRE	E7F2F7_DANRE	F1QBF1_DANRE	F6PBE4_DANRE	E9QB24_DANRE	F1QGL3_DANRE
biological_process	GO:0014032	neural crest cell development	24	62	0.387097	0.926856	0.0948303	1	1	PEF1_DANRE	DLX2A_DANRE	LEO1_DANRE	KLH12_DANRE	MED12_DANRE	DICER_DANRE	Q6NYI3_DANRE	Q6DG95_DANRE	Q90XD1_DANRE	F1QDI6_DANRE	A0A0R4I9V4_DANRE	F1QP50_DANRE	B8JKQ1_DANRE	A0A2R8RSI4_DANRE	B0V2X4_DANRE	A0A2R8QQ09_DANRE	Q6P975_DANRE	A0A0R4IPG4_DANRE	G1K2X4_DANRE	F1QUT5_DANRE	A0A0R4I9J6_DANRE	F1QUT4_DANRE	E9QC99_DANRE	A0A2R8QRQ5_DANRE
biological_process	GO:0048675	axon extension	24	88	0.272727	0.85132	0.185979	1	1	PLXA3_DANRE	NRP1A_DANRE	THS7A_DANRE	MY9AB_DANRE	A8WG81_DANRE	F1QZQ3_DANRE	F1R376_DANRE	A0A2R8QRK0_DANRE	A0A2R8Q8Y3_DANRE	A8E7C6_DANRE	F1R0M4_DANRE	E7FEP0_DANRE	F1Q8G6_DANRE	A8DZ85_DANRE	F1Q7U0_DANRE	F1QFK4_DANRE	I3ITL5_DANRE	A0A2R8RX88_DANRE	A0A0H2UKL6_DANRE	A0A2R8QJ67_DANRE	A0A0R4IDV1_DANRE	A0A0R4IRZ9_DANRE	A0A0R4IR66_DANRE	F1R072_DANRE
molecular_function	GO:0003824	catalytic activity	24	95	0.252632	7.78995e-70	1	0	1	TEN4_DANRE	A2ARH3_DANRE	A0A2R8QUY1_DANRE	A0A0G2KJS8_DANRE	A0A0R4IN22_DANRE	A5PMC3_DANRE	A0A0R4ICV6_DANRE	E9QJQ5_DANRE	E7FDU0_DANRE	A0A2R8QER5_DANRE	E7F5G8_DANRE	A0A0R4IGJ8_DANRE	A0A2R8QLZ2_DANRE	A0A0R4ISL7_DANRE	Q29RF4_DANRE	A0A0G2L2B6_DANRE	F1QEA9_DANRE	E7FH52_DANRE	A0A286Y9C5_DANRE	F1RB36_DANRE	E7F6P0_DANRE	A0A2R8Q661_DANRE	A0A2R8QIZ5_DANRE	A0A2R8RZ80_DANRE
cellular_component	GO:0016592	mediator complex	24	82	0.292683	0.95719	0.0709039	1	1	MED29_DANRE	MED17_DANRE	MED24_DANRE	MED6_DANRE	MED25_DANRE	MED15_DANRE	MED12_DANRE	MD13L_DANRE	Q4V8V8_DANRE	A0A2R8QEP6_DANRE	E7FGV8_DANRE	A0A0R4IBL3_DANRE	R4GE16_DANRE	F1QFA9_DANRE	A0A2R8PWI0_DANRE	E7FCQ8_DANRE	A0A2R8Q4X2_DANRE	E9QD13_DANRE	A0A2R8QD69_DANRE	F1QKS1_DANRE	A0A2R8QJ08_DANRE	E9QDB5_DANRE	F1R9C9_DANRE	B8JM88_DANRE
molecular_function	GO:0017124	SH3 domain binding	24	78	0.307692	0.96957	0.0524486	1	1	F1QW63_DANRE	F1QN33_DANRE	Q1JPU9_DANRE	B0V218_DANRE	A0A0R4IWX6_DANRE	I3ISX7_DANRE	B0V219_DANRE	A0A286YAJ7_DANRE	F1Q5B6_DANRE	I3ITI8_DANRE	A0A0R4ILA7_DANRE	A0A2R8QEN6_DANRE	I3IRV8_DANRE	A0A2R8Q1F3_DANRE	A8E7L4_DANRE	F1QCK5_DANRE	I3IS72_DANRE	A0A2R8QUS0_DANRE	B0V217_DANRE	I3IS53_DANRE	F1Q742_DANRE	F1R187_DANRE	F1R6A7_DANRE	A0A2R8Q3V6_DANRE
cellular_component	GO:0055037	recycling endosome	24	97	0.247423	0.493239	0.586757	1	1	GP161_DANRE	RELCH_DANRE	SAC2_DANRE	RFIP3_DANRE	AMOL2_DANRE	F1R9Z0_DANRE	E7FDW4_DANRE	A0A2R8Q4Q1_DANRE	F6P7J8_DANRE	A0A2R8RMN7_DANRE	X1WBC3_DANRE	A0A0R4IC01_DANRE	F1R354_DANRE	A0A0G2KQ55_DANRE	E9QDA3_DANRE	H9GZD7_DANRE	E7FAM4_DANRE	A0A0R4IDG8_DANRE	A0A2R8Q4E3_DANRE	A0A2R8RRX6_DANRE	A0A0R4IZC8_DANRE	A0A2R8RML2_DANRE	A0A2R8QBA6_DANRE	E9QI21_DANRE
biological_process	GO:0070121	Kupffer's vesicle development	24	92	0.26087	0.726124	0.358849	1	1	CP131_DANRE	GPR22_DANRE	NPHP3_DANRE	BBS2_DANRE	RFX2_DANRE	NKD2_DANRE	TBXTA_DANRE	NKD1_DANRE	Q9W6U0_DANRE	F1REQ6_DANRE	E9QDJ5_DANRE	A0A2R8QMD0_DANRE	A0A2R8Q2U1_DANRE	F1Q6W8_DANRE	A0A2R8RI11_DANRE	A0A0R4IVI6_DANRE	E7EXH4_DANRE	B8JL25_DANRE	F1Q6J9_DANRE	F1QSP6_DANRE	A0A2R8QN32_DANRE	F6NUK4_DANRE	A2AR67_DANRE	F1QFD6_DANRE
biological_process	GO:0007346	regulation of mitotic cell cycle	24	381	0.0629921	3.79158e-08	1	0	1	B0S6T6_DANRE	B0S6T7_DANRE	F1QK52_DANRE	A2BG23_DANRE	X1WG33_DANRE	F1Q687_DANRE	X1WGR0_DANRE	F1R487_DANRE	F1R8Q9_DANRE	A0A2R8QNP6_DANRE	A0A2R8QC01_DANRE	B0S6U4_DANRE	A0A2R8PY68_DANRE	A0A2R8RKU6_DANRE	X1WCA9_DANRE	A0A2R8PZ44_DANRE	F1Q5I0_DANRE	A0A2R8QCK8_DANRE	F1R8K8_DANRE	A0A0H2UKA0_DANRE	A0A2R8RUD8_DANRE	E9QER9_DANRE	E9QEU8_DANRE	R4GEG6_DANRE
molecular_function	GO:0140359	ABC-type transporter activity	24	78	0.307692	0.983727	0.0277833	1	1	F1R7A8_DANRE	A0A0R4IV86_DANRE	A0A2R8QER7_DANRE	A2BFT1_DANRE	A0A2R8PW04_DANRE	F1R4U2_DANRE	A0A2R8QQQ1_DANRE	A0A0R4IUM5_DANRE	F1QC18_DANRE	F1QMZ9_DANRE	B8A446_DANRE	A0A2R8Q955_DANRE	E7F961_DANRE	A0A2R8QDG3_DANRE	F8W367_DANRE	E7EYG0_DANRE	F8W557_DANRE	B0V0U7_DANRE	A0A0R4ISK5_DANRE	F1Q5K6_DANRE	E7FAV3_DANRE	A0A0N4SU49_DANRE	A2BI69_DANRE	A0A140LGD8_DANRE
cellular_component	GO:0005891	voltage-gated calcium channel complex	24	99	0.242424	0.689376	0.397744	1	1	A0A2R8S0F4_DANRE	E7F278_DANRE	A0A0R4INP7_DANRE	A0A0R4IK22_DANRE	A8B6E8_DANRE	Q5RHB1_DANRE	X1WBF7_DANRE	F1RE82_DANRE	E9QF66_DANRE	A0A0R4IFE8_DANRE	E7F4T2_DANRE	A0A0R4IWG7_DANRE	Q5TZ68_DANRE	E7F9F6_DANRE	A0A2R8Q1A5_DANRE	A0A0R4IXU9_DANRE	A0A2R8QDT8_DANRE	U3JA71_DANRE	F1QCC4_DANRE	Q1MTF2_DANRE	F1RAM2_DANRE	E9QJF6_DANRE	Q5RHB2_DANRE	A0A0R4IRK8_DANRE
biological_process	GO:0014068	positive regulation of phosphatidylinositol 3-kinase signaling	24	41	0.585366	0.999999	2.40209e-06	1	0.007	TIE2_DANRE	A0A2R8Q0D8_DANRE	F1QKJ0_DANRE	E7FBB3_DANRE	A0A2R8RHW9_DANRE	A0A2R8Q844_DANRE	Q1LWJ4_DANRE	B8JLJ1_DANRE	F1QNX5_DANRE	F1Q7S3_DANRE	A0A0R4IGP2_DANRE	A0A2R8QRD6_DANRE	F1QB19_DANRE	A0A0R4ITE7_DANRE	A0A2R8RPQ4_DANRE	A0A0H2UKW5_DANRE	A0A286Y9P5_DANRE	F1QKB5_DANRE	F6P1M3_DANRE	A0A0R4IMU5_DANRE	A0A2R8PYF1_DANRE	A0A2R8QR15_DANRE	A0A2R8QM53_DANRE	F1QS30_DANRE
biological_process	GO:0051016	barbed-end actin filament capping	24	67	0.358209	0.988236	0.0223009	1	1	Q1RLT7_DANRE	F1Q6K8_DANRE	Q1LUP1_DANRE	X1WEC4_DANRE	A0A0R4IID9_DANRE	A0A2R8Q3W8_DANRE	F1QVU3_DANRE	A0A2R8QI45_DANRE	A0A2R8RL55_DANRE	A0A2R8QSN4_DANRE	A0A2R8RPR6_DANRE	X1WE86_DANRE	A0A2R8QCX4_DANRE	F1QU62_DANRE	A0A2R8QBF8_DANRE	F1R3V3_DANRE	F1RBS8_DANRE	A0A2R8Q0D6_DANRE	E9QJ38_DANRE	A0A2R8Q7K6_DANRE	F1QW07_DANRE	U3JAV9_DANRE	X1WDI1_DANRE	F1QTE3_DANRE
molecular_function	GO:0042626	ATPase-coupled transmembrane transporter activity	24	73	0.328767	0.115132	0.915211	1	1	F1R7A8_DANRE	A0A0R4IVE7_DANRE	A0A2R8PW04_DANRE	F1QSX6_DANRE	F1R4U2_DANRE	A0A2R8QQQ1_DANRE	A0A0R4IUM5_DANRE	E7F1E3_DANRE	E7EZD3_DANRE	F1QC18_DANRE	F1QMZ9_DANRE	B8A446_DANRE	A0A2R8Q955_DANRE	E7F961_DANRE	A0A2R8QDG3_DANRE	F8W367_DANRE	E7EYG0_DANRE	F6NLY2_DANRE	F8W557_DANRE	A0A0R4ISK5_DANRE	E7FAV3_DANRE	A0A0R4IC81_DANRE	A0A140LGD8_DANRE	A0A2R8RY78_DANRE
cellular_component	GO:0001725	stress fiber	23	95	0.242105	0.756456	0.325419	1	1	F1QGX8_DANRE	B3DJI0_DANRE	Q4ZGL5_DANRE	Q4ZGL0_DANRE	Q5RHJ3_DANRE	F1QSX8_DANRE	F1QSU4_DANRE	Q4ZGK9_DANRE	A0A0R4IER9_DANRE	F1R1G8_DANRE	A0A2R8QM62_DANRE	U3JB13_DANRE	B8A4X7_DANRE	F1QU51_DANRE	E7F6Y9_DANRE	A0A2R8Q829_DANRE	A0A2R8QJ58_DANRE	A0A0R4IS21_DANRE	F1QN07_DANRE	F1QT83_DANRE	A0A0R4IJJ4_DANRE	A0A1D5NSS7_DANRE	A0A2R8PVS7_DANRE
cellular_component	GO:0031201	SNARE complex	23	113	0.20354	0.401101	0.685161	1	1	Q6PHV0_DANRE	Q7ZUC1_DANRE	A0A2R8Q071_DANRE	Q7ZV18_DANRE	Q6IQK3_DANRE	Q567Y3_DANRE	Q7SY45_DANRE	A0A2R8RWS3_DANRE	A0A0R4IXG8_DANRE	A0A286Y9I3_DANRE	F1QIQ6_DANRE	E7F2P0_DANRE	A0A2R8RKH5_DANRE	X1WEE0_DANRE	F1QUF6_DANRE	A0A0R4IK07_DANRE	E7F0D3_DANRE	B8A541_DANRE	E9QC02_DANRE	Q1MTI1_DANRE	E9QEQ0_DANRE	A0A2R8QFW8_DANRE	F1QFP8_DANRE
biological_process	GO:0008380	RNA splicing	23	121	0.190083	9.8324e-05	0.999936	0.1	1	RFOX1_DANRE	ZN326_DANRE	FL2D_DANRE	ELAV4_DANRE	Q6P022_DANRE	E9QID1_DANRE	A0A0R4IT73_DANRE	A0A2R8RXU8_DANRE	A0A0R4IMP0_DANRE	A0A2R8RXA1_DANRE	I3ISM5_DANRE	A0A0R4IV43_DANRE	F1QT45_DANRE	U3JA78_DANRE	E7F8Y4_DANRE	I3IT07_DANRE	A0A0R4IAI1_DANRE	F1QA29_DANRE	F1QVD2_DANRE	E9QHG1_DANRE	A0A286YA75_DANRE	A0A2R8QN63_DANRE	E7FGT1_DANRE
biological_process	GO:0051260	protein homooligomerization	23	120	0.191667	0.0960371	0.933899	1	1	F6NJS4_DANRE	U3JA92_DANRE	A0A2R8RX84_DANRE	A0A2R8Q685_DANRE	A0A2R8Q554_DANRE	A0A286Y962_DANRE	B8A6H1_DANRE	A2CEM4_DANRE	A0A2R8QPN6_DANRE	E7FFQ6_DANRE	F6PA68_DANRE	A2CEM2_DANRE	X1WCE7_DANRE	E9QGX9_DANRE	A0A2R8QCL5_DANRE	E0R7P9_DANRE	A0A2R8QSA8_DANRE	A0A2R8QRP8_DANRE	F1QCW6_DANRE	A0A2R8Q9T9_DANRE	A0A2R8QLG2_DANRE	A0A2R8QUS8_DANRE	A0A2R8Q6L9_DANRE
cellular_component	GO:0000151	ubiquitin ligase complex	23	107	0.214953	0.0760604	0.940528	1	1	MIB1_DANRE	CRBN_DANRE	RNF8_DANRE	UBR3_DANRE	ARMC8_DANRE	Q7T355_DANRE	B0V225_DANRE	B0V226_DANRE	A8WIS6_DANRE	A0A0R4IUP8_DANRE	A0A2R8QEZ7_DANRE	Q1LUI6_DANRE	I3IRX0_DANRE	E7F6E1_DANRE	A0A0R4IBL4_DANRE	B0V224_DANRE	Q6P007_DANRE	A0A2R8QJK6_DANRE	F1Q974_DANRE	A0A2R8PZ38_DANRE	E7FEA3_DANRE	F1QHB4_DANRE	F1Q5A9_DANRE
biological_process	GO:0043123	positive regulation of I-kappaB kinase/NF-kappaB signaling	23	76	0.302632	0.895029	0.158564	1	1	TAB2_DANRE	BRD4_DANRE	TE2IP_DANRE	TRADD_DANRE	Q1LUQ2_DANRE	F1QHG7_DANRE	A4IFZ0_DANRE	Q1ECV9_DANRE	A0A0R4IKJ5_DANRE	X1WEU6_DANRE	A2CE85_DANRE	A0A0R4IPD6_DANRE	F1RB67_DANRE	E7FEY1_DANRE	F1R7S0_DANRE	F6NY94_DANRE	A0A0R4IP49_DANRE	A0A140LG29_DANRE	A0A2R8Q355_DANRE	F1QKB5_DANRE	A0A2R8Q8W9_DANRE	A0A0R4IMU5_DANRE	A0A0R4IQ44_DANRE
biological_process	GO:0016573	histone acetylation	23	46	0.5	0.961633	0.0595613	1	1	RUVB2_DANRE	TRRAP_DANRE	A2CG09_DANRE	A3KNA6_DANRE	A0A0R4IPE4_DANRE	E9QG94_DANRE	F1R259_DANRE	A0A286YBF2_DANRE	A0A0R4IUG1_DANRE	E7F2Q3_DANRE	A0A0R4IPF2_DANRE	A0A2R8Q4T2_DANRE	F1QH22_DANRE	A8HAK1_DANRE	E7F3M6_DANRE	A0A2R8QER3_DANRE	F1R0R1_DANRE	A0A0R4INM9_DANRE	A0A0R4IPF3_DANRE	A0A2R8Q521_DANRE	A0A0R4IVZ7_DANRE	X1WG57_DANRE	A0A0R4IY90_DANRE
molecular_function	GO:0005484	SNAP receptor activity	23	89	0.258427	0.823775	0.247052	1	1	Q6PHV0_DANRE	Q7ZUC1_DANRE	A0A2R8Q071_DANRE	Q7ZV18_DANRE	Q6IQK3_DANRE	Q567Y3_DANRE	Q7SY45_DANRE	A0A2R8RWS3_DANRE	A0A0R4IXG8_DANRE	A0A286Y9I3_DANRE	F1QIQ6_DANRE	E7F2P0_DANRE	A0A2R8RKH5_DANRE	X1WEE0_DANRE	F1QUF6_DANRE	A0A0R4IK07_DANRE	E7F0D3_DANRE	B8A541_DANRE	E9QC02_DANRE	Q1MTI1_DANRE	E9QEQ0_DANRE	A0A2R8QFW8_DANRE	F1QFP8_DANRE
biological_process	GO:0006906	vesicle fusion	23	87	0.264368	0.108256	0.924246	1	1	Q6PHV0_DANRE	Q7ZUC1_DANRE	A0A2R8Q071_DANRE	Q7ZV18_DANRE	Q6IQK3_DANRE	Q567Y3_DANRE	Q7SY45_DANRE	A0A2R8RWS3_DANRE	A0A0R4IXG8_DANRE	A0A286Y9I3_DANRE	F1QIQ6_DANRE	E7F2P0_DANRE	A0A2R8RKH5_DANRE	X1WEE0_DANRE	F1QUF6_DANRE	A0A0R4IK07_DANRE	E7F0D3_DANRE	B8A541_DANRE	E9QC02_DANRE	Q1MTI1_DANRE	E9QEQ0_DANRE	A0A2R8QFW8_DANRE	F1QFP8_DANRE
biological_process	GO:0006869	lipid transport	23	95	0.242105	0.297264	0.743474	1	1	F1QHR0_DANRE	A0A0R4IU48_DANRE	F1QJD1_DANRE	B3DHC5_DANRE	E7F980_DANRE	E9QBB8_DANRE	A0A0R4IDS0_DANRE	A0A0R4IUM5_DANRE	A0A2R8QLK0_DANRE	E9QCP7_DANRE	F1QCQ0_DANRE	A0A2R8S0I9_DANRE	F1QNG7_DANRE	E7F3X8_DANRE	A0A2R8Q2J0_DANRE	A0A0R4IZV0_DANRE	B8A446_DANRE	A0A2R8Q955_DANRE	E7FF26_DANRE	A0A0R4ISK5_DANRE	E9QJQ2_DANRE	F1Q8I3_DANRE	A0A2R8PY74_DANRE
biological_process	GO:0008285	negative regulation of cell population proliferation	23	92	0.25	0.0301845	0.981294	1	1	MNAR1_DANRE	IBP2B_DANRE	KANK2_DANRE	F1QDN4_DANRE	A5PF31_DANRE	A0A0R4ISE0_DANRE	Q9PUT7_DANRE	Q6DHF1_DANRE	A0A0R4INY5_DANRE	F1RAN5_DANRE	F6PDT3_DANRE	A0A0R4IT02_DANRE	F1Q782_DANRE	A2BFC8_DANRE	A0A2R8QQY4_DANRE	F8W4Z3_DANRE	E7F089_DANRE	E7FEJ0_DANRE	A0A2R8QQL1_DANRE	F1Q588_DANRE	A0A0R4IWH7_DANRE	E9QEP3_DANRE	A0A2R8QHE1_DANRE
biological_process	GO:0001654	eye development	23	134	0.171642	0.803903	0.219522	1	1	RN152_DANRE	CE290_DANRE	TATD1_DANRE	A5YC70_DANRE	Q8JIZ3_DANRE	Q9YHZ8_DANRE	Q9I9B7_DANRE	B8JIV1_DANRE	B7ZUV4_DANRE	A0A0R4IQL7_DANRE	B0UXI3_DANRE	F1QM25_DANRE	E9QFR8_DANRE	A0A2R8QFF2_DANRE	A0A0R4IB28_DANRE	A0A0R4IBR4_DANRE	F1QSY5_DANRE	A0A2R8Q8E3_DANRE	A0A0R4II20_DANRE	A0A2R8QBL5_DANRE	F1QT12_DANRE	F1QP24_DANRE	A0A0R4IUN1_DANRE
molecular_function	GO:0140326	ATPase-coupled intramembrane lipid transporter activity	23	71	0.323944	0.977821	0.0395587	1	1	A0A2R8QH67_DANRE	A8E5B0_DANRE	A0A2R8PW01_DANRE	X1WCP3_DANRE	A0A0R4IC01_DANRE	A0A2R8RKF4_DANRE	A0A2R8Q8E4_DANRE	Q08BV9_DANRE	E7FFK0_DANRE	A0A2R8Q3S1_DANRE	A0A2R8QM22_DANRE	A0A2R8QPQ6_DANRE	A0A2R8QEZ8_DANRE	A0A0R4IZC8_DANRE	A0A2R8Q447_DANRE	A0A2R8QNN7_DANRE	A0A2R8QJG7_DANRE	A0A2R8QFY2_DANRE	A0A286Y9U6_DANRE	E7FFH9_DANRE	A0A2R8RML2_DANRE	A0A2R8Q7A8_DANRE	A0A2R8QCK2_DANRE
cellular_component	GO:0005635	nuclear envelope	23	101	0.227723	0.99993	0.000119537	1	0.042	ARAID_DANRE	CHMP7_DANRE	ROGDI_DANRE	XPO2_DANRE	A2VD24_DANRE	Q6DKF7_DANRE	B0S6M2_DANRE	A0A286Y8U4_DANRE	F1R4S0_DANRE	E7F8C0_DANRE	E7FGG7_DANRE	E7EZV6_DANRE	F1R1L9_DANRE	Q5RGX4_DANRE	X1WHH7_DANRE	A0A2R8RYW6_DANRE	B0UXP3_DANRE	E7FB83_DANRE	A0A2R8Q9A2_DANRE	A0A0R4IF42_DANRE	F6P5X4_DANRE	A0A0R4IBE3_DANRE	F1QFI4_DANRE
molecular_function	GO:0020037	heme binding	23	261	0.0881226	5.90461e-09	1	0	1	C27C1_DANRE	NB5R4_DANRE	Q66I26_DANRE	A2BIN8_DANRE	B0UXS0_DANRE	A0A0R4IQ46_DANRE	A0A0R4IKF7_DANRE	E7FCW9_DANRE	E7F3G8_DANRE	F1QVF2_DANRE	F1Q9I2_DANRE	A0A0R4IB98_DANRE	A0A2R8RLY1_DANRE	A0A0R4IWN1_DANRE	F1RA02_DANRE	A0A2R8QJC5_DANRE	A0A0N4SU47_DANRE	F1QIA4_DANRE	F1QHW0_DANRE	Q1LUX9_DANRE	F1QNB0_DANRE	F1QML0_DANRE	A5WWJ0_DANRE
biological_process	GO:0072583	clathrin-dependent endocytosis	23	69	0.333333	0.980492	0.0327038	1	1	FCHO1_DANRE	AP2MA_DANRE	SAC2_DANRE	AP2MB_DANRE	Q6AXI5_DANRE	A0A0R4IA99_DANRE	A0A0R4IZQ7_DANRE	F1QKW9_DANRE	X1WBM9_DANRE	X1WGL1_DANRE	F1R6L2_DANRE	A0A2R8QIJ0_DANRE	K7DXX1_DANRE	F8W5M9_DANRE	A0A0R4IS02_DANRE	A0A2R8QJ16_DANRE	A0A286YBQ2_DANRE	A0A286YAZ9_DANRE	A0A2R8Q6T3_DANRE	A0A2R8QHW2_DANRE	A0A2R8QK11_DANRE	A0A2R8QB02_DANRE	F8W4F2_DANRE
molecular_function	GO:0004197	cysteine-type endopeptidase activity	23	115	0.2	0.0177002	0.988662	0.999	1	CASPB_DANRE	UBP33_DANRE	UBP16_DANRE	UBP13_DANRE	UBP37_DANRE	A2BF64_DANRE	F1QY38_DANRE	Q4FE55_DANRE	E7F4N9_DANRE	A0A2R8QB18_DANRE	A0A0R4IFT8_DANRE	A0A2R8RR17_DANRE	E7FDD8_DANRE	A0A2R8RHY7_DANRE	A0A0R4IB93_DANRE	E9QC12_DANRE	F1QNF4_DANRE	F1RBA1_DANRE	A0A0G2KYP4_DANRE	E7FD72_DANRE	A0A0R4IK18_DANRE	F1Q6K1_DANRE	E7EY58_DANRE
cellular_component	GO:0005902	microvillus	23	74	0.310811	0.95719	0.0709039	1	1	Q9DGG8_DANRE	F1Q8X9_DANRE	F1QVU3_DANRE	A0A0R4IFF8_DANRE	E7F106_DANRE	F1R4R9_DANRE	A0A0R4IQ86_DANRE	F1R527_DANRE	B0S6F2_DANRE	A0A0R4IJR6_DANRE	E7FDV0_DANRE	E7FGA0_DANRE	X1WBP3_DANRE	E9QCU8_DANRE	Q9PVF8_DANRE	F1Q6Q6_DANRE	A0A2R8Q7K6_DANRE	A0A0R4IL00_DANRE	A0A286Y9F5_DANRE	A0A1D5NS66_DANRE	A0A2R8QQJ0_DANRE	A0A286YAA1_DANRE	E9QFU5_DANRE
molecular_function	GO:0005125	cytokine activity	23	177	0.129944	3.04351e-08	1	0	1	WNT5B_DANRE	A9JRD6_DANRE	B8JJU1_DANRE	Q68IN2_DANRE	B8ZHI7_DANRE	B0UYR0_DANRE	Q9W6I6_DANRE	B6V3E1_DANRE	Q9I9I2_DANRE	A0A0G2KD61_DANRE	F1RA13_DANRE	F1R5Z7_DANRE	A0A2R8RLC3_DANRE	A0A0G2KD75_DANRE	F1QWZ9_DANRE	F1R205_DANRE	A0A0G2KI21_DANRE	A0A0G2KKG9_DANRE	F1QAD6_DANRE	F8W4A6_DANRE	F1RB76_DANRE	A0A0R4ICD7_DANRE	F1RAB5_DANRE
cellular_component	GO:0005604	basement membrane	23	90	0.255556	0.778266	0.288627	1	1	F1QVG7_DANRE	E7FET3_DANRE	F1QPJ1_DANRE	Q1MTD2_DANRE	A0A2R8RXG6_DANRE	X1WFR7_DANRE	F1R4B2_DANRE	F1R7R3_DANRE	A0A1D5NSB6_DANRE	X1WBC5_DANRE	A0A2R8Q880_DANRE	F1QVQ2_DANRE	M9MMB9_DANRE	X1WGQ8_DANRE	A0A0R4II20_DANRE	F1R9Y1_DANRE	Q5RI93_DANRE	E7F3V2_DANRE	F1Q9A6_DANRE	E7F6C7_DANRE	F1RAG3_DANRE	F1R9B8_DANRE	A0A2R8QTC7_DANRE
cellular_component	GO:0048786	presynaptic active zone	23	47	0.489362	1	1.4572e-16	1	0	F1R2P7_DANRE	A0A2R8QM84_DANRE	Q5TZ25_DANRE	A0A2R8Q2V5_DANRE	F1R2Z6_DANRE	A0A0R4IGV2_DANRE	B0S6H8_DANRE	F1QBQ0_DANRE	F1Q6T0_DANRE	A0A2R8PYM0_DANRE	A0A2R8Q9H7_DANRE	A0A2R8RPR2_DANRE	A0A0J9YJ57_DANRE	A2CET3_DANRE	F1QB48_DANRE	H0WFE9_DANRE	E9QDD5_DANRE	A0A286YB90_DANRE	A0A0R4IYA4_DANRE	Q5RG05_DANRE	A0A2R8RVS3_DANRE	A0A2R8RJQ6_DANRE	A0A140LGP1_DANRE
molecular_function	GO:0004896	cytokine receptor activity	23	89	0.258427	0.0320884	0.979474	1	1	A8WH88_DANRE	B3DI57_DANRE	A0FJH8_DANRE	B8JJU1_DANRE	A8WH93_DANRE	A0A0R4IE17_DANRE	A8WH92_DANRE	A8WH90_DANRE	A0A2R8QEU4_DANRE	F1RA13_DANRE	F1QMA9_DANRE	A0A0R4IJL4_DANRE	B0UXH1_DANRE	F1RBF1_DANRE	F1R904_DANRE	A0A2R8S073_DANRE	A8WH84_DANRE	F1QG81_DANRE	A0A2R8QHS3_DANRE	A0A0R4IQ60_DANRE	A0A0R4IAL7_DANRE	A0A0R4IAX8_DANRE	F1QUB9_DANRE
cellular_component	GO:0110165	cellular anatomical entity	23	64	0.359375	0.415918	0.636139	1	1	Q1L8B2_DANRE	A0A0R4I9E1_DANRE	Q5TZ33_DANRE	X1WG23_DANRE	B3DH22_DANRE	F1QCL0_DANRE	A0A0R4I9Q1_DANRE	F1QT20_DANRE	A0A2R8RY00_DANRE	X1WEZ4_DANRE	A0A2R8Q6R2_DANRE	A0A0R4IW71_DANRE	F1QRC6_DANRE	E7F8R6_DANRE	A0A0R4ICU1_DANRE	A0A2U3TW57_DANRE	A0A0R4IAB1_DANRE	A0A2R8QMC5_DANRE	F1Q924_DANRE	F1R6V5_DANRE	I3ISH9_DANRE	F1QTY6_DANRE	A0A0R4IRJ7_DANRE
molecular_function	GO:0042802	identical protein binding	22	132	0.166667	0.0972952	0.926444	1	1	PLXA3_DANRE	MDM2_DANRE	APOEB_DANRE	MIB1_DANRE	VGFR3_DANRE	DLLC_DANRE	A5JNG8_DANRE	A0A2R8QM99_DANRE	E7FDQ5_DANRE	B0R0S8_DANRE	Q6P0G5_DANRE	F1QN93_DANRE	A8WHX9_DANRE	A0A0R4ISQ1_DANRE	F1QIJ0_DANRE	F1QA18_DANRE	F1QZF9_DANRE	B7ZV58_DANRE	F1R4D3_DANRE	E7FH58_DANRE	E7F9I8_DANRE	A0A2R8RRT2_DANRE
cellular_component	GO:0015630	microtubule cytoskeleton	22	135	0.162963	1	3.19317e-20	1	0	A0A140LFX2_DANRE	A0A140LGA6_DANRE	A0A2R8Q7F4_DANRE	A0A0R4IPE8_DANRE	A0A2R8Q5N9_DANRE	A0A0G2KQA6_DANRE	E7F0A9_DANRE	E7F0V5_DANRE	B8A4G8_DANRE	F1QQI8_DANRE	E7F5Y9_DANRE	A0A140LH79_DANRE	A0A2R8RZE0_DANRE	A0A2R8QCB2_DANRE	X1WBH4_DANRE	A0A2R8QIV6_DANRE	A0A2R8Q0B7_DANRE	A0A140LH09_DANRE	A0A0R4IEP5_DANRE	E7F723_DANRE	E7FBA8_DANRE	A0A2R8PXK0_DANRE
biological_process	GO:0006470	protein dephosphorylation	22	130	0.169231	0.670655	0.385813	1	1	B6HY54_DANRE	Q7ZUQ2_DANRE	A2BE49_DANRE	Q7T2L8_DANRE	A0A1B1LZI1_DANRE	A3KP70_DANRE	X1WET2_DANRE	A0A0R4IA95_DANRE	A0A2R8QJG1_DANRE	F1R3T2_DANRE	E7F716_DANRE	F1QZX7_DANRE	A0A286Y832_DANRE	A0A0R4IJG0_DANRE	A0A2R8Q7H4_DANRE	B8JJP7_DANRE	E7EY20_DANRE	F1RBF2_DANRE	F1QTY8_DANRE	X1WFV4_DANRE	B8A5J4_DANRE	F1R933_DANRE
biological_process	GO:0010842	retina layer formation	22	72	0.305556	0.921806	0.123919	1	1	FOXN4_DANRE	TATD1_DANRE	POC1B_DANRE	F1R0W9_DANRE	A4QNW6_DANRE	Q568S1_DANRE	E7F1A2_DANRE	F1QTQ5_DANRE	A0A2R8PZW4_DANRE	E7F957_DANRE	F1QC95_DANRE	A0A0A0MPU2_DANRE	A0A0R4IXD9_DANRE	F1QM29_DANRE	F1QY51_DANRE	A0A2R8RP20_DANRE	M9MMA7_DANRE	A0A286YA27_DANRE	F1R721_DANRE	F1Q4Z1_DANRE	M9MMC0_DANRE	F1R221_DANRE
biological_process	GO:0035050	embryonic heart tube development	22	54	0.407407	0.974298	0.0353172	1	1	SPT6H_DANRE	TBX5A_DANRE	PAL1A_DANRE	TBX2_DANRE	Q6TNS1_DANRE	Q7SX66_DANRE	Q98873_DANRE	Q9W6I6_DANRE	E9QGZ3_DANRE	E9QIR1_DANRE	B8A5N9_DANRE	B8JKS6_DANRE	Q5TYX1_DANRE	F1Q5R9_DANRE	E7FA98_DANRE	A0A0R4IA41_DANRE	F1QZW1_DANRE	F8W4Z3_DANRE	A0A2R8PW40_DANRE	A0A0R4IWH7_DANRE	E9QGF5_DANRE	B0R122_DANRE
biological_process	GO:0007517	muscle organ development	22	58	0.37931	0.953007	0.0597171	1	1	H6ST2_DANRE	SPEG_DANRE	KMT5B_DANRE	CHSTB_DANRE	B0S6T1_DANRE	A5YC70_DANRE	Q6NYT8_DANRE	B8JIV1_DANRE	B7ZUV4_DANRE	F1R7V2_DANRE	F1QDK4_DANRE	X1WEZ4_DANRE	F1R0H8_DANRE	A0A0R4IXX0_DANRE	F1Q924_DANRE	A0A2R8Q309_DANRE	B8JI51_DANRE	A0A0R4IF13_DANRE	F1QXL0_DANRE	A0A2R8QMX9_DANRE	F1QXP9_DANRE	F1QC58_DANRE
cellular_component	GO:0043204	perikaryon	22	60	0.366667	0.997235	0.00628818	1	0.897	GGYF2_DANRE	ROGDI_DANRE	P4K2A_DANRE	DI2BA_DANRE	ELAV4_DANRE	Q6GMH1_DANRE	A0A2R8Q685_DANRE	A0A2R8QPN6_DANRE	A0A0R4IXJ1_DANRE	E7EXG2_DANRE	X1WCE7_DANRE	F1R133_DANRE	F1QGR7_DANRE	Q1LWZ5_DANRE	F1QIB3_DANRE	A0A2R8QSA8_DANRE	A0A2R8QRP8_DANRE	F1QCW6_DANRE	A0A2R8Q9T9_DANRE	A0A2R8QLG2_DANRE	A0A2R8QUS8_DANRE	A0A0R4IF42_DANRE
biological_process	GO:0000281	mitotic cytokinesis	22	74	0.297297	0.788621	0.29163	1	1	NUSAP_DANRE	E7F7H0_DANRE	A0A0R4IVY5_DANRE	Q90Y37_DANRE	E7EYJ6_DANRE	A0A286Y917_DANRE	Q1LX31_DANRE	A0A2R8Q548_DANRE	A0A288CG34_DANRE	A0A0R4IHT4_DANRE	A0A2R8QKR2_DANRE	E7F528_DANRE	A0A0A0MPH2_DANRE	B8A6E8_DANRE	A0A2R8Q781_DANRE	F8W4Z3_DANRE	A0A0R4IWH7_DANRE	Q7ZZB1_DANRE	A0A2R8Q3U7_DANRE	Q1LUB2_DANRE	F1QJH8_DANRE	A2BI20_DANRE
molecular_function	GO:0042800	histone methyltransferase activity (H3-K4 specific)	22	30	0.733333	1	3.96665e-09	1	0	SETD3_DANRE	SE1BA_DANRE	PRDM9_DANRE	E9QGQ0_DANRE	A0A2R8Q8I0_DANRE	F1R3T7_DANRE	F1QL52_DANRE	A0A2R8QF67_DANRE	A0A2R8RLD2_DANRE	F8W580_DANRE	A0A2R8QJZ9_DANRE	A0A2R8RNH4_DANRE	F1Q6L6_DANRE	F1R598_DANRE	A0A0R4IM21_DANRE	E7F2F7_DANRE	F1Q6F2_DANRE	A0A0R4IPF5_DANRE	F8W578_DANRE	F1R9N4_DANRE	A0A2R8PYC7_DANRE	A0A2R8Q4Z6_DANRE
biological_process	GO:0006954	inflammatory response	22	287	0.0766551	6.93873e-11	1	0	1	CASPB_DANRE	C3AR_DANRE	A9ZPD8_DANRE	A2BIN8_DANRE	Q1L8A5_DANRE	Q5RJ11_DANRE	Q6DGE6_DANRE	F1QY61_DANRE	A0A2R8QN98_DANRE	E7F6J8_DANRE	A0A0R4IW15_DANRE	F1QLQ2_DANRE	F1QY64_DANRE	Q1MT80_DANRE	X1WBP3_DANRE	A0A0R4IGC9_DANRE	A0A2R8QF61_DANRE	B8A691_DANRE	F1QML0_DANRE	A0A2R8QA47_DANRE	A0A2R8QLW9_DANRE	F1QRX5_DANRE
molecular_function	GO:0005178	integrin binding	22	96	0.229167	0.611589	0.484107	1	1	B0S6K6_DANRE	B3DIP9_DANRE	B0S6K5_DANRE	F1QM84_DANRE	F1QSR3_DANRE	A0A0R4IIA7_DANRE	A0A2R8Q0B5_DANRE	A0A2R8QBL2_DANRE	A0A0R4IDZ8_DANRE	A0A2R8PXH2_DANRE	A0A2R8QGP7_DANRE	F1QUA3_DANRE	A2CEW3_DANRE	A0A2R8QEM1_DANRE	Q5U7N6_DANRE	A0A0R4IID7_DANRE	A0A0G2KQ30_DANRE	A0A0R4IDI3_DANRE	F1RA51_DANRE	A0A2R8QMV5_DANRE	F1REL9_DANRE	A0A0R4IKN2_DANRE
biological_process	GO:0050767	regulation of neurogenesis	22	51	0.431373	0.999996	6.98158e-06	1	0.019	BTB6A_DANRE	PNX_DANRE	YTHD2_DANRE	DICER_DANRE	B0S6T1_DANRE	Q6PBX3_DANRE	B0V3D1_DANRE	Q6VUB8_DANRE	Q6W4T8_DANRE	F1QU78_DANRE	F1QGN3_DANRE	B0V3D3_DANRE	A0A0R4IC33_DANRE	B0V3D2_DANRE	F1R0S9_DANRE	Q90466_DANRE	Q6P105_DANRE	F1QSH8_DANRE	B0V3D4_DANRE	F1QAC4_DANRE	A0A2R8Q6M1_DANRE	A0A2R8QMX9_DANRE
cellular_component	GO:0016342	catenin complex	22	63	0.349206	0.994387	0.0118851	1	0.998	CTNA2_DANRE	F1RD80_DANRE	F1QTT3_DANRE	A0A2R8Q5S4_DANRE	F1QUV8_DANRE	E7F374_DANRE	A0A0R4IM30_DANRE	F8W4M8_DANRE	A0A2R8QDB8_DANRE	A0A0R4IFF8_DANRE	A0A0R4IQ86_DANRE	A0A0R4IJR6_DANRE	A0A0R4IRW1_DANRE	E7FC11_DANRE	E7F1W3_DANRE	A0A0R4IY18_DANRE	Q9PVF8_DANRE	A0A2R8QFR7_DANRE	E7FC99_DANRE	E7F064_DANRE	A0A0R4IL00_DANRE	A0A0R4IRF9_DANRE
biological_process	GO:0043410	positive regulation of MAPK cascade	22	64	0.34375	0.0099278	0.993405	1	1	TIE2_DANRE	F1R5S1_DANRE	A0A0R4IEK8_DANRE	F1QKJ0_DANRE	A0A2R8Q844_DANRE	Q1LWJ4_DANRE	B8JLJ1_DANRE	F8W3R9_DANRE	F1QNX5_DANRE	E7FBZ6_DANRE	F1Q7S3_DANRE	A0A0R4IGP2_DANRE	F1QB19_DANRE	Q1LX18_DANRE	A0A0R4ITE7_DANRE	A0A0H2UKW5_DANRE	A0A286Y9P5_DANRE	F1QKB5_DANRE	F6P1M3_DANRE	A0A0R4IMU5_DANRE	A0A2R8QR15_DANRE	A0A2R8QM53_DANRE
biological_process	GO:0001946	lymphangiogenesis	22	58	0.37931	0.975898	0.043479	1	1	WNT5B_DANRE	VGFR3_DANRE	E2F8_DANRE	Q91430_DANRE	B3DGQ7_DANRE	Q30JB6_DANRE	D2DHG1_DANRE	O93616_DANRE	F6NRL9_DANRE	F1QCA7_DANRE	X1WBR0_DANRE	A0A2R8Q7E4_DANRE	F1RCH4_DANRE	A0A0R4IRB6_DANRE	A0A140LH27_DANRE	F1Q6P8_DANRE	A0A2R8Q5A3_DANRE	U3JAI2_DANRE	U3JAV8_DANRE	Q5SPB5_DANRE	E7EZE5_DANRE	A5WUN6_DANRE
cellular_component	GO:0072686	mitotic spindle	22	45	0.488889	0.994465	0.01134	1	0.996	NUSAP_DANRE	CC14A_DANRE	TPC14_DANRE	IRAG2_DANRE	CLAP2_DANRE	E7F7H0_DANRE	Q7ZVN3_DANRE	Q08CD9_DANRE	D2XZ47_DANRE	A8WHM7_DANRE	F1RB66_DANRE	E7FDD8_DANRE	A0A2R8Q1K1_DANRE	E9QBN1_DANRE	B8A4V4_DANRE	A0A0R4IWS2_DANRE	E9QE51_DANRE	A0A2R8Q781_DANRE	F1R253_DANRE	F8W600_DANRE	F8W5R0_DANRE	F8W2B2_DANRE
biological_process	GO:0018107	peptidyl-threonine phosphorylation	22	67	0.328358	0.949157	0.0850765	1	1	A0A0R4IVY5_DANRE	A9ZMG5_DANRE	Q1LUZ7_DANRE	D1L3Y5_DANRE	Q90Y37_DANRE	Q5TZ42_DANRE	B3IWJ8_DANRE	E7F551_DANRE	A0A0R4INQ1_DANRE	E7FGD8_DANRE	A0A2R8QST5_DANRE	A0A0R4IHT4_DANRE	Q5TZ37_DANRE	Q1MTA8_DANRE	F1QN82_DANRE	A0A2R8QNB7_DANRE	E7F544_DANRE	A0A0R4II39_DANRE	E9QFT3_DANRE	E7F1L8_DANRE	A0A2R8RNU9_DANRE	F1Q4N0_DANRE
biological_process	GO:0007274	neuromuscular synaptic transmission	22	37	0.594595	0.999999	4.41685e-06	1	0.015	B7ZVS4_DANRE	F8W2K0_DANRE	A0A2R8Q4Q1_DANRE	A0A0R4IFS3_DANRE	A0A2R8PW69_DANRE	A0A0A0MPT1_DANRE	A0A2R8Q102_DANRE	F1QFN1_DANRE	A0A0R4IGY4_DANRE	A0A2R8RMN7_DANRE	X1WBC3_DANRE	A0A2R8Q6J8_DANRE	A0A0R4IFV4_DANRE	A0A0R4IL25_DANRE	F1RCS2_DANRE	A0A2R8QCF0_DANRE	A0A2R8Q3W4_DANRE	A0A2R8Q7I4_DANRE	A0A0R4IEU4_DANRE	A0A2R8Q4E3_DANRE	Q7SZY5_DANRE	A0A0A0MPV1_DANRE
biological_process	GO:0048278	vesicle docking	22	43	0.511628	0.998869	0.0023129	1	0.98	CEP83_DANRE	Q6PHV0_DANRE	A0A2R8Q071_DANRE	Q7ZV18_DANRE	Q567Y3_DANRE	A0A2R8RWS3_DANRE	A0A0R4IXG8_DANRE	A0A286Y9I3_DANRE	F1QIQ6_DANRE	E7F2P0_DANRE	A0A2R8RKH5_DANRE	A0A0R4IBC5_DANRE	X1WEE0_DANRE	F1QUF6_DANRE	A0A0R4IK07_DANRE	E7F0D3_DANRE	A0A0R4IVY9_DANRE	E9QC02_DANRE	Q1MTI1_DANRE	E9QEQ0_DANRE	A0A2R8QFW8_DANRE	F1QFP8_DANRE
cellular_component	GO:0005942	phosphatidylinositol 3-kinase complex	22	54	0.407407	0.999988	3.67914e-05	1	0.014	B0EVP9_DANRE	A0A2R8Q2X0_DANRE	A0A0R4IFZ8_DANRE	B3DHG9_DANRE	A0A0R4IUJ2_DANRE	F1QAD7_DANRE	B0EVP5_DANRE	A0A2R8Q7V8_DANRE	F1QCV5_DANRE	F1QB84_DANRE	A0A2R8Q031_DANRE	F1QI15_DANRE	A0A2R8QSP1_DANRE	A0A0G2L6J0_DANRE	A0A0R4IYS3_DANRE	L0N8W2_DANRE	Q7ZVW3_DANRE	Q1L913_DANRE	F1RB17_DANRE	F6NVP6_DANRE	F6NMW9_DANRE	A0A2R8QIU7_DANRE
biological_process	GO:0006952	defense response	22	43	0.511628	2.27402e-12	1	0	1	A4QNT9_DANRE	Q4V9B2_DANRE	Q8AW20_DANRE	O93599_DANRE	Q6NV46_DANRE	A0A1S6L757_DANRE	A0A0R4IGF2_DANRE	A0A2R8S045_DANRE	F1QVF2_DANRE	B0S790_DANRE	F8W3X1_DANRE	A0A2R8RWD9_DANRE	E7FBV9_DANRE	A0A2R8RLY1_DANRE	A0A0R4IWN1_DANRE	Q68SP3_DANRE	A0A286Y943_DANRE	A0A2R8QJC5_DANRE	F1QWX2_DANRE	A0A2R8QTS6_DANRE	A0A2R8Q947_DANRE	F1QV52_DANRE
cellular_component	GO:0008076	voltage-gated potassium channel complex	22	110	0.2	0.368973	0.71579	1	1	A0A2R8Q685_DANRE	A0A286Y962_DANRE	A0A0R4ISS8_DANRE	A0A2R8QPN6_DANRE	F1RB62_DANRE	A0A2R8RUK8_DANRE	E7FFQ6_DANRE	X1WCE7_DANRE	A0A2R8QJR0_DANRE	E7FBM0_DANRE	A0A2R8Q2R0_DANRE	E0R7P9_DANRE	A0A2R8QAI6_DANRE	A0A2R8QSA8_DANRE	A0A0R4ISU8_DANRE	A0A2R8QRP8_DANRE	A0A2R8QD79_DANRE	F1QCW6_DANRE	A0A2R8Q9T9_DANRE	E7FGL7_DANRE	A0A2R8QLG2_DANRE	A0A2R8QUS8_DANRE
molecular_function	GO:0071949	FAD binding	21	82	0.256098	0.803879	0.274669	1	1	MCA3B_DANRE	MCA3A_DANRE	MICA1_DANRE	MCA2B_DANRE	D2HDH_DANRE	F1Q5R8_DANRE	A4QN37_DANRE	Q7ZU53_DANRE	M1ZMM0_DANRE	A0A2U3TW42_DANRE	F1R1R3_DANRE	F1R1X1_DANRE	T1ECS7_DANRE	F1R3V9_DANRE	Q1LW04_DANRE	A0A2R8Q1T4_DANRE	H9KUX2_DANRE	A0A2U3TW39_DANRE	Q1LVZ9_DANRE	F1R2R7_DANRE	E7F022_DANRE
biological_process	GO:0060319	primitive erythrocyte differentiation	21	40	0.525	0.999996	1.7822e-05	1	0.036	PHF8_DANRE	KLF1_DANRE	F1RBA7_DANRE	Q6DHD0_DANRE	E7F958_DANRE	B0R0X6_DANRE	F6NXN2_DANRE	E9QG91_DANRE	F1RDZ7_DANRE	F6NPZ8_DANRE	A0A2R8QBF3_DANRE	F1Q6M9_DANRE	A0A286YAQ6_DANRE	A0A2R8QUN0_DANRE	F1QPD8_DANRE	A0A0R4IDU4_DANRE	Q5FBC1_DANRE	A0A2R8RZ82_DANRE	A0A286Y8T8_DANRE	X1WE89_DANRE	F1QGL1_DANRE
molecular_function	GO:0017154	semaphorin receptor activity	21	36	0.583333	0.999999	3.23397e-06	1	0.003	PLXA3_DANRE	NRP1A_DANRE	A0A0R4IFP8_DANRE	B0S6D0_DANRE	Q1RLY9_DANRE	F1QBC0_DANRE	F1QZQ3_DANRE	F1QXE5_DANRE	F1QN93_DANRE	A0A2R8PX85_DANRE	E7FGY1_DANRE	A0A2R8Q3J7_DANRE	Q5RH91_DANRE	F1Q7U0_DANRE	F1Q6L2_DANRE	A0A2R8RMW2_DANRE	F1R7J5_DANRE	B0V1S6_DANRE	A0A0R4IRZ9_DANRE	A0A0A0MPG5_DANRE	A0A140LGG1_DANRE
cellular_component	GO:0016323	basolateral plasma membrane	21	117	0.179487	0.182281	0.87318	1	1	RHBG_DANRE	S39AE_DANRE	SCRIB_DANRE	DLG1_DANRE	ALPK2_DANRE	B7ZVK8_DANRE	A0A0R4IZS1_DANRE	E7EYJ7_DANRE	R4GDY5_DANRE	F1RDZ7_DANRE	E7EZZ0_DANRE	X1WBP3_DANRE	E7F9G8_DANRE	F1QPD8_DANRE	F1QPF0_DANRE	F6NGR0_DANRE	X1WE89_DANRE	A0A0R4IEU0_DANRE	A0A0R4IC81_DANRE	X1WCT5_DANRE	A0A2R8RY78_DANRE
biological_process	GO:0048484	enteric nervous system development	21	71	0.295775	0.890052	0.16815	1	1	NCLN_DANRE	PHR4A_DANRE	MED24_DANRE	PHR4B_DANRE	CHD8_DANRE	F1QXB3_DANRE	Q90XD1_DANRE	A0A2R8QKN2_DANRE	O57416_DANRE	F1R376_DANRE	A8E7C6_DANRE	A0A2R8QNY0_DANRE	A0A2R8RXM9_DANRE	E9QIS0_DANRE	A0A0R4IAQ8_DANRE	F1QGW9_DANRE	F1R4A0_DANRE	B0S6A6_DANRE	E7F981_DANRE	F6PE50_DANRE	E9QGM4_DANRE
molecular_function	GO:0005044	scavenger receptor activity	21	93	0.225806	0.581799	0.516691	1	1	SCAR5_DANRE	A9JRH6_DANRE	A0A286YAI0_DANRE	A0A0R4IQE0_DANRE	F1QTA3_DANRE	A0A0R4IA13_DANRE	A0A0A0MPS1_DANRE	X1WHP0_DANRE	F1R240_DANRE	F1QKL3_DANRE	H0WF83_DANRE	A5PF55_DANRE	A0A2R8QFD1_DANRE	H0WEV1_DANRE	F1QX88_DANRE	F1QHZ9_DANRE	F1R2Y3_DANRE	F1QU19_DANRE	A0A0R4ISR9_DANRE	F1Q8H3_DANRE	E7EYC5_DANRE
biological_process	GO:0048843	negative regulation of axon extension involved in axon guidance	21	77	0.272727	0.79141	0.290445	1	1	SE3AB_DANRE	SEM4E_DANRE	SE3AA_DANRE	E7F898_DANRE	F1QBD4_DANRE	A0A2R8Q0R5_DANRE	A0A286Y9T7_DANRE	A0A2R8QAH3_DANRE	F1QU86_DANRE	E7FEP0_DANRE	F1QGW9_DANRE	A0A0R4IDW5_DANRE	Q1LYS1_DANRE	B8JMB1_DANRE	X1WF24_DANRE	A0A0G2KQ30_DANRE	F1RB05_DANRE	F1R7Z2_DANRE	F1R501_DANRE	A0A286YAK7_DANRE	A0A0R4IR66_DANRE
biological_process	GO:0060216	definitive hemopoiesis	21	84	0.25	0.639931	0.458102	1	1	NPS4L_DANRE	MIB1_DANRE	SMYD5_DANRE	HXD4A_DANRE	NACA_DANRE	Q802C8_DANRE	F1R135_DANRE	Q9I9B7_DANRE	Q08CD9_DANRE	D2XZ47_DANRE	A0A0J9YJ67_DANRE	X1WFM6_DANRE	E7F445_DANRE	A0A2R8Q1K1_DANRE	A0A0R4IX50_DANRE	F1R904_DANRE	A0A2R8Q8E3_DANRE	F1QD30_DANRE	A0A2R8RVN3_DANRE	F1QUN0_DANRE	F1QP24_DANRE
cellular_component	GO:0005764	lysosome	21	199	0.105528	1.49049e-05	0.999992	0.001	1	TPP1_DANRE	RN152_DANRE	GALC_DANRE	GLMP_DANRE	VP33B_DANRE	GILT_DANRE	A9JRX6_DANRE	B0S5J2_DANRE	A2BF64_DANRE	E7FBN6_DANRE	F1Q546_DANRE	Q1L9E4_DANRE	F1QSH0_DANRE	E7FBZ6_DANRE	F1RBH4_DANRE	Q8AWD9_DANRE	B8JK19_DANRE	F1QTT0_DANRE	F8W261_DANRE	A0A0R4IK18_DANRE	A0A2R8RWY9_DANRE
biological_process	GO:0006260	DNA replication	21	73	0.287671	0.999382	0.000996111	1	0.811	TICRR_DANRE	LRWD1_DANRE	RIR1_DANRE	RMI1_DANRE	TATD1_DANRE	DTL_DANRE	DDX11_DANRE	B8JIE9_DANRE	Q504I6_DANRE	A0A2R8QH82_DANRE	F1QNW3_DANRE	F1QPU2_DANRE	A0A0R4IKV7_DANRE	F1QH24_DANRE	E7F643_DANRE	B0S4Z1_DANRE	F1R2K9_DANRE	F1Q9E8_DANRE	F1QBH7_DANRE	A0A2R8QA21_DANRE	F8W2T2_DANRE
molecular_function	GO:0003743	translation initiation factor activity	21	121	0.173554	0.111968	0.926243	1	1	EI3HB_DANRE	EIF3D_DANRE	Q5RIE1_DANRE	B8JL46_DANRE	A0A2R8RSJ5_DANRE	A0A140LGN9_DANRE	F1QX94_DANRE	A0A0R4IFW9_DANRE	A3KQB2_DANRE	E7F525_DANRE	F1QX66_DANRE	A0A2R8QL84_DANRE	A0A286YA82_DANRE	B8JL45_DANRE	F1Q8P7_DANRE	A0A0R4IBA9_DANRE	F1RA36_DANRE	Z4YIM6_DANRE	F1R101_DANRE	A0A2R8Q280_DANRE	E7EYD8_DANRE
biological_process	GO:0048741	skeletal muscle fiber development	21	86	0.244186	0.477984	0.616926	1	1	MTMRC_DANRE	RIPR2_DANRE	AMR1A_DANRE	AMR1B_DANRE	X1WCS2_DANRE	E7FB31_DANRE	E9QFR8_DANRE	J9JI18_DANRE	F1R7V2_DANRE	F1QDK4_DANRE	E7FE29_DANRE	F1R0H8_DANRE	A0A0R4IXX0_DANRE	A0A2R8S0B6_DANRE	E7F7G2_DANRE	A0A0R4J7R2_DANRE	E7F632_DANRE	A0A2R8QBL5_DANRE	A0A0R4IF13_DANRE	F1QXP9_DANRE	F1QC58_DANRE
molecular_function	GO:0019955	cytokine binding	21	63	0.333333	0.127476	0.911385	1	1	A8WH88_DANRE	B3DI57_DANRE	B8JJU1_DANRE	A8WH93_DANRE	D0FH56_DANRE	A0A0R4IE17_DANRE	A8WH90_DANRE	A0A2R8QEU4_DANRE	F1RA13_DANRE	F1QMA9_DANRE	A0A0R4IJL4_DANRE	A0A0R4IT02_DANRE	F1R904_DANRE	A0A2R8S073_DANRE	A8WH84_DANRE	F1QG81_DANRE	A0A2R8QHS3_DANRE	A0A0R4IQ60_DANRE	A0A0R4IAX8_DANRE	B8A5K6_DANRE	F1QUB9_DANRE
biological_process	GO:0030318	melanocyte differentiation	21	68	0.308824	0.968836	0.0517389	1	1	LEO1_DANRE	MIB1_DANRE	DICER_DANRE	AP2E_DANRE	Q6NYI3_DANRE	Q90XD1_DANRE	A0A2R8QI76_DANRE	F8W4N1_DANRE	F1QBU7_DANRE	F1QP50_DANRE	A0A2R8QF96_DANRE	E7EXF7_DANRE	A0A2R8RSI4_DANRE	A0A2R8QQ09_DANRE	F1QVU0_DANRE	A0A2R8QED1_DANRE	Q6P975_DANRE	F1QUT5_DANRE	F1QUT4_DANRE	E9QC99_DANRE	A0A2R8QRQ5_DANRE
biological_process	GO:0030903	notochord development	21	70	0.3	0.839099	0.222125	1	1	MIB1_DANRE	COPB_DANRE	TBX2_DANRE	ZN219_DANRE	TBXTA_DANRE	B3DLK0_DANRE	E9QCK7_DANRE	Q2LDA1_DANRE	A0A0R4IMA3_DANRE	B8A5N9_DANRE	X1WFR7_DANRE	A0A2R8RUW2_DANRE	F1QYU0_DANRE	A0A0R4IHB0_DANRE	B0R171_DANRE	F1QAD6_DANRE	A0A0R4II20_DANRE	E7EXE7_DANRE	F1QD91_DANRE	F1QXN1_DANRE	A0A2R8QTC7_DANRE
biological_process	GO:0061053	somite development	21	68	0.308824	0.999989	2.01494e-05	1	0.037	COPB_DANRE	S7A6O_DANRE	TBX6L_DANRE	TBX6_DANRE	WNT5B_DANRE	TBXTA_DANRE	Q802C8_DANRE	Q1LU90_DANRE	F1R7V2_DANRE	F1QDK4_DANRE	B8A5N9_DANRE	B8JL25_DANRE	A0A2R8RUW2_DANRE	F1R0H8_DANRE	A0A0R3P9C0_DANRE	B0R171_DANRE	A0A0R4IXX0_DANRE	A0A0R4II20_DANRE	A0A0R4IF13_DANRE	F1QXP9_DANRE	F1QC58_DANRE
biological_process	GO:0060042	retina morphogenesis in camera-type eye	21	55	0.381818	0.944667	0.0756204	1	1	TBX5A_DANRE	PAL1A_DANRE	Q6W2J8_DANRE	B3DKL9_DANRE	B2KTE5_DANRE	F1R0W9_DANRE	O93599_DANRE	Q6NV46_DANRE	A0A1S6L757_DANRE	E3W6T6_DANRE	A0A0R4IGF2_DANRE	A0A2R8Q5A2_DANRE	F1R8E2_DANRE	G1K2W9_DANRE	A0A2R8Q2A2_DANRE	A0A0R4ILR3_DANRE	F1QHX5_DANRE	F1RCL8_DANRE	A0A2R8RP20_DANRE	A0A286YA27_DANRE	A0A0R4IBP9_DANRE
biological_process	GO:0000723	telomere maintenance	21	44	0.477273	0.999977	5.57698e-05	1	0.096	STN1_DANRE	NBN_DANRE	Q7M558_DANRE	A0A0R4IHR6_DANRE	B0UY57_DANRE	Q7M559_DANRE	A0A0R4ITV5_DANRE	E7F8R0_DANRE	A0A2R8RXV8_DANRE	A0A2R8QQ92_DANRE	F1QNW3_DANRE	F1QMM7_DANRE	F1QJB6_DANRE	A0A2R8Q889_DANRE	E9QF00_DANRE	A0A0R4IT14_DANRE	R4GE34_DANRE	A0A2R8Q220_DANRE	A0A2R8Q8M8_DANRE	E7F4J7_DANRE	F1QTV5_DANRE
biological_process	GO:0048015	phosphatidylinositol-mediated signaling	21	57	0.368421	0.99991	0.000189279	1	0.262	PI4KB_DANRE	A9JRB4_DANRE	F1RBR8_DANRE	F1QAD7_DANRE	F1RCP0_DANRE	F1QS56_DANRE	A0A2R8QV76_DANRE	A0A2R8Q031_DANRE	B0V3R8_DANRE	A0A2R8QSP1_DANRE	A0A0G2L6J0_DANRE	F1Q9F3_DANRE	Q1L913_DANRE	A0A2R8PZX9_DANRE	F1RB17_DANRE	A0A2R8QSM3_DANRE	F1QS65_DANRE	A0A0A0MPT6_DANRE	F8W4V1_DANRE	F6NMW9_DANRE	A0A2R8QEH0_DANRE
molecular_function	GO:0098882	structural constituent of presynaptic active zone	21	23	0.913043	1	3.23202e-12	1	0	B7ZVS4_DANRE	F8W2K0_DANRE	A0A2R8Q9B4_DANRE	A0A2R8QC86_DANRE	A0A0A0MPT1_DANRE	A0A2R8Q102_DANRE	A0A0R4IGI4_DANRE	F1QFN1_DANRE	F1QC52_DANRE	A0A0R4IGY4_DANRE	A0A0R4IFV4_DANRE	A0A2R8QV60_DANRE	A0A0R4IL25_DANRE	F1QTK1_DANRE	A0A2R8RX97_DANRE	A0A2R8QAU5_DANRE	A0A0R4IEU4_DANRE	A0A2R8PWJ7_DANRE	A0A2R8QIB9_DANRE	A0A0A0MPV1_DANRE	F6NYB5_DANRE
biological_process	GO:0010628	positive regulation of gene expression	20	88	0.227273	0.000106983	0.99994	0.105	1	PIWL2_DANRE	KLF1_DANRE	A4IG25_DANRE	Q90XD1_DANRE	Q7SX66_DANRE	A0A1D5NSQ7_DANRE	B3DHR9_DANRE	A0A2R8QMZ5_DANRE	F1RBL4_DANRE	A0A2R8QIE4_DANRE	Q1LXH4_DANRE	Q1LXH6_DANRE	Q1LXH3_DANRE	Q6P295_DANRE	Q5RIV1_DANRE	A0A0R4IRM3_DANRE	Q1LXH5_DANRE	A0A2R8QU09_DANRE	F1Q7Y7_DANRE	E7F4H0_DANRE
biological_process	GO:0050772	positive regulation of axonogenesis	20	42	0.47619	0.998801	0.00263982	1	0.981	PLXA3_DANRE	A0A286YAC4_DANRE	A0A286Y9S9_DANRE	F1QBC0_DANRE	F1QZQ3_DANRE	E7F520_DANRE	A0A0R4IDU6_DANRE	A0A2R8PX85_DANRE	E7FGY1_DANRE	A0A2R8Q3J7_DANRE	A0A2R8QJ89_DANRE	Q5RH91_DANRE	F1Q7U0_DANRE	A0A2R8Q2X5_DANRE	F1Q6L2_DANRE	F1R7J5_DANRE	A0A2R8QKV7_DANRE	B0V1S6_DANRE	A0A0R4IRZ9_DANRE	A0A140LGG1_DANRE
biological_process	GO:0048511	rhythmic process	20	69	0.289855	0.233721	0.810749	1	1	PIWL2_DANRE	NCOA2_DANRE	DTL_DANRE	F1RBN7_DANRE	A0A140LGV8_DANRE	A0A2R8Q1Y3_DANRE	F1R259_DANRE	A0A0R4IUG1_DANRE	A0A0R4IPF2_DANRE	A0A2R8Q4T2_DANRE	A0A2R8QER3_DANRE	A0A0R4INM9_DANRE	A0A0R4IPF3_DANRE	E7FGL0_DANRE	A0A2R8RUC7_DANRE	A0A2R8Q521_DANRE	A0A2R8S0D4_DANRE	A0A140LGM0_DANRE	A0A0R4IVZ7_DANRE	X1WG57_DANRE
biological_process	GO:0030218	erythrocyte differentiation	20	81	0.246914	0.916248	0.112438	1	1	HEM0_DANRE	S238A_DANRE	UFL1_DANRE	Q7T3D4_DANRE	F1Q6A2_DANRE	F1RBA7_DANRE	E7F958_DANRE	B8JL25_DANRE	A0A286YAQ6_DANRE	Q68SP3_DANRE	A0A2R8RZ82_DANRE	X1WHN6_DANRE	X1WHN7_DANRE	B0V237_DANRE	E7EYG0_DANRE	A0A0R4ICU5_DANRE	F1Q7K7_DANRE	B0V0U7_DANRE	F1Q5K6_DANRE	A0A2R8RWH2_DANRE
biological_process	GO:0042472	inner ear morphogenesis	20	46	0.434783	0.999908	0.000181186	1	0.257	HMX3_DANRE	F1QTJ6_DANRE	B3DKL9_DANRE	F1QNU4_DANRE	Q6DBY3_DANRE	E9QGZ3_DANRE	E9QIR1_DANRE	E9QJ32_DANRE	F1R4R9_DANRE	E7FGA0_DANRE	F1Q5R9_DANRE	E9QCU8_DANRE	A0A0R4ILR3_DANRE	E7FA98_DANRE	A0A0R4IA41_DANRE	F1Q6Q6_DANRE	E9QGF5_DANRE	A0A286YAA1_DANRE	E9QFU5_DANRE	F1QGL1_DANRE
molecular_function	GO:0045499	chemorepellent activity	20	80	0.25	0.764947	0.322434	1	1	SE3AB_DANRE	SEM4E_DANRE	SE3AA_DANRE	E7F898_DANRE	A0A2R8Q0R5_DANRE	A0A286Y9T7_DANRE	A0A2R8QAH3_DANRE	F1QU86_DANRE	E7FEP0_DANRE	F1QGW9_DANRE	A0A0R4IDW5_DANRE	Q1LYS1_DANRE	B8JMB1_DANRE	X1WF24_DANRE	A0A0G2KQ30_DANRE	F1RB05_DANRE	F1R7Z2_DANRE	F1R501_DANRE	A0A286YAK7_DANRE	A0A0R4IR66_DANRE
biological_process	GO:0071526	semaphorin-plexin signaling pathway	20	74	0.27027	0.984545	0.0262296	1	1	SE3AB_DANRE	SEM4E_DANRE	SE3AA_DANRE	E7F898_DANRE	A0A2R8Q0R5_DANRE	A0A286Y9T7_DANRE	A0A2R8QAH3_DANRE	F1QU86_DANRE	E7FEP0_DANRE	F1QGW9_DANRE	A0A0R4IDW5_DANRE	Q1LYS1_DANRE	B8JMB1_DANRE	X1WF24_DANRE	A0A0G2KQ30_DANRE	F1RB05_DANRE	F1R7Z2_DANRE	F1R501_DANRE	A0A286YAK7_DANRE	A0A0R4IR66_DANRE
molecular_function	GO:0008201	heparin binding	20	144	0.138889	0.00739829	0.996123	0.95	1	APOEB_DANRE	FGR1A_DANRE	NRP1A_DANRE	TSP4B_DANRE	A0A0R4IFP8_DANRE	B0S6D0_DANRE	Q1RLY9_DANRE	F1QXE5_DANRE	F8W5Z7_DANRE	E7FET3_DANRE	F1QN93_DANRE	F1RAW4_DANRE	A2CEW3_DANRE	E7F1S4_DANRE	A0A2R8QF61_DANRE	A0A2R8Q579_DANRE	A0A2R8RMW2_DANRE	A0A286Y8K7_DANRE	E7EZR4_DANRE	A0A0R4IDI3_DANRE
cellular_component	GO:0070971	endoplasmic reticulum exit site	20	34	0.588235	0.999999	3.26707e-06	1	0.002	SC23A_DANRE	SC31A_DANRE	Q6AZ98_DANRE	A0A0R4IZ17_DANRE	E7F114_DANRE	Q6P0G5_DANRE	A0A0R4IAZ9_DANRE	A0A0R4ICL5_DANRE	A0A0R4IGM8_DANRE	A0A2R8QJR2_DANRE	A0A2R8QCB9_DANRE	F1R7W8_DANRE	F1R5N2_DANRE	F1QRB4_DANRE	A0A0R4IMX2_DANRE	A0A0R4IJF7_DANRE	F1QN96_DANRE	Q5SP05_DANRE	A0A0R4IP34_DANRE	E7F715_DANRE
molecular_function	GO:0003690	double-stranded DNA binding	20	96	0.208333	1	9.07094e-117	1	0	A0A0R4IYX5_DANRE	A0A140LFX7_DANRE	A0A286YAJ0_DANRE	A0A0R4IXV5_DANRE	A0A0J9YJM3_DANRE	F8W5U2_DANRE	K7DY74_DANRE	A0A0H2UKG9_DANRE	X1WDB2_DANRE	E7F5C4_DANRE	A0A140LFS5_DANRE	A0A140LGL4_DANRE	Q90466_DANRE	A0A2R8QKT1_DANRE	Q1LWR3_DANRE	F1QEF6_DANRE	F1QYS1_DANRE	E7F2K8_DANRE	F1R096_DANRE	F1QW97_DANRE
biological_process	GO:0045739	positive regulation of DNA repair	20	35	0.571429	0.999603	0.0010843	1	0.87	BABA1_DANRE	RNF8_DANRE	ABRX1_DANRE	F1QNU4_DANRE	Q66HX1_DANRE	F1R5X1_DANRE	Q6DBY3_DANRE	E9QGZ3_DANRE	E9QIR1_DANRE	E9QJ32_DANRE	A0A0R4IMN5_DANRE	A0A0R4IIK1_DANRE	F1Q5R9_DANRE	E7F5D0_DANRE	I3IRX0_DANRE	E7FA98_DANRE	A0A0R4IA41_DANRE	F1Q974_DANRE	E9QGF5_DANRE	A3KQ54_DANRE
biological_process	GO:0045214	sarcomere organization	20	102	0.196078	0.151199	0.898521	1	1	KLF1_DANRE	X1WE86_DANRE	A0A0R4IDZ8_DANRE	E9QFR8_DANRE	F1QZQ0_DANRE	F1R7V2_DANRE	F1QDK4_DANRE	F1R3U2_DANRE	F1R7N8_DANRE	F1R0H8_DANRE	Q5U7N6_DANRE	A0A0R4IXX0_DANRE	E7F2A3_DANRE	B0S758_DANRE	A0A2R8QBL5_DANRE	F6P4R0_DANRE	A0A2R8QRY7_DANRE	A0A0R4IF13_DANRE	F1QXP9_DANRE	F1QC58_DANRE
biological_process	GO:0007369	gastrulation	20	61	0.327869	0.998419	0.00223631	1	0.974	DAAF1_DANRE	CE290_DANRE	BBS2_DANRE	MYLIB_DANRE	A5JNG8_DANRE	B0UYB0_DANRE	E9QDJ5_DANRE	A0A0R4IEP9_DANRE	F1Q6W8_DANRE	E7EXH4_DANRE	B0UY93_DANRE	F1QVN7_DANRE	F1QPM7_DANRE	A0A2R8QRB2_DANRE	A0A2R8RT44_DANRE	A0A2R8QDU7_DANRE	F1QBF1_DANRE	A0A2R8QF92_DANRE	E7EZE3_DANRE	E9QB24_DANRE
biological_process	GO:0048268	clathrin coat assembly	20	50	0.4	0.996222	0.00882876	1	1	FCHO1_DANRE	Q6AXI5_DANRE	A0A0R4IKR8_DANRE	A0A0R4IZQ7_DANRE	F1QKW9_DANRE	X1WBM9_DANRE	X1WGL1_DANRE	F1R6L2_DANRE	A0A2R8QIJ0_DANRE	A0A0R4ITB0_DANRE	F8W5M9_DANRE	A0A0R4IS02_DANRE	A0A2R8QJ16_DANRE	A0A286YBQ2_DANRE	A0A286YAZ9_DANRE	A0A2R8Q6T3_DANRE	A0A2R8QHW2_DANRE	A0A2R8QK11_DANRE	A0A2R8QB02_DANRE	F8W4F2_DANRE
biological_process	GO:0031016	pancreas development	20	79	0.253165	0.561044	0.494545	1	1	HN1BB_DANRE	HN1BA_DANRE	NOTC1_DANRE	YAP1_DANRE	TBXTA_DANRE	CELF1_DANRE	NAV3_DANRE	Q9W6U0_DANRE	F1QVS5_DANRE	F1R7N7_DANRE	F1Q5T5_DANRE	A0A286YBQ8_DANRE	A0A0R4IR44_DANRE	B8JL25_DANRE	A0A0R4IQK3_DANRE	F8W4Z3_DANRE	A0A0R4IWH7_DANRE	E9QEC0_DANRE	A0A2R8PZ52_DANRE	F8W5H7_DANRE
molecular_function	GO:0004402	histone acetyltransferase activity	20	42	0.47619	0.995564	0.0100599	1	1	A2CG09_DANRE	Q6DHD0_DANRE	B0R0X6_DANRE	F1R259_DANRE	F6NXN2_DANRE	A0A0R4IUG1_DANRE	F1R4F8_DANRE	A0A0R4IPF2_DANRE	F6NPZ8_DANRE	A0A2R8Q4T2_DANRE	A0A2R8QER3_DANRE	B8JKI8_DANRE	A0A0R4INM9_DANRE	A0A0R4IPF3_DANRE	B7ZD47_DANRE	A0A2R8Q521_DANRE	A0A0R4IVZ7_DANRE	X1WG57_DANRE	A0A0R4IY90_DANRE	B7ZD46_DANRE
biological_process	GO:0048167	regulation of synaptic plasticity	20	36	0.555556	0.997895	0.00425414	1	1	NPS4A_DANRE	B7ZVS4_DANRE	F8W2K0_DANRE	A0A0A0MPT1_DANRE	A0A2R8Q102_DANRE	F1QFN1_DANRE	A0A0R4IGY4_DANRE	A0A0R4IFV4_DANRE	A0A0R4IL25_DANRE	A0A2R8Q4Y5_DANRE	F1QXP6_DANRE	F1RCJ3_DANRE	F1R0Z6_DANRE	E9QHR1_DANRE	A0A0R4IEU4_DANRE	F1QVX7_DANRE	F1R558_DANRE	A0A0A0MPV1_DANRE	A0A0R4IIE4_DANRE	A0A2R8QE86_DANRE
biological_process	GO:0030099	myeloid cell differentiation	20	44	0.454545	0.995042	0.00701255	1	1	NPS4L_DANRE	TLE3B_DANRE	NCOA2_DANRE	Q9W6U0_DANRE	Q30JB6_DANRE	Q6NW63_DANRE	A0A1D5NSQ7_DANRE	B8ZHI7_DANRE	E7F958_DANRE	E7FF48_DANRE	E9QG91_DANRE	F1R8E1_DANRE	F1R904_DANRE	A0A2R8Q5A3_DANRE	A0A286YAQ6_DANRE	A0A2R8RZ82_DANRE	A0A0G2KUW7_DANRE	F1R8Z8_DANRE	F1QLW8_DANRE	A0A0R4IB15_DANRE
biological_process	GO:0007157	heterophilic cell-cell adhesion via plasma membrane cell adhesion molecules	20	58	0.344828	0.974831	0.0472135	1	1	TEN3_DANRE	TEN4_DANRE	E5DV48_DANRE	O93616_DANRE	A0A2R8Q360_DANRE	Q1L927_DANRE	X1WGN5_DANRE	F1QA53_DANRE	F1QU90_DANRE	F1QCA7_DANRE	F1RA92_DANRE	A0A2R8QCM5_DANRE	F1RC82_DANRE	B0CLW6_DANRE	A0A2R8Q498_DANRE	F1QTW9_DANRE	F1QK75_DANRE	A0A286Y8Z9_DANRE	A0A0R4IBP9_DANRE	A5WUN6_DANRE
molecular_function	GO:0098632	cell-cell adhesion mediator activity	20	70	0.285714	0.905036	0.149007	1	1	Q53CM6_DANRE	E7F1Y1_DANRE	A4JYK5_DANRE	A0A2R8Q6S7_DANRE	A0A2R8QRK0_DANRE	A0A2R8QL08_DANRE	F1QGY4_DANRE	A0A2R8QBC7_DANRE	A0A0R4IXF4_DANRE	A8DZ85_DANRE	F1QFK4_DANRE	F1RE66_DANRE	A0A0R4IPD4_DANRE	E7EZG5_DANRE	F1Q4W9_DANRE	A0A2R8QSX8_DANRE	F1QQK1_DANRE	F6P8D9_DANRE	A0A0R4IHP4_DANRE	F1R170_DANRE
biological_process	GO:0072015	glomerular visceral epithelial cell development	20	39	0.512821	0.999943	0.000208384	1	0.309	COQ8B_DANRE	TYRO3_DANRE	THS7A_DANRE	KANK2_DANRE	B3DHL7_DANRE	B0CM22_DANRE	A0A286Y917_DANRE	A0A2R8RKI9_DANRE	A5PMY2_DANRE	A4VCF3_DANRE	F1QAC1_DANRE	F8W3L6_DANRE	A0A0R4IS11_DANRE	Q1LUB2_DANRE	F1QJH8_DANRE	F1R8E8_DANRE	B0V1H1_DANRE	A0A0R4IT86_DANRE	A0A0R4IBP9_DANRE	A2CE93_DANRE
molecular_function	GO:0030276	clathrin binding	20	111	0.18018	0.583857	0.486632	1	1	Q6NYJ9_DANRE	Q5U3J4_DANRE	E9QC84_DANRE	A0A0R4IDZ8_DANRE	A0A2R8RWI1_DANRE	I3IS33_DANRE	F1RAR6_DANRE	A0A2R8QJD2_DANRE	A0A2R8QRX3_DANRE	B8JLD1_DANRE	A0A2R8Q6M9_DANRE	F6NK19_DANRE	U3JA52_DANRE	A0A2R8RS78_DANRE	Q5U7N6_DANRE	A5PMS9_DANRE	X1WDZ6_DANRE	A0A2R8RVP9_DANRE	E7F8R8_DANRE	F1QHJ5_DANRE
molecular_function	GO:0005220	inositol 1,4,5-trisphosphate-sensitive calcium-release channel activity	20	30	0.666667	1	2.57995e-07	1	0	A0A2R8Q2R4_DANRE	F8W4B1_DANRE	A0A2R8RSY9_DANRE	A0A2R8Q567_DANRE	A0A2R8Q711_DANRE	A0A2R8QHB5_DANRE	A0A2R8QBV7_DANRE	A0A2R8Q9S2_DANRE	A0A2R8PWX1_DANRE	A0A0R4IH08_DANRE	A0A2R8QRV0_DANRE	E7FB06_DANRE	E7F4G8_DANRE	A0A2R8QAR1_DANRE	F1R1L5_DANRE	A0A2R8PYY5_DANRE	A0A2R8Q201_DANRE	A0A2R8RZ36_DANRE	A0A0R4IX04_DANRE	A0A2R8QJM5_DANRE
cellular_component	GO:0030427	site of polarized growth	20	31	0.645161	0.996322	0.00688285	1	0.912	Q6GMH1_DANRE	B8JMD7_DANRE	X1WE04_DANRE	F1Q932_DANRE	A0A2R8QNL6_DANRE	A0A2R8PYU5_DANRE	E7EXG2_DANRE	A0A2R8QNP2_DANRE	A0A2R8QHG8_DANRE	Q1LWS2_DANRE	E7FE96_DANRE	F1QIB3_DANRE	A0A0R4I9Q9_DANRE	E7F192_DANRE	A0A2R8QPP0_DANRE	E7F8H1_DANRE	A0A2R8Q3I4_DANRE	E9QHC8_DANRE	A0A2R8QFQ8_DANRE	A0A2R8Q847_DANRE
biological_process	GO:0051607	defense response to virus	19	91	0.208791	0.622165	0.466447	1	1	ILF3_DANRE	MXB_DANRE	MXA_DANRE	MXE_DANRE	F1QY61_DANRE	A0A0R4IKJ5_DANRE	F1QZW7_DANRE	B8A4W6_DANRE	E7F8D3_DANRE	F1QZK7_DANRE	B8A4W5_DANRE	F1R3I8_DANRE	B0S648_DANRE	F1REK4_DANRE	B8A4W7_DANRE	A0A2R8RUM2_DANRE	A0A2R8QA47_DANRE	A0A2R8RW79_DANRE	A0A0G2KV16_DANRE
biological_process	GO:0001822	kidney development	19	61	0.311475	1	2.09297e-07	1	0	INVS_DANRE	BAG6_DANRE	CE290_DANRE	DNMBP_DANRE	GRB1L_DANRE	MED12_DANRE	PAX2A_DANRE	A0A0R4IT00_DANRE	Q52WY2_DANRE	B0UYB0_DANRE	A0A0R4IF82_DANRE	F1QVN7_DANRE	A0A0R4IRP1_DANRE	A0A0G2KRC3_DANRE	A0A2R8QRB2_DANRE	U3JAI2_DANRE	A0A2R8QDU7_DANRE	E7FD27_DANRE	F1Q7X5_DANRE
biological_process	GO:0048066	developmental pigmentation	19	55	0.345455	0.997328	0.00457758	1	1	MIB1_DANRE	C7DZJ6_DANRE	O57418_DANRE	Q90XD1_DANRE	O57416_DANRE	A0A2R8QI76_DANRE	A0A0R4IM38_DANRE	F1QBU7_DANRE	F1QP50_DANRE	B8A5N9_DANRE	F1R425_DANRE	A0A2R8QQ09_DANRE	F1QVU0_DANRE	A0A2R8QED1_DANRE	A0A2R8QED5_DANRE	A0A2R8QKL6_DANRE	E9QC99_DANRE	A0A0R4IKC9_DANRE	A0A2R8QJQ4_DANRE
molecular_function	GO:0003725	double-stranded RNA binding	19	59	0.322034	0.799903	0.283938	1	1	SUV3_DANRE	ILF3_DANRE	ZN346_DANRE	ZFR_DANRE	Q1LV60_DANRE	F1Q4N1_DANRE	F1RC56_DANRE	A8DZI0_DANRE	F1QB35_DANRE	E9QD44_DANRE	F1QZW7_DANRE	A0A2R8QKK6_DANRE	A0A2R8Q4T1_DANRE	F1RBH4_DANRE	F6PD25_DANRE	A0A2R8RUM2_DANRE	Q1LXV6_DANRE	B0S6Z1_DANRE	A0A2R8RW79_DANRE
biological_process	GO:0051028	mRNA transport	19	50	0.38	0.968012	0.0508535	1	1	NCBP3_DANRE	NUP42_DANRE	IRAG2_DANRE	NDC1_DANRE	IF2B1_DANRE	A0A0B4J1A6_DANRE	A1L2F4_DANRE	A0A2R8Q8A4_DANRE	A0A0R4IZD5_DANRE	F1R2H0_DANRE	B0S5I6_DANRE	A0A0R4IAQ8_DANRE	E7F981_DANRE	A9C3V8_DANRE	A0A0R4IBW5_DANRE	B0R0Z3_DANRE	A0A0B4J1B0_DANRE	F1QWS2_DANRE	E9QGM4_DANRE
cellular_component	GO:0030659	cytoplasmic vesicle membrane	19	82	0.231707	0.781989	0.256514	1	1	RHBG_DANRE	SNX17_DANRE	B0R0K7_DANRE	A5PMM5_DANRE	B0R063_DANRE	F1Q966_DANRE	F1QCK4_DANRE	F8W5K5_DANRE	A0A0R4IKT8_DANRE	F1QEX9_DANRE	A0A0R4ITX6_DANRE	Q5RGQ4_DANRE	A0A0R4IH08_DANRE	E7FB06_DANRE	A0A0R4IA72_DANRE	F1R1L5_DANRE	Q7ZZB1_DANRE	A2CG10_DANRE	A0A2R8QS07_DANRE
molecular_function	GO:0016787	hydrolase activity	19	126	0.150794	3.2676e-13	1	0	1	SMAL1_DANRE	KFA_DANRE	RENT1_DANRE	AGRV1_DANRE	E7F0G2_DANRE	F1R9W2_DANRE	A0A140LGA3_DANRE	A0A0R4INQ3_DANRE	A0A0R4ID45_DANRE	A0A140LH06_DANRE	E7FCJ6_DANRE	B0S754_DANRE	A0A2R8Q6L8_DANRE	E7F054_DANRE	F1R881_DANRE	E7FAL6_DANRE	A0A2R9YJN8_DANRE	A0A0G2KS58_DANRE	A0A2R8RW49_DANRE
biological_process	GO:0001764	neuron migration	19	57	0.333333	0.999326	0.0014143	1	0.91	SH3R1_DANRE	PMGT2_DANRE	REST_DANRE	SCRIB_DANRE	SPT5H_DANRE	F1QQ50_DANRE	A0A0R4IFF8_DANRE	F2Z4V3_DANRE	A0A0R4IQ86_DANRE	F1RBK4_DANRE	F1Q6J9_DANRE	A0A0R4IJR6_DANRE	Q5SP54_DANRE	F1QQI8_DANRE	B0V2S9_DANRE	A0A0R4II20_DANRE	B0V2S8_DANRE	A0A0R4IL00_DANRE	E7FBA8_DANRE
biological_process	GO:0007186	G protein-coupled receptor signaling pathway	19	347	0.054755	1.37212e-37	1	0	1	GP161_DANRE	GPR22_DANRE	OP1S2_DANRE	AGRG6_DANRE	F1Q5N3_DANRE	A9ZPD8_DANRE	Q6DG95_DANRE	Q1LVD8_DANRE	Q38JL1_DANRE	E4W699_DANRE	F1QCV5_DANRE	F1QU09_DANRE	F8W5T4_DANRE	F1Q8F2_DANRE	E7FAM4_DANRE	E7EYT5_DANRE	A0A140LG62_DANRE	A0A140LFR2_DANRE	A0A0R4I9J6_DANRE
biological_process	GO:0016525	negative regulation of angiogenesis	19	58	0.327586	0.963458	0.0654368	1	1	A5PF31_DANRE	F1QUT1_DANRE	F8W5Z7_DANRE	A0A0R4INY5_DANRE	F1RAN5_DANRE	A0A2R8PX08_DANRE	A0A0R4IE04_DANRE	F1RAW4_DANRE	F1QXJ7_DANRE	F6PDT3_DANRE	F1Q711_DANRE	F1Q782_DANRE	E7F1S4_DANRE	A0A2R8QF61_DANRE	A0A2R8Q579_DANRE	A0A286Y8K7_DANRE	A0A2R8PVQ8_DANRE	F1Q588_DANRE	F1R7D0_DANRE
cellular_component	GO:0030496	midbody	19	76	0.25	0.754448	0.33665	1	1	RFP4A_DANRE	RFIP3_DANRE	TPC14_DANRE	CF089_DANRE	DDX11_DANRE	E7F7I3_DANRE	Q52WY2_DANRE	E7EYJ6_DANRE	A0A288CG34_DANRE	A0A2R8QDD3_DANRE	B8A6E8_DANRE	F1Q9F3_DANRE	A0A2R8QBM8_DANRE	A0A2R8RJF1_DANRE	A8DZ53_DANRE	A0A2R8Q3U7_DANRE	A0A2R8Q2S7_DANRE	F1QWA6_DANRE	F8W4V1_DANRE
biological_process	GO:0050801	ion homeostasis	19	63	0.301587	2.02657e-08	1	0	1	F1R801_DANRE	X1WG08_DANRE	A0A0R4IZS1_DANRE	F1QTF2_DANRE	A0A2R8RYK6_DANRE	A0A2R8RT66_DANRE	F6P1L8_DANRE	E7F2F9_DANRE	A0A2R8QPF3_DANRE	A0A2R8PWB8_DANRE	A0A140LH83_DANRE	F1Q7K1_DANRE	F1QHX7_DANRE	F1QGW2_DANRE	F6NGR0_DANRE	X1WGD9_DANRE	A0A0G2L831_DANRE	E7FH51_DANRE	F1Q6T6_DANRE
biological_process	GO:0045664	regulation of neuron differentiation	19	56	0.339286	0.996019	0.00764446	1	1	MIB1_DANRE	NTF7_DANRE	Q6PBX3_DANRE	Q6NZ01_DANRE	F1Q7K3_DANRE	A0A2R8QI76_DANRE	F1QBU7_DANRE	E9QH15_DANRE	F1RB02_DANRE	F1QR36_DANRE	F8W3R9_DANRE	F1QVU0_DANRE	A0A2R8QED1_DANRE	F1Q6N0_DANRE	A0A0R4ISP1_DANRE	E7FGW2_DANRE	E9QCI7_DANRE	A0A2R8Q6M1_DANRE	E9QFC1_DANRE
biological_process	GO:0006936	muscle contraction	19	144	0.131944	1.81796e-06	0.999999	0	1	Q08BE3_DANRE	A0A2R8QQG7_DANRE	F1R7V2_DANRE	F1QDK4_DANRE	F1QPI5_DANRE	E7F062_DANRE	F1R0H8_DANRE	A0A0R4IZ82_DANRE	A0A0R4IJ91_DANRE	F1Q5L7_DANRE	A0A0R4IXX0_DANRE	E7EZF4_DANRE	F6NHQ1_DANRE	A0A2R8QQ99_DANRE	F6NHV5_DANRE	E7EYD0_DANRE	A0A0R4IF13_DANRE	F1QXP9_DANRE	F1QC58_DANRE
biological_process	GO:0016042	lipid catabolic process	19	96	0.197917	5.54355e-07	1	0	1	PLCX3_DANRE	A0A0R4IS51_DANRE	F1QH90_DANRE	A5PMC3_DANRE	F1QS56_DANRE	A0A2R8QV76_DANRE	A0A2R8PZJ4_DANRE	A0A2R8QKG1_DANRE	F1QG86_DANRE	A0A2R8Q4F0_DANRE	A0A2R8QGH7_DANRE	A0A2R8QNB2_DANRE	A0A2R8PZX9_DANRE	A0A2R8PY93_DANRE	A0A2R8QSM3_DANRE	F1QS65_DANRE	A0A0A0MPT6_DANRE	A2BG86_DANRE	A0A2R8QEH0_DANRE
biological_process	GO:0032922	circadian regulation of gene expression	19	80	0.2375	0.538858	0.565423	1	1	EGR1_DANRE	A4QN37_DANRE	B3DJN2_DANRE	Q8JIG3_DANRE	F1QUT1_DANRE	B3DK47_DANRE	B3DH92_DANRE	Q7ZU53_DANRE	A0A0R4ICG0_DANRE	F1R1X1_DANRE	A0A2R8Q8Q0_DANRE	E7F726_DANRE	Q7SZZ4_DANRE	F1RDZ4_DANRE	F1R982_DANRE	F1QZP2_DANRE	Q5RIV1_DANRE	F1R2R7_DANRE	F1RAU6_DANRE
biological_process	GO:0048839	inner ear development	19	64	0.296875	0.99995	8.29849e-05	1	0.146	CE290_DANRE	PO4F3_DANRE	SOX2_DANRE	DISP1_DANRE	Q66HX1_DANRE	Q9DFH2_DANRE	Q90XD1_DANRE	A0A2R8QEU4_DANRE	F1QMA9_DANRE	A0A2R8QRX3_DANRE	A0A2R8Q6M9_DANRE	A0A2R8S073_DANRE	A0A2R8Q5U4_DANRE	F1QQN6_DANRE	A5PMS9_DANRE	F1R0U6_DANRE	F1R4Z6_DANRE	E7F226_DANRE	F1QUB9_DANRE
biological_process	GO:0007043	cell-cell junction assembly	19	63	0.301587	0.92133	0.107451	1	1	HEG_DANRE	B0BF33_DANRE	A9C3V5_DANRE	Q5RJ81_DANRE	A0A2R8Q0L0_DANRE	E7F374_DANRE	E9QJG1_DANRE	F1RBK4_DANRE	A9C3V6_DANRE	A0A286Y804_DANRE	A0A2R8QAD2_DANRE	F1R306_DANRE	E7F116_DANRE	E7FBR0_DANRE	E7EXI3_DANRE	B0V2S9_DANRE	E7F7A0_DANRE	B0V2S8_DANRE	A0A2R8QT80_DANRE
biological_process	GO:0045732	positive regulation of protein catabolic process	19	51	0.372549	0.896683	0.145449	1	1	HACE1_DANRE	SMUF2_DANRE	U6C7X6_DANRE	A2VCZ7_DANRE	A0A286Y9V7_DANRE	Q1LYI3_DANRE	A0A2R8Q7I3_DANRE	F6P346_DANRE	X1WEK3_DANRE	F1QL68_DANRE	A0A2R8Q4L4_DANRE	A0A2R8QLH9_DANRE	A0A286YBF5_DANRE	F1QEG9_DANRE	E7F8Q5_DANRE	E7F064_DANRE	A0A2R8RTJ0_DANRE	A0A0R4IBD8_DANRE	A0A2R8QKJ2_DANRE
biological_process	GO:0055001	muscle cell development	19	40	0.475	0.783347	0.254474	1	1	F2Z4T4_DANRE	Q8AX99_DANRE	E9QFR8_DANRE	F1R7V2_DANRE	F1QDK4_DANRE	A0A2R8QBS2_DANRE	F1R0H8_DANRE	A0A0R4IC31_DANRE	E7FD18_DANRE	A0A0R4IXX0_DANRE	A0A0R4IS21_DANRE	R4GDZ5_DANRE	F8W4Z3_DANRE	A0A2R8Q9F2_DANRE	A0A0R4IWH7_DANRE	A0A2R8QBL5_DANRE	A0A0R4IF13_DANRE	F1QXP9_DANRE	F1QC58_DANRE
biological_process	GO:0007154	cell communication	19	49	0.387755	0.999999	1.64481e-06	1	0.006	B3DFM3_DANRE	X1WG23_DANRE	B6IDE3_DANRE	D7PS91_DANRE	F1Q633_DANRE	A0A0G2L1F5_DANRE	F8W4C0_DANRE	A0A2R8QFB7_DANRE	A0A2R8QUE3_DANRE	F1R4B2_DANRE	F1QXB0_DANRE	A0A0R4IH07_DANRE	F6NHY4_DANRE	A0A2R8Q1V0_DANRE	B6IDE7_DANRE	A2BHG4_DANRE	A0A0R4IQJ3_DANRE	A0A2R8QSM6_DANRE	A0A2R8QDV4_DANRE
biological_process	GO:0060028	convergent extension involved in axis elongation	19	61	0.311475	0.884972	0.178506	1	1	KLH12_DANRE	WNT5B_DANRE	TBXTA_DANRE	F2Z4T4_DANRE	Q803K8_DANRE	F1QY45_DANRE	A0A2R8QMD0_DANRE	E7FAI5_DANRE	B8JL25_DANRE	A0A2R8QBS2_DANRE	F1QSP6_DANRE	A0A0R4IC31_DANRE	A0A2R8QLF5_DANRE	A2RRV7_DANRE	A0A2R8RT96_DANRE	A0A286Y942_DANRE	F6NUK4_DANRE	A0A2R8Q9F2_DANRE	E9QB24_DANRE
molecular_function	GO:1901981	phosphatidylinositol phosphate binding	19	38	0.5	0.999999	1.87224e-06	1	0.001	B8JHS1_DANRE	B8JKJ1_DANRE	A0A2R8QRH1_DANRE	E7FEZ0_DANRE	A0A2R8RJG6_DANRE	B8JKJ2_DANRE	E9QIC8_DANRE	A0A0N5E8A0_DANRE	B8JHS0_DANRE	A0A2R8RLT5_DANRE	F1QIG8_DANRE	F1Q4W5_DANRE	F6NKU7_DANRE	A0A2R9YJQ2_DANRE	E7FDM2_DANRE	A0A2R8QKK4_DANRE	A0A2R8Q663_DANRE	A0A2R8QGI6_DANRE	F1R5I6_DANRE
biological_process	GO:0031032	actomyosin structure organization	19	58	0.327586	0.963132	0.0481213	1	1	A0A0R4IVY5_DANRE	Q4F876_DANRE	E7F1C5_DANRE	Q7T303_DANRE	Q502K8_DANRE	Q68EI5_DANRE	Q90Y37_DANRE	Q5TZ42_DANRE	Q32PU2_DANRE	A0A0R4IGU0_DANRE	B8A4X7_DANRE	E7FGD8_DANRE	A0A0R4IM03_DANRE	E7F9M7_DANRE	A0A0R4IHT4_DANRE	B8A668_DANRE	Q5TZ37_DANRE	F1QN82_DANRE	A0A2R8RNU9_DANRE
biological_process	GO:0008286	insulin receptor signaling pathway	19	34	0.558824	0.998499	0.00377817	1	1	Q68EG5_DANRE	B3DHG9_DANRE	F1QN33_DANRE	A0A0R4IUJ2_DANRE	A0A2R8RQ90_DANRE	E7FCJ4_DANRE	F1QB84_DANRE	E9QJ97_DANRE	A2BFQ2_DANRE	U3JAI8_DANRE	A0A0R4IYS3_DANRE	Q7ZVW3_DANRE	E7F4P8_DANRE	E7F2W3_DANRE	F6NVP6_DANRE	F1QSC3_DANRE	E7F104_DANRE	E7F0F4_DANRE	A0A2R8QIU7_DANRE
biological_process	GO:0031017	exocrine pancreas development	18	87	0.206897	0.278461	0.801552	1	1	NOTC1_DANRE	SART3_DANRE	F1QQA2_DANRE	B3DJD1_DANRE	Q6NYN9_DANRE	Q7SX66_DANRE	F1R5N4_DANRE	A0A2R8QM70_DANRE	E9QIQ3_DANRE	A0A0R4IG74_DANRE	A0A2R8QI31_DANRE	F1R1J1_DANRE	E9QEC4_DANRE	F8W4Z3_DANRE	A0A2R8QTE7_DANRE	A0A0G2KCN9_DANRE	A0A2R8Q9H4_DANRE	A0A0R4IWH7_DANRE
molecular_function	GO:0032452	histone demethylase activity	18	38	0.473684	1	1.09354e-06	1	0.001	PHF2_DANRE	PHF8_DANRE	KD5BB_DANRE	JARD2_DANRE	A0A2R8RU42_DANRE	Q1LUQ0_DANRE	A0A2R8RHT9_DANRE	A0A2R8QCF1_DANRE	A0A0R4IHI9_DANRE	A0A2R8Q4T8_DANRE	E7F6J7_DANRE	F6P9Q3_DANRE	A0A2R8QQQ0_DANRE	F1QPD2_DANRE	F1QNG0_DANRE	I3ITH4_DANRE	A0A0G2KR99_DANRE	A0A2R8QE74_DANRE
molecular_function	GO:0032454	histone H3-methyl-lysine-9 demethylase activity	18	21	0.857143	1	1.2177e-09	1	0	PHF2_DANRE	PHF8_DANRE	A0A2R8RU42_DANRE	Q1LUQ0_DANRE	A0A2R8RHT9_DANRE	A0A2R8Q2M3_DANRE	A0A0R4IYD2_DANRE	A0A0R4IDZ5_DANRE	A0A2R8Q4T8_DANRE	A0A2R8QQQ0_DANRE	F1QPD2_DANRE	E7F3X7_DANRE	A0A2R8PVG8_DANRE	A0A2R8QTK3_DANRE	F1QNG0_DANRE	A0A0R4ISI0_DANRE	I3ITH4_DANRE	A0A2R8QE74_DANRE
biological_process	GO:0090263	positive regulation of canonical Wnt signaling pathway	18	80	0.225	0.434577	0.66651	1	1	CAPR2_DANRE	AMER1_DANRE	AGRA2_DANRE	E9QIQ3_DANRE	A0A286Y857_DANRE	A0A2R8Q7Y7_DANRE	E7F9P0_DANRE	A0A0R4IG74_DANRE	X1WFQ5_DANRE	A0A2R8QPW9_DANRE	A0A2R8QKQ8_DANRE	A9JRQ5_DANRE	A0A2R8QR11_DANRE	E9QEC4_DANRE	A0A2R8QTE7_DANRE	A0A2R8Q9H4_DANRE	A0A0H2UKP8_DANRE	A0A0R4IWM7_DANRE
biological_process	GO:0030514	negative regulation of BMP signaling pathway	18	59	0.305085	0.919259	0.130267	1	1	SKR1B_DANRE	SMUF2_DANRE	Q9YI02_DANRE	A7MCD1_DANRE	A8WFZ3_DANRE	E9QIQ3_DANRE	F1R4W7_DANRE	B8A6H1_DANRE	F8W338_DANRE	A0A0R4IG74_DANRE	E9QGX9_DANRE	A0A2R8QFJ1_DANRE	A0A2R8PVB4_DANRE	F1RC55_DANRE	F1QEG9_DANRE	E9QEC4_DANRE	A0A2R8QTE7_DANRE	A0A2R8Q9H4_DANRE
biological_process	GO:0050919	negative chemotaxis	18	91	0.197802	0.206782	0.858673	1	1	SE3AB_DANRE	SEM4E_DANRE	SE3AA_DANRE	E7F898_DANRE	A0A2R8Q0R5_DANRE	A0A286Y9T7_DANRE	A0A2R8QAH3_DANRE	F1QU86_DANRE	F1QGW9_DANRE	A0A0R4IDW5_DANRE	Q1LYS1_DANRE	B8JMB1_DANRE	X1WF24_DANRE	A0A0G2KQ30_DANRE	F1RB05_DANRE	F1R7Z2_DANRE	F1R501_DANRE	A0A286YAK7_DANRE
biological_process	GO:0000045	autophagosome assembly	18	72	0.25	0.307901	0.770007	1	1	BECN1_DANRE	AMR1A_DANRE	AMR1B_DANRE	F1R340_DANRE	A8Y5S9_DANRE	F1QBM0_DANRE	A0A140LGA1_DANRE	E7F4Z9_DANRE	A0A2R8QC41_DANRE	A0A0R4IKT5_DANRE	E7F458_DANRE	A0A1D5NSD8_DANRE	A0A2R8Q613_DANRE	F1Q9F3_DANRE	A0A0R4IXX7_DANRE	E7FFM2_DANRE	F8W4V1_DANRE	X1WI07_DANRE
biological_process	GO:0010506	regulation of autophagy	18	67	0.268657	0.970193	0.0451624	1	1	SMR8B_DANRE	KEP1B_DANRE	UBP13_DANRE	WAC_DANRE	A0A0R4IFI0_DANRE	E9QEC9_DANRE	F1QF17_DANRE	A0A0R4IAI4_DANRE	A0A2R8QJB4_DANRE	F1R5C9_DANRE	F1REA9_DANRE	E7F4L4_DANRE	E7EXM8_DANRE	E9QDG6_DANRE	A0A2R8Q4Y6_DANRE	A0A2R8QGI4_DANRE	A0A0R4IFR5_DANRE	E7EZ13_DANRE
biological_process	GO:0072659	protein localization to plasma membrane	18	128	0.140625	0.0773725	0.945628	1	1	B0BF33_DANRE	Q08BE3_DANRE	F1QV17_DANRE	Q5RJ81_DANRE	F1QTX0_DANRE	A0A0G2L1F5_DANRE	A0A0R4IKU1_DANRE	A0A0R4IWW2_DANRE	A0A0R4IZ82_DANRE	A0A0R4IJ91_DANRE	E9QDA3_DANRE	F1QIP5_DANRE	F6NHQ1_DANRE	A0A2R8QJY5_DANRE	A0A2R8QQ99_DANRE	A2AR67_DANRE	F6NHV5_DANRE	A0A2R8RPW5_DANRE
molecular_function	GO:0044325	transmembrane transporter binding	18	100	0.18	0.179751	0.878868	1	1	Q6PHG0_DANRE	F1QV17_DANRE	K7DYG9_DANRE	A0A2R8Q4Y5_DANRE	A0A0R4IKU1_DANRE	F1QIP5_DANRE	E7FBM0_DANRE	K7DYK6_DANRE	F1RCJ3_DANRE	K7DYM6_DANRE	F1R0Z6_DANRE	E9QHR1_DANRE	F1QVX7_DANRE	A0A2R8QJY5_DANRE	A0A286YAA4_DANRE	A0A2R8RPW5_DANRE	A0A0R4IIE4_DANRE	A0A2R8QE86_DANRE
biological_process	GO:0045332	phospholipid translocation	18	57	0.315789	0.206782	0.858673	1	1	A0A2R8QH67_DANRE	Q6GMG4_DANRE	A8E5B0_DANRE	A0A2R8PW01_DANRE	X1WCP3_DANRE	A0A0R4IC01_DANRE	A0A2R8RKF4_DANRE	A0A2R8Q8E4_DANRE	Q08BV9_DANRE	E7FFK0_DANRE	A0A2R8QEZ8_DANRE	A0A0R4IZC8_DANRE	A0A2R8QNN7_DANRE	E9QIY6_DANRE	A0A2R8QJG7_DANRE	A0A286Y9U6_DANRE	E7FFH9_DANRE	A0A2R8RML2_DANRE
biological_process	GO:0051252	regulation of RNA metabolic process	18	37	0.486486	1	8.17657e-132	1	0	IF2B1_DANRE	A0A0R4IVY2_DANRE	F1Q8M8_DANRE	A0A2R8RHU1_DANRE	A0A2R8Q8A4_DANRE	A0A2R8Q3L5_DANRE	F1QYL2_DANRE	A0A2R8RHK1_DANRE	A0A2R8RRH1_DANRE	A9C3V8_DANRE	Q7SZN9_DANRE	A0A2R8RTZ0_DANRE	F6NHC4_DANRE	A0A0B4J1B0_DANRE	A0A0R4IFB2_DANRE	A0A2R8QC11_DANRE	A0A0R4IC82_DANRE	F1Q6G0_DANRE
biological_process	GO:0050808	synapse organization	18	60	0.3	0.999899	0.000157291	1	0.24	L1CA2_DANRE	DLG1_DANRE	Q5TZ25_DANRE	A0A2R8Q2V5_DANRE	F1R2Z6_DANRE	A0A0R4IGV2_DANRE	B0S6H8_DANRE	F1QBQ0_DANRE	A0A2R8PYM0_DANRE	A0A2R8Q9H7_DANRE	A0A2R8RPR2_DANRE	A0A0J9YJ57_DANRE	A2CET3_DANRE	F1QB48_DANRE	H0WFE9_DANRE	A0A286YB90_DANRE	Q5RG05_DANRE	A0A2R8RVS3_DANRE
biological_process	GO:0070374	positive regulation of ERK1 and ERK2 cascade	18	150	0.12	0.000167364	0.999931	0.16	1	A9ZPD8_DANRE	A0A2R8Q0D8_DANRE	E7FBB3_DANRE	A0A2R8RHW9_DANRE	A0A0R4IC48_DANRE	E7FAP8_DANRE	F1RD89_DANRE	A0A2R8RJ27_DANRE	X1WBP3_DANRE	A0A2R8QMZ0_DANRE	A0A2R8QRD6_DANRE	A0A1D5NSJ5_DANRE	Q5RHZ1_DANRE	A0A2R8RPQ4_DANRE	A0A0G2KQ30_DANRE	F1Q6K3_DANRE	A0A2R8PYF1_DANRE	F1QS30_DANRE
molecular_function	GO:0019992	diacylglycerol binding	18	23	0.782609	1	1.92015e-08	1	0	FITM1_DANRE	F1QVH9_DANRE	F1R275_DANRE	A0A2R8PZP4_DANRE	A0A2R8Q966_DANRE	A0A2R8QR05_DANRE	Q1LYG9_DANRE	Q1LYH0_DANRE	A0A2R8QI28_DANRE	A0A286Y8L1_DANRE	F1QMN5_DANRE	A0A2R8PVW1_DANRE	A0A2R8QCE0_DANRE	A0A0G2L109_DANRE	A0A2R8QBP3_DANRE	A0A2R8PZY5_DANRE	A0A2R8QM97_DANRE	A0A2R8QGT9_DANRE
biological_process	GO:0030223	neutrophil differentiation	18	38	0.473684	0.999836	0.000517354	1	0.562	Q9I9B7_DANRE	Q30JB6_DANRE	B8ZHI7_DANRE	F1QWG8_DANRE	E7FF48_DANRE	E7EYW7_DANRE	A0A2R8QET6_DANRE	F1R8E1_DANRE	A0A2R8Q4C2_DANRE	F1R904_DANRE	A0A2R8Q5A3_DANRE	A0A2R8QPK5_DANRE	A0A0G2KUW7_DANRE	F1R8Z8_DANRE	A3QK40_DANRE	A3QK38_DANRE	F1Q8Y1_DANRE	A0A2R8QBB5_DANRE
biological_process	GO:0003094	glomerular filtration	18	38	0.473684	0.99853	0.0040372	1	1	TYRO3_DANRE	THS7A_DANRE	TBC8B_DANRE	B8JHS1_DANRE	A0A286Y917_DANRE	E9QIC8_DANRE	E7FDV0_DANRE	B8JHS0_DANRE	A5PMY2_DANRE	A4VCF3_DANRE	F1QAC1_DANRE	F8W3L6_DANRE	Q1LUB2_DANRE	F1QJH8_DANRE	A0A1D5NS66_DANRE	A0A0R4IBP9_DANRE	A0A2R8QQJ0_DANRE	A2CE93_DANRE
biological_process	GO:0031018	endocrine pancreas development	18	92	0.195652	0.56266	0.523735	1	1	HN1BA_DANRE	RFX6_DANRE	WNT5B_DANRE	NDF1_DANRE	B0S6T1_DANRE	Q4L1M9_DANRE	F1RCH4_DANRE	F1RDU4_DANRE	E7F921_DANRE	A0A2R8RVU5_DANRE	F2Z4S1_DANRE	E7F6N6_DANRE	A0A2R8Q5U4_DANRE	F8W4Z3_DANRE	A0A0R4IWH7_DANRE	F1R4Z6_DANRE	F1R6Q4_DANRE	A0A2R8QMX9_DANRE
molecular_function	GO:0030594	neurotransmitter receptor activity	18	240	0.075	4.07189e-08	1	0	1	Q0PJT8_DANRE	F8W634_DANRE	Q568M9_DANRE	B3DH97_DANRE	F6PDA4_DANRE	X1WC43_DANRE	E9QHL0_DANRE	B8JHQ2_DANRE	F1RAQ0_DANRE	A0A286Y9K8_DANRE	A0A2R8QNR1_DANRE	F1R5G4_DANRE	A0A140LGX8_DANRE	F1QHR2_DANRE	E7EYV5_DANRE	X1WH21_DANRE	X1WHX6_DANRE	A0A140LG95_DANRE
biological_process	GO:0007266	Rho protein signal transduction	18	73	0.246575	0.925183	0.0990293	1	1	PHR4A_DANRE	PHR4B_DANRE	E9QDU2_DANRE	A0A0R4IVY5_DANRE	A0A0R4IID9_DANRE	Q90Y37_DANRE	A0A0R4IIX0_DANRE	A0A0R4IHT4_DANRE	A0A0G2L933_DANRE	A8HAL3_DANRE	E7F528_DANRE	A0A140LH23_DANRE	E7FGW0_DANRE	E7FFP7_DANRE	A0A140LG62_DANRE	A0A140LFR2_DANRE	A2BI20_DANRE	B8JIS3_DANRE
cellular_component	GO:0032587	ruffle membrane	18	50	0.36	0.993065	0.0156131	1	1	PKHO1_DANRE	CLAP2_DANRE	E7FAR1_DANRE	A0A0R4IID9_DANRE	A2RUX1_DANRE	A0A2R8PYW1_DANRE	F1R4R9_DANRE	X1WFC4_DANRE	E7FAY0_DANRE	E7FGA0_DANRE	E9QCU8_DANRE	F1Q6Q6_DANRE	X1WHV4_DANRE	A0A2R8QA33_DANRE	E9QIX7_DANRE	A0A286YAA1_DANRE	E9QFU5_DANRE	B8JIS3_DANRE
biological_process	GO:0043113	receptor clustering	18	46	0.391304	0.758748	0.335939	1	1	SCRIB_DANRE	DLG1_DANRE	B7ZVK8_DANRE	A0A2R8RHW5_DANRE	A0A2R8Q8D8_DANRE	E7EYJ7_DANRE	F1Q897_DANRE	A0A2R8QJF4_DANRE	Q5VSD9_DANRE	A0A2R8PV45_DANRE	A0A2R8QBW2_DANRE	A0A2R8QD15_DANRE	E7F9G8_DANRE	F1QPF0_DANRE	E7FH65_DANRE	F1R074_DANRE	A0A2R8QII5_DANRE	A0A0R4IEU0_DANRE
molecular_function	GO:0005544	calcium-dependent phospholipid binding	18	132	0.136364	0.0082061	0.995805	0.963	1	Q7T296_DANRE	A0A286Y928_DANRE	F1QTP9_DANRE	A0A2R8QLK0_DANRE	E9QCP7_DANRE	A0A2R8RWI1_DANRE	I3IS33_DANRE	E7F5X2_DANRE	A0A2R8RX36_DANRE	U3JA52_DANRE	A0A2R8RS78_DANRE	E7FF26_DANRE	A0A0R4ISB3_DANRE	X1WDZ6_DANRE	A0A2R8RVP9_DANRE	E7F8R8_DANRE	F1Q8I3_DANRE	X1WDX0_DANRE
biological_process	GO:0035249	synaptic transmission, glutamatergic	18	54	0.333333	0.541911	0.544388	1	1	F1QVH9_DANRE	R4GDN8_DANRE	F1R275_DANRE	A0A2R8PZP4_DANRE	A0A2R8Q966_DANRE	A0A2R8QR05_DANRE	Q1LYG9_DANRE	X1WEX9_DANRE	Q1LYH0_DANRE	A0A2R8QI28_DANRE	A0A286Y8L1_DANRE	F1QMN5_DANRE	A0A2R8QCE0_DANRE	A0A0G2L109_DANRE	A0A2R8QBP3_DANRE	A0A2R8PZY5_DANRE	A0A2R8QM97_DANRE	A0A2R8QGT9_DANRE
biological_process	GO:0090307	mitotic spindle assembly	18	33	0.545455	0.999795	0.000566015	1	0.597	ABRX1_DANRE	CLAP2_DANRE	E7F7H0_DANRE	Q6P0T6_DANRE	A0A2R8RQW0_DANRE	A8WHM7_DANRE	F1RB66_DANRE	A0A0R4IEX1_DANRE	A0A0R4IJ20_DANRE	E9QBN1_DANRE	A0A0R4I9U7_DANRE	A0A2R8RJB6_DANRE	E9QE51_DANRE	A0A2R8Q781_DANRE	A0A0R4IY38_DANRE	F1R253_DANRE	F1QK82_DANRE	A0A2R8Q094_DANRE
molecular_function	GO:0008307	structural constituent of muscle	18	30	0.6	0.999998	9.50004e-06	1	0.008	A0A2R8PZA9_DANRE	A0A0R4IJ71_DANRE	A5WV02_DANRE	F1QZQ0_DANRE	A0A2R8QKW7_DANRE	A0A2R8QR17_DANRE	F1R7N8_DANRE	A0A0R4INC4_DANRE	E9QCV2_DANRE	A0A2R8QEG3_DANRE	A0A2R8QLG6_DANRE	A0A2R8PVX9_DANRE	E7F8G7_DANRE	A0A286YBE9_DANRE	B0S758_DANRE	A0A2R8RIJ1_DANRE	E7F4T0_DANRE	B8JI51_DANRE
biological_process	GO:0003143	embryonic heart tube morphogenesis	17	40	0.425	0.893865	0.137136	1	1	DAAF1_DANRE	CCD40_DANRE	CEIP2_DANRE	TBX5A_DANRE	TBXTA_DANRE	DZIP1_DANRE	Q9W6U0_DANRE	F1QNL1_DANRE	A0A0R4IK22_DANRE	B8A5N9_DANRE	B8JL25_DANRE	A0A0R4ITE5_DANRE	A0A0R4IFE8_DANRE	A0A0R4IWG7_DANRE	A2BGA7_DANRE	A0A0R4IXU9_DANRE	A0A2R8QP40_DANRE
biological_process	GO:0061061	muscle structure development	17	62	0.274194	0.960871	0.0470721	1	1	F1QGX8_DANRE	Q4ZGL5_DANRE	Q4ZGL0_DANRE	F1QSU4_DANRE	Q4ZGK9_DANRE	Q1L9E4_DANRE	F1R1G8_DANRE	A0A2R8QM62_DANRE	F1Q6P3_DANRE	B8JIC5_DANRE	F1QU51_DANRE	A0A2R8Q829_DANRE	A0A0R4INT7_DANRE	Q8AWD9_DANRE	A0A2R8QJ58_DANRE	F1QN07_DANRE	F1QT83_DANRE
cellular_component	GO:0005759	mitochondrial matrix	17	124	0.137097	5.00922e-06	0.999998	0.001	1	SUV3_DANRE	CB069_DANRE	HEM0_DANRE	TRM5_DANRE	F1QFC0_DANRE	E7F3K7_DANRE	A0A2R8Q4A3_DANRE	A0A0R4IJX1_DANRE	A0A2R8RTA8_DANRE	A0A2R8RKQ2_DANRE	B8A452_DANRE	E7F3M0_DANRE	A0A0R4INZ8_DANRE	B7ZVD7_DANRE	B0S618_DANRE	A0A0R4IU72_DANRE	F1RE69_DANRE
biological_process	GO:0071599	otic vesicle development	17	37	0.459459	0.997637	0.00485146	1	1	SPT6H_DANRE	MIB1_DANRE	CRBN_DANRE	SOX2_DANRE	DLX3B_DANRE	Q6NYI3_DANRE	E9QGC4_DANRE	A0A2R8RSI4_DANRE	F1QX08_DANRE	Q6P975_DANRE	F8W4Z3_DANRE	F8W3V6_DANRE	F8W4S4_DANRE	A0A0R4IWH7_DANRE	F1QUT5_DANRE	F1QUT4_DANRE	A0A2R8QRQ5_DANRE
biological_process	GO:0006487	protein N-linked glycosylation	17	61	0.278689	0.801581	0.27269	1	1	F1QW63_DANRE	Q6PE41_DANRE	A3KQ03_DANRE	A0A2R8Q108_DANRE	B8A4C4_DANRE	A0A0R4IAW5_DANRE	A0A0R4IH69_DANRE	F1QFM6_DANRE	F1QFW5_DANRE	F8W3R9_DANRE	A0A0R4IV98_DANRE	A0A0J9YJ63_DANRE	F1QC34_DANRE	A0A2R8Q4I1_DANRE	A0A0J9YJJ6_DANRE	F1QTA6_DANRE	A0A0R4ILB6_DANRE
biological_process	GO:0007005	mitochondrion organization	17	55	0.309091	1.47454e-08	1	0	1	MIRO1_DANRE	CEP89_DANRE	AGRG6_DANRE	Q6WFZ4_DANRE	Q6PC13_DANRE	Q1L8P8_DANRE	A0A2R8Q0F5_DANRE	A0A0R4ILJ7_DANRE	A0A2R8QD96_DANRE	E7F307_DANRE	F1R310_DANRE	A0A0R4IJ30_DANRE	E9QH42_DANRE	A0A286Y9M7_DANRE	A0A0R4IGX0_DANRE	F1QAQ5_DANRE	A0A0R4IVN5_DANRE
biological_process	GO:0006364	rRNA processing	17	109	0.155963	0.00472336	0.997088	0.989	1	PIHD1_DANRE	DDX51_DANRE	MRM3A_DANRE	MRM3B_DANRE	WDR75_DANRE	Q7SZX9_DANRE	F1QPH6_DANRE	E7F5L8_DANRE	F1QMM1_DANRE	A0A0G2L325_DANRE	F1R759_DANRE	B8JKQ1_DANRE	A0A2R8S0C0_DANRE	A0A2R8QNY3_DANRE	A0A0R4IAU8_DANRE	A0A0R4IH57_DANRE	A0A0R4IJX7_DANRE
molecular_function	GO:0002039	p53 binding	17	25	0.68	1	1.37473e-06	1	0.001	MDM2_DANRE	BRD4_DANRE	CHD8_DANRE	A0A0R4ISD9_DANRE	A0A2R8QDZ7_DANRE	F1QUP3_DANRE	F1QJX1_DANRE	A0A2R8QQP4_DANRE	E7FH24_DANRE	F1RDT1_DANRE	A0A0R4IUG8_DANRE	A0A0G2KCN9_DANRE	A0A286YBC8_DANRE	A0A2R8QKH2_DANRE	E7F8W3_DANRE	F1R419_DANRE	Q5TZI3_DANRE
biological_process	GO:0007052	mitotic spindle organization	17	45	0.377778	0.999358	0.00128396	1	0.897	SAS6_DANRE	STIL_DANRE	NUF2_DANRE	IRAG2_DANRE	NDC80_DANRE	CLAP2_DANRE	DCTN2_DANRE	B8A574_DANRE	F1Q8W9_DANRE	A0A2R8QLJ4_DANRE	F1Q687_DANRE	A0A2R8QBK2_DANRE	A0A2R8QKM2_DANRE	A0A2R8QG93_DANRE	A0A2R8QNP6_DANRE	A0A2R8QCG1_DANRE	A8DZ53_DANRE
biological_process	GO:0019722	calcium-mediated signaling	17	79	0.21519	0.33857	0.736316	1	1	A9JRH6_DANRE	E7F3J0_DANRE	F6NTM9_DANRE	A0A286YAV6_DANRE	E7FF64_DANRE	F1Q6G4_DANRE	F1QYG8_DANRE	A0A2R8RY18_DANRE	A0A0R4IGJ6_DANRE	E7F571_DANRE	F1RBJ2_DANRE	A0A286YAS8_DANRE	F1QSH5_DANRE	A0A2R8QR28_DANRE	A0A2R8QL20_DANRE	A0A2R8QR73_DANRE	A0A0R4IHD1_DANRE
biological_process	GO:0032956	regulation of actin cytoskeleton organization	17	87	0.195402	0.870561	0.154047	1	1	Q90Y37_DANRE	A0A2R8Q349_DANRE	A0A2R8Q450_DANRE	A0A286YAK8_DANRE	E7FFF8_DANRE	A0A0R4IHT4_DANRE	F1R941_DANRE	E7FGH9_DANRE	E7EY47_DANRE	F1R7M1_DANRE	F1QAC1_DANRE	A0A2R8QQA3_DANRE	A0A140LG62_DANRE	A0A140LFR2_DANRE	E7FBD5_DANRE	A0A2R8Q4L1_DANRE	A2CE93_DANRE
biological_process	GO:0007601	visual perception	17	259	0.0656371	3.20484e-13	1	0	1	EYS_DANRE	NPHP3_DANRE	KERA_DANRE	OP1S2_DANRE	TEN3_DANRE	Q8JIZ3_DANRE	B3DK47_DANRE	Q1LVD8_DANRE	Q00P20_DANRE	A0A0R4IF44_DANRE	F1QDH9_DANRE	A0A2R8QM30_DANRE	X1WEF0_DANRE	F1QSW5_DANRE	F1Q8F2_DANRE	A0A286YBM4_DANRE	F1RAJ1_DANRE
biological_process	GO:0033334	fin morphogenesis	17	40	0.425	0.998667	0.00266524	1	0.982	DLX5A_DANRE	B6IDE3_DANRE	D7PS91_DANRE	F1Q633_DANRE	A0A2R8QFB7_DANRE	F1R4B2_DANRE	F1R7R3_DANRE	F6NHY4_DANRE	A0A2R8Q1V0_DANRE	A0A0R4IVI8_DANRE	A2BHG4_DANRE	F1QVQ2_DANRE	A0A0R4IQJ3_DANRE	F8W4Z3_DANRE	A0A0R4IWH7_DANRE	A0A2R8QSM6_DANRE	A0A2R8QDV4_DANRE
biological_process	GO:0034599	cellular response to oxidative stress	17	41	0.414634	0.79141	0.290445	1	1	KEP1B_DANRE	BRF2_DANRE	L0ANA2_DANRE	F1QS99_DANRE	E7FGA5_DANRE	A0A2R8RQT4_DANRE	U3JAR7_DANRE	F1QEX9_DANRE	A0A2R8QNW2_DANRE	A0A2R8RSR5_DANRE	Q5TZ05_DANRE	A0A2R8Q1W8_DANRE	B3DGS0_DANRE	A0A2R8PXQ2_DANRE	A0A140LH37_DANRE	F1R878_DANRE	U3JAT3_DANRE
molecular_function	GO:0070840	dynein complex binding	17	28	0.607143	0.999998	1.35207e-05	1	0.013	DAAF1_DANRE	A4IG44_DANRE	A0A2R8Q9F8_DANRE	A0A2R8QID4_DANRE	F1RBX3_DANRE	A0A2R8QLR4_DANRE	A0A2R8RHV3_DANRE	F1Q654_DANRE	A0A0R4IN88_DANRE	A0A2R8QCS5_DANRE	A0A286Y8J7_DANRE	A0A0G2L2S4_DANRE	A0A2R8QFA0_DANRE	B8JIT9_DANRE	A0A2R8QRN1_DANRE	F1Q7X5_DANRE	A0A2R8RU11_DANRE
biological_process	GO:0007259	receptor signaling pathway via JAK-STAT	17	33	0.515152	0.959946	0.0681657	1	1	JAK1_DANRE	A4QNT9_DANRE	Q4V9B2_DANRE	Q8AW20_DANRE	O93599_DANRE	Q6NV46_DANRE	A0A1S6L757_DANRE	A0A0R4IGF2_DANRE	A0A2R8S045_DANRE	B0S790_DANRE	F8W3X1_DANRE	A0A2R8RWD9_DANRE	E7FBV9_DANRE	Q68SP3_DANRE	F1QWX2_DANRE	A0A2R8QTS6_DANRE	A0A2R8Q947_DANRE
biological_process	GO:0035195	gene silencing by miRNA	17	17	1	0.999439	0.00138754	1	0.908	DISP2_DANRE	DICER_DANRE	E7FGM4_DANRE	E7F923_DANRE	A0A0R4IJ26_DANRE	A0A2R8RP64_DANRE	F1QRP4_DANRE	A0A2R8RPF4_DANRE	A0A2R8RQW3_DANRE	I3IRW6_DANRE	U3JAU2_DANRE	A0A286YB96_DANRE	A0A2R8S0G2_DANRE	E7F055_DANRE	A0A0R4ICB1_DANRE	A0A0R4IVQ1_DANRE	E7F339_DANRE
biological_process	GO:0007098	centrosome cycle	17	35	0.485714	1	4.66577e-07	1	0.001	SDCG8_DANRE	Q6TNS1_DANRE	Q08CD9_DANRE	D2XZ47_DANRE	F1RBF5_DANRE	E7F5N7_DANRE	A0A2R8QM06_DANRE	A0A2R8Q1K1_DANRE	A0A0R4INC9_DANRE	A5WW50_DANRE	A0A140TAU3_DANRE	A0A2R8Q7H2_DANRE	F8W5U4_DANRE	F1RCL4_DANRE	A0A0R4IN23_DANRE	F1QJB0_DANRE	E7EZ44_DANRE
biological_process	GO:0036297	interstrand cross-link repair	17	42	0.404762	0.990282	0.0218418	1	1	DCR1C_DANRE	FAN1_DANRE	A0A0R4IUX7_DANRE	B3DJT4_DANRE	X1WE22_DANRE	X1WC12_DANRE	B8JHS6_DANRE	F1QPU2_DANRE	F1R3N7_DANRE	A0A0G2KI26_DANRE	A0A2R8RTQ6_DANRE	A0A0G2KQM6_DANRE	E7F457_DANRE	A0A2R8QIP4_DANRE	E7FGP7_DANRE	A0A0G2KZI4_DANRE	A0A2R8QCF4_DANRE
biological_process	GO:0000077	DNA damage checkpoint signaling	17	21	0.809524	1	5.05567e-10	1	0	CEP63_DANRE	Q6DG57_DANRE	Q6P2T4_DANRE	Q1LXB1_DANRE	A2BGQ6_DANRE	A0A2R8QB18_DANRE	F1QMM7_DANRE	F1Q4W7_DANRE	F1QJB6_DANRE	A0A2R8RR17_DANRE	E9QC12_DANRE	R4GE34_DANRE	A0A2R8QAW0_DANRE	F1RBE6_DANRE	A8E7B7_DANRE	E7FD72_DANRE	A0A2R8QPA8_DANRE
biological_process	GO:0007229	integrin-mediated signaling pathway	17	101	0.168317	0.0517097	0.969213	1	1	Q5I2A9_DANRE	B3DIP9_DANRE	E7F2X5_DANRE	A0A0R4IKR0_DANRE	A0A2R8QMF7_DANRE	A0A0R4IJT2_DANRE	F1R108_DANRE	F1Q4U2_DANRE	A0A2R8RQ80_DANRE	F8W2W0_DANRE	X1WCW9_DANRE	A0A0G2KQ30_DANRE	A0A0R4IHK8_DANRE	F1QC06_DANRE	A0A0R4IME5_DANRE	B8A5K2_DANRE	F1RA51_DANRE
biological_process	GO:0032836	glomerular basement membrane development	17	33	0.515152	0.999844	0.000577114	1	0.599	COQ8B_DANRE	KANK2_DANRE	B3DHL7_DANRE	Q6EF99_DANRE	X1WG80_DANRE	Q6EFA1_DANRE	B0CM22_DANRE	Q6EFA0_DANRE	A0A286Y917_DANRE	A0A2R8RKI9_DANRE	F6P5J8_DANRE	A4VCF3_DANRE	F8W3L6_DANRE	Q1LUB2_DANRE	F1QJH8_DANRE	B0V1H1_DANRE	A0A0R4IT86_DANRE
biological_process	GO:0070509	calcium ion import	17	62	0.274194	0.0696709	0.957354	1	1	E7EEJ8_DANRE	F1QN56_DANRE	E7F278_DANRE	A0A0R4INP7_DANRE	A8B6E8_DANRE	E9QIG7_DANRE	Q5RHB1_DANRE	A0A2R8Q2T6_DANRE	X1WBF7_DANRE	E7F9F6_DANRE	A0A2R8Q1A5_DANRE	U3JA71_DANRE	F1QCC4_DANRE	F1RAM2_DANRE	E9QJF6_DANRE	Q5RHB2_DANRE	A0A0R4IRK8_DANRE
molecular_function	GO:0008094	ATP-dependent activity, acting on DNA	17	50	0.34	0.999999	9.57175e-07	1	0.001	Q5TZD9_DANRE	A2CEA8_DANRE	F1QQC9_DANRE	A0A2R8QPC0_DANRE	A0A288CFS8_DANRE	F6NTB4_DANRE	A0A0R4IUP6_DANRE	F1R294_DANRE	A0A2R8Q024_DANRE	A0A0R4IJ25_DANRE	A0A2R8QHR6_DANRE	A5PM99_DANRE	Q1MTE3_DANRE	A0A0G2KS58_DANRE	F6PBX5_DANRE	A0A2R8QSM4_DANRE	A0A2R8RRB3_DANRE
biological_process	GO:0008104	protein localization	17	58	0.293103	0.963515	0.0408498	1	1	NBEL2_DANRE	Q5BJ09_DANRE	E9QDJ5_DANRE	F1Q6W8_DANRE	A0A286Y8V9_DANRE	E7EZX7_DANRE	A0A2R8RY64_DANRE	B7ZCY9_DANRE	A0A2R8QNB9_DANRE	F1R6G2_DANRE	A0A0R4IDF6_DANRE	A0A0R4IYV1_DANRE	F1QT64_DANRE	F1R4P6_DANRE	E9QFZ1_DANRE	A0A2R8RYS1_DANRE	E7EZD1_DANRE
biological_process	GO:0051092	positive regulation of NF-kappaB transcription factor activity	17	49	0.346939	0.968429	0.0606812	1	1	TE2IP_DANRE	TRAF6_DANRE	IKKA_DANRE	Q1LUQ2_DANRE	F1QY61_DANRE	A0A2R8QPX6_DANRE	A0A2R8PYK0_DANRE	A0A2R8QPW9_DANRE	A0A2R8QFY0_DANRE	A9JRQ5_DANRE	F6NY94_DANRE	A0A2R8QR11_DANRE	F6NJE2_DANRE	B0UXK1_DANRE	B0UYS2_DANRE	E7FBZ8_DANRE	A0A2R8QA47_DANRE
biological_process	GO:0070593	dendrite self-avoidance	17	39	0.435897	0.997942	0.00561093	1	1	Q53CM6_DANRE	A4JYK5_DANRE	A0A2R8Q6S7_DANRE	A0A2R8QRK0_DANRE	A0A2R8QL08_DANRE	F1QGY4_DANRE	A0A0R4IXF4_DANRE	A8DZ85_DANRE	F1QFK4_DANRE	F1RE66_DANRE	A0A0R4IPD4_DANRE	F1Q4W9_DANRE	A0A2R8QSX8_DANRE	F1QQK1_DANRE	F6P8D9_DANRE	A0A0R4IHP4_DANRE	F1R170_DANRE
molecular_function	GO:0008093	cytoskeletal anchor activity	17	35	0.485714	0.999845	0.000560255	1	0.369	Q1L8E6_DANRE	A4IG44_DANRE	F1QV17_DANRE	A0A2R8Q9F8_DANRE	A0A2R8QID4_DANRE	F1RBX3_DANRE	A0A2R8QLR4_DANRE	A0A2R8RHV3_DANRE	A0A2R8QCS5_DANRE	A0A0G2L2S4_DANRE	A0A2R8QFA0_DANRE	B8JIT9_DANRE	A0A2R8QRN1_DANRE	A0A0R4IB32_DANRE	A0A2R8Q5K8_DANRE	F1Q515_DANRE	F1QB08_DANRE
molecular_function	GO:0019869	chloride channel inhibitor activity	17	21	0.809524	1	1.94774e-08	1	0	F1R801_DANRE	X1WG08_DANRE	F1QTF2_DANRE	A0A2R8RYK6_DANRE	A0A2R8RT66_DANRE	F6P1L8_DANRE	E7F2F9_DANRE	A0A2R8QPF3_DANRE	A0A2R8PWB8_DANRE	A0A140LH83_DANRE	F1Q7K1_DANRE	F1QHX7_DANRE	F1QGW2_DANRE	X1WGD9_DANRE	A0A0G2L831_DANRE	E7FH51_DANRE	F1Q6T6_DANRE
molecular_function	GO:0019870	potassium channel inhibitor activity	17	21	0.809524	1	1.94774e-08	1	0	F1R801_DANRE	X1WG08_DANRE	F1QTF2_DANRE	A0A2R8RYK6_DANRE	A0A2R8RT66_DANRE	F6P1L8_DANRE	E7F2F9_DANRE	A0A2R8QPF3_DANRE	A0A2R8PWB8_DANRE	A0A140LH83_DANRE	F1Q7K1_DANRE	F1QHX7_DANRE	F1QGW2_DANRE	X1WGD9_DANRE	A0A0G2L831_DANRE	E7FH51_DANRE	F1Q6T6_DANRE
biological_process	GO:0010766	negative regulation of sodium ion transport	17	21	0.809524	0.999888	0.000410487	1	0.52	F1R801_DANRE	X1WG08_DANRE	F1QTF2_DANRE	A0A2R8RYK6_DANRE	A0A2R8RT66_DANRE	F6P1L8_DANRE	E7F2F9_DANRE	A0A2R8QPF3_DANRE	A0A2R8PWB8_DANRE	A0A140LH83_DANRE	F1Q7K1_DANRE	F1QHX7_DANRE	F1QGW2_DANRE	X1WGD9_DANRE	A0A0G2L831_DANRE	E7FH51_DANRE	F1Q6T6_DANRE
biological_process	GO:1903288	positive regulation of potassium ion import across plasma membrane	17	21	0.809524	1	6.23535e-08	1	0	F1R801_DANRE	X1WG08_DANRE	F1QTF2_DANRE	A0A2R8RYK6_DANRE	A0A2R8RT66_DANRE	F6P1L8_DANRE	E7F2F9_DANRE	A0A2R8QPF3_DANRE	A0A2R8PWB8_DANRE	A0A140LH83_DANRE	F1Q7K1_DANRE	F1QHX7_DANRE	F1QGW2_DANRE	X1WGD9_DANRE	A0A0G2L831_DANRE	E7FH51_DANRE	F1Q6T6_DANRE
biological_process	GO:2000651	positive regulation of sodium ion transmembrane transporter activity	17	21	0.809524	1	6.23535e-08	1	0	F1R801_DANRE	X1WG08_DANRE	F1QTF2_DANRE	A0A2R8RYK6_DANRE	A0A2R8RT66_DANRE	F6P1L8_DANRE	E7F2F9_DANRE	A0A2R8QPF3_DANRE	A0A2R8PWB8_DANRE	A0A140LH83_DANRE	F1Q7K1_DANRE	F1QHX7_DANRE	F1QGW2_DANRE	X1WGD9_DANRE	A0A0G2L831_DANRE	E7FH51_DANRE	F1Q6T6_DANRE
biological_process	GO:0008283	cell population proliferation	16	61	0.262295	0.768928	0.25863	1	1	SETD3_DANRE	CRBN_DANRE	FA83D_DANRE	BRAT1_DANRE	SOX2_DANRE	RHDF1_DANRE	SCRIB_DANRE	UBP13_DANRE	ASCC3_DANRE	B8A574_DANRE	O93599_DANRE	Q6NV46_DANRE	A0A1S6L757_DANRE	A0A0R4IGF2_DANRE	A0A2R8QG93_DANRE	B0S687_DANRE
biological_process	GO:0010629	negative regulation of gene expression	16	37	0.432432	1	4.29734e-10	1	0	STB1A_DANRE	SMR8B_DANRE	REST_DANRE	STB1B_DANRE	YAP1_DANRE	A0A0G2L4M0_DANRE	A0A140LGI3_DANRE	B0UYL3_DANRE	A0A2R8Q5M8_DANRE	A0A0G2KLA5_DANRE	A0A2R8Q9E4_DANRE	A0A2R8Q7Y3_DANRE	A0A140LGQ8_DANRE	A0A0G2KFZ1_DANRE	A0A2R8RJW1_DANRE	A0A0R4IJ92_DANRE
biological_process	GO:0042462	eye photoreceptor cell development	16	37	0.432432	0.99051	0.0176867	1	1	CE290_DANRE	MED29_DANRE	AGRV1_DANRE	B3DKL9_DANRE	Q8JIZ3_DANRE	B0UYB0_DANRE	A0A0G2LAC3_DANRE	A0A2R8QCG7_DANRE	Q1LXR6_DANRE	Q1MTD2_DANRE	F1QVN7_DANRE	A0A0R4ILR3_DANRE	A0A2R8QRB2_DANRE	A0A2R8QDU7_DANRE	B0S5R1_DANRE	A0A0R4IBP9_DANRE
cellular_component	GO:0016605	PML body	16	50	0.32	0.967435	0.0629128	1	1	PATL1_DANRE	N4BP1_DANRE	R4L6W8_DANRE	Q1LUZ7_DANRE	Q1LUU4_DANRE	F1QD18_DANRE	E7F551_DANRE	A0A0R4INQ1_DANRE	E7F336_DANRE	E7F458_DANRE	A0A2R8QST5_DANRE	E7FEU2_DANRE	F1QQQ8_DANRE	E7F544_DANRE	E9QFT3_DANRE	X1WI07_DANRE
biological_process	GO:0009615	response to virus	16	62	0.258065	0.575405	0.502967	1	1	MXB_DANRE	MXA_DANRE	MXE_DANRE	TRAF6_DANRE	F1QDN4_DANRE	A9ZPD8_DANRE	Q1L8A5_DANRE	B8A4W6_DANRE	E7F071_DANRE	B8A4W5_DANRE	F1REK4_DANRE	F1RAS9_DANRE	B8A4W7_DANRE	F1QNG2_DANRE	B0S6Z1_DANRE	Q1L9A1_DANRE
biological_process	GO:0016082	synaptic vesicle priming	16	35	0.457143	0.989864	0.0232699	1	1	F1QVH9_DANRE	F1R275_DANRE	A0A2R8PZP4_DANRE	A0A2R8Q966_DANRE	A0A2R8QR05_DANRE	Q1LYG9_DANRE	Q1LYH0_DANRE	A0A2R8QI28_DANRE	A0A286Y8L1_DANRE	F1QMN5_DANRE	A0A2R8QCE0_DANRE	A0A0G2L109_DANRE	A0A2R8QBP3_DANRE	A0A2R8PZY5_DANRE	A0A2R8QM97_DANRE	A0A2R8QGT9_DANRE
biological_process	GO:1905515	non-motile cilium assembly	16	35	0.457143	0.999035	0.00288224	1	0.989	CE290_DANRE	BBS2_DANRE	BROMI_DANRE	B0UYB0_DANRE	E7F4E7_DANRE	F1Q6W8_DANRE	A0A2R8QB34_DANRE	F8W3F2_DANRE	F1QVN7_DANRE	A0A2R8QRB2_DANRE	E7F3T4_DANRE	A0A2R8QEZ0_DANRE	A0A2R8QDU7_DANRE	A8DZ53_DANRE	A0A286Y8M8_DANRE	E9QHV7_DANRE
molecular_function	GO:0004713	protein tyrosine kinase activity	16	120	0.133333	0.999935	0.000106925	1	0.066	Q1LUZ7_DANRE	D1L3Y5_DANRE	F8W5D1_DANRE	E7F551_DANRE	A0A0R4INQ1_DANRE	A0A2R8Q7T0_DANRE	E7FGD8_DANRE	A0A2R8QST5_DANRE	F1R3M1_DANRE	F8W425_DANRE	Q1MTA8_DANRE	A0A2R8QNB7_DANRE	E7F544_DANRE	A0A0R4II39_DANRE	E9QFT3_DANRE	F1Q4N0_DANRE
cellular_component	GO:0005681	spliceosomal complex	16	83	0.192771	0.132578	0.900108	1	1	GPKOW_DANRE	F1QND0_DANRE	Q6DRP3_DANRE	Q6DRF8_DANRE	Q7ZVN6_DANRE	F1QWB4_DANRE	F1QAZ9_DANRE	A0A0G2KUM0_DANRE	E7F4G5_DANRE	A0A2R8Q139_DANRE	E7F9S1_DANRE	A0A0R4IL44_DANRE	B0S754_DANRE	X1WHV8_DANRE	E7F2A1_DANRE	A0A2R8QJ94_DANRE
molecular_function	GO:0004386	helicase activity	16	30	0.533333	0.999998	3.93512e-06	1	0.006	SMAL1_DANRE	DICER_DANRE	A0A2R8QPC0_DANRE	F1R9W2_DANRE	X1WET4_DANRE	A0A2R8Q0K5_DANRE	F1QQV6_DANRE	E7F9S1_DANRE	E7FCJ6_DANRE	A0A0R4IJ25_DANRE	A0A2R8QHR6_DANRE	X1WHV8_DANRE	Q1MTE3_DANRE	F8W2T6_DANRE	E7FBJ2_DANRE	A0A0G2KS58_DANRE
biological_process	GO:0045746	negative regulation of Notch signaling pathway	16	39	0.410256	0.994389	0.0139295	1	1	MTA70_DANRE	YTHD2_DANRE	DLLC_DANRE	NDF1_DANRE	A0A2R8PUN1_DANRE	A0A2R8Q7E4_DANRE	A0A0R4IDE6_DANRE	A0A2R8Q5Y8_DANRE	A0A2R8QUN0_DANRE	A0A0R4IDU4_DANRE	Q5FBC1_DANRE	Q5SPB5_DANRE	A0A286Y8T8_DANRE	F1QZ44_DANRE	A0A2R8RJ10_DANRE	U3JAZ4_DANRE
biological_process	GO:0098742	cell-cell adhesion via plasma-membrane adhesion molecules	16	58	0.275862	0.996492	0.00480951	1	1	F1RD80_DANRE	A0A2R8Q5S4_DANRE	E7F374_DANRE	A0A0R4IM30_DANRE	A0A0R4IFF8_DANRE	A0A0R4IQ86_DANRE	A0A0R4IJR6_DANRE	A0A0R4IRW1_DANRE	E7FC11_DANRE	A0A0R4IB29_DANRE	E7F1W3_DANRE	A0A0R4IY18_DANRE	A0A0R4IPM4_DANRE	A0A2R8QFR7_DANRE	A0A0R4IL00_DANRE	A0A0R4IRF9_DANRE
biological_process	GO:0021591	ventricular system development	16	37	0.432432	0.974433	0.0505817	1	1	ARNT2_DANRE	PAL1A_DANRE	MED12_DANRE	DICER_DANRE	Q1L8E6_DANRE	A0A2R8Q685_DANRE	A0A2R8QPN6_DANRE	X1WCE7_DANRE	A0A2R8QSA8_DANRE	F1Q7X5_DANRE	A0A2R8QJ08_DANRE	A0A2R8QRP8_DANRE	E9QDB5_DANRE	F1R9C9_DANRE	A0A2R8Q9T9_DANRE	A0A2R8QLG2_DANRE
molecular_function	GO:0030159	signaling receptor complex adaptor activity	16	39	0.410256	0.996145	0.00820132	1	1	A0A2R8RHW5_DANRE	A0A2R8Q8D8_DANRE	A0A0R4IN35_DANRE	F1Q897_DANRE	A0A2R8Q1L8_DANRE	A0A2R8QJF4_DANRE	Q5VSD9_DANRE	A0A2R8PV45_DANRE	A0A2R8QBW2_DANRE	A0A2R8QD15_DANRE	A0A2R8PXX1_DANRE	F1QBX5_DANRE	E7FH65_DANRE	A0A2R8QII5_DANRE	A0A286Y9Q5_DANRE	F1RD62_DANRE
cellular_component	GO:0000123	histone acetyltransferase complex	16	26	0.615385	1	1.04854e-06	1	0.002	JADE3_DANRE	A9JTE3_DANRE	Q5XJ88_DANRE	A0A0R4IPE4_DANRE	F1R259_DANRE	A0A0R4IUG1_DANRE	A0A0R4IPF2_DANRE	A0A2R8Q4T2_DANRE	A0A2R8QER3_DANRE	A0A2R8Q1K8_DANRE	A0A0R4INM9_DANRE	A0A0R4IPF3_DANRE	A0A2R8Q521_DANRE	A0A0R4IVZ7_DANRE	X1WG57_DANRE	A0A0R4IY90_DANRE
biological_process	GO:0006486	protein glycosylation	16	205	0.0780488	1.50925e-08	1	0	1	EXT1A_DANRE	EXT1B_DANRE	EXT1C_DANRE	SIAT2_DANRE	F1Q8R8_DANRE	Q6PE41_DANRE	A3KQ03_DANRE	A0A0R4IGF6_DANRE	B8JLQ4_DANRE	F1Q6D3_DANRE	F1QR13_DANRE	A0A2R8Q4I1_DANRE	F1R0F8_DANRE	F1QTA6_DANRE	X1WGF8_DANRE	F1QAS8_DANRE
molecular_function	GO:0042826	histone deacetylase binding	16	54	0.296296	0.923271	0.131073	1	1	ZN703_DANRE	F1QPB3_DANRE	F1QNL1_DANRE	A0A2R8QMZ5_DANRE	A0A2R8QIE4_DANRE	Q1LXH4_DANRE	Q1LXH6_DANRE	Q1LXH3_DANRE	A0A0R4ITE5_DANRE	A2BGA7_DANRE	E9QEC2_DANRE	A0A0R4IRM3_DANRE	A0A2R8QP40_DANRE	A0A140LG36_DANRE	Q1LXH5_DANRE	A0A2R8QU09_DANRE
cellular_component	GO:0005777	peroxisome	16	97	0.164948	0.00569954	0.996973	0.715	1	M1ZMM0_DANRE	F1QIV1_DANRE	F1QBV0_DANRE	F1R3V9_DANRE	A0A2R8Q1T4_DANRE	F1QNI6_DANRE	A0A2R8QHN7_DANRE	A0A0R4IUA3_DANRE	E7F4V8_DANRE	E7F738_DANRE	F1Q9F3_DANRE	F1RB36_DANRE	A0A2R8Q9J8_DANRE	E7FBZ8_DANRE	F8W4V1_DANRE	E7F022_DANRE
biological_process	GO:0031581	hemidesmosome assembly	16	20	0.8	1	2.11361e-07	1	0	A0A2R8PZA9_DANRE	A0A0R4IJ71_DANRE	A5WV02_DANRE	A0A2R8QKW7_DANRE	A0A2R8QR17_DANRE	A0A0R4INC4_DANRE	E9QCV2_DANRE	A0A2R8QEG3_DANRE	A0A2R8QLG6_DANRE	A0A2R8PVX9_DANRE	E7F8G7_DANRE	A0A286YBE9_DANRE	F1RA51_DANRE	A0A2R8RIJ1_DANRE	A0A0G2KQI8_DANRE	E7F4T0_DANRE
molecular_function	GO:0015485	cholesterol binding	16	72	0.222222	0.558357	0.554209	1	1	APOA1_DANRE	STAR_DANRE	F1Q8X9_DANRE	F1R2E5_DANRE	A0A2R8QL19_DANRE	E9QDU3_DANRE	E7F5T7_DANRE	A0A2R8QKH3_DANRE	E9QE50_DANRE	E7F3A1_DANRE	E7F2M8_DANRE	B0S523_DANRE	A0A2R8QJU4_DANRE	A0A2R8QT19_DANRE	A0A0R4IQ17_DANRE	E7FE64_DANRE
biological_process	GO:0007498	mesoderm development	16	33	0.484848	0.999884	0.000221598	1	0.325	PO5F1_DANRE	TBXTA_DANRE	E9QHI1_DANRE	Q98873_DANRE	F1QYE2_DANRE	Q9W6I6_DANRE	F1QWZ9_DANRE	B8JL25_DANRE	A0A0R4IFW9_DANRE	A3KQB2_DANRE	Q5RIV1_DANRE	A0A2R8S019_DANRE	A0A2R8PV67_DANRE	A0A0R4IZN8_DANRE	A0A0R4IBA9_DANRE	A0A0R4IW44_DANRE
biological_process	GO:0007076	mitotic chromosome condensation	16	18	0.888889	1	1.11164e-08	1	0	NUSAP_DANRE	CHM1A_DANRE	A0A2R8Q9M3_DANRE	A2BG39_DANRE	B8A5K9_DANRE	A1L231_DANRE	F1QJY8_DANRE	A0A2R8PZ20_DANRE	A0A0R4IZC4_DANRE	A0A2R8QA26_DANRE	F1R935_DANRE	A0A2R8Q4V9_DANRE	E7FGC2_DANRE	A0A0R4IC92_DANRE	A0A0R4IRW7_DANRE	B0V123_DANRE
biological_process	GO:0042073	intraciliary transport	16	37	0.432432	0.998171	0.00414831	1	1	A7MD87_DANRE	B0UYB0_DANRE	A9C3Q6_DANRE	F1QG20_DANRE	A0A0R4IED0_DANRE	A0A286Y937_DANRE	A0A1D5NS24_DANRE	F1QUT2_DANRE	F1QVN7_DANRE	E7F294_DANRE	E9QG33_DANRE	A0A2R8QRB2_DANRE	A0A2R8QDU7_DANRE	E9QDC0_DANRE	A0A2R8QQQ9_DANRE	A0A2R8QGU9_DANRE
biological_process	GO:0033333	fin development	16	54	0.296296	0.988776	0.0175642	1	1	CRBN_DANRE	RPZ_DANRE	B6IDE3_DANRE	D7PS91_DANRE	F1Q633_DANRE	Q1LV27_DANRE	A0A2R8QFB7_DANRE	F1R4B2_DANRE	F1R7R3_DANRE	F6NHY4_DANRE	A0A2R8Q1V0_DANRE	A2BHG4_DANRE	F1QVQ2_DANRE	A0A0R4IQJ3_DANRE	A0A2R8QSM6_DANRE	A0A2R8QDV4_DANRE
biological_process	GO:0050935	iridophore differentiation	16	29	0.551724	0.999929	0.000303144	1	0.441	MED12_DANRE	Q6NYI3_DANRE	Q90XD1_DANRE	Q8QGU1_DANRE	A0A2R8QI76_DANRE	F8W4N1_DANRE	F1QBU7_DANRE	E7FAP8_DANRE	E7EXF7_DANRE	A0A2R8RSI4_DANRE	F1QVU0_DANRE	A0A2R8QED1_DANRE	Q6P975_DANRE	F1QUT5_DANRE	F1QUT4_DANRE	A0A2R8QRQ5_DANRE
molecular_function	GO:0051010	microtubule plus-end binding	16	42	0.380952	0.993732	0.0151344	1	1	CLAP2_DANRE	F1R0W9_DANRE	A0A0R4IQR0_DANRE	E7F2X0_DANRE	F1QIN6_DANRE	A8WHM7_DANRE	F6PC33_DANRE	F1R7T2_DANRE	A0A2R8QG18_DANRE	A0A2R8Q8R7_DANRE	A0A286YAU5_DANRE	A0A2R8RP20_DANRE	F8W339_DANRE	A0A286YA27_DANRE	F1R253_DANRE	A0A0R4IW36_DANRE
biological_process	GO:0009888	tissue development	16	78	0.205128	1	4.88258e-10	1	0	B3DKN2_DANRE	F1QBZ9_DANRE	F1QPJ1_DANRE	Q1MTD2_DANRE	A0A2R8RXG6_DANRE	F1QYU0_DANRE	A0A1D5NSB6_DANRE	E7EXX6_DANRE	F1QKV6_DANRE	A0A2R8Q880_DANRE	A0A0R4II20_DANRE	E9QGY9_DANRE	A0A2R8QMV5_DANRE	F1REL9_DANRE	E7F6C7_DANRE	F1R9B8_DANRE
biological_process	GO:0060213	positive regulation of nuclear-transcribed mRNA poly(A) tail shortening	16	18	0.888889	1	1.11164e-08	1	0	CNOT1_DANRE	E7FGM4_DANRE	E7F923_DANRE	A0A0R4IJ26_DANRE	A0A2R8RP64_DANRE	F1QRP4_DANRE	A0A2R8RPF4_DANRE	A0A2R8RQW3_DANRE	I3IRW6_DANRE	U3JAU2_DANRE	A0A286YB96_DANRE	A0A2R8S0G2_DANRE	E7F055_DANRE	A0A0R4ICB1_DANRE	A0A0R4IVQ1_DANRE	E7F339_DANRE
cellular_component	GO:0044232	organelle membrane contact site	16	18	0.888889	0.999997	1.9181e-05	1	0.006	E7F236_DANRE	A0A2R8Q3B1_DANRE	A0A2R8QFB2_DANRE	A0A2R8Q0E9_DANRE	F1QDS3_DANRE	E7FEJ6_DANRE	E7F9Y2_DANRE	A0A2R8QG73_DANRE	A0A2R8QC63_DANRE	A0A2R8RJE1_DANRE	A0A0G2LA96_DANRE	A0A2R8RNA9_DANRE	F1QEA4_DANRE	A0A2R8Q580_DANRE	A0A2R8RXF6_DANRE	A0A2R8RLF0_DANRE
biological_process	GO:0016188	synaptic vesicle maturation	16	21	0.761905	1	1.67582e-06	1	0.006	F1QVH9_DANRE	F1R275_DANRE	A0A2R8PZP4_DANRE	A0A2R8Q966_DANRE	A0A2R8QR05_DANRE	Q1LYG9_DANRE	Q1LYH0_DANRE	A0A2R8QI28_DANRE	A0A286Y8L1_DANRE	F1QMN5_DANRE	A0A2R8QCE0_DANRE	A0A0G2L109_DANRE	A0A2R8QBP3_DANRE	A0A2R8PZY5_DANRE	A0A2R8QM97_DANRE	A0A2R8QGT9_DANRE
biological_process	GO:0006623	protein targeting to vacuole	16	34	0.470588	0.915184	0.143574	1	1	A0JPF7_DANRE	B7ZUU8_DANRE	Q6P3K6_DANRE	Q6PBU2_DANRE	E7EY38_DANRE	F1QJI4_DANRE	B0UYE8_DANRE	A0A2R8QD96_DANRE	E7F307_DANRE	E9QH42_DANRE	A0A0R4IY07_DANRE	F1QHB9_DANRE	F6PA07_DANRE	F1R8C1_DANRE	F1QAQ5_DANRE	A2CEX5_DANRE
cellular_component	GO:0097729	9+2 motile cilium	16	19	0.842105	0.999989	3.84328e-05	1	0.014	F1R672_DANRE	E9QBH9_DANRE	A0A2R8RQB1_DANRE	F1QB07_DANRE	K7DY80_DANRE	A0A2R8Q6Y8_DANRE	A0A2R8QMF4_DANRE	I3ITD2_DANRE	A0A2R8QCS6_DANRE	A0A2R8QP75_DANRE	E7FGS8_DANRE	F1RAF1_DANRE	A0A2R8QBQ8_DANRE	A0A2R8RL41_DANRE	F1QLA3_DANRE	F1R185_DANRE
biological_process	GO:0043434	response to peptide hormone	16	35	0.457143	0.982236	0.0267245	1	1	A4QNT9_DANRE	Q4V9B2_DANRE	Q8AW20_DANRE	O93599_DANRE	Q6NV46_DANRE	A0A1S6L757_DANRE	A0A0R4IGF2_DANRE	A0A2R8S045_DANRE	B0S790_DANRE	F8W3X1_DANRE	A0A2R8RWD9_DANRE	E7FBV9_DANRE	Q68SP3_DANRE	F1QWX2_DANRE	A0A2R8QTS6_DANRE	A0A2R8Q947_DANRE
molecular_function	GO:0005540	hyaluronic acid binding	16	53	0.301887	0.934253	0.114971	1	1	A3KQB0_DANRE	A0A2R8RIX1_DANRE	E7EYM4_DANRE	X1WBP3_DANRE	X1WDI8_DANRE	X1WF73_DANRE	A0A0R4IPI0_DANRE	E0CZJ3_DANRE	F1QEZ8_DANRE	A0A2R8QLT6_DANRE	A0A2R8QK78_DANRE	E7EYJ3_DANRE	F1QFM9_DANRE	E7F663_DANRE	F1R2Q6_DANRE	A0A0R4IXT8_DANRE
molecular_function	GO:0010859	calcium-dependent cysteine-type endopeptidase inhibitor activity	16	17	0.941176	1	5.04182e-10	1	0	E9QGH3_DANRE	E9QGB1_DANRE	E9QCS2_DANRE	A0A0R4IPE6_DANRE	E9QHK0_DANRE	E9QC46_DANRE	E9QFK5_DANRE	E9QDC1_DANRE	E9QHU9_DANRE	A0A2R8RI86_DANRE	A0A0R4ILE0_DANRE	E9QGE0_DANRE	F1QZT8_DANRE	E9QF35_DANRE	E9QBC9_DANRE	E9QDV9_DANRE
biological_process	GO:0097340	inhibition of cysteine-type endopeptidase activity	16	18	0.888889	1	1.11164e-08	1	0	E9QGH3_DANRE	E9QGB1_DANRE	E9QCS2_DANRE	A0A0R4IPE6_DANRE	E9QHK0_DANRE	E9QC46_DANRE	E9QFK5_DANRE	E9QDC1_DANRE	E9QHU9_DANRE	A0A2R8RI86_DANRE	A0A0R4ILE0_DANRE	E9QGE0_DANRE	F1QZT8_DANRE	E9QF35_DANRE	E9QBC9_DANRE	E9QDV9_DANRE
biological_process	GO:0033339	pectoral fin development	15	58	0.258621	0.945558	0.0852463	1	1	P4K2B_DANRE	DLX5A_DANRE	DLX6A_DANRE	TBX5A_DANRE	Q9DFH2_DANRE	Q7SX66_DANRE	E3W6T6_DANRE	E9QDJ5_DANRE	F1Q6W8_DANRE	F1R259_DANRE	A0A0R4IUG1_DANRE	G1K2W9_DANRE	A0A0R4IU05_DANRE	A0A0R4IPF3_DANRE	X1WG57_DANRE
biological_process	GO:0031047	gene silencing by RNA	15	45	0.333333	0.998871	0.00215659	1	0.973	PIWL2_DANRE	TDRD1_DANRE	TDRD9_DANRE	CNO10_DANRE	CNOT1_DANRE	Q503G0_DANRE	E7FA32_DANRE	T1ECU4_DANRE	A4QNY2_DANRE	F1R930_DANRE	F8W2Z6_DANRE	R4GEV4_DANRE	A0A2R8QRK5_DANRE	E7F3W9_DANRE	A0A2R8QPQ1_DANRE
biological_process	GO:0007099	centriole replication	15	23	0.652174	1	7.24949e-08	1	0	PLK4_DANRE	SAS6_DANRE	CP135_DANRE	CEP63_DANRE	POC1B_DANRE	A0A0R4I9S3_DANRE	A0A2R8RZI9_DANRE	X1WBK2_DANRE	E7F2G9_DANRE	F1RB74_DANRE	A0A0R4IEX1_DANRE	F1R3P9_DANRE	A0A2R8RJB6_DANRE	A0A140LFQ5_DANRE	X1WC30_DANRE
biological_process	GO:0051014	actin filament severing	15	42	0.357143	0.963325	0.071988	1	1	Q1RLT7_DANRE	F1Q6K8_DANRE	X1WEC4_DANRE	A0A2R8Q3W8_DANRE	F1QVU3_DANRE	A0A2R8RPR6_DANRE	X1WE86_DANRE	A0A2R8QCX4_DANRE	F1QU62_DANRE	F1R3V3_DANRE	A0A2R8Q0D6_DANRE	E9QJ38_DANRE	A0A2R8Q7K6_DANRE	U3JAV9_DANRE	X1WDI1_DANRE
biological_process	GO:0042147	retrograde transport, endosome to Golgi	15	80	0.1875	0.149053	0.902238	1	1	RIC1_DANRE	Q4VA89_DANRE	Q1LYA7_DANRE	Q567Y3_DANRE	Q7SY45_DANRE	B8JKJ1_DANRE	A0A0R4IY52_DANRE	B8JKJ2_DANRE	A0A0R4IDN5_DANRE	A0A2R8RKH5_DANRE	F1R0A4_DANRE	B8A541_DANRE	F8W5C6_DANRE	A0A2R8QGI6_DANRE	F1R5I6_DANRE
biological_process	GO:0045494	photoreceptor cell maintenance	15	43	0.348837	0.963325	0.071988	1	1	EYS_DANRE	NRF1_DANRE	CE290_DANRE	DCTN2_DANRE	Q52WY2_DANRE	B0UYB0_DANRE	A0A2R8PY65_DANRE	F1QVN7_DANRE	A0A2R8QRB2_DANRE	F1QIV7_DANRE	A0A2R8RT44_DANRE	A0A2R8QDU7_DANRE	F1QBF1_DANRE	A0A2R8QMH9_DANRE	A0A0R4IBP9_DANRE
cellular_component	GO:0032991	protein-containing complex	15	64	0.234375	1	7.25277e-10	1	0	MIB1_DANRE	OSTA_DANRE	TBX5A_DANRE	ELAV4_DANRE	B8K0D5_DANRE	Q6TGY6_DANRE	O93616_DANRE	Q1L927_DANRE	F1QCA7_DANRE	A0A2R8QCM5_DANRE	A0A2R8QGU6_DANRE	Q5RIV1_DANRE	A0A0R4IRQ4_DANRE	A0A0R4IBP9_DANRE	A5WUN6_DANRE
biological_process	GO:0031290	retinal ganglion cell axon guidance	15	68	0.220588	0.448426	0.659587	1	1	PTC1_DANRE	TEN3_DANRE	DISP1_DANRE	DZIP1_DANRE	B0S6T1_DANRE	F1QBD4_DANRE	F1QNH9_DANRE	F1QX08_DANRE	A0A0R4II20_DANRE	F8W4Z3_DANRE	F8W3V6_DANRE	F8W4S4_DANRE	A0A0R4IWH7_DANRE	F1QAC4_DANRE	A0A2R8QMX9_DANRE
biological_process	GO:0030178	negative regulation of Wnt signaling pathway	15	48	0.3125	0.989369	0.0167755	1	1	NKD2_DANRE	NKD2L_DANRE	MYLIB_DANRE	NKD1_DANRE	AMER1_DANRE	CHD8_DANRE	F1QTT3_DANRE	Q68EG5_DANRE	A7MCD1_DANRE	Q5TYS1_DANRE	A0A2R8QDB8_DANRE	A0A0G2KHX4_DANRE	A0A286Y892_DANRE	E7FH24_DANRE	F1QSC3_DANRE
biological_process	GO:0042593	glucose homeostasis	15	40	0.375	0.761846	0.335361	1	1	HN1BA_DANRE	RFX6_DANRE	YAP1_DANRE	A0A2R8Q844_DANRE	Q1LWJ4_DANRE	F1RCH4_DANRE	E7F921_DANRE	A0A2R8RVU5_DANRE	A0A0R4IU95_DANRE	F1QNX5_DANRE	A0A0R4IGP2_DANRE	F1QB13_DANRE	A0A286Y9P5_DANRE	A0A2R8QR15_DANRE	A0A2R8QM53_DANRE
molecular_function	GO:0017075	syntaxin-1 binding	15	35	0.428571	0.998175	0.00534913	1	0.982	A0A2R9YJG3_DANRE	D3KVM2_DANRE	Q6IQK3_DANRE	A0A2R8QMH8_DANRE	F1QVH9_DANRE	F1R275_DANRE	A0A2R8PY21_DANRE	F1QM13_DANRE	A0A2R8QHA2_DANRE	F1RAE9_DANRE	A0A2R8QCE0_DANRE	A0A0G2L109_DANRE	A0A2R8PZY5_DANRE	A0A0R4IQM9_DANRE	A0A2R8QGT9_DANRE
molecular_function	GO:0016301	kinase activity	15	99	0.151515	0.000656921	0.999458	0.184	1	COQ8A_DANRE	COQ8B_DANRE	F1RBR8_DANRE	B3DH98_DANRE	A0A0R4IPE4_DANRE	D3GE88_DANRE	Q7T2L8_DANRE	Q6P0K1_DANRE	A4IFZ0_DANRE	A0A0R4IK92_DANRE	F1QJB6_DANRE	Q7ZVW3_DANRE	R4GE34_DANRE	A0A2R8QCE7_DANRE	F1RAP1_DANRE
biological_process	GO:0035118	embryonic pectoral fin morphogenesis	15	37	0.405405	0.992201	0.0191238	1	1	CRBN_DANRE	SP9_DANRE	NIPLA_DANRE	TBX5A_DANRE	MED12_DANRE	B3DKL9_DANRE	Q9DFH2_DANRE	Q7SX66_DANRE	A0A1D5NSE4_DANRE	F1QI36_DANRE	F1RCP0_DANRE	A0A0R4ILR3_DANRE	F1QDF2_DANRE	F8W4Z3_DANRE	A0A0R4IWH7_DANRE
molecular_function	GO:0008157	protein phosphatase 1 binding	15	36	0.416667	0.997389	0.0073052	1	0.993	PHR4A_DANRE	PHR4B_DANRE	E7F3J0_DANRE	E7EZR5_DANRE	A0A2R8QNW3_DANRE	A0A0R4IPH0_DANRE	G1K2M1_DANRE	E7F487_DANRE	A0A0R4IGJ6_DANRE	X1WB97_DANRE	A0A2R8QR28_DANRE	A0A0R4IXC4_DANRE	A0A2R8QL20_DANRE	A0A2R8QR73_DANRE	E7FEM0_DANRE
biological_process	GO:0070534	protein K63-linked ubiquitination	15	36	0.416667	0.994499	0.0132878	1	1	RN152_DANRE	RNF8_DANRE	TRAF6_DANRE	R213A_DANRE	R213B_DANRE	Q8JFV5_DANRE	U6C7X6_DANRE	A2VCZ7_DANRE	F6P346_DANRE	I3IRX0_DANRE	F6NY94_DANRE	A0A0R4IGL6_DANRE	B0UXK1_DANRE	A0A0R4IBD8_DANRE	A0A2R8PW57_DANRE
biological_process	GO:0060047	heart contraction	15	118	0.127119	6.55286e-09	1	0	1	RFOX1_DANRE	ALPK2_DANRE	B3DJX4_DANRE	B3DFS9_DANRE	F6NYL9_DANRE	E9QJ94_DANRE	F1QZQ0_DANRE	F1R7N8_DANRE	E7FAN4_DANRE	B8A5T9_DANRE	E7EZ05_DANRE	A0A2R8Q9W1_DANRE	B0S758_DANRE	B8JLS3_DANRE	A0A2R8QRD5_DANRE
biological_process	GO:0001841	neural tube formation	15	31	0.483871	0.971833	0.0513185	1	1	DLX5A_DANRE	DAPLE_DANRE	DLX6A_DANRE	SCRIB_DANRE	PAL1A_DANRE	Q6VUB8_DANRE	Q6TNS1_DANRE	I3ISQ9_DANRE	A0A0R4IFF8_DANRE	B7ZDE9_DANRE	A0A0R4IQ86_DANRE	A0A0R4IJR6_DANRE	A5WW50_DANRE	A0A2R8Q7H2_DANRE	A0A0R4IL00_DANRE
biological_process	GO:0006629	lipid metabolic process	15	113	0.132743	1.20397e-27	1	0	1	C27C1_DANRE	FADS2_DANRE	E7F0B3_DANRE	A0A2R8QL31_DANRE	A0A2R8QRJ5_DANRE	E7FDG8_DANRE	A0A2R8Q7R8_DANRE	A0A0R4IHC1_DANRE	A0A2R8RHL6_DANRE	A0A2R8QE21_DANRE	A0A2R8Q244_DANRE	F1QYL5_DANRE	A0A0R4IKB8_DANRE	E9QIZ4_DANRE	E7F067_DANRE
molecular_function	GO:0019904	protein domain specific binding	15	22	0.681818	0.999719	0.000490655	1	0.282	Q567G5_DANRE	Q1LV18_DANRE	Q7SYK6_DANRE	Q5XIZ7_DANRE	A0A0R4IDC8_DANRE	E7FCY1_DANRE	R4GEF6_DANRE	F1QC36_DANRE	R4GEJ9_DANRE	F1Q8M3_DANRE	A0A2R8RIK5_DANRE	F1QJ24_DANRE	A0A2R8QDC2_DANRE	E9QBT3_DANRE	E7EXU4_DANRE
molecular_function	GO:0008138	protein tyrosine/serine/threonine phosphatase activity	15	95	0.157895	0.0610078	0.962948	1	1	CC14A_DANRE	Q7ZVN3_DANRE	A0A2R8QM14_DANRE	Q1L9G1_DANRE	X1WFY2_DANRE	E7FH10_DANRE	Q6P3I4_DANRE	A0A2R8QGU0_DANRE	A0A0R4IAC0_DANRE	A5PMX2_DANRE	A0A2R8RXU6_DANRE	E9QCC5_DANRE	F8W600_DANRE	F8W5R0_DANRE	F8W2B2_DANRE
molecular_function	GO:0050660	flavin adenine dinucleotide binding	15	98	0.153061	0.301802	0.760149	1	1	Q5TZD3_DANRE	A2BIN8_DANRE	Q7T1D7_DANRE	F1QS99_DANRE	F1Q8J4_DANRE	F6NN73_DANRE	F1Q7F3_DANRE	E7FGA5_DANRE	A0A2R8RQT4_DANRE	F1R3V9_DANRE	A0A2R8RSR5_DANRE	A0A2R8Q1W8_DANRE	F1R509_DANRE	A0A140LH37_DANRE	F1QML0_DANRE
biological_process	GO:0048854	brain morphogenesis	15	48	0.3125	0.98658	0.0271477	1	1	CTNA2_DANRE	F1QJ05_DANRE	F1QCQ3_DANRE	F1R7N7_DANRE	F1Q5T5_DANRE	F1R662_DANRE	A0A286YBQ8_DANRE	A0A0G2KGP5_DANRE	A5WVY0_DANRE	F1QBX1_DANRE	A0A0R4IQK3_DANRE	E7F1U4_DANRE	E9QHX3_DANRE	A0A0R4II20_DANRE	A0A2R8PZ52_DANRE
biological_process	GO:0060215	primitive hemopoiesis	15	56	0.267857	0.996317	0.00683515	1	1	NPS4L_DANRE	SMYD5_DANRE	NCOA2_DANRE	HXD4A_DANRE	F1RBA7_DANRE	Q6DHD0_DANRE	Q5TYS1_DANRE	B0R0X6_DANRE	F6NXN2_DANRE	E7F716_DANRE	F6NPZ8_DANRE	Q5RIV1_DANRE	A0A286Y8Y8_DANRE	E7F7E3_DANRE	X1WFV4_DANRE
biological_process	GO:0021549	cerebellum development	15	35	0.428571	0.991141	0.0178132	1	1	CE290_DANRE	OTX2_DANRE	WDR73_DANRE	PAX2A_DANRE	CHM1A_DANRE	A0S0R1_DANRE	Q90ZB2_DANRE	Q8QGU1_DANRE	F8W3X0_DANRE	F1QE03_DANRE	F1QE84_DANRE	F1QHE7_DANRE	A0A2R8QT61_DANRE	E7F630_DANRE	A0A286YAA0_DANRE
molecular_function	GO:0003684	damaged DNA binding	15	45	0.333333	0.946956	0.0976449	1	1	DCR1C_DANRE	NBN_DANRE	F1Q570_DANRE	A0A2R8RKD0_DANRE	E7F6Y7_DANRE	F1QHZ1_DANRE	X1WGQ9_DANRE	E7F5C4_DANRE	A2CEB0_DANRE	A0A2R8RWF4_DANRE	E7F8G9_DANRE	F1R7V7_DANRE	A5PN27_DANRE	E7F457_DANRE	B0S5R3_DANRE
biological_process	GO:0030900	forebrain development	15	48	0.3125	0.994824	0.00780831	1	1	NPS4A_DANRE	PAX6_DANRE	SOX2_DANRE	MED12_DANRE	CHD8_DANRE	A0A2R8QM99_DANRE	B3DH68_DANRE	Q5SP48_DANRE	A0A0R4ICW0_DANRE	A0A0R4IF59_DANRE	F1QA18_DANRE	Q5SP49_DANRE	A0A0R4ISY7_DANRE	A0A0R4INK8_DANRE	A0A0R4IL48_DANRE
biological_process	GO:0030513	positive regulation of BMP signaling pathway	15	37	0.405405	0.992201	0.0191238	1	1	A0A2R8RIA1_DANRE	Q6DRP3_DANRE	A0A2R8Q9A3_DANRE	F1R7N7_DANRE	F1Q5T5_DANRE	Q5RGE8_DANRE	A0A286YBQ8_DANRE	A0A288CG34_DANRE	A0A2R8Q0H3_DANRE	A0A0R4IQK3_DANRE	A0A2R8Q0N9_DANRE	B8A6E8_DANRE	F1QAD6_DANRE	A0A2R8Q3U7_DANRE	A0A2R8PZ52_DANRE
biological_process	GO:0051209	release of sequestered calcium ion into cytosol	15	24	0.625	0.989483	0.024737	1	1	WNT5B_DANRE	F6PDA4_DANRE	E7FAI5_DANRE	B8JHQ2_DANRE	F1QCK4_DANRE	F8W5K5_DANRE	A0A0R4IKT8_DANRE	F1QEX9_DANRE	Q5RGQ4_DANRE	A2RRV7_DANRE	A0A0R4IH08_DANRE	E7FB06_DANRE	A0A0R4IA72_DANRE	F1R1L5_DANRE	A0A2R8QS07_DANRE
molecular_function	GO:0005049	nuclear export signal receptor activity	15	20	0.75	1	8.10964e-07	1	0	NUP42_DANRE	XPO4_DANRE	XPO2_DANRE	B0S8I3_DANRE	A0A0R4IWU7_DANRE	F1RDC5_DANRE	A0A0R4IUH7_DANRE	A0A0R4IK82_DANRE	A0A2R8RNP8_DANRE	A0A2R8QKF9_DANRE	F1Q5C6_DANRE	A0A0R4IA10_DANRE	E7F0E8_DANRE	A0A0R4IGB7_DANRE	E7FBU7_DANRE
biological_process	GO:0051017	actin filament bundle assembly	15	57	0.263158	0.739245	0.33484	1	1	BI2L2_DANRE	A0A0R4IID9_DANRE	F1R599_DANRE	F1R0H8_DANRE	X1WDN9_DANRE	F8W3Z4_DANRE	A0A0J9YIX2_DANRE	F1QCE2_DANRE	A5PM88_DANRE	A0A0R4IXX0_DANRE	A0A0R4IB32_DANRE	A0A2R8Q5K8_DANRE	F6PEI4_DANRE	B0S4T8_DANRE	F1QB08_DANRE
molecular_function	GO:0003887	DNA-directed DNA polymerase activity	15	33	0.454545	0.999169	0.00269511	1	0.902	B8JIE9_DANRE	F8W5R6_DANRE	F1RDP8_DANRE	B0V351_DANRE	E7F6Y7_DANRE	A0A286Y9F7_DANRE	A0A0R4IPZ0_DANRE	A2CEB0_DANRE	E7FDC5_DANRE	F1QSQ9_DANRE	A0A2R8PX42_DANRE	E7FB68_DANRE	E9QIM3_DANRE	B0S5R3_DANRE	F1Q4P4_DANRE
biological_process	GO:0007623	circadian rhythm	15	54	0.277778	0.121757	0.91252	1	1	NFIL3_DANRE	A4IG25_DANRE	A0A2R8RSG0_DANRE	Q8JIG3_DANRE	B3DH92_DANRE	A0A0R4IH97_DANRE	A0A0A0MPJ6_DANRE	F1Q4X0_DANRE	F1QY70_DANRE	F1R7W5_DANRE	F1QZP2_DANRE	Q5RIV1_DANRE	F1QKJ7_DANRE	A0A2R8QGX8_DANRE	E7F4H0_DANRE
molecular_function	GO:0032934	sterol binding	15	42	0.357143	0.483401	0.620243	1	1	B0S5M3_DANRE	F1R2E5_DANRE	A0A2R8QL19_DANRE	E9QDU3_DANRE	E7F5T7_DANRE	A0A2R8QKH3_DANRE	E9QE50_DANRE	E7F3A1_DANRE	E7F2M8_DANRE	B0S523_DANRE	A0A2R8QJU4_DANRE	E7FGK0_DANRE	A0A2R8QT19_DANRE	A0A0R4IQ17_DANRE	E7FE64_DANRE
biological_process	GO:0043408	regulation of MAPK cascade	15	41	0.365854	0.0487948	0.962181	1	1	Q4F876_DANRE	X1WGA8_DANRE	A0A0R4IEP9_DANRE	A0A0R4IIN0_DANRE	B0UY93_DANRE	E7F885_DANRE	A0A0R4IP53_DANRE	A0A2R8QUH6_DANRE	X1WD79_DANRE	A0A2R8RPD7_DANRE	A0A0R4IJH5_DANRE	E9QBC8_DANRE	A0A0R4IVF8_DANRE	A0A0R4IWP5_DANRE	X1WGQ4_DANRE
biological_process	GO:0051897	positive regulation of protein kinase B signaling	15	23	0.652174	0.999995	3.25992e-05	1	0.066	TIE2_DANRE	F1RD88_DANRE	A0A2R8PYK8_DANRE	A0A2R8Q844_DANRE	Q1LWJ4_DANRE	A0A0R4IL16_DANRE	E7EYX4_DANRE	F1QNX5_DANRE	A0A0R4ICH0_DANRE	A0A0R4IGP2_DANRE	F1Q9T1_DANRE	A0A286Y9P5_DANRE	E7F0Y5_DANRE	A0A2R8QR15_DANRE	A0A2R8QM53_DANRE
biological_process	GO:0006611	protein export from nucleus	15	23	0.652174	0.999975	0.000131392	1	0.214	XPO4_DANRE	XPO2_DANRE	A0A0R4IWU7_DANRE	F1RDC5_DANRE	A0A0R4IUH7_DANRE	A0A0R4IK82_DANRE	A0A2R8RNP8_DANRE	A0A2R8QKF9_DANRE	F1Q5C6_DANRE	A0A0R4IL24_DANRE	A0A0R4IA10_DANRE	E7F0E8_DANRE	F1QVK9_DANRE	F1Q591_DANRE	E7FBU7_DANRE
biological_process	GO:0048706	embryonic skeletal system development	15	40	0.375	0.99843	0.00230171	1	0.98	B3DLK0_DANRE	Q6EF99_DANRE	A2CG09_DANRE	Q2LDA1_DANRE	Q9PVF5_DANRE	Q6EFA0_DANRE	F1R3V5_DANRE	A0A0R4IMA3_DANRE	A0A0R4IHB0_DANRE	A0A0R4IH08_DANRE	A0A2R8QK51_DANRE	A0A2R8QGR2_DANRE	F1R1L5_DANRE	E9QBU8_DANRE	E7FAE9_DANRE
molecular_function	GO:0046935	1-phosphatidylinositol-3-kinase regulator activity	15	38	0.394737	0.994974	0.0129008	1	1	B0EVP9_DANRE	A0A2R8Q2X0_DANRE	A0A0R4IFZ8_DANRE	B3DHG9_DANRE	A0A0R4IUJ2_DANRE	B0EVP5_DANRE	A0A2R8Q7V8_DANRE	F1QCV5_DANRE	F1QB84_DANRE	F1QI15_DANRE	A0A0R4IYS3_DANRE	L0N8W2_DANRE	Q7ZVW3_DANRE	F6NVP6_DANRE	A0A2R8QIU7_DANRE
cellular_component	GO:0008305	integrin complex	15	57	0.263158	0.797576	0.298286	1	1	Q5I2A9_DANRE	B3DIP9_DANRE	E7F2X5_DANRE	A0A2R8QMF7_DANRE	A0A0R4IJT2_DANRE	F1R108_DANRE	F1Q4U2_DANRE	A0A2R8RQ80_DANRE	F8W2W0_DANRE	X1WCW9_DANRE	A0A0R4IHK8_DANRE	F1QC06_DANRE	A0A0R4IME5_DANRE	B8A5K2_DANRE	F1RA51_DANRE
molecular_function	GO:0015248	sterol transporter activity	15	39	0.384615	0.993743	0.0139691	1	1	B0S5M3_DANRE	F1R2E5_DANRE	A0A2R8QL19_DANRE	E9QDU3_DANRE	E7F5T7_DANRE	A0A2R8QKH3_DANRE	E9QE50_DANRE	E7F3A1_DANRE	E7F2M8_DANRE	B0S523_DANRE	A0A2R8QJU4_DANRE	E7FGK0_DANRE	A0A2R8QT19_DANRE	A0A0R4IQ17_DANRE	E7FE64_DANRE
cellular_component	GO:0035371	microtubule plus-end	15	33	0.454545	0.999353	0.00215245	1	0.545	A9JTE3_DANRE	F1R0W9_DANRE	A0A0R4IQR0_DANRE	E7F2X0_DANRE	F1QIN6_DANRE	F6PC33_DANRE	F1R7T2_DANRE	A0A2R8QG18_DANRE	A0A2R8Q8R7_DANRE	A0A286YAU5_DANRE	A0A2R8RP20_DANRE	F8W339_DANRE	A0A286YA27_DANRE	E9QFH4_DANRE	A0A0R4IW36_DANRE
cellular_component	GO:0030056	hemidesmosome	15	18	0.833333	1	5.01145e-08	1	0	A0A2R8PZA9_DANRE	A0A0R4IJ71_DANRE	A5WV02_DANRE	A0A2R8QKW7_DANRE	A0A2R8QR17_DANRE	A0A0R4INC4_DANRE	E9QCV2_DANRE	A0A2R8QEG3_DANRE	A0A2R8QLG6_DANRE	A0A2R8PVX9_DANRE	E7F8G7_DANRE	A0A286YBE9_DANRE	A0A2R8RIJ1_DANRE	A0A0G2KQI8_DANRE	E7F4T0_DANRE
biological_process	GO:0051321	meiotic cell cycle	14	47	0.297872	0.974456	0.0361648	1	1	PIWL2_DANRE	TDRD1_DANRE	HORM1_DANRE	NBN_DANRE	B3DIU9_DANRE	Q1RLP7_DANRE	E9QGA1_DANRE	A0A2R8RXV8_DANRE	E9QF00_DANRE	F6PFE9_DANRE	B1H1M4_DANRE	R4GEV4_DANRE	A0A2R8QRK5_DANRE	A0A2R8QPQ1_DANRE
molecular_function	GO:0035064	methylated histone binding	14	55	0.254545	0.833104	0.254878	1	1	PHF2_DANRE	PHF8_DANRE	LRWD1_DANRE	GLYR1_DANRE	TDRD3_DANRE	Q6DHF1_DANRE	U3JB43_DANRE	Q6IQ71_DANRE	A0A286YBF2_DANRE	E7F2Q3_DANRE	A0A2R8Q3B9_DANRE	X1WDW8_DANRE	F1Q982_DANRE	E7F366_DANRE
molecular_function	GO:0106306	protein serine/threonine phosphatase activity	14	121	0.115702	NA	NA	NA	NA	CC14A_DANRE	RPAP2_DANRE	Q7ZVN3_DANRE	Q7T2L8_DANRE	Q6NYH0_DANRE	X1WFY2_DANRE	E7FH10_DANRE	A0A0R4IAC0_DANRE	A0A0G2KPF8_DANRE	A5PMX2_DANRE	A0A0R4IE73_DANRE	A0A2R8RXU6_DANRE	F8W600_DANRE	F8W2B2_DANRE
molecular_function	GO:0106307	protein serine/threonine phosphatase activity	14	121	0.115702	NA	NA	NA	NA	CC14A_DANRE	RPAP2_DANRE	Q7ZVN3_DANRE	Q7T2L8_DANRE	Q6NYH0_DANRE	X1WFY2_DANRE	E7FH10_DANRE	A0A0R4IAC0_DANRE	A0A0G2KPF8_DANRE	A5PMX2_DANRE	A0A0R4IE73_DANRE	A0A2R8RXU6_DANRE	F8W600_DANRE	F8W2B2_DANRE
cellular_component	GO:0030127	COPII vesicle coat	14	24	0.583333	0.999979	0.000114049	1	0.041	PEF1_DANRE	SC23A_DANRE	KLH12_DANRE	SC31A_DANRE	Q6AZ98_DANRE	E7F114_DANRE	A0A0R4IAZ9_DANRE	A0A0R4ICL5_DANRE	A0A2R8QCB9_DANRE	F1R7W8_DANRE	F1QRB4_DANRE	A0A0R4IMX2_DANRE	A0A0R4IP34_DANRE	E7F715_DANRE
biological_process	GO:0007162	negative regulation of cell adhesion	14	27	0.518519	0.737813	0.333922	1	1	PLXA3_DANRE	RIPR2_DANRE	F1QBC0_DANRE	F1QZQ3_DANRE	A0A2R8PX85_DANRE	E7FGY1_DANRE	A0A2R8Q3J7_DANRE	Q5RH91_DANRE	F1Q7U0_DANRE	F1Q6L2_DANRE	F1R7J5_DANRE	B0V1S6_DANRE	A0A0R4IRZ9_DANRE	A0A140LGG1_DANRE
biological_process	GO:0006366	transcription by RNA polymerase II	14	47	0.297872	1	2.46574e-71	1	0	ERCC3_DANRE	NFIL3_DANRE	E7FGQ5_DANRE	Q66I03_DANRE	A0A2R8QPS2_DANRE	F1QY70_DANRE	F1R7W5_DANRE	A0A2R8QGW7_DANRE	A0A0R4IEG2_DANRE	F1QXN5_DANRE	A0A0R4IIR4_DANRE	F1R3R6_DANRE	Q5TYT6_DANRE	F1Q8L8_DANRE
biological_process	GO:0030866	cortical actin cytoskeleton organization	14	49	0.285714	0.986444	0.0260528	1	1	AMOL2_DANRE	DLG1_DANRE	A0A0R4IVY5_DANRE	Q68EI5_DANRE	Q90Y37_DANRE	F1Q6L5_DANRE	F1R3U2_DANRE	A0A0R4IHT4_DANRE	I3ITQ8_DANRE	A0A1D5NSW9_DANRE	E7F2A3_DANRE	F6P4R0_DANRE	A0A2R8QRD9_DANRE	A0A2R8QRY7_DANRE
biological_process	GO:1902476	chloride transmembrane transport	14	115	0.121739	0.00113417	0.999534	0.7	1	S12A9_DANRE	E9QC71_DANRE	Q568M9_DANRE	A0A2R8Q7A1_DANRE	E9QHL0_DANRE	A0A0R4IKC5_DANRE	E7FF59_DANRE	A0A2R8RJ22_DANRE	F1QHR2_DANRE	X1WED4_DANRE	A0A2R8RX62_DANRE	A0A2R8Q9T0_DANRE	F1R5T1_DANRE	F1R5A1_DANRE
cellular_component	GO:0010008	endosome membrane	14	76	0.184211	0.691423	0.35811	1	1	BECN1_DANRE	VAC14_DANRE	E7FBN6_DANRE	B7ZUU8_DANRE	F1RB27_DANRE	A0A0G2KGM8_DANRE	F1R354_DANRE	A0A0R4ITZ2_DANRE	A0A0R4IYK8_DANRE	F6PA07_DANRE	A0A2R8RJY3_DANRE	Q5RJ50_DANRE	F1R0S2_DANRE	E7EY00_DANRE
cellular_component	GO:0031965	nuclear membrane	14	48	0.291667	0.96746	0.0509233	1	1	TM201_DANRE	NUP42_DANRE	NUP85_DANRE	NSMF_DANRE	IRAG2_DANRE	NDC1_DANRE	A0A0R4IZD5_DANRE	B0S5I6_DANRE	A0A0R4IAQ8_DANRE	E7F981_DANRE	A0A0R4IBW5_DANRE	B0R0Z3_DANRE	H9GYN2_DANRE	E9QGM4_DANRE
biological_process	GO:0030433	ubiquitin-dependent ERAD pathway	14	96	0.145833	0.0631745	0.961688	1	1	TMUB1_DANRE	BAG6_DANRE	F1QW75_DANRE	Q7T3L3_DANRE	A0A0R4IBP3_DANRE	A0A0R4IUP8_DANRE	A0A286YAP4_DANRE	A0A2R8QDI1_DANRE	F1QIQ2_DANRE	E7F6E1_DANRE	F1QCS2_DANRE	E7FEA3_DANRE	F1Q5A9_DANRE	A0A2R8QN79_DANRE
biological_process	GO:0042632	cholesterol homeostasis	14	39	0.358974	0.968508	0.0648556	1	1	APOA1_DANRE	Q0II00_DANRE	Q7ZZT0_DANRE	E7FCW9_DANRE	F1QNG7_DANRE	E7FBZ6_DANRE	A0A2R8Q2J0_DANRE	A0A0R4IZV0_DANRE	A0A286YAF6_DANRE	F1QYL5_DANRE	Q5TZ29_DANRE	A0A2R8RJY5_DANRE	E9QGD4_DANRE	E7FBD3_DANRE
molecular_function	GO:0051082	unfolded protein binding	14	120	0.116667	0.00207536	0.999109	0.525	1	CD37L_DANRE	NACA_DANRE	F1QFC0_DANRE	Q7T3L3_DANRE	E7F6G9_DANRE	E7EZQ7_DANRE	A0A286YAP4_DANRE	A0A2R8Q3L5_DANRE	F1QYL2_DANRE	A0A2R8RRH1_DANRE	A0A2R8PZN5_DANRE	A0A2R8PZV9_DANRE	F1Q6G0_DANRE	A5PMG2_DANRE
cellular_component	GO:0035861	site of double-strand break	14	37	0.378378	0.992015	0.0198448	1	1	RNF8_DANRE	UFL1_DANRE	NHEJ1_DANRE	Q504I6_DANRE	A0A0R4ITV5_DANRE	A0A2R8QH82_DANRE	X1WGQ9_DANRE	B8A4B2_DANRE	E7F5C4_DANRE	A0A2R8RWF4_DANRE	B8A4B1_DANRE	E7F8G9_DANRE	A5PN27_DANRE	F8W2T2_DANRE
molecular_function	GO:0019903	protein phosphatase binding	14	28	0.5	0.999983	4.63254e-05	1	0.041	F1QTT3_DANRE	Q5RGI5_DANRE	A0A286YB73_DANRE	A5WVJ2_DANRE	F1QUV8_DANRE	F8W4M8_DANRE	A0A2R8QDB8_DANRE	A5WVJ0_DANRE	A0A2R8PZN4_DANRE	X1WD74_DANRE	X1WG48_DANRE	E7FC99_DANRE	F1Q753_DANRE	A0A0R4IFR5_DANRE
biological_process	GO:0032456	endocytic recycling	14	54	0.259259	0.931834	0.109948	1	1	K1109_DANRE	RFP4A_DANRE	RFIP3_DANRE	Q1LYA7_DANRE	F1QKS0_DANRE	A0A0R4IY52_DANRE	A0A0R4IIM0_DANRE	A0A286YAD0_DANRE	A0A0R4IPW9_DANRE	F1R0A4_DANRE	F1RDJ8_DANRE	F6NKU7_DANRE	E7EY00_DANRE	A0A0R4IB90_DANRE
biological_process	GO:0048840	otolith development	14	43	0.325581	0.541898	0.559871	1	1	HN1BA_DANRE	WNT5B_DANRE	DLX3B_DANRE	F1QNU4_DANRE	Q90XD1_DANRE	Q6DBY3_DANRE	F1QH90_DANRE	E9QJ32_DANRE	A0A2R8PZJ4_DANRE	A0A1D5NS53_DANRE	A0A140LG62_DANRE	A0A140LFR2_DANRE	F1QK57_DANRE	F1QGL1_DANRE
molecular_function	GO:0005112	Notch binding	14	30	0.466667	0.999199	0.00274276	1	0.929	EYS_DANRE	NOTC1_DANRE	DLLC_DANRE	JAG1A_DANRE	E7F2S5_DANRE	A0A2R8Q7E4_DANRE	F1RCH4_DANRE	A0A2R8QH43_DANRE	F1QP77_DANRE	B8JKQ5_DANRE	A0A2R8QKW3_DANRE	Q5SPB5_DANRE	F1QZF2_DANRE	A0A2R8Q5T2_DANRE
biological_process	GO:0000165	MAPK cascade	14	65	0.215385	0.00316747	0.997772	0.954	1	X1WGA8_DANRE	A0A0R4IEP9_DANRE	A0A0R4IIN0_DANRE	B0UY93_DANRE	E7F885_DANRE	A0A0R4IP53_DANRE	A0A2R8QUH6_DANRE	X1WD79_DANRE	A0A2R8RPD7_DANRE	A0A0R4IJH5_DANRE	F6NUK2_DANRE	E9QBC8_DANRE	A0A0R4IVF8_DANRE	A0A0R4IWP5_DANRE
cellular_component	GO:0005884	actin filament	14	83	0.168675	0.812983	0.240559	1	1	Q1L8E6_DANRE	E7F517_DANRE	X1WC43_DANRE	F1R4L5_DANRE	F1Q6U7_DANRE	Q29RF4_DANRE	F1QCE2_DANRE	A5PM88_DANRE	A0A2R8QAK8_DANRE	A0A2R8PYS8_DANRE	F8W4R4_DANRE	A0A2R8QNL1_DANRE	A0A2R8RSF3_DANRE	F1Q515_DANRE
cellular_component	GO:0042734	presynaptic membrane	14	45	0.311111	0.999886	0.000255467	1	0.094	P4K2A_DANRE	F1QVH9_DANRE	F1R275_DANRE	A0A2R8Q4Y5_DANRE	F1RCJ3_DANRE	F1R0Z6_DANRE	E9QHR1_DANRE	F1QVX7_DANRE	A0A2R8QCE0_DANRE	A0A0G2L109_DANRE	A0A0R4IIE4_DANRE	A0A2R8PZY5_DANRE	A0A2R8QGT9_DANRE	A0A2R8QE86_DANRE
cellular_component	GO:0005819	spindle	14	101	0.138614	0.967863	0.0438626	1	1	Q7ZVN3_DANRE	E7FG55_DANRE	A0A2R8QNV1_DANRE	R4GEM8_DANRE	E9QFU9_DANRE	A0A2R8PWK7_DANRE	F1QWH7_DANRE	E7F728_DANRE	A0A0R4IBB9_DANRE	A0A2R8Q094_DANRE	F8W600_DANRE	F8W5R0_DANRE	F1RAK1_DANRE	F8W2B2_DANRE
molecular_function	GO:0050661	NADP binding	14	65	0.215385	0.155852	0.902271	1	1	GLYR1_DANRE	Q5TZD3_DANRE	A2BIN8_DANRE	Q7T1D7_DANRE	F1QS99_DANRE	F6NN73_DANRE	F1Q7F3_DANRE	E7FGA5_DANRE	A0A2R8RQT4_DANRE	A0A0R4IMF9_DANRE	A0A2R8RSR5_DANRE	A0A2R8Q1W8_DANRE	A0A140LH37_DANRE	F1QML0_DANRE
molecular_function	GO:0000166	nucleotide binding	14	74	0.189189	0.00783557	0.992951	0.958	1	DHDH_DANRE	RMI1_DANRE	IMDH3_DANRE	Q7T3F9_DANRE	F1R3F9_DANRE	Q6PBZ7_DANRE	A0A0R4IVW4_DANRE	B0V351_DANRE	F1Q5Q7_DANRE	F1RC54_DANRE	Q5RGV0_DANRE	E7FDC5_DANRE	F1QSQ9_DANRE	A0A2R8PX42_DANRE
biological_process	GO:0071456	cellular response to hypoxia	14	26	0.538462	0.99929	0.00252544	1	0.981	B3DJD1_DANRE	F1QNB9_DANRE	A0A2R8QM70_DANRE	F1Q5G1_DANRE	A0A0R4IB28_DANRE	A0A2R8QV03_DANRE	F6P6J7_DANRE	E7F518_DANRE	A0A0R4IBR4_DANRE	A0A2R8QI31_DANRE	E7F4P8_DANRE	F8W2W5_DANRE	F1QEA3_DANRE	E7FAJ1_DANRE
biological_process	GO:0039021	pronephric glomerulus development	14	26	0.538462	0.998495	0.00388773	1	1	X1WG80_DANRE	Q9PUT7_DANRE	B0CM22_DANRE	A4FTT4_DANRE	A0A2R8Q8D8_DANRE	F1Q897_DANRE	A0A2R8QJF4_DANRE	A0A2R8RKI9_DANRE	Q5VSD9_DANRE	A0A2R8PV45_DANRE	A0A2R8QBW2_DANRE	A0A2R8QD15_DANRE	A4FTT3_DANRE	A0A0R4IT86_DANRE
biological_process	GO:0000070	mitotic sister chromatid segregation	14	31	0.451613	0.99661	0.00569303	1	1	A0A2R8Q9M3_DANRE	A2BG39_DANRE	A1L231_DANRE	F1QJY8_DANRE	A0A2R8PZ20_DANRE	A0A0R4IHW6_DANRE	E7FD92_DANRE	B8A4V4_DANRE	A0A2R8Q4V9_DANRE	A0A2R8PZ46_DANRE	B8JK99_DANRE	B0UYN0_DANRE	A0A0R4IRW7_DANRE	B0V123_DANRE
molecular_function	GO:0001786	phosphatidylserine binding	14	61	0.229508	0.617054	0.502929	1	1	B8JHS1_DANRE	A0A2R8QRH1_DANRE	E7FEZ0_DANRE	A0A2R8RWI1_DANRE	I3IS33_DANRE	R4GE71_DANRE	E9QIC8_DANRE	B8JHS0_DANRE	A0A2R8RLT5_DANRE	U3JA52_DANRE	A0A2R8RS78_DANRE	X1WDZ6_DANRE	A0A2R8RVP9_DANRE	E7F8R8_DANRE
biological_process	GO:0030833	regulation of actin filament polymerization	14	60	0.233333	0.956441	0.0572114	1	1	Q6GMH1_DANRE	A9JRP8_DANRE	A0A2R8Q4Q1_DANRE	F1Q932_DANRE	A0A2R8RVZ9_DANRE	A0A2R8RMN7_DANRE	X1WBC3_DANRE	E7EXG2_DANRE	Q1LWS2_DANRE	F1QIB3_DANRE	A0A2R8Q4E3_DANRE	E7F5Q5_DANRE	A0A0R4I9Q9_DANRE	E7F192_DANRE
biological_process	GO:0000289	nuclear-transcribed mRNA poly(A) tail shortening	14	21	0.666667	1	5.0965e-11	1	0	E9QJN4_DANRE	E7FGM4_DANRE	A4QN63_DANRE	A0A0R4IJ26_DANRE	Q1LUD8_DANRE	A0A2R8QG59_DANRE	E9QE21_DANRE	E9QGK5_DANRE	X1WG96_DANRE	E9QCV7_DANRE	E7EXP6_DANRE	F1Q4L8_DANRE	E7F857_DANRE	E7FBA1_DANRE
biological_process	GO:0016358	dendrite development	14	37	0.378378	0.997406	0.00473058	1	1	A0A2R8QI85_DANRE	X1WDB0_DANRE	A0A140LH51_DANRE	Q5BJ09_DANRE	B2ZZ14_DANRE	F1Q828_DANRE	A0A2R8QJ64_DANRE	A0A0G2KXQ3_DANRE	A0A1D5NSB6_DANRE	A0A0R4ISC3_DANRE	F1R4P6_DANRE	A0A140LGY7_DANRE	F1R9B8_DANRE	E7EZD1_DANRE
cellular_component	GO:0032588	trans-Golgi network membrane	14	32	0.4375	0.998532	0.00460408	1	0.832	Q567G5_DANRE	Q6P0B3_DANRE	Q7SYK6_DANRE	Q5XIZ7_DANRE	R4GEF6_DANRE	R4GEJ9_DANRE	F6NI22_DANRE	F1Q8M3_DANRE	F1RAR6_DANRE	I3ISN1_DANRE	B8JLD1_DANRE	F1QJ24_DANRE	E9QBT3_DANRE	E7F390_DANRE
biological_process	GO:0045197	establishment or maintenance of epithelial cell apical/basal polarity	14	51	0.27451	0.46961	0.643484	1	1	SCRIB_DANRE	PAL1A_DANRE	DLG1_DANRE	B7ZVK8_DANRE	O93616_DANRE	Q1L927_DANRE	E7EYJ7_DANRE	F1QCA7_DANRE	A0A2R8QCM5_DANRE	E7F9G8_DANRE	F1QPF0_DANRE	A0A0R4IEU0_DANRE	A0A0R4IBP9_DANRE	A5WUN6_DANRE
biological_process	GO:0034063	stress granule assembly	14	20	0.7	0.999994	4.18864e-05	1	0.081	YTHD2_DANRE	Q6P0B2_DANRE	E7F1G8_DANRE	F1QA42_DANRE	E7FD91_DANRE	A0A2R8QB57_DANRE	A2CF31_DANRE	F1QIS2_DANRE	A0A0R4IVM1_DANRE	A0A2R8S0C3_DANRE	A0A2R8RND2_DANRE	A0A2R8PWZ8_DANRE	A0A0R4IQ37_DANRE	A0A2R8QG13_DANRE
cellular_component	GO:0034993	meiotic nuclear membrane microtubule tethering complex	14	28	0.5	0.999762	0.000952864	1	0.321	E7EZ30_DANRE	R4GDU6_DANRE	F1R4S0_DANRE	F1RAC6_DANRE	F1Q6N7_DANRE	E7FGG7_DANRE	E7EZV6_DANRE	F1R1L9_DANRE	X1WGA9_DANRE	F8W2N1_DANRE	X1WHH7_DANRE	E7FB83_DANRE	A0A2R8Q9A2_DANRE	R4GE14_DANRE
biological_process	GO:0014059	regulation of dopamine secretion	14	57	0.245614	0.608851	0.512665	1	1	Q8AWE0_DANRE	Q7T1A1_DANRE	F1R1L1_DANRE	F1QG18_DANRE	A0A2R8RWI1_DANRE	I3IS33_DANRE	X1WBR1_DANRE	U3JA52_DANRE	A0A2R8RS78_DANRE	A0A2R8Q6N5_DANRE	F1QQR5_DANRE	X1WDZ6_DANRE	A0A2R8RVP9_DANRE	E7F8R8_DANRE
molecular_function	GO:0005251	delayed rectifier potassium channel activity	14	67	0.208955	0.457408	0.657157	1	1	A0A2R8Q685_DANRE	A0A0R4ISS8_DANRE	A0A2R8QPN6_DANRE	F1RB62_DANRE	X1WCE7_DANRE	E0R7P9_DANRE	A0A2R8QAI6_DANRE	A0A2R8QSA8_DANRE	A0A2R8QRP8_DANRE	A0A2R8QD79_DANRE	F1QCW6_DANRE	A0A2R8Q9T9_DANRE	A0A2R8QLG2_DANRE	A0A2R8QUS8_DANRE
biological_process	GO:0006958	complement activation, classical pathway	14	80	0.175	0.0954001	0.943998	1	1	F1Q611_DANRE	Q6PFT2_DANRE	F1RAV1_DANRE	F1QM47_DANRE	M9MMG2_DANRE	E9QGS7_DANRE	M9MMF8_DANRE	M9MMF9_DANRE	A0A2R8RNG3_DANRE	M9MMD8_DANRE	A0A2R8Q323_DANRE	E9QB99_DANRE	A0A2R8Q5A9_DANRE	M9MMF2_DANRE
molecular_function	GO:0005242	inward rectifier potassium channel activity	14	52	0.269231	0.768688	0.336908	1	1	E7FGH1_DANRE	B3DJX4_DANRE	I3ITL7_DANRE	A0A2R8QD65_DANRE	E9QJ94_DANRE	E7F7K0_DANRE	A0A2R8Q8L4_DANRE	A0A2R8Q5N6_DANRE	E7F7K8_DANRE	A0A2R8Q8A5_DANRE	A0A0G2KRC3_DANRE	F1QIE6_DANRE	E7FD27_DANRE	B0V138_DANRE
molecular_function	GO:0008574	plus-end-directed microtubule motor activity	14	35	0.4	0.994651	0.0141193	1	1	A0A2R8RQW0_DANRE	F1RCT7_DANRE	E7F0X8_DANRE	A0A2R8Q7G1_DANRE	F1QET8_DANRE	E9QC56_DANRE	B0UYK4_DANRE	A0A0R4IM96_DANRE	X1WFY5_DANRE	F1R7B6_DANRE	E7F2U4_DANRE	A0A0R4ILH1_DANRE	F1R5M2_DANRE	F1QK82_DANRE
molecular_function	GO:0030506	ankyrin binding	14	16	0.875	1	5.6879e-08	1	0	A0A2R8PZA9_DANRE	A0A0R4IJ71_DANRE	A5WV02_DANRE	A0A2R8QKW7_DANRE	A0A2R8QR17_DANRE	A0A0R4INC4_DANRE	E9QCV2_DANRE	A0A2R8QEG3_DANRE	A0A2R8QLG6_DANRE	A0A2R8PVX9_DANRE	E7F8G7_DANRE	A0A286YBE9_DANRE	A0A2R8RIJ1_DANRE	E7F4T0_DANRE
molecular_function	GO:0051371	muscle alpha-actinin binding	13	48	0.270833	0.833842	0.261563	1	1	F1QGX8_DANRE	Q4ZGL5_DANRE	Q4ZGL0_DANRE	F1QSU4_DANRE	Q4ZGK9_DANRE	F1R1G8_DANRE	A0A2R8QM62_DANRE	F1QU51_DANRE	F1R6X2_DANRE	A0A2R8Q829_DANRE	A0A2R8QJ58_DANRE	F1QN07_DANRE	F1QT83_DANRE
molecular_function	GO:0004722	protein serine/threonine phosphatase activity	13	49	0.265306	0.00740031	0.996013	0.95	1	CC14A_DANRE	Q7ZVN3_DANRE	A2BE49_DANRE	A3KP70_DANRE	F1R3T2_DANRE	A0A2R8QH09_DANRE	A0A0G2KPF8_DANRE	E7EY20_DANRE	X1WGE6_DANRE	F8W600_DANRE	F8W5R0_DANRE	A0A2R8RV93_DANRE	F8W2B2_DANRE
cellular_component	GO:0002116	semaphorin receptor complex	13	26	0.5	0.999641	0.00144435	1	0.407	PLXA3_DANRE	F1QBC0_DANRE	F1QZQ3_DANRE	A0A2R8PX85_DANRE	E7FGY1_DANRE	A0A2R8Q3J7_DANRE	Q5RH91_DANRE	F1Q7U0_DANRE	F1Q6L2_DANRE	F1R7J5_DANRE	B0V1S6_DANRE	A0A0R4IRZ9_DANRE	A0A140LGG1_DANRE
biological_process	GO:1902287	semaphorin-plexin signaling pathway involved in axon guidance	13	26	0.5	0.999002	0.0035792	1	1	PLXA3_DANRE	F1QBC0_DANRE	F1QZQ3_DANRE	A0A2R8PX85_DANRE	E7FGY1_DANRE	A0A2R8Q3J7_DANRE	Q5RH91_DANRE	F1Q7U0_DANRE	F1Q6L2_DANRE	F1R7J5_DANRE	B0V1S6_DANRE	A0A0R4IRZ9_DANRE	A0A140LGG1_DANRE
biological_process	GO:0003146	heart jogging	13	52	0.25	0.714353	0.389148	1	1	DAAF1_DANRE	CCD40_DANRE	NPHP3_DANRE	COBL_DANRE	NIPLA_DANRE	TBX5A_DANRE	NKD1_DANRE	E3W6T6_DANRE	B0V0H4_DANRE	G1K2W9_DANRE	F1QAD6_DANRE	F8W4Z3_DANRE	A0A0R4IWH7_DANRE
biological_process	GO:0070936	protein K48-linked ubiquitination	13	36	0.361111	0.966338	0.0705271	1	1	RN152_DANRE	HACE1_DANRE	RNF8_DANRE	F1QKD6_DANRE	U6C7X6_DANRE	A0A2R8QHS6_DANRE	F1RCH2_DANRE	E7F5S3_DANRE	A4QN36_DANRE	X1WG81_DANRE	F1QFN6_DANRE	A0A0R4IBD8_DANRE	F1QYQ0_DANRE
biological_process	GO:0006367	transcription initiation from RNA polymerase II promoter	13	37	0.351351	0.956523	0.0761488	1	1	TAF8_DANRE	ERCC3_DANRE	TAF2_DANRE	F2Z4T1_DANRE	Q5PNQ6_DANRE	F1QMF8_DANRE	A0A2R8Q2H6_DANRE	F1R685_DANRE	Q5TYT6_DANRE	E7FFQ2_DANRE	A0A2R8PXU1_DANRE	E7FBZ0_DANRE	A0A2R8QB19_DANRE
biological_process	GO:0046856	phosphatidylinositol dephosphorylation	13	83	0.156627	0.0442772	0.976568	1	1	MTMRC_DANRE	SAC2_DANRE	SHP2A_DANRE	A0A0R4IB77_DANRE	A0A0R4IVI6_DANRE	A0A0R4IZV3_DANRE	A0A2R8RTQ9_DANRE	E7F7E6_DANRE	A0A0R4IDR8_DANRE	A0A2R8RLL8_DANRE	A0A0R4IFR5_DANRE	F1QTP6_DANRE	F1QFI4_DANRE
biological_process	GO:0009966	regulation of signal transduction	13	71	0.183099	0.998173	0.00214326	1	0.972	NCLN_DANRE	MELT_DANRE	A8WG10_DANRE	F1QVP4_DANRE	B3DIT8_DANRE	A0A0R4IFZ1_DANRE	E9QE56_DANRE	A0A2R8RV71_DANRE	A0A2R8Q5E6_DANRE	A0A2R8QKB4_DANRE	A0A0G2L863_DANRE	A0A2R8RUG7_DANRE	E7FAZ0_DANRE
biological_process	GO:0006874	cellular calcium ion homeostasis	13	101	0.128713	2.84072e-08	1	0	1	B7ZVL5_DANRE	F1R6G6_DANRE	B8JIC5_DANRE	A0A0R4IAT9_DANRE	A0A0R4INT7_DANRE	Q1LY88_DANRE	A0A2R8RIM0_DANRE	A0A2R8PZL7_DANRE	F1RC75_DANRE	A5WW41_DANRE	F1QLT2_DANRE	A0A2R8QKM0_DANRE	E9QFK0_DANRE
cellular_component	GO:0005875	microtubule associated complex	13	20	0.65	1	2.19257e-12	1	0	A0A2R8QI85_DANRE	X1WDB0_DANRE	F1R0W9_DANRE	A0A140LH51_DANRE	B2ZZ14_DANRE	F1Q828_DANRE	A0A2R8QJ64_DANRE	F6PC33_DANRE	A0A0R4ISC3_DANRE	A0A2R8RP20_DANRE	A0A286YA27_DANRE	A0A0R4IW36_DANRE	A0A140LGY7_DANRE
biological_process	GO:0000132	establishment of mitotic spindle orientation	13	35	0.371429	0.973777	0.0572146	1	1	SCRIB_DANRE	B0UYB0_DANRE	F1R0W9_DANRE	A0A2R8RI11_DANRE	F6PC33_DANRE	F1Q6J9_DANRE	F1QVN7_DANRE	A0A2R8QRB2_DANRE	A0A2R8RP20_DANRE	A0A286YA27_DANRE	A0A2R8QDU7_DANRE	A0A0R4IW36_DANRE	F1QFD6_DANRE
biological_process	GO:0006368	transcription elongation from RNA polymerase II promoter	13	30	0.433333	0.960388	0.0712836	1	1	SPT6H_DANRE	LEO1_DANRE	PAF1_DANRE	SPT5H_DANRE	Q7T3D4_DANRE	Q6PEG4_DANRE	A0A2R8Q436_DANRE	A0A2R8RHU4_DANRE	F1RAF7_DANRE	X1WHN7_DANRE	A8DZ67_DANRE	A0A2R8RXT0_DANRE	A0A0R4IFZ2_DANRE
biological_process	GO:0007492	endoderm development	13	35	0.371429	0.999194	0.00165254	1	0.946	YAP1_DANRE	MED12_DANRE	Q9W6U0_DANRE	B6IDE3_DANRE	Q98873_DANRE	F1Q633_DANRE	Q5TYX1_DANRE	A0A2R8QFB7_DANRE	A0A2R8Q1V0_DANRE	A2BHG4_DANRE	A0A0R4IQJ3_DANRE	A0A2R8QSM6_DANRE	A0A2R8QDV4_DANRE
cellular_component	GO:0071565	nBAF complex	13	34	0.382353	0.991259	0.0222496	1	1	Q802C8_DANRE	A0A2R8RV42_DANRE	A0A0R4IR17_DANRE	F6NVB1_DANRE	F8W4A9_DANRE	E7FFZ4_DANRE	A0A0R4IVD0_DANRE	A0A0R4ISW4_DANRE	A0A2R8QFG7_DANRE	Q5RGW7_DANRE	A0A0R4IKJ3_DANRE	A0A2R8RJE4_DANRE	A0A0R4IDE0_DANRE
biological_process	GO:0031297	replication fork processing	13	26	0.5	0.985467	0.0336616	1	1	SMAL1_DANRE	MMS22_DANRE	TONSL_DANRE	F1Q905_DANRE	E7EXE0_DANRE	A0A2R8RXE4_DANRE	A0A2R8PYQ8_DANRE	A0A2R8Q619_DANRE	A0A0R4IDC2_DANRE	A0A2R8RHK4_DANRE	A0A2R8QU85_DANRE	A0A2R8Q8U6_DANRE	R4GDY2_DANRE
biological_process	GO:0043049	otic placode formation	13	34	0.382353	0.97993	0.0457033	1	1	STM_DANRE	HN1BA_DANRE	PAX2A_DANRE	DLX3B_DANRE	DLX4B_DANRE	Q6NYI3_DANRE	Q9DFH2_DANRE	A0A2R8RSI4_DANRE	Q6P975_DANRE	F1Q9Q9_DANRE	F1QUT5_DANRE	F1QUT4_DANRE	A0A2R8QRQ5_DANRE
biological_process	GO:0031099	regeneration	13	33	0.393939	0.147626	0.881038	1	1	SOX2_DANRE	NDF1_DANRE	Q1L8A5_DANRE	O93599_DANRE	Q6NV46_DANRE	A0A1S6L757_DANRE	A0A0R4IGF2_DANRE	X1WFI8_DANRE	A0A0R4J6S2_DANRE	E7F3F7_DANRE	X1WF98_DANRE	E7FG81_DANRE	I3IT32_DANRE
biological_process	GO:0048264	determination of ventral identity	13	36	0.361111	0.966338	0.0705271	1	1	Q8JFB0_DANRE	F1R7N7_DANRE	A0A2R8QRK0_DANRE	F1Q5T5_DANRE	F1R5Z7_DANRE	A0A286YBQ8_DANRE	A0A0R4IQK3_DANRE	A8DZ85_DANRE	F1QFK4_DANRE	F1QAD6_DANRE	F1QS48_DANRE	F1QH44_DANRE	A0A2R8PZ52_DANRE
biological_process	GO:0098962	regulation of postsynaptic neurotransmitter receptor activity	13	19	0.684211	0.999993	5.287e-05	1	0.095	DLGP1_DANRE	E7F6K9_DANRE	E7FAC5_DANRE	A0A0R4ITW6_DANRE	A0A0R4IQW1_DANRE	F8W2U4_DANRE	E7F7X5_DANRE	Q1L8T7_DANRE	F1QWU9_DANRE	F1R3Y1_DANRE	X1WG76_DANRE	A0A0R4IVK0_DANRE	A0A2R8Q3D0_DANRE
biological_process	GO:0035845	photoreceptor cell outer segment organization	13	43	0.302326	0.870188	0.215224	1	1	KIF7_DANRE	EYS_DANRE	TALD3_DANRE	A0A0G2LAC3_DANRE	A0A2R8QB34_DANRE	E7EXH4_DANRE	F1QX08_DANRE	E7F3T4_DANRE	A0A2R8QEZ0_DANRE	F8W3V6_DANRE	A0A286Y8M8_DANRE	F8W4S4_DANRE	E9QHV7_DANRE
biological_process	GO:0030901	midbrain development	13	41	0.317073	0.945075	0.101341	1	1	OTX2_DANRE	WDR73_DANRE	MED12_DANRE	PAX2A_DANRE	CHD8_DANRE	Q6VUB8_DANRE	A9ZMG5_DANRE	B3IWJ8_DANRE	Q1LYC2_DANRE	A0A0R4IIN0_DANRE	A0A0R4IJH5_DANRE	F1R1I4_DANRE	E7F1L8_DANRE
biological_process	GO:0036269	swimming behavior	13	50	0.26	0.696824	0.424409	1	1	MY9AB_DANRE	E7F0B3_DANRE	Q1LYM8_DANRE	F1QJ05_DANRE	F1QCQ3_DANRE	F1QBX1_DANRE	E7EYF2_DANRE	E7F1U4_DANRE	E9QHX3_DANRE	A0A2R8Q244_DANRE	E7EXM8_DANRE	A0A0H2UKL6_DANRE	F1R072_DANRE
molecular_function	GO:0030971	receptor tyrosine kinase binding	13	42	0.309524	0.971017	0.055879	1	1	Q1LWR7_DANRE	A0A0R4IEK8_DANRE	A0A2R8Q779_DANRE	Q1MT43_DANRE	F1Q5B6_DANRE	E7FAP8_DANRE	A0A0R4IXV0_DANRE	A0A0R4IMG6_DANRE	Q1LX18_DANRE	F1Q742_DANRE	F1R6A7_DANRE	A0A0G2L4Z6_DANRE	X1WC45_DANRE
molecular_function	GO:0043138	3'-5' DNA helicase activity	13	25	0.52	0.999736	0.00111762	1	0.561	ERCC3_DANRE	ASCC3_DANRE	A0A0R4IHR6_DANRE	E7F8R0_DANRE	A0A2R8QQ92_DANRE	A0A0G2KI26_DANRE	A0A2R8Q619_DANRE	A0A2R8RHK4_DANRE	A0A0R4IT14_DANRE	A0A2R8QU85_DANRE	A0A2R8Q8U6_DANRE	B0S6Z1_DANRE	A0A2R8QA21_DANRE
molecular_function	GO:0004715	non-membrane spanning protein tyrosine kinase activity	13	94	0.138298	0.0270506	0.986266	1	1	JAK1_DANRE	F1Q6A2_DANRE	F8W5D1_DANRE	A0A2R8QJ02_DANRE	A0A2R8Q7T0_DANRE	F1R5C7_DANRE	F1R3M1_DANRE	X1WHN6_DANRE	B0V237_DANRE	F8W425_DANRE	A0A0R4ICU5_DANRE	A0A2R8RWH2_DANRE	F8W4H3_DANRE
biological_process	GO:0030705	cytoskeleton-dependent intracellular transport	13	34	0.382353	1	3.07396e-09	1	0	DAPLE_DANRE	HOOK1_DANRE	F1QPU7_DANRE	A0A0R4IZI6_DANRE	F1QIY3_DANRE	E7F624_DANRE	B0UYK4_DANRE	A0A2R8RPV5_DANRE	A0A2R8Q3V4_DANRE	E7FGH9_DANRE	E7FFM0_DANRE	F1R5M2_DANRE	F1Q8U0_DANRE
biological_process	GO:0006909	phagocytosis	13	45	0.288889	4.15751e-05	0.999982	0.04	1	K1109_DANRE	TYRO3_DANRE	F1QY34_DANRE	A0A286YAI0_DANRE	A0A2R8PYK8_DANRE	E7EYX4_DANRE	X1WBN8_DANRE	F1QWE3_DANRE	F1QU19_DANRE	B8JME4_DANRE	X1WHG6_DANRE	A0A1D5NT23_DANRE	A0A0H2UKL4_DANRE
cellular_component	GO:0019005	SCF ubiquitin ligase complex	13	112	0.116071	0.00388556	0.998305	0.576	1	FBXL5_DANRE	A0A0R4IWI4_DANRE	A0A2R8RVN4_DANRE	A0A2R8RR75_DANRE	F1QYZ2_DANRE	A0A2R8PXD1_DANRE	A0A0R4IE49_DANRE	A0A2R8S0B5_DANRE	E7F5P0_DANRE	F1QWZ2_DANRE	B8K0E7_DANRE	A0A2R8QN79_DANRE	A0A2R8RJ46_DANRE
biological_process	GO:0006396	RNA processing	13	53	0.245283	6.4294e-07	1	0	1	CLP1_DANRE	B7ZVL5_DANRE	F1RC56_DANRE	Q6ZM52_DANRE	E7F071_DANRE	F1QYC8_DANRE	F6P6I4_DANRE	A8B8W4_DANRE	A0A2R8PZL7_DANRE	F1R076_DANRE	A0A0R4I9B6_DANRE	F1RC75_DANRE	Q1L9A1_DANRE
biological_process	GO:0034446	substrate adhesion-dependent cell spreading	13	72	0.180556	0.270218	0.810217	1	1	A0A286Y9M1_DANRE	A0A2R8RLV5_DANRE	F1QPJ1_DANRE	Q1MTD2_DANRE	F1QYU0_DANRE	E7EXX6_DANRE	F1R1J6_DANRE	A0A2R8Q880_DANRE	F1QL76_DANRE	A0A2R8QMV5_DANRE	F1REL9_DANRE	E7F1Y0_DANRE	E7F6C7_DANRE
molecular_function	GO:0070577	lysine-acetylated histone binding	13	26	0.5	0.999546	0.00178121	1	0.698	BRDT_DANRE	BRD4_DANRE	PSM4A_DANRE	PSM4B_DANRE	A0A2R9YJG8_DANRE	T1ECT6_DANRE	A0A0R4IAF6_DANRE	F1QE31_DANRE	E7F3R5_DANRE	F8W2E9_DANRE	A0A0A0MPN8_DANRE	F1QQP6_DANRE	F8W3C9_DANRE
cellular_component	GO:0045121	membrane raft	13	70	0.185714	0.0186738	0.989702	0.985	1	P4K2A_DANRE	SMUF2_DANRE	Q5RHU2_DANRE	B5DDZ4_DANRE	F1R376_DANRE	A0A0R4IC48_DANRE	A8E7C6_DANRE	F1Q5B6_DANRE	F1RD89_DANRE	A0A2R8QSL0_DANRE	F1Q742_DANRE	F1R6A7_DANRE	E7FBY0_DANRE
cellular_component	GO:0005811	lipid droplet	13	58	0.224138	0.614508	0.509685	1	1	TRAF6_DANRE	R213A_DANRE	R213B_DANRE	A0A2R8QG12_DANRE	F1QWT0_DANRE	A0A2R8QRU7_DANRE	A0A0R4IKT5_DANRE	E9QB86_DANRE	F1RAS0_DANRE	Q5RHQ4_DANRE	B0S5M5_DANRE	A0A0R4IXX7_DANRE	A0A286Y831_DANRE
biological_process	GO:0060395	SMAD protein signal transduction	13	70	0.185714	0.177601	0.889053	1	1	Q68IN2_DANRE	E7FFZ5_DANRE	Q9W6I6_DANRE	F1R5Z7_DANRE	A0A2R8RLC3_DANRE	A0A0G2KD75_DANRE	Q1L8R8_DANRE	F1QWZ9_DANRE	A0A0G2KKG9_DANRE	F1QAD6_DANRE	F1RC55_DANRE	F8W4A6_DANRE	F1QS48_DANRE
cellular_component	GO:0044666	MLL3/4 complex	13	26	0.5	0.999641	0.00144435	1	0.407	A0A2R8Q8I0_DANRE	F1R3T7_DANRE	A0A2R8QF67_DANRE	A0A1D5NSI1_DANRE	E9QG91_DANRE	F1Q597_DANRE	A0A2R8RNH4_DANRE	E7F1D2_DANRE	F1R598_DANRE	A0A0R4IM21_DANRE	E7F2F7_DANRE	F1Q6F2_DANRE	F6PBE4_DANRE
biological_process	GO:0090504	epiboly	13	39	0.333333	0.939924	0.0866201	1	1	PO5F1_DANRE	Q98TU2_DANRE	A5JNG8_DANRE	Q9W6E3_DANRE	A0A2R8Q685_DANRE	A0A2R8QPN6_DANRE	F6NTT0_DANRE	X1WCE7_DANRE	A0A2R8QSA8_DANRE	A0A2R8QRP8_DANRE	F1Q7S5_DANRE	A0A2R8Q9T9_DANRE	A0A2R8QLG2_DANRE
cellular_component	GO:0016281	eukaryotic translation initiation factor 4F complex	13	31	0.419355	0.996768	0.00951764	1	0.98	B8JL46_DANRE	A0A2R8RSJ5_DANRE	A0A140LGN9_DANRE	F1QX94_DANRE	A0A0R4IFW9_DANRE	A3KQB2_DANRE	A0A2R8QL84_DANRE	A0A286YA82_DANRE	B8JL45_DANRE	A0A0R4IBA9_DANRE	F1R101_DANRE	A0A2R8Q280_DANRE	E7EYD8_DANRE
biological_process	GO:0035278	miRNA-mediated gene silencing by inhibition of translation	13	18	0.722222	0.999998	2.1433e-05	1	0.043	E7FGM4_DANRE	E7F923_DANRE	A0A0R4IJ26_DANRE	A0A2R8RP64_DANRE	F1QRP4_DANRE	A0A2R8RPF4_DANRE	A0A2R8RQW3_DANRE	I3IRW6_DANRE	U3JAU2_DANRE	A0A286YB96_DANRE	A0A2R8S0G2_DANRE	E7F055_DANRE	E7F339_DANRE
molecular_function	GO:0032266	phosphatidylinositol-3-phosphate binding	13	38	0.342105	0.969955	0.0634822	1	1	VPS36_DANRE	LST2_DANRE	A0A0R4IIM0_DANRE	A0A2R8QPX7_DANRE	A0A0R4IKT5_DANRE	F1RDJ8_DANRE	E9QH92_DANRE	H0WEH6_DANRE	E9QGR9_DANRE	A0A0R4IXX7_DANRE	F1QWA6_DANRE	F1QFF9_DANRE	F1R8A2_DANRE
biological_process	GO:0055002	striated muscle cell development	13	28	0.464286	0.905042	0.12297	1	1	B0S6T1_DANRE	F1R7V2_DANRE	F1QDK4_DANRE	A0A140LGX4_DANRE	F8W4Q7_DANRE	F1R0H8_DANRE	A0A0R4IXX0_DANRE	F1R3L1_DANRE	A0A0R4IF13_DANRE	A0A2R8QMX9_DANRE	F1QXP9_DANRE	F1QC58_DANRE	A0A140LFP0_DANRE
molecular_function	GO:0052742	phosphatidylinositol kinase activity	13	23	0.565217	0.999997	1.9156e-05	1	0.014	PI4KB_DANRE	A9JRB4_DANRE	F1QAD7_DANRE	F1RCP0_DANRE	A0A2R8Q031_DANRE	B0V3R8_DANRE	A0A2R8QSP1_DANRE	A0A0G2L6J0_DANRE	F1Q9F3_DANRE	Q1L913_DANRE	F1RB17_DANRE	F8W4V1_DANRE	F6NMW9_DANRE
biological_process	GO:0006919	activation of cysteine-type endopeptidase activity involved in apoptotic process	13	35	0.371429	0.9605	0.0785086	1	1	E7EXV8_DANRE	A0A0R4IKR8_DANRE	F1QD18_DANRE	X1WBM9_DANRE	X1WGL1_DANRE	F1R6L2_DANRE	A0A0R4ITB0_DANRE	A0A2R8RNP3_DANRE	F1Q7E9_DANRE	A0A0R4IW08_DANRE	A0A0R4IJE4_DANRE	A0A2R8QJ16_DANRE	A0A2R8QB02_DANRE
biological_process	GO:0021954	central nervous system neuron development	13	29	0.448276	0.952999	0.0720448	1	1	SPT5H_DANRE	PAL1A_DANRE	MED12_DANRE	Q803E3_DANRE	E7F9D4_DANRE	Q4QRG0_DANRE	A0A0B4J1A5_DANRE	A0A286Y8P6_DANRE	F1QM38_DANRE	E9QEH8_DANRE	B7ZDE9_DANRE	A0A0R4IRM2_DANRE	A5PMS7_DANRE
cellular_component	GO:0009925	basal plasma membrane	13	28	0.464286	0.719359	0.350838	1	1	XPO2_DANRE	F1R5S1_DANRE	F8W3W7_DANRE	E7FD22_DANRE	F1QDE6_DANRE	F1QP50_DANRE	E7EYX4_DANRE	A0A0A0MPK4_DANRE	A0A2R8QQ09_DANRE	F1QYI3_DANRE	F1QSK6_DANRE	A0A2R8S059_DANRE	E9QC99_DANRE
biological_process	GO:0010669	epithelial structure maintenance	13	25	0.52	0.999708	0.000780242	1	0.691	CRACD_DANRE	Q6EF99_DANRE	Q6EFA1_DANRE	B6IDE3_DANRE	Q6EFA0_DANRE	F1Q633_DANRE	F6P5J8_DANRE	A0A2R8QFB7_DANRE	A0A2R8Q1V0_DANRE	A2BHG4_DANRE	A0A0R4IQJ3_DANRE	A0A2R8QSM6_DANRE	A0A2R8QDV4_DANRE
biological_process	GO:0009648	photoperiodism	13	19	0.684211	0.996024	0.00971815	1	1	A4IG25_DANRE	A0A2R8RSG0_DANRE	B3DJN2_DANRE	Q8JIG3_DANRE	F1QUT1_DANRE	B3DH92_DANRE	A0A0R4ICG0_DANRE	A0A0R4IH97_DANRE	A0A2R8Q8Q0_DANRE	Q7SZZ4_DANRE	F1RDZ4_DANRE	Q5RIV1_DANRE	E7F4H0_DANRE
cellular_component	GO:0035097	histone methyltransferase complex	13	18	0.722222	0.999916	0.000195928	1	0.082	JARD2_DANRE	F1QL52_DANRE	A0A2R8Q6N1_DANRE	A0A2R8RLD2_DANRE	F1Q750_DANRE	F8W580_DANRE	A0A2R8QL12_DANRE	A8WIP5_DANRE	F1R869_DANRE	F1R870_DANRE	F8W578_DANRE	F1R9N4_DANRE	A0A2R8Q4Z6_DANRE
cellular_component	GO:0045180	basal cortex	13	24	0.541667	0.999886	0.00054041	1	0.211	CLAP2_DANRE	A0A2R8QS69_DANRE	A8WHM7_DANRE	F1R574_DANRE	A0A0R4IA44_DANRE	A2BFP0_DANRE	E9QF83_DANRE	A0A2R8QNM9_DANRE	F1R253_DANRE	E7F243_DANRE	A0A2R8QUX6_DANRE	X1WFX8_DANRE	E7FAY9_DANRE
molecular_function	GO:1990404	protein ADP-ribosylase activity	13	26	0.5	0.999546	0.00178121	1	0.698	Q499A8_DANRE	A0A0G2L4M0_DANRE	A0A140LGI3_DANRE	Q5RHR0_DANRE	B0UYL3_DANRE	A0A2R8Q5M8_DANRE	A0A0G2KLA5_DANRE	A0A2R8Q9E4_DANRE	A0A2R8Q7Y3_DANRE	A0A140LGQ8_DANRE	A0A0G2KFZ1_DANRE	A0A2R8RJW1_DANRE	A0A0R4IJ92_DANRE
biological_process	GO:0070212	protein poly-ADP-ribosylation	13	26	0.5	0.999002	0.0035792	1	1	Q499A8_DANRE	A0A0G2L4M0_DANRE	A0A140LGI3_DANRE	Q5RHR0_DANRE	B0UYL3_DANRE	A0A2R8Q5M8_DANRE	A0A0G2KLA5_DANRE	A0A2R8Q9E4_DANRE	A0A2R8Q7Y3_DANRE	A0A140LGQ8_DANRE	A0A0G2KFZ1_DANRE	A0A2R8RJW1_DANRE	A0A0R4IJ92_DANRE
cellular_component	GO:0030131	clathrin adaptor complex	13	24	0.541667	0.998832	0.00312657	1	0.719	Q6NYJ9_DANRE	Q7SZZ7_DANRE	F1RD00_DANRE	G1K2F5_DANRE	A0A2R8QRX3_DANRE	A0A2R8Q6M9_DANRE	F1QLI6_DANRE	F6NK19_DANRE	A0A0R4IL09_DANRE	A5PMS9_DANRE	I3IT87_DANRE	A2CG10_DANRE	F1Q9V1_DANRE
molecular_function	GO:0001540	amyloid-beta binding	13	32	0.40625	0.994353	0.0153998	1	1	A0A2R8RMZ0_DANRE	A0A1D5NSQ0_DANRE	A0A0R4IZI1_DANRE	E7FGL9_DANRE	A0A2R9YJM9_DANRE	E9QDB8_DANRE	F1Q9E4_DANRE	A0A2R8Q2L9_DANRE	E7FED4_DANRE	A0A1D5NS70_DANRE	X1WDK5_DANRE	A0A2R8Q612_DANRE	A0A0R4IUM3_DANRE
biological_process	GO:0023052	signaling	13	22	0.590909	0.999999	8.79961e-07	1	0.005	X1WG23_DANRE	F1RB27_DANRE	F1Q687_DANRE	A0A0G2L1F5_DANRE	A0A0G2KGM8_DANRE	F8W4C0_DANRE	F1QXB0_DANRE	F8W2U4_DANRE	E7F7X5_DANRE	Q1L8T7_DANRE	A0A2R8QNP6_DANRE	X1WG76_DANRE	A0A0R4IYK8_DANRE
biological_process	GO:0071711	basement membrane organization	13	16	0.8125	0.974831	0.0472135	1	1	B6IDE3_DANRE	A0A2R8RNY2_DANRE	F1Q633_DANRE	F1QYN1_DANRE	A0A2R8QFB7_DANRE	F1R7R3_DANRE	A0A2R8Q1V0_DANRE	A2BHG4_DANRE	F1QVQ2_DANRE	A0A0R4IQJ3_DANRE	A0A1L1QZU7_DANRE	A0A2R8QSM6_DANRE	A0A2R8QDV4_DANRE
biological_process	GO:0032483	regulation of Rab protein signal transduction	13	23	0.565217	0.999822	0.000825015	1	0.769	A0A2R8Q0K6_DANRE	A0A286Y972_DANRE	A0A0R4IIC4_DANRE	Q1LV52_DANRE	E9QIS0_DANRE	A0A0R4ITV8_DANRE	A0A2R8Q6A5_DANRE	A0A286YA84_DANRE	F1QRM3_DANRE	A0A1D5NSM6_DANRE	E7F6X3_DANRE	A0A2R8QIF7_DANRE	A0A0R4IBI0_DANRE
biological_process	GO:0042221	response to chemical	13	18	0.722222	0.000235264	0.999802	0.216	1	E7EYT4_DANRE	F1R259_DANRE	A0A0R4IUG1_DANRE	A0A0R4IPF2_DANRE	A0A2R8Q4T2_DANRE	E7F101_DANRE	F1R366_DANRE	A0A2R8QER3_DANRE	A0A0R4INM9_DANRE	A0A0R4IPF3_DANRE	A0A2R8Q521_DANRE	A0A0R4IVZ7_DANRE	X1WG57_DANRE
biological_process	GO:0006417	regulation of translation	12	44	0.272727	0.999387	0.000981838	1	0.811	PIWL2_DANRE	PABPA_DANRE	PTCD3_DANRE	IF2B1_DANRE	E7FA32_DANRE	T1ECU4_DANRE	F1R8B4_DANRE	F1R930_DANRE	F8W2Z6_DANRE	A0A0R4IKN8_DANRE	F1QFA6_DANRE	A0A2R8QE33_DANRE
molecular_function	GO:0019905	syntaxin binding	12	106	0.113208	0.172075	0.879249	1	1	Q7ZUC1_DANRE	Q6IQK3_DANRE	A0A0R4IY52_DANRE	A0A2R8RWI1_DANRE	I3IS33_DANRE	F1QM13_DANRE	U3JAI8_DANRE	A0A2R8RS78_DANRE	F1RAE9_DANRE	E7F8R8_DANRE	Q5RIN3_DANRE	A0A0R4IQM9_DANRE
molecular_function	GO:0000993	RNA polymerase II complex binding	12	26	0.461538	0.999169	0.00269511	1	0.902	PAF1_DANRE	WAC_DANRE	ZN326_DANRE	Q7T3D4_DANRE	E9QID1_DANRE	A0A2R8RXU8_DANRE	F1QGD0_DANRE	A0A2R8RRP5_DANRE	X1WHN7_DANRE	E9QHG1_DANRE	E7FGT1_DANRE	F1Q4R4_DANRE
biological_process	GO:0009755	hormone-mediated signaling pathway	12	60	0.2	0.184041	0.874798	1	1	LGR6_DANRE	B3DKN2_DANRE	Q6DG79_DANRE	Q1LYP1_DANRE	B8A510_DANRE	F1QRU1_DANRE	A0A2R8Q1K0_DANRE	F1QKV6_DANRE	A0A2R8RP24_DANRE	E9QGY9_DANRE	F1RAU6_DANRE	X1WC37_DANRE
molecular_function	GO:0031624	ubiquitin conjugating enzyme binding	12	51	0.235294	0.655996	0.472088	1	1	Q7T355_DANRE	B0V225_DANRE	B0V226_DANRE	A8WIS6_DANRE	A0A2R8QEZ7_DANRE	Q1LUI6_DANRE	A0A0R4IBL4_DANRE	B0V224_DANRE	Q6P007_DANRE	A0A2R8QJK6_DANRE	A0A2R8PZ38_DANRE	F1QHB4_DANRE
biological_process	GO:0030183	B cell differentiation	12	30	0.4	0.954297	0.0936563	1	1	A3KNM2_DANRE	D0FH56_DANRE	A0A2R8QAQ7_DANRE	A0A0R4IDA7_DANRE	A0A2R8QKN3_DANRE	A0A2R8QRL2_DANRE	A0A2R8QJH5_DANRE	I3ITC0_DANRE	I3IT45_DANRE	E7F1P1_DANRE	B8A5K6_DANRE	E7F4J7_DANRE
cellular_component	GO:0005669	transcription factor TFIID complex	12	28	0.428571	0.996659	0.0102914	1	0.985	TAF8_DANRE	TAF2_DANRE	Q66HZ5_DANRE	F1QMF8_DANRE	Q1LYC2_DANRE	A0A2R8Q9X1_DANRE	A0A2R8Q2H6_DANRE	F1QGC2_DANRE	F1R1I4_DANRE	E7FFQ2_DANRE	E7FBZ0_DANRE	A0A2R8QB19_DANRE
biological_process	GO:0030031	cell projection assembly	12	54	0.222222	0.977631	0.0274572	1	1	Q5U3T8_DANRE	Q52WY2_DANRE	E7F7Z2_DANRE	F1Q6L5_DANRE	A0A2R8QJ57_DANRE	Q1LVN6_DANRE	E7FA94_DANRE	F1QM51_DANRE	B8JMJ5_DANRE	X1WCS8_DANRE	F1R7X0_DANRE	B0S6V2_DANRE
biological_process	GO:0048936	peripheral nervous system neuron axonogenesis	12	30	0.4	0.984496	0.0381797	1	1	NOTC1_DANRE	B0V3D1_DANRE	O93616_DANRE	B0V3D3_DANRE	F1QCA7_DANRE	A0A2R8QH43_DANRE	B0V3D2_DANRE	Q90466_DANRE	F1QZF2_DANRE	B0V3D4_DANRE	A0A2R8Q5T2_DANRE	A5WUN6_DANRE
molecular_function	GO:0005262	calcium channel activity	12	49	0.244898	0.995492	0.00673532	1	0.992	B6RTA2_DANRE	S5UFP7_DANRE	E7EEJ8_DANRE	F1QN56_DANRE	E7F2U9_DANRE	A0A2R8Q2T6_DANRE	F1R6X2_DANRE	X1WHB7_DANRE	U3JAI2_DANRE	A0A0G2KME3_DANRE	E9QFK0_DANRE	B0S711_DANRE
biological_process	GO:0030177	positive regulation of Wnt signaling pathway	12	42	0.285714	0.630169	0.44805	1	1	CAPR2_DANRE	ZRN1B_DANRE	Q6EF99_DANRE	Q6EFA1_DANRE	A9ZMG5_DANRE	Q6EFA0_DANRE	B3IWJ8_DANRE	F1QG48_DANRE	A0A2R8QN12_DANRE	F6P5J8_DANRE	E7F165_DANRE	E7F1L8_DANRE
cellular_component	GO:0005743	mitochondrial inner membrane	12	191	0.0628272	8.22343e-19	1	0	1	HEM0_DANRE	S2543_DANRE	S2548_DANRE	S238A_DANRE	TIM8A_DANRE	Q6PC13_DANRE	A0A2R8Q0F5_DANRE	A0A2R8RNM0_DANRE	B8A698_DANRE	A0A0R4IJ30_DANRE	A0A2R8QFA6_DANRE	A0A2R8Q854_DANRE
molecular_function	GO:0008168	methyltransferase activity	12	81	0.148148	0.173807	0.855586	1	1	MTA70_DANRE	PRD10_DANRE	A0A0R4IF41_DANRE	E7FAN3_DANRE	A0A2R8QKD3_DANRE	F1RDI6_DANRE	A0A2R8Q5R8_DANRE	Q504A2_DANRE	A8KB55_DANRE	A2BG51_DANRE	F1R3R6_DANRE	F1Q8L8_DANRE
biological_process	GO:0090110	COPII-coated vesicle cargo loading	12	18	0.666667	0.999979	0.000152454	1	0.235	SC23A_DANRE	SC31A_DANRE	Q6AZ98_DANRE	E7F114_DANRE	A0A0R4IAZ9_DANRE	A0A0R4ICL5_DANRE	A0A2R8QCB9_DANRE	F1R7W8_DANRE	F1QRB4_DANRE	A0A0R4IMX2_DANRE	A0A0R4IP34_DANRE	E7F715_DANRE
biological_process	GO:0030968	endoplasmic reticulum unfolded protein response	12	39	0.307692	0.957043	0.0777192	1	1	CR3LA_DANRE	CR3LB_DANRE	A0A0R4IBP3_DANRE	K7DYG9_DANRE	A0A2R8RUX6_DANRE	F1QS04_DANRE	E7F921_DANRE	K7DYK6_DANRE	K7DYM6_DANRE	F1QCS2_DANRE	A0A286YAA4_DANRE	E7FGU9_DANRE
cellular_component	GO:0035869	ciliary transition zone	12	36	0.333333	0.999206	0.00214846	1	0.541	CE290_DANRE	E7FE66_DANRE	E7F4E7_DANRE	A0A2R8QMD0_DANRE	A0A2R8QB34_DANRE	F1QSP6_DANRE	E7F3T4_DANRE	A0A2R8QEZ0_DANRE	F6NUK4_DANRE	A0A286Y8M8_DANRE	E9QB24_DANRE	E9QHV7_DANRE
cellular_component	GO:0099572	postsynaptic specialization	12	28	0.428571	0.999757	0.000402561	1	0.148	DLGP1_DANRE	E7F6K9_DANRE	E7FAC5_DANRE	A0A0R4ITW6_DANRE	F8W2U4_DANRE	E7F7X5_DANRE	Q1L8T7_DANRE	F1QWU9_DANRE	F1R3Y1_DANRE	X1WG76_DANRE	A0A0R4IVK0_DANRE	A0A2R8Q3D0_DANRE
biological_process	GO:0035082	axoneme assembly	12	24	0.5	0.999999	3.99461e-06	1	0.013	DAAF1_DANRE	CCD40_DANRE	CF206_DANRE	TTLL6_DANRE	DZIP1_DANRE	BROMI_DANRE	A8WFS2_DANRE	F1QR41_DANRE	A0A2R8PW94_DANRE	F1QES5_DANRE	E7F630_DANRE	E7F542_DANRE
biological_process	GO:0036158	outer dynein arm assembly	12	28	0.428571	0.992107	0.0217014	1	1	DAAF1_DANRE	ZMY10_DANRE	A0A2R8RI11_DANRE	A0A2R8RLN9_DANRE	A0A0R4IGE5_DANRE	A0A0R4IUW7_DANRE	K7DY80_DANRE	F1QW87_DANRE	A0A2R8QHD2_DANRE	F1Q654_DANRE	F1QFD6_DANRE	F1QBY7_DANRE
biological_process	GO:0003323	type B pancreatic cell development	12	37	0.324324	0.897229	0.181734	1	1	HN1BA_DANRE	Q4L1M9_DANRE	A0A2R8QEU4_DANRE	F1QMA9_DANRE	F1RDU4_DANRE	E7F921_DANRE	A0A2R8RVU5_DANRE	F2Z4S1_DANRE	A0A0R4IU95_DANRE	A0A2R8S073_DANRE	F1QB13_DANRE	F1QUB9_DANRE
molecular_function	GO:0035615	clathrin adaptor activity	12	35	0.342857	0.966441	0.0718217	1	1	AP2MA_DANRE	AP2MB_DANRE	B0R024_DANRE	F1QDL6_DANRE	A0A0R4IKR8_DANRE	X1WBM9_DANRE	X1WGL1_DANRE	F1R6L2_DANRE	A0A0R4ITB0_DANRE	A0A0R4IU05_DANRE	A0A2R8QJ16_DANRE	A0A2R8QB02_DANRE
biological_process	GO:0007097	nuclear migration	12	20	0.6	0.999988	6.75793e-05	1	0.113	DCTN2_DANRE	E7EZ30_DANRE	F1R0W9_DANRE	R4GDU6_DANRE	F6PC33_DANRE	F1Q6N7_DANRE	X1WGA9_DANRE	F8W2N1_DANRE	A0A2R8RP20_DANRE	A0A286YA27_DANRE	A0A0R4IW36_DANRE	R4GE14_DANRE
biological_process	GO:0031146	SCF-dependent proteasomal ubiquitin-dependent protein catabolic process	12	92	0.130435	0.00584115	0.997474	0.997	1	FBXL5_DANRE	A0A0R4IWI4_DANRE	A0A2R8RVN4_DANRE	A0A2R8RR75_DANRE	F1QYZ2_DANRE	A0A2R8PXD1_DANRE	A0A2R8S0B5_DANRE	E7F5P0_DANRE	F1QWZ2_DANRE	B8K0E7_DANRE	A0A2R8QN79_DANRE	A0A2R8RJ46_DANRE
biological_process	GO:0006749	glutathione metabolic process	12	61	0.196721	0.129031	0.921425	1	1	E7F6Z6_DANRE	F1QS99_DANRE	F1QIV1_DANRE	E7FGA5_DANRE	A0A2R8RQT4_DANRE	A0A2R8Q5I5_DANRE	A0A2R8RSR5_DANRE	A0A2R8Q1W8_DANRE	A0A2R8QHN7_DANRE	E7F738_DANRE	A0A140LH37_DANRE	F1R9R0_DANRE
molecular_function	GO:0042162	telomeric DNA binding	12	23	0.521739	0.999999	4.88575e-06	1	0.006	EST1A_DANRE	CTC1_DANRE	SMG7_DANRE	TELO2_DANRE	SMG5_DANRE	TE2IP_DANRE	F1QE52_DANRE	A0A1D5NT19_DANRE	A0A1D5NS58_DANRE	F6P5S3_DANRE	F1R9M2_DANRE	F1QGF1_DANRE
molecular_function	GO:0005261	cation channel activity	12	67	0.179104	0.152077	0.867526	1	1	S5UFP7_DANRE	E7F2J4_DANRE	S5TZ97_DANRE	A0A2R8QRL6_DANRE	A0A2R8Q0G1_DANRE	F1QAW1_DANRE	R4GEU8_DANRE	A0A2R8Q3C0_DANRE	B8JIP6_DANRE	A0A0R4IUG6_DANRE	A0A2R8RW20_DANRE	A0A0R4IZ26_DANRE
biological_process	GO:0044772	mitotic cell cycle phase transition	12	43	0.27907	0.85746	0.1777	1	1	Q7ZU21_DANRE	A0A0R4IK54_DANRE	Q1L8M6_DANRE	F1R1N7_DANRE	Q6NV43_DANRE	Q6NZ31_DANRE	E7F7C9_DANRE	F1QXP6_DANRE	I3ISY0_DANRE	F1R558_DANRE	E7FH57_DANRE	A0A2R8QID0_DANRE
biological_process	GO:0000079	regulation of cyclin-dependent protein serine/threonine kinase activity	12	51	0.235294	0.665412	0.449564	1	1	Q7ZU21_DANRE	A0A0R4IK54_DANRE	Q1L8M6_DANRE	Q6NV43_DANRE	Q6NZ31_DANRE	E7F7C9_DANRE	I3ISY0_DANRE	A0A2R8PZ44_DANRE	F1Q5I0_DANRE	E7FH57_DANRE	A0A2R8RUD8_DANRE	A0A2R8QID0_DANRE
biological_process	GO:0032467	positive regulation of cytokinesis	12	21	0.571429	0.999759	0.00115182	1	0.883	CC14A_DANRE	Q7ZVN3_DANRE	A0A2R8Q0L0_DANRE	A0A0R4ILV5_DANRE	A0A2R8QAD2_DANRE	E7EXI3_DANRE	A0A2R8RIU6_DANRE	A0A2R8Q3U3_DANRE	A0A2R8QT80_DANRE	F8W600_DANRE	F8W5R0_DANRE	F8W2B2_DANRE
molecular_function	GO:0042277	peptide binding	12	91	0.131868	0.0209728	0.985657	1	1	GPR22_DANRE	E7F123_DANRE	F1Q5N3_DANRE	E4W699_DANRE	F8W5T4_DANRE	A0A0R4INQ5_DANRE	A0A2R8QBK0_DANRE	E9QIR0_DANRE	A0A0R4ILB1_DANRE	A0A2R8QL18_DANRE	A0A0R4IIN9_DANRE	A0A2R8Q716_DANRE
cellular_component	GO:0005776	autophagosome	12	52	0.230769	0.360811	0.735922	1	1	BECN1_DANRE	AMR1A_DANRE	AMR1B_DANRE	F1R340_DANRE	E7FDW4_DANRE	F6P7J8_DANRE	A0A140LGA1_DANRE	E7F4Z9_DANRE	B0S696_DANRE	E7F458_DANRE	A0A2R8RWY9_DANRE	X1WI07_DANRE
molecular_function	GO:0005245	voltage-gated calcium channel activity	12	98	0.122449	0.291423	0.779199	1	1	E7F278_DANRE	A0A0R4INP7_DANRE	A8B6E8_DANRE	E9QIG7_DANRE	Q5RHB1_DANRE	F1RE82_DANRE	E7F4T2_DANRE	Q5TZ68_DANRE	A0A2R8QDT8_DANRE	Q1MTF2_DANRE	E9QJF6_DANRE	Q5RHB2_DANRE
molecular_function	GO:0019888	protein phosphatase regulator activity	12	68	0.176471	0.136637	0.904368	1	1	A3KNJ7_DANRE	Q5RGI5_DANRE	A0A286YB73_DANRE	A5WVJ2_DANRE	A0A0R4IPH0_DANRE	A5WVJ0_DANRE	A0A2R8PZN4_DANRE	X1WD74_DANRE	X1WG48_DANRE	F1Q753_DANRE	X1WB97_DANRE	E7FEM0_DANRE
biological_process	GO:0060729	intestinal epithelial structure maintenance	12	32	0.375	0.972304	0.0618846	1	1	Q1L8A5_DANRE	A0A2R8RZV0_DANRE	F1Q4W7_DANRE	E7F6V1_DANRE	F1QE52_DANRE	A0A286YAM6_DANRE	F8W2W1_DANRE	A0A2R8QE63_DANRE	A0A2R8QAW0_DANRE	A8E7B7_DANRE	F8W451_DANRE	A0A2R8QPA8_DANRE
cellular_component	GO:0000793	condensed chromosome	12	19	0.631579	0.999998	4.08917e-06	1	0.002	BRD4_DANRE	Q7ZVN3_DANRE	A0A2R8Q9M3_DANRE	B8A5K9_DANRE	B3DJT4_DANRE	F1QJY8_DANRE	A0A2R8PZ20_DANRE	A0A2R8Q4V9_DANRE	Q5RGX4_DANRE	F8W600_DANRE	F8W5R0_DANRE	F8W2B2_DANRE
biological_process	GO:0048738	cardiac muscle tissue development	12	35	0.342857	0.734112	0.32286	1	1	FGR1A_DANRE	N2F1A_DANRE	Q9W6U0_DANRE	F1QZQ0_DANRE	A0A2R8RTS6_DANRE	U3JAM7_DANRE	F1R7N8_DANRE	F1RCC9_DANRE	F1R899_DANRE	A0A140LH61_DANRE	B0S758_DANRE	F1QS48_DANRE
molecular_function	GO:0005021	vascular endothelial growth factor-activated receptor activity	12	12	1	1	1.52019e-08	1	0	NRP1A_DANRE	VGFR3_DANRE	A0A0R4IFP8_DANRE	B0S6D0_DANRE	B3DKP1_DANRE	Q1RLY9_DANRE	F1QXE5_DANRE	A0A0R4IFS9_DANRE	F1QN93_DANRE	F1QBD0_DANRE	A0A2R8QSE0_DANRE	A0A2R8RMW2_DANRE
cellular_component	GO:0031594	neuromuscular junction	12	37	0.324324	0.955385	0.0907271	1	1	DLG1_DANRE	A0A2R8Q4Q1_DANRE	F1QVH9_DANRE	F1R275_DANRE	A0A2R8RMN7_DANRE	X1WBC3_DANRE	A0A2R8Q4E3_DANRE	E7FCR8_DANRE	A0A2R8QCE0_DANRE	A0A0G2L109_DANRE	A0A2R8PZY5_DANRE	A0A2R8QGT9_DANRE
biological_process	GO:0048884	neuromast development	12	52	0.230769	0.994267	0.00957975	1	1	SCRIB_DANRE	WNT5B_DANRE	Q9I9I2_DANRE	B7ZDE9_DANRE	A0A0R4ICW0_DANRE	A0A0R4IF59_DANRE	A0A2R8QRX3_DANRE	A0A2R8Q6M9_DANRE	A0A0R4ISY7_DANRE	A0A0R4INK8_DANRE	A5PMS9_DANRE	A0A0R4IL48_DANRE
biological_process	GO:0035907	dorsal aorta development	12	21	0.571429	0.996421	0.0111688	1	1	NOTC1_DANRE	AMOL2_DANRE	DLLC_DANRE	O93616_DANRE	F1QCA7_DANRE	A0A2R8Q7E4_DANRE	A0A2R8QH43_DANRE	B8A5S6_DANRE	Q5SPB5_DANRE	F1QZF2_DANRE	A0A2R8Q5T2_DANRE	A5WUN6_DANRE
biological_process	GO:0003205	cardiac chamber development	12	16	0.75	0.984832	0.0267588	1	1	TBX6L_DANRE	TBX2_DANRE	F1R7N7_DANRE	F1Q5T5_DANRE	A0A286YBQ8_DANRE	B8JKS6_DANRE	A0A0R4IQK3_DANRE	A0A2R8PW40_DANRE	F1QV06_DANRE	A0A2R8PZ52_DANRE	B0R122_DANRE	A0A0R4ICD7_DANRE
biological_process	GO:0021554	optic nerve development	12	25	0.48	0.992073	0.02007	1	1	TBX5A_DANRE	E9QHI1_DANRE	F1QYE2_DANRE	E3W6T6_DANRE	A0A0R4ICW0_DANRE	A0A0R4IF59_DANRE	G1K2W9_DANRE	A0A2R8S019_DANRE	A0A2R8PV67_DANRE	A0A0R4ISY7_DANRE	A0A0R4INK8_DANRE	A0A0R4IL48_DANRE
molecular_function	GO:0005164	tumor necrosis factor receptor binding	12	37	0.324324	0.947957	0.103313	1	1	TRAF6_DANRE	Q0PKX8_DANRE	Q1L8A5_DANRE	F1Q767_DANRE	F1QUA2_DANRE	F1RAX0_DANRE	F1QT03_DANRE	F6NY94_DANRE	B0UXK1_DANRE	E7FBZ8_DANRE	F1QSF7_DANRE	F1RAV7_DANRE
biological_process	GO:0006405	RNA export from nucleus	12	17	0.705882	0.963899	0.0590366	1	1	E9QIQ3_DANRE	A0A0R4IUH7_DANRE	A0A0R4IK82_DANRE	A0A0R4IVZ0_DANRE	A0A0R4IG74_DANRE	F1QE76_DANRE	A0A0H2UKK7_DANRE	E9QEC4_DANRE	E7F5M0_DANRE	A0A2R8QTE7_DANRE	F1Q953_DANRE	A0A2R8Q9H4_DANRE
molecular_function	GO:0015276	ligand-gated ion channel activity	12	82	0.146341	0.0217684	0.983993	1	1	Q08CV1_DANRE	I3NI77_DANRE	E7EYT4_DANRE	R4GDN8_DANRE	B0V2X4_DANRE	X1WEX9_DANRE	E7F101_DANRE	F1R366_DANRE	F1QDE5_DANRE	E7F3Z4_DANRE	A0A2R8QLP2_DANRE	E7F2N4_DANRE
molecular_function	GO:0004114	3',5'-cyclic-nucleotide phosphodiesterase activity	12	54	0.222222	0.455391	0.667378	1	1	A0A0R4IEP8_DANRE	Q1L999_DANRE	E7F6Z8_DANRE	A0A2R8QM15_DANRE	F6P4K3_DANRE	A0A0R4IMH2_DANRE	A0A0R4IE93_DANRE	E7FAS0_DANRE	F1R112_DANRE	A0A2R8QDA8_DANRE	A0A2R8RXK7_DANRE	F1QM22_DANRE
biological_process	GO:0016576	histone dephosphorylation	12	16	0.75	0.999998	2.45465e-05	1	0.047	F1QNU4_DANRE	Q66HX1_DANRE	F1R5X1_DANRE	Q6DBY3_DANRE	E9QGZ3_DANRE	E9QIR1_DANRE	E9QJ32_DANRE	F1Q5R9_DANRE	E7FA98_DANRE	A0A0R4IA41_DANRE	E9QGF5_DANRE	A3KQ54_DANRE
biological_process	GO:2001240	negative regulation of extrinsic apoptotic signaling pathway in absence of ligand	12	16	0.75	0.999998	2.45465e-05	1	0.047	F1QNU4_DANRE	Q66HX1_DANRE	F1R5X1_DANRE	Q6DBY3_DANRE	E9QGZ3_DANRE	E9QIR1_DANRE	E9QJ32_DANRE	F1Q5R9_DANRE	E7FA98_DANRE	A0A0R4IA41_DANRE	E9QGF5_DANRE	A3KQ54_DANRE
biological_process	GO:0033365	protein localization to organelle	12	19	0.631579	0.718459	0.31593	1	1	A4IG44_DANRE	F1QX00_DANRE	A0A2R8Q9F8_DANRE	A0A2R8QID4_DANRE	F1RBX3_DANRE	A0A2R8RN40_DANRE	A0A2R8QLR4_DANRE	A0A2R8RHV3_DANRE	A0A2R8QKU3_DANRE	A0A2R8QFA0_DANRE	B8JIT9_DANRE	A0A2R8PYJ3_DANRE
molecular_function	GO:0030170	pyridoxal phosphate binding	11	92	0.119565	0.00839913	0.996358	0.976	1	PDXD1_DANRE	MOCOS_DANRE	HEM0_DANRE	Q7ZUW8_DANRE	E7F5G8_DANRE	A0A2R8QCX7_DANRE	A0A2R8QLZ2_DANRE	A0A0R4IU72_DANRE	A0A0R4IQA6_DANRE	A0A0G2KSN1_DANRE	A0A2R8QBE4_DANRE
biological_process	GO:0043406	positive regulation of MAP kinase activity	11	35	0.314286	0.843202	0.260651	1	1	FGR1A_DANRE	A0A2R8Q0D8_DANRE	D0FH56_DANRE	F1QCV5_DANRE	E7FBB3_DANRE	A0A2R8RHW9_DANRE	A0A2R8QRD6_DANRE	A0A2R8RPQ4_DANRE	A0A2R8PYF1_DANRE	B8A5K6_DANRE	F1QS30_DANRE
biological_process	GO:0021984	adenohypophysis development	11	20	0.55	0.999175	0.00324535	1	0.995	DISP1_DANRE	DZIP1_DANRE	B0S6T1_DANRE	F1QNU4_DANRE	A0A2R8QKN2_DANRE	Q6DBY3_DANRE	E9QJ32_DANRE	A0A2R8QNY0_DANRE	F6PE50_DANRE	F1QAC4_DANRE	A0A2R8QMX9_DANRE
biological_process	GO:0034587	piRNA metabolic process	11	28	0.392857	0.992032	0.0209465	1	1	PIWL2_DANRE	TRD7A_DANRE	TRD7B_DANRE	TDRD5_DANRE	TDRD1_DANRE	TDRD9_DANRE	A0A2R8QE00_DANRE	X1WC78_DANRE	A0A2R8QQC4_DANRE	Q5VSI4_DANRE	A0A286YB87_DANRE
biological_process	GO:0071466	cellular response to xenobiotic stimulus	11	52	0.211538	0.000192996	0.999926	0.183	1	KEP1B_DANRE	F1QJN9_DANRE	Q66I11_DANRE	B0UXS0_DANRE	F8W3Q5_DANRE	F1QBH6_DANRE	Q1LV27_DANRE	E9QH22_DANRE	A0A286YAF6_DANRE	Q5TZ29_DANRE	A0A0R4IVH6_DANRE
cellular_component	GO:0005795	Golgi stack	11	33	0.333333	0.382251	0.702199	1	1	DNMBP_DANRE	Q7ZW40_DANRE	Q6EF99_DANRE	Q6EFA1_DANRE	Q6EFA0_DANRE	F6P5J8_DANRE	E7F2J5_DANRE	A0A2R8QRS8_DANRE	A0A2R8RV10_DANRE	A0A0R4ILB6_DANRE	A0A2R8QLN9_DANRE
molecular_function	GO:0008375	acetylglucosaminyltransferase activity	11	36	0.305556	0.822194	0.250759	1	1	EXT1A_DANRE	EXT1B_DANRE	EXT1C_DANRE	PMGT2_DANRE	RFNG_DANRE	A0A068F9P7_DANRE	E9QJD3_DANRE	F1R2G8_DANRE	A0A2R8RT62_DANRE	A0A2R8QRB6_DANRE	A0A0R4ILB6_DANRE
molecular_function	GO:0003727	single-stranded RNA binding	11	36	0.305556	0.978985	0.0353678	1	1	ILF3_DANRE	ZFR_DANRE	F1QB35_DANRE	E9QD44_DANRE	F1QZW7_DANRE	A0A2R8Q4T1_DANRE	F1Q5Q7_DANRE	F1RC54_DANRE	F6PD25_DANRE	A0A2R8RUM2_DANRE	A0A2R8RW79_DANRE
biological_process	GO:0000184	nuclear-transcribed mRNA catabolic process, nonsense-mediated decay	11	31	0.354839	0.98493	0.0359023	1	1	SMG1_DANRE	EST1A_DANRE	PYM1_DANRE	SMG7_DANRE	SMG5_DANRE	RENT1_DANRE	NBAS_DANRE	Q803B9_DANRE	E7F7F6_DANRE	X1WD43_DANRE	A0A2R8QK29_DANRE
cellular_component	GO:0071013	catalytic step 2 spliceosome	11	61	0.180328	0.669313	0.439975	1	1	A2BIQ7_DANRE	F1Q7N6_DANRE	F1QT45_DANRE	A0A0R4J8E6_DANRE	X1WDX4_DANRE	F1QQV6_DANRE	A0A2R8QML1_DANRE	A0A286Y8Y8_DANRE	A2BIQ8_DANRE	A0A286YA65_DANRE	E7F7E3_DANRE
biological_process	GO:0070286	axonemal dynein complex assembly	11	22	0.5	0.999972	9.1033e-05	1	0.168	PIHD1_DANRE	RUVB2_DANRE	CCD39_DANRE	CCD40_DANRE	SPAG1_DANRE	DRC2_DANRE	DRC1_DANRE	DAAF3_DANRE	I6L846_DANRE	F1QFD6_DANRE	A0A0R4IRP6_DANRE
molecular_function	GO:0000049	tRNA binding	11	74	0.148649	0.075855	0.959227	1	1	CTU2_DANRE	MTU1_DANRE	XPOT_DANRE	G1K2X8_DANRE	F8W4R7_DANRE	F1QRX8_DANRE	A0A2R8RTA8_DANRE	F8W4W5_DANRE	E7F3M0_DANRE	E9QII1_DANRE	F8W370_DANRE
biological_process	GO:0007413	axonal fasciculation	11	25	0.44	0.994599	0.0157833	1	1	NRP1A_DANRE	F1R5S1_DANRE	B0S6D0_DANRE	E9QHI1_DANRE	F1QBD4_DANRE	F1QYE2_DANRE	F1QP50_DANRE	A0A2R8QQ09_DANRE	A0A2R8S019_DANRE	A0A2R8PV67_DANRE	E9QC99_DANRE
biological_process	GO:0048010	vascular endothelial growth factor receptor signaling pathway	11	27	0.407407	0.99922	0.00204705	1	0.959	NRP1A_DANRE	VGFR3_DANRE	A0A0R4IFP8_DANRE	B3DKP1_DANRE	Q1RLY9_DANRE	F1QXE5_DANRE	A0A0R4IFS9_DANRE	F1QBD0_DANRE	A0A2R8QSE0_DANRE	A0A2R8RMW2_DANRE	E7EZR4_DANRE
cellular_component	GO:0035267	NuA4 histone acetyltransferase complex	11	30	0.366667	0.982916	0.0407426	1	1	RUVB2_DANRE	TRRAP_DANRE	Q6DHD0_DANRE	E9QG94_DANRE	B0R0X6_DANRE	F6NXN2_DANRE	A0A2R8QIK4_DANRE	F1QH22_DANRE	E7F3M6_DANRE	F1R0R1_DANRE	B8JKI8_DANRE
biological_process	GO:0003351	epithelial cilium movement involved in extracellular fluid movement	11	26	0.423077	0.997418	0.00588624	1	1	RUVB2_DANRE	CCD40_DANRE	B0UYB0_DANRE	A0A2R8RQB1_DANRE	F1QVN7_DANRE	I3ITD2_DANRE	A0A2R8QRB2_DANRE	A0A2R8QP75_DANRE	A0A2R8QDU7_DANRE	A0A140LG62_DANRE	A0A140LFR2_DANRE
molecular_function	GO:0051539	4 iron, 4 sulfur cluster binding	11	67	0.164179	0.15458	0.908713	1	1	NARFL_DANRE	DDX11_DANRE	B8JIP2_DANRE	F1QMW8_DANRE	B0V351_DANRE	F1QNW3_DANRE	F1QBP9_DANRE	A0A2R8PX42_DANRE	E7FB68_DANRE	E9QIM3_DANRE	A0A2R8PX77_DANRE
cellular_component	GO:0030173	integral component of Golgi membrane	11	79	0.139241	0.0530032	0.972618	1	1	RFNG_DANRE	F1QXC7_DANRE	Q29RC8_DANRE	B0UXN0_DANRE	A0A2R8QJ77_DANRE	F1R027_DANRE	X1WFC5_DANRE	E9QFF5_DANRE	A0A2R8PYY1_DANRE	F1RBV9_DANRE	F8W5I1_DANRE
biological_process	GO:0006457	protein folding	11	128	0.0859375	2.32565e-10	1	0	1	CD37L_DANRE	Q7T3L3_DANRE	Q3KR14_DANRE	B0UXN0_DANRE	A0A286YAP4_DANRE	A0A0R4IXD9_DANRE	F1QJC8_DANRE	F1R1T5_DANRE	A0A2R8QJ57_DANRE	B8JMJ5_DANRE	X1WCS8_DANRE
biological_process	GO:0007009	plasma membrane organization	11	38	0.289474	0.00153501	0.999325	0.787	1	BI2L2_DANRE	H2ZRH2_DANRE	A0A0J9YIX2_DANRE	A0A0R4IB32_DANRE	Q1LVN6_DANRE	E7FA94_DANRE	F1QM51_DANRE	A0A2R8Q5K8_DANRE	F6PEI4_DANRE	F1QB08_DANRE	B0S6V2_DANRE
biological_process	GO:0007095	mitotic G2 DNA damage checkpoint signaling	11	16	0.6875	0.999975	0.00019358	1	0.292	TICRR_DANRE	BABA1_DANRE	ABRX1_DANRE	NBN_DANRE	DTL_DANRE	F1R135_DANRE	Q7ZVD7_DANRE	A0A0R4ITV5_DANRE	A0A2R8RXV8_DANRE	E9QF00_DANRE	A0A2R8RVN3_DANRE
biological_process	GO:0043484	regulation of RNA splicing	11	67	0.164179	0.0469401	0.966531	1	1	BRDT_DANRE	RFOX1_DANRE	ZN326_DANRE	Q7ZVN6_DANRE	A0A2R8RXA1_DANRE	A0A0R4IV43_DANRE	A0A0R4IY96_DANRE	E7F2E1_DANRE	F6NS95_DANRE	A0A2R8QK17_DANRE	E7F6E2_DANRE
biological_process	GO:0032007	negative regulation of TOR signaling	11	39	0.282051	0.923851	0.125407	1	1	MNAR1_DANRE	A0A0R4ISE0_DANRE	Q6DHN7_DANRE	A0A0G2KHX4_DANRE	A2BFC8_DANRE	A0A2R8QQY4_DANRE	A0A286Y892_DANRE	E7EXM8_DANRE	E7FEJ0_DANRE	A0A2R8QQL1_DANRE	A0A2R8QHE1_DANRE
biological_process	GO:0051091	positive regulation of DNA-binding transcription factor activity	11	28	0.392857	0.999568	0.000946419	1	0.808	JMY_DANRE	ARI5B_DANRE	SOX2_DANRE	SOX1A_DANRE	A0A0R4IGS9_DANRE	A0A2R8QKJ7_DANRE	R4GEM4_DANRE	A0A2R8RN05_DANRE	A0A2U3TVI0_DANRE	E7F4W0_DANRE	A0A0R4IHA5_DANRE
cellular_component	GO:0043596	nuclear replication fork	11	13	0.846154	1	1.67561e-08	1	0	SMAL1_DANRE	MMS22_DANRE	TONSL_DANRE	E7EXE0_DANRE	A0A2R8RXE4_DANRE	A0A2R8PYQ8_DANRE	A0A0R4IDC2_DANRE	F1Q7G1_DANRE	E7F296_DANRE	R4GDY2_DANRE	A0A0R4J7S6_DANRE
cellular_component	GO:0030139	endocytic vesicle	11	44	0.25	0.505799	0.593534	1	1	MIB1_DANRE	RFP4A_DANRE	RFIP3_DANRE	F1R4R9_DANRE	E7FGA0_DANRE	E9QCU8_DANRE	A0A0G2L933_DANRE	A0A140LH23_DANRE	F1Q6Q6_DANRE	A0A286YAA1_DANRE	E9QFU5_DANRE
biological_process	GO:0070830	bicellular tight junction assembly	11	72	0.152778	0.0498602	0.974612	1	1	Q08BB8_DANRE	R4GDY5_DANRE	F1R4L5_DANRE	A0A2R8PY22_DANRE	A0A0G2L7R9_DANRE	F1QWK3_DANRE	F1QE46_DANRE	A0A0R4IXD9_DANRE	A0A2R8PYS8_DANRE	F8W4R4_DANRE	A0A2R8QNL1_DANRE
biological_process	GO:0009306	protein secretion	11	46	0.23913	0.459683	0.624007	1	1	A0A0R4IZ17_DANRE	F1Q666_DANRE	A0A2R8Q2U0_DANRE	A0A2R8QC32_DANRE	E9QDA3_DANRE	A0A0R4IGM8_DANRE	A0A2R8QJR2_DANRE	A0A2R8Q077_DANRE	F1QY58_DANRE	F1R5N2_DANRE	Q5SP05_DANRE
molecular_function	GO:0008528	G protein-coupled peptide receptor activity	11	98	0.112245	1.27908e-14	1	0	1	LGR6_DANRE	E7FB43_DANRE	F1R4K2_DANRE	F1Q7N9_DANRE	F1QSR0_DANRE	A0A2R8QMR8_DANRE	E7FF79_DANRE	F1RCQ6_DANRE	A0A0G2L5R5_DANRE	A0A0R4IKR9_DANRE	A0A0R4IS63_DANRE
molecular_function	GO:0016757	glycosyltransferase activity	11	91	0.120879	1.61873e-11	1	0	1	EXT1A_DANRE	EXT1B_DANRE	EXT1C_DANRE	PMGT2_DANRE	A0A068F9P7_DANRE	E9QJD3_DANRE	F1R2G8_DANRE	A0A2R8RT62_DANRE	B8JLQ4_DANRE	A0A2R8QRB6_DANRE	F1QAS8_DANRE
biological_process	GO:0040037	negative regulation of fibroblast growth factor receptor signaling pathway	11	34	0.323529	0.906344	0.172849	1	1	I17RD_DANRE	SHP2A_DANRE	SPT5H_DANRE	Q6EF99_DANRE	Q6EFA1_DANRE	Q6EFA0_DANRE	F1QY45_DANRE	F6P5J8_DANRE	A0A2R8QLF5_DANRE	A0A2R8RT96_DANRE	A0A286Y942_DANRE
biological_process	GO:0060030	dorsal convergence	11	28	0.392857	0.978299	0.0525624	1	1	WNT5B_DANRE	F1QSX8_DANRE	F1QY45_DANRE	A0A0R4INF0_DANRE	E7FAI5_DANRE	A3QK09_DANRE	A0A2R8RPF9_DANRE	A0A2R8QLF5_DANRE	A2RRV7_DANRE	A0A2R8RT96_DANRE	A0A286Y942_DANRE
molecular_function	GO:0003785	actin monomer binding	11	39	0.282051	0.858203	0.239262	1	1	COBL_DANRE	E7F9J6_DANRE	A0A0N4SUG1_DANRE	A0A2R8QQ65_DANRE	U3JAC1_DANRE	T1ECS5_DANRE	I3ITH3_DANRE	U3JAF8_DANRE	A0A0R4IXG5_DANRE	A0A2R8QQI2_DANRE	A0A2R8Q4U0_DANRE
biological_process	GO:0060037	pharyngeal system development	11	36	0.305556	0.763369	0.359843	1	1	DLX2A_DANRE	B6V3E1_DANRE	Q9I9I2_DANRE	B8A551_DANRE	B0UXY9_DANRE	B8JKQ1_DANRE	F1QQN6_DANRE	E7FBG0_DANRE	A0A2R8PW40_DANRE	B0R122_DANRE	E7F226_DANRE
biological_process	GO:0007029	endoplasmic reticulum organization	11	31	0.354839	0.198448	0.866605	1	1	SC31A_DANRE	F6NJS4_DANRE	E7F114_DANRE	A0A2R8RX84_DANRE	A0A2R8Q554_DANRE	B8A6H1_DANRE	A2CEM4_DANRE	F6PA68_DANRE	A2CEM2_DANRE	E9QGX9_DANRE	A0A2R8Q6L9_DANRE
biological_process	GO:0032835	glomerulus development	11	31	0.354839	0.999953	0.000103347	1	0.183	THS7A_DANRE	B0S6T1_DANRE	Q9PUT7_DANRE	B8A5N9_DANRE	E7FDV0_DANRE	A4VCF3_DANRE	F8W3L6_DANRE	A0A1D5NS66_DANRE	A0A0R4IBP9_DANRE	A0A2R8QQJ0_DANRE	A0A2R8QMX9_DANRE
biological_process	GO:0042157	lipoprotein metabolic process	11	37	0.297297	3.43988e-06	0.999999	0.003	1	APOA1_DANRE	F1QHR0_DANRE	A0A0R4IU48_DANRE	F1QJD1_DANRE	B3DHC5_DANRE	E7F980_DANRE	E9QBB8_DANRE	A0A0R4IDS0_DANRE	F1QCQ0_DANRE	A0A2R8S0I9_DANRE	E9QJQ2_DANRE
molecular_function	GO:0016538	cyclin-dependent protein serine/threonine kinase regulator activity	11	58	0.189655	0.169714	0.892347	1	1	Q7ZU21_DANRE	A0A0R4IK54_DANRE	Q1L8M6_DANRE	Q6NV43_DANRE	Q803Q8_DANRE	Q6NZ31_DANRE	E7F7C9_DANRE	A0A2R8QAB1_DANRE	I3ISY0_DANRE	E7FH57_DANRE	A0A2R8QID0_DANRE
molecular_function	GO:0008139	nuclear localization sequence binding	11	26	0.423077	0.993926	0.0180375	1	1	A0A0R4IVZ0_DANRE	F1R2H0_DANRE	F1QIP3_DANRE	A0A2R8RZX0_DANRE	A0A2R8Q4D0_DANRE	A0A0R4IMZ8_DANRE	A0A0H2UKK7_DANRE	E7F5M0_DANRE	F1QG82_DANRE	F1QWS2_DANRE	F1R750_DANRE
biological_process	GO:0060287	epithelial cilium movement involved in determination of left/right asymmetry	11	27	0.407407	0.984217	0.0404384	1	1	CP131_DANRE	CCD39_DANRE	CCD40_DANRE	OFD1_DANRE	POC1B_DANRE	GLE1_DANRE	F1Q6J7_DANRE	E9QH47_DANRE	A0A0R4IUQ6_DANRE	F1QM29_DANRE	A0A0G2L8X4_DANRE
biological_process	GO:0021514	ventral spinal cord interneuron differentiation	11	31	0.354839	0.981856	0.0395	1	1	MIB1_DANRE	NOTC1_DANRE	DLLC_DANRE	O93616_DANRE	F1QCA7_DANRE	A0A2R8Q7E4_DANRE	A0A2R8QH43_DANRE	Q5SPB5_DANRE	F1QZF2_DANRE	A0A2R8Q5T2_DANRE	A5WUN6_DANRE
biological_process	GO:0045176	apical protein localization	11	16	0.6875	0.999975	0.00019358	1	0.292	PAL1A_DANRE	Q6TNS1_DANRE	F1R0W9_DANRE	A0A2R8QCI9_DANRE	E7F501_DANRE	A0A2R8RP20_DANRE	A0A286YA27_DANRE	A0A2R8QJ57_DANRE	A0A2R8QV56_DANRE	B8JMJ5_DANRE	X1WCS8_DANRE
molecular_function	GO:0005005	transmembrane-ephrin receptor activity	11	27	0.407407	0.991257	0.0244274	1	1	Q5VSJ4_DANRE	A0A0R4ILA5_DANRE	F1R5P2_DANRE	A0A2R8RS29_DANRE	A0A2R8QJW7_DANRE	F1RCR4_DANRE	A0A0R4IEC7_DANRE	A0A2R8QG72_DANRE	F1QEJ3_DANRE	F1RCL1_DANRE	A2CEJ3_DANRE
biological_process	GO:0030199	collagen fibril organization	11	47	0.234043	0.638435	0.491993	1	1	B3DLK0_DANRE	Q6NYT8_DANRE	Q2LDA1_DANRE	A0A0R4IMA3_DANRE	X1WFR7_DANRE	A0A0R4IHB0_DANRE	E7EXE7_DANRE	F1QD91_DANRE	F1QXN1_DANRE	A0A2R8QTC7_DANRE	F1QXL0_DANRE
molecular_function	GO:0097602	cullin family protein binding	11	27	0.407407	0.991257	0.0244274	1	1	CCD22_DANRE	U3JA92_DANRE	B0V225_DANRE	B0V226_DANRE	A0A2R8QEZ7_DANRE	A0A2R8QCL5_DANRE	A0A0R4IBL4_DANRE	B0V224_DANRE	Q6P007_DANRE	A0A2R8QJK6_DANRE	A0A0G2KVJ0_DANRE
biological_process	GO:0048009	insulin-like growth factor receptor signaling pathway	11	17	0.647059	0.994599	0.0157833	1	1	GGYF2_DANRE	A0A2R8PV44_DANRE	A0A2R8Q844_DANRE	Q1LWJ4_DANRE	A0A1D5NSW7_DANRE	A0A2R8RIL5_DANRE	A0A0R4IGP2_DANRE	A0A286Y9P5_DANRE	E7FEZ2_DANRE	A0A2R8QR15_DANRE	A0A2R8QM53_DANRE
biological_process	GO:0071222	cellular response to lipopolysaccharide	11	57	0.192982	0.312453	0.789663	1	1	E7FCP9_DANRE	F1R3C6_DANRE	Q7ZZT0_DANRE	A0A2R8QN98_DANRE	A0A140LFY5_DANRE	A0A0R4IPR2_DANRE	E9QGD4_DANRE	A0A2R8Q4R6_DANRE	A0A2R8Q5Y7_DANRE	A0A0R4IFS1_DANRE	A0A286Y8A4_DANRE
biological_process	GO:0003140	determination of left/right asymmetry in lateral mesoderm	11	38	0.289474	0.857461	0.236631	1	1	GPR22_DANRE	TBXTA_DANRE	A4FTT4_DANRE	Q9W6I6_DANRE	A0A2R8QMD0_DANRE	F1QMM7_DANRE	B8A5N9_DANRE	F1QSP6_DANRE	A4FTT3_DANRE	F6NUK4_DANRE	A2AR67_DANRE
biological_process	GO:0006891	intra-Golgi vesicle-mediated transport	11	46	0.23913	0.669351	0.459386	1	1	COPB_DANRE	Q7SY45_DANRE	A0A0R4IXT6_DANRE	A0A1D5NSF5_DANRE	A0A2R8RUW2_DANRE	B0R171_DANRE	B8A541_DANRE	F6NMG5_DANRE	A0A2R8RQB0_DANRE	F1RBV9_DANRE	F1R7S1_DANRE
biological_process	GO:0045165	cell fate commitment	11	61	0.180328	0.999996	6.92903e-06	1	0.019	WNT5B_DANRE	Q9W6U0_DANRE	Q6NW63_DANRE	B6V3E1_DANRE	Q9I9I2_DANRE	F1R205_DANRE	F1QAD6_DANRE	F1QD30_DANRE	A0A0R4IB15_DANRE	F1RB76_DANRE	F1RAB5_DANRE
biological_process	GO:0045116	protein neddylation	11	31	0.354839	0.938115	0.123729	1	1	ULA1_DANRE	F1QR83_DANRE	B0V225_DANRE	B0V226_DANRE	A0A2R8Q9W3_DANRE	A0A2R8QEZ7_DANRE	A0A0R4ICE9_DANRE	A0A0R4IBL4_DANRE	B0V224_DANRE	Q6P007_DANRE	A0A2R8QJK6_DANRE
cellular_component	GO:0097546	ciliary base	11	30	0.366667	0.981044	0.0462583	1	1	B0UYB0_DANRE	A0A2R8QMD0_DANRE	F1QVN7_DANRE	A0A2R8QAI4_DANRE	F1QSP6_DANRE	A0A2R8QRB2_DANRE	X1WF00_DANRE	A0A2R8QDU7_DANRE	F6NUK4_DANRE	A8DZ53_DANRE	E7F2T0_DANRE
biological_process	GO:0007026	negative regulation of microtubule depolymerization	11	22	0.5	0.998017	0.00724421	1	1	CAM1B_DANRE	F1QGA8_DANRE	E7F693_DANRE	E7F3U0_DANRE	A0A2R8RJ37_DANRE	Q1LUF1_DANRE	F1R1D6_DANRE	F8W4Z3_DANRE	F1Q557_DANRE	E7F064_DANRE	A0A0R4IWH7_DANRE
biological_process	GO:0071277	cellular response to calcium ion	11	73	0.150685	0.0785746	0.955776	1	1	AGRV1_DANRE	Q7T296_DANRE	A0A286Y928_DANRE	A0A2R8RWI1_DANRE	I3IS33_DANRE	E7F5X2_DANRE	U3JA52_DANRE	A0A2R8RS78_DANRE	X1WDZ6_DANRE	A0A2R8RVP9_DANRE	E7F8R8_DANRE
molecular_function	GO:0035497	cAMP response element binding	11	28	0.392857	0.987758	0.0323122	1	1	CR3LA_DANRE	CR3LB_DANRE	Q803K8_DANRE	A0A2R8RUX6_DANRE	F1QS04_DANRE	E7FFR4_DANRE	A0A0R4IL04_DANRE	A0A0R4IFU8_DANRE	E9QHQ2_DANRE	E7FGU9_DANRE	E9QHG0_DANRE
biological_process	GO:0060536	cartilage morphogenesis	11	39	0.282051	0.827563	0.270882	1	1	WNT5B_DANRE	X1WCY4_DANRE	Q9DFH2_DANRE	B6V3E1_DANRE	A0A2R8QAL3_DANRE	F1QA09_DANRE	F1QQN6_DANRE	F1QRB4_DANRE	A5WW41_DANRE	A0A0R4ICD7_DANRE	E7F226_DANRE
biological_process	GO:0017156	calcium-ion regulated exocytosis	11	50	0.22	0.966255	0.0530104	1	1	A0A2R8QNF5_DANRE	A0A2R8RWI1_DANRE	I3IS33_DANRE	A0A2R8Q6Y0_DANRE	U3JA52_DANRE	A0A2R8Q594_DANRE	A0A2R8Q5J7_DANRE	A0A2R8RS78_DANRE	X1WDZ6_DANRE	A0A2R8RVP9_DANRE	E7F8R8_DANRE
molecular_function	GO:0017046	peptide hormone binding	11	62	0.177419	0.326044	0.77781	1	1	A8WH88_DANRE	F1Q5N3_DANRE	A0A0R4IE17_DANRE	E7FB43_DANRE	E4W699_DANRE	E7FF79_DANRE	F1RCQ6_DANRE	A0A0G2L5R5_DANRE	A0A0R4IAX8_DANRE	A0A0R4IKR9_DANRE	A0A0R4IS63_DANRE
cellular_component	GO:0030141	secretory granule	11	38	0.289474	0.68213	0.407518	1	1	A5WWH0_DANRE	A0A0R4IIZ4_DANRE	A0A2R8RL72_DANRE	A0A0G2KQ55_DANRE	A3KPJ4_DANRE	F1QM13_DANRE	F1R8X1_DANRE	F1RAE9_DANRE	F1QHT8_DANRE	A0A0R4IQM9_DANRE	X1WH84_DANRE
biological_process	GO:0010976	positive regulation of neuron projection development	11	21	0.52381	0.999651	0.00105114	1	0.846	TEN3_DANRE	TEN4_DANRE	F1QKJ0_DANRE	B8JLJ1_DANRE	F1Q7S3_DANRE	F1QB19_DANRE	A0A0R4ITE7_DANRE	A0A0H2UKW5_DANRE	F1QKB5_DANRE	F6P1M3_DANRE	A0A0R4IMU5_DANRE
biological_process	GO:0006289	nucleotide-excision repair	11	38	0.289474	0.930088	0.115028	1	1	FAN1_DANRE	Q504I6_DANRE	Q66I03_DANRE	A5WWE3_DANRE	A0A286YAJ0_DANRE	A0A2R8QH82_DANRE	F1QHZ1_DANRE	Q1LWR3_DANRE	F1R685_DANRE	F1R096_DANRE	F8W2T2_DANRE
biological_process	GO:0050804	modulation of chemical synaptic transmission	11	69	0.15942	0.554863	0.49921	1	1	NTF7_DANRE	Q6NZ01_DANRE	E7F3J0_DANRE	A0A2R8QNW3_DANRE	R4GDN8_DANRE	F1QR36_DANRE	X1WEX9_DANRE	A0A0R4IGJ6_DANRE	A0A2R8QR28_DANRE	A0A2R8QL20_DANRE	A0A2R8QR73_DANRE
biological_process	GO:0055013	cardiac muscle cell development	11	30	0.366667	0.968582	0.0543349	1	1	ALPK2_DANRE	Q91430_DANRE	B3DGQ7_DANRE	F1QNL1_DANRE	A0A0R4IDZ8_DANRE	A0A1D5NS30_DANRE	A0A0R4ITE5_DANRE	F1Q6P8_DANRE	A2BGA7_DANRE	Q5U7N6_DANRE	A0A2R8QP40_DANRE
biological_process	GO:0140289	protein mono-ADP-ribosylation	11	19	0.578947	0.999677	0.00160732	1	0.942	A0A0G2L4M0_DANRE	A0A140LGI3_DANRE	B0UYL3_DANRE	A0A2R8Q5M8_DANRE	A0A0G2KLA5_DANRE	A0A2R8Q9E4_DANRE	A0A2R8Q7Y3_DANRE	A0A140LGQ8_DANRE	A0A0G2KFZ1_DANRE	A0A2R8RJW1_DANRE	A0A0R4IJ92_DANRE
cellular_component	GO:0030132	clathrin coat of coated pit	11	21	0.52381	0.997787	0.00688174	1	0.912	F1QIJ6_DANRE	F1QV21_DANRE	A0A286YA11_DANRE	A0A2R8QND0_DANRE	F1QF73_DANRE	A0A2R8RHR6_DANRE	E7FBE5_DANRE	A0A0G2L0S9_DANRE	F8W5C4_DANRE	A0A2R8RZ08_DANRE	A0A2R8QHH3_DANRE
molecular_function	GO:0008092	cytoskeletal protein binding	11	36	0.305556	1	1.35616e-30	1	0	Q8JFS7_DANRE	A0A2R8PWP1_DANRE	A0A2R8QJY8_DANRE	X1WBG6_DANRE	E9QIC8_DANRE	F1QBE0_DANRE	B8JHS0_DANRE	A0A2R8QNY7_DANRE	Q1MTL1_DANRE	K7N7D5_DANRE	F1QFY3_DANRE
biological_process	GO:0043153	entrainment of circadian clock by photoperiod	11	31	0.354839	0.950936	0.10247	1	1	A4QN37_DANRE	B3DJN2_DANRE	F1QUT1_DANRE	B3DK47_DANRE	Q7ZU53_DANRE	A0A0R4ICG0_DANRE	F1R1X1_DANRE	A0A2R8Q8Q0_DANRE	Q7SZZ4_DANRE	F1RDZ4_DANRE	F1R2R7_DANRE
biological_process	GO:0035418	protein localization to synapse	11	13	0.846154	0.999997	1.28521e-05	1	0.031	A0A2R8Q9B4_DANRE	A0A2R8QC86_DANRE	A0A0R4IGI4_DANRE	F1QC52_DANRE	A0A2R8QV60_DANRE	F1QTK1_DANRE	A0A2R8RX97_DANRE	A0A2R8QAU5_DANRE	A0A2R8PWJ7_DANRE	A0A2R8QIB9_DANRE	F6NYB5_DANRE
molecular_function	GO:0043548	phosphatidylinositol 3-kinase binding	11	17	0.647059	0.999917	0.00033965	1	0.211	E7FCJ4_DANRE	A0A2R8Q844_DANRE	Q1LWJ4_DANRE	F1QNX5_DANRE	A0A0R4IGP2_DANRE	A2BFQ2_DANRE	E7F4P8_DANRE	A0A286Y9P5_DANRE	E7F0F4_DANRE	A0A2R8QR15_DANRE	A0A2R8QM53_DANRE
cellular_component	GO:0098982	GABA-ergic synapse	11	12	0.916667	1	5.16409e-07	1	0.001	A0A2R8Q9B4_DANRE	A0A2R8QC86_DANRE	A0A0R4IGI4_DANRE	F1QC52_DANRE	A0A2R8QV60_DANRE	F1QTK1_DANRE	A0A2R8RX97_DANRE	A0A2R8QAU5_DANRE	A0A2R8PWJ7_DANRE	A0A2R8QIB9_DANRE	F6NYB5_DANRE
biological_process	GO:1904071	presynaptic active zone assembly	11	12	0.916667	1	1.42806e-06	1	0.006	A0A2R8Q9B4_DANRE	A0A2R8QC86_DANRE	A0A0R4IGI4_DANRE	F1QC52_DANRE	A0A2R8QV60_DANRE	F1QTK1_DANRE	A0A2R8RX97_DANRE	A0A2R8QAU5_DANRE	A0A2R8PWJ7_DANRE	A0A2R8QIB9_DANRE	F6NYB5_DANRE
cellular_component	GO:0032580	Golgi cisterna membrane	10	68	0.147059	0.0965296	0.947911	1	1	HACE1_DANRE	SIAT2_DANRE	F1QW63_DANRE	A1IH00_DANRE	F8W5E0_DANRE	F1Q679_DANRE	E7FE27_DANRE	F1QEX3_DANRE	E7F204_DANRE	F8W281_DANRE
biological_process	GO:0002088	lens development in camera-type eye	10	134	0.0746269	0.000310069	0.999864	0.268	1	INT7_DANRE	Q9YHZ8_DANRE	A0A0R4IQL7_DANRE	B0UXI3_DANRE	F1Q915_DANRE	A0A2R8QHQ3_DANRE	E7FBZ1_DANRE	A0A2R8PW73_DANRE	A0A0R4II20_DANRE	A0A0R4IW38_DANRE
cellular_component	GO:0043186	P granule	10	41	0.243902	0.760171	0.361588	1	1	PIWL2_DANRE	TRD7A_DANRE	TRD7B_DANRE	TDRD5_DANRE	TDRD1_DANRE	A0A2R8QE00_DANRE	X1WC78_DANRE	A0A2R8QQC4_DANRE	Q5VSI4_DANRE	A0A286YB87_DANRE
molecular_function	GO:0004521	endoribonuclease activity	10	38	0.263158	0.664916	0.441643	1	1	PIWL2_DANRE	Q5U3T4_DANRE	B8JJU9_DANRE	I3ISV3_DANRE	A0A2R8Q3L5_DANRE	F1QYL2_DANRE	A0A2R8RRH1_DANRE	F1QC40_DANRE	A0A2R8QC47_DANRE	F1Q6G0_DANRE
biological_process	GO:0007281	germ cell development	10	40	0.25	0.973275	0.0392391	1	1	TDRD1_DANRE	A0A2R8RZE4_DANRE	A8E7B8_DANRE	B0UYK4_DANRE	A0A2R8QGW9_DANRE	R4GEV4_DANRE	A0A2R8QRK5_DANRE	A0A2R8QF80_DANRE	F1R5M2_DANRE	A0A2R8QPQ1_DANRE
biological_process	GO:0039022	pronephric duct development	10	12	0.833333	0.999758	0.000998271	1	0.817	MIB1_DANRE	YAP1_DANRE	B3DHL7_DANRE	Q9PUT7_DANRE	B0CM22_DANRE	A4FTT4_DANRE	A0A2R8RKI9_DANRE	A4FTT3_DANRE	B0V1H1_DANRE	A0A0R4IT86_DANRE
molecular_function	GO:0004721	phosphoprotein phosphatase activity	10	53	0.188679	0.666067	0.377923	1	1	A2BE49_DANRE	Q7T2L8_DANRE	Q6NYH0_DANRE	X1WFY2_DANRE	E7FH10_DANRE	A0A2R8QGU0_DANRE	A0A0R4IAC0_DANRE	X1WCB8_DANRE	A0A0R4IE73_DANRE	A0A2R8RXU6_DANRE
biological_process	GO:0030100	regulation of endocytosis	10	38	0.263158	0.998631	0.00265143	1	0.981	Q7ZUY8_DANRE	F1QDL6_DANRE	A0A0G2L9G1_DANRE	E7FD40_DANRE	B0R118_DANRE	E9QF57_DANRE	A0A0R4IN54_DANRE	F1QDZ6_DANRE	E7FE23_DANRE	A0A0R4IWM7_DANRE
biological_process	GO:0035162	embryonic hemopoiesis	10	45	0.222222	0.979923	0.0310501	1	1	HEM0_DANRE	YAP1_DANRE	Q30JB6_DANRE	D0FH56_DANRE	B8ZHI7_DANRE	F1R904_DANRE	A0A2R8Q5A3_DANRE	F1QAD6_DANRE	B0UYS2_DANRE	B8A5K6_DANRE
biological_process	GO:0061515	myeloid cell development	10	30	0.333333	0.472374	0.614989	1	1	RN145_DANRE	NFIL3_DANRE	B8ZHI7_DANRE	E7FET3_DANRE	E7F716_DANRE	B8JL25_DANRE	A0A0R4IYD2_DANRE	A0A2R8QTK3_DANRE	E7F1P1_DANRE	X1WFV4_DANRE
biological_process	GO:0034220	ion transmembrane transport	10	157	0.0636943	2.55648e-12	1	0	1	Q0PJT8_DANRE	Q568M9_DANRE	E9QHL0_DANRE	A0A286Y9K8_DANRE	F1R5G4_DANRE	A0A140LGX8_DANRE	F1QHR2_DANRE	E7EYV5_DANRE	X1WH21_DANRE	X1WHX6_DANRE
biological_process	GO:1990573	potassium ion import across plasma membrane	10	90	0.111111	0.581441	0.50642	1	1	S12A9_DANRE	E7FGH1_DANRE	E9QC71_DANRE	E7F7K0_DANRE	A8WHX9_DANRE	F1QIE6_DANRE	X1WED4_DANRE	E7FD27_DANRE	A0A2R8RX62_DANRE	F1R5T1_DANRE
biological_process	GO:0048919	posterior lateral line neuromast development	10	32	0.3125	0.996271	0.00778643	1	1	F1R801_DANRE	F1R5S1_DANRE	E9QC71_DANRE	F1QTF2_DANRE	F6P1L8_DANRE	F1Q7K1_DANRE	A0A0R4IS11_DANRE	F1Q6T6_DANRE	A0A2R8RX62_DANRE	F1R5T1_DANRE
cellular_component	GO:0030426	growth cone	10	41	0.243902	0.267639	0.820816	1	1	CPEB4_DANRE	MY9AB_DANRE	IF2B1_DANRE	ELAV4_DANRE	A0A0B4J1A6_DANRE	A0A0R4IUL0_DANRE	A0A0R4IXJ1_DANRE	F1R133_DANRE	F8W4G8_DANRE	F1QGR7_DANRE
biological_process	GO:0031629	synaptic vesicle fusion to presynaptic active zone membrane	10	35	0.285714	0.739349	0.394539	1	1	Q6PHV0_DANRE	Q7ZV18_DANRE	A0A2R8RWS3_DANRE	A0A0R4IXG8_DANRE	A0A286Y9I3_DANRE	E7F2P0_DANRE	E9QC02_DANRE	Q1MTI1_DANRE	E9QEQ0_DANRE	A0A2R8QFW8_DANRE
cellular_component	GO:0005639	integral component of nuclear inner membrane	10	32	0.3125	0.92846	0.142053	1	1	TM201_DANRE	B0R182_DANRE	F1R4S0_DANRE	E7FGG7_DANRE	E7EZV6_DANRE	F1R1L9_DANRE	X1WHH7_DANRE	F1RBZ0_DANRE	E7FB83_DANRE	A0A2R8Q9A2_DANRE
biological_process	GO:0006334	nucleosome assembly	10	69	0.144928	0.0670448	0.960808	1	1	SPT2_DANRE	SART3_DANRE	A2CG09_DANRE	Q1LUU4_DANRE	A0A2R8PVA3_DANRE	X1WD98_DANRE	E7F336_DANRE	A0A2R8QPQ7_DANRE	F1QQQ8_DANRE	B7ZD47_DANRE
biological_process	GO:0071539	protein localization to centrosome	10	12	0.833333	0.999999	2.56695e-05	1	0.05	STIL_DANRE	E7F5N7_DANRE	A0A0R4IEX1_DANRE	A0A0R4INC9_DANRE	E9QDJ2_DANRE	F1QAL1_DANRE	A0A2R8RJB6_DANRE	F8W5U4_DANRE	A0A0R4IN23_DANRE	X1WC30_DANRE
biological_process	GO:0051225	spindle assembly	10	51	0.196078	0.998333	0.00310651	1	0.99	STIL_DANRE	CEP63_DANRE	B3DIU9_DANRE	Q08CD9_DANRE	D2XZ47_DANRE	F1RBF5_DANRE	A0A0R4IQR0_DANRE	A0A2R8Q1K1_DANRE	F6PFE9_DANRE	F1RCL4_DANRE
cellular_component	GO:0032154	cleavage furrow	10	51	0.196078	0.42605	0.703192	1	1	RFP4A_DANRE	RFIP3_DANRE	WDR73_DANRE	E7F7I3_DANRE	Q6TNS1_DANRE	A0A2R8QDD3_DANRE	A0A2R8QBM8_DANRE	A0A2R8RJF1_DANRE	A0A2R8Q2S7_DANRE	F1QWA6_DANRE
biological_process	GO:0006633	fatty acid biosynthetic process	10	50	0.2	0.0037308	0.998108	0.971	1	E7F5V3_DANRE	U3JAJ7_DANRE	F1QX79_DANRE	E7EY31_DANRE	A0A2R8QFY7_DANRE	E7F2S8_DANRE	A0A2R8QA86_DANRE	F1R7W6_DANRE	F1QM37_DANRE	A0A2R8Q0V2_DANRE
molecular_function	GO:0070006	metalloaminopeptidase activity	10	47	0.212766	0.514195	0.62474	1	1	E7F123_DANRE	Q6DGD8_DANRE	A0A0R4INQ5_DANRE	A0A2R8QBK0_DANRE	E9QJP7_DANRE	E9QIR0_DANRE	A0A0R4ILB1_DANRE	A0A2R8QL18_DANRE	A0A0R4IIN9_DANRE	A0A2R8Q716_DANRE
molecular_function	GO:0019838	growth factor binding	10	22	0.454545	0.955422	0.0663426	1	1	NRP1A_DANRE	RHDF1_DANRE	A8WH88_DANRE	A0A0R4IFP8_DANRE	F1QLT3_DANRE	Q1RLY9_DANRE	F1QXE5_DANRE	A0A2R8QHE8_DANRE	A0A2R8RMW2_DANRE	E7F1P1_DANRE
biological_process	GO:0060840	artery development	10	20	0.5	0.994114	0.0125738	1	1	O93616_DANRE	Q8JFB0_DANRE	A4FTT4_DANRE	A0A2R8RLC3_DANRE	F1QCA7_DANRE	A0A2R8Q7E4_DANRE	A4FTT3_DANRE	Q5SPB5_DANRE	F1QH44_DANRE	A5WUN6_DANRE
molecular_function	GO:0005507	copper ion binding	10	69	0.144928	0.0407727	0.980186	1	1	Q6NYT8_DANRE	A3KNN8_DANRE	U3JAH2_DANRE	A0A0R4IBQ7_DANRE	I3ITM6_DANRE	A0A0R4IHZ8_DANRE	F1QD91_DANRE	F1QXN1_DANRE	A0A0R4INL6_DANRE	F1QXL0_DANRE
molecular_function	GO:0004497	monooxygenase activity	10	52	0.192308	2.96953e-05	0.999987	0.003	1	C27C1_DANRE	MCA2B_DANRE	Q5TZD3_DANRE	Q7T1D7_DANRE	E7F3G8_DANRE	F6NN73_DANRE	H9KUX2_DANRE	A0A2U3TW39_DANRE	F1QHW0_DANRE	Q1LUX9_DANRE
cellular_component	GO:0005640	nuclear outer membrane	10	19	0.526316	0.999309	0.00317343	1	0.732	NAV3_DANRE	E7EZ30_DANRE	R4GDU6_DANRE	F1Q6N7_DANRE	F6NW82_DANRE	X1WGA9_DANRE	F8W2N1_DANRE	F1R7J6_DANRE	F1QC38_DANRE	R4GE14_DANRE
molecular_function	GO:0051287	NAD binding	10	72	0.138889	0.0027635	0.99886	0.624	1	GLYR1_DANRE	Q499A8_DANRE	A5PN55_DANRE	A0A0R4IFH8_DANRE	F8W4E9_DANRE	Q5RHR0_DANRE	A0A0R4IMF9_DANRE	A0A2R8QBA1_DANRE	F1QMW3_DANRE	F1QEY8_DANRE
biological_process	GO:0016575	histone deacetylation	10	48	0.208333	0.583566	0.53039	1	1	E7F0R9_DANRE	E7FFR7_DANRE	A5D6S0_DANRE	Q1LYM8_DANRE	F6P8Y5_DANRE	F1QTE0_DANRE	Q1MT18_DANRE	E7EYQ7_DANRE	A0A0R4IB58_DANRE	A0A2R8QJB8_DANRE
biological_process	GO:0042254	ribosome biogenesis	10	37	0.27027	0.000314831	0.999811	0.269	1	DLX2A_DANRE	Q6DRI5_DANRE	A9JR96_DANRE	A0A2R8QP10_DANRE	Q1LY17_DANRE	E9QCB3_DANRE	A0A286YB81_DANRE	R4GEV4_DANRE	A0A2R8QRK5_DANRE	A0A2R8QPQ1_DANRE
biological_process	GO:0001707	mesoderm formation	10	26	0.384615	0.973947	0.0472226	1	1	TBXTA_DANRE	A1IJT6_DANRE	Q98TU2_DANRE	F1Q9Z5_DANRE	B3DFN8_DANRE	Q9IAJ4_DANRE	A0A2R8QB37_DANRE	X1WGE3_DANRE	B3DKC1_DANRE	F1QAD6_DANRE
cellular_component	GO:0033017	sarcoplasmic reticulum membrane	10	34	0.294118	0.895793	0.191769	1	1	F1QCK4_DANRE	F8W5K5_DANRE	A0A0R4IKT8_DANRE	A0A2R8PWZ0_DANRE	F1QEX9_DANRE	Q5RGQ4_DANRE	A0A0R4IA72_DANRE	A0A2R8Q4H1_DANRE	A0A2R8QS07_DANRE	A0A0G2KQB9_DANRE
molecular_function	GO:0051018	protein kinase A binding	10	17	0.588235	0.940167	0.110385	1	1	SPKAP_DANRE	F2Z4T4_DANRE	E7EZX7_DANRE	A0A2R8RY64_DANRE	A0A2R8QBS2_DANRE	A0A2R8QNB9_DANRE	A0A0R4IC31_DANRE	E7F983_DANRE	A0A2R8Q9F2_DANRE	A0A2R8RYS1_DANRE
biological_process	GO:0048546	digestive tract morphogenesis	10	23	0.434783	0.999447	0.00150069	1	0.92	HN1BA_DANRE	MIB1_DANRE	F1QF98_DANRE	B3DFS9_DANRE	F1QKS0_DANRE	A0A286YAD0_DANRE	A0A0R4IPW9_DANRE	A0A2R8QGL1_DANRE	A0A0R4IB90_DANRE	F1QGL1_DANRE
biological_process	GO:0098508	endothelial to hematopoietic transition	10	20	0.5	0.9972	0.0103548	1	1	MTA70_DANRE	YTHD2_DANRE	E7F958_DANRE	A0A0R4IDE6_DANRE	A0A286YAQ6_DANRE	A0A2R8RZ82_DANRE	A0A2R8RJ10_DANRE	A0A2R8Q4R6_DANRE	A0A2R8Q5Y7_DANRE	F1Q834_DANRE
biological_process	GO:0031076	embryonic camera-type eye development	10	19	0.526316	0.393053	0.701472	1	1	NEST_DANRE	MIB1_DANRE	B3DKL9_DANRE	A0A2R8Q844_DANRE	Q1LWJ4_DANRE	A0A0R4ILR3_DANRE	A0A0R4IGP2_DANRE	A0A286Y9P5_DANRE	A0A2R8QR15_DANRE	A0A2R8QM53_DANRE
molecular_function	GO:0005520	insulin-like growth factor binding	10	43	0.232558	0.31389	0.795636	1	1	IBP2B_DANRE	Q2TTK0_DANRE	Q6DBR1_DANRE	A0A2R8Q844_DANRE	Q1LWJ4_DANRE	M9MM96_DANRE	A0A0R4IGP2_DANRE	A0A286Y9P5_DANRE	A0A2R8QR15_DANRE	A0A2R8QM53_DANRE
biological_process	GO:0045216	cell-cell junction organization	10	33	0.30303	0.953879	0.0631652	1	1	A0A2R8QB05_DANRE	B0UXH8_DANRE	F6PEN0_DANRE	E7FBB9_DANRE	A0A2R8QMK9_DANRE	E7F2W2_DANRE	A0A2R8Q396_DANRE	E7FE34_DANRE	E9QET4_DANRE	A0A1D5NSN9_DANRE
cellular_component	GO:0030672	synaptic vesicle membrane	10	76	0.131579	0.0219216	0.989059	0.994	1	B0UXI4_DANRE	E7F6Z3_DANRE	F1QVH9_DANRE	F1R275_DANRE	A0A0R4IF57_DANRE	A0A0R4IJU5_DANRE	A0A2R8QCE0_DANRE	A0A0G2L109_DANRE	A0A2R8PZY5_DANRE	A0A2R8QGT9_DANRE
biological_process	GO:0021952	central nervous system projection neuron axonogenesis	10	39	0.25641	0.53692	0.60492	1	1	KIF22_DANRE	Q498P3_DANRE	F1QBD4_DANRE	A0A0R4ILA5_DANRE	A0A0G2KXQ3_DANRE	A0A2R8QJW7_DANRE	F1RCR4_DANRE	A0A2R8QG72_DANRE	F1QFR3_DANRE	A2CEJ3_DANRE
biological_process	GO:0001966	thigmotaxis	10	35	0.285714	0.799568	0.322637	1	1	KIF22_DANRE	B0S8H2_DANRE	A1IH00_DANRE	A0A2R8QMN6_DANRE	F8W5E0_DANRE	F1REK0_DANRE	A0A0R4IR18_DANRE	F8W281_DANRE	A0A0H2UKL6_DANRE	F1R072_DANRE
molecular_function	GO:0005254	chloride channel activity	10	89	0.11236	0.00526386	0.9973	0.886	1	F1Q5F4_DANRE	A0A2R8Q7A1_DANRE	E9QHL0_DANRE	A0A0R4IKC5_DANRE	E7FF59_DANRE	A0A2R8RJ22_DANRE	F1QHR2_DANRE	A0A2R8Q9T0_DANRE	F1R8P4_DANRE	F1R5A1_DANRE
cellular_component	GO:0034451	centriolar satellite	10	22	0.454545	0.996655	0.0116456	1	0.998	CP131_DANRE	CE290_DANRE	ZMY10_DANRE	DZIP1_DANRE	E7F5N7_DANRE	F8W3F2_DANRE	A0A0R4INC9_DANRE	F8W5U4_DANRE	A0A0R4IN23_DANRE	X1WC30_DANRE
biological_process	GO:0018298	protein-chromophore linkage	10	73	0.136986	0.0220899	0.989986	1	1	OP1S2_DANRE	A4QN37_DANRE	Q1LVD8_DANRE	Q7ZU53_DANRE	F1R1X1_DANRE	F1Q8F2_DANRE	Q7SYI9_DANRE	A0A0R4IMF0_DANRE	A0A0R4IS22_DANRE	F1R2R7_DANRE
molecular_function	GO:0070628	proteasome binding	10	20	0.5	0.998511	0.00601879	1	0.991	BAG6_DANRE	PSM4A_DANRE	PSM4B_DANRE	ADRM1_DANRE	F1QHZ1_DANRE	A0A2R9YJG8_DANRE	T1ECT6_DANRE	A0A0R4IAF6_DANRE	F1QE31_DANRE	A0A0A0MPN8_DANRE
biological_process	GO:0055007	cardiac muscle cell differentiation	10	28	0.357143	0.978898	0.0354227	1	1	KLF1_DANRE	TBX5A_DANRE	Q9W6U0_DANRE	Q98873_DANRE	F1QNL1_DANRE	F6NVB1_DANRE	F8W4A9_DANRE	A0A0R4ITE5_DANRE	A2BGA7_DANRE	A0A2R8QP40_DANRE
biological_process	GO:0006406	mRNA export from nucleus	10	36	0.277778	0.637824	0.482819	1	1	NUP85_DANRE	GLE1_DANRE	F1QY90_DANRE	A0A0J9YJ24_DANRE	A0A0R4IDS3_DANRE	F1Q712_DANRE	A0A0R4IYL8_DANRE	A0A0R4ILC0_DANRE	B0S5L8_DANRE	Q5RI09_DANRE
cellular_component	GO:0034751	aryl hydrocarbon receptor complex	10	23	0.434783	0.994843	0.0166371	1	1	ARNT2_DANRE	F1RBN7_DANRE	A4IG25_DANRE	A0A2R8RSG0_DANRE	Q4U3K9_DANRE	A0A0R4IH97_DANRE	E7FDK6_DANRE	Q1LV27_DANRE	F1QVQ9_DANRE	E7F4H0_DANRE
cellular_component	GO:0097730	non-motile cilium	10	24	0.416667	0.857102	0.20169	1	1	DZIP1_DANRE	B0S6T1_DANRE	B0UYB0_DANRE	A0A2R8QMD0_DANRE	F1QVN7_DANRE	F1QSP6_DANRE	A0A2R8QRB2_DANRE	A0A2R8QDU7_DANRE	F6NUK4_DANRE	A0A2R8QMX9_DANRE
biological_process	GO:0050877	nervous system process	10	132	0.0757576	5.0251e-15	1	0	1	Q0PJT8_DANRE	Q568M9_DANRE	E9QHL0_DANRE	A0A286Y9K8_DANRE	F1R5G4_DANRE	A0A140LGX8_DANRE	F1QHR2_DANRE	E7EYV5_DANRE	X1WH21_DANRE	X1WHX6_DANRE
biological_process	GO:0071910	determination of liver left/right asymmetry	10	36	0.277778	0.770224	0.358353	1	1	GPR22_DANRE	A0A2R8QMD0_DANRE	A0A2R8RI11_DANRE	F1Q6J9_DANRE	F1QSP6_DANRE	A0A2R8QN32_DANRE	F1QAD6_DANRE	F1Q8L1_DANRE	F6NUK4_DANRE	F1QFD6_DANRE
cellular_component	GO:0080008	Cul4-RING E3 ubiquitin ligase complex	10	35	0.285714	0.952062	0.0936767	1	1	AMR1A_DANRE	AMR1B_DANRE	Q499B0_DANRE	E9QD96_DANRE	B0QZE8_DANRE	E7F3Z0_DANRE	A0A2R8QIS6_DANRE	A0A0R4IAU6_DANRE	E9QJL9_DANRE	E9QGZ8_DANRE
molecular_function	GO:0005248	voltage-gated sodium channel activity	10	41	0.243902	0.702271	0.434658	1	1	SC4AA_DANRE	A0A0R4IQC4_DANRE	X1WBF7_DANRE	E7F9F6_DANRE	A0A2R8Q1A5_DANRE	U3JA71_DANRE	F1QCC4_DANRE	A0A0R4IJX4_DANRE	F1RAM2_DANRE	A0A0R4IRK8_DANRE
biological_process	GO:0007064	mitotic sister chromatid cohesion	10	22	0.454545	0.964098	0.0767317	1	1	PDS5A_DANRE	Q6DRM9_DANRE	A0JMM5_DANRE	A0A0R4IU07_DANRE	B8JLA8_DANRE	A0A2R8QCL7_DANRE	E7F0X6_DANRE	F1QKC8_DANRE	F1QDE7_DANRE	X1WEJ1_DANRE
biological_process	GO:0001837	epithelial to mesenchymal transition	10	18	0.555556	0.999919	0.000215146	1	0.319	F1Q6T9_DANRE	F1R5S1_DANRE	O93599_DANRE	Q6NV46_DANRE	A0A1S6L757_DANRE	A0A0R4IGF2_DANRE	F1QKB6_DANRE	A0A286YBL8_DANRE	E9QF53_DANRE	E7EZN5_DANRE
cellular_component	GO:0048787	presynaptic active zone membrane	10	26	0.384615	0.995141	0.0141263	1	0.999	Q6PHV0_DANRE	Q7ZV18_DANRE	A0A2R8RWS3_DANRE	A0A0R4IXG8_DANRE	A0A286Y9I3_DANRE	E7F2P0_DANRE	E9QC02_DANRE	Q1MTI1_DANRE	E9QEQ0_DANRE	A0A2R8QFW8_DANRE
biological_process	GO:0001757	somite specification	10	23	0.434783	0.98909	0.0314436	1	1	DLLC_DANRE	IKKA_DANRE	Q6PBX3_DANRE	F1Q9Z5_DANRE	B3DFN8_DANRE	Q9IAJ4_DANRE	A4FTT3_DANRE	Q90466_DANRE	B3DKC1_DANRE	A0A2R8Q6M1_DANRE
biological_process	GO:0006644	phospholipid metabolic process	10	53	0.188679	0.000454321	0.999703	0.361	1	F1QH90_DANRE	F1QPQ0_DANRE	X1WD18_DANRE	A0A2R8PZJ4_DANRE	F1QD35_DANRE	E7F718_DANRE	E7F6W0_DANRE	A0A2R8Q2K8_DANRE	B0V0Y5_DANRE	E7F6N0_DANRE
molecular_function	GO:0003953	NAD+ nucleosidase activity	10	69	0.144928	0.0517828	0.974156	1	1	Q1LUQ2_DANRE	F1QY61_DANRE	A0A0R4IW15_DANRE	F1QY64_DANRE	A0A2R8QFY0_DANRE	A4JYJ7_DANRE	A0A0R4IGC9_DANRE	B8A691_DANRE	A0A2R8QA47_DANRE	A0A2R8QLW9_DANRE
molecular_function	GO:0008266	poly(U) RNA binding	10	23	0.434783	0.993867	0.019288	1	1	PABPA_DANRE	B8K0D5_DANRE	Q6TGY6_DANRE	A8E5B6_DANRE	A0A2R8PYS4_DANRE	A0A0R4IAW9_DANRE	A0A2R8QDJ4_DANRE	E7F112_DANRE	Q29R83_DANRE	A0A140LFZ6_DANRE
cellular_component	GO:0001518	voltage-gated sodium channel complex	10	58	0.172414	0.250124	0.843822	1	1	SC4AA_DANRE	A0A0R4IQC4_DANRE	X1WBF7_DANRE	E7F9F6_DANRE	A0A2R8Q1A5_DANRE	U3JA71_DANRE	F1QCC4_DANRE	A0A0R4IJX4_DANRE	F1RAM2_DANRE	A0A0R4IRK8_DANRE
biological_process	GO:0030719	P granule organization	10	17	0.588235	0.999571	0.00224064	1	0.978	TRD7A_DANRE	TRD7B_DANRE	TDRD5_DANRE	TDRD1_DANRE	DCTN2_DANRE	A0A2R8QE00_DANRE	X1WC78_DANRE	A0A2R8QQC4_DANRE	Q5VSI4_DANRE	A0A286YB87_DANRE
biological_process	GO:0035329	hippo signaling	10	37	0.27027	0.86874	0.20708	1	1	YAP1_DANRE	AMOL2_DANRE	B0S8I4_DANRE	E7F8Q6_DANRE	A0A2R8QF71_DANRE	E7FCE7_DANRE	B8A5S6_DANRE	E9QFX4_DANRE	A0A2R8QB11_DANRE	F1QGL3_DANRE
biological_process	GO:0021551	central nervous system morphogenesis	10	20	0.5	0.992756	0.0225159	1	1	ZRN1B_DANRE	UBP37_DANRE	B7ZDA8_DANRE	A0A2R8QB18_DANRE	A0A2R8RR17_DANRE	E9QC12_DANRE	F1RCS0_DANRE	E7FD72_DANRE	B7ZDA9_DANRE	F1Q6K1_DANRE
biological_process	GO:0071880	adenylate cyclase-activating adrenergic receptor signaling pathway	10	47	0.212766	0.316654	0.794431	1	1	Q8AWE0_DANRE	Q7T1A1_DANRE	C5NS01_DANRE	F1R1L1_DANRE	F1QG18_DANRE	X1WBR1_DANRE	X1WHT5_DANRE	A0A2R8Q6N5_DANRE	F1QQR5_DANRE	F1QPK9_DANRE
molecular_function	GO:0017022	myosin binding	10	31	0.322581	0.497071	0.624694	1	1	MYRIP_DANRE	A0A2R8QFR4_DANRE	E7FGK6_DANRE	F1QLX6_DANRE	A0A2R8RYY2_DANRE	E7EZF4_DANRE	F1R8E9_DANRE	A0A2R8Q3W1_DANRE	A0A0R4IDG7_DANRE	A0A2R8Q3P3_DANRE
cellular_component	GO:0036156	inner dynein arm	10	13	0.769231	0.999997	3.63676e-05	1	0.014	DNAI3_DANRE	F1R672_DANRE	A0A0R4IY79_DANRE	E9QBH9_DANRE	A0A0R4IHI4_DANRE	F1QB07_DANRE	A0A2R8Q6Y8_DANRE	E7FGS8_DANRE	A0A2R8QBQ8_DANRE	A0A2R8RL41_DANRE
cellular_component	GO:0030015	CCR4-NOT core complex	10	14	0.714286	0.99999	0.000102193	1	0.031	CNOT1_DANRE	A4QN63_DANRE	Q1LUD8_DANRE	A8E5K6_DANRE	E9QE21_DANRE	E9QGK5_DANRE	E9QCV7_DANRE	F1QFA6_DANRE	F1Q4L8_DANRE	A0A2R8QE33_DANRE
molecular_function	GO:0003691	double-stranded telomeric DNA binding	10	17	0.588235	0.999784	0.0012322	1	0.584	F1QRC8_DANRE	F1RAA7_DANRE	A0A2R8RLB9_DANRE	A0A2R8QFU0_DANRE	A0A2R8QGC2_DANRE	F8W411_DANRE	Q1L9E9_DANRE	A0A2R8Q2N7_DANRE	F1RBW1_DANRE	A0A2R8PV09_DANRE
biological_process	GO:0045595	regulation of cell differentiation	10	35	0.285714	0.999817	0.000250831	1	0.36	B2GM63_DANRE	B3DKD9_DANRE	A0A2R8RKY8_DANRE	A0A2R8RUJ4_DANRE	A0A0R4IQP3_DANRE	F1R5J3_DANRE	F1R272_DANRE	A0A2R8RJU0_DANRE	F6NS95_DANRE	E7F064_DANRE
biological_process	GO:0048790	maintenance of presynaptic active zone structure	10	13	0.769231	0.999993	8.70849e-05	1	0.153	B7ZVS4_DANRE	F8W2K0_DANRE	A0A0A0MPT1_DANRE	A0A2R8Q102_DANRE	F1QFN1_DANRE	A0A0R4IGY4_DANRE	A0A0R4IFV4_DANRE	A0A0R4IL25_DANRE	A0A0R4IEU4_DANRE	A0A0A0MPV1_DANRE
molecular_function	GO:0015175	neutral amino acid transmembrane transporter activity	10	45	0.222222	0.0384469	0.980843	1	1	F1QFT4_DANRE	Q6P4V2_DANRE	D7RVS0_DANRE	A0A0R4IP58_DANRE	F1R7H3_DANRE	A0A2R8QSV3_DANRE	F1QCB3_DANRE	E9QGE5_DANRE	F1Q5Y9_DANRE	A0A0G2L611_DANRE
molecular_function	GO:0005545	1-phosphatidylinositol binding	10	27	0.37037	0.975573	0.0597686	1	1	Q6AXI5_DANRE	E7F6D8_DANRE	F1QKW9_DANRE	R4GDY5_DANRE	F8W5M9_DANRE	A0A286YBQ2_DANRE	A0A286YAZ9_DANRE	A0A2R8QHW2_DANRE	A0A2R8QK11_DANRE	F8W4F2_DANRE
biological_process	GO:0033173	calcineurin-NFAT signaling cascade	10	20	0.5	0.9972	0.0103548	1	1	E7F069_DANRE	A0A2R8QGW7_DANRE	A0A0R4IEG2_DANRE	E7F9Z5_DANRE	F1QXN5_DANRE	F1QMI6_DANRE	A0A2R8RKG0_DANRE	A0A0R4IIR4_DANRE	E7F059_DANRE	E7FE12_DANRE
biological_process	GO:0007216	G protein-coupled glutamate receptor signaling pathway	10	38	0.263158	0.707197	0.430874	1	1	S5UFP7_DANRE	A1L1T5_DANRE	E7F0B3_DANRE	F6P3F9_DANRE	B8JIC5_DANRE	E7FDG8_DANRE	A0A0R4INT7_DANRE	A0A2R8QE21_DANRE	A0A2R8Q244_DANRE	F1Q5Q6_DANRE
biological_process	GO:0060389	pathway-restricted SMAD protein phosphorylation	10	18	0.555556	0.70837	0.384752	1	1	Q1RLX1_DANRE	B3DJG0_DANRE	F1R4W7_DANRE	F1R7N7_DANRE	F1Q5T5_DANRE	A0A286YBQ8_DANRE	A0A0R4IQK3_DANRE	A0A2R8QFJ1_DANRE	A0A2R8PVB4_DANRE	A0A2R8PZ52_DANRE
biological_process	GO:0030837	negative regulation of actin filament polymerization	10	23	0.434783	0.998797	0.00225316	1	0.978	F1R5D2_DANRE	X1WFY2_DANRE	E7F3U4_DANRE	E7FH10_DANRE	A0A2R8QGU0_DANRE	F1QCY5_DANRE	A0A0R4IAC0_DANRE	A0A2R8RXU6_DANRE	B0V1L6_DANRE	F1QZZ7_DANRE
molecular_function	GO:0019894	kinesin binding	10	27	0.37037	0.975573	0.0597686	1	1	A0A2R9YJG3_DANRE	B0UYB0_DANRE	D3KVM2_DANRE	F1QVN7_DANRE	A0A2R8QRB2_DANRE	F1R9S8_DANRE	A0A2R8QDU7_DANRE	A0A286Y9Q5_DANRE	F1QJA1_DANRE	E7F049_DANRE
molecular_function	GO:0031697	beta-1 adrenergic receptor binding	10	11	0.909091	1	2.68156e-06	1	0.002	A0A2R8RHW5_DANRE	A0A2R8Q8D8_DANRE	F1Q897_DANRE	A0A2R8QJF4_DANRE	Q5VSD9_DANRE	A0A2R8PV45_DANRE	A0A2R8QBW2_DANRE	A0A2R8QD15_DANRE	E7FH65_DANRE	A0A2R8QII5_DANRE
molecular_function	GO:0070699	type II activin receptor binding	10	11	0.909091	1	2.68156e-06	1	0.002	A0A2R8RHW5_DANRE	A0A2R8Q8D8_DANRE	F1Q897_DANRE	A0A2R8QJF4_DANRE	Q5VSD9_DANRE	A0A2R8PV45_DANRE	A0A2R8QBW2_DANRE	A0A2R8QD15_DANRE	E7FH65_DANRE	A0A2R8QII5_DANRE
molecular_function	GO:0005219	ryanodine-sensitive calcium-release channel activity	10	11	0.909091	1	2.68156e-06	1	0.002	F1QCK4_DANRE	F8W5K5_DANRE	A0A0R4IKT8_DANRE	A0A2R8PWZ0_DANRE	F1QEX9_DANRE	Q5RGQ4_DANRE	A0A0R4IA72_DANRE	A0A2R8Q4H1_DANRE	A0A2R8QS07_DANRE	A0A0G2KQB9_DANRE
molecular_function	GO:0004519	endonuclease activity	9	34	0.264706	0.859583	0.187521	1	1	DCR1C_DANRE	Q7M558_DANRE	A5PM73_DANRE	Q7M559_DANRE	A0A2R8QGS8_DANRE	F1QR97_DANRE	F1QQM4_DANRE	A2CF03_DANRE	A0A2R8QI59_DANRE
molecular_function	GO:0051864	histone H3-methyl-lysine-36 demethylase activity	9	14	0.642857	0.999876	0.000901307	1	0.532	PHF8_DANRE	A0A2R8RU42_DANRE	A0A2R8RHT9_DANRE	A0A2R8Q4T8_DANRE	A0A2R8QQQ0_DANRE	F1QPD2_DANRE	F1QNG0_DANRE	I3ITH4_DANRE	A0A2R8QE74_DANRE
biological_process	GO:0009968	negative regulation of signal transduction	9	40	0.225	0.998678	0.00172162	1	0.948	B0EVP9_DANRE	A0A2R8Q2X0_DANRE	A0A0R4IFZ8_DANRE	Q38JL1_DANRE	A0A2R8Q7V8_DANRE	J9JI18_DANRE	F1QI15_DANRE	L0N8W2_DANRE	A0A2R8S0B6_DANRE
biological_process	GO:0032465	regulation of cytokinesis	9	29	0.310345	0.99922	0.00195295	1	0.951	PLK4_DANRE	BECN1_DANRE	RFP4A_DANRE	RFIP3_DANRE	A0A0R4I9S3_DANRE	X1WF03_DANRE	F1QHY3_DANRE	F1Q7V0_DANRE	A0A140LFQ5_DANRE
biological_process	GO:0010951	negative regulation of endopeptidase activity	9	59	0.152542	0.978898	0.0354227	1	1	Q8JH29_DANRE	Q7T309_DANRE	F1R7D6_DANRE	F8W475_DANRE	Q1MT21_DANRE	F1QLQ5_DANRE	Q1LUV0_DANRE	X1WDY3_DANRE	F1QHG3_DANRE
biological_process	GO:0090309	positive regulation of DNA methylation-dependent heterochromatin assembly	9	15	0.6	0.999438	0.00311742	1	0.993	STB1A_DANRE	MCAF1_DANRE	STB1B_DANRE	E7EZC0_DANRE	F6NW08_DANRE	E9QCF9_DANRE	F1QTL6_DANRE	A0A2R8QS35_DANRE	A0A2R8PZS5_DANRE
biological_process	GO:0007265	Ras protein signal transduction	9	49	0.183673	0.993471	0.00877557	1	1	STB1A_DANRE	STB1B_DANRE	Q6DHN7_DANRE	A0A2R8QB47_DANRE	A0A2R8QMH0_DANRE	A0A286YAS8_DANRE	F1QFI3_DANRE	A0A2R8S0E6_DANRE	A0A0R4IHD1_DANRE
biological_process	GO:0032508	DNA duplex unwinding	9	33	0.272727	0.404853	0.722816	1	1	SUV3_DANRE	ASCC3_DANRE	NBN_DANRE	DDX11_DANRE	A0A0R4IHR6_DANRE	E7F8R0_DANRE	A0A2R8QQ92_DANRE	A0A0R4IT14_DANRE	F8W411_DANRE
biological_process	GO:0001503	ossification	9	57	0.157895	0.0399767	0.974715	1	1	WNT5B_DANRE	AGRG6_DANRE	B6V3E1_DANRE	B3DKD9_DANRE	Q0H1F4_DANRE	F1Q9F4_DANRE	E9QEY0_DANRE	F1R272_DANRE	F8W542_DANRE
biological_process	GO:0030917	midbrain-hindbrain boundary development	9	40	0.225	0.492452	0.626053	1	1	RN152_DANRE	PO5F1_DANRE	OTX2_DANRE	PAX2A_DANRE	Q803K8_DANRE	Q6W4T8_DANRE	I3ISQ9_DANRE	F8W4Z3_DANRE	A0A0R4IWH7_DANRE
biological_process	GO:0032436	positive regulation of proteasomal ubiquitin-dependent protein catabolic process	9	51	0.176471	0.312453	0.789663	1	1	SH3R1_DANRE	Q7ZTZ6_DANRE	Q7T355_DANRE	A8WIS6_DANRE	A0A0R4ILG6_DANRE	Q1LUI6_DANRE	A0A2R8PZ38_DANRE	F1QHB4_DANRE	A0A2R9YJN1_DANRE
biological_process	GO:0060322	head development	9	26	0.346154	0.998501	0.00192899	1	0.95	CE290_DANRE	CCD32_DANRE	WDR11_DANRE	CHD8_DANRE	F1Q8J4_DANRE	E9QH15_DANRE	F1Q6N0_DANRE	E7FGW2_DANRE	E9QFC1_DANRE
cellular_component	GO:0071339	MLL1 complex	9	29	0.310345	0.917907	0.164137	1	1	RUVB2_DANRE	CHD8_DANRE	F1QL52_DANRE	A0A2R8Q6N1_DANRE	F1Q750_DANRE	A8HAK1_DANRE	A8WIP5_DANRE	E7FH24_DANRE	F8W578_DANRE
biological_process	GO:0032259	methylation	9	67	0.134328	0.017933	0.987323	1	1	ARMT1_DANRE	PRD10_DANRE	A0A0R4IF41_DANRE	A3KNM1_DANRE	E7FAN3_DANRE	A0A2R8QKD3_DANRE	A2BG51_DANRE	F1R3R6_DANRE	F1Q8L8_DANRE
biological_process	GO:0048702	embryonic neurocranium morphogenesis	9	35	0.257143	0.677363	0.471359	1	1	SC23A_DANRE	MED12_DANRE	Q6AZ98_DANRE	B6V3E1_DANRE	A0A2R8QHE8_DANRE	B8A5T9_DANRE	F1R7W8_DANRE	A0A0G2L2B8_DANRE	F1Q834_DANRE
cellular_component	GO:0005881	cytoplasmic microtubule	9	44	0.204545	0.66804	0.45373	1	1	CLAP2_DANRE	A0A2R9YJG3_DANRE	D3KVM2_DANRE	A0A2R8QMH8_DANRE	A0A0R4IQR0_DANRE	A8WHM7_DANRE	A0A2R8QHA2_DANRE	E7F615_DANRE	F1R253_DANRE
biological_process	GO:0007059	chromosome segregation	9	75	0.12	0.994172	0.00820212	1	1	SPC24_DANRE	TLK2_DANRE	NEK8_DANRE	NDC80_DANRE	F1Q687_DANRE	F1QCQ0_DANRE	A0A2R8S0I9_DANRE	A0A2R8QNP6_DANRE	E9QIT3_DANRE
molecular_function	GO:0046975	histone methyltransferase activity (H3-K36 specific)	9	19	0.473684	0.996246	0.0139068	1	1	SETD3_DANRE	PRDM9_DANRE	F1QV68_DANRE	A0A2R8Q1Y5_DANRE	F1QJI9_DANRE	A0A2R8QFE1_DANRE	F1RD01_DANRE	A0A2R8QDW6_DANRE	A0A2R8Q6N6_DANRE
molecular_function	GO:0005267	potassium channel activity	9	29	0.310345	0.690039	0.362468	1	1	B3DJX4_DANRE	A0A2R8QS38_DANRE	E9QJ94_DANRE	A8WHX9_DANRE	X1WEB3_DANRE	A0A2R8PXD8_DANRE	A0A2R8QKP5_DANRE	A0A2R8PYU3_DANRE	A0A2R8QPX1_DANRE
molecular_function	GO:0031625	ubiquitin protein ligase binding	9	95	0.0947368	0.000887601	0.999699	0.25	1	Q6ZM71_DANRE	Q6PBZ7_DANRE	A0A140LGA1_DANRE	E7F4Z9_DANRE	A0A0M3HEL3_DANRE	F6NY94_DANRE	B0UXK1_DANRE	E7FBZ8_DANRE	A5PMG2_DANRE
biological_process	GO:0006890	retrograde vesicle-mediated transport, Golgi to endoplasmic reticulum	9	54	0.166667	0.118018	0.937014	1	1	COG4_DANRE	NBAS_DANRE	B0R066_DANRE	F1RBH5_DANRE	A0A2R8RUW2_DANRE	A0A2R8RKF4_DANRE	B0R171_DANRE	Q5RGZ9_DANRE	F1R7S1_DANRE
molecular_function	GO:0051087	chaperone binding	9	67	0.134328	0.0488193	0.976633	1	1	CD37L_DANRE	Q7ZTZ6_DANRE	Q6P0U6_DANRE	A0A0G2L6F9_DANRE	B0V1J6_DANRE	F1Q8K3_DANRE	B8JJ17_DANRE	A0A2R8RP68_DANRE	B8A4V9_DANRE
molecular_function	GO:0045504	dynein heavy chain binding	9	28	0.321429	0.924978	0.153284	1	1	DNAI3_DANRE	A7MD87_DANRE	A1A5Y4_DANRE	A0A1D5NS24_DANRE	A0A0R4IGE5_DANRE	A0A0R4IUW7_DANRE	A0A0R4IXD8_DANRE	E9QDC0_DANRE	F1QBY7_DANRE
molecular_function	GO:0045503	dynein light chain binding	9	18	0.5	0.99778	0.00909753	1	1	DNAI3_DANRE	A7MD87_DANRE	A1A5Y4_DANRE	A0A1D5NS24_DANRE	A0A0R4IGE5_DANRE	A0A0R4IUW7_DANRE	A0A0R4IXD8_DANRE	E9QDC0_DANRE	F1QBY7_DANRE
biological_process	GO:0002098	tRNA wobble uridine modification	9	26	0.346154	0.89753	0.191015	1	1	GTPB3_DANRE	CTU2_DANRE	ELP5_DANRE	KTI12_DANRE	A0A0R4IWA5_DANRE	A0A2R8S0B3_DANRE	F1R509_DANRE	E9QII1_DANRE	A0A2R8QLA8_DANRE
cellular_component	GO:0009898	cytoplasmic side of plasma membrane	9	32	0.28125	1.85343e-05	0.999992	0.001	1	Q8JFS7_DANRE	A0A2R8PWP1_DANRE	A0A2R8QJY8_DANRE	F1QBE0_DANRE	Q1MTL1_DANRE	F6NY94_DANRE	B0UXK1_DANRE	K7N7D5_DANRE	F1QFY3_DANRE
biological_process	GO:0006900	vesicle budding from membrane	9	32	0.28125	0.999078	0.00207513	1	0.962	CHMP7_DANRE	Q6AXI5_DANRE	F1QKW9_DANRE	F8W5M9_DANRE	A0A286YBQ2_DANRE	A0A286YAZ9_DANRE	A0A2R8QHW2_DANRE	A0A2R8QK11_DANRE	F8W4F2_DANRE
cellular_component	GO:0000775	chromosome, centromeric region	9	31	0.290323	0.989807	0.0158631	1	1	CP131_DANRE	Q1LUU4_DANRE	A0A0R4IN88_DANRE	A0A286Y8J7_DANRE	F1QQQ8_DANRE	A0A2R8PZ46_DANRE	B8JK99_DANRE	F1Q7X5_DANRE	A0A2R8RU11_DANRE
biological_process	GO:0007179	transforming growth factor beta receptor signaling pathway	9	58	0.155172	0.0542342	0.968958	1	1	Q8JFB0_DANRE	E7FFZ5_DANRE	A0A2R8RLV5_DANRE	Q1L8R8_DANRE	F1R1J6_DANRE	F1RC55_DANRE	F8W4A6_DANRE	F1QS48_DANRE	F1QH44_DANRE
biological_process	GO:0032402	melanosome transport	9	42	0.214286	0.39508	0.73688	1	1	CP131_DANRE	BBS2_DANRE	Q52WY2_DANRE	F1REQ6_DANRE	E9QDJ5_DANRE	A0A2R8Q2U1_DANRE	F1Q6W8_DANRE	A0A0R4IVI6_DANRE	E7EXH4_DANRE
biological_process	GO:0050896	response to stimulus	9	59	0.152542	0.884411	0.120972	1	1	EYS_DANRE	KERA_DANRE	X1WG23_DANRE	F1QDH9_DANRE	A0A0G2L1F5_DANRE	F8W4C0_DANRE	A0A286YBM4_DANRE	F1QXB0_DANRE	F1RAJ1_DANRE
biological_process	GO:0048752	semicircular canal morphogenesis	9	27	0.333333	0.950936	0.10247	1	1	HN1BA_DANRE	Q90XD1_DANRE	A0A2R8Q844_DANRE	Q1LWJ4_DANRE	A0A0R4IGP2_DANRE	A0A286YAF1_DANRE	A0A286Y9P5_DANRE	A0A2R8QR15_DANRE	A0A2R8QM53_DANRE
biological_process	GO:0045879	negative regulation of smoothened signaling pathway	9	35	0.257143	0.818266	0.292803	1	1	KIF7_DANRE	PTC1_DANRE	REST_DANRE	A0A2R8Q5A2_DANRE	F1R8E2_DANRE	F6NIQ9_DANRE	F1QHX5_DANRE	F1QQN6_DANRE	E7F226_DANRE
biological_process	GO:0097150	neuronal stem cell population maintenance	9	12	0.75	0.999974	0.000281582	1	0.393	B3DJD1_DANRE	O93616_DANRE	A0A2R8QM70_DANRE	F1QCA7_DANRE	A0A2R8QH43_DANRE	A0A2R8QI31_DANRE	F1QZF2_DANRE	A0A2R8Q5T2_DANRE	A5WUN6_DANRE
biological_process	GO:0060828	regulation of canonical Wnt signaling pathway	9	39	0.230769	0.826044	0.216684	1	1	ZN703_DANRE	AMER1_DANRE	A0A2R9YJG3_DANRE	D3KVM2_DANRE	A0A2R8QMD0_DANRE	F1QSP6_DANRE	X1WHB3_DANRE	A0A0R4IT13_DANRE	F6NUK4_DANRE
biological_process	GO:0036159	inner dynein arm assembly	9	15	0.6	0.999438	0.00311742	1	0.993	DAAF1_DANRE	CCD39_DANRE	ZMY10_DANRE	DNAI3_DANRE	A0A2R8RI11_DANRE	F1Q654_DANRE	A0A2R8Q441_DANRE	A0A0G2L8X4_DANRE	F1QFD6_DANRE
biological_process	GO:0006811	ion transport	9	39	0.230769	1.57107e-21	1	0	1	Q6NYJ1_DANRE	Q1LY45_DANRE	E7FAT2_DANRE	F1QW20_DANRE	F1QU06_DANRE	A0A0R4INU5_DANRE	Q1LY44_DANRE	A0A0R4IC13_DANRE	F1QND4_DANRE
biological_process	GO:0021508	floor plate formation	9	20	0.45	0.989645	0.0320985	1	1	MIB1_DANRE	B0S6T1_DANRE	B0S8H2_DANRE	A0A2R8QMN6_DANRE	F1QH64_DANRE	F1REK0_DANRE	B8A5N9_DANRE	F1QAC4_DANRE	A0A2R8QMX9_DANRE
biological_process	GO:0021522	spinal cord motor neuron differentiation	9	35	0.257143	0.944225	0.0989209	1	1	CLP1_DANRE	B3DGA5_DANRE	A0A2R8Q844_DANRE	Q1LWJ4_DANRE	F6NUE7_DANRE	A0A0R4IGP2_DANRE	A0A286Y9P5_DANRE	A0A2R8QR15_DANRE	A0A2R8QM53_DANRE
molecular_function	GO:0001965	G-protein alpha-subunit binding	9	20	0.45	0.993981	0.0203607	1	1	DAPLE_DANRE	AGRV1_DANRE	A0A0R4IFF8_DANRE	F1QAG9_DANRE	A0A0R4IQ86_DANRE	A0A0R4IJR6_DANRE	A0A140LG62_DANRE	A0A140LFR2_DANRE	A0A0R4IL00_DANRE
biological_process	GO:1990798	pancreas regeneration	9	29	0.310345	0.863859	0.245721	1	1	HN1BA_DANRE	F1RCH4_DANRE	F1RDU4_DANRE	E7F921_DANRE	A0A0R4IU95_DANRE	F1QF92_DANRE	E7F6N6_DANRE	F1QB13_DANRE	F1R6Q4_DANRE
molecular_function	GO:0004620	phospholipase activity	9	50	0.18	0.0317151	0.979875	1	1	A0A0R4IDW9_DANRE	X1WER6_DANRE	A0A2R8QGH7_DANRE	A8E7C9_DANRE	F1QCK0_DANRE	A0A2R8PZV0_DANRE	E7F006_DANRE	A0A2R8PY93_DANRE	A0A0R4IGS2_DANRE
biological_process	GO:0021654	rhombomere boundary formation	9	20	0.45	0.989645	0.0320985	1	1	MIB1_DANRE	RFNG_DANRE	MED12_DANRE	O93616_DANRE	F1QCA7_DANRE	A0A2R8QH43_DANRE	F1QZF2_DANRE	A0A2R8Q5T2_DANRE	A5WUN6_DANRE
molecular_function	GO:0008237	metallopeptidase activity	9	54	0.166667	0.00122071	0.999232	0.335	1	EI3HB_DANRE	MYSM1_DANRE	E9QCK7_DANRE	E7F3M4_DANRE	E7F6J8_DANRE	A0A0R4J8E6_DANRE	E7FFA5_DANRE	A0A2R8RMC3_DANRE	A0A286YA65_DANRE
biological_process	GO:0007088	regulation of mitotic nuclear division	9	21	0.428571	0.710928	0.386994	1	1	E7FAN6_DANRE	A2CEF0_DANRE	A0A2R8RQW0_DANRE	X1WGN9_DANRE	A0A2R8QJ09_DANRE	A0A0B4J1A5_DANRE	E9QEH8_DANRE	A0A286Y9L2_DANRE	A0A0R4IRM2_DANRE
molecular_function	GO:0003746	translation elongation factor activity	9	53	0.169811	0.224647	0.866178	1	1	Q6PEG4_DANRE	A0A0R4IS28_DANRE	A0A2R8Q469_DANRE	A0A2R8PVC9_DANRE	F1QQW9_DANRE	A0A0R4IE10_DANRE	A0A0R4IK64_DANRE	A0A0R4IA30_DANRE	A0A0R4IGB6_DANRE
biological_process	GO:0048193	Golgi vesicle transport	9	18	0.5	0.711302	0.333939	1	1	GOGA5_DANRE	Q567Y3_DANRE	A0A2R8QGL3_DANRE	A0A2R8QTW5_DANRE	F1Q966_DANRE	A0A2R8RKH5_DANRE	A0A2R8QT36_DANRE	A0A2R8QEB2_DANRE	E7FEK9_DANRE
biological_process	GO:0007062	sister chromatid cohesion	9	27	0.333333	0.975898	0.043479	1	1	MCMBP_DANRE	Q6DRM9_DANRE	A0A2R8QCL7_DANRE	E7FA81_DANRE	E7F0X6_DANRE	A0A0R4IAV1_DANRE	A0A2R8RLC0_DANRE	X1WEJ1_DANRE	X1WEK0_DANRE
biological_process	GO:0071600	otic vesicle morphogenesis	9	16	0.5625	0.993804	0.0134197	1	1	CRBN_DANRE	DLX3B_DANRE	DLX4B_DANRE	F1QNU4_DANRE	B3DG00_DANRE	Q90XD1_DANRE	Q6DBY3_DANRE	E9QJ32_DANRE	F1QWY1_DANRE
biological_process	GO:0035735	intraciliary transport involved in cilium assembly	9	12	0.75	0.999974	0.000281582	1	0.393	CP131_DANRE	E7F5N7_DANRE	A0A286YA69_DANRE	A0A0R4INC9_DANRE	F1QMA4_DANRE	E7FAG4_DANRE	F8W5U4_DANRE	A0A0R4IN23_DANRE	E7EZE3_DANRE
[truncated: 9,179 more rows]
[truncated: 2,030 more columns]

## Sheet: polyQ
GO domain	GO ID	GO term	polyQ protein	total number	number / total	raw p-value under-representation	raw p-value over-representation	FWER under-representation	FWER over-representation	Gene Name
[truncated: 10,142 more rows]
[truncated: 756 more columns]

[truncated: 20 more sheets: polyQ⁄N, polyN, polyY, polyW, polyC, polyP, polyA, polyS, polyT, polyD, polyE, polyG, polyF, polyH, polyI, polyL, polyV, polyM, polyR, polyK]
