# Supplementary material for: Noncanonical usage of stop codons in ciliates expands proteins with Q-rich motifs
Source: bioRxiv preprint, doi:10.1101/2020.12.08.407247, version 3 (2023-11-13)
Supplement: Dataset DS30 [file 407247_file44.xlsx]

## Sheet: SCD
GO domain	GO ID	GO term	SCD protein	total number	number / total	raw p-value under-representation	raw p-value over-representation	FWER under-representation	FWER over-representation	Gene Name
biological_process	GO:0006357	regulation of transcription by RNA polymerase II	637	1851	0.344138	1	1.45251e-81	1	0	MED17_HUMAN	NANP8_HUMAN	PHF14_HUMAN	PHF2_HUMAN	MINT_HUMAN	PAX2_HUMAN	PBX1_HUMAN	P20L1_HUMAN	TAF6L_HUMAN	TAF6_HUMAN	PO2F3_HUMAN	TIAR_HUMAN	RUNX2_HUMAN	NF2L2_HUMAN	SNW1_HUMAN	TRRAP_HUMAN	TNIP3_HUMAN	SP3_HUMAN	SMRD1_HUMAN	TT21B_HUMAN	SALL1_HUMAN	TAF1L_HUMAN	CPHL2_HUMAN	HIF1A_HUMAN	LRRF1_HUMAN	MDEAS_HUMAN	GRHL2_HUMAN	LMX1B_HUMAN	MASTR_HUMAN	MAZ_HUMAN	ARNT2_HUMAN	DLX4_HUMAN	HTF4_HUMAN	JHD2C_HUMAN	BRWD3_HUMAN	BAZ1B_HUMAN	BAZ2B_HUMAN	IRF8_HUMAN	DUXA_HUMAN	IKZF5_HUMAN
biological_process	GO:0006355	regulation of transcription, DNA-templated	472	1865	0.253083	1	1.10762e-80	1	0	BRD4_HUMAN	PHF12_HUMAN	REXO4_HUMAN	TAF6L_HUMAN	TRRAP_HUMAN	RNF6_HUMAN	SP3_HUMAN	SRRT_HUMAN	HIF1A_HUMAN	MAGD1_HUMAN	LMX1B_HUMAN	ARNT2_HUMAN	DLX4_HUMAN	JHD2C_HUMAN	JIP1_HUMAN	KAT6A_HUMAN	BNC2_HUMAN	ACVL1_HUMAN	AIRE_HUMAN	HMGA1_HUMAN	HCLS1_HUMAN	GPBP1_HUMAN	NFE4_HUMAN	DAXX_HUMAN	INSR_HUMAN	NOTC1_HUMAN	ELAV2_HUMAN	FUS_HUMAN	GON4L_HUMAN	CLOCK_HUMAN	MIER1_HUMAN	BAZ2A_HUMAN	BPTF_HUMAN	EGLN_HUMAN	ING3_HUMAN	APBB1_HUMAN	ATF7_HUMAN	CHD7_HUMAN	E2F1_HUMAN	ARID2_HUMAN
biological_process	GO:0045944	positive regulation of transcription by RNA polymerase II	346	1088	0.318015	1	1.34312e-33	1	0	BRD4_HUMAN	MED17_HUMAN	PER1_HUMAN	PHF10_HUMAN	PAX2_HUMAN	PBX1_HUMAN	PO2F3_HUMAN	SENP2_HUMAN	TMF1_HUMAN	RUNX2_HUMAN	NF2L2_HUMAN	SNW1_HUMAN	SENP1_HUMAN	TR150_HUMAN	PTPRN_HUMAN	TP53B_HUMAN	SP3_HUMAN	RIPK2_HUMAN	SSBP4_HUMAN	SALL1_HUMAN	HIF1A_HUMAN	LRP5_HUMAN	LRP6_HUMAN	CRTC1_HUMAN	GRHL2_HUMAN	HGF_HUMAN	LMX1B_HUMAN	MASTR_HUMAN	ARNT2_HUMAN	HTF4_HUMAN	KAT6A_HUMAN	ACVL1_HUMAN	AIRE_HUMAN	HMGA1_HUMAN	LMO7_HUMAN	IRF8_HUMAN	LDB2_HUMAN	KDM6B_HUMAN	HCLS1_HUMAN	GPBP1_HUMAN
biological_process	GO:0007165	signal transduction	311	1532	0.203003	1	5.66285e-09	1	0	PECA1_HUMAN	PDE11_HUMAN	PDE2A_HUMAN	PDE3B_HUMAN	PDE4B_HUMAN	PDE4D_HUMAN	PDE8B_HUMAN	PCNT_HUMAN	SRGEF_HUMAN	MKLN1_HUMAN	RAPH1_HUMAN	RASF5_HUMAN	RASL3_HUMAN	RBPJL_HUMAN	TAGAP_HUMAN	PSD1_HUMAN	RHGBA_HUMAN	SIGL8_HUMAN	TRAIP_HUMAN	TRI55_HUMAN	TRI63_HUMAN	TNR8_HUMAN	STK39_HUMAN	TOM1_HUMAN	SH3G2_HUMAN	RIPK2_HUMAN	SRGP2_HUMAN	STML3_HUMAN	STK24_HUMAN	HIF1A_HUMAN	LIPA1_HUMAN	LRRD1_HUMAN	MAPK5_HUMAN	MAGI1_HUMAN	GRB14_HUMAN	KALRN_HUMAN	LRP12_HUMAN	M3K6_HUMAN	ITPR1_HUMAN	KI2L4_HUMAN
biological_process	GO:0000122	negative regulation of transcription by RNA polymerase II	296	934	0.316916	1	8.44223e-24	1	0	MIER2_HUMAN	PER1_HUMAN	PER2_HUMAN	PER3_HUMAN	PHF12_HUMAN	PDE2A_HUMAN	MINT_HUMAN	TAF9B_HUMAN	RTF1_HUMAN	PEX2_HUMAN	SNW1_HUMAN	SALL1_HUMAN	CRY1_HUMAN	HDAC9_HUMAN	HEXI2_HUMAN	LRRF1_HUMAN	MAGD1_HUMAN	MAGD2_HUMAN	MAGD4_HUMAN	MAGE2_HUMAN	MAGL2_HUMAN	JARD2_HUMAN	MAZ_HUMAN	DLX4_HUMAN	IRF8_HUMAN	DDX20_HUMAN	IKZF5_HUMAN	LDB2_HUMAN	FOSB_HUMAN	HCLS1_HUMAN	HHEX_HUMAN	CELA1_HUMAN	BCL6B_HUMAN	MEIS2_HUMAN	ETV7_HUMAN	MCPH1_HUMAN	NCOR1_HUMAN	NOTC1_HUMAN	EGR1_HUMAN	EOMES_HUMAN
biological_process	GO:0007155	cell adhesion	226	819	0.275946	1	1.66853e-21	1	0	PDZD2_HUMAN	PGCA_HUMAN	PCDG9_HUMAN	PCDGJ_HUMAN	PCDGE_HUMAN	SIGL8_HUMAN	SIGL9_HUMAN	TINAG_HUMAN	PCDG6_HUMAN	TLN2_HUMAN	MAGI1_HUMAN	GRHL2_HUMAN	CDHR5_HUMAN	MMRN1_HUMAN	ITB4_HUMAN	CSPG2_HUMAN	FES_HUMAN	ITAX_HUMAN	ERBIN_HUMAN	APC_HUMAN	AMTN_HUMAN	CDSN_HUMAN	FAT1_HUMAN	FILA2_HUMAN	LAMA1_HUMAN	PCDB5_HUMAN	BCAR1_HUMAN	CD22_HUMAN	CNT3B_HUMAN	CNTP1_HUMAN	EGLN_HUMAN	LAMB1_HUMAN	ITAL_HUMAN	ITAM_HUMAN	AGRB1_HUMAN	APBA1_HUMAN	CTNB1_HUMAN	FINC_HUMAN	CNTN1_HUMAN	CFDP1_HUMAN
biological_process	GO:0030154	cell differentiation	215	815	0.263804	1	4.46368e-40	1	0	PGBM_HUMAN	NPAP1_HUMAN	TAF7L_HUMAN	TAF8_HUMAN	SYT3_HUMAN	SEPT6_HUMAN	SMOC1_HUMAN	SPT16_HUMAN	S31D3_HUMAN	S31A6_HUMAN	S31A7_HUMAN	SLFN5_HUMAN	RMD3_HUMAN	MAK_HUMAN	M3K20_HUMAN	CDHR5_HUMAN	DLX4_HUMAN	HTF4_HUMAN	FES_HUMAN	ECSCR_HUMAN	DAZ1_HUMAN	HHEX_HUMAN	ANGP1_HUMAN	ARG28_HUMAN	DAZ2_HUMAN	ETV7_HUMAN	ARNT_HUMAN	FOXJ3_HUMAN	FOXK1_HUMAN	ETV1_HUMAN	IGS10_HUMAN	DUS6_HUMAN	ELF4_HUMAN	FOG2_HUMAN	CTSR1_HUMAN	DLX1_HUMAN	CENPF_HUMAN	COT2_HUMAN	ELAV3_HUMAN	CDC20_HUMAN
biological_process	GO:0045893	positive regulation of transcription, DNA-templated	197	660	0.298485	1	7.99382e-36	1	0	BRD4_HUMAN	MED17_HUMAN	PAX2_HUMAN	ROAA_HUMAN	RUNX2_HUMAN	TR150_HUMAN	TP53B_HUMAN	TOPRS_HUMAN	RNF6_HUMAN	SP3_HUMAN	SFR1_HUMAN	RN111_HUMAN	SALL1_HUMAN	TAF1L_HUMAN	HIF1A_HUMAN	LRP5_HUMAN	LRP6_HUMAN	MDFIC_HUMAN	M3K12_HUMAN	MAZ_HUMAN	ARNT2_HUMAN	MMS19_HUMAN	KAT6A_HUMAN	BICRA_HUMAN	ACVL1_HUMAN	AIRE_HUMAN	HMGA1_HUMAN	KMT2E_HUMAN	HHEX_HUMAN	ARI1B_HUMAN	ARI1A_HUMAN	MED14_HUMAN	INSR_HUMAN	NOTC1_HUMAN	FOXK1_HUMAN	CK5P2_HUMAN	CLOCK_HUMAN	EGR1_HUMAN	EOMES_HUMAN	NCF1_HUMAN
biological_process	GO:0035556	intracellular signal transduction	190	756	0.251323	1	5.69573e-11	1	0	PLXB1_HUMAN	RASF5_HUMAN	TNS2_HUMAN	ST32A_HUMAN	STK39_HUMAN	TNIK_HUMAN	GNB1L_HUMAN	MAPK5_HUMAN	MAK_HUMAN	KALRN_HUMAN	MARK3_HUMAN	M3K12_HUMAN	MAST1_HUMAN	MAST2_HUMAN	MAPK2_HUMAN	MAST4_HUMAN	M3K3_HUMAN	ARHG4_HUMAN	GRL1A_HUMAN	HCLS1_HUMAN	ARG28_HUMAN	MK06_HUMAN	GMIP_HUMAN	CAYP1_HUMAN	IRAK3_HUMAN	GWL_HUMAN	MCF2L_HUMAN	DGKI_HUMAN	DGKQ_HUMAN	CLNK_HUMAN	CHK1_HUMAN	FMN2_HUMAN	GRIP1_HUMAN	JAK3_HUMAN	GP155_HUMAN	DNMBP_HUMAN	FYV1_HUMAN	DCDC1_HUMAN	KAISO_HUMAN	LAX1_HUMAN
biological_process	GO:0045892	negative regulation of transcription, DNA-templated	179	567	0.315697	1	1.15055e-29	1	0	PER1_HUMAN	PER2_HUMAN	PHF10_HUMAN	PHF12_HUMAN	PHC1_HUMAN	PHC2_HUMAN	PHC3_HUMAN	MINT_HUMAN	PAX2_HUMAN	RUNX2_HUMAN	SNW1_HUMAN	PRAM5_HUMAN	SP3_HUMAN	PRA22_HUMAN	SALL1_HUMAN	CRY1_HUMAN	HDAC9_HUMAN	HEXI2_HUMAN	MDEAS_HUMAN	MAGL2_HUMAN	MDFIC_HUMAN	JARD2_HUMAN	KAT6A_HUMAN	HMGA1_HUMAN	KDM5B_HUMAN	CDN1B_HUMAN	HHEX_HUMAN	BCL7A_HUMAN	DAXX_HUMAN	HDAC6_HUMAN	NCOR1_HUMAN	NOTC1_HUMAN	FOXK1_HUMAN	NKRF_HUMAN	CLOCK_HUMAN	FOG2_HUMAN	LMBL4_HUMAN	NCOR2_HUMAN	MTEF3_HUMAN	KLF10_HUMAN
biological_process	GO:0051301	cell division	144	535	0.269159	1	1.39677e-10	1	0	PK3C3_HUMAN	SMC2_HUMAN	TACC1_HUMAN	SMC1A_HUMAN	SPAG5_HUMAN	FIGN_HUMAN	MAP10_HUMAN	GPSM2_HUMAN	MAP4_HUMAN	ABRX2_HUMAN	APC5_HUMAN	BUB1B_HUMAN	KI13A_HUMAN	AURKA_HUMAN	E41L2_HUMAN	KTNB1_HUMAN	CTIP_HUMAN	ELYS_HUMAN	HELLS_HUMAN	KIF14_HUMAN	GWL_HUMAN	BCAR1_HUMAN	CTDP1_HUMAN	CC14A_HUMAN	CNTRL_HUMAN	CDCA2_HUMAN	CE164_HUMAN	HAUS4_HUMAN	HAUS5_HUMAN	CNDD3_HUMAN	BIRC6_HUMAN	CENPF_HUMAN	CDC27_HUMAN	CDC20_HUMAN	FZR1_HUMAN	DCDC1_HUMAN	EVI5_HUMAN	FA83D_HUMAN	NSUN2_HUMAN	BUB1_HUMAN
biological_process	GO:0007283	spermatogenesis	138	486	0.283951	1	3.075e-08	1	0	VCX1_HUMAN	NPAP1_HUMAN	RBY1B_HUMAN	TAF7L_HUMAN	SEPT6_HUMAN	SPT16_HUMAN	SHSA6_HUMAN	S31D3_HUMAN	S31A6_HUMAN	S31A7_HUMAN	SPC1L_HUMAN	PKHA1_HUMAN	STP2_HUMAN	MAK_HUMAN	BRME1_HUMAN	KLC3_HUMAN	MPRI_HUMAN	HOATZ_HUMAN	DAZ1_HUMAN	DAZ2_HUMAN	GOGA3_HUMAN	ATS2_HUMAN	FOXJ3_HUMAN	KASH5_HUMAN	HERC2_HUMAN	NOTC1_HUMAN	CDY2_HUMAN	CLOCK_HUMAN	CC136_HUMAN	DRC7_HUMAN	CTSR1_HUMAN	E2F1_HUMAN	APOB_HUMAN	K1C9_HUMAN	DHX36_HUMAN	MPIP3_HUMAN	ING2_HUMAN	PMFBP_HUMAN	BRCA2_HUMAN	BRDT_HUMAN
biological_process	GO:0006325	chromatin organization	125	457	0.273523	1	3.29867e-13	1	0	SET1A_HUMAN	VCX1_HUMAN	SET1B_HUMAN	SETD5_HUMAN	RSBN1_HUMAN	TRRAP_HUMAN	HDAC9_HUMAN	LRWD1_HUMAN	JHD2C_HUMAN	KDM3B_HUMAN	KMT2E_HUMAN	CHD9_HUMAN	NCOR1_HUMAN	LMBL4_HUMAN	ING3_HUMAN	AEBP2_HUMAN	APBB1_HUMAN	EP400_HUMAN	BRD8_HUMAN	EYA1_HUMAN	KMT2C_HUMAN	COPRS_HUMAN	BRE1A_HUMAN	ING2_HUMAN	KMT2A_HUMAN	KAT7_HUMAN	KDM2B_HUMAN	MEN1_HUMAN	PRDM6_HUMAN	SOX2_HUMAN	TOX_HUMAN	SATB1_HUMAN	UBP16_HUMAN	NSD1_HUMAN	NSD3_HUMAN	TET1_HUMAN	PWP3A_HUMAN	UIMC1_HUMAN	Z518B_HUMAN	TET2_HUMAN
biological_process	GO:0007049	cell cycle	124	462	0.268398	1	5.94416e-21	1	0	PK3C3_HUMAN	RO52_HUMAN	SGSM3_HUMAN	FIGN_HUMAN	M3K20_HUMAN	APC5_HUMAN	KI13A_HUMAN	E41L2_HUMAN	FANCI_HUMAN	ELYS_HUMAN	KMT2E_HUMAN	MK06_HUMAN	DDIAS_HUMAN	HELLS_HUMAN	MTBP_HUMAN	C8AP2_HUMAN	CC14A_HUMAN	CNTRL_HUMAN	CDCA2_HUMAN	CE164_HUMAN	HACE1_HUMAN	BIRC6_HUMAN	CTF18_HUMAN	K1C18_HUMAN	DCDC1_HUMAN	EVI5_HUMAN	GAK_HUMAN	LIN54_HUMAN	KAT2B_HUMAN	EP300_HUMAN	FL2D_HUMAN	MICA3_HUMAN	PIMRE_HUMAN	BORA_HUMAN	CP131_HUMAN	CAF1B_HUMAN	CD123_HUMAN	SIK1_HUMAN	RIF1_HUMAN	SPI2A_HUMAN
biological_process	GO:0007018	microtubule-based movement	113	250	0.452	1	1.17986e-20	1	0	DC1I2_HUMAN	KI20A_HUMAN	KIF19_HUMAN	KIF5C_HUMAN	KIFC3_HUMAN	KI13A_HUMAN	KIF4B_HUMAN	KIF15_HUMAN	KIF5A_HUMAN	KINH_HUMAN	DYH1_HUMAN	DYH3_HUMAN	KI21A_HUMAN	KI21B_HUMAN	KIF14_HUMAN	KIF6_HUMAN	DC2I2_HUMAN	KIF27_HUMAN	DYH7_HUMAN	DNAI4_HUMAN	DYHC2_HUMAN	DC1I1_HUMAN	KIF22_HUMAN	KIFC2_HUMAN	KIF23_HUMAN	DYH14_HUMAN	DYH6_HUMAN	DNAI1_HUMAN	KTN1_HUMAN	STAR9_HUMAN	DYH9_HUMAN	DYH2_HUMAN	KI20B_HUMAN	KIFC1_HUMAN	KIF24_HUMAN	KIF28_HUMAN	KIF2A_HUMAN	KIF2C_HUMAN	KIF11_HUMAN	DNHD1_HUMAN
biological_process	GO:0060271	cilium assembly	108	345	0.313043	1	6.12547e-13	1	0	PCM1_HUMAN	PCNT_HUMAN	PLK4_HUMAN	STK36_HUMAN	RO60_HUMAN	SEPT6_HUMAN	TTBK2_HUMAN	MAK_HUMAN	IQUB_HUMAN	HOATZ_HUMAN	C2CD3_HUMAN	HYLS1_HUMAN	CE126_HUMAN	IQCB1_HUMAN	MKS3_HUMAN	CEP70_HUMAN	HDAC6_HUMAN	FBF1_HUMAN	NOTC1_HUMAN	BBS4_HUMAN	CC14A_HUMAN	CCD66_HUMAN	CE164_HUMAN	CE162_HUMAN	DC2I2_HUMAN	KIF27_HUMAN	CFA43_HUMAN	GBF1_HUMAN	DYHC2_HUMAN	INTU_HUMAN	AVIL_HUMAN	LAMA5_HUMAN	CCD96_HUMAN	CP131_HUMAN	PIBF1_HUMAN	CFA70_HUMAN	CE290_HUMAN	PKHD1_HUMAN	MKKS_HUMAN	TM237_HUMAN
biological_process	GO:0030036	actin cytoskeleton organization	98	313	0.313099	1	2.79299e-17	1	0	PDLI5_HUMAN	PK3CA_HUMAN	UTRN_HUMAN	POF1B_HUMAN	ROCK2_HUMAN	KLHL1_HUMAN	KANK1_HUMAN	LIMK1_HUMAN	DIAP3_HUMAN	FGD6_HUMAN	AMOL1_HUMAN	ARHGI_HUMAN	BIG3_HUMAN	INF2_HUMAN	GA2L3_HUMAN	EHBP1_HUMAN	MTSS1_HUMAN	MRTFA_HUMAN	PI51C_HUMAN	BCR_HUMAN	FGD5_HUMAN	EH1L1_HUMAN	LIMK2_HUMAN	IQEC2_HUMAN	NF1_HUMAN	NPHP4_HUMAN	RHOU_HUMAN	SMTL1_HUMAN	SMTL2_HUMAN	SPTN1_HUMAN	SPTN2_HUMAN	SPTN4_HUMAN	SPTN5_HUMAN	SPTB1_HUMAN	SSH2_HUMAN	SRF_HUMAN	RND3_HUMAN	SHRM4_HUMAN	SPTB2_HUMAN	ROCK1_HUMAN
biological_process	GO:0007399	nervous system development	97	484	0.200413	1	1.54174e-23	1	0	PHF10_HUMAN	NEXMI_HUMAN	SMRD1_HUMAN	GRDN_HUMAN	LGI1_HUMAN	KALRN_HUMAN	MBD5_HUMAN	HTF4_HUMAN	APCL_HUMAN	LDB2_HUMAN	LIMK1_HUMAN	ARI1B_HUMAN	ARI1A_HUMAN	APC_HUMAN	APBA2_HUMAN	APBA1_HUMAN	FINC_HUMAN	EVL_HUMAN	ELAV3_HUMAN	APOB_HUMAN	ANAG_HUMAN	CDC20_HUMAN	BIRC1_HUMAN	MEF2C_HUMAN	INTU_HUMAN	KCNQ2_HUMAN	AVIL_HUMAN	EP300_HUMAN	CDON_HUMAN	LDB1_HUMAN	SIM1_HUMAN	RFOX1_HUMAN	NRG1_HUMAN	SETX_HUMAN	RBM45_HUMAN	RFOX2_HUMAN	SMCA2_HUMAN	SRRM4_HUMAN	SSPO_HUMAN	TFE2_HUMAN
biological_process	GO:0006974	cellular response to DNA damage stimulus	85	285	0.298246	1	2.1506e-08	1	0	BRD4_HUMAN	SET1A_HUMAN	MRE11_HUMAN	TRAIP_HUMAN	TP53B_HUMAN	TOPRS_HUMAN	SOSB1_HUMAN	BRAT1_HUMAN	MAPK2_HUMAN	ETAA1_HUMAN	MMS19_HUMAN	BAZ1B_HUMAN	APLF_HUMAN	APC_HUMAN	FUMH_HUMAN	BCL2_HUMAN	HELB_HUMAN	GWL_HUMAN	HERC2_HUMAN	CHK1_HUMAN	FMN2_HUMAN	APBB1_HUMAN	ATMIN_HUMAN	BRCA1_HUMAN	ATR_HUMAN	CARF_HUMAN	HMCES_HUMAN	NIPBL_HUMAN	NCOA6_HUMAN	MCM10_HUMAN	P53_HUMAN	CHK2_HUMAN	MNDA_HUMAN	MORC2_HUMAN	NPAS2_HUMAN	PR15A_HUMAN	CHD1L_HUMAN	MEN1_HUMAN	RIF1_HUMAN	SETX_HUMAN
biological_process	GO:0051726	regulation of cell cycle	85	327	0.259939	1	4.29701e-14	1	0	PER2_HUMAN	PRR11_HUMAN	TRRAP_HUMAN	JADE3_HUMAN	CDN1B_HUMAN	FBXL6_HUMAN	GWL_HUMAN	NU214_HUMAN	BOP1_HUMAN	MADD_HUMAN	ING3_HUMAN	BRCA1_HUMAN	EP400_HUMAN	EPC1_HUMAN	FAKD4_HUMAN	FOXM1_HUMAN	BRD8_HUMAN	PML_HUMAN	KAT2B_HUMAN	INO80_HUMAN	KAT7_HUMAN	NFRKB_HUMAN	BCR_HUMAN	FIGL1_HUMAN	P53_HUMAN	PKD1_HUMAN	SON_HUMAN	PR15A_HUMAN	CD123_HUMAN	MX2_HUMAN	SIR2_HUMAN	SKIL_HUMAN	SPI2A_HUMAN	MDM2_HUMAN	PKD2_HUMAN	PNPT1_HUMAN	TADBP_HUMAN	UBP16_HUMAN	SPI2B_HUMAN	PUM1_HUMAN
biological_process	GO:0006338	chromatin remodeling	82	250	0.328	1	3.28314e-08	1	0	BRD4_HUMAN	TAF6L_HUMAN	SMRD1_HUMAN	JARD2_HUMAN	BAZ1B_HUMAN	BAZ2B_HUMAN	KDM5B_HUMAN	KDM6B_HUMAN	KDM4D_HUMAN	ARI1B_HUMAN	ARI1A_HUMAN	KDM4B_HUMAN	DAXX_HUMAN	CHD4_HUMAN	CECR2_HUMAN	MIER1_HUMAN	BAZ2A_HUMAN	KDM4E_HUMAN	BPTF_HUMAN	EZH1_HUMAN	CHD7_HUMAN	KAT2B_HUMAN	INO80_HUMAN	NFRKB_HUMAN	P66A_HUMAN	BRDT_HUMAN	CHD8_HUMAN	MORC2_HUMAN	CHD1L_HUMAN	SMRD3_HUMAN	SATB2_HUMAN	SMCA2_HUMAN	SATB1_HUMAN	RERE_HUMAN	P63_HUMAN	KDM6A_HUMAN	ARP8_HUMAN	HCFC2_HUMAN	MYB_HUMAN	MYSM1_HUMAN
biological_process	GO:0051056	regulation of small GTPase mediated signal transduction	80	191	0.418848	1	3.59786e-20	1	0	SI1L1_HUMAN	TAGAP_HUMAN	RHGBA_HUMAN	TIAM2_HUMAN	RHG30_HUMAN	SRGP2_HUMAN	KALRN_HUMAN	ARHG4_HUMAN	ARG28_HUMAN	GMIP_HUMAN	MCF2L_HUMAN	DNMBP_HUMAN	PKHG5_HUMAN	OBSCN_HUMAN	BCR_HUMAN	FGD5_HUMAN	PKHG3_HUMAN	RLGPB_HUMAN	ARHGP_HUMAN	PKH4B_HUMAN	PKHG1_HUMAN	RGRF2_HUMAN	RHG44_HUMAN	RHOU_HUMAN	RHG23_HUMAN	RHG39_HUMAN	RHG32_HUMAN	RGPA2_HUMAN	RHG19_HUMAN	RHG20_HUMAN	RHG31_HUMAN	TRIO_HUMAN	PKHG4_HUMAN	VAV_HUMAN	RHG27_HUMAN	RHG28_HUMAN	RHG04_HUMAN	RHG06_HUMAN	RHG18_HUMAN	RHG40_HUMAN
biological_process	GO:0016477	cell migration	79	316	0.25	1	9.46325e-09	1	0	LAMA3_HUMAN	PEAK1_HUMAN	PLXB1_HUMAN	PK3CA_HUMAN	SH3K1_HUMAN	SH321_HUMAN	GRDN_HUMAN	BRAT1_HUMAN	APCL_HUMAN	ITB4_HUMAN	LAMB4_HUMAN	APC_HUMAN	FAT1_HUMAN	LAMC3_HUMAN	BCAR1_HUMAN	CD248_HUMAN	EGLN_HUMAN	LAMB1_HUMAN	CTNA2_HUMAN	CARL1_HUMAN	FA83D_HUMAN	ITB3_HUMAN	P3C2A_HUMAN	LAMA5_HUMAN	BTG1_HUMAN	LAMB3_HUMAN	MRCKB_HUMAN	RHOU_HUMAN	PK3CG_HUMAN	PODXL_HUMAN	SYNC_HUMAN	MRCKA_HUMAN	PLAK_HUMAN	USH2A_HUMAN	RHDF1_HUMAN	SDC1_HUMAN	USP9X_HUMAN	PARP9_HUMAN	RND3_HUMAN	TGFB2_HUMAN
biological_process	GO:0007420	brain development	77	259	0.297297	1	9.50966e-11	1	0	PGBM_HUMAN	PLXB2_HUMAN	SET1A_HUMAN	STK36_HUMAN	VCX1_HUMAN	VCX2_HUMAN	VCX3B_HUMAN	VCX3_HUMAN	VCY1_HUMAN	PBX1_HUMAN	SYNJ1_HUMAN	ROBO2_HUMAN	MDGA1_HUMAN	DDIT4_HUMAN	GRHL2_HUMAN	HAP1_HUMAN	MAST1_HUMAN	ARNT2_HUMAN	C2CD3_HUMAN	MEIS2_HUMAN	NFASC_HUMAN	CK5P2_HUMAN	DJC30_HUMAN	EOMES_HUMAN	CTTB2_HUMAN	BPTF_HUMAN	AFF2_HUMAN	CFA43_HUMAN	CNTN1_HUMAN	CNTN5_HUMAN	MED1_HUMAN	DLX2_HUMAN	JHY_HUMAN	BRCA2_HUMAN	EGR2_HUMAN	BCR_HUMAN	NIPBL_HUMAN	NCOA6_HUMAN	NEST_HUMAN	PITM1_HUMAN
biological_process	GO:0007264	small GTPase mediated signal transduction	74	324	0.228395	1	1.99754e-10	1	0	TIAM2_HUMAN	RHG30_HUMAN	GRDN_HUMAN	DAPLE_HUMAN	NUCB1_HUMAN	GNDS_HUMAN	ARHGI_HUMAN	MIRO1_HUMAN	GRP3_HUMAN	BCR_HUMAN	RGRF2_HUMAN	RHG32_HUMAN	RHG33_HUMAN	RHG31_HUMAN	VAV_HUMAN	RIN2_HUMAN	RND3_HUMAN	RPGF4_HUMAN	RHG18_HUMAN	USO1_HUMAN	RGRF1_HUMAN	RAE2_HUMAN	RGF1A_HUMAN	DOC10_HUMAN	DOC11_HUMAN	DOCK1_HUMAN	DOCK2_HUMAN	DOCK4_HUMAN	DOCK8_HUMAN	DOCK9_HUMAN	ARFP2_HUMAN	DAB1_HUMAN	DNJA3_HUMAN	ABR_HUMAN	A0A087WZG4_HUMAN	A0A2R8YD85_HUMAN	E9PKT1_HUMAN	H7BXZ6_HUMAN	Q53RZ3_HUMAN	H0Y7H7_HUMAN
biological_process	GO:0098609	cell-cell adhesion	73	212	0.34434	1	1.05568e-08	1	0	LAMA3_HUMAN	PECA1_HUMAN	PK1L1_HUMAN	ROBO2_HUMAN	TLN1_HUMAN	TLN2_HUMAN	FAT2_HUMAN	LRP6_HUMAN	LRRC7_HUMAN	CADH7_HUMAN	KIRR3_HUMAN	FAT3_HUMAN	DCC_HUMAN	CDSN_HUMAN	FAT1_HUMAN	BCL2_HUMAN	IGSF5_HUMAN	NFASC_HUMAN	CDHR2_HUMAN	ITAL_HUMAN	CTNB1_HUMAN	FND3A_HUMAN	CTNA2_HUMAN	CNTN1_HUMAN	CNTN5_HUMAN	KIRR1_HUMAN	NPHN_HUMAN	PI51C_HUMAN	OBSCN_HUMAN	DSC3_HUMAN	LAMA5_HUMAN	CYFP2_HUMAN	CDON_HUMAN	NECT1_HUMAN	NPHP4_HUMAN	PKHD1_HUMAN	PLAK_HUMAN	TENX_HUMAN	PKP2_HUMAN	TTYH1_HUMAN
biological_process	GO:0010468	regulation of gene expression	71	266	0.266917	1	2.90896e-78	1	0	UROL1_HUMAN	RO52_HUMAN	RO60_HUMAN	TRI48_HUMAN	TRIM4_HUMAN	ROAA_HUMAN	TR49D_HUMAN	SART3_HUMAN	HIF1A_HUMAN	MARF1_HUMAN	KDM6B_HUMAN	DAXX_HUMAN	BCL2_HUMAN	AFF2_HUMAN	APBA1_HUMAN	FUBP2_HUMAN	FUBP3_HUMAN	DUX4C_HUMAN	MEGF8_HUMAN	PRDM1_HUMAN	NF1_HUMAN	PRD10_HUMAN	NPAT_HUMAN	STOX1_HUMAN	PRDM6_HUMAN	SOX2_HUMAN	PRDM2_HUMAN	STX1B_HUMAN	TADBP_HUMAN	PO5F1_HUMAN	ZF64B_HUMAN	PRDM9_HUMAN	PIN1_HUMAN	ZN335_HUMAN	PTPRC_HUMAN	UBAP2_HUMAN	TRI14_HUMAN	ZN507_HUMAN	ZN683_HUMAN	TR64C_HUMAN
biological_process	GO:0007507	heart development	64	218	0.293578	1	2.37676e-10	1	0	PDLI5_HUMAN	TAB2_HUMAN	SENP2_HUMAN	SALL1_HUMAN	HDAC9_HUMAN	ACVL1_HUMAN	CDN1B_HUMAN	HEG1_HUMAN	KDM6B_HUMAN	AP1B1_HUMAN	KCNQ1_HUMAN	NOTC1_HUMAN	CAC1C_HUMAN	C1TC_HUMAN	FOG2_HUMAN	ITA3_HUMAN	FINC_HUMAN	BROMI_HUMAN	FREM2_HUMAN	MEF2C_HUMAN	KAT2B_HUMAN	EP300_HUMAN	NCOA6_HUMAN	MICA2_HUMAN	PKD1_HUMAN	DNAI1_HUMAN	NF1_HUMAN	MKKS_HUMAN	PO6F1_HUMAN	PRKDC_HUMAN	PKD2_HUMAN	SRF_HUMAN	WT1_HUMAN	TGFB2_HUMAN	TCF25_HUMAN	PKP2_HUMAN	NTRK3_HUMAN	TBX5_HUMAN	TSC2_HUMAN	BCOR_HUMAN
biological_process	GO:0007030	Golgi organization	63	136	0.463235	1	7.64376e-13	1	0	TMED3_HUMAN	TMED6_HUMAN	STX17_HUMAN	LMAN1_HUMAN	KIFC3_HUMAN	ATLA3_HUMAN	GOG8C_HUMAN	GOG8J_HUMAN	GOG8K_HUMAN	GOG8M_HUMAN	GOG6C_HUMAN	COG2_HUMAN	DJC28_HUMAN	HACE1_HUMAN	ATLA2_HUMAN	GOG6B_HUMAN	GBF1_HUMAN	GOG8T_HUMAN	GOGA5_HUMAN	DYHC2_HUMAN	GAK_HUMAN	BIG1_HUMAN	HIKES_HUMAN	GOG8B_HUMAN	LYSM3_HUMAN	CTRO_HUMAN	GOG6D_HUMAN	GOG8R_HUMAN	P4K2A_HUMAN	P4K2B_HUMAN	COG7_HUMAN	NPL4_HUMAN	SPTN5_HUMAN	PKHM2_HUMAN	S23IP_HUMAN	SC16B_HUMAN	TPC11_HUMAN	SC16A_HUMAN	US6NL_HUMAN	TPPC8_HUMAN
biological_process	GO:0007015	actin filament organization	53	186	0.284946	1	5.78466e-09	1	0	POF1B_HUMAN	SHRM1_HUMAN	SH3K1_HUMAN	SH321_HUMAN	MPRIP_HUMAN	LMOD2_HUMAN	HIP1R_HUMAN	FAT1_HUMAN	BCL2_HUMAN	KASH5_HUMAN	BCAR1_HUMAN	NEB1_HUMAN	EVL_HUMAN	CARL1_HUMAN	PRGC2_HUMAN	CGNL1_HUMAN	AVIL_HUMAN	RHG25_HUMAN	SHIP2_HUMAN	RHG17_HUMAN	SHRM3_HUMAN	TARA_HUMAN	RND3_HUMAN	SHRM4_HUMAN	SAM14_HUMAN	XIRP2_HUMAN	VINEX_HUMAN	RHG12_HUMAN	XIRP1_HUMAN	CORO7_HUMAN	HIP1_HUMAN	MYO1E_HUMAN	MYO5A_HUMAN	MYO5B_HUMAN	MYO5C_HUMAN	MYO6_HUMAN	MYO7A_HUMAN	KHDC3_HUMAN	MYO15_HUMAN	MYO19_HUMAN
biological_process	GO:0007010	cytoskeleton organization	45	154	0.292208	1	1.65819e-41	1	0	PCLO_HUMAN	SH3K1_HUMAN	TNIK_HUMAN	MAST1_HUMAN	MAST2_HUMAN	M3K20_HUMAN	MAST4_HUMAN	BRWD3_HUMAN	CAMP1_HUMAN	K1C16_HUMAN	CAP2_HUMAN	CECR2_HUMAN	DIAP3_HUMAN	CNTP1_HUMAN	BIN1_HUMAN	FGD6_HUMAN	BRWD1_HUMAN	MICA3_HUMAN	FGD5_HUMAN	MICA2_HUMAN	MRCKB_HUMAN	ANK1_HUMAN	RHOU_HUMAN	PADI6_HUMAN	SH319_HUMAN	RHG04_HUMAN	WASF3_HUMAN	ZN135_HUMAN	TNAP3_HUMAN	ZMYM3_HUMAN	ZMYM4_HUMAN	ZMYM6_HUMAN	ZRAN1_HUMAN	RANB9_HUMAN	ABI2_HUMAN	ARAP3_HUMAN	DYST_HUMAN	CNN2_HUMAN	E9PDI2_HUMAN	A0A087X0J3_HUMAN
biological_process	GO:0045104	intermediate filament cytoskeleton organization	43	66	0.651515	1	2.52503e-13	1	0	SYNEM_HUMAN	K2C3_HUMAN	EPIPL_HUMAN	ERBIN_HUMAN	K1C16_HUMAN	MACF1_HUMAN	K1C18_HUMAN	EVPLL_HUMAN	EVPL_HUMAN	RAF1_HUMAN	DESP_HUMAN	DYST_HUMAN	H0Y6T5_HUMAN	E9PLY5_HUMAN	A0A669KB06_HUMAN	H0Y390_HUMAN	A0A0U1RQJ2_HUMAN	H0Y314_HUMAN	A0A494C1U5_HUMAN	H0YL34_HUMAN	K7EKI0_HUMAN	A0A669KBB0_HUMAN	A0A590UJG2_HUMAN	A0A075B730_HUMAN	A0A7P0MQR8_HUMAN	E9PNZ4_HUMAN	H3BPE1_HUMAN	A0A5F9ZGX0_HUMAN	A0A075B7B1_HUMAN	H0YC65_HUMAN	H0YC82_HUMAN	A0A494C073_HUMAN	E9PHM6_HUMAN	E9PLY0_HUMAN	H0Y4F5_HUMAN	Q6P0N6_HUMAN	F6QMI7_HUMAN	A0A494C1D7_HUMAN	H0Y7I1_HUMAN	H3BQK9_HUMAN
biological_process	GO:0006366	transcription by RNA polymerase II	43	171	0.251462	1	2.3517e-79	1	0	TAF6_HUMAN	DDX21_HUMAN	FOSB_HUMAN	ETV7_HUMAN	NF2L3_HUMAN	HIF3A_HUMAN	NFAT5_HUMAN	ETV1_HUMAN	ERCC6_HUMAN	GMEB2_HUMAN	PKNX1_HUMAN	LDB1_HUMAN	RPAP1_HUMAN	SFR19_HUMAN	T22D1_HUMAN	TCFL5_HUMAN	TAF5L_HUMAN	TAF4_HUMAN	TIF1A_HUMAN	PHRF1_HUMAN	TAF1C_HUMAN	XBP1_HUMAN	TRIPB_HUMAN	ZN768_HUMAN	TAF1_HUMAN	TF2H4_HUMAN	TBP_HUMAN	TF2H1_HUMAN	CCNK_HUMAN	CCNT1_HUMAN	F170A_HUMAN	NFYA_HUMAN	GLIS3_HUMAN	DTX1_HUMAN	ERCC3_HUMAN	J3QKS5_HUMAN	A0A2R8Y739_HUMAN	F8WEH6_HUMAN	C9J4P4_HUMAN	B5MCT2_HUMAN
biological_process	GO:0007417	central nervous system development	43	152	0.282895	1	1.37228e-10	1	0	PGCA_HUMAN	SSDH_HUMAN	ROBO2_HUMAN	SH3G2_HUMAN	JARD2_HUMAN	KALRN_HUMAN	ARNT2_HUMAN	MNX1_HUMAN	CSPG2_HUMAN	GSX1_HUMAN	CHD7_HUMAN	GTR1_HUMAN	PAX6_HUMAN	NEST_HUMAN	PO6F2_HUMAN	NPAS2_HUMAN	PTPRZ_HUMAN	STK4_HUMAN	TRIO_HUMAN	TNR16_HUMAN	SCIN_HUMAN	SZT2_HUMAN	EMX2_HUMAN	WWP1_HUMAN	RELN_HUMAN	NCAN_HUMAN	NEUS_HUMAN	ADA22_HUMAN	CELR1_HUMAN	NPTX1_HUMAN	MBP_HUMAN	DRP2_HUMAN	ATN1_HUMAN	DSCL1_HUMAN	AHI1_HUMAN	C9IZQ6_HUMAN	E7EPJ7_HUMAN	E7EWP2_HUMAN	F5H228_HUMAN	A0A7P0TA83_HUMAN
biological_process	GO:0000226	microtubule cytoskeleton organization	43	171	0.251462	1	4.60654e-18	1	0	PCNT_HUMAN	TACC1_HUMAN	TACC2_HUMAN	TTBK2_HUMAN	MAP1B_HUMAN	MARK3_HUMAN	MAP4_HUMAN	MAP6_HUMAN	CAMP1_HUMAN	APCL_HUMAN	BBS4_HUMAN	CC14A_HUMAN	CC170_HUMAN	CK5P2_HUMAN	GA2L3_HUMAN	SON_HUMAN	TACC3_HUMAN	SIK3_HUMAN	SSXT_HUMAN	TGRM1_HUMAN	PRC1_HUMAN	TBCD_HUMAN	ULK4_HUMAN	PARD3_HUMAN	TTLL5_HUMAN	TGRM2_HUMAN	KIF2A_HUMAN	DYST_HUMAN	CLAP1_HUMAN	CLAP2_HUMAN	ATX7_HUMAN	CAMP2_HUMAN	B5MEG9_HUMAN	A0A669KB95_HUMAN	F8WCI3_HUMAN	F8WF55_HUMAN	A0A0A0MRG9_HUMAN	G3V1N3_HUMAN	A0A669KAU7_HUMAN	H0YIT6_HUMAN
biological_process	GO:0000724	double-strand break repair via homologous recombination	40	121	0.330579	1	6.04628e-13	1	0	MRE11_HUMAN	SOSB1_HUMAN	SLX4_HUMAN	SFR1_HUMAN	MMS22_HUMAN	KDM4D_HUMAN	CTIP_HUMAN	KASH5_HUMAN	BRCA1_HUMAN	ERCC5_HUMAN	INO80_HUMAN	BRCA2_HUMAN	RMI1_HUMAN	PALB2_HUMAN	RECQ4_HUMAN	WRN_HUMAN	MCM9_HUMAN	RECQ5_HUMAN	XRCC2_HUMAN	REV3L_HUMAN	ZFY26_HUMAN	RFWD3_HUMAN	TONSL_HUMAN	RAD52_HUMAN	R51A2_HUMAN	RA54B_HUMAN	RFA2_HUMAN	AUNIP_HUMAN	NBN_HUMAN	DPOLL_HUMAN	ATM_HUMAN	G3V2D8_HUMAN	A0A7P0TAP7_HUMAN	J3QSH7_HUMAN	A0A7I2YQV0_HUMAN	I6L8A6_HUMAN	A0A7I2V403_HUMAN	A0A7P0T9D7_HUMAN	E2QRD4_HUMAN	A0A7I2YQU3_HUMAN
biological_process	GO:0032467	positive regulation of cytokinesis	39	91	0.428571	1	3.48281e-08	1	0	SVIL_HUMAN	MAP10_HUMAN	KIF14_HUMAN	CC14A_HUMAN	KIF23_HUMAN	CTRO_HUMAN	PKP4_HUMAN	CDC6_HUMAN	KI20B_HUMAN	CSPP1_HUMAN	A0A7I2V5W3_HUMAN	A0A7I2YQH9_HUMAN	A0A7I2V5N5_HUMAN	A0A7I2V3V5_HUMAN	A0A7I2V4R5_HUMAN	A0A0D9SF60_HUMAN	A0A7I2V3M9_HUMAN	A0A7I2V5L8_HUMAN	A0A7I2V3F6_HUMAN	A0A7I2V3Z9_HUMAN	A0A7I2V450_HUMAN	A0A7I2V3Q0_HUMAN	A0A6Q8PHN8_HUMAN	A0A7I2PHE7_HUMAN	A0A7I2V372_HUMAN	A0A6Q8PF61_HUMAN	A0A7I2V2I3_HUMAN	A0A6Q8PGS3_HUMAN	F2Z2M5_HUMAN	A0A7I2V425_HUMAN	A0A7I2V5J9_HUMAN	A0A7I2V5Y8_HUMAN	A0A7I2V3F0_HUMAN	A0A7I2V5J7_HUMAN	A0A7I2V5A7_HUMAN	A0A7I2V398_HUMAN	A0A6Q8PF96_HUMAN	A0A7I2V5G7_HUMAN	A0A7I2V4L2_HUMAN
biological_process	GO:0060333	interferon-gamma-mediated signaling pathway	37	73	0.506849	1	1.92946e-10	1	0	P53_HUMAN	SP100_HUMAN	IFNG_HUMAN	Q5SUL5_HUMAN	H3BT31_HUMAN	A0A0G2JL56_HUMAN	O78179_HUMAN	A0A0G2JPD3_HUMAN	Q5RIP0_HUMAN	Q5QT33_HUMAN	D9J307_HUMAN	A0A1W2PRX1_HUMAN	Q2L6G2_HUMAN	D5H3J5_HUMAN	Q5SRN5_HUMAN	A0A1W2PS24_HUMAN	A0A140T913_HUMAN	A0A1W2PNZ7_HUMAN	Q5RJ27_HUMAN	Q5SPM2_HUMAN	A0A140T8Y4_HUMAN	A0A0G2JIF2_HUMAN	A0A1W2PP77_HUMAN	S6AU73_HUMAN	Q9GJ45_HUMAN	A0A140T9X5_HUMAN	Q53YP1_HUMAN	Q53Z42_HUMAN	A0A1W2PSE7_HUMAN	O19617_HUMAN	A0A1W2PQS8_HUMAN	A0A1W2PR61_HUMAN	A0A1W2PRT9_HUMAN	B0UXQ0_HUMAN	A0A140T9I0_HUMAN	A0A1W2PS56_HUMAN	Q5SS57_HUMAN
biological_process	GO:0007052	mitotic spindle organization	36	87	0.413793	1	3.2931e-12	1	0	PCNT_HUMAN	TACC1_HUMAN	TACC2_HUMAN	GPSM2_HUMAN	MAP4_HUMAN	KIF4B_HUMAN	AURKA_HUMAN	CE126_HUMAN	KIF4A_HUMAN	DLGP5_HUMAN	TACC3_HUMAN	STIL_HUMAN	WDR62_HUMAN	SUN2_HUMAN	KIF2A_HUMAN	KIF11_HUMAN	CENPE_HUMAN	CLAP1_HUMAN	CLAP2_HUMAN	DCTN2_HUMAN	DYHC1_HUMAN	H0Y9Y7_HUMAN	E7ET87_HUMAN	C9JA91_HUMAN	A0A0C4DGD5_HUMAN	A0A494BZT8_HUMAN	E5RFM9_HUMAN	E5RJG6_HUMAN	A0A087WUE2_HUMAN	E7EMZ9_HUMAN	H0Y954_HUMAN	E7EVI4_HUMAN	A0A0C4DGD3_HUMAN	E7EMT0_HUMAN	E9PBC6_HUMAN	R4GMT7_HUMAN
biological_process	GO:0000278	mitotic cell cycle	35	137	0.255474	1	6.8872e-11	1	0	PLK4_HUMAN	HGF_HUMAN	ABRX2_HUMAN	KIF15_HUMAN	AURKA_HUMAN	GWL_HUMAN	MCPH1_HUMAN	NU214_HUMAN	CENPF_HUMAN	KIF22_HUMAN	CTRO_HUMAN	MEN1_HUMAN	SMC3_HUMAN	WAPL_HUMAN	RECQ5_HUMAN	UBP16_HUMAN	TBCD_HUMAN	XRCC2_HUMAN	TTYH1_HUMAN	WDHD1_HUMAN	CDC6_HUMAN	MYB_HUMAN	MYPT1_HUMAN	NEK3_HUMAN	NEK4_HUMAN	KIF11_HUMAN	DPOE1_HUMAN	CENPE_HUMAN	CENPT_HUMAN	CP250_HUMAN	GCP4_HUMAN	GCP6_HUMAN	ABL1_HUMAN	DYHC1_HUMAN	CLIP1_HUMAN
biological_process	GO:0006302	double-strand break repair	34	104	0.326923	1	1.48815e-15	1	0	MRE11_HUMAN	MARF1_HUMAN	APLF_HUMAN	MEIOC_HUMAN	BRCA1_HUMAN	EYA1_HUMAN	DDX1_HUMAN	INO80_HUMAN	BRCA2_HUMAN	P53_HUMAN	CHK2_HUMAN	SMHD1_HUMAN	SETX_HUMAN	PARP3_HUMAN	PRKDC_HUMAN	RNF8_HUMAN	WRN_HUMAN	PARP9_HUMAN	TB182_HUMAN	UIMC1_HUMAN	RAD50_HUMAN	RAD52_HUMAN	ARP8_HUMAN	NBN_HUMAN	DPOLQ_HUMAN	DTX3L_HUMAN	APTX_HUMAN	ATM_HUMAN	EYA3_HUMAN	E9PRH6_HUMAN	F8W7U8_HUMAN	J3KTL8_HUMAN	F8WET0_HUMAN	A0A0C4DG07_HUMAN
biological_process	GO:0002480	antigen processing and presentation of exogenous peptide antigen via MHC class I, TAP-independent	33	48	0.6875	1	2.86754e-14	1	0	Q5SUL5_HUMAN	A0A0G2JL56_HUMAN	O78179_HUMAN	A0A0G2JPD3_HUMAN	Q5RIP0_HUMAN	Q5QT33_HUMAN	D9J307_HUMAN	A0A1W2PRX1_HUMAN	Q2L6G2_HUMAN	D5H3J5_HUMAN	Q5SRN5_HUMAN	A0A1W2PS24_HUMAN	A0A140T913_HUMAN	A0A1W2PNZ7_HUMAN	Q5RJ27_HUMAN	Q5SPM2_HUMAN	A0A140T8Y4_HUMAN	A0A0G2JIF2_HUMAN	A0A1W2PP77_HUMAN	S6AU73_HUMAN	Q9GJ45_HUMAN	A0A140T9X5_HUMAN	Q53YP1_HUMAN	Q53Z42_HUMAN	A0A1W2PSE7_HUMAN	O19617_HUMAN	A0A1W2PQS8_HUMAN	A0A1W2PR61_HUMAN	A0A1W2PRT9_HUMAN	B0UXQ0_HUMAN	A0A140T9I0_HUMAN	A0A1W2PS56_HUMAN	Q5SS57_HUMAN
biological_process	GO:0031175	neuron projection development	32	128	0.25	1	1.95805e-17	1	0	PSD1_HUMAN	TM108_HUMAN	SH3G2_HUMAN	LGI1_HUMAN	HERC1_HUMAN	LRP12_HUMAN	MAP4_HUMAN	CAMP1_HUMAN	K1107_HUMAN	FRYL_HUMAN	NEB1_HUMAN	LAMB1_HUMAN	ERCC6_HUMAN	GRIN3_HUMAN	BICL1_HUMAN	CNTP2_HUMAN	NEDD4_HUMAN	SRF_HUMAN	RYK_HUMAN	ROCK1_HUMAN	SAM14_HUMAN	PTPRM_HUMAN	UCN1_HUMAN	RGMA_HUMAN	RGRF1_HUMAN	TBC23_HUMAN	MYOC_HUMAN	MILK2_HUMAN	A4_HUMAN	AGRF1_HUMAN	ALKB1_HUMAN	H0YHP2_HUMAN
biological_process	GO:0009887	animal organ morphogenesis	32	142	0.225352	1	1.79692e-08	1	0	LAMA3_HUMAN	PGBM_HUMAN	PBX1_HUMAN	LAMB4_HUMAN	ITAX_HUMAN	MEIS2_HUMAN	ETV7_HUMAN	LAMA1_HUMAN	LAMC3_HUMAN	LAMB1_HUMAN	EVL_HUMAN	COIA1_HUMAN	GREM1_HUMAN	MEGF8_HUMAN	PAX6_HUMAN	ITA2_HUMAN	EP300_HUMAN	LAMA5_HUMAN	LAMB3_HUMAN	PBX2_HUMAN	PALB2_HUMAN	T176B_HUMAN	USH2A_HUMAN	TLE5_HUMAN	PBX3_HUMAN	PTC1_HUMAN	ONEC2_HUMAN	ASXL1_HUMAN	ASXL2_HUMAN	ASXL3_HUMAN	LAMC2_HUMAN	AGRIN_HUMAN
biological_process	GO:0000902	cell morphogenesis	31	109	0.284404	1	3.63038e-19	1	0	SHRM1_HUMAN	SART3_HUMAN	HGF_HUMAN	LICH_HUMAN	ITPR1_HUMAN	CADH7_HUMAN	EPB42_HUMAN	CAP2_HUMAN	ARG28_HUMAN	FRYL_HUMAN	GREM1_HUMAN	MED1_HUMAN	CYFP2_HUMAN	NRG1_HUMAN	SSXT_HUMAN	STK4_HUMAN	SHRM3_HUMAN	TGFB2_HUMAN	SSH1_HUMAN	PTPRO_HUMAN	YAP1_HUMAN	ASXL1_HUMAN	ARHG2_HUMAN	E9PDI2_HUMAN	A0A087X0J3_HUMAN	H0Y9X0_HUMAN	B7Z385_HUMAN	A0A286YEZ9_HUMAN	A0A2R8Y5P9_HUMAN	A0A2C9F2R7_HUMAN	A0A087WZ15_HUMAN
biological_process	GO:0006310	DNA recombination	29	114	0.254386	1	9.75228e-09	1	0	MRE11_HUMAN	EXO1_HUMAN	PAXI1_HUMAN	NFRKB_HUMAN	POK8_HUMAN	POK11_HUMAN	PO113_HUMAN	POK25_HUMAN	SETX_HUMAN	RECQ4_HUMAN	POK7_HUMAN	SUV3_HUMAN	WRN_HUMAN	POK6_HUMAN	RECQ5_HUMAN	SMBP2_HUMAN	POK10_HUMAN	POK19_HUMAN	TREX1_HUMAN	RAD50_HUMAN	RAD52_HUMAN	RAD54_HUMAN	ARP8_HUMAN	IHO1_HUMAN	NSE3_HUMAN	DPOLM_HUMAN	APEX2_HUMAN	H0Y849_HUMAN	Q5YLB2_HUMAN
biological_process	GO:0008104	protein localization	29	80	0.3625	1	5.54591e-12	1	0	HAP1_HUMAN	LYST_HUMAN	HTR5A_HUMAN	LRBA_HUMAN	AP4E1_HUMAN	CE128_HUMAN	ODFP2_HUMAN	P53_HUMAN	NIN_HUMAN	SQSTM_HUMAN	USP9X_HUMAN	WNK4_HUMAN	MLH3_HUMAN	PARD3_HUMAN	VP13A_HUMAN	TESP1_HUMAN	TSC2_HUMAN	AKA11_HUMAN	AKAP4_HUMAN	NBEA_HUMAN	NBEL1_HUMAN	NBEL2_HUMAN	ALS2_HUMAN	AP4M1_HUMAN	CDAN1_HUMAN	CP250_HUMAN	AKA10_HUMAN	ERCC3_HUMAN	Q5T321_HUMAN
biological_process	GO:0007409	axonogenesis	28	83	0.337349	1	1.40828e-09	1	0	PAX2_HUMAN	SLIK4_HUMAN	MAP1B_HUMAN	LMTK2_HUMAN	DCC_HUMAN	BCL2_HUMAN	CNTP1_HUMAN	AGRB1_HUMAN	APBB1_HUMAN	CTNA2_HUMAN	ANK3_HUMAN	CREB1_HUMAN	SPTN4_HUMAN	PTPRZ_HUMAN	SLIK2_HUMAN	RYK_HUMAN	SLIK3_HUMAN	PLPR4_HUMAN	PARD3_HUMAN	TAOK2_HUMAN	PICAL_HUMAN	NUMB_HUMAN	ATLA1_HUMAN	A4_HUMAN	ALS2_HUMAN	BAIP2_HUMAN	DSCL1_HUMAN	B3KTY4_HUMAN
biological_process	GO:0022008	neurogenesis	27	65	0.415385	1	3.09479e-24	1	0	TRAK2_HUMAN	HAP1_HUMAN	EPHB1_HUMAN	CK5P2_HUMAN	ERCC6_HUMAN	DGLB_HUMAN	NEC1_HUMAN	PRDM6_HUMAN	WDR62_HUMAN	RYK_HUMAN	WNT2_HUMAN	DGLA_HUMAN	NAV2_HUMAN	NAV3_HUMAN	NU133_HUMAN	A0A2R8YFX5_HUMAN	H0YI14_HUMAN	A0A0A0MTE8_HUMAN	E9PNV5_HUMAN	A0A1B0GTC4_HUMAN	H0Y6F6_HUMAN	H0YHA8_HUMAN	F8VZV4_HUMAN	A0A0A0MTL4_HUMAN	H7BZD9_HUMAN	H0YHX7_HUMAN	A0A0A0MRJ3_HUMAN
biological_process	GO:0048812	neuron projection morphogenesis	27	68	0.397059	1	7.43488e-17	1	0	PLXB1_HUMAN	TNIK_HUMAN	SRGP2_HUMAN	MNX1_HUMAN	ITA1_HUMAN	KIRR3_HUMAN	CNTP1_HUMAN	GAS7_HUMAN	CNTP2_HUMAN	NYAP2_HUMAN	NYAP1_HUMAN	SRC8_HUMAN	TRIO_HUMAN	ZN335_HUMAN	TAOK3_HUMAN	TAOK2_HUMAN	NRK_HUMAN	ANR27_HUMAN	NEK3_HUMAN	KI20B_HUMAN	MYO16_HUMAN	M4K4_HUMAN	DREB_HUMAN	ALS2_HUMAN	F8W883_HUMAN	A0A075B6G3_HUMAN	C9JS30_HUMAN
biological_process	GO:0006351	transcription, DNA-templated	24	189	0.126984	1	3.65668e-73	1	0	TOPRS_HUMAN	MMS19_HUMAN	GPBP1_HUMAN	BAZ2A_HUMAN	EPC1_HUMAN	E2F1_HUMAN	FUBP3_HUMAN	INO80_HUMAN	MTG16_HUMAN	RPC2_HUMAN	TAF1B_HUMAN	SYF1_HUMAN	RFX3_HUMAN	PLAG1_HUMAN	DIDO1_HUMAN	MEF2A_HUMAN	HIRA_HUMAN	DTX1_HUMAN	E9PM51_HUMAN	H3BNH2_HUMAN	D4PHA4_HUMAN	B9ZVN9_HUMAN	H0YMN5_HUMAN	H3BU07_HUMAN
biological_process	GO:0071539	protein localization to centrosome	24	37	0.648649	1	7.7036e-11	1	0	PCM1_HUMAN	SPAG5_HUMAN	AURKA_HUMAN	C2CD3_HUMAN	MCPH1_HUMAN	MOONR_HUMAN	BBS4_HUMAN	CE350_HUMAN	CP131_HUMAN	PIBF1_HUMAN	CCD14_HUMAN	STIL_HUMAN	HOOK3_HUMAN	CE192_HUMAN	DCTN2_HUMAN	H0Y966_HUMAN	A0A5H1ZRS1_HUMAN	K7EPA2_HUMAN	H0YBA1_HUMAN	K7ELX0_HUMAN	A0A4W8VX11_HUMAN	A0A0A0MR42_HUMAN	K7ENP4_HUMAN	C9JT09_HUMAN
biological_process	GO:0048666	neuron development	24	64	0.375	1	1.13687e-19	1	0	PBX1_HUMAN	ALK_HUMAN	FIG4_HUMAN	HTRA2_HUMAN	MEF2C_HUMAN	PBX2_HUMAN	SEBP2_HUMAN	SCYL1_HUMAN	SRF_HUMAN	SYN1_HUMAN	TEN4_HUMAN	TGFB2_HUMAN	TEN1_HUMAN	XBP1_HUMAN	WNK1_HUMAN	TEN2_HUMAN	TEN3_HUMAN	PBX3_HUMAN	MYT1L_HUMAN	GLI2_HUMAN	DMD_HUMAN	A0A087WZL3_HUMAN	H0YCJ4_HUMAN	A0A0K2YUJ3_HUMAN
biological_process	GO:0048856	anatomical structure development	24	71	0.338028	1	1.30255e-33	1	0	PAX2_HUMAN	COT2_HUMAN	EYA1_HUMAN	PAX6_HUMAN	PAX7_HUMAN	SPRL1_HUMAN	NR2E3_HUMAN	ZEB1_HUMAN	VWDE_HUMAN	ATX1_HUMAN	AP2C_HUMAN	ATX1L_HUMAN	AP2B_HUMAN	EYA4_HUMAN	EYA3_HUMAN	A8MQ02_HUMAN	J3KN01_HUMAN	Q5TIG5_HUMAN	A0A1W2PS91_HUMAN	A0A1W2PQA8_HUMAN	E9PKM0_HUMAN	B1B1I9_HUMAN	A0A1W2PRG3_HUMAN	A0A1W2PQM7_HUMAN
biological_process	GO:0050808	synapse organization	24	67	0.358209	1	2.44149e-12	1	0	LIPB2_HUMAN	LIPA1_HUMAN	LIPA2_HUMAN	LIPA3_HUMAN	LIPA4_HUMAN	LRRT2_HUMAN	NFASC_HUMAN	CTNB1_HUMAN	PCDGM_HUMAN	ELFN1_HUMAN	SC6A1_HUMAN	TENR_HUMAN	SYN1_HUMAN	PIN1_HUMAN	TSC1_HUMAN	MYOTI_HUMAN	DRP2_HUMAN	A4_HUMAN	AGRIN_HUMAN	CTND2_HUMAN	D6RBU5_HUMAN	X6RKN2_HUMAN	H7BY57_HUMAN	A0A7P0Z4R6_HUMAN
biological_process	GO:0030182	neuron differentiation	22	151	0.145695	1	2.25963e-19	1	0	RUNX2_HUMAN	PTPRD_HUMAN	DDIT4_HUMAN	LMX1B_HUMAN	HIPK1_HUMAN	GSX1_HUMAN	ERCC6_HUMAN	FZD3_HUMAN	MEF2C_HUMAN	IRX1_HUMAN	LDB1_HUMAN	SNPH_HUMAN	RYK_HUMAN	EMX2_HUMAN	PIN1_HUMAN	WNT2_HUMAN	NTRK2_HUMAN	AT2B2_HUMAN	HXD1_HUMAN	MYT1L_HUMAN	HIPK2_HUMAN	BARH2_HUMAN
biological_process	GO:0009653	anatomical structure morphogenesis	22	137	0.160584	1	7.3331e-25	1	0	FBN3_HUMAN	FAT1_HUMAN	EZH1_HUMAN	FBN2_HUMAN	K1C18_HUMAN	EYA1_HUMAN	PAX7_HUMAN	FOXB2_HUMAN	PKD1_HUMAN	MUC18_HUMAN	SYCY1_HUMAN	SIX4_HUMAN	SOX2_HUMAN	SOX13_HUMAN	PO5F1_HUMAN	NF2L1_HUMAN	IF2B2_HUMAN	HIRA_HUMAN	BICD1_HUMAN	EYA4_HUMAN	EYA3_HUMAN	E7ET52_HUMAN
biological_process	GO:0030030	cell projection organization	22	122	0.180328	1	3.34934e-26	1	0	SDCG8_HUMAN	HAP1_HUMAN	SAXO1_HUMAN	TAPT1_HUMAN	TSC1_HUMAN	DYH9_HUMAN	CEP97_HUMAN	E2F5_HUMAN	A0A5F9ZHU6_HUMAN	A0A6Q8PGP6_HUMAN	A0A6Q8PH78_HUMAN	A0A6Q8PGC3_HUMAN	A0A7P0T8X6_HUMAN	A0A087WWU1_HUMAN	A0A6Q8PH24_HUMAN	A0A5K1VW81_HUMAN	A0A6Q8PG44_HUMAN	A0A7P0TA64_HUMAN	J3KNF5_HUMAN	A0A7P0TB57_HUMAN	A0A6Q8PGB1_HUMAN	A0A7P0T8X4_HUMAN
biological_process	GO:0007098	centrosome cycle	20	60	0.333333	1	3.93595e-09	1	0	PCM1_HUMAN	SDCG8_HUMAN	FES_HUMAN	BBS4_HUMAN	CK5P2_HUMAN	HAUS4_HUMAN	HAUS5_HUMAN	BRCA1_HUMAN	HAUS3_HUMAN	NUP62_HUMAN	XRCC2_HUMAN	CEP68_HUMAN	MYPT1_HUMAN	GOGA2_HUMAN	A0A0G2JR20_HUMAN	A0A0G2JQM2_HUMAN	A0A0G2JR50_HUMAN	A0A0C4DG71_HUMAN	G3V2T6_HUMAN	G3V541_HUMAN
biological_process	GO:0009966	regulation of signal transduction	18	92	0.195652	1	1.75472e-10	1	0	GRK6_HUMAN	NUP62_HUMAN	CDK13_HUMAN	CCNK_HUMAN	CNKR2_HUMAN	A0A2R8YGJ7_HUMAN	A0A087WV61_HUMAN	A0A2R8Y7A1_HUMAN	A0A2U3TZH5_HUMAN	G3V112_HUMAN	E5RJ23_HUMAN	A0A2R8Y700_HUMAN	A0A2R8Y622_HUMAN	A0A2R8YED7_HUMAN	A0A1W2PR95_HUMAN	A0A2R8YE71_HUMAN	A0A2R8YE27_HUMAN	A0A2R8Y5S6_HUMAN
biological_process	GO:0016358	dendrite development	18	52	0.346154	1	8.1725e-08	1	0	MAP1B_HUMAN	KLHL1_HUMAN	BBS4_HUMAN	GRIP1_HUMAN	NMD3A_HUMAN	GPR37_HUMAN	SYGP1_HUMAN	RELN_HUMAN	TUTLA_HUMAN	LAMC2_HUMAN	A4_HUMAN	BAIP2_HUMAN	DAB1_HUMAN	CREST_HUMAN	F5H4P8_HUMAN	F5H4N6_HUMAN	F5H4Q7_HUMAN	H0YFK8_HUMAN
biological_process	GO:0032465	regulation of cytokinesis	16	66	0.242424	1	2.15056e-09	1	0	PK3C3_HUMAN	PLK4_HUMAN	KI20A_HUMAN	KI13A_HUMAN	AURKA_HUMAN	ELYS_HUMAN	BBS4_HUMAN	BIRC6_HUMAN	BRCA2_HUMAN	SETD2_HUMAN	PRC1_HUMAN	PIN1_HUMAN	ZFY26_HUMAN	MYO19_HUMAN	B2CL1_HUMAN	A0A3B3IUB9_HUMAN
biological_process	GO:0034613	cellular protein localization	16	73	0.219178	1	8.81047e-12	1	0	SEPT6_HUMAN	LMNA_HUMAN	ANK2_HUMAN	GRID2_HUMAN	LTOR1_HUMAN	NIPBL_HUMAN	P53_HUMAN	SIN3A_HUMAN	SCYL1_HUMAN	MYO7A_HUMAN	DMD_HUMAN	EFC4A_HUMAN	CTNA1_HUMAN	AMOT_HUMAN	AHI1_HUMAN	A0A075B6G3_HUMAN
biological_process	GO:0007275	multicellular organism development	14	69	0.202899	1	3.38224e-29	1	0	TPO_HUMAN	CSPG2_HUMAN	DSPP_HUMAN	ATR_HUMAN	POMT1_HUMAN	ZNF45_HUMAN	ZN267_HUMAN	ZMYM3_HUMAN	ZMYM4_HUMAN	TLE5_HUMAN	ZNF7_HUMAN	CDK13_HUMAN	HXB2_HUMAN	CUX1_HUMAN
biological_process	GO:0009888	tissue development	13	35	0.371429	1	2.8765e-08	1	0	LAMA3_HUMAN	PGBM_HUMAN	LAMB4_HUMAN	LAMA1_HUMAN	LAMC3_HUMAN	LAMB1_HUMAN	MEGF8_HUMAN	LAMA5_HUMAN	LAMB3_HUMAN	USH2A_HUMAN	WT1_HUMAN	LAMC2_HUMAN	AGRIN_HUMAN
biological_process	GO:0050769	positive regulation of neurogenesis	13	32	0.40625	1	8.42982e-09	1	0	MINT_HUMAN	SNW1_HUMAN	SRRT_HUMAN	LRP2_HUMAN	HAP1_HUMAN	XRCC2_HUMAN	ZN335_HUMAN	WNT2_HUMAN	NUMB_HUMAN	ACE_HUMAN	IFNG_HUMAN	KHDC3_HUMAN	MA2A1_HUMAN
biological_process	GO:0010467	gene expression	13	59	0.220339	1	4.71906e-32	1	0	KBTB2_HUMAN	FMN1_HUMAN	GRB10_HUMAN	KCNQ1_HUMAN	NOTC1_HUMAN	EXT1_HUMAN	ANGP2_HUMAN	PAX6_HUMAN	EGR2_HUMAN	SLC31_HUMAN	LPAR3_HUMAN	AP2B_HUMAN	Q5H8Y1_HUMAN
biological_process	GO:0010569	regulation of double-strand break repair via homologous recombination	12	20	0.6	1	2.41369e-10	1	0	SHLD2_HUMAN	RTEL1_HUMAN	CHK1_HUMAN	FIGL1_HUMAN	PP4R2_HUMAN	SIR6_HUMAN	SETD2_HUMAN	TE2IP_HUMAN	TEX15_HUMAN	RFA2_HUMAN	A0A1W2PS94_HUMAN	A0A2R8Y358_HUMAN
biological_process	GO:0045595	regulation of cell differentiation	12	39	0.307692	1	2.29162e-11	1	0	RUNX2_HUMAN	APCL_HUMAN	FES_HUMAN	APC_HUMAN	CELA1_HUMAN	BCL6B_HUMAN	SIK1_HUMAN	TCFL5_HUMAN	RAF1_HUMAN	AP2B_HUMAN	NANOG_HUMAN	E7ET52_HUMAN
biological_process	GO:0007051	spindle organization	11	33	0.333333	1	3.39785e-11	1	0	SPAG5_HUMAN	AURKA_HUMAN	TRI36_HUMAN	ASPM_HUMAN	AUNIP_HUMAN	KIF11_HUMAN	CEP72_HUMAN	A0A7P0Z491_HUMAN	A0A7P0T8U9_HUMAN	H0YM11_HUMAN	A0A7P0Z4R7_HUMAN
biological_process	GO:0007154	cell communication	10	41	0.243902	1	4.62337e-10	1	0	FREM1_HUMAN	FREM2_HUMAN	FREM3_HUMAN	NF1_HUMAN	NRG1_HUMAN	CIP4_HUMAN	A4QPE4_HUMAN	A0A087WYQ1_HUMAN	A0A087WUZ3_HUMAN	C9JY79_HUMAN
biological_process	GO:0048589	developmental growth	10	27	0.37037	1	1.31514e-07	1	0	KDF1_HUMAN	NIPBL_HUMAN	SRF_HUMAN	ZMIZ1_HUMAN	ASPM_HUMAN	CHSTB_HUMAN	GLI2_HUMAN	GLI3_HUMAN	ALKB1_HUMAN	A0A7I2PJA1_HUMAN
biological_process	GO:0035459	vesicle cargo loading	10	14	0.714286	1	1.09543e-07	1	0	KI13A_HUMAN	MIA2_HUMAN	TGO1_HUMAN	PICAL_HUMAN	CTGE4_HUMAN	CTGE9_HUMAN	CTGE6_HUMAN	CTGE8_HUMAN	CTGEF_HUMAN	A0A2R8YE69_HUMAN
biological_process	GO:0048513	animal organ development	10	78	0.128205	1	9.08985e-16	1	0	NRG1_HUMAN	SPY1_HUMAN	SPY2_HUMAN	SPY3_HUMAN	A0A0D9SGI5_HUMAN	A0A3F2YNX6_HUMAN	A0A3B3IS53_HUMAN	A0A3B3ITI3_HUMAN	A0A1B0GV32_HUMAN	E7ET52_HUMAN
biological_process	GO:0007276	gamete generation	9	38	0.236842	1	4.41747e-09	1	0	FACD2_HUMAN	SPI2A_HUMAN	SPI2B_HUMAN	ZN148_HUMAN	YTHD2_HUMAN	Q5JZB8_HUMAN	A0A087X074_HUMAN	A0A1B0GU50_HUMAN	Q5JZB7_HUMAN
biological_process	GO:0031589	cell-substrate adhesion	9	20	0.45	1	1.09937e-08	1	0	SRBS1_HUMAN	FAT2_HUMAN	ANGP1_HUMAN	EPHB1_HUMAN	ITA2_HUMAN	ITB3_HUMAN	TTYH1_HUMAN	VINEX_HUMAN	VWF_HUMAN
biological_process	GO:0006996	organelle organization	9	31	0.290323	1	3.81653e-54	1	0	KIF5C_HUMAN	HPS3_HUMAN	KIF4A_HUMAN	CMGA_HUMAN	XBP1_HUMAN	HPS5_HUMAN	E9PF63_HUMAN	A0A0U1RQV4_HUMAN	K7EIG1_HUMAN
biological_process	GO:0023051	regulation of signaling	9	38	0.236842	1	6.15476e-11	1	0	LMO7_HUMAN	E9PMS6_HUMAN	A0A0A0MTE2_HUMAN	H0Y424_HUMAN	J3KP06_HUMAN	E9PMT2_HUMAN	E9PMP7_HUMAN	H0YDG6_HUMAN	F8WD26_HUMAN
biological_process	GO:0080135	regulation of cellular response to stress	9	19	0.473684	1	9.22147e-11	1	0	CRHBP_HUMAN	IF4G1_HUMAN	A0A7I2V3S7_HUMAN	Q5TE64_HUMAN	Q5QP56_HUMAN	J3KRA9_HUMAN	A0A7I2V5Q7_HUMAN	Q9H1R6_HUMAN	A0A7I2V597_HUMAN
biological_process	GO:0050767	regulation of neurogenesis	8	37	0.216216	1	1.29604e-07	1	0	PER2_HUMAN	CTNB1_HUMAN	CHD7_HUMAN	PRUN1_HUMAN	YAP1_HUMAN	X3CL1_HUMAN	YTHD2_HUMAN	BHE41_HUMAN
biological_process	GO:0045787	positive regulation of cell cycle	8	35	0.228571	1	5.88943e-10	1	0	RO52_HUMAN	LRP6_HUMAN	CHK1_HUMAN	SCND3_HUMAN	TFE2_HUMAN	TGFB2_HUMAN	HCFC1_HUMAN	CCPG1_HUMAN
biological_process	GO:0033365	protein localization to organelle	8	18	0.444444	1	9.74235e-10	1	0	ANK2_HUMAN	BBS4_HUMAN	PAX6_HUMAN	COG7_HUMAN	CEP68_HUMAN	CNTLN_HUMAN	CP250_HUMAN	BICD1_HUMAN
biological_process	GO:0007017	microtubule-based process	8	92	0.0869565	1	3.2485e-26	1	0	GTSE1_HUMAN	A8K8J9_HUMAN	F8W0F6_HUMAN	A0A7I2V4H4_HUMAN	A0A7P0Z4A1_HUMAN	K7EPE5_HUMAN	H0YI98_HUMAN	A0A7I2V4Y9_HUMAN
biological_process	GO:0023052	signaling	8	17	0.470588	1	3.40175e-11	1	0	DLGP5_HUMAN	DLGP4_HUMAN	DP13B_HUMAN	DLGP3_HUMAN	A4QPE4_HUMAN	A0A087WYQ1_HUMAN	A0A087WUZ3_HUMAN	C9JY79_HUMAN
biological_process	GO:0031023	microtubule organizing center organization	7	15	0.466667	1	1.00532e-08	1	0	MPDZ_HUMAN	SDCG8_HUMAN	CK5P2_HUMAN	GCC2_HUMAN	INADL_HUMAN	CLAP1_HUMAN	CLAP2_HUMAN
biological_process	GO:0051493	regulation of cytoskeleton organization	7	37	0.189189	1	2.08693e-11	1	0	PLXB1_HUMAN	CNTRL_HUMAN	ZO1_HUMAN	ARHG5_HUMAN	Q5JVD1_HUMAN	Q5JVD6_HUMAN	Q5JVD5_HUMAN
biological_process	GO:0051128	regulation of cellular component organization	7	21	0.333333	1	4.93397e-22	1	0	E3W994_HUMAN	H0Y5T1_HUMAN	J3KR49_HUMAN	A0A0U1RQI6_HUMAN	E7ERI8_HUMAN	E7EW49_HUMAN	F8WA11_HUMAN
biological_process	GO:0048870	cell motility	6	43	0.139535	1	4.61947e-13	1	0	ITB4_HUMAN	EGLN_HUMAN	DRC7_HUMAN	SRC8_HUMAN	DYST_HUMAN	CD34_HUMAN
biological_process	GO:2000781	positive regulation of double-strand break repair	6	18	0.333333	1	1.59717e-07	1	0	FMN2_HUMAN	FOXM1_HUMAN	ZCPW1_HUMAN	TIM_HUMAN	KHDC3_HUMAN	DDX11_HUMAN
biological_process	GO:0009058	biosynthetic process	6	76	0.0789474	1	1.90936e-08	1	0	NDUF6_HUMAN	PBLD_HUMAN	1A1L1_HUMAN	A0A0C4DFS0_HUMAN	E5RI59_HUMAN	A0A075B6P0_HUMAN
biological_process	GO:1902531	regulation of intracellular signal transduction	6	25	0.24	1	7.10172e-09	1	0	C9IZQ6_HUMAN	E7EWP2_HUMAN	H0Y465_HUMAN	F5H228_HUMAN	H7C155_HUMAN	H7BXZ5_HUMAN
biological_process	GO:0032502	developmental process	5	25	0.2	1	7.09785e-48	1	0	PLVAP_HUMAN	I11RA_HUMAN	MKKS_HUMAN	TCF23_HUMAN	IF4G1_HUMAN
biological_process	GO:0009792	embryo development ending in birth or egg hatching	5	23	0.217391	1	6.03092e-08	1	0	CELF1_HUMAN	TGFB2_HUMAN	STOX2_HUMAN	RAI2_HUMAN	ACE_HUMAN
biological_process	GO:2001020	regulation of response to DNA damage stimulus	5	11	0.454545	1	3.08831e-11	1	0	SMG1_HUMAN	ING2_HUMAN	NPAS2_HUMAN	NEK4_HUMAN	ABL1_HUMAN
biological_process	GO:0034645	cellular macromolecule biosynthetic process	5	12	0.416667	1	1.97667e-29	1	0	IF4G1_HUMAN	IF4G2_HUMAN	D6RB22_HUMAN	A0A2R8Y3N3_HUMAN	H3BM10_HUMAN
biological_process	GO:0032886	regulation of microtubule-based process	4	9	0.444444	1	7.20299e-08	1	0	MAP10_HUMAN	APC_HUMAN	MACF1_HUMAN	CLAP2_HUMAN
biological_process	GO:0046578	regulation of Ras protein signal transduction	4	8	0.5	1	4.40943e-10	1	0	FOXM1_HUMAN	NUP62_HUMAN	SQSTM_HUMAN	RGRF1_HUMAN
biological_process	GO:0048598	embryonic morphogenesis	4	15	0.266667	1	1.40125e-08	1	0	ROCK2_HUMAN	CDON_HUMAN	ROCK1_HUMAN	YTHD2_HUMAN
biological_process	GO:0016070	RNA metabolic process	4	14	0.285714	1	2.6902e-50	1	0	RFOX2_HUMAN	DDX24_HUMAN	DUS11_HUMAN	ATX2_HUMAN
biological_process	GO:0044782	cilium organization	4	34	0.117647	1	1.95613e-11	1	0	ODFP2_HUMAN	PKD2_HUMAN	T10IP_HUMAN	CFA61_HUMAN
biological_process	GO:0016570	histone modification	4	23	0.173913	1	3.63844e-09	1	0	JADE3_HUMAN	KAT7_HUMAN	UFL1_HUMAN	B4DGJ5_HUMAN
biological_process	GO:2000779	regulation of double-strand break repair	4	7	0.571429	1	1.15338e-12	1	0	PML_HUMAN	PP4R2_HUMAN	TRIPC_HUMAN	UBR5_HUMAN
biological_process	GO:0051641	cellular localization	4	12	0.333333	1	3.25352e-10	1	0	A4QPE4_HUMAN	A0A087WYQ1_HUMAN	A0A087WUZ3_HUMAN	C9JY79_HUMAN
biological_process	GO:0050793	regulation of developmental process	4	10	0.4	1	2.38469e-20	1	0	A0A7P0T8U6_HUMAN	A0A7P0TB20_HUMAN	A0A7P0TA56_HUMAN	A0A7P0T8W1_HUMAN
biological_process	GO:0051276	chromosome organization	3	24	0.125	1	1.29104e-18	1	0	CENPT_HUMAN	E9PD53_HUMAN	J3KTL8_HUMAN
biological_process	GO:0030031	cell projection assembly	3	23	0.130435	1	6.56121e-13	1	0	RHOU_HUMAN	SCIN_HUMAN	QRIC2_HUMAN
biological_process	GO:0006139	nucleobase-containing compound metabolic process	3	34	0.0882353	1	4.54588e-35	1	0	D11L8_HUMAN	DDX12_HUMAN	OAS3_HUMAN
biological_process	GO:0051252	regulation of RNA metabolic process	3	24	0.125	1	5.61884e-84	1	0	IF2B2_HUMAN	E7ETG2_HUMAN	E9PI41_HUMAN
biological_process	GO:0031346	positive regulation of cell projection organization	3	4	0.75	1	1.02872e-07	1	0	ITA2_HUMAN	PROM2_HUMAN	KAT2A_HUMAN
biological_process	GO:0060322	head development	3	13	0.230769	1	7.61234e-11	1	0	I11RA_HUMAN	LIMK2_HUMAN	DLX6_HUMAN
biological_process	GO:0002474	antigen processing and presentation of peptide antigen via MHC class I	3	11	0.272727	1	6.82446e-09	1	0	HLAH_HUMAN	ERAP1_HUMAN	ACE_HUMAN
biological_process	GO:0048699	generation of neurons	3	12	0.25	1	2.13953e-23	1	0	CTRO_HUMAN	SIX4_HUMAN	TGFB2_HUMAN
biological_process	GO:0043009	chordate embryonic development	3	4	0.75	1	4.32491e-08	1	0	BRCA1_HUMAN	CENPU_HUMAN	TRIP6_HUMAN
biological_process	GO:0000904	cell morphogenesis involved in differentiation	3	4	0.75	1	5.36285e-14	1	0	CTNB1_HUMAN	RELN_HUMAN	E9PQ73_HUMAN
biological_process	GO:2001141	regulation of RNA biosynthetic process	3	3	1	1	2.664e-81	1	0	MED1_HUMAN	MITF_HUMAN	TNR1B_HUMAN
biological_process	GO:0016043	cellular component organization	3	19	0.157895	1	5.78047e-53	1	0	Q3KPI9_HUMAN	A0A494C1A5_HUMAN	F5GWR7_HUMAN
biological_process	GO:2000112	regulation of cellular macromolecule biosynthetic process	3	5	0.6	1	1.79514e-82	1	0	H0Y4W2_HUMAN	A0A590UJ01_HUMAN	F2Z2U4_HUMAN
biological_process	GO:0072359	circulatory system development	2	8	0.25	1	2.02564e-10	1	0	PGBM_HUMAN	ABL1_HUMAN
biological_process	GO:0019222	regulation of metabolic process	2	23	0.0869565	1	1.83515e-64	1	0	LPAR3_HUMAN	J3KPH8_HUMAN
biological_process	GO:0048667	cell morphogenesis involved in neuron differentiation	2	7	0.285714	1	1.41596e-12	1	0	MEF2C_HUMAN	TBCD_HUMAN
biological_process	GO:0061564	axon development	2	16	0.125	1	3.0795e-09	1	0	SPY3_HUMAN	CAMP2_HUMAN
biological_process	GO:0043242	negative regulation of protein-containing complex disassembly	2	4	0.5	1	2.43071e-08	1	0	IRAK3_HUMAN	HDAC6_HUMAN
biological_process	GO:0048232	male gamete generation	2	4	0.5	1	2.12296e-09	1	0	ATS16_HUMAN	PRDM9_HUMAN
biological_process	GO:0048646	anatomical structure formation involved in morphogenesis	2	7	0.285714	1	1.47935e-07	1	0	DLX5_HUMAN	DLX6_HUMAN
biological_process	GO:0043170	macromolecule metabolic process	2	7	0.285714	1	1.42369e-16	1	0	E9PR16_HUMAN	G3V198_HUMAN
biological_process	GO:0035295	tube development	2	2	1	1	1.03837e-07	1	0	ITB3_HUMAN	GLI2_HUMAN
biological_process	GO:1902850	microtubule cytoskeleton organization involved in mitosis	2	2	1	1	6.6165e-14	1	0	TACC3_HUMAN	SETD2_HUMAN
biological_process	GO:0006282	regulation of DNA repair	2	10	0.2	1	5.17559e-11	1	0	POLH_HUMAN	RADX_HUMAN
biological_process	GO:0031344	regulation of cell projection organization	2	3	0.666667	1	1.46618e-09	1	0	SEM4D_HUMAN	ERMIN_HUMAN
biological_process	GO:0051173	positive regulation of nitrogen compound metabolic process	2	5	0.4	1	3.27847e-32	1	0	IFNG_HUMAN	G3V1W8_HUMAN
biological_process	GO:0070925	organelle assembly	2	6	0.333333	1	7.26474e-15	1	0	YTHD2_HUMAN	YTHD3_HUMAN
biological_process	GO:0051239	regulation of multicellular organismal process	2	8	0.25	1	9.12521e-11	1	0	E7EN07_HUMAN	G3V1W8_HUMAN
biological_process	GO:0010604	positive regulation of macromolecule metabolic process	2	4	0.5	1	4.57143e-36	1	0	G3V1W8_HUMAN	E7ET52_HUMAN
biological_process	GO:0033554	cellular response to stress	2	9	0.222222	1	7.64099e-08	1	0	A8MYV6_HUMAN	M0R104_HUMAN
biological_process	GO:0090068	positive regulation of cell cycle process	1	3	0.333333	1	3.36994e-09	1	0	UBP19_HUMAN
biological_process	GO:0048609	multicellular organismal reproductive process	1	4	0.25	1	3.74762e-08	1	0	UROL1_HUMAN
biological_process	GO:0048468	cell development	1	22	0.0454545	1	6.71979e-23	1	0	IRX1_HUMAN
biological_process	GO:0010638	positive regulation of organelle organization	1	3	0.333333	1	1.11164e-07	1	0	LMAN1_HUMAN
biological_process	GO:0010564	regulation of cell cycle process	1	14	0.0714286	1	3.11791e-15	1	0	BIN1_HUMAN
biological_process	GO:0097435	supramolecular fiber organization	1	15	0.0666667	1	7.64326e-13	1	0	LTBP2_HUMAN
biological_process	GO:0044089	positive regulation of cellular component biogenesis	1	1	1	1	3.07793e-08	1	0	LDB2_HUMAN
biological_process	GO:0048858	cell projection morphogenesis	1	3	0.333333	1	2.21606e-16	1	0	NEST_HUMAN
biological_process	GO:0042590	antigen processing and presentation of exogenous peptide antigen via MHC class I	1	5	0.2	1	3.68364e-08	1	0	HLAA_HUMAN
biological_process	GO:1902115	regulation of organelle assembly	1	4	0.25	1	1.52225e-07	1	0	VPS11_HUMAN
biological_process	GO:1903507	negative regulation of nucleic acid-templated transcription	1	4	0.25	1	1.11433e-29	1	0	ZN653_HUMAN
biological_process	GO:0033043	regulation of organelle organization	1	2	0.5	1	4.06756e-16	1	0	CAMP2_HUMAN
biological_process	GO:0051171	regulation of nitrogen compound metabolic process	1	4	0.25	1	9.88913e-72	1	0	BCR_HUMAN
biological_process	GO:0022607	cellular component assembly	1	2	0.5	1	1.92917e-10	1	0	LDB1_HUMAN
biological_process	GO:0010452	histone H3-K36 methylation	1	2	0.5	1	7.14736e-08	1	0	SETD3_HUMAN
biological_process	GO:1902680	positive regulation of RNA biosynthetic process	1	2	0.5	1	1.22706e-36	1	0	NMD3_HUMAN
biological_process	GO:1903508	positive regulation of nucleic acid-templated transcription	1	1	1	1	7.99382e-36	1	0	ZMIZ1_HUMAN
biological_process	GO:0045103	intermediate filament-based process	1	1	1	1	9.18591e-14	1	0	SYNCI_HUMAN
biological_process	GO:0048583	regulation of response to stimulus	1	23	0.0434783	1	8.16278e-11	1	0	C9JIG9_HUMAN
biological_process	GO:0090304	nucleic acid metabolic process	1	3	0.333333	1	2.32985e-52	1	0	A0A494C1A5_HUMAN
biological_process	GO:0009790	embryo development	1	2	0.5	1	7.82255e-15	1	0	A0A590UJS4_HUMAN
biological_process	GO:0030029	actin filament-based process	0	2	0	1	3.75418e-17	1	0
biological_process	GO:0022414	reproductive process	0	6	0	1	4.70266e-10	1	0
biological_process	GO:0051640	organelle localization	0	2	0	1	1.3094e-07	1	0
biological_process	GO:0046483	heterocycle metabolic process	0	6	0	1	2.52528e-29	1	0
biological_process	GO:0080090	regulation of primary metabolic process	0	7	0	1	1.08321e-69	1	0
biological_process	GO:0000018	regulation of DNA recombination	0	6	0	1	4.22337e-09	1	0
biological_process	GO:0051960	regulation of nervous system development	0	2	0	1	1.89984e-08	1	0
biological_process	GO:0003006	developmental process involved in reproduction	0	5	0	1	3.65882e-09	1	0
biological_process	GO:0000725	recombinational repair	0	3	0	1	1.10327e-12	1	0
biological_process	GO:0031328	positive regulation of cellular biosynthetic process	0	3	0	1	2.21264e-32	1	0
biological_process	GO:0048002	antigen processing and presentation of peptide antigen	0	3	0	1	1.25422e-07	1	0
biological_process	GO:0044380	protein localization to cytoskeleton	0	2	0	1	4.82815e-09	1	0
biological_process	GO:0000003	reproduction	0	4	0	1	5.92388e-10	1	0
biological_process	GO:0035239	tube morphogenesis	0	1	0	1	2.59811e-08	1	0
biological_process	GO:0048731	system development	0	3	0	1	2.66446e-27	1	0
biological_process	GO:0009890	negative regulation of biosynthetic process	0	4	0	1	4.25769e-29	1	0
biological_process	GO:0040011	locomotion	0	7	0	1	2.35761e-13	1	0
biological_process	GO:0032990	cell part morphogenesis	0	1	0	1	6.29359e-16	1	0
biological_process	GO:1902903	regulation of supramolecular fiber organization	0	1	0	1	1.6395e-07	1	0
biological_process	GO:1902679	negative regulation of RNA biosynthetic process	0	2	0	1	1.56442e-29	1	0
biological_process	GO:0120035	regulation of plasma membrane bounded cell projection organization	0	3	0	1	2.5949e-08	1	0
biological_process	GO:0051494	negative regulation of cytoskeleton organization	0	1	0	1	5.38198e-08	1	0
biological_process	GO:0010557	positive regulation of macromolecule biosynthetic process	0	1	0	1	1.94907e-35	1	0
biological_process	GO:1903506	regulation of nucleic acid-templated transcription	0	2	0	1	1.98825e-80	1	0
biological_process	GO:0019438	aromatic compound biosynthetic process	0	1	0	1	4.30215e-52	1	0
biological_process	GO:0120036	plasma membrane bounded cell projection organization	0	2	0	1	7.32052e-27	1	0
biological_process	GO:0010720	positive regulation of cell development	0	1	0	1	1.86573e-08	1	0
biological_process	GO:0051054	positive regulation of DNA metabolic process	0	2	0	1	3.68822e-08	1	0
biological_process	GO:0006725	cellular aromatic compound metabolic process	0	1	0	1	2.16606e-30	1	0
biological_process	GO:0010646	regulation of cell communication	0	6	0	1	4.52948e-10	1	0
biological_process	GO:0060255	regulation of macromolecule metabolic process	0	7	0	1	1.37099e-73	1	0
biological_process	GO:0044085	cellular component biogenesis	0	10	0	1	6.88051e-09	1	0
biological_process	GO:0034641	cellular nitrogen compound metabolic process	0	10	0	1	3.87045e-12	1	0
biological_process	GO:0051094	positive regulation of developmental process	0	2	0	1	2.91958e-09	1	0
biological_process	GO:0044249	cellular biosynthetic process	0	1	0	1	3.90306e-11	1	0
biological_process	GO:1901576	organic substance biosynthetic process	0	1	0	1	1.24808e-08	1	0
biological_process	GO:0044260	cellular macromolecule metabolic process	0	2	0	1	5.3669e-23	1	0
biological_process	GO:0022603	regulation of anatomical structure morphogenesis	0	2	0	1	1.45955e-07	1	0
biological_process	GO:0051130	positive regulation of cellular component organization	0	1	0	1	1.76285e-11	1	0
biological_process	GO:0051052	regulation of DNA metabolic process	0	1	0	1	1.69158e-10	1	0
biological_process	GO:0006281	DNA repair	148	553	0.267631	1	2.4657e-07	1	0.001	REXO4_HUMAN	SHLD2_HUMAN	MRE11_HUMAN	TICRR_HUMAN	RTEL1_HUMAN	TRRAP_HUMAN	SMC1A_HUMAN	SOSB1_HUMAN	SMG1_HUMAN	SLX4_HUMAN	RENT1_HUMAN	ETAA1_HUMAN	MMS19_HUMAN	FANCI_HUMAN	FANCC_HUMAN	CTIP_HUMAN	FUMH_HUMAN	HELB_HUMAN	HERC2_HUMAN	CE164_HUMAN	CHK1_HUMAN	ERCC6_HUMAN	FOXM1_HUMAN	ATR_HUMAN	FZR1_HUMAN	EXO1_HUMAN	PAXI1_HUMAN	KIF22_HUMAN	INO80_HUMAN	KAT7_HUMAN	NFRKB_HUMAN	CAF1B_HUMAN	CLSPN_HUMAN	MDC1_HUMAN	PNKP_HUMAN	CHD1L_HUMAN	MEN1_HUMAN	RIF1_HUMAN	SMC3_HUMAN	PARP3_HUMAN
biological_process	GO:0006468	protein phosphorylation	118	407	0.289926	1	3.49683e-07	1	0.001	PEAK1_HUMAN	PEAK3_HUMAN	PK3C3_HUMAN	PLK4_HUMAN	STK36_HUMAN	TAF6_HUMAN	TAF8_HUMAN	MYLK_HUMAN	STK39_HUMAN	TNIK_HUMAN	STK24_HUMAN	ROCK2_HUMAN	MAK_HUMAN	BMP2K_HUMAN	KALRN_HUMAN	LMTK2_HUMAN	MARK3_HUMAN	M3K12_HUMAN	MAST1_HUMAN	M3K1_HUMAN	MAST2_HUMAN	MAPK2_HUMAN	M3K20_HUMAN	M3K6_HUMAN	ACVL1_HUMAN	CDKL5_HUMAN	LIMK1_HUMAN	AURKA_HUMAN	HIPK1_HUMAN	MK06_HUMAN	HIPK3_HUMAN	IRAK3_HUMAN	INSR_HUMAN	LAMA1_HUMAN	CHK1_HUMAN	JAK3_HUMAN	CDK8_HUMAN	BIRC6_HUMAN	ERN2_HUMAN	GRK6_HUMAN
biological_process	GO:0007160	cell-matrix adhesion	56	176	0.318182	1	4.43455e-07	1	0.001	URP2_HUMAN	MKLN1_HUMAN	MUC4_HUMAN	SRBS1_HUMAN	LIPA1_HUMAN	LIPA2_HUMAN	ITA1_HUMAN	ITB4_HUMAN	ATS13_HUMAN	ITA3_HUMAN	ITAL_HUMAN	CTNB1_HUMAN	FINC_HUMAN	ANGL3_HUMAN	FREM1_HUMAN	ITA2_HUMAN	ITB3_HUMAN	NID1_HUMAN	PKD1_HUMAN	SRF_HUMAN	NID2_HUMAN	TENX_HUMAN	MADCA_HUMAN	ZYX_HUMAN	OTOAN_HUMAN	TSC1_HUMAN	ATS12_HUMAN	ITA2B_HUMAN	CD34_HUMAN	E7EWN1_HUMAN	A0A0G2JQC6_HUMAN	A0A0G2JR43_HUMAN	A0A0G2JR97_HUMAN	A0A0G2JS65_HUMAN	A0A0G2JRA1_HUMAN	E7ETT5_HUMAN	A0A0G2JQK9_HUMAN	E7EQT2_HUMAN	A0A0G2JNM3_HUMAN	A0A0G2JNL3_HUMAN
biological_process	GO:0032956	regulation of actin cytoskeleton organization	40	123	0.325203	1	5.02125e-07	1	0.001	PEAK3_HUMAN	ROCK2_HUMAN	GRDN_HUMAN	LRP1_HUMAN	HIP1R_HUMAN	DIXC1_HUMAN	RHG44_HUMAN	RHG17_HUMAN	RND3_HUMAN	ROCK1_HUMAN	RHG18_HUMAN	TAOK2_HUMAN	CELR1_HUMAN	ARHG5_HUMAN	CLAP2_HUMAN	BAIP2_HUMAN	ABL1_HUMAN	A0A2R8Y7B1_HUMAN	E9PF63_HUMAN	H7C2C6_HUMAN	A0A2R8YDS8_HUMAN	A0A2R8YGU1_HUMAN	I3L2M4_HUMAN	A0A2R8Y820_HUMAN	A0A2R8YG73_HUMAN	I3L327_HUMAN	H0Y470_HUMAN	A0A2R8YCU9_HUMAN	I3L526_HUMAN	A0A2R8Y4W8_HUMAN	A0A6I8PRU0_HUMAN	I3L125_HUMAN	I3L4C2_HUMAN	H0Y7U8_HUMAN	I3L0M4_HUMAN	A0A2R8Y885_HUMAN	A0A2U3TZV9_HUMAN	A0A2R8Y7D4_HUMAN	I3L1C8_HUMAN	A0A2R8Y4X4_HUMAN
biological_process	GO:0001822	kidney development	38	120	0.316667	1	3.65716e-07	1	0.001	PLXD1_HUMAN	PK1L3_HUMAN	TNS2_HUMAN	SALL1_HUMAN	LRP2_HUMAN	GRB1L_HUMAN	AP1B1_HUMAN	HELLS_HUMAN	FTM_HUMAN	CNTRL_HUMAN	CENPF_HUMAN	BROMI_HUMAN	FREM2_HUMAN	DYHC2_HUMAN	PKD1_HUMAN	PRDM1_HUMAN	C1GLT_HUMAN	CE290_HUMAN	PYGO1_HUMAN	SGPL1_HUMAN	PKHD1_HUMAN	ZBT14_HUMAN	PARPT_HUMAN	WT1_HUMAN	TGFB2_HUMAN	TREX1_HUMAN	TSC1_HUMAN	RENI_HUMAN	ACE_HUMAN	AP2B1_HUMAN	AP2B_HUMAN	IFT88_HUMAN	HNF1B_HUMAN	BICC1_HUMAN	CIKS_HUMAN	GLI2_HUMAN	A0A7I2PJA1_HUMAN	A0A494BZW6_HUMAN
biological_process	GO:1905515	non-motile cilium assembly	30	73	0.410959	1	4.35873e-07	1	0.001	PCM1_HUMAN	C2CD3_HUMAN	CE126_HUMAN	KCNQ1_HUMAN	FTM_HUMAN	BBS4_HUMAN	CE350_HUMAN	BBS10_HUMAN	BROMI_HUMAN	DYHC2_HUMAN	INTU_HUMAN	CP131_HUMAN	PIBF1_HUMAN	CE290_HUMAN	MKKS_HUMAN	TGRM1_HUMAN	TTC8_HUMAN	RPGR1_HUMAN	IFT74_HUMAN	IFT88_HUMAN	CEP89_HUMAN	CENPJ_HUMAN	CP250_HUMAN	A0A0C4DGX9_HUMAN	G3V2Z9_HUMAN	H0YJX0_HUMAN	A0A0C4DGH8_HUMAN	G3V324_HUMAN	A0A0C4DGY3_HUMAN	Q86U25_HUMAN
biological_process	GO:0031032	actomyosin structure organization	24	45	0.533333	1	3.21418e-07	1	0.001	ROCK2_HUMAN	CNN1_HUMAN	E41L2_HUMAN	E41L5_HUMAN	FRMD3_HUMAN	CTRO_HUMAN	LIMC1_HUMAN	MRCKB_HUMAN	MRCKG_HUMAN	MRCKA_HUMAN	ROCK1_HUMAN	ZO1_HUMAN	MYH9_HUMAN	MY18A_HUMAN	MYH10_HUMAN	CNN2_HUMAN	CNN3_HUMAN	A0A087X1X5_HUMAN	K7ER02_HUMAN	D6RD46_HUMAN	K7EQ72_HUMAN	B7Z7E1_HUMAN	B4DDF4_HUMAN	B4DUT8_HUMAN
biological_process	GO:0000077	DNA damage checkpoint signaling	23	58	0.396552	1	3.95596e-07	1	0.001	TP53B_HUMAN	M3K20_HUMAN	CLOCK_HUMAN	CHK1_HUMAN	ERCC6_HUMAN	E2F1_HUMAN	ATR_HUMAN	CHK2_HUMAN	CLSPN_HUMAN	TIPRL_HUMAN	UBP28_HUMAN	RAD17_HUMAN	NBN_HUMAN	INT7_HUMAN	E2AK4_HUMAN	DONS_HUMAN	CEP63_HUMAN	ATM_HUMAN	A0A6Q8PH76_HUMAN	A0A0G2JP78_HUMAN	A0A0G2JPT5_HUMAN	A0A0G2JNH5_HUMAN	E9PIN0_HUMAN
biological_process	GO:0060285	cilium-dependent cell motility	12	23	0.521739	1	4.01735e-07	1	0.001	DYH1_HUMAN	DYH3_HUMAN	DYH7_HUMAN	DYH14_HUMAN	DYH6_HUMAN	RFX3_HUMAN	DYH2_HUMAN	DRC2_HUMAN	DYH17_HUMAN	H7BXS7_HUMAN	H9KV43_HUMAN	A0A1W2PR53_HUMAN
biological_process	GO:0051298	centrosome duplication	11	26	0.423077	1	2.18036e-07	1	0.001	ROCK2_HUMAN	BRCA2_HUMAN	STIL_HUMAN	PKD2_HUMAN	UBP33_HUMAN	H0Y966_HUMAN	K7EPA2_HUMAN	K7ELX0_HUMAN	A0A0A0MR42_HUMAN	K7ENP4_HUMAN	C9JT09_HUMAN
biological_process	GO:0034504	protein localization to nucleus	10	35	0.285714	1	3.71188e-07	1	0.001	TOPRS_HUMAN	LMNA_HUMAN	HHEX_HUMAN	FYV1_HUMAN	PAF1_HUMAN	PYGO1_HUMAN	SIX4_HUMAN	MDM2_HUMAN	TOIP1_HUMAN	XPO1_HUMAN
biological_process	GO:0010975	regulation of neuron projection development	7	38	0.184211	1	2.47038e-07	1	0.001	GRDN_HUMAN	CTNA2_HUMAN	GRID2_HUMAN	S39AC_HUMAN	ULK4_HUMAN	TBR1_HUMAN	Z804A_HUMAN
biological_process	GO:1901522	positive regulation of transcription from RNA polymerase II promoter involved in cellular response to chemical stimulus	3	10	0.3	1	1.8007e-07	1	0.001	RUNX2_HUMAN	DLX5_HUMAN	ATF2_HUMAN
biological_process	GO:0001655	urogenital system development	2	14	0.142857	1	3.20293e-07	1	0.001	PAX2_HUMAN	ACVR1_HUMAN
biological_process	GO:0033036	macromolecule localization	2	5	0.4	1	4.80514e-07	1	0.001	E9PR16_HUMAN	G3V198_HUMAN
biological_process	GO:0032970	regulation of actin filament-based process	1	3	0.333333	1	1.94526e-07	1	0.001	CNN2_HUMAN
biological_process	GO:0031399	regulation of protein modification process	1	3	0.333333	1	4.25826e-07	1	0.001	A0A499FJS7_HUMAN
biological_process	GO:0019953	sexual reproduction	0	7	0	1	1.7894e-07	1	0.001
biological_process	GO:0051093	negative regulation of developmental process	0	4	0	1	4.40726e-07	1	0.001
biological_process	GO:0072006	nephron development	6	9	0.666667	1	7.47475e-07	1	0.002	ITA3_HUMAN	NUP85_HUMAN	PCD23_HUMAN	NU107_HUMAN	NU133_HUMAN	NU160_HUMAN
biological_process	GO:0032268	regulation of cellular protein metabolic process	2	15	0.133333	0.999999	8.53348e-07	1	0.002	SSH1_HUMAN	A0A3B3IUB9_HUMAN
biological_process	GO:0098813	nuclear chromosome segregation	0	1	0	1	8.69398e-07	1	0.002
biological_process	GO:0010628	positive regulation of gene expression	105	457	0.229759	0.999999	1.23431e-06	1	0.004	PDE2A_HUMAN	RBMS3_HUMAN	RUNX2_HUMAN	NF2L2_HUMAN	TITIN_HUMAN	TT21B_HUMAN	ROCK2_HUMAN	HIF1A_HUMAN	LRP3_HUMAN	LRC32_HUMAN	MAZ_HUMAN	HTF4_HUMAN	LMNA_HUMAN	KAT6A_HUMAN	ANK2_HUMAN	HGS_HUMAN	KDM5B_HUMAN	ITAX_HUMAN	ANGP1_HUMAN	LEG9B_HUMAN	MED26_HUMAN	NFAT5_HUMAN	LAMP3_HUMAN	NOTC1_HUMAN	DGKQ_HUMAN	EGR1_HUMAN	EGLN_HUMAN	ERPG3_HUMAN	ITA3_HUMAN	ATMIN_HUMAN	BRCA1_HUMAN	CTNB1_HUMAN	FINC_HUMAN	E2F1_HUMAN	CNTN1_HUMAN	ANK3_HUMAN	APOB_HUMAN	CELF1_HUMAN	DHX36_HUMAN	FUBP3_HUMAN
biological_process	GO:0007156	homophilic cell adhesion via plasma membrane adhesion molecules	85	283	0.300353	0.999999	1.45581e-06	1	0.004	PECA1_HUMAN	PLXB2_HUMAN	PLXB3_HUMAN	PCDG9_HUMAN	PCDGJ_HUMAN	PCDGE_HUMAN	PCDG6_HUMAN	ROBO3_HUMAN	ROBO2_HUMAN	FAT2_HUMAN	CDHR5_HUMAN	CADH7_HUMAN	KIRR3_HUMAN	FAT3_HUMAN	IGS11_HUMAN	FAT1_HUMAN	IGFN1_HUMAN	PCDB5_HUMAN	CDHR2_HUMAN	PCDG1_HUMAN	PCDGM_HUMAN	PC11X_HUMAN	DSC3_HUMAN	PCDGI_HUMAN	PKD1_HUMAN	PCDG3_HUMAN	PCDG2_HUMAN	NECT1_HUMAN	PCDGH_HUMAN	NECT4_HUMAN	SDK2_HUMAN	PCDH7_HUMAN	ROBO4_HUMAN	PCDBG_HUMAN	PCDGG_HUMAN	PTPRT_HUMAN	PCDGC_HUMAN	PCD15_HUMAN	PCD20_HUMAN	PCD23_HUMAN
biological_process	GO:0032508	DNA duplex unwinding	23	35	0.657143	1	1.15575e-06	1	0.004	MRE11_HUMAN	RTEL1_HUMAN	CTF18_HUMAN	D11L8_HUMAN	DHX9_HUMAN	DDX1_HUMAN	DDX12_HUMAN	MCMD2_HUMAN	RECQ4_HUMAN	SUV3_HUMAN	WRN_HUMAN	MCM9_HUMAN	RECQ5_HUMAN	RFC3_HUMAN	TREX1_HUMAN	RAD50_HUMAN	NBN_HUMAN	DDX11_HUMAN	ASCC3_HUMAN	DCC1_HUMAN	B4DXX4_HUMAN	G3XAN3_HUMAN	Q7Z6P5_HUMAN
biological_process	GO:0090307	mitotic spindle assembly	19	44	0.431818	1	1.39435e-06	1	0.004	SMC1A_HUMAN	LS14A_HUMAN	ABRX2_HUMAN	CDC20_HUMAN	KIFC2_HUMAN	PIBF1_HUMAN	CHK2_HUMAN	SPICE_HUMAN	SMC3_HUMAN	TGRM1_HUMAN	TGRM2_HUMAN	KIFC1_HUMAN	KIF2A_HUMAN	KIF11_HUMAN	GOGA2_HUMAN	CE192_HUMAN	CLAP1_HUMAN	CLAP2_HUMAN	H7C5N4_HUMAN
biological_process	GO:0030837	negative regulation of actin filament polymerization	16	37	0.432432	1	1.00945e-06	1	0.004	KANK1_HUMAN	FHOD3_HUMAN	HIP1R_HUMAN	KANK3_HUMAN	BBS4_HUMAN	BIG1_HUMAN	MKKS_HUMAN	SSH2_HUMAN	SSH3_HUMAN	SSH1_HUMAN	TWF1_HUMAN	F8VS81_HUMAN	A0A3B3IS79_HUMAN	F5H527_HUMAN	A0A087WWG1_HUMAN	C9JUG3_HUMAN
biological_process	GO:0006303	double-strand break repair via nonhomologous end joining	15	37	0.405405	1	1.13495e-06	1	0.004	MRE11_HUMAN	TP53B_HUMAN	APLF_HUMAN	DCR1B_HUMAN	PNKP_HUMAN	PRKDC_HUMAN	RNF8_HUMAN	XRCC1_HUMAN	DPOLA_HUMAN	DPOLL_HUMAN	DPOLM_HUMAN	ATM_HUMAN	DCR1C_HUMAN	DCR1A_HUMAN	F5H8D7_HUMAN
biological_process	GO:2000145	regulation of cell motility	10	16	0.625	0.999999	1.45364e-06	1	0.004	ROCK2_HUMAN	FES_HUMAN	SAC2_HUMAN	ROCK1_HUMAN	RHG18_HUMAN	PRAG1_HUMAN	RAF1_HUMAN	ABL1_HUMAN	CADM4_HUMAN	F8W912_HUMAN
biological_process	GO:0140014	mitotic nuclear division	5	15	0.333333	0.999999	1.09349e-06	1	0.004	UBP16_HUMAN	I3L4A1_HUMAN	I3L3E4_HUMAN	A0A087WW88_HUMAN	I3L4G8_HUMAN
biological_process	GO:0051246	regulation of protein metabolic process	2	5	0.4	0.999999	1.08362e-06	1	0.004	ROCK2_HUMAN	LDLR_HUMAN
biological_process	GO:0032984	protein-containing complex disassembly	2	2	1	0.999999	1.24261e-06	1	0.004	DDIT4_HUMAN	HDAC6_HUMAN
biological_process	GO:0060249	anatomical structure homeostasis	1	1	1	0.999999	1.30125e-06	1	0.004	A0A590UJT3_HUMAN
biological_process	GO:0032269	negative regulation of cellular protein metabolic process	0	5	0	0.999999	1.02559e-06	1	0.004
biological_process	GO:0060562	epithelial tube morphogenesis	0	1	0	0.999999	1.58731e-06	1	0.004
biological_process	GO:0051270	regulation of cellular component movement	0	1	0	0.999999	9.2938e-07	1	0.004
biological_process	GO:0018205	peptidyl-lysine modification	0	1	0	0.999999	1.06611e-06	1	0.004
biological_process	GO:0051248	negative regulation of protein metabolic process	2	4	0.5	0.999999	1.79139e-06	1	0.005	LIRB2_HUMAN	LDLR_HUMAN
biological_process	GO:0043067	regulation of programmed cell death	1	4	0.25	0.999999	1.86842e-06	1	0.005	BNIP3_HUMAN
biological_process	GO:0034968	histone lysine methylation	1	14	0.0714286	0.999999	1.89144e-06	1	0.005	EHMT2_HUMAN
biological_process	GO:0032392	DNA geometric change	0	4	0	0.999999	1.88993e-06	1	0.005
biological_process	GO:0001764	neuron migration	40	117	0.34188	0.999999	2.51277e-06	1	0.006	PCM1_HUMAN	SDCG8_HUMAN	MAP1B_HUMAN	MDGA1_HUMAN	DDIT4_HUMAN	LRP12_HUMAN	KIRR3_HUMAN	CDKL5_HUMAN	DCC_HUMAN	BBS4_HUMAN	ITA3_HUMAN	CTNB1_HUMAN	COT2_HUMAN	FZD3_HUMAN	PAX6_HUMAN	MEF2C_HUMAN	NCHL1_HUMAN	CE85L_HUMAN	SATB2_HUMAN	SH3R1_HUMAN	SRF_HUMAN	USP9X_HUMAN	RELN_HUMAN	UFO_HUMAN	NTRK3_HUMAN	NTRK2_HUMAN	CELR1_HUMAN	CELR2_HUMAN	ASPM_HUMAN	ASTN2_HUMAN	NAV1_HUMAN	NEO1_HUMAN	AUTS2_HUMAN	BARH2_HUMAN	ALKB1_HUMAN	AGRL3_HUMAN	A0A7P0TA83_HUMAN	J3KQ66_HUMAN	E9PQ73_HUMAN	A0A6I8PRU0_HUMAN
biological_process	GO:0030155	regulation of cell adhesion	39	89	0.438202	0.999998	2.37269e-06	1	0.006	LAMA3_HUMAN	ROCK2_HUMAN	LMO7_HUMAN	FES_HUMAN	KIF14_HUMAN	LAMA1_HUMAN	EGLN_HUMAN	PML_HUMAN	LAMA4_HUMAN	LAMA5_HUMAN	FAF1_HUMAN	PKD1_HUMAN	PKHD1_HUMAN	SPI2_HUMAN	SRF_HUMAN	PRLR_HUMAN	ROCK1_HUMAN	PKP4_HUMAN	RET_HUMAN	YTHD2_HUMAN	NEUS_HUMAN	MYPT1_HUMAN	ABL1_HUMAN	CBLL2_HUMAN	E9PMS6_HUMAN	A0A0A0MTE2_HUMAN	H0Y424_HUMAN	J3KP06_HUMAN	E9PMT2_HUMAN	E9PMP7_HUMAN	A0A0A6YYF2_HUMAN	A0A0A0MSA0_HUMAN	K7EIP4_HUMAN	A0A0A0MTC7_HUMAN	A0A3B3ITG1_HUMAN	H0YDG6_HUMAN	A0A0A0MQS9_HUMAN	F8WD26_HUMAN	A0A0A0MTS5_HUMAN
biological_process	GO:0006259	DNA metabolic process	11	29	0.37931	0.999998	2.13344e-06	1	0.006	MMS19_HUMAN	WRN_HUMAN	RECQ5_HUMAN	TREX1_HUMAN	MY18A_HUMAN	DPOG1_HUMAN	M0QYI1_HUMAN	A0A1B0GU66_HUMAN	M0R000_HUMAN	A0A0D9SFK2_HUMAN	A0A0D9SEV0_HUMAN
biological_process	GO:0098742	cell-cell adhesion via plasma-membrane adhesion molecules	7	37	0.189189	0.999999	2.31869e-06	1	0.006	PECA1_HUMAN	CADH7_HUMAN	ITAM_HUMAN	CEAM1_HUMAN	CAD26_HUMAN	CADH4_HUMAN	AGRL3_HUMAN
biological_process	GO:0045597	positive regulation of cell differentiation	5	36	0.138889	0.999999	2.19139e-06	1	0.006	DLX1_HUMAN	DLX2_HUMAN	SOX2_HUMAN	SRF_HUMAN	ZN268_HUMAN
biological_process	GO:0044773	mitotic DNA damage checkpoint signaling	2	3	0.666667	0.999999	2.56043e-06	1	0.006	CHK2_HUMAN	STK33_HUMAN
biological_process	GO:0040012	regulation of locomotion	0	8	0	0.999998	2.49163e-06	1	0.006
biological_process	GO:1902904	negative regulation of supramolecular fiber organization	0	1	0	0.999999	2.29031e-06	1	0.006
biological_process	GO:0061157	mRNA destabilization	8	15	0.533333	0.999999	3.15617e-06	1	0.007	ROCK2_HUMAN	CELF1_HUMAN	GGYF2_HUMAN	ROCK1_HUMAN	PUM1_HUMAN	YTHD2_HUMAN	YTHD3_HUMAN	MET16_HUMAN
biological_process	GO:0046605	regulation of centrosome cycle	3	5	0.6	0.999999	3.27766e-06	1	0.007	AURKA_HUMAN	MCPH1_HUMAN	WDR62_HUMAN
biological_process	GO:0050779	RNA destabilization	1	4	0.25	0.999999	3.44305e-06	1	0.007	TNR1B_HUMAN
biological_process	GO:0043244	regulation of protein-containing complex disassembly	1	1	1	0.999999	2.98384e-06	1	0.007	IRAK3_HUMAN
biological_process	GO:2001252	positive regulation of chromosome organization	0	2	0	0.999999	2.90573e-06	1	0.007
biological_process	GO:0048729	tissue morphogenesis	0	3	0	0.999998	2.98545e-06	1	0.007
biological_process	GO:0030900	forebrain development	16	48	0.333333	0.999998	3.57472e-06	1	0.008	LRP2_HUMAN	HTRA2_HUMAN	NOTC1_HUMAN	ITAM_HUMAN	E2F1_HUMAN	COT2_HUMAN	DYHC2_HUMAN	KDM2B_HUMAN	STIL_HUMAN	OTX2_HUMAN	SOX2_HUMAN	SETD2_HUMAN	SSR3_HUMAN	ZEB1_HUMAN	A4_HUMAN	F6TDF5_HUMAN
biological_process	GO:0010941	regulation of cell death	1	8	0.125	0.999997	3.56543e-06	1	0.008	CLNK_HUMAN
biological_process	GO:0042981	regulation of apoptotic process	73	298	0.244966	0.999997	3.85418e-06	1	0.009	UROL1_HUMAN	RASF5_HUMAN	NLRP1_HUMAN	SLK_HUMAN	LRP5_HUMAN	MAGD1_HUMAN	MALT1_HUMAN	ALK_HUMAN	DAXX_HUMAN	BCAR1_HUMAN	EGR1_HUMAN	MADD_HUMAN	JAK3_HUMAN	B2L13_HUMAN	CAR11_HUMAN	BIRC1_HUMAN	HAX1_HUMAN	NOD1_HUMAN	P53_HUMAN	U17L3_HUMAN	TADBP_HUMAN	WRN_HUMAN	UL17C_HUMAN	TIF1A_HUMAN	U17LO_HUMAN	U17LB_HUMAN	U17LM_HUMAN	U17LF_HUMAN	U17LA_HUMAN	U17L5_HUMAN	U17L7_HUMAN	U17LH_HUMAN	U17LJ_HUMAN	U17LI_HUMAN	TR10B_HUMAN	U17L4_HUMAN	UBP42_HUMAN	U17LL_HUMAN	TOX3_HUMAN	U17L6_HUMAN
biological_process	GO:0007265	Ras protein signal transduction	11	80	0.1375	0.999998	3.96989e-06	1	0.009	MAPK5_HUMAN	CNKR1_HUMAN	GRP1_HUMAN	GRP3_HUMAN	P53_HUMAN	NF1_HUMAN	SYGP1_HUMAN	RPGF6_HUMAN	SETB1_HUMAN	UBP28_HUMAN	BRAP_HUMAN
biological_process	GO:0007389	pattern specification process	10	35	0.285714	0.999998	3.98793e-06	1	0.009	RN111_HUMAN	APCL_HUMAN	APC_HUMAN	EYA1_HUMAN	SYGP1_HUMAN	SHRM3_HUMAN	ZEB1_HUMAN	TBX5_HUMAN	GLI2_HUMAN	F6TDF5_HUMAN
biological_process	GO:2001022	positive regulation of response to DNA damage stimulus	8	21	0.380952	0.999998	3.76866e-06	1	0.009	BCLF1_HUMAN	PAXI1_HUMAN	E9PK09_HUMAN	A0A1W2PQ43_HUMAN	E9PQN2_HUMAN	E9PJA7_HUMAN	E9PKI6_HUMAN	E9PK91_HUMAN
biological_process	GO:1902275	regulation of chromatin organization	3	9	0.333333	0.999998	3.83844e-06	1	0.009	SET1A_HUMAN	SETD5_HUMAN	KI67_HUMAN
biological_process	GO:0034329	cell junction assembly	2	8	0.25	0.999998	3.94973e-06	1	0.009	GRHL2_HUMAN	MYO9A_HUMAN
biological_process	GO:1901987	regulation of cell cycle phase transition	2	3	0.666667	0.999998	3.96446e-06	1	0.009	DBF4A_HUMAN	DBF4B_HUMAN
biological_process	GO:0044774	mitotic DNA integrity checkpoint signaling	0	1	0	0.999999	3.81033e-06	1	0.009
biological_process	GO:0001701	in utero embryonic development	62	205	0.302439	0.999997	4.59185e-06	1	0.01	TAB1_HUMAN	RUND1_HUMAN	SC24C_HUMAN	ARNT2_HUMAN	ACVL1_HUMAN	C2CD3_HUMAN	HEG1_HUMAN	ANGP1_HUMAN	NOTC1_HUMAN	FTM_HUMAN	FOG2_HUMAN	APBA1_HUMAN	CTNB1_HUMAN	CHD7_HUMAN	E41L5_HUMAN	APOB_HUMAN	ELL_HUMAN	NSUN2_HUMAN	DSC3_HUMAN	P53_HUMAN	PKD1_HUMAN	CHD8_HUMAN	NOS3_HUMAN	SIN3A_HUMAN	NPAT_HUMAN	STIL_HUMAN	SC24D_HUMAN	MYH6_HUMAN	TERF2_HUMAN	XRCC2_HUMAN	ZN335_HUMAN	ZFAN5_HUMAN	ZMIZ1_HUMAN	MYH9_HUMAN	PTC1_HUMAN	ZN568_HUMAN	KDIS_HUMAN	OCRL_HUMAN	RBBP6_HUMAN	ATF2_HUMAN
biological_process	GO:0050896	response to stimulus	17	83	0.204819	0.999996	4.46074e-06	1	0.01	HMCN2_HUMAN	LRIT3_HUMAN	BBS10_HUMAN	BFSP2_HUMAN	PCARE_HUMAN	USH2A_HUMAN	RPGR1_HUMAN	RIMS1_HUMAN	RPGR_HUMAN	LCTL_HUMAN	PTHB1_HUMAN	MYO3A_HUMAN	MYO3B_HUMAN	A4QPE4_HUMAN	A0A087WYQ1_HUMAN	A0A087WUZ3_HUMAN	C9JY79_HUMAN
biological_process	GO:0006950	response to stress	0	9	0	0.999996	4.79925e-06	1	0.01
biological_process	GO:0017148	negative regulation of translation	19	74	0.256757	0.999998	5.28253e-06	1	0.011	TIA1_HUMAN	PATL2_HUMAN	LS14A_HUMAN	LARP1_HUMAN	DDX6_HUMAN	CAPR1_HUMAN	CAPR2_HUMAN	DHX36_HUMAN	GRB7_HUMAN	GGYF2_HUMAN	WT1_HUMAN	XRN1_HUMAN	TSC1_HUMAN	IF2B2_HUMAN	CNO11_HUMAN	CNOT1_HUMAN	G3V153_HUMAN	H3BM22_HUMAN	F5H142_HUMAN
biological_process	GO:0048813	dendrite morphogenesis	12	35	0.342857	0.999998	5.47745e-06	1	0.011	MAP6_HUMAN	ELAV4_HUMAN	CTNA2_HUMAN	RFOX2_HUMAN	RERE_HUMAN	PICAL_HUMAN	KDIS_HUMAN	CELR2_HUMAN	ABI1_HUMAN	MEF2A_HUMAN	DSCAM_HUMAN	FARP1_HUMAN
biological_process	GO:0061014	positive regulation of mRNA catabolic process	7	15	0.466667	0.999998	5.87988e-06	1	0.013	RENT1_HUMAN	FUBP2_HUMAN	PNPT1_HUMAN	ZC12A_HUMAN	ZCCHV_HUMAN	RC3H1_HUMAN	CNOT1_HUMAN
biological_process	GO:0045738	negative regulation of DNA repair	0	1	0	0.999999	5.70291e-06	1	0.013
biological_process	GO:0007411	axon guidance	74	263	0.281369	0.999997	6.06468e-06	1	0.014	LAMA3_HUMAN	PLXA3_HUMAN	SEM4A_HUMAN	ROBO3_HUMAN	ROBO2_HUMAN	SEM4G_HUMAN	LGI1_HUMAN	KALRN_HUMAN	KIF5C_HUMAN	KIF5A_HUMAN	KINH_HUMAN	DCC_HUMAN	NFASC_HUMAN	EPHB1_HUMAN	LAMA1_HUMAN	NOTC1_HUMAN	ETV1_HUMAN	CNTN1_HUMAN	CNTN5_HUMAN	EXT1_HUMAN	PAX6_HUMAN	LAMA5_HUMAN	NCHL1_HUMAN	NRP2_HUMAN	ARHGP_HUMAN	NECT1_HUMAN	ROBO4_HUMAN	OTX2_HUMAN	SEM4D_HUMAN	TRIO_HUMAN	TENR_HUMAN	TNR16_HUMAN	TTC8_HUMAN	RYK_HUMAN	SEM3B_HUMAN	SEM6C_HUMAN	PTPRO_HUMAN	RELN_HUMAN	TEN2_HUMAN	UBP33_HUMAN
biological_process	GO:0051321	meiotic cell cycle	31	96	0.322917	0.999997	5.92052e-06	1	0.014	SMC1B_HUMAN	SMC1A_HUMAN	CTIP_HUMAN	FBX43_HUMAN	EXO1_HUMAN	MCMD2_HUMAN	NUMA1_HUMAN	MEIOS_HUMAN	SIR2_HUMAN	SYCP3_HUMAN	S26A8_HUMAN	SMC3_HUMAN	UT14C_HUMAN	XRCC2_HUMAN	YTDC2_HUMAN	ZN318_HUMAN	ZFP42_HUMAN	SUN2_HUMAN	RAD54_HUMAN	CCNB3_HUMAN	HORM1_HUMAN	NBN_HUMAN	GCP4_HUMAN	GCP6_HUMAN	G8JLP4_HUMAN	J3QSH7_HUMAN	G8JLG1_HUMAN	I6L8A6_HUMAN	A0A6Q8PHC3_HUMAN	F8W7U8_HUMAN	A0A0C4DG07_HUMAN
biological_process	GO:0051302	regulation of cell division	4	27	0.148148	0.999997	6.03616e-06	1	0.014	ZZZ3_HUMAN	YETS2_HUMAN	KAT2A_HUMAN	NALP5_HUMAN
biological_process	GO:0051225	spindle assembly	15	68	0.220588	0.999997	6.89393e-06	1	0.016	KASH5_HUMAN	NCOR1_HUMAN	HAUS4_HUMAN	HAUS5_HUMAN	INO80_HUMAN	HAUS3_HUMAN	GOG8B_HUMAN	STAR9_HUMAN	GOGA2_HUMAN	CEP63_HUMAN	GCP4_HUMAN	GCP6_HUMAN	A0A5F9ZHQ7_HUMAN	G3V2T6_HUMAN	G3V541_HUMAN
biological_process	GO:0048568	embryonic organ development	13	36	0.361111	0.999996	6.56849e-06	1	0.016	PBX1_HUMAN	FOG2_HUMAN	ARID2_HUMAN	P53_HUMAN	PBX2_HUMAN	PALB2_HUMAN	PBX3_HUMAN	PTC1_HUMAN	RBBP6_HUMAN	DPOE1_HUMAN	ERCC3_HUMAN	A0A2R8YGX0_HUMAN	A0A7I2V4X9_HUMAN
biological_process	GO:0110053	regulation of actin filament organization	1	3	0.333333	0.999996	6.59567e-06	1	0.016	PK3CA_HUMAN
biological_process	GO:0045739	positive regulation of DNA repair	13	54	0.240741	0.999997	7.22927e-06	1	0.024	ERPG3_HUMAN	BRCA1_HUMAN	ERCC6_HUMAN	DHX9_HUMAN	EYA1_HUMAN	INO80_HUMAN	NPAS2_HUMAN	SMHD1_HUMAN	RNF8_HUMAN	UIMC1_HUMAN	ARP8_HUMAN	EYA4_HUMAN	EYA3_HUMAN
biological_process	GO:0051656	establishment of organelle localization	2	3	0.666667	0.999995	7.80029e-06	1	0.026	KHDC3_HUMAN	NALP5_HUMAN
biological_process	GO:0097485	neuron projection guidance	1	5	0.2	0.999996	7.94145e-06	1	0.026	PLXA3_HUMAN
biological_process	GO:0007166	cell surface receptor signaling pathway	84	399	0.210526	0.999993	8.32804e-06	1	0.027	PECA1_HUMAN	SIGL9_HUMAN	MAGI1_HUMAN	I27RA_HUMAN	FCG2A_HUMAN	IGSF2_HUMAN	LAG3_HUMAN	LIRB2_HUMAN	CABIN_HUMAN	LAMA1_HUMAN	FCRL3_HUMAN	CD8A_HUMAN	MADD_HUMAN	AGRG4_HUMAN	AGRA1_HUMAN	AGRB1_HUMAN	GP157_HUMAN	EVL_HUMAN	KLRD1_HUMAN	KLRF1_HUMAN	BRD8_HUMAN	FCRL4_HUMAN	FCRL1_HUMAN	IP3KB_HUMAN	NUP62_HUMAN	TVB23_HUMAN	TVB64_HUMAN	PTPRC_HUMAN	TR10B_HUMAN	TVB31_HUMAN	LIRB3_HUMAN	RANB9_HUMAN	AGRF2_HUMAN	AGRL1_HUMAN	AGRB3_HUMAN	IFNG_HUMAN	BAG1_HUMAN	AGRG1_HUMAN	CLC1A_HUMAN	DTX1_HUMAN
biological_process	GO:0001568	blood vessel development	11	42	0.261905	0.999994	8.32002e-06	1	0.027	M3K3_HUMAN	PAX6_HUMAN	MEF2C_HUMAN	MDM2_HUMAN	TF7L2_HUMAN	TREX1_HUMAN	CEAM1_HUMAN	MIB1_HUMAN	DLX3_HUMAN	CO1A2_HUMAN	A0A0A0MQS9_HUMAN
biological_process	GO:0048592	eye morphogenesis	2	4	0.5	0.999996	8.35827e-06	1	0.027	NIPBL_HUMAN	CO5A2_HUMAN
biological_process	GO:1901879	regulation of protein depolymerization	0	1	0	0.999996	8.4183e-06	1	0.027
biological_process	GO:0070646	protein modification by small protein removal	0	3	0	0.999995	8.54016e-06	1	0.028
biological_process	GO:0061400	positive regulation of transcription from RNA polymerase II promoter in response to calcium ion	9	11	0.818182	1	9.11382e-06	1	0.031	CARTF_HUMAN	F8WDW1_HUMAN	F6SXV3_HUMAN	C9JZI6_HUMAN	A0A1B0GX63_HUMAN	C9JT99_HUMAN	C9JBK9_HUMAN	F8WC01_HUMAN	C9JCD6_HUMAN
biological_process	GO:0097198	histone H3-K36 trimethylation	7	8	0.875	1	9.11382e-06	1	0.031	SETD5_HUMAN	SETD2_HUMAN	PRDM9_HUMAN	H7BXT4_HUMAN	A0A1W2PPX9_HUMAN	C9JG86_HUMAN	H7C3H4_HUMAN
biological_process	GO:0045596	negative regulation of cell differentiation	28	49	0.571429	0.999994	9.45096e-06	1	0.032	PRAM5_HUMAN	PRA22_HUMAN	PRA18_HUMAN	PRA13_HUMAN	PRAM2_HUMAN	PRAM4_HUMAN	PRA11_HUMAN	SKIL_HUMAN	PRAM8_HUMAN	PRA27_HUMAN	PRA10_HUMAN	PRA12_HUMAN	PRA17_HUMAN	PRAM7_HUMAN	PRAME_HUMAN	PRA14_HUMAN	SUH_HUMAN	PRAM1_HUMAN	PRAM6_HUMAN	PRA33_HUMAN	PRA19_HUMAN	PRA25_HUMAN	ANM5_HUMAN	A0A0G2JP20_HUMAN	A0A0G2JN56_HUMAN	A0A1B0GU46_HUMAN	A0A096LNW4_HUMAN	A0A140TA27_HUMAN
biological_process	GO:0042770	signal transduction in response to DNA damage	4	10	0.4	0.999995	9.7346e-06	1	0.032	ATAD5_HUMAN	CHK2_HUMAN	CEP63_HUMAN	ABL1_HUMAN
biological_process	GO:0032879	regulation of localization	2	2	1	0.999992	9.41725e-06	1	0.032	NALP5_HUMAN	C9JIG9_HUMAN
biological_process	GO:0032535	regulation of cellular component size	0	1	0	0.999994	9.69988e-06	1	0.032
biological_process	GO:2000780	negative regulation of double-strand break repair	3	6	0.5	0.999998	9.75429e-06	1	0.035	RN169_HUMAN	TRIPC_HUMAN	UBR5_HUMAN
biological_process	GO:0002009	morphogenesis of an epithelium	6	20	0.3	0.999993	1.13325e-05	1	0.036	K1C16_HUMAN	FREM2_HUMAN	K1C12_HUMAN	TBX4_HUMAN	TIM_HUMAN	TBX5_HUMAN
biological_process	GO:0035904	aorta development	12	24	0.5	0.999997	1.17877e-05	1	0.038	PDE2A_HUMAN	PLXD1_HUMAN	TAB1_HUMAN	ROBO2_HUMAN	LRP2_HUMAN	CNTRL_HUMAN	PRIC1_HUMAN	EGR2_HUMAN	PRDM1_HUMAN	PKD2_HUMAN	ROBO1_HUMAN	AP2B1_HUMAN
biological_process	GO:0001944	vasculature development	3	18	0.166667	0.999992	1.21117e-05	1	0.038	PK3CA_HUMAN	ZFAN5_HUMAN	UN13D_HUMAN
biological_process	GO:0002520	immune system development	2	4	0.5	0.999991	1.23154e-05	1	0.038	RO60_HUMAN	CAC1C_HUMAN
biological_process	GO:0010002	cardioblast differentiation	2	3	0.666667	0.999998	1.23884e-05	1	0.039	EOMES_HUMAN	TGFB2_HUMAN
biological_process	GO:0065008	regulation of biological quality	5	19	0.263158	0.99999	1.25125e-05	1	0.04	J3KN53_HUMAN	B3KWA8_HUMAN	E7EPE2_HUMAN	G3XA89_HUMAN	A0A0A0MSC1_HUMAN
biological_process	GO:0006260	DNA replication	55	212	0.259434	0.999991	1.37139e-05	1	0.042	TICRR_HUMAN	SLX4_HUMAN	RENT1_HUMAN	GRDN_HUMAN	DNA2_HUMAN	DBF4A_HUMAN	HELB_HUMAN	ORC3_HUMAN	CHK1_HUMAN	CTF18_HUMAN	ATR_HUMAN	DHX9_HUMAN	KAT7_HUMAN	NFIA_HUMAN	CAF1B_HUMAN	SIN3A_HUMAN	RMI1_HUMAN	REPI1_HUMAN	RECQ4_HUMAN	POLH_HUMAN	WRN_HUMAN	RECQ5_HUMAN	SMBP2_HUMAN	RFC3_HUMAN	TREX1_HUMAN	RBBP6_HUMAN	RFA2_HUMAN	DPOE1_HUMAN	DPOLA_HUMAN	DPOLL_HUMAN	DONS_HUMAN	DTL_HUMAN	DCC1_HUMAN	DPOD2_HUMAN	A0A1B0GVT8_HUMAN	B1AKN8_HUMAN	A0A590UJP1_HUMAN	Q5JQP2_HUMAN	C9JHC7_HUMAN	Q5JQP3_HUMAN
biological_process	GO:0015074	DNA integration	13	22	0.590909	0.999998	1.49628e-05	1	0.042	POK8_HUMAN	POK11_HUMAN	PO113_HUMAN	POK25_HUMAN	SCND3_HUMAN	POK7_HUMAN	NYNRI_HUMAN	POK6_HUMAN	POK18_HUMAN	POK10_HUMAN	POK19_HUMAN	A0A140T9Y6_HUMAN	A0A2R8Y5N3_HUMAN
biological_process	GO:0016310	phosphorylation	9	47	0.191489	0.999989	1.42515e-05	1	0.042	PK3CA_HUMAN	ALK_HUMAN	LIMK2_HUMAN	SIN1_HUMAN	PI4KA_HUMAN	PK3CG_HUMAN	NADK_HUMAN	SHPK_HUMAN	XYLB_HUMAN
biological_process	GO:0044770	cell cycle phase transition	3	6	0.5	0.99999	1.51994e-05	1	0.042	RENT1_HUMAN	PTPRC_HUMAN	TIM_HUMAN
biological_process	GO:0060429	epithelium development	1	6	0.166667	0.999989	1.47359e-05	1	0.042	CHD7_HUMAN
biological_process	GO:0031331	positive regulation of cellular catabolic process	0	3	0	0.999991	1.46955e-05	1	0.042
biological_process	GO:0001578	microtubule bundle formation	14	40	0.35	0.999993	1.54357e-05	1	0.044	MAP1B_HUMAN	CCSE2_HUMAN	KI20A_HUMAN	FES_HUMAN	CK5P2_HUMAN	CCD66_HUMAN	GA2L2_HUMAN	NUMA1_HUMAN	NCKP5_HUMAN	PRC1_HUMAN	PSRC1_HUMAN	NAV1_HUMAN	CLAP1_HUMAN	CLIP1_HUMAN
biological_process	GO:0070507	regulation of microtubule cytoskeleton organization	12	45	0.266667	0.999992	1.60419e-05	1	0.045	MPDZ_HUMAN	MAP6_HUMAN	CEP70_HUMAN	DIXC1_HUMAN	INADL_HUMAN	ROCK1_HUMAN	TRI36_HUMAN	CLAP1_HUMAN	BICD1_HUMAN	B7Z2D2_HUMAN	C9J710_HUMAN	C9J966_HUMAN
biological_process	GO:0006261	DNA-dependent DNA replication	12	35	0.342857	0.999992	1.55555e-05	1	0.045	PNKP_HUMAN	RFC1_HUMAN	RFC3_HUMAN	REV3L_HUMAN	WDHD1_HUMAN	DPOD3_HUMAN	DPOE1_HUMAN	DPOG1_HUMAN	DPOLQ_HUMAN	DPOD2_HUMAN	CDKA1_HUMAN	A0A087WWF6_HUMAN
biological_process	GO:0051649	establishment of localization in cell	2	8	0.25	0.999987	1.555e-05	1	0.045	ZWINT_HUMAN	DYH5_HUMAN
biological_process	GO:0051261	protein depolymerization	0	1	0	0.999992	1.56452e-05	1	0.045
biological_process	GO:0033044	regulation of chromosome organization	3	19	0.157895	0.99999	1.71432e-05	1	0.049	INO80_HUMAN	NFRKB_HUMAN	ARP8_HUMAN
biological_process	GO:2000144	positive regulation of DNA-templated transcription, initiation	3	7	0.428571	0.999995	1.78324e-05	1	0.051	BCLF1_HUMAN	MITF_HUMAN	SETX_HUMAN
biological_process	GO:0019827	stem cell population maintenance	17	56	0.303571	0.999992	1.88249e-05	1	0.053	RTF1_HUMAN	SMC1A_HUMAN	MED14_HUMAN	DDX6_HUMAN	EOMES_HUMAN	MED15_HUMAN	CTNB1_HUMAN	PAF1_HUMAN	NIPBL_HUMAN	RIF1_HUMAN	SMC3_HUMAN	SALL4_HUMAN	TET1_HUMAN	TRIM8_HUMAN	TUT4_HUMAN	NANOG_HUMAN	MED12_HUMAN
biological_process	GO:0045911	positive regulation of DNA recombination	1	1	1	0.999994	1.98853e-05	1	0.054	ZCPW1_HUMAN
biological_process	GO:0006999	nuclear pore organization	6	8	0.75	0.999998	2.10841e-05	1	0.061	NU205_HUMAN	NUP98_HUMAN	TPR_HUMAN	NUP54_HUMAN	NU133_HUMAN	NDC1_HUMAN
biological_process	GO:0003341	cilium movement	23	60	0.383333	0.999988	2.17642e-05	1	0.062	DYH1_HUMAN	CP100_HUMAN	CF206_HUMAN	DYH7_HUMAN	DNAI4_HUMAN	HYDIN_HUMAN	DNAI1_HUMAN	CFA70_HUMAN	RSH6A_HUMAN	ODAD3_HUMAN	CELR2_HUMAN	DYH9_HUMAN	DNHD1_HUMAN	DYH17_HUMAN	DYH5_HUMAN	DYH11_HUMAN	CCD40_HUMAN	CF251_HUMAN	CFA61_HUMAN	J3QQK8_HUMAN	M0QWZ6_HUMAN	E7EP17_HUMAN	K7EN59_HUMAN
biological_process	GO:0030705	cytoskeleton-dependent intracellular transport	12	44	0.272727	0.999988	2.17642e-05	1	0.062	GRDN_HUMAN	MAP6_HUMAN	KIF5C_HUMAN	KIF5A_HUMAN	KINH_HUMAN	DAPLE_HUMAN	CC88B_HUMAN	HOOK3_HUMAN	A0A2R8YG73_HUMAN	A0A2R8Y4W8_HUMAN	A0A2U3TZV9_HUMAN	A0A2R8Y4X4_HUMAN
biological_process	GO:0051568	histone H3-K4 methylation	9	25	0.36	0.999993	2.25828e-05	1	0.063	SET1B_HUMAN	KMT2D_HUMAN	PAXI1_HUMAN	KMT2A_HUMAN	MEN1_HUMAN	PRDM9_HUMAN	KDM6A_HUMAN	CXXC1_HUMAN	E5RFH5_HUMAN
biological_process	GO:0010824	regulation of centrosome duplication	5	21	0.238095	0.999994	2.2848e-05	1	0.063	CHM4C_HUMAN	CP131_HUMAN	PKHD1_HUMAN	XPO1_HUMAN	CHM2B_HUMAN
biological_process	GO:0061912	selective autophagy	1	2	0.5	0.999992	2.28409e-05	1	0.063	SQSTM_HUMAN
biological_process	GO:0060560	developmental growth involved in morphogenesis	1	3	0.333333	0.999987	2.46667e-05	1	0.064	EXT1_HUMAN
biological_process	GO:0016571	histone methylation	3	24	0.125	0.999987	2.59293e-05	1	0.067	NSD1_HUMAN	NSD3_HUMAN	EHMT2_HUMAN
biological_process	GO:0050803	regulation of synapse structure or activity	2	6	0.333333	0.999987	2.57195e-05	1	0.067	SYGP1_HUMAN	A4_HUMAN
biological_process	GO:0099173	postsynapse organization	3	6	0.5	0.999988	2.69789e-05	1	0.07	RHG39_HUMAN	SPTN2_HUMAN	CNKR2_HUMAN
biological_process	GO:0016050	vesicle organization	2	13	0.153846	0.999984	2.74498e-05	1	0.071	EPS15_HUMAN	FBP1L_HUMAN
biological_process	GO:0031056	regulation of histone modification	0	4	0	0.999986	2.82803e-05	1	0.078
biological_process	GO:0030334	regulation of cell migration	44	128	0.34375	0.999979	2.95637e-05	1	0.079	LAMA3_HUMAN	PLXA3_HUMAN	PLXA4_HUMAN	PLXB1_HUMAN	PLXB2_HUMAN	PLXB3_HUMAN	PLXD1_HUMAN	SLK_HUMAN	TTBK2_HUMAN	LMNA_HUMAN	LDB2_HUMAN	MACF1_HUMAN	KIF14_HUMAN	LAMA1_HUMAN	HACE1_HUMAN	AMOL1_HUMAN	DDX58_HUMAN	PAX6_HUMAN	LAMA4_HUMAN	LAMA5_HUMAN	PKHG3_HUMAN	LDB1_HUMAN	ROBO4_HUMAN	SRCN1_HUMAN	TENR_HUMAN	ROCK1_HUMAN	U17L2_HUMAN	CEAM1_HUMAN	MYSM1_HUMAN	GSX2_HUMAN	KIF2A_HUMAN	DOC10_HUMAN	AMOL2_HUMAN	AMOT_HUMAN	A0A0A6YYF2_HUMAN	A0A590UJ70_HUMAN	A0A087X165_HUMAN	A0A0A0MSA0_HUMAN	K7EIP4_HUMAN	A0A087WVV7_HUMAN
biological_process	GO:0007059	chromosome segregation	17	93	0.182796	0.99998	3.23445e-05	1	0.095	SPAG5_HUMAN	MMS19_HUMAN	ABRX2_HUMAN	INCE_HUMAN	CK5P2_HUMAN	CDCA2_HUMAN	BRCA1_HUMAN	CENPF_HUMAN	DLGP5_HUMAN	CEP85_HUMAN	NUMA1_HUMAN	SRPK1_HUMAN	USP9X_HUMAN	UBP44_HUMAN	CENPE_HUMAN	CENPT_HUMAN	H0YM11_HUMAN
biological_process	GO:0018022	peptidyl-lysine methylation	1	9	0.111111	0.999985	3.11745e-05	1	0.095	EFMT3_HUMAN
biological_process	GO:0060379	cardiac muscle cell myoblast differentiation	1	3	0.333333	0.999998	3.04574e-05	1	0.095	NRG1_HUMAN
biological_process	GO:0009895	negative regulation of catabolic process	0	1	0	0.999982	3.11304e-05	1	0.095
biological_process	GO:0032231	regulation of actin filament bundle assembly	0	2	0	0.999987	3.25268e-05	1	0.096
biological_process	GO:2001034	positive regulation of double-strand break repair via nonhomologous end joining	11	17	0.647059	0.999996	3.29593e-05	1	0.102	SHLD2_HUMAN	KDM4D_HUMAN	FUMH_HUMAN	PNKP_HUMAN	SMHD1_HUMAN	RIF1_HUMAN	PARP3_HUMAN	PRKDC_HUMAN	SHLD1_HUMAN	PARP9_HUMAN	DTX3L_HUMAN
biological_process	GO:0030010	establishment of cell polarity	9	34	0.264706	0.999985	3.38922e-05	1	0.103	SDCG8_HUMAN	EPHB1_HUMAN	PKD1_HUMAN	PARD3_HUMAN	NEK3_HUMAN	KI26B_HUMAN	KIBRA_HUMAN	ARHGB_HUMAN	ALPK2_HUMAN
biological_process	GO:0060840	artery development	3	8	0.375	0.999986	3.58585e-05	1	0.105	LUZP1_HUMAN	ACVL1_HUMAN	GLI3_HUMAN
biological_process	GO:0050807	regulation of synapse organization	5	20	0.25	0.999981	3.78063e-05	1	0.107	SLIK4_HUMAN	NEDD4_HUMAN	SLIK2_HUMAN	PTPRO_HUMAN	TUTLA_HUMAN
biological_process	GO:0043149	stress fiber assembly	4	16	0.25	0.999983	4.07458e-05	1	0.127	SRBS1_HUMAN	F1711_HUMAN	SRF_HUMAN	ZYX_HUMAN
biological_process	GO:0001889	liver development	32	82	0.390244	0.999981	4.14622e-05	1	0.136	PHF2_HUMAN	PK3CA_HUMAN	SP3_HUMAN	JARD2_HUMAN	HGF_HUMAN	MPRI_HUMAN	COBL_HUMAN	NOTC1_HUMAN	FTM_HUMAN	MED1_HUMAN	CTRO_HUMAN	PKD1_HUMAN	NF1_HUMAN	PKD2_HUMAN	TGBR3_HUMAN	XBP1_HUMAN	ONEC2_HUMAN	RBCC1_HUMAN	ATF2_HUMAN	HNF1A_HUMAN	GLU2B_HUMAN	MA2A1_HUMAN	H0YND5_HUMAN	A0A0A0MTK8_HUMAN	F5H0K0_HUMAN	U3KQS6_HUMAN	A0A087WXS2_HUMAN	A0A087WZC2_HUMAN	E0YMJ8_HUMAN	K7ELL7_HUMAN	A0A0A0MQU7_HUMAN	A0A0C4DGS8_HUMAN
biological_process	GO:0051693	actin filament capping	14	23	0.608696	0.999984	4.16184e-05	1	0.136	SPTN1_HUMAN	SPTN2_HUMAN	SPTN4_HUMAN	SPTN5_HUMAN	SPTB1_HUMAN	SCIN_HUMAN	SPTB2_HUMAN	A0A0D9SF54_HUMAN	A0A0D9SGF6_HUMAN	M0QZQ3_HUMAN	A4QPE4_HUMAN	A0A087WYQ1_HUMAN	A0A087WUZ3_HUMAN	C9JY79_HUMAN
biological_process	GO:0070192	chromosome organization involved in meiotic cell cycle	2	5	0.4	0.999984	4.16184e-05	1	0.136	MEIOC_HUMAN	RAD50_HUMAN
biological_process	GO:0019884	antigen processing and presentation of exogenous antigen	0	7	0	0.999981	4.19083e-05	1	0.137
biological_process	GO:0006606	protein import into nucleus	42	148	0.283784	0.999978	4.24089e-05	1	0.142	NPAP1_HUMAN	P12L2_HUMAN	RBP17_HUMAN	LMNA_HUMAN	DSRAD_HUMAN	FA53A_HUMAN	IPO8_HUMAN	IPO11_HUMAN	NU214_HUMAN	NOTC1_HUMAN	HEAT3_HUMAN	MED1_HUMAN	PRIC1_HUMAN	NUP93_HUMAN	PML_HUMAN	HIKES_HUMAN	P121C_HUMAN	NUP85_HUMAN	P53_HUMAN	P85A_HUMAN	NUP62_HUMAN	NUP98_HUMAN	STK4_HUMAN	SQSTM_HUMAN	P121B_HUMAN	TXNIP_HUMAN	SPN1_HUMAN	NU107_HUMAN	TPR_HUMAN	P121A_HUMAN	TSC2_HUMAN	DP13B_HUMAN	ATF2_HUMAN	NU133_HUMAN	NU153_HUMAN	NU188_HUMAN	CIKS_HUMAN	H3BQR0_HUMAN	K7ELC3_HUMAN	H3BTA6_HUMAN
biological_process	GO:0051492	regulation of stress fiber assembly	13	25	0.52	0.999982	4.5741e-05	1	0.143	PE2R4_HUMAN	ROCK2_HUMAN	BBS4_HUMAN	SYNPO_HUMAN	MKKS_HUMAN	TTC8_HUMAN	ROCK1_HUMAN	TSC1_HUMAN	ALMS1_HUMAN	A0A087WV20_HUMAN	A0A494C1N9_HUMAN	H7C1D9_HUMAN	A0A087WTU9_HUMAN
biological_process	GO:0060976	coronary vasculature development	11	25	0.44	0.999988	4.43198e-05	1	0.143	PLXD1_HUMAN	TAB1_HUMAN	CNTRL_HUMAN	DYHC2_HUMAN	MEGF8_HUMAN	PRIC1_HUMAN	PRDM1_HUMAN	ZBT14_HUMAN	VEGFB_HUMAN	AP2B1_HUMAN	A0A494BZW6_HUMAN
biological_process	GO:0000723	telomere maintenance	29	81	0.358025	0.999977	4.66441e-05	1	0.147	MRE11_HUMAN	RTEL1_HUMAN	DNA2_HUMAN	DCR1B_HUMAN	ATR_HUMAN	INO80_HUMAN	RIF1_HUMAN	PARP3_HUMAN	RECQ4_HUMAN	PRKDC_HUMAN	SP100_HUMAN	TERF1_HUMAN	WRN_HUMAN	TE2IP_HUMAN	TERF2_HUMAN	RAD50_HUMAN	RFA2_HUMAN	ARP8_HUMAN	NBN_HUMAN	ATM_HUMAN	A0A1W2PQ90_HUMAN	A0A494C1B7_HUMAN	A0A7I2YQE7_HUMAN	A0A6Q8PH76_HUMAN	A0A7I2V5I6_HUMAN	E7EN38_HUMAN	A0A7I2V5T5_HUMAN	E9PIN0_HUMAN	A0A0C4DG07_HUMAN
biological_process	GO:0060294	cilium movement involved in cell motility	6	17	0.352941	0.999978	4.64457e-05	1	0.147	CFA46_HUMAN	RSH6A_HUMAN	TEKT3_HUMAN	TEKT4_HUMAN	CFA54_HUMAN	M0R2K1_HUMAN
biological_process	GO:0003256	regulation of transcription from RNA polymerase II promoter involved in myocardial precursor cell differentiation	2	3	0.666667	0.999999	4.73588e-05	1	0.16	NOTC1_HUMAN	SUH_HUMAN
biological_process	GO:0000414	regulation of histone H3-K36 methylation	1	1	1	0.999999	4.73588e-05	1	0.16	NSD1_HUMAN
biological_process	GO:0070973	protein localization to endoplasmic reticulum exit site	13	23	0.565217	0.999992	4.81304e-05	1	0.163	BAP29_HUMAN	GBF1_HUMAN	SC16B_HUMAN	SC16A_HUMAN	MIA2_HUMAN	TGO1_HUMAN	H7C5E2_HUMAN	C9JGJ9_HUMAN	F8WB99_HUMAN	C9IYK6_HUMAN	H0Y7N8_HUMAN	C9JTE9_HUMAN	B7Z2L0_HUMAN
biological_process	GO:0030326	embryonic limb morphogenesis	16	36	0.444444	0.999978	5.19015e-05	1	0.179	PBX1_HUMAN	FBN2_HUMAN	DYHC2_HUMAN	GREM1_HUMAN	MEGF8_HUMAN	MYH3_HUMAN	FBXW4_HUMAN	PBX2_HUMAN	SALL4_HUMAN	DLX5_HUMAN	TGFB2_HUMAN	PTC1_HUMAN	TBX5_HUMAN	HXD10_HUMAN	DLX6_HUMAN	A0A0A0MQU7_HUMAN
biological_process	GO:0031060	regulation of histone methylation	1	11	0.0909091	0.99998	5.35358e-05	1	0.187	NNMT_HUMAN
biological_process	GO:2000142	regulation of DNA-templated transcription, initiation	0	1	0	0.999983	5.52587e-05	1	0.191
biological_process	GO:0032272	negative regulation of protein polymerization	0	1	0	0.999973	5.79575e-05	1	0.192
biological_process	GO:0060261	positive regulation of transcription initiation from RNA polymerase II promoter	18	37	0.486486	0.999985	5.79619e-05	1	0.193	MED17_HUMAN	TAF6_HUMAN	TAF8_HUMAN	MED14_HUMAN	ERCC6_HUMAN	DHX36_HUMAN	MED1_HUMAN	PAXI1_HUMAN	MED13_HUMAN	TAF2_HUMAN	TAF4_HUMAN	TAF4B_HUMAN	SRF_HUMAN	TAF1_HUMAN	TBP_HUMAN	HNF1A_HUMAN	MED12_HUMAN	HNF1B_HUMAN
biological_process	GO:0030835	negative regulation of actin filament depolymerization	2	9	0.222222	0.999977	5.80341e-05	1	0.193	PK3CA_HUMAN	PKHH2_HUMAN
biological_process	GO:1902117	positive regulation of organelle assembly	1	1	1	0.999979	5.80343e-05	1	0.193	STX18_HUMAN
biological_process	GO:0032200	telomere organization	0	4	0	0.999969	5.99052e-05	1	0.193
biological_process	GO:0009968	negative regulation of signal transduction	17	69	0.246377	0.999953	6.2264e-05	1	0.197	RGS17_HUMAN	SHIP1_HUMAN	RGS12_HUMAN	RGS22_HUMAN	RGS6_HUMAN	BRAP_HUMAN	IBP3_HUMAN	ACVR1_HUMAN	B7Z2N1_HUMAN	A0A0A0MRA9_HUMAN	A0A087WTW9_HUMAN	A0A087X1Q5_HUMAN	J3QL70_HUMAN	A0A0J9YXY1_HUMAN	B7Z673_HUMAN	A0A7P0Z4M7_HUMAN	B7Z7N5_HUMAN
biological_process	GO:0006275	regulation of DNA replication	13	47	0.276596	0.999972	6.27974e-05	1	0.198	GRDN_HUMAN	ACVL1_HUMAN	JADE3_HUMAN	ORC3_HUMAN	ESCO1_HUMAN	INO80_HUMAN	KAT7_HUMAN	NFRKB_HUMAN	SMC3_HUMAN	RBBP6_HUMAN	ARP8_HUMAN	DCC1_HUMAN	EHMT2_HUMAN
biological_process	GO:0007266	Rho protein signal transduction	24	71	0.338028	0.999969	6.40658e-05	1	0.2	ROCK2_HUMAN	LIMK1_HUMAN	CNKR1_HUMAN	EPS8_HUMAN	PKHG5_HUMAN	TNR16_HUMAN	RHG04_HUMAN	RHG06_HUMAN	ROCK1_HUMAN	RHG05_HUMAN	CELR1_HUMAN	MYO9B_HUMAN	AGRG1_HUMAN	CO1A2_HUMAN	BORG2_HUMAN	ARHGB_HUMAN	ES8L3_HUMAN	ES8L2_HUMAN	E9PF63_HUMAN	A0A6I8PRU0_HUMAN	A0A0U1RQV4_HUMAN	Q14DU5_HUMAN	M0R300_HUMAN	M0R0P8_HUMAN
biological_process	GO:0003407	neural retina development	4	16	0.25	0.999977	6.51759e-05	1	0.203	SMRD3_HUMAN	TGFB2_HUMAN	AT2B2_HUMAN	AT2B4_HUMAN
biological_process	GO:0006611	protein export from nucleus	25	57	0.438596	0.999975	6.54162e-05	1	0.205	RBP17_HUMAN	DSRAD_HUMAN	NU214_HUMAN	EGR2_HUMAN	PKD1_HUMAN	RNB3L_HUMAN	SMUF1_HUMAN	XPO1_HUMAN	XPO7_HUMAN	XPO5_HUMAN	RANB3_HUMAN	CCHCR_HUMAN	A0A7I2V2Y6_HUMAN	A0A7I2YQX3_HUMAN	A0A7I2V2S3_HUMAN	C9JKM9_HUMAN	A0A7I2V461_HUMAN	A0A7I2V488_HUMAN	A0A7I2V4A3_HUMAN	A0A7I2V3W6_HUMAN	A0A7I2V3N0_HUMAN	A0A7I2V3P3_HUMAN	A0A7I2YQV4_HUMAN	A0A7P0Z4B7_HUMAN	A0A7I2V6B9_HUMAN
biological_process	GO:0010629	negative regulation of gene expression	65	245	0.265306	0.99995	6.80082e-05	1	0.206	PK3CA_HUMAN	RBMS3_HUMAN	SMCR8_HUMAN	TMF1_HUMAN	SH3G2_HUMAN	ROCK2_HUMAN	HIF1A_HUMAN	LRP3_HUMAN	LRP1_HUMAN	ACVL1_HUMAN	AURKA_HUMAN	DAXX_HUMAN	KCNQ1_HUMAN	NOTC1_HUMAN	BBS4_HUMAN	CHD4_HUMAN	DGKQ_HUMAN	EGLN_HUMAN	AFF2_HUMAN	CTNB1_HUMAN	CELF1_HUMAN	CR3L1_HUMAN	MRP2_HUMAN	MEF2C_HUMAN	NR1H2_HUMAN	PRDM1_HUMAN	ANXA7_HUMAN	NOS2_HUMAN	LDLR_HUMAN	MKKS_HUMAN	SHIP2_HUMAN	STOX1_HUMAN	NOE1_HUMAN	SETB1_HUMAN	TADBP_HUMAN	PRGR_HUMAN	PARP9_HUMAN	PARPT_HUMAN	ROBO1_HUMAN	TGFB2_HUMAN
biological_process	GO:0046907	intracellular transport	9	41	0.219512	0.999945	6.76834e-05	1	0.206	BBS4_HUMAN	FMN2_HUMAN	MKKS_HUMAN	J3KQ37_HUMAN	A0A286YES2_HUMAN	B7Z7F3_HUMAN	F8VYC4_HUMAN	A0A1W2PNU4_HUMAN	J3KNE0_HUMAN
biological_process	GO:0006913	nucleocytoplasmic transport	5	28	0.178571	0.999957	6.70543e-05	1	0.206	NU205_HUMAN	NUP98_HUMAN	XPO1_HUMAN	E9PR16_HUMAN	G3V198_HUMAN
biological_process	GO:1903146	regulation of autophagy of mitochondrion	8	17	0.470588	0.999983	7.25323e-05	1	0.215	HTRA2_HUMAN	HDAC6_HUMAN	HAX1_HUMAN	SRBP1_HUMAN	SRC8_HUMAN	SRBP2_HUMAN	UBP36_HUMAN	AT132_HUMAN
biological_process	GO:0008154	actin polymerization or depolymerization	24	58	0.413793	0.999951	7.69022e-05	1	0.222	SPC1L_HUMAN	SVIL_HUMAN	EVL_HUMAN	AVIL_HUMAN	SCIN_HUMAN	ABI1_HUMAN	ABI2_HUMAN	ENAH_HUMAN	A0A0C4DG21_HUMAN	A0A7D9NKC8_HUMAN	A0A0A0MQU9_HUMAN	E7EW77_HUMAN	H7C3Q7_HUMAN	H0Y6B5_HUMAN	F8WEB9_HUMAN	A0A0A0MRT6_HUMAN	H0YJN0_HUMAN	K7ENL7_HUMAN	K7EM16_HUMAN	E7EP65_HUMAN	E9PEZ7_HUMAN	G3V314_HUMAN	B6VEX4_HUMAN	F8WAL6_HUMAN
biological_process	GO:0031062	positive regulation of histone methylation	5	11	0.454545	0.999977	7.76831e-05	1	0.223	BRE1A_HUMAN	PAF1_HUMAN	PAXB1_HUMAN	TET1_HUMAN	XBP1_HUMAN
biological_process	GO:0045165	cell fate commitment	12	58	0.206897	0.999956	7.84391e-05	1	0.226	KDM6B_HUMAN	EXT1_HUMAN	PML_HUMAN	PRDM1_HUMAN	MITF_HUMAN	SOX2_HUMAN	SOX13_HUMAN	SPY2_HUMAN	TGFI1_HUMAN	WNT2_HUMAN	ONEC2_HUMAN	A0A3B3IU23_HUMAN
biological_process	GO:0051495	positive regulation of cytoskeleton organization	2	5	0.4	0.999954	7.93384e-05	1	0.227	PLXA3_HUMAN	VINEX_HUMAN
biological_process	GO:2001032	regulation of double-strand break repair via nonhomologous end joining	2	9	0.222222	0.999983	7.92152e-05	1	0.227	MRNIP_HUMAN	Q5TGB0_HUMAN
biological_process	GO:0099111	microtubule-based transport	1	2	0.5	0.999956	8.09226e-05	1	0.227	HD_HUMAN
biological_process	GO:0097061	dendritic spine organization	0	4	0	0.99997	7.99342e-05	1	0.227
biological_process	GO:0043488	regulation of mRNA stability	17	103	0.165049	0.999954	8.47465e-05	1	0.243	MAPK2_HUMAN	DHX36_HUMAN	FUBP2_HUMAN	PUM1_HUMAN	YTHD2_HUMAN	YTHD3_HUMAN	ZC3HE_HUMAN	RC3H1_HUMAN	A0A087WZT0_HUMAN	H0YJA2_HUMAN	G3V5Z7_HUMAN	G3V295_HUMAN	F5GX11_HUMAN	G3V411_HUMAN	M0QZ22_HUMAN	G3V3I1_HUMAN	G3V256_HUMAN
biological_process	GO:2001021	negative regulation of response to DNA damage stimulus	0	1	0	0.999966	8.70415e-05	1	0.249
biological_process	GO:2000042	negative regulation of double-strand break repair via homologous recombination	13	24	0.541667	0.999985	8.73285e-05	1	0.251	SHLD2_HUMAN	TP53B_HUMAN	HELB_HUMAN	FANCB_HUMAN	SMHD1_HUMAN	RIF1_HUMAN	SHLD1_HUMAN	RECQ5_HUMAN	UBQL4_HUMAN	PARI_HUMAN	RADX_HUMAN	DPOLQ_HUMAN	B4DZ31_HUMAN
biological_process	GO:0051170	import into nucleus	0	4	0	0.999953	8.85934e-05	1	0.259
biological_process	GO:0051247	positive regulation of protein metabolic process	1	10	0.1	0.999928	9.35645e-05	1	0.263	A4_HUMAN
biological_process	GO:0018023	peptidyl-lysine trimethylation	2	16	0.125	0.999968	9.57091e-05	1	0.264	SETD3_HUMAN	SETD2_HUMAN
biological_process	GO:0043087	regulation of GTPase activity	47	149	0.315436	0.999935	9.71841e-05	1	0.267	PLXA3_HUMAN	PLXA4_HUMAN	PLXB1_HUMAN	PLXB2_HUMAN	PLXB3_HUMAN	PLXD1_HUMAN	SI1L1_HUMAN	RASL3_HUMAN	FGD6_HUMAN	GRP3_HUMAN	FGD5_HUMAN	NF1_HUMAN	RHG44_HUMAN	SYGP1_HUMAN	RPGF6_HUMAN	VAV_HUMAN	RHG27_HUMAN	NTRK2_HUMAN	RHG09_HUMAN	RHG12_HUMAN	PROM2_HUMAN	OCRL_HUMAN	RBGPR_HUMAN	NGAP_HUMAN	MTMR5_HUMAN	MTMRD_HUMAN	ARHG5_HUMAN	B7ZCA0_HUMAN	A0A0G2JRG8_HUMAN	A0A0C4DGE6_HUMAN	H0Y638_HUMAN	A0A0A0MQZ2_HUMAN	A0A2R8Y6T2_HUMAN	A0A0G2JNY3_HUMAN	A0A6Q8PHP8_HUMAN	E9PNT2_HUMAN	E9PNX6_HUMAN	H0Y465_HUMAN	H0YDZ1_HUMAN	A0A087WV00_HUMAN
biological_process	GO:0050772	positive regulation of axonogenesis	14	32	0.4375	0.999964	9.76744e-05	1	0.27	PLXA3_HUMAN	PLXA4_HUMAN	PLXB1_HUMAN	PLXB2_HUMAN	PLXB3_HUMAN	PLXD1_HUMAN	TIAM2_HUMAN	ROBO2_HUMAN	MAP6_HUMAN	DIXC1_HUMAN	SKIL_HUMAN	NIN_HUMAN	ROBO1_HUMAN	NTRK2_HUMAN
biological_process	GO:0010948	negative regulation of cell cycle process	0	1	0	0.999939	9.90952e-05	1	0.274
biological_process	GO:0010506	regulation of autophagy	24	99	0.242424	0.999935	0.000106175	1	0.278	PK3C3_HUMAN	SOGA1_HUMAN	SMCR8_HUMAN	ITPR1_HUMAN	HDAC6_HUMAN	LAMP3_HUMAN	P85B_HUMAN	DEPD5_HUMAN	EP300_HUMAN	RMC1_HUMAN	ROCK1_HUMAN	WAC_HUMAN	UBP33_HUMAN	IF16_HUMAN	KEAP1_HUMAN	MTMR3_HUMAN	ATM_HUMAN	ABL1_HUMAN	DCA12_HUMAN	K7ENL9_HUMAN	A0A087WZD4_HUMAN	D6RH33_HUMAN	H0YDM2_HUMAN	X6R3R3_HUMAN
biological_process	GO:0060042	retina morphogenesis in camera-type eye	2	9	0.222222	0.999966	0.000103798	1	0.278	LRP5_HUMAN	MA2A1_HUMAN
biological_process	GO:0072073	kidney epithelium development	2	2	1	0.999949	0.000110135	1	0.285	SALL1_HUMAN	KANK2_HUMAN
biological_process	GO:0000281	mitotic cytokinesis	29	91	0.318681	0.999948	0.000113852	1	0.286	SEPT6_HUMAN	ROCK2_HUMAN	KI20A_HUMAN	KIF4B_HUMAN	INCE_HUMAN	APC_HUMAN	KIF4A_HUMAN	BBS4_HUMAN	CKAP2_HUMAN	CEP55_HUMAN	ESPL1_HUMAN	ANK3_HUMAN	KIF23_HUMAN	CTRO_HUMAN	SON_HUMAN	TALAN_HUMAN	NUSAP_HUMAN	SPTB2_HUMAN	ROCK1_HUMAN	ZFY26_HUMAN	TRI36_HUMAN	MYH10_HUMAN	ANLN_HUMAN	G3V2D8_HUMAN	H0YMD2_HUMAN	H0Y432_HUMAN	A0A7I2YQV0_HUMAN	A0A7I2V403_HUMAN	A0A7I2YQU3_HUMAN
biological_process	GO:0031401	positive regulation of protein modification process	1	7	0.142857	0.999918	0.000112146	1	0.286	ATG10_HUMAN
biological_process	GO:0022604	regulation of cell morphogenesis	8	25	0.32	0.999932	0.000115172	1	0.287	CAMP1_HUMAN	BCL9L_HUMAN	SH319_HUMAN	ZN135_HUMAN	ZMYM3_HUMAN	ZMYM4_HUMAN	ZMYM6_HUMAN	ZRAN1_HUMAN
biological_process	GO:0003231	cardiac ventricle development	4	7	0.571429	0.999948	0.000116511	1	0.289	GRB1L_HUMAN	SCN5A_HUMAN	NACA_HUMAN	MYCD_HUMAN
biological_process	GO:0014065	phosphatidylinositol 3-kinase signaling	18	44	0.409091	0.99994	0.000125953	1	0.328	PI3R5_HUMAN	PK3CA_HUMAN	PKHA1_HUMAN	KBTB2_HUMAN	P85B_HUMAN	P3C2A_HUMAN	LTK_HUMAN	NYAP2_HUMAN	P85A_HUMAN	NF1_HUMAN	NYAP1_HUMAN	SIR2_HUMAN	PK3CG_HUMAN	XBP1_HUMAN	MYO16_HUMAN	BY55_HUMAN	F8W883_HUMAN	C9JS30_HUMAN
biological_process	GO:0007224	smoothened signaling pathway	34	97	0.350515	0.999936	0.000128307	1	0.329	PK2L1_HUMAN	STK36_HUMAN	RO60_HUMAN	TT21B_HUMAN	TTBK2_HUMAN	IQUB_HUMAN	LBN_HUMAN	HIPK1_HUMAN	PAX6_HUMAN	PTC2_HUMAN	CDON_HUMAN	STIL_HUMAN	TALD3_HUMAN	TECT3_HUMAN	TECT2_HUMAN	PTC1_HUMAN	HIPK2_HUMAN	DZI1L_HUMAN	DZIP1_HUMAN	CENPJ_HUMAN	GLI1_HUMAN	GLI2_HUMAN	GLI3_HUMAN	EVC_HUMAN	A0A0C4DGE7_HUMAN	A0A2R8YGX0_HUMAN	A0A494C171_HUMAN	A0A087WYM5_HUMAN	H0YJF0_HUMAN	A0A494C058_HUMAN	A0A7I2V4X9_HUMAN	A0A494C075_HUMAN	A0A494C0M8_HUMAN	A0A494C1C3_HUMAN
biological_process	GO:0006900	vesicle budding from membrane	6	16	0.375	0.999949	0.00013064	1	0.333	CHM4C_HUMAN	CHMP7_HUMAN	AP2M1_HUMAN	CHMP6_HUMAN	PICAL_HUMAN	FBP1L_HUMAN
biological_process	GO:0003205	cardiac chamber development	0	2	0	0.999934	0.000132672	1	0.334
biological_process	GO:0060236	regulation of mitotic spindle organization	10	17	0.588235	0.999962	0.000145368	1	0.359	GPSM2_HUMAN	BORA_HUMAN	PKD1_HUMAN	NUMA1_HUMAN	TACC3_HUMAN	NUP62_HUMAN	PARP3_HUMAN	PSRC1_HUMAN	ANR53_HUMAN	DYHC1_HUMAN
biological_process	GO:0046599	regulation of centriole replication	7	12	0.583333	0.99997	0.000145811	1	0.364	CE295_HUMAN	SPICE_HUMAN	STIL_HUMAN	CENPJ_HUMAN	ALMS1_HUMAN	H0Y5L8_HUMAN	F6VUX8_HUMAN
biological_process	GO:0033962	P-body assembly	7	14	0.5	0.999975	0.000150277	1	0.373	PATL2_HUMAN	LS14A_HUMAN	DDX6_HUMAN	PATL1_HUMAN	RC3H1_HUMAN	ATX2_HUMAN	DYHC1_HUMAN
biological_process	GO:0070935	3'-UTR-mediated mRNA stabilization	10	20	0.5	0.999972	0.000151338	1	0.377	MAPK2_HUMAN	ELAV4_HUMAN	DAZ1_HUMAN	DAZ2_HUMAN	DAZL_HUMAN	TADBP_HUMAN	RBM10_HUMAN	ANGE2_HUMAN	DAZ4_HUMAN	DAZ3_HUMAN
biological_process	GO:0007099	centriole replication	14	41	0.341463	0.999947	0.000154162	1	0.381	PLK4_HUMAN	MOONR_HUMAN	CK5P2_HUMAN	CE295_HUMAN	WDR62_HUMAN	CNTRB_HUMAN	CE192_HUMAN	CENPJ_HUMAN	CEP63_HUMAN	CEP72_HUMAN	H0YAL6_HUMAN	I3L3Y0_HUMAN	J3KR82_HUMAN	J3KR84_HUMAN
biological_process	GO:0048593	camera-type eye morphogenesis	4	17	0.235294	0.999922	0.000170731	1	0.396	EPHB1_HUMAN	NF1_HUMAN	TEN3_HUMAN	GLI3_HUMAN
biological_process	GO:0046777	protein autophosphorylation	53	193	0.274611	0.999903	0.00017405	1	0.397	PEAK1_HUMAN	SLK_HUMAN	STK39_HUMAN	TNIK_HUMAN	SMG1_HUMAN	STK24_HUMAN	MAPK5_HUMAN	MAK_HUMAN	LMTK2_HUMAN	M3K12_HUMAN	MAPK2_HUMAN	M3K3_HUMAN	ALK_HUMAN	CDKL5_HUMAN	AURKA_HUMAN	FES_HUMAN	IRAK3_HUMAN	INSRR_HUMAN	INSR_HUMAN	EPHB1_HUMAN	ATR_HUMAN	NLK_HUMAN	OXSR1_HUMAN	PYR1_HUMAN	CHK2_HUMAN	RIPK1_HUMAN	SIK1_HUMAN	SIK2_HUMAN	STK4_HUMAN	STK33_HUMAN	ST17B_HUMAN	TIF1A_HUMAN	STK10_HUMAN	WNK2_HUMAN	VRK2_HUMAN	WNK3_HUMAN	TXK_HUMAN	NTRK2_HUMAN	TAF1_HUMAN	TAOK3_HUMAN
biological_process	GO:0097692	histone H3-K4 monomethylation	7	9	0.777778	0.99999	0.000178984	1	0.429	SET1A_HUMAN	SET1B_HUMAN	KMT2C_HUMAN	KMT2D_HUMAN	KMT2A_HUMAN	RLF_HUMAN	PRDM9_HUMAN
biological_process	GO:0051292	nuclear pore complex assembly	7	9	0.777778	0.99999	0.000178984	1	0.429	ELYS_HUMAN	NUP93_HUMAN	NU205_HUMAN	NUP98_HUMAN	NU107_HUMAN	NU153_HUMAN	NDC1_HUMAN
biological_process	GO:0043066	negative regulation of apoptotic process	134	543	0.246777	0.999861	0.000189598	1	0.44	MRE11_HUMAN	PAX2_HUMAN	TAF9B_HUMAN	TMF1_HUMAN	TOPRS_HUMAN	PRAM5_HUMAN	PRA22_HUMAN	LRP2_HUMAN	HGF_HUMAN	MALT1_HUMAN	DSRAD_HUMAN	AURKA_HUMAN	CDN1B_HUMAN	HIP1R_HUMAN	ANGP1_HUMAN	ANGP4_HUMAN	BCL2_HUMAN	HIPK3_HUMAN	KIF14_HUMAN	ENPL_HUMAN	FMN2_HUMAN	AREL1_HUMAN	CTNB1_HUMAN	BIRC6_HUMAN	ANGL4_HUMAN	K1C18_HUMAN	GREM1_HUMAN	ERCC5_HUMAN	MED1_HUMAN	BIRC1_HUMAN	BNIP3_HUMAN	PAX7_HUMAN	HAX1_HUMAN	ATS20_HUMAN	PRA18_HUMAN	FIGL1_HUMAN	P53_HUMAN	LTK_HUMAN	PRA13_HUMAN	P85A_HUMAN
biological_process	GO:0031116	positive regulation of microtubule polymerization	15	29	0.517241	0.999954	0.000189854	1	0.444	MAP1B_HUMAN	CDN1B_HUMAN	FES_HUMAN	CK5P2_HUMAN	NUMA1_HUMAN	SLAI1_HUMAN	SLAI2_HUMAN	TGRM1_HUMAN	NIN_HUMAN	PSRC1_HUMAN	ANR53_HUMAN	NAV3_HUMAN	AKAP9_HUMAN	CLAP1_HUMAN	CLIP1_HUMAN
biological_process	GO:0060397	growth hormone receptor signaling pathway via JAK-STAT	9	14	0.642857	0.999979	0.000193707	1	0.458	JAK3_HUMAN	STA5B_HUMAN	STA5A_HUMAN	A0A7I2V380_HUMAN	K7EIF9_HUMAN	A0A7I2YQF1_HUMAN	K7EK35_HUMAN	A0A7I2YQY3_HUMAN	C9J4I3_HUMAN
biological_process	GO:0003257	positive regulation of transcription from RNA polymerase II promoter involved in myocardial precursor cell differentiation	5	5	1	1	0.000209181	1	0.538	GREM1_HUMAN	TBXT_HUMAN	SRF_HUMAN	MYCD_HUMAN	J3KP65_HUMAN
biological_process	GO:0048754	branching morphogenesis of an epithelial tube	8	23	0.347826	0.999897	0.000209927	1	0.539	NOTC1_HUMAN	EGF_HUMAN	PKD1_HUMAN	PKHD1_HUMAN	TIM_HUMAN	HNF1B_HUMAN	GLI2_HUMAN	A0A7I2PJA1_HUMAN
biological_process	GO:0007167	enzyme linked receptor protein signaling pathway	2	7	0.285714	0.999841	0.000212419	1	0.542	LRP1_HUMAN	JAK3_HUMAN
biological_process	GO:0021987	cerebral cortex development	20	66	0.30303	0.999904	0.000214667	1	0.55	TACC1_HUMAN	TACC2_HUMAN	HIF1A_HUMAN	KIF14_HUMAN	MCPH1_HUMAN	BBS4_HUMAN	GTR1_HUMAN	BNIP3_HUMAN	CNTP2_HUMAN	NF1_HUMAN	TACC3_HUMAN	MKKS_HUMAN	SYNC_HUMAN	WDR62_HUMAN	SYF1_HUMAN	NTRK2_HUMAN	TBR1_HUMAN	TSC1_HUMAN	ASPM_HUMAN	A0A075B6G3_HUMAN
biological_process	GO:0016579	protein deubiquitination	73	303	0.240924	0.999866	0.000215472	1	0.553	JOS2_HUMAN	OTUD4_HUMAN	U17L3_HUMAN	UL17C_HUMAN	USP9X_HUMAN	UBP16_HUMAN	UBP38_HUMAN	U17LO_HUMAN	U17LB_HUMAN	U17LM_HUMAN	UBP32_HUMAN	UBP34_HUMAN	U17LF_HUMAN	U17LA_HUMAN	UBP29_HUMAN	U17L5_HUMAN	U17L7_HUMAN	U17LH_HUMAN	U17LJ_HUMAN	UBP35_HUMAN	U17LI_HUMAN	UBP19_HUMAN	UBP44_HUMAN	UBP24_HUMAN	U17L4_HUMAN	UBP42_HUMAN	U17LL_HUMAN	U17L6_HUMAN	U17LK_HUMAN	TNAP3_HUMAN	UBP6_HUMAN	UBP31_HUMAN	USP9Y_HUMAN	U17LD_HUMAN	UBP54_HUMAN	UBP33_HUMAN	UBP36_HUMAN	UBP28_HUMAN	U17L8_HUMAN	ZC12A_HUMAN
biological_process	GO:0040029	regulation of gene expression, epigenetic	5	18	0.277778	0.99991	0.000215398	1	0.553	HDAC6_HUMAN	MORC1_HUMAN	ZN335_HUMAN	AP2C_HUMAN	IF16_HUMAN
biological_process	GO:0042325	regulation of phosphorylation	5	21	0.238095	0.999833	0.000217735	1	0.554	EGLN_HUMAN	SIR2_HUMAN	RAD17_HUMAN	IKKB_HUMAN	B5MC51_HUMAN
biological_process	GO:0003279	cardiac septum development	3	10	0.3	0.999906	0.000217818	1	0.555	PLXD1_HUMAN	TAB1_HUMAN	ZBT14_HUMAN
biological_process	GO:0035108	limb morphogenesis	4	14	0.285714	0.999892	0.000223019	1	0.556	MEGF8_HUMAN	TBX4_HUMAN	PTC1_HUMAN	GLI3_HUMAN
biological_process	GO:0061351	neural precursor cell proliferation	4	14	0.285714	0.999892	0.000223019	1	0.556	EPHB1_HUMAN	ORC3_HUMAN	RPGR1_HUMAN	DREB_HUMAN
biological_process	GO:0010032	meiotic chromosome condensation	6	7	0.857143	0.999993	0.000226568	1	0.587	SMC2_HUMAN	CNDD3_HUMAN	SMC4_HUMAN	CND1_HUMAN	CNDH2_HUMAN	G3V1A9_HUMAN
biological_process	GO:0007221	positive regulation of transcription of Notch receptor target	6	7	0.857143	0.999993	0.000226568	1	0.587	NOTC1_HUMAN	SUH_HUMAN	RBM15_HUMAN	MAML1_HUMAN	MAML2_HUMAN	MAML3_HUMAN
biological_process	GO:0006211	5-methylcytosine catabolic process	6	7	0.857143	0.999993	0.000226568	1	0.587	TET1_HUMAN	TET2_HUMAN	TET3_HUMAN	E7EQS8_HUMAN	E7EPB1_HUMAN	A0A5H1ZRP3_HUMAN
biological_process	GO:1901228	positive regulation of transcription from RNA polymerase II promoter involved in heart development	1	2	0.5	0.999993	0.000226568	1	0.587	NACA_HUMAN
biological_process	GO:1903431	positive regulation of cell maturation	1	1	1	0.999993	0.000226568	1	0.587	CLC7A_HUMAN
biological_process	GO:0008283	cell population proliferation	44	162	0.271605	0.999813	0.000230464	1	0.589	USPL1_HUMAN	MRE11_HUMAN	TACC1_HUMAN	TACC2_HUMAN	TPO_HUMAN	LRP2_HUMAN	BRAT1_HUMAN	GRHL2_HUMAN	LICH_HUMAN	KANK1_HUMAN	LARP1_HUMAN	BOP1_HUMAN	FA83B_HUMAN	ATAD5_HUMAN	DUX4C_HUMAN	FA83D_HUMAN	BUB1_HUMAN	MPIP3_HUMAN	ITA2_HUMAN	MCM10_HUMAN	CNTP2_HUMAN	LTK_HUMAN	TACC3_HUMAN	NRG1_HUMAN	RHDF1_HUMAN	DLX5_HUMAN	YAP1_HUMAN	P63_HUMAN	RGRF1_HUMAN	UBP28_HUMAN	TYRO_HUMAN	Z324A_HUMAN	CSPG4_HUMAN	P_HUMAN	NBN_HUMAN	KAT2A_HUMAN	LIPE_HUMAN	KI67_HUMAN	E2F8_HUMAN	ASCC3_HUMAN
biological_process	GO:0045824	negative regulation of innate immune response	9	20	0.45	0.999914	0.000230089	1	0.589	RO52_HUMAN	IRAK3_HUMAN	CATIN_HUMAN	TRAD1_HUMAN	NLRC3_HUMAN	TNAP3_HUMAN	TREX1_HUMAN	DHX58_HUMAN	IF16_HUMAN
biological_process	GO:0021537	telencephalon development	3	17	0.176471	0.999869	0.000230012	1	0.589	SCN5A_HUMAN	RFX4_HUMAN	KAT2A_HUMAN
biological_process	GO:0035051	cardiocyte differentiation	1	2	0.5	0.99989	0.000229338	1	0.589	MYCD_HUMAN
biological_process	GO:0048514	blood vessel morphogenesis	2	21	0.0952381	0.999836	0.000232775	1	0.59	LAMA1_HUMAN	COT2_HUMAN
biological_process	GO:0051258	protein polymerization	0	19	0	0.99984	0.000237933	1	0.595
biological_process	GO:0051782	negative regulation of cell division	4	9	0.444444	0.999967	0.000238154	1	0.598	INTU_HUMAN	TXNIP_HUMAN	SUSD2_HUMAN	PTC1_HUMAN
biological_process	GO:0060997	dendritic spine morphogenesis	6	20	0.3	0.999914	0.000247644	1	0.605	SHAN1_HUMAN	EPHB1_HUMAN	HDAC6_HUMAN	DLG4_HUMAN	DOC10_HUMAN	CTND2_HUMAN
biological_process	GO:0043069	negative regulation of programmed cell death	4	14	0.285714	0.999816	0.000248387	1	0.605	PAX2_HUMAN	KANK2_HUMAN	NUP62_HUMAN	MECOM_HUMAN
biological_process	GO:0010842	retina layer formation	13	26	0.5	0.999949	0.000251844	1	0.617	TOPRS_HUMAN	HIPK1_HUMAN	IGFN1_HUMAN	FOXN4_HUMAN	SDK2_HUMAN	SDK1_HUMAN	PTPRM_HUMAN	XLRS1_HUMAN	AP2B_HUMAN	HIPK2_HUMAN	DSCAM_HUMAN	AHI1_HUMAN	E9PQ73_HUMAN
biological_process	GO:0071346	cellular response to interferon-gamma	11	97	0.113402	0.999865	0.000257049	1	0.62	IRF8_HUMAN	KINH_HUMAN	ATS13_HUMAN	CCL21_HUMAN	NOS2_HUMAN	STXB3_HUMAN	STX4_HUMAN	X3CL1_HUMAN	ZYX_HUMAN	TLR3_HUMAN	A0A0B4J1S1_HUMAN
biological_process	GO:0021915	neural tube development	10	27	0.37037	0.999867	0.000260367	1	0.628	GRHL2_HUMAN	C2CD3_HUMAN	NOTC1_HUMAN	DACT1_HUMAN	INTU_HUMAN	PKD1_HUMAN	NF1_HUMAN	STIL_HUMAN	PKD2_HUMAN	NU133_HUMAN
biological_process	GO:1902806	regulation of cell cycle G1/S phase transition	3	10	0.3	0.999867	0.000260367	1	0.628	CDN1B_HUMAN	TAF1_HUMAN	AT2B4_HUMAN
biological_process	GO:0080182	histone H3-K4 trimethylation	11	22	0.5	0.999952	0.000261709	1	0.631	SET1A_HUMAN	SET1B_HUMAN	RTF1_HUMAN	KMT2D_HUMAN	KMT2A_HUMAN	TET2_HUMAN	PRDM9_HUMAN	ZN335_HUMAN	TET3_HUMAN	NFYA_HUMAN	NFYC_HUMAN
biological_process	GO:0043489	RNA stabilization	1	4	0.25	0.999904	0.000265924	1	0.635	NAF1_HUMAN
biological_process	GO:1902373	negative regulation of mRNA catabolic process	0	3	0	0.999904	0.000265924	1	0.635
biological_process	GO:0000070	mitotic sister chromatid segregation	11	37	0.297297	0.999847	0.000269615	1	0.636	SMC1A_HUMAN	SPAG5_HUMAN	INCE_HUMAN	ESPL1_HUMAN	KNTC1_HUMAN	INO80_HUMAN	SMC4_HUMAN	NUSAP_HUMAN	SGO2_HUMAN	ZWINT_HUMAN	KIFC1_HUMAN
biological_process	GO:0050790	regulation of catalytic activity	15	61	0.245902	0.999772	0.000280989	1	0.64	RGPD3_HUMAN	TITIN_HUMAN	ERCC5_HUMAN	LTOR1_HUMAN	RNB3L_HUMAN	RGPD2_HUMAN	RGPD5_HUMAN	RN180_HUMAN	RGPD8_HUMAN	RGPD1_HUMAN	RGPD4_HUMAN	TREX1_HUMAN	RANB3_HUMAN	EI2BD_HUMAN	ES8L2_HUMAN
biological_process	GO:0071310	cellular response to organic substance	7	17	0.411765	0.99977	0.000277884	1	0.64	BCL2_HUMAN	EGR2_HUMAN	SATB2_HUMAN	TETN_HUMAN	TBX21_HUMAN	CUX2_HUMAN	ABCC8_HUMAN
biological_process	GO:0016331	morphogenesis of embryonic epithelium	3	11	0.272727	0.999859	0.000280755	1	0.64	KDF1_HUMAN	LAMA5_HUMAN	TGFI1_HUMAN
biological_process	GO:0032012	regulation of ARF protein signal transduction	26	74	0.351351	0.999888	0.000294971	1	0.645	PSD1_HUMAN	BIG3_HUMAN	GBF1_HUMAN	BIG1_HUMAN	IQEC2_HUMAN	IQEC3_HUMAN	PSD3_HUMAN	PSD4_HUMAN	ARFG1_HUMAN	A0A7I2V529_HUMAN	A0A7I2V2L5_HUMAN	A0A7I2V4K2_HUMAN	A0A7I2V452_HUMAN	A0A669KB10_HUMAN	A0A0G2JLG2_HUMAN	A0A7I2YQM2_HUMAN	A0A7I2YQ65_HUMAN	A0A6Q8PFR7_HUMAN	A0A1W2PR28_HUMAN	A0A7I2V2L4_HUMAN	A0A7P0RGV0_HUMAN	A0A7I2V514_HUMAN	E5RIF2_HUMAN	A0A7I2V3Y5_HUMAN	A0A669KBG8_HUMAN	E5RJ29_HUMAN
biological_process	GO:0060260	regulation of transcription initiation from RNA polymerase II promoter	0	2	0	0.999908	0.000294941	1	0.645
biological_process	GO:1902369	negative regulation of RNA catabolic process	0	1	0	0.999881	0.000305824	1	0.654
biological_process	GO:0090222	centrosome-templated microtubule nucleation	8	12	0.666667	0.99997	0.000315218	1	0.674	NIN_HUMAN	CE192_HUMAN	H0Y966_HUMAN	K7EPA2_HUMAN	K7ELX0_HUMAN	A0A0A0MR42_HUMAN	K7ENP4_HUMAN	C9JT09_HUMAN
biological_process	GO:0006886	intracellular protein transport	139	651	0.213518	0.999746	0.000324383	1	0.68	RIC1_HUMAN	SYTL1_HUMAN	SYTL2_HUMAN	SYTL3_HUMAN	SYTL4_HUMAN	TMED3_HUMAN	TMED6_HUMAN	RUND1_HUMAN	SC24C_HUMAN	STX17_HUMAN	STX6_HUMAN	SC31B_HUMAN	SNX15_HUMAN	SGSM2_HUMAN	SGSM3_HUMAN	AP2A2_HUMAN	KI13A_HUMAN	EXPH5_HUMAN	AP1B1_HUMAN	AP2M1_HUMAN	HDAC6_HUMAN	HERC2_HUMAN	EVI5L_HUMAN	APBA1_HUMAN	ARFP1_HUMAN	BAP29_HUMAN	EVI5_HUMAN	COPB2_HUMAN	RIMS2_HUMAN	SNX6_HUMAN	COG7_HUMAN	SYNRG_HUMAN	SC23B_HUMAN	RAB32_HUMAN	SC24B_HUMAN	SC24D_HUMAN	S23IP_HUMAN	STX18_HUMAN	SRC8_HUMAN	STX16_HUMAN
biological_process	GO:0045995	regulation of embryonic development	22	53	0.415094	0.999862	0.000327698	1	0.682	LAMA3_HUMAN	NF2L2_HUMAN	INSR_HUMAN	LAMA1_HUMAN	DHX36_HUMAN	INO80_HUMAN	LAMA4_HUMAN	LAMA5_HUMAN	NIPBL_HUMAN	TRIPC_HUMAN	ZZZ3_HUMAN	YETS2_HUMAN	ARP8_HUMAN	KAT2A_HUMAN	A0A0A6YYF2_HUMAN	A0A0A0MSA0_HUMAN	K7EIP4_HUMAN	A0A6Q8PHK0_HUMAN	A0A0A0MTC7_HUMAN	A0A3B3ITG1_HUMAN	A0A0A0MQS9_HUMAN	A0A0A0MTS5_HUMAN
biological_process	GO:0032835	glomerulus development	4	8	0.5	0.999884	0.0003248	1	0.682	BCL2_HUMAN	WWTR1_HUMAN	WT1_HUMAN	PTPRO_HUMAN
biological_process	GO:0001754	eye photoreceptor cell differentiation	1	4	0.25	0.999892	0.000332715	1	0.686	P2R3A_HUMAN
biological_process	GO:0042771	intrinsic apoptotic signaling pathway in response to DNA damage by p53 class mediator	14	31	0.451613	0.999893	0.000353451	1	0.693	SNW1_HUMAN	TOPRS_HUMAN	DDIT4_HUMAN	HIPK1_HUMAN	ATAD5_HUMAN	PML_HUMAN	BRCA2_HUMAN	EP300_HUMAN	P53_HUMAN	CHK2_HUMAN	P63_HUMAN	UBP28_HUMAN	IF16_HUMAN	HIPK2_HUMAN
biological_process	GO:0006914	autophagy	59	250	0.236	0.999741	0.00036078	1	0.698	PK3C3_HUMAN	SMCR8_HUMAN	RUBIC_HUMAN	LRSM1_HUMAN	HAP1_HUMAN	ITB4_HUMAN	IRF8_HUMAN	CHM4C_HUMAN	CHMP7_HUMAN	HDAC6_HUMAN	CHMP6_HUMAN	P53_HUMAN	ANXA7_HUMAN	SIR2_HUMAN	SP20H_HUMAN	SC16B_HUMAN	RMC1_HUMAN	SC16A_HUMAN	SQSTM_HUMAN	WIPI4_HUMAN	PTN22_HUMAN	TGFA1_HUMAN	UBQL4_HUMAN	XBP1_HUMAN	ZKSC3_HUMAN	WDFY4_HUMAN	TCPR2_HUMAN	VP13A_HUMAN	VPS11_HUMAN	RBCC1_HUMAN	ASTRA_HUMAN	AT132_HUMAN	FBP1L_HUMAN	IF16_HUMAN	MTMRD_HUMAN	CHM2B_HUMAN	AMRA1_HUMAN	ABL1_HUMAN	ATG10_HUMAN	B7Z879_HUMAN
biological_process	GO:0051174	regulation of phosphorus metabolic process	0	1	0	0.99972	0.000357591	1	0.698
biological_process	GO:0051648	vesicle localization	0	2	0	0.999804	0.000357029	1	0.698
biological_process	GO:0032922	circadian regulation of gene expression	27	77	0.350649	0.999854	0.000375506	1	0.704	PER1_HUMAN	PER2_HUMAN	PER3_HUMAN	CRY1_HUMAN	MAGD1_HUMAN	CLOCK_HUMAN	EGR1_HUMAN	PML_HUMAN	KMT2A_HUMAN	MBB1A_HUMAN	NCOA2_HUMAN	PASD1_HUMAN	NPAS2_HUMAN	NRIP1_HUMAN	TNR16_HUMAN	PRGC1_HUMAN	ZFHX3_HUMAN	UBP2_HUMAN	NR1D1_HUMAN	RAI1_HUMAN	HUWE1_HUMAN	HNF1B_HUMAN	BHE41_HUMAN	GFPT1_HUMAN	BMAL2_HUMAN	ANM5_HUMAN	A0A087WV69_HUMAN
biological_process	GO:0018107	peptidyl-threonine phosphorylation	23	70	0.328571	0.999824	0.000384825	1	0.706	STK39_HUMAN	ROCK2_HUMAN	LMTK2_HUMAN	M3K12_HUMAN	HIPK1_HUMAN	BCL2_HUMAN	HIPK3_HUMAN	CHK1_HUMAN	CTRO_HUMAN	NLK_HUMAN	OXSR1_HUMAN	PYR1_HUMAN	MRCKB_HUMAN	MRCKG_HUMAN	MRCKA_HUMAN	PRKDC_HUMAN	ROCK1_HUMAN	WNK3_HUMAN	WNK1_HUMAN	TAF1_HUMAN	ATF2_HUMAN	HIPK2_HUMAN	ACVR1_HUMAN
biological_process	GO:0045132	meiotic chromosome segregation	2	4	0.5	0.999824	0.000384825	1	0.706	SMC2_HUMAN	SMC4_HUMAN
biological_process	GO:0043414	macromolecule methylation	1	5	0.2	0.999756	0.000379307	1	0.706	A0A3B3ITW8_HUMAN
biological_process	GO:0051179	localization	21	83	0.253012	0.99965	0.000390551	1	0.707	I6L894_HUMAN	A0A5F9ZI30_HUMAN	A0A5F9ZHT4_HUMAN	A0A5F9ZHE4_HUMAN	A0A5F9ZHR8_HUMAN	A0A5F9ZGY4_HUMAN	A0A5F9ZHF7_HUMAN	A0A5F9ZI46_HUMAN	H0YBS0_HUMAN	A0A5F9ZI40_HUMAN	A0A5F9ZHD2_HUMAN	A0A5F9ZH30_HUMAN	A0A5F9ZGX3_HUMAN	A0A5F9ZH19_HUMAN	A0A5F9ZGZ5_HUMAN	A0A5F9ZHT8_HUMAN	D6RHE1_HUMAN	A0A5F9ZHN5_HUMAN	A0A5F9ZI65_HUMAN	A0A5F9ZHS1_HUMAN	A0A5F9ZGY3_HUMAN
biological_process	GO:0060548	negative regulation of cell death	10	69	0.144928	0.999705	0.00038977	1	0.707	PGBM_HUMAN	CHM4C_HUMAN	CHMP7_HUMAN	FOG2_HUMAN	CHMP6_HUMAN	BNIP3_HUMAN	NPAS2_HUMAN	TNR1B_HUMAN	NTRK3_HUMAN	CHM2B_HUMAN
biological_process	GO:0006479	protein methylation	2	25	0.08	0.999775	0.000391584	1	0.707	FA98B_HUMAN	BTG1_HUMAN
biological_process	GO:0051303	establishment of chromosome localization	0	3	0	0.999834	0.000399702	1	0.708
biological_process	GO:0090110	COPII-coated vesicle cargo loading	9	14	0.642857	0.999947	0.000405109	1	0.725	SC24C_HUMAN	SC31B_HUMAN	SC23B_HUMAN	SC24B_HUMAN	SC24D_HUMAN	SCAP_HUMAN	SC24A_HUMAN	SC31A_HUMAN	TGO1_HUMAN
biological_process	GO:0007270	neuron-neuron synaptic transmission	9	15	0.6	0.999947	0.000405109	1	0.725	DLGP2_HUMAN	A0A0J9YY16_HUMAN	A0A0J9YX70_HUMAN	A0A0J9YY63_HUMAN	A0A0G2JLW6_HUMAN	A0A1B0GTN4_HUMAN	A0A1B0GXK6_HUMAN	A0A0G2JPE0_HUMAN	H0YBY6_HUMAN
biological_process	GO:0051418	microtubule nucleation by microtubule organizing center	0	1	0	0.999947	0.000405109	1	0.725
biological_process	GO:1905168	positive regulation of double-strand break repair via homologous recombination	16	37	0.432432	0.999889	0.000415088	1	0.731	TRRAP_HUMAN	MMS19_HUMAN	CTIP_HUMAN	FUS_HUMAN	ING3_HUMAN	ERCC6_HUMAN	EP400_HUMAN	EPC1_HUMAN	ARID2_HUMAN	BRD8_HUMAN	FANCB_HUMAN	MRNIP_HUMAN	TIM_HUMAN	POGZ_HUMAN	KHDC3_HUMAN	MO4L2_HUMAN
biological_process	GO:0030902	hindbrain development	7	16	0.4375	0.99979	0.000415108	1	0.732	CTNB1_HUMAN	KDM2B_HUMAN	CE290_HUMAN	TBR1_HUMAN	HNF1B_HUMAN	GLI2_HUMAN	AHI1_HUMAN
biological_process	GO:0007254	JNK cascade	14	49	0.285714	0.999769	0.000434862	1	0.736	PE2R4_HUMAN	M3K12_HUMAN	M3K20_HUMAN	DAXX_HUMAN	ERCC6_HUMAN	GPS2_HUMAN	NPHN_HUMAN	CSN1_HUMAN	M4K2_HUMAN	TLR3_HUMAN	TNR19_HUMAN	ATF2_HUMAN	IRAK1_HUMAN	DUS9_HUMAN
biological_process	GO:0017038	protein import	0	5	0	0.999746	0.000423453	1	0.736
biological_process	GO:0030097	hemopoiesis	17	62	0.274194	0.999672	0.000439071	1	0.743	RUNX2_HUMAN	KIRR3_HUMAN	ANGP1_HUMAN	CCR2_HUMAN	BRCA2_HUMAN	SGPL1_HUMAN	SELPL_HUMAN	PARPT_HUMAN	TGFB2_HUMAN	ZN160_HUMAN	PICAL_HUMAN	ADDB_HUMAN	CDK13_HUMAN	ASXL1_HUMAN	CNN2_HUMAN	CD34_HUMAN	Q5SVY4_HUMAN
biological_process	GO:0030522	intracellular receptor signaling pathway	1	5	0.2	0.999744	0.000442142	1	0.743	DCBD2_HUMAN
biological_process	GO:0030317	flagellated sperm motility	34	106	0.320755	0.999777	0.000447021	1	0.746	TMF1_HUMAN	MCSP_HUMAN	DYH1_HUMAN	HOATZ_HUMAN	FSIP2_HUMAN	DRC7_HUMAN	CTSR1_HUMAN	CFA65_HUMAN	APOB_HUMAN	ING2_HUMAN	DNAI1_HUMAN	NPHP4_HUMAN	SL9C1_HUMAN	S26A8_HUMAN	ROP1L_HUMAN	SPEM1_HUMAN	TSSK4_HUMAN	TTLL3_HUMAN	TEKT3_HUMAN	VP13A_HUMAN	QRIC2_HUMAN	AKAP4_HUMAN	CELF3_HUMAN	DYH5_HUMAN	ADCY3_HUMAN	AT2B4_HUMAN	DYH11_HUMAN	CCD40_HUMAN	CF251_HUMAN	CFA58_HUMAN	I3L3D4_HUMAN	F5H4K1_HUMAN	J3KPT7_HUMAN	H7C4T4_HUMAN
biological_process	GO:0010332	response to gamma radiation	10	27	0.37037	0.99985	0.000445813	1	0.746	BCL2_HUMAN	FACD2_HUMAN	ERCC6_HUMAN	PML_HUMAN	BRCA2_HUMAN	P53_HUMAN	MEN1_HUMAN	PRKDC_HUMAN	XRCC2_HUMAN	PTPRC_HUMAN
biological_process	GO:0016926	protein desumoylation	10	18	0.555556	0.999929	0.000447566	1	0.756	USPL1_HUMAN	SENP2_HUMAN	SENP1_HUMAN	SENP7_HUMAN	SENP3_HUMAN	J3QRE4_HUMAN	A0A087WV50_HUMAN	A0A087X0R7_HUMAN	J3KSF5_HUMAN	J3QL36_HUMAN
biological_process	GO:0046931	pore complex assembly	4	12	0.333333	0.999918	0.00045382	1	0.76	GSDMD_HUMAN	PKHA7_HUMAN	AFAD_HUMAN	E9PKC0_HUMAN
biological_process	GO:0072583	clathrin-dependent endocytosis	17	50	0.34	0.999822	0.00046121	1	0.762	AP2A2_HUMAN	FCSD2_HUMAN	AP2M1_HUMAN	FCHO2_HUMAN	FCHO1_HUMAN	GAK_HUMAN	GP107_HUMAN	PI51C_HUMAN	SAC2_HUMAN	PICAL_HUMAN	AP2B1_HUMAN	FBP1L_HUMAN	HIP1_HUMAN	H7BXJ4_HUMAN	A0A0C3SFZ9_HUMAN	A0A0G2JS82_HUMAN	M0QZI3_HUMAN
biological_process	GO:0030834	regulation of actin filament depolymerization	0	2	0	0.999782	0.000479875	1	0.766
biological_process	GO:0051642	centrosome localization	10	19	0.526316	0.999876	0.000482118	1	0.769	SYNE2_HUMAN	KINH_HUMAN	AURKA_HUMAN	CC141_HUMAN	DLGP5_HUMAN	NIN_HUMAN	SUN1_HUMAN	SUN2_HUMAN	RBP2_HUMAN	A0A0C4DGK3_HUMAN
biological_process	GO:0048255	mRNA stabilization	8	31	0.258065	0.999831	0.000484216	1	0.771	TR150_HUMAN	LARP1_HUMAN	MEIOC_HUMAN	FUS_HUMAN	E2F1_HUMAN	PABP1_HUMAN	RBP56_HUMAN	CIKS_HUMAN
biological_process	GO:0051653	spindle localization	2	5	0.4	0.999831	0.000484216	1	0.771	KASH5_HUMAN	ASPM_HUMAN
biological_process	GO:0035082	axoneme assembly	11	24	0.458333	0.999782	0.000486626	1	0.776	HOATZ_HUMAN	CF206_HUMAN	CFA46_HUMAN	CFA74_HUMAN	JHY_HUMAN	RSH6A_HUMAN	RP1_HUMAN	TGRM1_HUMAN	RP1L1_HUMAN	TTLL3_HUMAN	CCD40_HUMAN
biological_process	GO:0001838	embryonic epithelial tube formation	1	3	0.333333	0.999759	0.000494854	1	0.778	RET_HUMAN
biological_process	GO:0106027	neuron projection organization	0	1	0	0.999787	0.000496432	1	0.78
biological_process	GO:0060173	limb development	10	35	0.285714	0.999732	0.000501481	1	0.8	SMOC1_HUMAN	SALL1_HUMAN	M3K20_HUMAN	CHD7_HUMAN	COT2_HUMAN	GREM1_HUMAN	INTU_HUMAN	KAT2B_HUMAN	RC3H2_HUMAN	KAT2A_HUMAN
biological_process	GO:0016199	axon midline choice point recognition	7	10	0.7	0.999959	0.00050136	1	0.8	ROBO3_HUMAN	ROBO2_HUMAN	ROBO1_HUMAN	A4_HUMAN	A0A087WTM1_HUMAN	A0A087WZ85_HUMAN	A0A0A0MSX4_HUMAN
biological_process	GO:0007095	mitotic G2 DNA damage checkpoint signaling	17	41	0.414634	0.999855	0.000502644	1	0.806	MRE11_HUMAN	TICRR_HUMAN	CHK1_HUMAN	BRCA1_HUMAN	FZR1_HUMAN	FOXO4_HUMAN	CLSPN_HUMAN	UIMC1_HUMAN	MRNIP_HUMAN	TAOK3_HUMAN	TAOK2_HUMAN	NBN_HUMAN	FOXN3_HUMAN	DONS_HUMAN	DTL_HUMAN	ATM_HUMAN	A0A0C4DG07_HUMAN
biological_process	GO:0072175	epithelial tube formation	1	1	1	0.999736	0.000524422	1	0.807	PODXL_HUMAN
biological_process	GO:0048588	developmental cell growth	0	2	0	0.999708	0.000513223	1	0.807
biological_process	GO:1901988	negative regulation of cell cycle phase transition	0	1	0	0.99968	0.000508334	1	0.807
biological_process	GO:0007169	transmembrane receptor protein tyrosine kinase signaling pathway	33	148	0.222973	0.999622	0.000529173	1	0.808	LMTK2_HUMAN	ALK_HUMAN	FES_HUMAN	ANGL1_HUMAN	INSRR_HUMAN	INSR_HUMAN	EPHB1_HUMAN	BCAR1_HUMAN	CNKR1_HUMAN	CLNK_HUMAN	CD8A_HUMAN	MTSS1_HUMAN	LTK_HUMAN	NRG1_HUMAN	PTPRT_HUMAN	SAM10_HUMAN	RYK_HUMAN	ROS1_HUMAN	UFO_HUMAN	NTRK3_HUMAN	NTRK2_HUMAN	RET_HUMAN	ABI1_HUMAN	CASS4_HUMAN	DOK4_HUMAN	AHI1_HUMAN	H0YM90_HUMAN	B7Z7U4_HUMAN	A0A087WZL3_HUMAN	A0A0K2YUJ3_HUMAN	A0A0D9SFP6_HUMAN	R4GMR8_HUMAN	Q5H8Y1_HUMAN
biological_process	GO:0001894	tissue homeostasis	4	20	0.2	0.999681	0.000528028	1	0.808	WWTR1_HUMAN	YAP1_HUMAN	ACACA_HUMAN	CD34_HUMAN
biological_process	GO:0051053	negative regulation of DNA metabolic process	0	1	0	0.999748	0.000525516	1	0.808
biological_process	GO:0019433	triglyceride catabolic process	9	20	0.45	0.999864	0.000554157	1	0.815	DDHD2_HUMAN	APOB_HUMAN	PLPL1_HUMAN	PLPL3_HUMAN	PLB1_HUMAN	LIPS_HUMAN	LIPE_HUMAN	CPSM_HUMAN	LIPC_HUMAN
biological_process	GO:0045786	negative regulation of cell cycle	4	57	0.0701754	0.999623	0.000557483	1	0.816	TAF6_HUMAN	HTRA2_HUMAN	MEN1_HUMAN	LIRB1_HUMAN
biological_process	GO:0099518	vesicle cytoskeletal trafficking	1	2	0.5	0.999782	0.000566665	1	0.818	CC186_HUMAN
biological_process	GO:0048534	hematopoietic or lymphoid organ development	0	4	0	0.999566	0.000574395	1	0.818
biological_process	GO:0003007	heart morphogenesis	14	42	0.333333	0.999649	0.00059627	1	0.826	TAB1_HUMAN	INSR_HUMAN	CHD7_HUMAN	ARID2_HUMAN	NIPBL_HUMAN	TBXT_HUMAN	TGFB2_HUMAN	TGBR3_HUMAN	ZMIZ1_HUMAN	TREX1_HUMAN	PTC1_HUMAN	ASXL1_HUMAN	ALPK2_HUMAN	A0A087X0R0_HUMAN
biological_process	GO:0042461	photoreceptor cell development	2	4	0.5	0.999796	0.000590936	1	0.826	RP1_HUMAN	RP1L1_HUMAN
biological_process	GO:0090114	COPII-coated vesicle budding	1	7	0.142857	0.999796	0.000590936	1	0.826	A0A2R8YFH5_HUMAN
biological_process	GO:0048638	regulation of developmental growth	1	2	0.5	0.999618	0.00060745	1	0.827	NIPBL_HUMAN
biological_process	GO:0007423	sensory organ development	1	6	0.166667	0.999543	0.000644291	1	0.832	MYO7A_HUMAN
biological_process	GO:1901652	response to peptide	0	1	0	0.999555	0.000655872	1	0.832
biological_process	GO:0010212	response to ionizing radiation	17	46	0.369565	0.999659	0.000657719	1	0.834	TICRR_HUMAN	SOSB1_HUMAN	BRAT1_HUMAN	BRCA1_HUMAN	EYA1_HUMAN	PAXI1_HUMAN	RNF8_HUMAN	UIMC1_HUMAN	MRNIP_HUMAN	RFWD3_HUMAN	UBP28_HUMAN	RAD54_HUMAN	RA54B_HUMAN	ATM_HUMAN	DCR1C_HUMAN	COP1_HUMAN	EYA3_HUMAN
biological_process	GO:0032270	positive regulation of cellular protein metabolic process	2	22	0.0909091	0.999475	0.000664705	1	0.835	NR1H2_HUMAN	IF4G1_HUMAN
biological_process	GO:0045321	leukocyte activation	34	52	0.653846	0.999475	0.000683124	1	0.839	ZNF3_HUMAN	Q5SUL5_HUMAN	A0A0G2JL56_HUMAN	O78179_HUMAN	A0A0G2JPD3_HUMAN	Q5RIP0_HUMAN	Q5QT33_HUMAN	D9J307_HUMAN	A0A1W2PRX1_HUMAN	Q2L6G2_HUMAN	D5H3J5_HUMAN	Q5SRN5_HUMAN	A0A1W2PS24_HUMAN	A0A140T913_HUMAN	A0A1W2PNZ7_HUMAN	Q5RJ27_HUMAN	Q5SPM2_HUMAN	A0A140T8Y4_HUMAN	A0A0G2JIF2_HUMAN	A0A1W2PP77_HUMAN	S6AU73_HUMAN	Q9GJ45_HUMAN	A0A140T9X5_HUMAN	Q53YP1_HUMAN	Q53Z42_HUMAN	A0A1W2PSE7_HUMAN	O19617_HUMAN	A0A1W2PQS8_HUMAN	A0A1W2PR61_HUMAN	A0A1W2PRT9_HUMAN	B0UXQ0_HUMAN	A0A140T9I0_HUMAN	A0A1W2PS56_HUMAN	Q5SS57_HUMAN
biological_process	GO:0043589	skin morphogenesis	8	13	0.615385	0.999917	0.000687191	1	0.849	ITB4_HUMAN	CDSN_HUMAN	ITA2_HUMAN	SRF_HUMAN	P63_HUMAN	CO1A2_HUMAN	G8JLG2_HUMAN	Q2L6G8_HUMAN
biological_process	GO:0042462	eye photoreceptor cell development	9	24	0.375	0.999789	0.000701015	1	0.858	PAX6_HUMAN	PRDM1_HUMAN	CE290_HUMAN	NR2E3_HUMAN	NOE3_HUMAN	MYO7A_HUMAN	G3V236_HUMAN	G3V577_HUMAN	G3V3F7_HUMAN
biological_process	GO:0007026	negative regulation of microtubule depolymerization	15	35	0.428571	0.99981	0.000701316	1	0.861	TTBK2_HUMAN	MAP1B_HUMAN	CAMP1_HUMAN	APCL_HUMAN	KTNB1_HUMAN	APC_HUMAN	HDAC6_HUMAN	CKAP2_HUMAN	GA2L2_HUMAN	NAV3_HUMAN	CLAP1_HUMAN	CLAP2_HUMAN	ATX7_HUMAN	CAMP2_HUMAN	ARHG2_HUMAN
biological_process	GO:0061842	microtubule organizing center localization	0	1	0	0.99981	0.000701316	1	0.861
biological_process	GO:1901888	regulation of cell junction assembly	3	8	0.375	0.999606	0.000705763	1	0.863	ROCK2_HUMAN	ROCK1_HUMAN	ZO1_HUMAN
biological_process	GO:0003281	ventricular septum development	15	33	0.454545	0.999718	0.000718245	1	0.864	PDE2A_HUMAN	SALL1_HUMAN	LRP2_HUMAN	LUZP1_HUMAN	HEG1_HUMAN	CNTRL_HUMAN	MATR3_HUMAN	PRDM1_HUMAN	MDM2_HUMAN	SALL4_HUMAN	XIRP2_HUMAN	TRIPB_HUMAN	TBX5_HUMAN	AP2B1_HUMAN	A0A494BZW6_HUMAN
biological_process	GO:0048015	phosphatidylinositol-mediated signaling	16	80	0.2	0.99958	0.000733276	1	0.866	PK3C3_HUMAN	PK3CA_HUMAN	PLCH2_HUMAN	P3C2A_HUMAN	GAB2_HUMAN	PITM2_HUMAN	PLCB4_HUMAN	PI4KA_HUMAN	PK3CG_HUMAN	SAC2_HUMAN	PLCB3_HUMAN	E9PDN7_HUMAN	A0A0C4DGF9_HUMAN	A0A2R8Y2F6_HUMAN	A0A1W2PS05_HUMAN	A8MYT4_HUMAN
biological_process	GO:0001708	cell fate specification	12	35	0.342857	0.999671	0.000734015	1	0.867	APCL_HUMAN	APC_HUMAN	NOTC1_HUMAN	EOMES_HUMAN	CTNB1_HUMAN	MGAP_HUMAN	TBXT_HUMAN	TBX4_HUMAN	TBX21_HUMAN	TBX15_HUMAN	TBR1_HUMAN	TBX5_HUMAN
biological_process	GO:0050773	regulation of dendrite development	5	17	0.294118	0.999671	0.000734015	1	0.867	SEZ6_HUMAN	CDKL5_HUMAN	CDC20_HUMAN	DREB_HUMAN	CAMP2_HUMAN
biological_process	GO:0060996	dendritic spine development	2	13	0.153846	0.999671	0.000734015	1	0.867	SRGP2_HUMAN	EPHB1_HUMAN
biological_process	GO:0045184	establishment of protein localization	13	41	0.317073	0.999331	0.000793813	1	0.91	PKHA1_HUMAN	KIF14_HUMAN	CEP55_HUMAN	ANK3_HUMAN	ITA2_HUMAN	MDM2_HUMAN	USH2A_HUMAN	TREX1_HUMAN	AKAP4_HUMAN	DLG4_HUMAN	DZIP1_HUMAN	ABL1_HUMAN	AGRV1_HUMAN
biological_process	GO:0002064	epithelial cell development	6	14	0.428571	0.999533	0.00079368	1	0.91	HYDIN_HUMAN	SHRM3_HUMAN	P63_HUMAN	ONEC2_HUMAN	ATL4_HUMAN	A0A2R8Y5P9_HUMAN
biological_process	GO:0140013	meiotic nuclear division	1	2	0.5	0.999539	0.000790459	1	0.91	SYCP2_HUMAN
biological_process	GO:0060041	retina development in camera-type eye	10	57	0.175439	0.999585	0.000797446	1	0.911	LAMC3_HUMAN	CHD7_HUMAN	PAX6_HUMAN	NECT1_HUMAN	NPHP4_HUMAN	RP1_HUMAN	RP1L1_HUMAN	NR2E3_HUMAN	RET_HUMAN	TTLL5_HUMAN
biological_process	GO:0016071	mRNA metabolic process	3	6	0.5	0.999363	0.000816388	1	0.912	FAKD4_HUMAN	PABP3_HUMAN	ATX2L_HUMAN
biological_process	GO:0042149	cellular response to glucose starvation	19	50	0.38	0.999705	0.000878809	1	0.919	PK3C3_HUMAN	NF2L2_HUMAN	BCL2_HUMAN	GTR1_HUMAN	CPEB4_HUMAN	MBB1A_HUMAN	P53_HUMAN	SIK1B_HUMAN	SIK1_HUMAN	SIK2_HUMAN	SESN3_HUMAN	SZT2_HUMAN	XBP1_HUMAN	ZC12A_HUMAN	BAKOR_HUMAN	NIM1_HUMAN	FOXO3_HUMAN	IF16_HUMAN	MTMR3_HUMAN
biological_process	GO:0051017	actin filament bundle assembly	12	76	0.157895	0.99951	0.000863333	1	0.919	SHRM1_HUMAN	EPS8_HUMAN	ADDB_HUMAN	BAIP2_HUMAN	F5H3Q6_HUMAN	A0A2R8YE63_HUMAN	A0A2R8Y4W2_HUMAN	F5H2B8_HUMAN	F5H0R8_HUMAN	F5GYM8_HUMAN	Q4G0X0_HUMAN	F5H1B5_HUMAN
biological_process	GO:0051569	regulation of histone H3-K4 methylation	3	9	0.333333	0.999754	0.000838868	1	0.919	NNMT_HUMAN	ZN335_HUMAN	EHMT2_HUMAN
biological_process	GO:0010256	endomembrane system organization	1	2	0.5	0.999387	0.000846821	1	0.919	BIG1_HUMAN
biological_process	GO:0048562	embryonic organ morphogenesis	0	4	0	0.999464	0.000851144	1	0.919
biological_process	GO:0150063	visual system development	0	1	0	0.999419	0.000879881	1	0.919
biological_process	GO:0031058	positive regulation of histone modification	0	1	0	0.999604	0.000851581	1	0.919
biological_process	GO:0022616	DNA strand elongation	0	1	0	0.999754	0.000838868	1	0.919
biological_process	GO:0099175	regulation of postsynapse organization	3	19	0.157895	0.999597	0.000913334	1	0.921	CDKL5_HUMAN	AB17A_HUMAN	NRP2_HUMAN
biological_process	GO:0021700	developmental maturation	1	1	1	0.999417	0.000918491	1	0.922	MAP1B_HUMAN
biological_process	GO:0001654	eye development	16	47	0.340426	0.999383	0.000934144	1	0.927	PBX1_HUMAN	SMOC1_HUMAN	HIPK1_HUMAN	MEIS2_HUMAN	FREM2_HUMAN	PAX6_HUMAN	PBX2_HUMAN	SOX2_HUMAN	TGFB2_HUMAN	XLRS1_HUMAN	PBX3_HUMAN	ATS18_HUMAN	HIPK2_HUMAN	ANHX_HUMAN	ATF6A_HUMAN	CPMD8_HUMAN
biological_process	GO:0030833	regulation of actin filament polymerization	16	98	0.163265	0.999405	0.000929058	1	0.927	PKHG2_HUMAN	HCLS1_HUMAN	FCSD2_HUMAN	FCSD1_HUMAN	ARC1B_HUMAN	HAX1_HUMAN	CYFP2_HUMAN	SRC8_HUMAN	RHG28_HUMAN	RHG18_HUMAN	RHG40_HUMAN	DREB_HUMAN	ARC1A_HUMAN	E9PF58_HUMAN	A0A1W2PNV4_HUMAN	A0A0A6YYG9_HUMAN
biological_process	GO:1902017	regulation of cilium assembly	9	36	0.25	0.999614	0.000923561	1	0.927	SYNE2_HUMAN	SDCG8_HUMAN	CDKL5_HUMAN	ATS16_HUMAN	ODFP2_HUMAN	ODAD3_HUMAN	IFT88_HUMAN	CNTRB_HUMAN	A0A0C4DGK3_HUMAN
biological_process	GO:0051168	nuclear export	3	9	0.333333	0.999439	0.000941832	1	0.927	MALT1_HUMAN	ATX1_HUMAN	AKP13_HUMAN
biological_process	GO:0002263	cell activation involved in immune response	1	1	1	0.999417	0.000937744	1	0.927	GBF1_HUMAN
biological_process	GO:0030041	actin filament polymerization	12	59	0.20339	0.999368	0.00096699	1	0.931	LMOD2_HUMAN	COBL_HUMAN	HCLS1_HUMAN	DIAP3_HUMAN	GAS7_HUMAN	SRC8_HUMAN	RHG06_HUMAN	WASF3_HUMAN	CORO7_HUMAN	MILK2_HUMAN	ABL1_HUMAN	A0A0A6YYG9_HUMAN
biological_process	GO:0035019	somatic stem cell population maintenance	12	32	0.375	0.999699	0.000962663	1	0.931	LRP5_HUMAN	LDB2_HUMAN	KLF10_HUMAN	LDB1_HUMAN	SOX2_HUMAN	SUH_HUMAN	ZHX2_HUMAN	PO5F1_HUMAN	YAP1_HUMAN	RAF1_HUMAN	NANOG_HUMAN	BCL9_HUMAN
biological_process	GO:0009725	response to hormone	8	40	0.2	0.999287	0.000952452	1	0.931	MMS19_HUMAN	HCLS1_HUMAN	ANGL3_HUMAN	NCOA6_HUMAN	NOS2_HUMAN	NOS3_HUMAN	SRF_HUMAN	RBM14_HUMAN
biological_process	GO:0051293	establishment of spindle localization	2	6	0.333333	0.999667	0.000949164	1	0.931	NALP5_HUMAN	DYHC1_HUMAN
biological_process	GO:0048639	positive regulation of developmental growth	1	4	0.25	0.99948	0.000971283	1	0.931	INSR_HUMAN
biological_process	GO:0001841	neural tube formation	2	7	0.285714	0.999528	0.000989925	1	0.933	STK4_HUMAN	MIB1_HUMAN
biological_process	GO:0016573	histone acetylation	17	42	0.404762	0.999429	0.00101479	1	0.935	P20L1_HUMAN	TRRAP_HUMAN	KAT6A_HUMAN	ING3_HUMAN	EPC1_HUMAN	BRD8_HUMAN	EP300_HUMAN	TAF5L_HUMAN	KAT2A_HUMAN	KAT6B_HUMAN	MO4L2_HUMAN	CBPA4_HUMAN	CBP_HUMAN	A0A590UJN0_HUMAN	H0Y4W2_HUMAN	F2Z2U4_HUMAN	A0A0A0MQU7_HUMAN
biological_process	GO:0007346	regulation of mitotic cell cycle	7	53	0.132075	0.999293	0.00100876	1	0.935	GBF1_HUMAN	DLGP5_HUMAN	SIK1_HUMAN	ZN268_HUMAN	PTC1_HUMAN	TTC28_HUMAN	ASAH2_HUMAN
biological_process	GO:0001763	morphogenesis of a branching structure	3	9	0.333333	0.999412	0.00103275	1	0.935	PRDM1_HUMAN	SETD2_HUMAN	ERMIN_HUMAN
biological_process	GO:0035023	regulation of Rho protein signal transduction	23	44	0.522727	0.999513	0.0010442	1	0.936	KANK1_HUMAN	ARG28_HUMAN	ARHGI_HUMAN	EPS8_HUMAN	BCR_HUMAN	KANK2_HUMAN	ARHGP_HUMAN	RGRF2_HUMAN	RGRF1_HUMAN	RAF1_HUMAN	MYO9B_HUMAN	AKP13_HUMAN	ARHG2_HUMAN	ES8L3_HUMAN	ES8L2_HUMAN	A0A087WZG4_HUMAN	A8MYJ1_HUMAN	A0A087WX73_HUMAN	H0YMW2_HUMAN	D6RAS9_HUMAN	A0A087WY36_HUMAN	E9PIH7_HUMAN	A0A087WTD7_HUMAN
biological_process	GO:0061061	muscle structure development	2	11	0.181818	0.999231	0.00105903	1	0.937	PDLI5_HUMAN	HXA2_HUMAN
biological_process	GO:0010033	response to organic substance	2	26	0.0769231	0.999089	0.00106265	1	0.937	CREB1_HUMAN	XRCC1_HUMAN
biological_process	GO:0061419	positive regulation of transcription from RNA polymerase II promoter in response to hypoxia	5	6	0.833333	0.999962	0.00106302	1	0.954	NF2L2_HUMAN	HIF1A_HUMAN	NOTC1_HUMAN	P53_HUMAN	SUH_HUMAN
biological_process	GO:0036003	positive regulation of transcription from RNA polymerase II promoter in response to stress	5	8	0.625	0.999748	0.00108216	1	0.957	NF2L2_HUMAN	MUC1_HUMAN	P53_HUMAN	NF2L1_HUMAN	GCN1_HUMAN
biological_process	GO:0000422	autophagy of mitochondrion	9	44	0.204545	0.999504	0.00110876	1	0.958	FUND2_HUMAN	BNIP3_HUMAN	SQSTM_HUMAN	WIPI4_HUMAN	RBCC1_HUMAN	ATG2A_HUMAN	ATG2B_HUMAN	ATG9B_HUMAN	AMRA1_HUMAN
biological_process	GO:1990138	neuron projection extension	4	21	0.190476	0.999395	0.00109961	1	0.958	PLXA3_HUMAN	AURKA_HUMAN	CTNB1_HUMAN	E2AK4_HUMAN
biological_process	GO:0031113	regulation of microtubule polymerization	6	12	0.5	0.999556	0.00111366	1	0.96	CAMP1_HUMAN	S39AC_HUMAN	PRUN1_HUMAN	CLAP2_HUMAN	ABL1_HUMAN	CAMP2_HUMAN
biological_process	GO:0032092	positive regulation of protein binding	26	71	0.366197	0.999508	0.00113388	1	0.961	PLXD1_HUMAN	RO52_HUMAN	RIPK2_HUMAN	LRP1_HUMAN	MARK3_HUMAN	HIP1R_HUMAN	DACT1_HUMAN	CAPR2_HUMAN	E41L5_HUMAN	EP300_HUMAN	PKD1_HUMAN	MEN1_HUMAN	NMD3_HUMAN	STK4_HUMAN	STING_HUMAN	PIN1_HUMAN	TF7L2_HUMAN	TAF1_HUMAN	UBP33_HUMAN	ACE_HUMAN	ADDB_HUMAN	AMFR_HUMAN	HIPK2_HUMAN	DTX3L_HUMAN	A4_HUMAN	CSF3_HUMAN
biological_process	GO:0031333	negative regulation of protein-containing complex assembly	5	37	0.135135	0.999343	0.00111932	1	0.961	HDAC6_HUMAN	EP300_HUMAN	TFP11_HUMAN	TMC8_HUMAN	RAF1_HUMAN
biological_process	GO:0031860	telomeric 3' overhang formation	4	4	1	1	0.001139	1	0.98	MRE11_HUMAN	DCR1B_HUMAN	RAD50_HUMAN	NBN_HUMAN
biological_process	GO:0070433	negative regulation of nucleotide-binding oligomerization domain containing 2 signaling pathway	4	4	1	1	0.001139	1	0.98	ERBIN_HUMAN	PTN22_HUMAN	TNAP3_HUMAN	A0A0B4J1S7_HUMAN
biological_process	GO:0021942	radial glia guided migration of Purkinje cell	4	4	1	1	0.001139	1	0.98	CTNA2_HUMAN	RFOX2_HUMAN	RERE_HUMAN	DAB1_HUMAN
biological_process	GO:0046340	diacylglycerol catabolic process	4	4	1	1	0.001139	1	0.98	APOA2_HUMAN	PLB1_HUMAN	DGLA_HUMAN	LIPS_HUMAN
biological_process	GO:0050902	leukocyte adhesive activation	4	4	1	1	0.001139	1	0.98	SELPL_HUMAN	X3CL1_HUMAN	J3QRA1_HUMAN	H3BSR6_HUMAN
biological_process	GO:1901187	regulation of ephrin receptor signaling pathway	3	3	1	1	0.001139	1	0.98	ANS1A_HUMAN	A0A3B3ITU5_HUMAN	A0A3B3ISP1_HUMAN
biological_process	GO:0000416	positive regulation of histone H3-K36 methylation	1	1	1	1	0.001139	1	0.98	PAXI1_HUMAN
biological_process	GO:1903008	organelle disassembly	0	4	0	0.999416	0.00114838	1	0.98
biological_process	GO:0021543	pallium development	0	1	0	0.999365	0.00115761	1	0.98
biological_process	GO:0035522	monoubiquitinated histone H2A deubiquitination	14	33	0.424242	0.999676	0.00118467	1	0.985	TAF6L_HUMAN	TAF6_HUMAN	TRRAP_HUMAN	SP20H_HUMAN	TAF2_HUMAN	TAF5L_HUMAN	TAF4_HUMAN	UBP16_HUMAN	ASXL1_HUMAN	MYSM1_HUMAN	KAT2A_HUMAN	BAP1_HUMAN	ATX7_HUMAN	A0A590UJD8_HUMAN
biological_process	GO:0035521	monoubiquitinated histone deubiquitination	9	25	0.36	0.999676	0.00118467	1	0.985	TAF6L_HUMAN	TAF6_HUMAN	TRRAP_HUMAN	SP20H_HUMAN	TAF2_HUMAN	TAF5L_HUMAN	TAF4_HUMAN	KAT2A_HUMAN	ATX7_HUMAN
biological_process	GO:0046548	retinal rod cell development	7	11	0.636364	0.999875	0.00115933	1	0.985	TOPRS_HUMAN	FTM_HUMAN	BBS4_HUMAN	ANAG_HUMAN	RP1_HUMAN	RPGR1_HUMAN	NTRK2_HUMAN
biological_process	GO:0031396	regulation of protein ubiquitination	4	19	0.210526	0.999316	0.00117921	1	0.985	DAXX_HUMAN	MTBP_HUMAN	DCNL1_HUMAN	UBQL1_HUMAN
biological_process	GO:0035148	tube formation	2	9	0.222222	0.99937	0.00117311	1	0.985	SDCG8_HUMAN	NOTC1_HUMAN
biological_process	GO:0060537	muscle tissue development	0	5	0	0.999194	0.00120888	1	0.985
biological_process	GO:0060541	respiratory system development	0	4	0	0.99933	0.00116831	1	0.985
biological_process	GO:0007416	synapse assembly	18	74	0.243243	0.999256	0.0013048	1	0.986	PLXD1_HUMAN	MAP1B_HUMAN	KIRR3_HUMAN	IGFN1_HUMAN	PCDB5_HUMAN	SDK2_HUMAN	PCDBG_HUMAN	SPTN2_HUMAN	NRG1_HUMAN	SDK1_HUMAN	RYK_HUMAN	PCDBD_HUMAN	ADDB_HUMAN	AGRF1_HUMAN	DSCAM_HUMAN	AGRL3_HUMAN	FARP1_HUMAN	E9PE96_HUMAN
biological_process	GO:0097150	neuronal stem cell population maintenance	11	23	0.478261	0.999738	0.00121171	1	0.986	PCM1_HUMAN	SRRT_HUMAN	FANCC_HUMAN	FACD2_HUMAN	MCPH1_HUMAN	NOTC1_HUMAN	SSXT_HUMAN	SOX2_HUMAN	ASPM_HUMAN	FOXO3_HUMAN	HOOK3_HUMAN
biological_process	GO:0046328	regulation of JNK cascade	6	16	0.375	0.999362	0.00122569	1	0.986	MDFIC_HUMAN	JIP1_HUMAN	EPHB1_HUMAN	ULK4_HUMAN	PHLP1_HUMAN	M4K4_HUMAN
biological_process	GO:0044818	mitotic G2/M transition checkpoint	2	8	0.25	0.999554	0.00123679	1	0.986	SOSB1_HUMAN	CHK1_HUMAN
biological_process	GO:0007044	cell-substrate junction assembly	2	4	0.5	0.999391	0.00133954	1	0.986	TLN1_HUMAN	FINC_HUMAN
biological_process	GO:0061005	cell differentiation involved in kidney development	2	3	0.666667	0.999516	0.00129613	1	0.986	PTC1_HUMAN	GLI3_HUMAN
biological_process	GO:0051650	establishment of vesicle localization	1	7	0.142857	0.999314	0.00121597	1	0.986	LIMK2_HUMAN
biological_process	GO:0048017	inositol lipid-mediated signaling	0	5	0	0.999216	0.00133075	1	0.986
biological_process	GO:0000819	sister chromatid segregation	0	3	0	0.999191	0.00129317	1	0.986
biological_process	GO:0061572	actin filament bundle organization	0	2	0	0.999279	0.00124739	1	0.986
biological_process	GO:0046631	alpha-beta T cell activation	0	1	0	0.999335	0.00121824	1	0.986
biological_process	GO:0003222	ventricular trabecula myocardium morphogenesis	8	14	0.571429	0.999806	0.00134517	1	0.99	HEG1_HUMAN	NOTC1_HUMAN	EGLN_HUMAN	CHD7_HUMAN	MED1_HUMAN	NRG1_HUMAN	TGFB2_HUMAN	SUH_HUMAN
biological_process	GO:0090656	t-circle formation	6	11	0.545455	0.999806	0.00134517	1	0.99	SLX4_HUMAN	DNA2_HUMAN	EXO1_HUMAN	TERF1_HUMAN	WRN_HUMAN	NBN_HUMAN
biological_process	GO:0006271	DNA strand elongation involved in DNA replication	5	8	0.625	0.999762	0.00137886	1	0.99	MCM3_HUMAN	RFC3_HUMAN	DPOD3_HUMAN	DPOLA_HUMAN	DPOD2_HUMAN
biological_process	GO:2000269	regulation of fibroblast apoptotic process	2	3	0.666667	0.999762	0.00137886	1	0.99	P53_HUMAN	XRCC2_HUMAN
biological_process	GO:0031453	positive regulation of heterochromatin assembly	2	2	1	0.999806	0.00134517	1	0.99	SIN3A_HUMAN	TPR_HUMAN
biological_process	GO:0006971	hypotonic response	1	2	0.5	0.999762	0.00137886	1	0.99	ITA2_HUMAN
biological_process	GO:0090737	telomere maintenance via telomere trimming	1	2	0.5	0.999806	0.00134517	1	0.99	NBN_HUMAN
biological_process	GO:0043162	ubiquitin-dependent protein catabolic process via the multivesicular body sorting pathway	12	32	0.375	0.999585	0.00139814	1	0.991	MB12B_HUMAN	CHM4C_HUMAN	CHMP7_HUMAN	HDAC6_HUMAN	CHMP6_HUMAN	NEDD4_HUMAN	RN115_HUMAN	UBAP1_HUMAN	UBA1L_HUMAN	VP37A_HUMAN	CHM2B_HUMAN	A0A0D9SG79_HUMAN
biological_process	GO:0042221	response to chemical	1	3	0.333333	0.998778	0.00139451	1	0.991	A0A669KB12_HUMAN
biological_process	GO:0010976	positive regulation of neuron projection development	31	120	0.258333	0.999237	0.0014164	1	0.992	PLXB2_HUMAN	PLXB3_HUMAN	NF2L2_HUMAN	LRRC7_HUMAN	FES_HUMAN	KTNB1_HUMAN	FIG4_HUMAN	ITA3_HUMAN	CNTN1_HUMAN	AVIL_HUMAN	EP300_HUMAN	LTK_HUMAN	SETX_HUMAN	TOX_HUMAN	RETR3_HUMAN	TWF1_HUMAN	RELN_HUMAN	X3CL1_HUMAN	NTRK3_HUMAN	NTRK2_HUMAN	RET_HUMAN	TEN3_HUMAN	Z804A_HUMAN	KDIS_HUMAN	NEUS_HUMAN	ANR27_HUMAN	DMD_HUMAN	ADNP_HUMAN	A0A075B6G3_HUMAN	F8VVU1_HUMAN	K7EQI9_HUMAN
biological_process	GO:0001843	neural tube closure	29	85	0.341176	0.999266	0.00157123	1	0.992	PLXB2_HUMAN	PAX2_HUMAN	LRP2_HUMAN	GRHL2_HUMAN	COBL_HUMAN	BBS4_HUMAN	C1TC_HUMAN	FZD3_HUMAN	PRIC1_HUMAN	SC24B_HUMAN	STIL_HUMAN	SETD2_HUMAN	ST14_HUMAN	SHRM3_HUMAN	SALL4_HUMAN	TGFB2_HUMAN	RGMA_HUMAN	PTC1_HUMAN	TSC1_HUMAN	TSC2_HUMAN	CELR1_HUMAN	MED12_HUMAN	KI20B_HUMAN	KAT2A_HUMAN	ABL1_HUMAN	A0A2R8Y5P9_HUMAN	A0A0R4J2E1_HUMAN	A0A087X0R0_HUMAN	J3KP65_HUMAN
biological_process	GO:0016236	macroautophagy	18	81	0.222222	0.999039	0.00147277	1	0.992	PK3C3_HUMAN	HGS_HUMAN	CHM4C_HUMAN	CHMP6_HUMAN	ILRUN_HUMAN	UBQL1_HUMAN	STAM1_HUMAN	SQSTM_HUMAN	MTMRE_HUMAN	VP37A_HUMAN	VPS36_HUMAN	VTA1_HUMAN	BAKOR_HUMAN	NBR1_HUMAN	MTMR3_HUMAN	CHM2B_HUMAN	ATG10_HUMAN	B7Z5R6_HUMAN
biological_process	GO:0031397	negative regulation of protein ubiquitination	15	51	0.294118	0.999404	0.0014035	1	0.992	PER2_HUMAN	SENP2_HUMAN	CRY1_HUMAN	GTPB4_HUMAN	AGRB1_HUMAN	CAMLG_HUMAN	MNAR1_HUMAN	SQSTM_HUMAN	UBXN1_HUMAN	SPY2_HUMAN	U2AF2_HUMAN	TNAP3_HUMAN	UFL1_HUMAN	N4BP1_HUMAN	ISG15_HUMAN
biological_process	GO:0018394	peptidyl-lysine acetylation	3	6	0.5	0.999075	0.00158076	1	0.992	ESCO1_HUMAN	KAT2B_HUMAN	EP300_HUMAN
biological_process	GO:0030832	regulation of actin filament length	2	2	1	0.999004	0.00150951	1	0.992	NEBU_HUMAN	EPS8_HUMAN
biological_process	GO:0050777	negative regulation of immune response	1	14	0.0714286	0.999171	0.00140943	1	0.992	SHIP1_HUMAN
biological_process	GO:0048880	sensory system development	0	3	0	0.999015	0.0014635	1	0.992
biological_process	GO:0046464	acylglycerol catabolic process	0	5	0	0.999497	0.00158362	1	0.992
biological_process	GO:0031109	microtubule polymerization or depolymerization	0	1	0	0.999132	0.0015381	1	0.992
biological_process	GO:0031122	cytoplasmic microtubule organization	18	58	0.310345	0.999282	0.00173034	1	0.993	PCM1_HUMAN	SLK_HUMAN	GRDN_HUMAN	MAP10_HUMAN	CAMP1_HUMAN	DAPLE_HUMAN	CE126_HUMAN	CLIP2_HUMAN	CC88B_HUMAN	SLAI1_HUMAN	SLAI2_HUMAN	HOOK3_HUMAN	DYST_HUMAN	GCP4_HUMAN	GCP6_HUMAN	CAMP2_HUMAN	DYHC1_HUMAN	CLIP1_HUMAN
biological_process	GO:0016241	regulation of macroautophagy	12	55	0.218182	0.998981	0.00186051	1	0.993	PK3C3_HUMAN	VATG1_HUMAN	VATG2_HUMAN	VATH_HUMAN	HDAC6_HUMAN	MTMR8_HUMAN	SNX6_HUMAN	UBQL1_HUMAN	NEDD4_HUMAN	UBQL2_HUMAN	BAKOR_HUMAN	AT132_HUMAN
biological_process	GO:0007281	germ cell development	12	38	0.315789	0.998849	0.0017648	1	0.993	TIAR_HUMAN	FANCC_HUMAN	DMRTB_HUMAN	ANGP2_HUMAN	CELF1_HUMAN	DAZL_HUMAN	PRDM1_HUMAN	WT1_HUMAN	ACVR1_HUMAN	DZIP1_HUMAN	B2CL1_HUMAN	E7EV40_HUMAN
biological_process	GO:0051571	positive regulation of histone H3-K4 methylation	10	25	0.4	0.999596	0.00162449	1	0.993	RTF1_HUMAN	SNW1_HUMAN	BRCA1_HUMAN	CTNB1_HUMAN	PAXI1_HUMAN	KMT2A_HUMAN	MYB_HUMAN	HCFC1_HUMAN	AUTS2_HUMAN	KANL3_HUMAN
biological_process	GO:0000423	mitophagy	7	15	0.466667	0.999518	0.00167646	1	0.993	LRBA_HUMAN	RETR1_HUMAN	SQSTM_HUMAN	BAKOR_HUMAN	ATG13_HUMAN	AMRA1_HUMAN	ARFP2_HUMAN
biological_process	GO:0031571	mitotic G1 DNA damage checkpoint signaling	7	15	0.466667	0.999518	0.00167646	1	0.993	GGYF2_HUMAN	P53_HUMAN	PRKDC_HUMAN	WAC_HUMAN	TREX1_HUMAN	RFWD3_HUMAN	RFA2_HUMAN
biological_process	GO:0007019	microtubule depolymerization	5	15	0.333333	0.999409	0.0015956	1	0.993	KTNB1_HUMAN	NCKP5_HUMAN	KIF24_HUMAN	KIF2A_HUMAN	KIF2C_HUMAN
biological_process	GO:0051963	regulation of synapse assembly	4	9	0.444444	0.999129	0.00181713	1	0.993	PDLI5_HUMAN	SETD5_HUMAN	MEF2C_HUMAN	NECT1_HUMAN
biological_process	GO:0048193	Golgi vesicle transport	4	36	0.111111	0.998712	0.00182734	1	0.993	STX6_HUMAN	GOGA4_HUMAN	GOGA5_HUMAN	F5GZH9_HUMAN
biological_process	GO:0050770	regulation of axonogenesis	2	20	0.1	0.998981	0.00186051	1	0.993	SI1L1_HUMAN	RET_HUMAN
biological_process	GO:0045143	homologous chromosome segregation	2	8	0.25	0.999256	0.00172082	1	0.993	ESPL1_HUMAN	SGO2_HUMAN
biological_process	GO:0010970	transport along microtubule	2	2	1	0.998929	0.00186414	1	0.993	DC1I2_HUMAN	DC1I1_HUMAN
biological_process	GO:0043254	regulation of protein-containing complex assembly	2	21	0.0952381	0.998776	0.00168776	1	0.993	BBS10_HUMAN	HCFC1_HUMAN
biological_process	GO:1902692	regulation of neuroblast proliferation	0	4	0	0.999518	0.00167646	1	0.993
biological_process	GO:0032880	regulation of protein localization	19	83	0.228916	0.998548	0.00189691	1	0.995	RO52_HUMAN	TRI25_HUMAN	STX6_HUMAN	BCL2_HUMAN	ITB3_HUMAN	BORA_HUMAN	SIX4_HUMAN	PKHM2_HUMAN	TTC8_HUMAN	TPR_HUMAN	TRI14_HUMAN	PTC1_HUMAN	UFL1_HUMAN	PICAL_HUMAN	AAK1_HUMAN	CELR2_HUMAN	KHDC3_HUMAN	DZI1L_HUMAN	AFAD_HUMAN
biological_process	GO:0002052	positive regulation of neuroblast proliferation	11	24	0.458333	0.999564	0.00186801	1	0.995	HIF1A_HUMAN	NOTC1_HUMAN	CTNB1_HUMAN	FZD3_HUMAN	PAX6_HUMAN	SMRD3_HUMAN	WDR62_HUMAN	ZN335_HUMAN	X3CL1_HUMAN	ASPM_HUMAN	GLI3_HUMAN
biological_process	GO:0001779	natural killer cell differentiation	7	15	0.466667	0.999564	0.00186801	1	0.995	PBX1_HUMAN	SP3_HUMAN	KAT7_HUMAN	STA5B_HUMAN	TOX_HUMAN	PTPRC_HUMAN	UFO_HUMAN
biological_process	GO:0030516	regulation of axon extension	6	18	0.333333	0.999112	0.001874	1	0.995	SIN3A_HUMAN	SRC8_HUMAN	NOE1_HUMAN	BARH2_HUMAN	CLAP2_HUMAN	ABL1_HUMAN
biological_process	GO:0150115	cell-substrate junction organization	0	1	0	0.999112	0.001874	1	0.995
biological_process	GO:0061326	renal tubule development	1	2	0.5	0.999098	0.0019282	1	0.996	TTC8_HUMAN
biological_process	GO:0015031	protein transport	144	783	0.183908	0.998344	0.0019487	1	0.998	SENP2_HUMAN	S15A5_HUMAN	TOM1_HUMAN	RRBP1_HUMAN	LRP2_HUMAN	LMAN1_HUMAN	LYST_HUMAN	MB12B_HUMAN	KI20A_HUMAN	ANK2_HUMAN	CHM4C_HUMAN	ELYS_HUMAN	FCSD2_HUMAN	CHMP7_HUMAN	BBS4_HUMAN	COG2_HUMAN	DEN2A_HUMAN	ENPL_HUMAN	EXOC3_HUMAN	FMN2_HUMAN	APBA2_HUMAN	DJC13_HUMAN	CHMP6_HUMAN	CENPF_HUMAN	COPE_HUMAN	AP5M1_HUMAN	GBF1_HUMAN	GANP_HUMAN	EHBP1_HUMAN	BIG1_HUMAN	P85B_HUMAN	HIKES_HUMAN	PO210_HUMAN	NU205_HUMAN	EPS15_HUMAN	LCA5_HUMAN	PITM1_HUMAN	CE290_HUMAN	KTN1_HUMAN	MX2_HUMAN
biological_process	GO:0043966	histone H3 acetylation	20	67	0.298507	0.999079	0.00202475	1	0.998	PER1_HUMAN	TAF6L_HUMAN	TAF6_HUMAN	TRRAP_HUMAN	KAT6A_HUMAN	JADE3_HUMAN	KAT2B_HUMAN	KAT7_HUMAN	BRCA2_HUMAN	TAF2_HUMAN	TAF5L_HUMAN	TAF4_HUMAN	ZZZ3_HUMAN	YETS2_HUMAN	KAT2A_HUMAN	KAT6B_HUMAN	ATX7_HUMAN	A0A3F2YNX6_HUMAN	A0A3B3IS53_HUMAN	A0A3B3ITI3_HUMAN
biological_process	GO:0044458	motile cilium assembly	8	26	0.307692	0.999225	0.00203903	1	0.998	ATMIN_HUMAN	INTU_HUMAN	JHY_HUMAN	RSH6A_HUMAN	AKAP4_HUMAN	CENPJ_HUMAN	DMD_HUMAN	CCD40_HUMAN
biological_process	GO:0000379	tRNA-type intron splice site recognition and cleavage	6	9	0.666667	0.999821	0.00193462	1	0.998	SEN34_HUMAN	A0A0G2JNL0_HUMAN	A0A0G2JNK5_HUMAN	A0A590UJW4_HUMAN	B0V3J0_HUMAN	E7EQB3_HUMAN
biological_process	GO:0000301	retrograde transport, vesicle recycling within Golgi	6	9	0.666667	0.999821	0.00193462	1	0.998	COG2_HUMAN	GOGA5_HUMAN	COG7_HUMAN	COG1_HUMAN	COG5_HUMAN	COG6_HUMAN
biological_process	GO:0032495	response to muramyl dipeptide	5	12	0.416667	0.999546	0.00210733	1	0.998	NLRP1_HUMAN	ERBIN_HUMAN	NOTC1_HUMAN	NOD2_HUMAN	TNAP3_HUMAN
biological_process	GO:0034341	response to interferon-gamma	4	27	0.148148	0.998753	0.00210951	1	0.998	RO52_HUMAN	SP100_HUMAN	DNJA3_HUMAN	C2TA_HUMAN
biological_process	GO:0018393	internal peptidyl-lysine acetylation	4	7	0.571429	0.998765	0.00211082	1	0.998	KAT2B_HUMAN	KAT7_HUMAN	EP300_HUMAN	KAT2A_HUMAN
biological_process	GO:0032201	telomere maintenance via semi-conservative replication	3	5	0.6	0.999821	0.00193462	1	0.998	RENT1_HUMAN	DNA2_HUMAN	WRN_HUMAN
biological_process	GO:0000022	mitotic spindle elongation	2	2	1	0.999821	0.00193462	1	0.998	KIF23_HUMAN	PRC1_HUMAN
biological_process	GO:0008064	regulation of actin polymerization or depolymerization	1	7	0.142857	0.998617	0.00207404	1	0.998	CTRO_HUMAN
biological_process	GO:0070076	histone lysine demethylation	1	3	0.333333	0.999446	0.0020005	1	0.998	B3KV94_HUMAN
biological_process	GO:0016445	somatic diversification of immunoglobulins	0	2	0	0.999116	0.00213587	1	0.999
biological_process	GO:0006915	apoptotic process	142	766	0.185379	0.994102	0.00686355	1	1	PDCD7_HUMAN	RBM5_HUMAN	RASF5_HUMAN	TAF6_HUMAN	TRAIP_HUMAN	TIA1_HUMAN	TIAR_HUMAN	RT30_HUMAN	RTN3_HUMAN	NLRP1_HUMAN	SLK_HUMAN	SH3K1_HUMAN	RIPK2_HUMAN	RMD3_HUMAN	BRAT1_HUMAN	DDIT4_HUMAN	BUB1B_HUMAN	HIP1R_HUMAN	ECSCR_HUMAN	DCC_HUMAN	BCL2_HUMAN	DDIAS_HUMAN	HIPK3_HUMAN	HIF3A_HUMAN	CKAP2_HUMAN	NCF1_HUMAN	CHK1_HUMAN	B2L13_HUMAN	AREL1_HUMAN	APBB1_HUMAN	BIRC6_HUMAN	BAP29_HUMAN	BCLF1_HUMAN	DUX4_HUMAN	ESPL1_HUMAN	GREM1_HUMAN	CH3L1_HUMAN	BNIP3_HUMAN	BUB1_HUMAN	MEF2C_HUMAN
biological_process	GO:0045087	innate immune response	127	668	0.19012	0.860784	0.156642	1	1	PJA2_HUMAN	RO52_HUMAN	TRI48_HUMAN	TRIM4_HUMAN	TRI25_HUMAN	TR49D_HUMAN	TRBC1_HUMAN	TRBC2_HUMAN	RIPK2_HUMAN	COL12_HUMAN	MALT1_HUMAN	IGLL1_HUMAN	DDX21_HUMAN	DSRAD_HUMAN	DDX60_HUMAN	FES_HUMAN	K1C16_HUMAN	CD244_HUMAN	MPEG1_HUMAN	HLAA_HUMAN	IGHA1_HUMAN	CATIN_HUMAN	CFAI_HUMAN	CMGA_HUMAN	NCF1_HUMAN	CRIS3_HUMAN	ELF4_HUMAN	JAK3_HUMAN	ITAM_HUMAN	AGRB1_HUMAN	C1RL_HUMAN	CYBC1_HUMAN	ANKH1_HUMAN	DHX9_HUMAN	DHX36_HUMAN	DDX1_HUMAN	DDX58_HUMAN	MATR3_HUMAN	BIRC1_HUMAN	PML_HUMAN
biological_process	GO:0008284	positive regulation of cell population proliferation	110	545	0.201835	0.997503	0.0031941	1	1	NANP8_HUMAN	PBX1_HUMAN	TPO_HUMAN	TIAR_HUMAN	RUNX2_HUMAN	PRAM5_HUMAN	PRA22_HUMAN	LRP5_HUMAN	MARH7_HUMAN	MAZ_HUMAN	CDN1B_HUMAN	HIPK1_HUMAN	HCLS1_HUMAN	ITAX_HUMAN	MEIS2_HUMAN	NOP2_HUMAN	BCL2_HUMAN	INSR_HUMAN	KIF14_HUMAN	NOTC1_HUMAN	CD248_HUMAN	I11RA_HUMAN	BIRC6_HUMAN	FINC_HUMAN	FAKD4_HUMAN	DHYS_HUMAN	FOXM1_HUMAN	CDC20_HUMAN	FZR1_HUMAN	GREM1_HUMAN	KMT2D_HUMAN	FA98B_HUMAN	MEP50_HUMAN	GAB2_HUMAN	EGF_HUMAN	PRA18_HUMAN	CP131_HUMAN	PRTN3_HUMAN	PRA13_HUMAN	CD123_HUMAN
biological_process	GO:0006511	ubiquitin-dependent protein catabolic process	107	429	0.249417	0.94016	0.0702372	1	1	PSA6_HUMAN	TRI25_HUMAN	TP4AP_HUMAN	TOPRS_HUMAN	RNF6_HUMAN	RN111_HUMAN	CR025_HUMAN	AKIB1_HUMAN	FBXL4_HUMAN	HACE1_HUMAN	AREL1_HUMAN	BRE1A_HUMAN	FBXW4_HUMAN	NPL4_HUMAN	SMUF1_HUMAN	SMUF2_HUMAN	RNF11_HUMAN	RN213_HUMAN	UBQL1_HUMAN	RNF8_HUMAN	MDM2_HUMAN	NEDD4_HUMAN	U17L3_HUMAN	SQSTM_HUMAN	UL17C_HUMAN	UBP16_HUMAN	TRIPC_HUMAN	UBP38_HUMAN	RFFL_HUMAN	U17LB_HUMAN	UBL7_HUMAN	UBQL3_HUMAN	U17LM_HUMAN	UBP32_HUMAN	UBP34_HUMAN	U17LF_HUMAN	PSA1_HUMAN	U17LA_HUMAN	UBP29_HUMAN	U17L5_HUMAN
biological_process	GO:0006397	mRNA processing	94	354	0.265537	0.981999	0.0221899	1	1	SUGP2_HUMAN	RBY1B_HUMAN	RBY1D_HUMAN	RBY1E_HUMAN	RED2_HUMAN	TR150_HUMAN	SPT6H_HUMAN	SRSF4_HUMAN	SRRT_HUMAN	DDX47_HUMAN	DSRAD_HUMAN	ELAV4_HUMAN	AFF2_HUMAN	ERN2_HUMAN	FAKD5_HUMAN	CELF1_HUMAN	FUBP2_HUMAN	HABP4_HUMAN	BRDT_HUMAN	FL2D_HUMAN	PAN2_HUMAN	SON_HUMAN	PP4R2_HUMAN	RFOX1_HUMAN	SFR19_HUMAN	SEN34_HUMAN	PRP8_HUMAN	RFOX2_HUMAN	TRUB2_HUMAN	PR38B_HUMAN	SCAFB_HUMAN	SRRM4_HUMAN	SCAF4_HUMAN	SNR48_HUMAN	TADBP_HUMAN	RFOX3_HUMAN	SUGP1_HUMAN	PRGC1_HUMAN	PHRF1_HUMAN	U2AF2_HUMAN
biological_process	GO:0016567	protein ubiquitination	94	534	0.17603	0.895924	0.119774	1	1	PJA2_HUMAN	RO52_HUMAN	TRI47_HUMAN	TRI48_HUMAN	TRAIP_HUMAN	TRI55_HUMAN	TRI63_HUMAN	TRIM4_HUMAN	NF2L2_HUMAN	TR49D_HUMAN	TP4AP_HUMAN	RNF6_HUMAN	RN111_HUMAN	MARHA_HUMAN	LMO7_HUMAN	HECW2_HUMAN	HERC2_HUMAN	HACE1_HUMAN	AREL1_HUMAN	BRCA1_HUMAN	BIRC6_HUMAN	CDC27_HUMAN	FBX43_HUMAN	CDC20_HUMAN	EIPR1_HUMAN	CUL2_HUMAN	FBXL5_HUMAN	RN135_HUMAN	SMUF1_HUMAN	SMUF2_HUMAN	RN152_HUMAN	RNF25_HUMAN	RN169_HUMAN	RN213_HUMAN	RN157_HUMAN	OTUL_HUMAN	SH3R1_HUMAN	RNF8_HUMAN	MDM2_HUMAN	NEDD4_HUMAN
biological_process	GO:0008285	negative regulation of cell population proliferation	88	463	0.190065	0.787652	0.240179	1	1	P3H3_HUMAN	RBM5_HUMAN	RASF5_HUMAN	TAF6_HUMAN	TIAR_HUMAN	TNR8_HUMAN	TNS2_HUMAN	GTPB4_HUMAN	LMNA_HUMAN	ACVL1_HUMAN	ITA1_HUMAN	HGS_HUMAN	HMGA1_HUMAN	DDX20_HUMAN	CDN1B_HUMAN	APC_HUMAN	NOTC1_HUMAN	MTBP_HUMAN	KLF10_HUMAN	AGRB1_HUMAN	CTNB1_HUMAN	DUX4_HUMAN	ARID2_HUMAN	CELF1_HUMAN	COIA1_HUMAN	E2F7_HUMAN	LAS2_HUMAN	MNAR1_HUMAN	PML_HUMAN	ING2_HUMAN	KAT2B_HUMAN	BTG1_HUMAN	FOXO4_HUMAN	MTG16_HUMAN	P53_HUMAN	KANK2_HUMAN	NOS3_HUMAN	SIR2_HUMAN	SIR6_HUMAN	MEN1_HUMAN
biological_process	GO:0043065	positive regulation of apoptotic process	78	346	0.225434	0.881617	0.141031	1	1	RBM5_HUMAN	TAF6_HUMAN	TNR8_HUMAN	RIPK2_HUMAN	M3K20_HUMAN	MPRI_HUMAN	KNG1_HUMAN	DDX20_HUMAN	HIP1R_HUMAN	APC_HUMAN	HTRA2_HUMAN	DUS6_HUMAN	BIN1_HUMAN	FAN_HUMAN	ING3_HUMAN	APBB1_HUMAN	CTNB1_HUMAN	BCLF1_HUMAN	E2F1_HUMAN	BNIP3_HUMAN	FAF1_HUMAN	P53_HUMAN	CDK19_HUMAN	MNDA_HUMAN	RIPK1_HUMAN	NF1_HUMAN	SHIP1_HUMAN	PXT1_HUMAN	PRKDC_HUMAN	STK4_HUMAN	NOE1_HUMAN	SQSTM_HUMAN	SCIN_HUMAN	ST17B_HUMAN	TXNIP_HUMAN	STPG1_HUMAN	NCOA1_HUMAN	PKHN1_HUMAN	PI5L1_HUMAN	PHLA1_HUMAN
biological_process	GO:0006955	immune response	77	583	0.132075	0.00717387	0.993801	1	1	PE2R4_HUMAN	TRBC1_HUMAN	MARH1_HUMAN	M3K14_HUMAN	HTF4_HUMAN	KI2L1_HUMAN	AIRE_HUMAN	I27RA_HUMAN	IGLL1_HUMAN	IRF8_HUMAN	HLAH_HUMAN	KVD21_HUMAN	LIRB2_HUMAN	HLAA_HUMAN	IGHA1_HUMAN	KV224_HUMAN	NOTC1_HUMAN	KV621_HUMAN	CCL21_HUMAN	CCR2_HUMAN	KV502_HUMAN	CCR9_HUMAN	CD8A_HUMAN	ITAD_HUMAN	ENPP1_HUMAN	LAX1_HUMAN	KV401_HUMAN	PKHL1_HUMAN	IGHA2_HUMAN	M4K2_HUMAN	CD209_HUMAN	NECT1_HUMAN	KVD24_HUMAN	SP2_HUMAN	TNF13_HUMAN	PRG4_HUMAN	SCAP_HUMAN	TNF15_HUMAN	SEM4D_HUMAN	RFX1_HUMAN
biological_process	GO:0016192	vesicle-mediated transport	77	525	0.146667	0.985373	0.0166201	1	1	SYT3_HUMAN	SYTL2_HUMAN	RTN3_HUMAN	STON2_HUMAN	KALRN_HUMAN	JIP1_HUMAN	JIP4_HUMAN	KIF5A_HUMAN	AP1B1_HUMAN	GOGA4_HUMAN	AP2M1_HUMAN	CECR2_HUMAN	FMN2_HUMAN	CAMLG_HUMAN	INTU_HUMAN	SPTN2_HUMAN	SPTN4_HUMAN	RAB32_HUMAN	STXB3_HUMAN	VP9D1_HUMAN	VP33B_HUMAN	TBCD4_HUMAN	TBC23_HUMAN	TBC8B_HUMAN	PICAL_HUMAN	TSC2_HUMAN	RAE2_HUMAN	AP2B1_HUMAN	MYO5A_HUMAN	MYO5B_HUMAN	ARAP3_HUMAN	AP4M1_HUMAN	AHI1_HUMAN	ARFG1_HUMAN	B7Z879_HUMAN	A0A590UJA6_HUMAN	H3BR36_HUMAN	A0A669KAY5_HUMAN	C9JWL4_HUMAN	H3BM58_HUMAN
biological_process	GO:0006897	endocytosis	76	265	0.286792	0.994812	0.00666337	1	1	PK3C3_HUMAN	VATH_HUMAN	RUBIC_HUMAN	SH3K1_HUMAN	TOM1_HUMAN	LRP2_HUMAN	LRP5_HUMAN	LRP12_HUMAN	HTR5A_HUMAN	ANK2_HUMAN	HIP1R_HUMAN	AP2M1_HUMAN	ATP9A_HUMAN	BIN1_HUMAN	FKB15_HUMAN	EP15R_HUMAN	EPN2_HUMAN	EHBP1_HUMAN	ENTD1_HUMAN	P3C2A_HUMAN	EPS15_HUMAN	CD209_HUMAN	LDLR_HUMAN	SYNRG_HUMAN	RHOU_HUMAN	PK3CG_HUMAN	SHIP2_HUMAN	SCAM1_HUMAN	RIN3_HUMAN	RIN2_HUMAN	REPS2_HUMAN	UBP33_HUMAN	ZFYV9_HUMAN	PICAL_HUMAN	TSC2_HUMAN	AAK1_HUMAN	ATP9B_HUMAN	HIP1_HUMAN	MYO1E_HUMAN	MYO6_HUMAN
biological_process	GO:0007186	G protein-coupled receptor signaling pathway	72	541	0.133087	4.81854e-06	0.999997	0.009	1	PE2R2_HUMAN	PDE3B_HUMAN	PI3R5_HUMAN	TAFA5_HUMAN	RGS17_HUMAN	GNB1L_HUMAN	GPSM2_HUMAN	MAS1L_HUMAN	ITPR3_HUMAN	MPRI_HUMAN	HRH1_HUMAN	INSR_HUMAN	OR8D2_HUMAN	NMU_HUMAN	BCAR1_HUMAN	CCL21_HUMAN	DGKQ_HUMAN	CCR9_HUMAN	AGRG4_HUMAN	AGRA1_HUMAN	AGRB1_HUMAN	GP157_HUMAN	APOA1_HUMAN	GRK6_HUMAN	GPR37_HUMAN	P2Y14_HUMAN	OR1D4_HUMAN	O10J1_HUMAN	PLCB4_HUMAN	PK3CG_HUMAN	VAV_HUMAN	PRLHR_HUMAN	RIC8B_HUMAN	P2Y13_HUMAN	RPGF4_HUMAN	OR1D5_HUMAN	PLCB3_HUMAN	PLPR4_HUMAN	RGS12_HUMAN	UCN1_HUMAN
biological_process	GO:0051607	defense response to virus	71	300	0.236667	0.987789	0.0168418	1	1	NLRP1_HUMAN	DDIT4_HUMAN	LYST_HUMAN	M3K14_HUMAN	DDX21_HUMAN	DSRAD_HUMAN	DDX60_HUMAN	ITAX_HUMAN	BCL2_HUMAN	DDX17_HUMAN	DHX36_HUMAN	CBPC5_HUMAN	DDX1_HUMAN	DDX58_HUMAN	BNIP3_HUMAN	NLRP9_HUMAN	PERF_HUMAN	RNAS2_HUMAN	OAS3_HUMAN	MX2_HUMAN	RPC2_HUMAN	SETD2_HUMAN	PARP9_HUMAN	STING_HUMAN	STAT2_HUMAN	NLRC5_HUMAN	UBP29_HUMAN	PTPRC_HUMAN	ZMY11_HUMAN	TREX1_HUMAN	TLR9_HUMAN	ZN175_HUMAN	TLR3_HUMAN	ZC12A_HUMAN	ZCCHV_HUMAN	UN13D_HUMAN	ABCF3_HUMAN	DHX58_HUMAN	IF16_HUMAN	IL23A_HUMAN
biological_process	GO:0008380	RNA splicing	70	297	0.23569	0.485911	0.55226	1	1	PDCD7_HUMAN	SUGP2_HUMAN	RBY1B_HUMAN	RBY1D_HUMAN	RBY1E_HUMAN	TR150_HUMAN	SPT6H_HUMAN	SRSF4_HUMAN	DDX47_HUMAN	ELAV4_HUMAN	FUS_HUMAN	AFF2_HUMAN	FUBP2_HUMAN	HABP4_HUMAN	BRDT_HUMAN	DHX8_HUMAN	FL2D_HUMAN	SON_HUMAN	PP4R2_HUMAN	RFOX1_HUMAN	SFR19_HUMAN	PRP8_HUMAN	RFOX2_HUMAN	PR38B_HUMAN	SCAFB_HUMAN	SRRM4_HUMAN	SNR48_HUMAN	SRPK1_HUMAN	TADBP_HUMAN	RFOX3_HUMAN	SUGP1_HUMAN	PRGC1_HUMAN	WT1_HUMAN	THOC7_HUMAN	TTF2_HUMAN	ZN638_HUMAN	RBP56_HUMAN	CELF3_HUMAN	CDK12_HUMAN	ACINU_HUMAN
biological_process	GO:0006954	inflammatory response	66	450	0.146667	0.0932699	0.921014	1	1	PE2R2_HUMAN	PE2R4_HUMAN	PGBM_HUMAN	PJA2_HUMAN	PI2R_HUMAN	NF2L2_HUMAN	NLRP1_HUMAN	TNIP3_HUMAN	RIPK2_HUMAN	HDAC9_HUMAN	LICH_HUMAN	MAPK2_HUMAN	KNG1_HUMAN	KDM6B_HUMAN	K1C16_HUMAN	HRH1_HUMAN	CELA1_HUMAN	NFAC3_HUMAN	CCL21_HUMAN	CCR2_HUMAN	ITAL_HUMAN	DHX9_HUMAN	CRHBP_HUMAN	CH3L1_HUMAN	BIRC1_HUMAN	GSDMD_HUMAN	FAS_HUMAN	NLRP9_HUMAN	NOD1_HUMAN	PA24B_HUMAN	NOS2_HUMAN	RIPK1_HUMAN	PK3CG_HUMAN	SCG2_HUMAN	TLR1_HUMAN	SCYL1_HUMAN	SDC1_HUMAN	I17RE_HUMAN	TNR1B_HUMAN	OLR1_HUMAN
biological_process	GO:0034765	regulation of ion transmembrane transport	66	272	0.242647	0.741535	0.29125	1	1	KCNV1_HUMAN	HCN1_HUMAN	CAC1G_HUMAN	CAC1F_HUMAN	CAC1E_HUMAN	CTSR1_HUMAN	KCNQ2_HUMAN	KCNH3_HUMAN	KCNKH_HUMAN	NALCN_HUMAN	CAC1A_HUMAN	SCN7A_HUMAN	SCNBA_HUMAN	NEDD4_HUMAN	WWP2_HUMAN	TRPM5_HUMAN	KCNQ5_HUMAN	KCNH8_HUMAN	KCNH7_HUMAN	CAC1B_HUMAN	CA2D4_HUMAN	CY24B_HUMAN	E9PG18_HUMAN	A0A494C184_HUMAN	B5TYJ1_HUMAN	A0A6Q8PFM8_HUMAN	K7EQ95_HUMAN	E9PHB6_HUMAN	A0A087WVX5_HUMAN	A0A2U3TZM7_HUMAN	F8WEA4_HUMAN	K7EKF7_HUMAN	F6RH32_HUMAN	A0A0G2JR54_HUMAN	A0A0A0MRC8_HUMAN	A0A1B0GTI4_HUMAN	B1AQK7_HUMAN	E9PDI6_HUMAN	K7EJY1_HUMAN	A0A0A0MSC0_HUMAN
biological_process	GO:0043547	positive regulation of GTPase activity	65	290	0.224138	0.973668	0.0348166	1	1	PLXB1_HUMAN	RIC1_HUMAN	RHGBA_HUMAN	SMCR8_HUMAN	SGSM2_HUMAN	SGSM3_HUMAN	SRGP2_HUMAN	CDKL5_HUMAN	CCL21_HUMAN	BIN1_HUMAN	EVI5L_HUMAN	ARAP2_HUMAN	EVI5_HUMAN	GRP1_HUMAN	PRTN3_HUMAN	NF1_HUMAN	RPGF6_HUMAN	SEM4D_HUMAN	US6NL_HUMAN	VAV_HUMAN	RHG27_HUMAN	RHG06_HUMAN	PIN1_HUMAN	PKP4_HUMAN	RGMA_HUMAN	X3CL1_HUMAN	RGRF1_HUMAN	TBD2A_HUMAN	U17L2_HUMAN	PICAL_HUMAN	TSC2_HUMAN	RGS6_HUMAN	MYO9A_HUMAN	M4K4_HUMAN	ARAP3_HUMAN	DOC10_HUMAN	DOC11_HUMAN	DOCK8_HUMAN	DOCK9_HUMAN	ALS2_HUMAN
biological_process	GO:0002250	adaptive immune response	62	527	0.117647	7.71531e-05	0.999947	0.099	1	RIPK2_HUMAN	CD244_HUMAN	LAG3_HUMAN	KVD21_HUMAN	LIRB2_HUMAN	KV224_HUMAN	LAMP3_HUMAN	KV621_HUMAN	EOMES_HUMAN	KV502_HUMAN	JAK3_HUMAN	ERAP1_HUMAN	KLRD1_HUMAN	LAX1_HUMAN	KV401_HUMAN	FCRL4_HUMAN	PRDM1_HUMAN	CD209_HUMAN	LIRA6_HUMAN	LAIR1_HUMAN	KVD24_HUMAN	SIG10_HUMAN	SIT1_HUMAN	PK3CG_HUMAN	TVB23_HUMAN	RPGF4_HUMAN	TV382_HUMAN	TVB64_HUMAN	TNR11_HUMAN	TV381_HUMAN	TVAL1_HUMAN	TVA14_HUMAN	TVA86_HUMAN	TRDV3_HUMAN	TVAL2_HUMAN	ZN683_HUMAN	TXK_HUMAN	TAP2_HUMAN	TVA21_HUMAN	TSC1_HUMAN
biological_process	GO:0007268	chemical synaptic transmission	59	299	0.197324	0.955068	0.0540282	1	1	S12A7_HUMAN	LRP6_HUMAN	HAP1_HUMAN	KIF5A_HUMAN	HRH1_HUMAN	O10H1_HUMAN	DLGP1_HUMAN	PCDB5_HUMAN	CACB2_HUMAN	CAC1G_HUMAN	APBA2_HUMAN	APBA1_HUMAN	CTNB1_HUMAN	CAC1E_HUMAN	KCNQ2_HUMAN	NPFF_HUMAN	CAC1A_HUMAN	O10J6_HUMAN	O11H7_HUMAN	PCDBG_HUMAN	SC6A1_HUMAN	S12A6_HUMAN	SPTCS_HUMAN	SYN1_HUMAN	LPAR3_HUMAN	UN13B_HUMAN	PCDBD_HUMAN	UN13C_HUMAN	ACM5_HUMAN	BSN_HUMAN	DLG4_HUMAN	HOME1_HUMAN	MYBPP_HUMAN	GRIA1_HUMAN	NPTX1_HUMAN	MBP_HUMAN	CAC1B_HUMAN	CEP89_HUMAN	AKAP9_HUMAN	AMPH_HUMAN
biological_process	GO:0001525	angiogenesis	58	293	0.197952	0.989775	0.013292	1	1	PGBM_HUMAN	PDE3B_HUMAN	PLXD1_HUMAN	PK3CA_HUMAN	SEM4A_HUMAN	HIF1A_HUMAN	ACVL1_HUMAN	ECSCR_HUMAN	ANGP1_HUMAN	ANGP4_HUMAN	HIF3A_HUMAN	EPHB1_HUMAN	KLF5_HUMAN	AMOL1_HUMAN	ERAP1_HUMAN	EPAS1_HUMAN	FINC_HUMAN	ANGP2_HUMAN	ANGL3_HUMAN	ANGL4_HUMAN	COIA1_HUMAN	MED1_HUMAN	MNAR1_HUMAN	PKNX1_HUMAN	EGF_HUMAN	NRP2_HUMAN	C1GLT_HUMAN	MUC18_HUMAN	NOS3_HUMAN	ROBO4_HUMAN	PK3CG_HUMAN	SCG2_HUMAN	RN213_HUMAN	PLDX1_HUMAN	SETD2_HUMAN	S12A6_HUMAN	TBX4_HUMAN	SUH_HUMAN	XBP1_HUMAN	MYH9_HUMAN
biological_process	GO:0007605	sensory perception of sound	57	229	0.248908	0.99365	0.00972897	1	1	OTOG_HUMAN	LRP2_HUMAN	CDN1B_HUMAN	KCNQ1_HUMAN	CC14A_HUMAN	CHD7_HUMAN	CNTN5_HUMAN	EYA1_HUMAN	PKHL1_HUMAN	NIPBL_HUMAN	SPTN4_HUMAN	P2RX2_HUMAN	S26A5_HUMAN	TPRN_HUMAN	PCD15_HUMAN	SRRM4_HUMAN	USH2A_HUMAN	TARA_HUMAN	SPY2_HUMAN	Z354A_HUMAN	PO3F4_HUMAN	UCN1_HUMAN	OTOAN_HUMAN	UBP53_HUMAN	AT2B2_HUMAN	HOME2_HUMAN	MYO3A_HUMAN	MYO3B_HUMAN	NAV2_HUMAN	MYO6_HUMAN	MYO7A_HUMAN	MYO15_HUMAN	LRIG1_HUMAN	MBP_HUMAN	AGRV1_HUMAN	ES8L2_HUMAN	EYA4_HUMAN	E7EM53_HUMAN	F2Z2Y1_HUMAN	E9PCM2_HUMAN
biological_process	GO:0009410	response to xenobiotic stimulus	56	241	0.232365	0.737287	0.304883	1	1	PLIN2_HUMAN	RPN2_HUMAN	MRP6_HUMAN	MAP1B_HUMAN	GABT_HUMAN	CDN1B_HUMAN	FOSB_HUMAN	MDR1_HUMAN	BCL2_HUMAN	DUS6_HUMAN	EGLN_HUMAN	ITA3_HUMAN	CTNB1_HUMAN	CENPF_HUMAN	APOA2_HUMAN	ATR_HUMAN	FZD3_HUMAN	CREB1_HUMAN	ITA2_HUMAN	NNMT_HUMAN	NPAS2_HUMAN	SMTL1_HUMAN	PMS1_HUMAN	PMS2_HUMAN	NEC1_HUMAN	SCNBA_HUMAN	RPP21_HUMAN	SSXT_HUMAN	S26A5_HUMAN	SRBP1_HUMAN	TERF1_HUMAN	TXNIP_HUMAN	EMX2_HUMAN	TGFB2_HUMAN	XRCC1_HUMAN	PTPRM_HUMAN	TR11B_HUMAN	NFAC2_HUMAN	RET_HUMAN	TNFB_HUMAN
biological_process	GO:0006888	endoplasmic reticulum to Golgi vesicle-mediated transport	56	228	0.245614	0.997076	0.00452953	1	1	PEF1_HUMAN	TMED3_HUMAN	TMED6_HUMAN	SC24C_HUMAN	STX17_HUMAN	LMAN1_HUMAN	KLH12_HUMAN	BAP29_HUMAN	COPE_HUMAN	GBF1_HUMAN	COPB2_HUMAN	ANK1_HUMAN	SC24B_HUMAN	SC24D_HUMAN	S23IP_HUMAN	SC16B_HUMAN	TPC11_HUMAN	SC24A_HUMAN	SC16A_HUMAN	MIA2_HUMAN	SC31A_HUMAN	TGO1_HUMAN	TFG_HUMAN	TPPC8_HUMAN	YIPF5_HUMAN	USO1_HUMAN	TRIPB_HUMAN	GOGA2_HUMAN	CTGE4_HUMAN	CTGE9_HUMAN	BET1_HUMAN	COPB_HUMAN	CTGE6_HUMAN	CTGE8_HUMAN	CTGEF_HUMAN	J3KT08_HUMAN	H0Y8W8_HUMAN	A0A2R8YE69_HUMAN	D6REX3_HUMAN	H7C5E2_HUMAN
biological_process	GO:0030335	positive regulation of cell migration	54	244	0.221311	0.965574	0.0434942	1	1	PECA1_HUMAN	URP2_HUMAN	SYNE2_HUMAN	MYLK_HUMAN	SEM4A_HUMAN	SEM4G_HUMAN	ROCK2_HUMAN	HGF_HUMAN	MAZ_HUMAN	JIP4_HUMAN	ITAX_HUMAN	APC_HUMAN	INSR_HUMAN	NOTC1_HUMAN	BCAR1_HUMAN	LAMB1_HUMAN	ANGL3_HUMAN	GRB7_HUMAN	CARL1_HUMAN	EGF_HUMAN	MUC18_HUMAN	P85A_HUMAN	SYNP2_HUMAN	PODXL_HUMAN	SEM4D_HUMAN	STX4_HUMAN	SEM3B_HUMAN	SEM6C_HUMAN	SPY2_HUMAN	DAB2_HUMAN	TRIP6_HUMAN	P55G_HUMAN	XBP1_HUMAN	ZO1_HUMAN	ZN268_HUMAN	NTRK3_HUMAN	RET_HUMAN	SUN2_HUMAN	NUMB_HUMAN	ONEC2_HUMAN
biological_process	GO:0007601	visual perception	53	256	0.207031	0.907773	0.120086	1	1	PAX2_HUMAN	MRP6_HUMAN	PGTA_HUMAN	KIFC3_HUMAN	LRIT3_HUMAN	LAMC3_HUMAN	BBS4_HUMAN	CACB2_HUMAN	CNGA3_HUMAN	AOC2_HUMAN	CAC1F_HUMAN	BBS10_HUMAN	EPAS1_HUMAN	BFSP2_HUMAN	GUC2F_HUMAN	COIA1_HUMAN	PAX6_HUMAN	K1C12_HUMAN	PCARE_HUMAN	PO6F2_HUMAN	NCKX1_HUMAN	MKKS_HUMAN	RP1_HUMAN	RP1L1_HUMAN	USH2A_HUMAN	NR2E3_HUMAN	RPGR1_HUMAN	RIMS1_HUMAN	RPGR_HUMAN	XLRS1_HUMAN	LCTL_HUMAN	TYRO_HUMAN	PTHB1_HUMAN	ABCA4_HUMAN	FBLN3_HUMAN	MYO3A_HUMAN	MYO3B_HUMAN	MYO7A_HUMAN	MYO9A_HUMAN	HMCN1_HUMAN
biological_process	GO:0000209	protein polyubiquitination	52	231	0.225108	0.977445	0.0310428	1	1	PELI2_HUMAN	RO52_HUMAN	TOPRS_HUMAN	RN111_HUMAN	LRSM1_HUMAN	MARH1_HUMAN	AKIB1_HUMAN	HECW2_HUMAN	BCL2_HUMAN	HDAC6_HUMAN	HACE1_HUMAN	AREL1_HUMAN	BRCA1_HUMAN	CTNB1_HUMAN	BRE1A_HUMAN	RN135_HUMAN	SMUF1_HUMAN	SMUF2_HUMAN	RN180_HUMAN	RMD5A_HUMAN	MDM2_HUMAN	NEDD4_HUMAN	PPIL2_HUMAN	TRIPC_HUMAN	PRAME_HUMAN	WWP1_HUMAN	UB2J1_HUMAN	UBE3B_HUMAN	TRI14_HUMAN	UBE3D_HUMAN	WWP2_HUMAN	TAF1_HUMAN	UBE4B_HUMAN	UBR5_HUMAN	THOP1_HUMAN	RC3H1_HUMAN	RC3H2_HUMAN	AMFR_HUMAN	HUWE1_HUMAN	ITCH_HUMAN
biological_process	GO:0016055	Wnt signaling pathway	48	333	0.144144	0.636707	0.400293	1	1	SENP2_HUMAN	RTF1_HUMAN	SHSA6_HUMAN	TNIK_HUMAN	LRP6_HUMAN	APCL_HUMAN	HHEX_HUMAN	APC_HUMAN	CELA1_HUMAN	MACF1_HUMAN	DACT1_HUMAN	KLH12_HUMAN	AMOL1_HUMAN	GRK6_HUMAN	KAISO_HUMAN	PAF1_HUMAN	NKD2_HUMAN	FBXW4_HUMAN	CHD8_HUMAN	LDB1_HUMAN	OTUL_HUMAN	PKD2_HUMAN	DAB2_HUMAN	UBP34_HUMAN	TGFI1_HUMAN	TLE5_HUMAN	ZRAN1_HUMAN	TMM88_HUMAN	CELR2_HUMAN	AMER3_HUMAN	AMFR_HUMAN	NDRG2_HUMAN	AMOL2_HUMAN	AMER1_HUMAN	CTND2_HUMAN	C6ZRJ6_HUMAN	K7EQH5_HUMAN	G3V4S9_HUMAN	A0A0D9SGH8_HUMAN	H0Y663_HUMAN
biological_process	GO:0006887	exocytosis	47	195	0.241026	0.952007	0.0599567	1	1	SYT16_HUMAN	SYTL1_HUMAN	SYTL2_HUMAN	SYTL3_HUMAN	SYTL4_HUMAN	STX17_HUMAN	LGI3_HUMAN	HAP1_HUMAN	EX3L4_HUMAN	EX3L1_HUMAN	EXOC3_HUMAN	BIG1_HUMAN	P3C2A_HUMAN	MICA3_HUMAN	NKD2_HUMAN	ANK1_HUMAN	RHG44_HUMAN	SRCN1_HUMAN	SCAM1_HUMAN	STX1B_HUMAN	S17A9_HUMAN	STX4_HUMAN	TGO1_HUMAN	NALP5_HUMAN	BAIP3_HUMAN	D6RA03_HUMAN	A0A1B0GVW8_HUMAN	A0A0U1RQP0_HUMAN	A0A0U1RRJ3_HUMAN	H3BTH9_HUMAN	B1AM27_HUMAN	H0YNV0_HUMAN	H3BSU5_HUMAN	A0A087X1N4_HUMAN	A0A1B0GUS7_HUMAN	A0A3B3ISZ1_HUMAN	E5RGM0_HUMAN	A0A0C4DFV1_HUMAN	A0A0U1RQH1_HUMAN	D6RB59_HUMAN
biological_process	GO:0043123	positive regulation of I-kappaB kinase/NF-kappaB signaling	46	202	0.227723	0.953299	0.0661305	1	1	BRD4_HUMAN	PELI2_HUMAN	RO52_HUMAN	TAB2_HUMAN	TAB3_HUMAN	TRI25_HUMAN	RIPK2_HUMAN	M3K14_HUMAN	MALT1_HUMAN	M3K3_HUMAN	DDX21_HUMAN	CCL21_HUMAN	MIER1_HUMAN	CAR11_HUMAN	CTNB1_HUMAN	DHX36_HUMAN	DDX1_HUMAN	PKHG5_HUMAN	NOD2_HUMAN	NOD1_HUMAN	RIPK1_HUMAN	NUP62_HUMAN	TFG_HUMAN	TE2IP_HUMAN	TRIM8_HUMAN	TR10B_HUMAN	TRI14_HUMAN	X3CL1_HUMAN	UN5CL_HUMAN	TNR27_HUMAN	TLR9_HUMAN	TLR3_HUMAN	ZCCHV_HUMAN	LYRIC_HUMAN	TNR19_HUMAN	AT2C1_HUMAN	IKKB_HUMAN	IRAK1_HUMAN	ECM1_HUMAN	CIKS_HUMAN
biological_process	GO:0050821	protein stabilization	46	200	0.23	0.959855	0.0575004	1	1	PER3_HUMAN	TAF9B_HUMAN	MARH7_HUMAN	GTPB4_HUMAN	ANK2_HUMAN	HIP1R_HUMAN	CD37L_HUMAN	CAMLG_HUMAN	APOA1_HUMAN	APOA2_HUMAN	PML_HUMAN	CREB1_HUMAN	DSC3_HUMAN	EP300_HUMAN	NLK_HUMAN	MCAF1_HUMAN	P53_HUMAN	CHK2_HUMAN	PEX6_HUMAN	P85A_HUMAN	COG7_HUMAN	SAXO1_HUMAN	PEX19_HUMAN	SC16A_HUMAN	STK4_HUMAN	USP9X_HUMAN	MORC3_HUMAN	PRGC1_HUMAN	TELO2_HUMAN	UBP29_HUMAN	PIN1_HUMAN	UBP19_HUMAN	TAF1_HUMAN	UBP33_HUMAN	TREX1_HUMAN	UBP36_HUMAN	TCPH_HUMAN	UBP2_HUMAN	TSC1_HUMAN	TMM88_HUMAN
biological_process	GO:0001666	response to hypoxia	45	158	0.28481	0.962438	0.0502313	1	1	HIF1A_HUMAN	DDIT4_HUMAN	ARNT2_HUMAN	ITPR1_HUMAN	ACVL1_HUMAN	GABT_HUMAN	ITPR2_HUMAN	CDN1B_HUMAN	ARNT_HUMAN	HIF3A_HUMAN	EGR1_HUMAN	ENPL_HUMAN	EGLN_HUMAN	EPAS1_HUMAN	ANGP2_HUMAN	ANGL4_HUMAN	GTR1_HUMAN	BNIP3_HUMAN	PML_HUMAN	ITA2_HUMAN	EP300_HUMAN	MTG16_HUMAN	NOS2_HUMAN	NF1_HUMAN	P2RX2_HUMAN	SCAP_HUMAN	USF1_HUMAN	SRF_HUMAN	PKHN1_HUMAN	TGFB2_HUMAN	PUR8_HUMAN	XRCC1_HUMAN	VEGFB_HUMAN	PIN1_HUMAN	TGBR3_HUMAN	TNFB_HUMAN	ACE_HUMAN	MYCD_HUMAN	NU5M_HUMAN	CIAO3_HUMAN
biological_process	GO:0001934	positive regulation of protein phosphorylation	45	204	0.220588	0.976719	0.0290218	1	1	PELI2_HUMAN	PECA1_HUMAN	TPO_HUMAN	PLPL9_HUMAN	TNIK_HUMAN	ROCK2_HUMAN	BRAT1_HUMAN	HGF_HUMAN	ANGP1_HUMAN	DAXX_HUMAN	INSR_HUMAN	EGLN_HUMAN	ITB3_HUMAN	GRP1_HUMAN	LIMC1_HUMAN	CHK2_HUMAN	LIMK2_HUMAN	RIPK1_HUMAN	NIBA1_HUMAN	SEM4D_HUMAN	STK4_HUMAN	SQSTM_HUMAN	DAB2_HUMAN	P55G_HUMAN	VEGFB_HUMAN	PIN1_HUMAN	XBP1_HUMAN	ZN268_HUMAN	NTRK3_HUMAN	NTRK2_HUMAN	PROM2_HUMAN	BAKOR_HUMAN	RBCC1_HUMAN	ATF2_HUMAN	IFNG_HUMAN	KKCC2_HUMAN	HIPK2_HUMAN	E2AK4_HUMAN	CCND3_HUMAN	A4_HUMAN
biological_process	GO:0007229	integrin-mediated signaling pathway	42	190	0.221053	0.853931	0.189782	1	1	LAMA3_HUMAN	URP2_HUMAN	TLN1_HUMAN	ITA1_HUMAN	ITB4_HUMAN	ITAX_HUMAN	ERBIN_HUMAN	ATS13_HUMAN	BCAR1_HUMAN	ITA3_HUMAN	ITAD_HUMAN	ITAL_HUMAN	ITAM_HUMAN	FINC_HUMAN	APOA1_HUMAN	ANGL3_HUMAN	FYB2_HUMAN	ITA2_HUMAN	ITB3_HUMAN	LAMA5_HUMAN	VAV_HUMAN	MADCA_HUMAN	ZYX_HUMAN	TXK_HUMAN	MYH9_HUMAN	CEAM1_HUMAN	FUT8_HUMAN	FYB1_HUMAN	ISG15_HUMAN	ITA2B_HUMAN	DOCK1_HUMAN	DYST_HUMAN	ABL1_HUMAN	I3L4X8_HUMAN	E7EMF1_HUMAN	U3KQ59_HUMAN	E7ESP4_HUMAN	H3BM21_HUMAN	E9PB77_HUMAN	H3BN02_HUMAN
biological_process	GO:0008360	regulation of cell shape	41	162	0.253086	0.980339	0.0303983	1	1	PEAK3_HUMAN	PLXA3_HUMAN	PLXA4_HUMAN	PLXB1_HUMAN	PLXB2_HUMAN	PLXB3_HUMAN	PLXD1_HUMAN	MKLN1_HUMAN	SEM4A_HUMAN	SH3K1_HUMAN	BRWD3_HUMAN	FES_HUMAN	EPB42_HUMAN	FGD6_HUMAN	ARHGI_HUMAN	FINC_HUMAN	EPS8_HUMAN	DNMBP_HUMAN	CFDP1_HUMAN	BRWD1_HUMAN	F1711_HUMAN	FGD5_HUMAN	RHOU_HUMAN	S26A5_HUMAN	SEM4D_HUMAN	SHRM3_HUMAN	RND3_HUMAN	PKHO1_HUMAN	WASF3_HUMAN	RHG18_HUMAN	MYH9_HUMAN	TAOK2_HUMAN	PRAG1_HUMAN	AT10A_HUMAN	MYH10_HUMAN	BAIP2_HUMAN	BORG2_HUMAN	ERMIN_HUMAN	H0Y7Z1_HUMAN	E9PCM2_HUMAN
biological_process	GO:0042127	regulation of cell population proliferation	41	204	0.20098	0.996011	0.00476167	1	1	PE2R2_HUMAN	TOPRS_HUMAN	MENT_HUMAN	GRDN_HUMAN	ALK_HUMAN	FES_HUMAN	CELA1_HUMAN	BCL6B_HUMAN	CHK1_HUMAN	EGLN_HUMAN	BIRC6_HUMAN	FOXM1_HUMAN	CFDP1_HUMAN	LAMA5_HUMAN	PRDM1_HUMAN	MITF_HUMAN	LTK_HUMAN	NOS2_HUMAN	SGK2_HUMAN	RFOX2_HUMAN	TPD54_HUMAN	PLAK_HUMAN	TCFL5_HUMAN	STAT4_HUMAN	STA5B_HUMAN	PKD2_HUMAN	TXNIP_HUMAN	STA5A_HUMAN	TGFB2_HUMAN	STAT2_HUMAN	NKX23_HUMAN	U17L2_HUMAN	AP2C_HUMAN	AP2B_HUMAN	CCND3_HUMAN	AMBN_HUMAN	CNN2_HUMAN	CHSTB_HUMAN	CADM4_HUMAN	ARHG2_HUMAN
biological_process	GO:0030198	extracellular matrix organization	41	188	0.218085	0.985497	0.0196656	1	1	SMOC1_HUMAN	ATS13_HUMAN	ATS2_HUMAN	DMP1_HUMAN	COIA1_HUMAN	ATL2_HUMAN	ATS16_HUMAN	ATS7_HUMAN	MMP26_HUMAN	ATS20_HUMAN	OLM2B_HUMAN	NF1_HUMAN	TENR_HUMAN	SMOC2_HUMAN	PXDN_HUMAN	POMT1_HUMAN	TR11B_HUMAN	RECK_HUMAN	VITRN_HUMAN	ATX1L_HUMAN	ATS12_HUMAN	ATL3_HUMAN	ATS14_HUMAN	ATS18_HUMAN	MRCOL_HUMAN	COOA1_HUMAN	A4_HUMAN	CORA1_HUMAN	CO1A2_HUMAN	CO4A6_HUMAN	CO5A2_HUMAN	CO6A5_HUMAN	CO6A6_HUMAN	COFA1_HUMAN	ATL4_HUMAN	I3L4X8_HUMAN	E7EMF1_HUMAN	E7ESP4_HUMAN	H3BM21_HUMAN	H3BN02_HUMAN
biological_process	GO:0006508	proteolysis	40	292	0.136986	0.553322	0.469552	1	1	PGCA_HUMAN	SENP1_HUMAN	TSSP_HUMAN	MALT1_HUMAN	ACPH_HUMAN	FA5_HUMAN	FBXL6_HUMAN	CELA1_HUMAN	HTRA2_HUMAN	ATS13_HUMAN	KLK14_HUMAN	CATE_HUMAN	CFAI_HUMAN	ERAP1_HUMAN	FA9_HUMAN	CATF_HUMAN	FA8_HUMAN	MMP26_HUMAN	KLK12_HUMAN	KLK4_HUMAN	PRTN3_HUMAN	NEC1_HUMAN	RNPL1_HUMAN	ST14_HUMAN	TSP50_HUMAN	SPRTN_HUMAN	TM11E_HUMAN	OLR1_HUMAN	PRS47_HUMAN	UBA3_HUMAN	THOP1_HUMAN	RENI_HUMAN	ACE_HUMAN	CBPB1_HUMAN	CAN13_HUMAN	GPAA1_HUMAN	AMPN_HUMAN	GGT5_HUMAN	CBPA1_HUMAN	CBPA4_HUMAN
biological_process	GO:0006979	response to oxidative stress	39	170	0.229412	0.982267	0.0231606	1	1	PERT_HUMAN	ERCC6_HUMAN	OXR1_HUMAN	BTG1_HUMAN	OXSR1_HUMAN	MSRA_HUMAN	PNKP_HUMAN	SGK2_HUMAN	SCAR3_HUMAN	WRN_HUMAN	PXDN_HUMAN	UCN1_HUMAN	PXDNL_HUMAN	MSRB3_HUMAN	ABCBB_HUMAN	DUOX2_HUMAN	A4_HUMAN	ALS2_HUMAN	ABL1_HUMAN	ERCC3_HUMAN	F5H6G9_HUMAN	A0A0G2JR31_HUMAN	A0A087WT12_HUMAN	R4GNE4_HUMAN	H0YAV0_HUMAN	H0YFW5_HUMAN	H0Y6H4_HUMAN	E9PGK7_HUMAN	A0A0G2JR90_HUMAN	A0A0G2JR79_HUMAN	A0A0G2JP53_HUMAN	A0A0G2JRZ1_HUMAN	H7C1F5_HUMAN	A0A087X247_HUMAN	A0A0G2JNN7_HUMAN	F5H199_HUMAN	X6RAN8_HUMAN	A0A0A0MQU7_HUMAN	F5H7C4_HUMAN
biological_process	GO:0019221	cytokine-mediated signaling pathway	39	189	0.206349	0.994034	0.00786269	1	1	I27RA_HUMAN	LIRB2_HUMAN	I20RA_HUMAN	IRAK3_HUMAN	CCR2_HUMAN	I11RA_HUMAN	JAK3_HUMAN	CSF3R_HUMAN	LIRA6_HUMAN	OSMR_HUMAN	STAT4_HUMAN	STA5B_HUMAN	STA5A_HUMAN	PRLR_HUMAN	STAT2_HUMAN	TYK2_HUMAN	X3CL1_HUMAN	LIRB3_HUMAN	IL16_HUMAN	IL2RB_HUMAN	IL6RA_HUMAN	IL6RB_HUMAN	LIRB1_HUMAN	IRAK1_HUMAN	DUOX2_HUMAN	CSF3_HUMAN	A0A494C164_HUMAN	A0A494C1L3_HUMAN	A0A494C0B5_HUMAN	E9PPF2_HUMAN	J3QRA1_HUMAN	B4DHE0_HUMAN	H3BSR6_HUMAN	A0A7I2V380_HUMAN	A0A7I2YQF1_HUMAN	K7EK35_HUMAN	A0A7I2YQY3_HUMAN	B4DLC8_HUMAN	E9PM19_HUMAN
biological_process	GO:0072659	protein localization to plasma membrane	38	156	0.24359	0.990326	0.0140322	1	1	TNIK_HUMAN	ROCK2_HUMAN	LRP6_HUMAN	ANK2_HUMAN	HYCCI_HUMAN	NFASC_HUMAN	FCHO2_HUMAN	B3AT_HUMAN	CACB2_HUMAN	F126B_HUMAN	GP158_HUMAN	ANK3_HUMAN	FYB2_HUMAN	GAK_HUMAN	LAMA5_HUMAN	NKD2_HUMAN	ANK1_HUMAN	SMUF1_HUMAN	SPTN4_HUMAN	RPGF6_HUMAN	PLAK_HUMAN	SLMAP_HUMAN	SC16A_HUMAN	TTC8_HUMAN	PPIL2_HUMAN	SPTB2_HUMAN	ROCK1_HUMAN	PKP2_HUMAN	WNK3_HUMAN	PTC1_HUMAN	TMM88_HUMAN	DEN4C_HUMAN	ABCAC_HUMAN	IKKB_HUMAN	MYO5A_HUMAN	FYB1_HUMAN	CLAP2_HUMAN	A0A087X0K8_HUMAN
biological_process	GO:0018105	peptidyl-serine phosphorylation	38	174	0.218391	0.985673	0.0200611	1	1	ST32A_HUMAN	STK39_HUMAN	SMG1_HUMAN	TTBK2_HUMAN	ROCK2_HUMAN	MAPK5_HUMAN	LMTK2_HUMAN	MARK3_HUMAN	M3K12_HUMAN	MAST1_HUMAN	MAST2_HUMAN	MAPK2_HUMAN	MAST4_HUMAN	AURKA_HUMAN	HIPK1_HUMAN	BCL2_HUMAN	HIPK3_HUMAN	GWL_HUMAN	DGKQ_HUMAN	ATR_HUMAN	PKD1_HUMAN	CHK2_HUMAN	CLSPN_HUMAN	SMTL1_HUMAN	SGK2_HUMAN	PKN3_HUMAN	PRKDC_HUMAN	STK4_HUMAN	MORC3_HUMAN	ROCK1_HUMAN	VRK2_HUMAN	TSSK4_HUMAN	WNK1_HUMAN	TAF1_HUMAN	IKKB_HUMAN	HIPK2_HUMAN	ATM_HUMAN	J3KRA9_HUMAN
biological_process	GO:0090090	negative regulation of canonical Wnt signaling pathway	38	198	0.191919	0.619314	0.451245	1	1	RBMS3_HUMAN	SHSA6_HUMAN	APCL_HUMAN	DAPLE_HUMAN	APC_HUMAN	NOTC1_HUMAN	EGR1_HUMAN	DACT1_HUMAN	CTNB1_HUMAN	ANKR6_HUMAN	GREM1_HUMAN	PRIC1_HUMAN	NKD2_HUMAN	CHD8_HUMAN	NPHP4_HUMAN	P2R3A_HUMAN	SCYL2_HUMAN	SOX2_HUMAN	SOX13_HUMAN	STK4_HUMAN	WWTR1_HUMAN	DAB2_HUMAN	PTPRO_HUMAN	TF7L2_HUMAN	TLE5_HUMAN	TMM88_HUMAN	AMFR_HUMAN	FOXO3_HUMAN	HECW1_HUMAN	BICC1_HUMAN	A4_HUMAN	GLI1_HUMAN	GLI3_HUMAN	AMER1_HUMAN	G3V5Z7_HUMAN	G3V295_HUMAN	F5GX11_HUMAN	G3V3I1_HUMAN
biological_process	GO:0000398	mRNA splicing, via spliceosome	37	251	0.14741	0.0897678	0.929056	1	1	RBM5_HUMAN	RBM6_HUMAN	SNW1_HUMAN	SRSF4_HUMAN	SART3_HUMAN	CATIN_HUMAN	C19L2_HUMAN	PABP1_HUMAN	DHX8_HUMAN	PAXB1_HUMAN	CRNL1_HUMAN	SRS10_HUMAN	SRS12_HUMAN	SPF45_HUMAN	PRP8_HUMAN	TFP11_HUMAN	PPIL1_HUMAN	PRP16_HUMAN	SYF1_HUMAN	PININ_HUMAN	SRRM2_HUMAN	U2AF2_HUMAN	U520_HUMAN	RBM10_HUMAN	RBM14_HUMAN	RBM19_HUMAN	DHX16_HUMAN	DDX5_HUMAN	ISY1_HUMAN	AQR_HUMAN	GEMI5_HUMAN	F5H658_HUMAN	G3V3A4_HUMAN	H0YH15_HUMAN	Q5JY65_HUMAN	A0A0A0MRN0_HUMAN	G3V5R3_HUMAN
biological_process	GO:0006629	lipid metabolic process	37	292	0.126712	7.10011e-26	1	0	1	PGBM_HUMAN	LRP2_HUMAN	LRP1_HUMAN	KBTB2_HUMAN	FS2P1_HUMAN	FMO5_HUMAN	ANGL4_HUMAN	MDR3_HUMAN	PITM1_HUMAN	ODBB_HUMAN	LDLR_HUMAN	SRBP1_HUMAN	SRBP2_HUMAN	ZN202_HUMAN	PTN22_HUMAN	ZN670_HUMAN	ZFP69_HUMAN	OCRL_HUMAN	LIPE_HUMAN	LPIN2_HUMAN	ABCA2_HUMAN	J3QQQ0_HUMAN	A0A590UJC7_HUMAN	M0QYE6_HUMAN	Q5T770_HUMAN	E7EUK6_HUMAN	E7ET49_HUMAN	M0R0K3_HUMAN	M0R2F9_HUMAN	A0A0C4DG51_HUMAN	E7EUJ1_HUMAN	M0R1V8_HUMAN	H0Y6T3_HUMAN	A0A590UK51_HUMAN	A0A1B0GW80_HUMAN	H7BYX7_HUMAN	G5E953_HUMAN
biological_process	GO:0051092	positive regulation of NF-kappaB transcription factor activity	37	180	0.205556	0.805016	0.250687	1	1	RO52_HUMAN	PSA6_HUMAN	TRI25_HUMAN	RIPK2_HUMAN	MALT1_HUMAN	ALK_HUMAN	IRAK3_HUMAN	CLOCK_HUMAN	CAR11_HUMAN	DHX9_HUMAN	GREM1_HUMAN	EP300_HUMAN	NOD2_HUMAN	NOD1_HUMAN	RIPK1_HUMAN	RNF25_HUMAN	TE2IP_HUMAN	TNR11_HUMAN	TRIM8_HUMAN	TRI14_HUMAN	X3CL1_HUMAN	TNR27_HUMAN	TLR9_HUMAN	TLR3_HUMAN	LYRIC_HUMAN	RB6I2_HUMAN	IKKB_HUMAN	CRNN_HUMAN	IRAK1_HUMAN	BTK_HUMAN	A4_HUMAN	CLC7A_HUMAN	ARHG2_HUMAN	DDRGK_HUMAN	CAR14_HUMAN	A0A3B3IS32_HUMAN	H0Y858_HUMAN
biological_process	GO:0043410	positive regulation of MAPK cascade	36	162	0.222222	0.487539	0.558734	1	1	PELI2_HUMAN	TPO_HUMAN	ROCK2_HUMAN	HGF_HUMAN	ALK_HUMAN	ITA1_HUMAN	INSR_HUMAN	FCRL3_HUMAN	MADD_HUMAN	CTNB1_HUMAN	JCAD_HUMAN	LTOR1_HUMAN	GPR37_HUMAN	EGF_HUMAN	SOX2_HUMAN	RYK_HUMAN	ROCK1_HUMAN	LPAR3_HUMAN	PTPRC_HUMAN	X3CL1_HUMAN	VINEX_HUMAN	NTRK3_HUMAN	NTRK2_HUMAN	RET_HUMAN	TLR9_HUMAN	TAOK2_HUMAN	CSPG4_HUMAN	RAF1_HUMAN	IL6RA_HUMAN	KIBRA_HUMAN	DOK4_HUMAN	A4_HUMAN	A0A087WZL3_HUMAN	A6XND0_HUMAN	F5GX19_HUMAN	A0A0K2YUJ3_HUMAN
biological_process	GO:0000165	MAPK cascade	36	146	0.246575	0.951663	0.0577513	1	1	PLVAP_HUMAN	TNIK_HUMAN	DUS7_HUMAN	MAPK2_HUMAN	M3K3_HUMAN	DUS6_HUMAN	MEF2C_HUMAN	GRP3_HUMAN	PTN7_HUMAN	IP3KB_HUMAN	NF1_HUMAN	MEN1_HUMAN	NRG1_HUMAN	SETX_HUMAN	SCG2_HUMAN	PTN3_HUMAN	TAOK3_HUMAN	RET_HUMAN	TAOK2_HUMAN	U17L2_HUMAN	NRK_HUMAN	RAF1_HUMAN	BRAP_HUMAN	MEF2A_HUMAN	KKCC2_HUMAN	M4K4_HUMAN	MBP_HUMAN	DUS9_HUMAN	B7ZCA0_HUMAN	A0A0A0MQZ2_HUMAN	A0A2R8Y6T2_HUMAN	G3V5Z7_HUMAN	G3V295_HUMAN	F5GX11_HUMAN	A0A2R8YDS2_HUMAN	G3V3I1_HUMAN
biological_process	GO:0055085	transmembrane transport	36	196	0.183673	0.00851167	0.992911	1	1	MRP6_HUMAN	MDR1_HUMAN	B3AT_HUMAN	GP155_HUMAN	CTL5_HUMAN	MDR3_HUMAN	MRP2_HUMAN	B3A3_HUMAN	MITOS_HUMAN	MRP7_HUMAN	S47A2_HUMAN	S47A1_HUMAN	TAP2_HUMAN	TAP1_HUMAN	ABCBB_HUMAN	ABCA4_HUMAN	ACATN_HUMAN	MRP4_HUMAN	ANO3_HUMAN	ABCB6_HUMAN	ABCC8_HUMAN	ABCA2_HUMAN	ANO5_HUMAN	ANO2_HUMAN	A0A0J9YXL8_HUMAN	G3V5Z7_HUMAN	C9JHU9_HUMAN	A0A3B3IRS1_HUMAN	G3V295_HUMAN	A0A0J9YWU3_HUMAN	D6RDY9_HUMAN	E7ENX8_HUMAN	F5GX11_HUMAN	G3V3I1_HUMAN	A0A087WXK4_HUMAN	A0A3B3IS12_HUMAN
biological_process	GO:0065003	protein-containing complex assembly	35	131	0.267176	0.618489	0.402807	1	1	SHAN1_HUMAN	MAGI1_HUMAN	FANCC_HUMAN	APC_HUMAN	NFE4_HUMAN	APBA1_HUMAN	EXT1_HUMAN	GTR1_HUMAN	PML_HUMAN	KNTC1_HUMAN	KMT2A_HUMAN	PEX14_HUMAN	P53_HUMAN	MITF_HUMAN	MK67I_HUMAN	OTX2_HUMAN	MDM2_HUMAN	PRGC1_HUMAN	WASF3_HUMAN	RIMS1_HUMAN	YAP1_HUMAN	REPS2_HUMAN	PARD3_HUMAN	ZN148_HUMAN	PICAL_HUMAN	RANB9_HUMAN	ADDB_HUMAN	DLG4_HUMAN	IL2RB_HUMAN	GPAA1_HUMAN	GCP4_HUMAN	GEMI5_HUMAN	CBP_HUMAN	A0A0G2JMD7_HUMAN	A0A0D9SFA9_HUMAN
biological_process	GO:0006470	protein dephosphorylation	34	115	0.295652	0.99624	0.0057745	1	1	MTMR7_HUMAN	PTPRD_HUMAN	PTN12_HUMAN	BCL2_HUMAN	CTDP1_HUMAN	CT2NL_HUMAN	DUS16_HUMAN	PTN4_HUMAN	PTN7_HUMAN	PTN5_HUMAN	PP4R2_HUMAN	P2R3A_HUMAN	PTPRT_HUMAN	PTPRZ_HUMAN	SSH2_HUMAN	SSH1_HUMAN	PTN21_HUMAN	PTN13_HUMAN	PTN14_HUMAN	PTPRO_HUMAN	PTN3_HUMAN	PTN22_HUMAN	PTPRM_HUMAN	PTPRC_HUMAN	PTPRH_HUMAN	2A5A_HUMAN	MYPT1_HUMAN	MTMR5_HUMAN	ILKAP_HUMAN	MTMR3_HUMAN	DUS11_HUMAN	2A5D_HUMAN	DUS9_HUMAN	2A5E_HUMAN
biological_process	GO:0043161	proteasome-mediated ubiquitin-dependent protein catabolic process	34	202	0.168317	0.122738	0.898862	1	1	NF2L2_HUMAN	TOPRS_HUMAN	HECW2_HUMAN	KIF14_HUMAN	HERC2_HUMAN	CLOCK_HUMAN	HACE1_HUMAN	AREL1_HUMAN	CTNB1_HUMAN	PML_HUMAN	FAF1_HUMAN	SIR2_HUMAN	SMUF1_HUMAN	SMUF2_HUMAN	PRAM9_HUMAN	RMD5A_HUMAN	MDM2_HUMAN	NEDD4_HUMAN	UBXN1_HUMAN	RFFL_HUMAN	PRAME_HUMAN	WWP1_HUMAN	PRAM6_HUMAN	TBX21_HUMAN	UBP44_HUMAN	UBE3D_HUMAN	WWP2_HUMAN	UBE4B_HUMAN	HUWE1_HUMAN	ITCH_HUMAN	HECW1_HUMAN	DTL_HUMAN	ASB2_HUMAN	COP1_HUMAN
biological_process	GO:0045766	positive regulation of angiogenesis	33	147	0.22449	0.946309	0.0774362	1	1	NF2L2_HUMAN	HIF1A_HUMAN	HGF_HUMAN	ACVL1_HUMAN	HIPK1_HUMAN	ITAX_HUMAN	ANGP4_HUMAN	CELA1_HUMAN	EGLN_HUMAN	BRCA1_HUMAN	ERAP1_HUMAN	ANGP2_HUMAN	ANGL3_HUMAN	ANGL4_HUMAN	GREM1_HUMAN	CH3L1_HUMAN	BTG1_HUMAN	NOS3_HUMAN	SP1_HUMAN	PLAK_HUMAN	SMOC2_HUMAN	VEGFB_HUMAN	XBP1_HUMAN	TLR3_HUMAN	ZC12A_HUMAN	LYRIC_HUMAN	HIPK2_HUMAN	ECM1_HUMAN	CY24B_HUMAN	CD34_HUMAN	EMIL2_HUMAN	E5RJU9_HUMAN	H0YBJ8_HUMAN
biological_process	GO:0043524	negative regulation of neuron apoptotic process	33	140	0.235714	0.972847	0.0421443	1	1	PK3CA_HUMAN	I27RA_HUMAN	ANGP1_HUMAN	BCL2_HUMAN	KIF14_HUMAN	DLX1_HUMAN	BIRC1_HUMAN	CPEB4_HUMAN	MEF2C_HUMAN	PCDGM_HUMAN	OXR1_HUMAN	NCHL1_HUMAN	NEST_HUMAN	KDM2B_HUMAN	SNX6_HUMAN	SYGP1_HUMAN	SIX4_HUMAN	RETR1_HUMAN	PTPRZ_HUMAN	PRGC1_HUMAN	ROCK1_HUMAN	XRCC2_HUMAN	VEGFB_HUMAN	TOX3_HUMAN	UFO_HUMAN	NTRK2_HUMAN	UNC5B_HUMAN	AP2B_HUMAN	IL6RB_HUMAN	HIPK2_HUMAN	ALKB1_HUMAN	B2CL1_HUMAN	ADNP_HUMAN
biological_process	GO:0090630	activation of GTPase activity	33	127	0.259843	0.987636	0.0209123	1	1	SI1L1_HUMAN	TIAM2_HUMAN	RUND1_HUMAN	SGSM2_HUMAN	SGSM3_HUMAN	APCL_HUMAN	GMIP_HUMAN	CCL21_HUMAN	EVI5L_HUMAN	ARHGQ_HUMAN	EVI5_HUMAN	GRP1_HUMAN	BCR_HUMAN	RLGPB_HUMAN	RHG25_HUMAN	RGPA2_HUMAN	US6NL_HUMAN	TBD2B_HUMAN	TBCD4_HUMAN	TBCD8_HUMAN	UBP6_HUMAN	NTRK3_HUMAN	RGRF1_HUMAN	TBD2A_HUMAN	TBC8B_HUMAN	TSC1_HUMAN	CC125_HUMAN	ARHGG_HUMAN	ARHG5_HUMAN	ABR_HUMAN	E9PKT1_HUMAN	E9PMZ8_HUMAN	A0A2R8YFR7_HUMAN
biological_process	GO:0030336	negative regulation of cell migration	32	120	0.266667	0.971304	0.0400265	1	1	PLXB3_HUMAN	PKCB1_HUMAN	SRGP2_HUMAN	STK24_HUMAN	GTPB4_HUMAN	ACVL1_HUMAN	KANK1_HUMAN	EPIPL_HUMAN	K1C16_HUMAN	BCL2_HUMAN	EGLN_HUMAN	ARID2_HUMAN	BRE1A_HUMAN	LIMC1_HUMAN	OSBL8_HUMAN	MITF_HUMAN	NF1_HUMAN	PTPRT_HUMAN	TNR16_HUMAN	SRF_HUMAN	ROBO1_HUMAN	TGO1_HUMAN	RHG04_HUMAN	PI5L1_HUMAN	X3CL1_HUMAN	RECK_HUMAN	TBX5_HUMAN	FOXO3_HUMAN	NAV3_HUMAN	CNN2_HUMAN	AFAD_HUMAN	EMIL2_HUMAN
biological_process	GO:0006457	protein folding	31	304	0.101974	5.53828e-07	1	0	1	LMAN1_HUMAN	CD37L_HUMAN	ENPL_HUMAN	FKBP4_HUMAN	DNJC1_HUMAN	MKKS_HUMAN	PDIA4_HUMAN	PPIL2_HUMAN	PPIL1_HUMAN	LTBP4_HUMAN	TBCD_HUMAN	TCPH_HUMAN	RBP2_HUMAN	AHSA1_HUMAN	BAG3_HUMAN	NFYC_HUMAN	NGLY1_HUMAN	DNJA3_HUMAN	ATF6A_HUMAN	A0A7P0TAE1_HUMAN	A0A7P0TB19_HUMAN	A0A7P0T823_HUMAN	H0YIV0_HUMAN	A0A7P0TAT8_HUMAN	A0A7P0TA15_HUMAN	A0A087WT78_HUMAN	A0A7P0T917_HUMAN	F5H300_HUMAN	A0A7P0Z4K4_HUMAN	A0A7P0TAH4_HUMAN	A0A7P0T8E8_HUMAN
biological_process	GO:0051897	positive regulation of protein kinase B signaling	31	120	0.258333	0.984251	0.0265519	1	1	PI3R5_HUMAN	PK3CA_HUMAN	TPO_HUMAN	LRP2_HUMAN	MAZ_HUMAN	HCLS1_HUMAN	ANGP1_HUMAN	INSR_HUMAN	CCL21_HUMAN	EGLN_HUMAN	CH3L1_HUMAN	HAX1_HUMAN	EGF_HUMAN	OSBL8_HUMAN	PK3CG_HUMAN	NRG1_HUMAN	STOX1_HUMAN	SPY2_HUMAN	VEGFB_HUMAN	XBP1_HUMAN	TF7L2_HUMAN	X3CL1_HUMAN	UFO_HUMAN	RET_HUMAN	TSYL5_HUMAN	LYRIC_HUMAN	CASS4_HUMAN	HIP1_HUMAN	MYOC_HUMAN	A4_HUMAN	CSF3_HUMAN
biological_process	GO:0050852	T cell receptor signaling pathway	31	159	0.194969	0.673492	0.393648	1	1	PDE4B_HUMAN	PDE4D_HUMAN	PK3CA_HUMAN	RIPK2_HUMAN	MALT1_HUMAN	HLAA_HUMAN	BCAR1_HUMAN	CD8A_HUMAN	FYB2_HUMAN	FCHO1_HUMAN	SHIP1_HUMAN	PTN22_HUMAN	PTPRC_HUMAN	THMS2_HUMAN	WNK1_HUMAN	ZN683_HUMAN	TXK_HUMAN	ZC12A_HUMAN	RC3H1_HUMAN	RC3H2_HUMAN	IKKB_HUMAN	FYB1_HUMAN	ABL1_HUMAN	EI2BD_HUMAN	G3V5Z7_HUMAN	G3V295_HUMAN	F5GX11_HUMAN	A0A075B788_HUMAN	G3V3I1_HUMAN	A0A0G2JNW2_HUMAN	A0A0B4J1S7_HUMAN
biological_process	GO:0030199	collagen fibril organization	31	106	0.292453	0.997559	0.00472727	1	1	ATS2_HUMAN	EXT1_HUMAN	GREM1_HUMAN	ATS7_HUMAN	NF1_HUMAN	TGFB2_HUMAN	PXDN_HUMAN	TENX_HUMAN	ATS12_HUMAN	ATS14_HUMAN	CO1A2_HUMAN	CO5A2_HUMAN	A0A140T9C0_HUMAN	F5H3Q5_HUMAN	C9J7W4_HUMAN	A8MXH5_HUMAN	H0YMF1_HUMAN	F5H851_HUMAN	A0A140TA33_HUMAN	F8WDM8_HUMAN	Q5T1U7_HUMAN	A0A140TA41_HUMAN	A0A3B3ISX9_HUMAN	A0A140T902_HUMAN	A6NCT7_HUMAN	A0A140TA52_HUMAN	A0A140T8Y3_HUMAN	A0A140T956_HUMAN	A0A087X0K0_HUMAN	A0A087WZY5_HUMAN	A0A087WWA5_HUMAN
biological_process	GO:0042742	defense response to bacterium	31	250	0.124	0.00735403	0.995017	1	1	TMF1_HUMAN	NLRP1_HUMAN	TRBC1_HUMAN	TRBC2_HUMAN	COL12_HUMAN	LYST_HUMAN	IGLL1_HUMAN	IRF8_HUMAN	MPEG1_HUMAN	IGHA1_HUMAN	GNLY_HUMAN	CMGA_HUMAN	BIRC1_HUMAN	IGHA2_HUMAN	GSDMB_HUMAN	GSDMD_HUMAN	LALBA_HUMAN	NOD2_HUMAN	NOD1_HUMAN	NOS2_HUMAN	OAS3_HUMAN	RN213_HUMAN	SUH_HUMAN	TLR9_HUMAN	TLR3_HUMAN	IGHD_HUMAN	IGHE_HUMAN	ISG15_HUMAN	A0A0A0MTR7_HUMAN	H0YDW8_HUMAN	B4E3H9_HUMAN
biological_process	GO:0005975	carbohydrate metabolic process	30	376	0.0797872	7.7921e-14	1	0	1	4F2_HUMAN	INSR_HUMAN	CH3L1_HUMAN	GTR3_HUMAN	SLC31_HUMAN	SPT20_HUMAN	TPD54_HUMAN	SHPK_HUMAN	UEVLD_HUMAN	POMT1_HUMAN	XYLB_HUMAN	LCTL_HUMAN	B4GT3_HUMAN	H0YG20_HUMAN	H3BU66_HUMAN	A0A0U1RRL8_HUMAN	A0A7P0Z4P5_HUMAN	H0YGV7_HUMAN	A0A0J9YX77_HUMAN	A0A3B3IS07_HUMAN	B8ZZK1_HUMAN	C9JBK3_HUMAN	E7ESZ6_HUMAN	A0A087X0R9_HUMAN	H3BUG1_HUMAN	A0A0B4J2A0_HUMAN	J3KPF3_HUMAN	H0YI64_HUMAN	A0A0J9YVZ3_HUMAN	H3BN01_HUMAN
biological_process	GO:0051091	positive regulation of DNA-binding transcription factor activity	29	119	0.243697	0.991435	0.0124331	1	1	RO52_HUMAN	TRI25_HUMAN	TP53B_HUMAN	LRP5_HUMAN	LRP6_HUMAN	HCLS1_HUMAN	CTNB1_HUMAN	DDX58_HUMAN	ESR2_HUMAN	PRGC2_HUMAN	EP300_HUMAN	PLAK_HUMAN	SP100_HUMAN	TFE2_HUMAN	SRF_HUMAN	STING_HUMAN	PRGC1_HUMAN	TNR11_HUMAN	TRIM8_HUMAN	TRI14_HUMAN	WNT2_HUMAN	ATF2_HUMAN	MYCD_HUMAN	HIPK2_HUMAN	JMY_HUMAN	A4_HUMAN	ARHG5_HUMAN	CLC7A_HUMAN	CSF3_HUMAN
biological_process	GO:0016525	negative regulation of angiogenesis	29	113	0.256637	0.9915	0.0148128	1	1	PGBM_HUMAN	PDE3B_HUMAN	SEM4A_HUMAN	ROCK2_HUMAN	HGS_HUMAN	ECSCR_HUMAN	HHEX_HUMAN	ANGP4_HUMAN	CCR2_HUMAN	AGRB1_HUMAN	CTNB1_HUMAN	ANGP2_HUMAN	MNAR1_HUMAN	PML_HUMAN	FOXJ2_HUMAN	FOXO4_HUMAN	NF1_HUMAN	SPY2_HUMAN	ROCK1_HUMAN	TGFB2_HUMAN	PTPRM_HUMAN	AGRB3_HUMAN	ATF2_HUMAN	BY55_HUMAN	ABCC8_HUMAN	AT2B4_HUMAN	AMOT_HUMAN	E5RG74_HUMAN	A0A2R8Y5M7_HUMAN
biological_process	GO:0071222	cellular response to lipopolysaccharide	29	166	0.174699	0.353573	0.712212	1	1	PDE4B_HUMAN	TPO_HUMAN	TNIP3_HUMAN	RENT1_HUMAN	IRF8_HUMAN	LIRB2_HUMAN	ATS13_HUMAN	CATIN_HUMAN	MEF2C_HUMAN	PAF1_HUMAN	BCR_HUMAN	NOD2_HUMAN	CDK19_HUMAN	NOS2_HUMAN	PRP8_HUMAN	SHPK_HUMAN	TNR1B_HUMAN	XBP1_HUMAN	UFO_HUMAN	TNAP3_HUMAN	ZC12A_HUMAN	NR1D1_HUMAN	LIRB1_HUMAN	IRAK1_HUMAN	BPI_HUMAN	CSF3_HUMAN	ABL1_HUMAN	CAR17_HUMAN	CD68_HUMAN
biological_process	GO:0006364	rRNA processing	29	180	0.161111	0.29069	0.75838	1	1	REXO4_HUMAN	NOL8_HUMAN	DDX21_HUMAN	DDX47_HUMAN	CHD7_HUMAN	DDX17_HUMAN	ESF1_HUMAN	NOP14_HUMAN	PAPD5_HUMAN	UT14A_HUMAN	UT14C_HUMAN	RRP1_HUMAN	MDN1_HUMAN	WBP11_HUMAN	WDR75_HUMAN	GEMI4_HUMAN	DDX27_HUMAN	DDX10_HUMAN	A0A7I2V653_HUMAN	A0A7I2V3Q3_HUMAN	E5RGP0_HUMAN	A0A7I2V3R6_HUMAN	Q5T3Q7_HUMAN	A0A7I2YQI7_HUMAN	A0A7I2V5R7_HUMAN	J3KNP2_HUMAN	X6RJY0_HUMAN	A0A7I2V4E5_HUMAN	I3L2C7_HUMAN
biological_process	GO:0035264	multicellular organism growth	29	89	0.325843	0.998652	0.00242133	1	1	TNS2_HUMAN	PKHA1_HUMAN	GRHL2_HUMAN	HEG1_HUMAN	CELA1_HUMAN	APBA1_HUMAN	ERCC6_HUMAN	EXT1_HUMAN	EP300_HUMAN	GGYF2_HUMAN	P53_HUMAN	SPTN2_HUMAN	RMI1_HUMAN	SP2_HUMAN	STIL_HUMAN	PALB2_HUMAN	TTC8_HUMAN	WWTR1_HUMAN	XRCC2_HUMAN	PLAG1_HUMAN	RC3H2_HUMAN	RBBP6_HUMAN	KAT2A_HUMAN	ATM_HUMAN	A0A0A0MSU3_HUMAN	A0A1B0GVH1_HUMAN	Q9BRW5_HUMAN	A0A087X0R0_HUMAN	X6RAN8_HUMAN
biological_process	GO:0007568	aging	28	145	0.193103	0.93009	0.0910535	1	1	PAX2_HUMAN	RPN2_HUMAN	NF2L2_HUMAN	GABT_HUMAN	ELAV4_HUMAN	K1C16_HUMAN	HTRA2_HUMAN	K1C14_HUMAN	KT33B_HUMAN	DNMBP_HUMAN	FOXO4_HUMAN	SIN3A_HUMAN	S12A2_HUMAN	SRBP1_HUMAN	SCAP_HUMAN	WRN_HUMAN	TNR1B_HUMAN	X3CL1_HUMAN	ACE_HUMAN	AMFR_HUMAN	FOXO3_HUMAN	IC1_HUMAN	IRAK1_HUMAN	MBP_HUMAN	CD68_HUMAN	CTNA1_HUMAN	A0A075B6G3_HUMAN	A0A0B4J1S1_HUMAN
biological_process	GO:0051028	mRNA transport	28	115	0.243478	0.877362	0.159599	1	1	RBP17_HUMAN	SENP2_HUMAN	SPT6H_HUMAN	LUZP4_HUMAN	KIF5C_HUMAN	ELYS_HUMAN	DHX9_HUMAN	FUBP2_HUMAN	PO210_HUMAN	NU205_HUMAN	P121C_HUMAN	MX2_HUMAN	NUP62_HUMAN	NUP98_HUMAN	P121B_HUMAN	XPO1_HUMAN	P121A_HUMAN	NUP54_HUMAN	RBP2_HUMAN	IF2B2_HUMAN	NU153_HUMAN	NU188_HUMAN	NDC1_HUMAN	J3KRC0_HUMAN	A0A3B3ITD8_HUMAN	J3KT10_HUMAN	F8W930_HUMAN	J3KSH3_HUMAN
biological_process	GO:0007517	muscle organ development	28	115	0.243478	0.993059	0.00982312	1	1	UTRN_HUMAN	NEBU_HUMAN	HTF4_HUMAN	LMNA_HUMAN	FOXK1_HUMAN	ETV1_HUMAN	AGRB1_HUMAN	CENPF_HUMAN	COPRS_HUMAN	PAX7_HUMAN	MEF2C_HUMAN	LAMA5_HUMAN	FOXO4_HUMAN	MYH3_HUMAN	PAXB1_HUMAN	PO6F1_HUMAN	MRTFB_HUMAN	TCF23_HUMAN	XBP1_HUMAN	ZN609_HUMAN	ZFHX3_HUMAN	UBP2_HUMAN	MEF2A_HUMAN	MEF2D_HUMAN	CHD2_HUMAN	CO6A3_HUMAN	DMD_HUMAN	EVC_HUMAN
biological_process	GO:0006813	potassium ion transport	28	111	0.252252	0.991436	0.0125734	1	1	KCNV1_HUMAN	CDN1B_HUMAN	KCNH3_HUMAN	KCNKH_HUMAN	TSC1_HUMAN	ABCC8_HUMAN	A0A2R8Y6Q0_HUMAN	A0A2R8YD94_HUMAN	A0A2R8Y5D8_HUMAN	A0A2R8Y3M7_HUMAN	A0A2R8Y698_HUMAN	A0A2R8Y5V4_HUMAN	A0A2R8Y4Z4_HUMAN	A0A2R8Y475_HUMAN	A0A2R8YFU3_HUMAN	E9PK50_HUMAN	A0A2R8Y4V0_HUMAN	A0A2R8YDG6_HUMAN	A0A2R8YDX3_HUMAN	A0A2R8Y7I1_HUMAN	A0A2R8Y6I7_HUMAN	A0A2R8YFB3_HUMAN	A0A2R8YEE5_HUMAN	A0A2R8YDG0_HUMAN	A0A2R8YCG4_HUMAN	A0A2R8Y5X1_HUMAN	A0A2R8Y781_HUMAN	A0A2R8Y6B7_HUMAN
biological_process	GO:0090263	positive regulation of canonical Wnt signaling pathway	27	151	0.178808	0.556254	0.527124	1	1	PKHA4_HUMAN	TT21B_HUMAN	KANK1_HUMAN	HHEX_HUMAN	DACT1_HUMAN	CAPR2_HUMAN	EGF_HUMAN	PRD15_HUMAN	SMUF2_HUMAN	P2R3A_HUMAN	PLAK_HUMAN	DLX5_HUMAN	WNK2_HUMAN	UBP34_HUMAN	PO5F1_HUMAN	YAP1_HUMAN	PIN1_HUMAN	WNK1_HUMAN	RECK_HUMAN	UBR5_HUMAN	ASPM_HUMAN	NRARP_HUMAN	AMER1_HUMAN	G3V5Z7_HUMAN	G3V295_HUMAN	F5GX11_HUMAN	G3V3I1_HUMAN
biological_process	GO:0046856	phosphatidylinositol dephosphorylation	27	98	0.27551	0.994574	0.0103331	1	1	MTMR7_HUMAN	SYNJ1_HUMAN	FIG4_HUMAN	MTMR8_HUMAN	SAC2_HUMAN	SHIP1_HUMAN	SHIP2_HUMAN	OCRL_HUMAN	MTMR3_HUMAN	A0A6Q8PG59_HUMAN	A0A0A0MTP6_HUMAN	A0A6Q8PHH5_HUMAN	A0A0D9SGJ6_HUMAN	A0A2R8YG38_HUMAN	A0A6Q8PGW0_HUMAN	A0A6Q8PF27_HUMAN	A0A6Q8PHC7_HUMAN	A0A6Q8PGY4_HUMAN	A0A6Q8PGW5_HUMAN	A0A6Q8PF70_HUMAN	J3KQV8_HUMAN	H0Y5Q9_HUMAN	A0A6Q8PHP5_HUMAN	A0A6Q8PGP4_HUMAN	A0A6Q8PGY7_HUMAN	H0Y6G7_HUMAN	A0A6Q8PF62_HUMAN
biological_process	GO:0001649	osteoblast differentiation	26	116	0.224138	0.927312	0.0978667	1	1	RUNX2_HUMAN	RRBP1_HUMAN	GTPB4_HUMAN	CSPG2_HUMAN	DDX21_HUMAN	DSRAD_HUMAN	BAP29_HUMAN	DJC13_HUMAN	DHX9_HUMAN	CR3L1_HUMAN	MEF2C_HUMAN	MBB1A_HUMAN	FAS_HUMAN	FIGL1_HUMAN	NF1_HUMAN	SOX2_HUMAN	WWTR1_HUMAN	DLX5_HUMAN	U520_HUMAN	UFL1_HUMAN	MYOC_HUMAN	MEF2D_HUMAN	HIRA_HUMAN	GLI1_HUMAN	GLI2_HUMAN	A6XND0_HUMAN
biological_process	GO:0048511	rhythmic process	26	142	0.183099	0.979307	0.0277314	1	1	ROCK2_HUMAN	MAGL2_HUMAN	CRTC1_HUMAN	KDM5B_HUMAN	DHX9_HUMAN	KAT2B_HUMAN	NMD3A_HUMAN	SIK1_HUMAN	SIN3A_HUMAN	SP1_HUMAN	PRKDC_HUMAN	TADBP_HUMAN	USP9X_HUMAN	NFYA_HUMAN	DDX5_HUMAN	DTL_HUMAN	CBP_HUMAN	E7EQX7_HUMAN	A0A0G2JLI4_HUMAN	J3KTA4_HUMAN	J3KRL7_HUMAN	J3KP33_HUMAN	S4R334_HUMAN	E7EMR6_HUMAN	A0A669KB12_HUMAN	E9PCY9_HUMAN
biological_process	GO:0046330	positive regulation of JNK cascade	26	100	0.26	0.978611	0.0368049	1	1	PJA2_HUMAN	TNIK_HUMAN	RIPK2_HUMAN	JIP1_HUMAN	CCL21_HUMAN	DIXC1_HUMAN	NCF1_HUMAN	ANKR6_HUMAN	BIRC1_HUMAN	GRP1_HUMAN	M4K2_HUMAN	NOD2_HUMAN	NOD1_HUMAN	RIPK1_HUMAN	SH3R1_HUMAN	UN5CL_HUMAN	TNR27_HUMAN	TAOK3_HUMAN	TLR9_HUMAN	TAOK2_HUMAN	TLR3_HUMAN	TNR19_HUMAN	RBCC1_HUMAN	HIPK2_HUMAN	A4_HUMAN	EFC4B_HUMAN
biological_process	GO:0045732	positive regulation of protein catabolic process	26	79	0.329114	0.998524	0.00239848	1	1	SGSM3_HUMAN	APCL_HUMAN	CDN1B_HUMAN	HECW2_HUMAN	APC_HUMAN	DACT1_HUMAN	HACE1_HUMAN	AREL1_HUMAN	FZR1_HUMAN	CRERF_HUMAN	SMUF1_HUMAN	SMUF2_HUMAN	P2R3A_HUMAN	OAZ2_HUMAN	NEDD4_HUMAN	PARPT_HUMAN	WWP1_HUMAN	TNAP3_HUMAN	ZN268_HUMAN	WWP2_HUMAN	HUWE1_HUMAN	ITCH_HUMAN	HECW1_HUMAN	DTL_HUMAN	ASB5_HUMAN	GGA3_HUMAN
biological_process	GO:0006396	RNA processing	26	154	0.168831	0.254637	0.765293	1	1	RBM5_HUMAN	RBM6_HUMAN	RBMS2_HUMAN	RED2_HUMAN	RM44_HUMAN	LARP6_HUMAN	DDX20_HUMAN	DSRAD_HUMAN	ELAV4_HUMAN	DDX17_HUMAN	DHX8_HUMAN	SETX_HUMAN	TFP11_HUMAN	TDIF2_HUMAN	ATX1_HUMAN	HNRL1_HUMAN	DUS11_HUMAN	CELF2_HUMAN	BICD1_HUMAN	A0A3B3ISU1_HUMAN	A0A499FI31_HUMAN	A0A0A0MRA5_HUMAN	E9PI41_HUMAN	A0A3B3IRQ9_HUMAN	B7Z4B8_HUMAN	A0A7P0Z4K3_HUMAN
biological_process	GO:0031647	regulation of protein stability	26	90	0.288889	0.996777	0.00483442	1	1	LMNA_HUMAN	ANK2_HUMAN	AURKA_HUMAN	BCL2_HUMAN	HDAC6_HUMAN	DACT1_HUMAN	APOA2_HUMAN	CARF_HUMAN	DDI2_HUMAN	DDI1_HUMAN	MCAF1_HUMAN	SRBP1_HUMAN	TADBP_HUMAN	TIF1A_HUMAN	OST48_HUMAN	PIN1_HUMAN	UBP19_HUMAN	XBP1_HUMAN	UBP36_HUMAN	UBP28_HUMAN	VPS11_HUMAN	KAT2A_HUMAN	APTX_HUMAN	GGA3_HUMAN	AGRV1_HUMAN	DDRGK_HUMAN
biological_process	GO:0032760	positive regulation of tumor necrosis factor production	26	99	0.262626	0.981176	0.0327967	1	1	TNR8_HUMAN	RIPK2_HUMAN	MAPK2_HUMAN	CCR2_HUMAN	DHX9_HUMAN	DDX58_HUMAN	GRP1_HUMAN	NOD2_HUMAN	NOD1_HUMAN	P85A_HUMAN	OAS3_HUMAN	RIPK1_HUMAN	TLR1_HUMAN	PTPRC_HUMAN	TLR9_HUMAN	TLR3_HUMAN	ZBT20_HUMAN	IL23A_HUMAN	IFNG_HUMAN	ABCC8_HUMAN	A4_HUMAN	CLC7A_HUMAN	AKA12_HUMAN	CD2_HUMAN	CY24B_HUMAN	ARHG2_HUMAN
biological_process	GO:0042632	cholesterol homeostasis	25	92	0.271739	0.986748	0.0241656	1	1	HDAC9_HUMAN	LRP5_HUMAN	MALR1_HUMAN	APOB_HUMAN	APOA1_HUMAN	APOA2_HUMAN	ANGL3_HUMAN	LTOR1_HUMAN	NR1H2_HUMAN	LDLR_HUMAN	MED13_HUMAN	SRBP2_HUMAN	SC24A_HUMAN	XBP1_HUMAN	NF2L1_HUMAN	NR1D1_HUMAN	ABCA5_HUMAN	ABCBB_HUMAN	ASTRB_HUMAN	LIPE_HUMAN	LIPC_HUMAN	ABCA2_HUMAN	APOA4_HUMAN	A0A1B0GUD6_HUMAN	F5GX19_HUMAN
biological_process	GO:0034599	cellular response to oxidative stress	25	103	0.242718	0.956144	0.0589855	1	1	NF2L2_HUMAN	FANCC_HUMAN	HTRA2_HUMAN	FACD2_HUMAN	MSRA_HUMAN	SIR2_HUMAN	SETX_HUMAN	PNPT1_HUMAN	STX4_HUMAN	STAU1_HUMAN	PRGC1_HUMAN	VRK2_HUMAN	XBP1_HUMAN	NF2L1_HUMAN	ZC12A_HUMAN	RAD52_HUMAN	AT132_HUMAN	ATF2_HUMAN	FOXO3_HUMAN	KEAP1_HUMAN	BRF2_HUMAN	ABL1_HUMAN	J9JIE5_HUMAN	J3QQY8_HUMAN	J3QLQ1_HUMAN
biological_process	GO:0033138	positive regulation of peptidyl-serine phosphorylation	25	90	0.277778	0.978625	0.0360434	1	1	PK3CA_HUMAN	RIPK2_HUMAN	HCLS1_HUMAN	ANGP1_HUMAN	BCL2_HUMAN	HDAC6_HUMAN	CAPR2_HUMAN	FNIP2_HUMAN	HAX1_HUMAN	SIN1_HUMAN	STOX1_HUMAN	STK4_HUMAN	TB182_HUMAN	SPY2_HUMAN	TE2IP_HUMAN	TEN1_HUMAN	UCN1_HUMAN	NTRK3_HUMAN	NTRK2_HUMAN	RAF1_HUMAN	IF4G1_HUMAN	A4_HUMAN	AKAP9_HUMAN	CSF3_HUMAN	AT2B4_HUMAN
biological_process	GO:0007179	transforming growth factor beta receptor signaling pathway	25	115	0.217391	0.947119	0.0726878	1	1	TAB1_HUMAN	LRC32_HUMAN	LTBP2_HUMAN	ACVL1_HUMAN	EGLN_HUMAN	PML_HUMAN	NLK_HUMAN	P53_HUMAN	LTBP3_HUMAN	SKIL_HUMAN	USP9X_HUMAN	LTBP4_HUMAN	TGFB2_HUMAN	TGFA1_HUMAN	TGBR3_HUMAN	ZYX_HUMAN	USP9Y_HUMAN	ZMIZ1_HUMAN	ZFYV9_HUMAN	DP13B_HUMAN	FUT8_HUMAN	HIPK2_HUMAN	ACVR1_HUMAN	CO1A2_HUMAN	AMHR2_HUMAN
biological_process	GO:0032755	positive regulation of interleukin-6 production	25	97	0.257732	0.974221	0.044019	1	1	RIPK2_HUMAN	LIRB2_HUMAN	DHX9_HUMAN	DDX58_HUMAN	NOD2_HUMAN	NOD1_HUMAN	NOS2_HUMAN	SIG16_HUMAN	TLR1_HUMAN	PO2F2_HUMAN	UCN1_HUMAN	XBP1_HUMAN	TLR9_HUMAN	TLR3_HUMAN	ZBT20_HUMAN	TSLP_HUMAN	NAL10_HUMAN	IL16_HUMAN	IL6RA_HUMAN	IFNG_HUMAN	MBP_HUMAN	A4_HUMAN	CLC7A_HUMAN	ARHG2_HUMAN	H0Y858_HUMAN
biological_process	GO:0006898	receptor-mediated endocytosis	24	97	0.247423	0.988296	0.0167213	1	1	PGBM_HUMAN	TM108_HUMAN	LRP2_HUMAN	LRP3_HUMAN	LRP1_HUMAN	AP2A2_HUMAN	MPRI_HUMAN	LRAD3_HUMAN	HIP1R_HUMAN	AP4E1_HUMAN	INSR_HUMAN	ITAM_HUMAN	DJC13_HUMAN	GAK_HUMAN	LDLR_HUMAN	SRC8_HUMAN	TFR2_HUMAN	RHG27_HUMAN	DAB2_HUMAN	PICAL_HUMAN	AP1G1_HUMAN	CLC9A_HUMAN	ASGR1_HUMAN	E9PMG1_HUMAN
biological_process	GO:0001933	negative regulation of protein phosphorylation	24	76	0.315789	0.998392	0.0024583	1	1	SH3G2_HUMAN	LRP6_HUMAN	JIP4_HUMAN	ANGP1_HUMAN	CATIN_HUMAN	DUS6_HUMAN	KIRR1_HUMAN	PAX6_HUMAN	PR15B_HUMAN	MEN1_HUMAN	NIBA1_HUMAN	PRKDC_HUMAN	TADBP_HUMAN	WWTR1_HUMAN	PI5L1_HUMAN	TE2IP_HUMAN	PTN13_HUMAN	XDH_HUMAN	NTRK3_HUMAN	ZC12A_HUMAN	BAKOR_HUMAN	IBP3_HUMAN	IBTK_HUMAN	CADM4_HUMAN
biological_process	GO:0032496	response to lipopolysaccharide	24	134	0.179104	0.249907	0.794274	1	1	PE2R2_HUMAN	PE2R4_HUMAN	PI2R_HUMAN	TAB2_HUMAN	MAPK2_HUMAN	ERBIN_HUMAN	IRAK3_HUMAN	NOTC1_HUMAN	APOB_HUMAN	I18BP_HUMAN	NOS2_HUMAN	NOS3_HUMAN	NEC1_HUMAN	TNR11_HUMAN	PTN22_HUMAN	TNFB_HUMAN	RENI_HUMAN	ACE_HUMAN	CPSM_HUMAN	IRAK1_HUMAN	ABCC8_HUMAN	GGT5_HUMAN	AKA12_HUMAN	A0A087X0K9_HUMAN
biological_process	GO:0006936	muscle contraction	24	111	0.216216	0.57949	0.471413	1	1	UTRN_HUMAN	MYH4_HUMAN	TRI63_HUMAN	TITIN_HUMAN	LMOD2_HUMAN	MYH2_HUMAN	MYH1_HUMAN	P2RX6_HUMAN	SCN7A_HUMAN	SLMAP_HUMAN	MYH6_HUMAN	MYH7_HUMAN	MYH8_HUMAN	MYH13_HUMAN	MYOF_HUMAN	MYOM1_HUMAN	MYOM2_HUMAN	MYOTI_HUMAN	A0A5F9VB99_HUMAN	A0A590UJT5_HUMAN	A0A590UJG7_HUMAN	A0A590UJ16_HUMAN	A0A590UJK3_HUMAN	A0A590UJU9_HUMAN
biological_process	GO:0030324	lung development	24	82	0.292683	0.998376	0.00281368	1	1	TAB1_HUMAN	SP3_HUMAN	LICH_HUMAN	HEG1_HUMAN	ATS2_HUMAN	NOTC1_HUMAN	FOG2_HUMAN	ITA3_HUMAN	EPAS1_HUMAN	CH3L1_HUMAN	HIKES_HUMAN	EP300_HUMAN	LAMA5_HUMAN	NOS3_HUMAN	SRBP1_HUMAN	TBX4_HUMAN	WNT2_HUMAN	TIM_HUMAN	TBX5_HUMAN	GLI1_HUMAN	GLI2_HUMAN	GLI3_HUMAN	CCD40_HUMAN	A0A7I2PJA1_HUMAN
biological_process	GO:0007267	cell-cell signaling	24	237	0.101266	0.755582	0.262916	1	1	PI2R_HUMAN	SH3K1_HUMAN	FAT1_HUMAN	LIRB2_HUMAN	CCL21_HUMAN	KLF10_HUMAN	GREM1_HUMAN	ESR2_HUMAN	LALBA_HUMAN	NEC1_HUMAN	SSR3_HUMAN	PRGR_HUMAN	SEM3B_HUMAN	TNR11_HUMAN	PKP4_HUMAN	X3CL1_HUMAN	ZYX_HUMAN	WNT2_HUMAN	TNFB_HUMAN	TBX5_HUMAN	AP2C_HUMAN	FGFP1_HUMAN	AGRG1_HUMAN	AFAD_HUMAN
biological_process	GO:0007005	mitochondrion organization	24	104	0.230769	0.0110604	0.991668	1	1	HTRA2_HUMAN	CNTP1_HUMAN	EPAS1_HUMAN	MIRO1_HUMAN	NOS3_HUMAN	RAB32_HUMAN	PRGC1_HUMAN	MTX2_HUMAN	VP13D_HUMAN	VP13C_HUMAN	KIF28_HUMAN	MA2A1_HUMAN	CEP89_HUMAN	CLU_HUMAN	DNJA3_HUMAN	H7BXZ6_HUMAN	A0A087WTJ3_HUMAN	K7EPU8_HUMAN	A0A494C0R8_HUMAN	I3L2B0_HUMAN	K7EQI2_HUMAN	K7EJF0_HUMAN	A0A0C4DGP8_HUMAN	A0A087WVW3_HUMAN
biological_process	GO:0050731	positive regulation of peptidyl-tyrosine phosphorylation	24	90	0.266667	0.890561	0.147543	1	1	PECA1_HUMAN	RIPK2_HUMAN	HGF_HUMAN	HCLS1_HUMAN	ANGP1_HUMAN	ANGP4_HUMAN	DGKQ_HUMAN	CNTN1_HUMAN	ITB3_HUMAN	HAX1_HUMAN	NOD2_HUMAN	P53_HUMAN	SEM4D_HUMAN	VEGFB_HUMAN	PTPRC_HUMAN	RELN_HUMAN	CSPG4_HUMAN	IL6RA_HUMAN	ACVR1_HUMAN	CLC7A_HUMAN	CSF3_HUMAN	ABL1_HUMAN	ADNP_HUMAN	ARHG2_HUMAN
biological_process	GO:0071356	cellular response to tumor necrosis factor	24	125	0.192	0.347557	0.709897	1	1	NF2L2_HUMAN	ERBIN_HUMAN	ATS13_HUMAN	CATIN_HUMAN	CCL21_HUMAN	BRCA1_HUMAN	APOB_HUMAN	DHX9_HUMAN	CRHBP_HUMAN	CH3L1_HUMAN	ATS7_HUMAN	I18BP_HUMAN	RIPK1_HUMAN	PRP8_HUMAN	X3CL1_HUMAN	ZN268_HUMAN	OCSTP_HUMAN	ZC12A_HUMAN	NR1D1_HUMAN	ATS12_HUMAN	IKKB_HUMAN	KAT2A_HUMAN	AKA12_HUMAN	ARHG2_HUMAN
biological_process	GO:0032729	positive regulation of interferon-gamma production	24	78	0.307692	0.997414	0.00556904	1	1	PDE4B_HUMAN	PDE4D_HUMAN	RIPK2_HUMAN	I27RA_HUMAN	IRF8_HUMAN	CD244_HUMAN	HLAA_HUMAN	CCR2_HUMAN	GRP1_HUMAN	SLAF6_HUMAN	TYK2_HUMAN	PTN22_HUMAN	TXK_HUMAN	TNFB_HUMAN	TLR9_HUMAN	TLR3_HUMAN	IL23A_HUMAN	LIRB1_HUMAN	BY55_HUMAN	ISG15_HUMAN	A4_HUMAN	CLC7A_HUMAN	ABL1_HUMAN	CD2_HUMAN
biological_process	GO:0016197	endosomal transport	24	90	0.266667	0.954636	0.0592391	1	1	TOM1_HUMAN	HGS_HUMAN	K1109_HUMAN	EP15R_HUMAN	AP5M1_HUMAN	LTOR1_HUMAN	EPS15_HUMAN	SQSTM_HUMAN	WASH4_HUMAN	WASC4_HUMAN	VPS16_HUMAN	REPS2_HUMAN	ZFYV9_HUMAN	PICAL_HUMAN	MYO5B_HUMAN	ALS2_HUMAN	ALMS1_HUMAN	EFC4B_HUMAN	A0A087WV20_HUMAN	A0A494C1N9_HUMAN	H7C1D9_HUMAN	F5GX19_HUMAN	A0A0A0MRI2_HUMAN	A0A087WTU9_HUMAN
biological_process	GO:0001558	regulation of cell growth	24	102	0.235294	0.968452	0.04076	1	1	MUC12_HUMAN	I17RB_HUMAN	KIF14_HUMAN	K1109_HUMAN	BCAR1_HUMAN	FOXM1_HUMAN	LTOR1_HUMAN	KAT7_HUMAN	OGFR_HUMAN	PTC2_HUMAN	SGK2_HUMAN	LTBP4_HUMAN	ROS1_HUMAN	XBP1_HUMAN	TAOK2_HUMAN	TMC8_HUMAN	RCAS1_HUMAN	CEAM1_HUMAN	ITCH_HUMAN	BAP1_HUMAN	ARHGB_HUMAN	CSTN1_HUMAN	A6XND0_HUMAN	A0A0J9YWN0_HUMAN
biological_process	GO:0050727	regulation of inflammatory response	23	95	0.242105	0.652913	0.397027	1	1	BRD4_HUMAN	NLRP1_HUMAN	PSA6_HUMAN	STK39_HUMAN	BCL6B_HUMAN	FACD2_HUMAN	MCPH1_HUMAN	CCR2_HUMAN	AREL1_HUMAN	CELF1_HUMAN	NR1D2_HUMAN	NOD2_HUMAN	PGRP2_HUMAN	DGLB_HUMAN	SHPK_HUMAN	SPAT2_HUMAN	STING_HUMAN	ZYX_HUMAN	TREX1_HUMAN	UFL1_HUMAN	ATS12_HUMAN	BAP1_HUMAN	AKNA_HUMAN
biological_process	GO:0042060	wound healing	23	92	0.25	0.974306	0.0331022	1	1	EPIPL_HUMAN	MACF1_HUMAN	EGLN_HUMAN	EXT1_HUMAN	EVPLL_HUMAN	EVPL_HUMAN	ITB3_HUMAN	NF1_HUMAN	NRG1_HUMAN	SDC1_HUMAN	TGO1_HUMAN	TGFB2_HUMAN	YAP1_HUMAN	RAF1_HUMAN	DESP_HUMAN	NACA_HUMAN	DYST_HUMAN	CNN2_HUMAN	GLI3_HUMAN	DCBD2_HUMAN	H7C1K4_HUMAN	E9PHH3_HUMAN	A0A6I8PRU0_HUMAN
biological_process	GO:0042593	glucose homeostasis	23	118	0.194915	0.970159	0.0418783	1	1	CRY1_HUMAN	MBD5_HUMAN	HECD4_HUMAN	INSR_HUMAN	DHYS_HUMAN	FBN2_HUMAN	PAX6_HUMAN	RFX6_HUMAN	SIR6_HUMAN	RMI1_HUMAN	NCOA5_HUMAN	TNR16_HUMAN	SESN3_HUMAN	USF1_HUMAN	TF7L2_HUMAN	PTC1_HUMAN	DP13B_HUMAN	AP2B_HUMAN	CRTC2_HUMAN	HNF1A_HUMAN	AGRF5_HUMAN	A0A0A0MSU3_HUMAN	A0A0A0MQU7_HUMAN
biological_process	GO:0050729	positive regulation of inflammatory response	23	97	0.237113	0.841661	0.21429	1	1	PE2R4_HUMAN	PDE2A_HUMAN	NLRP1_HUMAN	CCR2_HUMAN	CLOCK_HUMAN	DHX9_HUMAN	ITA2_HUMAN	CDK19_HUMAN	LDLR_HUMAN	RIPK1_HUMAN	STA5B_HUMAN	X3CL1_HUMAN	TLR9_HUMAN	TLR3_HUMAN	TSLP_HUMAN	NAL10_HUMAN	ACE_HUMAN	IL16_HUMAN	IL23A_HUMAN	IFNG_HUMAN	A4_HUMAN	H0Y858_HUMAN	D6RA51_HUMAN
biological_process	GO:0007219	Notch signaling pathway	23	163	0.141104	0.582591	0.483792	1	1	MINT_HUMAN	CDN1B_HUMAN	ANGP4_HUMAN	NOTC1_HUMAN	CNTN1_HUMAN	SUH_HUMAN	P63_HUMAN	IFT74_HUMAN	NRARP_HUMAN	MAML1_HUMAN	HNF1B_HUMAN	MIB1_HUMAN	MAML2_HUMAN	MAML3_HUMAN	DTX3L_HUMAN	A4_HUMAN	DTX1_HUMAN	CFA58_HUMAN	E9PG40_HUMAN	A0A7P0T8U6_HUMAN	A0A7P0TB20_HUMAN	A0A7P0TA56_HUMAN	A0A7P0T8W1_HUMAN
biological_process	GO:0042147	retrograde transport, endosome to Golgi	23	142	0.161972	0.54689	0.535027	1	1	RIC1_HUMAN	STX6_HUMAN	MAGL2_HUMAN	HTR5A_HUMAN	JIP4_HUMAN	DEN2A_HUMAN	GCC2_HUMAN	GBF1_HUMAN	FYV1_HUMAN	EVI5_HUMAN	SNX6_HUMAN	STX16_HUMAN	WASH4_HUMAN	WAC2A_HUMAN	VPS52_HUMAN	TBC23_HUMAN	VPS54_HUMAN	WAC2C_HUMAN	RB6I2_HUMAN	DEN5A_HUMAN	BAIP3_HUMAN	A0A7P0TAE0_HUMAN	E9PGE5_HUMAN
biological_process	GO:0030509	BMP signaling pathway	22	77	0.285714	0.969602	0.0457029	1	1	RUNX2_HUMAN	ACVL1_HUMAN	EGR1_HUMAN	EGLN_HUMAN	EXT1_HUMAN	FA83G_HUMAN	MEGF8_HUMAN	SMUF1_HUMAN	USP9X_HUMAN	DLX5_HUMAN	TGFB2_HUMAN	ZNF8_HUMAN	ZEP1_HUMAN	TGBR3_HUMAN	RGMA_HUMAN	USP9Y_HUMAN	ACATN_HUMAN	ATF2_HUMAN	DDX5_HUMAN	ACVR1_HUMAN	F5H7G2_HUMAN	A0A0A0MTQ4_HUMAN
biological_process	GO:0008544	epidermis development	22	82	0.268293	0.963414	0.0479453	1	1	LAMA3_HUMAN	KRT34_HUMAN	PO2F3_HUMAN	GRHL2_HUMAN	CDSN_HUMAN	INSR_HUMAN	K1C14_HUMAN	KRA59_HUMAN	K1C9_HUMAN	K1H1_HUMAN	EVPLL_HUMAN	EVPL_HUMAN	LAMB3_HUMAN	TGM5_HUMAN	XP32_HUMAN	TNR27_HUMAN	DESP_HUMAN	AT2C1_HUMAN	BNC1_HUMAN	LAMC2_HUMAN	CO7A1_HUMAN	K7EKI0_HUMAN
biological_process	GO:0007189	adenylate cyclase-activating G protein-coupled receptor signaling pathway	22	142	0.15493	0.229685	0.826962	1	1	PE2R2_HUMAN	PE2R4_HUMAN	PI2R_HUMAN	AGRG4_HUMAN	AGRB1_HUMAN	GP157_HUMAN	RPGF4_HUMAN	TM116_HUMAN	LPAR3_HUMAN	AGRL1_HUMAN	AGRB3_HUMAN	A4_HUMAN	AGRG1_HUMAN	ADCY9_HUMAN	AGRL2_HUMAN	AGRE4_HUMAN	AGRE3_HUMAN	AGRF1_HUMAN	AGRG5_HUMAN	ADCY3_HUMAN	ADCY5_HUMAN	AGRL3_HUMAN
biological_process	GO:0070374	positive regulation of ERK1 and ERK2 cascade	22	214	0.102804	0.00127123	0.999362	0.818	1	TPO_HUMAN	RIPK2_HUMAN	M3K12_HUMAN	ANGP1_HUMAN	NOTC1_HUMAN	CCL21_HUMAN	CH3L1_HUMAN	GRP1_HUMAN	NOD2_HUMAN	NOD1_HUMAN	NRG1_HUMAN	SPY2_HUMAN	VEGFB_HUMAN	PTN22_HUMAN	PTPRC_HUMAN	X3CL1_HUMAN	DEN2B_HUMAN	ICAM1_HUMAN	A4_HUMAN	ABL1_HUMAN	AKA12_HUMAN	A0A0B4J1S7_HUMAN
biological_process	GO:0007286	spermatid development	22	103	0.213592	0.967791	0.0467013	1	1	RIM3C_HUMAN	KLC3_HUMAN	MEIOC_HUMAN	BBS4_HUMAN	FND3A_HUMAN	NSUN2_HUMAN	ING2_HUMAN	ODFP2_HUMAN	SYCP3_HUMAN	MKKS_HUMAN	RIM3B_HUMAN	RIM3A_HUMAN	SMCA2_HUMAN	RNF8_HUMAN	UB2J1_HUMAN	TSSK4_HUMAN	YTDC2_HUMAN	TDRD5_HUMAN	P_HUMAN	AFF4_HUMAN	MTMR5_HUMAN	EHMT2_HUMAN
biological_process	GO:0006952	defense response	22	75	0.293333	0.623804	0.398179	1	1	TIAR_HUMAN	COL12_HUMAN	MALT1_HUMAN	I17RB_HUMAN	CRIS3_HUMAN	CAMLG_HUMAN	CSF3R_HUMAN	NOD2_HUMAN	NOD1_HUMAN	MX2_HUMAN	STAT4_HUMAN	STA5B_HUMAN	SRCRL_HUMAN	STA5A_HUMAN	STAT2_HUMAN	X3CL1_HUMAN	LIRB3_HUMAN	TAP1_HUMAN	HLAB_HUMAN	DUOX2_HUMAN	CLC1A_HUMAN	CY24B_HUMAN
biological_process	GO:0043484	regulation of RNA splicing	22	94	0.234043	0.947879	0.0721744	1	1	FUS_HUMAN	AFF2_HUMAN	CELF1_HUMAN	BRDT_HUMAN	SON_HUMAN	SRRM4_HUMAN	CDK12_HUMAN	AHNK2_HUMAN	A0A6Q8PGE0_HUMAN	A0A6Q8PHA3_HUMAN	J3QQZ2_HUMAN	J3KNW3_HUMAN	A0A3B3ITL7_HUMAN	A0A087X2B1_HUMAN	A0A6Q8PFM4_HUMAN	J3QRF4_HUMAN	B0QYV1_HUMAN	B0QYY4_HUMAN	A0A6Q8PH77_HUMAN	A0A0G2JRA5_HUMAN	B7Z1U7_HUMAN	F8VZG9_HUMAN
biological_process	GO:0034976	response to endoplasmic reticulum stress	22	79	0.278481	0.918121	0.105321	1	1	PLPL9_HUMAN	TT23L_HUMAN	ELAV4_HUMAN	ENPL_HUMAN	ERN2_HUMAN	P85B_HUMAN	CRERF_HUMAN	P85A_HUMAN	PR15A_HUMAN	PR15B_HUMAN	RGRF2_HUMAN	NIBA1_HUMAN	PDIA4_HUMAN	UBQL1_HUMAN	SC16A_HUMAN	UBP19_HUMAN	TR10B_HUMAN	XBP1_HUMAN	RGRF1_HUMAN	UFL1_HUMAN	ABL1_HUMAN	DDRGK_HUMAN
biological_process	GO:0009791	post-embryonic development	21	66	0.318182	0.995757	0.00847465	1	1	STK36_HUMAN	SSDH_HUMAN	PKHA1_HUMAN	ITPR1_HUMAN	MPRI_HUMAN	KDM5B_HUMAN	HEG1_HUMAN	CELA1_HUMAN	BCL2_HUMAN	APOB_HUMAN	GGYF2_HUMAN	PRDM1_HUMAN	SGPL1_HUMAN	SHIP2_HUMAN	PARPT_HUMAN	SZT2_HUMAN	MORC3_HUMAN	RC3H2_HUMAN	CHSTB_HUMAN	ATM_HUMAN	ABL1_HUMAN
biological_process	GO:0034446	substrate adhesion-dependent cell spreading	20	61	0.327869	0.98113	0.0315931	1	1	PEAK1_HUMAN	URP2_HUMAN	SRGP2_HUMAN	LAMB4_HUMAN	KIF14_HUMAN	LAMC3_HUMAN	LAMB1_HUMAN	FINC_HUMAN	ITB3_HUMAN	LAMA5_HUMAN	LAMB3_HUMAN	P85A_HUMAN	SRCN1_HUMAN	USH2A_HUMAN	UFO_HUMAN	MILK2_HUMAN	ABL1_HUMAN	A0A590UJ70_HUMAN	A0A087X165_HUMAN	A0A087WVV7_HUMAN
biological_process	GO:0032869	cellular response to insulin stimulus	20	106	0.188679	0.913639	0.116454	1	1	PDE3B_HUMAN	SRBS1_HUMAN	HDAC9_HUMAN	INSR_HUMAN	ENPP1_HUMAN	P85B_HUMAN	KAT2B_HUMAN	P85A_HUMAN	SP1_HUMAN	PRKDC_HUMAN	PLPL3_HUMAN	USF1_HUMAN	TBCD4_HUMAN	PHLD_HUMAN	XBP1_HUMAN	CEAM1_HUMAN	DEN4C_HUMAN	MYO5A_HUMAN	LPIN2_HUMAN	LPIN3_HUMAN
biological_process	GO:0001501	skeletal system development	20	128	0.15625	0.897288	0.123299	1	1	PGCA_HUMAN	CSPG2_HUMAN	CHD7_HUMAN	DSPP_HUMAN	EXT1_HUMAN	TCOF_HUMAN	DLX5_HUMAN	TGFB2_HUMAN	TR11B_HUMAN	NCAN_HUMAN	P63_HUMAN	TLE5_HUMAN	TRPS1_HUMAN	RAI1_HUMAN	CO1A2_HUMAN	CO5A2_HUMAN	GLI2_HUMAN	DLX6_HUMAN	EVC_HUMAN	ETS2_HUMAN
biological_process	GO:0032088	negative regulation of NF-kappaB transcription factor activity	20	92	0.217391	0.833507	0.236784	1	1	RO52_HUMAN	TRAIP_HUMAN	LRC14_HUMAN	ERBIN_HUMAN	IRAK3_HUMAN	CATIN_HUMAN	NOD2_HUMAN	PKHD1_HUMAN	OTUL_HUMAN	NLRC5_HUMAN	NLRC3_HUMAN	TNAP3_HUMAN	TLR9_HUMAN	ZC12A_HUMAN	UFL1_HUMAN	TAXB1_HUMAN	ITCH_HUMAN	IRAK1_HUMAN	DNJA3_HUMAN	B4DIP2_HUMAN
biological_process	GO:0009952	anterior/posterior pattern specification	20	100	0.2	0.989923	0.0152115	1	1	PBX1_HUMAN	LRP5_HUMAN	HIPK1_HUMAN	HHEX_HUMAN	BPTF_HUMAN	COT2_HUMAN	EMX2_HUMAN	HXB2_HUMAN	HXC4_HUMAN	HXD10_HUMAN	HXA2_HUMAN	HNF1B_HUMAN	HIPK2_HUMAN	CER1_HUMAN	BHE41_HUMAN	GLI3_HUMAN	A0A2R8YGX0_HUMAN	A0A7I2PJA1_HUMAN	A0A6I8PRU0_HUMAN	A0A7I2V4X9_HUMAN
biological_process	GO:0014068	positive regulation of phosphatidylinositol 3-kinase signaling	20	79	0.253165	0.954514	0.0774674	1	1	PLXB1_HUMAN	HGF_HUMAN	MAZ_HUMAN	HCLS1_HUMAN	ANGP1_HUMAN	INSR_HUMAN	NCF1_HUMAN	FINC_HUMAN	HAX1_HUMAN	EGF_HUMAN	SPA12_HUMAN	SEM4D_HUMAN	NEDD4_HUMAN	TGFB2_HUMAN	RELN_HUMAN	NTRK3_HUMAN	NTRK2_HUMAN	UNC5B_HUMAN	MYOC_HUMAN	CSF3_HUMAN
biological_process	GO:0045665	negative regulation of neuron differentiation	20	65	0.307692	0.996137	0.00815921	1	1	PBX1_HUMAN	JIP4_HUMAN	DDX6_HUMAN	CK5P2_HUMAN	DIXC1_HUMAN	MED1_HUMAN	PAX6_HUMAN	NEPRO_HUMAN	SOX2_HUMAN	ZHX2_HUMAN	ZN536_HUMAN	ASPM_HUMAN	FOXO3_HUMAN	HXA2_HUMAN	MIB1_HUMAN	E2AK4_HUMAN	A4_HUMAN	GLI3_HUMAN	DTX1_HUMAN	A0A075B6G3_HUMAN
biological_process	GO:0060070	canonical Wnt signaling pathway	19	86	0.22093	0.913147	0.108834	1	1	LRP5_HUMAN	LRP6_HUMAN	BCL9L_HUMAN	DIXC1_HUMAN	CTNB1_HUMAN	EXT1_HUMAN	FZD3_HUMAN	PYGO1_HUMAN	SDC1_HUMAN	RYK_HUMAN	TF7L1_HUMAN	TF7L2_HUMAN	WNT2_HUMAN	MED12_HUMAN	GLI1_HUMAN	BCL9_HUMAN	A0A087WZX0_HUMAN	F5H7J9_HUMAN	A0A087X0R0_HUMAN
biological_process	GO:0016042	lipid catabolic process	19	154	0.123377	0.000199622	0.999881	0.233	1	LICH_HUMAN	PLCH2_HUMAN	PLCX2_HUMAN	LIPR3_HUMAN	DGLB_HUMAN	PLCB4_HUMAN	PLCB3_HUMAN	LIPS_HUMAN	LIPE_HUMAN	LIPC_HUMAN	APOA4_HUMAN	A0A0C4DG24_HUMAN	A0A2R8Y3M9_HUMAN	A0A7P0MRI8_HUMAN	A0A1B0GW56_HUMAN	I6L893_HUMAN	B4DTR8_HUMAN	M0R1F7_HUMAN	B9DI82_HUMAN
biological_process	GO:0031398	positive regulation of protein ubiquitination	19	78	0.24359	0.987636	0.0209123	1	1	RASF5_HUMAN	SENP2_HUMAN	RIPK2_HUMAN	RN111_HUMAN	CRY1_HUMAN	MALT1_HUMAN	FANCI_HUMAN	ANGP1_HUMAN	BRCA1_HUMAN	PRIC1_HUMAN	PAXI1_HUMAN	RN180_HUMAN	UBQL1_HUMAN	SPRTN_HUMAN	TSYL5_HUMAN	HUWE1_HUMAN	NSE3_HUMAN	AMER1_HUMAN	DNJA3_HUMAN
biological_process	GO:0006869	lipid transport	19	166	0.114458	0.00997803	0.992666	1	1	MIC26_HUMAN	MRP7_HUMAN	ABCA5_HUMAN	ABCA4_HUMAN	ABCA6_HUMAN	ABCAC_HUMAN	ABCAD_HUMAN	ABCA2_HUMAN	APOA4_HUMAN	H7BYQ5_HUMAN	A0A5F9ZH75_HUMAN	H0Y8C9_HUMAN	A0A087WXK5_HUMAN	J3QSS3_HUMAN	V9GYS1_HUMAN	H0Y8D6_HUMAN	F8VQX7_HUMAN	H7C487_HUMAN	V9GYM3_HUMAN
biological_process	GO:0007204	positive regulation of cytosolic calcium ion concentration	19	148	0.128378	0.0288092	0.980025	1	1	PE2R2_HUMAN	PE2R4_HUMAN	PI2R_HUMAN	PLPL9_HUMAN	LRP6_HUMAN	ITPR3_HUMAN	KNG1_HUMAN	CAC1C_HUMAN	CCR2_HUMAN	CCR9_HUMAN	JAK3_HUMAN	PKD1_HUMAN	CAC1A_HUMAN	PK3CG_HUMAN	LPAR3_HUMAN	DLG4_HUMAN	A4_HUMAN	ABL1_HUMAN	ADCY5_HUMAN
biological_process	GO:0030308	negative regulation of cell growth	19	125	0.152	0.402636	0.66892	1	1	SRTD2_HUMAN	ACVL1_HUMAN	CDN1B_HUMAN	BCL2_HUMAN	CAPR2_HUMAN	ENPP1_HUMAN	GREM1_HUMAN	CARF_HUMAN	ESR2_HUMAN	MNAR1_HUMAN	PML_HUMAN	BTG1_HUMAN	P53_HUMAN	SMCA2_HUMAN	DAB2_HUMAN	WT1_HUMAN	TGFB2_HUMAN	PSRC1_HUMAN	DCBD2_HUMAN
biological_process	GO:0071805	potassium ion transmembrane transport	19	102	0.186275	0.703386	0.360043	1	1	PK2L1_HUMAN	KCNV1_HUMAN	KCNH6_HUMAN	HCN1_HUMAN	KCNN3_HUMAN	KCNQ1_HUMAN	KCNQ2_HUMAN	KCNH3_HUMAN	KCNH2_HUMAN	KCNKH_HUMAN	NALCN_HUMAN	MITOS_HUMAN	NCKX1_HUMAN	SL9C1_HUMAN	PKD2_HUMAN	KCNQ5_HUMAN	KCNH8_HUMAN	KCNH7_HUMAN	ABCC8_HUMAN
biological_process	GO:0006816	calcium ion transport	19	110	0.172727	0.21069	0.82276	1	1	ITPR1_HUMAN	4F2_HUMAN	CAC1C_HUMAN	CAC1F_HUMAN	CAC1E_HUMAN	CTSR1_HUMAN	NMD3A_HUMAN	PKD1_HUMAN	CAC1A_HUMAN	RYR3_HUMAN	NCKX1_HUMAN	PKD2_HUMAN	TRPM2_HUMAN	AT2B2_HUMAN	AT2C1_HUMAN	CAC1B_HUMAN	CLCA1_HUMAN	CA2D1_HUMAN	E7EUE0_HUMAN
biological_process	GO:0007596	blood coagulation	19	108	0.175926	0.797734	0.246425	1	1	LMAN1_HUMAN	JHD2C_HUMAN	MMRN1_HUMAN	KNG1_HUMAN	FA5_HUMAN	B3AT_HUMAN	FA9_HUMAN	ENPP4_HUMAN	FA11_HUMAN	FA8_HUMAN	ITA2_HUMAN	ITB3_HUMAN	ZPI_HUMAN	VWF_HUMAN	IC1_HUMAN	HPS5_HUMAN	A0A0A0MRJ7_HUMAN	E7EPG1_HUMAN	G3V2W1_HUMAN
biological_process	GO:0030433	ubiquitin-dependent ERAD pathway	19	103	0.184466	0.580792	0.515282	1	1	TRI25_HUMAN	MKS3_HUMAN	ENPL_HUMAN	ANKZ1_HUMAN	MA1B1_HUMAN	NPL4_HUMAN	UBXN8_HUMAN	UBXN4_HUMAN	UBQL1_HUMAN	SGTB_HUMAN	UB2J1_HUMAN	UBP19_HUMAN	UBQL2_HUMAN	UBE4B_HUMAN	RHBD2_HUMAN	AMFR_HUMAN	DJC18_HUMAN	A0A087WV67_HUMAN	A0A087WUA4_HUMAN
biological_process	GO:0030216	keratinocyte differentiation	19	56	0.339286	0.725722	0.340249	1	1	K1C16_HUMAN	CDSN_HUMAN	NOTC1_HUMAN	LORI_HUMAN	FILA_HUMAN	EVPL_HUMAN	MED1_HUMAN	PAX6_HUMAN	INTU_HUMAN	K1C10_HUMAN	BCR_HUMAN	ST14_HUMAN	STK4_HUMAN	TXNIP_HUMAN	SUH_HUMAN	YAP1_HUMAN	P63_HUMAN	DESP_HUMAN	A0A1B0GW56_HUMAN
biological_process	GO:0032091	negative regulation of protein binding	18	75	0.24	0.807463	0.27024	1	1	AURKA_HUMAN	DACT1_HUMAN	E41L5_HUMAN	PEX14_HUMAN	NEST_HUMAN	TFP11_HUMAN	DAB2_HUMAN	ROCK1_HUMAN	PIN1_HUMAN	TEX14_HUMAN	UBP33_HUMAN	TLE5_HUMAN	TMC8_HUMAN	XIRP1_HUMAN	ACE_HUMAN	DDX11_HUMAN	GOGA2_HUMAN	ADNP_HUMAN
biological_process	GO:0120162	positive regulation of cold-induced thermogenesis	18	102	0.176471	0.486097	0.6153	1	1	PER2_HUMAN	KDM6B_HUMAN	APC_HUMAN	FUMH_HUMAN	GRB10_HUMAN	CCR2_HUMAN	EPAS1_HUMAN	PRGC2_HUMAN	PRD16_HUMAN	SIR6_HUMAN	PRLR_HUMAN	PRGC1_HUMAN	ZN516_HUMAN	TRPM8_HUMAN	DP13B_HUMAN	COE2_HUMAN	ALMS1_HUMAN	DYHC1_HUMAN
biological_process	GO:0008203	cholesterol metabolic process	18	114	0.157895	0.0208905	0.987668	1	1	LRP5_HUMAN	APOB_HUMAN	APOA1_HUMAN	APOA2_HUMAN	ANGL3_HUMAN	LDLR_HUMAN	SRBP1_HUMAN	SCAP_HUMAN	SRBP2_HUMAN	NF2L1_HUMAN	ABCA5_HUMAN	LIPS_HUMAN	LIPC_HUMAN	A4_HUMAN	APOA4_HUMAN	J9JIE5_HUMAN	A0A0A0MT64_HUMAN	A0A0A0MQU7_HUMAN
biological_process	GO:1990830	cellular response to leukemia inhibitory factor	18	92	0.195652	0.674678	0.425411	1	1	PFKAP_HUMAN	TRI25_HUMAN	JARD2_HUMAN	KDM5B_HUMAN	HELLS_HUMAN	KLF5_HUMAN	BCLF1_HUMAN	EPS8_HUMAN	PAX6_HUMAN	PML_HUMAN	CREB1_HUMAN	NRP2_HUMAN	RIF1_HUMAN	SNG1_HUMAN	SPY2_HUMAN	TEX14_HUMAN	ICAM1_HUMAN	AINX_HUMAN
biological_process	GO:0030512	negative regulation of transforming growth factor beta receptor signaling pathway	18	86	0.209302	0.859267	0.206749	1	1	BCL9L_HUMAN	EGLN_HUMAN	ATL2_HUMAN	PBLD_HUMAN	P53_HUMAN	PRD16_HUMAN	SNX6_HUMAN	SMUF1_HUMAN	SMUF2_HUMAN	SKIL_HUMAN	SPY1_HUMAN	SPY2_HUMAN	TGFI1_HUMAN	PIN1_HUMAN	TGBR3_HUMAN	XBP1_HUMAN	ONEC2_HUMAN	CHSTB_HUMAN
biological_process	GO:0071260	cellular response to mechanical stimulus	18	73	0.246575	0.933685	0.110603	1	1	PE2R4_HUMAN	PDE2A_HUMAN	TNR8_HUMAN	M3K14_HUMAN	M3K1_HUMAN	C8AP2_HUMAN	CHK1_HUMAN	EGLN_HUMAN	HABP4_HUMAN	GTR1_HUMAN	BNIP3_HUMAN	ITA2_HUMAN	TR10B_HUMAN	PIEZ2_HUMAN	TLR3_HUMAN	PIEZ1_HUMAN	BAG3_HUMAN	CNN2_HUMAN
biological_process	GO:0032259	methylation	18	147	0.122449	0.982982	0.0220598	1	1	NNMT_HUMAN	PRDM1_HUMAN	COQ5_HUMAN	PRD10_HUMAN	PRD15_HUMAN	METH_HUMAN	Q4W8S1_HUMAN	A0A7P0TAJ0_HUMAN	B1ANE3_HUMAN	A0A3B3IU23_HUMAN	A0A7P0T9G7_HUMAN	A0A6Q8PGK3_HUMAN	A0A0U1RR76_HUMAN	E9PLV1_HUMAN	E7EUU8_HUMAN	E7ER26_HUMAN	A0A494C1I5_HUMAN	A0A7P0TAV2_HUMAN
biological_process	GO:0007626	locomotory behavior	18	86	0.209302	0.990509	0.0146755	1	1	GABT_HUMAN	DDHD2_HUMAN	ELAV4_HUMAN	FIG4_HUMAN	APBA1_HUMAN	CNTN1_HUMAN	NRG1_HUMAN	RELN_HUMAN	VP13A_HUMAN	NAV2_HUMAN	MYO15_HUMAN	BSH_HUMAN	A4_HUMAN	ALS2_HUMAN	ABCA2_HUMAN	DSCAM_HUMAN	ADCY5_HUMAN	A0A6I8PRU0_HUMAN
biological_process	GO:0006298	mismatch repair	18	92	0.195652	0.623885	0.476179	1	1	EXO1_HUMAN	PMS1_HUMAN	PMS2_HUMAN	SETD2_HUMAN	MLH3_HUMAN	TREX1_HUMAN	RFA2_HUMAN	DPOD3_HUMAN	ABL1_HUMAN	Q5XG96_HUMAN	A0A2R8YG02_HUMAN	Q3BDU3_HUMAN	C9J167_HUMAN	Q5FBZ9_HUMAN	B7ZAA0_HUMAN	G3V419_HUMAN	A0A2R8Y6S3_HUMAN	E9PC65_HUMAN
biological_process	GO:0008584	male gonad development	18	100	0.18	0.705135	0.372124	1	1	RBY1B_HUMAN	LRP2_HUMAN	BCL2_HUMAN	INSR_HUMAN	SIX4_HUMAN	WT1_HUMAN	TGFB2_HUMAN	ZFP42_HUMAN	TLR3_HUMAN	RENI_HUMAN	ACE_HUMAN	ADA21_HUMAN	AP2C_HUMAN	ASPM_HUMAN	ADA29_HUMAN	B2CL1_HUMAN	AMHR2_HUMAN	CTNA1_HUMAN
biological_process	GO:0016032	viral process	18	54	0.333333	0.989681	0.0140653	1	1	POK9_HUMAN	GAK6_HUMAN	GAK24_HUMAN	GAK5_HUMAN	GAK7_HUMAN	GAK10_HUMAN	GAK9_HUMAN	GAK8_HUMAN	GAK21_HUMAN	GA113_HUMAN	P53_HUMAN	GAK19_HUMAN	HCFC2_HUMAN	BICD1_HUMAN	I3L4A1_HUMAN	I3L3E4_HUMAN	A0A087WW88_HUMAN	I3L4G8_HUMAN
biological_process	GO:0010508	positive regulation of autophagy	18	83	0.216867	0.994639	0.00908214	1	1	RO52_HUMAN	TRI65_HUMAN	BNIP3_HUMAN	P3C2A_HUMAN	RN152_HUMAN	ROCK1_HUMAN	TRIM8_HUMAN	XBP1_HUMAN	TRI14_HUMAN	ZC12A_HUMAN	UFL1_HUMAN	LYRIC_HUMAN	RBCC1_HUMAN	FOXO3_HUMAN	IFNG_HUMAN	AMRA1_HUMAN	ATF6A_HUMAN	K7EMG3_HUMAN
biological_process	GO:0009615	response to virus	18	120	0.15	0.929439	0.0873532	1	1	DSRAD_HUMAN	DDX60_HUMAN	IRAK3_HUMAN	APOB_HUMAN	DDX58_HUMAN	OAS3_HUMAN	MX2_HUMAN	TBX21_HUMAN	ZCCHV_HUMAN	DHX58_HUMAN	IKKB_HUMAN	HNRL1_HUMAN	LIRB1_HUMAN	IFNG_HUMAN	ISG15_HUMAN	DUOX2_HUMAN	A0A0A0MRA5_HUMAN	B7Z4B8_HUMAN
biological_process	GO:0007338	single fertilization	18	73	0.246575	0.358573	0.708547	1	1	UROL1_HUMAN	SPAC7_HUMAN	KDM5B_HUMAN	DAZ2_HUMAN	CECR2_HUMAN	CC136_HUMAN	LCN6_HUMAN	O10J1_HUMAN	UBXN8_HUMAN	RNS10_HUMAN	ZP1_HUMAN	ADA21_HUMAN	AKAP4_HUMAN	FETUB_HUMAN	HXD10_HUMAN	ADCY3_HUMAN	F5GXT1_HUMAN	A0A0R4J2E1_HUMAN
biological_process	GO:0002244	hematopoietic progenitor cell differentiation	18	76	0.236842	0.851916	0.195988	1	1	DHTK1_HUMAN	DSRAD_HUMAN	DNAI4_HUMAN	P53_HUMAN	PRC2C_HUMAN	PYGO1_HUMAN	SIN3A_HUMAN	PTPRZ_HUMAN	ZBT24_HUMAN	PTPRC_HUMAN	ZFAT_HUMAN	ARMC6_HUMAN	ATF2_HUMAN	HEAT9_HUMAN	ANLN_HUMAN	CIAO3_HUMAN	A0A096LNH6_HUMAN	A0A2R8YET2_HUMAN
biological_process	GO:0006661	phosphatidylinositol biosynthetic process	18	49	0.367347	0.00256109	0.998487	0.964	1	MTMR7_HUMAN	SYNJ1_HUMAN	FIG4_HUMAN	FYV1_HUMAN	PI51C_HUMAN	P3C2A_HUMAN	PITM3_HUMAN	P4K2A_HUMAN	P4K2B_HUMAN	PITM2_HUMAN	PITM1_HUMAN	PI4KA_HUMAN	SAC2_HUMAN	SHIP1_HUMAN	SHIP2_HUMAN	MTMRE_HUMAN	OCRL_HUMAN	MTMR3_HUMAN
biological_process	GO:0032868	response to insulin	18	65	0.276923	0.982646	0.0248735	1	1	SRSF4_HUMAN	CRY1_HUMAN	KBTB2_HUMAN	KHK_HUMAN	GRB10_HUMAN	KCNQ1_HUMAN	EGR1_HUMAN	GTR1_HUMAN	KLF15_HUMAN	EGR2_HUMAN	SHIP2_HUMAN	SCAP_HUMAN	STXB3_HUMAN	SESN3_HUMAN	VP13C_HUMAN	TSC1_HUMAN	ECHA_HUMAN	ABCC8_HUMAN
biological_process	GO:0006289	nucleotide-excision repair	18	73	0.246575	0.975782	0.0411684	1	1	SLX4_HUMAN	MMS19_HUMAN	FANCC_HUMAN	ERCC5_HUMAN	BRCA2_HUMAN	P53_HUMAN	ZNT9_HUMAN	TF2H4_HUMAN	TF2H1_HUMAN	RFA2_HUMAN	DPOLL_HUMAN	ERCC3_HUMAN	E9PM51_HUMAN	A0A1W2PS85_HUMAN	F2Z2T2_HUMAN	A0A2R8Y6W8_HUMAN	A0A090HNM7_HUMAN	R4GMW8_HUMAN
biological_process	GO:0051865	protein autoubiquitination	18	72	0.25	0.938131	0.102725	1	1	RO52_HUMAN	LRSM1_HUMAN	MARH7_HUMAN	BRCA1_HUMAN	RNF11_HUMAN	RN213_HUMAN	RN157_HUMAN	SH3R1_HUMAN	RNF8_HUMAN	MDM2_HUMAN	RN115_HUMAN	UBE3D_HUMAN	WWP2_HUMAN	AMFR_HUMAN	ITCH_HUMAN	DTX3L_HUMAN	CNOT4_HUMAN	Q5YLB2_HUMAN
biological_process	GO:0050853	B cell receptor signaling pathway	17	138	0.123188	0.0659127	0.957894	1	1	TRBC1_HUMAN	TRBC2_HUMAN	PKHA1_HUMAN	IGLL1_HUMAN	BCL2_HUMAN	IGHA1_HUMAN	BCAR1_HUMAN	CD19_HUMAN	MEF2C_HUMAN	IGHA2_HUMAN	MNDA_HUMAN	PTPRC_HUMAN	NFAC2_HUMAN	IGHD_HUMAN	IGHE_HUMAN	BTK_HUMAN	ABL1_HUMAN
biological_process	GO:0045444	fat cell differentiation	17	72	0.236111	0.884503	0.149894	1	1	SENP2_HUMAN	BBS4_HUMAN	ERAP1_HUMAN	MED1_HUMAN	EP300_HUMAN	EGR2_HUMAN	NIPBL_HUMAN	OSBL8_HUMAN	MKKS_HUMAN	SRBP1_HUMAN	TTC8_HUMAN	TF7L2_HUMAN	OSB11_HUMAN	PTHB1_HUMAN	AP2B_HUMAN	AGRF5_HUMAN	B3KW44_HUMAN
biological_process	GO:0051260	protein homooligomerization	17	176	0.0965909	0.0334215	0.97768	1	1	NLRP1_HUMAN	TP53B_HUMAN	KCNV1_HUMAN	ATLA3_HUMAN	FUS_HUMAN	CAR11_HUMAN	ATLA2_HUMAN	GSDMD_HUMAN	PERF_HUMAN	RN135_HUMAN	PNPT1_HUMAN	VSTM5_HUMAN	XLRS1_HUMAN	ATLA1_HUMAN	DPOLQ_HUMAN	A4_HUMAN	ALS2_HUMAN
biological_process	GO:0000381	regulation of alternative mRNA splicing, via spliceosome	17	83	0.204819	0.744009	0.351872	1	1	RBM5_HUMAN	TIA1_HUMAN	TR150_HUMAN	DDX17_HUMAN	CELF1_HUMAN	FL2D_HUMAN	SRS12_HUMAN	RFOX1_HUMAN	RFOX2_HUMAN	SRRM4_HUMAN	RFOX3_HUMAN	RAVR2_HUMAN	RBM10_HUMAN	RBM15_HUMAN	CELF3_HUMAN	DDX5_HUMAN	CELF2_HUMAN
biological_process	GO:0007623	circadian rhythm	17	63	0.269841	0.985132	0.0220907	1	1	PER1_HUMAN	PER2_HUMAN	TR150_HUMAN	CRY1_HUMAN	CLOCK_HUMAN	KLF10_HUMAN	CREB1_HUMAN	EP300_HUMAN	NOS2_HUMAN	NRIP1_HUMAN	SETX_HUMAN	SRBP1_HUMAN	NTRK2_HUMAN	TIM_HUMAN	HOME1_HUMAN	KCNH7_HUMAN	BMAL2_HUMAN
biological_process	GO:0071456	cellular response to hypoxia	17	110	0.154545	0.401342	0.672254	1	1	TPOR_HUMAN	HIF1A_HUMAN	LMNA_HUMAN	ANGP4_HUMAN	BCL2_HUMAN	FMN2_HUMAN	EPAS1_HUMAN	E2F1_HUMAN	BNIP3_HUMAN	P53_HUMAN	SIR2_HUMAN	UBQL1_HUMAN	MDM2_HUMAN	FOXO3_HUMAN	HIPK2_HUMAN	IRAK1_HUMAN	CLCA1_HUMAN
biological_process	GO:0031532	actin cytoskeleton reorganization	17	71	0.239437	0.896386	0.147905	1	1	SI1L1_HUMAN	MKLN1_HUMAN	TNIK_HUMAN	INSRR_HUMAN	EPS8_HUMAN	MRCKB_HUMAN	MRCKG_HUMAN	SRC8_HUMAN	MRCKA_HUMAN	THS7B_HUMAN	MYH9_HUMAN	THS7A_HUMAN	NRK_HUMAN	AT2C1_HUMAN	AUTS2_HUMAN	MILK2_HUMAN	ASB2_HUMAN
biological_process	GO:0008286	insulin receptor signaling pathway	17	58	0.293103	0.98113	0.0315931	1	1	SOGA1_HUMAN	SRBS1_HUMAN	GRB14_HUMAN	APC_HUMAN	INSR_HUMAN	GRB10_HUMAN	BCAR1_HUMAN	P85B_HUMAN	P3C2A_HUMAN	FOXO4_HUMAN	DNAI1_HUMAN	P85A_HUMAN	SRBP1_HUMAN	P55G_HUMAN	PHLD_HUMAN	ZN106_HUMAN	BAIP2_HUMAN
biological_process	GO:0035725	sodium ion transmembrane transport	17	70	0.242857	0.876884	0.167376	1	1	PK2L1_HUMAN	S6A15_HUMAN	S12A1_HUMAN	S6A14_HUMAN	HCN1_HUMAN	NALCN_HUMAN	NCKX1_HUMAN	S12A2_HUMAN	SCN5A_HUMAN	SCN7A_HUMAN	SCNBA_HUMAN	S6A12_HUMAN	SC6A1_HUMAN	PKD2_HUMAN	ASIC1_HUMAN	ASIC3_HUMAN	ASIC5_HUMAN
biological_process	GO:0071466	cellular response to xenobiotic stimulus	17	63	0.269841	0.0832808	0.943832	1	1	PDE2A_HUMAN	PDE4B_HUMAN	NF2L2_HUMAN	KCNQ1_HUMAN	E2F1_HUMAN	CRHBP_HUMAN	MEF2C_HUMAN	KCNH2_HUMAN	P53_HUMAN	CHK2_HUMAN	NOS2_HUMAN	RECQ5_HUMAN	PHLD_HUMAN	TLR3_HUMAN	RENI_HUMAN	MYPT1_HUMAN	EHMT2_HUMAN
biological_process	GO:0043406	positive regulation of MAP kinase activity	17	77	0.220779	0.767292	0.309321	1	1	PI3R5_HUMAN	TAB1_HUMAN	MAGD1_HUMAN	INSR_HUMAN	MEF2C_HUMAN	GRP1_HUMAN	EGF_HUMAN	NOD2_HUMAN	PK3CG_HUMAN	ROBO1_HUMAN	PTPRC_HUMAN	TEN1_HUMAN	NTRK3_HUMAN	NEK10_HUMAN	IRAK1_HUMAN	A4_HUMAN	AKP13_HUMAN
biological_process	GO:0032007	negative regulation of TOR signaling	17	51	0.333333	0.997864	0.00486211	1	1	HIF1A_HUMAN	MAPK5_HUMAN	DDIT4_HUMAN	MNAR1_HUMAN	DEPD5_HUMAN	TSC1_HUMAN	TSC2_HUMAN	A0A2R8YGD6_HUMAN	A0A2R8Y7C8_HUMAN	A0A2R8Y5F1_HUMAN	A0A2R8Y6C9_HUMAN	H3BMQ0_HUMAN	X5D2U8_HUMAN	A0A2R8YDZ2_HUMAN	A0A2R8Y7X5_HUMAN	A0A2R8YGU4_HUMAN	A0A2R8YDR3_HUMAN
biological_process	GO:0048839	inner ear development	17	66	0.257576	0.989923	0.0152115	1	1	MAPK2_HUMAN	CDN1B_HUMAN	KCNQ1_HUMAN	FREM2_HUMAN	STOX1_HUMAN	PCD15_HUMAN	SOX2_HUMAN	PLPR4_HUMAN	TGFB2_HUMAN	AGRV1_HUMAN	EYA4_HUMAN	E7EM53_HUMAN	A2A3D8_HUMAN	A2A3E8_HUMAN	A2A3E7_HUMAN	A2A3E6_HUMAN	X6RAN8_HUMAN
biological_process	GO:0021766	hippocampus development	17	64	0.265625	0.894572	0.162941	1	1	PLXA3_HUMAN	ALK_HUMAN	KIRR3_HUMAN	KIF14_HUMAN	BBS4_HUMAN	EZH1_HUMAN	DLX1_HUMAN	DLX2_HUMAN	MKKS_HUMAN	SRF_HUMAN	PHLP2_HUMAN	XRCC1_HUMAN	RELN_HUMAN	TSC1_HUMAN	GLI3_HUMAN	AT2B4_HUMAN	DAB1_HUMAN
biological_process	GO:0045727	positive regulation of translation	17	73	0.232877	0.961502	0.0583672	1	1	PLXB2_HUMAN	LAR1B_HUMAN	LARP1_HUMAN	LARP6_HUMAN	LAR4B_HUMAN	EIF3D_HUMAN	K1C17_HUMAN	ITA2_HUMAN	NIBA1_HUMAN	PRKDC_HUMAN	SMAG1_HUMAN	UCN1_HUMAN	ZCHC4_HUMAN	YTHD3_HUMAN	IF4G2_HUMAN	BARH2_HUMAN	D3DQV9_HUMAN
biological_process	GO:0046854	phosphatidylinositol phosphate biosynthetic process	17	83	0.204819	0.710601	0.38632	1	1	PK3C3_HUMAN	PK3CA_HUMAN	SMG1_HUMAN	HYCCI_HUMAN	F126B_HUMAN	P85B_HUMAN	P3C2A_HUMAN	P4K2A_HUMAN	P4K2B_HUMAN	P85A_HUMAN	IP3KB_HUMAN	PI4KA_HUMAN	PK3CG_HUMAN	P55G_HUMAN	IP3KC_HUMAN	E9PDN7_HUMAN	A0A0C4DGF9_HUMAN
biological_process	GO:0040008	regulation of growth	17	71	0.239437	0.99191	0.0103966	1	1	LRP12_HUMAN	IGS11_HUMAN	ING3_HUMAN	EPC1_HUMAN	BRD8_HUMAN	ING2_HUMAN	PRAME_HUMAN	TLE5_HUMAN	TSYL5_HUMAN	VPS54_HUMAN	NSE3_HUMAN	IFNG_HUMAN	MO4L2_HUMAN	B2CL1_HUMAN	E7ET07_HUMAN	A0A087X1Q5_HUMAN	A0A0J9YXY1_HUMAN
biological_process	GO:0030968	endoplasmic reticulum unfolded protein response	17	77	0.220779	0.924371	0.115049	1	1	NF2L2_HUMAN	CR3L1_HUMAN	XBP1_HUMAN	RHBD2_HUMAN	AMFR_HUMAN	ATF6A_HUMAN	A0A7P0T992_HUMAN	E7ETG2_HUMAN	A0A7P0Z421_HUMAN	A0A7P0T9V3_HUMAN	H0Y7D7_HUMAN	A0A7P0T8R5_HUMAN	A0A7P0TAH1_HUMAN	A0A7P0T9H5_HUMAN	A0A7P0Z4I7_HUMAN	A0A7P0T8Y1_HUMAN	A0A7P0TAF2_HUMAN
biological_process	GO:0033674	positive regulation of kinase activity	17	71	0.239437	0.979985	0.0266085	1	1	MRE11_HUMAN	LMTK2_HUMAN	ALK_HUMAN	INSRR_HUMAN	INSR_HUMAN	EPHB1_HUMAN	LTK_HUMAN	RYK_HUMAN	ROS1_HUMAN	ZNF16_HUMAN	UFO_HUMAN	NTRK3_HUMAN	NTRK2_HUMAN	RET_HUMAN	RAD50_HUMAN	NBN_HUMAN	GCN1_HUMAN
biological_process	GO:0034220	ion transmembrane transport	17	107	0.158879	0.0186778	0.984531	1	1	S12A1_HUMAN	NALCN_HUMAN	WWP1_HUMAN	TTYH1_HUMAN	AT2B2_HUMAN	AT2C1_HUMAN	AT10A_HUMAN	AT8A1_HUMAN	AT131_HUMAN	AT132_HUMAN	ANO3_HUMAN	CLCA1_HUMAN	CLCA4_HUMAN	ANO5_HUMAN	AT2B4_HUMAN	CLCN6_HUMAN	ANO2_HUMAN
biological_process	GO:0070588	calcium ion transmembrane transport	17	75	0.226667	0.204625	0.835607	1	1	TP4AP_HUMAN	CAC1C_HUMAN	CAC1G_HUMAN	NALCN_HUMAN	PKD1_HUMAN	CAC1A_HUMAN	RYR3_HUMAN	NCKX1_HUMAN	PKD2_HUMAN	TRPM6_HUMAN	TRPM2_HUMAN	TRPM5_HUMAN	TRPM8_HUMAN	AT2C1_HUMAN	ASIC1_HUMAN	CA2D4_HUMAN	AT2B4_HUMAN
biological_process	GO:0036297	interstrand cross-link repair	17	84	0.202381	0.7451	0.347725	1	1	SLX4_HUMAN	FANCC_HUMAN	FANCM_HUMAN	FACD2_HUMAN	DCR1B_HUMAN	ATR_HUMAN	FANCB_HUMAN	ER6L2_HUMAN	RNF8_HUMAN	RFWD3_HUMAN	R51A2_HUMAN	DCR1C_HUMAN	DCR1A_HUMAN	C9J5X9_HUMAN	E7EVV8_HUMAN	A0A087WW44_HUMAN	A0A2R8YDV8_HUMAN
biological_process	GO:0045666	positive regulation of neuron differentiation	16	87	0.183908	0.637678	0.464605	1	1	MAP1B_HUMAN	HTF4_HUMAN	JIP4_HUMAN	MEF2C_HUMAN	SIN3A_HUMAN	TFE2_HUMAN	NCOA1_HUMAN	ZEB1_HUMAN	IF4G1_HUMAN	A4_HUMAN	DAB1_HUMAN	DMD_HUMAN	ARHG2_HUMAN	F6TDF5_HUMAN	A0A075B6G3_HUMAN	A0A7I2PJA1_HUMAN
biological_process	GO:0043433	negative regulation of DNA-binding transcription factor activity	16	78	0.205128	0.936007	0.090126	1	1	PBX1_HUMAN	EOMES_HUMAN	E2F1_HUMAN	PAXI1_HUMAN	PEX14_HUMAN	MED13_HUMAN	MEN1_HUMAN	SP100_HUMAN	TBXT_HUMAN	TF7L2_HUMAN	TNR4_HUMAN	WWP2_HUMAN	TAF1_HUMAN	PTC1_HUMAN	KEAP1_HUMAN	J3KP65_HUMAN
biological_process	GO:0001837	epithelial to mesenchymal transition	16	45	0.355556	0.978379	0.0337622	1	1	ROAA_HUMAN	ROCK2_HUMAN	HIF1A_HUMAN	HGF_HUMAN	NOTC1_HUMAN	EGLN_HUMAN	CTNB1_HUMAN	E41L5_HUMAN	DDX17_HUMAN	FA83D_HUMAN	ROCK1_HUMAN	TGFB2_HUMAN	SUH_HUMAN	TGBR3_HUMAN	DDX5_HUMAN	AKNA_HUMAN
biological_process	GO:0042475	odontogenesis of dentin-containing tooth	16	58	0.275862	0.989111	0.0199791	1	1	RUNX2_HUMAN	AMTN_HUMAN	CTNB1_HUMAN	DLX1_HUMAN	DLX2_HUMAN	LAMA5_HUMAN	SCN5A_HUMAN	NKX23_HUMAN	P63_HUMAN	DLX3_HUMAN	AMBN_HUMAN	GLI2_HUMAN	GLI3_HUMAN	CTNA1_HUMAN	A0A7I2PJA1_HUMAN	A0A087WV21_HUMAN
biological_process	GO:0016575	histone deacetylation	16	46	0.347826	0.995365	0.00894529	1	1	MIER2_HUMAN	HDAC9_HUMAN	MDEAS_HUMAN	HDAC6_HUMAN	CHD4_HUMAN	MIER1_HUMAN	BAZ2A_HUMAN	P66A_HUMAN	SIR2_HUMAN	SIN3A_HUMAN	SIN3B_HUMAN	TBL1Y_HUMAN	TREF1_HUMAN	ZN541_HUMAN	RBM14_HUMAN	MO4L2_HUMAN
biological_process	GO:0042752	regulation of circadian rhythm	16	63	0.253968	0.889176	0.157977	1	1	PER1_HUMAN	PER2_HUMAN	ROCK2_HUMAN	CRY1_HUMAN	MAGD1_HUMAN	MAGL2_HUMAN	CLOCK_HUMAN	KLF10_HUMAN	PML_HUMAN	NR1D2_HUMAN	PRKDC_HUMAN	TADBP_HUMAN	USP9X_HUMAN	PRGC1_HUMAN	TIM_HUMAN	NR1D1_HUMAN
biological_process	GO:0001503	ossification	16	83	0.192771	0.887635	0.13709	1	1	RUNX2_HUMAN	SUCO_HUMAN	SP3_HUMAN	BCL2_HUMAN	IGS10_HUMAN	DSPP_HUMAN	EXT1_HUMAN	DMP1_HUMAN	DHX36_HUMAN	PRGC2_HUMAN	TNR11_HUMAN	TETN_HUMAN	PHLD_HUMAN	TAPT1_HUMAN	ECM1_HUMAN	CO5A2_HUMAN
biological_process	GO:0045669	positive regulation of osteoblast differentiation	16	67	0.238806	0.903746	0.156673	1	1	RUNX2_HUMAN	SUCO_HUMAN	LRP3_HUMAN	LRP5_HUMAN	HGF_HUMAN	CTNB1_HUMAN	FBN2_HUMAN	MEF2C_HUMAN	WWTR1_HUMAN	YAP1_HUMAN	P63_HUMAN	ZHX3_HUMAN	IL6RA_HUMAN	IL6RB_HUMAN	ACVR1_HUMAN	GLI3_HUMAN
biological_process	GO:0050796	regulation of insulin secretion	16	59	0.271186	0.70826	0.361275	1	1	PER2_HUMAN	CLOCK_HUMAN	EIPR1_HUMAN	NOS2_HUMAN	RFX6_HUMAN	RFX3_HUMAN	AP2B_HUMAN	ICA69_HUMAN	IFNG_HUMAN	C9J8Y3_HUMAN	E9PDL4_HUMAN	E7ENI6_HUMAN	C9J3Y4_HUMAN	A0A3B3IST8_HUMAN	Q6LCR0_HUMAN	B9ZVM7_HUMAN
biological_process	GO:0006909	phagocytosis	16	82	0.195122	0.113293	0.911874	1	1	PECA1_HUMAN	PK3CA_HUMAN	RUBIC_HUMAN	LRP1_HUMAN	LYST_HUMAN	IRF8_HUMAN	K1109_HUMAN	ITAL_HUMAN	PI51C_HUMAN	PRTN3_HUMAN	LDLR_HUMAN	NCF2_HUMAN	UFO_HUMAN	UN13D_HUMAN	ICAM5_HUMAN	CA043_HUMAN
biological_process	GO:0051289	protein homotetramerization	16	60	0.266667	0.961015	0.0722671	1	1	PK2L1_HUMAN	CRTC1_HUMAN	HCN1_HUMAN	EVL_HUMAN	CRTC3_HUMAN	RYR3_HUMAN	PKD2_HUMAN	UBP16_HUMAN	TRPM2_HUMAN	DP13B_HUMAN	CRTC2_HUMAN	GOGA2_HUMAN	ACACA_HUMAN	ACACB_HUMAN	Q5T4K5_HUMAN	H0YK33_HUMAN
biological_process	GO:1901796	regulation of signal transduction by p53 class mediator	16	41	0.390244	0.971186	0.0476718	1	1	MAPK5_HUMAN	KAT6A_HUMAN	AURKA_HUMAN	NOP2_HUMAN	BOP1_HUMAN	CHK1_HUMAN	EP300_HUMAN	CHK2_HUMAN	TIF1A_HUMAN	RFFL_HUMAN	URB2_HUMAN	TAF1_HUMAN	UBP2_HUMAN	HIPK2_HUMAN	ATM_HUMAN	ANM5_HUMAN
biological_process	GO:0030073	insulin secretion	16	41	0.390244	0.991622	0.0129409	1	1	PCLO_HUMAN	PTPRN_HUMAN	RIMS2_HUMAN	STXB3_HUMAN	RPGF4_HUMAN	HNF1A_HUMAN	HNF1B_HUMAN	H0YND5_HUMAN	A0A0A0MTK8_HUMAN	F5H0K0_HUMAN	U3KQS6_HUMAN	A0A087WXS2_HUMAN	A0A087WZC2_HUMAN	E0YMJ8_HUMAN	A0A0A0MQU7_HUMAN	A0A0C4DGS8_HUMAN
biological_process	GO:0007162	negative regulation of cell adhesion	16	51	0.313725	0.958414	0.0558639	1	1	PDE3B_HUMAN	PLXA3_HUMAN	PLXA4_HUMAN	PLXB1_HUMAN	PLXB2_HUMAN	PLXB3_HUMAN	PLXD1_HUMAN	ACVL1_HUMAN	KNG1_HUMAN	ANGP1_HUMAN	PODXL_HUMAN	SEM4D_HUMAN	TGO1_HUMAN	ADA22_HUMAN	DAB1_HUMAN	DSCAM_HUMAN
biological_process	GO:0007613	memory	16	85	0.188235	0.905264	0.137436	1	1	PLPL9_HUMAN	CRTC1_HUMAN	ITPR3_HUMAN	HRH1_HUMAN	INSR_HUMAN	NETO1_HUMAN	ITA3_HUMAN	CREB1_HUMAN	SC6A1_HUMAN	ATX1_HUMAN	ATX1L_HUMAN	ASIC1_HUMAN	ABCC8_HUMAN	A4_HUMAN	CIC_HUMAN	AGRF1_HUMAN
biological_process	GO:0000045	autophagosome assembly	16	74	0.216216	0.91973	0.118576	1	1	PK3C3_HUMAN	RUFY4_HUMAN	SYNP2_HUMAN	UBQL1_HUMAN	STING_HUMAN	WIPI4_HUMAN	UBQL2_HUMAN	BAKOR_HUMAN	RBCC1_HUMAN	ATG2A_HUMAN	ATG2B_HUMAN	ATG13_HUMAN	ATG9B_HUMAN	BAG3_HUMAN	AP4M1_HUMAN	AMRA1_HUMAN
biological_process	GO:0042552	myelination	16	56	0.285714	0.992435	0.0123664	1	1	HYCCI_HUMAN	GALC_HUMAN	NFASC_HUMAN	EGR2_HUMAN	ZNF24_HUMAN	TSC1_HUMAN	ACBG1_HUMAN	BCAS1_HUMAN	MTMRD_HUMAN	MBP_HUMAN	KELL_HUMAN	EI2BD_HUMAN	D6RBU5_HUMAN	X6RKN2_HUMAN	H7BY57_HUMAN	A0A7P0Z4R6_HUMAN
biological_process	GO:0150104	transport across blood-brain barrier	16	84	0.190476	0.567911	0.542025	1	1	LRP2_HUMAN	LRP3_HUMAN	LRP1_HUMAN	MDR1_HUMAN	INSR_HUMAN	GTR1_HUMAN	MRP2_HUMAN	GTR3_HUMAN	B3A3_HUMAN	S12A2_HUMAN	SC6A1_HUMAN	S38A5_HUMAN	AT8A1_HUMAN	MRP4_HUMAN	ABCA2_HUMAN	AT2B4_HUMAN
biological_process	GO:0050829	defense response to Gram-negative bacterium	16	91	0.175824	0.373566	0.723053	1	1	MPEG1_HUMAN	CMGA_HUMAN	AGRB1_HUMAN	GSDMD_HUMAN	NOS2_HUMAN	PRB3_HUMAN	SRCRL_HUMAN	TLR9_HUMAN	TSLP_HUMAN	NAL10_HUMAN	IL23A_HUMAN	IL6RA_HUMAN	BY55_HUMAN	A4_HUMAN	BPI_HUMAN	A0A2R8YDF1_HUMAN
biological_process	GO:0030307	positive regulation of cell growth	16	88	0.181818	0.942722	0.0825438	1	1	TAF9B_HUMAN	LGI1_HUMAN	BRAT1_HUMAN	BCL2_HUMAN	K1C17_HUMAN	CARF_HUMAN	INO80_HUMAN	KDM2B_HUMAN	NRG1_HUMAN	SUV3_HUMAN	TGFB2_HUMAN	YAP1_HUMAN	UCN1_HUMAN	AKAP6_HUMAN	IF4G1_HUMAN	IF4G2_HUMAN
biological_process	GO:0071277	cellular response to calcium ion	16	87	0.183908	0.955981	0.0718003	1	1	SYT3_HUMAN	FOSB_HUMAN	CARTF_HUMAN	AL5AP_HUMAN	CRHBP_HUMAN	MEF2C_HUMAN	IP3KB_HUMAN	RYR3_HUMAN	SCN5A_HUMAN	PKD2_HUMAN	PHLD_HUMAN	TRPM2_HUMAN	CPNE5_HUMAN	MEF2A_HUMAN	CHP2_HUMAN	AGRV1_HUMAN
biological_process	GO:0050885	neuromuscular process controlling balance	16	46	0.347826	0.995001	0.0114126	1	1	SHAN1_HUMAN	HERC1_HUMAN	CNTP1_HUMAN	BCR_HUMAN	GGYF2_HUMAN	RFOX1_HUMAN	RFOX2_HUMAN	TENR_HUMAN	DLG4_HUMAN	IGDC3_HUMAN	NBN_HUMAN	HMX3_HUMAN	A4_HUMAN	CMTA1_HUMAN	ABL1_HUMAN	ADCY5_HUMAN
biological_process	GO:0042391	regulation of membrane potential	16	101	0.158416	0.154551	0.874379	1	1	KINH_HUMAN	KCNH6_HUMAN	HCN1_HUMAN	CAC1G_HUMAN	KCNH3_HUMAN	KCNH2_HUMAN	RIMS2_HUMAN	S26A5_HUMAN	NEDD4_HUMAN	RIMS1_HUMAN	WWP2_HUMAN	PIEZ2_HUMAN	PIEZ1_HUMAN	ASIC1_HUMAN	KCNH8_HUMAN	KCNH7_HUMAN
biological_process	GO:0010507	negative regulation of autophagy	16	48	0.333333	0.998297	0.00367676	1	1	TAB2_HUMAN	TAB3_HUMAN	RUBIC_HUMAN	HGF_HUMAN	HERC1_HUMAN	BCL2_HUMAN	FOXK1_HUMAN	MTMR8_HUMAN	SIR2_HUMAN	PTN22_HUMAN	ZKSC3_HUMAN	IF4G1_HUMAN	IF4G2_HUMAN	GOGA2_HUMAN	BMF_HUMAN	B2CL1_HUMAN
biological_process	GO:0030838	positive regulation of actin filament polymerization	16	51	0.313725	0.922564	0.108642	1	1	LMOD2_HUMAN	FMN1_HUMAN	FCSD2_HUMAN	FCSD1_HUMAN	CRACD_HUMAN	CCL21_HUMAN	BIN1_HUMAN	EVL_HUMAN	KIRR1_HUMAN	CARL1_HUMAN	NPHN_HUMAN	SRC8_HUMAN	TEN1_HUMAN	BAIP2_HUMAN	CSF3_HUMAN	BORG2_HUMAN
biological_process	GO:0001947	heart looping	16	63	0.253968	0.932556	0.115719	1	1	HIF1A_HUMAN	C2CD3_HUMAN	NOTC1_HUMAN	BBS4_HUMAN	EGLN_HUMAN	MEF2C_HUMAN	FOXN4_HUMAN	MICA2_HUMAN	MKKS_HUMAN	STIL_HUMAN	PKD2_HUMAN	SRF_HUMAN	MIB1_HUMAN	CCD40_HUMAN	ASB2_HUMAN	AHI1_HUMAN
biological_process	GO:0008344	adult locomotory behavior	16	50	0.32	0.989141	0.0207523	1	1	OTOG_HUMAN	SEZ6_HUMAN	LGI4_HUMAN	CYTB_HUMAN	EPS8_HUMAN	GGYF2_HUMAN	NCHL1_HUMAN	SAC2_HUMAN	PUM1_HUMAN	PBX3_HUMAN	TSC1_HUMAN	HXD10_HUMAN	A4_HUMAN	A0A087WYL5_HUMAN	H7C3I4_HUMAN	H9KVB3_HUMAN
biological_process	GO:0070301	cellular response to hydrogen peroxide	15	60	0.25	0.82312	0.255991	1	1	PAX2_HUMAN	NF2L2_HUMAN	PKHA1_HUMAN	KDM6B_HUMAN	HDAC6_HUMAN	ANKZ1_HUMAN	BNIP3_HUMAN	OSER1_HUMAN	I18BP_HUMAN	RIPK1_HUMAN	SETX_HUMAN	UFO_HUMAN	TNAP3_HUMAN	TRPM2_HUMAN	ABL1_HUMAN
biological_process	GO:1901224	positive regulation of NIK/NF-kappaB signaling	15	67	0.223881	0.843327	0.239304	1	1	NFAT5_HUMAN	GREM1_HUMAN	EP300_HUMAN	NOD2_HUMAN	NOD1_HUMAN	TRIP6_HUMAN	TE2IP_HUMAN	ZN268_HUMAN	TLR9_HUMAN	TLR3_HUMAN	RC3H1_HUMAN	RC3H2_HUMAN	IL23A_HUMAN	IRAK1_HUMAN	A4_HUMAN
biological_process	GO:0007157	heterophilic cell-cell adhesion via plasma membrane cell adhesion molecules	15	49	0.306122	0.988174	0.0263379	1	1	PTPRD_HUMAN	ITAL_HUMAN	GRID2_HUMAN	CD209_HUMAN	NECT1_HUMAN	NECT4_HUMAN	TEN4_HUMAN	PVR_HUMAN	TEN1_HUMAN	TEN2_HUMAN	TEN3_HUMAN	AGRL1_HUMAN	ICAM1_HUMAN	HMCN1_HUMAN	CADH4_HUMAN
biological_process	GO:0006367	transcription initiation from RNA polymerase II promoter	15	80	0.1875	0.93572	0.0958752	1	1	MED17_HUMAN	TAF6_HUMAN	TAF8_HUMAN	MAZ_HUMAN	MED26_HUMAN	TAF2_HUMAN	TAF4_HUMAN	TAF4B_HUMAN	PRGC1_HUMAN	TAF1_HUMAN	TBP_HUMAN	ERCC3_HUMAN	E9PP94_HUMAN	J3KR72_HUMAN	A0A2R8Y6W8_HUMAN
biological_process	GO:0006464	cellular protein modification process	15	107	0.140187	0.967476	0.0355393	1	1	RPN2_HUMAN	PGTA_HUMAN	MSRA_HUMAN	PP4R2_HUMAN	RPN1_HUMAN	PRKDC_HUMAN	TGM5_HUMAN	UEVLD_HUMAN	UBA3_HUMAN	UBP6_HUMAN	WWP2_HUMAN	BAP1_HUMAN	ABL1_HUMAN	A0A0U1RQK4_HUMAN	G3V2J9_HUMAN
biological_process	GO:0070373	negative regulation of ERK1 and ERK2 cascade	15	81	0.185185	0.581729	0.531788	1	1	EIF3A_HUMAN	DUS6_HUMAN	SPY1_HUMAN	SPY2_HUMAN	SPY3_HUMAN	DAB2_HUMAN	WNK2_HUMAN	PIN1_HUMAN	PTPRC_HUMAN	XBP1_HUMAN	RANB9_HUMAN	NDRG2_HUMAN	ABL1_HUMAN	DUS9_HUMAN	A0A075B6G3_HUMAN
biological_process	GO:0071300	cellular response to retinoic acid	15	72	0.208333	0.760615	0.339476	1	1	PAX2_HUMAN	SNW1_HUMAN	HTRA2_HUMAN	CREB1_HUMAN	LTK_HUMAN	MEIOS_HUMAN	SETX_HUMAN	YAP1_HUMAN	WNT2_HUMAN	NTRK3_HUMAN	RET_HUMAN	ZNF35_HUMAN	HXA2_HUMAN	ATM_HUMAN	J3KP65_HUMAN
biological_process	GO:0009566	fertilization	15	51	0.294118	0.791688	0.25782	1	1	RIM3C_HUMAN	KLK14_HUMAN	FND3A_HUMAN	COT2_HUMAN	APOB_HUMAN	SYCP2_HUMAN	SPTN4_HUMAN	RIM3B_HUMAN	RIM3A_HUMAN	SPT46_HUMAN	TSSK4_HUMAN	F170A_HUMAN	B2CL1_HUMAN	EHMT2_HUMAN	X6RAN8_HUMAN
biological_process	GO:0007368	determination of left/right symmetry	15	61	0.245902	0.968053	0.0502223	1	1	AP1B1_HUMAN	NOTC1_HUMAN	FTM_HUMAN	BROMI_HUMAN	DYHC2_HUMAN	DNAI1_HUMAN	MKKS_HUMAN	STIL_HUMAN	PKD2_HUMAN	ODAD3_HUMAN	IFT74_HUMAN	ACVR1_HUMAN	BICC1_HUMAN	DYH5_HUMAN	DYH11_HUMAN
biological_process	GO:0050830	defense response to Gram-positive bacterium	15	107	0.140187	0.138527	0.912173	1	1	RIPK2_HUMAN	I27RA_HUMAN	MPEG1_HUMAN	HLAA_HUMAN	CMGA_HUMAN	LYG1_HUMAN	GSDMD_HUMAN	NOD2_HUMAN	PGRP2_HUMAN	NOD1_HUMAN	SRCRL_HUMAN	PGRP4_HUMAN	TNFB_HUMAN	IL6RA_HUMAN	A4_HUMAN
biological_process	GO:0051965	positive regulation of synapse assembly	15	60	0.25	0.991016	0.0187836	1	1	SLIK4_HUMAN	PTPRD_HUMAN	LRRN1_HUMAN	LRRT2_HUMAN	EPHB1_HUMAN	AGRB1_HUMAN	GRID2_HUMAN	SLIK2_HUMAN	SLIK3_HUMAN	NTRK2_HUMAN	AGRB3_HUMAN	CUX2_HUMAN	ADNP_HUMAN	CSTN1_HUMAN	B3KTY4_HUMAN
biological_process	GO:0007009	plasma membrane organization	15	46	0.326087	0.287666	0.767843	1	1	FR1L6_HUMAN	ANK3_HUMAN	MTSS1_HUMAN	SPTB2_HUMAN	MYOF_HUMAN	DYSF_HUMAN	BAIP2_HUMAN	E7EWW5_HUMAN	I3L2M4_HUMAN	I3L327_HUMAN	I3L526_HUMAN	I3L125_HUMAN	I3L4C2_HUMAN	I3L0M4_HUMAN	I3L1C8_HUMAN
biological_process	GO:0030183	B cell differentiation	15	80	0.1875	0.914257	0.122054	1	1	SP3_HUMAN	HDAC9_HUMAN	HHEX_HUMAN	GON4L_HUMAN	JAK3_HUMAN	CAR11_HUMAN	GPS2_HUMAN	EP300_HUMAN	P85A_HUMAN	TFE2_HUMAN	SUH_HUMAN	PTPRC_HUMAN	DCR1C_HUMAN	A0A087WUE6_HUMAN	A4PB68_HUMAN
biological_process	GO:0001570	vasculogenesis	15	62	0.241935	0.993604	0.012675	1	1	HEG1_HUMAN	EGLN_HUMAN	FOG2_HUMAN	PAXI1_HUMAN	SGPL1_HUMAN	PARPT_HUMAN	WT1_HUMAN	YAP1_HUMAN	ZMIZ1_HUMAN	NTRK2_HUMAN	MYO1E_HUMAN	MY18B_HUMAN	MYCD_HUMAN	AMOT_HUMAN	J3KP65_HUMAN
biological_process	GO:0006406	mRNA export from nucleus	15	99	0.151515	0.580792	0.515282	1	1	SMG1_HUMAN	RENT1_HUMAN	HHEX_HUMAN	NU214_HUMAN	NXF3_HUMAN	GANP_HUMAN	NUP85_HUMAN	NXF2_HUMAN	SMG7_HUMAN	NU107_HUMAN	THOC7_HUMAN	TPR_HUMAN	NU133_HUMAN	NU160_HUMAN	GLE1_HUMAN
biological_process	GO:0045494	photoreceptor cell maintenance	15	45	0.333333	0.995247	0.0119022	1	1	MAK_HUMAN	IQCB1_HUMAN	BBS4_HUMAN	BBS10_HUMAN	ERCC6_HUMAN	GTR1_HUMAN	LCA5_HUMAN	NPHP4_HUMAN	MKKS_HUMAN	RP1_HUMAN	PCD15_HUMAN	RP1L1_HUMAN	USH2A_HUMAN	ABCA4_HUMAN	AGRV1_HUMAN
biological_process	GO:0032720	negative regulation of tumor necrosis factor production	15	62	0.241935	0.907613	0.15372	1	1	I27RA_HUMAN	IRAK3_HUMAN	CATIN_HUMAN	ILRUN_HUMAN	NOD2_HUMAN	PTN22_HUMAN	X3CL1_HUMAN	UFO_HUMAN	NLRC3_HUMAN	TNAP3_HUMAN	ZC12A_HUMAN	LIRB1_HUMAN	BPI_HUMAN	CD34_HUMAN	A0A0B4J1S7_HUMAN
biological_process	GO:0009749	response to glucose	15	66	0.227273	0.95847	0.0600696	1	1	KHK_HUMAN	CDN1B_HUMAN	EGR1_HUMAN	ANGP2_HUMAN	APOA2_HUMAN	NEC1_HUMAN	RMI1_HUMAN	SRBP1_HUMAN	TXNIP_HUMAN	PHLD_HUMAN	TF7L2_HUMAN	HNF1B_HUMAN	EI2BD_HUMAN	A0A0A0MSU3_HUMAN	A0A0A0MQU7_HUMAN
biological_process	GO:0042733	embryonic digit morphogenesis	15	55	0.272727	0.954904	0.0819279	1	1	SALL1_HUMAN	LRP5_HUMAN	GRHL2_HUMAN	M3K20_HUMAN	C2CD3_HUMAN	CTNB1_HUMAN	BROMI_HUMAN	FREM2_HUMAN	INTU_HUMAN	CHSTB_HUMAN	GLI3_HUMAN	CBP_HUMAN	A0A5F9UQ55_HUMAN	A0A7I2PJA1_HUMAN	A0A494BZW6_HUMAN
biological_process	GO:0006368	transcription elongation from RNA polymerase II promoter	15	50	0.3	0.992452	0.0147257	1	1	RTF1_HUMAN	SPT6H_HUMAN	CTDP1_HUMAN	ELP2_HUMAN	ELL_HUMAN	PAF1_HUMAN	SETD2_HUMAN	SPT5H_HUMAN	CDK12_HUMAN	CDK13_HUMAN	ADRM1_HUMAN	ELL2_HUMAN	ERCC3_HUMAN	U3KQ90_HUMAN	B4DGJ5_HUMAN
biological_process	GO:0008630	intrinsic apoptotic signaling pathway in response to DNA damage	15	48	0.3125	0.994793	0.00951929	1	1	TOPRS_HUMAN	HTRA2_HUMAN	BCL2_HUMAN	BRCA1_HUMAN	ERCC6_HUMAN	E2F1_HUMAN	PML_HUMAN	FNIP2_HUMAN	CHK2_HUMAN	P85A_HUMAN	PRKDC_HUMAN	TNR1B_HUMAN	ATM_HUMAN	ABL1_HUMAN	B2CL1_HUMAN
biological_process	GO:0030866	cortical actin cytoskeleton organization	15	69	0.217391	0.608243	0.501358	1	1	TLN1_HUMAN	ROCK2_HUMAN	E41L2_HUMAN	FHOD3_HUMAN	ROCK1_HUMAN	AKA11_HUMAN	IKKB_HUMAN	A0A1B0GTW6_HUMAN	A0A2R8Y783_HUMAN	A0A2R8Y570_HUMAN	A0A0J9YWN0_HUMAN	A0A3B3IU06_HUMAN	A0A2U3TZH6_HUMAN	A0A2R8Y6D0_HUMAN	A0A3B3IUD6_HUMAN
biological_process	GO:0051016	barbed-end actin filament capping	15	46	0.326087	0.999051	0.00251668	1	1	SVIL_HUMAN	EPS8_HUMAN	AVIL_HUMAN	TARA_HUMAN	SCIN_HUMAN	TWF1_HUMAN	ADDB_HUMAN	ADDG_HUMAN	F5H3Q6_HUMAN	A0A2R8YE63_HUMAN	A0A2R8Y4W2_HUMAN	F5H2B8_HUMAN	F5H0R8_HUMAN	F5GYM8_HUMAN	F5H1B5_HUMAN
biological_process	GO:0034644	cellular response to UV	14	53	0.264151	0.728049	0.366936	1	1	ATR_HUMAN	DHX36_HUMAN	INO80_HUMAN	EP300_HUMAN	P53_HUMAN	P85A_HUMAN	NEDD4_HUMAN	TAF1_HUMAN	UBP28_HUMAN	N4BP1_HUMAN	NSE3_HUMAN	E2AK4_HUMAN	BMF_HUMAN	CBP_HUMAN
biological_process	GO:0043967	histone H4 acetylation	14	47	0.297872	0.966905	0.0577489	1	1	PER1_HUMAN	TRRAP_HUMAN	ING3_HUMAN	APBB1_HUMAN	EP400_HUMAN	EPC1_HUMAN	BRD8_HUMAN	KAT7_HUMAN	BRCA2_HUMAN	EP300_HUMAN	NCOA1_HUMAN	ZZZ3_HUMAN	ATF2_HUMAN	MO4L2_HUMAN
biological_process	GO:0033209	tumor necrosis factor-mediated signaling pathway	14	98	0.142857	0.288559	0.781432	1	1	PLVAP_HUMAN	K1C18_HUMAN	P53_HUMAN	RIPK1_HUMAN	TNR1B_HUMAN	TNR11_HUMAN	FOXO3_HUMAN	IKKB_HUMAN	CIKS_HUMAN	CAR14_HUMAN	G3V5Z7_HUMAN	G3V295_HUMAN	F5GX11_HUMAN	G3V3I1_HUMAN
biological_process	GO:0007519	skeletal muscle tissue development	14	53	0.264151	0.950422	0.0719887	1	1	SVIL_HUMAN	COT2_HUMAN	NPHN_HUMAN	MEF2C_HUMAN	EP300_HUMAN	NF1_HUMAN	SKIL_HUMAN	SIX4_HUMAN	ZBT18_HUMAN	VGLL2_HUMAN	HXD10_HUMAN	DMD_HUMAN	A0A075B6G3_HUMAN	B3KW44_HUMAN
biological_process	GO:0045747	positive regulation of Notch signaling pathway	14	43	0.325581	0.997707	0.00606537	1	1	BMP2K_HUMAN	NOTC1_HUMAN	EPN2_HUMAN	NOD2_HUMAN	NOS3_HUMAN	NEPRO_HUMAN	TGFB2_HUMAN	TM2D3_HUMAN	YAP1_HUMAN	ZMIZ1_HUMAN	P63_HUMAN	AAK1_HUMAN	IL6RB_HUMAN	GSX2_HUMAN
biological_process	GO:0030168	platelet activation	14	80	0.175	0.851365	0.199814	1	1	PK3CA_HUMAN	ATS13_HUMAN	DGKI_HUMAN	DGKQ_HUMAN	ITB3_HUMAN	VAV_HUMAN	SRF_HUMAN	UFO_HUMAN	VWF_HUMAN	E7EM72_HUMAN	E9PFX6_HUMAN	A0A087WV00_HUMAN	H0YA20_HUMAN	E7EWQ4_HUMAN
biological_process	GO:0032355	response to estradiol	14	93	0.150538	0.259359	0.810122	1	1	MAP1B_HUMAN	CDN1B_HUMAN	NCOR2_HUMAN	CTNB1_HUMAN	COT2_HUMAN	ARC1B_HUMAN	APOB_HUMAN	SC6A1_HUMAN	STA5B_HUMAN	TXNIP_HUMAN	UCN1_HUMAN	PTC1_HUMAN	GGT5_HUMAN	M0QZD8_HUMAN
biological_process	GO:0001932	regulation of protein phosphorylation	14	46	0.304348	0.998132	0.0023712	1	1	PLXB2_HUMAN	GRDN_HUMAN	KDM4D_HUMAN	DAPLE_HUMAN	FINC_HUMAN	APOA1_HUMAN	PML_HUMAN	FNIP2_HUMAN	IP3KB_HUMAN	ROP1L_HUMAN	STAT2_HUMAN	PIN1_HUMAN	BAKOR_HUMAN	CADM4_HUMAN
biological_process	GO:0071333	cellular response to glucose stimulus	14	58	0.241379	0.925012	0.110824	1	1	PK3CA_HUMAN	PAX2_HUMAN	SIN3A_HUMAN	MEN1_HUMAN	SRF_HUMAN	XBP1_HUMAN	UN13B_HUMAN	ZN236_HUMAN	ZBT20_HUMAN	ACE_HUMAN	FOXO3_HUMAN	ICAM1_HUMAN	NPTX1_HUMAN	A0A087X0K9_HUMAN
biological_process	GO:1902476	chloride transmembrane transport	14	84	0.166667	0.406999	0.699855	1	1	S12A7_HUMAN	S12A1_HUMAN	S12A2_HUMAN	S12A8_HUMAN	SC6A1_HUMAN	S12A6_HUMAN	ANO3_HUMAN	ANO5_HUMAN	ANO2_HUMAN	A0A6Q8PH21_HUMAN	H0YKE6_HUMAN	H0YKQ8_HUMAN	H0YMQ9_HUMAN	A0A0G2JNW7_HUMAN
biological_process	GO:0035176	social behavior	14	55	0.254545	0.932227	0.120559	1	1	PCM1_HUMAN	SHAN1_HUMAN	KCNQ1_HUMAN	BBS4_HUMAN	EXT1_HUMAN	CHD8_HUMAN	CNTP2_HUMAN	MKKS_HUMAN	UCN1_HUMAN	VP13A_HUMAN	ATX1_HUMAN	ATX1L_HUMAN	DLG4_HUMAN	CIC_HUMAN
biological_process	GO:0006919	activation of cysteine-type endopeptidase activity involved in apoptotic process	14	86	0.162791	0.331263	0.764848	1	1	NLRP1_HUMAN	SENP1_HUMAN	HIP1R_HUMAN	C8AP2_HUMAN	B2L13_HUMAN	PML_HUMAN	NOD1_HUMAN	TNF15_HUMAN	TNR16_HUMAN	ROBO1_HUMAN	XDH_HUMAN	RET_HUMAN	HIP1_HUMAN	DNJA3_HUMAN
biological_process	GO:0001938	positive regulation of endothelial cell proliferation	14	73	0.191781	0.637678	0.464605	1	1	PLXB3_HUMAN	HIF1A_HUMAN	ACVL1_HUMAN	ARNT_HUMAN	ITB3_HUMAN	EGF_HUMAN	NRP2_HUMAN	NF1_HUMAN	SCG2_HUMAN	STA5A_HUMAN	VEGFB_HUMAN	WNT2_HUMAN	NRARP_HUMAN	ECM1_HUMAN
biological_process	GO:1902895	positive regulation of miRNA transcription	14	45	0.311111	0.988098	0.0272863	1	1	HIF1A_HUMAN	EGR1_HUMAN	KLF5_HUMAN	MRTFA_HUMAN	NR1H2_HUMAN	P53_HUMAN	SRBP1_HUMAN	SRBP2_HUMAN	MRTFB_HUMAN	TNR16_HUMAN	SRF_HUMAN	WT1_HUMAN	TGFB2_HUMAN	FOXO3_HUMAN
biological_process	GO:0051216	cartilage development	14	60	0.233333	0.819387	0.230549	1	1	HIF1A_HUMAN	CH3L1_HUMAN	DLX2_HUMAN	PKD1_HUMAN	MKKS_HUMAN	SATB2_HUMAN	ZEB1_HUMAN	TAPT1_HUMAN	TRIPB_HUMAN	HXC4_HUMAN	EVC_HUMAN	DDRGK_HUMAN	A0A5F9UQ55_HUMAN	F6TDF5_HUMAN
biological_process	GO:0032436	positive regulation of proteasomal ubiquitin-dependent protein catabolic process	14	77	0.181818	0.879827	0.178775	1	1	AKIB1_HUMAN	AURKA_HUMAN	PRIC1_HUMAN	MTG16_HUMAN	NKD2_HUMAN	SIR2_HUMAN	RN180_HUMAN	SH3R1_HUMAN	MDM2_HUMAN	DAB2_HUMAN	TAF1_HUMAN	KEAP1_HUMAN	DDRGK_HUMAN	COP1_HUMAN
biological_process	GO:0031648	protein destabilization	14	49	0.285714	0.973662	0.0539932	1	1	RO52_HUMAN	SENP2_HUMAN	PEX2_HUMAN	DAPLE_HUMAN	HDAC6_HUMAN	EP300_HUMAN	SIR6_HUMAN	PRKDC_HUMAN	MDM2_HUMAN	XBP1_HUMAN	NR1D1_HUMAN	HD_HUMAN	GGA3_HUMAN	CBP_HUMAN
biological_process	GO:0048167	regulation of synaptic plasticity	14	50	0.28	0.966266	0.04915	1	1	SI1L1_HUMAN	HRH1_HUMAN	ERC2_HUMAN	AGRB1_HUMAN	MEF2C_HUMAN	RIMS2_HUMAN	SYGP1_HUMAN	RIMS1_HUMAN	X3CL1_HUMAN	RGRF1_HUMAN	RB6I2_HUMAN	KAT2A_HUMAN	LZTS1_HUMAN	BAIP2_HUMAN
biological_process	GO:0007032	endosome organization	14	42	0.333333	0.970873	0.0491189	1	1	PK3C3_HUMAN	DJC13_HUMAN	LTOR1_HUMAN	P4K2A_HUMAN	P4K2B_HUMAN	SQSTM_HUMAN	WASC4_HUMAN	VP33B_HUMAN	VPS11_HUMAN	AL2CL_HUMAN	HOOK3_HUMAN	CHM2B_HUMAN	ALS2_HUMAN	A0A3B3IRM0_HUMAN
biological_process	GO:0031016	pancreas development	14	38	0.368421	0.993374	0.0125569	1	1	MEIS2_HUMAN	CTNB1_HUMAN	NEC1_HUMAN	TF7L2_HUMAN	HNF1A_HUMAN	HNF1B_HUMAN	H0YND5_HUMAN	A0A0A0MTK8_HUMAN	F5H0K0_HUMAN	U3KQS6_HUMAN	A0A087WXS2_HUMAN	A0A087WZC2_HUMAN	E0YMJ8_HUMAN	A0A0C4DGS8_HUMAN
biological_process	GO:0002376	immune system process	14	62	0.225806	0.249136	0.76485	1	1	RUBIC_HUMAN	IRF8_HUMAN	FCG2A_HUMAN	CLM9_HUMAN	DDX17_HUMAN	PIBF1_HUMAN	SHIP2_HUMAN	SQSTM_HUMAN	OLR1_HUMAN	PSA1_HUMAN	PLD3_HUMAN	MYSM1_HUMAN	FAIM3_HUMAN	CLM8_HUMAN
biological_process	GO:0006486	protein glycosylation	14	252	0.0555556	3.05419e-08	1	0	1	EXT1_HUMAN	MA1B1_HUMAN	COG7_HUMAN	SIAT2_HUMAN	SIA7E_HUMAN	SIA7A_HUMAN	OST48_HUMAN	TRIPB_HUMAN	GOGA2_HUMAN	MA2A1_HUMAN	B4GT3_HUMAN	G3XAD9_HUMAN	E7EMU6_HUMAN	F2Z2C8_HUMAN
biological_process	GO:0008217	regulation of blood pressure	14	83	0.168675	0.0367615	0.976381	1	1	STK39_HUMAN	LRP5_HUMAN	ACVL1_HUMAN	KCNQ1_HUMAN	CMGA_HUMAN	ERAP1_HUMAN	EXT1_HUMAN	NOS3_HUMAN	MYH6_HUMAN	RENI_HUMAN	ACE_HUMAN	AMPN_HUMAN	CO1A2_HUMAN	CD34_HUMAN
biological_process	GO:0007129	homologous chromosome pairing at meiosis	14	37	0.378378	0.997362	0.00601001	1	1	MRE11_HUMAN	MAJIN_HUMAN	FACD2_HUMAN	KASH5_HUMAN	S6OS1_HUMAN	PRDM9_HUMAN	ZCPW1_HUMAN	SUN1_HUMAN	R212B_HUMAN	IHO1_HUMAN	NDC1_HUMAN	ANR31_HUMAN	A0A1W2PS94_HUMAN	A0A2R8Y358_HUMAN
biological_process	GO:0032757	positive regulation of interleukin-8 production	14	64	0.21875	0.814211	0.279215	1	1	CD244_HUMAN	APOA2_HUMAN	CH3L1_HUMAN	DDX58_HUMAN	NOD2_HUMAN	NOD1_HUMAN	NOS2_HUMAN	RIPK1_HUMAN	TLR1_HUMAN	TLR9_HUMAN	TLR3_HUMAN	NAL10_HUMAN	CLC7A_HUMAN	CD2_HUMAN
biological_process	GO:0050680	negative regulation of epithelial cell proliferation	14	57	0.245614	0.958406	0.0642802	1	1	PEX2_HUMAN	MAGD1_HUMAN	EPIPL_HUMAN	MTSS1_HUMAN	PAX6_HUMAN	MEN1_HUMAN	SOX2_HUMAN	DAB2_HUMAN	TGFB2_HUMAN	TGBR3_HUMAN	NLRC3_HUMAN	PTC1_HUMAN	ATF2_HUMAN	IFT74_HUMAN
biological_process	GO:0009617	response to bacterium	14	105	0.133333	0.0115606	0.991055	1	1	FR1L6_HUMAN	CC186_HUMAN	CHD7_HUMAN	ERAP1_HUMAN	BNIP3_HUMAN	NOS2_HUMAN	SCN7A_HUMAN	PRLR_HUMAN	TVA21_HUMAN	DHX58_HUMAN	HMCN1_HUMAN	CE192_HUMAN	BAIP2_HUMAN	FA20A_HUMAN
biological_process	GO:0032728	positive regulation of interferon-beta production	14	41	0.341463	0.995457	0.0118553	1	1	RIPK2_HUMAN	DHX9_HUMAN	DDX58_HUMAN	RN135_HUMAN	OAS3_HUMAN	RPC2_HUMAN	STING_HUMAN	TLR9_HUMAN	TLR3_HUMAN	ZBT20_HUMAN	ZCCHV_HUMAN	DHX58_HUMAN	ISG15_HUMAN	A0A0B4J1S7_HUMAN
biological_process	GO:0006821	chloride transport	14	153	0.0915033	0.00591697	0.996572	1	1	S26A1_HUMAN	B3AT_HUMAN	S26A8_HUMAN	WNK4_HUMAN	TTYH1_HUMAN	CLCA1_HUMAN	CLCA4_HUMAN	ANO5_HUMAN	CLCN6_HUMAN	A0A1B0GVW7_HUMAN	A0A1B0GUY6_HUMAN	A0A0G2JPK6_HUMAN	H0Y2M6_HUMAN	A0A3B3IRY0_HUMAN
biological_process	GO:0042307	positive regulation of protein import into nucleus	14	41	0.341463	0.995457	0.0118553	1	1	HCLS1_HUMAN	P85B_HUMAN	P85A_HUMAN	PLAK_HUMAN	TADBP_HUMAN	TPR_HUMAN	XBP1_HUMAN	ZC12A_HUMAN	UBR5_HUMAN	BAG3_HUMAN	IFNG_HUMAN	CHP2_HUMAN	GLI3_HUMAN	A0A0B4J1S7_HUMAN
biological_process	GO:0007080	mitotic metaphase plate congression	14	41	0.341463	0.932227	0.120559	1	1	CHM4C_HUMAN	CHMP7_HUMAN	KIF14_HUMAN	CHMP6_HUMAN	KIF22_HUMAN	PIBF1_HUMAN	NUP62_HUMAN	PSRC1_HUMAN	ANR53_HUMAN	KIFC1_HUMAN	KIF2C_HUMAN	CHM2B_HUMAN	CENPE_HUMAN	DCTN2_HUMAN
biological_process	GO:0055088	lipid homeostasis	14	53	0.264151	0.891358	0.148294	1	1	ANGL3_HUMAN	MDR3_HUMAN	NR1D2_HUMAN	PLPL8_HUMAN	PLPL1_HUMAN	PLPL3_HUMAN	USF1_HUMAN	NF2L1_HUMAN	ZBT20_HUMAN	ABCBB_HUMAN	AT132_HUMAN	ABCAC_HUMAN	ACACA_HUMAN	APOA4_HUMAN
biological_process	GO:0086091	regulation of heart rate by cardiac conduction	14	39	0.358974	0.997402	0.00729401	1	1	ANK2_HUMAN	KCNH6_HUMAN	KCNQ1_HUMAN	CAC1C_HUMAN	CACB2_HUMAN	CAC1G_HUMAN	BIN1_HUMAN	KCNH2_HUMAN	SCN5A_HUMAN	PLAK_HUMAN	PKP2_HUMAN	DESP_HUMAN	AKAP9_HUMAN	CA2D1_HUMAN
biological_process	GO:0002230	positive regulation of defense response to virus by host	14	36	0.388889	0.999	0.00317098	1	1	ERPG3_HUMAN	DDX58_HUMAN	PML_HUMAN	SIN3A_HUMAN	PARP9_HUMAN	STING_HUMAN	PTN22_HUMAN	ZC12A_HUMAN	IL23A_HUMAN	LIRB1_HUMAN	E2AK4_HUMAN	DTX3L_HUMAN	CIKS_HUMAN	A0A0B4J1S7_HUMAN
biological_process	GO:0034472	snRNA 3'-end processing	14	30	0.466667	0.990481	0.0225001	1	1	CT451_HUMAN	CT455_HUMAN	CT456_HUMAN	CT45A_HUMAN	INT2_HUMAN	INT5_HUMAN	INT12_HUMAN	CT452_HUMAN	CT453_HUMAN	CT457_HUMAN	CT458_HUMAN	CT459_HUMAN	TOE1_HUMAN	INT7_HUMAN
biological_process	GO:0050728	negative regulation of inflammatory response	13	99	0.131313	0.167538	0.881815	1	1	PE2R4_HUMAN	HGF_HUMAN	ENPP3_HUMAN	APOA1_HUMAN	GPS2_HUMAN	MMP26_HUMAN	BCR_HUMAN	NR1D2_HUMAN	LRFN5_HUMAN	OTUL_HUMAN	NLRC3_HUMAN	TNAP3_HUMAN	NR1D1_HUMAN
biological_process	GO:0006958	complement activation, classical pathway	13	171	0.0760234	3.94105e-05	0.999986	0.057	1	TRBC1_HUMAN	TRBC2_HUMAN	IGLL1_HUMAN	IGHA1_HUMAN	CFAI_HUMAN	C1RL_HUMAN	IGHA2_HUMAN	IC1_HUMAN	IGHD_HUMAN	IGHE_HUMAN	CO6_HUMAN	CO8A_HUMAN	F5GY80_HUMAN
biological_process	GO:0006446	regulation of translational initiation	13	37	0.351351	0.995757	0.00847465	1	1	EIF3K_HUMAN	IF4B_HUMAN	DDX1_HUMAN	IF4G1_HUMAN	IF4G2_HUMAN	IF4G3_HUMAN	CTIF_HUMAN	E2AK4_HUMAN	GLE1_HUMAN	ALKB1_HUMAN	K7EK53_HUMAN	A0A087WVB9_HUMAN	K7ERF1_HUMAN
biological_process	GO:0071320	cellular response to cAMP	13	56	0.232143	0.865077	0.21807	1	1	PDE2A_HUMAN	PDE4D_HUMAN	ITPR2_HUMAN	HCN1_HUMAN	KCNQ1_HUMAN	CRHBP_HUMAN	PK3CG_HUMAN	PKD2_HUMAN	WT1_HUMAN	AKAP6_HUMAN	CPSM_HUMAN	A4_HUMAN	AKAP9_HUMAN
biological_process	GO:0034097	response to cytokine	13	45	0.288889	0.995848	0.00519282	1	1	SYNJ1_HUMAN	MAPK2_HUMAN	BCL2_HUMAN	PML_HUMAN	SKIL_HUMAN	OSMR_HUMAN	SP100_HUMAN	SRF_HUMAN	OST48_HUMAN	TNR11_HUMAN	IL6RA_HUMAN	IL6RB_HUMAN	B2CL1_HUMAN
biological_process	GO:0006631	fatty acid metabolic process	13	122	0.106557	2.57193e-06	0.999999	0.007	1	PER2_HUMAN	ANGL3_HUMAN	FAS_HUMAN	LYPA1_HUMAN	MORC2_HUMAN	SGPL1_HUMAN	PLPL8_HUMAN	TENX_HUMAN	ABCBB_HUMAN	GGT5_HUMAN	ACSF3_HUMAN	ACSF4_HUMAN	A0A2R8YG21_HUMAN
biological_process	GO:0002931	response to ischemia	13	54	0.240741	0.892878	0.180282	1	1	PER2_HUMAN	ROCK2_HUMAN	ABRX2_HUMAN	BCL2_HUMAN	EGR1_HUMAN	CPEB4_HUMAN	MEF2C_HUMAN	P53_HUMAN	P2RX2_HUMAN	S26A5_HUMAN	SQSTM_HUMAN	X3CL1_HUMAN	A0A6Q8NVI4_HUMAN
biological_process	GO:1903078	positive regulation of protein localization to plasma membrane	13	54	0.240741	0.918072	0.138881	1	1	SRBS1_HUMAN	LRP1_HUMAN	KINH_HUMAN	ITA3_HUMAN	NKD2_HUMAN	P85A_HUMAN	SQSTM_HUMAN	STX4_HUMAN	SPTB2_HUMAN	WNK3_HUMAN	ARHGG_HUMAN	IFNG_HUMAN	AT2B4_HUMAN
biological_process	GO:0016485	protein processing	13	107	0.121495	0.00297228	0.998169	0.985	1	PK3C3_HUMAN	C2CD3_HUMAN	ATS13_HUMAN	ATS2_HUMAN	CBPD_HUMAN	DYHC2_HUMAN	DDI2_HUMAN	NEC1_HUMAN	PTC1_HUMAN	KELL_HUMAN	GLI3_HUMAN	ADA19_HUMAN	H0Y6T7_HUMAN
biological_process	GO:0031297	replication fork processing	13	44	0.295455	0.997579	0.00616472	1	1	TRAIP_HUMAN	RTEL1_HUMAN	ETAA1_HUMAN	MMS22_HUMAN	FANCM_HUMAN	ATR_HUMAN	WRN_HUMAN	RFWD3_HUMAN	TONSL_HUMAN	KHDC3_HUMAN	DDX11_HUMAN	BD1L1_HUMAN	E2QRD4_HUMAN
biological_process	GO:0010595	positive regulation of endothelial cell migration	13	62	0.209677	0.884951	0.167839	1	1	ROCK2_HUMAN	ANGP1_HUMAN	ANGP4_HUMAN	BCAR1_HUMAN	ITB3_HUMAN	EGF_HUMAN	NRP2_HUMAN	PK3CG_HUMAN	RIN2_HUMAN	SMOC2_HUMAN	PHLD_HUMAN	ZC12A_HUMAN	ABL1_HUMAN
biological_process	GO:0007565	female pregnancy	13	81	0.160494	0.592734	0.481525	1	1	MAGD2_HUMAN	FOSB_HUMAN	BCL2_HUMAN	CRHBP_HUMAN	GTR1_HUMAN	ITA2_HUMAN	PAPP1_HUMAN	STA5B_HUMAN	PRLHR_HUMAN	UCN1_HUMAN	PZP_HUMAN	ACE_HUMAN	ABCC8_HUMAN
biological_process	GO:0042472	inner ear morphogenesis	13	56	0.232143	0.969765	0.049332	1	1	PAX2_HUMAN	KCNQ1_HUMAN	CHD7_HUMAN	FZD3_HUMAN	BCR_HUMAN	SIX4_HUMAN	SPY2_HUMAN	DLX5_HUMAN	MYO6_HUMAN	HMX3_HUMAN	MYO15_HUMAN	DLX6_HUMAN	A0A6I8PRU0_HUMAN
biological_process	GO:0042789	mRNA transcription by RNA polymerase II	13	40	0.325	0.990642	0.0229589	1	1	TAF6_HUMAN	TAF8_HUMAN	SPT6H_HUMAN	EPAS1_HUMAN	MED1_HUMAN	SRBP1_HUMAN	TAF2_HUMAN	TAF4_HUMAN	TAF4B_HUMAN	NCOA1_HUMAN	TAF1_HUMAN	TBP_HUMAN	ATF2_HUMAN
biological_process	GO:0001658	branching involved in ureteric bud morphogenesis	13	41	0.317073	0.983509	0.0334964	1	1	PAX2_HUMAN	PBX1_HUMAN	SALL1_HUMAN	GRB1L_HUMAN	BCL2_HUMAN	CTNB1_HUMAN	EYA1_HUMAN	ATS16_HUMAN	LAMA5_HUMAN	PKD2_HUMAN	WT1_HUMAN	PTC1_HUMAN	GLI3_HUMAN
biological_process	GO:0050679	positive regulation of epithelial cell proliferation	13	63	0.206349	0.755156	0.305198	1	1	PAX2_HUMAN	NOTC1_HUMAN	LAMB1_HUMAN	EYA1_HUMAN	NOD2_HUMAN	PKHD1_HUMAN	SCN5A_HUMAN	SCND3_HUMAN	STOX1_HUMAN	DLX5_HUMAN	YAP1_HUMAN	TF7L2_HUMAN	DLX6_HUMAN
biological_process	GO:0009954	proximal/distal pattern formation	13	27	0.481481	0.999	0.00317098	1	1	PBX1_HUMAN	CTNB1_HUMAN	DLX1_HUMAN	GREM1_HUMAN	DLX2_HUMAN	PBX2_HUMAN	P63_HUMAN	HXD10_HUMAN	CHSS1_HUMAN	GLI1_HUMAN	GLI2_HUMAN	GLI3_HUMAN	A0A7I2PJA1_HUMAN
biological_process	GO:0032456	endocytic recycling	13	94	0.138298	0.323556	0.759382	1	1	STX6_HUMAN	LMTK2_HUMAN	K1109_HUMAN	EPG5_HUMAN	EIPR1_HUMAN	EPS15_HUMAN	VPS52_HUMAN	WAC2C_HUMAN	ANR27_HUMAN	MILK2_HUMAN	ANR50_HUMAN	GGA3_HUMAN	DEN1C_HUMAN
biological_process	GO:0051496	positive regulation of stress fiber assembly	13	53	0.245283	0.905374	0.16267	1	1	ROCK2_HUMAN	GRDN_HUMAN	LIMK1_HUMAN	EVL_HUMAN	APOA1_HUMAN	CARL1_HUMAN	LIMC1_HUMAN	VINEX_HUMAN	TSC1_HUMAN	MYOC_HUMAN	ARHG5_HUMAN	ABL1_HUMAN	AMOT_HUMAN
biological_process	GO:0006284	base-excision repair	13	63	0.206349	0.80859	0.273604	1	1	DNA2_HUMAN	HMGA1_HUMAN	ERCC6_HUMAN	SIR6_HUMAN	WRN_HUMAN	XRCC1_HUMAN	RFA2_HUMAN	HUWE1_HUMAN	DPOLQ_HUMAN	APEX2_HUMAN	F5H8D7_HUMAN	A0A5F9ZI14_HUMAN	H0YEI2_HUMAN
biological_process	GO:0006352	DNA-templated transcription, initiation	13	50	0.26	0.978319	0.031686	1	1	TAF6_HUMAN	TAF9B_HUMAN	NCOA6_HUMAN	TAF4_HUMAN	TBPL2_HUMAN	TBP_HUMAN	BRF2_HUMAN	V9GY14_HUMAN	Q7Z6S4_HUMAN	Q7Z6S5_HUMAN	A0A1B0GVC6_HUMAN	A0A0G2JRY5_HUMAN	J3KTH2_HUMAN
biological_process	GO:0050714	positive regulation of protein secretion	13	49	0.265306	0.449955	0.636558	1	1	SYTL4_HUMAN	TITIN_HUMAN	EXPH5_HUMAN	APBB1_HUMAN	FRM4A_HUMAN	NEC1_HUMAN	SC24A_HUMAN	TGFB2_HUMAN	UN13B_HUMAN	AT132_HUMAN	MY18A_HUMAN	MYH10_HUMAN	MYOM1_HUMAN
biological_process	GO:0006378	mRNA polyadenylation	13	46	0.282609	0.983699	0.0307875	1	1	PAPOB_HUMAN	PAPD1_HUMAN	PABP1_HUMAN	PAF1_HUMAN	PAPOA_HUMAN	CPSF1_HUMAN	PCF11_HUMAN	SCAF8_HUMAN	PAPD5_HUMAN	WDR33_HUMAN	A4_HUMAN	A0A6Q8JFT6_HUMAN	E9PNY7_HUMAN
biological_process	GO:0006911	phagocytosis, engulfment	13	117	0.111111	0.0301801	0.982797	1	1	TRBC1_HUMAN	TRBC2_HUMAN	IGLL1_HUMAN	IGHA1_HUMAN	ITAM_HUMAN	IGHA2_HUMAN	RHG25_HUMAN	MYH9_HUMAN	RHG12_HUMAN	IGHD_HUMAN	IGHE_HUMAN	DOCK1_HUMAN	CLC7A_HUMAN
biological_process	GO:0043627	response to estrogen	13	57	0.22807	0.863081	0.20605	1	1	TRI25_HUMAN	GSTM3_HUMAN	BRCA1_HUMAN	ARC1B_HUMAN	APOA2_HUMAN	KMT2D_HUMAN	EP300_HUMAN	TR11B_HUMAN	ZN366_HUMAN	ABCBB_HUMAN	NPT2B_HUMAN	GLI3_HUMAN	CTNA1_HUMAN
biological_process	GO:0018149	peptide cross-linking	13	46	0.282609	0.949109	0.0946259	1	1	EPB42_HUMAN	LORI_HUMAN	FINC_HUMAN	FILA_HUMAN	EVPL_HUMAN	K1C10_HUMAN	TGM7_HUMAN	TGM5_HUMAN	DESP_HUMAN	A0A087WZC4_HUMAN	A0A087WVW4_HUMAN	F5H563_HUMAN	A0A087WVS3_HUMAN
biological_process	GO:0006590	thyroid hormone generation	13	29	0.448276	0.997673	0.00692673	1	1	PERT_HUMAN	MED1_HUMAN	THYG_HUMAN	DUOX2_HUMAN	A0A0G2JR31_HUMAN	H0Y6H4_HUMAN	A0A0G2JR90_HUMAN	A0A0G2JR79_HUMAN	A0A0G2JP53_HUMAN	A0A0G2JRZ1_HUMAN	H7C1F5_HUMAN	A0A0G2JNN7_HUMAN	X6RAN8_HUMAN
biological_process	GO:0006997	nucleus organization	13	42	0.309524	0.998456	0.00275292	1	1	CHM4C_HUMAN	CHMP7_HUMAN	BIN1_HUMAN	CHK1_HUMAN	CHMP6_HUMAN	NUMA1_HUMAN	SYNE1_HUMAN	CHM2B_HUMAN	ATX7_HUMAN	I3L4A1_HUMAN	I3L3E4_HUMAN	A0A087WW88_HUMAN	I3L4G8_HUMAN
biological_process	GO:0048268	clathrin coat assembly	13	34	0.382353	0.998324	0.00521809	1	1	HIP1R_HUMAN	FCHO2_HUMAN	FCHO1_HUMAN	P3C2A_HUMAN	EPS15_HUMAN	DAB2_HUMAN	PICAL_HUMAN	AP2B1_HUMAN	HIP1_HUMAN	H0YD48_HUMAN	H0YEY8_HUMAN	H0YEH1_HUMAN	H0YE97_HUMAN
biological_process	GO:0045332	phospholipid translocation	13	43	0.302326	0.935322	0.105428	1	1	MDR1_HUMAN	ATP9A_HUMAN	MDR3_HUMAN	AT10A_HUMAN	AT10B_HUMAN	AT8A1_HUMAN	AT8B4_HUMAN	ABCA4_HUMAN	ATP9B_HUMAN	A0A669KBE2_HUMAN	H7C0E8_HUMAN	A0A669KB44_HUMAN	A0A669KAW0_HUMAN
biological_process	GO:0032715	negative regulation of interleukin-6 production	12	48	0.25	0.910878	0.158193	1	1	HGF_HUMAN	I27RA_HUMAN	IRAK3_HUMAN	SHIP1_HUMAN	PTN22_HUMAN	X3CL1_HUMAN	NLRC3_HUMAN	TNAP3_HUMAN	TLR9_HUMAN	ZC12A_HUMAN	BPI_HUMAN	A0A0B4J1S7_HUMAN
biological_process	GO:0071480	cellular response to gamma radiation	12	29	0.413793	0.999052	0.00337647	1	1	M3K20_HUMAN	EGR1_HUMAN	ATR_HUMAN	P53_HUMAN	CHK2_HUMAN	MDM2_HUMAN	WRN_HUMAN	YAP1_HUMAN	TREX1_HUMAN	TSYL5_HUMAN	ATM_HUMAN	B2CL1_HUMAN
biological_process	GO:0001756	somitogenesis	12	43	0.27907	0.987633	0.0244823	1	1	EP300_HUMAN	P53_HUMAN	PALB2_HUMAN	PRKDC_HUMAN	TBXT_HUMAN	SUH_HUMAN	XRCC2_HUMAN	ABI1_HUMAN	KAT2A_HUMAN	MIB1_HUMAN	ATM_HUMAN	J3KP65_HUMAN
biological_process	GO:0007528	neuromuscular junction development	12	31	0.387097	0.996318	0.00951919	1	1	LIPB2_HUMAN	CACB2_HUMAN	ANK3_HUMAN	P2RX2_HUMAN	NEDD4_HUMAN	UN13A_HUMAN	UN13B_HUMAN	UN13C_HUMAN	PZRN3_HUMAN	ALS2_HUMAN	AGRIN_HUMAN	DNJA3_HUMAN
biological_process	GO:0043124	negative regulation of I-kappaB kinase/NF-kappaB signaling	12	54	0.222222	0.819718	0.28092	1	1	PER1_HUMAN	TNIP3_HUMAN	CATIN_HUMAN	RIPK1_HUMAN	ZMY11_HUMAN	NLRC3_HUMAN	TNAP3_HUMAN	ZC12A_HUMAN	MABP1_HUMAN	NR1D1_HUMAN	ABL1_HUMAN	DNJA3_HUMAN
biological_process	GO:0051591	response to cAMP	12	36	0.333333	0.986748	0.0241656	1	1	PER1_HUMAN	FOSB_HUMAN	DGKQ_HUMAN	CNGA3_HUMAN	PRGC2_HUMAN	ODBB_HUMAN	SRBP1_HUMAN	PNPT1_HUMAN	SDC1_HUMAN	TYRO_HUMAN	RENI_HUMAN	DUOX2_HUMAN
biological_process	GO:0070936	protein K48-linked ubiquitination	12	64	0.1875	0.491068	0.632034	1	1	TOPRS_HUMAN	RNF6_HUMAN	HACE1_HUMAN	RN152_HUMAN	RNF8_HUMAN	RN115_HUMAN	RFFL_HUMAN	TNAP3_HUMAN	UBR5_HUMAN	AMFR_HUMAN	ITCH_HUMAN	DTX3L_HUMAN
biological_process	GO:2001237	negative regulation of extrinsic apoptotic signaling pathway	12	37	0.324324	0.998072	0.00394367	1	1	LMNA_HUMAN	BIRC6_HUMAN	RIPK1_HUMAN	SCG2_HUMAN	SRC8_HUMAN	SH3R1_HUMAN	YAP1_HUMAN	TF7L2_HUMAN	ZMY11_HUMAN	RBCC1_HUMAN	HD_HUMAN	ACVR1_HUMAN
biological_process	GO:0008219	cell death	12	38	0.315789	0.994055	0.00687449	1	1	SNCAP_HUMAN	M3K20_HUMAN	BNIP3_HUMAN	FAF1_HUMAN	CAC1A_HUMAN	RIPK1_HUMAN	NUP62_HUMAN	PLPL8_HUMAN	TGFB2_HUMAN	OLR1_HUMAN	IF4G2_HUMAN	ALS2_HUMAN
biological_process	GO:0046718	viral entry into host cell	12	35	0.342857	0.7451	0.347725	1	1	4F2_HUMAN	INSR_HUMAN	ITB3_HUMAN	EPS15_HUMAN	CD209_HUMAN	NECT1_HUMAN	WWP1_HUMAN	UFO_HUMAN	WWP2_HUMAN	ITCH_HUMAN	NU153_HUMAN	CLC4M_HUMAN
biological_process	GO:0009611	response to wounding	12	65	0.184615	0.930919	0.0833714	1	1	ITB4_HUMAN	AURKA_HUMAN	CCR2_HUMAN	FINC_HUMAN	PAX6_HUMAN	NMNA1_HUMAN	SOX2_HUMAN	TGFB2_HUMAN	PO5F1_HUMAN	VWF_HUMAN	DYST_HUMAN	GLI1_HUMAN
biological_process	GO:0009636	response to toxic substance	12	75	0.16	0.237861	0.819215	1	1	S6A14_HUMAN	ATS13_HUMAN	BCL2_HUMAN	ERCC6_HUMAN	GLYAT_HUMAN	SC6A1_HUMAN	WAPL_HUMAN	SDC1_HUMAN	SRF_HUMAN	TRPM6_HUMAN	CPSM_HUMAN	MBP_HUMAN
biological_process	GO:0000086	G2/M transition of mitotic cell cycle	12	57	0.210526	0.973179	0.0395695	1	1	AURKA_HUMAN	FBXL6_HUMAN	MDR1_HUMAN	GWL_HUMAN	CHK1_HUMAN	FOXM1_HUMAN	MPIP3_HUMAN	CTRO_HUMAN	NEST_HUMAN	CHK2_HUMAN	TAF2_HUMAN	A0A0D9SFF0_HUMAN
biological_process	GO:0006633	fatty acid biosynthetic process	12	67	0.179104	0.0745816	0.949452	1	1	BRCA1_HUMAN	FAS_HUMAN	XBP1_HUMAN	ACSM6_HUMAN	DHB8_HUMAN	LIPE_HUMAN	LIPC_HUMAN	ACACA_HUMAN	ACACB_HUMAN	ACSF3_HUMAN	A0A0U1RQF0_HUMAN	A0A0A0MQU7_HUMAN
biological_process	GO:1901215	negative regulation of neuron death	12	58	0.206897	0.966757	0.0477209	1	1	HTRA2_HUMAN	CMGA_HUMAN	NMNA1_HUMAN	PRGC1_HUMAN	TNR1B_HUMAN	UCN1_HUMAN	AT132_HUMAN	AP2B1_HUMAN	IF4G1_HUMAN	A4_HUMAN	CSF3_HUMAN	CD34_HUMAN
biological_process	GO:0051384	response to glucocorticoid	12	56	0.214286	0.178632	0.875098	1	1	PDCD7_HUMAN	TRI63_HUMAN	BCL2_HUMAN	APOA2_HUMAN	PRGC2_HUMAN	PAPP1_HUMAN	ODBB_HUMAN	NEC1_HUMAN	SDC1_HUMAN	UCN1_HUMAN	A2MG_HUMAN	ACBG1_HUMAN
biological_process	GO:0042102	positive regulation of T cell proliferation	12	67	0.179104	0.610814	0.487096	1	1	LIRB2_HUMAN	JAK3_HUMAN	CAR11_HUMAN	DHYS_HUMAN	CC88B_HUMAN	CD209_HUMAN	TYK2_HUMAN	PTPRC_HUMAN	ZP4_HUMAN	IL23A_HUMAN	IL6RB_HUMAN	DNJA3_HUMAN
biological_process	GO:0030593	neutrophil chemotaxis	12	80	0.15	0.0948684	0.943423	1	1	PDE4B_HUMAN	SRP54_HUMAN	ITA1_HUMAN	CCL21_HUMAN	GBF1_HUMAN	FYV1_HUMAN	PI51C_HUMAN	CSF3R_HUMAN	PK3CG_HUMAN	VAV_HUMAN	TGFB2_HUMAN	X3CL1_HUMAN
biological_process	GO:0009267	cellular response to starvation	12	72	0.166667	0.851541	0.197946	1	1	STK24_HUMAN	KLF10_HUMAN	SRBP1_HUMAN	SRBP2_HUMAN	WRN_HUMAN	WIPI4_HUMAN	TNR6A_HUMAN	UBP33_HUMAN	BAKOR_HUMAN	MYH13_HUMAN	JMY_HUMAN	EHMT2_HUMAN
biological_process	GO:0071363	cellular response to growth factor stimulus	12	56	0.214286	0.889982	0.128841	1	1	LRP2_HUMAN	MAP1B_HUMAN	ACVL1_HUMAN	HTRA2_HUMAN	INSR_HUMAN	CTNB1_HUMAN	ANGP2_HUMAN	RIPK1_HUMAN	STA5B_HUMAN	TNR1B_HUMAN	ACVR1_HUMAN	AMHR2_HUMAN
biological_process	GO:0071230	cellular response to amino acid stimulus	12	61	0.196721	0.667766	0.439129	1	1	ROAA_HUMAN	LTOR1_HUMAN	CPEB4_HUMAN	ZEB1_HUMAN	XBP1_HUMAN	NTRK2_HUMAN	CO1A2_HUMAN	CO4A6_HUMAN	CO5A2_HUMAN	B2CL1_HUMAN	F6TDF5_HUMAN	F5GX19_HUMAN
biological_process	GO:0048477	oogenesis	12	38	0.315789	0.979917	0.0337404	1	1	MARF1_HUMAN	DDX20_HUMAN	KASH5_HUMAN	FMN2_HUMAN	KMT2D_HUMAN	MEIOS_HUMAN	S6OS1_HUMAN	TAF4B_HUMAN	ASPM_HUMAN	HORM1_HUMAN	IHO1_HUMAN	G8JLP4_HUMAN
biological_process	GO:0034260	negative regulation of GTPase activity	12	32	0.375	0.997192	0.00855798	1	1	PLXB3_HUMAN	GMIP_HUMAN	BBS4_HUMAN	BIG1_HUMAN	MKKS_HUMAN	SPY1_HUMAN	TTC8_HUMAN	SPY2_HUMAN	WNK1_HUMAN	U17L2_HUMAN	TSC1_HUMAN	AMOT_HUMAN
biological_process	GO:0060021	roof of mouth development	12	65	0.184615	0.467872	0.638159	1	1	PKHA1_HUMAN	BNC2_HUMAN	BROMI_HUMAN	INTU_HUMAN	SGPL1_HUMAN	SATB2_HUMAN	PARPT_HUMAN	DLX5_HUMAN	BCOR_HUMAN	GLI3_HUMAN	DLX6_HUMAN	A0A494BZW6_HUMAN
biological_process	GO:0006874	cellular calcium ion homeostasis	12	118	0.101695	0.000110092	0.999936	0.133	1	RMD3_HUMAN	ANK2_HUMAN	CCR2_HUMAN	NCKX1_HUMAN	PKHD1_HUMAN	TRPM8_HUMAN	AT2B2_HUMAN	AT2C1_HUMAN	AT131_HUMAN	AT132_HUMAN	KELL_HUMAN	AT2B4_HUMAN
biological_process	GO:0001736	establishment of planar polarity	12	26	0.461538	0.993819	0.0109429	1	1	FTM_HUMAN	FZD3_HUMAN	INTU_HUMAN	TTC8_HUMAN	P63_HUMAN	CELR1_HUMAN	H3BS47_HUMAN	H3BPF5_HUMAN	A0A7P0TB06_HUMAN	H3BV03_HUMAN	A0A494BZW6_HUMAN	A0A087WX34_HUMAN
biological_process	GO:0051497	negative regulation of stress fiber assembly	12	28	0.428571	0.999372	0.00237169	1	1	LIPA1_HUMAN	ARHGI_HUMAN	CGNL1_HUMAN	P85A_HUMAN	RHG28_HUMAN	RHG06_HUMAN	ZO1_HUMAN	RHPN2_HUMAN	MYOC_HUMAN	CLAP1_HUMAN	CLAP2_HUMAN	A0A087X0K9_HUMAN
biological_process	GO:0050890	cognition	12	53	0.226415	0.964985	0.047214	1	1	SETD5_HUMAN	RTL4_HUMAN	CHD7_HUMAN	GP155_HUMAN	NCHL1_HUMAN	NIPBL_HUMAN	NF1_HUMAN	SHRM4_HUMAN	TM11E_HUMAN	CHM2B_HUMAN	CUX2_HUMAN	A4_HUMAN
biological_process	GO:0031214	biomineral tissue development	12	29	0.413793	0.565406	0.509209	1	1	AMELY_HUMAN	AMTN_HUMAN	ENAM_HUMAN	DSPP_HUMAN	ENPP1_HUMAN	DMP1_HUMAN	KLK4_HUMAN	TFP11_HUMAN	ECM1_HUMAN	AMBN_HUMAN	FA20A_HUMAN	A0A087WV21_HUMAN
biological_process	GO:0006968	cellular defense response	12	53	0.226415	0.819718	0.28092	1	1	KI2L4_HUMAN	LIRB2_HUMAN	CCR2_HUMAN	GNLY_HUMAN	CCR9_HUMAN	NCF1_HUMAN	NCTR2_HUMAN	PERF_HUMAN	MNDA_HUMAN	NCF2_HUMAN	ZN148_HUMAN	FAIM3_HUMAN
biological_process	GO:0006890	retrograde vesicle-mediated transport, Golgi to endoplasmic reticulum	12	73	0.164384	0.361481	0.746399	1	1	ATP9A_HUMAN	DJC28_HUMAN	COPE_HUMAN	GBF1_HUMAN	COPB2_HUMAN	COG7_HUMAN	STX18_HUMAN	SCYL1_HUMAN	ATP9B_HUMAN	HD_HUMAN	F8VVA7_HUMAN	M0QXB4_HUMAN
biological_process	GO:0007029	endoplasmic reticulum organization	12	41	0.292683	0.282434	0.795939	1	1	SC31B_HUMAN	LMAN1_HUMAN	ATLA3_HUMAN	ATLA2_HUMAN	GAK_HUMAN	SC16B_HUMAN	SC16A_HUMAN	SC31A_HUMAN	TGO1_HUMAN	TOIP2_HUMAN	ATLA1_HUMAN	Q5TA12_HUMAN
biological_process	GO:0008333	endosome to lysosome transport	12	47	0.255319	0.922534	0.134923	1	1	KI13A_HUMAN	BIN1_HUMAN	EPG5_HUMAN	PCDG3_HUMAN	SCYL2_HUMAN	RN157_HUMAN	TGFA1_HUMAN	VPS16_HUMAN	VPS11_HUMAN	BAKOR_HUMAN	HOOK3_HUMAN	DTX3L_HUMAN
biological_process	GO:0060071	Wnt signaling pathway, planar cell polarity pathway	12	71	0.169014	0.72976	0.362322	1	1	PRIC2_HUMAN	FZD3_HUMAN	PRIC1_HUMAN	SMUF1_HUMAN	SMUF2_HUMAN	CELR1_HUMAN	CELR2_HUMAN	MED12_HUMAN	G3V5Z7_HUMAN	G3V295_HUMAN	F5GX11_HUMAN	G3V3I1_HUMAN
biological_process	GO:0006334	nucleosome assembly	12	155	0.0774194	0.00122991	0.999443	0.807	1	SART3_HUMAN	KAT6A_HUMAN	DAXX_HUMAN	CAF1B_HUMAN	TSYL4_HUMAN	TSYL5_HUMAN	KAT6B_HUMAN	H2AW_HUMAN	A0A3B3IRI4_HUMAN	A0A3B3ISI1_HUMAN	A0A3F2YNX6_HUMAN	A0A3B3IS53_HUMAN
biological_process	GO:0042254	ribosome biogenesis	12	58	0.206897	0.0991697	0.921565	1	1	I20L2_HUMAN	BOP1_HUMAN	MTG2_HUMAN	MBB1A_HUMAN	DDX31_HUMAN	XPO1_HUMAN	URB2_HUMAN	ZN658_HUMAN	NAF1_HUMAN	DHX37_HUMAN	E9PFK5_HUMAN	M0QX73_HUMAN
biological_process	GO:0046580	negative regulation of Ras protein signal transduction	12	35	0.342857	0.992565	0.0158744	1	1	RASL3_HUMAN	SIN1_HUMAN	NUP62_HUMAN	SYGP1_HUMAN	SPY1_HUMAN	SPY2_HUMAN	SPY3_HUMAN	TGFB2_HUMAN	B7ZCA0_HUMAN	A0A0A0MQZ2_HUMAN	A0A2R8Y6T2_HUMAN	A0A2R8YDS2_HUMAN
biological_process	GO:0006891	intra-Golgi vesicle-mediated transport	12	42	0.285714	0.988098	0.0272863	1	1	TPC10_HUMAN	COG2_HUMAN	CASP_HUMAN	COPE_HUMAN	COPB2_HUMAN	COG1_HUMAN	COG5_HUMAN	COG6_HUMAN	COPB_HUMAN	A0A087WVI0_HUMAN	A0A096LPH7_HUMAN	E9PBL8_HUMAN
biological_process	GO:0030514	negative regulation of BMP signaling pathway	12	56	0.214286	0.74114	0.375042	1	1	LRP2_HUMAN	NOTC1_HUMAN	CTSL2_HUMAN	DLX1_HUMAN	GREM1_HUMAN	SMUF1_HUMAN	SMUF2_HUMAN	SKIL_HUMAN	TMPS6_HUMAN	HIPK2_HUMAN	CER1_HUMAN	ABL1_HUMAN
biological_process	GO:0006605	protein targeting	12	41	0.292683	0.289111	0.754184	1	1	TRAK2_HUMAN	HAP1_HUMAN	LTBP2_HUMAN	KTNB1_HUMAN	ERBIN_HUMAN	AP4E1_HUMAN	PML_HUMAN	SNG1_HUMAN	NUP54_HUMAN	AKAP6_HUMAN	HOME3_HUMAN	AP4M1_HUMAN
biological_process	GO:0031146	SCF-dependent proteasomal ubiquitin-dependent protein catabolic process	12	102	0.117647	0.0452433	0.976125	1	1	FBXL4_HUMAN	FBXL6_HUMAN	KIF14_HUMAN	CUL2_HUMAN	FBXL5_HUMAN	FBXW4_HUMAN	WWTR1_HUMAN	CCNF_HUMAN	G3V5Z7_HUMAN	G3V295_HUMAN	F5GX11_HUMAN	G3V3I1_HUMAN
biological_process	GO:0051402	neuron apoptotic process	12	45	0.266667	0.946458	0.0730949	1	1	NLRP1_HUMAN	BCL2_HUMAN	BNIP3_HUMAN	OXR1_HUMAN	CTRO_HUMAN	P53_HUMAN	TNR16_HUMAN	P63_HUMAN	A4_HUMAN	ATM_HUMAN	ATN1_HUMAN	B2CL1_HUMAN
biological_process	GO:0048488	synaptic vesicle endocytosis	12	46	0.26087	0.995235	0.0100427	1	1	SYNJ1_HUMAN	STON2_HUMAN	AP2M1_HUMAN	K1109_HUMAN	FCHO2_HUMAN	BIN1_HUMAN	PI51C_HUMAN	RB27B_HUMAN	AP2B1_HUMAN	AMPH_HUMAN	A0A0D9SGJ6_HUMAN	J3KQV8_HUMAN
biological_process	GO:0045214	sarcomere organization	12	56	0.214286	0.79887	0.302075	1	1	TITIN_HUMAN	LMOD2_HUMAN	FHOD3_HUMAN	OBSCN_HUMAN	MYH3_HUMAN	SIX4_HUMAN	MYH6_HUMAN	SRF_HUMAN	MYOM2_HUMAN	MYPN_HUMAN	A0A669KB11_HUMAN	A0A669KAU6_HUMAN
biological_process	GO:0010977	negative regulation of neuron projection development	12	65	0.184615	0.851569	0.202386	1	1	KANK1_HUMAN	DCC_HUMAN	FKBP4_HUMAN	GAK_HUMAN	MNAR1_HUMAN	STX1B_HUMAN	DAB2_HUMAN	PTPRO_HUMAN	PRAG1_HUMAN	TSC1_HUMAN	DEN5A_HUMAN	K7ELL7_HUMAN
biological_process	GO:0045773	positive regulation of axon extension	12	33	0.363636	0.99654	0.00935836	1	1	MAP1B_HUMAN	CDKL5_HUMAN	LIMK1_HUMAN	GOGA4_HUMAN	MACF1_HUMAN	FINC_HUMAN	SRF_HUMAN	IF4G2_HUMAN	DREB_HUMAN	CADH4_HUMAN	ADNP_HUMAN	D3DQV9_HUMAN
biological_process	GO:0045599	negative regulation of fat cell differentiation	12	52	0.230769	0.819718	0.28092	1	1	LRP3_HUMAN	FOG2_HUMAN	ENPP1_HUMAN	E2F1_HUMAN	GPS2_HUMAN	SIR2_HUMAN	TRIO_HUMAN	WWTR1_HUMAN	TGFI1_HUMAN	YAP1_HUMAN	ANR26_HUMAN	ASXL1_HUMAN
biological_process	GO:0032731	positive regulation of interleukin-1 beta production	12	61	0.196721	0.675608	0.447835	1	1	NLRP1_HUMAN	RIPK2_HUMAN	MALT1_HUMAN	EGR1_HUMAN	GSDMD_HUMAN	NOD2_HUMAN	NOD1_HUMAN	MNDA_HUMAN	IF16_HUMAN	IFNG_HUMAN	A4_HUMAN	CLC7A_HUMAN
biological_process	GO:0034063	stress granule assembly	12	42	0.285714	0.942787	0.109622	1	1	TIA1_HUMAN	LS14A_HUMAN	DDX6_HUMAN	GRB7_HUMAN	PRC2C_HUMAN	YTHD2_HUMAN	YTHD3_HUMAN	UBP2L_HUMAN	ATX2L_HUMAN	ATX2_HUMAN	DYHC1_HUMAN	BICD1_HUMAN
biological_process	GO:0043408	regulation of MAPK cascade	12	33	0.363636	0.922405	0.0924367	1	1	TNIK_HUMAN	SYGP1_HUMAN	STK4_HUMAN	VRK2_HUMAN	TAOK3_HUMAN	ULK4_HUMAN	TAOK2_HUMAN	PHLP1_HUMAN	NRK_HUMAN	RENI_HUMAN	MYOC_HUMAN	M4K4_HUMAN
biological_process	GO:0018108	peptidyl-tyrosine phosphorylation	11	54	0.203704	0.714176	0.338545	1	1	FES_HUMAN	INSR_HUMAN	JAK3_HUMAN	EGF_HUMAN	PTN4_HUMAN	RELN_HUMAN	ABI1_HUMAN	ABI2_HUMAN	FBLN3_HUMAN	BTK_HUMAN	ABL1_HUMAN
biological_process	GO:0001819	positive regulation of cytokine production	11	68	0.161765	0.959609	0.0511998	1	1	PE2R4_HUMAN	TMF1_HUMAN	IRAK3_HUMAN	KLRF2_HUMAN	CC88B_HUMAN	PK3CG_HUMAN	TXK_HUMAN	IF16_HUMAN	IFNG_HUMAN	KAT2A_HUMAN	CLC9A_HUMAN
biological_process	GO:0060326	cell chemotaxis	11	67	0.164179	0.0117065	0.992221	1	1	PLXB3_HUMAN	HGF_HUMAN	EPHB1_HUMAN	BCAR1_HUMAN	CCL21_HUMAN	CCR2_HUMAN	CCR9_HUMAN	EGLN_HUMAN	X3CL1_HUMAN	ARHGG_HUMAN	DOCK4_HUMAN
biological_process	GO:0050804	modulation of chemical synaptic transmission	11	64	0.171875	0.867979	0.159643	1	1	PTPRD_HUMAN	EPHB1_HUMAN	NEB1_HUMAN	GRID2_HUMAN	BCR_HUMAN	CAC1A_HUMAN	IQEC2_HUMAN	RELN_HUMAN	CAC1B_HUMAN	AKA12_HUMAN	ABR_HUMAN
biological_process	GO:0071560	cellular response to transforming growth factor beta stimulus	11	60	0.183333	0.875175	0.15816	1	1	PDE2A_HUMAN	ACVL1_HUMAN	E41L5_HUMAN	DLX1_HUMAN	MEF2C_HUMAN	DAB2_HUMAN	ZEB1_HUMAN	TETN_HUMAN	WNT2_HUMAN	ABL1_HUMAN	F6TDF5_HUMAN
biological_process	GO:0070555	response to interleukin-1	11	35	0.314286	0.422324	0.651583	1	1	TRI63_HUMAN	RIPK2_HUMAN	IRAK3_HUMAN	CH3L1_HUMAN	NEC1_HUMAN	TNR11_HUMAN	YTDC2_HUMAN	TLE5_HUMAN	IGBP1_HUMAN	IRAK1_HUMAN	A4_HUMAN
biological_process	GO:0000184	nuclear-transcribed mRNA catabolic process, nonsense-mediated decay	11	61	0.180328	0.741606	0.365222	1	1	SMG8_HUMAN	SMG1_HUMAN	RENT1_HUMAN	DCP1A_HUMAN	DHX34_HUMAN	PABP1_HUMAN	SMG7_HUMAN	CTIF_HUMAN	E9PD50_HUMAN	J3KRA9_HUMAN	B1ALB4_HUMAN
biological_process	GO:0006417	regulation of translation	11	103	0.106796	0.998374	0.00230347	1	1	MAPK5_HUMAN	DNJC1_HUMAN	PTCD3_HUMAN	TCOF_HUMAN	TSC1_HUMAN	FOXO3_HUMAN	A4_HUMAN	GEMI5_HUMAN	ATX2_HUMAN	EI2BD_HUMAN	H3BVC9_HUMAN
biological_process	GO:0061001	regulation of dendritic spine morphogenesis	11	25	0.44	0.999121	0.00242139	1	1	PDLI5_HUMAN	SI1L1_HUMAN	LIPA2_HUMAN	LZTS3_HUMAN	RHG44_HUMAN	SRCN1_HUMAN	TANC2_HUMAN	ABI2_HUMAN	A0A590UJ70_HUMAN	A0A087X165_HUMAN	A0A087WVV7_HUMAN
biological_process	GO:0007173	epidermal growth factor receptor signaling pathway	11	47	0.234043	0.940022	0.0920879	1	1	PK3CA_HUMAN	ERBIN_HUMAN	BCAR1_HUMAN	CAMLG_HUMAN	FA83B_HUMAN	GRB7_HUMAN	P3C2A_HUMAN	EGF_HUMAN	REPS2_HUMAN	FBLN3_HUMAN	ABL1_HUMAN
biological_process	GO:0070534	protein K63-linked ubiquitination	11	48	0.229167	0.976831	0.045096	1	1	RO52_HUMAN	MAGL2_HUMAN	RN135_HUMAN	RN152_HUMAN	RN213_HUMAN	RNF8_HUMAN	NEDD4_HUMAN	RN115_HUMAN	WWP2_HUMAN	ITCH_HUMAN	CIKS_HUMAN
biological_process	GO:0045815	epigenetic maintenance of chromatin in transcription-competent conformation	11	25	0.44	0.999301	0.00278657	1	1	PHF2_HUMAN	SMRD1_HUMAN	SRTD2_HUMAN	ARI1B_HUMAN	ARI1A_HUMAN	CHK1_HUMAN	KAT2B_HUMAN	EP300_HUMAN	ZMIZ2_HUMAN	ZMIZ1_HUMAN	A0A6Q8JFT6_HUMAN
biological_process	GO:0048208	COPII vesicle coating	11	33	0.333333	0.97679	0.0534287	1	1	PEF1_HUMAN	KLH12_HUMAN	SC16B_HUMAN	SC16A_HUMAN	TFG_HUMAN	A0A0C4DH09_HUMAN	A0A3F2YNZ0_HUMAN	A0A6Q8PFY7_HUMAN	X6RGP5_HUMAN	A0A3F2YNX0_HUMAN	F1T0I1_HUMAN
biological_process	GO:0032743	positive regulation of interleukin-2 production	11	36	0.305556	0.97679	0.0534287	1	1	PDE4B_HUMAN	PDE4D_HUMAN	RIPK2_HUMAN	MALT1_HUMAN	CCR2_HUMAN	CAR11_HUMAN	STA5B_HUMAN	SPTB2_HUMAN	PTPRC_HUMAN	CLC7A_HUMAN	ABL1_HUMAN
biological_process	GO:0034454	microtubule anchoring at centrosome	11	26	0.423077	0.998376	0.00569471	1	1	PCM1_HUMAN	BBS4_HUMAN	NINL_HUMAN	NIN_HUMAN	HOOK3_HUMAN	A0A5H1ZRS1_HUMAN	E9PN67_HUMAN	H9KV85_HUMAN	H0YBA1_HUMAN	A0A4W8VX11_HUMAN	C9J066_HUMAN
biological_process	GO:0006959	humoral immune response	11	69	0.15942	3.85208e-05	0.999979	0.055	1	AIRE_HUMAN	BCL2_HUMAN	NOTC1_HUMAN	CCR2_HUMAN	MEF2C_HUMAN	SUH_HUMAN	PO2F2_HUMAN	TNFB_HUMAN	YTHD2_HUMAN	IFNG_HUMAN	CIKS_HUMAN
biological_process	GO:0043525	positive regulation of neuron apoptotic process	11	49	0.22449	0.83733	0.258556	1	1	ITA1_HUMAN	CTNB1_HUMAN	P53_HUMAN	NF1_HUMAN	TGFB2_HUMAN	AP2B_HUMAN	ATF2_HUMAN	FOXO3_HUMAN	A4_HUMAN	ATM_HUMAN	ABL1_HUMAN
biological_process	GO:0048146	positive regulation of fibroblast proliferation	11	49	0.22449	0.80427	0.305406	1	1	FINC_HUMAN	E2F1_HUMAN	DHX9_HUMAN	PML_HUMAN	SIR6_HUMAN	TNR16_HUMAN	WAPL_HUMAN	WNT2_HUMAN	ZMIZ1_HUMAN	CDC6_HUMAN	ABL1_HUMAN
biological_process	GO:0043588	skin development	11	39	0.282051	0.930185	0.0904151	1	1	ATS2_HUMAN	ITA3_HUMAN	K1C9_HUMAN	PKD1_HUMAN	PTC2_HUMAN	PLAK_HUMAN	DESP_HUMAN	AP2B_HUMAN	ABCB6_HUMAN	CO5A2_HUMAN	CIKS_HUMAN
biological_process	GO:0071526	semaphorin-plexin signaling pathway	11	34	0.323529	0.959134	0.0828067	1	1	PLXA3_HUMAN	PLXA4_HUMAN	PLXB1_HUMAN	PLXB2_HUMAN	PLXB3_HUMAN	PLXD1_HUMAN	SEM4A_HUMAN	SEM4G_HUMAN	SEM4D_HUMAN	SEM3B_HUMAN	SEM6C_HUMAN
biological_process	GO:0097352	autophagosome maturation	11	41	0.268293	0.944715	0.0994362	1	1	PK3C3_HUMAN	STX17_HUMAN	LIX1_HUMAN	CHM4C_HUMAN	CHMP7_HUMAN	CHMP6_HUMAN	EPG5_HUMAN	UBQL1_HUMAN	VPS16_HUMAN	BAKOR_HUMAN	CHM2B_HUMAN
biological_process	GO:0006270	DNA replication initiation	11	52	0.211538	0.932556	0.115719	1	1	LRWD1_HUMAN	ORC3_HUMAN	MCM3_HUMAN	MCM10_HUMAN	PRI2_HUMAN	CDC6_HUMAN	DPOLA_HUMAN	J3KQ69_HUMAN	A0A499FHX9_HUMAN	Q5T670_HUMAN	A6NMQ1_HUMAN
biological_process	GO:0006811	ion transport	11	145	0.0758621	4.5386e-05	0.999965	0.061	1	S12A7_HUMAN	S12A1_HUMAN	S26A1_HUMAN	KCNN3_HUMAN	LASP1_HUMAN	NCKX1_HUMAN	S12A2_HUMAN	S12A6_HUMAN	WNK4_HUMAN	WNK1_HUMAN	B4DFN3_HUMAN
biological_process	GO:0007611	learning or memory	11	61	0.180328	0.938089	0.082563	1	1	LIRB2_HUMAN	AFF2_HUMAN	CRHBP_HUMAN	MEF2C_HUMAN	EP300_HUMAN	EGR2_HUMAN	PTPRZ_HUMAN	PICAL_HUMAN	AMFR_HUMAN	A4_HUMAN	DYH11_HUMAN
biological_process	GO:0031667	response to nutrient levels	11	47	0.234043	0.451009	0.596402	1	1	PAX2_HUMAN	CP8B1_HUMAN	FOXO4_HUMAN	NR1H2_HUMAN	NEC1_HUMAN	ZEB1_HUMAN	ACE_HUMAN	KAT2A_HUMAN	ACACB_HUMAN	CHSS1_HUMAN	F6TDF5_HUMAN
biological_process	GO:0009411	response to UV	11	47	0.234043	0.877521	0.168101	1	1	RO60_HUMAN	ERCC6_HUMAN	ERCC5_HUMAN	PML_HUMAN	MEN1_HUMAN	SPRTN_HUMAN	USF1_HUMAN	UBE4B_HUMAN	TYRO_HUMAN	DTL_HUMAN	ERCC3_HUMAN
biological_process	GO:0009306	protein secretion	11	60	0.183333	0.980754	0.0259729	1	1	LTBP2_HUMAN	PDIA4_HUMAN	SCG2_HUMAN	MIA2_HUMAN	TGO1_HUMAN	CTGE4_HUMAN	CTGE9_HUMAN	CTGE6_HUMAN	CTGE8_HUMAN	CTGEF_HUMAN	A0A2R8YE69_HUMAN
biological_process	GO:0030048	actin filament-based movement	11	24	0.458333	0.998234	0.00312302	1	1	MYH4_HUMAN	MYH3_HUMAN	WIPF3_HUMAN	MYH9_HUMAN	MYO5A_HUMAN	MYH10_HUMAN	MYO6_HUMAN	MYO7A_HUMAN	MYO9B_HUMAN	M0R300_HUMAN	M0R0P8_HUMAN
biological_process	GO:0006405	RNA export from nucleus	11	19	0.578947	0.933335	0.097831	1	1	NPAP1_HUMAN	P12L2_HUMAN	NU214_HUMAN	P121C_HUMAN	NUP62_HUMAN	P121B_HUMAN	TPR_HUMAN	XPO5_HUMAN	P121A_HUMAN	NU153_HUMAN	NU188_HUMAN
biological_process	GO:0007612	learning	11	61	0.180328	0.940652	0.0865692	1	1	SYNJ1_HUMAN	INSR_HUMAN	CNTP2_HUMAN	NTRK2_HUMAN	ATX1_HUMAN	ATX1L_HUMAN	DLG4_HUMAN	AT8A1_HUMAN	E2AK4_HUMAN	A4_HUMAN	CIC_HUMAN
biological_process	GO:0048538	thymus development	11	45	0.244444	0.922532	0.140925	1	1	PBX1_HUMAN	JARD2_HUMAN	BCL2_HUMAN	CTNB1_HUMAN	SIX4_HUMAN	SRF_HUMAN	TYRO_HUMAN	RAF1_HUMAN	ASXL1_HUMAN	ATM_HUMAN	ABL1_HUMAN
biological_process	GO:0071347	cellular response to interleukin-1	11	81	0.135802	0.141412	0.902024	1	1	RENT1_HUMAN	HIF1A_HUMAN	CATIN_HUMAN	CCL21_HUMAN	ATS7_HUMAN	X3CL1_HUMAN	ZC12A_HUMAN	NR1D1_HUMAN	RC3H1_HUMAN	ATS12_HUMAN	AKA12_HUMAN
biological_process	GO:0008306	associative learning	11	34	0.323529	0.979248	0.0376212	1	1	SHAN1_HUMAN	ELAV4_HUMAN	SC6A1_HUMAN	TENR_HUMAN	SRF_HUMAN	UCN1_HUMAN	RELN_HUMAN	TSC1_HUMAN	ASIC1_HUMAN	A4_HUMAN	ABL1_HUMAN
biological_process	GO:0009953	dorsal/ventral pattern formation	11	39	0.282051	0.972558	0.0470832	1	1	LMX1B_HUMAN	ACVL1_HUMAN	DYHC2_HUMAN	PTC1_HUMAN	HXB2_HUMAN	HXA2_HUMAN	ACVR1_HUMAN	GLI1_HUMAN	DSCL1_HUMAN	A0A2R8YGX0_HUMAN	A0A7I2V4X9_HUMAN
biological_process	GO:0042110	T cell activation	11	50	0.22	0.965634	0.0433785	1	1	CD8A_HUMAN	GRP1_HUMAN	LY9_HUMAN	SLAF6_HUMAN	PK3CG_HUMAN	OST48_HUMAN	PTPRC_HUMAN	NLRC3_HUMAN	HSH2D_HUMAN	CLC7A_HUMAN	CD2_HUMAN
biological_process	GO:0030218	erythrocyte differentiation	11	52	0.211538	0.88744	0.158303	1	1	DSRAD_HUMAN	HCLS1_HUMAN	KMT2E_HUMAN	KCNQ1_HUMAN	JAK3_HUMAN	EPAS1_HUMAN	PKNX1_HUMAN	UFL1_HUMAN	ACINU_HUMAN	CDIN1_HUMAN	HIPK2_HUMAN
biological_process	GO:1905606	regulation of presynapse assembly	11	34	0.323529	0.97679	0.0534287	1	1	SLIK4_HUMAN	PTPRD_HUMAN	MDGA1_HUMAN	LRFN5_HUMAN	SLIK2_HUMAN	SLIK3_HUMAN	NTRK3_HUMAN	IF4G1_HUMAN	A4_HUMAN	FARP1_HUMAN	B3KTY4_HUMAN
biological_process	GO:0001974	blood vessel remodeling	11	35	0.314286	0.98516	0.0340646	1	1	ACVL1_HUMAN	CCR2_HUMAN	CHD7_HUMAN	EPAS1_HUMAN	EXT1_HUMAN	MEF2C_HUMAN	NOS3_HUMAN	MDM2_HUMAN	SUH_HUMAN	UFO_HUMAN	ACE_HUMAN
biological_process	GO:0016239	positive regulation of macroautophagy	11	33	0.333333	0.998269	0.00386274	1	1	RUFY4_HUMAN	HIF1A_HUMAN	LARP1_HUMAN	BNIP3_HUMAN	SESN3_HUMAN	SPT5H_HUMAN	STING_HUMAN	WAC_HUMAN	TSC1_HUMAN	TSC2_HUMAN	C9J235_HUMAN
biological_process	GO:0030511	positive regulation of transforming growth factor beta receptor signaling pathway	11	31	0.354839	0.993598	0.0181454	1	1	SNW1_HUMAN	RN111_HUMAN	ING2_HUMAN	EP300_HUMAN	MEN1_HUMAN	DAB2_HUMAN	TGFI1_HUMAN	TGBR3_HUMAN	MYCD_HUMAN	HIPK2_HUMAN	CBP_HUMAN
biological_process	GO:0043434	response to peptide hormone	11	48	0.229167	0.994534	0.00767963	1	1	LRP6_HUMAN	CDN1B_HUMAN	BTG1_HUMAN	REG1B_HUMAN	NEC1_HUMAN	STAT4_HUMAN	STA5B_HUMAN	STA5A_HUMAN	STAT2_HUMAN	REG1A_HUMAN	EI2BD_HUMAN
biological_process	GO:0032722	positive regulation of chemokine production	11	46	0.23913	0.760615	0.339476	1	1	RIPK2_HUMAN	HIF1A_HUMAN	AIRE_HUMAN	EGR1_HUMAN	TLR9_HUMAN	TLR3_HUMAN	TSLP_HUMAN	IL6RA_HUMAN	IFNG_HUMAN	A4_HUMAN	D6RA51_HUMAN
biological_process	GO:0032793	positive regulation of CREB transcription factor activity	11	27	0.407407	0.998376	0.00569471	1	1	CRTC1_HUMAN	CRTC3_HUMAN	TSSK4_HUMAN	RELN_HUMAN	CRTC2_HUMAN	AGRF1_HUMAN	H0YDQ8_HUMAN	M0QX46_HUMAN	Q5T4K5_HUMAN	H0YK33_HUMAN	M0QXN6_HUMAN
biological_process	GO:0006749	glutathione metabolic process	11	118	0.0932203	0.00010892	0.999961	0.131	1	GSTM3_HUMAN	GSTM2_HUMAN	GSTM4_HUMAN	OPLA_HUMAN	E9PHN6_HUMAN	E9PHN7_HUMAN	F6XZQ7_HUMAN	A0A0A0MR85_HUMAN	E9PLF1_HUMAN	H0Y6A7_HUMAN	A0A0A0MTN3_HUMAN
biological_process	GO:0000079	regulation of cyclin-dependent protein serine/threonine kinase activity	11	52	0.211538	0.943688	0.0912311	1	1	GTPB4_HUMAN	CDN1B_HUMAN	MPIP3_HUMAN	TF2H1_HUMAN	CDC6_HUMAN	CCNB3_HUMAN	CCNK_HUMAN	CCNT1_HUMAN	HERC5_HUMAN	CCND3_HUMAN	CCNF_HUMAN
biological_process	GO:0007020	microtubule nucleation	11	44	0.25	0.942251	0.0954894	1	1	SLAI1_HUMAN	SLAI2_HUMAN	RANB9_HUMAN	GOGA2_HUMAN	AKAP9_HUMAN	CENPJ_HUMAN	CLAP1_HUMAN	CLAP2_HUMAN	GCP4_HUMAN	GCP6_HUMAN	H3BNL9_HUMAN
biological_process	GO:1903779	regulation of cardiac conduction	11	31	0.354839	0.99575	0.0116492	1	1	TNI3K_HUMAN	AT2B2_HUMAN	AT2B4_HUMAN	A0A3B3ITQ1_HUMAN	A0A3B3IU04_HUMAN	A0A3F2YNW8_HUMAN	A0A0X1KG73_HUMAN	A0A0U1RRH1_HUMAN	A0A3B3ITU8_HUMAN	A0A087X080_HUMAN	A0A3B3IU05_HUMAN
biological_process	GO:0031424	keratinization	10	81	0.123457	0.0701894	0.961171	1	1	K1C16_HUMAN	LORI_HUMAN	K1C17_HUMAN	EVPL_HUMAN	PPHLN_HUMAN	TRHY_HUMAN	KAZRN_HUMAN	ABCAC_HUMAN	HORN_HUMAN	A0A087WXQ9_HUMAN
biological_process	GO:0007159	leukocyte cell-cell adhesion	10	30	0.333333	0.815161	0.221348	1	1	PECA1_HUMAN	URP2_HUMAN	ITAL_HUMAN	CD209_HUMAN	ROCK1_HUMAN	OLR1_HUMAN	PTPRC_HUMAN	ICAM1_HUMAN	CLC4M_HUMAN	APOA4_HUMAN
biological_process	GO:0007269	neurotransmitter secretion	10	44	0.227273	0.429413	0.643843	1	1	LIPA3_HUMAN	SNPH_HUMAN	STXB3_HUMAN	SYN1_HUMAN	UN13A_HUMAN	SYN3_HUMAN	A0A0C4DGR7_HUMAN	A0A0A0MR68_HUMAN	A0A087WV00_HUMAN	A0A0C4DGR8_HUMAN
biological_process	GO:0043153	entrainment of circadian clock by photoperiod	10	30	0.333333	0.986022	0.0366721	1	1	PER1_HUMAN	PER2_HUMAN	PER3_HUMAN	CRY1_HUMAN	CRTC1_HUMAN	FBXL6_HUMAN	PML_HUMAN	P53_HUMAN	SIK1_HUMAN	UBP2_HUMAN
biological_process	GO:0010608	posttranscriptional regulation of gene expression	10	27	0.37037	0.99521	0.00624835	1	1	PER1_HUMAN	LARP1_HUMAN	E41L5_HUMAN	MATR3_HUMAN	PARP9_HUMAN	PUM1_HUMAN	BAKOR_HUMAN	RC3H1_HUMAN	ACE_HUMAN	MET16_HUMAN
biological_process	GO:0030855	epithelial cell differentiation	10	75	0.133333	0.995951	0.00531318	1	1	K2C3_HUMAN	K1C14_HUMAN	CDHR2_HUMAN	ANXA7_HUMAN	DLX5_HUMAN	WT1_HUMAN	TGFI1_HUMAN	DLX3_HUMAN	CNN3_HUMAN	DLX6_HUMAN
biological_process	GO:0006006	glucose metabolic process	10	66	0.151515	0.175078	0.866061	1	1	PGM2_HUMAN	PK3CA_HUMAN	BRAT1_HUMAN	KBTB2_HUMAN	HECD4_HUMAN	KCNQ1_HUMAN	DCXR_HUMAN	SHIP2_HUMAN	AP2B_HUMAN	GDPP1_HUMAN
biological_process	GO:0030890	positive regulation of B cell proliferation	10	43	0.232558	0.847282	0.256286	1	1	BCL2_HUMAN	FCRL3_HUMAN	CAR11_HUMAN	ATAD5_HUMAN	MEF2C_HUMAN	TFE2_HUMAN	PTPRC_HUMAN	TNR4_HUMAN	NFAC2_HUMAN	TLR9_HUMAN
biological_process	GO:0009612	response to mechanical stimulus	10	50	0.2	0.98622	0.0208175	1	1	PE2R4_HUMAN	MAP1B_HUMAN	FOSB_HUMAN	MEIS2_HUMAN	ANGP2_HUMAN	CH3L1_HUMAN	TXNIP_HUMAN	PIEZ2_HUMAN	PTC1_HUMAN	CLCN6_HUMAN
biological_process	GO:0048041	focal adhesion assembly	10	27	0.37037	0.998604	0.00306574	1	1	PEAK1_HUMAN	SRBS1_HUMAN	BCL2_HUMAN	ITA2_HUMAN	BCR_HUMAN	SRC8_HUMAN	TRIP6_HUMAN	RHG06_HUMAN	THSD1_HUMAN	TAOK2_HUMAN
biological_process	GO:0010942	positive regulation of cell death	10	37	0.27027	0.935638	0.077983	1	1	RIPK2_HUMAN	LRP1_HUMAN	CDN1B_HUMAN	KTNB1_HUMAN	APC_HUMAN	CELF1_HUMAN	FAF1_HUMAN	NOD1_HUMAN	ZC12A_HUMAN	IF4G1_HUMAN
biological_process	GO:0070527	platelet aggregation	10	47	0.212766	0.877776	0.189292	1	1	URP2_HUMAN	TPOR_HUMAN	TLN1_HUMAN	FINC_HUMAN	ITB3_HUMAN	PK3CG_HUMAN	STXB3_HUMAN	MYH9_HUMAN	I3L4X8_HUMAN	H3BM21_HUMAN
biological_process	GO:0043409	negative regulation of MAPK cascade	10	40	0.25	0.948947	0.073271	1	1	DUS7_HUMAN	DUS8_HUMAN	DUS6_HUMAN	DUS16_HUMAN	P85B_HUMAN	NF1_HUMAN	PRD15_HUMAN	STYL2_HUMAN	SPY3_HUMAN	DUS9_HUMAN
biological_process	GO:0098586	cellular response to virus	10	49	0.204082	0.935322	0.105428	1	1	HIF1A_HUMAN	DSRAD_HUMAN	EXT1_HUMAN	GBF1_HUMAN	PO2F2_HUMAN	TLR3_HUMAN	ZC12A_HUMAN	WDFY4_HUMAN	ATF2_HUMAN	GLI2_HUMAN
biological_process	GO:0051592	response to calcium ion	10	53	0.188679	0.899324	0.139662	1	1	PEF1_HUMAN	TITIN_HUMAN	ITPR3_HUMAN	NEC1_HUMAN	SC6A1_HUMAN	NEDD4_HUMAN	SC31A_HUMAN	SDC1_HUMAN	TXNIP_HUMAN	HOME1_HUMAN
biological_process	GO:0050982	detection of mechanical stimulus	10	13	0.769231	0.997483	0.0061974	1	1	PK2L1_HUMAN	PK1L1_HUMAN	PK1L2_HUMAN	PK1L3_HUMAN	PKD1_HUMAN	PLAK_HUMAN	PKD2_HUMAN	PIEZ2_HUMAN	PIEZ1_HUMAN	ANO3_HUMAN
biological_process	GO:0010951	negative regulation of endopeptidase activity	10	52	0.192308	0.418347	0.665984	1	1	TICN3_HUMAN	KNG1_HUMAN	SPI2_HUMAN	SPA12_HUMAN	SPA9_HUMAN	SPB7_HUMAN	ZPI_HUMAN	NEUS_HUMAN	FETUB_HUMAN	IC1_HUMAN
biological_process	GO:0031100	animal organ regeneration	10	37	0.27027	0.965315	0.0629675	1	1	HGF_HUMAN	MPRI_HUMAN	NOTC1_HUMAN	ANGP2_HUMAN	APOA2_HUMAN	MED1_HUMAN	NNMT_HUMAN	TGBR3_HUMAN	UFO_HUMAN	ACE_HUMAN
biological_process	GO:0097009	energy homeostasis	10	40	0.25	0.897317	0.186853	1	1	PK3CA_HUMAN	CRTC1_HUMAN	ALK_HUMAN	NMU_HUMAN	NR1D2_HUMAN	CRTC3_HUMAN	SQSTM_HUMAN	PRGC1_HUMAN	IF4G1_HUMAN	ACACB_HUMAN
biological_process	GO:0008542	visual learning	10	43	0.232558	0.847282	0.256286	1	1	HIF1A_HUMAN	DDHD2_HUMAN	HRH1_HUMAN	MEIS2_HUMAN	NETO1_HUMAN	NF1_HUMAN	SYGP1_HUMAN	TANC1_HUMAN	ABCC8_HUMAN	A4_HUMAN
biological_process	GO:0006935	chemotaxis	10	143	0.0699301	0.875247	0.144937	1	1	PLPL9_HUMAN	FES_HUMAN	ECSCR_HUMAN	CCR2_HUMAN	CCR9_HUMAN	RNAS2_HUMAN	X3CL1_HUMAN	DOCK2_HUMAN	AMOT_HUMAN	H0YLH9_HUMAN
biological_process	GO:0007608	sensory perception of smell	10	111	0.0900901	0.00144263	0.99942	0.844	1	OR8D2_HUMAN	BBS4_HUMAN	OR4D1_HUMAN	MKKS_HUMAN	TTC8_HUMAN	OR7A5_HUMAN	OR1D5_HUMAN	OR9Q1_HUMAN	NAV2_HUMAN	ADCY3_HUMAN
biological_process	GO:0017157	regulation of exocytosis	10	59	0.169492	0.238777	0.810828	1	1	PCLO_HUMAN	LGI3_HUMAN	HAP1_HUMAN	RIMS2_HUMAN	STX1B_HUMAN	STX4_HUMAN	RPGF4_HUMAN	F8W6W8_HUMAN	A0A0J9YWD4_HUMAN	A0A590UJL1_HUMAN
biological_process	GO:0034453	microtubule anchoring	10	37	0.27027	0.997878	0.00493722	1	1	PCM1_HUMAN	CE350_HUMAN	CC187_HUMAN	GCC2_HUMAN	PEX14_HUMAN	SAXO1_HUMAN	CLAP1_HUMAN	CLAP2_HUMAN	A0A075B739_HUMAN	A0A1W2PQX5_HUMAN
biological_process	GO:0002027	regulation of heart rate	10	35	0.285714	0.958832	0.0669599	1	1	PDE4D_HUMAN	ANK2_HUMAN	EPAS1_HUMAN	SCN5A_HUMAN	MDM2_HUMAN	MYH6_HUMAN	TNI3K_HUMAN	MYH7_HUMAN	DMD_HUMAN	A0A075B6G3_HUMAN
biological_process	GO:0061952	midbody abscission	10	34	0.294118	0.963884	0.0801092	1	1	KI20A_HUMAN	CHM4C_HUMAN	CHMP7_HUMAN	CEP55_HUMAN	CHMP6_HUMAN	CHM2B_HUMAN	I3L4A1_HUMAN	I3L3E4_HUMAN	A0A087WW88_HUMAN	I3L4G8_HUMAN
biological_process	GO:0016540	protein autoprocessing	10	34	0.294118	0.963884	0.0801092	1	1	HTRA2_HUMAN	CATE_HUMAN	NEC1_HUMAN	SPRTN_HUMAN	MYRF_HUMAN	A0A6Q8PHM1_HUMAN	A0A7I2V4K7_HUMAN	A0A7I2V480_HUMAN	A0A7I2V648_HUMAN	A0A7P0MPN9_HUMAN
biological_process	GO:0043010	camera-type eye development	10	42	0.238095	0.987121	0.0180084	1	1	PAX2_HUMAN	GRHL2_HUMAN	LAMA1_HUMAN	CAC1C_HUMAN	FBN2_HUMAN	PKNX1_HUMAN	MITF_HUMAN	CE290_HUMAN	WT1_HUMAN	FBLN3_HUMAN
biological_process	GO:0048536	spleen development	10	33	0.30303	0.963884	0.0801092	1	1	PBX1_HUMAN	JARD2_HUMAN	EPB42_HUMAN	BCL2_HUMAN	NKX23_HUMAN	RC3H1_HUMAN	RC3H2_HUMAN	RBM15_HUMAN	CIKS_HUMAN	ABL1_HUMAN
biological_process	GO:0003151	outflow tract morphogenesis	10	45	0.222222	0.897275	0.161217	1	1	PLXD1_HUMAN	HIF1A_HUMAN	NOTC1_HUMAN	EYA1_HUMAN	MEF2C_HUMAN	NIPBL_HUMAN	SC24B_HUMAN	SUH_HUMAN	TGBR3_HUMAN	ATF2_HUMAN
biological_process	GO:0007616	long-term memory	10	35	0.285714	0.955805	0.0944748	1	1	PJA2_HUMAN	SHAN1_HUMAN	LDLR_HUMAN	SRF_HUMAN	RELN_HUMAN	RGRF1_HUMAN	GRIA1_HUMAN	KAT2A_HUMAN	E2AK4_HUMAN	EHMT2_HUMAN
biological_process	GO:0000132	establishment of mitotic spindle orientation	10	32	0.3125	0.976833	0.055643	1	1	GPSM2_HUMAN	MCPH1_HUMAN	CK5P2_HUMAN	PAX6_HUMAN	NUMA1_HUMAN	PKHD1_HUMAN	SPY1_HUMAN	SAPC2_HUMAN	SPY2_HUMAN	HD_HUMAN
biological_process	GO:0007094	mitotic spindle assembly checkpoint signaling	10	45	0.222222	0.678487	0.439713	1	1	BUB1B_HUMAN	APC_HUMAN	CENPF_HUMAN	BUB1_HUMAN	KNTC1_HUMAN	TEX14_HUMAN	TPR_HUMAN	ZWINT_HUMAN	ATM_HUMAN	A0A590UK50_HUMAN
biological_process	GO:0060612	adipose tissue development	10	31	0.322581	0.859075	0.234936	1	1	PK3CA_HUMAN	UROL1_HUMAN	LRP5_HUMAN	PAXI1_HUMAN	PRGC1_HUMAN	XBP1_HUMAN	ZN516_HUMAN	ATF2_HUMAN	COE2_HUMAN	AMER1_HUMAN
biological_process	GO:0001890	placenta development	10	37	0.27027	0.981174	0.029904	1	1	CDN1B_HUMAN	FBN2_HUMAN	E2F7_HUMAN	PLAC1_HUMAN	DLX3_HUMAN	E2F8_HUMAN	CCNF_HUMAN	ADA19_HUMAN	ALKB1_HUMAN	A0A0A0MQU7_HUMAN
biological_process	GO:0060412	ventricular septum morphogenesis	10	34	0.294118	0.897317	0.186853	1	1	ROBO2_HUMAN	NOTC1_HUMAN	FOG2_HUMAN	NOS3_HUMAN	ROBO1_HUMAN	TGFB2_HUMAN	SUH_HUMAN	TGBR3_HUMAN	RBM15_HUMAN	ACVR1_HUMAN
biological_process	GO:0006189	'de novo' IMP biosynthetic process	10	23	0.434783	0.998788	0.00478661	1	1	PUR6_HUMAN	PUR8_HUMAN	A0A096LNY6_HUMAN	A0A0A6YY92_HUMAN	A0A1B0GTJ7_HUMAN	E9PBS1_HUMAN	A0A1B0GWJ0_HUMAN	A0A7P0Z472_HUMAN	A0A7P0T8E4_HUMAN	D6RF62_HUMAN
biological_process	GO:0006412	translation	10	524	0.019084	4.65458e-12	1	0	1	RT30_HUMAN	RRBP1_HUMAN	DHYS_HUMAN	SYHM_HUMAN	SMBP2_HUMAN	IF4G1_HUMAN	NACA_HUMAN	GEMI5_HUMAN	J3QLS3_HUMAN	D6RDU9_HUMAN
biological_process	GO:0006814	sodium ion transport	10	101	0.0990099	0.31855	0.735402	1	1	S17A4_HUMAN	S38AA_HUMAN	SCN5A_HUMAN	SCN7A_HUMAN	SCNBA_HUMAN	ASIC1_HUMAN	NPT3_HUMAN	G3XAL9_HUMAN	A0A2R8Y6V7_HUMAN	F5GWV6_HUMAN
biological_process	GO:0061844	antimicrobial humoral immune response mediated by antimicrobial peptide	10	103	0.0970874	0.00939364	0.995826	1	1	SEMG1_HUMAN	KNG1_HUMAN	CCL21_HUMAN	GNLY_HUMAN	REG1B_HUMAN	REG1A_HUMAN	PGRP4_HUMAN	TSLP_HUMAN	A4_HUMAN	BPI_HUMAN
biological_process	GO:2001240	negative regulation of extrinsic apoptotic signaling pathway in absence of ligand	10	35	0.285714	0.955805	0.0944748	1	1	BCL2_HUMAN	EYA1_HUMAN	RIPK1_HUMAN	NRG1_HUMAN	X3CL1_HUMAN	UNC5B_HUMAN	B2CL1_HUMAN	CTNA1_HUMAN	EYA4_HUMAN	EYA3_HUMAN
biological_process	GO:0021549	cerebellum development	10	44	0.227273	0.990201	0.0177333	1	1	TTBK2_HUMAN	HAP1_HUMAN	GABT_HUMAN	FTM_HUMAN	CNTN1_HUMAN	P53_HUMAN	SCN5A_HUMAN	SSR3_HUMAN	MYO16_HUMAN	A0A494BZW6_HUMAN
biological_process	GO:0007249	I-kappaB kinase/NF-kappaB signaling	10	75	0.133333	0.724332	0.324214	1	1	RIPK2_HUMAN	ROCK2_HUMAN	M3K14_HUMAN	CAR11_HUMAN	ROCK1_HUMAN	NLRC3_HUMAN	TLR9_HUMAN	IKKB_HUMAN	BTK_HUMAN	H0Y858_HUMAN
biological_process	GO:0006513	protein monoubiquitination	10	46	0.217391	0.692796	0.405828	1	1	RO52_HUMAN	TRI25_HUMAN	TOPRS_HUMAN	MARH7_HUMAN	KLH12_HUMAN	UBE3D_HUMAN	HUWE1_HUMAN	DTL_HUMAN	C9JRG9_HUMAN	C9JHG1_HUMAN
biological_process	GO:0030277	maintenance of gastrointestinal epithelium	10	20	0.5	0.994305	0.0174057	1	1	MUC4_HUMAN	CRACD_HUMAN	NOD2_HUMAN	PBLD_HUMAN	MUC2_HUMAN	MUC6_HUMAN	VSIG1_HUMAN	TLR9_HUMAN	A0A0G2JNJ8_HUMAN	A0A0G2JN42_HUMAN
biological_process	GO:0042744	hydrogen peroxide catabolic process	10	32	0.3125	0.955805	0.0944748	1	1	PERT_HUMAN	PXDN_HUMAN	PXDNL_HUMAN	DUOX2_HUMAN	APOA4_HUMAN	A0A0G2JR31_HUMAN	A0A0G2JR90_HUMAN	A0A0G2JP53_HUMAN	A0A0G2JRZ1_HUMAN	H7C1F5_HUMAN
biological_process	GO:0010634	positive regulation of epithelial cell migration	10	34	0.294118	0.931282	0.0994129	1	1	HIF1A_HUMAN	HDAC6_HUMAN	ITA3_HUMAN	E41L5_HUMAN	ITA2_HUMAN	TGFB2_HUMAN	IFNG_HUMAN	DOCK1_HUMAN	CLAP1_HUMAN	CLAP2_HUMAN
biological_process	GO:0032418	lysosome localization	10	30	0.333333	0.872828	0.19141	1	1	SYTL4_HUMAN	MAP6_HUMAN	JIP4_HUMAN	KINH_HUMAN	HDAC6_HUMAN	LTOR1_HUMAN	PKHM2_HUMAN	VP33B_HUMAN	MYH9_HUMAN	KLC2_HUMAN
biological_process	GO:0045860	positive regulation of protein kinase activity	10	57	0.175439	0.954866	0.0593716	1	1	TAB2_HUMAN	M3K12_HUMAN	DAXX_HUMAN	CCL21_HUMAN	PTPRC_HUMAN	MRNIP_HUMAN	RELN_HUMAN	ALS2_HUMAN	CENPE_HUMAN	DAB1_HUMAN
biological_process	GO:0006612	protein targeting to membrane	10	53	0.188679	0.0421055	0.97437	1	1	NCF1_HUMAN	FYV1_HUMAN	NACP4_HUMAN	RTP3_HUMAN	VP37A_HUMAN	PARD3_HUMAN	TAOK2_HUMAN	NACA2_HUMAN	NACAD_HUMAN	NACAM_HUMAN
biological_process	GO:0006865	amino acid transport	10	78	0.128205	0.00171441	0.999178	0.883	1	S6A15_HUMAN	S6A14_HUMAN	4F2_HUMAN	SLC31_HUMAN	S2548_HUMAN	S6A12_HUMAN	S38A5_HUMAN	A0A7P0Z4P5_HUMAN	H0YFS2_HUMAN	J3KPF3_HUMAN
biological_process	GO:0031069	hair follicle morphogenesis	10	30	0.333333	0.986022	0.0366721	1	1	BCL2_HUMAN	NOTC1_HUMAN	CTNB1_HUMAN	EXT1_HUMAN	K1C17_HUMAN	INTU_HUMAN	TNR16_HUMAN	TGFB2_HUMAN	P63_HUMAN	GLI2_HUMAN
biological_process	GO:2000463	positive regulation of excitatory postsynaptic potential	10	28	0.357143	0.995302	0.0139783	1	1	SHAN1_HUMAN	NETO1_HUMAN	RIMS2_HUMAN	STX1B_HUMAN	RIMS1_HUMAN	RELN_HUMAN	DLG4_HUMAN	CUX2_HUMAN	A4_HUMAN	BAIP2_HUMAN
biological_process	GO:0070372	regulation of ERK1 and ERK2 cascade	10	28	0.357143	0.0254172	0.982569	1	1	EPHB1_HUMAN	FINC_HUMAN	FA83D_HUMAN	GRP1_HUMAN	PKHD1_HUMAN	ROS1_HUMAN	CEAM1_HUMAN	NEK10_HUMAN	ANM5_HUMAN	Q5H8Y1_HUMAN
biological_process	GO:0030217	T cell differentiation	10	35	0.285714	0.996453	0.00539141	1	1	RUNX2_HUMAN	SP3_HUMAN	EGR1_HUMAN	CHD7_HUMAN	PKNX1_HUMAN	VAV_HUMAN	PTN22_HUMAN	PTPRC_HUMAN	CIKS_HUMAN	A0A0B4J1S7_HUMAN
biological_process	GO:0007288	sperm axoneme assembly	10	27	0.37037	0.994305	0.0174057	1	1	DYH1_HUMAN	FSIP2_HUMAN	CF206_HUMAN	CF157_HUMAN	DRC7_HUMAN	CFA43_HUMAN	CFA47_HUMAN	CFA65_HUMAN	CP131_HUMAN	CFA58_HUMAN
biological_process	GO:0042098	T cell proliferation	10	24	0.416667	0.772826	0.282555	1	1	RIPK2_HUMAN	MALT1_HUMAN	GRP1_HUMAN	PK3CG_HUMAN	PTPRC_HUMAN	TNR4_HUMAN	RC3H1_HUMAN	RC3H2_HUMAN	IL23A_HUMAN	CCND3_HUMAN
biological_process	GO:0050871	positive regulation of B cell activation	10	97	0.103093	0.529127	0.549988	1	1	SH3K1_HUMAN	TRBC1_HUMAN	TRBC2_HUMAN	IGLL1_HUMAN	IGHA1_HUMAN	IGHA2_HUMAN	NOD2_HUMAN	TLR9_HUMAN	IGHD_HUMAN	IGHE_HUMAN
biological_process	GO:0006910	phagocytosis, recognition	10	99	0.10101	0.00308703	0.998739	0.986	1	TRBC1_HUMAN	TRBC2_HUMAN	COL12_HUMAN	IGLL1_HUMAN	IGHA1_HUMAN	AGRB1_HUMAN	IGHA2_HUMAN	IGHD_HUMAN	IGHE_HUMAN	CLC7A_HUMAN
biological_process	GO:0045785	positive regulation of cell adhesion	10	50	0.2	0.965004	0.0449903	1	1	ANGP1_HUMAN	ITA2_HUMAN	LDB1_HUMAN	NRG1_HUMAN	STX4_HUMAN	TNR18_HUMAN	ZFHX3_HUMAN	AB1IP_HUMAN	AGRG1_HUMAN	ATM_HUMAN
biological_process	GO:0070498	interleukin-1-mediated signaling pathway	10	69	0.144928	0.341653	0.762909	1	1	IRAK3_HUMAN	EGR1_HUMAN	IKKB_HUMAN	IRAK1_HUMAN	H7C224_HUMAN	G3V5Z7_HUMAN	G3V295_HUMAN	D3YTB5_HUMAN	F5GX11_HUMAN	G3V3I1_HUMAN
biological_process	GO:0043330	response to exogenous dsRNA	10	34	0.294118	0.968584	0.0627734	1	1	RIPK2_HUMAN	4F2_HUMAN	DDX21_HUMAN	IRAK3_HUMAN	DHX36_HUMAN	DDX1_HUMAN	DDX58_HUMAN	NOD2_HUMAN	TLR3_HUMAN	D6RA51_HUMAN
biological_process	GO:0045648	positive regulation of erythrocyte differentiation	10	31	0.322581	0.981855	0.0454944	1	1	HIF1A_HUMAN	ARNT_HUMAN	MED1_HUMAN	KAT7_HUMAN	SHIP1_HUMAN	PRKDC_HUMAN	STA5B_HUMAN	ZNF16_HUMAN	FOXO3_HUMAN	ISG15_HUMAN
biological_process	GO:0016180	snRNA processing	10	37	0.27027	0.980024	0.0374817	1	1	INT11_HUMAN	INT10_HUMAN	INT2_HUMAN	INT5_HUMAN	INT12_HUMAN	INT7_HUMAN	H0YBW3_HUMAN	E5RG70_HUMAN	H0YBH6_HUMAN	J3KMZ7_HUMAN
biological_process	GO:0007140	male meiotic nuclear division	10	27	0.37037	0.982928	0.0353189	1	1	TAF1L_HUMAN	BRDT_HUMAN	FIGL1_HUMAN	SYCP2_HUMAN	MLH3_HUMAN	TEX14_HUMAN	TEX15_HUMAN	ATM_HUMAN	A0A1W2PS94_HUMAN	A0A2R8Y358_HUMAN
biological_process	GO:0001678	cellular glucose homeostasis	10	32	0.3125	0.966238	0.0511592	1	1	HIF1A_HUMAN	FOXK1_HUMAN	P85B_HUMAN	KLF15_HUMAN	P85A_HUMAN	STXB3_HUMAN	TNR16_HUMAN	PRGC1_HUMAN	NR1D1_HUMAN	ABCC8_HUMAN
biological_process	GO:0071479	cellular response to ionizing radiation	10	44	0.227273	0.992144	0.015502	1	1	KDM4D_HUMAN	CLOCK_HUMAN	BRCA1_HUMAN	INO80_HUMAN	BRCA2_HUMAN	FIGL1_HUMAN	P53_HUMAN	TB182_HUMAN	IF16_HUMAN	INT7_HUMAN
biological_process	GO:0060045	positive regulation of cardiac muscle cell proliferation	10	23	0.434783	0.998788	0.00478661	1	1	NOTC1_HUMAN	FOG2_HUMAN	MEF2C_HUMAN	NRG1_HUMAN	SUH_HUMAN	YAP1_HUMAN	TGBR3_HUMAN	WNT2_HUMAN	TBX5_HUMAN	GLI1_HUMAN
biological_process	GO:0007088	regulation of mitotic nuclear division	10	27	0.37037	0.973746	0.0411253	1	1	CDCA2_HUMAN	FBX43_HUMAN	MPIP3_HUMAN	BORA_HUMAN	PIN1_HUMAN	CDK13_HUMAN	KI20B_HUMAN	KI67_HUMAN	ANM5_HUMAN	A0A0A0MSJ5_HUMAN
biological_process	GO:0010735	positive regulation of transcription via serum response element binding	10	22	0.454545	0.999243	0.00323231	1	1	MRTFA_HUMAN	MICA2_HUMAN	SRF_HUMAN	A0A087WU73_HUMAN	B0QY83_HUMAN	A0A087X287_HUMAN	A0A499FIJ6_HUMAN	W0Z7M9_HUMAN	A0A494BZX7_HUMAN	E7ER32_HUMAN
biological_process	GO:0061709	reticulophagy	10	23	0.434783	0.998788	0.00478661	1	1	RETR1_HUMAN	RETR3_HUMAN	STING_HUMAN	UFL1_HUMAN	RBCC1_HUMAN	ATG2A_HUMAN	ATG2B_HUMAN	DDRGK_HUMAN	H0Y9U4_HUMAN	K7EQI9_HUMAN
biological_process	GO:0001895	retina homeostasis	9	42	0.214286	0.987325	0.0238487	1	1	POTEE_HUMAN	POTEF_HUMAN	IGHA1_HUMAN	BBS4_HUMAN	CCD66_HUMAN	POTEI_HUMAN	IGHA2_HUMAN	POTEJ_HUMAN	PROL1_HUMAN
biological_process	GO:0007163	establishment or maintenance of cell polarity	9	54	0.166667	0.997707	0.00367717	1	1	CAP2_HUMAN	FAT1_HUMAN	FTM_HUMAN	MRCKB_HUMAN	RND3_HUMAN	PARD3_HUMAN	CLAP1_HUMAN	CLAP2_HUMAN	CTNA1_HUMAN
biological_process	GO:0030177	positive regulation of Wnt signaling pathway	9	40	0.225	0.691828	0.375948	1	1	SALL1_HUMAN	KANK1_HUMAN	HHEX_HUMAN	MACF1_HUMAN	DIXC1_HUMAN	DACT1_HUMAN	TNAP3_HUMAN	PC11Y_HUMAN	ZRAN1_HUMAN
biological_process	GO:0007569	cell aging	9	24	0.375	0.990481	0.0167436	1	1	BCL2_HUMAN	BRCA2_HUMAN	P53_HUMAN	NUP62_HUMAN	WRN_HUMAN	MORC3_HUMAN	ZMIZ1_HUMAN	P63_HUMAN	DNJA3_HUMAN
biological_process	GO:1900026	positive regulation of substrate adhesion-dependent cell spreading	9	44	0.204545	0.718848	0.420049	1	1	APOA1_HUMAN	CARL1_HUMAN	TARA_HUMAN	DAB2_HUMAN	UN13D_HUMAN	CASS4_HUMAN	MYOC_HUMAN	DOCK1_HUMAN	ABL1_HUMAN
biological_process	GO:0046329	negative regulation of JNK cascade	9	26	0.346154	0.99575	0.0116492	1	1	PER1_HUMAN	NCOR1_HUMAN	DACT1_HUMAN	GPS2_HUMAN	MEN1_HUMAN	ZMY11_HUMAN	TAOK3_HUMAN	ITCH_HUMAN	MECOM_HUMAN
biological_process	GO:0097191	extrinsic apoptotic signaling pathway	9	41	0.219512	0.99676	0.00518972	1	1	HIPK1_HUMAN	K1C18_HUMAN	PML_HUMAN	RIPK1_HUMAN	TNR1B_HUMAN	TGFB2_HUMAN	TLR3_HUMAN	IL6RA_HUMAN	IFNG_HUMAN
biological_process	GO:0006469	negative regulation of protein kinase activity	9	66	0.136364	0.836334	0.211588	1	1	SMCR8_HUMAN	LRP6_HUMAN	CEP85_HUMAN	NF1_HUMAN	WWTR1_HUMAN	PTPRC_HUMAN	TSC2_HUMAN	CEAM1_HUMAN	DNJA3_HUMAN
biological_process	GO:0007076	mitotic chromosome condensation	9	38	0.236842	0.897317	0.186853	1	1	SMC2_HUMAN	TITIN_HUMAN	CNDD3_HUMAN	SMC4_HUMAN	NUSAP_HUMAN	CND1_HUMAN	CNDH2_HUMAN	G3V1A9_HUMAN	E9PKK4_HUMAN
biological_process	GO:0001755	neural crest cell migration	9	48	0.1875	0.552165	0.579447	1	1	SEM4A_HUMAN	SEM4G_HUMAN	HIF1A_HUMAN	LAMA5_HUMAN	SEM4D_HUMAN	SEM3B_HUMAN	SEM6C_HUMAN	RET_HUMAN	ACVR1_HUMAN
biological_process	GO:1902042	negative regulation of extrinsic apoptotic signaling pathway via death domain receptors	9	28	0.321429	0.970892	0.0702995	1	1	HGF_HUMAN	BRCA1_HUMAN	NOS3_HUMAN	RFFL_HUMAN	TNAP3_HUMAN	RAF1_HUMAN	ICAM1_HUMAN	B2CL1_HUMAN	ARHG2_HUMAN
biological_process	GO:0051893	regulation of focal adhesion assembly	9	23	0.391304	0.984126	0.0317227	1	1	PEAK1_HUMAN	SLK_HUMAN	ROCK2_HUMAN	MACF1_HUMAN	GREM1_HUMAN	LIMC1_HUMAN	LDB1_HUMAN	ROCK1_HUMAN	CLAP1_HUMAN
biological_process	GO:0000082	G1/S transition of mitotic cell cycle	9	67	0.134328	0.908115	0.123263	1	1	CDN1B_HUMAN	CTIP_HUMAN	DBF4A_HUMAN	E2F1_HUMAN	CUL2_HUMAN	RHOU_HUMAN	UBP29_HUMAN	Z324A_HUMAN	DPOE1_HUMAN
biological_process	GO:0048469	cell maturation	9	37	0.243243	0.937824	0.0861061	1	1	RUNX2_HUMAN	CCL21_HUMAN	CTNB1_HUMAN	EPAS1_HUMAN	BFSP2_HUMAN	RFX3_HUMAN	UFO_HUMAN	RENI_HUMAN	BTK_HUMAN
biological_process	GO:0070830	bicellular tight junction assembly	9	54	0.166667	0.681376	0.432126	1	1	PECA1_HUMAN	POF1B_HUMAN	GRHL2_HUMAN	APC_HUMAN	SRF_HUMAN	TBCD_HUMAN	PARD3_HUMAN	MILK2_HUMAN	AFAD_HUMAN
biological_process	GO:0090316	positive regulation of intracellular protein transport	9	26	0.346154	0.61076	0.462021	1	1	PCM1_HUMAN	PCNT_HUMAN	CP131_HUMAN	CE290_HUMAN	OAZ2_HUMAN	TEN1_HUMAN	TPR_HUMAN	ICE1_HUMAN	KI20B_HUMAN
biological_process	GO:0032733	positive regulation of interleukin-10 production	9	40	0.225	0.813147	0.307512	1	1	HGF_HUMAN	NOD2_HUMAN	PIBF1_HUMAN	TLR9_HUMAN	TSLP_HUMAN	IL23A_HUMAN	ISG15_HUMAN	CLC7A_HUMAN	CD34_HUMAN
biological_process	GO:0036258	multivesicular body assembly	9	40	0.225	0.813147	0.307512	1	1	HGS_HUMAN	CHM4C_HUMAN	CHMP7_HUMAN	CHMP6_HUMAN	STAM1_HUMAN	VP37A_HUMAN	VPS36_HUMAN	VTA1_HUMAN	CHM2B_HUMAN
biological_process	GO:0048706	embryonic skeletal system development	9	37	0.243243	0.943804	0.0838421	1	1	PBX1_HUMAN	SP3_HUMAN	DLX1_HUMAN	SKT_HUMAN	TAPT1_HUMAN	HXD1_HUMAN	Q5T5P0_HUMAN	Q5T5P1_HUMAN	J3KP65_HUMAN
biological_process	GO:0045740	positive regulation of DNA replication	9	27	0.333333	0.998838	0.00346024	1	1	DNA2_HUMAN	ATAD5_HUMAN	DHX9_HUMAN	KAT7_HUMAN	EGF_HUMAN	FAF1_HUMAN	UCN1_HUMAN	GLI1_HUMAN	GLI2_HUMAN
biological_process	GO:0007041	lysosomal transport	9	23	0.391304	0.992418	0.0131053	1	1	LRP1_HUMAN	MPRI_HUMAN	SPTN5_HUMAN	NEDD4_HUMAN	VPS52_HUMAN	VPS54_HUMAN	AT132_HUMAN	ALS2_HUMAN	A0A7I2V381_HUMAN
biological_process	GO:0050919	negative chemotaxis	9	32	0.28125	0.995457	0.0118553	1	1	PLXA3_HUMAN	SEM4A_HUMAN	SEM4G_HUMAN	APOA1_HUMAN	ITB3_HUMAN	NRP2_HUMAN	SEM4D_HUMAN	SEM3B_HUMAN	SEM6C_HUMAN
biological_process	GO:0048008	platelet-derived growth factor receptor signaling pathway	9	29	0.310345	0.998404	0.00401203	1	1	PKHA1_HUMAN	BCAR1_HUMAN	P3C2A_HUMAN	SGPL1_HUMAN	PARPT_HUMAN	TXNIP_HUMAN	ZFAN5_HUMAN	CSPG4_HUMAN	MYO1E_HUMAN
biological_process	GO:0032147	activation of protein kinase activity	9	33	0.272727	0.963957	0.0583227	1	1	GRDN_HUMAN	INSR_HUMAN	KIF14_HUMAN	ITB3_HUMAN	BORA_HUMAN	CLSPN_HUMAN	TGFB2_HUMAN	TAOK2_HUMAN	ADNP_HUMAN
biological_process	GO:0021983	pituitary gland development	9	30	0.3	0.922532	0.140925	1	1	SALL1_HUMAN	PAX6_HUMAN	CREB1_HUMAN	NEC1_HUMAN	SOX2_HUMAN	SUH_HUMAN	GLI1_HUMAN	GLI2_HUMAN	A0A7I2PJA1_HUMAN
biological_process	GO:0031047	gene silencing by RNA	9	63	0.142857	0.597083	0.479312	1	1	ERI1_HUMAN	DDX17_HUMAN	PABP1_HUMAN	MORC1_HUMAN	TNR6B_HUMAN	TEX15_HUMAN	CNO11_HUMAN	CNOT2_HUMAN	H7C3A1_HUMAN
biological_process	GO:0014070	response to organic cyclic compound	9	43	0.209302	0.923735	0.089245	1	1	PLIN2_HUMAN	DUS6_HUMAN	ANGP2_HUMAN	TAF2_HUMAN	TET2_HUMAN	ATF2_HUMAN	KAT2A_HUMAN	HNF1B_HUMAN	ACACB_HUMAN
biological_process	GO:0045736	negative regulation of cyclin-dependent protein serine/threonine kinase activity	9	24	0.375	0.993129	0.021702	1	1	HEXI2_HUMAN	CDN1B_HUMAN	HHEX_HUMAN	APC_HUMAN	CK5P2_HUMAN	COT2_HUMAN	MEN1_HUMAN	TNAP3_HUMAN	MYCD_HUMAN
biological_process	GO:0007187	G protein-coupled receptor signaling pathway, coupled to cyclic nucleotide second messenger	9	65	0.138462	0.189207	0.889273	1	1	PI2R_HUMAN	HRH1_HUMAN	O10H1_HUMAN	O10J6_HUMAN	O11H7_HUMAN	SSR3_HUMAN	LPAR3_HUMAN	ACM5_HUMAN	5HT1E_HUMAN
biological_process	GO:0060048	cardiac muscle contraction	9	42	0.214286	0.809176	0.25378	1	1	PK3CA_HUMAN	TITIN_HUMAN	KCNQ1_HUMAN	KCNH2_HUMAN	SCN5A_HUMAN	MYH6_HUMAN	MYH7_HUMAN	VEGFB_HUMAN	DMD_HUMAN
biological_process	GO:2000045	regulation of G1/S transition of mitotic cell cycle	9	28	0.321429	0.992354	0.0130012	1	1	SENP2_HUMAN	CDN1B_HUMAN	KIF14_HUMAN	E2F1_HUMAN	INO80_HUMAN	PKD1_HUMAN	TFE2_HUMAN	DP13B_HUMAN	AMRA1_HUMAN
biological_process	GO:0043407	negative regulation of MAP kinase activity	9	44	0.204545	0.833655	0.25886	1	1	DUS7_HUMAN	IRAK3_HUMAN	LAX1_HUMAN	NF1_HUMAN	NUP62_HUMAN	SPY1_HUMAN	SPY2_HUMAN	SPY3_HUMAN	CLM8_HUMAN
biological_process	GO:0090103	cochlea morphogenesis	9	28	0.321429	0.977283	0.0575158	1	1	PAX2_HUMAN	EYA1_HUMAN	ZEB1_HUMAN	PO3F4_HUMAN	MYO3A_HUMAN	MYO3B_HUMAN	F6TDF5_HUMAN	A0A2R8Y739_HUMAN	A0A7I2PJA1_HUMAN
biological_process	GO:0019731	antibacterial humoral response	9	55	0.163636	0.291729	0.810793	1	1	PLPL9_HUMAN	SEMG1_HUMAN	HLAA_HUMAN	IGHA1_HUMAN	IGHA2_HUMAN	SEMG2_HUMAN	WFDC5_HUMAN	A4_HUMAN	BPI_HUMAN
biological_process	GO:0055072	iron ion homeostasis	9	52	0.173077	0.0386682	0.978185	1	1	EPB42_HUMAN	EPAS1_HUMAN	FBXL5_HUMAN	MFRN1_HUMAN	TFR2_HUMAN	TMPS6_HUMAN	PICAL_HUMAN	NEO1_HUMAN	Q59FP8_HUMAN
biological_process	GO:0045880	positive regulation of smoothened signaling pathway	9	36	0.25	0.872555	0.228362	1	1	STK36_HUMAN	DYHC2_HUMAN	INTU_HUMAN	TEDC1_HUMAN	TEDC2_HUMAN	CHSS1_HUMAN	GLI1_HUMAN	EVC_HUMAN	CTNA1_HUMAN
biological_process	GO:0007259	receptor signaling pathway via JAK-STAT	9	39	0.230769	0.535012	0.542943	1	1	CCR2_HUMAN	PKD1_HUMAN	STAT4_HUMAN	STA5B_HUMAN	PKD2_HUMAN	STA5A_HUMAN	PRLR_HUMAN	STAT2_HUMAN	IFNG_HUMAN
biological_process	GO:1902036	regulation of hematopoietic stem cell differentiation	9	53	0.169811	0.493169	0.640987	1	1	SET1A_HUMAN	PRKDC_HUMAN	YTHD2_HUMAN	ITCH_HUMAN	ABL1_HUMAN	G3V5Z7_HUMAN	G3V295_HUMAN	F5GX11_HUMAN	G3V3I1_HUMAN
biological_process	GO:0046034	ATP metabolic process	9	41	0.219512	6.87732e-09	1	0	1	MYH4_HUMAN	ENPP1_HUMAN	ENPP3_HUMAN	FIGL1_HUMAN	MYH3_HUMAN	NADK_HUMAN	MYH6_HUMAN	MYH7_HUMAN	MYH8_HUMAN
biological_process	GO:0008015	blood circulation	9	34	0.264706	0.772307	0.261869	1	1	ACVL1_HUMAN	FA5_HUMAN	CHD7_HUMAN	OLR1_HUMAN	TBCD8_HUMAN	HXB2_HUMAN	IC1_HUMAN	MYOF_HUMAN	GCYB1_HUMAN
biological_process	GO:0061512	protein localization to cilium	9	36	0.25	0.91678	0.134541	1	1	TT21B_HUMAN	FSIP2_HUMAN	BBS4_HUMAN	BROMI_HUMAN	DYHC2_HUMAN	PTHB1_HUMAN	DZI1L_HUMAN	DZIP1_HUMAN	F149B_HUMAN
biological_process	GO:0071985	multivesicular body sorting pathway	9	28	0.321429	0.956348	0.0830733	1	1	SYTL4_HUMAN	RUBIC_HUMAN	CHM4C_HUMAN	EXPH5_HUMAN	CHMP7_HUMAN	CHMP6_HUMAN	VTA1_HUMAN	RB27B_HUMAN	CHM2B_HUMAN
biological_process	GO:0006884	cell volume homeostasis	9	29	0.310345	0.790982	0.335214	1	1	S12A7_HUMAN	S12A1_HUMAN	MITOS_HUMAN	S12A2_HUMAN	S12A8_HUMAN	S12A6_HUMAN	WNK3_HUMAN	CLCN6_HUMAN	A0A0G2JNW7_HUMAN
biological_process	GO:0032206	positive regulation of telomere maintenance	9	12	0.75	0.99399	0.0128579	1	1	MRE11_HUMAN	RTEL1_HUMAN	SLX4_HUMAN	DHX36_HUMAN	PML_HUMAN	SIR6_HUMAN	TERF2_HUMAN	RAD50_HUMAN	NBN_HUMAN
biological_process	GO:0021762	substantia nigra development	9	47	0.191489	0.640868	0.504339	1	1	POTEE_HUMAN	CCD14_HUMAN	SIR2_HUMAN	SIN1_HUMAN	SC16A_HUMAN	ZN148_HUMAN	NDRG2_HUMAN	MBP_HUMAN	AINX_HUMAN
biological_process	GO:0007520	myoblast fusion	9	27	0.333333	0.841807	0.257751	1	1	NPHN_HUMAN	SYCY1_HUMAN	PKHO1_HUMAN	MYH9_HUMAN	TANC1_HUMAN	AGRB3_HUMAN	MYOF_HUMAN	H0YD14_HUMAN	A0A286YFD1_HUMAN
biological_process	GO:1903955	positive regulation of protein targeting to mitochondrion	9	31	0.290323	0.944357	0.118407	1	1	HTRA2_HUMAN	RHOU_HUMAN	SRBP2_HUMAN	UBP36_HUMAN	VPS11_HUMAN	ATG13_HUMAN	HUWE1_HUMAN	MILK2_HUMAN	BAP1_HUMAN
biological_process	GO:0030100	regulation of endocytosis	9	35	0.257143	0.996871	0.00508981	1	1	STON2_HUMAN	HIP1R_HUMAN	CD22_HUMAN	PICAL_HUMAN	TSC2_HUMAN	HIP1_HUMAN	ABL1_HUMAN	ARFG1_HUMAN	A0A3B3IU55_HUMAN
biological_process	GO:0051262	protein tetramerization	9	46	0.195652	0.962455	0.0599779	1	1	P53_HUMAN	STK4_HUMAN	PKD2_HUMAN	TRPM6_HUMAN	P63_HUMAN	HOME1_HUMAN	A4_HUMAN	F5H5B4_HUMAN	A0A0G2JN34_HUMAN
biological_process	GO:0050775	positive regulation of dendrite morphogenesis	9	19	0.473684	0.998324	0.00521809	1	1	PTPRD_HUMAN	CDKL5_HUMAN	CAPR1_HUMAN	CAPR2_HUMAN	PARP6_HUMAN	ANR27_HUMAN	CUX2_HUMAN	CUX1_HUMAN	CREST_HUMAN
biological_process	GO:0007064	mitotic sister chromatid cohesion	9	25	0.36	0.93948	0.118142	1	1	SMC1B_HUMAN	SMC1A_HUMAN	CDC20_HUMAN	NIPBL_HUMAN	SMC3_HUMAN	POGZ_HUMAN	V9GY57_HUMAN	G8JLG1_HUMAN	A0A6Q8PHC3_HUMAN
biological_process	GO:0033077	T cell differentiation in thymus	9	34	0.264706	0.971011	0.0513573	1	1	BCL2_HUMAN	CTNB1_HUMAN	P53_HUMAN	PRKDC_HUMAN	STA5B_HUMAN	TESP1_HUMAN	GLI3_HUMAN	DNJA3_HUMAN	CNDH2_HUMAN
biological_process	GO:0042073	intraciliary transport	9	48	0.1875	0.795673	0.298116	1	1	MAK_HUMAN	DC2I2_HUMAN	LCA5_HUMAN	RPGR_HUMAN	IFT81_HUMAN	IFT88_HUMAN	LCA5L_HUMAN	CILK1_HUMAN	H0YHE2_HUMAN
biological_process	GO:0051123	RNA polymerase II preinitiation complex assembly	9	31	0.290323	0.957388	0.0884796	1	1	TAF6L_HUMAN	TAF6_HUMAN	TAF7L_HUMAN	TAF8_HUMAN	TAF1L_HUMAN	TAF2_HUMAN	TAF4_HUMAN	TAF1_HUMAN	TBP_HUMAN
biological_process	GO:0061024	membrane organization	9	28	0.321429	0.45579	0.576742	1	1	SYNJ1_HUMAN	GRDN_HUMAN	PI51C_HUMAN	P3C2A_HUMAN	TOIP1_HUMAN	TOIP2_HUMAN	OCRL_HUMAN	AAK1_HUMAN	MBP_HUMAN
biological_process	GO:0006418	tRNA aminoacylation for protein translation	9	81	0.111111	4.23188e-05	0.999983	0.06	1	SYNC_HUMAN	SYLM_HUMAN	SYHM_HUMAN	SYMM_HUMAN	A0A3B3ISK7_HUMAN	A0A3B3ITS3_HUMAN	A0A3B3IS01_HUMAN	A0A3B3IT01_HUMAN	A0A3B3IS54_HUMAN
biological_process	GO:0006906	vesicle fusion	9	40	0.225	0.779526	0.298939	1	1	STX17_HUMAN	STX6_HUMAN	STX16_HUMAN	STX1B_HUMAN	STX4_HUMAN	TSNA1_HUMAN	DYSF_HUMAN	EEA1_HUMAN	L7N2F9_HUMAN
biological_process	GO:0035335	peptidyl-tyrosine dephosphorylation	9	27	0.333333	0.976833	0.055643	1	1	TNS2_HUMAN	PTN12_HUMAN	DUS7_HUMAN	DUS6_HUMAN	PTPRT_HUMAN	PTPRZ_HUMAN	PTN13_HUMAN	PTPRO_HUMAN	PTN22_HUMAN
biological_process	GO:0030111	regulation of Wnt signaling pathway	9	21	0.428571	0.889806	0.13521	1	1	SENP2_HUMAN	MDFIC_HUMAN	ITA3_HUMAN	KLF15_HUMAN	TM237_HUMAN	TF7L1_HUMAN	HNF1B_HUMAN	A4_HUMAN	A0A0A0MQU7_HUMAN
biological_process	GO:0045668	negative regulation of osteoblast differentiation	9	47	0.191489	0.640868	0.504339	1	1	LRP5_HUMAN	NOTC1_HUMAN	GREM1_HUMAN	RNB3L_HUMAN	MEN1_HUMAN	SEM4D_HUMAN	PTC1_HUMAN	HXA2_HUMAN	NBR1_HUMAN
biological_process	GO:0007040	lysosome organization	9	57	0.157895	0.326356	0.766119	1	1	LYST_HUMAN	GNPTA_HUMAN	ANAG_HUMAN	LTOR1_HUMAN	ZKSC3_HUMAN	HOOK3_HUMAN	MYO7A_HUMAN	A0A0A0MRZ6_HUMAN	F5GX19_HUMAN
biological_process	GO:0032735	positive regulation of interleukin-12 production	9	43	0.209302	0.743714	0.391638	1	1	RIPK2_HUMAN	IRF8_HUMAN	NOD2_HUMAN	TLR9_HUMAN	TLR3_HUMAN	IL16_HUMAN	IL23A_HUMAN	IFNG_HUMAN	CLC7A_HUMAN
biological_process	GO:0002218	activation of innate immune response	9	44	0.204545	0.254087	0.819178	1	1	MATR3_HUMAN	MNDA_HUMAN	SIN3A_HUMAN	PRKDC_HUMAN	STING_HUMAN	RBM14_HUMAN	IF16_HUMAN	A0A494C0W5_HUMAN	A0A494C1N5_HUMAN
biological_process	GO:0045945	positive regulation of transcription by RNA polymerase III	9	19	0.473684	0.99921	0.00367871	1	1	BAZ1B_HUMAN	DDX21_HUMAN	ERCC6_HUMAN	ELL_HUMAN	MBB1A_HUMAN	CHD8_HUMAN	ZN143_HUMAN	ZC3H8_HUMAN	ICE1_HUMAN
biological_process	GO:0042531	positive regulation of tyrosine phosphorylation of STAT protein	9	65	0.138462	0.2207	0.86738	1	1	HCLS1_HUMAN	PIBF1_HUMAN	PARP9_HUMAN	TNR18_HUMAN	TSLP_HUMAN	IL23A_HUMAN	IL6RA_HUMAN	IL6RB_HUMAN	IFNG_HUMAN
biological_process	GO:0045954	positive regulation of natural killer cell mediated cytotoxicity	9	26	0.346154	0.977283	0.0575158	1	1	LAG3_HUMAN	KLRD1_HUMAN	GRP1_HUMAN	SLAF6_HUMAN	STA5B_HUMAN	VAV_HUMAN	PVR_HUMAN	BY55_HUMAN	AP1G1_HUMAN
biological_process	GO:0032703	negative regulation of interleukin-2 production	9	29	0.310345	0.970892	0.0702995	1	1	LAG3_HUMAN	NOD2_HUMAN	TBX21_HUMAN	PTPRC_HUMAN	TNAP3_HUMAN	HOME2_HUMAN	HOME3_HUMAN	NAV3_HUMAN	CD34_HUMAN
biological_process	GO:0008156	negative regulation of DNA replication	9	22	0.409091	0.981461	0.0426125	1	1	GTPB4_HUMAN	ATR_HUMAN	P53_HUMAN	TERF1_HUMAN	WAPL_HUMAN	TTF1_HUMAN	RAD17_HUMAN	CDC6_HUMAN	CDAN1_HUMAN
biological_process	GO:0045948	positive regulation of translational initiation	9	22	0.409091	0.997999	0.00640192	1	1	LARP1_HUMAN	DAZ1_HUMAN	DAZ2_HUMAN	HABP4_HUMAN	DAZL_HUMAN	CD123_HUMAN	YTHD3_HUMAN	DAZ4_HUMAN	DAZ3_HUMAN
biological_process	GO:0019226	transmission of nerve impulse	9	27	0.333333	0.850385	0.222175	1	1	NFASC_HUMAN	CNTP2_HUMAN	SPTN4_HUMAN	OTOAN_HUMAN	ACM5_HUMAN	D6RBU5_HUMAN	X6RKN2_HUMAN	H7BY57_HUMAN	A0A7P0Z4R6_HUMAN
biological_process	GO:0048704	embryonic skeletal system morphogenesis	9	43	0.209302	0.888134	0.166493	1	1	EYA1_HUMAN	MEGF8_HUMAN	SATB2_HUMAN	ZEB1_HUMAN	HXB2_HUMAN	HXC4_HUMAN	HXD10_HUMAN	DSCL1_HUMAN	F6TDF5_HUMAN
biological_process	GO:0007043	cell-cell junction assembly	9	42	0.214286	0.986832	0.0209641	1	1	TLN1_HUMAN	TLN2_HUMAN	CADH7_HUMAN	HEG1_HUMAN	PKP2_HUMAN	PKP4_HUMAN	ZO1_HUMAN	CTND2_HUMAN	AMOT_HUMAN
biological_process	GO:0035249	synaptic transmission, glutamatergic	9	33	0.272727	0.764124	0.318715	1	1	EXT1_HUMAN	GRID2_HUMAN	UN13A_HUMAN	UN13B_HUMAN	UN13C_HUMAN	ALS2_HUMAN	F8W0P6_HUMAN	F8VZH8_HUMAN	F8W059_HUMAN
biological_process	GO:0034314	Arp2/3 complex-mediated actin nucleation	9	45	0.2	0.778007	0.31574	1	1	MAGL2_HUMAN	ARC1B_HUMAN	WASH4_HUMAN	JMY_HUMAN	ARC1A_HUMAN	A0A7I2YQU6_HUMAN	E9PF58_HUMAN	A0A1W2PNV4_HUMAN	A0A0A6YYG9_HUMAN
biological_process	GO:0006306	DNA methylation	9	26	0.346154	0.985409	0.0283614	1	1	KMT2E_HUMAN	HELLS_HUMAN	BAZ2A_HUMAN	P66A_HUMAN	HEMK1_HUMAN	MCAF1_HUMAN	MTRR_HUMAN	TEX15_HUMAN	EHMT2_HUMAN
biological_process	GO:0042446	hormone biosynthetic process	9	29	0.310345	0.527558	0.581588	1	1	PERT_HUMAN	THYG_HUMAN	DUOX2_HUMAN	A0A0G2JR31_HUMAN	A0A0G2JR90_HUMAN	A0A0G2JP53_HUMAN	A0A0G2JRZ1_HUMAN	H7C1F5_HUMAN	X6RAN8_HUMAN
biological_process	GO:0032727	positive regulation of interferon-alpha production	9	23	0.391304	0.995213	0.0161405	1	1	RIPK2_HUMAN	DHX9_HUMAN	DHX36_HUMAN	DDX58_HUMAN	SETD2_HUMAN	TLR9_HUMAN	TLR3_HUMAN	ZCCHV_HUMAN	A0A0B4J1S7_HUMAN
biological_process	GO:0046579	positive regulation of Ras protein signal transduction	9	22	0.409091	0.991016	0.0187836	1	1	LRRD1_HUMAN	ERBIN_HUMAN	NOTC1_HUMAN	GRP1_HUMAN	IP3KB_HUMAN	NRG1_HUMAN	RGRF1_HUMAN	RGF1A_HUMAN	A0A087WV00_HUMAN
biological_process	GO:0008589	regulation of smoothened signaling pathway	9	20	0.45	0.985274	0.0272885	1	1	TT21B_HUMAN	C2CD3_HUMAN	FTM_HUMAN	INTU_HUMAN	OTX2_HUMAN	PTC1_HUMAN	IFT81_HUMAN	GLI1_HUMAN	CBP_HUMAN
biological_process	GO:0022011	myelination in peripheral nervous system	9	19	0.473684	0.841807	0.257751	1	1	LGI4_HUMAN	CNTP1_HUMAN	NF1_HUMAN	SIR2_HUMAN	NRG1_HUMAN	NTRK2_HUMAN	PARD3_HUMAN	MYOC_HUMAN	H7C3I4_HUMAN
biological_process	GO:0031643	positive regulation of myelination	9	18	0.5	0.999552	0.00231014	1	1	HGF_HUMAN	ITAX_HUMAN	EGR2_HUMAN	TNR1B_HUMAN	TEN4_HUMAN	WASF3_HUMAN	PARD3_HUMAN	ZN488_HUMAN	MYRF_HUMAN
biological_process	GO:0002223	stimulatory C-type lectin receptor signaling pathway	9	64	0.140625	0.23779	0.855184	1	1	KLRD1_HUMAN	EP300_HUMAN	IKKB_HUMAN	CLC7A_HUMAN	CBP_HUMAN	G3V5Z7_HUMAN	G3V295_HUMAN	F5GX11_HUMAN	G3V3I1_HUMAN
biological_process	GO:0051209	release of sequestered calcium ion into cytosol	9	33	0.272727	0.569342	0.524601	1	1	ITPR3_HUMAN	ITPR1_HUMAN	ITPR2_HUMAN	CCL21_HUMAN	RYR3_HUMAN	PKD2_HUMAN	PTPRC_HUMAN	TRPM2_HUMAN	IBTK_HUMAN
biological_process	GO:0045664	regulation of neuron differentiation	9	31	0.290323	0.962858	0.0535086	1	1	ALK_HUMAN	CK5P2_HUMAN	BIN1_HUMAN	EYA1_HUMAN	CDON_HUMAN	LTK_HUMAN	WDR62_HUMAN	ROCK1_HUMAN	ZFHX3_HUMAN
biological_process	GO:0007422	peripheral nervous system development	9	36	0.25	0.982199	0.0302354	1	1	NFASC_HUMAN	AGRB1_HUMAN	EGR2_HUMAN	NF1_HUMAN	NEUS_HUMAN	D6RBU5_HUMAN	X6RKN2_HUMAN	H7BY57_HUMAN	A0A7P0Z4R6_HUMAN
biological_process	GO:0031145	anaphase-promoting complex-dependent catabolic process	9	74	0.121622	0.087962	0.95405	1	1	APC5_HUMAN	CDC27_HUMAN	CDC20_HUMAN	FZR1_HUMAN	APC1_HUMAN	G3V5Z7_HUMAN	G3V295_HUMAN	F5GX11_HUMAN	G3V3I1_HUMAN
biological_process	GO:0008625	extrinsic apoptotic signaling pathway via death domain receptors	9	34	0.264706	0.995613	0.00886533	1	1	DDX47_HUMAN	DAXX_HUMAN	BCL2_HUMAN	C8AP2_HUMAN	P85A_HUMAN	NF1_HUMAN	TR10B_HUMAN	BAG3_HUMAN	A0A087WTW5_HUMAN
biological_process	GO:0060339	negative regulation of type I interferon-mediated signaling pathway	9	19	0.473684	0.99921	0.00367871	1	1	DSRAD_HUMAN	CATIN_HUMAN	OAS3_HUMAN	STAT2_HUMAN	NLRC5_HUMAN	TREX1_HUMAN	YTHD2_HUMAN	YTHD3_HUMAN	ISG15_HUMAN
biological_process	GO:0016973	poly(A)+ mRNA export from nucleus	9	22	0.409091	0.996768	0.0116977	1	1	HHEX_HUMAN	NXF3_HUMAN	GANP_HUMAN	NUP93_HUMAN	NXF2_HUMAN	ZC11A_HUMAN	NU133_HUMAN	CL050_HUMAN	GLE1_HUMAN
biological_process	GO:0019885	antigen processing and presentation of endogenous peptide antigen via MHC class I	9	24	0.375	0.998376	0.00569471	1	1	HLAA_HUMAN	ERAP1_HUMAN	TAP2_HUMAN	TAP1_HUMAN	A0A140T9S0_HUMAN	A0A0G2JLV0_HUMAN	A0A087WYD6_HUMAN	E7ENX8_HUMAN	X5CMH5_HUMAN
biological_process	GO:0003094	glomerular filtration	9	17	0.529412	0.994305	0.0174057	1	1	IGHA1_HUMAN	KIRR1_HUMAN	IGHA2_HUMAN	MUC18_HUMAN	TBC8B_HUMAN	RHPN2_HUMAN	MYO1E_HUMAN	AGRF5_HUMAN	CD34_HUMAN
biological_process	GO:0030050	vesicle transport along actin filament	9	19	0.473684	0.99921	0.00367871	1	1	FBP1L_HUMAN	MYO1E_HUMAN	MYO5A_HUMAN	MYO5B_HUMAN	MYO5C_HUMAN	MYO6_HUMAN	MYO7A_HUMAN	MYO15_HUMAN	MYO19_HUMAN
biological_process	GO:0010971	positive regulation of G2/M transition of mitotic cell cycle	8	28	0.285714	0.942484	0.127119	1	1	BRD4_HUMAN	PBX1_HUMAN	MPIP3_HUMAN	SIN3A_HUMAN	STOX1_HUMAN	DTL_HUMAN	A4_HUMAN	DBF4B_HUMAN
biological_process	GO:0032968	positive regulation of transcription elongation from RNA polymerase II promoter	8	22	0.363636	0.988302	0.0358916	1	1	BRD4_HUMAN	SPT6H_HUMAN	CTNB1_HUMAN	ELL_HUMAN	CDK12_HUMAN	CDK13_HUMAN	CCNK_HUMAN	CCNT1_HUMAN
biological_process	GO:0071108	protein K48-linked deubiquitination	8	27	0.296296	0.970892	0.0702995	1	1	MINY2_HUMAN	OTUD4_HUMAN	UBP34_HUMAN	UBP29_HUMAN	TNAP3_HUMAN	UBP33_HUMAN	U17L2_HUMAN	BAP1_HUMAN
biological_process	GO:0001569	branching involved in blood vessel morphogenesis	8	29	0.275862	0.98876	0.0291308	1	1	PLXD1_HUMAN	EGLN_HUMAN	CTNB1_HUMAN	STK4_HUMAN	SRF_HUMAN	RBM15_HUMAN	NRARP_HUMAN	ACVR1_HUMAN
biological_process	GO:0071345	cellular response to cytokine stimulus	8	34	0.235294	0.994626	0.00674742	1	1	HCLS1_HUMAN	NFAT5_HUMAN	FUBP2_HUMAN	HAX1_HUMAN	AKAP6_HUMAN	CRNN_HUMAN	CSF3_HUMAN	ASAH2_HUMAN
biological_process	GO:0002040	sprouting angiogenesis	8	32	0.25	0.925012	0.110824	1	1	ANGP1_HUMAN	NOTC1_HUMAN	E2F7_HUMAN	RN213_HUMAN	OTUL_HUMAN	VEGFB_HUMAN	RECK_HUMAN	E2F8_HUMAN
biological_process	GO:0019722	calcium-mediated signaling	8	81	0.0987654	0.214028	0.83498	1	1	CCR2_HUMAN	CCR9_HUMAN	NEB1_HUMAN	PA24B_HUMAN	SAM14_HUMAN	KKCC2_HUMAN	BTK_HUMAN	A4_HUMAN
biological_process	GO:0006493	protein O-linked glycosylation	8	48	0.166667	0.108343	0.935578	1	1	GALT9_HUMAN	GALT6_HUMAN	TET1_HUMAN	POMT1_HUMAN	VEGFB_HUMAN	TET2_HUMAN	TET3_HUMAN	J3KNN1_HUMAN
biological_process	GO:0043536	positive regulation of blood vessel endothelial cell migration	8	38	0.210526	0.941078	0.107122	1	1	NF2L2_HUMAN	HIF1A_HUMAN	ANGP1_HUMAN	ANGP4_HUMAN	NOS3_HUMAN	SP1_HUMAN	STA5A_HUMAN	AMOT_HUMAN
biological_process	GO:0048535	lymph node development	8	20	0.4	0.994391	0.0199093	1	1	CD248_HUMAN	TOX_HUMAN	TNR11_HUMAN	NKX23_HUMAN	TNFB_HUMAN	RC3H1_HUMAN	RC3H2_HUMAN	CIKS_HUMAN
biological_process	GO:0060348	bone development	8	57	0.140351	0.618887	0.44664	1	1	PE2R4_HUMAN	MCPH1_HUMAN	EGLN_HUMAN	S38AA_HUMAN	MYOC_HUMAN	BBX_HUMAN	AKP13_HUMAN	AMER1_HUMAN
biological_process	GO:0048863	stem cell differentiation	8	37	0.216216	0.985156	0.0214686	1	1	PAX2_HUMAN	RUNX2_HUMAN	JARD2_HUMAN	FOXO4_HUMAN	SETD2_HUMAN	PUM1_HUMAN	ZN281_HUMAN	A2MG_HUMAN
biological_process	GO:0008277	regulation of G protein-coupled receptor signaling pathway	8	52	0.153846	0.315306	0.758351	1	1	DGKQ_HUMAN	GRK6_HUMAN	RIC8B_HUMAN	RGS12_HUMAN	UBP33_HUMAN	RGS6_HUMAN	FRPD1_HUMAN	HOME2_HUMAN
biological_process	GO:0032570	response to progesterone	8	33	0.242424	0.834189	0.280364	1	1	PE2R2_HUMAN	FOSB_HUMAN	NCOA2_HUMAN	SRBP1_HUMAN	TXNIP_HUMAN	TGFB2_HUMAN	YAP1_HUMAN	MBP_HUMAN
biological_process	GO:0019752	carboxylic acid metabolic process	8	54	0.148148	7.31172e-23	1	0	1	UEVLD_HUMAN	H3BQ59_HUMAN	J3KPG9_HUMAN	C9JTU8_HUMAN	H3BTP4_HUMAN	E9PFW9_HUMAN	Q9Y602_HUMAN	D6RDU9_HUMAN
biological_process	GO:0042113	B cell activation	8	40	0.2	0.721002	0.325603	1	1	HDAC9_HUMAN	MALT1_HUMAN	CD22_HUMAN	LAX1_HUMAN	GRP1_HUMAN	FCRL1_HUMAN	IGBP1_HUMAN	BTK_HUMAN
biological_process	GO:0045471	response to ethanol	8	102	0.0784314	0.00619604	0.997249	1	1	GABT_HUMAN	NMD3A_HUMAN	SRBP1_HUMAN	NTRK3_HUMAN	ABCBB_HUMAN	CSF3_HUMAN	EHMT2_HUMAN	A0A087X0K9_HUMAN
biological_process	GO:0006977	DNA damage response, signal transduction by p53 class mediator resulting in cell cycle arrest	8	20	0.4	0.994391	0.0199093	1	1	CDN1B_HUMAN	MUC1_HUMAN	PML_HUMAN	GTSE1_HUMAN	P53_HUMAN	CHK2_HUMAN	MDM2_HUMAN	ATM_HUMAN
biological_process	GO:0032689	negative regulation of interferon-gamma production	8	41	0.195122	0.664786	0.488127	1	1	LEG9B_HUMAN	NOD2_HUMAN	PGRP2_HUMAN	UFO_HUMAN	ZN683_HUMAN	ZC12A_HUMAN	LIRB1_HUMAN	LEG9C_HUMAN
biological_process	GO:0046627	negative regulation of insulin receptor signaling pathway	8	35	0.228571	0.819573	0.307745	1	1	TNS2_HUMAN	GRB14_HUMAN	KANK1_HUMAN	GRB10_HUMAN	ENPP1_HUMAN	NCOA5_HUMAN	TSC2_HUMAN	A0A2R8YCL1_HUMAN
biological_process	GO:0035418	protein localization to synapse	8	15	0.533333	0.996768	0.00707243	1	1	PCLO_HUMAN	SHAN1_HUMAN	NPHN_HUMAN	RELN_HUMAN	BSN_HUMAN	DLG4_HUMAN	HOME1_HUMAN	BAIP2_HUMAN
biological_process	GO:0050900	leukocyte migration	8	26	0.307692	0.252527	0.787019	1	1	PDE4B_HUMAN	SELPL_HUMAN	ROCK1_HUMAN	NKX23_HUMAN	MYH9_HUMAN	ADDB_HUMAN	ICAM1_HUMAN	CD34_HUMAN
biological_process	GO:0097421	liver regeneration	8	31	0.258065	0.899245	0.196858	1	1	AURKA_HUMAN	PNPT1_HUMAN	PTN3_HUMAN	ZPI_HUMAN	PTC1_HUMAN	GLI1_HUMAN	GLI3_HUMAN	ANM5_HUMAN
biological_process	GO:0097190	apoptotic signaling pathway	8	67	0.119403	0.780483	0.25075	1	1	SENP1_HUMAN	C8AP2_HUMAN	ITAM_HUMAN	SGPL1_HUMAN	DIDO1_HUMAN	HIP1_HUMAN	BTK_HUMAN	A0A096LP21_HUMAN
biological_process	GO:0034605	cellular response to heat	8	52	0.153846	0.778445	0.318624	1	1	DAXX_HUMAN	HTRA2_HUMAN	DHX36_HUMAN	HIKES_HUMAN	NF1_HUMAN	TPR_HUMAN	BAG3_HUMAN	IRAK1_HUMAN
biological_process	GO:0042157	lipoprotein metabolic process	8	52	0.153846	1.63687e-07	1	0	1	APOA1_HUMAN	APOA2_HUMAN	OLR1_HUMAN	A4_HUMAN	APOA4_HUMAN	H7BYQ5_HUMAN	V9GYS1_HUMAN	V9GYM3_HUMAN
biological_process	GO:0048286	lung alveolus development	8	39	0.205128	0.875277	0.212933	1	1	PRGR_HUMAN	RC3H2_HUMAN	ACE_HUMAN	ATX1L_HUMAN	ABCAC_HUMAN	MYCD_HUMAN	MA2A1_HUMAN	A0A0U1RRH6_HUMAN
biological_process	GO:0001892	embryonic placenta development	8	19	0.421053	0.992761	0.0139749	1	1	SP3_HUMAN	HIF1A_HUMAN	ARNT_HUMAN	BPTF_HUMAN	EPAS1_HUMAN	MED1_HUMAN	PKD1_HUMAN	PKD2_HUMAN
biological_process	GO:0035329	hippo signaling	8	30	0.266667	0.978809	0.0436525	1	1	PJA2_HUMAN	AMOL1_HUMAN	STK4_HUMAN	WWTR1_HUMAN	YAP1_HUMAN	AMOL2_HUMAN	AMOT_HUMAN	K7EPI8_HUMAN
biological_process	GO:2000378	negative regulation of reactive oxygen species metabolic process	8	21	0.380952	0.767799	0.363309	1	1	PAX2_HUMAN	HIF1A_HUMAN	BCL2_HUMAN	BRCA1_HUMAN	BNIP3_HUMAN	BCR_HUMAN	P53_HUMAN	SIR2_HUMAN
biological_process	GO:1900182	positive regulation of protein localization to nucleus	8	34	0.235294	0.986025	0.0256818	1	1	KAT7_HUMAN	LIMK2_HUMAN	TNR16_HUMAN	PARP9_HUMAN	WWTR1_HUMAN	TRIM8_HUMAN	YAP1_HUMAN	DTX3L_HUMAN
biological_process	GO:1901673	regulation of mitotic spindle assembly	8	24	0.333333	0.978298	0.0587872	1	1	KIF15_HUMAN	CHM4C_HUMAN	CHMP7_HUMAN	CHMP6_HUMAN	TPR_HUMAN	CEP97_HUMAN	CHM2B_HUMAN	D6RCT7_HUMAN
biological_process	GO:0060291	long-term synaptic potentiation	8	48	0.166667	0.633064	0.472442	1	1	LRRT2_HUMAN	ITPR3_HUMAN	RGRF2_HUMAN	NCKX1_HUMAN	TENR_HUMAN	STX4_HUMAN	RELN_HUMAN	NTRK2_HUMAN
biological_process	GO:0045022	early endosome to late endosome transport	8	26	0.307692	0.83733	0.258556	1	1	PK3C3_HUMAN	LMTK2_HUMAN	WDR91_HUMAN	BAKOR_HUMAN	ANR27_HUMAN	HOOK3_HUMAN	EEA1_HUMAN	C9J1X0_HUMAN
biological_process	GO:0034497	protein localization to phagophore assembly site	8	18	0.444444	0.99769	0.00976365	1	1	PK3C3_HUMAN	STX17_HUMAN	LRBA_HUMAN	TPPC8_HUMAN	WIPI4_HUMAN	ATG13_HUMAN	ATG9B_HUMAN	ARFP2_HUMAN
biological_process	GO:0001709	cell fate determination	8	18	0.444444	0.951433	0.0956465	1	1	PAX2_HUMAN	PAX6_HUMAN	PTC2_HUMAN	PTC1_HUMAN	HXA2_HUMAN	BARH2_HUMAN	COE2_HUMAN	DSCL1_HUMAN
biological_process	GO:0044208	'de novo' AMP biosynthetic process	8	16	0.5	0.999225	0.0040641	1	1	PUR6_HUMAN	PUR8_HUMAN	A0A096LNY6_HUMAN	A0A0A6YY92_HUMAN	A0A1B0GTJ7_HUMAN	A0A1B0GWJ0_HUMAN	A0A7P0Z472_HUMAN	A0A7P0T8E4_HUMAN
biological_process	GO:0035307	positive regulation of protein dephosphorylation	8	35	0.228571	0.974685	0.050891	1	1	LIRB2_HUMAN	CDCA2_HUMAN	PIN1_HUMAN	2A5A_HUMAN	2A5D_HUMAN	AMRA1_HUMAN	CMTA1_HUMAN	E9PEI0_HUMAN
biological_process	GO:0035115	embryonic forelimb morphogenesis	8	31	0.258065	0.899245	0.196858	1	1	RUNX2_HUMAN	FTM_HUMAN	CAC1C_HUMAN	CTNB1_HUMAN	NIPBL_HUMAN	P63_HUMAN	RECK_HUMAN	TBX5_HUMAN
biological_process	GO:0048814	regulation of dendrite morphogenesis	8	23	0.347826	0.997878	0.00493722	1	1	SI1L1_HUMAN	TNIK_HUMAN	HECW2_HUMAN	SEM4D_HUMAN	NEDD4_HUMAN	AGRB3_HUMAN	HECW1_HUMAN	LZTS1_HUMAN
biological_process	GO:1901216	positive regulation of neuron death	8	37	0.216216	0.793251	0.289399	1	1	DDIT4_HUMAN	DAXX_HUMAN	EGR1_HUMAN	ITAM_HUMAN	ZN746_HUMAN	PICAL_HUMAN	IFNG_HUMAN	A4_HUMAN
biological_process	GO:0045010	actin nucleation	8	39	0.205128	0.693684	0.391083	1	1	LMOD2_HUMAN	FMN1_HUMAN	EVL_HUMAN	SCIN_HUMAN	H0YM30_HUMAN	H0YJN0_HUMAN	A0A5F9ZHS8_HUMAN	G3V314_HUMAN
biological_process	GO:0018279	protein N-linked glycosylation via asparagine	8	25	0.32	0.971487	0.0730342	1	1	RPN2_HUMAN	RPN1_HUMAN	UGGG2_HUMAN	OST48_HUMAN	UB2J1_HUMAN	UGGG1_HUMAN	FUT8_HUMAN	A0A0C4DGS1_HUMAN
biological_process	GO:0003351	epithelial cilium movement involved in extracellular fluid movement	8	19	0.421053	0.998416	0.0045429	1	1	STK36_HUMAN	DYH1_HUMAN	KIF27_HUMAN	DNAI1_HUMAN	SPG17_HUMAN	ROP1L_HUMAN	DYH5_HUMAN	CCD40_HUMAN
biological_process	GO:0061436	establishment of skin barrier	8	27	0.296296	0.953669	0.107233	1	1	KDF1_HUMAN	K1C16_HUMAN	FILA2_HUMAN	FILA_HUMAN	P63_HUMAN	ABCAC_HUMAN	HORN_HUMAN	A0A1B0GW56_HUMAN
biological_process	GO:1904646	cellular response to amyloid-beta	8	40	0.2	0.692488	0.45829	1	1	LRP1_HUMAN	CAC1A_HUMAN	SNX6_HUMAN	TNR16_HUMAN	FOXO3_HUMAN	ICAM1_HUMAN	A4_HUMAN	CA2D1_HUMAN
biological_process	GO:0034113	heterotypic cell-cell adhesion	8	25	0.32	0.922534	0.134923	1	1	ITAX_HUMAN	LIRB2_HUMAN	ITAD_HUMAN	ITB3_HUMAN	RNS10_HUMAN	MADCA_HUMAN	PTPRC_HUMAN	CD2_HUMAN
biological_process	GO:0007584	response to nutrient	8	57	0.140351	0.133379	0.908899	1	1	NOD2_HUMAN	ODBB_HUMAN	PUR8_HUMAN	TR11B_HUMAN	TNFB_HUMAN	A2MG_HUMAN	LIPE_HUMAN	CY24B_HUMAN
biological_process	GO:0055075	potassium ion homeostasis	8	20	0.4	0.862379	0.250333	1	1	S12A7_HUMAN	S12A1_HUMAN	KCNQ1_HUMAN	KCNH2_HUMAN	S12A2_HUMAN	S12A8_HUMAN	S12A6_HUMAN	AP2B_HUMAN
biological_process	GO:0006879	cellular iron ion homeostasis	8	78	0.102564	0.0196044	0.991357	1	1	VATG1_HUMAN	HIF1A_HUMAN	FRRS1_HUMAN	TFR2_HUMAN	TMPS6_HUMAN	AT132_HUMAN	ABCB6_HUMAN	E9PK45_HUMAN
biological_process	GO:0007595	lactation	8	40	0.2	0.743714	0.391638	1	1	HIF1A_HUMAN	NCOR2_HUMAN	MED1_HUMAN	CREB1_HUMAN	STA5B_HUMAN	STA5A_HUMAN	PRLR_HUMAN	XDH_HUMAN
biological_process	GO:0007131	reciprocal meiotic recombination	8	47	0.170213	0.886533	0.175542	1	1	MRE11_HUMAN	SHOC1_HUMAN	MLH3_HUMAN	RAD50_HUMAN	RAD54_HUMAN	R212B_HUMAN	RA54B_HUMAN	ATM_HUMAN
biological_process	GO:0048854	brain morphogenesis	8	33	0.242424	0.910878	0.158193	1	1	PAX2_HUMAN	FANCC_HUMAN	FACD2_HUMAN	BBS4_HUMAN	CTNA2_HUMAN	MKKS_HUMAN	ZN335_HUMAN	FOXO3_HUMAN
biological_process	GO:0043154	negative regulation of cysteine-type endopeptidase activity involved in apoptotic process	8	56	0.142857	0.17478	0.899044	1	1	PAX2_HUMAN	HGF_HUMAN	LAMP3_HUMAN	BIRC1_HUMAN	SH3R1_HUMAN	RAF1_HUMAN	IGBP1_HUMAN	DNJA3_HUMAN
biological_process	GO:0042311	vasodilation	8	36	0.222222	0.441516	0.700708	1	1	PLPL9_HUMAN	ITA1_HUMAN	KNG1_HUMAN	EXT1_HUMAN	NOS3_HUMAN	MKKS_HUMAN	UCN1_HUMAN	CPSM_HUMAN
biological_process	GO:0006895	Golgi to endosome transport	8	19	0.421053	0.988302	0.0358916	1	1	GBF1_HUMAN	EPS15_HUMAN	VP13C_HUMAN	VP13A_HUMAN	CORO7_HUMAN	DOP1_HUMAN	AP4M1_HUMAN	Q5TA12_HUMAN
biological_process	GO:0048873	homeostasis of number of cells within a tissue	8	27	0.296296	0.9297	0.148765	1	1	LICH_HUMAN	FUMH_HUMAN	BCL2_HUMAN	NOTC1_HUMAN	CCR2_HUMAN	GGYF2_HUMAN	NOS3_HUMAN	VPS54_HUMAN
biological_process	GO:2000134	negative regulation of G1/S transition of mitotic cell cycle	8	41	0.195122	0.991841	0.0163009	1	1	APC_HUMAN	BCL2_HUMAN	DACT1_HUMAN	E2F7_HUMAN	KANK2_HUMAN	PKD2_HUMAN	MYO16_HUMAN	ACVR1_HUMAN
biological_process	GO:0035914	skeletal muscle cell differentiation	8	43	0.186047	0.957585	0.0763086	1	1	NOTC1_HUMAN	EGR1_HUMAN	EOMES_HUMAN	EGR2_HUMAN	ZEP3_HUMAN	MEF2D_HUMAN	BCL9_HUMAN	ASB2_HUMAN
biological_process	GO:0032212	positive regulation of telomere maintenance via telomerase	8	38	0.210526	0.746071	0.397823	1	1	MAPK5_HUMAN	CTNB1_HUMAN	HMBX1_HUMAN	ATR_HUMAN	PNKP_HUMAN	TCPH_HUMAN	NAF1_HUMAN	ATM_HUMAN
biological_process	GO:0006607	NLS-bearing protein import into nucleus	8	19	0.421053	0.996321	0.0141891	1	1	RGPD3_HUMAN	RGPD2_HUMAN	RGPD5_HUMAN	RGPD8_HUMAN	RGPD1_HUMAN	RGPD4_HUMAN	NUP54_HUMAN	RBP2_HUMAN
biological_process	GO:0006836	neurotransmitter transport	8	60	0.133333	0.180664	0.858784	1	1	SYNJ1_HUMAN	S6A15_HUMAN	ICA69_HUMAN	B7Z3C5_HUMAN	A0A2R8YDD5_HUMAN	A0A2R8Y4I3_HUMAN	A0A2R8YF74_HUMAN	A0A2R8Y867_HUMAN
biological_process	GO:0016082	synaptic vesicle priming	8	17	0.470588	0.996768	0.0116977	1	1	SYNJ1_HUMAN	ERC2_HUMAN	UN13A_HUMAN	UN13B_HUMAN	UN13C_HUMAN	F8W0P6_HUMAN	F8VZH8_HUMAN	F8W059_HUMAN
biological_process	GO:0001778	plasma membrane repair	8	24	0.333333	0.978298	0.0587872	1	1	SYTL4_HUMAN	CHM4C_HUMAN	CHMP7_HUMAN	CHMP6_HUMAN	MYH9_HUMAN	MYOF_HUMAN	CHM2B_HUMAN	DYSF_HUMAN
biological_process	GO:0016188	synaptic vesicle maturation	8	14	0.571429	0.999595	0.00241953	1	1	UN13A_HUMAN	UN13B_HUMAN	UN13C_HUMAN	PICAL_HUMAN	DLG4_HUMAN	F8W0P6_HUMAN	F8VZH8_HUMAN	F8W059_HUMAN
biological_process	GO:0007031	peroxisome organization	8	30	0.266667	0.456858	0.668213	1	1	PEX2_HUMAN	PEX14_HUMAN	PEX6_HUMAN	PEX19_HUMAN	SC16B_HUMAN	PEX1_HUMAN	Q5QNY5_HUMAN	H0YJ60_HUMAN
biological_process	GO:0001656	metanephros development	8	29	0.275862	0.997093	0.00591111	1	1	ROBO2_HUMAN	GRB1L_HUMAN	BCL2_HUMAN	EYA1_HUMAN	NIPBL_HUMAN	NF1_HUMAN	SPY1_HUMAN	GLI3_HUMAN
biological_process	GO:0030178	negative regulation of Wnt signaling pathway	8	62	0.129032	0.502375	0.563165	1	1	LRP1_HUMAN	GRB10_HUMAN	DACT1_HUMAN	NLK_HUMAN	NKD2_HUMAN	NFAC1_HUMAN	TSC2_HUMAN	A4_HUMAN
biological_process	GO:0060395	SMAD protein signal transduction	8	63	0.126984	0.368171	0.733623	1	1	NUP93_HUMAN	TGFB2_HUMAN	ZMIZ1_HUMAN	RBM14_HUMAN	ACATN_HUMAN	HIPK2_HUMAN	J3KP65_HUMAN	A0A0A0MQU7_HUMAN
biological_process	GO:0001657	ureteric bud development	8	36	0.222222	0.977264	0.0393181	1	1	ROBO2_HUMAN	SALL1_HUMAN	SIM1_HUMAN	SPY1_HUMAN	SDC1_HUMAN	WT1_HUMAN	RET_HUMAN	CER1_HUMAN
biological_process	GO:0006402	mRNA catabolic process	8	56	0.142857	0.998027	0.00289322	1	1	SLN14_HUMAN	PNPT1_HUMAN	ZHX2_HUMAN	YTHD2_HUMAN	MET16_HUMAN	CNO11_HUMAN	A0A494C1G3_HUMAN	M0R0C6_HUMAN
biological_process	GO:0008033	tRNA processing	8	69	0.115942	1.65757e-05	0.999992	0.022	1	RPP21_HUMAN	POP1_HUMAN	A0A7I2V4F0_HUMAN	A0A087X2G1_HUMAN	A0A087WZ71_HUMAN	A0A7I2V2M5_HUMAN	A0A0A0MTQ0_HUMAN	A0A7I2V430_HUMAN
biological_process	GO:0071773	cellular response to BMP stimulus	8	32	0.25	0.965355	0.0510531	1	1	RUNX2_HUMAN	ACVL1_HUMAN	DLX1_HUMAN	ATS7_HUMAN	DLX5_HUMAN	ATS12_HUMAN	ACVR1_HUMAN	CER1_HUMAN
biological_process	GO:0000290	deadenylation-dependent decapping of nuclear-transcribed mRNA	8	19	0.421053	0.994391	0.0199093	1	1	PATL2_HUMAN	DCP1A_HUMAN	PATL1_HUMAN	H0YN77_HUMAN	A0A087WT55_HUMAN	A0A087WVE6_HUMAN	H0YNY1_HUMAN	H0YMQ2_HUMAN
biological_process	GO:0043029	T cell homeostasis	8	30	0.266667	0.767799	0.363309	1	1	BCL2_HUMAN	JAK3_HUMAN	SIT1_HUMAN	STA5B_HUMAN	ZC3H8_HUMAN	RC3H1_HUMAN	RC3H2_HUMAN	A0A087WXW3_HUMAN
biological_process	GO:0098962	regulation of postsynaptic neurotransmitter receptor activity	8	17	0.470588	0.99921	0.00367871	1	1	SHSA6_HUMAN	DLGP1_HUMAN	DLGP4_HUMAN	HOME1_HUMAN	DLGP2_HUMAN	NPTX1_HUMAN	DLGP3_HUMAN	AKAP9_HUMAN
biological_process	GO:0050766	positive regulation of phagocytosis	8	46	0.173913	0.40283	0.711135	1	1	APOA1_HUMAN	APOA2_HUMAN	BCR_HUMAN	NOD2_HUMAN	IL2RB_HUMAN	IFNG_HUMAN	DOCK2_HUMAN	CLC7A_HUMAN
biological_process	GO:0040018	positive regulation of multicellular organism growth	8	32	0.25	0.881593	0.223009	1	1	BCL2_HUMAN	BBS4_HUMAN	CHD7_HUMAN	CREB1_HUMAN	NIPBL_HUMAN	SPTN4_HUMAN	MKKS_HUMAN	STA5B_HUMAN
biological_process	GO:0001782	B cell homeostasis	8	24	0.333333	0.991442	0.0231673	1	1	BCL2_HUMAN	CAMLG_HUMAN	MEF2C_HUMAN	RC3H1_HUMAN	RC3H2_HUMAN	DOC10_HUMAN	DOC11_HUMAN	CIKS_HUMAN
biological_process	GO:0051310	metaphase plate congression	8	13	0.615385	0.997364	0.00588236	1	1	INCE_HUMAN	MEIOC_HUMAN	CENPF_HUMAN	FA83D_HUMAN	KIF22_HUMAN	SPICE_HUMAN	KIF2C_HUMAN	CENPE_HUMAN
biological_process	GO:0045814	negative regulation of gene expression, epigenetic	8	17	0.470588	0.998621	0.00645098	1	1	EPC1_HUMAN	MORC2_HUMAN	PPHLN_HUMAN	SIR6_HUMAN	RIF1_HUMAN	SMYD5_HUMAN	TASOR_HUMAN	H2AW_HUMAN
biological_process	GO:1990090	cellular response to nerve growth factor stimulus	8	33	0.242424	0.828258	0.281152	1	1	ELAV4_HUMAN	E2F1_HUMAN	NTRK3_HUMAN	NTRK2_HUMAN	KDIS_HUMAN	FOXO3_HUMAN	KAT2A_HUMAN	A4_HUMAN
biological_process	GO:0060307	regulation of ventricular cardiac muscle cell membrane repolarization	8	22	0.363636	0.983859	0.0464255	1	1	ANK2_HUMAN	KCNH6_HUMAN	KCNQ1_HUMAN	KCNH2_HUMAN	SCN5A_HUMAN	AKAP9_HUMAN	CAPON_HUMAN	CA2D1_HUMAN
biological_process	GO:0043473	pigmentation	8	24	0.333333	0.997463	0.00495488	1	1	LYST_HUMAN	HPS3_HUMAN	FIG4_HUMAN	NF1_HUMAN	SZT2_HUMAN	TYRO_HUMAN	MYSM1_HUMAN	HPS5_HUMAN
biological_process	GO:0001732	formation of cytoplasmic translation initiation complex	8	52	0.153846	0.365395	0.763661	1	1	EIF3K_HUMAN	EIF3A_HUMAN	EIF3D_HUMAN	A0A7I2YQI6_HUMAN	A0A7I2V607_HUMAN	A0A7I2YQI2_HUMAN	A0A087WVB9_HUMAN	K7ERF1_HUMAN
biological_process	GO:0031641	regulation of myelination	8	21	0.380952	0.996158	0.00956178	1	1	LGI4_HUMAN	KIF14_HUMAN	CTNB1_HUMAN	SIR2_HUMAN	PTPRZ_HUMAN	TNR1B_HUMAN	TEN4_HUMAN	THYG_HUMAN
biological_process	GO:0045931	positive regulation of mitotic cell cycle	8	31	0.258065	0.898581	0.146982	1	1	MEIS2_HUMAN	BRCA2_HUMAN	STA5B_HUMAN	MDM2_HUMAN	SMOC2_HUMAN	UBP2_HUMAN	A4_HUMAN	ABL1_HUMAN
biological_process	GO:0038095	Fc-epsilon receptor signaling pathway	8	67	0.119403	0.100956	0.948198	1	1	M3K1_HUMAN	VAV_HUMAN	IKKB_HUMAN	BTK_HUMAN	G3V5Z7_HUMAN	G3V295_HUMAN	F5GX11_HUMAN	G3V3I1_HUMAN
biological_process	GO:0061484	hematopoietic stem cell homeostasis	8	20	0.4	0.994391	0.0199093	1	1	DSRAD_HUMAN	EXT1_HUMAN	MUCEN_HUMAN	ZN251_HUMAN	UBP2L_HUMAN	AGRG1_HUMAN	ARHG5_HUMAN	Q5T321_HUMAN
biological_process	GO:0032717	negative regulation of interleukin-8 production	8	20	0.4	0.994391	0.0199093	1	1	CATIN_HUMAN	SRCRL_HUMAN	PTN22_HUMAN	TLR9_HUMAN	MABP1_HUMAN	IL6RA_HUMAN	BPI_HUMAN	A0A0B4J1S7_HUMAN
biological_process	GO:0033627	cell adhesion mediated by integrin	8	26	0.307692	0.969213	0.054948	1	1	MMRN1_HUMAN	ITB4_HUMAN	EXT1_HUMAN	FYB2_HUMAN	ITA2_HUMAN	ITB3_HUMAN	ICAM1_HUMAN	H3BM21_HUMAN
biological_process	GO:0044255	cellular lipid metabolic process	8	27	0.296296	2.3101e-20	1	0	1	SCAP_HUMAN	ZN670_HUMAN	ATF2_HUMAN	LPIN2_HUMAN	LPIN3_HUMAN	ABHD1_HUMAN	F135A_HUMAN	F135B_HUMAN
biological_process	GO:0007205	protein kinase C-activating G protein-coupled receptor signaling pathway	8	41	0.195122	0.664786	0.488127	1	1	DGKI_HUMAN	DGKQ_HUMAN	PARD3_HUMAN	E7EM72_HUMAN	E9PFX6_HUMAN	A0A087WV00_HUMAN	H0YA20_HUMAN	E7EWQ4_HUMAN
biological_process	GO:0090162	establishment of epithelial cell polarity	8	17	0.470588	0.996829	0.00904955	1	1	FRM4B_HUMAN	FBF1_HUMAN	FRM4A_HUMAN	PARD3_HUMAN	CLAP1_HUMAN	K7EPQ1_HUMAN	A0A0R4J2E4_HUMAN	K7ENL6_HUMAN
biological_process	GO:0051491	positive regulation of filopodium assembly	8	33	0.242424	0.862379	0.250333	1	1	CCL21_HUMAN	P85A_HUMAN	SRF_HUMAN	TEN1_HUMAN	TEN2_HUMAN	FBP1L_HUMAN	DOC11_HUMAN	AGRIN_HUMAN
biological_process	GO:0070509	calcium ion import	8	28	0.285714	0.890032	0.165542	1	1	CAC1C_HUMAN	CACB2_HUMAN	CAC1G_HUMAN	CAC1F_HUMAN	CAC1E_HUMAN	CAC1A_HUMAN	CAC1B_HUMAN	A0A0B4J1X2_HUMAN
biological_process	GO:0007216	G protein-coupled glutamate receptor signaling pathway	8	26	0.307692	0.963311	0.0891876	1	1	DGLB_HUMAN	DGLA_HUMAN	HOME1_HUMAN	HOME2_HUMAN	HOME3_HUMAN	M0QZN1_HUMAN	A0A0G2JN34_HUMAN	M0R2U7_HUMAN
biological_process	GO:0034470	ncRNA processing	8	10	0.8	0.0550278	0.955317	1	1	A0A0G2JHI3_HUMAN	A0A096LP39_HUMAN	A0A0G2JJ26_HUMAN	A0A140TA46_HUMAN	A0A140T9R9_HUMAN	A0A0G2JIT5_HUMAN	A0A0G2JJ52_HUMAN	A0A0G2JKY0_HUMAN
biological_process	GO:0002479	antigen processing and presentation of exogenous peptide antigen via MHC class I, TAP-dependent	8	47	0.170213	0.495661	0.653188	1	1	TAP1_HUMAN	IKKB_HUMAN	A0A140T9T7_HUMAN	G3V5Z7_HUMAN	G3V295_HUMAN	A0A2R8Y4Y0_HUMAN	F5GX11_HUMAN	G3V3I1_HUMAN
biological_process	GO:0043392	negative regulation of DNA binding	7	31	0.225806	0.594286	0.544316	1	1	E2F1_HUMAN	HABP4_HUMAN	ILRUN_HUMAN	SP100_HUMAN	ZN462_HUMAN	ZFP90_HUMAN	IF16_HUMAN
biological_process	GO:0035563	positive regulation of chromatin binding	7	14	0.5	0.998655	0.00719609	1	1	KDM4D_HUMAN	HMBX1_HUMAN	PARP9_HUMAN	ZN618_HUMAN	DDX11_HUMAN	DTX3L_HUMAN	COE2_HUMAN
biological_process	GO:0071353	cellular response to interleukin-4	7	25	0.28	0.899245	0.196858	1	1	RUFY4_HUMAN	ATS13_HUMAN	PML_HUMAN	FAS_HUMAN	SHPK_HUMAN	XBP1_HUMAN	KEAP1_HUMAN
biological_process	GO:0060325	face morphogenesis	7	31	0.225806	0.803142	0.339208	1	1	PKHA1_HUMAN	EP300_HUMAN	NIPBL_HUMAN	MYH3_HUMAN	SGPL1_HUMAN	PARPT_HUMAN	DLX5_HUMAN
biological_process	GO:0010718	positive regulation of epithelial to mesenchymal transition	7	45	0.155556	0.80427	0.305406	1	1	BCL9L_HUMAN	CTNB1_HUMAN	NOE1_HUMAN	WWTR1_HUMAN	DAB2_HUMAN	TGFB2_HUMAN	TGFI1_HUMAN
biological_process	GO:0051894	positive regulation of focal adhesion assembly	7	26	0.269231	0.910812	0.187429	1	1	FMN1_HUMAN	E41L5_HUMAN	ROCK1_HUMAN	TSC1_HUMAN	MYOC_HUMAN	M4K4_HUMAN	ABL1_HUMAN
biological_process	GO:0002092	positive regulation of receptor internalization	7	26	0.269231	0.9297	0.148765	1	1	ANGP1_HUMAN	AP2M1_HUMAN	INSR_HUMAN	GREM1_HUMAN	EGF_HUMAN	SCYL2_HUMAN	AHI1_HUMAN
biological_process	GO:0034612	response to tumor necrosis factor	7	36	0.194444	0.291787	0.758725	1	1	CH3L1_HUMAN	RIPK1_HUMAN	TNR11_HUMAN	YTDC2_HUMAN	IGBP1_HUMAN	MBP_HUMAN	GGT5_HUMAN
biological_process	GO:1902808	positive regulation of cell cycle G1/S phase transition	7	15	0.466667	0.952078	0.0880177	1	1	NANP8_HUMAN	FA83D_HUMAN	PAF1_HUMAN	P63_HUMAN	CRNN_HUMAN	GLI1_HUMAN	DDRGK_HUMAN
biological_process	GO:2000352	negative regulation of endothelial cell apoptotic process	7	30	0.233333	0.827943	0.307064	1	1	NF2L2_HUMAN	ANGP1_HUMAN	ANGL4_HUMAN	SCG2_HUMAN	TNAP3_HUMAN	ICAM1_HUMAN	ABL1_HUMAN
biological_process	GO:0070328	triglyceride homeostasis	7	33	0.212121	0.813147	0.307512	1	1	APOA1_HUMAN	ANGL3_HUMAN	ANGL4_HUMAN	MED13_HUMAN	PLPL8_HUMAN	LIPC_HUMAN	APOA4_HUMAN
biological_process	GO:0043001	Golgi to plasma membrane protein transport	7	30	0.233333	0.942787	0.109622	1	1	KI13A_HUMAN	GOGA4_HUMAN	MACF1_HUMAN	ANK3_HUMAN	SPTB2_HUMAN	GGA2_HUMAN	GGA3_HUMAN
biological_process	GO:0006520	cellular amino acid metabolic process	7	42	0.166667	2.05694e-10	1	0	1	SCLY_HUMAN	1A1L1_HUMAN	GGT5_HUMAN	H7C2E4_HUMAN	E5RJX9_HUMAN	A0A1B0GW23_HUMAN	E5RI59_HUMAN
biological_process	GO:0030513	positive regulation of BMP signaling pathway	7	40	0.175	0.54171	0.620664	1	1	ACVL1_HUMAN	NOTC1_HUMAN	EGLN_HUMAN	NUMA1_HUMAN	SUH_HUMAN	NEO1_HUMAN	Q59FP8_HUMAN
biological_process	GO:0001818	negative regulation of cytokine production	7	32	0.21875	0.778006	0.269142	1	1	PE2R4_HUMAN	TIA1_HUMAN	HDAC9_HUMAN	LRC32_HUMAN	N4BP1_HUMAN	NDRG2_HUMAN	BTK_HUMAN
biological_process	GO:0042177	negative regulation of protein catabolic process	7	36	0.194444	0.592143	0.499526	1	1	IRAK3_HUMAN	FMN2_HUMAN	AGRB1_HUMAN	NOS2_HUMAN	SIR2_HUMAN	NRG1_HUMAN	PIN1_HUMAN
biological_process	GO:0043491	protein kinase B signaling	7	56	0.125	0.76448	0.291151	1	1	PK3CA_HUMAN	PAX2_HUMAN	SIR2_HUMAN	SETX_HUMAN	P55G_HUMAN	UFO_HUMAN	TSC2_HUMAN
biological_process	GO:0033147	negative regulation of intracellular estrogen receptor signaling pathway	7	16	0.4375	0.995936	0.0170623	1	1	BRCA1_HUMAN	KANK2_HUMAN	P63_HUMAN	ZN366_HUMAN	VPS11_HUMAN	CNOT1_HUMAN	CNOT2_HUMAN
biological_process	GO:0007062	sister chromatid cohesion	7	36	0.194444	0.975834	0.0420145	1	1	MRE11_HUMAN	SMC1B_HUMAN	SMC1A_HUMAN	ESCO1_HUMAN	KIF22_HUMAN	SMC3_HUMAN	DDX11_HUMAN
biological_process	GO:0120163	negative regulation of cold-induced thermogenesis	7	48	0.145833	0.322513	0.803827	1	1	NOTC1_HUMAN	LAMA4_HUMAN	NR1H2_HUMAN	SUH_HUMAN	NRDC_HUMAN	NR1D1_HUMAN	A0A0A0MQS9_HUMAN
biological_process	GO:0007218	neuropeptide signaling pathway	7	111	0.0630631	0.000221816	0.999938	0.242	1	NMU_HUMAN	NPFF_HUMAN	GPR37_HUMAN	SSR3_HUMAN	NXPH4_HUMAN	TEN1_HUMAN	UCN1_HUMAN
biological_process	GO:0009314	response to radiation	7	25	0.28	0.984362	0.0206636	1	1	SMC1A_HUMAN	FKBPL_HUMAN	BCL2_HUMAN	ANGP2_HUMAN	PNKP_HUMAN	POLH_HUMAN	TNR11_HUMAN
biological_process	GO:0035633	maintenance of blood-brain barrier	7	31	0.225806	0.955805	0.0944748	1	1	PECA1_HUMAN	S12A2_HUMAN	ZO3_HUMAN	WNK3_HUMAN	ZO1_HUMAN	MBP_HUMAN	DMD_HUMAN
biological_process	GO:0006268	DNA unwinding involved in DNA replication	7	23	0.304348	0.953574	0.113731	1	1	HMGA1_HUMAN	MCM3_HUMAN	PSF3_HUMAN	RECQ4_HUMAN	WRN_HUMAN	RECQ5_HUMAN	PSF2_HUMAN
biological_process	GO:0006812	cation transport	7	32	0.21875	0.0130862	0.989219	1	1	PK2L1_HUMAN	PK1L3_HUMAN	CNGA3_HUMAN	PIEZ2_HUMAN	PIEZ1_HUMAN	F8WD55_HUMAN	A0A0C4DFT0_HUMAN
biological_process	GO:0035774	positive regulation of insulin secretion involved in cellular response to glucose stimulus	7	31	0.225806	0.803142	0.339208	1	1	PLPL9_HUMAN	HIF1A_HUMAN	C2C2L_HUMAN	RFX6_HUMAN	STX4_HUMAN	PHLD_HUMAN	BAIP3_HUMAN
biological_process	GO:1903077	negative regulation of protein localization to plasma membrane	7	21	0.333333	0.942484	0.127119	1	1	LIPA1_HUMAN	AP2M1_HUMAN	DAB2_HUMAN	PICAL_HUMAN	NUMB_HUMAN	2A5A_HUMAN	B2CL1_HUMAN
biological_process	GO:0042542	response to hydrogen peroxide	7	42	0.166667	0.794834	0.275946	1	1	STK24_HUMAN	BCL2_HUMAN	PR15B_HUMAN	SDC1_HUMAN	TXNIP_HUMAN	NU5M_HUMAN	APTX_HUMAN
biological_process	GO:0007566	embryo implantation	7	41	0.170732	0.648996	0.481837	1	1	FKBP4_HUMAN	PRLR_HUMAN	RPA2_HUMAN	RECK_HUMAN	UBFL1_HUMAN	TROP_HUMAN	HMX3_HUMAN
biological_process	GO:0001942	hair follicle development	7	41	0.170732	0.915046	0.130934	1	1	LDB2_HUMAN	FZD3_HUMAN	LAMA5_HUMAN	LDB1_HUMAN	TGFB2_HUMAN	TNR19_HUMAN	A0A6I8PRU0_HUMAN
biological_process	GO:0032526	response to retinoic acid	7	47	0.148936	0.637807	0.454523	1	1	SYNJ1_HUMAN	MPRI_HUMAN	SRBP1_HUMAN	OVCA2_HUMAN	SP100_HUMAN	PTC1_HUMAN	ASXL1_HUMAN
biological_process	GO:0035116	embryonic hindlimb morphogenesis	7	28	0.25	0.872881	0.244956	1	1	NOTC1_HUMAN	FTM_HUMAN	CTNB1_HUMAN	CHD7_HUMAN	MED1_HUMAN	TBX4_HUMAN	P63_HUMAN
biological_process	GO:0048843	negative regulation of axon extension involved in axon guidance	7	27	0.259259	0.892767	0.215497	1	1	PLXA3_HUMAN	SEM4A_HUMAN	SEM4G_HUMAN	SEM4D_HUMAN	RYK_HUMAN	SEM3B_HUMAN	SEM6C_HUMAN
biological_process	GO:0030163	protein catabolic process	7	42	0.166667	0.975009	0.0293594	1	1	PJA1_HUMAN	TSSP_HUMAN	LRSM1_HUMAN	NOTC1_HUMAN	EXT1_HUMAN	TIF1A_HUMAN	A0A0C4DFQ5_HUMAN
biological_process	GO:0043542	endothelial cell migration	7	32	0.21875	0.92312	0.103673	1	1	PLXD1_HUMAN	PK3CA_HUMAN	PKHG5_HUMAN	PAXI1_HUMAN	NOS3_HUMAN	SCG2_HUMAN	ABL1_HUMAN
biological_process	GO:0010800	positive regulation of peptidyl-threonine phosphorylation	7	28	0.25	0.872881	0.244956	1	1	RIPK2_HUMAN	CH3L1_HUMAN	EGF_HUMAN	STOX1_HUMAN	TB182_HUMAN	WNK3_HUMAN	A4_HUMAN
biological_process	GO:0048662	negative regulation of smooth muscle cell proliferation	7	40	0.175	0.675608	0.447835	1	1	PI2R_HUMAN	NOS3_HUMAN	PRGC1_HUMAN	TNAP3_HUMAN	IBP3_HUMAN	IFNG_HUMAN	NDRG2_HUMAN
biological_process	GO:0040014	regulation of multicellular organism growth	7	35	0.2	0.760787	0.335812	1	1	PK3CA_HUMAN	MBD5_HUMAN	HTRA2_HUMAN	SGPL1_HUMAN	STA5B_HUMAN	STA5A_HUMAN	A4_HUMAN
biological_process	GO:1900273	positive regulation of long-term synaptic potentiation	7	23	0.304348	0.953574	0.113731	1	1	CRTC1_HUMAN	IGS11_HUMAN	SQSTM_HUMAN	STAU1_HUMAN	RELN_HUMAN	E2AK4_HUMAN	A4_HUMAN
biological_process	GO:0060828	regulation of canonical Wnt signaling pathway	7	32	0.21875	0.789401	0.253784	1	1	CCYL3_HUMAN	DACT1_HUMAN	OTUL_HUMAN	AMER3_HUMAN	AMER1_HUMAN	CCYL2_HUMAN	CTND2_HUMAN
biological_process	GO:0046847	filopodium assembly	7	19	0.368421	0.920055	0.131784	1	1	SRGP2_HUMAN	ARHG4_HUMAN	ITB4_HUMAN	FGD6_HUMAN	FGD5_HUMAN	VSTM5_HUMAN	TTYH1_HUMAN
biological_process	GO:0048013	ephrin receptor signaling pathway	7	46	0.152174	0.718723	0.412615	1	1	SI1L1_HUMAN	KALRN_HUMAN	ARG28_HUMAN	EPHB1_HUMAN	SSXT_HUMAN	ANS1B_HUMAN	ANS1A_HUMAN
biological_process	GO:0070536	protein K63-linked deubiquitination	7	30	0.233333	0.854018	0.253929	1	1	ABRX2_HUMAN	OTUD4_HUMAN	SPAT2_HUMAN	TNAP3_HUMAN	UBP33_HUMAN	ZRAN1_HUMAN	U17L2_HUMAN
biological_process	GO:0071392	cellular response to estradiol stimulus	7	41	0.170732	0.511873	0.647951	1	1	CRHBP_HUMAN	ESR2_HUMAN	ITA2_HUMAN	NCOA3_HUMAN	LCOR_HUMAN	NRIP1_HUMAN	SSR3_HUMAN
biological_process	GO:0043687	post-translational protein modification	7	69	0.101449	0.114717	0.932692	1	1	UBA3_HUMAN	A0A5F9UQ55_HUMAN	G3V5Z7_HUMAN	A0A5F9ZHS2_HUMAN	G3V295_HUMAN	F5GX11_HUMAN	G3V3I1_HUMAN
biological_process	GO:0006487	protein N-linked glycosylation	7	63	0.111111	0.0277196	0.985705	1	1	RPN2_HUMAN	RPN1_HUMAN	OST48_HUMAN	FUT8_HUMAN	DOPP1_HUMAN	GFPT1_HUMAN	Q5JYR7_HUMAN
biological_process	GO:0061025	membrane fusion	7	28	0.25	0.377906	0.69733	1	1	HACE1_HUMAN	RIMS1_HUMAN	VP33B_HUMAN	USO1_HUMAN	HUWE1_HUMAN	MYOF_HUMAN	DYSF_HUMAN
biological_process	GO:0001937	negative regulation of endothelial cell proliferation	7	32	0.21875	0.743714	0.391638	1	1	ACVL1_HUMAN	EGLN_HUMAN	COT2_HUMAN	NF1_HUMAN	SCG2_HUMAN	PTPRM_HUMAN	XDH_HUMAN
biological_process	GO:0007004	telomere maintenance via telomerase	7	23	0.304348	0.95141	0.0832199	1	1	MRE11_HUMAN	TERF1_HUMAN	TB182_HUMAN	TE2IP_HUMAN	TELO2_HUMAN	RFC1_HUMAN	RAD50_HUMAN
biological_process	GO:0001510	RNA methylation	7	29	0.241379	0.701061	0.389186	1	1	NOP2_HUMAN	NSUN2_HUMAN	TRM7_HUMAN	RBM15_HUMAN	A0A087WW35_HUMAN	B3KW44_HUMAN	H7C2P8_HUMAN
biological_process	GO:0051044	positive regulation of membrane protein ectodomain proteolysis	7	17	0.411765	0.993549	0.0244902	1	1	SH319_HUMAN	TNR1B_HUMAN	PHLD_HUMAN	RGMA_HUMAN	NRDC_HUMAN	IFNG_HUMAN	A4_HUMAN
biological_process	GO:0017015	regulation of transforming growth factor beta receptor signaling pathway	7	26	0.269231	0.963579	0.0561962	1	1	EGLN_HUMAN	ITA3_HUMAN	SMUF2_HUMAN	LTBP4_HUMAN	ZEB1_HUMAN	TGBR3_HUMAN	F6TDF5_HUMAN
biological_process	GO:0047496	vesicle transport along microtubule	7	16	0.4375	0.960966	0.0774677	1	1	TRAK2_HUMAN	HAP1_HUMAN	KINH_HUMAN	DC1I1_HUMAN	BICL1_HUMAN	GRP1_HUMAN	HD_HUMAN
biological_process	GO:0007141	male meiosis I	7	28	0.25	0.872881	0.244956	1	1	MEIOC_HUMAN	FOXJ3_HUMAN	ING2_HUMAN	BRCA2_HUMAN	BRDT_HUMAN	FOXJ2_HUMAN	SYCP3_HUMAN
biological_process	GO:0007130	synaptonemal complex assembly	7	27	0.259259	0.892767	0.215497	1	1	MEIOC_HUMAN	SYCE2_HUMAN	SYCP2_HUMAN	MLH3_HUMAN	TEX15_HUMAN	HORM1_HUMAN	EHMT2_HUMAN
biological_process	GO:0045921	positive regulation of exocytosis	7	21	0.333333	0.837059	0.238834	1	1	SYTL4_HUMAN	PLPL9_HUMAN	EXPH5_HUMAN	UN13D_HUMAN	RB27B_HUMAN	CLAP1_HUMAN	CLAP2_HUMAN
biological_process	GO:0090398	cellular senescence	7	40	0.175	0.82312	0.255991	1	1	MAPK5_HUMAN	KAT6A_HUMAN	CDN1B_HUMAN	PML_HUMAN	SRF_HUMAN	TERF2_HUMAN	ATM_HUMAN
biological_process	GO:2000251	positive regulation of actin cytoskeleton reorganization	7	19	0.368421	0.985811	0.0453374	1	1	FES_HUMAN	HCLS1_HUMAN	HAX1_HUMAN	NTRK3_HUMAN	BAIP2_HUMAN	CSF3_HUMAN	ABL1_HUMAN
biological_process	GO:1903861	positive regulation of dendrite extension	7	23	0.304348	0.953574	0.113731	1	1	SYT3_HUMAN	RIMS2_HUMAN	SMUF1_HUMAN	RN157_HUMAN	RIMS1_HUMAN	UN13A_HUMAN	CPNE5_HUMAN
biological_process	GO:0030032	lamellipodium assembly	7	36	0.194444	0.742229	0.360607	1	1	GRDN_HUMAN	ARHG4_HUMAN	CARL1_HUMAN	NUP85_HUMAN	WASF3_HUMAN	PTPRO_HUMAN	ARFP2_HUMAN
biological_process	GO:0003180	aortic valve morphogenesis	7	33	0.212121	0.749667	0.404431	1	1	ROBO2_HUMAN	ROCK2_HUMAN	NOTC1_HUMAN	NOS3_HUMAN	NFAC1_HUMAN	ROBO1_HUMAN	ROCK1_HUMAN
biological_process	GO:0002062	chondrocyte differentiation	7	46	0.152174	0.842757	0.219007	1	1	RUNX2_HUMAN	ATS7_HUMAN	MEF2C_HUMAN	PHLD_HUMAN	ATS12_HUMAN	MEF2D_HUMAN	A0A7I2PJA1_HUMAN
biological_process	GO:0072332	intrinsic apoptotic signaling pathway by p53 class mediator	7	25	0.28	0.997902	0.00452398	1	1	E2F1_HUMAN	MBB1A_HUMAN	P53_HUMAN	TNR27_HUMAN	IF16_HUMAN	DDX5_HUMAN	JMY_HUMAN
biological_process	GO:0048935	peripheral nervous system neuron development	7	16	0.4375	0.985811	0.0453374	1	1	ETV1_HUMAN	NTRK2_HUMAN	ONEC2_HUMAN	HXD10_HUMAN	F8WEH6_HUMAN	C9J4P4_HUMAN	B5MCT2_HUMAN
biological_process	GO:0006376	mRNA splice site selection	7	34	0.205882	0.787067	0.332708	1	1	KHDC4_HUMAN	CELF1_HUMAN	SRS10_HUMAN	SETX_HUMAN	CELF3_HUMAN	CELF2_HUMAN	E9PC62_HUMAN
biological_process	GO:0021510	spinal cord development	7	28	0.25	0.997774	0.0044438	1	1	PKD1_HUMAN	NF1_HUMAN	PLDX1_HUMAN	PKD2_HUMAN	VITRN_HUMAN	BAG3_HUMAN	MED12_HUMAN
biological_process	GO:0048025	negative regulation of mRNA splicing, via spliceosome	7	22	0.318182	0.964108	0.0932465	1	1	SRSF4_HUMAN	SRS10_HUMAN	SRS12_HUMAN	SFSWA_HUMAN	U2AF2_HUMAN	RBM10_HUMAN	ACINU_HUMAN
biological_process	GO:0030521	androgen receptor signaling pathway	7	24	0.291667	0.937227	0.115521	1	1	TMF1_HUMAN	ARI1A_HUMAN	DAXX_HUMAN	FKBP4_HUMAN	DDX17_HUMAN	ZMIZ1_HUMAN	DDX5_HUMAN
biological_process	GO:0051966	regulation of synaptic transmission, glutamatergic	7	32	0.21875	0.341653	0.762909	1	1	DGKI_HUMAN	MEF2C_HUMAN	PLPR4_HUMAN	UCN1_HUMAN	UN13A_HUMAN	HOME1_HUMAN	A0A087WV00_HUMAN
biological_process	GO:0048147	negative regulation of fibroblast proliferation	7	29	0.241379	0.827943	0.307064	1	1	PEX2_HUMAN	P53_HUMAN	NF1_HUMAN	MORC3_HUMAN	NLRC3_HUMAN	TNFB_HUMAN	CLM8_HUMAN
biological_process	GO:0051928	positive regulation of calcium ion transport	7	28	0.25	0.0819137	0.94893	1	1	MYLK_HUMAN	ANK2_HUMAN	CACB2_HUMAN	JAK3_HUMAN	WNK3_HUMAN	HOME1_HUMAN	EFC4B_HUMAN
biological_process	GO:0043507	positive regulation of JUN kinase activity	7	42	0.166667	0.482504	0.674043	1	1	M3K12_HUMAN	ERN2_HUMAN	M4K2_HUMAN	TNR11_HUMAN	TAOK3_HUMAN	TLR9_HUMAN	ARHG5_HUMAN
biological_process	GO:1990869	cellular response to chemokine	7	17	0.411765	0.436266	0.677565	1	1	STK39_HUMAN	CCL21_HUMAN	OXSR1_HUMAN	S12A2_HUMAN	WNK1_HUMAN	ZC12A_HUMAN	DOCK8_HUMAN
biological_process	GO:0043691	reverse cholesterol transport	7	19	0.368421	0.985811	0.0453374	1	1	APOA1_HUMAN	APOA2_HUMAN	ABCA5_HUMAN	LIPE_HUMAN	LIPC_HUMAN	APOA4_HUMAN	A0A0A0MQU7_HUMAN
biological_process	GO:0048709	oligodendrocyte differentiation	7	24	0.291667	0.977264	0.0393181	1	1	NOTC1_HUMAN	BNIP3_HUMAN	NRG1_HUMAN	PTPRZ_HUMAN	NTRK2_HUMAN	MYRF_HUMAN	GLI3_HUMAN
biological_process	GO:0002076	osteoblast development	7	20	0.35	0.980091	0.0590294	1	1	RUNX2_HUMAN	LRP5_HUMAN	MEN1_HUMAN	SATB2_HUMAN	HXA2_HUMAN	GLI2_HUMAN	A0A7I2PJA1_HUMAN
biological_process	GO:0000387	spliceosomal snRNP assembly	7	47	0.148936	0.397383	0.725319	1	1	SART3_HUMAN	DDX20_HUMAN	TGS1_HUMAN	GEMI4_HUMAN	GEMI5_HUMAN	ANM5_HUMAN	I3L2C7_HUMAN
biological_process	GO:0000289	nuclear-transcribed mRNA poly(A) tail shortening	7	16	0.4375	0.999052	0.00337647	1	1	SMAG2_HUMAN	PAN2_HUMAN	SMAG1_HUMAN	TUT4_HUMAN	PAN3_HUMAN	CNOT2_HUMAN	A0A0C4DFZ9_HUMAN
biological_process	GO:0031334	positive regulation of protein-containing complex assembly	7	54	0.12963	0.985164	0.0208833	1	1	FNIP2_HUMAN	FAF1_HUMAN	NRG1_HUMAN	ICE1_HUMAN	IFNG_HUMAN	BMF_HUMAN	CLC7A_HUMAN
biological_process	GO:0045600	positive regulation of fat cell differentiation	7	51	0.137255	0.0919186	0.953459	1	1	LRP5_HUMAN	KLF5_HUMAN	CREB1_HUMAN	STK4_HUMAN	XBP1_HUMAN	ZC12A_HUMAN	ASXL2_HUMAN
biological_process	GO:0090161	Golgi ribbon formation	7	13	0.538462	0.999313	0.00427063	1	1	STX6_HUMAN	GCC2_HUMAN	STX16_HUMAN	TRIPB_HUMAN	MY18A_HUMAN	GOGA2_HUMAN	ANM5_HUMAN
biological_process	GO:0070059	intrinsic apoptotic signaling pathway in response to endoplasmic reticulum stress	7	36	0.194444	0.31137	0.795491	1	1	ITPR1_HUMAN	BCL2_HUMAN	ERN2_HUMAN	PML_HUMAN	P53_HUMAN	PR15A_HUMAN	TR10B_HUMAN
biological_process	GO:0007250	activation of NF-kappaB-inducing kinase activity	7	23	0.304348	0.953574	0.113731	1	1	MALT1_HUMAN	CH3L1_HUMAN	TNF15_HUMAN	TR10B_HUMAN	TLR3_HUMAN	IRAK1_HUMAN	CAR14_HUMAN
biological_process	GO:0002755	MyD88-dependent toll-like receptor signaling pathway	7	42	0.166667	0.523466	0.627852	1	1	IRAK3_HUMAN	TLR1_HUMAN	TLR9_HUMAN	IRAK1_HUMAN	BTK_HUMAN	H0Y858_HUMAN	D6RAP2_HUMAN
biological_process	GO:0045088	regulation of innate immune response	7	21	0.333333	0.97806	0.0304546	1	1	NF2L2_HUMAN	ERAP1_HUMAN	RN135_HUMAN	PTN22_HUMAN	DHX58_HUMAN	DP13B_HUMAN	N4BP1_HUMAN
biological_process	GO:0061158	3'-UTR-mediated mRNA destabilization	7	17	0.411765	0.993549	0.0244902	1	1	RENT1_HUMAN	DHX36_HUMAN	FUBP2_HUMAN	TADBP_HUMAN	PKHN1_HUMAN	ZC12A_HUMAN	RC3H1_HUMAN
biological_process	GO:1902430	negative regulation of amyloid-beta formation	7	18	0.388889	0.990236	0.0338617	1	1	RTN3_HUMAN	HAP1_HUMAN	BIN1_HUMAN	ROCK1_HUMAN	PIN1_HUMAN	NTRK2_HUMAN	GGA3_HUMAN
biological_process	GO:0032967	positive regulation of collagen biosynthetic process	7	27	0.259259	0.892767	0.215497	1	1	SUCO_HUMAN	LARP6_HUMAN	EGLN_HUMAN	CR3L1_HUMAN	ITA2_HUMAN	SPB7_HUMAN	UCN1_HUMAN
biological_process	GO:0046326	positive regulation of glucose import	7	36	0.194444	0.662561	0.501211	1	1	NF2L2_HUMAN	SRBS1_HUMAN	INSR_HUMAN	KLF15_HUMAN	OSBL8_HUMAN	P85A_HUMAN	MEF2A_HUMAN
biological_process	GO:0071397	cellular response to cholesterol	7	17	0.411765	0.993549	0.0244902	1	1	LRP6_HUMAN	PHLD_HUMAN	NF2L1_HUMAN	PTC1_HUMAN	ASTRA_HUMAN	ASTRB_HUMAN	A0A1B0GUD6_HUMAN
biological_process	GO:0003148	outflow tract septum morphogenesis	7	25	0.28	0.926966	0.160979	1	1	ROBO2_HUMAN	LRP2_HUMAN	EGLN_HUMAN	FOG2_HUMAN	NRP2_HUMAN	ROBO1_HUMAN	TGFB2_HUMAN
biological_process	GO:0034394	protein localization to cell surface	7	32	0.21875	0.741606	0.365222	1	1	ANK2_HUMAN	ANGP1_HUMAN	CTNB1_HUMAN	SMUF1_HUMAN	STX4_HUMAN	GGA2_HUMAN	GGA3_HUMAN
biological_process	GO:1990573	potassium ion import across plasma membrane	7	44	0.159091	0.82352	0.281277	1	1	S12A7_HUMAN	S12A1_HUMAN	KCNQ1_HUMAN	KCNH2_HUMAN	S12A2_HUMAN	S12A8_HUMAN	S12A6_HUMAN
biological_process	GO:0021772	olfactory bulb development	7	18	0.388889	0.99918	0.00280847	1	1	KIF14_HUMAN	FTM_HUMAN	EOMES_HUMAN	CHD7_HUMAN	EXT1_HUMAN	DLX2_HUMAN	TTC8_HUMAN
biological_process	GO:0000956	nuclear-transcribed mRNA catabolic process	7	23	0.304348	0.991684	0.0133567	1	1	TR150_HUMAN	RENT1_HUMAN	DHX34_HUMAN	XRN1_HUMAN	RC3H1_HUMAN	DDX5_HUMAN	H7C5E4_HUMAN
biological_process	GO:0030488	tRNA methylation	7	31	0.225806	0.571865	0.592249	1	1	MET2B_HUMAN	MET2A_HUMAN	NSUN2_HUMAN	TYW2_HUMAN	TRM7_HUMAN	TARB1_HUMAN	ALKB8_HUMAN
biological_process	GO:0050801	ion homeostasis	7	16	0.4375	1.39879e-05	0.999991	0.018	1	STK39_HUMAN	B3AT_HUMAN	B3A3_HUMAN	WNK4_HUMAN	WNK2_HUMAN	WNK3_HUMAN	WNK1_HUMAN
biological_process	GO:0070593	dendrite self-avoidance	7	17	0.411765	0.993549	0.0244902	1	1	ROBO3_HUMAN	EXT1_HUMAN	ROBO4_HUMAN	TUTLA_HUMAN	MYPN_HUMAN	DSCAM_HUMAN	DSCL1_HUMAN
biological_process	GO:0051973	positive regulation of telomerase activity	7	36	0.194444	0.662561	0.501211	1	1	MAPK5_HUMAN	GRHL2_HUMAN	CTNB1_HUMAN	HMBX1_HUMAN	GREM1_HUMAN	PNKP_HUMAN	NAF1_HUMAN
biological_process	GO:0006471	protein ADP-ribosylation	7	33	0.212121	0.922532	0.140925	1	1	PARP8_HUMAN	SIR2_HUMAN	SIR6_HUMAN	PARP3_HUMAN	PARP9_HUMAN	PARPT_HUMAN	PARP6_HUMAN
biological_process	GO:0048596	embryonic camera-type eye morphogenesis	7	15	0.466667	0.9297	0.148765	1	1	SP3_HUMAN	HIPK1_HUMAN	PAX6_HUMAN	KDM2B_HUMAN	ZEB1_HUMAN	HIPK2_HUMAN	F6TDF5_HUMAN
biological_process	GO:0031663	lipopolysaccharide-mediated signaling pathway	7	33	0.212121	0.468516	0.663335	1	1	RIPK2_HUMAN	MALT1_HUMAN	NOS3_HUMAN	PTN22_HUMAN	LYRIC_HUMAN	IRAK1_HUMAN	BPI_HUMAN
biological_process	GO:0055013	cardiac muscle cell development	7	21	0.333333	0.980024	0.0374817	1	1	TITIN_HUMAN	MYH6_HUMAN	MY18B_HUMAN	MYH11_HUMAN	ALPK3_HUMAN	ASB2_HUMAN	ALPK2_HUMAN
biological_process	GO:0010801	negative regulation of peptidyl-threonine phosphorylation	7	17	0.411765	0.993549	0.0244902	1	1	DDIT4_HUMAN	DGKQ_HUMAN	SIR2_HUMAN	SPY2_HUMAN	PARD3_HUMAN	IF4G1_HUMAN	CADM4_HUMAN
biological_process	GO:0048705	skeletal system morphogenesis	7	32	0.21875	0.907596	0.122107	1	1	PKHA1_HUMAN	FMN1_HUMAN	SGPL1_HUMAN	PARPT_HUMAN	RYK_HUMAN	TBX4_HUMAN	ZFAN5_HUMAN
biological_process	GO:0007628	adult walking behavior	7	31	0.225806	0.803142	0.339208	1	1	KLHL1_HUMAN	HTRA2_HUMAN	CHD7_HUMAN	OXR1_HUMAN	SPTN4_HUMAN	HIPK2_HUMAN	DAB1_HUMAN
biological_process	GO:0061003	positive regulation of dendritic spine morphogenesis	7	18	0.388889	0.990236	0.0338617	1	1	CAPR1_HUMAN	CAPR2_HUMAN	DHX36_HUMAN	RELN_HUMAN	DREB_HUMAN	CUX2_HUMAN	BAIP2_HUMAN
biological_process	GO:0006892	post-Golgi vesicle-mediated transport	7	22	0.318182	0.969205	0.0489339	1	1	GBF1_HUMAN	SCAM2_HUMAN	SCAM1_HUMAN	MYO5A_HUMAN	AP4M1_HUMAN	J3KSS7_HUMAN	B3KNW1_HUMAN
biological_process	GO:0051382	kinetochore assembly	7	41	0.170732	0.551606	0.601536	1	1	CENPF_HUMAN	DLGP5_HUMAN	POGZ_HUMAN	CENPE_HUMAN	CENPT_HUMAN	H3BTR4_HUMAN	H3BUW2_HUMAN
biological_process	GO:2000310	regulation of NMDA receptor activity	7	16	0.4375	0.995213	0.0161405	1	1	CRHBP_HUMAN	MEF2C_HUMAN	RGRF2_HUMAN	RELN_HUMAN	RGRF1_HUMAN	DLG4_HUMAN	A4_HUMAN
biological_process	GO:0014066	regulation of phosphatidylinositol 3-kinase signaling	7	18	0.388889	0.982199	0.0302354	1	1	CEP55_HUMAN	PI51C_HUMAN	GRP1_HUMAN	PTN13_HUMAN	CEAM1_HUMAN	CRNN_HUMAN	H0Y432_HUMAN
biological_process	GO:0043113	receptor clustering	7	28	0.25	0.527982	0.602617	1	1	LRRC7_HUMAN	ITAL_HUMAN	SYGP1_HUMAN	MADCA_HUMAN	DLG4_HUMAN	AGRIN_HUMAN	A0A087X208_HUMAN
biological_process	GO:0008340	determination of adult lifespan	7	19	0.368421	0.985811	0.0453374	1	1	P53_HUMAN	SHIP1_HUMAN	PRDM2_HUMAN	TREX1_HUMAN	RAD54_HUMAN	RA54B_HUMAN	ATM_HUMAN
biological_process	GO:0060324	face development	7	19	0.368421	0.968584	0.0627734	1	1	GRHL2_HUMAN	BBS4_HUMAN	CHD7_HUMAN	MKKS_HUMAN	SRF_HUMAN	ZFAN5_HUMAN	RAF1_HUMAN
biological_process	GO:0045671	negative regulation of osteoclast differentiation	7	28	0.25	0.881593	0.223009	1	1	CTNB1_HUMAN	P85A_HUMAN	NF1_HUMAN	SHIP1_HUMAN	TR11B_HUMAN	TLR3_HUMAN	LIRB3_HUMAN
biological_process	GO:0032438	melanosome organization	7	23	0.304348	0.942484	0.127119	1	1	LYST_HUMAN	KI13A_HUMAN	FYV1_HUMAN	RAB32_HUMAN	PMEL_HUMAN	AP3D1_HUMAN	AP1G1_HUMAN
biological_process	GO:0045916	negative regulation of complement activation	7	10	0.7	0.993129	0.021702	1	1	A0A7I2V2D2_HUMAN	A0A7I2V5R3_HUMAN	H9KV48_HUMAN	E9PGN7_HUMAN	A0A7I2V2X2_HUMAN	A0A7I2V4I9_HUMAN	A0A087WUD9_HUMAN
biological_process	GO:0035458	cellular response to interferon-beta	7	33	0.212121	0.749667	0.404431	1	1	HTRA2_HUMAN	MNDA_HUMAN	PNPT1_HUMAN	STING_HUMAN	TREX1_HUMAN	TLR3_HUMAN	IF16_HUMAN
biological_process	GO:0050873	brown fat cell differentiation	7	32	0.21875	0.341676	0.782387	1	1	BNIP3_HUMAN	LAMB3_HUMAN	PRD16_HUMAN	PRGC1_HUMAN	ZN516_HUMAN	COE2_HUMAN	A0A0A0MQS9_HUMAN
biological_process	GO:0055007	cardiac muscle cell differentiation	7	19	0.368421	0.998242	0.00348857	1	1	KDM6B_HUMAN	SIK1_HUMAN	NRG1_HUMAN	TSC1_HUMAN	MYCD_HUMAN	AKP13_HUMAN	ASB2_HUMAN
biological_process	GO:0034614	cellular response to reactive oxygen species	7	37	0.189189	0.74622	0.326883	1	1	NCF1_HUMAN	PRGC2_HUMAN	ER6L2_HUMAN	PKD2_HUMAN	TREX1_HUMAN	KKCC2_HUMAN	BTK_HUMAN
biological_process	GO:0031018	endocrine pancreas development	7	20	0.35	0.694594	0.439418	1	1	MNX1_HUMAN	RFX6_HUMAN	RFX3_HUMAN	ONEC2_HUMAN	IL6RA_HUMAN	HNF1B_HUMAN	A0A0A0MQU7_HUMAN
biological_process	GO:0090136	epithelial cell-cell adhesion	7	35	0.2	0.692488	0.45829	1	1	KIFC3_HUMAN	SRF_HUMAN	PKHA7_HUMAN	DESP_HUMAN	CTNA1_HUMAN	E5RGY7_HUMAN	C9IZ88_HUMAN
biological_process	GO:0003203	endocardial cushion morphogenesis	7	18	0.388889	0.936134	0.127445	1	1	ACVL1_HUMAN	NOTC1_HUMAN	EGLN_HUMAN	NOS3_HUMAN	MDM2_HUMAN	TGFB2_HUMAN	ACVR1_HUMAN
biological_process	GO:0006024	glycosaminoglycan biosynthetic process	7	41	0.170732	0.126075	0.923609	1	1	EXT1_HUMAN	GALT5_HUMAN	H6ST2_HUMAN	HS3S2_HUMAN	E9PF17_HUMAN	H0YMF1_HUMAN	A0A5K1VW97_HUMAN
biological_process	GO:0030193	regulation of blood coagulation	7	16	0.4375	0.894572	0.162941	1	1	A0A7I2V2D2_HUMAN	A0A7I2V5R3_HUMAN	H9KV48_HUMAN	E9PGN7_HUMAN	A0A7I2V2X2_HUMAN	A0A7I2V4I9_HUMAN	A0A087WUD9_HUMAN
biological_process	GO:0048844	artery morphogenesis	7	24	0.291667	0.998607	0.00323176	1	1	EGLN_HUMAN	APOB_HUMAN	ANGL3_HUMAN	PRDM1_HUMAN	LDLR_HUMAN	NF1_HUMAN	ZMIZ1_HUMAN
biological_process	GO:0006978	DNA damage response, signal transduction by p53 class mediator resulting in transcription of p21 class mediator	7	14	0.5	0.990236	0.0338617	1	1	MUC1_HUMAN	FOXM1_HUMAN	BRCA2_HUMAN	P53_HUMAN	CHK2_HUMAN	SP100_HUMAN	HIPK2_HUMAN
biological_process	GO:0016045	detection of bacterium	7	12	0.583333	0.999243	0.00323231	1	1	HLAA_HUMAN	BIRC1_HUMAN	NOD2_HUMAN	PGRP2_HUMAN	NOD1_HUMAN	PGRP4_HUMAN	HLAB_HUMAN
biological_process	GO:2000651	positive regulation of sodium ion transmembrane transporter activity	7	9	0.777778	0.993549	0.0244902	1	1	ANK3_HUMAN	WNK4_HUMAN	WNK2_HUMAN	WNK3_HUMAN	WNK1_HUMAN	DMD_HUMAN	A0A075B6G3_HUMAN
biological_process	GO:0032331	negative regulation of chondrocyte differentiation	7	21	0.333333	0.953574	0.113731	1	1	CTNB1_HUMAN	GREM1_HUMAN	ATS7_HUMAN	LTBP3_HUMAN	ATS12_HUMAN	FBLN3_HUMAN	A0A7I2PJA1_HUMAN
biological_process	GO:0032786	positive regulation of DNA-templated transcription, elongation	7	18	0.388889	0.993073	0.0184895	1	1	ERCC6_HUMAN	ELL_HUMAN	KAT7_HUMAN	SCAF8_HUMAN	SPT5H_HUMAN	CCNK_HUMAN	CCNT1_HUMAN
biological_process	GO:0031848	protection from non-homologous end joining at telomere	7	13	0.538462	0.999225	0.0040641	1	1	DCR1B_HUMAN	TFP11_HUMAN	TE2IP_HUMAN	TERF2_HUMAN	DCR1C_HUMAN	DCR1A_HUMAN	U3KQ35_HUMAN
biological_process	GO:0008612	peptidyl-lysine modification to peptidyl-hypusine	7	15	0.466667	0.99758	0.0113756	1	1	DHYS_HUMAN	M0R253_HUMAN	M0QX43_HUMAN	A0A3B3IU31_HUMAN	Q5J8M5_HUMAN	B4E3M2_HUMAN	A0A087WZK0_HUMAN
biological_process	GO:0080111	DNA demethylation	7	23	0.304348	0.787067	0.332708	1	1	TET1_HUMAN	TET2_HUMAN	TET3_HUMAN	ALKB1_HUMAN	E7EQS8_HUMAN	E7EPB1_HUMAN	A0A5H1ZRP3_HUMAN
biological_process	GO:1900364	negative regulation of mRNA polyadenylation	7	20	0.35	0.980091	0.0590294	1	1	BRE1A_HUMAN	SPT5H_HUMAN	ZC3HE_HUMAN	CCNT1_HUMAN	H0YJA2_HUMAN	G3V411_HUMAN	G3V256_HUMAN
biological_process	GO:0043631	RNA polyadenylation	7	16	0.4375	0.99643	0.00723852	1	1	PAPOA_HUMAN	PNPT1_HUMAN	G3V457_HUMAN	G3XAH6_HUMAN	A0A7N4YH79_HUMAN	G3V3I9_HUMAN	A0A0C4DGK1_HUMAN
biological_process	GO:0042471	ear morphogenesis	7	14	0.5	0.991372	0.0145422	1	1	NIPBL_HUMAN	F8WB53_HUMAN	A0A2R8Y6K4_HUMAN	A0A2R8YGM9_HUMAN	E7EQM5_HUMAN	A0A2R8YET7_HUMAN	A6NCB9_HUMAN
biological_process	GO:0018094	protein polyglycylation	7	25	0.28	0.926966	0.160979	1	1	TTL10_HUMAN	TTLL3_HUMAN	H3BLT7_HUMAN	H0Y5E3_HUMAN	J3KQB2_HUMAN	C9JSD3_HUMAN	A0A0A6YYG9_HUMAN
biological_process	GO:0030889	negative regulation of B cell proliferation	6	18	0.333333	0.966138	0.096342	1	1	MNDA_HUMAN	SHIP1_HUMAN	RC3H1_HUMAN	BTK_HUMAN	ATM_HUMAN	CLM8_HUMAN
biological_process	GO:0034198	cellular response to amino acid starvation	6	49	0.122449	0.256194	0.851825	1	1	DEPD5_HUMAN	RN152_HUMAN	SESN3_HUMAN	SZT2_HUMAN	E2AK4_HUMAN	GCN1_HUMAN
biological_process	GO:0000380	alternative mRNA splicing, via spliceosome	6	28	0.214286	0.717346	0.371307	1	1	DDX17_HUMAN	DHX9_HUMAN	SPF45_HUMAN	SFSWA_HUMAN	CDK13_HUMAN	DDX5_HUMAN
biological_process	GO:0033169	histone H3-K9 demethylation	6	13	0.461538	0.995729	0.0202007	1	1	JHD2C_HUMAN	KDM3B_HUMAN	KDM4D_HUMAN	HAIR_HUMAN	KDM4B_HUMAN	KDM4E_HUMAN
biological_process	GO:1902166	negative regulation of intrinsic apoptotic signaling pathway in response to DNA damage by p53 class mediator	6	16	0.375	0.982938	0.0575064	1	1	TAF9B_HUMAN	MARH7_HUMAN	MUC1_HUMAN	BCL2_HUMAN	ATAD5_HUMAN	ING2_HUMAN
biological_process	GO:0043923	positive regulation by host of viral transcription	6	17	0.352941	0.97551	0.0755153	1	1	SNW1_HUMAN	CTDP1_HUMAN	EP300_HUMAN	SP1_HUMAN	CCNT1_HUMAN	CHD1_HUMAN
biological_process	GO:0050909	sensory perception of taste	6	33	0.181818	0.236239	0.846315	1	1	P2RX2_HUMAN	T2R41_HUMAN	TRPM5_HUMAN	E9PRW0_HUMAN	A0A0C4DGF4_HUMAN	E9PQF7_HUMAN
biological_process	GO:0035987	endodermal cell differentiation	6	28	0.214286	0.993935	0.0147265	1	1	LAMA3_HUMAN	LAMB1_HUMAN	FINC_HUMAN	LAMB3_HUMAN	SETD2_HUMAN	CO7A1_HUMAN
biological_process	GO:0099560	synaptic membrane adhesion	6	24	0.25	0.892767	0.215497	1	1	PTPRD_HUMAN	LRFN5_HUMAN	NRG1_HUMAN	SPRL1_HUMAN	SLIK2_HUMAN	SLIK3_HUMAN
biological_process	GO:0050901	leukocyte tethering or rolling	6	20	0.3	0.862379	0.250333	1	1	PDXL2_HUMAN	EXT1_HUMAN	SELPL_HUMAN	ROCK1_HUMAN	MADCA_HUMAN	ADDB_HUMAN
biological_process	GO:0071364	cellular response to epidermal growth factor stimulus	6	44	0.136364	0.277543	0.843649	1	1	PAX2_HUMAN	PTN12_HUMAN	MED1_HUMAN	STA5B_HUMAN	DAB2_HUMAN	BAIP2_HUMAN
biological_process	GO:0034122	negative regulation of toll-like receptor signaling pathway	6	17	0.352941	0.971886	0.0605201	1	1	LRC14_HUMAN	IRAK3_HUMAN	CATIN_HUMAN	GPS2_HUMAN	OTUD4_HUMAN	TLR9_HUMAN
biological_process	GO:0030282	bone mineralization	6	49	0.122449	0.159542	0.890864	1	1	KLF10_HUMAN	TETN_HUMAN	ZBT40_HUMAN	CER1_HUMAN	CO1A2_HUMAN	X6RAN8_HUMAN
biological_process	GO:0030278	regulation of ossification	6	15	0.4	0.634625	0.452015	1	1	PE2R4_HUMAN	PBX1_HUMAN	RUNX2_HUMAN	INTU_HUMAN	EGR2_HUMAN	ACVR1_HUMAN
biological_process	GO:0046325	negative regulation of glucose import	6	15	0.4	0.988624	0.0423399	1	1	GRB10_HUMAN	ENPP1_HUMAN	SIR6_HUMAN	STXB3_HUMAN	ACE_HUMAN	DP13B_HUMAN
biological_process	GO:0048661	positive regulation of smooth muscle cell proliferation	6	57	0.105263	0.0407497	0.980612	1	1	PK3CA_HUMAN	ITA2_HUMAN	ZN143_HUMAN	X3CL1_HUMAN	IL6RA_HUMAN	IRAK1_HUMAN
biological_process	GO:0030099	myeloid cell differentiation	6	21	0.285714	0.917895	0.102818	1	1	KAT6A_HUMAN	IRF8_HUMAN	PML_HUMAN	NCOA6_HUMAN	TET2_HUMAN	IF16_HUMAN
biological_process	GO:0045840	positive regulation of mitotic nuclear division	6	29	0.206897	0.890378	0.19184	1	1	LRP5_HUMAN	AURKA_HUMAN	INSR_HUMAN	EGF_HUMAN	NUSAP_HUMAN	NUP62_HUMAN
biological_process	GO:0006091	generation of precursor metabolites and energy	6	47	0.12766	4.27713e-15	1	0	1	KPB1_HUMAN	DHTK1_HUMAN	ENPP1_HUMAN	KPBB_HUMAN	XYLB_HUMAN	TREX1_HUMAN
biological_process	GO:0001541	ovarian follicle development	6	42	0.142857	0.219553	0.872213	1	1	BCL2_HUMAN	TAF4_HUMAN	ATM_HUMAN	B2CL1_HUMAN	EI2BD_HUMAN	CTNA1_HUMAN
biological_process	GO:0048565	digestive tract development	6	28	0.214286	0.985284	0.0243465	1	1	COBL_HUMAN	CLMP_HUMAN	NIPBL_HUMAN	PKD1_HUMAN	CHD8_HUMAN	MYCD_HUMAN
biological_process	GO:0045070	positive regulation of viral genome replication	6	30	0.2	0.628257	0.549644	1	1	LARP1_HUMAN	DSRAD_HUMAN	NOTC1_HUMAN	PABP1_HUMAN	SRPK1_HUMAN	STAU1_HUMAN
biological_process	GO:0030224	monocyte differentiation	6	17	0.352941	0.946571	0.110262	1	1	PDE2A_HUMAN	SP3_HUMAN	MED1_HUMAN	FAS_HUMAN	MYH9_HUMAN	IF16_HUMAN
biological_process	GO:1901998	toxin transport	6	37	0.162162	0.467597	0.697773	1	1	BNIP3_HUMAN	COPB2_HUMAN	TCPH_HUMAN	ANTRL_HUMAN	CRTC2_HUMAN	A0A087WXL6_HUMAN
biological_process	GO:0007193	adenylate cyclase-inhibiting G protein-coupled receptor signaling pathway	6	55	0.109091	0.0509253	0.976128	1	1	PDE2A_HUMAN	GPR37_HUMAN	A4_HUMAN	AKA12_HUMAN	ADCY5_HUMAN	5HT1E_HUMAN
biological_process	GO:0043116	negative regulation of vascular permeability	6	16	0.375	0.994391	0.0199093	1	1	PDE2A_HUMAN	ANGP1_HUMAN	CEAM1_HUMAN	AKA12_HUMAN	AMOT_HUMAN	A0A087X0K9_HUMAN
biological_process	GO:0010821	regulation of mitochondrion organization	6	20	0.3	0.84312	0.206399	1	1	PDE2A_HUMAN	MIRO1_HUMAN	EP300_HUMAN	STOX1_HUMAN	SQSTM_HUMAN	AT132_HUMAN
biological_process	GO:2000379	positive regulation of reactive oxygen species metabolic process	6	32	0.1875	0.468447	0.652823	1	1	NF2L2_HUMAN	DCXR_HUMAN	P53_HUMAN	RIPK1_HUMAN	XDH_HUMAN	ZC12A_HUMAN
biological_process	GO:0006198	cAMP catabolic process	6	24	0.25	0.863645	0.270403	1	1	PDE4B_HUMAN	PDE4D_HUMAN	PDE8B_HUMAN	A0A087WSZ7_HUMAN	A0A1B0GW84_HUMAN	A0A2R8Y4E6_HUMAN
biological_process	GO:0033137	negative regulation of peptidyl-serine phosphorylation	6	27	0.222222	0.692936	0.482014	1	1	PDE4D_HUMAN	DDIT4_HUMAN	HGF_HUMAN	SAC2_HUMAN	DMD_HUMAN	A0A075B6G3_HUMAN
biological_process	GO:0007339	binding of sperm to zona pellucida	6	45	0.133333	0.299292	0.821013	1	1	ZP2_HUMAN	TCPH_HUMAN	UBP2L_HUMAN	FETUB_HUMAN	ADA18_HUMAN	ADA32_HUMAN
biological_process	GO:0002091	negative regulation of receptor internalization	6	14	0.428571	0.995936	0.0170623	1	1	LRRT2_HUMAN	AN13B_HUMAN	RIN3_HUMAN	DLG4_HUMAN	AN13A_HUMAN	ATX2_HUMAN
biological_process	GO:0051781	positive regulation of cell division	6	77	0.0779221	0.99666	0.00568311	1	1	MACC1_HUMAN	SIR2_HUMAN	TGFB2_HUMAN	VEGFB_HUMAN	ZNF16_HUMAN	CSPP1_HUMAN
biological_process	GO:0031954	positive regulation of protein autophosphorylation	6	24	0.25	0.982594	0.0463305	1	1	MRE11_HUMAN	TB182_HUMAN	TAOK2_HUMAN	RAD50_HUMAN	NBN_HUMAN	NEK10_HUMAN
biological_process	GO:0002548	monocyte chemotaxis	6	43	0.139535	0.0758867	0.962571	1	1	CCL21_HUMAN	CCR2_HUMAN	TNR11_HUMAN	PTPRO_HUMAN	X3CL1_HUMAN	IL6RA_HUMAN
biological_process	GO:0045737	positive regulation of cyclin-dependent protein serine/threonine kinase activity	6	20	0.3	0.940971	0.145963	1	1	CDN1B_HUMAN	PKD1_HUMAN	PKD2_HUMAN	PSRC1_HUMAN	CDC6_HUMAN	CCND3_HUMAN
biological_process	GO:0061098	positive regulation of protein tyrosine kinase activity	6	30	0.2	0.495661	0.653188	1	1	SRCN1_HUMAN	RELN_HUMAN	ACE_HUMAN	DLG4_HUMAN	CASS4_HUMAN	A4_HUMAN
biological_process	GO:0072593	reactive oxygen species metabolic process	6	35	0.171429	0.599005	0.466322	1	1	PAX2_HUMAN	DDIT4_HUMAN	BCL2_HUMAN	BNIP3_HUMAN	VAV_HUMAN	NNTM_HUMAN
biological_process	GO:0034375	high-density lipoprotein particle remodeling	6	17	0.352941	0.97551	0.0755153	1	1	APOA1_HUMAN	APOA2_HUMAN	ABCA5_HUMAN	LIPE_HUMAN	LIPC_HUMAN	APOA4_HUMAN
biological_process	GO:0015914	phospholipid transport	6	37	0.162162	0.841661	0.21429	1	1	OSBL8_HUMAN	PITM1_HUMAN	LDLR_HUMAN	A0A0A0MR22_HUMAN	H0YMP8_HUMAN	A0A2R8YDI5_HUMAN
biological_process	GO:0010875	positive regulation of cholesterol efflux	6	26	0.230769	0.812571	0.340217	1	1	LRP1_HUMAN	APOA1_HUMAN	GPS2_HUMAN	NR1H2_HUMAN	PTC1_HUMAN	ABCAC_HUMAN
biological_process	GO:0002088	lens development in camera-type eye	6	42	0.142857	0.822055	0.2549	1	1	FAT1_HUMAN	BROMI_HUMAN	MED1_HUMAN	PAX6_HUMAN	WNT2_HUMAN	NHS_HUMAN
biological_process	GO:1902287	semaphorin-plexin signaling pathway involved in axon guidance	6	15	0.4	0.988624	0.0423399	1	1	PLXA3_HUMAN	PLXA4_HUMAN	PLXB1_HUMAN	PLXB2_HUMAN	PLXB3_HUMAN	PLXD1_HUMAN
biological_process	GO:0019915	lipid storage	6	33	0.181818	0.458177	0.644192	1	1	PLIN2_HUMAN	CRY1_HUMAN	APOA1_HUMAN	ANGL3_HUMAN	NRIP1_HUMAN	STA5B_HUMAN
biological_process	GO:1900745	positive regulation of p38MAPK cascade	6	32	0.1875	0.628257	0.549644	1	1	PJA2_HUMAN	STK39_HUMAN	M3K3_HUMAN	NCF1_HUMAN	XDH_HUMAN	ZC12A_HUMAN
biological_process	GO:0090050	positive regulation of cell migration involved in sprouting angiogenesis	6	21	0.285714	0.925003	0.174349	1	1	HDAC9_HUMAN	M3K3_HUMAN	JCAD_HUMAN	P3C2A_HUMAN	FGFP1_HUMAN	ABL1_HUMAN
biological_process	GO:0060707	trophoblast giant cell differentiation	6	15	0.4	0.988624	0.0423399	1	1	PLK4_HUMAN	SENP2_HUMAN	COT2_HUMAN	E2F7_HUMAN	PRDM1_HUMAN	E2F8_HUMAN
biological_process	GO:0016242	negative regulation of macroautophagy	6	15	0.4	0.98151	0.044195	1	1	PK3CA_HUMAN	SMCR8_HUMAN	SMG1_HUMAN	UBP36_HUMAN	TSC1_HUMAN	LZTS1_HUMAN
biological_process	GO:0032008	positive regulation of TOR signaling	6	45	0.133333	0.23779	0.855184	1	1	PK3CA_HUMAN	SMCR8_HUMAN	LTOR1_HUMAN	XBP1_HUMAN	RELN_HUMAN	F5GX19_HUMAN
biological_process	GO:0014823	response to activity	6	45	0.133333	0.491068	0.632034	1	1	PK3CA_HUMAN	CRY1_HUMAN	ANGP2_HUMAN	SMTL1_HUMAN	ZEB1_HUMAN	F6TDF5_HUMAN
biological_process	GO:0090399	replicative senescence	6	16	0.375	0.982938	0.0575064	1	1	CHK1_HUMAN	ATR_HUMAN	P53_HUMAN	CHK2_HUMAN	WRN_HUMAN	ATM_HUMAN
biological_process	GO:0045071	negative regulation of viral genome replication	6	45	0.133333	0.518163	0.617857	1	1	OAS3_HUMAN	SRPK1_HUMAN	ZCCHV_HUMAN	IF16_HUMAN	N4BP1_HUMAN	ISG15_HUMAN
biological_process	GO:0006541	glutamine metabolic process	6	41	0.146341	0.196173	0.897324	1	1	PYR1_HUMAN	CPSM_HUMAN	GFPT1_HUMAN	ASND1_HUMAN	A8K0A6_HUMAN	F8VPD4_HUMAN
biological_process	GO:1904888	cranial skeletal system development	6	12	0.5	0.991548	0.0171184	1	1	RIC1_HUMAN	CEP55_HUMAN	CTNB1_HUMAN	EXT1_HUMAN	TGFB2_HUMAN	P63_HUMAN
biological_process	GO:0006796	phosphate-containing compound metabolic process	6	27	0.222222	0.0356346	0.967849	1	1	S17A4_HUMAN	PTPRD_HUMAN	ENPP1_HUMAN	ENPP3_HUMAN	SHIP1_HUMAN	NPT3_HUMAN
biological_process	GO:0090102	cochlea development	6	31	0.193548	0.941078	0.107122	1	1	PAX2_HUMAN	KCNQ1_HUMAN	FTM_HUMAN	S26A5_HUMAN	NTRK3_HUMAN	A0A0R4J2E1_HUMAN
biological_process	GO:0045830	positive regulation of isotype switching	6	13	0.461538	0.992155	0.0227172	1	1	SHLD2_HUMAN	TP53B_HUMAN	PAXI1_HUMAN	HMCES_HUMAN	RIF1_HUMAN	SHLD1_HUMAN
biological_process	GO:0031640	killing of cells of another organism	6	68	0.0882353	0.064422	0.964701	1	1	SEMG1_HUMAN	KNG1_HUMAN	CCL21_HUMAN	GNLY_HUMAN	CMGA_HUMAN	PGRP4_HUMAN
biological_process	GO:0030502	negative regulation of bone mineralization	6	16	0.375	0.954663	0.119883	1	1	HIF1A_HUMAN	ENPP1_HUMAN	GREM1_HUMAN	LTBP3_HUMAN	BCOR_HUMAN	ECM1_HUMAN
biological_process	GO:0042594	response to starvation	6	35	0.171429	0.789782	0.264945	1	1	FOXK1_HUMAN	SSR3_HUMAN	PRGC1_HUMAN	PUR8_HUMAN	FOXO3_HUMAN	CPSM_HUMAN
biological_process	GO:0030534	adult behavior	6	32	0.1875	0.968073	0.0491916	1	1	SHAN1_HUMAN	ALK_HUMAN	BBS4_HUMAN	CNTP2_HUMAN	SPTN2_HUMAN	RN180_HUMAN
biological_process	GO:1902600	proton transmembrane transport	6	74	0.0810811	0.000122092	0.999963	0.144	1	VATG2_HUMAN	VATH_HUMAN	VAS1L_HUMAN	NNTM_HUMAN	A0A590UJI3_HUMAN	E9PCX7_HUMAN
biological_process	GO:0001954	positive regulation of cell-matrix adhesion	6	27	0.222222	0.911982	0.150194	1	1	UTRN_HUMAN	CCL21_HUMAN	PLAK_HUMAN	PKHA2_HUMAN	X3CL1_HUMAN	A0A075B6G3_HUMAN
biological_process	GO:0043537	negative regulation of blood vessel endothelial cell migration	6	21	0.285714	0.692255	0.469366	1	1	ACVL1_HUMAN	ANGP4_HUMAN	ANGP2_HUMAN	MEF2C_HUMAN	PLAK_HUMAN	AT2B4_HUMAN
biological_process	GO:0045879	negative regulation of smoothened signaling pathway	6	27	0.222222	0.919891	0.158325	1	1	RUNX2_HUMAN	MEGF8_HUMAN	PTC2_HUMAN	PTC1_HUMAN	GLI3_HUMAN	A0A7I2PJA1_HUMAN
biological_process	GO:0031573	mitotic intra-S DNA damage checkpoint signaling	6	17	0.352941	0.97551	0.0755153	1	1	MRE11_HUMAN	FACD2_HUMAN	CHK2_HUMAN	MDC1_HUMAN	RAD17_HUMAN	ATF2_HUMAN
biological_process	GO:0030318	melanocyte differentiation	6	21	0.285714	0.910812	0.187429	1	1	BCL2_HUMAN	ENPP1_HUMAN	MEF2C_HUMAN	MITF_HUMAN	P_HUMAN	GLI3_HUMAN
biological_process	GO:0030049	muscle filament sliding	6	37	0.162162	0.379336	0.769142	1	1	MYH4_HUMAN	MYH2_HUMAN	MYH3_HUMAN	MYH6_HUMAN	MYH7_HUMAN	MYH8_HUMAN
biological_process	GO:0046677	response to antibiotic	6	31	0.193548	0.841807	0.257751	1	1	P53_HUMAN	SKIL_HUMAN	MDM2_HUMAN	ZC3H8_HUMAN	AOC3_HUMAN	C2TA_HUMAN
biological_process	GO:0009408	response to heat	6	48	0.125	0.510257	0.584925	1	1	NOS3_HUMAN	TRPM2_HUMAN	ASIC3_HUMAN	CRNN_HUMAN	DNJA3_HUMAN	EI2BD_HUMAN
biological_process	GO:0006099	tricarboxylic acid cycle	6	95	0.0631579	0.000650129	0.99982	0.581	1	DHTK1_HUMAN	FUMH_HUMAN	SUCB2_HUMAN	NNTM_HUMAN	E9PDQ8_HUMAN	C9JWN1_HUMAN
biological_process	GO:0046626	regulation of insulin receptor signaling pathway	6	13	0.461538	0.914091	0.142245	1	1	P85A_HUMAN	SIK2_HUMAN	SESN3_HUMAN	VWA2_HUMAN	TSC2_HUMAN	CCND3_HUMAN
biological_process	GO:0030325	adrenal gland development	6	23	0.26087	0.784503	0.375851	1	1	PBX1_HUMAN	SALL1_HUMAN	INSR_HUMAN	APOA1_HUMAN	NF1_HUMAN	WT1_HUMAN
biological_process	GO:0032963	collagen metabolic process	6	16	0.375	0.628693	0.468622	1	1	P3H3_HUMAN	TNS2_HUMAN	HIF1A_HUMAN	TENX_HUMAN	VP33B_HUMAN	CO1A2_HUMAN
biological_process	GO:0015721	bile acid and bile salt transport	6	38	0.157895	0.664786	0.488127	1	1	MRP2_HUMAN	SO1A2_HUMAN	ABCBB_HUMAN	CEAM1_HUMAN	MRP4_HUMAN	A0A0A0MQU7_HUMAN
biological_process	GO:0016339	calcium-dependent cell-cell adhesion via plasma membrane cell adhesion molecules	6	49	0.122449	0.148175	0.926426	1	1	CADH7_HUMAN	PCDB5_HUMAN	PCDBG_HUMAN	PCDGG_HUMAN	PCDBD_HUMAN	AT2C1_HUMAN
biological_process	GO:0035278	miRNA-mediated gene silencing by inhibition of translation	6	19	0.315789	0.978298	0.0587872	1	1	TNR6B_HUMAN	TNR6A_HUMAN	A0A1B0GU24_HUMAN	H0Y720_HUMAN	H7C269_HUMAN	H3BTQ1_HUMAN
biological_process	GO:0031623	receptor internalization	6	46	0.130435	0.842333	0.218165	1	1	LRP1_HUMAN	AP2M1_HUMAN	NEDD4_HUMAN	PICAL_HUMAN	LIRB1_HUMAN	GRIA1_HUMAN
biological_process	GO:0045055	regulated exocytosis	6	19	0.315789	0.756641	0.293542	1	1	CRHBP_HUMAN	RFIP5_HUMAN	SNG1_HUMAN	RIMS1_HUMAN	MYH9_HUMAN	ABCAC_HUMAN
biological_process	GO:0019882	antigen processing and presentation	6	58	0.103448	0.906786	0.117475	1	1	CD8A_HUMAN	EXT1_HUMAN	CD209_HUMAN	RAB32_HUMAN	WDFY4_HUMAN	CLC4M_HUMAN
biological_process	GO:0048169	regulation of long-term neuronal synaptic plasticity	6	18	0.333333	0.839021	0.304958	1	1	NETO1_HUMAN	NF1_HUMAN	SYGP1_HUMAN	SNG1_HUMAN	DLG4_HUMAN	A4_HUMAN
biological_process	GO:0035025	positive regulation of Rho protein signal transduction	6	34	0.176471	0.562958	0.612957	1	1	MCF2L_HUMAN	APOA1_HUMAN	ROBO1_HUMAN	PRAG1_HUMAN	AGRG1_HUMAN	AKP13_HUMAN
biological_process	GO:0031507	heterochromatin assembly	6	50	0.12	0.9282	0.111866	1	1	HYPM_HUMAN	EZH1_HUMAN	KMT2D_HUMAN	SIR2_HUMAN	MO4L2_HUMAN	H2AW_HUMAN
biological_process	GO:0045672	positive regulation of osteoclast differentiation	6	21	0.285714	0.863645	0.270403	1	1	KLF10_HUMAN	PRGC2_HUMAN	CREB1_HUMAN	OCSTP_HUMAN	IL23A_HUMAN	IFNG_HUMAN
biological_process	GO:0048489	synaptic vesicle transport	6	16	0.375	0.664786	0.488127	1	1	SYNJ1_HUMAN	KIF5C_HUMAN	KIF5A_HUMAN	KINH_HUMAN	CTNB1_HUMAN	SPTCS_HUMAN
biological_process	GO:0030520	intracellular estrogen receptor signaling pathway	6	20	0.3	0.995001	0.0114126	1	1	ARI1A_HUMAN	DDX17_HUMAN	ESR2_HUMAN	PRGC2_HUMAN	RFOX2_HUMAN	DDX5_HUMAN
biological_process	GO:0051457	maintenance of protein location in nucleus	6	14	0.428571	0.998788	0.00478661	1	1	TAF8_HUMAN	TOPRS_HUMAN	BBS4_HUMAN	PML_HUMAN	MORC3_HUMAN	CIZ1_HUMAN
biological_process	GO:0017156	calcium-ion regulated exocytosis	6	31	0.193548	0.763216	0.321982	1	1	SYT3_HUMAN	RIMS2_HUMAN	RHG17_HUMAN	SCIN_HUMAN	RPGF4_HUMAN	RIMS1_HUMAN
biological_process	GO:0042554	superoxide anion generation	6	26	0.230769	0.640868	0.504339	1	1	NCF1C_HUMAN	NCF1_HUMAN	NCF1B_HUMAN	NCF2_HUMAN	DUOX2_HUMAN	CY24B_HUMAN
biological_process	GO:0048791	calcium ion-regulated exocytosis of neurotransmitter	6	16	0.375	0.995213	0.0161405	1	1	RIMS2_HUMAN	STX1B_HUMAN	RIMS1_HUMAN	F8W6W8_HUMAN	A0A0J9YWD4_HUMAN	A0A590UJL1_HUMAN
biological_process	GO:0050806	positive regulation of synaptic transmission	6	17	0.352941	0.556254	0.527124	1	1	LGI1_HUMAN	NMU_HUMAN	RIMS2_HUMAN	RIMS1_HUMAN	DLG4_HUMAN	CSTN1_HUMAN
biological_process	GO:0048278	vesicle docking	6	25	0.24	0.857755	0.220804	1	1	STX17_HUMAN	STX6_HUMAN	STX16_HUMAN	STX1B_HUMAN	STX4_HUMAN	TSNA1_HUMAN
biological_process	GO:0006939	smooth muscle contraction	6	18	0.333333	0.580792	0.515282	1	1	MYLK_HUMAN	ROCK2_HUMAN	APBB1_HUMAN	ROCK1_HUMAN	MYH11_HUMAN	E9PF63_HUMAN
biological_process	GO:0010812	negative regulation of cell-substrate adhesion	6	16	0.375	0.918072	0.138881	1	1	NOTC1_HUMAN	ANGP2_HUMAN	MEN1_HUMAN	TBCD_HUMAN	PTPRO_HUMAN	X3CL1_HUMAN
biological_process	GO:0006953	acute-phase response	6	55	0.109091	0.0465411	0.979444	1	1	FINC_HUMAN	FA8_HUMAN	TFR2_HUMAN	A2MG_HUMAN	IL6RA_HUMAN	H0Y7Z1_HUMAN
biological_process	GO:0045109	intermediate filament organization	6	21	0.285714	0.942484	0.127119	1	1	EPIPL_HUMAN	BFSP2_HUMAN	K1C17_HUMAN	K1C9_HUMAN	TRHY_HUMAN	DESP_HUMAN
biological_process	GO:0048714	positive regulation of oligodendrocyte differentiation	6	23	0.26087	0.886269	0.236891	1	1	PTPRZ_HUMAN	TNR1B_HUMAN	TEN4_HUMAN	ZN488_HUMAN	GSX2_HUMAN	ANM5_HUMAN
biological_process	GO:0048745	smooth muscle tissue development	6	13	0.461538	0.995213	0.0161405	1	1	EGLN_HUMAN	NF1_HUMAN	PARPT_HUMAN	ZFAN5_HUMAN	PTC1_HUMAN	AP2B_HUMAN
biological_process	GO:2000114	regulation of establishment of cell polarity	6	21	0.285714	0.926966	0.160979	1	1	ROCK2_HUMAN	KANK1_HUMAN	BIG1_HUMAN	PKHG3_HUMAN	ROCK1_HUMAN	KI20B_HUMAN
biological_process	GO:0000712	resolution of meiotic recombination intermediates	6	19	0.315789	0.954663	0.119883	1	1	SHOC1_HUMAN	SLX4_HUMAN	HFM1_HUMAN	FANCM_HUMAN	RMI1_HUMAN	A6PVK7_HUMAN
biological_process	GO:0032204	regulation of telomere maintenance	6	13	0.461538	0.99866	0.00281841	1	1	SMG1_HUMAN	RENT1_HUMAN	LMNA_HUMAN	TE2IP_HUMAN	TERF2_HUMAN	YLPM1_HUMAN
biological_process	GO:0032870	cellular response to hormone stimulus	6	27	0.222222	0.981056	0.024204	1	1	ROBO2_HUMAN	FOSB_HUMAN	NCOA3_HUMAN	NCOA2_HUMAN	STA5B_HUMAN	NCOA1_HUMAN
biological_process	GO:0048701	embryonic cranial skeleton morphogenesis	6	32	0.1875	0.922532	0.140925	1	1	RUNX2_HUMAN	GRHL2_HUMAN	DLX2_HUMAN	SIX4_HUMAN	SETD2_HUMAN	TBX15_HUMAN
biological_process	GO:0045429	positive regulation of nitric oxide biosynthetic process	6	46	0.130435	0.234289	0.872841	1	1	INSR_HUMAN	PKD2_HUMAN	IFNG_HUMAN	A4_HUMAN	CLC7A_HUMAN	CAPON_HUMAN
biological_process	GO:0021591	ventricular system development	6	17	0.352941	0.986022	0.0366721	1	1	TT21B_HUMAN	BBS4_HUMAN	KIF27_HUMAN	CENPF_HUMAN	HYDIN_HUMAN	CELR2_HUMAN
biological_process	GO:0045859	regulation of protein kinase activity	6	18	0.333333	0.9587	0.0510253	1	1	SMG8_HUMAN	TITIN_HUMAN	CCYL3_HUMAN	TSC1_HUMAN	KKCC2_HUMAN	CCYL2_HUMAN
biological_process	GO:0036342	post-anal tail morphogenesis	6	18	0.333333	0.966138	0.096342	1	1	FZD3_HUMAN	PALB2_HUMAN	P63_HUMAN	MED12_HUMAN	CHSTB_HUMAN	J3KP65_HUMAN
biological_process	GO:0042176	regulation of protein catabolic process	6	31	0.193548	0.983277	0.0224175	1	1	HGS_HUMAN	CHMP6_HUMAN	FA83D_HUMAN	FAF1_HUMAN	CHK2_HUMAN	MDM2_HUMAN
biological_process	GO:0006369	termination of RNA polymerase II transcription	6	17	0.352941	0.990236	0.0338617	1	1	MAZ_HUMAN	PCF11_HUMAN	SETX_HUMAN	SCAF8_HUMAN	TTF2_HUMAN	E9PNY7_HUMAN
biological_process	GO:0050908	detection of light stimulus involved in visual perception	6	21	0.285714	0.925003	0.174349	1	1	CCD66_HUMAN	CAC1F_HUMAN	EYS_HUMAN	GUC2F_HUMAN	CP250_HUMAN	CA2D4_HUMAN
biological_process	GO:0035845	photoreceptor cell outer segment organization	6	14	0.428571	0.992804	0.0299542	1	1	TOPRS_HUMAN	BBS4_HUMAN	PCARE_HUMAN	NPHP4_HUMAN	RP1_HUMAN	AHI1_HUMAN
biological_process	GO:0051603	proteolysis involved in cellular protein catabolic process	6	31	0.193548	0.88521	0.130662	1	1	PSA6_HUMAN	MALT1_HUMAN	CATF_HUMAN	ATS7_HUMAN	MDM2_HUMAN	ATS12_HUMAN
biological_process	GO:0043968	histone H2A acetylation	6	28	0.214286	0.724437	0.447024	1	1	TRRAP_HUMAN	ING3_HUMAN	EP400_HUMAN	EPC1_HUMAN	BRD8_HUMAN	MO4L2_HUMAN
biological_process	GO:0072711	cellular response to hydroxyurea	6	12	0.5	0.997659	0.0128484	1	1	DDI2_HUMAN	DDI1_HUMAN	TREX1_HUMAN	TIM_HUMAN	NSE3_HUMAN	DDX11_HUMAN
biological_process	GO:0001958	endochondral ossification	6	29	0.206897	0.724437	0.447024	1	1	RUNX2_HUMAN	EXT1_HUMAN	MEF2C_HUMAN	SHIP2_HUMAN	DLX5_HUMAN	MEF2D_HUMAN
biological_process	GO:0070269	pyroptosis	6	23	0.26087	0.886269	0.236891	1	1	NLRP1_HUMAN	DHX9_HUMAN	BIRC1_HUMAN	GSDMB_HUMAN	GSDMD_HUMAN	NLRP9_HUMAN
biological_process	GO:0045663	positive regulation of myoblast differentiation	6	29	0.206897	0.724437	0.447024	1	1	MEF2C_HUMAN	BTG1_HUMAN	RNB3L_HUMAN	CDON_HUMAN	ZFHX3_HUMAN	IBP3_HUMAN
biological_process	GO:1904262	negative regulation of TORC1 signaling	6	20	0.3	0.940971	0.145963	1	1	DEPD5_HUMAN	RN152_HUMAN	SESN3_HUMAN	SZT2_HUMAN	ATM_HUMAN	K7EMG3_HUMAN
biological_process	GO:0090309	positive regulation of DNA methylation-dependent heterochromatin assembly	6	12	0.5	0.997659	0.0128484	1	1	MCAF1_HUMAN	MORC2_HUMAN	PPHLN_HUMAN	RESF1_HUMAN	SETB1_HUMAN	TASOR_HUMAN
biological_process	GO:0014850	response to muscle activity	6	21	0.285714	0.863645	0.270403	1	1	TNS2_HUMAN	HIF1A_HUMAN	ITA2_HUMAN	PERM1_HUMAN	PRGC1_HUMAN	PUR8_HUMAN
biological_process	GO:0006614	SRP-dependent cotranslational protein targeting to membrane	6	32	0.1875	0.352049	0.789917	1	1	SRP54_HUMAN	SRP72_HUMAN	G3V480_HUMAN	A0A7P0PJI2_HUMAN	A0A7I2V5K0_HUMAN	G3V4F7_HUMAN
biological_process	GO:0019216	regulation of lipid metabolic process	6	40	0.15	0.348852	0.701177	1	1	BBS4_HUMAN	GPS2_HUMAN	NR1D2_HUMAN	RN213_HUMAN	ZFP69_HUMAN	NR1D1_HUMAN
biological_process	GO:0003184	pulmonary valve morphogenesis	6	15	0.4	0.97551	0.0755153	1	1	ROBO2_HUMAN	NOTC1_HUMAN	NOS3_HUMAN	NFAC1_HUMAN	ROBO1_HUMAN	TGFB2_HUMAN
biological_process	GO:0071407	cellular response to organic cyclic compound	6	43	0.139535	0.880893	0.141954	1	1	CDN1B_HUMAN	NOD2_HUMAN	P2Y13_HUMAN	PARPT_HUMAN	STING_HUMAN	A0A7I2PJA1_HUMAN
biological_process	GO:0051145	smooth muscle cell differentiation	6	16	0.375	0.954904	0.0819279	1	1	CTNB1_HUMAN	MEF2C_HUMAN	MRTFA_HUMAN	MRTFB_HUMAN	MYCD_HUMAN	ACVR1_HUMAN
biological_process	GO:0045861	negative regulation of proteolysis	6	21	0.285714	0.700595	0.358041	1	1	KNG1_HUMAN	HDAC6_HUMAN	CYTB_HUMAN	DNJC1_HUMAN	NR1H2_HUMAN	P53_HUMAN
biological_process	GO:0001829	trophectodermal cell differentiation	6	16	0.375	0.940971	0.145963	1	1	SP3_HUMAN	EOMES_HUMAN	SRF_HUMAN	YAP1_HUMAN	CNOT1_HUMAN	CNOT2_HUMAN
biological_process	GO:0031668	cellular response to extracellular stimulus	6	19	0.315789	0.935168	0.0872966	1	1	GSDMD_HUMAN	PTPRC_HUMAN	UFO_HUMAN	TLE5_HUMAN	ADNP_HUMAN	ASGR1_HUMAN
biological_process	GO:0008608	attachment of spindle microtubules to kinetochore	6	18	0.333333	0.932227	0.120559	1	1	ABRX2_HUMAN	KNL1_HUMAN	TEX14_HUMAN	H0YEY7_HUMAN	E9PPJ1_HUMAN	H0YCZ2_HUMAN
biological_process	GO:0071225	cellular response to muramyl dipeptide	6	10	0.6	0.999499	0.00408451	1	1	RIPK2_HUMAN	NOD2_HUMAN	NOD1_HUMAN	PTN22_HUMAN	ARHG2_HUMAN	A0A0B4J1S7_HUMAN
biological_process	GO:0006207	'de novo' pyrimidine nucleobase biosynthetic process	6	13	0.461538	0.995729	0.0202007	1	1	PYRD_HUMAN	PYR1_HUMAN	CPSM_HUMAN	F8VPD4_HUMAN	H7C2E4_HUMAN	I3NI32_HUMAN
biological_process	GO:0009048	dosage compensation by inactivation of X chromosome	6	13	0.461538	0.892767	0.215497	1	1	RENT1_HUMAN	JARD2_HUMAN	BRCA1_HUMAN	SMHD1_HUMAN	LRIF1_HUMAN	RBM15_HUMAN
biological_process	GO:1900006	positive regulation of dendrite development	6	17	0.352941	0.97551	0.0755153	1	1	CRTC1_HUMAN	ALK_HUMAN	COBL_HUMAN	ELAV4_HUMAN	KHDC3_HUMAN	ABL1_HUMAN
biological_process	GO:0006413	translational initiation	6	34	0.176471	0.765659	0.30014	1	1	LARP1_HUMAN	EIF3K_HUMAN	EIF3A_HUMAN	EIF3D_HUMAN	IF4G1_HUMAN	EI2BD_HUMAN
biological_process	GO:0045821	positive regulation of glycolytic process	6	21	0.285714	0.925003	0.174349	1	1	HIF1A_HUMAN	ARNT_HUMAN	INSR_HUMAN	ZBT20_HUMAN	IFNG_HUMAN	A4_HUMAN
biological_process	GO:0045724	positive regulation of cilium assembly	6	17	0.352941	0.995964	0.0130683	1	1	GRDN_HUMAN	BBS4_HUMAN	SAXO1_HUMAN	TAPT1_HUMAN	HD_HUMAN	DZIP1_HUMAN
biological_process	GO:0045930	negative regulation of mitotic cell cycle	6	26	0.230769	0.994668	0.007902	1	1	CDN1B_HUMAN	PML_HUMAN	BTG1_HUMAN	PTN3_HUMAN	ANGE2_HUMAN	ABL1_HUMAN
biological_process	GO:0001702	gastrulation with mouth forming second	6	16	0.375	0.998918	0.00403647	1	1	LRP5_HUMAN	CTNB1_HUMAN	LDB1_HUMAN	TEN4_HUMAN	ACVR1_HUMAN	AMOT_HUMAN
biological_process	GO:0016081	synaptic vesicle docking	6	10	0.6	0.999499	0.00408451	1	1	LIPA3_HUMAN	SNPH_HUMAN	STX1B_HUMAN	UN13A_HUMAN	UN13B_HUMAN	UN13C_HUMAN
biological_process	GO:0035729	cellular response to hepatocyte growth factor stimulus	6	16	0.375	0.990236	0.0338617	1	1	HGF_HUMAN	BCAR1_HUMAN	MED1_HUMAN	CREB1_HUMAN	SIR2_HUMAN	DP13B_HUMAN
biological_process	GO:0051770	positive regulation of nitric-oxide synthase biosynthetic process	6	17	0.352941	0.97551	0.0755153	1	1	JAK3_HUMAN	NOD2_HUMAN	TLR9_HUMAN	IFNG_HUMAN	FCER2_HUMAN	AKA12_HUMAN
biological_process	GO:0048010	vascular endothelial growth factor receptor signaling pathway	6	35	0.171429	0.795673	0.298116	1	1	MAPK2_HUMAN	BCAR1_HUMAN	VAV_HUMAN	VEGFB_HUMAN	XBP1_HUMAN	UFO_HUMAN
biological_process	GO:0071360	cellular response to exogenous dsRNA	6	19	0.315789	0.954663	0.119883	1	1	COL12_HUMAN	DHX9_HUMAN	DDX58_HUMAN	STING_HUMAN	TLR3_HUMAN	A0A0B4J1S1_HUMAN
biological_process	GO:0032481	positive regulation of type I interferon production	6	23	0.26087	0.995972	0.00898415	1	1	STING_HUMAN	PTN22_HUMAN	DHX58_HUMAN	IRAK1_HUMAN	A0A494C0W5_HUMAN	A0A494C1N5_HUMAN
biological_process	GO:0032006	regulation of TOR signaling	6	20	0.3	0.972847	0.0421443	1	1	DDIT4_HUMAN	FA83D_HUMAN	PKHD1_HUMAN	ROS1_HUMAN	RFFL_HUMAN	TELO2_HUMAN
biological_process	GO:0016226	iron-sulfur cluster assembly	6	63	0.0952381	0.0231923	0.991141	1	1	MMS19_HUMAN	XDH_HUMAN	HSC20_HUMAN	CIAO3_HUMAN	H0YHR7_HUMAN	H0Y746_HUMAN
biological_process	GO:0045807	positive regulation of endocytosis	6	22	0.272727	0.886447	0.16725	1	1	LRP1_HUMAN	BIN1_HUMAN	TFR2_HUMAN	DAB2_HUMAN	AP2B1_HUMAN	MIB1_HUMAN
biological_process	GO:0016572	histone phosphorylation	6	14	0.428571	0.372148	0.765711	1	1	M3K12_HUMAN	BAZ1B_HUMAN	INCE_HUMAN	ATM_HUMAN	A0A6Q8PH76_HUMAN	E9PIN0_HUMAN
biological_process	GO:1900034	regulation of cellular response to heat	6	16	0.375	0.990236	0.0338617	1	1	MAPK2_HUMAN	ATR_HUMAN	EP300_HUMAN	ATM_HUMAN	CBP_HUMAN	J3QTA2_HUMAN
biological_process	GO:0050856	regulation of T cell receptor signaling pathway	6	6	1	0.801232	0.303846	1	1	MALT1_HUMAN	RC3H1_HUMAN	CLM8_HUMAN	E9PMT0_HUMAN	A0A0B4J1S7_HUMAN	F5H2S8_HUMAN
biological_process	GO:0051983	regulation of chromosome segregation	6	11	0.545455	0.993819	0.0109429	1	1	CDCA2_HUMAN	BUB1_HUMAN	WAPL_HUMAN	PUM1_HUMAN	KI67_HUMAN	KIF2C_HUMAN
biological_process	GO:0042327	positive regulation of phosphorylation	6	33	0.181818	0.986368	0.0170729	1	1	GRB10_HUMAN	DHX34_HUMAN	PRGC2_HUMAN	EGF_HUMAN	A4_HUMAN	DSCAM_HUMAN
biological_process	GO:0002042	cell migration involved in sprouting angiogenesis	6	21	0.285714	0.892878	0.180282	1	1	GREM1_HUMAN	SRF_HUMAN	ROBO1_HUMAN	TGO1_HUMAN	P55G_HUMAN	PHLD_HUMAN
biological_process	GO:0048333	mesodermal cell differentiation	6	11	0.545455	0.899245	0.196858	1	1	ITB4_HUMAN	KDM6B_HUMAN	ITA3_HUMAN	ITA2_HUMAN	ITB3_HUMAN	A0A087X0R0_HUMAN
biological_process	GO:0032691	negative regulation of interleukin-1 beta production	6	30	0.2	0.692936	0.482014	1	1	APOA1_HUMAN	PML_HUMAN	X3CL1_HUMAN	TNAP3_HUMAN	ZC12A_HUMAN	CAR17_HUMAN
biological_process	GO:0046486	glycerolipid metabolic process	6	20	0.3	0.00627944	0.995313	1	1	DGKQ_HUMAN	E7EM72_HUMAN	E9PFX6_HUMAN	A0A087WV00_HUMAN	H0YA20_HUMAN	E7EWQ4_HUMAN
biological_process	GO:0036158	outer dynein arm assembly	6	26	0.230769	0.812571	0.340217	1	1	DNAI1_HUMAN	ODAD3_HUMAN	DYH17_HUMAN	DYH5_HUMAN	DAAF8_HUMAN	K7EN59_HUMAN
biological_process	GO:1903364	positive regulation of cellular protein catabolic process	6	15	0.4	0.851426	0.198892	1	1	DACT1_HUMAN	FBXL5_HUMAN	FAF1_HUMAN	TNAP3_HUMAN	VPS11_HUMAN	AMER1_HUMAN
biological_process	GO:1902807	negative regulation of cell cycle G1/S phase transition	6	11	0.545455	0.998297	0.00367676	1	1	CDN1B_HUMAN	APC_HUMAN	APBB1_HUMAN	MEN1_HUMAN	SOX2_HUMAN	SUSD2_HUMAN
biological_process	GO:0007096	regulation of exit from mitosis	6	13	0.461538	0.940971	0.145963	1	1	CDN1B_HUMAN	CC14A_HUMAN	KNTC1_HUMAN	SIR2_HUMAN	MD2BP_HUMAN	ANLN_HUMAN
biological_process	GO:0000731	DNA synthesis involved in DNA repair	6	14	0.428571	0.763154	0.355027	1	1	POLH_HUMAN	WRN_HUMAN	RFC3_HUMAN	DPOD3_HUMAN	DPOE1_HUMAN	DPOLA_HUMAN
biological_process	GO:0021895	cerebral cortex neuron differentiation	6	15	0.4	0.963311	0.0891876	1	1	ELAV4_HUMAN	EOMES_HUMAN	SIN3A_HUMAN	TOX_HUMAN	ZN335_HUMAN	EURL_HUMAN
biological_process	GO:0008585	female gonad development	6	22	0.272727	0.971186	0.0476718	1	1	COT2_HUMAN	BRCA2_HUMAN	PARPT_HUMAN	NU107_HUMAN	ZFP42_HUMAN	AMHR2_HUMAN
biological_process	GO:1901687	glutathione derivative biosynthetic process	6	17	0.352941	0.97551	0.0755153	1	1	E9PHN6_HUMAN	E9PHN7_HUMAN	F6XZQ7_HUMAN	A0A0A0MR85_HUMAN	E9PLF1_HUMAN	A0A0A0MTN3_HUMAN
biological_process	GO:1902018	negative regulation of cilium assembly	6	18	0.333333	0.991765	0.0270938	1	1	EVI5L_HUMAN	LIMK2_HUMAN	MPP9_HUMAN	YAP1_HUMAN	KIF24_HUMAN	CEP97_HUMAN
biological_process	GO:0060337	type I interferon signaling pathway	6	53	0.113208	0.507502	0.600851	1	1	SP100_HUMAN	STAT2_HUMAN	TYK2_HUMAN	TREX1_HUMAN	IRAK1_HUMAN	H3BT31_HUMAN
biological_process	GO:0045162	clustering of voltage-gated sodium channels	6	12	0.5	0.997659	0.0128484	1	1	SPTN4_HUMAN	SCLT1_HUMAN	MYOC_HUMAN	AGRIN_HUMAN	A0A494C0G8_HUMAN	D6RBP0_HUMAN
biological_process	GO:0048599	oocyte development	6	18	0.333333	0.992431	0.0164911	1	1	MEIOC_HUMAN	BCL2_HUMAN	CTNB1_HUMAN	ZGLP1_HUMAN	YTDC2_HUMAN	ATM_HUMAN
biological_process	GO:0070085	glycosylation	6	18	0.333333	1.28679e-07	1	0	1	COG2_HUMAN	COG7_HUMAN	COG1_HUMAN	COG5_HUMAN	COG6_HUMAN	B4GT3_HUMAN
biological_process	GO:0006269	DNA replication, synthesis of RNA primer	6	10	0.6	0.999499	0.00408451	1	1	HELB_HUMAN	PRI2_HUMAN	DPOLA_HUMAN	A0A5F9ZHU7_HUMAN	F5H1I4_HUMAN	A6NMQ1_HUMAN
biological_process	GO:0043086	negative regulation of catalytic activity	6	18	0.333333	0.990972	0.0118616	1	1	NOTC1_HUMAN	NEST_HUMAN	PARP9_HUMAN	MYPT1_HUMAN	ACACB_HUMAN	APBA3_HUMAN
biological_process	GO:0030091	protein repair	6	12	0.5	0.992804	0.0299542	1	1	MSRA_HUMAN	MSRB3_HUMAN	F5H6G9_HUMAN	H0YFW5_HUMAN	F5H199_HUMAN	F5H7C4_HUMAN
biological_process	GO:0000338	protein deneddylation	6	26	0.230769	0.812571	0.340217	1	1	CSN1_HUMAN	J3QQX0_HUMAN	C9JFE4_HUMAN	A8K070_HUMAN	A0A096LP07_HUMAN	A0A096LPJ3_HUMAN
biological_process	GO:0042795	snRNA transcription by RNA polymerase II	6	13	0.461538	0.990236	0.0338617	1	1	ELL_HUMAN	SNPC4_HUMAN	ZC3H8_HUMAN	ICE1_HUMAN	ELL2_HUMAN	U3KQ90_HUMAN
biological_process	GO:0007021	tubulin complex assembly	6	27	0.222222	0.784503	0.375851	1	1	TBCD_HUMAN	A0A0J9YVR1_HUMAN	I3L120_HUMAN	A0A0J9YWI5_HUMAN	A0A0J9YXU4_HUMAN	J3KR97_HUMAN
biological_process	GO:0061418	regulation of transcription from RNA polymerase II promoter in response to hypoxia	6	47	0.12766	0.78193	0.32724	1	1	EGR1_HUMAN	STOX1_HUMAN	G3V5Z7_HUMAN	G3V295_HUMAN	F5GX11_HUMAN	G3V3I1_HUMAN
biological_process	GO:0090279	regulation of calcium ion import	6	8	0.75	0.718848	0.420049	1	1	FCRL3_HUMAN	CTNB1_HUMAN	EGF_HUMAN	PKD2_HUMAN	WNK3_HUMAN	HOME1_HUMAN
biological_process	GO:0030330	DNA damage response, signal transduction by p53 class mediator	6	17	0.352941	0.954514	0.0774674	1	1	E2F7_HUMAN	PAXI1_HUMAN	P53_HUMAN	FOXO3_HUMAN	NBN_HUMAN	MYO6_HUMAN
biological_process	GO:0150105	protein localization to cell-cell junction	6	9	0.666667	0.953574	0.113731	1	1	ARHGI_HUMAN	CGNL1_HUMAN	ZO3_HUMAN	ZO1_HUMAN	DESP_HUMAN	A0A087X0K9_HUMAN
biological_process	GO:2000436	positive regulation of protein neddylation	6	22	0.272727	0.906753	0.204762	1	1	DCNL1_HUMAN	DCNL2_HUMAN	H7C216_HUMAN	C9JVE2_HUMAN	C9JAV2_HUMAN	C9J8R4_HUMAN
biological_process	GO:0002159	desmosome assembly	6	10	0.6	0.999499	0.00408451	1	1	PLAK_HUMAN	PKP2_HUMAN	C9JTX4_HUMAN	C9JK18_HUMAN	C9JKY1_HUMAN	C9J826_HUMAN
biological_process	GO:0042558	pteridine-containing compound metabolic process	6	6	1	0.303853	0.793668	1	1	METH_HUMAN	A0A7P0TAJ0_HUMAN	B1ANE3_HUMAN	A0A7P0T9G7_HUMAN	A0A6Q8PGK3_HUMAN	A0A7P0TAV2_HUMAN
biological_process	GO:0007023	post-chaperonin tubulin folding pathway	6	24	0.25	0.863645	0.270403	1	1	TBCD_HUMAN	A0A0J9YVR1_HUMAN	I3L120_HUMAN	A0A0J9YWI5_HUMAN	A0A0J9YXU4_HUMAN	J3KR97_HUMAN
biological_process	GO:0045721	negative regulation of gluconeogenesis	5	22	0.227273	0.795238	0.379644	1	1	SOGA1_HUMAN	CRY1_HUMAN	EP300_HUMAN	SIK1_HUMAN	SPA12_HUMAN
biological_process	GO:0019933	cAMP-mediated signaling	5	28	0.178571	0.594286	0.544316	1	1	PDE2A_HUMAN	PDE4D_HUMAN	CAP2_HUMAN	DGKQ_HUMAN	AKAP6_HUMAN
biological_process	GO:0042766	nucleosome mobilization	5	21	0.238095	0.825651	0.339898	1	1	ARI1A_HUMAN	BPTF_HUMAN	INO80_HUMAN	NFRKB_HUMAN	ARP8_HUMAN
biological_process	GO:0042100	B cell proliferation	5	35	0.142857	0.681285	0.412984	1	1	BCL2_HUMAN	CAR11_HUMAN	MEF2C_HUMAN	GRP1_HUMAN	PTPRC_HUMAN
biological_process	GO:0030879	mammary gland development	5	21	0.238095	0.687843	0.39232	1	1	ITA2_HUMAN	FAS_HUMAN	NRG1_HUMAN	RHG05_HUMAN	GLI2_HUMAN
biological_process	GO:0022408	negative regulation of cell-cell adhesion	5	18	0.277778	0.709587	0.355031	1	1	GTPB4_HUMAN	E41L5_HUMAN	PODXL_HUMAN	TENR_HUMAN	ABL1_HUMAN
biological_process	GO:0022409	positive regulation of cell-cell adhesion	5	18	0.277778	0.782997	0.262373	1	1	MAGI1_HUMAN	RNS10_HUMAN	SOX2_HUMAN	KI26B_HUMAN	AFAD_HUMAN
biological_process	GO:0045216	cell-cell junction organization	5	28	0.178571	0.986033	0.0207538	1	1	PKHD1_HUMAN	TGFB2_HUMAN	XIRP2_HUMAN	ZO3_HUMAN	ZO1_HUMAN
biological_process	GO:0010811	positive regulation of cell-substrate adhesion	5	35	0.142857	0.880518	0.168865	1	1	ITA3_HUMAN	DMP1_HUMAN	NID1_HUMAN	VITRN_HUMAN	D3YTG3_HUMAN
biological_process	GO:0036151	phosphatidylcholine acyl-chain remodeling	5	20	0.25	0.854037	0.300482	1	1	NR1H2_HUMAN	MBOA2_HUMAN	PA24B_HUMAN	PLB1_HUMAN	I6L893_HUMAN
biological_process	GO:0006644	phospholipid metabolic process	5	69	0.0724638	2.01154e-05	0.999987	0.028	1	ANGL3_HUMAN	PLPR3_HUMAN	PLPR4_HUMAN	PLB1_HUMAN	H0YBY4_HUMAN
biological_process	GO:0046716	muscle cell cellular homeostasis	5	24	0.208333	0.729597	0.458481	1	1	HIF1A_HUMAN	SRF_HUMAN	BAG3_HUMAN	DMD_HUMAN	A0A075B6G3_HUMAN
biological_process	GO:0070932	histone H3 deacetylation	5	15	0.333333	0.95766	0.12491	1	1	PER1_HUMAN	PER2_HUMAN	HDAC9_HUMAN	SIR2_HUMAN	SIR6_HUMAN
biological_process	GO:0002028	regulation of sodium ion transport	5	33	0.151515	0.724054	0.357862	1	1	PER1_HUMAN	NOS3_HUMAN	SIK1_HUMAN	SPTN4_HUMAN	WNK1_HUMAN
biological_process	GO:0007369	gastrulation	5	25	0.2	0.994417	0.00904845	1	1	EXT1_HUMAN	P53_HUMAN	SP20H_HUMAN	HIRA_HUMAN	CER1_HUMAN
biological_process	GO:0032148	activation of protein kinase B activity	5	29	0.172414	0.552976	0.637444	1	1	GRDN_HUMAN	INSR_HUMAN	OSBL8_HUMAN	NRG1_HUMAN	NTRK3_HUMAN
biological_process	GO:0042476	odontogenesis	5	33	0.151515	0.948567	0.0773846	1	1	LAMB1_HUMAN	SDC1_HUMAN	TGFB2_HUMAN	BCOR_HUMAN	CO1A2_HUMAN
biological_process	GO:0044154	histone H3-K14 acetylation	5	18	0.277778	0.863645	0.270403	1	1	PHF14_HUMAN	KAT7_HUMAN	ZZZ3_HUMAN	YETS2_HUMAN	KAT2A_HUMAN
biological_process	GO:0010804	negative regulation of tumor necrosis factor-mediated signaling pathway	5	25	0.2	0.695042	0.496862	1	1	TRAIP_HUMAN	APOA1_HUMAN	GPS2_HUMAN	BIRC1_HUMAN	RFFL_HUMAN
biological_process	GO:0030574	collagen catabolic process	5	40	0.125	0.156351	0.926433	1	1	ATS2_HUMAN	MMP26_HUMAN	PRTN3_HUMAN	TMPS6_HUMAN	ATS14_HUMAN
biological_process	GO:0007492	endoderm development	5	21	0.238095	0.966905	0.0577489	1	1	NOTC1_HUMAN	BPTF_HUMAN	E41L5_HUMAN	EXT1_HUMAN	MED12_HUMAN
biological_process	GO:0001833	inner cell mass cell proliferation	5	13	0.384615	0.979799	0.0733035	1	1	TAF8_HUMAN	CHK1_HUMAN	BRCA2_HUMAN	PALB2_HUMAN	SALL4_HUMAN
biological_process	GO:0043085	positive regulation of catalytic activity	5	40	0.125	0.970545	0.0347039	1	1	DCP1A_HUMAN	BCL2_HUMAN	STX4_HUMAN	A0A087WT55_HUMAN	A0A087WVE6_HUMAN
biological_process	GO:0071391	cellular response to estrogen stimulus	5	25	0.2	0.695042	0.496862	1	1	SFR1_HUMAN	CRHBP_HUMAN	TIF1A_HUMAN	OCSTP_HUMAN	M0QZD8_HUMAN
biological_process	GO:0071897	DNA biosynthetic process	5	36	0.138889	0.902188	0.129745	1	1	CENPF_HUMAN	DPOD3_HUMAN	DPOLL_HUMAN	DPOD2_HUMAN	A0A087WWF6_HUMAN
biological_process	GO:0002639	positive regulation of immunoglobulin production	5	25	0.2	0.962827	0.07246	1	1	STX4_HUMAN	PTPRC_HUMAN	XBP1_HUMAN	TNR4_HUMAN	TLR9_HUMAN
biological_process	GO:0050847	progesterone receptor signaling pathway	5	9	0.555556	0.998065	0.013641	1	1	NEDD4_HUMAN	PRGR_HUMAN	YAP1_HUMAN	TREF1_HUMAN	UBR5_HUMAN
biological_process	GO:0045730	respiratory burst	5	20	0.25	0.942787	0.109622	1	1	NCF1C_HUMAN	NCF1_HUMAN	NCF1B_HUMAN	NCF2_HUMAN	CY24B_HUMAN
biological_process	GO:0006509	membrane protein ectodomain proteolysis	5	28	0.178571	0.956348	0.0830733	1	1	ERAP1_HUMAN	PRTN3_HUMAN	MYH9_HUMAN	ADA19_HUMAN	H0YC66_HUMAN
biological_process	GO:0060216	definitive hemopoiesis	5	15	0.333333	0.954663	0.119883	1	1	SP3_HUMAN	DSRAD_HUMAN	HIPK1_HUMAN	BCR_HUMAN	TGBR3_HUMAN
biological_process	GO:0001662	behavioral fear response	5	28	0.178571	0.819573	0.307745	1	1	BCL2_HUMAN	MORC1_HUMAN	ASIC1_HUMAN	IF4G1_HUMAN	ALS2_HUMAN
biological_process	GO:0061028	establishment of endothelial barrier	5	21	0.238095	0.941078	0.107122	1	1	PECA1_HUMAN	PDE2A_HUMAN	PDE4D_HUMAN	ROBO4_HUMAN	ICAM1_HUMAN
biological_process	GO:0005977	glycogen metabolic process	5	52	0.0961538	0.0812238	0.952395	1	1	KPB1_HUMAN	KPBB_HUMAN	IL6RB_HUMAN	A6NMN0_HUMAN	A6NIT2_HUMAN
biological_process	GO:0010596	negative regulation of endothelial cell migration	5	23	0.217391	0.741444	0.380293	1	1	ACVL1_HUMAN	AGRB1_HUMAN	COT2_HUMAN	SP100_HUMAN	PTPRM_HUMAN
biological_process	GO:0043388	positive regulation of DNA binding	5	34	0.147059	0.468516	0.663335	1	1	ITA2_HUMAN	EGF_HUMAN	SIR2_HUMAN	MYCD_HUMAN	HIPK2_HUMAN
biological_process	GO:0014032	neural crest cell development	5	20	0.25	0.608243	0.501358	1	1	PEF1_HUMAN	KLH12_HUMAN	NRG1_HUMAN	TCOF_HUMAN	TAPT1_HUMAN
biological_process	GO:0014029	neural crest formation	5	8	0.625	0.95766	0.12491	1	1	PEF1_HUMAN	LRP6_HUMAN	KLH12_HUMAN	TCOF_HUMAN	RPA2_HUMAN
biological_process	GO:0006646	phosphatidylethanolamine biosynthetic process	5	17	0.294118	0.924485	0.188895	1	1	PCY2_HUMAN	I3L1R7_HUMAN	I3L3V9_HUMAN	I3L1L9_HUMAN	I3L2Q1_HUMAN
biological_process	GO:0043951	negative regulation of cAMP-mediated signaling	5	12	0.416667	0.987152	0.0528794	1	1	PDE11_HUMAN	PDE2A_HUMAN	PDE3B_HUMAN	PDE4D_HUMAN	RN157_HUMAN
biological_process	GO:0090305	nucleic acid phosphodiester bond hydrolysis	5	12	0.416667	0.704108	0.362749	1	1	DNA2_HUMAN	ENPP1_HUMAN	ATAD5_HUMAN	DDX1_HUMAN	RAD50_HUMAN
biological_process	GO:0090503	RNA phosphodiester bond hydrolysis, exonucleolytic	5	11	0.454545	0.925003	0.174349	1	1	XRN1_HUMAN	PAN3_HUMAN	TOE1_HUMAN	CNOT1_HUMAN	CNOT2_HUMAN
biological_process	GO:0031295	T cell costimulation	5	40	0.125	0.234289	0.872841	1	1	PK3CA_HUMAN	CCL21_HUMAN	CAR11_HUMAN	VAV_HUMAN	BY55_HUMAN
biological_process	GO:0019934	cGMP-mediated signaling	5	23	0.217391	0.562958	0.612957	1	1	PDE2A_HUMAN	GUC2F_HUMAN	IRAG1_HUMAN	GCYB1_HUMAN	ADNP_HUMAN
biological_process	GO:0001556	oocyte maturation	5	19	0.263158	0.942484	0.127119	1	1	BRCA2_HUMAN	TUT4_HUMAN	YTHD2_HUMAN	FOXO3_HUMAN	A0A6Q8JFT6_HUMAN
biological_process	GO:0071872	cellular response to epinephrine stimulus	5	12	0.416667	0.987152	0.0528794	1	1	PDE4B_HUMAN	PDE4D_HUMAN	KCNQ1_HUMAN	SIR2_HUMAN	AT2B4_HUMAN
biological_process	GO:0071902	positive regulation of protein serine/threonine kinase activity	5	40	0.125	0.771968	0.289043	1	1	TAB1_HUMAN	ETAA1_HUMAN	INCE_HUMAN	TELO2_HUMAN	IFNG_HUMAN
biological_process	GO:0032874	positive regulation of stress-activated MAPK cascade	5	19	0.263158	0.948567	0.0773846	1	1	NOD2_HUMAN	TGFB2_HUMAN	TAOK3_HUMAN	TAOK2_HUMAN	CLC7A_HUMAN
biological_process	GO:1903358	regulation of Golgi organization	5	13	0.384615	0.763109	0.419298	1	1	STX18_HUMAN	US6NL_HUMAN	MYOME_HUMAN	AKAP9_HUMAN	CAMP2_HUMAN
biological_process	GO:0035735	intraciliary transport involved in cilium assembly	5	12	0.416667	0.987152	0.0528794	1	1	PCM1_HUMAN	CP131_HUMAN	IFT74_HUMAN	IFT81_HUMAN	I3L2J8_HUMAN
biological_process	GO:0050768	negative regulation of neurogenesis	5	27	0.185185	0.831387	0.226525	1	1	PCM1_HUMAN	NOTC1_HUMAN	PAX6_HUMAN	DP13B_HUMAN	HOOK3_HUMAN
biological_process	GO:0010880	regulation of release of sequestered calcium ion into cytosol by sarcoplasmic reticulum	5	19	0.263158	0.915289	0.172057	1	1	PDE4D_HUMAN	GSTM2_HUMAN	CHD7_HUMAN	AKAP6_HUMAN	DMD_HUMAN
biological_process	GO:0010613	positive regulation of cardiac muscle hypertrophy	5	21	0.238095	0.812571	0.340217	1	1	ROCK2_HUMAN	ROCK1_HUMAN	TWF1_HUMAN	IL6RB_HUMAN	MEF2A_HUMAN
biological_process	GO:1903543	positive regulation of exosomal secretion	5	15	0.333333	0.95766	0.12491	1	1	HGS_HUMAN	STAM1_HUMAN	SDC1_HUMAN	AT132_HUMAN	IFNG_HUMAN
biological_process	GO:0039702	viral budding via host ESCRT complex	5	31	0.16129	0.450356	0.725245	1	1	CHM4C_HUMAN	CHMP7_HUMAN	CHMP6_HUMAN	VP37A_HUMAN	CHM2B_HUMAN
biological_process	GO:0050776	regulation of immune response	5	64	0.078125	0.200619	0.82121	1	1	PTPRD_HUMAN	FCG2A_HUMAN	LAG3_HUMAN	CD22_HUMAN	ENTP7_HUMAN
biological_process	GO:0048240	sperm capacitation	5	32	0.15625	0.25313	0.868042	1	1	SEMG1_HUMAN	S26A8_HUMAN	ROP1L_HUMAN	SEMG2_HUMAN	H7C4T4_HUMAN
biological_process	GO:1904706	negative regulation of vascular associated smooth muscle cell proliferation	5	23	0.217391	0.763109	0.419298	1	1	TAFA5_HUMAN	CNN1_HUMAN	CDN1B_HUMAN	MEF2C_HUMAN	MYCD_HUMAN
biological_process	GO:2000353	positive regulation of endothelial cell apoptotic process	5	19	0.263158	0.880117	0.261852	1	1	ECSCR_HUMAN	CD248_HUMAN	XBP1_HUMAN	FOXO3_HUMAN	BY55_HUMAN
biological_process	GO:0048566	embryonic digestive tract development	5	18	0.277778	0.819573	0.307745	1	1	SALL1_HUMAN	TGFB2_HUMAN	GLI2_HUMAN	GLI3_HUMAN	A0A7I2PJA1_HUMAN
biological_process	GO:1900264	positive regulation of DNA-directed DNA polymerase activity	5	13	0.384615	0.979799	0.0733035	1	1	CTF18_HUMAN	PSF3_HUMAN	PSF2_HUMAN	RFC3_HUMAN	DCC1_HUMAN
biological_process	GO:0043280	positive regulation of cysteine-type endopeptidase activity involved in apoptotic process	5	50	0.1	0.0762407	0.952803	1	1	MALT1_HUMAN	HTRA2_HUMAN	NOD1_HUMAN	A4_HUMAN	CLC7A_HUMAN
biological_process	GO:0051898	negative regulation of protein kinase B signaling	5	41	0.121951	0.210083	0.894984	1	1	PKHA1_HUMAN	PKHD1_HUMAN	XDH_HUMAN	PHLP1_HUMAN	TSC2_HUMAN
biological_process	GO:0030948	negative regulation of vascular endothelial growth factor receptor signaling pathway	5	19	0.263158	0.880117	0.261852	1	1	HGS_HUMAN	HHEX_HUMAN	EPN2_HUMAN	NEDD4_HUMAN	CADM4_HUMAN
biological_process	GO:0043552	positive regulation of phosphatidylinositol 3-kinase activity	5	33	0.151515	0.498789	0.670957	1	1	CCL21_HUMAN	CD19_HUMAN	NOD2_HUMAN	BAKOR_HUMAN	AMRA1_HUMAN
biological_process	GO:0061072	iris morphogenesis	5	9	0.555556	0.998065	0.013641	1	1	HIF1A_HUMAN	HIPK1_HUMAN	PAX6_HUMAN	WNT2_HUMAN	HIPK2_HUMAN
biological_process	GO:0060037	pharyngeal system development	5	19	0.263158	0.851235	0.275563	1	1	EYA1_HUMAN	SIX4_HUMAN	PTC1_HUMAN	HXA2_HUMAN	ACVR1_HUMAN
biological_process	GO:0021612	facial nerve structural organization	5	9	0.555556	0.998065	0.013641	1	1	PLXA3_HUMAN	PLXA4_HUMAN	EGR2_HUMAN	NRP2_HUMAN	HXB2_HUMAN
biological_process	GO:0043931	ossification involved in bone maturation	5	13	0.384615	0.784503	0.375851	1	1	PLXB1_HUMAN	EXT1_HUMAN	ATS7_HUMAN	SEM4D_HUMAN	ATS12_HUMAN
biological_process	GO:0050918	positive chemotaxis	5	18	0.277778	0.847282	0.256286	1	1	PLXB3_HUMAN	ANGP1_HUMAN	SCG2_HUMAN	X3CL1_HUMAN	TSC2_HUMAN
biological_process	GO:0045765	regulation of angiogenesis	5	39	0.128205	0.993676	0.00919577	1	1	PLXD1_HUMAN	CTNB1_HUMAN	NF1_HUMAN	SP100_HUMAN	RECK_HUMAN
biological_process	GO:2000773	negative regulation of cellular senescence	5	19	0.263158	0.880117	0.261852	1	1	M3K3_HUMAN	TERF2_HUMAN	ZKSC3_HUMAN	P63_HUMAN	ABL1_HUMAN
biological_process	GO:0002862	negative regulation of inflammatory response to antigenic stimulus	5	25	0.2	0.483713	0.697807	1	1	NOD2_HUMAN	RHDF2_HUMAN	PSA1_HUMAN	B3KWA8_HUMAN	A0A0A0MSC1_HUMAN
biological_process	GO:0036092	phosphatidylinositol-3-phosphate biosynthetic process	5	12	0.416667	0.987152	0.0528794	1	1	PK3C3_HUMAN	PK3CA_HUMAN	P3C2A_HUMAN	PK3CG_HUMAN	BAKOR_HUMAN
biological_process	GO:0006623	protein targeting to vacuole	5	26	0.192308	0.761876	0.351004	1	1	VP13D_HUMAN	VP37A_HUMAN	VP13C_HUMAN	VP13A_HUMAN	AP3D1_HUMAN
biological_process	GO:0050708	regulation of protein secretion	5	16	0.3125	0.85415	0.183616	1	1	PK3C3_HUMAN	ARFP1_HUMAN	DNJC1_HUMAN	RHDF2_HUMAN	RHDF1_HUMAN
biological_process	GO:0035855	megakaryocyte development	5	19	0.263158	0.880117	0.261852	1	1	TPO_HUMAN	MED1_HUMAN	EP300_HUMAN	SRF_HUMAN	ABI1_HUMAN
biological_process	GO:2000811	negative regulation of anoikis	5	18	0.277778	0.903658	0.224492	1	1	PK3CA_HUMAN	BCL2_HUMAN	NOTC1_HUMAN	NTRK2_HUMAN	B2CL1_HUMAN
biological_process	GO:0010592	positive regulation of lamellipodium assembly	5	29	0.172414	0.552976	0.637444	1	1	PK3CA_HUMAN	AVIL_HUMAN	P85A_HUMAN	ABI2_HUMAN	AUTS2_HUMAN
biological_process	GO:0043457	regulation of cellular respiration	5	7	0.714286	0.669973	0.466098	1	1	PK3CA_HUMAN	PRD16_HUMAN	NOS2_HUMAN	PNPT1_HUMAN	TREX1_HUMAN
biological_process	GO:1990961	xenobiotic detoxification by transmembrane export across the plasma membrane	5	13	0.384615	0.979799	0.0733035	1	1	MDR1_HUMAN	S47A2_HUMAN	S47A1_HUMAN	E7EX57_HUMAN	C9JAE6_HUMAN
biological_process	GO:0051000	positive regulation of nitric-oxide synthase activity	5	22	0.227273	0.795238	0.379644	1	1	HIF1A_HUMAN	NOD1_HUMAN	TERF2_HUMAN	FCER2_HUMAN	CAPON_HUMAN
biological_process	GO:0001952	regulation of cell-matrix adhesion	5	13	0.384615	0.982269	0.0295902	1	1	BCL2_HUMAN	NF1_HUMAN	PKHD1_HUMAN	TSC1_HUMAN	ONEC2_HUMAN
biological_process	GO:0097242	amyloid-beta clearance	5	13	0.384615	0.964795	0.0755427	1	1	LRP2_HUMAN	LRP1_HUMAN	INSR_HUMAN	ITAM_HUMAN	LDLR_HUMAN
biological_process	GO:0070365	hepatocyte differentiation	5	15	0.333333	0.924485	0.188895	1	1	E2F7_HUMAN	ITA2_HUMAN	CPSM_HUMAN	HNF1B_HUMAN	E2F8_HUMAN
biological_process	GO:0006177	GMP biosynthetic process	5	15	0.333333	0.940971	0.145963	1	1	IMDH1_HUMAN	PUR6_HUMAN	PUR8_HUMAN	C9J381_HUMAN	A0A3B3IRL5_HUMAN
biological_process	GO:0010498	proteasomal protein catabolic process	5	36	0.138889	0.137757	0.884207	1	1	PSA6_HUMAN	DDI2_HUMAN	DDI1_HUMAN	PSA1_HUMAN	NR1D1_HUMAN
biological_process	GO:0035024	negative regulation of Rho protein signal transduction	5	24	0.208333	0.729597	0.458481	1	1	KANK1_HUMAN	HEG1_HUMAN	ITA3_HUMAN	CC125_HUMAN	MYOC_HUMAN
biological_process	GO:0006337	nucleosome disassembly	5	19	0.263158	0.880117	0.261852	1	1	SMRD1_HUMAN	HMGA1_HUMAN	ARI1A_HUMAN	ARID2_HUMAN	SMRD3_HUMAN
biological_process	GO:0060349	bone morphogenesis	5	30	0.166667	0.568474	0.532536	1	1	LRP5_HUMAN	LTBP3_HUMAN	ATG9B_HUMAN	CHSS1_HUMAN	J3KP65_HUMAN
biological_process	GO:0002227	innate immune response in mucosa	5	23	0.217391	0.763109	0.419298	1	1	NOD2_HUMAN	RNAS2_HUMAN	NOS2_HUMAN	BPIB1_HUMAN	APOA4_HUMAN
biological_process	GO:0001817	regulation of cytokine production	5	61	0.0819672	0.928626	0.0846196	1	1	BCL6B_HUMAN	ELF1_HUMAN	ZN287_HUMAN	IF2B2_HUMAN	D6RAP2_HUMAN
biological_process	GO:0002063	chondrocyte development	5	17	0.294118	0.776991	0.371743	1	1	RUNX2_HUMAN	ECM1_HUMAN	CHSS1_HUMAN	CHSTB_HUMAN	H0YMF1_HUMAN
biological_process	GO:0044648	histone H3-K4 dimethylation	5	7	0.714286	0.999773	0.00315417	1	1	SET1A_HUMAN	SET1B_HUMAN	KMT2D_HUMAN	KMT2A_HUMAN	PRDM9_HUMAN
biological_process	GO:0051984	positive regulation of chromosome segregation	5	11	0.454545	0.972906	0.0749972	1	1	SMC2_HUMAN	NUMA1_HUMAN	SMC4_HUMAN	CDC6_HUMAN	CNDH2_HUMAN
biological_process	GO:0000245	spliceosomal complex assembly	5	33	0.151515	0.724819	0.376728	1	1	RBM5_HUMAN	DDX1_HUMAN	CRNL1_HUMAN	SCAFB_HUMAN	SRPK1_HUMAN
[truncated: 17,003 more rows]
[truncated: 1,925 more columns]

## Sheet: polyQ
GO domain	GO ID	GO term	polyQ protein	total number	number / total	raw p-value under-representation	raw p-value over-representation	FWER under-representation	FWER over-representation	Gene Name
[truncated: 18,690 more rows]
[truncated: 639 more columns]

[truncated: 20 more sheets: polyQ⁄N, polyN, polyY, polyW, polyC, polyP, polyA, polyS, polyT, polyD, polyE, polyG, polyF, polyH, polyI, polyL, polyV, polyM, polyR, polyK]
