# Supplementary material for: Noncanonical usage of stop codons in ciliates expands proteins with Q-rich motifs
Source: bioRxiv preprint, doi:10.1101/2020.12.08.407247, version 3 (2023-11-13)
Supplement: Dataset DS31 [file 407247_file45.xlsx]

## Sheet: SCD
GO domain	GO ID	GO term	SCD protein	total number	number / total	raw p-value under-representation	raw p-value over-representation	FWER under-representation	FWER over-representation	Gene Name
cellular_component	GO:0005634	nucleus	992	6057	0.163777	1	6.75253e-57	1	0	BLH6_ARATH	KCY2_ARATH	PDF2_ARATH	PDI11_ARATH	PHYA_ARATH	PHYB_ARATH	PHYC_ARATH	PHYD_ARATH	PHYE_ARATH	SPA3_ARATH	SPA2_ARATH	MOM1_ARATH	NRPE1_ARATH	PCFS4_ARATH	RBLOT_ARATH	REC1_ARATH	R13L4_ARATH	PEP_ARATH	RAP24_ARATH	RH1_ARATH	RH40_ARATH	NAR1_ARATH	SMC21_ARATH	SMG7_ARATH	SEP1_ARATH	SLK3_ARATH	TINY_ARATH	TIC_ARATH	RSA1_ARATH	RTEL1_ARATH	PATH1_ARATH	SLK1_ARATH	TRP6_ARATH	SM3L1_ARATH	SM3L2_ARATH	TRB4_ARATH	SEC3B_ARATH	TIF4A_ARATH	TIF4B_ARATH	TIF6B_ARATH
cellular_component	GO:0016021	integral component of membrane	684	7990	0.085607	1.68204e-22	1	0	1	PDLP1_ARATH	PEK11_ARATH	PEK12_ARATH	PEK13_ARATH	PEK14_ARATH	PEK15_ARATH	PCR4_ARATH	UXT2_ARATH	UXT3_ARATH	RBOHF_ARATH	RBOHI_ARATH	RBL11_ARATH	RMR4_ARATH	SYP21_ARATH	SYP22_ARATH	SYP31_ARATH	SYP32_ARATH	MLO15_ARATH	TIC40_ARATH	PUP7_ARATH	SRF6_ARATH	SD31_ARATH	SRF8_ARATH	RLP47_ARATH	PSBD_ARATH	RER6_ARATH	SCY2_ARATH	M140_ARATH	AVT1C_ARATH	ATG9_ARATH	BASS3_ARATH	ADT2_ARATH	LK111_ARATH	FAX2_ARATH	FUT8_ARATH	GLR34_ARATH	CRLK2_ARATH	FKB42_ARATH	MIK2_ARATH	HMDH1_ARATH
molecular_function	GO:0005524	ATP binding	643	3748	0.171558	1	2.09314e-26	1	0	KCY2_ARATH	PDPK1_ARATH	PEK11_ARATH	PEK12_ARATH	PEK13_ARATH	PEK14_ARATH	PEK15_ARATH	SPA3_ARATH	SPA2_ARATH	MOM1_ARATH	RECA3_ARATH	RBG3_ARATH	RENT1_ARATH	RH1_ARATH	RH40_ARATH	SMC21_ARATH	RPP4_ARATH	RTEL1_ARATH	RUK_ARATH	SRF6_ARATH	SD31_ARATH	SM3L1_ARATH	SM3L2_ARATH	SCY2B_ARATH	SRF8_ARATH	RH11_ARATH	RECQ2_ARATH	RH24_ARATH	RH49_ARATH	STY8_ARATH	CKL4_ARATH	M2K1_ARATH	M2K2_ARATH	GRF8_ARATH	HF101_ARATH	M3K1_ARATH	M3K3A_ARATH	M3KE2_ARATH	DNAJ1_ARATH	INO80_ARATH
cellular_component	GO:0005737	cytoplasm	376	2968	0.126685	1.25473e-08	1	0	1	KCY2_ARATH	PDPK1_ARATH	PHYA_ARATH	SERB1_ARATH	PCFS4_ARATH	REC1_ARATH	PEP_ARATH	RENT1_ARATH	PMIR1_ARATH	TRP1_ARATH	SOT16_ARATH	RECQ2_ARATH	REC2_ARATH	VPS39_ARATH	CDC24_ARATH	CKL4_ARATH	LSD1_ARATH	M2K1_ARATH	M2K2_ARATH	HFA1A_ARATH	LRP1B_ARATH	LRP1C_ARATH	M3KE2_ARATH	AROD1_ARATH	DNAJ1_ARATH	JGB_ARATH	ADK2_ARATH	AEE19_ARATH	ARI1_ARATH	ANM13_ARATH	KN5B_ARATH	CPSF_ARATH	JHS1_ARATH	KN14N_ARATH	BZP10_ARATH	IMPA4_ARATH	IQD17_ARATH	CYP63_ARATH	DCL2_ARATH	ICR5_ARATH
molecular_function	GO:0046872	metal ion binding	357	2781	0.128371	0.148446	0.86276	1	1	PER61_ARATH	PLY12_ARATH	MOM1_ARATH	NRPE1_ARATH	PCFS4_ARATH	RBOHI_ARATH	PER12_ARATH	RMR4_ARATH	NAR1_ARATH	RTEL1_ARATH	NCED9_ARATH	RECQ2_ARATH	HF101_ARATH	DNAJ1_ARATH	AIR12_ARATH	AK10B_ARATH	AGD7_ARATH	ARI1_ARATH	C3H39_ARATH	C3H10_ARATH	CPSF_ARATH	JHS1_ARATH	KN7D_ARATH	IP5PC_ARATH	C3H28_ARATH	C3H65_ARATH	DCL2_ARATH	GLTB2_ARATH	DCL3_ARATH	FES1_ARATH	KN7M_ARATH	C3H58_ARATH	C3H43_ARATH	GLTB1_ARATH	IDD7_ARATH	LOX4_ARATH	NUDT9_ARATH	GIS3_ARATH	BRG1_ARATH	B561C_ARATH
molecular_function	GO:0003677	DNA binding	349	1794	0.194537	1	5.83841e-39	1	0	PDF2_ARATH	NRPE1_ARATH	RAP24_ARATH	RENT1_ARATH	RTEL1_ARATH	TRP6_ARATH	RPOT3_ARATH	RECQ2_ARATH	LSH2_ARATH	LSH7_ARATH	LSH9_ARATH	BH115_ARATH	HFA1A_ARATH	M3K1_ARATH	HRS1_ARATH	INO80_ARATH	ARFC_ARATH	C3H39_ARATH	C3H10_ARATH	CPSF_ARATH	JHS1_ARATH	C3H28_ARATH	C3H65_ARATH	DDM1_ARATH	FES1_ARATH	HDG4_ARATH	ARFU_ARATH	AP2L1_ARATH	C3H58_ARATH	C3H43_ARATH	GTL1_ARATH	IDD7_ARATH	MFP1_ARATH	BZP63_ARATH	CHR8_ARATH	CHR9_ARATH	BZP43_ARATH	ERF03_ARATH	AZF2_ARATH	BH048_ARATH
molecular_function	GO:0003700	DNA-binding transcription factor activity	344	1909	0.180199	1	4.61335e-17	1	0	BLH6_ARATH	PDF2_ARATH	RAP24_ARATH	TINY_ARATH	TRB4_ARATH	PLET1_ARATH	BH115_ARATH	BPC3_ARATH	HHO5_ARATH	HFA1A_ARATH	LRL1_ARATH	LRL2_ARATH	IAA32_ARATH	IAA9_ARATH	HRS1_ARATH	ARFC_ARATH	ARFL_ARATH	C3H39_ARATH	BH067_ARATH	BH071_ARATH	HFB2A_ARATH	GAI_ARATH	C3H28_ARATH	BZP10_ARATH	HDG4_ARATH	ARFU_ARATH	AP2L1_ARATH	FHY3_ARATH	GTL1_ARATH	IDD7_ARATH	HFA6A_ARATH	FAR1_ARATH	GIS3_ARATH	BZP63_ARATH	BZP43_ARATH	ERF03_ARATH	AZF2_ARATH	BH048_ARATH	AGL42_ARATH	ARFK_ARATH
cellular_component	GO:0005886	plasma membrane	322	2866	0.112352	0.381164	0.641817	1	1	PDLP1_ARATH	PEK11_ARATH	PEK12_ARATH	PEK13_ARATH	PEK14_ARATH	PEK15_ARATH	PDI12_ARATH	RBOHF_ARATH	RBOHI_ARATH	R13L4_ARATH	SFH10_ARATH	RIN4_ARATH	TRP1_ARATH	SRF6_ARATH	SD31_ARATH	SCPDL_ARATH	SEC3A_ARATH	SEC3B_ARATH	SRF8_ARATH	RLP47_ARATH	REC2_ARATH	VPS39_ARATH	CSI3_ARATH	HEXO3_ARATH	GRDP1_ARATH	M2K2_ARATH	ATP1_ARATH	AVT1C_ARATH	HAP2_ARATH	LRP1C_ARATH	M3K1_ARATH	M3KE2_ARATH	AIR12_ARATH	ADK2_ARATH	BSK4_ARATH	LK111_ARATH	COPB2_ARATH	COBL8_ARATH	GLR34_ARATH	IAN4_ARATH
cellular_component	GO:0005829	cytosol	250	2614	0.0956389	8.4127e-05	0.999936	0.006	1	KCY2_ARATH	PHYB_ARATH	REC1_ARATH	RENT1_ARATH	NAR1_ARATH	RIN4_ARATH	PHT21_ARATH	SPE1_ARATH	SDE5_ARATH	SEC3A_ARATH	RH11_ARATH	REC2_ARATH	STY8_ARATH	EIF3A_ARATH	HHO5_ARATH	HF101_ARATH	MMSA_ARATH	CAPP4_ARATH	ADK2_ARATH	ANM13_ARATH	BIG2_ARATH	FAX2_ARATH	BIG4_ARATH	MFP2_ARATH	EPN2_ARATH	KAD4_ARATH	NUDT9_ARATH	ODO2B_ARATH	EXA1_ARATH	MFP1_ARATH	MGL_ARATH	NDUAC_ARATH	CK5P1_ARATH	CP33_ARATH	GNOM_ARATH	LEA7_ARATH	CTU2_ARATH	B561O_ARATH	AB5B_ARATH	BZP29_ARATH
biological_process	GO:0006355	regulation of transcription, DNA-templated	208	1172	0.177474	1	5.00788e-18	1	0	PDP3_ARATH	PDP5_ARATH	PHYA_ARATH	PHYC_ARATH	PHYD_ARATH	PHYE_ARATH	RSA1_ARATH	RTEL1_ARATH	BPC3_ARATH	GRF8_ARATH	HHO5_ARATH	LRL1_ARATH	LRL2_ARATH	HRS1_ARATH	C3H39_ARATH	BH067_ARATH	BH071_ARATH	GAI_ARATH	LBD36_ARATH	C3H28_ARATH	FRS2_ARATH	ARFU_ARATH	IDD7_ARATH	GIS3_ARATH	BLI_ARATH	MED16_ARATH	BH048_ARATH	BZP29_ARATH	FRS4_ARATH	GIS_ARATH	GBF2_ARATH	FRS6_ARATH	FB9_ARATH	ERF55_ARATH	PIL1_ARATH	MSI5_ARATH	BH047_ARATH	LUH_ARATH	MB3R4_ARATH	ARFV_ARATH
cellular_component	GO:0009507	chloroplast	177	2041	0.0867222	5.05164e-07	1	0	1	PDI12_ARATH	SERB1_ARATH	RBL11_ARATH	SCAR4_ARATH	TIC40_ARATH	PHT21_ARATH	SPE1_ARATH	RPOT3_ARATH	PSBD_ARATH	RER6_ARATH	LINS_ARATH	MAOP4_ARATH	ATP1_ARATH	HF101_ARATH	AROD1_ARATH	ICR2_ARATH	KN12A_ARATH	FAX2_ARATH	HMOX2_ARATH	GLR34_ARATH	GLTB2_ARATH	KN7M_ARATH	GPMA2_ARATH	GLTB1_ARATH	LOX4_ARATH	MFP1_ARATH	NADK2_ARATH	CPNB1_ARATH	CP33_ARATH	DEXH7_ARATH	EGY2_ARATH	KEA2_ARATH	KEA3_ARATH	AKH2_ARATH	ALB4_ARATH	AROG_ARATH	CDP1_ARATH	DCDA2_ARATH	ANTR2_ARATH	CPNB4_ARATH
molecular_function	GO:0003729	mRNA binding	155	1038	0.149326	0.999653	0.000481664	1	0.232	PHYA_ARATH	VCS_ARATH	PCFS4_ARATH	REC1_ARATH	PEP_ARATH	RBG3_ARATH	RENT1_ARATH	RH11_ARATH	PSBD_ARATH	REC2_ARATH	EIF3A_ARATH	LRP1B_ARATH	LRP1C_ARATH	AK10B_ARATH	C3H10_ARATH	CPSF_ARATH	CTF64_ARATH	CTF77_ARATH	DCP5L_ARATH	C3H58_ARATH	C3H43_ARATH	FCA_ARATH	GLTB1_ARATH	EXA1_ARATH	CPNB1_ARATH	CP33_ARATH	CP29A_ARATH	FREE1_ARATH	PRP43_ARATH	FTSH5_ARATH	C3H41_ARATH	DCP1_ARATH	C3H26_ARATH	C3H14_ARATH	REC3_ARATH	RLM3_ARATH	RGGC_ARATH	C3H34_ARATH	RK4_ARATH	PP438_ARATH
molecular_function	GO:0003723	RNA binding	142	1046	0.135755	0.999435	0.000708068	1	0.29	RBG3_ARATH	RENT1_ARATH	RH1_ARATH	RH40_ARATH	PATH1_ARATH	RH11_ARATH	RH24_ARATH	RH49_ARATH	LRP1B_ARATH	LRP1C_ARATH	CPSF_ARATH	JHS1_ARATH	C3H65_ARATH	DCL2_ARATH	DCL3_ARATH	FCA_ARATH	FPA_ARATH	CP33_ARATH	DEXH3_ARATH	DEXH7_ARATH	CYP59_ARATH	BPA1_ARATH	FIPS5_ARATH	CPL3_ARATH	PABP1_ARATH	NOP2C_ARATH	PRP43_ARATH	PP170_ARATH	C3H41_ARATH	PP148_ARATH	PPR45_ARATH	RGGC_ARATH	PP301_ARATH	PP438_ARATH	PP324_ARATH	PP246_ARATH	PP257_ARATH	MORC6_ARATH	PARNL_ARATH	SKI2_ARATH
cellular_component	GO:0005739	mitochondrion	142	1633	0.0869565	8.94115e-07	0.999999	0	1	PDI12_ARATH	RECA3_ARATH	PER12_ARATH	RBG3_ARATH	RTEL1_ARATH	PPR54_ARATH	RPOT3_ARATH	SCPDL_ARATH	SOT16_ARATH	MAOP4_ARATH	DNAJ1_ARATH	MMSA_ARATH	ADT2_ARATH	KN7D_ARATH	GAF1_ARATH	BIODA_ARATH	CDPKT_ARATH	GLTB1_ARATH	KAD4_ARATH	PPR26_ARATH	ODO2B_ARATH	NDUAC_ARATH	NDB2_ARATH	CK5P1_ARATH	DGP2_ARATH	BRE1A_ARATH	DSK2B_ARATH	FAB1B_ARATH	FUM1_ARATH	FUM2_ARATH	DSK2A_ARATH	COPA2_ARATH	MORF1_ARATH	MPK9_ARATH	OST1B_ARATH	NUA_ARATH	DNLI1_ARATH	LEA37_ARATH	PP148_ARATH	PPOX1_ARATH
molecular_function	GO:0016887	ATP hydrolysis activity	129	512	0.251953	1	3.61739e-40	1	0	RH1_ARATH	RH40_ARATH	SMC21_ARATH	RTEL1_ARATH	RH11_ARATH	RECQ2_ARATH	RH24_ARATH	RH49_ARATH	HF101_ARATH	INO80_ARATH	JHS1_ARATH	KN14N_ARATH	KN7D_ARATH	KN12A_ARATH	DDM1_ARATH	KN7M_ARATH	KN14M_ARATH	KN10C_ARATH	KN12B_ARATH	CPNB1_ARATH	DEXH3_ARATH	DEXH7_ARATH	FAB1A_ARATH	FAB1B_ARATH	FAB1C_ARATH	FAB1D_ARATH	KN8A_ARATH	KN8B_ARATH	KINUA_ARATH	KINUB_ARATH	KINUC_ARATH	CPNB4_ARATH	MLH3_ARATH	PRP43_ARATH	FTSH5_ARATH	PIE1_ARATH	MCM2_ARATH	MORC6_ARATH	SMXL8_ARATH	SKI2_ARATH
molecular_function	GO:0000976	transcription cis-regulatory region binding	125	742	0.168464	1	1.2655e-07	1	0	BLH6_ARATH	PDF2_ARATH	MNM1_ARATH	RAP24_ARATH	TINY_ARATH	TRB4_ARATH	PLET1_ARATH	HHO5_ARATH	LRL1_ARATH	IAA9_ARATH	ARFC_ARATH	ARFL_ARATH	HFB2A_ARATH	GAI_ARATH	BZP10_ARATH	GIS3_ARATH	AZF2_ARATH	ARFK_ARATH	BZP29_ARATH	GIS_ARATH	GBF2_ARATH	ARFI_ARATH	GATA3_ARATH	E2FC_ARATH	ERF55_ARATH	MB3R4_ARATH	RAP23_ARATH	ARFS_ARATH	ARFV_ARATH	PAN_ARATH	PIF3_ARATH	TCX2_ARATH	TGA9_ARATH	WRK19_ARATH	TGA5_ARATH	TAF2_ARATH	VAL2_ARATH	TCP20_ARATH	WRK27_ARATH	WRK35_ARATH
molecular_function	GO:0004674	protein serine/threonine kinase activity	123	1022	0.120352	0.778405	0.249899	1	1	PDPK1_ARATH	PEK11_ARATH	PEK12_ARATH	PEK13_ARATH	PEK14_ARATH	PEK15_ARATH	SD31_ARATH	STY8_ARATH	CKL4_ARATH	M2K1_ARATH	M2K2_ARATH	M3K1_ARATH	M3KE2_ARATH	BSK4_ARATH	CRLK2_ARATH	MIK2_ARATH	MPK10_ARATH	HT1_ARATH	CRK2_ARATH	ATM_ARATH	KIPK2_ARATH	ERS1_ARATH	MPS1_ARATH	PAM74_ARATH	MPK9_ARATH	PERK6_ARATH	PERK4_ARATH	GSO1_ARATH	PRK6_ARATH	RLK5_ARATH	RLK6_ARATH	PERK1_ARATH	MPK16_ARATH	PERK9_ARATH	SIK1_ARATH	PERK7_ARATH	RKF3_ARATH	NIK2_ARATH	THE1_ARATH	STY17_ARATH
molecular_function	GO:0008270	zinc ion binding	121	861	0.140534	0.982749	0.0221261	1	1	RENT1_ARATH	SM3L1_ARATH	SM3L2_ARATH	SC24A_ARATH	MAOP4_ARATH	HAC1_ARATH	HAC4_ARATH	HAC5_ARATH	FRS2_ARATH	FHY3_ARATH	FAR1_ARATH	HAC12_ARATH	ODO2B_ARATH	CADH2_ARATH	JJJ1_ARATH	CYP59_ARATH	FRS4_ARATH	GATA3_ARATH	GATA6_ARATH	FRS6_ARATH	BCA5_ARATH	PP170_ARATH	PPR45_ARATH	PP301_ARATH	PP114_ARATH	ATPA_ARATH	PP367_ARATH	PIAL1_ARATH	SF1_ARATH	PP153_ARATH	SC24B_ARATH	MTBC_ARATH	SAP1_ARATH	PPR68_ARATH	PSA_ARATH	TAF2_ARATH	VAL2_ARATH	MBD2_ARATH	PRT6_ARATH	SUVR5_ARATH
cellular_component	GO:0009506	plasmodesma	116	926	0.12527	0.920542	0.095824	1	1	PDLP1_ARATH	PDP3_ARATH	PER12_ARATH	RENT1_ARATH	RUK_ARATH	VPS39_ARATH	LK111_ARATH	JAL41_ARATH	MFP2_ARATH	MIK2_ARATH	NET1A_ARATH	CRK2_ARATH	B561C_ARATH	BCHC1_ARATH	CKI1_ARATH	ARFK_ARATH	ATG11_ARATH	GPDL4_ARATH	P4KA1_ARATH	KN4C_ARATH	NUA_ARATH	BEL1_ARATH	GACP4_ARATH	MORC6_ARATH	SAHH1_ARATH	PDLP2_ARATH	PDLP3_ARATH	RETOL_ARATH	SAC4_ARATH	SAE2_ARATH	SECAB_ARATH	RHM1_ARATH	PTR1_ARATH	RFS2_ARATH	PRP8B_ARATH	SC31B_ARATH	VCL22_ARATH	THE1_ARATH	WBC30_ARATH	MED14_ARATH
molecular_function	GO:0004672	protein kinase activity	108	693	0.155844	0.998946	0.00134616	1	0.526	PDPK1_ARATH	PHYA_ARATH	SPA3_ARATH	SPA2_ARATH	SRF6_ARATH	SCY2B_ARATH	SRF8_ARATH	STY8_ARATH	HT1_ARATH	LYK2_ARATH	CRK2_ARATH	PERK4_ARATH	RLK5_ARATH	PERK1_ARATH	SRF4_ARATH	THE1_ARATH	STY17_ARATH	Y1719_ARATH	Y5720_ARATH	Y2214_ARATH	Y5613_ARATH	Y3037_ARATH	WNK4_ARATH	Y1421_ARATH	Y2685_ARATH	Y2278_ARATH	GHR1_ARATH	AB1K7_ARATH	A0A1P8B8D2_ARATH	A0A1P8ASW4_ARATH	A0A1P8BE51_ARATH	F4HSH9_ARATH	A0A178US29_ARATH	A8MQH3_ARATH	F4HPS1_ARATH	A0A2H1ZE50_ARATH	Q84WU5_ARATH	Q9SAJ2_ARATH	Q501H6_ARATH	Q9FFG4_ARATH
molecular_function	GO:0016787	hydrolase activity	102	758	0.134565	0.513248	0.506728	1	1	MOM1_ARATH	RENT1_ARATH	GAF1_ARATH	CHR8_ARATH	CHR9_ARATH	GRS16_ARATH	PRD1_ARATH	ISW2_ARATH	DCP1_ARATH	MBD4L_ARATH	SMXL4_ARATH	MAA3_ARATH	TOC90_ARATH	TEB_ARATH	CHR10_ARATH	CHR17_ARATH	CHR24_ARATH	CHR27_ARATH	CHR28_ARATH	CHR4_ARATH	GDL62_ARATH	A0A1P8B5G6_ARATH	A0A1P8ATF3_ARATH	A0A1P8AT74_ARATH	A0A1P8BDE7_ARATH	A0A1P8AXT2_ARATH	A0A1I9LT69_ARATH	A0A1I9LMK0_ARATH	A0A2H1ZEJ0_ARATH	Q84JS4_ARATH	O64476_ARATH	A0A1P8B6E0_ARATH	Q42139_ARATH	A0A1P8AVE6_ARATH	Q681A5_ARATH	Q9SZW3_ARATH	Q8GYI7_ARATH	Q9LNR2_ARATH	A0A1P8AY44_ARATH	F4JKN5_ARATH
biological_process	GO:0006952	defense response	100	772	0.129534	0.627544	0.400651	1	1	PDLP1_ARATH	MLO15_ARATH	SMG7_ARATH	RPP4_ARATH	SDE5_ARATH	TIF6B_ARATH	GAP22_ARATH	CHL1_ARATH	BRG1_ARATH	MLO5_ARATH	CHI59_ARATH	DCP1_ARATH	CHI5_ARATH	MORC6_ARATH	PYL1_ARATH	RPS5_ARATH	NIK2_ARATH	UBA2A_ARATH	WRK19_ARATH	PICBP_ARATH	SYD_ARATH	VQ5_ARATH	UBA2C_ARATH	WRKY4_ARATH	TTM1_ARATH	VICTR_ARATH	UBA2B_ARATH	CHI58_ARATH	DGK6_ARATH	2AAA_ARATH	MY102_ARATH	MYB96_ARATH	MYC3_ARATH	ATL17_ARATH	E70H1_ARATH	DRL14_ARATH	DRL16_ARATH	DRL18_ARATH	DRL20_ARATH	DRL23_ARATH
molecular_function	GO:0046983	protein dimerization activity	94	525	0.179048	0.99998	3.04931e-05	1	0.015	SEP1_ARATH	BH115_ARATH	LRL1_ARATH	LRL2_ARATH	BH071_ARATH	BH048_ARATH	AGL42_ARATH	BH140_ARATH	AP3_ARATH	E2FB_ARATH	MORF1_ARATH	PIL1_ARATH	DSLE_ARATH	BH047_ARATH	PIF5_ARATH	PIF3_ARATH	SYGM2_ARATH	SEP2_ARATH	SEP3_ARATH	PIF4_ARATH	BH145_ARATH	BH110_ARATH	BIM1_ARATH	AGL62_ARATH	BH119_ARATH	BH052_ARATH	BH077_ARATH	BH078_ARATH	BH080_ARATH	AGL71_ARATH	ICE1_ARATH	MYC2_ARATH	MYC3_ARATH	MORF4_ARATH	AGL75_ARATH	BH053_ARATH	BH056_ARATH	BH060_ARATH	BH074_ARATH	AGL81_ARATH
cellular_component	GO:0009536	plastid	93	904	0.102876	2.62419e-06	0.999998	0	1	SERB1_ARATH	TIC40_ARATH	SCPDL_ARATH	PSBD_ARATH	ATP1_ARATH	ADT2_ARATH	FAX2_ARATH	GLR34_ARATH	CRLK2_ARATH	GLTB2_ARATH	GPMA2_ARATH	HLB1_ARATH	HIPL2_ARATH	KAD4_ARATH	EXA1_ARATH	AGO10_ARATH	BPA1_ARATH	ERF1X_ARATH	ANTR2_ARATH	GPDL4_ARATH	FUM2_ARATH	OEP37_ARATH	PPP7I_ARATH	P2C71_ARATH	PEX5_ARATH	PMTQ_ARATH	FTSH5_ARATH	FAX1_ARATH	PPOX1_ARATH	PEX14_ARATH	PSB7B_ARATH	RGGC_ARATH	PP246_ARATH	ATPA_ARATH	PYL1_ARATH	OS9_ARATH	RUS1_ARATH	SPP_ARATH	RLP54_ARATH	PSL5_ARATH
molecular_function	GO:0043565	sequence-specific DNA binding	93	436	0.213303	1	6.55831e-12	1	0	PHYB_ARATH	RAP24_ARATH	BPC3_ARATH	GAI_ARATH	BZP10_ARATH	GTL1_ARATH	AZF2_ARATH	BZP29_ARATH	GBF2_ARATH	HDG7_ARATH	GATA6_ARATH	CB60B_ARATH	CB60C_ARATH	FB9_ARATH	CB60D_ARATH	ERF62_ARATH	ERF55_ARATH	MB3R4_ARATH	ARFS_ARATH	SCL8_ARATH	TCP24_ARATH	SCL5_ARATH	TCP6_ARATH	SARD1_ARATH	SCL29_ARATH	SCL6_ARATH	TCP20_ARATH	TCP3_ARATH	VOZ2_ARATH	TCP11_ARATH	WRK47_ARATH	TCP14_ARATH	TCP10_ARATH	SUVR5_ARATH	TCP18_ARATH	TCP22_ARATH	WRK25_ARATH	WRK44_ARATH	WRKY4_ARATH	WRK70_ARATH
molecular_function	GO:0004712	protein serine/threonine/tyrosine kinase activity	91	809	0.112485	0.369568	0.671594	1	1	PDPK1_ARATH	PEK11_ARATH	PEK12_ARATH	PEK13_ARATH	PEK14_ARATH	PEK15_ARATH	SD31_ARATH	STY8_ARATH	CKL4_ARATH	M3K1_ARATH	M3K3A_ARATH	M3KE2_ARATH	BSK4_ARATH	LK111_ARATH	CRLK2_ARATH	CDPKT_ARATH	MIK2_ARATH	MPK10_ARATH	HT1_ARATH	CRK2_ARATH	ATM_ARATH	CDKE1_ARATH	KIPK2_ARATH	MPS1_ARATH	MP3K2_ARATH	PAM74_ARATH	MPK9_ARATH	PERK6_ARATH	LRK42_ARATH	PERK4_ARATH	GSO1_ARATH	LRK12_ARATH	RLK5_ARATH	RLK6_ARATH	LRK11_ARATH	PERK1_ARATH	MPK16_ARATH	PERK9_ARATH	PERK7_ARATH	RKF3_ARATH
molecular_function	GO:0008017	microtubule binding	90	247	0.364372	1	2.81002e-23	1	0	RUK_ARATH	CSI3_ARATH	KN5B_ARATH	KN14N_ARATH	KN7G_ARATH	KN7D_ARATH	KN12A_ARATH	KN7M_ARATH	KN5A_ARATH	KN14M_ARATH	KN5C_ARATH	KN7I_ARATH	KN5D_ARATH	KN10C_ARATH	KN12B_ARATH	KTN82_ARATH	KTN83_ARATH	FH14_ARATH	FPP4_ARATH	KN7N_ARATH	KN8A_ARATH	KN8B_ARATH	KINUA_ARATH	KINUB_ARATH	KINUC_ARATH	KN14R_ARATH	KN14O_ARATH	KN14P_ARATH	KN4C_ARATH	KN7J_ARATH	KN14A_ARATH	KTN84_ARATH	WDL4_ARATH	TANB_ARATH	TORL5_ARATH	WDL5_ARATH	TPX2_ARATH	KN14C_ARATH	QWRF3_ARATH	QWRF6_ARATH
molecular_function	GO:0106310	protein serine kinase activity	90	774	0.116279	0.473418	0.571563	1	1	PDPK1_ARATH	PEK11_ARATH	PEK12_ARATH	PEK13_ARATH	PEK14_ARATH	PEK15_ARATH	SD31_ARATH	STY8_ARATH	CKL4_ARATH	M2K1_ARATH	M2K2_ARATH	M3K1_ARATH	M3K3A_ARATH	M3KE2_ARATH	BSK4_ARATH	LK111_ARATH	CRLK2_ARATH	CDPKT_ARATH	MIK2_ARATH	MPK10_ARATH	HT1_ARATH	CRK2_ARATH	ATM_ARATH	CDKE1_ARATH	KIPK2_ARATH	MPS1_ARATH	MP3K2_ARATH	PAM74_ARATH	MPK9_ARATH	PERK6_ARATH	LRK42_ARATH	PERK4_ARATH	GSO1_ARATH	LRK12_ARATH	RLK5_ARATH	RLK6_ARATH	LRK11_ARATH	PERK1_ARATH	MPK16_ARATH	PERK9_ARATH
cellular_component	GO:0005794	Golgi apparatus	82	984	0.0833333	0.0319496	0.974079	0.961	1	PDI12_ARATH	UXT2_ARATH	UXT3_ARATH	SPSA3_ARATH	SIPL1_ARATH	AGD7_ARATH	APBLB_ARATH	EPN2_ARATH	OFT15_ARATH	IRX9_ARATH	GT14A_ARATH	APBLA_ARATH	KIP_ARATH	GALS1_ARATH	GXM3_ARATH	PAM71_ARATH	COBL2_ARATH	PMTQ_ARATH	PLA2A_ARATH	GOS12_ARATH	MGP4_ARATH	MNS2_ARATH	SC16B_ARATH	STL1_ARATH	SC31B_ARATH	SNX2B_ARATH	MGAT1_ARATH	PR1B3_ARATH	SAB_ARATH	PMTP_ARATH	PR1B2_ARATH	VSR1_ARATH	RBL1_ARATH	ZDH17_ARATH	VP35B_ARATH	TPST_ARATH	TBL39_ARATH	ZDH22_ARATH	PTR2_ARATH	TBL17_ARATH
cellular_component	GO:0016020	membrane	77	900	0.0855556	6.76542e-25	1	0	1	PDPK1_ARATH	SYP21_ARATH	RIN4_ARATH	PUP7_ARATH	TRP1_ARATH	VPS39_ARATH	HEXO3_ARATH	BIG2_ARATH	FAX2_ARATH	IQD5_ARATH	HLB1_ARATH	CCX1_ARATH	KEA2_ARATH	KEA3_ARATH	FH1_ARATH	P4KA1_ARATH	GPAT3_ARATH	KEA1_ARATH	NIPA6_ARATH	DTX34_ARATH	FAX1_ARATH	POT6_ARATH	MEB1_ARATH	SECAB_ARATH	SBT15_ARATH	TOL7_ARATH	TOL5_ARATH	SNX2B_ARATH	EHD1_ARATH	VSR1_ARATH	PUP8_ARATH	VSR6_ARATH	YSL8_ARATH	ZIP11_ARATH	UPS3_ARATH	ZIP4_ARATH	PUP12_ARATH	TOL9_ARATH	VPS51_ARATH	UPS1_ARATH
biological_process	GO:0006357	regulation of transcription by RNA polymerase II	73	392	0.186224	1	5.66734e-07	1	0.001	BLH6_ARATH	SEP1_ARATH	HFA1A_ARATH	LRL1_ARATH	LRL2_ARATH	BH067_ARATH	BH071_ARATH	HFB2A_ARATH	KTI12_ARATH	HFA6A_ARATH	AGL42_ARATH	AP3_ARATH	E2FB_ARATH	E2FC_ARATH	CCT12_ARATH	HSFA5_ARATH	MED17_ARATH	BEL1_ARATH	MED4_ARATH	BLH8_ARATH	BLH11_ARATH	MED6_ARATH	SEP2_ARATH	SEP3_ARATH	PHL_ARATH	RLT1_ARATH	MED14_ARATH	MD20B_ARATH	HUA2_ARATH	BH110_ARATH	AGL62_ARATH	BH052_ARATH	BH080_ARATH	AGL71_ARATH	BLH7_ARATH	NFYA2_ARATH	NFYA5_ARATH	NFYA6_ARATH	NFYB8_ARATH	MED23_ARATH
cellular_component	GO:0005730	nucleolus	73	528	0.138258	0.973944	0.034804	1	1	PDP3_ARATH	NRPE1_ARATH	RBLOT_ARATH	RH11_ARATH	RH49_ARATH	HIT4_ARATH	M3KE2_ARATH	IQD4_ARATH	GAF1_ARATH	DCL3_ARATH	MFP2_ARATH	GATA3_ARATH	E2FC_ARATH	NOP2C_ARATH	NOF1_ARATH	NUA_ARATH	DNLI1_ARATH	FH6_ARATH	MDA2_ARATH	TAD1_ARATH	SKIP_ARATH	RH53_ARATH	RENT3_ARATH	SF1_ARATH	RH14_ARATH	ROS1_ARATH	RH55_ARATH	MSI4_ARATH	Y14_ARATH	MBF1B_ARATH	RH18_ARATH	RH32_ARATH	RHL1_ARATH	TANB_ARATH	MBF1A_ARATH	UBA2C_ARATH	UBN1_ARATH	UBN2_ARATH	MBF1C_ARATH	BIK1_ARATH
cellular_component	GO:0005576	extracellular region	71	1448	0.0490331	1.60453e-19	1	0	1	PER61_ARATH	PME47_ARATH	REC1_ARATH	PER12_ARATH	SBT17_ARATH	PME41_ARATH	PME51_ARATH	PME7_ARATH	LRX2_ARATH	BSK4_ARATH	GUN18_ARATH	CRRS6_ARATH	ERF1Y_ARATH	GUN19_ARATH	GUN20_ARATH	KIP_ARATH	GASA4_ARATH	PME53_ARATH	KEA1_ARATH	PME25_ARATH	DCP1_ARATH	PLA2A_ARATH	FLA9_ARATH	REC3_ARATH	CRRS5_ARATH	RK4_ARATH	PPA28_ARATH	PPA29_ARATH	SBT15_ARATH	SUS5_ARATH	PLRX2_ARATH	RHON1_ARATH	SAB_ARATH	SBT13_ARATH	AB12B_ARATH	APA1_ARATH	APA3_ARATH	CDR1_ARATH	CRR38_ARATH	GUN22_ARATH
cellular_component	GO:0005874	microtubule	70	234	0.299145	1	9.36809e-15	1	0	RUK_ARATH	KN5B_ARATH	KN14N_ARATH	KN7G_ARATH	KN7D_ARATH	KN12A_ARATH	ICR5_ARATH	KN7M_ARATH	KN5A_ARATH	KN14M_ARATH	KN5C_ARATH	KN7I_ARATH	KN5D_ARATH	KN10C_ARATH	KN12B_ARATH	KTN82_ARATH	KTN83_ARATH	KN7N_ARATH	KN8A_ARATH	KN8B_ARATH	KINUA_ARATH	KINUB_ARATH	KINUC_ARATH	GACP3_ARATH	ESP1_ARATH	KN14R_ARATH	KN14O_ARATH	KN14P_ARATH	KN4C_ARATH	KN7J_ARATH	KN14A_ARATH	KTN84_ARATH	GACP4_ARATH	WDL4_ARATH	TBG2_ARATH	TORL5_ARATH	TBG1_ARATH	WDL5_ARATH	TPX2_ARATH	KN14C_ARATH
molecular_function	GO:0043531	ADP binding	66	328	0.20122	0.999996	8.85153e-06	1	0.004	R13L4_ARATH	RPP4_ARATH	CHL1_ARATH	RLM1B_ARATH	RLM3_ARATH	ATPA_ARATH	RPS5_ARATH	WRK19_ARATH	VICTR_ARATH	DRL14_ARATH	DRL16_ARATH	DRL18_ARATH	DRL20_ARATH	DRL23_ARATH	DRL29_ARATH	AGLUP_ARATH	A0A1P8B8D2_ARATH	A0A1P8BAX9_ARATH	F4JNB9_ARATH	A0A1P8BGV5_ARATH	Q9M0Q0_ARATH	Q9FL35_ARATH	A0A1P8B945_ARATH	Q0WPW2_ARATH	A0A1P8AN55_ARATH	A0A1P8B920_ARATH	B3H4T8_ARATH	Q9M0Q5_ARATH	O65506_ARATH	A0A1P8BAZ5_ARATH	Q9ZVX6_ARATH	A0A1P8B6A5_ARATH	A0A1P8B927_ARATH	A0A1P8B928_ARATH	A0A1P8B8D4_ARATH	A0A1P8B6I0_ARATH	A0A1P8B6I4_ARATH	Q9FHF4_ARATH	Q9FHF6_ARATH	F4JNC4_ARATH
biological_process	GO:0006281	DNA repair	65	251	0.258964	1	4.12102e-17	1	0	RECA3_ARATH	RTEL1_ARATH	RECQ2_ARATH	INO80_ARATH	JHS1_ARATH	CHR8_ARATH	CHR9_ARATH	DET1_ARATH	ATM_ARATH	RECA4_ARATH	POLK_ARATH	MBD4L_ARATH	PDS5B_ARATH	MORC6_ARATH	RECAM_ARATH	RQL1_ARATH	RQL3_ARATH	SSRP1_ARATH	SMC1_ARATH	STIL3_ARATH	ROS1_ARATH	MSI4_ARATH	NSE4B_ARATH	XPF_ARATH	STI_ARATH	PSME4_ARATH	TOP3A_ARATH	RFA2A_ARATH	APE2_ARATH	BRCA1_ARATH	ACSA1_ARATH	A0A1P8AV94_ARATH	F4HTM5_ARATH	A0A1P8B4W8_ARATH	A0A1P8ANG9_ARATH	Q0V7S1_ARATH	Q9CAP6_ARATH	Q058K5_ARATH	F4I354_ARATH	A0A1P8ANJ3_ARATH
biological_process	GO:0045893	positive regulation of transcription, DNA-templated	64	300	0.213333	1	2.83681e-10	1	0	FB348_ARATH	ANM13_ARATH	BZP10_ARATH	FHY3_ARATH	FAR1_ARATH	GATA3_ARATH	GATA6_ARATH	E2FB_ARATH	LBD31_ARATH	LAF1_ARATH	C3H14_ARATH	LUH_ARATH	MB3R4_ARATH	RAP23_ARATH	PTM_ARATH	SKIP_ARATH	MED25_ARATH	MBF1B_ARATH	VIP6_ARATH	VOZ2_ARATH	MBF1A_ARATH	WRK48_ARATH	VIP5_ARATH	WRK53_ARATH	MBF1C_ARATH	RGA_ARATH	ATB52_ARATH	AI5L2_ARATH	ARFG_ARATH	ICE1_ARATH	NAC10_ARATH	NAC12_ARATH	NAC40_ARATH	NAC43_ARATH	MY120_ARATH	MYB36_ARATH	MYB65_ARATH	MYB96_ARATH	MYB97_ARATH	MYC2_ARATH
biological_process	GO:0007018	microtubule-based movement	63	128	0.492188	1	5.63488e-27	1	0	KN5B_ARATH	KN14N_ARATH	KN7G_ARATH	KN7D_ARATH	KN12A_ARATH	KN7M_ARATH	KN5A_ARATH	KN14M_ARATH	KN5C_ARATH	KN7I_ARATH	KN5D_ARATH	KN10C_ARATH	KN12B_ARATH	KN7N_ARATH	KN8A_ARATH	KN8B_ARATH	KINUA_ARATH	KINUB_ARATH	KINUC_ARATH	KN14R_ARATH	KN14O_ARATH	KN14P_ARATH	KN4C_ARATH	KN7J_ARATH	KN14A_ARATH	KN14C_ARATH	KN14H_ARATH	KN14K_ARATH	KN14T_ARATH	KN14Q_ARATH	KN12C_ARATH	KN12D_ARATH	KN14D_ARATH	A0A1P8ATF3_ARATH	A0A1I9LN46_ARATH	A0A2H1ZEJ0_ARATH	A0A1P8AVE6_ARATH	A0A1P8AY44_ARATH	A0A1P8AN70_ARATH	A0A1I9LP88_ARATH
molecular_function	GO:0005516	calmodulin binding	61	317	0.192429	0.99996	7.45308e-05	1	0.029	NPG1_ARATH	MLO15_ARATH	SD31_ARATH	IQD4_ARATH	CPSF_ARATH	IQD17_ARATH	IQD5_ARATH	FKB42_ARATH	IQD8_ARATH	KTI12_ARATH	CDPKT_ARATH	IQD19_ARATH	IQD29_ARATH	IQD18_ARATH	MYO10_ARATH	NADK2_ARATH	IQD11_ARATH	IQD26_ARATH	CB60B_ARATH	CB60C_ARATH	CB60D_ARATH	MLO5_ARATH	IQD33_ARATH	MYO12_ARATH	MYO13_ARATH	IQD7_ARATH	PICBP_ARATH	Y1661_ARATH	WRK21_ARATH	UBP6_ARATH	WRK11_ARATH	IQD32_ARATH	IQD14_ARATH	WRKY7_ARATH	BAG6_ARATH	ACA9_ARATH	MYO5_ARATH	MYO7_ARATH	CMTA1_ARATH	CMTA2_ARATH
molecular_function	GO:0000981	DNA-binding transcription factor activity, RNA polymerase II-specific	60	330	0.181818	0.999655	0.000584948	1	0.269	BLH6_ARATH	PDF2_ARATH	SEP1_ARATH	LRL1_ARATH	LRL2_ARATH	BH067_ARATH	BH071_ARATH	HDG4_ARATH	AP2L1_ARATH	AGL42_ARATH	AP3_ARATH	E2FB_ARATH	E2FC_ARATH	BEL1_ARATH	MB3R4_ARATH	BLH8_ARATH	BLH11_ARATH	SEP2_ARATH	SEP3_ARATH	BH110_ARATH	AGL62_ARATH	ATB52_ARATH	BH052_ARATH	BH080_ARATH	AGL71_ARATH	BLH7_ARATH	MYB88_ARATH	NFYA2_ARATH	NFYA5_ARATH	NFYA6_ARATH	NFYB8_ARATH	NFYBA_ARATH	BLH3_ARATH	HGL2_ARATH	AGL75_ARATH	DPB_ARATH	E2FE_ARATH	ATHB7_ARATH	BH053_ARATH	AGL81_ARATH
cellular_component	GO:0005783	endoplasmic reticulum	59	939	0.0628328	2.92023e-10	1	0	1	PDI11_ARATH	PDI12_ARATH	PATH1_ARATH	HAP2_ARATH	AGD7_ARATH	IAN4_ARATH	FKB42_ARATH	HMDH1_ARATH	ERS1_ARATH	OST1B_ARATH	NIPA6_ARATH	DMP3_ARATH	P4H6_ARATH	KCR1_ARATH	RHD32_ARATH	MEB1_ARATH	MNS2_ARATH	OS9_ARATH	SAC8_ARATH	PSL5_ARATH	WDL4_ARATH	PR1B3_ARATH	PMTP_ARATH	PR1B2_ARATH	VSR1_ARATH	ZDH17_ARATH	Y4554_ARATH	VAP13_ARATH	Y3293_ARATH	UPS5_ARATH	FAO4B_ARATH	ECA1_ARATH	ECA4_ARATH	AB1B_ARATH	GDT14_ARATH	FTIP3_ARATH	DEX1_ARATH	F4ISU2_ARATH	F4KDI6_ARATH	Q9SJR4_ARATH
biological_process	GO:0007165	signal transduction	59	434	0.135945	0.999709	0.000371775	1	0.365	RPP4_ARATH	CHL1_ARATH	HT1_ARATH	RLM1B_ARATH	RLM3_ARATH	P2C19_ARATH	WRK19_ARATH	VICTR_ARATH	RGAP1_ARATH	RGAP2_ARATH	RGAP6_ARATH	EDM2_ARATH	A0A1P8B8D2_ARATH	A0A1P8BAX9_ARATH	F4JNB9_ARATH	Q9M0Q0_ARATH	Q9SAJ2_ARATH	Q9FL35_ARATH	Q0WPW2_ARATH	A0A1P8B920_ARATH	B3H4T8_ARATH	O64768_ARATH	O65506_ARATH	A0A1P8BAZ5_ARATH	Q9ZVX6_ARATH	A0A1P8B6A5_ARATH	A0A1P8B927_ARATH	A0A1P8B928_ARATH	A0A1P8B8D4_ARATH	A0A1P8B6I0_ARATH	A0A1P8B6I4_ARATH	Q9FHF4_ARATH	Q9FHF6_ARATH	A0A1P8B6H3_ARATH	F4I5S1_ARATH	Q9SUK4_ARATH	Q9LRY7_ARATH	A0A1P8BC84_ARATH	F4KDB8_ARATH	A0A1P8B697_ARATH
molecular_function	GO:0003676	nucleic acid binding	57	348	0.163793	1	1.90748e-39	1	0	SM3L1_ARATH	SM3L2_ARATH	JJJ1_ARATH	POLR2_ARATH	RQL1_ARATH	RH36_ARATH	POLR1_ARATH	ARS1_ARATH	ENDO2_ARATH	F4JE18_ARATH	A0A1P8AV94_ARATH	A0A1P8BDE7_ARATH	A0A1P8AXT2_ARATH	A0A1I9LT69_ARATH	Q9M1S4_ARATH	O64712_ARATH	A0A1P8AV97_ARATH	F4I526_ARATH	Q9M1F1_ARATH	A0A1P8BCJ1_ARATH	Q93Z55_ARATH	Q8RWY8_ARATH	Q8GXX5_ARATH	A0A1P8BCI5_ARATH	Q9FNQ6_ARATH	A0A1P8BDA9_ARATH	F4K209_ARATH	A0A1P8BDA2_ARATH	F4KFU0_ARATH	A0A1I9LMD3_ARATH	A0A1P8BCJ8_ARATH	A0A1I9LLI6_ARATH	A0A1P8ATX3_ARATH	F4J0I5_ARATH	A0A1P8B2K8_ARATH	F4K203_ARATH	A0A1P8AX12_ARATH	A0A1P8AQR8_ARATH	A0A1P8AV65_ARATH	A0A1P8BDA3_ARATH
cellular_component	GO:0009941	chloroplast envelope	55	551	0.0998185	0.388124	0.657299	1	1	TIC40_ARATH	PHT21_ARATH	SCPDL_ARATH	GRF8_ARATH	BASS3_ARATH	ADT2_ARATH	FAX2_ARATH	GLTB2_ARATH	GLTB1_ARATH	BASS2_ARATH	CPNB1_ARATH	ANTR2_ARATH	CPNB4_ARATH	OEP37_ARATH	KEA1_ARATH	PRP43_ARATH	KN14A_ARATH	FTSH5_ARATH	FAX1_ARATH	PTM_ARATH	MORC6_ARATH	RUS1_ARATH	RR20_ARATH	PAO_ARATH	STR4_ARATH	WRK19_ARATH	TI100_ARATH	TATB_ARATH	IQD32_ARATH	YCF2_ARATH	TPX2_ARATH	OEP80_ARATH	MCMBP_ARATH	AB25B_ARATH	AB7G_ARATH	CLPP4_ARATH	GLGL1_ARATH	GCSP1_ARATH	GCSP2_ARATH	FTSH1_ARATH
molecular_function	GO:0004386	helicase activity	54	124	0.435484	1	7.91785e-37	1	0	MOM1_ARATH	SM3L1_ARATH	SM3L2_ARATH	DCL2_ARATH	DCL3_ARATH	CHR8_ARATH	CHR9_ARATH	ISW2_ARATH	RQL3_ARATH	SYD_ARATH	MAA3_ARATH	TEB_ARATH	HVT1_ARATH	CHR10_ARATH	CHR24_ARATH	CHR27_ARATH	CHR28_ARATH	CHR4_ARATH	F4I7D2_ARATH	A0A1P8AT74_ARATH	F4HTG1_ARATH	O64476_ARATH	A0A1P8B6E0_ARATH	A0A1I9LTA5_ARATH	Q84JK0_ARATH	Q9SZW3_ARATH	A0A1I9LL80_ARATH	C0SUU4_ARATH	Q9ZUI1_ARATH	A0A1P8BDA9_ARATH	A0A1I9LPB0_ARATH	F4I7D3_ARATH	A0A1P8ATZ2_ARATH	A0A1P8AWQ0_ARATH	F4J7T1_ARATH	A0A1P8AXX5_ARATH	A0A1P8AM22_ARATH	F4K203_ARATH	F4I5Z7_ARATH	A0A1I9LPB1_ARATH
cellular_component	GO:0000139	Golgi membrane	53	489	0.108384	0.171447	0.861439	1	1	UXT2_ARATH	UXT3_ARATH	SYP31_ARATH	SYP32_ARATH	SFH10_ARATH	SCY2B_ARATH	SC24A_ARATH	COPB2_ARATH	IRX9_ARATH	CSLD1_ARATH	GT14A_ARATH	KEA3_ARATH	COG4_ARATH	GALS1_ARATH	GALS2_ARATH	GALS3_ARATH	GXM3_ARATH	COPA2_ARATH	PMTC_ARATH	PMTQ_ARATH	B3GT5_ARATH	GOS12_ARATH	MGP4_ARATH	MNS2_ARATH	SC24B_ARATH	PAH1_ARATH	STL1_ARATH	VP53A_ARATH	MGAT1_ARATH	PMTP_ARATH	VSR1_ARATH	RBL1_ARATH	VSR6_ARATH	TPST_ARATH	PMTA_ARATH	ZDH22_ARATH	TBL27_ARATH	VPS54_ARATH	PMTO_ARATH	COPA1_ARATH
biological_process	GO:0015031	protein transport	53	376	0.140957	0.996394	0.00476712	1	0.995	RMR4_ARATH	SFH10_ARATH	BIG4_ARATH	EPN2_ARATH	NU205_ARATH	GNOM_ARATH	ATG11_ARATH	AT18F_ARATH	C3H16_ARATH	COG4_ARATH	FREE1_ARATH	NUP1_ARATH	ATG7_ARATH	GOS12_ARATH	NUP58_ARATH	MIP2_ARATH	SC16B_ARATH	PTR1_ARATH	TI205_ARATH	SNX2B_ARATH	VP53A_ARATH	VA722_ARATH	VPS2A_ARATH	PTR5_ARATH	VPS51_ARATH	PTR2_ARATH	VA713_ARATH	VPS54_ARATH	AMSH3_ARATH	ATG16_ARATH	AT18D_ARATH	AT13A_ARATH	AT18A_ARATH	ATG1B_ARATH	ATG1C_ARATH	MAG5_ARATH	EPN3_ARATH	AT18G_ARATH	Q9C9E5_ARATH	Q6NKR3_ARATH
molecular_function	GO:0140359	ABC-type transporter activity	53	137	0.386861	1	7.61233e-14	1	0	AB14B_ARATH	AB38G_ARATH	AB14G_ARATH	AB15B_ARATH	AB5A_ARATH	AB5B_ARATH	WBC30_ARATH	AB2D_ARATH	AB12B_ARATH	AB34G_ARATH	AB13B_ARATH	AB21G_ARATH	AB22B_ARATH	AB17B_ARATH	AB2B_ARATH	AB40G_ARATH	AB25B_ARATH	AB28G_ARATH	AB1B_ARATH	AB16B_ARATH	AB7B_ARATH	AB7G_ARATH	AB32G_ARATH	AB27G_ARATH	AB11B_ARATH	AB11G_ARATH	AB18B_ARATH	AB30G_ARATH	AB31G_ARATH	AB39G_ARATH	AB6B_ARATH	AB20B_ARATH	AB23B_ARATH	AB42G_ARATH	AB27B_ARATH	A0A1I9LTC2_ARATH	A0A1P8B5S3_ARATH	A0A1P8B1X3_ARATH	A0A1P8B1W8_ARATH	A0NAA8_ARATH
biological_process	GO:0006397	mRNA processing	52	236	0.220339	0.999379	0.000942688	1	0.695	VCR_ARATH	VCS_ARATH	PCFS4_ARATH	RBG3_ARATH	PATH1_ARATH	CTF77_ARATH	DCP5L_ARATH	CP33_ARATH	FIPS5_ARATH	CP29A_ARATH	MORF1_ARATH	PRP43_ARATH	DCP1_ARATH	PARNL_ARATH	SMU1_ARATH	SF1_ARATH	PATH2_ARATH	THOC2_ARATH	Y14_ARATH	PAT1H_ARATH	RP45C_ARATH	RNC1_ARATH	THO5A_ARATH	VIR_ARATH	XRN4_ARATH	SUA_ARATH	UBP1C_ARATH	HUA2_ARATH	RB47B_ARATH	R47BP_ARATH	CFM2_ARATH	DEXHC_ARATH	DEXHE_ARATH	MORF4_ARATH	HUAL3_ARATH	C3H37_ARATH	DEAH2_ARATH	DEAH4_ARATH	DEAH6_ARATH	ESP3_ARATH
molecular_function	GO:0000978	RNA polymerase II cis-regulatory region sequence-specific DNA binding	51	266	0.191729	0.999822	0.000332414	1	0.178	BLH6_ARATH	SEP1_ARATH	HFA1A_ARATH	LRL1_ARATH	LRL2_ARATH	BH067_ARATH	BH071_ARATH	HFB2A_ARATH	HFA6A_ARATH	AGL42_ARATH	AP3_ARATH	E2FB_ARATH	E2FC_ARATH	HSFA5_ARATH	BEL1_ARATH	MB3R4_ARATH	BLH8_ARATH	BLH11_ARATH	SEP2_ARATH	SEP3_ARATH	BH110_ARATH	AGL62_ARATH	BH052_ARATH	BH080_ARATH	AGL71_ARATH	BLH7_ARATH	MYB88_ARATH	NFYA2_ARATH	NFYA5_ARATH	NFYA6_ARATH	BLH3_ARATH	AGL75_ARATH	E2FE_ARATH	BH053_ARATH	AGL81_ARATH	AGL21_ARATH	B3H4N9_ARATH	Q9FIW6_ARATH	Q9FL19_ARATH	O23222_ARATH
molecular_function	GO:0003777	microtubule motor activity	51	108	0.472222	1	2.0729e-22	1	0	KN14N_ARATH	KN7G_ARATH	KN7D_ARATH	KN12A_ARATH	KN7M_ARATH	KN14M_ARATH	KN7I_ARATH	KN10C_ARATH	KN12B_ARATH	KN7N_ARATH	KN8A_ARATH	KN8B_ARATH	KINUA_ARATH	KINUB_ARATH	KINUC_ARATH	KN14R_ARATH	KN4C_ARATH	KN7J_ARATH	KN14A_ARATH	KN14C_ARATH	KN14H_ARATH	KN14K_ARATH	KN14T_ARATH	KN14Q_ARATH	KN12C_ARATH	KN12D_ARATH	KN14D_ARATH	A0A1P8ATF3_ARATH	A0A1I9LN46_ARATH	A0A2H1ZEJ0_ARATH	A0A1P8AY44_ARATH	A0A1P8AN70_ARATH	A0A1I9LP88_ARATH	A0A1P8BH14_ARATH	A0A2H1ZEF8_ARATH	A0A1P8ATH5_ARATH	A0A1I9LN37_ARATH	A0A1P8ATI1_ARATH	A0A1P8BB82_ARATH	F4IC87_ARATH
biological_process	GO:0016567	protein ubiquitination	50	556	0.0899281	0.0506438	0.961332	1	1	CDC24_ARATH	DET1_ARATH	ATL38_ARATH	C3H16_ARATH	ATL3_ARATH	CDC21_ARATH	CD203_ARATH	FZR1_ARATH	FZR2_ARATH	FZR3_ARATH	PUB8_ARATH	SKI20_ARATH	TAUE1_ARATH	UPL2_ARATH	PUB10_ARATH	Y3857_ARATH	PUB13_ARATH	RHF1A_ARATH	UBE4_ARATH	PRT6_ARATH	Y5813_ARATH	Y5880_ARATH	Y1301_ARATH	UPL1_ARATH	Y4193_ARATH	Y5758_ARATH	RHY1A_ARATH	HAKAI_ARATH	CDC22_ARATH	ATL48_ARATH	ATL17_ARATH	ATL29_ARATH	ATL6_ARATH	BTSL1_ARATH	BTSL2_ARATH	ABAP1_ARATH	ATL59_ARATH	Q9M9U8_ARATH	Q9LZR4_ARATH	Q8RUZ7_ARATH
cellular_component	GO:0009570	chloroplast stroma	49	690	0.0710145	1.09095e-05	0.999994	0	1	PDI12_ARATH	SERB1_ARATH	NCED9_ARATH	ATP1_ARATH	HF101_ARATH	AROD1_ARATH	GLTB2_ARATH	GLTB1_ARATH	CPNB1_ARATH	CP33_ARATH	AKH2_ARATH	DCDA2_ARATH	CPNB4_ARATH	GRS16_ARATH	DAPB3_ARATH	PULA1_ARATH	RK4_ARATH	SYGM2_ARATH	SPP_ARATH	RR20_ARATH	PKP1_ARATH	MTBC_ARATH	RPS1_ARATH	SYMM_ARATH	GLYR2_ARATH	ISOA3_ARATH	YCF2_ARATH	PTHC_ARATH	CARB_ARATH	CFM2_ARATH	HIS1A_ARATH	KAD2_ARATH	AB7I_ARATH	ACS_ARATH	CLPP4_ARATH	GLGB2_ARATH	GLGL1_ARATH	GLGS_ARATH	GCSP1_ARATH	DCDA1_ARATH
cellular_component	GO:0000325	plant-type vacuole	49	685	0.0715328	0.000406565	0.999745	0.026	1	PDI11_ARATH	PDI12_ARATH	PER12_ARATH	RH40_ARATH	SYP22_ARATH	SCPDL_ARATH	AVT1C_ARATH	ADT2_ARATH	EPN2_ARATH	KAD4_ARATH	GLR27_ARATH	FUCO1_ARATH	OST1B_ARATH	C2D61_ARATH	GOS12_ARATH	MPK16_ARATH	SKI2_ARATH	SAHH1_ARATH	PUM5_ARATH	PSA6A_ARATH	NUF2_ARATH	WAK1_ARATH	Y1049_ARATH	PTR2_ARATH	RD19C_ARATH	APA1_ARATH	APA2_ARATH	CRR38_ARATH	COBL4_ARATH	GSXL4_ARATH	IRT3_ARATH	FLOT3_ARATH	ECA1_ARATH	CIP1_ARATH	EF2_ARATH	AB27B_ARATH	F4JLY4_ARATH	F4JXY6_ARATH	F4JV81_ARATH	Q9LXU4_ARATH
molecular_function	GO:0004842	ubiquitin-protein transferase activity	49	329	0.148936	0.876025	0.151448	1	1	FB190_ARATH	BRG1_ARATH	BRE1A_ARATH	FB189_ARATH	BRE1B_ARATH	PUB8_ARATH	RGLG2_ARATH	PUB3_ARATH	PUB62_ARATH	PUB4_ARATH	PUB7_ARATH	RZF1_ARATH	PUB6_ARATH	PUB10_ARATH	PUB13_ARATH	RHF1A_ARATH	UPL4_ARATH	PRT6_ARATH	PUB42_ARATH	RHF2A_ARATH	PUB12_ARATH	UPL1_ARATH	RGLG1_ARATH	ATL6_ARATH	BRCA1_ARATH	ATL59_ARATH	F4I080_ARATH	F4HZ08_ARATH	A0A1P8AYN7_ARATH	Q1PDK3_ARATH	Q9M1E4_ARATH	Q8L7G9_ARATH	Q84VP9_ARATH	Q9FJQ8_ARATH	F4JXH7_ARATH	A0A1P8APW2_ARATH	A0A1P8ASY0_ARATH	A8MQL6_ARATH	A0A1P8AVA0_ARATH	F4J048_ARATH
biological_process	GO:0005975	carbohydrate metabolic process	48	523	0.0917782	0.000820938	0.999392	0.294	1	HEXO3_ARATH	IRX9_ARATH	DET1_ARATH	BGA11_ARATH	BGA14_ARATH	MNS2_ARATH	SETH3_ARATH	SWTIE_ARATH	PARG1_ARATH	E1313_ARATH	E133_ARATH	BGAL6_ARATH	CISY2_ARATH	GFAT1_ARATH	GLGB2_ARATH	AGLUP_ARATH	BGAL8_ARATH	BGAL4_ARATH	A0A1P8AVD8_ARATH	A8MRK0_ARATH	F4J3E6_ARATH	Q8GYS2_ARATH	Q9SYK7_ARATH	Q9LXU4_ARATH	Q9M318_ARATH	Q9SRT4_ARATH	Q8VYC5_ARATH	Q9SYK6_ARATH	Q9ZQ51_ARATH	F4IIQ3_ARATH	O22699_ARATH	Q9CAL5_ARATH	A0A1I9LS89_ARATH	A0A1P8AXY5_ARATH	F4JUA6_ARATH	F4I0Z2_ARATH	B3H739_ARATH	A0A1P8B326_ARATH	A0A1P8B357_ARATH	A0A1I9LS88_ARATH
molecular_function	GO:0003724	RNA helicase activity	46	127	0.362205	1	7.49956e-13	1	0	RENT1_ARATH	RH1_ARATH	RH40_ARATH	RH11_ARATH	RH24_ARATH	RH49_ARATH	DEXH3_ARATH	DEXH7_ARATH	PRP43_ARATH	SKI2_ARATH	RH53_ARATH	RH14_ARATH	RH55_ARATH	PRP16_ARATH	RH18_ARATH	RH32_ARATH	RH36_ARATH	RH46_ARATH	DEXH4_ARATH	DEXH5_ARATH	DEXHC_ARATH	DEXHD_ARATH	DEXHE_ARATH	HVT1_ARATH	DEXH1_ARATH	DEAH2_ARATH	DEAH4_ARATH	DEAH5_ARATH	DEAH6_ARATH	ESP3_ARATH	A0A1P8BDE7_ARATH	A0A178VU89_ARATH	A0A1P8AXT2_ARATH	A0A1I9LT69_ARATH	A0A1I9LMK0_ARATH	A0A1P8BDA2_ARATH	A0A1I9LLI6_ARATH	A0A1P8B2K8_ARATH	A0A1P8AX12_ARATH	A0A1P8BDA3_ARATH
cellular_component	GO:0005768	endosome	46	325	0.141538	0.970421	0.03971	1	1	UXT3_ARATH	SYP31_ARATH	SIPL1_ARATH	M3K1_ARATH	EPN2_ARATH	OFT15_ARATH	GNOM_ARATH	FAB1A_ARATH	FAB1B_ARATH	PMTQ_ARATH	GOS12_ARATH	MNS2_ARATH	STL1_ARATH	MGAT1_ARATH	EHD1_ARATH	PMTP_ARATH	PR1B2_ARATH	VSR1_ARATH	VSR6_ARATH	TPST_ARATH	ZDH22_ARATH	PMTO_ARATH	BIK1_ARATH	AMSH3_ARATH	CESA1_ARATH	EPN3_ARATH	FTIP3_ARATH	COBL7_ARATH	Q9FF95_ARATH	F4KHR9_ARATH	Q9LK30_ARATH	Q8H1E1_ARATH	B9DH97_ARATH	Q8S9J3_ARATH	Q9T069_ARATH	F4K8T6_ARATH	A0A1P8ATR6_ARATH	F4HYH6_ARATH	A0A1P8BF56_ARATH	F4IKG5_ARATH
biological_process	GO:0009737	response to abscisic acid	46	365	0.126027	0.849432	0.182107	1	1	ATP1_ARATH	LRP1C_ARATH	DRB1_ARATH	GAI_ARATH	AP2L1_ARATH	KTN82_ARATH	AZF2_ARATH	CMKMT_ARATH	ELF3_ARATH	SKIP_ARATH	PIAL1_ARATH	SF1_ARATH	SPE2_ARATH	TCP14_ARATH	PRT6_ARATH	TTL1_ARATH	WDL7_ARATH	PIAL2_ARATH	WRKY8_ARATH	MBF1C_ARATH	RGA_ARATH	ARS1_ARATH	BADH2_ARATH	AHK2_ARATH	CRR38_ARATH	LRK62_ARATH	MYB88_ARATH	MYC2_ARATH	GLYT7_ARATH	AB40G_ARATH	ABI3_ARATH	CIP1_ARATH	GHR1_ARATH	ATHB7_ARATH	C70B3_ARATH	EF113_ARATH	AB11G_ARATH	AI5L6_ARATH	Q8RWV9_ARATH	Q9CAJ8_ARATH
biological_process	GO:0006325	chromatin organization	46	194	0.237113	1	1.4691e-07	1	0	PHYB_ARATH	SM3L1_ARATH	SM3L2_ARATH	ANM13_ARATH	HAC1_ARATH	HAC4_ARATH	HAC5_ARATH	HAC12_ARATH	BRE1A_ARATH	LDL3_ARATH	MSI5_ARATH	FAS1_ARATH	BRE1B_ARATH	ING2_ARATH	ANM14_ARATH	TAF1B_ARATH	SWI3D_ARATH	EAF1A_ARATH	EAF1B_ARATH	CMT2_ARATH	CHR10_ARATH	CHR4_ARATH	ATX5_ARATH	ATXR3_ARATH	EDM2_ARATH	F4I080_ARATH	A0A1P8ARU4_ARATH	A0A1P8ARV8_ARATH	A0A1I9LL80_ARATH	F4JCS8_ARATH	A0A1P8ARV7_ARATH	Q9SU69_ARATH	A0A1P8ATA1_ARATH	A0A1P8BCY7_ARATH	A0A1I9LPB0_ARATH	F4J7T1_ARATH	A0A1P8APW2_ARATH	A0A1I9LPB1_ARATH	A0A1P8AQG0_ARATH	A0A1P8AYB9_ARATH
biological_process	GO:0045944	positive regulation of transcription by RNA polymerase II	45	197	0.228426	0.999965	7.05435e-05	1	0.094	SEP1_ARATH	SLK3_ARATH	SLK1_ARATH	HAC1_ARATH	HAC4_ARATH	HAC5_ARATH	HAC12_ARATH	AGL42_ARATH	AP3_ARATH	MD10B_ARATH	SEUSS_ARATH	MED25_ARATH	SEP2_ARATH	SEP3_ARATH	SYD_ARATH	AGL62_ARATH	BRM_ARATH	AGL71_ARATH	MD20A_ARATH	AGL75_ARATH	BRCA1_ARATH	GIF1_ARATH	AGL81_ARATH	AGL21_ARATH	F4K4G6_ARATH	Q9FIW6_ARATH	F4JXC7_ARATH	Q9FL19_ARATH	Q8RWG0_ARATH	O23222_ARATH	Q9LIM2_ARATH	Q9FL10_ARATH	A0A1P8BA62_ARATH	Q9LNG8_ARATH	Q9XEF1_ARATH	Q0WRE2_ARATH	Q0WKW1_ARATH	Q9LSE3_ARATH	Q9FKR2_ARATH	A0A1P8BDR0_ARATH
molecular_function	GO:0016301	kinase activity	45	363	0.123967	0.994994	0.00604305	1	0.992	PDPK1_ARATH	CRK2_ARATH	KIPK2_ARATH	PKP1_ARATH	WAK1_ARATH	TTM1_ARATH	Y5520_ARATH	BIK1_ARATH	IRE_ARATH	A0A1I9LQK8_ARATH	A0A1P8AVD8_ARATH	F4KHD5_ARATH	Q9SJQ0_ARATH	Q8GYH9_ARATH	Q9FL24_ARATH	A8MR07_ARATH	Q94KE3_ARATH	Q67ZF1_ARATH	Q8RY98_ARATH	Q9SAE0_ARATH	A0A1P8BD37_ARATH	Q8VYC5_ARATH	Q5Q0H3_ARATH	Q9LP92_ARATH	Q9FM16_ARATH	Q94AB3_ARATH	Q9LIP1_ARATH	F4I2K0_ARATH	Q9LRY7_ARATH	Q9LZS4_ARATH	A0A1P8AWA3_ARATH	F4KF59_ARATH	F4JQR9_ARATH	A0A1I9LTU3_ARATH	A0A178VZ48_ARATH	B3H739_ARATH	F4J3J5_ARATH	A0A1I9LMR2_ARATH	A0A1I9LLS2_ARATH	F4J801_ARATH
biological_process	GO:0051301	cell division	45	333	0.135135	0.999196	0.00122789	1	0.746	SMC21_ARATH	PATH1_ARATH	SPC25_ARATH	CDC24_ARATH	M3KE2_ARATH	BRE1A_ARATH	CDKE1_ARATH	CDC21_ARATH	CD203_ARATH	FZR1_ARATH	FZR2_ARATH	FZR3_ARATH	E2FC_ARATH	CCT12_ARATH	FAS1_ARATH	DNLI1_ARATH	PDS5B_ARATH	PPR29_ARATH	SYCP1_ARATH	SMC1_ARATH	SMC22_ARATH	NUF2_ARATH	HTR12_ARATH	SCL6_ARATH	WAPL1_ARATH	WAPL2_ARATH	XRN4_ARATH	TEB_ARATH	TCP15_ARATH	TPX2_ARATH	KN14C_ARATH	AUG1_ARATH	MYO5_ARATH	CDC22_ARATH	MCMBP_ARATH	GLYT7_ARATH	KN14D_ARATH	CND2_ARATH	CLASP_ARATH	GIF1_ARATH
biological_process	GO:0042742	defense response to bacterium	44	331	0.132931	0.752051	0.298241	1	1	MOM1_ARATH	R13L4_ARATH	RENT1_ARATH	RIN4_ARATH	M2K1_ARATH	LK111_ARATH	EXA1_ARATH	CESA8_ARATH	AB14G_ARATH	AHK3_ARATH	LRK42_ARATH	LRK12_ARATH	LRK11_ARATH	SIK1_ARATH	RPS5_ARATH	RENT3_ARATH	PSL5_ARATH	PAO_ARATH	RIN13_ARATH	SARD1_ARATH	PUB13_ARATH	TI10A_ARATH	WRK27_ARATH	PRT6_ARATH	WRK11_ARATH	WRK48_ARATH	WRK33_ARATH	WRK53_ARATH	LRK16_ARATH	WRK70_ARATH	WRKY8_ARATH	BIK1_ARATH	CDR1_ARATH	ILA_ARATH	LRK62_ARATH	LRK63_ARATH	LRK81_ARATH	AGO2_ARATH	ATL6_ARATH	DRL29_ARATH
biological_process	GO:0009908	flower development	43	210	0.204762	0.999927	0.000117883	1	0.135	PDP3_ARATH	PCFS4_ARATH	SLK3_ARATH	FRL1A_ARATH	FES1_ARATH	FCA_ARATH	FPA_ARATH	BLI_ARATH	ARFF_ARATH	ISW2_ARATH	PIE1_ARATH	LUH_ARATH	LUMI_ARATH	MED25_ARATH	SEP3_ARATH	PHL_ARATH	RLT1_ARATH	PAO_ARATH	MSI4_ARATH	SYD_ARATH	TI10A_ARATH	VIP6_ARATH	XPOT_ARATH	VIP5_ARATH	VIP4_ARATH	AHL18_ARATH	AGL71_ARATH	ARFE_ARATH	NAC40_ARATH	HUAL3_ARATH	LEUNG_ARATH	C3H37_ARATH	AHL22_ARATH	ANT_ARATH	GIGAN_ARATH	EMF2_ARATH	ERF86_ARATH	A0A1P8BA40_ARATH	Q8RWV9_ARATH	O04650_ARATH
biological_process	GO:0050832	defense response to fungus	42	563	0.0746004	0.000898426	0.999455	0.313	1	NRPE1_ARATH	RPP4_ARATH	ATG9_ARATH	CDPKT_ARATH	EXA1_ARATH	MED8_ARATH	CESA8_ARATH	BPA1_ARATH	BRE1A_ARATH	ATG7_ARATH	BECN1_ARATH	LRK12_ARATH	MB3R4_ARATH	PLA12_ARATH	RLM1B_ARATH	RLM3_ARATH	LRK11_ARATH	MED25_ARATH	RETOL_ARATH	RLP52_ARATH	ROS1_ARATH	PRP16_ARATH	THE1_ARATH	PARG1_ARATH	SAG12_ARATH	WAK1_ARATH	PRT6_ARATH	VIP1L_ARATH	WRK33_ARATH	WRK70_ARATH	WRKY8_ARATH	NRPD2_ARATH	BIK1_ARATH	BAG6_ARATH	AT18A_ARATH	MYB29_ARATH	CMTA3_ARATH	EDM2_ARATH	F4HVJ0_ARATH	F4ISU2_ARATH
biological_process	GO:0009793	embryo development ending in seed dormancy	42	324	0.12963	0.812598	0.230682	1	1	PDI11_ARATH	SLK1_ARATH	IAA32_ARATH	NOV_ARATH	MEE12_ARATH	GNOM_ARATH	AZF2_ARATH	ESP1_ARATH	NOF1_ARATH	MCM2_ARATH	LUH_ARATH	NP214_ARATH	KCR1_ARATH	DME_ARATH	SEUSS_ARATH	PPR29_ARATH	SAHH1_ARATH	SYGM2_ARATH	SPP_ARATH	PP273_ARATH	SAE2_ARATH	PP153_ARATH	PRP16_ARATH	WAPL1_ARATH	WRK35_ARATH	TI100_ARATH	VIR_ARATH	WAPL2_ARATH	TTL_ARATH	WOX9_ARATH	OEP80_ARATH	ARFE_ARATH	GEX1_ARATH	NFYA5_ARATH	NFYA6_ARATH	DPB2_ARATH	ABI3_ARATH	AB7I_ARATH	DEAH6_ARATH	Q9C7J5_ARATH
molecular_function	GO:0016491	oxidoreductase activity	42	518	0.0810811	2.52775e-26	1	0	1	SCPDL_ARATH	GLTB2_ARATH	GLTB1_ARATH	HIPL2_ARATH	NDB2_ARATH	LDL3_ARATH	KCR1_ARATH	RHM1_ARATH	PAO_ARATH	DNJ63_ARATH	UCRI2_ARATH	NDB4_ARATH	ALDO4_ARATH	GGLO2_ARATH	GGLO4_ARATH	GGLO5_ARATH	GGLO6_ARATH	BBE23_ARATH	ALDO1_ARATH	BBE14_ARATH	ALDO2_ARATH	ALDO3_ARATH	A0A1P8AVD8_ARATH	A0A1P8BGV6_ARATH	A0A1P8BBH9_ARATH	A0A1P8AS42_ARATH	A0A178UNE5_ARATH	Q8RWK2_ARATH	Q8VYC5_ARATH	A0A1P8AZK7_ARATH	Q9FX95_ARATH	F4K6Z5_ARATH	F4I3C3_ARATH	F4K7J4_ARATH	A0A1P8AZL3_ARATH	B3H739_ARATH	A0A1P8BGW2_ARATH	A0A1P8BGW1_ARATH	F4IAP5_ARATH	A0A1P8AZL6_ARATH
cellular_component	GO:0043231	intracellular membrane-bounded organelle	42	292	0.143836	1	9.06653e-17	1	0	SYP31_ARATH	AB5A_ARATH	PP170_ARATH	PP148_ARATH	PPR45_ARATH	PP301_ARATH	PP324_ARATH	PP246_ARATH	PP257_ARATH	PP153_ARATH	EHD1_ARATH	PP280_ARATH	AUXI2_ARATH	AUL1_ARATH	ACA9_ARATH	HMDH2_ARATH	JAC1_ARATH	A0A1P8BFE6_ARATH	Q9LXZ7_ARATH	Q8L7H5_ARATH	B9DFA5_ARATH	Q9LDF8_ARATH	C0Z305_ARATH	F4KI84_ARATH	A8MR07_ARATH	Q8S8Q2_ARATH	Q94KE3_ARATH	Q9XI12_ARATH	Q9FL94_ARATH	Q9LVS6_ARATH	Q84JI7_ARATH	Q9LVS4_ARATH	Q9SFV1_ARATH	Q9LY31_ARATH	Q9FKS3_ARATH	A0A1P8AVD9_ARATH	F4JX42_ARATH	F4I458_ARATH	A0A178VXX1_ARATH	A0A1I9LMQ3_ARATH
biological_process	GO:0006351	transcription, DNA-templated	42	156	0.269231	1	3.64371e-23	1	0	NRPE1_ARATH	GRF8_ARATH	INO80_ARATH	GTL1_ARATH	PAN_ARATH	RPD2B_ARATH	NRPC2_ARATH	TGA9_ARATH	TGA5_ARATH	TGA10_ARATH	NRPD2_ARATH	BIM1_ARATH	DOG1_ARATH	DOGL2_ARATH	DOGL3_ARATH	ALY2_ARATH	BIM2_ARATH	ALY1_ARATH	A0A1P8BD97_ARATH	A0A2H1ZE87_ARATH	F4JXV3_ARATH	Q8GYX6_ARATH	A0A1P8BB61_ARATH	A0A1P8BCP5_ARATH	A0A178UDY8_ARATH	A0A1R7T3A8_ARATH	A0A1P8B7V6_ARATH	F4INQ5_ARATH	A0A1P8BBN4_ARATH	F4K9L4_ARATH	F4J277_ARATH	A0A1P8B7W1_ARATH	F4K9L2_ARATH	A0A178UHQ5_ARATH	A0A1P8BBP3_ARATH	A0A1I9LNQ9_ARATH	A0A1P8BFS9_ARATH	F4JWU1_ARATH	A0A1I9LNQ8_ARATH	A0A1I9LT22_ARATH
molecular_function	GO:0003953	NAD+ nucleosidase activity	41	237	0.172996	0.996818	0.00527698	1	0.966	WRK19_ARATH	A0A1P8B8D2_ARATH	A0A1P8BAX9_ARATH	F4JNB9_ARATH	Q9M0Q0_ARATH	Q9FL35_ARATH	Q0WPW2_ARATH	A0A1P8B920_ARATH	B3H4T8_ARATH	O65506_ARATH	A0A1P8BAZ5_ARATH	Q9ZVX6_ARATH	A0A1P8B6A5_ARATH	A0A1P8B927_ARATH	A0A1P8B928_ARATH	A0A1P8B8D4_ARATH	A0A1P8B6I0_ARATH	A0A1P8B6I4_ARATH	Q9FHF4_ARATH	Q9FHF6_ARATH	A0A1P8B6H3_ARATH	Q9SUK4_ARATH	A0A1P8BC84_ARATH	F4KDB8_ARATH	A0A1P8B697_ARATH	A0A1P8B919_ARATH	A0A1P8B6H5_ARATH	A0A1P8B7M2_ARATH	A0A1P8B934_ARATH	A0A1P8B8D3_ARATH	F4JNB6_ARATH	F4KDB9_ARATH	A0A1P8AN87_ARATH	F4KD45_ARATH	A0A1P8B6A1_ARATH	A0A1P8BDG8_ARATH	A0A1P8B8G5_ARATH	A0A1P8BGV4_ARATH	A0A1P8B6I2_ARATH	F4JPV9_ARATH
biological_process	GO:0009651	response to salt stress	39	374	0.104278	0.210476	0.829754	1	1	RAP24_ARATH	RSA1_ARATH	SPE1_ARATH	M2K2_ARATH	ATP1_ARATH	M3K1_ARATH	ANM13_ARATH	AP2L1_ARATH	KTN82_ARATH	CMKMT_ARATH	AHK3_ARATH	CPL3_ARATH	PTN2B_ARATH	OS9_ARATH	SMXL4_ARATH	SLAH3_ARATH	SKIP_ARATH	PIAL1_ARATH	SPE2_ARATH	PUM5_ARATH	VOZ2_ARATH	VIR_ARATH	WRK33_ARATH	WRK25_ARATH	TTL1_ARATH	PIAL2_ARATH	UBN1_ARATH	VA713_ARATH	UPS5_ARATH	AT18A_ARATH	AHK2_ARATH	NAC40_ARATH	C70B3_ARATH	EF113_ARATH	AB11G_ARATH	AI5L6_ARATH	Q9LRX5_ARATH	F4HRC9_ARATH	F4HPR9_ARATH
biological_process	GO:0010468	regulation of gene expression	38	150	0.253333	1	4.02775e-31	1	0	MOM1_ARATH	PEP_ARATH	DRB1_ARATH	MSI5_ARATH	RLK5_ARATH	MSI4_ARATH	RNC1_ARATH	TPST_ARATH	TEB_ARATH	Y1049_ARATH	ZWIP2_ARATH	ZWIP4_ARATH	ZWIP5_ARATH	ZWIP6_ARATH	MY120_ARATH	MYB72_ARATH	MYB96_ARATH	MYB97_ARATH	GIF1_ARATH	Q0WLY0_ARATH	Q9FIC2_ARATH	A0A1P8BCJ1_ARATH	A0A1P8BCI5_ARATH	Q9M1Q4_ARATH	O82762_ARATH	F4K209_ARATH	A0A1P8BCJ8_ARATH	A0A1P8AXX0_ARATH	F4HNV0_ARATH	F4ITI2_ARATH	F4IJK5_ARATH	A0A1P8BCJ7_ARATH	A0A1P8BCI2_ARATH	A0A1P8BCK2_ARATH	F4JLJ3_ARATH	A0A1P8BCH6_ARATH	F4KDY1_ARATH	A0A1P8BCL2_ARATH
cellular_component	GO:0005777	peroxisome	37	371	0.0997305	0.574642	0.488651	1	1	RH11_ARATH	GAP22_ARATH	MFP2_ARATH	NDB2_ARATH	PMK_ARATH	PEX14_ARATH	PUMY_ARATH	WEB1_ARATH	NDB4_ARATH	BADH2_ARATH	IBR3_ARATH	ECH2_ARATH	2AAB_ARATH	CISY2_ARATH	AB32G_ARATH	AAT1_ARATH	AXL1_ARATH	Q8RU07_ARATH	Q9LZZ5_ARATH	Q9FIC2_ARATH	A0A1P8BCJ1_ARATH	Q7Y1Z8_ARATH	A0A1P8BCI5_ARATH	Q9M1Q4_ARATH	F4K209_ARATH	F4I3C3_ARATH	A0A1P8BCJ8_ARATH	A0A1P8AXX0_ARATH	F4JJ27_ARATH	F4HNV0_ARATH	F4ITI2_ARATH	A0A1P8BCJ7_ARATH	A0A1P8BCI2_ARATH	A0A1P8BCK2_ARATH	A0A1P8BCH6_ARATH	A0A1P8BCL2_ARATH	F4JGL5_ARATH
biological_process	GO:0071555	cell wall organization	36	338	0.106509	0.0769172	0.940294	1	1	LRX2_ARATH	GUN18_ARATH	FUT8_ARATH	IRX9_ARATH	CESA8_ARATH	GNOM_ARATH	CSLD1_ARATH	GPDL4_ARATH	GUN19_ARATH	GUN20_ARATH	GALS1_ARATH	GALS2_ARATH	GALS3_ARATH	KN4C_ARATH	GSO1_ARATH	GPDL3_ARATH	CALS8_ARATH	RHM1_ARATH	PLRX2_ARATH	XYL2_ARATH	XTH26_ARATH	CESA1_ARATH	GUN22_ARATH	GLYT7_ARATH	E1313_ARATH	CALS3_ARATH	CALS7_ARATH	DEX1_ARATH	CALS5_ARATH	A0A1P8B3K9_ARATH	E9KSP0_ARATH	F4K116_ARATH	F4IW73_ARATH	A0A1P8B3L0_ARATH	F4JT64_ARATH	A0A1I9LQE8_ARATH
biological_process	GO:0009738	abscisic acid-activated signaling pathway	36	219	0.164384	0.91815	0.111961	1	1	RBOHF_ARATH	GRDP1_ARATH	LRP1C_ARATH	AZF2_ARATH	CMKMT_ARATH	FREE1_ARATH	MPK9_ARATH	RGLG5_ARATH	PERK4_ARATH	RGLG2_ARATH	PYL1_ARATH	SF1_ARATH	UBA2A_ARATH	TTL1_ARATH	ZFP6_ARATH	RGLG1_ARATH	2AAA_ARATH	AI5L2_ARATH	ICE1_ARATH	LRK62_ARATH	MYB96_ARATH	MYC2_ARATH	NFYA5_ARATH	LRK63_ARATH	AB40G_ARATH	DOG1_ARATH	ABI3_ARATH	CIP1_ARATH	GHR1_ARATH	AI5L4_ARATH	AI5L5_ARATH	AB30G_ARATH	AB31G_ARATH	AI5L6_ARATH	Q9M9U3_ARATH	F4I3C9_ARATH
biological_process	GO:0006886	intracellular protein transport	35	267	0.131086	0.990181	0.0133862	1	1	SYP21_ARATH	SYP22_ARATH	SYP31_ARATH	SYP32_ARATH	SC24A_ARATH	VPS39_ARATH	COPB2_ARATH	APBLB_ARATH	APBLA_ARATH	COPA2_ARATH	MIP3_ARATH	SC24B_ARATH	PAH1_ARATH	SC31B_ARATH	VP35B_ARATH	LIIP2_ARATH	COPA1_ARATH	CLC3_ARATH	APBLC_ARATH	COPB1_ARATH	BIG5_ARATH	Q9LVD7_ARATH	Q9SZR5_ARATH	B3H765_ARATH	A0A1P8B4C2_ARATH	Q8VXX0_ARATH	Q9SIJ7_ARATH	A1L4V1_ARATH	F4JUM1_ARATH	F4J6K6_ARATH	F4JXV9_ARATH	F4HYH6_ARATH	F4JX92_ARATH	F4HYH7_ARATH	F4JNZ8_ARATH
cellular_component	GO:0048046	apoplast	34	501	0.0678643	0.000597681	0.999669	0.042	1	SBT17_ARATH	GLTB1_ARATH	CPNB1_ARATH	BGA11_ARATH	DIR16_ARATH	CRK9_ARATH	FUCO1_ARATH	BGA14_ARATH	FLA8_ARATH	PAH2_ARATH	RETOL_ARATH	XYL2_ARATH	XTH26_ARATH	CRSP_ARATH	AED1_ARATH	CDR1_ARATH	DRL29_ARATH	EAF1B_ARATH	BGAL6_ARATH	GL11_ARATH	GL21_ARATH	GLGS_ARATH	GCSP1_ARATH	ADK1_ARATH	FTHS_ARATH	DIR18_ARATH	DIR24_ARATH	BGAL8_ARATH	BGAL4_ARATH	Q94CF4_ARATH	F4I3R1_ARATH	Q9M2U7_ARATH	F4IIQ3_ARATH	F4JUE3_ARATH
biological_process	GO:0009734	auxin-activated signaling pathway	34	268	0.126866	0.879139	0.160324	1	1	PLET1_ARATH	IAA32_ARATH	IAA9_ARATH	AIR12_ARATH	ARFC_ARATH	ARFL_ARATH	FKB42_ARATH	ARFU_ARATH	CMKMT_ARATH	ARFK_ARATH	ARFF_ARATH	ARFI_ARATH	PLET2_ARATH	ARFS_ARATH	ARFV_ARATH	VAB_ARATH	BIG_ARATH	2AAA_ARATH	ARFE_ARATH	ARFG_ARATH	NAC22_ARATH	ARFN_ARATH	ARFR_ARATH	AB1B_ARATH	ARFO_ARATH	Q8VY20_ARATH	Q9LUI0_ARATH	A0A1P8AZW3_ARATH	F4JXI3_ARATH	A0A1I9LTM9_ARATH	A0A2H1ZEC0_ARATH	A0A1I9LQ54_ARATH	F4K5M5_ARATH	A0A1P8AQ60_ARATH
molecular_function	GO:0003779	actin binding	34	103	0.330097	1	2.20763e-12	1	0	SCAR4_ARATH	FH14_ARATH	FH11_ARATH	FH1_ARATH	FH10_ARATH	FH6_ARATH	NET2D_ARATH	SCAR2_ARATH	NET2C_ARATH	ACAP1_ARATH	CIP1_ARATH	FH7_ARATH	A0A1P8BBH5_ARATH	A0A1P8BBE9_ARATH	A0A1P8AZE5_ARATH	Q29Q75_ARATH	A0A1P8AZD5_ARATH	A0A1P8AXI9_ARATH	F4JVZ5_ARATH	A0A1P8AXP2_ARATH	A0A1P8B7W9_ARATH	A0A1P8BBE5_ARATH	A0A1P8AZF4_ARATH	A0A1P8B303_ARATH	A0A1P8AZF2_ARATH	F4JT64_ARATH	F4ILN8_ARATH	A0A1P8AXI6_ARATH	A0A1P8AZG5_ARATH	A0A1P8BBE8_ARATH	A0A1P8B304_ARATH	A0A1P8BBE6_ARATH	A0A178UA95_ARATH	A0A1P8B2Y8_ARATH
molecular_function	GO:0042803	protein homodimerization activity	33	214	0.154206	0.956918	0.0643908	1	1	PHYA_ARATH	PHYB_ARATH	PHYC_ARATH	PHYD_ARATH	PHYE_ARATH	SERB1_ARATH	VCR_ARATH	VCS_ARATH	MOM1_ARATH	SPE1_ARATH	ANM13_ARATH	BH067_ARATH	BIODA_ARATH	DCP5L_ARATH	GNOM_ARATH	CKI1_ARATH	ATG11_ARATH	BRE1A_ARATH	BZP29_ARATH	BRE1B_ARATH	ANM14_ARATH	MORC6_ARATH	TAD1_ARATH	PYL1_ARATH	SPE2_ARATH	SEOB_ARATH	TGA9_ARATH	TGA10_ARATH	DMS3_ARATH	IF4B3_ARATH	AB11G_ARATH	A0A1P8AVD9_ARATH	A0A178VXX1_ARATH
cellular_component	GO:0005773	vacuole	33	332	0.0993976	0.00582985	0.99565	0.399	1	SYP22_ARATH	M3KE2_ARATH	BGA11_ARATH	DUS3L_ARATH	GALS2_ARATH	BGA14_ARATH	MIP3_ARATH	PLA2A_ARATH	SAHH1_ARATH	MIP2_ARATH	RETOL_ARATH	SAHH2_ARATH	SHGR2_ARATH	TBL39_ARATH	PTR2_ARATH	VA713_ARATH	RD19C_ARATH	AARE_ARATH	APA1_ARATH	APA2_ARATH	BGAL6_ARATH	GGH1_ARATH	GCSP2_ARATH	BGAL8_ARATH	AB27B_ARATH	BGAL4_ARATH	F4JXY6_ARATH	Q9LXZ7_ARATH	F4I3R1_ARATH	Q0WSL5_ARATH	Q9SRZ7_ARATH	O22787_ARATH	O82762_ARATH
molecular_function	GO:0042802	identical protein binding	33	210	0.157143	0.978964	0.0295927	1	1	PHYA_ARATH	PHYB_ARATH	PHYD_ARATH	SPA3_ARATH	TIF6B_ARATH	DRB1_ARATH	BZP63_ARATH	GNOM_ARATH	CSC1_ARATH	BRE1A_ARATH	FIPS5_ARATH	OEP37_ARATH	PRK6_ARATH	MTK_ARATH	PYL1_ARATH	SIRB_ARATH	PIF3_ARATH	RPS5_ARATH	STL1_ARATH	TGA5_ARATH	TSL_ARATH	TI10A_ARATH	Y1421_ARATH	BIM1_ARATH	BAME3_ARATH	AHK2_ARATH	ARFE_ARATH	GEX1_ARATH	MYO5_ARATH	ARFR_ARATH	DOG1_ARATH	BZP68_ARATH	BIM2_ARATH
molecular_function	GO:0030246	carbohydrate binding	33	381	0.0866142	0.00296031	0.998153	0.409	1	SD31_ARATH	LK111_ARATH	JAL41_ARATH	JAL42_ARATH	JAL18_ARATH	BGA11_ARATH	GUN19_ARATH	BGA14_ARATH	LRK42_ARATH	LRK12_ARATH	LRK11_ARATH	OS9_ARATH	PSL5_ARATH	Y1661_ARATH	XYL2_ARATH	LRK16_ARATH	LRK62_ARATH	LRK63_ARATH	LRK81_ARATH	JAL3_ARATH	B3GTJ_ARATH	BGAL8_ARATH	A0A2H1ZE50_ARATH	Q9LNW6_ARATH	Q9ZQ51_ARATH	F4IIQ3_ARATH	A0A1I9LTM6_ARATH	A0A1P8B326_ARATH	A0A1P8B3L0_ARATH	A0A1P8B357_ARATH	F4JUE3_ARATH	A0A1P8BAU5_ARATH	B3H4Y4_ARATH
molecular_function	GO:0061630	ubiquitin protein ligase activity	33	278	0.118705	0.546633	0.527543	1	1	RMR4_ARATH	ARI1_ARATH	ATL58_ARATH	ATL7_ARATH	C3H16_ARATH	RZF1_ARATH	UPL2_ARATH	VSR1_ARATH	UBE4_ARATH	PRT6_ARATH	UPL6_ARATH	VSR6_ARATH	UPL1_ARATH	Y4193_ARATH	RGLG1_ARATH	HAKAI_ARATH	BTSL1_ARATH	BTSL2_ARATH	ATL59_ARATH	ARI12_ARATH	Q9M9U8_ARATH	Q9LZR4_ARATH	Q94F54_ARATH	Q9M1Q0_ARATH	Q9CAJ8_ARATH	Q9M1F1_ARATH	Q9LZE2_ARATH	Q9FHS5_ARATH	Q4TU20_ARATH	F4ILG6_ARATH	A0A1P8BFH3_ARATH	F4JAP8_ARATH	B3H5A6_ARATH
cellular_component	GO:0005819	spindle	33	86	0.383721	1	8.17484e-11	1	0	RUK_ARATH	KN5B_ARATH	KN5A_ARATH	KN5C_ARATH	KN5D_ARATH	FH14_ARATH	KINUC_ARATH	GACP3_ARATH	MPS1_ARATH	KN14A_ARATH	FH6_ARATH	GACP4_ARATH	MB3R4_ARATH	TBG2_ARATH	TON2_ARATH	TBG1_ARATH	TPX2_ARATH	KN14C_ARATH	AUG1_ARATH	AUR1_ARATH	A0A1P8BE37_ARATH	Q9FM57_ARATH	Q9LDN6_ARATH	G3GBK1_ARATH	A0A1P8BGZ9_ARATH	F4K9T9_ARATH	A0A1P8BE61_ARATH	A0A1P8BE54_ARATH	A0A1P8BE62_ARATH	A0A1P8BE53_ARATH	A0A1P8BE82_ARATH	A0A1P8BE52_ARATH	A0A1P8BE57_ARATH
cellular_component	GO:0005802	trans-Golgi network	32	268	0.119403	0.677341	0.392625	1	1	UXT3_ARATH	SIPL1_ARATH	BIG4_ARATH	HLB1_ARATH	OFT15_ARATH	GRIP_ARATH	PMTQ_ARATH	GOS12_ARATH	MNS2_ARATH	SIK1_ARATH	STL1_ARATH	MGAT1_ARATH	PMTP_ARATH	PR1B2_ARATH	VSR1_ARATH	TR120_ARATH	VSR6_ARATH	TPST_ARATH	ZDH22_ARATH	UPS5_ARATH	PMTO_ARATH	CESA1_ARATH	BIG5_ARATH	COBL7_ARATH	Q9FF95_ARATH	Q9ASZ4_ARATH	F4KHR9_ARATH	Q9LK30_ARATH	Q9T069_ARATH	F4K8T6_ARATH	F4IKG5_ARATH	A8MQN4_ARATH
biological_process	GO:0030154	cell differentiation	32	186	0.172043	0.987833	0.0159867	1	1	SEP1_ARATH	SLK3_ARATH	SLK1_ARATH	FRL1A_ARATH	FES1_ARATH	FCA_ARATH	FPA_ARATH	AGL42_ARATH	AP3_ARATH	GATA3_ARATH	GATA6_ARATH	PIE1_ARATH	LUH_ARATH	LUMI_ARATH	SEUSS_ARATH	SEP2_ARATH	RHM1_ARATH	MSI4_ARATH	SCL6_ARATH	HUA2_ARATH	BAME3_ARATH	AGO1_ARATH	AGL71_ARATH	MYB36_ARATH	LEUNG_ARATH	GLYT7_ARATH	ANT_ARATH	GIGAN_ARATH	ATHB8_ARATH	EMF2_ARATH	Q501B0_ARATH	F4I2E4_ARATH
cellular_component	GO:0005789	endoplasmic reticulum membrane	31	547	0.0566728	4.41726e-08	1	0	1	SC24A_ARATH	HAP2_ARATH	HMDH1_ARATH	AHK3_ARATH	ERS1_ARATH	MIP3_ARATH	PMTR_ARATH	DMP3_ARATH	GOS12_ARATH	P4H6_ARATH	KCR1_ARATH	RHD32_ARATH	MEB1_ARATH	MIP2_ARATH	SAC8_ARATH	SC24B_ARATH	VAP13_ARATH	UFL1_ARATH	CDS2_ARATH	BAME3_ARATH	AHK2_ARATH	HMDH2_ARATH	ECA1_ARATH	FTIP3_ARATH	ALA2_ARATH	Q9M2L3_ARATH	Q8VXX0_ARATH	Q9SIJ7_ARATH	Q6NKR3_ARATH	F4JUM1_ARATH	A0A1P8B930_ARATH
biological_process	GO:0009414	response to water deprivation	31	315	0.0984127	0.346999	0.709864	1	1	RAP24_ARATH	M2K1_ARATH	AP2L1_ARATH	GTL1_ARATH	CESA8_ARATH	LEA7_ARATH	AZF2_ARATH	AHK3_ARATH	LUH_ARATH	SLAH3_ARATH	RZF1_ARATH	PARG1_ARATH	WRK33_ARATH	MBF1C_ARATH	AT18A_ARATH	BADH2_ARATH	ALDO4_ARATH	AHK2_ARATH	MYB29_ARATH	MYB76_ARATH	MYB96_ARATH	NFYA5_ARATH	LEUNG_ARATH	AB40G_ARATH	CMTA1_ARATH	ATHB7_ARATH	EF113_ARATH	AI5L6_ARATH	Q8L5Y2_ARATH	B3H7F6_ARATH	F4HRC9_ARATH
biological_process	GO:0006468	protein phosphorylation	31	283	0.109541	0.464733	0.58813	1	1	RIN4_ARATH	RUK_ARATH	SRF6_ARATH	SRF8_ARATH	CRLK2_ARATH	CRK2_ARATH	CDKE1_ARATH	KIPK2_ARATH	P4KA1_ARATH	PYRP2_ARATH	PERK9_ARATH	SIK1_ARATH	RKF3_ARATH	NIK2_ARATH	SRF4_ARATH	Y1661_ARATH	YAK1_ARATH	WNK4_ARATH	PV42B_ARATH	Y1864_ARATH	CDKG1_ARATH	PERK8_ARATH	BIK1_ARATH	Q9FKV9_ARATH	Q8H0Z0_ARATH	Q9LNN0_ARATH	Q9LMK8_ARATH	Q8L7V7_ARATH	Q9LRY7_ARATH	Q9LZS4_ARATH	F4I854_ARATH
cellular_component	GO:0005856	cytoskeleton	31	119	0.260504	1	1.29191e-27	1	0	SCAR4_ARATH	SCARL_ARATH	SEC3A_ARATH	M3KE2_ARATH	IQD17_ARATH	IQD19_ARATH	IQD29_ARATH	IQD18_ARATH	NET1A_ARATH	IQD11_ARATH	IQD26_ARATH	BECN1_ARATH	SCAR2_ARATH	VILI2_ARATH	VILI1_ARATH	IQD14_ARATH	E70A1_ARATH	CIP1_ARATH	A0A1P8B4R2_ARATH	A0A1P8BBH5_ARATH	A0A1P8BBE9_ARATH	Q9LZZ5_ARATH	Q29Q75_ARATH	A0A1P8B4S1_ARATH	A0A1P8B4T4_ARATH	A0A1P8BBE5_ARATH	F4JT64_ARATH	A0A1P8B4R7_ARATH	A0A1P8BBE8_ARATH	A0A1P8BBE6_ARATH	A0A178UA95_ARATH
biological_process	GO:0009611	response to wounding	31	197	0.15736	0.987887	0.0193742	1	1	RAP24_ARATH	RENT1_ARATH	TIF4A_ARATH	TIF4B_ARATH	TIF6B_ARATH	M2K1_ARATH	M3K1_ARATH	GLR34_ARATH	LOX4_ARATH	LOX3_ARATH	GSO1_ARATH	LUH_ARATH	PLA12_ARATH	CHI5_ARATH	PERK1_ARATH	RENT3_ARATH	SPE2_ARATH	PRB1_ARATH	LOX6_ARATH	SYD_ARATH	TI10A_ARATH	MY102_ARATH	NAC96_ARATH	MYB29_ARATH	MYB76_ARATH	MYC2_ARATH	LEUNG_ARATH	DOF11_ARATH	AB11G_ARATH	Q2V4Q1_ARATH	F4HPR9_ARATH
molecular_function	GO:0005509	calcium ion binding	31	366	0.0846995	0.024943	0.983834	0.987	1	RBOHF_ARATH	RSA1_ARATH	CDPKT_ARATH	NDB2_ARATH	PLA2A_ARATH	MNS2_ARATH	WAKLB_ARATH	EHD1_ARATH	VSR1_ARATH	WAKLD_ARATH	TON2_ARATH	WAKLH_ARATH	WAK1_ARATH	VSR6_ARATH	WAKLG_ARATH	NDB4_ARATH	DEX1_ARATH	A0A1P8AWN7_ARATH	Q9LM78_ARATH	Q9FNI2_ARATH	Q9FNN0_ARATH	A0A1P8AXY9_ARATH	F4JJY3_ARATH	A0A1P8B0P3_ARATH	A0A1P8AQ08_ARATH	F4HY32_ARATH	F4HY33_ARATH	A0A1P8AP07_ARATH	A0A1I9LRE8_ARATH	A0A1P8APZ6_ARATH	F4JGL5_ARATH
cellular_component	GO:0031225	anchored component of membrane	30	261	0.114943	0.277485	0.779092	1	1	PLY12_ARATH	AIR12_ARATH	COBL8_ARATH	CRRS6_ARATH	HIPL2_ARATH	LTG15_ARATH	GPDL4_ARATH	FLA8_ARATH	COBL2_ARATH	GPDL3_ARATH	FLA9_ARATH	LTG26_ARATH	LTG24_ARATH	LTG22_ARATH	COBL4_ARATH	COBL6_ARATH	FLA11_ARATH	LTG10_ARATH	E1313_ARATH	E133_ARATH	COBL1_ARATH	AGP27_ARATH	COBL7_ARATH	A0A1P8BE86_ARATH	Q9M8R6_ARATH	Q8VYN5_ARATH	A0A1P8BE64_ARATH	A0A178UK60_ARATH	A0A1P8AU31_ARATH	F4JLB7_ARATH
biological_process	GO:0009733	response to auxin	30	251	0.119522	0.659493	0.393682	1	1	IAA32_ARATH	IAA9_ARATH	ARFC_ARATH	DRB1_ARATH	CMKMT_ARATH	ARFF_ARATH	E2FB_ARATH	ELF3_ARATH	PEX5_ARATH	LUH_ARATH	ARFS_ARATH	SEUSS_ARATH	SAG12_ARATH	TCP3_ARATH	WRK23_ARATH	TPST_ARATH	VAB_ARATH	BIG_ARATH	AGO1_ARATH	ARFE_ARATH	ARFG_ARATH	MYB30_ARATH	MYB96_ARATH	LEUNG_ARATH	ABI3_ARATH	AB1B_ARATH	CMTA1_ARATH	ATHB8_ARATH	Q84TG2_ARATH	Q8GZ96_ARATH
cellular_component	GO:0009535	chloroplast thylakoid membrane	30	446	0.0672646	0.000815108	0.999559	0.057	1	TIC40_ARATH	PSBD_ARATH	SCY2_ARATH	MFP1_ARATH	EGY2_ARATH	KEA3_ARATH	ALB4_ARATH	ANTR1_ARATH	PAM71_ARATH	FTSH5_ARATH	RK4_ARATH	ATPA_ARATH	TI205_ARATH	PAO_ARATH	STR4_ARATH	TI100_ARATH	TATB_ARATH	ZIP4_ARATH	TL15A_ARATH	RR6_ARATH	IRT3_ARATH	CLPP4_ARATH	AB1K7_ARATH	FTSH1_ARATH	Q8RXT7_ARATH	Q42139_ARATH	Q8RWI0_ARATH	Q93VT6_ARATH	Q8L475_ARATH	F4K452_ARATH
biological_process	GO:0006511	ubiquitin-dependent protein catabolic process	30	289	0.103806	0.938236	0.0787257	1	1	RMR4_ARATH	ARI1_ARATH	ATL58_ARATH	ATL7_ARATH	DSK2B_ARATH	DSK2A_ARATH	UBP15_ARATH	PSA6A_ARATH	UBP4_ARATH	PSA6B_ARATH	VSR1_ARATH	UBE4_ARATH	UBP27_ARATH	PRT6_ARATH	UPL6_ARATH	VSR6_ARATH	UBP18_ARATH	BTSL1_ARATH	BTSL2_ARATH	ATL59_ARATH	ARI12_ARATH	F4IJH1_ARATH	F4IIA5_ARATH	A0A1P8B073_ARATH	Q9M1F1_ARATH	Q9FHS5_ARATH	A0A2H1ZEQ5_ARATH	F4I642_ARATH	F4JVD6_ARATH	A0A1P8AYX2_ARATH
molecular_function	GO:0016757	glycosyltransferase activity	30	306	0.0980392	0.000270474	0.999829	0.035	1	TPS5_ARATH	OFT15_ARATH	GALS2_ARATH	GALS3_ARATH	B3GT5_ARATH	MGP4_ARATH	OFUT8_ARATH	RFS2_ARATH	STL1_ARATH	MGAT1_ARATH	Y1720_ARATH	GLYT7_ARATH	B3GT7_ARATH	B3GTJ_ARATH	FTIP3_ARATH	O22225_ARATH	Q9LSB5_ARATH	Q9SZU2_ARATH	Q6NKR6_ARATH	Q9M9C3_ARATH	Q1G2Z9_ARATH	Q0WWD8_ARATH	Q1G300_ARATH	Q9SSP6_ARATH	Q494P1_ARATH	A0A1P8AT04_ARATH	B3H6X4_ARATH	A0A1P8ASZ1_ARATH	A0A1P8ASV0_ARATH	A0A1P8ASW3_ARATH
molecular_function	GO:0016740	transferase activity	29	357	0.0812325	0.0226831	0.979718	0.982	1	RUK_ARATH	ATL38_ARATH	ATL3_ARATH	RGLG5_ARATH	SIR1_ARATH	SAE2_ARATH	RHY1A_ARATH	ATL48_ARATH	ATL17_ARATH	ATL29_ARATH	A8MRG4_ARATH	Q9FF95_ARATH	Q9M2C6_ARATH	O80829_ARATH	Q9FGD5_ARATH	F4KHR9_ARATH	F4I526_ARATH	F4J8A2_ARATH	Q147R7_ARATH	Q84JY3_ARATH	Q9FNQ6_ARATH	A0A1P8B4G3_ARATH	F4IM97_ARATH	A8MS23_ARATH	A0A1P8B0J1_ARATH	A0A1I9LSR7_ARATH	F4J6R4_ARATH	A0A1I9LMH8_ARATH	F4IMR0_ARATH
molecular_function	GO:0004519	endonuclease activity	29	125	0.232	0.999155	0.00144499	1	0.542	CPSF_ARATH	POLR2_ARATH	MORC6_ARATH	POLR1_ARATH	ENDO2_ARATH	A0A1P8AX44_ARATH	Q9FIC2_ARATH	A0A1P8BCJ1_ARATH	Q84N39_ARATH	Q9SS53_ARATH	A0A1P8BCI5_ARATH	Q9M1Q4_ARATH	F4K209_ARATH	A0A1P8AMZ6_ARATH	A0A1P8BAA2_ARATH	A0A1P8BCJ8_ARATH	A0A1P8B5S6_ARATH	A0A1P8AZ51_ARATH	F4HNV0_ARATH	A0A1P8B5S9_ARATH	A0A1P8BCJ7_ARATH	F4IRT2_ARATH	A0A1P8BCI2_ARATH	A0A1P8BCK2_ARATH	A0A1P8B5S2_ARATH	A0A1P8BCH6_ARATH	F4I9U0_ARATH	A0A1P8BCL2_ARATH	F4JYU0_ARATH
biological_process	GO:0016192	vesicle-mediated transport	29	200	0.145	0.999995	7.56875e-06	1	0.006	AGD7_ARATH	APBLB_ARATH	HLB1_ARATH	GNOM_ARATH	APBLA_ARATH	MIP3_ARATH	ESP1_ARATH	SNX2B_ARATH	VA722_ARATH	PR1B3_ARATH	PR1B2_ARATH	VPS51_ARATH	VA713_ARATH	AGD6_ARATH	APBLC_ARATH	BIG5_ARATH	Q9ASZ4_ARATH	A0A1P8B4C2_ARATH	B9DH97_ARATH	F4J6K6_ARATH	F4JXV9_ARATH	A0A1P8B9G8_ARATH	A0A1P8B9I5_ARATH	A0A1P8B9H5_ARATH	A0A1P8AY33_ARATH	A0A1P8BEB3_ARATH	A0A1P8B773_ARATH	F4IVQ2_ARATH	F4JNZ8_ARATH
molecular_function	GO:0051015	actin filament binding	28	90	0.311111	1	8.4666e-07	1	0	FIMB5_ARATH	MYO10_ARATH	NET1A_ARATH	NET1D_ARATH	GEX2_ARATH	FH14_ARATH	FH1_ARATH	P4KA1_ARATH	MYO12_ARATH	MYO13_ARATH	NET1B_ARATH	NET1C_ARATH	VILI2_ARATH	VILI3_ARATH	VILI1_ARATH	MYO5_ARATH	MYO7_ARATH	A0A1P8BC45_ARATH	W0TY53_ARATH	Q9C6F8_ARATH	A0A1P8BC26_ARATH	A0A1P8BC34_ARATH	A0A1P8BC40_ARATH	A0A1P8BC31_ARATH	A0A1P8BC47_ARATH	A0A1P8AZB7_ARATH	F4ILN8_ARATH	Q2V445_ARATH
biological_process	GO:0009409	response to cold	27	319	0.0846395	0.221417	0.823514	1	1	PHYB_ARATH	RBG3_ARATH	RAP24_ARATH	PME41_ARATH	SPE1_ARATH	M2K2_ARATH	M3K1_ARATH	CPNB1_ARATH	CMKMT_ARATH	AHK3_ARATH	ELF3_ARATH	ATPA_ARATH	RH53_ARATH	SPE2_ARATH	TATB_ARATH	WRK33_ARATH	WRK25_ARATH	VIN3_ARATH	ICE1_ARATH	MYB96_ARATH	AB40G_ARATH	DOF25_ARATH	CMTA2_ARATH	CMTA3_ARATH	GIGAN_ARATH	EF2_ARATH	F4JAF3_ARATH
biological_process	GO:0009555	pollen development	27	235	0.114894	0.89681	0.134952	1	1	NPG1_ARATH	RTEL1_ARATH	RUK_ARATH	IAA32_ARATH	LOX4_ARATH	KPL_ARATH	FAB1A_ARATH	FAB1B_ARATH	P4KA1_ARATH	FAS1_ARATH	LOX3_ARATH	LRK42_ARATH	LBD27_ARATH	MLH1_ARATH	TI10A_ARATH	WRK35_ARATH	ACA9_ARATH	GEX1_ARATH	AB25B_ARATH	ASHH2_ARATH	CALS5_ARATH	F4HY32_ARATH	F4J0P2_ARATH	F4IIX4_ARATH	F4I9G5_ARATH	F4HU48_ARATH	F4JHM9_ARATH
molecular_function	GO:0042626	ATPase-coupled transmembrane transporter activity	27	74	0.364865	1	3.6563e-08	1	0	AB14B_ARATH	AB14G_ARATH	AB15B_ARATH	AB5A_ARATH	AB5B_ARATH	AB2D_ARATH	AB12B_ARATH	AB13B_ARATH	AB22B_ARATH	AB17B_ARATH	AB2B_ARATH	AB40G_ARATH	AB9C_ARATH	AB25B_ARATH	AB1B_ARATH	AB1D_ARATH	AB16B_ARATH	AB7B_ARATH	AB11B_ARATH	AB18B_ARATH	AB30G_ARATH	AB31G_ARATH	AB6B_ARATH	AB20B_ARATH	AB23B_ARATH	AB27B_ARATH	F4JJ27_ARATH
biological_process	GO:0055085	transmembrane transport	25	114	0.219298	0.0362624	0.972999	1	1	AB14B_ARATH	AB15B_ARATH	AB5B_ARATH	AB12B_ARATH	AB13B_ARATH	AB22B_ARATH	AB17B_ARATH	AB2B_ARATH	AB40G_ARATH	AB9C_ARATH	AB25B_ARATH	AB1B_ARATH	AB16B_ARATH	AB7B_ARATH	AB11B_ARATH	AB11G_ARATH	AB18B_ARATH	AB30G_ARATH	AB31G_ARATH	AB23B_ARATH	AB27B_ARATH	Q949U9_ARATH	Q9S710_ARATH	A0A1P8B9P4_ARATH	A0A1P8BHB5_ARATH
biological_process	GO:0046777	protein autophosphorylation	25	172	0.145349	0.884485	0.16486	1	1	PDPK1_ARATH	CKL4_ARATH	M3K1_ARATH	M3KE2_ARATH	CDPKT_ARATH	HT1_ARATH	CRK2_ARATH	MPS1_ARATH	RLK5_ARATH	PERK1_ARATH	SIK1_ARATH	THE1_ARATH	WAKLB_ARATH	Y2214_ARATH	Y5613_ARATH	YAK1_ARATH	Y3037_ARATH	WNK4_ARATH	Y2278_ARATH	BIK1_ARATH	ATG1B_ARATH	ATG1C_ARATH	A0A178US29_ARATH	Q9LYS5_ARATH	F4HXP0_ARATH
biological_process	GO:0032259	methylation	25	340	0.0735294	0.183183	0.850872	1	1	CMKMT_ARATH	GXM3_ARATH	PMTC_ARATH	PMTQ_ARATH	PMTR_ARATH	PMTP_ARATH	PMTA_ARATH	PMTO_ARATH	A0A1P8B0G7_ARATH	C0Z305_ARATH	B3H6T0_ARATH	Q9LK30_ARATH	Q9CAQ3_ARATH	Q9CAQ4_ARATH	Q9LZS1_ARATH	Q93VT6_ARATH	Q6NQA0_ARATH	Q9FKS3_ARATH	F4IST0_ARATH	A0A1I9LMQ3_ARATH	A0A1P8B0Z8_ARATH	F4I824_ARATH	F4HVA0_ARATH	A0A1R7T3F9_ARATH	F4IST1_ARATH
molecular_function	GO:0043130	ubiquitin binding	25	87	0.287356	0.999994	1.90343e-05	1	0.006	FREE1_ARATH	DA1_ARATH	PUX6_ARATH	TOL7_ARATH	TOL5_ARATH	TOL6_ARATH	TOL9_ARATH	RD23A_ARATH	RD23B_ARATH	RD23C_ARATH	CID6_ARATH	BRO1_ARATH	DAR6_ARATH	O65506_ARATH	Q8H1Q3_ARATH	Q8RWY8_ARATH	C0Z2E4_ARATH	Q9M0W4_ARATH	A0A1P8B8V4_ARATH	F4JV51_ARATH	A0A1P8AW31_ARATH	F4JI85_ARATH	F4IF85_ARATH	F4IF83_ARATH	F4KED5_ARATH
cellular_component	GO:0005654	nucleoplasm	25	162	0.154321	0.999924	0.000124589	1	0.025	RBLOT_ARATH	CPSF_ARATH	DET1_ARATH	CRWN4_ARATH	SEUSS_ARATH	SF1_ARATH	THG1_ARATH	THG2_ARATH	Y14_ARATH	TNPO1_ARATH	VIR_ARATH	TPX2_ARATH	RD23A_ARATH	RD23B_ARATH	RD23C_ARATH	ASY1_ARATH	GIGAN_ARATH	ALY2_ARATH	ALY1_ARATH	F4IGS5_ARATH	Q9M0W4_ARATH	A0A1P8AW31_ARATH	F4JI85_ARATH	F4IF85_ARATH	F4IF83_ARATH
biological_process	GO:0030036	actin cytoskeleton organization	25	43	0.581395	1	1.62592e-09	1	0	SCAR4_ARATH	PIR_ARATH	SCARL_ARATH	FIMB5_ARATH	GEX2_ARATH	FH1_ARATH	SCAR2_ARATH	ACAP1_ARATH	A0A1P8BC45_ARATH	A0A1P8B4R2_ARATH	A0A1P8BBH5_ARATH	A0A1P8BBE9_ARATH	W0TY53_ARATH	A0A1P8BC26_ARATH	A0A1P8BC34_ARATH	A0A1P8B4S1_ARATH	A0A1P8BC40_ARATH	A0A1P8B4T4_ARATH	A0A1P8BBE5_ARATH	A0A1P8BC31_ARATH	A0A1P8BC47_ARATH	A0A1P8B4R7_ARATH	A0A1P8BBE8_ARATH	A0A1P8BBE6_ARATH	A0A178UA95_ARATH
biological_process	GO:0048364	root development	24	180	0.133333	0.470685	0.579752	1	1	RTEL1_ARATH	PLET1_ARATH	NOV_ARATH	MED16_ARATH	GTE4_ARATH	KINUA_ARATH	P4KA1_ARATH	PERK4_ARATH	MCM2_ARATH	PLET2_ARATH	PRP16_ARATH	PLDZ1_ARATH	ZWIP6_ARATH	BIG_ARATH	AHL18_ARATH	ARFE_ARATH	MYB61_ARATH	AB25B_ARATH	A0A1I9LP88_ARATH	F4I642_ARATH	F4ILG6_ARATH	F4IC87_ARATH	F4KGM7_ARATH	F4KGW7_ARATH
cellular_component	GO:0009524	phragmoplast	24	104	0.230769	0.99985	0.000387102	1	0.082	RUK_ARATH	SEC3A_ARATH	KN12A_ARATH	IQD5_ARATH	IQD8_ARATH	KN12B_ARATH	FH14_ARATH	KINUC_ARATH	KN14A_ARATH	FH6_ARATH	MB3R4_ARATH	IQD7_ARATH	TANB_ARATH	TON2_ARATH	TPX2_ARATH	KN14C_ARATH	AUG1_ARATH	KN12C_ARATH	KN12D_ARATH	KN14D_ARATH	E70A1_ARATH	CLASP_ARATH	AUR1_ARATH	Q9SHI0_ARATH
molecular_function	GO:0004190	aspartic-type endopeptidase activity	24	115	0.208696	0.99834	0.00351274	1	0.908	POLR2_ARATH	POLR1_ARATH	AED1_ARATH	APA1_ARATH	APA2_ARATH	APA3_ARATH	CDR1_ARATH	A0A178VI02_ARATH	Q9LZW6_ARATH	Q0WRU5_ARATH	Q9M8R6_ARATH	A0A1P8AVE7_ARATH	Q9M2U7_ARATH	Q9FGI3_ARATH	Q9SCT5_ARATH	Q8LCW1_ARATH	Q9XIR2_ARATH	Q9FHE2_ARATH	F4JIY9_ARATH	A0A1P8AVH3_ARATH	F4JGD2_ARATH	A0A1P8AV08_ARATH	F4K5B9_ARATH	A0A1P8AVA7_ARATH
biological_process	GO:0006970	response to osmotic stress	24	143	0.167832	0.399809	0.651199	1	1	RBOHI_ARATH	RAP24_ARATH	M3K1_ARATH	CESA8_ARATH	CMKMT_ARATH	MED16_ARATH	AHK3_ARATH	PTN2B_ARATH	PIAL1_ARATH	SPE2_ARATH	RZF1_ARATH	PUM5_ARATH	VP53A_ARATH	PARG1_ARATH	WRK33_ARATH	WRK25_ARATH	TTL1_ARATH	PIAL2_ARATH	WRK70_ARATH	AT18A_ARATH	AHK2_ARATH	MY102_ARATH	CIP1_ARATH	Q9LRX5_ARATH
biological_process	GO:0008380	RNA splicing	24	120	0.2	0.854606	0.182415	1	1	RENT1_ARATH	CYP63_ARATH	ATM_ARATH	PRP43_ARATH	SMU1_ARATH	SKIP_ARATH	SAC3A_ARATH	SF1_ARATH	PRP16_ARATH	THOC2_ARATH	Y14_ARATH	RNC1_ARATH	THO5A_ARATH	VIR_ARATH	DEXHE_ARATH	DEAH2_ARATH	DEAH4_ARATH	DEAH6_ARATH	ESP3_ARATH	Q9LZT6_ARATH	A0A1I9LLI6_ARATH	F4JC80_ARATH	F4JAF3_ARATH	A0A1I9LLI5_ARATH
molecular_function	GO:0003713	transcription coactivator activity	24	64	0.375	1	3.10189e-08	1	0	TAF9_ARATH	HAC1_ARATH	HAC4_ARATH	HAC5_ARATH	GAI_ARATH	HAC12_ARATH	LUH_ARATH	MED6_ARATH	MED25_ARATH	MBF1B_ARATH	MD20B_ARATH	MBF1A_ARATH	MBF1C_ARATH	MD20A_ARATH	MD15A_ARATH	MD15C_ARATH	GIF1_ARATH	A0A1P8AQ17_ARATH	Q9LMQ5_ARATH	Q9SK61_ARATH	A0A1R7T3A9_ARATH	A0A1P8AQ03_ARATH	A0A1P8AVD7_ARATH	A0A1P8AV92_ARATH
biological_process	GO:0006310	DNA recombination	23	64	0.359375	1	1.59617e-08	1	0	RECA3_ARATH	RTEL1_ARATH	RECQ2_ARATH	POLR2_ARATH	FAS1_ARATH	RECA4_ARATH	DNLI1_ARATH	PDS5B_ARATH	RECAM_ARATH	RQL1_ARATH	RQL3_ARATH	NSE4B_ARATH	POLR1_ARATH	DNLI4_ARATH	BRCA1_ARATH	CHR24_ARATH	A0A1P8AV94_ARATH	A0A1P8AV97_ARATH	A0A1P8AV65_ARATH	A0A1P8AV98_ARATH	A0A1P8AVA5_ARATH	A0A1I9LR97_ARATH	A0A1P8BHE2_ARATH
molecular_function	GO:0005525	GTP binding	23	401	0.0573566	2.72938e-05	0.999988	0.002	1	IAN4_ARATH	DGP2_ARATH	RHD32_ARATH	THG1_ARATH	THG2_ARATH	EHD1_ARATH	TBG2_ARATH	TC120_ARATH	TOC90_ARATH	TBG1_ARATH	LIIP2_ARATH	DRP1D_ARATH	EF2_ARATH	A0A1P8BFE6_ARATH	B9DFA5_ARATH	F4KI84_ARATH	Q9ASU6_ARATH	Q8W4K6_ARATH	A0A1P8B2C6_ARATH	F4JCC8_ARATH	F4KFX1_ARATH	F4I3J0_ARATH	A0A1P8BFF4_ARATH
molecular_function	GO:0003774	cytoskeletal motor activity	23	54	0.425926	1	6.8409e-29	1	0	MYO10_ARATH	MYO12_ARATH	MYO13_ARATH	MYO5_ARATH	MYO7_ARATH	A0A1P8AZE5_ARATH	A0A1P8AVE6_ARATH	A0A1P8AZD5_ARATH	A0A1P8AXI9_ARATH	F4JVZ5_ARATH	A0A1P8AXP2_ARATH	A0A1P8AVE8_ARATH	A0A1P8AZF4_ARATH	A0A178UBX1_ARATH	A0A1P8AN92_ARATH	A0A1P8B303_ARATH	A0A1P8AZF2_ARATH	A0A1P8AXI6_ARATH	A0A1P8AZG5_ARATH	A0A1P8B304_ARATH	A0A1P8AVA1_ARATH	A0A2H1ZEB7_ARATH	A0A1P8B2Y8_ARATH
molecular_function	GO:0003678	DNA helicase activity	22	61	0.360656	1	1.428e-09	1	0	RTEL1_ARATH	DDM1_ARATH	PIE1_ARATH	MCM2_ARATH	MCM6_ARATH	BRM_ARATH	HVT1_ARATH	A0A1P8APW8_ARATH	A0A1P8AV25_ARATH	A0A1P8AQ29_ARATH	A0A1P8AQ53_ARATH	F4IHC3_ARATH	A0A1P8AV97_ARATH	Q9CA92_ARATH	A0A1P8AQ45_ARATH	A0A1P8AV65_ARATH	F4HUN8_ARATH	A0A1P8AV98_ARATH	F4HPK7_ARATH	A0A1I9LR97_ARATH	A0A1P8APW6_ARATH	F4HUN4_ARATH
biological_process	GO:0009909	regulation of flower development	22	85	0.258824	0.999591	0.000865018	1	0.654	ANM13_ARATH	MED8_ARATH	AHK3_ARATH	AGL42_ARATH	ELF3_ARATH	LUH_ARATH	ANM14_ARATH	SEUSS_ARATH	PAN_ARATH	MED25_ARATH	AHK2_ARATH	AGL71_ARATH	LEUNG_ARATH	FD_ARATH	EAF1A_ARATH	EAF1B_ARATH	EMF1_ARATH	Q147F4_ARATH	Q9FMF3_ARATH	Q5Q0A4_ARATH	Q67ZF8_ARATH	F4KEP6_ARATH
molecular_function	GO:0042393	histone binding	22	92	0.23913	0.999724	0.000657522	1	0.286	INO80_ARATH	MSI5_ARATH	FAS1_ARATH	PIE1_ARATH	SSRP1_ARATH	MSI4_ARATH	SYD_ARATH	MBD9_ARATH	IDM1_ARATH	AGDP1_ARATH	C3H19_ARATH	F4IKF3_ARATH	F4K4G6_ARATH	F4JXC7_ARATH	Q8RWG0_ARATH	Q9LIM2_ARATH	Q9M2S1_ARATH	Q9T073_ARATH	Q0WKW1_ARATH	A0A178VTI3_ARATH	F4J277_ARATH	A0A1P8B2Y3_ARATH
biological_process	GO:0006260	DNA replication	22	70	0.314286	1	1.74915e-08	1	0	RTEL1_ARATH	JHS1_ARATH	BH140_ARATH	FAS1_ARATH	DNLI1_ARATH	POLK_ARATH	SSRP1_ARATH	POLH_ARATH	REV3_ARATH	RFA2A_ARATH	RFA2B_ARATH	MCMBP_ARATH	DNLI4_ARATH	A0A1P8AMQ2_ARATH	A0A1P8AV94_ARATH	F4HTM5_ARATH	A0A1P8AMM8_ARATH	F4IYI1_ARATH	F4KBP3_ARATH	F4KHP4_ARATH	A0A1P8AVA5_ARATH	A0A1P8AMN7_ARATH
biological_process	GO:0010228	vegetative to reproductive phase transition of meristem	21	112	0.1875	0.984204	0.0247923	1	1	AK10B_ARATH	ANM13_ARATH	FPA_ARATH	BRE1A_ARATH	BRE1B_ARATH	ANM14_ARATH	LUMI_ARATH	BLH8_ARATH	SKIP_ARATH	SSRP1_ARATH	RLT1_ARATH	AHL18_ARATH	BAG6_ARATH	DEXHC_ARATH	ATA15_ARATH	AHL22_ARATH	ATXR3_ARATH	EDM2_ARATH	F4JY25_ARATH	F4J277_ARATH	F4JAV9_ARATH
biological_process	GO:0006979	response to oxidative stress	21	294	0.0714286	0.0142917	0.990515	0.998	1	PER61_ARATH	PER12_ARATH	SPE1_ARATH	CPSF_ARATH	NDUAC_ARATH	LUH_ARATH	SEUSS_ARATH	SIRB_ARATH	RETOL_ARATH	SPE2_ARATH	RFS2_ARATH	PARG1_ARATH	XPF_ARATH	ARS1_ARATH	AT18A_ARATH	LEUNG_ARATH	AB1K7_ARATH	Q9FK37_ARATH	B3H7F6_ARATH	F4I3C3_ARATH	F4K452_ARATH
biological_process	GO:0006629	lipid metabolic process	21	167	0.125749	2.4154e-08	1	0	1	GPDL4_ARATH	GPDL3_ARATH	PTN2B_ARATH	PAH2_ARATH	PKP1_ARATH	PAH1_ARATH	APA1_ARATH	APA2_ARATH	APA3_ARATH	APG_ARATH	Q0WQ61_ARATH	Q9LZW6_ARATH	A0A1P8AVE7_ARATH	Q9SCT5_ARATH	F4HSP7_ARATH	A0A1P8AVH3_ARATH	F4JGD2_ARATH	A0A1P8AU29_ARATH	A0A1P8AV08_ARATH	A8MRJ1_ARATH	A0A1P8AVA7_ARATH
biological_process	GO:0009873	ethylene-activated signaling pathway	21	192	0.109375	0.778941	0.287185	1	1	RBOHF_ARATH	RAP24_ARATH	TRP1_ARATH	PLET1_ARATH	AP2L1_ARATH	ERF03_ARATH	ERF62_ARATH	ERF55_ARATH	PLET2_ARATH	RAP23_ARATH	SIR1_ARATH	SYD_ARATH	WRK70_ARATH	MBF1C_ARATH	2AAA_ARATH	AIL6_ARATH	AIL7_ARATH	EF113_ARATH	EF115_ARATH	ERF86_ARATH	G8IQH2_ARATH
biological_process	GO:0007015	actin filament organization	21	72	0.291667	0.999754	0.000538203	1	0.459	MYO10_ARATH	MYO12_ARATH	MYO13_ARATH	MYO5_ARATH	MYO7_ARATH	JAC1_ARATH	A0A1P8AZE5_ARATH	A0A1P8AZD5_ARATH	A0A1P8AXI9_ARATH	F4JVZ5_ARATH	A0A1P8AXP2_ARATH	A0A1P8AZF4_ARATH	A0A1P8B303_ARATH	A0A1P8AZF2_ARATH	A0A1P8AZB7_ARATH	F4ILN8_ARATH	Q2V445_ARATH	A0A1P8AXI6_ARATH	A0A1P8AZG5_ARATH	A0A1P8B304_ARATH	A0A1P8B2Y8_ARATH
biological_process	GO:0010150	leaf senescence	20	111	0.18018	0.991581	0.0151956	1	1	LRP1B_ARATH	LRP1C_ARATH	AHK3_ARATH	AGL42_ARATH	ATG11_ARATH	ATG7_ARATH	RIN13_ARATH	SAG12_ARATH	UBA2A_ARATH	TCP3_ARATH	WRK30_ARATH	TCP10_ARATH	WRK53_ARATH	UBA2C_ARATH	WRK70_ARATH	TBL17_ARATH	UBA2B_ARATH	ATA15_ARATH	AT18A_ARATH	CMTA3_ARATH
molecular_function	GO:0000287	magnesium ion binding	20	198	0.10101	0.271062	0.79972	1	1	LINS_ARATH	BIODA_ARATH	THG1_ARATH	PKP1_ARATH	THG2_ARATH	MTBC_ARATH	TPS05_ARATH	HIS1A_ARATH	ALA2_ARATH	ALA5_ARATH	F4HVE4_ARATH	A0A1P8BAY5_ARATH	Q9SJQ0_ARATH	A8MR07_ARATH	Q94KE3_ARATH	A0A1P8B2C6_ARATH	F4K8T6_ARATH	A0A1P8BAY8_ARATH	A0A1P8B0J1_ARATH	A0A178UQC1_ARATH
molecular_function	GO:0008168	methyltransferase activity	20	270	0.0740741	0.00686572	0.995424	0.734	1	NOP2C_ARATH	PMTC_ARATH	PMTQ_ARATH	PMTR_ARATH	PMTP_ARATH	PMTA_ARATH	PMTO_ARATH	C0Z305_ARATH	Q9LK30_ARATH	Q9LZS1_ARATH	Q93VT6_ARATH	Q6NQA0_ARATH	Q9FKS3_ARATH	F4IST0_ARATH	A0A1I9LMQ3_ARATH	A0A1P8B0Z8_ARATH	F4I824_ARATH	F4HVA0_ARATH	A0A1R7T3F9_ARATH	F4IST1_ARATH
biological_process	GO:0045892	negative regulation of transcription, DNA-templated	20	169	0.118343	0.687096	0.382513	1	1	PHYB_ARATH	C3H65_ARATH	CTF64_ARATH	CTF77_ARATH	GTL1_ARATH	AZF2_ARATH	LUH_ARATH	SPER2_ARATH	RLT1_ARATH	WRK27_ARATH	Y4919_ARATH	WRK70_ARATH	ARS1_ARATH	ICE1_ARATH	MYB36_ARATH	NFYA5_ARATH	LEUNG_ARATH	EMF1_ARATH	Q1G3W7_ARATH	Q0WKW1_ARATH
molecular_function	GO:0051539	4 iron, 4 sulfur cluster binding	20	124	0.16129	0.944693	0.090034	1	1	NAR1_ARATH	RTEL1_ARATH	HF101_ARATH	JHS1_ARATH	CK5P1_ARATH	DML2_ARATH	DML3_ARATH	DME_ARATH	SIRB_ARATH	ROS1_ARATH	REV3_ARATH	PRI2_ARATH	F4HTM5_ARATH	A0A1P8AMM8_ARATH	Q9FMJ4_ARATH	F4HRU9_ARATH	A0A1P8ASU0_ARATH	A0A1P8AMN7_ARATH	F4HXR5_ARATH	F4HRU7_ARATH
biological_process	GO:0009658	chloroplast organization	20	190	0.105263	0.479497	0.598247	1	1	TIC40_ARATH	SCY2_ARATH	STY8_ARATH	FB348_ARATH	KEA3_ARATH	ALB4_ARATH	CDP1_ARATH	KEA1_ARATH	PPR45_ARATH	PP451_ARATH	STY17_ARATH	TI100_ARATH	OEP80_ARATH	AB25B_ARATH	CLPP4_ARATH	Q9C7J5_ARATH	Q9LYL4_ARATH	A8MQH6_ARATH	Q9SX62_ARATH	F4JHE9_ARATH
biological_process	GO:0007049	cell cycle	20	188	0.106383	1	2.21745e-12	1	0	PATH1_ARATH	SPC25_ARATH	REC2_ARATH	CDC24_ARATH	M3KE2_ARATH	CDKE1_ARATH	CDC21_ARATH	CD203_ARATH	FZR1_ARATH	FZR3_ARATH	E2FB_ARATH	CCT12_ARATH	DNLI1_ARATH	TEB_ARATH	CDC22_ARATH	GLYT7_ARATH	DPB2_ARATH	F4HV47_ARATH	A0A1P8B7P7_ARATH	F4HPK7_ARATH
biological_process	GO:0043161	proteasome-mediated ubiquitin-dependent protein catabolic process	20	102	0.196078	0.954471	0.063536	1	1	BRG1_ARATH	PUX6_ARATH	SAP1_ARATH	UPL2_ARATH	UBP6_ARATH	UPL1_ARATH	RD23A_ARATH	RD23B_ARATH	RD23C_ARATH	BTSL2_ARATH	ACSA1_ARATH	Q9M0W4_ARATH	F4HQX6_ARATH	A0A1P8B5A1_ARATH	A0A1P8AW31_ARATH	F4K250_ARATH	F4JI85_ARATH	B3H5V4_ARATH	F4IF85_ARATH	F4IF83_ARATH
molecular_function	GO:0016874	ligase activity	20	141	0.141844	0.109279	0.916641	1	1	PIAL1_ARATH	PIAL2_ARATH	BTSL1_ARATH	BTSL2_ARATH	B3H786_ARATH	Q9LF48_ARATH	A0A1P8BC35_ARATH	Q9C8A7_ARATH	Q84W43_ARATH	Q9LZR4_ARATH	Q9LXU4_ARATH	Q9LNT6_ARATH	F4ISH3_ARATH	A0A1I9LQ97_ARATH	F4J7Z8_ARATH	F4J7Z6_ARATH	A0A1P8BFE7_ARATH	A0A1I9LTL2_ARATH	A0A1P8BC36_ARATH	B3H5A6_ARATH
biological_process	GO:0051607	defense response to virus	19	60	0.316667	0.999703	0.000829818	1	0.593	DCL2_ARATH	DCL3_ARATH	EXA1_ARATH	AGO10_ARATH	NIPA6_ARATH	PUM5_ARATH	WRKY8_ARATH	AGO1_ARATH	AGO2_ARATH	AGO7_ARATH	AGO3_ARATH	AGO9_ARATH	A0A1I9LMD3_ARATH	F4J0I5_ARATH	A0A1I9LR45_ARATH	A0A1I9LMD4_ARATH	A0A1I9LMD2_ARATH	A0A1P8ATL0_ARATH	A0A1P8ATK9_ARATH
molecular_function	GO:0005096	GTPase activator activity	19	100	0.19	0.971996	0.0459123	1	1	AGD7_ARATH	GAP22_ARATH	RGAP1_ARATH	RGAP2_ARATH	RGAP6_ARATH	AGD2_ARATH	AGD14_ARATH	AGD6_ARATH	Q9LVD7_ARATH	Q9SZR5_ARATH	B3H765_ARATH	Q9SIJ7_ARATH	Q8W4K6_ARATH	A1L4V1_ARATH	F4JUM1_ARATH	F4JX92_ARATH	A0A1P8ATE8_ARATH	A0A1P8ATB6_ARATH	F4HXP0_ARATH
biological_process	GO:0009585	red, far-red light phototransduction	19	55	0.345455	0.999998	8.11693e-06	1	0.006	PHYC_ARATH	PHYD_ARATH	PHYE_ARATH	SPA3_ARATH	SPA2_ARATH	FHY3_ARATH	CSN4_ARATH	DET1_ARATH	ELF3_ARATH	LAF1_ARATH	PIF5_ARATH	PIF3_ARATH	MED25_ARATH	PKS1_ARATH	PIF4_ARATH	VOZ2_ARATH	GIGAN_ARATH	A0A1P8AVD9_ARATH	A0A178VXX1_ARATH
cellular_component	GO:0005681	spliceosomal complex	19	97	0.195876	0.985954	0.0224721	1	1	PRP43_ARATH	SKIP_ARATH	SF1_ARATH	PRP16_ARATH	SUA_ARATH	CDKG1_ARATH	DEXHC_ARATH	DEXHD_ARATH	DEXHE_ARATH	ARS1_ARATH	ICLN_ARATH	DEAH2_ARATH	DEAH4_ARATH	DEAH6_ARATH	ESP3_ARATH	Q9LZT6_ARATH	A0A1P8ATZ2_ARATH	F4K203_ARATH	A0A1P8ATW0_ARATH
cellular_component	GO:0000932	P-body	19	73	0.260274	0.9999	0.00030597	1	0.066	VCR_ARATH	VCS_ARATH	RENT1_ARATH	SMG7_ARATH	PATH1_ARATH	DCP5L_ARATH	EXA1_ARATH	HESO1_ARATH	DCP1_ARATH	PATH2_ARATH	PAT1H_ARATH	XRN4_ARATH	VIP2_ARATH	O65707_ARATH	F4JCS8_ARATH	A0A1I9LRS8_ARATH	F4HVV6_ARATH	A8MR45_ARATH	A0A1P8B9R0_ARATH
molecular_function	GO:0003682	chromatin binding	19	140	0.135714	0.999924	0.000155739	1	0.074	SMC21_ARATH	SCC11_ARATH	SMC22_ARATH	TAF2_ARATH	BRM_ARATH	MCMBP_ARATH	CMT2_ARATH	CND2_ARATH	F4K4G6_ARATH	F4JXC7_ARATH	Q8GWP1_ARATH	Q8RWG0_ARATH	Q9LIM2_ARATH	Q9CAP6_ARATH	F4JCS8_ARATH	Q9SU69_ARATH	A0A1P8BCY7_ARATH	F4KHP4_ARATH	A0A1I9LTA1_ARATH
biological_process	GO:0045087	innate immune response	18	98	0.183673	0.970481	0.0437776	1	1	M2K1_ARATH	M2K2_ARATH	M3K1_ARATH	BRE1A_ARATH	MP3K2_ARATH	BRE1B_ARATH	PRP16_ARATH	PAT1H_ARATH	NUP88_ARATH	Y1661_ARATH	TPST_ARATH	TRF1A_ARATH	TRF1B_ARATH	BIK1_ARATH	AGO1_ARATH	ILA_ARATH	AHL15_ARATH	BIG5_ARATH
cellular_component	GO:0031969	chloroplast membrane	18	161	0.111801	0.754987	0.30366	1	1	RER6_ARATH	SCY2_ARATH	FAX2_ARATH	GLR34_ARATH	EGY2_ARATH	KEA3_ARATH	PAM71_ARATH	KEA1_ARATH	RUS1_ARATH	RER5_ARATH	CHLG_ARATH	DTX44_ARATH	Q94C78_ARATH	F4K0T7_ARATH	F4JHE9_ARATH	A0A1I9LNA2_ARATH	A0A1P8B2W9_ARATH	F4K0T6_ARATH
cellular_component	GO:0005635	nuclear envelope	18	93	0.193548	0.99999	2.39454e-05	1	0.006	IMPA4_ARATH	IQD5_ARATH	IMPA7_ARATH	IQD8_ARATH	NU205_ARATH	IQD29_ARATH	C3H16_ARATH	GACP2_ARATH	GACP3_ARATH	NUP1_ARATH	NUA_ARATH	IMPA6_ARATH	IQD7_ARATH	NUP58_ARATH	NU98B_ARATH	NUP88_ARATH	TBG2_ARATH	F4K465_ARATH
biological_process	GO:0006417	regulation of translation	18	82	0.219512	0.997621	0.00423913	1	0.991	PIR_ARATH	AGO10_ARATH	PABP1_ARATH	PP438_ARATH	PUM3_ARATH	Y14_ARATH	PUM6_ARATH	AGO1_ARATH	ILA_ARATH	AGO2_ARATH	AGO7_ARATH	AGO3_ARATH	AGO9_ARATH	A0A1P8ARB7_ARATH	A0A178VL84_ARATH	A0A1P8AT97_ARATH	A0A2H1ZEI5_ARATH	F4HVV7_ARATH
biological_process	GO:0006364	rRNA processing	18	147	0.122449	0.0505443	0.96612	1	1	RH40_ARATH	GAF1_ARATH	NOP2C_ARATH	RH53_ARATH	RH14_ARATH	RH32_ARATH	RH36_ARATH	Q9S826_ARATH	Q9SFU7_ARATH	B5X503_ARATH	Q9FNM8_ARATH	Q6NQA0_ARATH	A0A1I9LP28_ARATH	A0A1I9LP29_ARATH	F4JAY1_ARATH	F4JAY0_ARATH	F4KB50_ARATH	A0A1P8BDG3_ARATH
molecular_function	GO:0003684	damaged DNA binding	18	53	0.339623	0.999999	5.32441e-06	1	0.002	ERCC1_ARATH	POLK_ARATH	POLH_ARATH	XPF_ARATH	RD23A_ARATH	RD23B_ARATH	RD23C_ARATH	NBS1_ARATH	A0A1P8ANG9_ARATH	F4I354_ARATH	A0A1P8ANJ3_ARATH	A0A1P8ANG2_ARATH	A0A1I9LSV8_ARATH	A0A1P8AW31_ARATH	A0A1P8BG35_ARATH	F4IF85_ARATH	F4IF83_ARATH	F4IDZ7_ARATH
biological_process	GO:0030048	actin filament-based movement	18	44	0.409091	1	1.0929e-06	1	0.003	PMIR1_ARATH	MYO10_ARATH	MYO12_ARATH	MYO13_ARATH	MYO5_ARATH	MYO7_ARATH	A0A1P8AZE5_ARATH	A0A1P8AZD5_ARATH	A0A1P8AXI9_ARATH	F4JVZ5_ARATH	A0A1P8AXP2_ARATH	A0A1P8AZF4_ARATH	A0A1P8B303_ARATH	A0A1P8AZF2_ARATH	A0A1P8AXI6_ARATH	A0A1P8AZG5_ARATH	A0A1P8B304_ARATH	A0A1P8B2Y8_ARATH
cellular_component	GO:0016592	mediator complex	18	64	0.28125	0.999955	0.000152319	1	0.028	RECQ2_ARATH	MED8_ARATH	MED16_ARATH	CDKE1_ARATH	MED17_ARATH	MD33A_ARATH	MD10B_ARATH	MED4_ARATH	MDA2_ARATH	MED6_ARATH	MED25_ARATH	PR40A_ARATH	MED14_ARATH	MD20B_ARATH	MED23_ARATH	MD20A_ARATH	MD15A_ARATH	A0A1P8B6J9_ARATH
cellular_component	GO:0005871	kinesin complex	18	31	0.580645	1	3.25193e-10	1	0	KN14N_ARATH	KN7D_ARATH	KN12A_ARATH	KN7M_ARATH	KN14M_ARATH	KN10C_ARATH	KN12B_ARATH	KN8A_ARATH	KN8B_ARATH	KINUA_ARATH	KINUB_ARATH	KINUC_ARATH	KN14C_ARATH	KN14T_ARATH	KN12C_ARATH	KN12D_ARATH	KN14D_ARATH	F4K4W1_ARATH
cellular_component	GO:0009505	plant-type cell wall	17	349	0.0487106	2.51891e-05	0.99999	0	1	PDLP1_ARATH	PER61_ARATH	PER12_ARATH	MFP2_ARATH	OST1B_ARATH	PIE1_ARATH	RH53_ARATH	RETOL_ARATH	WAKLB_ARATH	WAK1_ARATH	2AAA_ARATH	GLYT7_ARATH	FTIP3_ARATH	2AAG_ARATH	BBE23_ARATH	BBE14_ARATH	F4JLY4_ARATH
cellular_component	GO:0099503	secretory vesicle	17	168	0.10119	0.343169	0.743736	1	1	PDI11_ARATH	PDI12_ARATH	SBT17_ARATH	CRK9_ARATH	GPDL4_ARATH	FUCO1_ARATH	FLA8_ARATH	CHI59_ARATH	FLA9_ARATH	UPS5_ARATH	APA1_ARATH	APA2_ARATH	CRR38_ARATH	AB28G_ARATH	CISY2_ARATH	Q9SFB1_ARATH	F4JTK8_ARATH
cellular_component	GO:0009579	thylakoid	17	223	0.0762332	9.48955e-06	0.999995	0	1	PDI11_ARATH	PSBD_ARATH	CP33_ARATH	ALB4_ARATH	ANTR1_ARATH	FTSH5_ARATH	RK4_ARATH	ATPA_ARATH	TI205_ARATH	RPS1_ARATH	TATB_ARATH	TL15A_ARATH	TL1Y_ARATH	RR6_ARATH	CLPP4_ARATH	Q42139_ARATH	F4JAF3_ARATH
biological_process	GO:0009826	unidimensional cell growth	17	91	0.186813	0.97037	0.0426091	1	1	CSI3_ARATH	KN5A_ARATH	GNOM_ARATH	GT14A_ARATH	ELF3_ARATH	ESP1_ARATH	PSL5_ARATH	THE1_ARATH	TON2_ARATH	XRN4_ARATH	ACAP1_ARATH	BIG_ARATH	IRE_ARATH	MYO5_ARATH	CLASP_ARATH	ELF6_ARATH	Q0WNQ5_ARATH
biological_process	GO:0035556	intracellular signal transduction	17	199	0.0854271	0.960165	0.0508917	1	1	PDPK1_ARATH	IQD5_ARATH	CDPKT_ARATH	MPK10_ARATH	MPK9_ARATH	MPK16_ARATH	SIK1_ARATH	TSL_ARATH	WNK4_ARATH	IRE_ARATH	MPK19_ARATH	MPK20_ARATH	F4JDE3_ARATH	Q8H0X4_ARATH	Q9FLZ0_ARATH	F4I2K0_ARATH	F4KFA3_ARATH
molecular_function	GO:0046982	protein heterodimerization activity	17	146	0.116438	0.543164	0.559421	1	1	TAF9_ARATH	ANM13_ARATH	BZP10_ARATH	BZP63_ARATH	E2FC_ARATH	ANM14_ARATH	SEUSS_ARATH	SNX2B_ARATH	TAF4B_ARATH	HTR12_ARATH	TAF12_ARATH	TA12B_ARATH	NFYB8_ARATH	NFYBA_ARATH	DPB_ARATH	F4JUD2_ARATH	A0A1P8BB52_ARATH
biological_process	GO:0048366	leaf development	17	122	0.139344	0.994333	0.0084752	1	1	TIF4A_ARATH	TIF4B_ARATH	GRF8_ARATH	FKB42_ARATH	KTI12_ARATH	FAS1_ARATH	ARFS_ARATH	SPER2_ARATH	P2C04_ARATH	TCP24_ARATH	TBG2_ARATH	TCP3_ARATH	TCP10_ARATH	TBG1_ARATH	ARFG_ARATH	GIF1_ARATH	F4I642_ARATH
cellular_component	GO:0009534	chloroplast thylakoid	17	234	0.0726496	0.000157386	0.999916	0.012	1	PSBD_ARATH	MFP1_ARATH	BASS2_ARATH	AROG_ARATH	PAM71_ARATH	FTSH5_ARATH	ATPA_ARATH	PAO_ARATH	STR4_ARATH	TATB_ARATH	TL15A_ARATH	CHLG_ARATH	GCSP1_ARATH	FTSH1_ARATH	Q42139_ARATH	F4K452_ARATH	F4JAF3_ARATH
molecular_function	GO:0003697	single-stranded DNA binding	17	89	0.191011	0.948397	0.0883014	1	1	RECA3_ARATH	RBG3_ARATH	ERCC1_ARATH	BH140_ARATH	RECA4_ARATH	MCM2_ARATH	POLK_ARATH	RECAM_ARATH	XPF_ARATH	MCM6_ARATH	OSB3_ARATH	RFA2A_ARATH	RFA2B_ARATH	EMF1_ARATH	Q5XVE2_ARATH	F4KBP3_ARATH	A0A1I9LTM3_ARATH
biological_process	GO:0000724	double-strand break repair via homologous recombination	17	88	0.193182	0.989415	0.0199777	1	1	SM3L2_ARATH	RECQ2_ARATH	ERCC1_ARATH	MRE11_ARATH	FAS1_ARATH	RQL1_ARATH	RQL3_ARATH	XPF_ARATH	REV3_ARATH	RFA2A_ARATH	RFA2B_ARATH	NBS1_ARATH	BRCA1_ARATH	Q9FHS4_ARATH	Q709F6_ARATH	Q84VP9_ARATH	F4IYI1_ARATH
cellular_component	GO:0005643	nuclear pore	17	43	0.395349	0.999998	7.16351e-06	1	0.001	NU205_ARATH	C3H16_ARATH	NUP1_ARATH	NUA_ARATH	NP214_ARATH	NUP58_ARATH	NUP88_ARATH	XPOT_ARATH	NU155_ARATH	A0A1P8BGY9_ARATH	A0A2H1ZE90_ARATH	A0A1P8B2E0_ARATH	Q0WQA5_ARATH	Q9SLC7_ARATH	Q9SFB1_ARATH	A0A1P8AN64_ARATH	A0A1P8BGZ1_ARATH
cellular_component	GO:0009706	chloroplast inner membrane	17	90	0.188889	0.986493	0.0270843	1	1	RBL11_ARATH	TI236_ARATH	TIC40_ARATH	PHT21_ARATH	KEA2_ARATH	CDP1_ARATH	ANTR2_ARATH	OEP37_ARATH	FAX1_ARATH	TI205_ARATH	PAO_ARATH	TI214_ARATH	TI100_ARATH	Q5PP33_ARATH	Q94C78_ARATH	F4JHE9_ARATH	F4JBW0_ARATH
molecular_function	GO:0003746	translation elongation factor activity	17	95	0.178947	0.972241	0.0513105	1	1	EF2_ARATH	A0A1P8BD97_ARATH	A0A1P8BFE6_ARATH	F4JXV3_ARATH	B9DFA5_ARATH	F4KI84_ARATH	O81015_ARATH	Q8GYX6_ARATH	Q56XZ5_ARATH	Q0WQB7_ARATH	A0A1P8BCP5_ARATH	Q9SKA8_ARATH	A0A178UDY8_ARATH	A0A178UHQ5_ARATH	A0A1P8AV66_ARATH	F4JWU1_ARATH	A0A1P8BFF4_ARATH
biological_process	GO:0006914	autophagy	17	54	0.314815	0.999999	2.8193e-06	1	0.005	VPS39_ARATH	ATG9_ARATH	ATG11_ARATH	AT18F_ARATH	ATG7_ARATH	SC16B_ARATH	VPS51_ARATH	BAG6_ARATH	AT13A_ARATH	AT18A_ARATH	MAG5_ARATH	AT18G_ARATH	F4I458_ARATH	A0A1I9LT68_ARATH	A0A1R7T3J2_ARATH	A0A1P8BE45_ARATH	A0A1P8B9X0_ARATH
molecular_function	GO:0003743	translation initiation factor activity	17	151	0.112583	0.483118	0.617314	1	1	EIF3A_ARATH	TA12B_ARATH	IF4G1_ARATH	IF4G_ARATH	EIF3D_ARATH	IF4B3_ARATH	A0A1P8BFE6_ARATH	B9DFA5_ARATH	F4KI84_ARATH	O49733_ARATH	A0A1P8APA8_ARATH	Q94C21_ARATH	F4J1N5_ARATH	A8MR97_ARATH	F4I6D6_ARATH	A8MR62_ARATH	A0A1P8BFF4_ARATH
cellular_component	GO:0046658	anchored component of plasma membrane	16	175	0.0914286	0.239721	0.832004	1	1	HIPL2_ARATH	GPDL4_ARATH	FLA8_ARATH	COBL2_ARATH	GPDL3_ARATH	FLA9_ARATH	COBL4_ARATH	COBL6_ARATH	E1313_ARATH	E133_ARATH	COBL1_ARATH	COBL7_ARATH	Q8GYS2_ARATH	Q9SRT4_ARATH	F4I0Z2_ARATH	F4IKB3_ARATH
biological_process	GO:0071456	cellular response to hypoxia	16	241	0.06639	0.00564495	0.997198	0.909	1	HRS1_ARATH	B561P_ARATH	FLZ8_ARATH	C3H47_ARATH	PERK9_ARATH	NU98B_ARATH	UBP1C_ARATH	WRK70_ARATH	MBF1C_ARATH	ARI12_ARATH	F4HSH9_ARATH	Q9SJQ0_ARATH	Q93WK6_ARATH	Q9SRT1_ARATH	Q9LMK8_ARATH	Q9LRY7_ARATH
molecular_function	GO:0005506	iron ion binding	16	468	0.034188	4.21558e-11	1	0	1	PSBD_ARATH	C71B5_ARATH	C98A9_ARATH	P4H6_ARATH	ALDO4_ARATH	C70B3_ARATH	ALDO1_ARATH	ALDO2_ARATH	ALDO3_ARATH	F4JLY4_ARATH	O49373_ARATH	A0A1P8AZK7_ARATH	A0A1P8AZL3_ARATH	A0A1P8AZL6_ARATH	F4HQ70_ARATH	A0A1P8B8D9_ARATH
biological_process	GO:0009553	embryo sac development	16	71	0.225352	0.949085	0.0809491	1	1	FPA_ARATH	CKI1_ARATH	NOF1_ARATH	RH36_ARATH	MAA3_ARATH	PV42B_ARATH	GEX1_ARATH	MYB88_ARATH	GFA2_ARATH	ASHH2_ARATH	F4HTG1_ARATH	Q9FM57_ARATH	F4JXF0_ARATH	F4JAV9_ARATH	F4IIX4_ARATH	F4HU48_ARATH
cellular_component	GO:0080008	Cul4-RING E3 ubiquitin ligase complex	16	92	0.173913	0.986226	0.0270054	1	1	SPA2_ARATH	KTN82_ARATH	KTN83_ARATH	MSI5_ARATH	KTN84_ARATH	SMU1_ARATH	RTOR2_ARATH	MSI4_ARATH	Q9C5N4_ARATH	Q9SK69_ARATH	Q94AB4_ARATH	F4HQX6_ARATH	F4HUT3_ARATH	F4IL43_ARATH	F4IJ68_ARATH	F4I7E1_ARATH
biological_process	GO:0040008	regulation of growth	16	140	0.114286	0.867355	0.167992	1	1	SMG7_ARATH	CSI3_ARATH	AP2L1_ARATH	BLI_ARATH	BZP29_ARATH	ERF1X_ARATH	ERF1Y_ARATH	ERF1Z_ARATH	BZP30_ARATH	ING2_ARATH	MED14_ARATH	IRE_ARATH	GLYT7_ARATH	DUF8_ARATH	DUF9_ARATH	BH074_ARATH
cellular_component	GO:0005694	chromosome	16	60	0.266667	0.999983	3.04145e-05	1	0.007	RECQ2_ARATH	JHS1_ARATH	MLH3_ARATH	KN14A_ARATH	SIK1_ARATH	RQL1_ARATH	RQL3_ARATH	SCC11_ARATH	WAPL1_ARATH	WAPL2_ARATH	SUVR5_ARATH	TOP3A_ARATH	ASY1_ARATH	A0A1P8ASU0_ARATH	A0A1I9LLC4_ARATH	F4HXR5_ARATH
molecular_function	GO:0071949	FAD binding	16	106	0.150943	0.88438	0.17971	1	1	RETOL_ARATH	ALDO4_ARATH	GGLO2_ARATH	GGLO4_ARATH	GGLO5_ARATH	GGLO6_ARATH	BBE23_ARATH	ALDO1_ARATH	BBE14_ARATH	ALDO2_ARATH	ALDO3_ARATH	A0A1P8BBH9_ARATH	A0A1P8AZK7_ARATH	Q9ZQN9_ARATH	A0A1P8AZL3_ARATH	A0A1P8AZL6_ARATH
molecular_function	GO:0003887	DNA-directed DNA polymerase activity	16	48	0.333333	0.999982	7.32254e-05	1	0.029	POLK_ARATH	STIL3_ARATH	POLH_ARATH	REV3_ARATH	STI_ARATH	TEB_ARATH	A0A1P8AMQ2_ARATH	F4HTM5_ARATH	Q66GR7_ARATH	A0A1P8AMM8_ARATH	A0A1P8ANG9_ARATH	A0A1P8ANJ3_ARATH	A0A1P8ANG2_ARATH	B3H623_ARATH	A0A1P8AMN7_ARATH	A0A1P8ATS6_ARATH
molecular_function	GO:0003712	transcription coregulator activity	16	79	0.202532	1	3.29321e-09	1	0	MED17_ARATH	MD10B_ARATH	MED4_ARATH	PHL_ARATH	MED14_ARATH	HUA2_ARATH	RGA_ARATH	HUAL3_ARATH	CMTA1_ARATH	CMTA2_ARATH	CMTA3_ARATH	Q9C9Q1_ARATH	Q84JY3_ARATH	Q0WKW1_ARATH	F4JPL2_ARATH	F4IPJ1_ARATH
cellular_component	GO:0016459	myosin complex	16	46	0.347826	0.999999	6.08015e-06	1	0.001	MYO10_ARATH	MYO13_ARATH	MYO5_ARATH	MYO7_ARATH	A0A1P8AZE5_ARATH	A0A1P8AZD5_ARATH	A0A1P8AXI9_ARATH	F4JVZ5_ARATH	A0A1P8AXP2_ARATH	A0A1P8AZF4_ARATH	A0A1P8B303_ARATH	A0A1P8AZF2_ARATH	A0A1P8AXI6_ARATH	A0A1P8AZG5_ARATH	A0A1P8B304_ARATH	A0A1P8B2Y8_ARATH
biological_process	GO:0009416	response to light stimulus	15	175	0.0857143	0.778683	0.255729	1	1	RAP24_ARATH	LSH2_ARATH	LSH7_ARATH	LSH9_ARATH	GLTB1_ARATH	ANTR1_ARATH	GATA6_ARATH	G2OX4_ARATH	PPR45_ARATH	PHL_ARATH	MSRA3_ARATH	TAF1B_ARATH	DOF25_ARATH	GHR1_ARATH	EF115_ARATH
biological_process	GO:0009408	response to heat	15	174	0.0862069	0.534223	0.542247	1	1	RAP24_ARATH	HFA1A_ARATH	HIT4_ARATH	DNAJ1_ARATH	CMKMT_ARATH	RECAM_ARATH	VP53A_ARATH	DNJ63_ARATH	WRK33_ARATH	MBF1C_ARATH	BAG6_ARATH	AB40G_ARATH	GFA2_ARATH	F4HWI4_ARATH	A0A1P8APZ8_ARATH
biological_process	GO:0000398	mRNA splicing, via spliceosome	15	172	0.0872093	0.529558	0.545694	1	1	CPSF_ARATH	PRP8A_ARATH	SKIP_ARATH	PR40A_ARATH	PRP16_ARATH	PR40B_ARATH	SUA_ARATH	U1165_ARATH	CDKG1_ARATH	AML1_ARATH	Q9LZT6_ARATH	Q8LCC7_ARATH	Q9ZVX7_ARATH	F4JUE3_ARATH	F4JRD3_ARATH
biological_process	GO:0006298	mismatch repair	15	36	0.416667	1	8.70031e-07	1	0.002	MLH3_ARATH	MLH1_ARATH	NAI2L_ARATH	A0A1P8B459_ARATH	A0A1P8B429_ARATH	Q9SS53_ARATH	A0A1P8AMZ6_ARATH	A0A1P8B4Y5_ARATH	A0A1P8B434_ARATH	A0A1P8B465_ARATH	A0A1P8B406_ARATH	A0A1P8B439_ARATH	F4I9U0_ARATH	A0A1P8B445_ARATH	F4JYU0_ARATH
biological_process	GO:0009617	response to bacterium	15	130	0.115385	0.549967	0.50499	1	1	NU205_ARATH	LOX4_ARATH	LUH_ARATH	CHI5_ARATH	SEUSS_ARATH	PRB1_ARATH	SARD1_ARATH	WRK11_ARATH	WRK48_ARATH	WRK53_ARATH	WRK70_ARATH	MYB29_ARATH	MYB30_ARATH	LEUNG_ARATH	E70H1_ARATH
molecular_function	GO:0008289	lipid binding	15	177	0.0847458	0.0592025	0.957891	1	1	PDF2_ARATH	HAP2_ARATH	HDG4_ARATH	LTG15_ARATH	HDG7_ARATH	C2D61_ARATH	LTG26_ARATH	HGL2_ARATH	ATHB8_ARATH	Q94C36_ARATH	B9UY99_ARATH	A0A1P8AMA1_ARATH	A0A1P8BG00_ARATH	F4JB32_ARATH	F4HQC0_ARATH
cellular_component	GO:0016607	nuclear speck	15	93	0.16129	0.948949	0.0903442	1	1	PHYA_ARATH	PHYB_ARATH	DRB1_ARATH	CYP63_ARATH	LAF1_ARATH	SMU1_ARATH	SKIP_ARATH	THOC2_ARATH	Y14_ARATH	VIR_ARATH	VIN3_ARATH	CDKG1_ARATH	HAKAI_ARATH	C3H37_ARATH	AML1_ARATH
cellular_component	GO:0010008	endosome membrane	15	107	0.140187	0.764652	0.3106	1	1	SIPL1_ARATH	GNOM_ARATH	FAB1A_ARATH	FAB1B_ARATH	FAB1C_ARATH	FAB1D_ARATH	VP53A_ARATH	EHD1_ARATH	PR1B3_ARATH	PR1B2_ARATH	VP35B_ARATH	BIK1_ARATH	FTIP3_ARATH	A0A1P8ATX5_ARATH	A0A1P8ATZ0_ARATH
molecular_function	GO:0003924	GTPase activity	15	284	0.0528169	0.000278335	0.999883	0.036	1	DGP2_ARATH	RHD32_ARATH	TBG2_ARATH	TC120_ARATH	TBG1_ARATH	LIIP2_ARATH	DRP1D_ARATH	EF2_ARATH	A0A1P8BFE6_ARATH	B9DFA5_ARATH	F4KI84_ARATH	Q9ASU6_ARATH	Q8W4K6_ARATH	F4JCC8_ARATH	A0A1P8BFF4_ARATH
biological_process	GO:0051321	meiotic cell cycle	15	65	0.230769	1	9.82065e-13	1	0	SMC21_ARATH	SMG7_ARATH	ATM_ARATH	GACP2_ARATH	GACP3_ARATH	GACP4_ARATH	SMC1_ARATH	SMC22_ARATH	HTR12_ARATH	TOP3A_ARATH	CDKG1_ARATH	AML1_ARATH	A0A1P8BBU0_ARATH	A0A1P8BB63_ARATH	A0A1I9LLC4_ARATH
molecular_function	GO:0003714	transcription corepressor activity	15	64	0.234375	0.997456	0.00652808	1	0.993	SNL4_ARATH	LUH_ARATH	SEUSS_ARATH	SIR1_ARATH	TPR4_ARATH	Y4919_ARATH	LEUNG_ARATH	F4K4G6_ARATH	A0A1P8BG30_ARATH	Q8GWP1_ARATH	A0A1P8BG27_ARATH	F4K4H9_ARATH	A0A1P8BA02_ARATH	F4JUD2_ARATH	A0A1P8BFX4_ARATH
molecular_function	GO:0008237	metallopeptidase activity	15	43	0.348837	0.820768	0.24407	1	1	EGY2_ARATH	PRP8A_ARATH	SPP_ARATH	PRP8B_ARATH	PSA_ARATH	TAF2_ARATH	AMSH3_ARATH	F4I3R1_ARATH	A0A1P8API4_ARATH	F4I3R0_ARATH	F4K0T7_ARATH	F4I3R4_ARATH	A0A2H1ZEN3_ARATH	B3H621_ARATH	F4K0T6_ARATH
molecular_function	GO:0005507	copper ion binding	14	219	0.0639269	0.00557005	0.997355	0.632	1	RBG3_ARATH	MMSA_ARATH	ADT2_ARATH	ADK2_ARATH	KAD4_ARATH	SAHH1_ARATH	ADK1_ARATH	FTHS_ARATH	AAT1_ARATH	EF2_ARATH	F4K6Z6_ARATH	F4K6Z5_ARATH	F4IAX1_ARATH	F4K6Z4_ARATH
biological_process	GO:0009723	response to ethylene	14	99	0.141414	0.828117	0.220513	1	1	RBOHF_ARATH	BPC3_ARATH	GAI_ARATH	RAP23_ARATH	ARFS_ARATH	PRB1_ARATH	WRKY4_ARATH	RGA_ARATH	2AAA_ARATH	ARFG_ARATH	AB40G_ARATH	EF113_ARATH	Q84TG2_ARATH	F4I9T6_ARATH
biological_process	GO:0009753	response to jasmonic acid	14	138	0.101449	0.887329	0.154867	1	1	LRP1C_ARATH	LOX3_ARATH	RAP23_ARATH	SPE2_ARATH	PRB1_ARATH	TI10A_ARATH	WRKY4_ARATH	WRK70_ARATH	MYC2_ARATH	MYC3_ARATH	AB40G_ARATH	DOF11_ARATH	EF113_ARATH	Q2V4Q1_ARATH
biological_process	GO:0016042	lipid catabolic process	14	186	0.0752688	0.0147583	0.991267	0.999	1	PLA2A_ARATH	PLA12_ARATH	PLCD4_ARATH	SHGR2_ARATH	AB1D_ARATH	GDL53_ARATH	GDL62_ARATH	GLIP5_ARATH	GLIP7_ARATH	Q94AB1_ARATH	A0A1I9LQ38_ARATH	A0A1I9LQ42_ARATH	A0A1P8B0P3_ARATH	A0A1I9LQ40_ARATH
molecular_function	GO:0030983	mismatched DNA binding	14	32	0.4375	0.999999	8.85414e-06	1	0.004	BH140_ARATH	MLH3_ARATH	MLH1_ARATH	NAI2L_ARATH	A0A1P8B429_ARATH	Q9SS53_ARATH	A0A1P8AMZ6_ARATH	A0A1P8B4Y5_ARATH	A0A1P8B434_ARATH	A0A1P8B465_ARATH	A0A1P8B439_ARATH	F4I9U0_ARATH	A0A1P8B445_ARATH	F4JYU0_ARATH
molecular_function	GO:0043621	protein self-association	14	116	0.12069	0.607956	0.504825	1	1	R13L4_ARATH	BZP63_ARATH	CDP1_ARATH	NIPA6_ARATH	PYRP2_ARATH	RHON1_ARATH	SEOB_ARATH	FDM1_ARATH	PUB10_ARATH	Y4554_ARATH	FD_ARATH	AHL22_ARATH	BRO1_ARATH	F4I5R5_ARATH
biological_process	GO:0031047	gene silencing by RNA	14	64	0.21875	1	1.9957e-10	1	0	MOM1_ARATH	CTF64_ARATH	CTF77_ARATH	AGO10_ARATH	NRPD2_ARATH	DMS3_ARATH	AGO2_ARATH	AGO3_ARATH	AGO9_ARATH	C3H19_ARATH	A0A1I9LNP6_ARATH	A0A1P8ATL0_ARATH	A0A1P8ATK9_ARATH	A0A1I9LNP4_ARATH
biological_process	GO:0006974	cellular response to DNA damage stimulus	14	53	0.264151	1	1.13289e-19	1	0	JHS1_ARATH	CHR8_ARATH	CRWN4_ARATH	LUH_ARATH	SEUSS_ARATH	THG1_ARATH	PARG1_ARATH	REV3_ARATH	NBS1_ARATH	LEUNG_ARATH	DNLI4_ARATH	Q9CA92_ARATH	F4I701_ARATH	A0A1P8APW6_ARATH
molecular_function	GO:0031490	chromatin DNA binding	14	38	0.368421	0.999945	0.000211897	1	0.148	HAC1_ARATH	HAC4_ARATH	HAC5_ARATH	HAC12_ARATH	SIR1_ARATH	MD15A_ARATH	MD15C_ARATH	FIS2C_ARATH	EMF2_ARATH	A0A1P8AQ17_ARATH	Q9LMQ5_ARATH	A0A1P8AQ03_ARATH	A0A1P8AVD7_ARATH	A0A1P8AV92_ARATH
molecular_function	GO:0004402	histone acetyltransferase activity	14	29	0.482759	0.999999	5.71742e-06	1	0.003	HAC1_ARATH	HAC4_ARATH	HAC5_ARATH	HAC12_ARATH	MBD9_ARATH	IDM1_ARATH	A0A1P8ARU4_ARATH	A0A1P8ARV8_ARATH	A0A1P8ARV7_ARATH	A0A1P8ATA1_ARATH	A0A1P8AQG0_ARATH	A0A1I9LPG3_ARATH	F4IDH2_ARATH	F4I4I8_ARATH
molecular_function	GO:0004843	thiol-dependent deubiquitinase	14	86	0.162791	0.922948	0.131268	1	1	UBP15_ARATH	UBP4_ARATH	UBP27_ARATH	UBP6_ARATH	UBP18_ARATH	AMSH3_ARATH	F4IJH1_ARATH	F4JCR1_ARATH	A0A2H1ZEQ5_ARATH	F4I642_ARATH	F4JMQ2_ARATH	F4JVD6_ARATH	A0A1P8AYX2_ARATH	B3H5V4_ARATH
biological_process	GO:0042147	retrograde transport, endosome to Golgi	14	32	0.4375	0.999999	8.2826e-06	1	0.006	VP53A_ARATH	VP35B_ARATH	VPS51_ARATH	VPS54_ARATH	Q8RWU2_ARATH	A0A1P8ATX5_ARATH	A0A1P8ATR6_ARATH	A0A1P8ATZ0_ARATH	F4HYH6_ARATH	A0A1P8AQF4_ARATH	F4JH69_ARATH	A0A1P8ATS8_ARATH	A0A1P8ASX9_ARATH	F4I6L0_ARATH
biological_process	GO:0009751	response to salicylic acid	13	110	0.118182	0.564031	0.526563	1	1	LRP1C_ARATH	CRK9_ARATH	MB3R4_ARATH	PRB1_ARATH	WAK1_ARATH	WRK30_ARATH	WRK53_ARATH	WRKY4_ARATH	WRK70_ARATH	MD15A_ARATH	AB40G_ARATH	EF113_ARATH	Q9LT00_ARATH
biological_process	GO:0031347	regulation of defense response	13	57	0.22807	0.77292	0.283988	1	1	PHYB_ARATH	SMG7_ARATH	TIF4A_ARATH	TIF4B_ARATH	TIF6B_ARATH	KN7D_ARATH	EXA1_ARATH	MP3K2_ARATH	TI10A_ARATH	TCP14_ARATH	WRK53_ARATH	WRK70_ARATH	Q8L7G9_ARATH
biological_process	GO:0009624	response to nematode	13	82	0.158537	0.905208	0.15936	1	1	ANTR1_ARATH	GACP3_ARATH	GACP4_ARATH	LUH_ARATH	SEUSS_ARATH	TBG2_ARATH	WRK23_ARATH	TBG1_ARATH	IRT3_ARATH	LEUNG_ARATH	AB9C_ARATH	AB1B_ARATH	AB5F_ARATH
biological_process	GO:0006289	nucleotide-excision repair	13	46	0.282609	0.99998	6.80326e-05	1	0.093	XPF_ARATH	RD23A_ARATH	RD23B_ARATH	RD23C_ARATH	RFA2A_ARATH	RFA2B_ARATH	A0A1P8AV25_ARATH	Q709F6_ARATH	F4IHC3_ARATH	A0A1P8AW31_ARATH	F4HUN8_ARATH	F4IF85_ARATH	F4IF83_ARATH
molecular_function	GO:0051537	2 iron, 2 sulfur cluster binding	13	70	0.185714	0.967849	0.0636554	1	1	MOM1_ARATH	GRS16_ARATH	FDC2_ARATH	PAO_ARATH	UCRI2_ARATH	ALDO4_ARATH	ALDO1_ARATH	ALDO2_ARATH	ALDO3_ARATH	A0A1P8AZK7_ARATH	Q9C6K0_ARATH	A0A1P8AZL3_ARATH	A0A1P8AZL6_ARATH
molecular_function	GO:0003899	DNA-directed 5'-3' RNA polymerase activity	13	100	0.13	0.563817	0.553408	1	1	NRPE1_ARATH	RPOT3_ARATH	RPD2B_ARATH	NRPC2_ARATH	NRPD2_ARATH	Q93Z91_ARATH	O23684_ARATH	Q8H1E1_ARATH	A0A1P8B756_ARATH	F4INQ5_ARATH	A0A1I9LNQ9_ARATH	A0A1P8BFS9_ARATH	A0A1I9LNQ8_ARATH
biological_process	GO:0016579	protein deubiquitination	13	84	0.154762	0.900659	0.160193	1	1	UBP15_ARATH	UBP4_ARATH	UBP27_ARATH	UBP6_ARATH	UBP18_ARATH	F4IJH1_ARATH	F4JCR1_ARATH	A0A2H1ZEQ5_ARATH	F4I642_ARATH	F4JVD6_ARATH	A0A1P8AYX2_ARATH	A0A2H1ZEN3_ARATH	B3H5V4_ARATH
biological_process	GO:0006396	RNA processing	13	71	0.183099	0.991583	0.0106723	1	1	PEP_ARATH	CPSF_ARATH	DRB1_ARATH	COIL_ARATH	TAD1_ARATH	RNC1_ARATH	Q8VYM7_ARATH	Q9LSH4_ARATH	O82388_ARATH	Q9M033_ARATH	F4JAF3_ARATH	A0A178W929_ARATH	A0A178W782_ARATH
biological_process	GO:0006887	exocytosis	13	58	0.224138	0.948272	0.0955151	1	1	SEC3A_ARATH	SEC3B_ARATH	EX84A_ARATH	HLB1_ARATH	ESP1_ARATH	SECAB_ARATH	SECAA_ARATH	E70A1_ARATH	E70H1_ARATH	Q9C9E5_ARATH	F4K0X7_ARATH	F4KGM7_ARATH	F4HTA1_ARATH
biological_process	GO:0000911	cytokinesis by cell plate formation	13	47	0.276596	0.999984	5.39057e-05	1	0.072	RUK_ARATH	KN5A_ARATH	GNOM_ARATH	ESP1_ARATH	KN14A_ARATH	TANB_ARATH	TBG2_ARATH	TR120_ARATH	TBG1_ARATH	KN12C_ARATH	KN12D_ARATH	F4JIB6_ARATH	A0A1P8B8X7_ARATH
biological_process	GO:0002229	defense response to oomycetes	13	75	0.173333	0.913074	0.145411	1	1	LK111_ARATH	EXA1_ARATH	LRK42_ARATH	LRK12_ARATH	LRK11_ARATH	SARD1_ARATH	LRK16_ARATH	WRK70_ARATH	LRK62_ARATH	LRK63_ARATH	LRK81_ARATH	AB40G_ARATH	Q9LNW6_ARATH
molecular_function	GO:0031593	polyubiquitin modification-dependent protein binding	13	41	0.317073	0.999847	0.00059254	1	0.272	DSK2B_ARATH	DSK2A_ARATH	RD23A_ARATH	RD23B_ARATH	RD23C_ARATH	Q8L745_ARATH	Q9M0W4_ARATH	F4JWQ4_ARATH	A0A1P8AW31_ARATH	F4JI85_ARATH	F4JD59_ARATH	F4IF85_ARATH	F4IF83_ARATH
cellular_component	GO:0005743	mitochondrial inner membrane	12	157	0.0764331	8.77569e-06	0.999997	0	1	ADT2_ARATH	NDB2_ARATH	ATP61_ARATH	OXA1_ARATH	SURFL_ARATH	Y5520_ARATH	AB25B_ARATH	AB23B_ARATH	A0A178U7J2_ARATH	F4IZR4_ARATH	F4HYG9_ARATH	A0A1P8ASC2_ARATH
molecular_function	GO:0035091	phosphatidylinositol binding	12	38	0.315789	0.992739	0.0156549	1	1	PDPK1_ARATH	PRAF1_ARATH	TOL7_ARATH	TOL5_ARATH	SNX2B_ARATH	TOL6_ARATH	TOL9_ARATH	A0A1P8B8V4_ARATH	F4JV51_ARATH	A0A1P8BF56_ARATH	F4JDV4_ARATH	F4IJE1_ARATH
biological_process	GO:0018105	peptidyl-serine phosphorylation	12	102	0.117647	0.553064	0.568619	1	1	PDPK1_ARATH	CKL4_ARATH	CDPKT_ARATH	MPS1_ARATH	P2C19_ARATH	TSL_ARATH	YAK1_ARATH	ATG1B_ARATH	ATG1C_ARATH	IRE_ARATH	Q8RX85_ARATH	F4I2K0_ARATH
cellular_component	GO:0005667	transcription regulator complex	12	27	0.444444	0.999969	6.78321e-05	1	0.012	SLK3_ARATH	SLK1_ARATH	HAC1_ARATH	HAC4_ARATH	HAC5_ARATH	HAC12_ARATH	ELF3_ARATH	SEUSS_ARATH	MED25_ARATH	MED23_ARATH	DPB_ARATH	F4HV47_ARATH
cellular_component	GO:0032300	mismatch repair complex	12	21	0.571429	1	3.98427e-07	1	0	MLH3_ARATH	MLH1_ARATH	A0A1P8B459_ARATH	A0A1P8B429_ARATH	Q9SS53_ARATH	A0A1P8B4Y5_ARATH	A0A1P8B434_ARATH	A0A1P8B465_ARATH	A0A1P8B406_ARATH	A0A1P8B439_ARATH	A0A1P8B445_ARATH	F4JYU0_ARATH
cellular_component	GO:0005774	vacuolar membrane	12	151	0.0794702	0.0656626	0.955971	1	1	FKB42_ARATH	CCX1_ARATH	AT18F_ARATH	SAC4_ARATH	PTR2_ARATH	VA713_ARATH	AMSH3_ARATH	AT18D_ARATH	AT18A_ARATH	AT18G_ARATH	DTX31_ARATH	AB27B_ARATH
cellular_component	GO:0005840	ribosome	12	197	0.0609137	4.31899e-11	1	0	1	RR6_ARATH	Q94AF6_ARATH	Q9FGV5_ARATH	Q2V4Q4_ARATH	Q9SU26_ARATH	Q9SUR4_ARATH	Q8LCC7_ARATH	Q9M8M9_ARATH	Q9LMQ3_ARATH	A0A1P8AV66_ARATH	Q3EDH2_ARATH	F4JRD3_ARATH
molecular_function	GO:0003735	structural constituent of ribosome	12	456	0.0263158	6.12409e-13	1	0	1	RK4_ARATH	RR20_ARATH	RPS1_ARATH	PSA6B_ARATH	RR6_ARATH	Q2V4Q4_ARATH	Q9SUR4_ARATH	Q9M8M9_ARATH	Q9LMQ3_ARATH	F4JPA3_ARATH	A0A1P8AV66_ARATH	Q3EDH2_ARATH
molecular_function	GO:0004252	serine-type endopeptidase activity	12	176	0.0681818	0.020909	0.989539	0.98	1	RBL11_ARATH	RBL15_ARATH	SBT17_ARATH	DGP10_ARATH	SBT32_ARATH	SBT15_ARATH	SBT13_ARATH	RBL1_ARATH	CRSP_ARATH	AARE_ARATH	CLPP4_ARATH	F4J5V3_ARATH
cellular_component	GO:0000785	chromatin	12	74	0.162162	0.985656	0.0234062	1	1	SMC21_ARATH	SNL4_ARATH	FPA_ARATH	MRE11_ARATH	MD10B_ARATH	PDS5B_ARATH	SMC22_ARATH	MLH1_ARATH	HTR12_ARATH	ASY1_ARATH	ASHH2_ARATH	F4JV27_ARATH
molecular_function	GO:0008094	ATP-dependent activity, acting on DNA	12	52	0.230769	1	3.7873e-32	1	0	RECA3_ARATH	DDM1_ARATH	CHR8_ARATH	ISW2_ARATH	RECA4_ARATH	RECAM_ARATH	SYD_ARATH	BRM_ARATH	CHR17_ARATH	Q9SS53_ARATH	A0A1I9LTM3_ARATH	F4JYU0_ARATH
cellular_component	GO:1990904	ribonucleoprotein complex	12	56	0.214286	0.0362918	0.972289	0.971	1	RH40_ARATH	FCA_ARATH	PABP1_ARATH	PABP5_ARATH	RH14_ARATH	RH46_ARATH	EF2_ARATH	Q94AF6_ARATH	Q6AWW6_ARATH	Q9SU26_ARATH	Q9LMX6_ARATH	F4IT98_ARATH
biological_process	GO:0010087	phloem or xylem histogenesis	12	59	0.20339	0.862031	0.202154	1	1	GNOM_ARATH	CKI1_ARATH	AHK3_ARATH	XRN4_ARATH	VAB_ARATH	ZWIP6_ARATH	AHK2_ARATH	MYB61_ARATH	1A15_ARATH	Q8VY20_ARATH	Q9LUI0_ARATH	Q9FKS3_ARATH
biological_process	GO:0009620	response to fungus	12	97	0.123711	0.00156346	0.998991	0.479	1	PME41_ARATH	LOX3_ARATH	LUH_ARATH	MB3R4_ARATH	PERK1_ARATH	SEUSS_ARATH	WAKLI_ARATH	CHI58_ARATH	BIG_ARATH	BIK1_ARATH	LEUNG_ARATH	E70H1_ARATH
molecular_function	GO:0004525	ribonuclease III activity	12	33	0.363636	0.999952	0.000228535	1	0.152	DRB1_ARATH	DCL2_ARATH	DCL3_ARATH	RNC1_ARATH	A0A1P8B4K5_ARATH	F4JHB3_ARATH	A0A1I9LMD3_ARATH	F4J0I5_ARATH	A0A1I9LR45_ARATH	A0A1I9LMD4_ARATH	A0A1I9LMD2_ARATH	A0A1P8AQD8_ARATH
biological_process	GO:0009740	gibberellic acid mediated signaling pathway	12	83	0.144578	0.824696	0.265801	1	1	GAI_ARATH	GIS3_ARATH	GIS_ARATH	GASA4_ARATH	PIF3_ARATH	ZFP6_ARATH	RGA_ARATH	NAC40_ARATH	MYB57_ARATH	MYB65_ARATH	A8MQL8_ARATH	A0A2H1ZEH3_ARATH
biological_process	GO:0007166	cell surface receptor signaling pathway	12	57	0.210526	0.888141	0.186612	1	1	MCAC1_ARATH	WAKLB_ARATH	PUB13_ARATH	WAKLQ_ARATH	WAKLD_ARATH	WAKLH_ARATH	WAK1_ARATH	WAKLG_ARATH	WAKLI_ARATH	Y2685_ARATH	PUB12_ARATH	Q8RX25_ARATH
molecular_function	GO:0008574	plus-end-directed microtubule motor activity	12	17	0.705882	1	2.45206e-08	1	0	KN5B_ARATH	KN12A_ARATH	KN5A_ARATH	KN5C_ARATH	KN5D_ARATH	KN12B_ARATH	KN8A_ARATH	KN8B_ARATH	KINUA_ARATH	KINUB_ARATH	KINUC_ARATH	KN14T_ARATH
biological_process	GO:0051225	spindle assembly	12	34	0.352941	0.999988	5.10728e-05	1	0.067	KN14N_ARATH	KN14M_ARATH	GACP2_ARATH	GACP3_ARATH	GACP4_ARATH	TPX2_ARATH	KN14C_ARATH	QWRF3_ARATH	QWRF6_ARATH	AUG1_ARATH	KN14D_ARATH	EDE1_ARATH
molecular_function	GO:0020037	heme binding	11	499	0.0220441	1.32269e-15	1	0	1	PER61_ARATH	PER12_ARATH	C71B5_ARATH	C98A9_ARATH	C70B3_ARATH	F4JLY4_ARATH	O49373_ARATH	F4K452_ARATH	F4IMA2_ARATH	F4HQ70_ARATH	A0A1P8B8D9_ARATH
biological_process	GO:0006888	endoplasmic reticulum to Golgi vesicle-mediated transport	11	82	0.134146	0.99587	0.0086637	1	1	SYP31_ARATH	SYP32_ARATH	COPB2_ARATH	COPA2_ARATH	GOS12_ARATH	COPA1_ARATH	COPB1_ARATH	F4KH34_ARATH	F4J110_ARATH	F4J109_ARATH	F4IP68_ARATH
molecular_function	GO:0016829	lyase activity	11	133	0.0827068	0.0125332	0.991361	0.909	1	Q9SYK7_ARATH	Q9M318_ARATH	Q9SYK6_ARATH	O22699_ARATH	Q9CAL5_ARATH	A0A1I9LS89_ARATH	F4JUA6_ARATH	A0A1P8AWW0_ARATH	A0A1P8B326_ARATH	A0A1I9LS88_ARATH	A0A1P8B659_ARATH
biological_process	GO:0009860	pollen tube growth	11	129	0.0852713	0.0930627	0.944729	1	1	FIMB5_ARATH	KIP_ARATH	PLRX2_ARATH	DNJ63_ARATH	Y1301_ARATH	PTR5_ARATH	ZWIP2_ARATH	MY120_ARATH	AB28G_ARATH	CALS5_ARATH	F4JLB7_ARATH
biological_process	GO:0009867	jasmonic acid mediated signaling pathway	11	76	0.144737	0.896115	0.15815	1	1	PHYB_ARATH	RENT1_ARATH	TIF6B_ARATH	GAI_ARATH	MED25_ARATH	RENT3_ARATH	TI10A_ARATH	TA12B_ARATH	RGA_ARATH	MYB29_ARATH	MYB57_ARATH
biological_process	GO:0045490	pectin catabolic process	11	119	0.092437	0.248062	0.837914	1	1	PLY12_ARATH	PME47_ARATH	PME41_ARATH	PME51_ARATH	PME7_ARATH	PME53_ARATH	PME25_ARATH	RLK5_ARATH	Q9SF49_ARATH	Q9FY87_ARATH	A0A178UA07_ARATH
cellular_component	GO:0009705	plant-type vacuole membrane	11	133	0.0827068	0.274732	0.810886	1	1	SYP22_ARATH	VPS39_ARATH	NRT26_ARATH	SHGR6_ARATH	S40A2_ARATH	NRT23_ARATH	SHGR2_ARATH	Y5613_ARATH	PTR2_ARATH	KCO3_ARATH	ALMTE_ARATH
molecular_function	GO:0022857	transmembrane transporter activity	11	336	0.0327381	9.0594e-05	0.999935	0.009	1	UTR5B_ARATH	DTX34_ARATH	NAT2_ARATH	DTX31_ARATH	A0A1P8AXG7_ARATH	Q0IGM5_ARATH	Q9S710_ARATH	F4IT87_ARATH	B3H4C7_ARATH	F4IT88_ARATH	A0A1P8B2Z7_ARATH
biological_process	GO:0006412	translation	11	359	0.0306407	0.000181034	0.999888	0.059	1	RENT1_ARATH	RK4_ARATH	RR20_ARATH	RPS1_ARATH	RR6_ARATH	Q2V4Q4_ARATH	Q9SUR4_ARATH	Q9M8M9_ARATH	Q9LMQ3_ARATH	F4JPA3_ARATH	Q3EDH2_ARATH
cellular_component	GO:0005887	integral component of plasma membrane	11	108	0.101852	0.437427	0.681075	1	1	TI236_ARATH	PHT21_ARATH	HAP2_ARATH	GEX2_ARATH	MCAC1_ARATH	ACA9_ARATH	AAP2_ARATH	GEX1_ARATH	AB6B_ARATH	AB20B_ARATH	A0A1P8AYW3_ARATH
molecular_function	GO:0030276	clathrin binding	11	27	0.407407	0.994547	0.0137183	1	1	APBLB_ARATH	EPN2_ARATH	APBLA_ARATH	AUXI2_ARATH	AUL1_ARATH	EPN3_ARATH	JAC1_ARATH	APBLC_ARATH	Q9XI12_ARATH	F4JXV9_ARATH	F4JNZ8_ARATH
biological_process	GO:0006406	mRNA export from nucleus	11	31	0.354839	0.999745	0.000930754	1	0.693	NUA_ARATH	SAC3B_ARATH	THOC2_ARATH	NUP88_ARATH	THO5A_ARATH	A0A1P8ARZ0_ARATH	A0A1P8AS05_ARATH	A0A1P8ARY6_ARATH	A0A178W886_ARATH	F4IAT3_ARATH	A0A1P8AS07_ARATH
biological_process	GO:0000209	protein polyubiquitination	11	100	0.11	0.45478	0.661196	1	1	ARI1_ARATH	UPL2_ARATH	UBE4_ARATH	UPL6_ARATH	UBC33_ARATH	UPL1_ARATH	ACSA1_ARATH	ARI12_ARATH	Q9M1F1_ARATH	F4HQX6_ARATH	B3H5A6_ARATH
cellular_component	GO:0000775	chromosome, centromeric region	11	36	0.305556	0.997222	0.00702328	1	0.838	SIK1_ARATH	SGO1_ARATH	SGO2_ARATH	HTR12_ARATH	AGDP1_ARATH	ASHH2_ARATH	A0A1I9LQA4_ARATH	A0A1I9LT08_ARATH	F4J4B9_ARATH	A0A1P8BFE9_ARATH	A0A1I9LT11_ARATH
biological_process	GO:0006865	amino acid transport	11	63	0.174603	0.694169	0.422738	1	1	AVT1C_ARATH	AVT1D_ARATH	AVT1G_ARATH	LHTL7_ARATH	AAP2_ARATH	AAP4_ARATH	AAP7_ARATH	A0A1P8BC87_ARATH	A0A1P8BC79_ARATH	A0A1P8B0T4_ARATH	A0A1P8B3H8_ARATH
cellular_component	GO:0031982	vesicle	11	86	0.127907	0.9738	0.0327712	1	1	MYO10_ARATH	MYO12_ARATH	MYO13_ARATH	AUXI2_ARATH	AUL1_ARATH	MYO5_ARATH	MYO7_ARATH	JAC1_ARATH	E70H1_ARATH	Q9XI12_ARATH	F4KGM7_ARATH
molecular_function	GO:0004527	exonuclease activity	11	49	0.22449	0.83258	0.233083	1	1	APE2_ARATH	A0A1P8AX44_ARATH	Q66GR7_ARATH	Q5XV34_ARATH	A0A1P8B5S6_ARATH	A0A1P8AZ51_ARATH	B3H623_ARATH	A0A1P8B5S9_ARATH	F4IRT2_ARATH	A0A1P8B5S2_ARATH	A0A1P8ATS6_ARATH
cellular_component	GO:0030015	CCR4-NOT core complex	11	25	0.44	0.999995	3.22253e-05	1	0.008	VIP2_ARATH	A0A1P8ARB7_ARATH	Q0WP31_ARATH	A0A1P8B9Q7_ARATH	A0A1P8B9E0_ARATH	F4HVV6_ARATH	F4JWJ6_ARATH	A8MR45_ARATH	F4HVV7_ARATH	F4JWJ7_ARATH	A0A1P8B9R0_ARATH
cellular_component	GO:0000347	THO complex	11	26	0.423077	0.999992	5.02402e-05	1	0.011	MCM2_ARATH	THOC2_ARATH	MCM6_ARATH	THO5A_ARATH	A0A1P8ARZ0_ARATH	A0A1P8AS05_ARATH	A0A1P8ARY6_ARATH	A0A178W886_ARATH	F4IAT3_ARATH	A0A1P8AS07_ARATH	F4HPK7_ARATH
molecular_function	GO:0030170	pyridoxal phosphate binding	10	128	0.078125	0.0992521	0.944586	1	1	SERB1_ARATH	BIODA_ARATH	MGL_ARATH	TAT2_ARATH	GCSP1_ARATH	GCSP2_ARATH	AAT1_ARATH	1A15_ARATH	Q9CAP1_ARATH	Q9FYH8_ARATH
cellular_component	GO:0005759	mitochondrial matrix	10	118	0.0847458	0.00950966	0.995666	0.568	1	KCY2_ARATH	BIODA_ARATH	GLTB1_ARATH	GRS16_ARATH	DGP10_ARATH	PP438_ARATH	CISY2_ARATH	AAT1_ARATH	Q7Y1Z8_ARATH	F4IKY1_ARATH
molecular_function	GO:0016746	acyltransferase activity	10	48	0.208333	0.000876472	0.999485	0.125	1	A0A1P8AQA5_ARATH	A0A1I9LNN9_ARATH	A0A1P8BG30_ARATH	Q8RWG0_ARATH	Q0WQ36_ARATH	Q8S9I8_ARATH	F4K4H9_ARATH	F4I6Q3_ARATH	A0A1P8BA02_ARATH	A0A1P8B2A1_ARATH
molecular_function	GO:0051082	unfolded protein binding	10	131	0.0763359	0.0844016	0.953834	1	1	DNAJ1_ARATH	TCPG_ARATH	NACA1_ARATH	NACA2_ARATH	NACA3_ARATH	NACA5_ARATH	GFA2_ARATH	Q0WUY5_ARATH	F4HWI4_ARATH	A0A1P8APZ8_ARATH
biological_process	GO:0009739	response to gibberellin	10	76	0.131579	0.650446	0.447312	1	1	GAI_ARATH	GIS_ARATH	GASA4_ARATH	WRK27_ARATH	TCP14_ARATH	RGA_ARATH	NAC40_ARATH	O80829_ARATH	Q84TG2_ARATH	Q9LT00_ARATH
cellular_component	GO:0012505	endomembrane system	10	146	0.0684932	4.71203e-05	0.999964	0.002	1	SYP21_ARATH	SYP22_ARATH	SYP31_ARATH	SYP32_ARATH	RIN4_ARATH	CSI3_ARATH	LIIP2_ARATH	BIK1_ARATH	E70H1_ARATH	CHX11_ARATH
biological_process	GO:0010224	response to UV-B	10	67	0.149254	0.754088	0.366571	1	1	ERCC1_ARATH	RUS1_ARATH	POLH_ARATH	MSI4_ARATH	SARD1_ARATH	SAG12_ARATH	ACSA1_ARATH	ARI12_ARATH	F4HTM5_ARATH	F4HUT3_ARATH
biological_process	GO:0042752	regulation of circadian rhythm	10	39	0.25641	0.997282	0.00717262	1	1	TIC_ARATH	ELF3_ARATH	SKIP_ARATH	GIGAN_ARATH	Q9C9Q1_ARATH	B3H7F6_ARATH	A0A1I9LQ49_ARATH	A8MRY5_ARATH	F4JXG7_ARATH	F4J0W8_ARATH
molecular_function	GO:0000155	phosphorelay sensor kinase activity	10	20	0.5	0.999996	3.05742e-05	1	0.015	PHYA_ARATH	PHYB_ARATH	PHYD_ARATH	PHYE_ARATH	CKI1_ARATH	AHK3_ARATH	ERS1_ARATH	AHK2_ARATH	A0A1P8AVD9_ARATH	A0A178VXX1_ARATH
biological_process	GO:0009640	photomorphogenesis	10	58	0.172414	0.870359	0.200754	1	1	PHYA_ARATH	PHYB_ARATH	SPA3_ARATH	SPA2_ARATH	CKL4_ARATH	TEB_ARATH	BIG_ARATH	AB1B_ARATH	AHL22_ARATH	F4IWU4_ARATH
biological_process	GO:0010218	response to far red light	10	41	0.243902	0.996218	0.010927	1	1	PHYA_ARATH	PHYB_ARATH	GAI_ARATH	FHY3_ARATH	FAR1_ARATH	MED25_ARATH	PKS1_ARATH	RGA_ARATH	AGO1_ARATH	GIGAN_ARATH
cellular_component	GO:0005615	extracellular space	10	187	0.0534759	0.0354445	0.980499	0.969	1	SBT32_ARATH	PRB1_ARATH	SAG12_ARATH	Y1049_ARATH	RD19C_ARATH	ASY1_ARATH	GGH1_ARATH	Q9LZW6_ARATH	Q9M0C8_ARATH	Q9SCT5_ARATH
biological_process	GO:0035194	post-transcriptional gene silencing by RNA	10	17	0.588235	1	2.63586e-08	1	0	NRPE1_ARATH	NRPD2_ARATH	ESP3_ARATH	Q8VYM7_ARATH	Q9M033_ARATH	A0A1I9LMD3_ARATH	F4J0I5_ARATH	A0A1I9LR45_ARATH	A0A1I9LMD4_ARATH	A0A1I9LMD2_ARATH
biological_process	GO:0009736	cytokinin-activated signaling pathway	10	87	0.114943	0.707701	0.407813	1	1	RAP24_ARATH	GIS3_ARATH	CKI1_ARATH	AB14G_ARATH	AHK3_ARATH	ZFP6_ARATH	TA12B_ARATH	ARR13_ARATH	AHK2_ARATH	ARR21_ARATH
biological_process	GO:0034605	cellular response to heat	10	57	0.175439	0.998382	0.00397321	1	0.99	HFA1A_ARATH	IAN4_ARATH	HFA6A_ARATH	HSFA5_ARATH	DNJ63_ARATH	WRK33_ARATH	WRK25_ARATH	RB47B_ARATH	R47BP_ARATH	CMT2_ARATH
biological_process	GO:0009626	plant-type hypersensitive response	10	75	0.133333	0.854589	0.227747	1	1	RIN4_ARATH	LSD1_ARATH	CPSF_ARATH	BZP10_ARATH	RPS5_ARATH	RIN13_ARATH	SARD1_ARATH	SAG12_ARATH	MYB30_ARATH	F4JUW0_ARATH
biological_process	GO:0006486	protein glycosylation	10	146	0.0684932	0.00487469	0.997764	0.874	1	FUT8_ARATH	B3GT5_ARATH	MNS2_ARATH	MGAT1_ARATH	B3GT7_ARATH	Q6NKR6_ARATH	Q0WWD8_ARATH	W8QP14_ARATH	B3H4Y4_ARATH	F4JTL6_ARATH
cellular_component	GO:0009504	cell plate	10	39	0.25641	0.997224	0.0088366	1	0.882	SYP31_ARATH	EPN2_ARATH	KN14A_ARATH	UPS5_ARATH	AUXI2_ARATH	EPN3_ARATH	AUR1_ARATH	Q9ASZ4_ARATH	B9DH97_ARATH	F4KGM7_ARATH
molecular_function	GO:0000977	RNA polymerase II transcription regulatory region sequence-specific DNA binding	10	65	0.153846	0.999842	0.000279475	1	0.164	F4K4G6_ARATH	F4JXC7_ARATH	Q8RWG0_ARATH	A0A1P8BA62_ARATH	Q0WRE2_ARATH	A0A1P8BDR0_ARATH	F4KEP6_ARATH	A0A1P8BDN7_ARATH	F4I972_ARATH	F4KEP8_ARATH
biological_process	GO:0009960	endosperm development	10	34	0.294118	0.994897	0.0149074	1	1	IKU1_ARATH	ESP1_ARATH	PBRP2_ARATH	PP273_ARATH	VQ5_ARATH	TTL_ARATH	AGL62_ARATH	ICE1_ARATH	EDE1_ARATH	Q3EBM8_ARATH
biological_process	GO:0008360	regulation of cell shape	10	52	0.192308	0.948131	0.104208	1	1	CSI3_ARATH	CALS8_ARATH	CALS3_ARATH	CALS7_ARATH	CALS5_ARATH	E9KSP0_ARATH	F4K116_ARATH	A0A178W3E8_ARATH	F4IW73_ARATH	A0A1I9LQE8_ARATH
biological_process	GO:0006623	protein targeting to vacuole	10	39	0.25641	0.993751	0.0177004	1	1	SYP21_ARATH	BECN1_ARATH	VSR1_ARATH	VSR6_ARATH	Q8S9J3_ARATH	A0A1I9LQ65_ARATH	F4JNE2_ARATH	A0A1P8B773_ARATH	A0A1P8BEE1_ARATH	F4JHM9_ARATH
biological_process	GO:0010215	cellulose microfibril organization	10	22	0.454545	0.999989	8.1567e-05	1	0.105	COBL8_ARATH	COBL2_ARATH	COBL4_ARATH	COBL6_ARATH	COBL1_ARATH	COBL7_ARATH	A0A1P8BE86_ARATH	A0A1P8BE64_ARATH	A0A178UK60_ARATH	A0A1P8AU31_ARATH
cellular_component	GO:0000145	exocyst	10	45	0.222222	0.990991	0.0240028	1	1	SEC3A_ARATH	SEC3B_ARATH	EX84A_ARATH	SECAB_ARATH	SECAA_ARATH	E70A1_ARATH	E70H1_ARATH	Q9C9E5_ARATH	F4KGM7_ARATH	F4HTA1_ARATH
biological_process	GO:2000022	regulation of jasmonic acid mediated signaling pathway	10	45	0.222222	0.987032	0.0327805	1	1	TIF4A_ARATH	TIF4B_ARATH	TIF6B_ARATH	MED16_ARATH	PUB10_ARATH	SYD_ARATH	TI10A_ARATH	WRK11_ARATH	WRK53_ARATH	WRK70_ARATH
molecular_function	GO:0050661	NADP binding	10	90	0.111111	0.39897	0.720073	1	1	AKH2_ARATH	GSXL7_ARATH	GLYR2_ARATH	GSXL4_ARATH	HEM13_ARATH	A0A1P8AVD8_ARATH	A0A1P8AS42_ARATH	Q8VYC5_ARATH	B3H739_ARATH	F4IAP5_ARATH
biological_process	GO:0006261	DNA-dependent DNA replication	10	29	0.344828	0.999998	4.10003e-06	1	0.005	STIL3_ARATH	STI_ARATH	TEB_ARATH	MCMBP_ARATH	DPB2_ARATH	ABAP1_ARATH	Q66GR7_ARATH	A0A1P8BH84_ARATH	B3H623_ARATH	A0A1P8ATS6_ARATH
biological_process	GO:0006457	protein folding	9	149	0.0604027	0.00679842	0.996653	0.94	1	PDI11_ARATH	PDI12_ARATH	CYP63_ARATH	CPNB1_ARATH	CPNB4_ARATH	TCPG_ARATH	BAG6_ARATH	F4HWI4_ARATH	A0A1P8APZ8_ARATH
molecular_function	GO:0004650	polygalacturonase activity	9	87	0.103448	0.416909	0.710423	1	1	Q9SYK7_ARATH	Q9M318_ARATH	Q9SYK6_ARATH	O22699_ARATH	Q9CAL5_ARATH	A0A1I9LS89_ARATH	F4JUA6_ARATH	A0A1I9LS88_ARATH	A0A1P8B659_ARATH
biological_process	GO:0002237	response to molecule of bacterial origin	9	37	0.243243	0.982099	0.0429751	1	1	RIN4_ARATH	M2K1_ARATH	EXA1_ARATH	SIK1_ARATH	TGA9_ARATH	TGA10_ARATH	BIK1_ARATH	MYB72_ARATH	E70H1_ARATH
molecular_function	GO:0004222	metalloendopeptidase activity	9	98	0.0918367	0.267994	0.830275	1	1	FTSH5_ARATH	FTSH1_ARATH	F4IS89_ARATH	Q94K61_ARATH	Q67ZD0_ARATH	F4IS90_ARATH	A0A1P8B118_ARATH	F4K306_ARATH	A0A1P8B127_ARATH
biological_process	GO:0006897	endocytosis	9	56	0.160714	0.788421	0.306187	1	1	CKL4_ARATH	EPN2_ARATH	GNOM_ARATH	EHD1_ARATH	AMSH3_ARATH	EPN3_ARATH	BIG5_ARATH	Q9LM78_ARATH	F4HY32_ARATH
molecular_function	GO:0019901	protein kinase binding	9	60	0.15	0.84019	0.246267	1	1	PEK13_ARATH	ATG11_ARATH	KIPK2_ARATH	PERK9_ARATH	PV42B_ARATH	PERK8_ARATH	ILA_ARATH	F4HYH4_ARATH	A0A1P8AT97_ARATH
biological_process	GO:0007623	circadian rhythm	9	106	0.0849057	0.867248	0.190464	1	1	FB348_ARATH	FHY3_ARATH	GATA3_ARATH	ELF3_ARATH	PHL_ARATH	SCL6_ARATH	TCP11_ARATH	TCP15_ARATH	GIGAN_ARATH
biological_process	GO:0048235	pollen sperm cell differentiation	9	35	0.257143	0.994449	0.0170335	1	1	HAP2_ARATH	LRL1_ARATH	LRL2_ARATH	GEX2_ARATH	MY120_ARATH	MYB65_ARATH	MYB97_ARATH	DUO1_ARATH	F4I5A3_ARATH
biological_process	GO:0010305	leaf vascular tissue pattern formation	9	31	0.290323	0.997924	0.00746735	1	1	DRB1_ARATH	NOV_ARATH	VAB_ARATH	VPS51_ARATH	ZWIP6_ARATH	AGO1_ARATH	ARFE_ARATH	Q8VY20_ARATH	Q9LUI0_ARATH
biological_process	GO:0009845	seed germination	9	80	0.1125	0.83514	0.226913	1	1	PDF2_ARATH	LTG15_ARATH	PERK4_ARATH	MLH1_ARATH	LRK62_ARATH	NAC40_ARATH	LRK63_ARATH	DOF25_ARATH	Q8RWV9_ARATH
biological_process	GO:0006606	protein import into nucleus	9	47	0.191489	0.99163	0.0199151	1	1	NU133_ARATH	NUA_ARATH	NP214_ARATH	NU98B_ARATH	NUP88_ARATH	TNPO1_ARATH	NU155_ARATH	F4JUG3_ARATH	F4HXL3_ARATH
molecular_function	GO:0004675	transmembrane receptor protein serine/threonine kinase activity	9	61	0.147541	0.823695	0.288394	1	1	LK111_ARATH	LRK42_ARATH	LRK12_ARATH	LRK11_ARATH	LRK16_ARATH	LRK62_ARATH	LRK63_ARATH	LRK81_ARATH	Q9LNW6_ARATH
molecular_function	GO:0016818	hydrolase activity, acting on acid anhydrides, in phosphorus-containing anhydrides	9	20	0.45	1	3.4726e-07	1	0	SM3L1_ARATH	SM3L2_ARATH	A0A1P8APW8_ARATH	A0A1P8AV25_ARATH	A0A1P8AQ29_ARATH	A0A1P8AQ53_ARATH	A0A1P8AQ45_ARATH	F4HUN8_ARATH	F4HUN4_ARATH
biological_process	GO:0048510	regulation of timing of transition from vegetative to reproductive phase	9	44	0.204545	0.971622	0.0660019	1	1	ISW2_ARATH	PHL_ARATH	RLT1_ARATH	MSI4_ARATH	HUA2_ARATH	BLH3_ARATH	EAF1A_ARATH	EAF1B_ARATH	CLPP4_ARATH
molecular_function	GO:0016779	nucleotidyltransferase activity	9	51	0.176471	0.981662	0.0264086	1	1	CTU2_ARATH	HESO1_ARATH	AGLUP_ARATH	A0A1I9LQN9_ARATH	O49733_ARATH	Q7Y216_ARATH	F4J6R2_ARATH	F4J6R3_ARATH	A0A1I9LQN7_ARATH
molecular_function	GO:0004707	MAP kinase activity	9	29	0.310345	0.998781	0.00477684	1	0.946	MPK10_ARATH	MP3K2_ARATH	MPK9_ARATH	MPK16_ARATH	MPK19_ARATH	MPK20_ARATH	A0A1I9LRW1_ARATH	A0A1I9LRW2_ARATH	A0A1I9LRW0_ARATH
biological_process	GO:0009451	RNA modification	9	96	0.09375	0.0499516	0.96633	1	1	PP170_ARATH	PP148_ARATH	PPR45_ARATH	PP301_ARATH	PP324_ARATH	PP246_ARATH	PP257_ARATH	PP153_ARATH	PP280_ARATH
biological_process	GO:0008219	cell death	9	28	0.321429	0.961292	0.0587737	1	1	CPNB1_ARATH	RAP23_ARATH	RPS5_ARATH	PAO_ARATH	RIN13_ARATH	UBA2A_ARATH	UBA2C_ARATH	UBA2B_ARATH	F4JUW0_ARATH
molecular_function	GO:0106306	protein serine/threonine phosphatase activity	9	155	0.0580645	NA	NA	NA	NA	CPL3_ARATH	P2C62_ARATH	P2C71_ARATH	P2C72_ARATH	P2C43_ARATH	P2C19_ARATH	P2C04_ARATH	A0A1P8B2G0_ARATH	F4IUD7_ARATH
molecular_function	GO:0106307	protein serine/threonine phosphatase activity	9	155	0.0580645	NA	NA	NA	NA	CPL3_ARATH	P2C62_ARATH	P2C71_ARATH	P2C72_ARATH	P2C43_ARATH	P2C19_ARATH	P2C04_ARATH	A0A1P8B2G0_ARATH	F4IUD7_ARATH
biological_process	GO:0000226	microtubule cytoskeleton organization	9	59	0.152542	1	2.55892e-07	1	0	TBG2_ARATH	TON2_ARATH	TBG1_ARATH	KN14D_ARATH	CLASP_ARATH	EDE1_ARATH	Q9LEQ9_ARATH	Q9SGH3_ARATH	F4J8S4_ARATH
biological_process	GO:0010119	regulation of stomatal movement	9	67	0.134328	0.585836	0.531482	1	1	RBOHF_ARATH	HT1_ARATH	ELF3_ARATH	BIK1_ARATH	2AAA_ARATH	MYB61_ARATH	MYB86_ARATH	Q9C695_ARATH	Q9ZSI4_ARATH
biological_process	GO:0051028	mRNA transport	9	42	0.214286	0.999915	0.000241398	1	0.289	NU205_ARATH	C3H16_ARATH	NP214_ARATH	NUP58_ARATH	NU98B_ARATH	RENT3_ARATH	Y14_ARATH	NU155_ARATH	A0A1P8AN64_ARATH
biological_process	GO:0009631	cold acclimation	9	57	0.157895	0.875176	0.219467	1	1	M2K2_ARATH	M3K1_ARATH	BH067_ARATH	CP29A_ARATH	FUM2_ARATH	MED14_ARATH	EF2_ARATH	Q9M2S1_ARATH	F4JAF3_ARATH
molecular_function	GO:0004197	cysteine-type endopeptidase activity	9	68	0.132353	0.59382	0.546687	1	1	ESP1_ARATH	UBP15_ARATH	SAG12_ARATH	UBP4_ARATH	UBP27_ARATH	UBP18_ARATH	RD19C_ARATH	ASY1_ARATH	A0A1P8B3N4_ARATH
biological_process	GO:0080188	gene silencing by RNA-directed DNA methylation	9	38	0.236842	0.989679	0.0285732	1	1	FDM3_ARATH	MORC6_ARATH	MSI4_ARATH	FDM1_ARATH	IDM1_ARATH	DMS3_ARATH	CHR27_ARATH	CHR28_ARATH	Q9M1S4_ARATH
biological_process	GO:0030433	ubiquitin-dependent ERAD pathway	9	50	0.18	0.914289	0.162427	1	1	RBL15_ARATH	OS9_ARATH	UBE4_ARATH	UBC33_ARATH	F4JG03_ARATH	Q9LPC8_ARATH	Q9M2L3_ARATH	Q8L745_ARATH	F4JWQ4_ARATH
molecular_function	GO:0017056	structural constituent of nuclear pore	9	21	0.428571	0.999948	0.000336254	1	0.185	NU133_ARATH	NUA_ARATH	NP214_ARATH	NUP58_ARATH	NU98B_ARATH	NUP88_ARATH	NU155_ARATH	A0A1P8AN64_ARATH	F4JUG3_ARATH
molecular_function	GO:0004713	protein tyrosine kinase activity	9	51	0.176471	0.942195	0.107522	1	1	M2K1_ARATH	M2K2_ARATH	MPS1_ARATH	YAK1_ARATH	Q8RX85_ARATH	F4IQ85_ARATH	A0A1I9LL69_ARATH	A0A1P8AX69_ARATH	A0A1P8AX88_ARATH
cellular_component	GO:0070971	endoplasmic reticulum exit site	9	22	0.409091	0.999947	0.000333664	1	0.069	SC24A_ARATH	SC16B_ARATH	SC24B_ARATH	SC31B_ARATH	MAG5_ARATH	Q9SIJ7_ARATH	F4JUM1_ARATH	A0A1P8BE45_ARATH	A0A1P8B9X0_ARATH
biological_process	GO:0006338	chromatin remodeling	9	50	0.18	0.969862	0.0533595	1	1	SYD_ARATH	SUVR5_ARATH	BRM_ARATH	HDA18_ARATH	ELF6_ARATH	F4J277_ARATH	A0A1P8AVJ4_ARATH	A0A1P8AP94_ARATH	A0A1I9LT22_ARATH
biological_process	GO:0010091	trichome branching	9	35	0.257143	0.994449	0.0170335	1	1	IQD19_ARATH	BLI_ARATH	MED16_ARATH	GIS_ARATH	FZR2_ARATH	MED25_ARATH	SCAR2_ARATH	STI_ARATH	A0A1P8ARI7_ARATH
biological_process	GO:0009789	positive regulation of abscisic acid-activated signaling pathway	9	52	0.173077	0.922733	0.1494	1	1	RGLG5_ARATH	YAK1_ARATH	TTL1_ARATH	RGLG1_ARATH	2AAA_ARATH	NAC96_ARATH	MYB96_ARATH	CIP1_ARATH	GHR1_ARATH
molecular_function	GO:0016853	isomerase activity	9	54	0.166667	0.00106848	0.999416	0.146	1	RHM1_ARATH	Q9FM77_ARATH	Q9LXM0_ARATH	Q9FMS3_ARATH	A0A1P8B6L8_ARATH	A0A1P8B6M6_ARATH	A0A1P8B6M0_ARATH	F4JP32_ARATH	A0A1P8B4Z4_ARATH
biological_process	GO:0009834	plant-type secondary cell wall biogenesis	9	66	0.136364	0.8141	0.278949	1	1	IRX9_ARATH	CESA8_ARATH	GXM3_ARATH	FLA9_ARATH	IQD14_ARATH	NAC12_ARATH	NAC43_ARATH	COBL4_ARATH	FLA11_ARATH
molecular_function	GO:0015276	ligand-gated ion channel activity	9	42	0.214286	0.9118	0.166232	1	1	GLR34_ARATH	GLR23_ARATH	GLR27_ARATH	GLR28_ARATH	GLR21_ARATH	GLR29_ARATH	A0A1P8B2P3_ARATH	A0A178VR79_ARATH	A0A178VW76_ARATH
biological_process	GO:0006816	calcium ion transport	9	32	0.28125	0.986869	0.0304594	1	1	GLR34_ARATH	GLR23_ARATH	MCAC1_ARATH	GLR27_ARATH	GLR28_ARATH	PAM71_ARATH	ECA1_ARATH	GLR21_ARATH	GLR29_ARATH
biological_process	GO:0006284	base-excision repair	9	35	0.257143	0.989073	0.0283777	1	1	DML2_ARATH	DML3_ARATH	DG783_ARATH	DME_ARATH	ROS1_ARATH	APE2_ARATH	B3H5X5_ARATH	A0A1P8B6V3_ARATH	Q56YU8_ARATH
molecular_function	GO:0000285	1-phosphatidylinositol-3-phosphate 5-kinase activity	9	9	1	1	4.33335e-09	1	0	FAB1A_ARATH	FAB1B_ARATH	FAB1C_ARATH	FAB1D_ARATH	A0A1P8ASD3_ARATH	F4JW00_ARATH	A0A1P8B5M2_ARATH	A0A1P8B5L8_ARATH	F4JW01_ARATH
cellular_component	GO:0035267	NuA4 histone acetyltransferase complex	9	21	0.428571	0.99987	0.000713049	1	0.152	EAF1A_ARATH	EAF1B_ARATH	O64877_ARATH	A0A1I9LL80_ARATH	A0A1I9LPB0_ARATH	F4J7T1_ARATH	F4JPL2_ARATH	A0A1I9LPB1_ARATH	F4IPJ1_ARATH
biological_process	GO:0010090	trichome morphogenesis	8	39	0.205128	0.997826	0.00532805	1	0.999	PIR_ARATH	GTL1_ARATH	GIS3_ARATH	FPP4_ARATH	E2FB_ARATH	SCAR2_ARATH	ZFP6_ARATH	MYO5_ARATH
molecular_function	GO:0000149	SNARE binding	8	66	0.121212	0.770832	0.340816	1	1	SYP21_ARATH	SYP22_ARATH	SYP31_ARATH	SYP32_ARATH	SC24A_ARATH	MIP2_ARATH	SC24B_ARATH	Q8H1E1_ARATH
biological_process	GO:0046686	response to cadmium ion	8	61	0.131148	0.562378	0.585732	1	1	ANM13_ARATH	PIE1_ARATH	PTR47_ARATH	APA3_ARATH	MYB72_ARATH	AB25B_ARATH	GCSP1_ARATH	AB23B_ARATH
cellular_component	GO:0005778	peroxisomal membrane	8	35	0.228571	0.95879	0.0893455	1	1	HMDH1_ARATH	PMP22_ARATH	PEX5_ARATH	PEX14_ARATH	PEX6_ARATH	AB2D_ARATH	HMDH2_ARATH	AB1D_ARATH
biological_process	GO:0006955	immune response	8	22	0.363636	0.0937028	0.921003	1	1	BIG5_ARATH	A0A1I9LMD3_ARATH	F4J0I5_ARATH	A0A1I9LR45_ARATH	A0A1I9LMD4_ARATH	A0A1I9LMD2_ARATH	A0A1P8ATL0_ARATH	A0A1P8ATK9_ARATH
molecular_function	GO:0030247	polysaccharide binding	8	71	0.112676	0.432165	0.69725	1	1	WAKLB_ARATH	WAKLD_ARATH	WAKLH_ARATH	WAK1_ARATH	WAKLG_ARATH	WAKLI_ARATH	Y2685_ARATH	A0A1P8AWN7_ARATH
biological_process	GO:0010029	regulation of seed germination	8	50	0.16	0.772253	0.333918	1	1	PDF2_ARATH	PHYB_ARATH	GAI_ARATH	AHK3_ARATH	TCP14_ARATH	PRT6_ARATH	RGA_ARATH	AHK2_ARATH
biological_process	GO:0048316	seed development	8	73	0.109589	0.936475	0.0799431	1	1	PDI11_ARATH	BLI_ARATH	COBL2_ARATH	MLH1_ARATH	NFYA5_ARATH	NFYA6_ARATH	EDE1_ARATH	Q9FM57_ARATH
biological_process	GO:0018298	protein-chromophore linkage	8	79	0.101266	0.411616	0.721628	1	1	PHYA_ARATH	PHYB_ARATH	PHYC_ARATH	PHYD_ARATH	PHYE_ARATH	PSBD_ARATH	A0A1P8AVD9_ARATH	A0A178VXX1_ARATH
molecular_function	GO:0046910	pectinesterase inhibitor activity	8	94	0.0851064	0.208022	0.877841	1	1	PME47_ARATH	PME41_ARATH	PME51_ARATH	PME7_ARATH	PME25_ARATH	Q2V441_ARATH	Q9LJX2_ARATH	Q9FIN5_ARATH
biological_process	GO:0009910	negative regulation of flower development	8	43	0.186047	0.941694	0.124048	1	1	NUA_ARATH	VIP6_ARATH	VIP5_ARATH	VIP4_ARATH	HUA2_ARATH	ASHH2_ARATH	EMF1_ARATH	EMF2_ARATH
biological_process	GO:0009791	post-embryonic development	8	35	0.228571	0.999775	0.000298018	1	0.32	VCS_ARATH	DSLE_ARATH	RH36_ARATH	MYO5_ARATH	ATXR3_ARATH	EMF1_ARATH	AXL1_ARATH	F4J043_ARATH
biological_process	GO:0007030	Golgi organization	8	39	0.205128	0.933998	0.136947	1	1	SC24A_ARATH	PUX6_ARATH	SC16B_ARATH	VPS51_ARATH	MAG5_ARATH	GOGC2_ARATH	Q8RWV1_ARATH	F4JH69_ARATH
biological_process	GO:0010214	seed coat development	8	33	0.242424	0.998884	0.00341853	1	0.984	SBT17_ARATH	LTG15_ARATH	COBL2_ARATH	PP301_ARATH	SEP3_ARATH	WRK44_ARATH	MYB61_ARATH	DOF15_ARATH
biological_process	GO:0006334	nucleosome assembly	8	49	0.163265	0.904372	0.172089	1	1	TRB4_ARATH	FAS1_ARATH	F4IKF3_ARATH	Q9LSK7_ARATH	Q9T073_ARATH	A0A178WHA3_ARATH	A0A178WID5_ARATH	A0A1P8AQ25_ARATH
biological_process	GO:0048767	root hair elongation	8	53	0.150943	0.957546	0.0807237	1	1	LRL1_ARATH	LRL2_ARATH	HLB1_ARATH	MYO13_ARATH	PRP16_ARATH	RLP48_ARATH	IBR3_ARATH	DTX31_ARATH
molecular_function	GO:0019900	kinase binding	8	49	0.163265	0.928212	0.112049	1	1	M3K1_ARATH	ADK2_ARATH	BZP63_ARATH	CDKE1_ARATH	CDC21_ARATH	AHK2_ARATH	MYC2_ARATH	CDC22_ARATH
cellular_component	GO:0005669	transcription factor TFIID complex	8	33	0.242424	0.991649	0.0254968	1	1	TAF9_ARATH	TAF4B_ARATH	TAF2_ARATH	TAF12_ARATH	TAF1B_ARATH	TA12B_ARATH	A0A1P8API4_ARATH	A0A1P8BB52_ARATH
biological_process	GO:0048481	plant ovule development	8	48	0.166667	0.864094	0.234814	1	1	SEP1_ARATH	SLK1_ARATH	SEUSS_ARATH	SEP2_ARATH	SEP3_ARATH	SYMM_ARATH	AGO9_ARATH	ASHH2_ARATH
biological_process	GO:0008033	tRNA processing	8	34	0.235294	0.216767	0.850379	1	1	GAF1_ARATH	THG1_ARATH	THG2_ARATH	XPOT_ARATH	A0A1R7T3D1_ARATH	F4JXF0_ARATH	F4I824_ARATH	A0A1R7T3D2_ARATH
cellular_component	GO:0000502	proteasome complex	8	84	0.0952381	0.599421	0.522068	1	1	PSB7B_ARATH	PSB7A_ARATH	PSA6A_ARATH	PSA6B_ARATH	PSME4_ARATH	Q9FJC9_ARATH	Q9T090_ARATH	B3H6B0_ARATH
molecular_function	GO:0000166	nucleotide binding	8	79	0.101266	1	8.93187e-18	1	0	RPS5_ARATH	REV3_ARATH	AXL1_ARATH	A0A1P8AMQ2_ARATH	F4HTM5_ARATH	Q9C8D3_ARATH	A0A1P8AMM8_ARATH	A0A1P8AMN7_ARATH
cellular_component	GO:0009574	preprophase band	8	22	0.363636	0.999666	0.00177786	1	0.368	RUK_ARATH	IQD5_ARATH	IQD8_ARATH	FH14_ARATH	IQD7_ARATH	TANB_ARATH	Q9M2F2_ARATH	F4IC87_ARATH
molecular_function	GO:0038023	signaling receptor activity	8	44	0.181818	0.921211	0.112134	1	1	GLR34_ARATH	GLR23_ARATH	GLR27_ARATH	GLR28_ARATH	PYL1_ARATH	RPS5_ARATH	GLR21_ARATH	GLR29_ARATH
biological_process	GO:0009637	response to blue light	8	50	0.16	0.982412	0.0343148	1	1	PMIR1_ARATH	CKL4_ARATH	GBF2_ARATH	ATB52_ARATH	BH078_ARATH	AB1B_ARATH	GIGAN_ARATH	BH074_ARATH
biological_process	GO:0006302	double-strand break repair	8	32	0.25	0.999771	0.000484705	1	0.426	BH140_ARATH	DNLI1_ARATH	TEB_ARATH	DNLI4_ARATH	Q66GR7_ARATH	Q8GUN4_ARATH	Q84VP9_ARATH	A0A1P8BB63_ARATH
biological_process	GO:0000278	mitotic cell cycle	8	49	0.163265	0.999912	0.000160955	1	0.203	GACP2_ARATH	GACP3_ARATH	GACP4_ARATH	TBG2_ARATH	TBG1_ARATH	TPX2_ARATH	TOP3A_ARATH	CLASP_ARATH
cellular_component	GO:0032040	small-subunit processome	8	54	0.148148	0.858341	0.249567	1	1	HEAT1_ARATH	NOF1_ARATH	Q9S826_ARATH	Q8LCC7_ARATH	Q9FNM8_ARATH	F4KB50_ARATH	F4JRD3_ARATH	A0A1P8BDG3_ARATH
biological_process	GO:0019760	glucosinolate metabolic process	8	36	0.222222	0.644437	0.463172	1	1	GIS3_ARATH	GBF2_ARATH	E2FC_ARATH	WRK21_ARATH	ALDO4_ARATH	NFYBA_ARATH	ANT_ARATH	EF113_ARATH
biological_process	GO:0019722	calcium-mediated signaling	8	72	0.111111	0.51059	0.634495	1	1	GLR34_ARATH	GLR23_ARATH	GLR27_ARATH	GLR28_ARATH	PAM71_ARATH	PERK4_ARATH	GLR21_ARATH	GLR29_ARATH
cellular_component	GO:0000148	1,3-beta-D-glucan synthase complex	8	23	0.347826	0.999506	0.00246247	1	0.476	CALS8_ARATH	CALS3_ARATH	CALS7_ARATH	CALS5_ARATH	E9KSP0_ARATH	F4K116_ARATH	F4IW73_ARATH	A0A1I9LQE8_ARATH
molecular_function	GO:0003843	1,3-beta-D-glucan synthase activity	8	23	0.347826	0.99925	0.00351843	1	0.911	CALS8_ARATH	CALS3_ARATH	CALS7_ARATH	CALS5_ARATH	E9KSP0_ARATH	F4K116_ARATH	F4IW73_ARATH	A0A1I9LQE8_ARATH
biological_process	GO:0006075	(1->3)-beta-D-glucan biosynthetic process	8	23	0.347826	0.999802	0.00103328	1	0.711	CALS8_ARATH	CALS3_ARATH	CALS7_ARATH	CALS5_ARATH	E9KSP0_ARATH	F4K116_ARATH	F4IW73_ARATH	A0A1I9LQE8_ARATH
molecular_function	GO:0003824	catalytic activity	8	93	0.0860215	5.88405e-13	1	0	1	A0A1P8ATB7_ARATH	Q56YU8_ARATH	Q9FYH8_ARATH	F4KH85_ARATH	A0A1R7T3D1_ARATH	F4JXF0_ARATH	A0A1P8ATB9_ARATH	A0A1R7T3D2_ARATH
cellular_component	GO:0000922	spindle pole	8	30	0.266667	0.995792	0.0145037	1	0.996	GACP2_ARATH	GACP3_ARATH	GACP4_ARATH	AUR1_ARATH	A0A1I9LLT7_ARATH	Q940S9_ARATH	F4J4K6_ARATH	A0A1I9LLT8_ARATH
molecular_function	GO:0004553	hydrolase activity, hydrolyzing O-glycosyl compounds	8	117	0.0683761	0.0352137	0.974253	1	1	PSL5_ARATH	XYL2_ARATH	XTH26_ARATH	GLGB2_ARATH	Q6NQI6_ARATH	F4I0Z2_ARATH	A0A1P8BAU5_ARATH	F4JJU7_ARATH
molecular_function	GO:0070628	proteasome binding	8	26	0.307692	0.997934	0.00812525	1	0.994	UBP6_ARATH	PSME4_ARATH	RD23A_ARATH	RD23B_ARATH	RD23C_ARATH	Q9M0W4_ARATH	F4JI85_ARATH	F4IF85_ARATH
molecular_function	GO:0003690	double-stranded DNA binding	7	112	0.0625	1	9.35809e-08	1	0	HUA2_ARATH	HUAL3_ARATH	CMTA1_ARATH	CMTA2_ARATH	CMTA3_ARATH	EMF1_ARATH	Q9LSK7_ARATH
biological_process	GO:0006633	fatty acid biosynthetic process	7	107	0.0654206	0.032512	0.98266	1	1	MAOP4_ARATH	LOX4_ARATH	LOX3_ARATH	LOX6_ARATH	Q8RU07_ARATH	Q7Y1Z8_ARATH	F4JGB9_ARATH
biological_process	GO:0016036	cellular response to phosphate starvation	7	80	0.0875	0.380665	0.747339	1	1	HRS1_ARATH	AHK3_ARATH	PAH2_ARATH	PAH1_ARATH	SAB_ARATH	CARB_ARATH	HHO1_ARATH
biological_process	GO:2000028	regulation of photoperiodism, flowering	7	41	0.170732	0.912075	0.152772	1	1	PDP3_ARATH	PHYB_ARATH	ELF3_ARATH	SKIP_ARATH	PUB13_ARATH	FD_ARATH	EAF1B_ARATH
biological_process	GO:0019252	starch biosynthetic process	7	48	0.145833	0.721903	0.429681	1	1	MFP1_ARATH	PULA1_ARATH	SSY4_ARATH	GLGB2_ARATH	GLGL1_ARATH	GLGL2_ARATH	GLGS_ARATH
biological_process	GO:0009846	pollen germination	7	63	0.111111	0.538189	0.618245	1	1	NPG1_ARATH	JGB_ARATH	IP5PC_ARATH	FIMB5_ARATH	CSLD1_ARATH	BECN1_ARATH	CALS5_ARATH
molecular_function	GO:0004721	phosphoprotein phosphatase activity	7	36	0.194444	0.0301475	0.982527	0.997	1	FH14_ARATH	FH18_ARATH	FH20_ARATH	F4JU71_ARATH	A0A1P8BD84_ARATH	A0A1P8BD82_ARATH	F4KHG9_ARATH
cellular_component	GO:0019898	extrinsic component of membrane	7	46	0.152174	0.733575	0.373614	1	1	ATG11_ARATH	AT18D_ARATH	AT13A_ARATH	AT18A_ARATH	A0A1I9LQ65_ARATH	F4JNE2_ARATH	A0A1P8BEE1_ARATH
biological_process	GO:0000045	autophagosome assembly	7	22	0.318182	0.999593	0.00159707	1	0.802	ATG11_ARATH	ATG7_ARATH	BECN1_ARATH	PUX6_ARATH	ATG16_ARATH	F4J0P2_ARATH	F4IXZ6_ARATH
biological_process	GO:0055046	microgametogenesis	7	23	0.304348	0.998118	0.00518703	1	0.999	LRL1_ARATH	LRL2_ARATH	KN12A_ARATH	KN12B_ARATH	RHF1A_ARATH	RHF2A_ARATH	MYB35_ARATH
biological_process	GO:0000122	negative regulation of transcription by RNA polymerase II	7	44	0.159091	0.863053	0.252592	1	1	SLK3_ARATH	SLK1_ARATH	SNL4_ARATH	ELF3_ARATH	SEUSS_ARATH	SIR1_ARATH	Q8GWP1_ARATH
molecular_function	GO:0008233	peptidase activity	7	116	0.0603448	0.0563263	0.955024	1	1	ESP1_ARATH	DA1_ARATH	LTG26_ARATH	Q9FIS4_ARATH	F4J7U9_ARATH	F4JVD6_ARATH	F4K306_ARATH
biological_process	GO:0010311	lateral root formation	7	53	0.132075	0.721903	0.429681	1	1	GNOM_ARATH	CTU2_ARATH	ARFS_ARATH	BIG_ARATH	ARFG_ARATH	AIL7_ARATH	F4KGW7_ARATH
cellular_component	GO:0016604	nuclear body	7	27	0.259259	0.983295	0.030076	1	1	PHYA_ARATH	PHYB_ARATH	NRPE1_ARATH	IQD18_ARATH	PHL_ARATH	Y14_ARATH	Q67ZZ1_ARATH
biological_process	GO:0009584	detection of visible light	7	7	1	1	3.01503e-07	1	0	PHYA_ARATH	PHYB_ARATH	PHYC_ARATH	PHYD_ARATH	PHYE_ARATH	A0A1P8AVD9_ARATH	A0A178VXX1_ARATH
biological_process	GO:0015979	photosynthesis	7	129	0.0542636	0.00042854	0.999805	0.164	1	PHYB_ARATH	CAPP4_ARATH	HMOX2_ARATH	Q9FHL4_ARATH	F4IUM0_ARATH	A0A1P8B2J8_ARATH	F4IUL9_ARATH
cellular_component	GO:0005797	Golgi medial cisterna	7	58	0.12069	0.683507	0.471673	1	1	COBL2_ARATH	PMTQ_ARATH	GOS12_ARATH	MGAT1_ARATH	PMTP_ARATH	PMTO_ARATH	F4IKG5_ARATH
molecular_function	GO:0045330	aspartyl esterase activity	7	80	0.0875	0.259759	0.84642	1	1	PME47_ARATH	PME41_ARATH	PME51_ARATH	PME7_ARATH	PME53_ARATH	PME25_ARATH	A0A178UA07_ARATH
molecular_function	GO:0030599	pectinesterase activity	7	104	0.0673077	0.0662113	0.968671	1	1	PME47_ARATH	PME41_ARATH	PME51_ARATH	PME7_ARATH	PME53_ARATH	PME25_ARATH	A0A178UA07_ARATH
biological_process	GO:0042545	cell wall modification	7	90	0.0777778	0.0174157	0.991936	1	1	PME47_ARATH	PME41_ARATH	PME51_ARATH	PME7_ARATH	PME53_ARATH	PME25_ARATH	A0A178UA07_ARATH
molecular_function	GO:0005198	structural molecule activity	7	39	0.179487	3.41727e-08	1	0	1	COPB2_ARATH	COPA2_ARATH	SC31B_ARATH	COPA1_ARATH	CLC3_ARATH	COPB1_ARATH	A0A1P8B4C2_ARATH
molecular_function	GO:0015211	purine nucleoside transmembrane transporter activity	7	24	0.291667	0.99526	0.0176681	1	1	PUP7_ARATH	PUP20_ARATH	PUP22_ARATH	PUP21_ARATH	PUP8_ARATH	PUP12_ARATH	A0A2H1ZE88_ARATH
cellular_component	GO:0000138	Golgi trans cisterna	7	85	0.0823529	0.256188	0.848692	1	1	MGP4_ARATH	PR1B2_ARATH	PMTA_ARATH	TBL17_ARATH	Y1720_ARATH	Q9LK30_ARATH	Q9T069_ARATH
molecular_function	GO:0015297	antiporter activity	7	153	0.0457516	0.00024398	0.999906	0.03	1	UTR5B_ARATH	UXT2_ARATH	UXT3_ARATH	CCX1_ARATH	DTX34_ARATH	DTX44_ARATH	DTX31_ARATH
biological_process	GO:0009965	leaf morphogenesis	7	53	0.132075	0.482383	0.635875	1	1	VCS_ARATH	LBD36_ARATH	BLI_ARATH	BRE1A_ARATH	BRE1B_ARATH	PDS5B_ARATH	AGO1_ARATH
biological_process	GO:0080147	root hair cell development	7	33	0.212121	0.94651	0.0911094	1	1	SCY2B_ARATH	LRL1_ARATH	LRL2_ARATH	HLB1_ARATH	CMKMT_ARATH	Y5613_ARATH	Q6NKR6_ARATH
molecular_function	GO:0005085	guanyl-nucleotide exchange factor activity	7	57	0.122807	0.643814	0.514373	1	1	BIG2_ARATH	BIG4_ARATH	GNOM_ARATH	PRAF1_ARATH	BIG5_ARATH	O49733_ARATH	A0A1P8B4J7_ARATH
biological_process	GO:0042542	response to hydrogen peroxide	7	66	0.106061	0.476746	0.665155	1	1	M2K1_ARATH	AB14G_ARATH	WRK30_ARATH	WRK53_ARATH	ARS1_ARATH	ALDO4_ARATH	GIGAN_ARATH
biological_process	GO:0007131	reciprocal meiotic recombination	7	40	0.175	0.997155	0.00720676	1	1	GRIP_ARATH	MLH3_ARATH	SYCP1_ARATH	Y4759_ARATH	Y3293_ARATH	NBS1_ARATH	F4JIJ1_ARATH
biological_process	GO:0030422	production of siRNA involved in RNA interference	7	27	0.259259	0.999069	0.00307293	1	0.97	NRPE1_ARATH	DCL2_ARATH	DCL3_ARATH	NRPD2_ARATH	A0A1P8B4K5_ARATH	F4I526_ARATH	F4JHB3_ARATH
biological_process	GO:0010628	positive regulation of gene expression	7	28	0.25	0.807866	0.290966	1	1	GAI_ARATH	BZP30_ARATH	Y14_ARATH	RGA_ARATH	MED23_ARATH	Q9LSI1_ARATH	B3H7M2_ARATH
molecular_function	GO:0008143	poly(A) binding	7	25	0.28	0.993739	0.0221042	1	1	PABP1_ARATH	PABP5_ARATH	RP45C_ARATH	RB47B_ARATH	R47BP_ARATH	Q9LTX1_ARATH	F4J9U9_ARATH
molecular_function	GO:0004497	monooxygenase activity	7	261	0.0268199	6.85924e-13	1	0	1	C71B5_ARATH	C70B3_ARATH	F4JLY4_ARATH	O49373_ARATH	Q9ZQN9_ARATH	F4HQ70_ARATH	A0A1P8B8D9_ARATH
cellular_component	GO:0031410	cytoplasmic vesicle	7	50	0.14	0.931745	0.0829764	1	1	ATG11_ARATH	PLA2A_ARATH	PLDZ1_ARATH	AT13A_ARATH	ATG1B_ARATH	ATG1C_ARATH	E70A1_ARATH
biological_process	GO:0006869	lipid transport	7	112	0.0625	0.400844	0.684488	1	1	ATG9_ARATH	AB5A_ARATH	C2D61_ARATH	LTG26_ARATH	VPS51_ARATH	Q8GX11_ARATH	F4JH69_ARATH
cellular_component	GO:0005770	late endosome	7	40	0.175	0.822339	0.272576	1	1	SYP21_ARATH	VSR1_ARATH	VP35B_ARATH	VPS2A_ARATH	AMSH3_ARATH	BRO1_ARATH	F4JHM9_ARATH
molecular_function	GO:0005484	SNAP receptor activity	7	67	0.104478	0.459532	0.688961	1	1	SYP21_ARATH	SYP22_ARATH	SYP31_ARATH	SYP32_ARATH	GOS12_ARATH	Q6NKR3_ARATH	F4J6K6_ARATH
cellular_component	GO:0031965	nuclear membrane	7	48	0.145833	0.596036	0.562177	1	1	TRP1_ARATH	CRWN4_ARATH	NUA_ARATH	POLLU_ARATH	AUR1_ARATH	A0A1P8BDJ3_ARATH	A0A1P8BDK3_ARATH
biological_process	GO:0006099	tricarboxylic acid cycle	7	69	0.101449	0.431195	0.713162	1	1	CAPP4_ARATH	ODO2B_ARATH	FUM1_ARATH	FUM2_ARATH	CISY2_ARATH	Q9FLH2_ARATH	F4IWV2_ARATH
biological_process	GO:0009735	response to cytokinin	7	54	0.12963	0.876364	0.18389	1	1	DRB1_ARATH	RAP23_ARATH	SAG12_ARATH	TCP14_ARATH	TCP15_ARATH	1A15_ARATH	Q8GZ96_ARATH
biological_process	GO:0006811	ion transport	7	34	0.205882	0.0283603	0.979232	1	1	FRO5_ARATH	FRO4_ARATH	POLLU_ARATH	AB25B_ARATH	AB23B_ARATH	A0A1P8BDJ3_ARATH	A0A1P8BDK3_ARATH
biological_process	GO:0009903	chloroplast avoidance movement	7	24	0.291667	0.99542	0.017176	1	1	PMIR1_ARATH	KN14A_ARATH	WEB1_ARATH	Y5586_ARATH	WEL1_ARATH	JAC1_ARATH	Q9C6F8_ARATH
molecular_function	GO:0051287	NAD binding	7	89	0.0786517	0.129527	0.927185	1	1	MAOP4_ARATH	GLYR2_ARATH	A0A1P8AVD8_ARATH	A0A1P8AS42_ARATH	Q8VYC5_ARATH	B3H739_ARATH	F4IAP5_ARATH
biological_process	GO:0055072	iron ion homeostasis	7	47	0.148936	0.948272	0.0955151	1	1	BH115_ARATH	FREE1_ARATH	BH047_ARATH	IRT3_ARATH	AB1K7_ARATH	A0A1P8AWE8_ARATH	F4I7Z3_ARATH
cellular_component	GO:0000786	nucleosome	7	60	0.116667	0.648797	0.508599	1	1	TRB4_ARATH	DDM1_ARATH	HTR12_ARATH	Q9LSK7_ARATH	A0A178WHA3_ARATH	A0A178WID5_ARATH	A0A1P8AQ25_ARATH
biological_process	GO:0046856	phosphatidylinositol dephosphorylation	7	48	0.145833	0.805302	0.329701	1	1	IP5PC_ARATH	IP5PE_ARATH	SAC4_ARATH	SAC8_ARATH	A0A1P8AX44_ARATH	A0A1P8AZ51_ARATH	F4IRT2_ARATH
cellular_component	GO:0005680	anaphase-promoting complex	7	32	0.21875	0.97866	0.0587002	1	1	CDC24_ARATH	CDC21_ARATH	CD203_ARATH	FZR1_ARATH	FZR2_ARATH	FZR3_ARATH	CDC22_ARATH
molecular_function	GO:0010997	anaphase-promoting complex binding	7	10	0.7	0.999999	2.71786e-05	1	0.012	CDC24_ARATH	CDC21_ARATH	CD203_ARATH	FZR1_ARATH	FZR2_ARATH	FZR3_ARATH	CDC22_ARATH
molecular_function	GO:1990757	ubiquitin ligase activator activity	7	9	0.777778	1	9.08495e-06	1	0.005	CDC24_ARATH	CDC21_ARATH	CD203_ARATH	FZR1_ARATH	FZR2_ARATH	FZR3_ARATH	CDC22_ARATH
biological_process	GO:0031145	anaphase-promoting complex-dependent catabolic process	7	25	0.28	0.993946	0.0215013	1	1	CDC24_ARATH	CDC21_ARATH	CD203_ARATH	FZR1_ARATH	FZR2_ARATH	FZR3_ARATH	CDC22_ARATH
biological_process	GO:1905786	positive regulation of anaphase-promoting complex-dependent catabolic process	7	9	0.777778	1	8.74886e-06	1	0.007	CDC24_ARATH	CDC21_ARATH	CD203_ARATH	FZR1_ARATH	FZR2_ARATH	FZR3_ARATH	CDC22_ARATH
biological_process	GO:0070417	cellular response to cold	7	34	0.205882	0.991524	0.0242503	1	1	GLR34_ARATH	GNOM_ARATH	AHK3_ARATH	RQL1_ARATH	VIN3_ARATH	AHK2_ARATH	CMTA3_ARATH
biological_process	GO:0042026	protein refolding	7	38	0.184211	0.920699	0.16582	1	1	DNAJ1_ARATH	CPNB1_ARATH	CPNB4_ARATH	GFA2_ARATH	A0A1P8ATB3_ARATH	A0A2H1ZEC4_ARATH	A0A1P8ATA4_ARATH
biological_process	GO:0051013	microtubule severing	7	8	0.875	1	2.16529e-06	1	0.005	KTN82_ARATH	KTN83_ARATH	KTN84_ARATH	KTN81_ARATH	A0A1P8AW68_ARATH	A0A1P8AW58_ARATH	F4I7E1_ARATH
molecular_function	GO:0005262	calcium channel activity	7	38	0.184211	0.908325	0.18558	1	1	GLR34_ARATH	GLR23_ARATH	MCAC1_ARATH	GLR27_ARATH	GLR28_ARATH	GLR21_ARATH	GLR29_ARATH
biological_process	GO:0071230	cellular response to amino acid stimulus	7	22	0.318182	0.997534	0.0104268	1	1	GLR34_ARATH	GLR23_ARATH	GLR27_ARATH	GLR28_ARATH	RTOR2_ARATH	GLR21_ARATH	GLR29_ARATH
biological_process	GO:0016573	histone acetylation	7	29	0.241379	0.996582	0.00821852	1	1	HAC1_ARATH	HAC4_ARATH	HAC5_ARATH	HAC12_ARATH	MBD9_ARATH	TAF1B_ARATH	O64877_ARATH
molecular_function	GO:0003725	double-stranded RNA binding	7	23	0.304348	0.99526	0.0176681	1	1	DRB1_ARATH	DCL3_ARATH	BH140_ARATH	TAD1_ARATH	FDM1_ARATH	RNC1_ARATH	A0A1P8AQD8_ARATH
biological_process	GO:0040029	regulation of gene expression, epigenetic	7	22	0.318182	0.998819	0.00378237	1	0.99	DDM1_ARATH	MOS1_ARATH	SYD_ARATH	XRN4_ARATH	BRM_ARATH	ASHH2_ARATH	A0A1R7T397_ARATH
molecular_function	GO:0050136	NADH dehydrogenase (quinone) activity	7	18	0.388889	0.606475	0.552373	1	1	NDB2_ARATH	NDB4_ARATH	FQRL1_ARATH	FQRL2_ARATH	A0A1P8B767_ARATH	A0A1P8B765_ARATH	F4JGL5_ARATH
biological_process	GO:0019509	L-methionine salvage from methylthioadenosine	7	26	0.269231	0.992139	0.0265266	1	1	MTK_ARATH	MTBC_ARATH	A0A1P8BAY5_ARATH	F4JYQ6_ARATH	F4JYQ5_ARATH	A0A1P8BAY8_ARATH	A0A178UQC1_ARATH
molecular_function	GO:0004565	beta-galactosidase activity	7	42	0.166667	0.885504	0.220265	1	1	BGA11_ARATH	BGA14_ARATH	BGAL6_ARATH	BGAL8_ARATH	BGAL4_ARATH	F4IIQ3_ARATH	F4JUE3_ARATH
molecular_function	GO:0042973	glucan endo-1,3-beta-D-glucosidase activity	7	70	0.1	0.407916	0.732585	1	1	E1313_ARATH	E133_ARATH	A8MRK0_ARATH	Q8GYS2_ARATH	Q9SRT4_ARATH	A0A1P8AXY5_ARATH	F4IKB3_ARATH
cellular_component	GO:0008352	katanin complex	7	7	1	1	2.11459e-07	1	0	KTN82_ARATH	KTN83_ARATH	KTN84_ARATH	KTN81_ARATH	A0A1P8AW68_ARATH	A0A1P8AW58_ARATH	F4I7E1_ARATH
molecular_function	GO:0004045	aminoacyl-tRNA hydrolase activity	7	14	0.5	0.999943	0.000505405	1	0.241	PTHC_ARATH	A0A1P8BD66_ARATH	A0A1P8B4F4_ARATH	Q9FT62_ARATH	F4JV77_ARATH	F4JV78_ARATH	A0A1P8APF1_ARATH
biological_process	GO:0007020	microtubule nucleation	7	19	0.368421	0.997534	0.0104268	1	1	GACP2_ARATH	GACP3_ARATH	GACP4_ARATH	TBG2_ARATH	TBG1_ARATH	A0A1I9LLT7_ARATH	A0A1I9LLT8_ARATH
biological_process	GO:0034090	maintenance of meiotic sister chromatid cohesion	7	10	0.7	0.999996	6.46958e-05	1	0.091	SGO1_ARATH	SGO2_ARATH	A0A1I9LQA4_ARATH	A0A1I9LT08_ARATH	F4J4B9_ARATH	A0A1P8BFE9_ARATH	A0A1I9LT11_ARATH
biological_process	GO:0043328	protein transport to vacuole involved in ubiquitin-dependent protein catabolic process via the multivesicular body sorting pathway	7	21	0.333333	0.998253	0.00789394	1	1	TOL7_ARATH	TOL5_ARATH	TOL6_ARATH	TOL9_ARATH	BRO1_ARATH	A0A1P8B8V4_ARATH	F4JV51_ARATH
biological_process	GO:0006950	response to stress	7	31	0.225806	0.992064	0.00913567	1	1	Q9FLK5_ARATH	Q9SR48_ARATH	Q9C8G3_ARATH	A0A1P8BA14_ARATH	A0A1P8BA00_ARATH	F4HTN8_ARATH	F4HZN9_ARATH
cellular_component	GO:0110165	cellular anatomical entity	7	108	0.0648148	0.908941	0.142894	1	1	Q6NQI6_ARATH	Q8GUK2_ARATH	A0A1I9LTD0_ARATH	A0A1I9LPC2_ARATH	A0A178V7S6_ARATH	A0A1P8AXG2_ARATH	F4JJU7_ARATH
biological_process	GO:0006139	nucleobase-containing compound metabolic process	7	10	0.7	1	1.19029e-30	1	0	A0A1P8APW8_ARATH	A0A1P8AQ29_ARATH	A0A1P8AQ53_ARATH	Q9CA92_ARATH	A0A1P8AQ45_ARATH	A0A1P8APW6_ARATH	F4HUN4_ARATH
biological_process	GO:0042023	DNA endoreduplication	6	26	0.230769	0.99163	0.0199151	1	1	FZR2_ARATH	E2FC_ARATH	RHL1_ARATH	TCP15_ARATH	DPB_ARATH	E2FE_ARATH
cellular_component	GO:0022626	cytosolic ribosome	6	197	0.0304569	1.33075e-08	1	0	1	CPNB1_ARATH	RK4_ARATH	PSA6B_ARATH	ZFP6_ARATH	NACA1_ARATH	NACA3_ARATH
biological_process	GO:0042538	hyperosmotic salinity response	6	54	0.111111	0.491582	0.671646	1	1	GAI_ARATH	AZF2_ARATH	EHD1_ARATH	RGA_ARATH	CESA1_ARATH	EMF1_ARATH
biological_process	GO:0010073	meristem maintenance	6	39	0.153846	0.737584	0.33965	1	1	MAIL2_ARATH	JHS1_ARATH	PLET2_ARATH	LUH_ARATH	LEUNG_ARATH	F4I6L3_ARATH
cellular_component	GO:0005811	lipid droplet	6	50	0.12	0.198473	0.893398	1	1	PEN6_ARATH	PEN7_ARATH	SCPDL_ARATH	LAS1_ARATH	PLA12_ARATH	A0A1I9LTE4_ARATH
biological_process	GO:0046854	phosphatidylinositol phosphate biosynthetic process	6	19	0.315789	0.994155	0.0233527	1	1	FAB1A_ARATH	FAB1B_ARATH	FAB1C_ARATH	FAB1D_ARATH	P4KA1_ARATH	A0A1P8AWA3_ARATH
biological_process	GO:0001666	response to hypoxia	6	39	0.153846	0.039481	0.975475	1	1	LUH_ARATH	SEUSS_ARATH	VIN3_ARATH	MYB30_ARATH	LEUNG_ARATH	F4JUW0_ARATH
biological_process	GO:0034976	response to endoplasmic reticulum stress	6	33	0.181818	0.782797	0.3061	1	1	PDI11_ARATH	PDI12_ARATH	UFL1_ARATH	Q5PP35_ARATH	B9DH97_ARATH	F4J517_ARATH
biological_process	GO:0009567	double fertilization forming a zygote and endosperm	6	80	0.075	0.166684	0.909322	1	1	HAP2_ARATH	KPL_ARATH	HTR12_ARATH	ACA9_ARATH	NFYA2_ARATH	Q9T0H6_ARATH
biological_process	GO:0009638	phototropism	6	24	0.25	0.982824	0.0541288	1	1	PHYA_ARATH	PHYB_ARATH	PKS1_ARATH	PIF4_ARATH	ARFG_ARATH	Q9LZS4_ARATH
biological_process	GO:0017006	protein-tetrapyrrole linkage	6	6	1	1	8.74886e-06	1	0.007	PHYA_ARATH	PHYC_ARATH	PHYD_ARATH	PHYE_ARATH	A0A1P8AVD9_ARATH	A0A178VXX1_ARATH
cellular_component	GO:0005938	cell cortex	6	37	0.162162	0.928195	0.113092	1	1	GACP2_ARATH	GACP3_ARATH	TBG2_ARATH	TBG1_ARATH	CLASP_ARATH	F4KB73_ARATH
biological_process	GO:0008643	carbohydrate transport	6	121	0.0495868	0.00827354	0.996706	0.969	1	UTR5B_ARATH	UXT2_ARATH	UXT3_ARATH	A0A1P8B177_ARATH	F4HNU3_ARATH	A0A1P8ANY9_ARATH
cellular_component	GO:0030127	COPII vesicle coat	6	22	0.272727	0.992066	0.0294482	1	1	SC24A_ARATH	SC24B_ARATH	SC31B_ARATH	Q8VXX0_ARATH	Q9SIJ7_ARATH	F4JUM1_ARATH
biological_process	GO:0048653	anther development	6	38	0.157895	0.493581	0.650019	1	1	LOX4_ARATH	LOX3_ARATH	TGA9_ARATH	TGA10_ARATH	MYB65_ARATH	ASHH2_ARATH
biological_process	GO:0010017	red or far-red light signaling pathway	6	24	0.25	0.999998	7.19631e-06	1	0.006	FHY3_ARATH	FAR1_ARATH	PIL1_ARATH	PIF3_ARATH	PKS1_ARATH	PIF4_ARATH
molecular_function	GO:0015293	symporter activity	6	78	0.0769231	0.116425	0.935539	1	1	PHT21_ARATH	ANTR1_ARATH	PTR47_ARATH	AAP2_ARATH	AAP4_ARATH	AAP7_ARATH
biological_process	GO:0051693	actin filament capping	6	13	0.461538	0.999481	0.0029623	1	0.969	VILI2_ARATH	VILI3_ARATH	VILI1_ARATH	A0A1P8AZB7_ARATH	F4ILN8_ARATH	Q2V445_ARATH
biological_process	GO:0031087	deadenylation-independent decapping of nuclear-transcribed mRNA	6	8	0.75	0.999998	5.84542e-05	1	0.078	VCR_ARATH	VCS_ARATH	DCP5L_ARATH	DCP1_ARATH	XRN4_ARATH	A0A1I9LRS8_ARATH
biological_process	GO:0006730	one-carbon metabolic process	6	41	0.146341	0.756476	0.3896	1	1	SAHH1_ARATH	SAHH2_ARATH	A0A1P8B0G7_ARATH	Q9ZUP9_ARATH	A8MQP1_ARATH	F4JTV4_ARATH
biological_process	GO:0036297	interstrand cross-link repair	6	28	0.214286	0.984286	0.0462033	1	1	RTEL1_ARATH	SM3L2_ARATH	Q9LZR4_ARATH	Q9LZE2_ARATH	F4IDZ7_ARATH	F4JIJ1_ARATH
biological_process	GO:0045910	negative regulation of DNA recombination	6	20	0.3	0.99542	0.017176	1	1	RTEL1_ARATH	Q9LSK7_ARATH	Q9SS53_ARATH	A0A1P8AMZ6_ARATH	F4I9U0_ARATH	F4JYU0_ARATH
biological_process	GO:0009294	DNA mediated transformation	6	25	0.24	0.978499	0.0644323	1	1	SM3L2_ARATH	DDM1_ARATH	GTE7_ARATH	GTE4_ARATH	ATX5_ARATH	F4IDH2_ARATH
molecular_function	GO:0032549	ribonucleoside binding	6	9	0.666667	0.999991	0.000162894	1	0.093	RPD2B_ARATH	NRPC2_ARATH	NRPD2_ARATH	A0A1I9LNQ9_ARATH	A0A1P8BFS9_ARATH	A0A1I9LNQ8_ARATH
biological_process	GO:0006306	DNA methylation	6	20	0.3	0.999108	0.00280758	1	0.967	NRPE1_ARATH	DME_ARATH	ROS1_ARATH	NRPD2_ARATH	ET1_ARATH	DMS3_ARATH
biological_process	GO:0010492	maintenance of shoot apical meristem identity	6	21	0.285714	0.992106	0.0295363	1	1	FZR1_ARATH	RTOR2_ARATH	ANT_ARATH	AGO7_ARATH	AIL7_ARATH	F4KGW7_ARATH
biological_process	GO:0006470	protein dephosphorylation	6	61	0.0983607	0.0688902	0.9644	1	1	P2C43_ARATH	P2C04_ARATH	2AAA_ARATH	2AAB_ARATH	2AAG_ARATH	F4KHG9_ARATH
molecular_function	GO:0008266	poly(U) RNA binding	6	29	0.206897	0.952612	0.118494	1	1	PABP1_ARATH	RK4_ARATH	PABP5_ARATH	RH55_ARATH	F4I5Z7_ARATH	F4JAF3_ARATH
biological_process	GO:0006996	organelle organization	6	17	0.352941	1	2.63767e-19	1	0	REC1_ARATH	REC2_ARATH	REC3_ARATH	F4HS98_ARATH	A0A1P8AR50_ARATH	A0A1P8ATX7_ARATH
molecular_function	GO:0080115	myosin XI tail binding	6	24	0.25	0.982332	0.0553551	1	1	F4JWA1_ARATH	Q9LZN4_ARATH	Q9SF14_ARATH	F4JT43_ARATH	Q9C8R6_ARATH	Q1PE31_ARATH
cellular_component	GO:0005769	early endosome	6	34	0.176471	0.865974	0.247923	1	1	HLB1_ARATH	NIPA6_ARATH	SIK1_ARATH	TR120_ARATH	TOL6_ARATH	BIG5_ARATH
biological_process	GO:0051603	proteolysis involved in cellular protein catabolic process	6	51	0.117647	0.915193	0.104654	1	1	SAG12_ARATH	RHF2A_ARATH	RD19C_ARATH	ASY1_ARATH	F4KIN7_ARATH	F4IWI5_ARATH
biological_process	GO:0006890	retrograde vesicle-mediated transport, Golgi to endoplasmic reticulum	6	41	0.146341	0.801145	0.347453	1	1	COPA2_ARATH	MIP2_ARATH	VP53A_ARATH	COPA1_ARATH	Q6NKR3_ARATH	F4KH34_ARATH
biological_process	GO:0000184	nuclear-transcribed mRNA catabolic process, nonsense-mediated decay	6	23	0.26087	0.998552	0.00605361	1	1	RENT1_ARATH	RH40_ARATH	SMG7_ARATH	RENT3_ARATH	RH14_ARATH	Y14_ARATH
cellular_component	GO:0000124	SAGA complex	6	28	0.214286	0.96952	0.0840088	1	1	TAF9_ARATH	PHL_ARATH	TAF12_ARATH	TA12B_ARATH	F4JPL2_ARATH	F4IPJ1_ARATH
cellular_component	GO:0031201	SNARE complex	6	56	0.107143	0.565913	0.603349	1	1	SYP21_ARATH	SYP22_ARATH	SYP31_ARATH	SYP32_ARATH	GOS12_ARATH	Q6NKR3_ARATH
biological_process	GO:0045324	late endosome to vacuole transport	6	20	0.3	0.997913	0.00592233	1	1	SYP21_ARATH	SYP22_ARATH	BECN1_ARATH	SNX2B_ARATH	VPS2A_ARATH	Q8LPK7_ARATH
biological_process	GO:0052324	plant-type cell wall cellulose biosynthetic process	6	13	0.461538	0.999679	0.00201215	1	0.924	CSI3_ARATH	COBL2_ARATH	STL1_ARATH	COBL4_ARATH	COBL6_ARATH	COBL1_ARATH
molecular_function	GO:0043022	ribosome binding	6	50	0.12	0.604856	0.566279	1	1	ILA_ARATH	EF2_ARATH	Q9M1Q0_ARATH	A0A1P8AT97_ARATH	F4KFX1_ARATH	F4I3J0_ARATH
biological_process	GO:0048573	photoperiodism, flowering	6	45	0.133333	0.7884	0.293978	1	1	ELF3_ARATH	NU98B_ARATH	MBD9_ARATH	NAC40_ARATH	GLGS_ARATH	F4IDH2_ARATH
biological_process	GO:0006635	fatty acid beta-oxidation	6	33	0.181818	0.747408	0.41312	1	1	MFP2_ARATH	PEX6_ARATH	AB2D_ARATH	ECH2_ARATH	AB1D_ARATH	CISY2_ARATH
biological_process	GO:0042631	cellular response to water deprivation	6	38	0.157895	0.849709	0.282872	1	1	GTL1_ARATH	MGL_ARATH	SMXL4_ARATH	RQL1_ARATH	UBC33_ARATH	AB40G_ARATH
biological_process	GO:0000902	cell morphogenesis	6	23	0.26087	0.999647	0.000568592	1	0.468	PIR_ARATH	E2FC_ARATH	F4KB73_ARATH	Q940S9_ARATH	F4J4K6_ARATH	A0A1P8B7W9_ARATH
biological_process	GO:0032508	DNA duplex unwinding	6	17	0.352941	0.997294	0.00933045	1	1	RTEL1_ARATH	RECQ2_ARATH	RQL1_ARATH	RQL3_ARATH	NBS1_ARATH	Q9CA92_ARATH
biological_process	GO:0009693	ethylene biosynthetic process	6	23	0.26087	0.980718	0.0543966	1	1	PIF5_ARATH	SWTIE_ARATH	UBA2A_ARATH	UBA2C_ARATH	UBA2B_ARATH	1A15_ARATH
biological_process	GO:0048768	root hair cell tip growth	6	22	0.272727	0.989573	0.0367023	1	1	HLB1_ARATH	KIP_ARATH	SCL6_ARATH	TBG2_ARATH	TBG1_ARATH	F4HYH6_ARATH
biological_process	GO:0006508	proteolysis	6	72	0.0833333	0.755359	0.278784	1	1	DGP10_ARATH	FTSH5_ARATH	CRSP_ARATH	AARE_ARATH	APA1_ARATH	FTSH1_ARATH
biological_process	GO:0042127	regulation of cell population proliferation	6	23	0.26087	0.899058	0.165017	1	1	TIF4A_ARATH	MCM2_ARATH	SIK1_ARATH	RHM1_ARATH	ANT_ARATH	ABAP1_ARATH
biological_process	GO:0009904	chloroplast accumulation movement	6	28	0.214286	0.961156	0.101705	1	1	KN14A_ARATH	WEB1_ARATH	Y5586_ARATH	WEL1_ARATH	JAC1_ARATH	Q9C6F8_ARATH
biological_process	GO:0009755	hormone-mediated signaling pathway	6	30	0.2	0.86614	0.155407	1	1	MIK2_ARATH	LBD31_ARATH	Y1571_ARATH	BAME3_ARATH	MYB29_ARATH	Q9LRX5_ARATH
molecular_function	GO:0050660	flavin adenine dinucleotide binding	6	124	0.0483871	0.218143	0.840806	1	1	DUS3L_ARATH	GSXL7_ARATH	IBR3_ARATH	GSXL4_ARATH	FAO4B_ARATH	Q9FH91_ARATH
biological_process	GO:0007064	mitotic sister chromatid cohesion	6	24	0.25	0.93656	0.147997	1	1	PDS5B_ARATH	SCC11_ARATH	SMC1_ARATH	F4JV27_ARATH	F4I737_ARATH	F4I736_ARATH
biological_process	GO:0009627	systemic acquired resistance	6	56	0.107143	0.607092	0.520092	1	1	CPNB1_ARATH	CRK9_ARATH	MED14_ARATH	NUP88_ARATH	WRK33_ARATH	AED1_ARATH
molecular_function	GO:0043138	3'-5' DNA helicase activity	6	19	0.315789	0.995645	0.0185635	1	1	RECQ2_ARATH	RQL1_ARATH	RQL3_ARATH	DEXHE_ARATH	A0A1P8AV94_ARATH	A0A1P8AVA5_ARATH
biological_process	GO:0006268	DNA unwinding involved in DNA replication	6	20	0.3	0.994155	0.0233527	1	1	RECQ2_ARATH	MCM2_ARATH	RQL1_ARATH	RQL3_ARATH	MCM6_ARATH	F4HPK7_ARATH
cellular_component	GO:0005776	autophagosome	6	26	0.230769	0.978744	0.054747	1	1	ATG9_ARATH	ATG11_ARATH	AT13A_ARATH	ATG1B_ARATH	ATG1C_ARATH	Q9S781_ARATH
biological_process	GO:0032456	endocytic recycling	6	11	0.545455	0.999989	0.000139502	1	0.174	EHD1_ARATH	VPS51_ARATH	A0A1P8ATR6_ARATH	F4JH69_ARATH	A0A1P8ATS8_ARATH	F4I6L0_ARATH
cellular_component	GO:0055028	cortical microtubule	6	33	0.181818	0.752077	0.406979	1	1	CSI3_ARATH	IQD5_ARATH	GACP2_ARATH	GACP3_ARATH	WDL7_ARATH	Q9C6N3_ARATH
cellular_component	GO:0035861	site of double-strand break	6	10	0.6	0.999981	0.000267932	1	0.054	MRE11_ARATH	POLH_ARATH	RFA2A_ARATH	RFA2B_ARATH	Q9SK69_ARATH	Q709F6_ARATH
molecular_function	GO:0016788	hydrolase activity, acting on ester bonds	6	137	0.0437956	0.00768134	0.993961	0.771	1	PPA28_ARATH	PPA29_ARATH	Q8RU07_ARATH	A0A1P8BHE5_ARATH	A0A1P8BHE7_ARATH	F4IMR0_ARATH
biological_process	GO:0051510	regulation of unidimensional cell growth	6	20	0.3	0.964197	0.0681063	1	1	KTN82_ARATH	KTN83_ARATH	KTN84_ARATH	KTN81_ARATH	F4I9T6_ARATH	F4JAV9_ARATH
molecular_function	GO:0008810	cellulase activity	6	38	0.157895	0.846614	0.287206	1	1	GUN18_ARATH	GUN19_ARATH	GUN20_ARATH	GUN22_ARATH	A0A1P8B3K9_ARATH	A0A1P8B3L0_ARATH
biological_process	GO:0030245	cellulose catabolic process	6	37	0.162162	0.86452	0.261938	1	1	GUN18_ARATH	GUN19_ARATH	GUN20_ARATH	GUN22_ARATH	A0A1P8B3K9_ARATH	A0A1P8B3L0_ARATH
molecular_function	GO:0016705	oxidoreductase activity, acting on paired donors, with incorporation or reduction of molecular oxygen	6	243	0.0246914	8.71775e-14	1	0	1	C71B5_ARATH	C70B3_ARATH	F4JLY4_ARATH	O49373_ARATH	F4HQ70_ARATH	A0A1P8B8D9_ARATH
biological_process	GO:0006400	tRNA modification	6	36	0.166667	0.300969	0.800576	1	1	KTI12_ARATH	TAD1_ARATH	TAD3_ARATH	THG1_ARATH	THG2_ARATH	A0A1P8B2C6_ARATH
cellular_component	GO:0034045	phagophore assembly site membrane	6	15	0.4	0.999397	0.00389811	1	0.63	ATG9_ARATH	ATG11_ARATH	AT18F_ARATH	AT18D_ARATH	AT18A_ARATH	AT18G_ARATH
cellular_component	GO:0000151	ubiquitin ligase complex	6	61	0.0983607	0.727543	0.335528	1	1	ARI1_ARATH	UBE4_ARATH	PRT6_ARATH	UPL1_ARATH	ARI12_ARATH	Q9M1F1_ARATH
molecular_function	GO:0008066	glutamate receptor activity	6	20	0.3	0.977896	0.0658553	1	1	GLR34_ARATH	GLR23_ARATH	GLR27_ARATH	GLR28_ARATH	GLR21_ARATH	GLR29_ARATH
biological_process	GO:0007052	mitotic spindle organization	6	13	0.461538	0.998403	0.00555132	1	1	KN5A_ARATH	KN4C_ARATH	NUF2_ARATH	TBG2_ARATH	TBG1_ARATH	AUR1_ARATH
biological_process	GO:0000272	polysaccharide catabolic process	6	26	0.230769	0.482313	0.599709	1	1	CHI59_ARATH	CHI5_ARATH	XYL2_ARATH	CHI58_ARATH	Q6NQI6_ARATH	F4JJU7_ARATH
molecular_function	GO:0008139	nuclear localization sequence binding	6	19	0.315789	0.995645	0.0185635	1	1	IMPA4_ARATH	IMPA7_ARATH	IMPA6_ARATH	NP214_ARATH	NUP58_ARATH	TNPO1_ARATH
molecular_function	GO:0001228	DNA-binding transcription activator activity, RNA polymerase II-specific	6	35	0.171429	0.889437	0.225145	1	1	FHY3_ARATH	MB3R4_ARATH	NFYB8_ARATH	NFYBA_ARATH	Q9FMF3_ARATH	Q0WQM3_ARATH
biological_process	GO:0000160	phosphorelay signal transduction system	6	50	0.12	0.764559	0.296811	1	1	APRR3_ARATH	ARR13_ARATH	ARR21_ARATH	A0A1P8BEW7_ARATH	F4JXG7_ARATH	A0A1P8B286_ARATH
biological_process	GO:0009639	response to red or far red light	6	39	0.153846	0.982535	0.0269054	1	1	FAR1_ARATH	LAF1_ARATH	PIF3_ARATH	AB1B_ARATH	Q9LZZ5_ARATH	Q9MAG4_ARATH
molecular_function	GO:0004857	enzyme inhibitor activity	6	67	0.0895522	0.000134524	0.999948	0.018	1	Q2V441_ARATH	Q9FHN2_ARATH	Q9LJX2_ARATH	Q9FGA7_ARATH	Q9FGA4_ARATH	A0A178UA07_ARATH
cellular_component	GO:0015629	actin cytoskeleton	6	40	0.15	0.998292	0.00386827	1	0.619	MYO10_ARATH	MYO12_ARATH	MYO13_ARATH	MYO5_ARATH	MYO7_ARATH	F4ILN8_ARATH
biological_process	GO:0006813	potassium ion transport	6	57	0.105263	0.11664	0.943123	1	1	CCX1_ARATH	KEA3_ARATH	POT6_ARATH	SKI2_ARATH	CHX11_ARATH	F4JHE9_ARATH
cellular_component	GO:0005875	microtubule associated complex	6	15	0.4	1	4.8857e-14	1	0	TANB_ARATH	Y4759_ARATH	Y3293_ARATH	IQD32_ARATH	F4IRA9_ARATH	Q8GW47_ARATH
biological_process	GO:0048856	anatomical structure development	6	10	0.6	0.999997	4.1123e-06	1	0.005	ZWIP2_ARATH	ZWIP4_ARATH	ZWIP5_ARATH	ZWIP6_ARATH	A0A178VTI3_ARATH	A0A1P8B2Y3_ARATH
molecular_function	GO:0003680	minor groove of adenine-thymine-rich DNA binding	6	37	0.162162	0.861658	0.266076	1	1	AHL8_ARATH	AHL18_ARATH	AHL15_ARATH	AHL22_ARATH	AHL10_ARATH	Q9SJQ2_ARATH
biological_process	GO:0010390	histone monoubiquitination	6	6	1	1	2.57808e-06	1	0.005	BRE1A_ARATH	BRE1B_ARATH	F4I080_ARATH	A0A1P8APW2_ARATH	A0A1P8AYB9_ARATH	F4I079_ARATH
molecular_function	GO:0019104	DNA N-glycosylase activity	6	12	0.5	0.971083	0.0750936	1	1	DML2_ARATH	DML3_ARATH	DME_ARATH	ROS1_ARATH	B3H5X5_ARATH	A0A1P8B6V3_ARATH
molecular_function	GO:0035514	DNA demethylase activity	6	10	0.6	0.999943	0.000505405	1	0.241	DML2_ARATH	DML3_ARATH	DME_ARATH	ROS1_ARATH	B3H5X5_ARATH	A0A1P8B6V3_ARATH
biological_process	GO:0010033	response to organic substance	6	24	0.25	0.662891	0.363119	1	1	Q9FLK5_ARATH	Q9SR48_ARATH	Q9C8G3_ARATH	A0A1P8BA14_ARATH	A0A1P8BA00_ARATH	F4HTN8_ARATH
cellular_component	GO:0005839	proteasome core complex	6	30	0.2	0.989742	0.0301858	1	1	PSB7B_ARATH	PSB7A_ARATH	PSA6A_ARATH	PSA6B_ARATH	F4KIN7_ARATH	F4IWI5_ARATH
cellular_component	GO:0000938	GARP complex	6	11	0.545455	0.999954	0.000533776	1	0.115	VP53A_ARATH	VPS51_ARATH	VPS54_ARATH	A0A1P8ATX5_ARATH	A0A1P8ATZ0_ARATH	F4JH69_ARATH
biological_process	GO:1901700	response to oxygen-containing compound	6	22	0.272727	0.509339	0.52212	1	1	Q9FLK5_ARATH	Q9SR48_ARATH	Q9C8G3_ARATH	A0A1P8BA14_ARATH	A0A1P8BA00_ARATH	F4HTN8_ARATH
molecular_function	GO:0016790	thiolester hydrolase activity	6	7	0.857143	0.447627	0.709381	1	1	Q8L7H5_ARATH	Q9LVS6_ARATH	Q84JI7_ARATH	Q9LVS4_ARATH	Q9LY31_ARATH	F4JX42_ARATH
biological_process	GO:0048367	shoot system development	5	73	0.0684932	0.999993	1.052e-05	1	0.009	PEP_ARATH	ZWIP6_ARATH	EMF1_ARATH	F4J043_ARATH	F4I642_ARATH
biological_process	GO:0072583	clathrin-dependent endocytosis	5	38	0.131579	0.695846	0.488074	1	1	AUXI2_ARATH	AUL1_ARATH	JAC1_ARATH	CLC3_ARATH	Q9XI12_ARATH
molecular_function	GO:0004017	adenylate kinase activity	5	14	0.357143	0.996554	0.0181432	1	1	KCY2_ARATH	KAD4_ARATH	KAD2_ARATH	A0A1P8B9K9_ARATH	F4KAP2_ARATH
cellular_component	GO:0015630	microtubule cytoskeleton	5	13	0.384615	1	1.45764e-21	1	0	KTN82_ARATH	KTN83_ARATH	FH14_ARATH	KTN84_ARATH	KTN81_ARATH
biological_process	GO:0043622	cortical microtubule organization	5	44	0.113636	0.58688	0.599134	1	1	ICR5_ARATH	KN5A_ARATH	GACP4_ARATH	CLASP_ARATH	Q9C6N3_ARATH
molecular_function	GO:0050897	cobalt ion binding	5	49	0.102041	0.474395	0.699869	1	1	MAOP4_ARATH	NDUAC_ARATH	Q9FLH2_ARATH	F4IWV2_ARATH	F4JPA3_ARATH
biological_process	GO:0010286	heat acclimation	5	51	0.0980392	0.575205	0.583079	1	1	HIT4_ARATH	RAP23_ARATH	VP53A_ARATH	XRN4_ARATH	Q9S781_ARATH
cellular_component	GO:0009707	chloroplast outer membrane	5	58	0.0862069	0.355048	0.783183	1	1	PTM_ARATH	TC120_ARATH	TOC90_ARATH	OEP80_ARATH	Q9SX62_ARATH
biological_process	GO:0048511	rhythmic process	5	27	0.185185	0.886874	0.163002	1	1	TIC_ARATH	APRR3_ARATH	SKIP_ARATH	PARG1_ARATH	F4JXG7_ARATH
biological_process	GO:0010027	thylakoid membrane organization	5	49	0.102041	0.479904	0.695198	1	1	SCY2_ARATH	ALB4_ARATH	AB7I_ARATH	Q9C7J5_ARATH	A8MQH6_ARATH
biological_process	GO:0080001	mucilage extrusion from seed coat	5	13	0.384615	0.997876	0.0126037	1	1	SBT17_ARATH	LUH_ARATH	SEP3_ARATH	LEUNG_ARATH	F4JUD2_ARATH
biological_process	GO:0071586	CAAX-box protein processing	5	23	0.217391	0.955109	0.123787	1	1	F4IS89_ARATH	Q94K61_ARATH	F4IS90_ARATH	A0A1P8B118_ARATH	A0A1P8B127_ARATH
biological_process	GO:0010089	xylem development	5	40	0.125	0.63045	0.540625	1	1	IQD14_ARATH	NAC5_ARATH	MYB61_ARATH	E70A1_ARATH	ATHB8_ARATH
biological_process	GO:0016104	triterpenoid biosynthetic process	5	27	0.185185	0.898295	0.225328	1	1	PEN6_ARATH	PEN7_ARATH	LAS1_ARATH	HMDH2_ARATH	A0A1I9LTE4_ARATH
biological_process	GO:0098542	defense response to other organism	5	59	0.0847458	0.114473	0.902651	1	1	M2K1_ARATH	M2K2_ARATH	PRB1_ARATH	TGA5_ARATH	ATL6_ARATH
biological_process	GO:0032502	developmental process	5	60	0.0833333	0.999987	1.65672e-05	1	0.018	PEK12_ARATH	RUS1_ARATH	SNX2B_ARATH	B3H7F6_ARATH	F4KGM7_ARATH
biological_process	GO:0051726	regulation of cell cycle	5	42	0.119048	0.999437	0.00101289	1	0.706	RHF1A_ARATH	RHF2A_ARATH	DPB_ARATH	ALY2_ARATH	ALY1_ARATH
biological_process	GO:0080142	regulation of salicylic acid biosynthetic process	5	14	0.357143	0.99665	0.0177445	1	1	CB60B_ARATH	CB60C_ARATH	CB60D_ARATH	SARD1_ARATH	BIK1_ARATH
biological_process	GO:2000033	regulation of seed dormancy process	5	13	0.384615	0.992734	0.0317506	1	1	PDF2_ARATH	GAI_ARATH	RGA_ARATH	MYB96_ARATH	DOG1_ARATH
cellular_component	GO:0005788	endoplasmic reticulum lumen	5	47	0.106383	0.572336	0.61229	1	1	PDI11_ARATH	PDI12_ARATH	OS9_ARATH	DNJ63_ARATH	F4HZN9_ARATH
biological_process	GO:0048868	pollen tube development	5	38	0.131579	0.17204	0.878783	1	1	FUM1_ARATH	MGP4_ARATH	Q9M9L9_ARATH	F4JXF0_ARATH	F4HTA1_ARATH
biological_process	GO:0009630	gravitropism	5	54	0.0925926	0.338804	0.765927	1	1	PHYA_ARATH	PHYB_ARATH	CMKMT_ARATH	SHGR6_ARATH	ARFG_ARATH
molecular_function	GO:1990841	promoter-specific chromatin binding	5	15	0.333333	0.994824	0.0246267	1	1	PHYB_ARATH	PIF5_ARATH	PIF4_ARATH	RGA_ARATH	MYB57_ARATH
molecular_function	GO:0009881	photoreceptor activity	5	29	0.172414	0.885504	0.220265	1	1	PHYC_ARATH	PHYD_ARATH	PHYE_ARATH	A0A1P8AVD9_ARATH	A0A178VXX1_ARATH
biological_process	GO:0009556	microsporogenesis	5	26	0.192308	0.924196	0.181953	1	1	RUK_ARATH	FH14_ARATH	LBD27_ARATH	CALS5_ARATH	F4HU48_ARATH
cellular_component	GO:0071013	catalytic step 2 spliceosome	5	54	0.0925926	0.578411	0.579442	1	1	PRP8A_ARATH	PRP8B_ARATH	DEAH5_ARATH	Q9LK52_ARATH	Q9ZVX7_ARATH
molecular_function	GO:0031491	nucleosome binding	5	14	0.357143	0.977896	0.0658553	1	1	ISW2_ARATH	SSRP1_ARATH	CHR17_ARATH	F4JY25_ARATH	F4JAV9_ARATH
biological_process	GO:0006283	transcription-coupled nucleotide-excision repair	5	8	0.625	0.999942	0.000908057	1	0.687	CHR8_ARATH	ACSA1_ARATH	F4HQX6_ARATH	F4HUT3_ARATH	A0A1P8ANN6_ARATH
biological_process	GO:0010193	response to ozone	5	31	0.16129	0.816747	0.343383	1	1	LOX4_ARATH	CRK2_ARATH	WRK30_ARATH	WRK53_ARATH	AB40G_ARATH
molecular_function	GO:0017108	5'-flap endonuclease activity	5	16	0.3125	0.992534	0.0324273	1	1	JHS1_ARATH	ERCC1_ARATH	Q9FHS4_ARATH	A0A1P8ASU0_ARATH	F4HXR5_ARATH
biological_process	GO:0031123	RNA 3'-end processing	5	10	0.5	0.95067	0.0849004	1	1	CTF64_ARATH	CTF77_ARATH	HESO1_ARATH	Q7Y216_ARATH	F4J6R3_ARATH
biological_process	GO:0010026	trichome differentiation	5	21	0.238095	0.997797	0.00500028	1	0.997	GIS3_ARATH	GIS_ARATH	FAS1_ARATH	STI_ARATH	ZFP6_ARATH
cellular_component	GO:0000137	Golgi cis cisterna	5	41	0.121951	0.696208	0.486997	1	1	OFT15_ARATH	MNS2_ARATH	DEX1_ARATH	Q9SSP6_ARATH	A8MQN4_ARATH
biological_process	GO:1900056	negative regulation of leaf senescence	5	15	0.333333	0.994965	0.0240993	1	1	FHY3_ARATH	FAR1_ARATH	TCP20_ARATH	WRK70_ARATH	B3GTJ_ARATH
biological_process	GO:0009625	response to insect	5	34	0.147059	0.797987	0.367757	1	1	WRK70_ARATH	MYB29_ARATH	MYB76_ARATH	DOF11_ARATH	Q2V4Q1_ARATH
biological_process	GO:0009911	positive regulation of flower development	5	36	0.138889	0.758568	0.416454	1	1	PCFS4_ARATH	FPA_ARATH	MED25_ARATH	FD_ARATH	EDM2_ARATH
biological_process	GO:0048467	gynoecium development	5	18	0.277778	0.899058	0.165017	1	1	PEP_ARATH	SLK1_ARATH	SEUSS_ARATH	TCP15_ARATH	MYO5_ARATH
biological_process	GO:0042254	ribosome biogenesis	5	47	0.106383	0.00871797	0.994442	0.973	1	Q94AF6_ARATH	Q9LR70_ARATH	Q9SU26_ARATH	F4JPJ1_ARATH	A0A1P8ATX3_ARATH
biological_process	GO:0044030	regulation of DNA methylation	5	18	0.277778	0.9819	0.0629649	1	1	DDM1_ARATH	SAC3B_ARATH	IDM1_ARATH	AGDP1_ARATH	EDM2_ARATH
biological_process	GO:0070918	primary sncRNA processing	5	9	0.555556	0.999991	3.14224e-05	1	0.04	A0A1I9LMD3_ARATH	F4J0I5_ARATH	A0A1I9LR45_ARATH	A0A1I9LMD4_ARATH	A0A1I9LMD2_ARATH
biological_process	GO:0010162	seed dormancy process	5	23	0.217391	0.972264	0.0619831	1	1	NCED9_ARATH	BRE1A_ARATH	BRE1B_ARATH	ICE1_ARATH	DOG1_ARATH
biological_process	GO:0010267	primary ta-siRNA processing	5	15	0.333333	0.994965	0.0240993	1	1	SDE5_ARATH	DRB1_ARATH	DCL2_ARATH	DCL3_ARATH	AGO7_ARATH
cellular_component	GO:0090404	pollen tube tip	5	21	0.238095	0.976419	0.0763036	1	1	KIP_ARATH	PRK6_ARATH	AB28G_ARATH	F4KGM7_ARATH	F4HTA1_ARATH
biological_process	GO:0009863	salicylic acid mediated signaling pathway	5	29	0.172414	0.665815	0.465121	1	1	RENT1_ARATH	GAI_ARATH	RENT3_ARATH	TGA5_ARATH	RGA_ARATH
biological_process	GO:2000070	regulation of response to water deprivation	5	17	0.294118	0.989679	0.0285732	1	1	CMKMT_ARATH	RZF1_ARATH	TATB_ARATH	WRK70_ARATH	MYB29_ARATH
molecular_function	GO:0008483	transaminase activity	5	65	0.0769231	0.295623	0.800865	1	1	MAIL2_ARATH	1A15_ARATH	Q9LUL9_ARATH	F4JXK3_ARATH	F4I6L3_ARATH
biological_process	GO:0006906	vesicle fusion	5	41	0.121951	0.885745	0.204523	1	1	SYP21_ARATH	SYP22_ARATH	SYP31_ARATH	SYP32_ARATH	GOS12_ARATH
biological_process	GO:0009959	negative gravitropism	5	29	0.172414	0.883816	0.248066	1	1	SYP22_ARATH	SHGR6_ARATH	SHGR2_ARATH	Q9LZZ5_ARATH	Q9MAG4_ARATH
biological_process	GO:1900150	regulation of defense response to fungus	5	46	0.108696	0.670299	0.499215	1	1	M3K3A_ARATH	SYD_ARATH	WRKY4_ARATH	MD20A_ARATH	Q9M155_ARATH
biological_process	GO:0006612	protein targeting to membrane	5	36	0.138889	0.696063	0.432327	1	1	ZDH17_ARATH	NACA1_ARATH	NACA2_ARATH	NACA3_ARATH	NACA5_ARATH
biological_process	GO:0006401	RNA catabolic process	5	20	0.25	0.999999	3.0164e-06	1	0.005	SKI2_ARATH	F4I3Z6_ARATH	A0A1I9LMK0_ARATH	A0A1P8AR19_ARATH	A0A1I9LMJ9_ARATH
biological_process	GO:0048443	stamen development	5	23	0.217391	0.799246	0.293202	1	1	NUA_ARATH	PV42B_ARATH	MYB57_ARATH	AB1B_ARATH	ATXR3_ARATH
molecular_function	GO:0050135	NAD(P)+ nucleosidase activity	5	31	0.16129	0.849218	0.299075	1	1	RPP4_ARATH	CHL1_ARATH	RLM1B_ARATH	RLM3_ARATH	VICTR_ARATH
molecular_function	GO:0061809	NAD+ nucleotidase, cyclic ADP-ribose generating	5	31	0.16129	0.849218	0.299075	1	1	RPP4_ARATH	CHL1_ARATH	RLM1B_ARATH	RLM3_ARATH	VICTR_ARATH
molecular_function	GO:0005381	iron ion transmembrane transporter activity	5	25	0.2	0.934145	0.164197	1	1	MEB1_ARATH	S40A2_ARATH	IRT3_ARATH	A0A1P8BGU8_ARATH	A0A1P8BGV1_ARATH
biological_process	GO:0031122	cytoplasmic microtubule organization	5	10	0.5	0.914289	0.162427	1	1	GACP2_ARATH	GACP3_ARATH	GACP4_ARATH	TBG2_ARATH	TBG1_ARATH
biological_process	GO:0010104	regulation of ethylene-activated signaling pathway	5	10	0.5	0.992533	0.0233921	1	1	MED16_ARATH	SYD_ARATH	WRK70_ARATH	TA12B_ARATH	F4JUW0_ARATH
biological_process	GO:0000723	telomere maintenance	5	25	0.2	0.888183	0.216263	1	1	RTEL1_ARATH	PLET1_ARATH	MRE11_ARATH	PLET2_ARATH	Q709F6_ARATH
biological_process	GO:0009688	abscisic acid biosynthetic process	5	16	0.3125	0.987351	0.0388439	1	1	NCED9_ARATH	ALDO4_ARATH	ALDO1_ARATH	ALDO2_ARATH	ALDO3_ARATH
biological_process	GO:0000290	deadenylation-dependent decapping of nuclear-transcribed mRNA	5	8	0.625	0.999942	0.000908057	1	0.687	PATH1_ARATH	DCP1_ARATH	PATH2_ARATH	PAT1H_ARATH	A0A1P8B4Z4_ARATH
biological_process	GO:0033962	P-body assembly	5	16	0.3125	0.992734	0.0317506	1	1	PATH1_ARATH	DCP5L_ARATH	PATH2_ARATH	PAT1H_ARATH	O65707_ARATH
biological_process	GO:0019827	stem cell population maintenance	5	10	0.5	0.946839	0.0937702	1	1	PATH1_ARATH	PLET1_ARATH	NOV_ARATH	PLET2_ARATH	TPST_ARATH
biological_process	GO:0007033	vacuole organization	5	27	0.185185	0.999981	6.08779e-05	1	0.081	VPS39_ARATH	FAB1A_ARATH	FAB1B_ARATH	AMSH3_ARATH	BRO1_ARATH
biological_process	GO:0010208	pollen wall assembly	5	17	0.294118	0.820601	0.310013	1	1	FAX1_ARATH	GFAT1_ARATH	DEX1_ARATH	AB31G_ARATH	CALS5_ARATH
molecular_function	GO:0003691	double-stranded telomeric DNA binding	5	13	0.384615	0.997814	0.0128943	1	1	TRP1_ARATH	TRB4_ARATH	A0A178WHA3_ARATH	A0A178WID5_ARATH	A0A1P8AQ25_ARATH
molecular_function	GO:0060090	molecular adaptor activity	5	9	0.555556	0.648752	0.458616	1	1	ATG11_ARATH	F4JG03_ARATH	F4HVV6_ARATH	F4IVJ8_ARATH	A0A1P8AX98_ARATH
biological_process	GO:0080111	DNA demethylation	5	11	0.454545	0.992106	0.0295363	1	1	DNLI1_ARATH	ROS1_ARATH	APE2_ARATH	F4IXH3_ARATH	F4IBR2_ARATH
biological_process	GO:0006893	Golgi to plasma membrane transport	5	17	0.294118	0.986498	0.0448906	1	1	SEC3A_ARATH	SEC3B_ARATH	EX84A_ARATH	SECAB_ARATH	SECAA_ARATH
molecular_function	GO:0010181	FMN binding	5	46	0.108696	0.538043	0.644445	1	1	PPOX1_ARATH	FQRL1_ARATH	FQRL2_ARATH	A0A1P8B767_ARATH	A0A1P8B765_ARATH
molecular_function	GO:0008757	S-adenosylmethionine-dependent methyltransferase activity	5	68	0.0735294	0.395694	0.677348	1	1	B3H6T0_ARATH	Q9CAQ3_ARATH	Q9CAQ4_ARATH	Q9M1Y7_ARATH	F4IT21_ARATH
biological_process	GO:0090110	COPII-coated vesicle cargo loading	5	12	0.416667	0.998731	0.00857292	1	1	SC24A_ARATH	SC24B_ARATH	SC31B_ARATH	Q9SIJ7_ARATH	F4JUM1_ARATH
biological_process	GO:0009561	megagametogenesis	5	28	0.178571	0.493581	0.650019	1	1	ISW2_ARATH	NRPC2_ARATH	RHF1A_ARATH	RH36_ARATH	RHF2A_ARATH
biological_process	GO:0007059	chromosome segregation	5	32	0.15625	0.999922	0.000169354	1	0.207	SPC25_ARATH	MPS1_ARATH	SMC1_ARATH	TSL_ARATH	TOP3A_ARATH
biological_process	GO:0008361	regulation of cell size	5	15	0.333333	0.973473	0.075804	1	1	SC24A_ARATH	GTL1_ARATH	FZR1_ARATH	TCP20_ARATH	AB1B_ARATH
molecular_function	GO:0018024	histone-lysine N-methyltransferase activity	5	48	0.104167	0.711606	0.430937	1	1	SUVR5_ARATH	ATX5_ARATH	A0A1P8AZG6_ARATH	F4IMM1_ARATH	A0A1P8AR04_ARATH
biological_process	GO:0090332	stomatal closure	5	18	0.277778	0.837573	0.278097	1	1	FAB1B_ARATH	FAB1C_ARATH	GSXL7_ARATH	PARG1_ARATH	AB40G_ARATH
molecular_function	GO:0016298	lipase activity	5	72	0.0694444	0.0976704	0.94059	1	1	GDL53_ARATH	GLIP5_ARATH	GLIP7_ARATH	APG_ARATH	F4HSP7_ARATH
biological_process	GO:0010629	negative regulation of gene expression	5	23	0.217391	1	3.41113e-14	1	0	HHO5_ARATH	GAI_ARATH	BZP30_ARATH	MSI5_ARATH	B3H7M2_ARATH
biological_process	GO:2000032	regulation of secondary shoot formation	5	16	0.3125	0.992734	0.0317506	1	1	TCP24_ARATH	SCL29_ARATH	TCP3_ARATH	TCP10_ARATH	TCP18_ARATH
cellular_component	GO:0031011	Ino80 complex	5	25	0.2	0.947536	0.13833	1	1	INO80_ARATH	F4K5E0_ARATH	F4J277_ARATH	F4K5E2_ARATH	A0A1I9LT22_ARATH
biological_process	GO:0000422	autophagy of mitochondrion	5	16	0.3125	0.997038	0.0137174	1	1	ATG9_ARATH	ATG11_ARATH	ATG7_ARATH	AT18D_ARATH	AT18A_ARATH
molecular_function	GO:0046527	glucosyltransferase activity	5	17	0.294118	0.19773	0.85734	1	1	CALS8_ARATH	CALS3_ARATH	CALS7_ARATH	CALS5_ARATH	Q8GW77_ARATH
biological_process	GO:0090630	activation of GTPase activity	5	25	0.2	0.935568	0.161539	1	1	Q9LVD7_ARATH	Q9SZR5_ARATH	B3H765_ARATH	A1L4V1_ARATH	F4JX92_ARATH
cellular_component	GO:0005854	nascent polypeptide-associated complex	5	9	0.555556	0.999882	0.00146283	1	0.333	NACA1_ARATH	NACA2_ARATH	NACA3_ARATH	NACA5_ARATH	A0A1I9LR04_ARATH
biological_process	GO:0030705	cytoskeleton-dependent intracellular transport	5	10	0.5	0.999955	0.000216614	1	0.28	KINUA_ARATH	KINUB_ARATH	KINUC_ARATH	KN14T_ARATH	F4K4W1_ARATH
biological_process	GO:0032012	regulation of ARF protein signal transduction	5	10	0.5	0.999645	0.00333622	1	0.981	BIG2_ARATH	BIG4_ARATH	GNOM_ARATH	BIG5_ARATH	A0A1P8B4J7_ARATH
biological_process	GO:0031124	mRNA 3'-end processing	5	7	0.714286	0.999856	0.000561116	1	0.468	CPSF_ARATH	Q8VYM7_ARATH	Q9FJP7_ARATH	Q8GUK8_ARATH	A0A1P8AMZ0_ARATH
biological_process	GO:0048024	regulation of mRNA splicing, via spliceosome	5	9	0.555556	0.963298	0.106636	1	1	CPSF_ARATH	SF1_ARATH	QKIL1_ARATH	QKIL2_ARATH	Q0WVW4_ARATH
cellular_component	GO:0000123	histone acetyltransferase complex	5	16	0.3125	0.999694	0.00087572	1	0.189	HAC1_ARATH	HAC4_ARATH	HAC5_ARATH	HAC12_ARATH	F4IBR2_ARATH
biological_process	GO:0006891	intra-Golgi vesicle-mediated transport	5	32	0.15625	0.891841	0.221431	1	1	COPB2_ARATH	COPA2_ARATH	COPA1_ARATH	COPB1_ARATH	F4KCR8_ARATH
cellular_component	GO:0030126	COPI vesicle coat	5	19	0.263158	0.985694	0.0524505	1	1	COPB2_ARATH	COPA2_ARATH	COPA1_ARATH	COPB1_ARATH	A0A1P8B4C2_ARATH
biological_process	GO:0008285	negative regulation of cell population proliferation	5	42	0.119048	0.630682	0.556279	1	1	DA1_ARATH	TCP24_ARATH	MYB36_ARATH	MYB65_ARATH	ABAP1_ARATH
biological_process	GO:0016584	nucleosome positioning	5	14	0.357143	0.99665	0.0177445	1	1	ISW2_ARATH	CHR17_ARATH	F4JY25_ARATH	Q9LSK7_ARATH	F4JAV9_ARATH
cellular_component	GO:0043229	intracellular organelle	5	31	0.16129	1	1.86297e-28	1	0	Q9FFG4_ARATH	Q9LMX6_ARATH	Q9ZPR2_ARATH	Q8LPK7_ARATH	F4IT98_ARATH
molecular_function	GO:0061608	nuclear import signal receptor activity	5	21	0.238095	0.969743	0.0924241	1	1	IMPA4_ARATH	IMPA7_ARATH	IMPA6_ARATH	TNPO1_ARATH	F4HXL3_ARATH
biological_process	GO:0060968	obsolete regulation of gene silencing	5	8	0.625	0.999666	0.00118111	1	0.735	CTF64_ARATH	CTF77_ARATH	NUA_ARATH	SAC3B_ARATH	UBN1_ARATH
biological_process	GO:0030244	cellulose biosynthetic process	5	55	0.0909091	0.912409	0.149124	1	1	CESA8_ARATH	CSLD1_ARATH	PSL5_ARATH	CESA1_ARATH	GLYT7_ARATH
biological_process	GO:0034063	stress granule assembly	5	16	0.3125	0.992734	0.0317506	1	1	DCP5L_ARATH	UBP1C_ARATH	RB47B_ARATH	CID4_ARATH	O65707_ARATH
molecular_function	GO:0005385	zinc ion transmembrane transporter activity	5	28	0.178571	0.896218	0.2287	1	1	HMA2_ARATH	ZIP11_ARATH	ZIP4_ARATH	IRT3_ARATH	A0A1P8ARJ0_ARATH
cellular_component	GO:0030131	clathrin adaptor complex	5	17	0.294118	0.927462	0.175581	1	1	APBLB_ARATH	APBLA_ARATH	APBLC_ARATH	F4JXV9_ARATH	F4JNZ8_ARATH
cellular_component	GO:0030665	clathrin-coated vesicle membrane	5	10	0.5	0.987526	0.0354337	1	1	APBLB_ARATH	APBLA_ARATH	VSR1_ARATH	VSR6_ARATH	APBLC_ARATH
biological_process	GO:0009682	induced systemic resistance	5	18	0.277778	0.93656	0.147997	1	1	NU205_ARATH	WRK11_ARATH	WRK70_ARATH	ILA_ARATH	MYB29_ARATH
molecular_function	GO:0003964	RNA-directed DNA polymerase activity	5	57	0.0877193	0.290619	0.839884	1	1	POLR2_ARATH	POLR1_ARATH	O64712_ARATH	F4J6J5_ARATH	A0A1I9LSY4_ARATH
molecular_function	GO:0000146	microfilament motor activity	5	18	0.277778	0.985923	0.052191	1	1	MYO10_ARATH	MYO12_ARATH	MYO13_ARATH	MYO5_ARATH	MYO7_ARATH
biological_process	GO:0030050	vesicle transport along actin filament	5	18	0.277778	0.986283	0.0511585	1	1	MYO10_ARATH	MYO12_ARATH	MYO13_ARATH	MYO5_ARATH	MYO7_ARATH
molecular_function	GO:0004693	cyclin-dependent protein serine/threonine kinase activity	5	33	0.151515	0.813488	0.347729	1	1	CDKE1_ARATH	CDKG1_ARATH	Q9FKV9_ARATH	Q9LNN0_ARATH	F4I854_ARATH
molecular_function	GO:0015562	efflux transmembrane transporter activity	5	10	0.5	0.997814	0.0128943	1	1	AB14G_ARATH	AB40G_ARATH	AB11G_ARATH	AB30G_ARATH	AB31G_ARATH
biological_process	GO:0045292	mRNA cis splicing, via spliceosome	5	31	0.16129	0.878575	0.241432	1	1	PR40A_ARATH	PR40B_ARATH	ICLN_ARATH	Q9LK52_ARATH	A0A1I9LM87_ARATH
cellular_component	GO:0000930	gamma-tubulin complex	5	9	0.555556	0.999732	0.00265772	1	0.518	GACP2_ARATH	GACP3_ARATH	GACP4_ARATH	TBG2_ARATH	TBG1_ARATH
molecular_function	GO:0043015	gamma-tubulin binding	5	16	0.3125	0.992534	0.0324273	1	1	GACP2_ARATH	GACP3_ARATH	GACP4_ARATH	A0A1I9LLT7_ARATH	A0A1I9LLT8_ARATH
molecular_function	GO:0005384	manganese ion transmembrane transporter activity	5	28	0.178571	0.881506	0.25166	1	1	PAM71_ARATH	MEB1_ARATH	GDT14_ARATH	A0A1P8B7C6_ARATH	A0A1P8B7E1_ARATH
biological_process	GO:0033314	mitotic DNA replication checkpoint signaling	5	11	0.454545	0.999296	0.00552957	1	0.999	ARS1_ARATH	Q709F6_ARATH	Q9CAP6_ARATH	A0A1P8AWF3_ARATH	F4KHP4_ARATH
cellular_component	GO:0016593	Cdc73/Paf1 complex	5	9	0.555556	0.999882	0.00146283	1	0.333	VIP6_ARATH	VIP5_ARATH	VIP4_ARATH	C3H19_ARATH	F4K204_ARATH
cellular_component	GO:0005880	nuclear microtubule	5	19	0.263158	0.985694	0.0524505	1	1	TPX2_ARATH	QWRF3_ARATH	QWRF6_ARATH	EDE1_ARATH	F4K9U0_ARATH
biological_process	GO:0071705	nitrogen compound transport	5	12	0.416667	0.995301	0.00597769	1	1	NRG2_ARATH	UPS5_ARATH	F4IT87_ARATH	B3H4C7_ARATH	F4IT88_ARATH
biological_process	GO:0010498	proteasomal protein catabolic process	5	28	0.178571	0.96595	0.0475138	1	1	PSB7B_ARATH	PSB7A_ARATH	PSA6A_ARATH	PSA6B_ARATH	RHF1A_ARATH
cellular_component	GO:0016035	zeta DNA polymerase complex	5	6	0.833333	0.999998	9.30931e-05	1	0.019	REV3_ARATH	A0A1P8AMQ2_ARATH	F4HTM5_ARATH	A0A1P8AMM8_ARATH	A0A1P8AMN7_ARATH
cellular_component	GO:0030906	retromer, cargo-selective complex	5	7	0.714286	0.999988	0.000295715	1	0.066	VP35B_ARATH	A0A1P8ATR6_ARATH	A0A1P8AQF4_ARATH	A0A1P8ATS8_ARATH	F4I6L0_ARATH
biological_process	GO:0051014	actin filament severing	5	7	0.714286	0.999984	0.000377055	1	0.392	VILI2_ARATH	VILI3_ARATH	VILI1_ARATH	A0A1P8AZB7_ARATH	Q2V445_ARATH
cellular_component	GO:0016602	CCAAT-binding factor complex	5	32	0.15625	0.860982	0.281479	1	1	NFYA2_ARATH	NFYA5_ARATH	NFYA6_ARATH	NFYB8_ARATH	NFYBA_ARATH
biological_process	GO:0010497	plasmodesmata-mediated intercellular transport	4	20	0.2	0.923831	0.20059	1	1	PDLP1_ARATH	PDLP2_ARATH	PDLP3_ARATH	GL21_ARATH
biological_process	GO:0006096	glycolytic process	4	83	0.0481928	0.0251735	0.991692	1	1	GPMA2_ARATH	PKP1_ARATH	Q9SJQ0_ARATH	Q94KE3_ARATH
molecular_function	GO:0004601	peroxidase activity	4	148	0.027027	4.0337e-06	0.999999	0	1	PER61_ARATH	RBOHF_ARATH	RBOHI_ARATH	PER12_ARATH
biological_process	GO:0010043	response to zinc ion	4	41	0.097561	0.465978	0.72386	1	1	PDI11_ARATH	PSA6A_ARATH	MYB72_ARATH	F4JTK8_ARATH
cellular_component	GO:0035098	ESC/E(Z) complex	4	11	0.363636	0.995572	0.02664	1	1	PDP3_ARATH	PDP5_ARATH	MSI5_ARATH	MSI4_ARATH
biological_process	GO:0098532	histone H3-K27 trimethylation	4	8	0.5	0.998731	0.00857292	1	1	PDP3_ARATH	PDP5_ARATH	MSI5_ARATH	MSI4_ARATH
cellular_component	GO:0090406	pollen tube	4	67	0.0597015	0.506872	0.629795	1	1	MIK2_ARATH	RH36_ARATH	MY120_ARATH	MYB97_ARATH
molecular_function	GO:0016791	phosphatase activity	4	98	0.0408163	0.0571741	0.958324	1	1	GPAT3_ARATH	A0A1P8AX44_ARATH	Q8VY28_ARATH	A0A1P8AZ51_ARATH
biological_process	GO:0018342	protein prenylation	4	11	0.363636	0.959242	0.129568	1	1	O80601_ARATH	A0A1P8AV10_ARATH	A0A1P8AUX8_ARATH	A0A1P8AV19_ARATH
cellular_component	GO:0071011	precatalytic spliceosome	4	35	0.114286	0.650029	0.557343	1	1	SMU1_ARATH	Q8LCC7_ARATH	F4JC80_ARATH	F4JRD3_ARATH
molecular_function	GO:0042300	beta-amyrin synthase activity	4	27	0.148148	0.793606	0.395746	1	1	PEN6_ARATH	PEN7_ARATH	LAS1_ARATH	A0A1I9LTE4_ARATH
molecular_function	GO:0000250	lanosterol synthase activity	4	27	0.148148	0.793606	0.395746	1	1	PEN6_ARATH	PEN7_ARATH	LAS1_ARATH	A0A1I9LTE4_ARATH
biological_process	GO:0048527	lateral root development	4	54	0.0740741	0.143726	0.911682	1	1	ARFS_ARATH	ARFG_ARATH	NAC22_ARATH	MYB88_ARATH
cellular_component	GO:0000407	phagophore assembly site	4	9	0.444444	0.999947	0.000333664	1	0.069	ATG9_ARATH	ATG7_ARATH	BECN1_ARATH	AT13A_ARATH
cellular_component	GO:0005764	lysosome	4	37	0.108108	0.252058	0.875096	1	1	FUCO1_ARATH	SAG12_ARATH	RD19C_ARATH	ASY1_ARATH
biological_process	GO:0019985	translesion synthesis	4	7	0.571429	0.999995	5.49509e-05	1	0.072	A0A1P8AMQ2_ARATH	F4HTM5_ARATH	A0A1P8AMM8_ARATH	A0A1P8AMN7_ARATH
biological_process	GO:0042276	error-prone translesion synthesis	4	9	0.444444	0.998154	0.0145777	1	1	POLK_ARATH	POLH_ARATH	REV3_ARATH	DPB2_ARATH
biological_process	GO:0012501	programmed cell death	4	19	0.210526	0.915457	0.124978	1	1	SMG7_ARATH	EXA1_ARATH	CRK9_ARATH	F4I354_ARATH
biological_process	GO:0010449	root meristem growth	4	13	0.307692	0.897096	0.194698	1	1	PLET1_ARATH	M3K1_ARATH	KTI12_ARATH	PLET2_ARATH
biological_process	GO:2000280	regulation of root development	4	60	0.0666667	0.148546	0.924531	1	1	CMKMT_ARATH	GSO1_ARATH	DOF11_ARATH	GL21_ARATH
biological_process	GO:0009741	response to brassinosteroid	4	33	0.121212	0.0176021	0.992865	1	1	PME41_ARATH	THE1_ARATH	RER5_ARATH	ELF6_ARATH
biological_process	GO:0009644	response to high light intensity	4	46	0.0869565	0.250913	0.866488	1	1	PDI12_ARATH	LOX3_ARATH	MYB29_ARATH	MYB30_ARATH
biological_process	GO:0010161	red light signaling pathway	4	10	0.4	0.996664	0.0220719	1	1	PHYA_ARATH	PHYB_ARATH	PIF4_ARATH	DOF25_ARATH
biological_process	GO:0010374	stomatal complex development	4	22	0.181818	0.975487	0.050432	1	1	PHYB_ARATH	MYC2_ARATH	MYC3_ARATH	FAMA_ARATH
biological_process	GO:0051017	actin filament bundle assembly	4	24	0.166667	0.857882	0.307905	1	1	FIMB5_ARATH	FH14_ARATH	VILI2_ARATH	VILI3_ARATH
biological_process	GO:0016024	CDP-diacylglycerol biosynthetic process	4	25	0.16	0.838461	0.335784	1	1	GPAT3_ARATH	CDS2_ARATH	F4JL60_ARATH	F4JL62_ARATH
biological_process	GO:0010154	fruit development	4	32	0.125	0.935692	0.0803767	1	1	PAO_ARATH	MLH1_ARATH	MYO5_ARATH	F4I642_ARATH
molecular_function	GO:0005345	purine nucleobase transmembrane transporter activity	4	22	0.181818	0.934145	0.164197	1	1	PUP7_ARATH	PUP8_ARATH	PUP12_ARATH	A0A2H1ZE88_ARATH
molecular_function	GO:0019843	rRNA binding	4	98	0.0408163	0.018738	0.991585	0.976	1	NOF1_ARATH	RK4_ARATH	RHON1_ARATH	A0A1P8AV66_ARATH
biological_process	GO:0032968	positive regulation of transcription elongation from RNA polymerase II promoter	4	26	0.153846	0.818047	0.363753	1	1	VIP4_ARATH	Q9FKV9_ARATH	Q9LNN0_ARATH	F4I854_ARATH
cellular_component	GO:0010494	cytoplasmic stress granule	4	26	0.153846	0.843501	0.327861	1	1	XRN4_ARATH	RB47B_ARATH	R47BP_ARATH	CID4_ARATH
biological_process	GO:0006402	mRNA catabolic process	4	31	0.129032	0.999966	8.17181e-05	1	0.105	VCR_ARATH	VCS_ARATH	AK10B_ARATH	XRN4_ARATH
molecular_function	GO:0003755	peptidyl-prolyl cis-trans isomerase activity	4	82	0.0487805	0.0285684	0.990412	0.993	1	CYP63_ARATH	FKB42_ARATH	CYP59_ARATH	A0A1P8AQN8_ARATH
biological_process	GO:0016925	protein sumoylation	4	21	0.190476	0.963298	0.106636	1	1	PIAL1_ARATH	SAE2_ARATH	PIAL2_ARATH	F4IHI1_ARATH
cellular_component	GO:0032991	protein-containing complex	4	36	0.111111	1	2.40453e-09	1	0	CSN4_ARATH	RH53_ARATH	EDM2_ARATH	F4JV27_ARATH
molecular_function	GO:0000993	RNA polymerase II complex binding	4	14	0.285714	0.999461	0.00305838	1	0.882	PCFS4_ARATH	VIP6_ARATH	Q9FJP7_ARATH	Q8GUK8_ARATH
cellular_component	GO:0031977	thylakoid lumen	4	54	0.0740741	0.0794629	0.968835	1	1	ATPA_ARATH	TL15A_ARATH	TL1Y_ARATH	FTSH1_ARATH
biological_process	GO:0000289	nuclear-transcribed mRNA poly(A) tail shortening	4	10	0.4	0.987396	0.0565104	1	1	PABP5_ARATH	VIP2_ARATH	A8MR45_ARATH	A0A1P8B9R0_ARATH
biological_process	GO:0006004	fucose metabolic process	4	48	0.0833333	0.271147	0.863424	1	1	OFT15_ARATH	FUCO1_ARATH	OFUT8_ARATH	B3H6X4_ARATH
biological_process	GO:0006349	regulation of gene expression by genomic imprinting	4	13	0.307692	0.987396	0.0565104	1	1	DDM1_ARATH	DME_ARATH	PP273_ARATH	EMF2_ARATH
molecular_function	GO:0008381	mechanosensitive ion channel activity	4	15	0.266667	0.975373	0.0908744	1	1	CSC1_ARATH	PIEZO_ARATH	A0A1P8AYH1_ARATH	A0A1P8AYL8_ARATH
biological_process	GO:0034599	cellular response to oxidative stress	4	54	0.0740741	0.195821	0.890376	1	1	MSRA1_ARATH	MSRA3_ARATH	ATA15_ARATH	AB1K7_ARATH
biological_process	GO:0035196	production of miRNAs involved in gene silencing by miRNA	4	13	0.307692	0.953797	0.116184	1	1	DRB1_ARATH	MED17_ARATH	THOC2_ARATH	MD20A_ARATH
cellular_component	GO:0000419	RNA polymerase V complex	4	22	0.181818	0.909915	0.224532	1	1	NRPE1_ARATH	RPD2B_ARATH	NRPD2_ARATH	DMS3_ARATH
biological_process	GO:0042128	nitrate assimilation	4	40	0.1	0.443721	0.7415	1	1	FUM2_ARATH	NRT26_ARATH	NRT23_ARATH	PTR47_ARATH
biological_process	GO:0080022	primary root development	4	33	0.121212	0.656617	0.551358	1	1	HRS1_ARATH	ZWIP2_ARATH	ZWIP4_ARATH	ZWIP5_ARATH
biological_process	GO:0051085	chaperone cofactor-dependent protein refolding	4	48	0.0833333	0.322669	0.829676	1	1	DNAJ1_ARATH	CPNB1_ARATH	GFA2_ARATH	Q9M2L3_ARATH
biological_process	GO:0006378	mRNA polyadenylation	4	23	0.173913	0.99067	0.0280793	1	1	PCFS4_ARATH	CPSF_ARATH	FPA_ARATH	Q9M033_ARATH
cellular_component	GO:0031966	mitochondrial membrane	4	81	0.0493827	2.9835e-06	0.999999	0	1	SCPDL_ARATH	M140_ARATH	UCRI2_ARATH	F4JVD6_ARATH
biological_process	GO:0033500	carbohydrate homeostasis	4	6	0.666667	0.946798	0.121425	1	1	RBOHF_ARATH	MCAC1_ARATH	SMXL4_ARATH	SMXL5_ARATH
biological_process	GO:0019750	chloroplast localization	4	5	0.8	0.998438	0.00510269	1	0.998	REC1_ARATH	REC2_ARATH	REC3_ARATH	CLU_ARATH
biological_process	GO:0009299	mRNA transcription	4	13	0.307692	0.975901	0.0894413	1	1	PEP_ARATH	LSH2_ARATH	LSH7_ARATH	LSH9_ARATH
molecular_function	GO:0035198	miRNA binding	4	12	0.333333	0.991224	0.0437582	1	1	DRB1_ARATH	AGO10_ARATH	AGO1_ARATH	F4IXI9_ARATH
biological_process	GO:0016554	cytidine to uridine editing	4	27	0.148148	0.796748	0.391666	1	1	RBG3_ARATH	MORF1_ARATH	MORF4_ARATH	A0A1R7T3H8_ARATH
biological_process	GO:0080156	mitochondrial mRNA modification	4	28	0.142857	0.774672	0.41939	1	1	RBG3_ARATH	MORF1_ARATH	PP246_ARATH	MORF4_ARATH
biological_process	GO:0006654	phosphatidic acid biosynthetic process	4	9	0.444444	0.998154	0.0145777	1	1	PLDZ1_ARATH	A0A1I9LQ38_ARATH	A0A1I9LQ42_ARATH	A0A1I9LQ40_ARATH
biological_process	GO:0042546	cell wall biogenesis	4	63	0.0634921	0.693513	0.371683	1	1	GALS1_ARATH	GALS2_ARATH	GALS3_ARATH	XTH26_ARATH
biological_process	GO:0009788	negative regulation of abscisic acid-activated signaling pathway	4	54	0.0740741	0.225854	0.891272	1	1	HRS1_ARATH	CPL3_ARATH	FREE1_ARATH	ZFP6_ARATH
biological_process	GO:0009615	response to virus	4	39	0.102564	0.998594	0.00312212	1	0.971	PAP85_ARATH	WAK1_ARATH	IF4G_ARATH	Q8W4K6_ARATH
biological_process	GO:0080092	regulation of pollen tube growth	4	38	0.105263	0.535506	0.665639	1	1	Y2214_ARATH	MY120_ARATH	MYB97_ARATH	CALS5_ARATH
biological_process	GO:0010082	regulation of root meristem growth	4	37	0.108108	0.559403	0.644466	1	1	MCM2_ARATH	TPST_ARATH	VICTR_ARATH	F4KIH9_ARATH
biological_process	GO:0048354	mucilage biosynthetic process involved in seed coat development	4	14	0.285714	0.982255	0.0720167	1	1	COBL2_ARATH	BGAL6_ARATH	B3GTJ_ARATH	F4KGM7_ARATH
biological_process	GO:1901259	chloroplast rRNA processing	4	21	0.190476	0.909258	0.226436	1	1	CP33_ARATH	CP29A_ARATH	RHON1_ARATH	F4HQH8_ARATH
biological_process	GO:0009938	negative regulation of gibberellic acid mediated signaling pathway	4	13	0.307692	0.987396	0.0565104	1	1	GAI_ARATH	TPR4_ARATH	RGA_ARATH	NAC40_ARATH
biological_process	GO:0051123	RNA polymerase II preinitiation complex assembly	4	11	0.363636	0.982255	0.0720167	1	1	TAF9_ARATH	TAF12_ARATH	TAF1B_ARATH	TA12B_ARATH
biological_process	GO:0043966	histone H3 acetylation	4	11	0.363636	0.992106	0.0295363	1	1	TAF9_ARATH	MSI5_ARATH	MSI4_ARATH	MBD9_ARATH
biological_process	GO:0009926	auxin polar transport	4	43	0.0930233	0.351535	0.759861	1	1	NOV_ARATH	BIG_ARATH	2AAA_ARATH	AB1B_ARATH
biological_process	GO:0006896	Golgi to vacuole transport	4	23	0.173913	0.857882	0.307905	1	1	SYP21_ARATH	VSR1_ARATH	VSR6_ARATH	VPS54_ARATH
biological_process	GO:0048278	vesicle docking	4	27	0.148148	0.465978	0.72386	1	1	SYP21_ARATH	SYP22_ARATH	SYP31_ARATH	SYP32_ARATH
biological_process	GO:0009660	amyloplast organization	4	5	0.8	0.999978	0.000853309	1	0.647	SYP22_ARATH	TI236_ARATH	SHGR6_ARATH	SHGR2_ARATH
biological_process	GO:0010109	regulation of photosynthesis	4	10	0.4	0.789488	0.349566	1	1	KEA3_ARATH	FUM2_ARATH	KEA1_ARATH	F4JHE9_ARATH
molecular_function	GO:0017025	TBP-class protein binding	4	23	0.173913	0.874049	0.283676	1	1	PBRP2_ARATH	TAF12_ARATH	TAF1B_ARATH	TA12B_ARATH
biological_process	GO:0009607	response to biotic stimulus	4	36	0.111111	0.0876851	0.924908	1	1	MLO15_ARATH	MLO5_ARATH	F4IT46_ARATH	Q9M0C8_ARATH
biological_process	GO:0010052	guard cell differentiation	4	23	0.173913	0.838461	0.335784	1	1	MYB88_ARATH	DOF57_ARATH	FAMA_ARATH	A0A1I9LN81_ARATH
biological_process	GO:0006405	RNA export from nucleus	4	9	0.444444	0.999994	2.44163e-05	1	0.028	NP214_ARATH	NU98B_ARATH	NU155_ARATH	F4JUG3_ARATH
molecular_function	GO:0030955	potassium ion binding	4	17	0.235294	0.958396	0.131512	1	1	PKP1_ARATH	Q9SJQ0_ARATH	A8MR07_ARATH	Q94KE3_ARATH
molecular_function	GO:0004743	pyruvate kinase activity	4	17	0.235294	0.958396	0.131512	1	1	PKP1_ARATH	Q9SJQ0_ARATH	A8MR07_ARATH	Q94KE3_ARATH
biological_process	GO:0010051	xylem and phloem pattern formation	4	28	0.142857	0.988973	0.0245134	1	1	M2K2_ARATH	MPK10_ARATH	PRP16_ARATH	ARFE_ARATH
biological_process	GO:1902074	response to salt	4	29	0.137931	0.704925	0.50027	1	1	CMKMT_ARATH	LUH_ARATH	LEUNG_ARATH	Q8RWV9_ARATH
cellular_component	GO:0000793	condensed chromosome	4	9	0.444444	0.999868	0.000383058	1	0.081	SMC21_ARATH	SMC22_ARATH	CND2_ARATH	F4JIJ1_ARATH
biological_process	GO:0042138	meiotic DNA double-strand break formation	4	17	0.235294	0.959242	0.129568	1	1	MRE11_ARATH	PRD1_ARATH	A0A1P8B861_ARATH	F4HU48_ARATH
molecular_function	GO:0035064	methylated histone binding	4	18	0.222222	0.935799	0.178168	1	1	ING2_ARATH	PTM_ARATH	AGDP1_ARATH	F4HWW1_ARATH
biological_process	GO:0071215	cellular response to abscisic acid stimulus	4	35	0.114286	0.888738	0.146723	1	1	BZP63_ARATH	AHK3_ARATH	AHK2_ARATH	CIP1_ARATH
molecular_function	GO:0010333	terpene synthase activity	4	42	0.0952381	0.395878	0.777904	1	1	LINS_ARATH	TPS05_ARATH	F4HVE4_ARATH	A0A1P8B0J1_ARATH
biological_process	GO:0005992	trehalose biosynthetic process	4	25	0.16	0.838461	0.335784	1	1	TPPI_ARATH	F4KFG6_ARATH	A0A1P8BH94_ARATH	A0A178UDH6_ARATH
molecular_function	GO:0004805	trehalose-phosphatase activity	4	19	0.210526	0.935799	0.178168	1	1	TPPI_ARATH	F4KFG6_ARATH	A0A1P8BH94_ARATH	A0A178UDH6_ARATH
biological_process	GO:0031146	SCF-dependent proteasomal ubiquitin-dependent protein catabolic process	4	87	0.045977	0.0196585	0.993714	1	1	FB190_ARATH	FB189_ARATH	Q8H1Q4_ARATH	F4J048_ARATH
biological_process	GO:0045037	protein import into chloroplast stroma	4	27	0.148148	0.728647	0.473793	1	1	TIC40_ARATH	TI214_ARATH	TI100_ARATH	YCF2_ARATH
molecular_function	GO:0031267	small GTPase binding	4	34	0.117647	0.62775	0.580309	1	1	PIR_ARATH	TNPO1_ARATH	XPOT_ARATH	B3H6L9_ARATH
biological_process	GO:0034051	negative regulation of plant-type hypersensitive response	4	8	0.5	0.999092	0.00891905	1	1	RIN4_ARATH	BPA1_ARATH	RIN13_ARATH	F4HVJ0_ARATH
biological_process	GO:0010233	phloem transport	4	12	0.333333	0.970464	0.0907417	1	1	GAI_ARATH	SMXL4_ARATH	SMXL5_ARATH	CALS7_ARATH
biological_process	GO:0009744	response to sucrose	4	70	0.0571429	0.166973	0.913369	1	1	GLTB1_ARATH	FLZ8_ARATH	SAG12_ARATH	PSI3_ARATH
biological_process	GO:0047484	regulation of response to osmotic stress	4	14	0.285714	0.96722	0.0743072	1	1	SLK1_ARATH	LUH_ARATH	RZF1_ARATH	WRK70_ARATH
biological_process	GO:0008284	positive regulation of cell population proliferation	4	27	0.148148	0.796748	0.391666	1	1	E2FB_ARATH	MED14_ARATH	WOX9_ARATH	ATHB8_ARATH
molecular_function	GO:0030145	manganese ion binding	4	64	0.0625	0.11333	0.952788	1	1	MRE11_ARATH	GL11_ARATH	GL21_ARATH	A0A1P8BB63_ARATH
biological_process	GO:0051781	positive regulation of cell division	4	12	0.333333	0.982255	0.0720167	1	1	BLI_ARATH	BRE1A_ARATH	DPB2_ARATH	CLASP_ARATH
cellular_component	GO:0070062	extracellular exosome	4	12	0.333333	0.9931	0.0365102	1	1	SEC3A_ARATH	SECAB_ARATH	SECAA_ARATH	F4KGM7_ARATH
cellular_component	GO:0000974	Prp19 complex	4	19	0.210526	0.94755	0.153957	1	1	C3H25_ARATH	C3H53_ARATH	Q9LK52_ARATH	Q9ZVX7_ARATH
molecular_function	GO:0008378	galactosyltransferase activity	4	28	0.142857	0.485627	0.676874	1	1	B3GT5_ARATH	B3GT7_ARATH	B3GTJ_ARATH	B3H4Y4_ARATH
cellular_component	GO:0005876	spindle microtubule	4	17	0.235294	0.923696	0.200087	1	1	IQD5_ARATH	KN14D_ARATH	CLASP_ARATH	AUR1_ARATH
biological_process	GO:0000070	mitotic sister chromatid segregation	4	9	0.444444	0.996563	0.00802973	1	1	TBG2_ARATH	WAPL1_ARATH	WAPL2_ARATH	TBG1_ARATH
molecular_function	GO:0070290	N-acylphosphatidylethanolamine-specific phospholipase D activity	4	24	0.166667	0.855471	0.311506	1	1	PLDZ1_ARATH	A0A1I9LQ38_ARATH	A0A1I9LQ42_ARATH	A0A1I9LQ40_ARATH
molecular_function	GO:0004630	phospholipase D activity	4	24	0.166667	0.855471	0.311506	1	1	PLDZ1_ARATH	A0A1I9LQ38_ARATH	A0A1I9LQ42_ARATH	A0A1I9LQ40_ARATH
biological_process	GO:0032876	negative regulation of DNA endoreduplication	4	7	0.571429	0.999623	0.00491355	1	0.996	SC24A_ARATH	GTL1_ARATH	E2FE_ARATH	F4IIV5_ARATH
biological_process	GO:0006879	cellular iron ion homeostasis	4	18	0.222222	0.920699	0.16582	1	1	AB25B_ARATH	BTSL1_ARATH	BTSL2_ARATH	AB23B_ARATH
biological_process	GO:0016571	histone methylation	4	17	0.235294	0.994146	0.0126188	1	1	VIP6_ARATH	EMF1_ARATH	O64572_ARATH	Q9SZQ2_ARATH
cellular_component	GO:0005771	multivesicular body	4	28	0.142857	0.860982	0.281479	1	1	FREE1_ARATH	TOL6_ARATH	VPS2A_ARATH	BRO1_ARATH
biological_process	GO:0006413	translational initiation	4	27	0.148148	0.14298	0.937695	1	1	EIF3A_ARATH	PABP5_ARATH	EIF3D_ARATH	F4J1N5_ARATH
biological_process	GO:0010252	auxin homeostasis	4	38	0.105263	0.535506	0.665639	1	1	TCP15_ARATH	GH34_ARATH	AXL1_ARATH	Q9LTD6_ARATH
biological_process	GO:0046855	inositol phosphate dephosphorylation	4	23	0.173913	0.876213	0.280274	1	1	IP5PC_ARATH	IP5PE_ARATH	DPNP2_ARATH	F4IRT2_ARATH
molecular_function	GO:0031072	heat shock protein binding	4	24	0.166667	0.474395	0.699869	1	1	DNAJ1_ARATH	GFA2_ARATH	F4HWI4_ARATH	A0A1P8APZ8_ARATH
biological_process	GO:0010229	inflorescence development	4	17	0.235294	0.945871	0.142118	1	1	BLH8_ARATH	TCP14_ARATH	TCP15_ARATH	U1165_ARATH
biological_process	GO:0015986	ATP synthesis coupled proton transport	4	33	0.121212	0.535506	0.665639	1	1	ATP61_ARATH	ATPA_ARATH	Q42139_ARATH	A0A178U7J2_ARATH
biological_process	GO:0009786	regulation of asymmetric cell division	4	16	0.25	0.959242	0.129568	1	1	LBD27_ARATH	A2RVL9_ARATH	F4ITB8_ARATH	Q9LMY2_ARATH
molecular_function	GO:0051536	iron-sulfur cluster binding	4	24	0.166667	0.994127	0.0100145	1	0.999	HF101_ARATH	SIRB_ARATH	PAO_ARATH	F4IE99_ARATH
biological_process	GO:1900034	regulation of cellular response to heat	4	6	0.666667	0.999974	0.000271621	1	0.307	HIT4_ARATH	A0A1P8BD37_ARATH	F4KF59_ARATH	F4KGF3_ARATH
biological_process	GO:0048765	root hair cell differentiation	4	15	0.266667	0.943402	0.09189	1	1	LRL1_ARATH	LRL2_ARATH	GNOM_ARATH	GPDL3_ARATH
molecular_function	GO:0017070	U6 snRNA binding	4	8	0.5	0.999068	0.00909608	1	0.999	PRP8A_ARATH	PRP8B_ARATH	C3H25_ARATH	C3H53_ARATH
biological_process	GO:0009851	auxin biosynthetic process	4	40	0.1	0.399137	0.749087	1	1	ALDO4_ARATH	ALDO1_ARATH	ALDO2_ARATH	ALDO3_ARATH
biological_process	GO:0071704	organic substance metabolic process	4	27	0.148148	0.98771	0.0137647	1	1	Q9LTM8_ARATH	F4KH85_ARATH	A0A1I9LMY2_ARATH	A0A1I9LMY1_ARATH
biological_process	GO:0070588	calcium ion transmembrane transport	4	22	0.181818	0.751934	0.446801	1	1	PAM71_ARATH	ECA1_ARATH	ECA4_ARATH	GDT14_ARATH
biological_process	GO:0010223	secondary shoot formation	4	20	0.2	0.966592	0.0793008	1	1	BLH8_ARATH	MBD9_ARATH	TCP18_ARATH	ASHH2_ARATH
biological_process	GO:0042594	response to starvation	4	20	0.2	0.59589	0.488796	1	1	AT18F_ARATH	FLZ8_ARATH	AT18A_ARATH	AT18G_ARATH
molecular_function	GO:0008195	phosphatidate phosphatase activity	4	11	0.363636	0.994336	0.0320973	1	1	PAH2_ARATH	PAH1_ARATH	A0A1P8BB14_ARATH	F4K347_ARATH
biological_process	GO:0034497	protein localization to phagophore assembly site	4	9	0.444444	0.998154	0.0145777	1	1	ATG9_ARATH	AT18D_ARATH	AT13A_ARATH	AT18A_ARATH
molecular_function	GO:0005543	phospholipid binding	4	37	0.108108	0.766917	0.312098	1	1	EPN2_ARATH	PLA2A_ARATH	SNX2B_ARATH	EPN3_ARATH
biological_process	GO:0007010	cytoskeleton organization	4	19	0.210526	1	2.36279e-15	1	0	VILI1_ARATH	Q8RX25_ARATH	A0A1P8B7W9_ARATH	A0A178W3E8_ARATH
molecular_function	GO:0031624	ubiquitin conjugating enzyme binding	4	48	0.0833333	0.317913	0.832901	1	1	ARI1_ARATH	ARI12_ARATH	Q1PDK3_ARATH	Q9M1F1_ARATH
biological_process	GO:0032436	positive regulation of proteasomal ubiquitin-dependent protein catabolic process	4	44	0.0909091	0.979516	0.0461939	1	1	ARI1_ARATH	DET1_ARATH	ARI12_ARATH	Q9M1F1_ARATH
cellular_component	GO:0005847	mRNA cleavage and polyadenylation specificity factor complex	4	9	0.444444	0.998537	0.0122008	1	0.965	CPSF_ARATH	CTF64_ARATH	Q9SAF2_ARATH	Q9M033_ARATH
biological_process	GO:0019853	L-ascorbic acid biosynthetic process	4	24	0.166667	0.704925	0.50027	1	1	GGLO2_ARATH	GGLO4_ARATH	GGLO5_ARATH	GGLO6_ARATH
molecular_function	GO:0015020	glucuronosyltransferase activity	4	30	0.133333	0.754637	0.421188	1	1	GT14A_ARATH	U85A1_ARATH	Q9ZQZ7_ARATH	Q9C9A1_ARATH
biological_process	GO:0005982	starch metabolic process	4	18	0.222222	0.621956	0.504885	1	1	SSY4_ARATH	SWTIE_ARATH	GLGB2_ARATH	B3H7F6_ARATH
biological_process	GO:0007019	microtubule depolymerization	4	6	0.666667	0.999842	0.0018458	1	0.907	KTN82_ARATH	KTN83_ARATH	KTN84_ARATH	F4I7E1_ARATH
molecular_function	GO:0008061	chitin binding	4	27	0.148148	0.793606	0.395746	1	1	CHI59_ARATH	CHI5_ARATH	CHI58_ARATH	F4JTY8_ARATH
molecular_function	GO:0004568	chitinase activity	4	28	0.142857	0.7713	0.423587	1	1	CHI59_ARATH	CHI5_ARATH	CHI58_ARATH	F4JTY8_ARATH
biological_process	GO:0006032	chitin catabolic process	4	30	0.133333	0.728647	0.473793	1	1	CHI59_ARATH	CHI5_ARATH	CHI58_ARATH	F4JTY8_ARATH
molecular_function	GO:0004392	heme oxygenase (decyclizing) activity	4	9	0.444444	0.998107	0.0148587	1	1	HMOX2_ARATH	F4IUM0_ARATH	A0A1P8B2J8_ARATH	F4IUL9_ARATH
biological_process	GO:0006788	heme oxidation	4	7	0.571429	0.999623	0.00491355	1	0.996	HMOX2_ARATH	F4IUM0_ARATH	A0A1P8B2J8_ARATH	F4IUL9_ARATH
biological_process	GO:0072318	clathrin coat disassembly	4	7	0.571429	0.999623	0.00491355	1	0.996	AUXI2_ARATH	AUL1_ARATH	JAC1_ARATH	Q9XI12_ARATH
molecular_function	GO:0070122	isopeptidase activity	4	24	0.166667	0.793606	0.395746	1	1	PRP8A_ARATH	PRP8B_ARATH	AMSH3_ARATH	A0A2H1ZEN3_ARATH
biological_process	GO:0009089	lysine biosynthetic process via diaminopimelate	4	16	0.25	0.968249	0.108672	1	1	AKH2_ARATH	DCDA2_ARATH	DAPB3_ARATH	DCDA1_ARATH
molecular_function	GO:0004031	aldehyde oxidase activity	4	5	0.8	0.999613	0.00501391	1	0.959	ALDO4_ARATH	ALDO1_ARATH	ALDO2_ARATH	ALDO3_ARATH
biological_process	GO:1990110	callus formation	4	21	0.190476	0.909258	0.226436	1	1	PIL1_ARATH	AIL7_ARATH	EF115_ARATH	F4KGW7_ARATH
biological_process	GO:0080113	regulation of seed growth	4	17	0.235294	0.959242	0.129568	1	1	IKU1_ARATH	DA1_ARATH	VQ5_ARATH	Q3EBM8_ARATH
biological_process	GO:0080086	stamen filament development	4	11	0.363636	0.99447	0.0315247	1	1	LOX4_ARATH	LOX3_ARATH	TCP15_ARATH	MYB57_ARATH
molecular_function	GO:0000049	tRNA binding	4	54	0.0740741	0.221724	0.893735	1	1	CTU2_ARATH	XPOT_ARATH	F4J7V2_ARATH	F4I824_ARATH
biological_process	GO:0006270	DNA replication initiation	4	26	0.153846	0.891841	0.221431	1	1	MCM6_ARATH	Q5XVE2_ARATH	A0A1P8AWF3_ARATH	F4HPK7_ARATH
molecular_function	GO:0043424	protein histidine kinase binding	4	25	0.16	0.835803	0.339565	1	1	AHK3_ARATH	APBLA_ARATH	TRF1A_ARATH	AHK2_ARATH
molecular_function	GO:0008753	NADPH dehydrogenase (quinone) activity	4	8	0.5	0.999068	0.00909608	1	0.999	FQRL1_ARATH	FQRL2_ARATH	A0A1P8B767_ARATH	A0A1P8B765_ARATH
molecular_function	GO:0008353	RNA polymerase II CTD heptapeptide repeat kinase activity	4	28	0.142857	0.7713	0.423587	1	1	CDKE1_ARATH	Q9FKV9_ARATH	Q9LNN0_ARATH	F4I854_ARATH
biological_process	GO:0010332	response to gamma radiation	4	11	0.363636	0.987396	0.0565104	1	1	CHR8_ARATH	ERCC1_ARATH	NAC8_ARATH	BRCA1_ARATH
biological_process	GO:0006812	cation transport	4	12	0.333333	0.189236	0.853507	1	1	CCX1_ARATH	CSC1_ARATH	GRS16_ARATH	OEP37_ARATH
molecular_function	GO:0004673	protein histidine kinase activity	4	8	0.5	0.999993	5.21998e-05	1	0.022	CKI1_ARATH	AHK3_ARATH	ERS1_ARATH	AHK2_ARATH
biological_process	GO:0060236	regulation of mitotic spindle organization	4	17	0.235294	0.948842	0.151971	1	1	TPX2_ARATH	A0A1P8BGZ9_ARATH	F4K9T9_ARATH	F4K9U0_ARATH
biological_process	GO:0005978	glycogen biosynthetic process	4	10	0.4	0.996664	0.0220719	1	1	GLGB2_ARATH	GLGL1_ARATH	GLGL2_ARATH	GLGS_ARATH
biological_process	GO:2000652	regulation of secondary cell wall biogenesis	4	25	0.16	0.834774	0.319121	1	1	IQD14_ARATH	NAC10_ARATH	MYC2_ARATH	E70A1_ARATH
biological_process	GO:0010439	regulation of glucosinolate biosynthetic process	4	11	0.363636	0.99447	0.0315247	1	1	MYB29_ARATH	MYB76_ARATH	DOF11_ARATH	Q2V4Q1_ARATH
molecular_function	GO:0032977	membrane insertase activity	4	15	0.266667	0.975373	0.0908744	1	1	ALB4_ARATH	OXA1_ARATH	ALB33_ARATH	F4I9A9_ARATH
molecular_function	GO:0008318	protein prenyltransferase activity	4	5	0.8	0.981857	0.0732083	1	1	O80601_ARATH	A0A1P8AV10_ARATH	A0A1P8AUX8_ARATH	A0A1P8AV19_ARATH
biological_process	GO:0016441	posttranscriptional gene silencing	4	9	0.444444	1	3.67591e-08	1	0	SKI2_ARATH	SKI3_ARATH	SAHH1_ARATH	AGO1_ARATH
cellular_component	GO:0070847	core mediator complex	4	8	0.5	0.999284	0.00742834	1	0.863	MED17_ARATH	MED4_ARATH	MED6_ARATH	MED14_ARATH
biological_process	GO:0051604	protein maturation	4	7	0.571429	0.241281	0.840136	1	1	MIP3_ARATH	MIP2_ARATH	SNX2B_ARATH	F4IP68_ARATH
biological_process	GO:0007095	mitotic G2 DNA damage checkpoint signaling	4	6	0.666667	0.999881	0.00232127	1	0.957	MRE11_ARATH	NBS1_ARATH	A0A1P8AWF3_ARATH	F4KHP4_ARATH
cellular_component	GO:0042555	MCM complex	4	16	0.25	0.973932	0.0939788	1	1	MCM2_ARATH	MCM6_ARATH	MCMBP_ARATH	F4HPK7_ARATH
biological_process	GO:0000913	preprophase band assembly	4	7	0.571429	0.999623	0.00491355	1	0.996	KN14A_ARATH	TON2_ARATH	Q6NQ74_ARATH	Q9M2F2_ARATH
cellular_component	GO:0031931	TORC1 complex	4	10	0.4	0.997342	0.0185628	1	0.998	RTOR2_ARATH	A0A1P8BAR8_ARATH	A0A1P8BAT3_ARATH	A0A1P8BAS5_ARATH
biological_process	GO:0031929	TOR signaling	4	11	0.363636	0.982255	0.0720167	1	1	RTOR2_ARATH	A0A1P8BAR8_ARATH	A0A1P8BAT3_ARATH	A0A1P8BAS5_ARATH
molecular_function	GO:0004298	threonine-type endopeptidase activity	4	18	0.222222	0.947809	0.154175	1	1	PSB7B_ARATH	PSB7A_ARATH	F4KIN7_ARATH	F4IWI5_ARATH
biological_process	GO:0019284	L-methionine salvage from S-adenosylmethionine	4	6	0.666667	0.999881	0.00232127	1	0.957	MTBC_ARATH	A0A1P8BAY5_ARATH	F4JYQ6_ARATH	F4JYQ5_ARATH
biological_process	GO:0048017	inositol lipid-mediated signaling	4	5	0.8	0.996602	0.0135021	1	1	PLDZ1_ARATH	A0A1I9LQ38_ARATH	A0A1I9LQ42_ARATH	A0A1I9LQ40_ARATH
cellular_component	GO:0055087	Ski complex	4	4	1	1	0.000153705	1	0.035	SKI2_ARATH	SKI3_ARATH	F4I3Z6_ARATH	A0A1P8AR19_ARATH
molecular_function	GO:0004013	adenosylhomocysteinase activity	4	5	0.8	0.999977	0.000871738	1	0.427	SAHH1_ARATH	SAHH2_ARATH	A8MQP1_ARATH	F4JTV4_ARATH
cellular_component	GO:0019773	proteasome core complex, alpha-subunit complex	4	17	0.235294	0.966373	0.112549	1	1	PSA6A_ARATH	PSA6B_ARATH	F4IIA5_ARATH	A0A1P8B073_ARATH
biological_process	GO:0048208	COPII vesicle coating	4	4	1	0.99447	0.0315247	1	1	SC16B_ARATH	MAG5_ARATH	A0A1P8BE45_ARATH	A0A1P8B9X0_ARATH
molecular_function	GO:0080043	quercetin 3-O-glucosyltransferase activity	4	64	0.0625	0.11333	0.952788	1	1	U76E3_ARATH	U76C1_ARATH	U85A1_ARATH	F4J962_ARATH
molecular_function	GO:0080044	quercetin 7-O-glucosyltransferase activity	4	56	0.0714286	0.195154	0.909175	1	1	U76E3_ARATH	U76C1_ARATH	U85A1_ARATH	F4J962_ARATH
molecular_function	GO:0043874	acireductone synthase activity	4	4	1	1	0.00019247	1	0.137	MTBC_ARATH	A0A1P8BAY5_ARATH	A0A1P8BAY8_ARATH	A0A178UQC1_ARATH
molecular_function	GO:0046570	methylthioribulose 1-phosphate dehydratase activity	4	4	1	1	0.00019247	1	0.137	MTBC_ARATH	A0A1P8BAY5_ARATH	F4JYQ6_ARATH	F4JYQ5_ARATH
biological_process	GO:1990918	double-strand break repair involved in meiotic recombination	4	5	0.8	0.999978	0.000853309	1	0.647	A0A1P8AV25_ARATH	F4IHC3_ARATH	F4HUN8_ARATH	F4JIJ1_ARATH
molecular_function	GO:0061666	UFM1 ligase activity	4	4	1	1	0.00019247	1	0.137	UFL1_ARATH	F4J7Z8_ARATH	F4J7Z6_ARATH	A0A1I9LTL2_ARATH
biological_process	GO:1905037	autophagosome organization	4	4	1	0.999997	1.65526e-05	1	0.018	TRF1A_ARATH	TRF1B_ARATH	ATG1B_ARATH	ATG1C_ARATH
cellular_component	GO:0005881	cytoplasmic microtubule	4	9	0.444444	0.970317	0.0653673	1	1	CLASP_ARATH	Q9LEQ9_ARATH	Q9SGH3_ARATH	F4J8S4_ARATH
biological_process	GO:0000077	DNA damage checkpoint signaling	4	8	0.5	1	6.93405e-07	1	0.001	NAC8_ARATH	Q9CAP6_ARATH	Q058K5_ARATH	F4J7B9_ARATH
molecular_function	GO:0050302	indole-3-acetaldehyde oxidase activity	4	6	0.666667	0.999877	0.00237003	1	0.834	ALDO4_ARATH	ALDO1_ARATH	ALDO2_ARATH	ALDO3_ARATH
cellular_component	GO:0005815	microtubule organizing center	4	17	0.235294	1	4.40606e-07	1	0	A0A1I9LLT7_ARATH	Q940S9_ARATH	F4J4K6_ARATH	A0A1I9LLT8_ARATH
molecular_function	GO:0003885	D-arabinono-1,4-lactone oxidase activity	4	9	0.444444	0.998107	0.0148587	1	1	GGLO2_ARATH	GGLO4_ARATH	GGLO5_ARATH	GGLO6_ARATH
molecular_function	GO:0050105	L-gulonolactone oxidase activity	4	7	0.571429	0.999613	0.00501391	1	0.959	GGLO2_ARATH	GGLO4_ARATH	GGLO5_ARATH	GGLO6_ARATH
molecular_function	GO:0016832	aldehyde-lyase activity	4	6	0.666667	0.62775	0.580309	1	1	A0A1P8AVD8_ARATH	Q8VYC5_ARATH	B3H739_ARATH	F4IAP5_ARATH
biological_process	GO:0006384	transcription initiation from RNA polymerase III promoter	4	22	0.181818	0.955109	0.123787	1	1	Q94HW6_ARATH	A0A1P8AML5_ARATH	F4I7J9_ARATH	F4I7K0_ARATH
cellular_component	GO:0000127	transcription factor TFIIIC complex	4	18	0.222222	0.957588	0.132587	1	1	Q94HW6_ARATH	A0A1P8AML5_ARATH	F4I7J9_ARATH	F4I7K0_ARATH
molecular_function	GO:0098599	palmitoyl hydrolase activity	4	5	0.8	0.998107	0.0148587	1	1	Q84JI7_ARATH	Q9LVS4_ARATH	Q9LY31_ARATH	A0A1P8B5G7_ARATH
cellular_component	GO:0030896	checkpoint clamp complex	4	5	0.8	0.999983	0.000700121	1	0.148	Q709F6_ARATH	Q058K5_ARATH	F4J7B9_ARATH	F4J7B7_ARATH
molecular_function	GO:0004518	nuclease activity	3	27	0.111111	0.987552	0.017584	1	1	C3H65_ARATH	A0A1I9LSV8_ARATH	F4IUS5_ARATH
molecular_function	GO:0005546	phosphatidylinositol-4,5-bisphosphate binding	3	27	0.111111	0.604254	0.631993	1	1	SEC3A_ARATH	SEC3B_ARATH	P4KA1_ARATH
biological_process	GO:0010183	pollen tube guidance	3	37	0.0810811	0.355534	0.825017	1	1	MIK2_ARATH	PRK6_ARATH	MAA3_ARATH
biological_process	GO:0046739	transport of virus in multicellular host	3	5	0.6	0.956999	0.158343	1	1	PDLP1_ARATH	PDLP2_ARATH	PDLP3_ARATH
biological_process	GO:0009749	response to glucose	3	46	0.0652174	0.348276	0.78871	1	1	FLZ8_ARATH	SAG12_ARATH	Q8VYM7_ARATH
biological_process	GO:0002221	pattern recognition receptor signaling pathway	3	16	0.1875	0.719726	0.516055	1	1	M3K3A_ARATH	BIK1_ARATH	LRK62_ARATH
biological_process	GO:0072593	reactive oxygen species metabolic process	3	16	0.1875	0.0133374	0.993251	0.998	1	CRK2_ARATH	ATA15_ARATH	Q9FJC9_ARATH
molecular_function	GO:0070300	phosphatidic acid binding	3	17	0.176471	0.868488	0.323899	1	1	PDPK1_ARATH	P4KA1_ARATH	PRAF1_ARATH
cellular_component	GO:0030176	integral component of endoplasmic reticulum membrane	3	57	0.0526316	0.0743556	0.966092	1	1	UTR5B_ARATH	RBL15_ARATH	ECA1_ARATH
biological_process	GO:0006520	cellular amino acid metabolic process	3	56	0.0535714	0.00158597	0.999012	0.483	1	1A15_ARATH	Q8S9L3_ARATH	F4JTK8_ARATH
biological_process	GO:0007031	peroxisome organization	3	26	0.115385	0.500785	0.677331	1	1	PEX14_ARATH	AB2D_ARATH	AB1D_ARATH
biological_process	GO:0007005	mitochondrion organization	3	41	0.0731707	0.230221	0.834886	1	1	Y5520_ARATH	CLU_ARATH	F4J5S0_ARATH
biological_process	GO:0048015	phosphatidylinositol-mediated signaling	3	18	0.166667	0.848029	0.354553	1	1	P4KA1_ARATH	PLCD4_ARATH	A0A1P8AWA3_ARATH
biological_process	GO:0006541	glutamine metabolic process	3	44	0.0681818	0.295666	0.836399	1	1	CARB_ARATH	GFAT1_ARATH	F4JBH6_ARATH
biological_process	GO:0048825	cotyledon development	3	38	0.0789474	0.721903	0.429681	1	1	PDF2_ARATH	GIF1_ARATH	F4JU14_ARATH
molecular_function	GO:0003756	protein disulfide isomerase activity	3	26	0.115385	0.632306	0.605743	1	1	PDI11_ARATH	PDI12_ARATH	F4HZN9_ARATH
biological_process	GO:0043067	regulation of programmed cell death	3	21	0.142857	0.983721	0.0344205	1	1	PDI11_ARATH	BRG1_ARATH	ASHH2_ARATH
biological_process	GO:0010244	response to low fluence blue light stimulus by blue low-fluence system	3	8	0.375	0.991081	0.0572398	1	1	PHYB_ARATH	PIF5_ARATH	PIF4_ARATH
molecular_function	GO:0030570	pectate lyase activity	3	34	0.0882353	0.419691	0.781214	1	1	PLY12_ARATH	Q9SF49_ARATH	Q9FY87_ARATH
biological_process	GO:0015908	fatty acid transport	3	6	0.5	0.99981	0.00131591	1	0.767	LTG15_ARATH	FAX1_ARATH	AB11G_ARATH
molecular_function	GO:0015386	potassium:proton antiporter activity	3	12	0.25	0.956242	0.160229	1	1	KEA2_ARATH	KEA1_ARATH	F4JHE9_ARATH
molecular_function	GO:0016747	acyltransferase activity, transferring groups other than amino-acyl groups	3	99	0.030303	0.000124381	0.999938	0.014	1	Q9S808_ARATH	Q9FJN0_ARATH	A0A1P8B6E6_ARATH
biological_process	GO:0006863	purine nucleobase transport	3	19	0.157895	0.773564	0.453631	1	1	PUP7_ARATH	PUP8_ARATH	PUP12_ARATH
molecular_function	GO:0003993	acid phosphatase activity	3	53	0.0566038	0.0982775	0.964885	1	1	PPA28_ARATH	PPA29_ARATH	Q9FNC4_ARATH
biological_process	GO:0000462	maturation of SSU-rRNA from tricistronic rRNA transcript (SSU-rRNA, 5.8S rRNA, LSU-rRNA)	3	30	0.1	0.355534	0.825017	1	1	HEAT1_ARATH	NOF1_ARATH	Q9ASU6_ARATH
biological_process	GO:0009742	brassinosteroid mediated signaling pathway	3	91	0.032967	0.00243014	0.999473	0.639	1	BSK4_ARATH	WRK70_ARATH	F4K9L3_ARATH
cellular_component	GO:0005685	U1 snRNP	3	28	0.107143	0.61918	0.617355	1	1	PR39B_ARATH	PR40A_ARATH	PR40B_ARATH
cellular_component	GO:0005682	U5 snRNP	3	21	0.142857	0.799913	0.419574	1	1	PRP8A_ARATH	PRP8B_ARATH	F4HWZ0_ARATH
biological_process	GO:0009058	biosynthetic process	3	64	0.046875	0.98871	0.0127561	1	1	AAT1_ARATH	Q9CAP1_ARATH	F4IM97_ARATH
biological_process	GO:0010072	primary shoot apical meristem specification	3	14	0.214286	0.927983	0.220768	1	1	VCS_ARATH	TPR4_ARATH	ATHB8_ARATH
molecular_function	GO:0008308	voltage-gated anion channel activity	3	21	0.142857	0.373158	0.813373	1	1	SLAH3_ARATH	SLAH4_ARATH	A0A2H1ZE94_ARATH
molecular_function	GO:0019904	protein domain specific binding	3	65	0.0461538	0.0788029	0.969216	1	1	RBL11_ARATH	CPNB1_ARATH	Q42139_ARATH
molecular_function	GO:0015078	proton transmembrane transporter activity	3	37	0.0810811	0.00338015	0.998531	0.463	1	ATP61_ARATH	Q42139_ARATH	A0A178U7J2_ARATH
biological_process	GO:0007034	vacuolar transport	3	23	0.130435	0.993059	0.01323	1	1	VSR1_ARATH	VPS51_ARATH	A0A1P8AZU4_ARATH
biological_process	GO:0030968	endoplasmic reticulum unfolded protein response	3	27	0.111111	0.473851	0.741168	1	1	RBL15_ARATH	IAN4_ARATH	OS9_ARATH
biological_process	GO:0006807	nitrogen compound metabolic process	3	31	0.0967742	1	4.47919e-07	1	0.001	PTR1_ARATH	CARB_ARATH	Q9FKZ6_ARATH
biological_process	GO:0048359	mucilage metabolic process involved in seed coat development	3	7	0.428571	0.998253	0.00789394	1	1	SBT17_ARATH	LUH_ARATH	LEUNG_ARATH
molecular_function	GO:0005315	inorganic phosphate transmembrane transporter activity	3	20	0.15	0.796696	0.424751	1	1	PHT21_ARATH	ANTR1_ARATH	ANTR2_ARATH
molecular_function	GO:0008113	peptide-methionine (S)-S-oxide reductase activity	3	6	0.5	0.99763	0.0248242	1	1	MSRA1_ARATH	MSRA3_ARATH	A0A1P8BF28_ARATH
molecular_function	GO:0003951	NAD+ kinase activity	3	24	0.125	0.688494	0.54963	1	1	NADK2_ARATH	DGK6_ARATH	F4HY34_ARATH
biological_process	GO:2000031	regulation of salicylic acid mediated signaling pathway	3	33	0.0909091	0.355534	0.825017	1	1	CPSF_ARATH	WRK70_ARATH	MD20A_ARATH
cellular_component	GO:0005666	RNA polymerase III complex	3	38	0.0789474	0.375703	0.811207	1	1	NRPE1_ARATH	NRPC2_ARATH	A0A1P8B756_ARATH
molecular_function	GO:0015112	nitrate transmembrane transporter activity	3	18	0.166667	0.604254	0.631993	1	1	NRT26_ARATH	NRT23_ARATH	PTR47_ARATH
biological_process	GO:0015706	nitrate transport	3	23	0.130435	0.2585	0.884467	1	1	NRG2_ARATH	NRT26_ARATH	NRT23_ARATH
biological_process	GO:0010167	response to nitrate	3	25	0.12	0.816747	0.343383	1	1	GPMA2_ARATH	NRG2_ARATH	PTR47_ARATH
biological_process	GO:0015995	chlorophyll biosynthetic process	3	50	0.06	0.0647764	0.975496	1	1	RER5_ARATH	CHLG_ARATH	HEM13_ARATH
biological_process	GO:0048831	regulation of shoot system development	3	12	0.25	0.999365	0.00128983	1	0.758	AHK3_ARATH	P4KA1_ARATH	AHK2_ARATH
biological_process	GO:0010582	floral meristem determinacy	3	23	0.130435	0.719726	0.516055	1	1	RBLOT_ARATH	ARFC_ARATH	ERF86_ARATH
biological_process	GO:1901002	positive regulation of response to salt stress	3	12	0.25	0.956999	0.158343	1	1	CDPKT_ARATH	WRKY8_ARATH	MYB88_ARATH
biological_process	GO:0007129	homologous chromosome pairing at meiosis	3	15	0.2	0.834774	0.319121	1	1	SYCP1_ARATH	ASY1_ARATH	F4JIJ1_ARATH
biological_process	GO:0032875	regulation of DNA endoreduplication	3	26	0.115385	0.97575	0.0611893	1	1	DA1_ARATH	MB3R4_ARATH	MYB88_ARATH
cellular_component	GO:0031901	early endosome membrane	3	17	0.176471	0.887451	0.292505	1	1	VA722_ARATH	TOL6_ARATH	BIG5_ARATH
cellular_component	GO:0046540	U4/U6 x U5 tri-snRNP complex	3	37	0.0810811	0.397294	0.796451	1	1	Q8LCC7_ARATH	F4HWZ0_ARATH	F4JRD3_ARATH
biological_process	GO:0016458	obsolete gene silencing	3	12	0.25	1	6.46359e-12	1	0	PPP7I_ARATH	RFA2A_ARATH	F4IXI9_ARATH
biological_process	GO:0010928	regulation of auxin mediated signaling pathway	3	16	0.1875	0.58688	0.599134	1	1	CMKMT_ARATH	PIF5_ARATH	PIF4_ARATH
molecular_function	GO:0051787	misfolded protein binding	3	21	0.142857	0.770607	0.457311	1	1	RBL15_ARATH	Q8L745_ARATH	F4JWQ4_ARATH
biological_process	GO:0010588	cotyledon vascular tissue pattern formation	3	17	0.176471	0.870432	0.320789	1	1	AB14G_ARATH	ZWIP6_ARATH	AB11G_ARATH
biological_process	GO:0006312	mitotic recombination	3	9	0.333333	0.987396	0.0565104	1	1	ERCC1_ARATH	MLH1_ARATH	NBS1_ARATH
biological_process	GO:0000470	maturation of LSU-rRNA	3	25	0.12	0.255362	0.873323	1	1	Q8VYC4_ARATH	Q8LCC7_ARATH	F4JRD3_ARATH
cellular_component	GO:0010287	plastoglobule	3	61	0.0491803	0.0802455	0.972333	1	1	SCAR4_ARATH	Y5520_ARATH	AB1K7_ARATH
cellular_component	GO:0031209	SCAR complex	3	8	0.375	0.992572	0.0503019	1	1	SCAR4_ARATH	PIR_ARATH	SCAR2_ARATH
molecular_function	GO:0071933	Arp2/3 complex binding	3	5	0.6	0.999128	0.0135971	1	1	SCAR4_ARATH	SCARL_ARATH	SCAR2_ARATH
molecular_function	GO:0034237	protein kinase A regulatory subunit binding	3	5	0.6	0.999128	0.0135971	1	1	SCAR4_ARATH	SCARL_ARATH	SCAR2_ARATH
biological_process	GO:2000601	positive regulation of Arp2/3 complex-mediated actin nucleation	3	5	0.6	0.999147	0.0133906	1	1	SCAR4_ARATH	SCARL_ARATH	SCAR2_ARATH
cellular_component	GO:0000796	condensin complex	3	8	0.375	0.992572	0.0503019	1	1	SMC21_ARATH	SMC22_ARATH	CND2_ARATH
biological_process	GO:0007076	mitotic chromosome condensation	3	9	0.333333	0.985422	0.0785709	1	1	SMC21_ARATH	SMC22_ARATH	CND2_ARATH
biological_process	GO:0090306	meiotic spindle assembly	3	3	1	1	0.000188291	1	0.254	SMG7_ARATH	WAPL1_ARATH	WAPL2_ARATH
biological_process	GO:0060548	negative regulation of cell death	3	12	0.25	0.996691	0.010321	1	1	SMG7_ARATH	EXA1_ARATH	F4K518_ARATH
molecular_function	GO:0019905	syntaxin binding	3	15	0.2	0.909126	0.256275	1	1	VPS54_ARATH	Q8RXD7_ARATH	F4KAG0_ARATH
biological_process	GO:1900426	positive regulation of defense response to bacterium	3	28	0.107143	0.58061	0.653243	1	1	RIN13_ARATH	SARD1_ARATH	E70H1_ARATH
biological_process	GO:0009862	systemic acquired resistance, salicylic acid mediated signaling pathway	3	23	0.130435	0.719726	0.516055	1	1	NU205_ARATH	WRK70_ARATH	F4JUW0_ARATH
biological_process	GO:0016575	histone deacetylation	3	29	0.103448	0.680879	0.526149	1	1	SNL4_ARATH	Q8RWV9_ARATH	F4JV27_ARATH
cellular_component	GO:0009501	amyloplast	3	13	0.230769	0.985575	0.061718	1	1	TI236_ARATH	SSY4_ARATH	GLGB2_ARATH
biological_process	GO:0045010	actin nucleation	3	10	0.3	0.868369	0.271353	1	1	PIR_ARATH	FH1_ARATH	SCAR2_ARATH
biological_process	GO:0010197	polar nucleus fusion	3	30	0.1	0.526207	0.699648	1	1	SSRP1_ARATH	GFA2_ARATH	Q700D8_ARATH
molecular_function	GO:0030620	U2 snRNA binding	3	7	0.428571	0.994986	0.0396819	1	1	COIL_ARATH	PRP8A_ARATH	PRP8B_ARATH
biological_process	GO:0010105	negative regulation of ethylene-activated signaling pathway	3	22	0.136364	0.746941	0.485301	1	1	ERS1_ARATH	SAB_ARATH	MYB29_ARATH
molecular_function	GO:0070182	DNA polymerase binding	3	6	0.5	0.99763	0.0248242	1	1	RTEL1_ARATH	DPB2_ARATH	F4JIJ1_ARATH
biological_process	GO:0000725	recombinational repair	3	7	0.428571	0.994354	0.0109576	1	1	RTEL1_ARATH	F4HYI1_ARATH	A0A1P8ANI6_ARATH
molecular_function	GO:0031625	ubiquitin protein ligase binding	3	84	0.0357143	0.007965	0.99804	0.78	1	DET1_ARATH	ATL48_ARATH	ALDO3_ARATH
biological_process	GO:0032981	mitochondrial respiratory chain complex I assembly	3	26	0.115385	0.636247	0.601907	1	1	NDUAC_ARATH	Q1JPN1_ARATH	F4IZR4_ARATH
biological_process	GO:0009785	blue light signaling pathway	3	19	0.157895	0.824295	0.388087	1	1	CKL4_ARATH	ARFG_ARATH	NFYA5_ARATH
molecular_function	GO:0004714	transmembrane receptor protein tyrosine kinase activity	3	14	0.214286	0.926792	0.223195	1	1	HT1_ARATH	RLK5_ARATH	RLK6_ARATH
biological_process	GO:0010187	negative regulation of seed germination	3	24	0.125	0.692095	0.54579	1	1	GAI_ARATH	AP2L1_ARATH	RGA_ARATH
biological_process	GO:0006303	double-strand break repair via nonhomologous end joining	3	16	0.1875	0.891328	0.287044	1	1	MRE11_ARATH	DNLI4_ARATH	F4IDZ7_ARATH
biological_process	GO:0009875	pollen-pistil interaction	3	10	0.3	0.000137559	0.999959	0.047	1	M2K1_ARATH	M2K2_ARATH	MAA3_ARATH
molecular_function	GO:0016157	sucrose synthase activity	3	17	0.176471	0.868488	0.323899	1	1	SPSA3_ARATH	SUS5_ARATH	A0A2H1ZE74_ARATH
biological_process	GO:0008299	isoprenoid biosynthetic process	3	25	0.12	0.0433045	0.973488	1	1	HMDH1_ARATH	HMDH2_ARATH	F4HVE4_ARATH
molecular_function	GO:0004523	RNA-DNA hybrid ribonuclease activity	3	69	0.0434783	0.030784	0.99096	0.997	1	O64712_ARATH	Q9M1F1_ARATH	Q9FNQ6_ARATH
biological_process	GO:0016075	rRNA catabolic process	3	17	0.176471	0.608334	0.628187	1	1	DRB1_ARATH	RNC1_ARATH	A0A1P8AQD8_ARATH
biological_process	GO:0060321	acceptance of pollen	3	12	0.25	0.956999	0.158343	1	1	SEC3B_ARATH	SECAB_ARATH	F4HTA1_ARATH
biological_process	GO:0007389	pattern specification process	3	11	0.272727	0.99207	0.0131511	1	1	PLET1_ARATH	PLET2_ARATH	BLH8_ARATH
cellular_component	GO:0031902	late endosome membrane	3	26	0.115385	0.695914	0.509326	1	1	SCY2B_ARATH	FREE1_ARATH	F4J8L1_ARATH
cellular_component	GO:0000795	synaptonemal complex	3	9	0.333333	0.987799	0.0693524	1	1	MRE11_ARATH	SYCP1_ARATH	SCC11_ARATH
biological_process	GO:0051302	regulation of cell division	3	40	0.075	0.955513	0.0804082	1	1	M3KE2_ARATH	E2FB_ARATH	GSO1_ARATH
biological_process	GO:2000067	regulation of root morphogenesis	3	34	0.0882353	0.559403	0.644466	1	1	GSO1_ARATH	MYB36_ARATH	BIG5_ARATH
biological_process	GO:0050826	response to freezing	3	24	0.125	0.911765	0.203252	1	1	LEA7_ARATH	ICE1_ARATH	CMTA1_ARATH
molecular_function	GO:0019887	protein kinase regulator activity	3	22	0.136364	0.00997866	0.996175	0.86	1	PV42B_ARATH	ILA_ARATH	A0A1P8AT97_ARATH
biological_process	GO:0051211	anisotropic cell growth	3	10	0.3	0.977928	0.102785	1	1	CSI3_ARATH	IQD5_ARATH	Q9C6N3_ARATH
biological_process	GO:0090333	regulation of stomatal closure	3	36	0.0833333	0.377574	0.810378	1	1	HT1_ARATH	WRK70_ARATH	GHR1_ARATH
molecular_function	GO:0009378	four-way junction helicase activity	3	8	0.375	0.990904	0.0580334	1	1	RECQ2_ARATH	RQL1_ARATH	RQL3_ARATH
cellular_component	GO:0016363	nuclear matrix	3	9	0.333333	0.987799	0.0693524	1	1	MFP1_ARATH	XPOT_ARATH	Q9S826_ARATH
biological_process	GO:0010102	lateral root morphogenesis	3	16	0.1875	0.807509	0.302155	1	1	RLK5_ARATH	ERF86_ARATH	F4KGM7_ARATH
biological_process	GO:0010584	pollen exine formation	3	31	0.0967742	0.473851	0.741168	1	1	CDKG1_ARATH	DEX1_ARATH	F4KDI6_ARATH
molecular_function	GO:0008327	methyl-CpG binding	3	20	0.15	0.796696	0.424751	1	1	MBD13_ARATH	MBD8_ARATH	MBD9_ARATH
cellular_component	GO:0030897	HOPS complex	3	8	0.375	0.992572	0.0503019	1	1	VPS39_ARATH	VA713_ARATH	F4JHM9_ARATH
molecular_function	GO:0016413	O-acetyltransferase activity	3	45	0.0666667	0.123965	0.953575	1	1	TBL39_ARATH	TBL17_ARATH	TBL27_ARATH
biological_process	GO:0006997	nucleus organization	3	14	0.214286	0.824026	0.295858	1	1	CRWN4_ARATH	NUP1_ARATH	F4JXK3_ARATH
molecular_function	GO:0008420	RNA polymerase II CTD heptapeptide repeat phosphatase activity	3	22	0.136364	0.743754	0.489058	1	1	CPL3_ARATH	A0A1P8B2G0_ARATH	F4KHG9_ARATH
cellular_component	GO:0016282	eukaryotic 43S preinitiation complex	3	23	0.130435	0.750315	0.480474	1	1	EIF3A_ARATH	EIF3D_ARATH	F4J1N5_ARATH
cellular_component	GO:0033290	eukaryotic 48S preinitiation complex	3	25	0.12	0.698503	0.538172	1	1	EIF3A_ARATH	EIF3D_ARATH	F4J1N5_ARATH
cellular_component	GO:0005852	eukaryotic translation initiation factor 3 complex	3	20	0.15	0.72461	0.509771	1	1	EIF3A_ARATH	EIF3D_ARATH	F4J1N5_ARATH
biological_process	GO:0001732	formation of cytoplasmic translation initiation complex	3	28	0.107143	0.58061	0.653243	1	1	EIF3A_ARATH	EIF3D_ARATH	F4J1N5_ARATH
biological_process	GO:0009933	meristem structural organization	3	20	0.15	0.697845	0.437622	1	1	KTI12_ARATH	TEB_ARATH	F4IIV5_ARATH
biological_process	GO:0009787	regulation of abscisic acid-activated signaling pathway	3	20	0.15	0.619151	0.489511	1	1	GRDP1_ARATH	CMKMT_ARATH	MYB96_ARATH
cellular_component	GO:0005844	polysome	3	11	0.272727	0.00521392	0.99856	0.369	1	LRP1B_ARATH	LRP1C_ARATH	XRN4_ARATH
biological_process	GO:0005983	starch catabolic process	3	18	0.166667	0.848029	0.354553	1	1	PULA1_ARATH	ISOA3_ARATH	DPE2_ARATH
biological_process	GO:0090698	post-embryonic plant morphogenesis	3	10	0.3	0.897203	0.144906	1	1	LSH2_ARATH	LSH7_ARATH	LSH9_ARATH
biological_process	GO:0006108	malate metabolic process	3	27	0.111111	0.608334	0.628187	1	1	MAOP4_ARATH	FUM1_ARATH	FUM2_ARATH
molecular_function	GO:0004708	MAP kinase kinase activity	3	12	0.25	0.956242	0.160229	1	1	M2K1_ARATH	M2K2_ARATH	MPS1_ARATH
biological_process	GO:0060918	auxin transport	3	22	0.136364	0.273516	0.812111	1	1	M2K2_ARATH	MPK10_ARATH	F4KGM7_ARATH
cellular_component	GO:0045263	proton-transporting ATP synthase complex, coupling factor F(o)	3	16	0.1875	0.698503	0.538172	1	1	ATP61_ARATH	Q42139_ARATH	A0A178U7J2_ARATH
cellular_component	GO:0000307	cyclin-dependent protein kinase holoenzyme complex	3	57	0.0526316	0.165292	0.92562	1	1	Q9FKV9_ARATH	Q9LNN0_ARATH	F4I854_ARATH
biological_process	GO:0051289	protein homotetramerization	3	9	0.333333	0.985422	0.0785709	1	1	MGL_ARATH	AARE_ARATH	MYC2_ARATH
cellular_component	GO:0071004	U2-type prespliceosome	3	29	0.103448	0.592829	0.641607	1	1	PR39B_ARATH	PR40A_ARATH	PR40B_ARATH
molecular_function	GO:0016985	mannan endo-1,4-beta-mannosidase activity	3	18	0.166667	0.845825	0.357844	1	1	Q9LTM8_ARATH	A0A1I9LMY2_ARATH	A0A1I9LMY1_ARATH
cellular_component	GO:0000792	heterochromatin	3	12	0.25	0.938282	0.198983	1	1	NRPD2_ARATH	AGDP1_ARATH	EDM2_ARATH
biological_process	GO:0045995	regulation of embryonic development	3	12	0.25	0.910559	0.253599	1	1	LUH_ARATH	SYGM2_ARATH	LEUNG_ARATH
biological_process	GO:0009850	auxin metabolic process	3	12	0.25	0.394191	0.729724	1	1	ARFC_ARATH	RGLG2_ARATH	AGO1_ARATH
molecular_function	GO:0004491	methylmalonate-semialdehyde dehydrogenase (acylating) activity	3	3	1	1	0.00163482	1	0.706	MMSA_ARATH	A8MQR6_ARATH	A8MQH4_ARATH
biological_process	GO:0006491	N-glycan processing	3	10	0.3	0.977928	0.102785	1	1	MNS2_ARATH	PSL5_ARATH	MGAT1_ARATH
biological_process	GO:0016126	sterol biosynthetic process	3	54	0.0555556	0.0859895	0.97005	1	1	HMDH1_ARATH	PMK_ARATH	HMDH2_ARATH
cellular_component	GO:0000776	kinetochore	3	18	0.166667	0.890254	0.237403	1	1	MPS1_ARATH	HTR12_ARATH	KN14C_ARATH
molecular_function	GO:0016616	oxidoreductase activity, acting on the CH-OH group of donors, NAD or NADP as acceptor	3	54	0.0555556	0.000161681	0.999946	0.023	1	CADH2_ARATH	GLYR2_ARATH	CADH3_ARATH
molecular_function	GO:0004001	adenosine kinase activity	3	3	1	1	0.00163482	1	0.706	ADK2_ARATH	ADK1_ARATH	A0A1P8BAP0_ARATH
biological_process	GO:0044209	AMP salvage	3	11	0.272727	0.968475	0.129507	1	1	ADK2_ARATH	ADK1_ARATH	A0A1P8BAP0_ARATH
biological_process	GO:0010047	fruit dehiscence	3	11	0.272727	0.968475	0.129507	1	1	NAC12_ARATH	NAC43_ARATH	Q9M035_ARATH
molecular_function	GO:0005200	structural constituent of cytoskeleton	3	32	0.09375	0.469393	0.74461	1	1	TBG2_ARATH	TBG1_ARATH	ARP8_ARATH
biological_process	GO:0010048	vernalization response	3	16	0.1875	0.923831	0.20059	1	1	VIP4_ARATH	VIN3_ARATH	A0A1R7T397_ARATH
biological_process	GO:0016973	poly(A)+ mRNA export from nucleus	3	14	0.214286	0.927983	0.220768	1	1	NUP1_ARATH	NU133_ARATH	NUA_ARATH
biological_process	GO:0010256	endomembrane system organization	3	18	0.166667	0.995443	0.009011	1	1	FAB1A_ARATH	FAB1B_ARATH	DMP3_ARATH
biological_process	GO:0043068	positive regulation of programmed cell death	3	15	0.2	0.893364	0.253059	1	1	CPSF_ARATH	E2FC_ARATH	MYB65_ARATH
molecular_function	GO:0004521	endoribonuclease activity	3	30	0.1	0.535923	0.563719	1	1	CPSF_ARATH	AGO1_ARATH	ENDO2_ARATH
molecular_function	GO:0004176	ATP-dependent peptidase activity	3	50	0.06	0.144163	0.944229	1	1	FTSH5_ARATH	CLPP4_ARATH	FTSH1_ARATH
molecular_function	GO:0003910	DNA ligase (ATP) activity	3	6	0.5	0.99763	0.0248242	1	1	DNLI1_ARATH	DNLI4_ARATH	A0A1P8BHE2_ARATH
biological_process	GO:0071897	DNA biosynthetic process	3	7	0.428571	0.998025	0.00624933	1	1	DNLI1_ARATH	DNLI4_ARATH	A0A1P8BG35_ARATH
biological_process	GO:0015074	DNA integration	3	5	0.6	0.999147	0.0133906	1	1	POLR2_ARATH	VIP2_ARATH	POLR1_ARATH
molecular_function	GO:0052658	inositol-1,4,5-trisphosphate 5-phosphatase activity	3	7	0.428571	0.994986	0.0396819	1	1	IP5PC_ARATH	IP5PE_ARATH	F4IRT2_ARATH
molecular_function	GO:0004439	phosphatidylinositol-4,5-bisphosphate 5-phosphatase activity	3	18	0.166667	0.845825	0.357844	1	1	IP5PC_ARATH	IP5PE_ARATH	F4IRT2_ARATH
molecular_function	GO:0017116	single-stranded DNA helicase activity	3	4	0.75	0.999808	0.00596189	1	0.991	JHS1_ARATH	A0A1P8ASU0_ARATH	F4HXR5_ARATH
biological_process	GO:0033567	DNA replication, Okazaki fragment processing	3	3	1	1	0.00160827	1	0.873	JHS1_ARATH	A0A1P8ASU0_ARATH	F4HXR5_ARATH
biological_process	GO:0010508	positive regulation of autophagy	3	6	0.5	0.985422	0.0785709	1	1	WRK33_ARATH	BAG6_ARATH	AT18A_ARATH
biological_process	GO:0080175	phragmoplast microtubule organization	3	4	0.75	0.999623	0.00491355	1	0.996	KN12A_ARATH	KN12B_ARATH	KN12D_ARATH
cellular_component	GO:0072686	mitotic spindle	3	21	0.142857	0.750315	0.480474	1	1	ESP1_ARATH	TPX2_ARATH	F4K9U0_ARATH
cellular_component	GO:0017119	Golgi transport complex	3	20	0.15	0.823491	0.388219	1	1	VSR1_ARATH	VSR6_ARATH	F4KCR8_ARATH
biological_process	GO:0031408	oxylipin biosynthetic process	3	25	0.12	0.664216	0.574428	1	1	LOX4_ARATH	LOX3_ARATH	LOX6_ARATH
molecular_function	GO:0042910	xenobiotic transmembrane transporter activity	3	85	0.0352941	0.0051498	0.998583	0.61	1	DTX34_ARATH	DTX44_ARATH	DTX31_ARATH
biological_process	GO:0006473	protein acetylation	3	5	0.6	0.99607	0.00882913	1	1	HAC5_ARATH	HAC12_ARATH	F4IDH2_ARATH
biological_process	GO:1900036	positive regulation of cellular response to heat	3	6	0.5	0.997679	0.0244598	1	1	ISW2_ARATH	BRM_ARATH	CHR17_ARATH
biological_process	GO:2000762	regulation of phenylpropanoid metabolic process	3	15	0.2	0.796748	0.391666	1	1	FBK30_ARATH	MD33A_ARATH	SKI20_ARATH
biological_process	GO:0007155	cell adhesion	3	9	0.333333	0.986283	0.0511585	1	1	GNOM_ARATH	Q67ZD0_ARATH	F4K306_ARATH
biological_process	GO:0016998	cell wall macromolecule catabolic process	3	22	0.136364	0.27614	0.874255	1	1	CHI59_ARATH	CHI5_ARATH	CHI58_ARATH
molecular_function	GO:0005227	calcium activated cation channel activity	3	29	0.103448	0.548905	0.68076	1	1	CSC1_ARATH	CSCLA_ARATH	A0A1P8ATL6_ARATH
biological_process	GO:0006116	NADH oxidation	3	13	0.230769	0.927983	0.220768	1	1	NDB2_ARATH	NDB4_ARATH	F4JGL5_ARATH
biological_process	GO:0006607	NLS-bearing protein import into nucleus	3	13	0.230769	0.94349	0.188893	1	1	IMPA4_ARATH	IMPA7_ARATH	IMPA6_ARATH
biological_process	GO:0071260	cellular response to mechanical stimulus	3	3	1	1	0.00160827	1	0.873	GLR34_ARATH	MCAC1_ARATH	Y5586_ARATH
biological_process	GO:0070370	cellular heat acclimation	3	11	0.272727	0.968475	0.129507	1	1	XRN4_ARATH	WRK33_ARATH	WRK25_ARATH
biological_process	GO:0090436	leaf pavement cell development	3	6	0.5	0.997679	0.0244598	1	1	IQD5_ARATH	MYO5_ARATH	EDM2_ARATH
biological_process	GO:0010216	maintenance of DNA methylation	3	13	0.230769	0.94349	0.188893	1	1	DCL2_ARATH	DCL3_ARATH	DML3_ARATH
biological_process	GO:0071577	zinc ion transmembrane transport	3	22	0.136364	0.719726	0.516055	1	1	ZIP11_ARATH	ZIP4_ARATH	IRT3_ARATH
biological_process	GO:0043086	negative regulation of catalytic activity	3	40	0.075	0.397665	0.740991	1	1	Q2V441_ARATH	Q9FHN2_ARATH	Q9LJX2_ARATH
molecular_function	GO:0000987	cis-regulatory region sequence-specific DNA binding	3	24	0.125	0.999592	0.000718176	1	0.293	TCP20_ARATH	ICE1_ARATH	Q84TG2_ARATH
biological_process	GO:0010030	positive regulation of seed germination	3	21	0.142857	0.773564	0.453631	1	1	ARS1_ARATH	DOF25_ARATH	F4JJ27_ARATH
biological_process	GO:0006346	DNA methylation-dependent heterochromatin assembly	3	8	0.375	0.968475	0.129507	1	1	DDM1_ARATH	SAHH1_ARATH	AGDP1_ARATH
biological_process	GO:0006571	tyrosine biosynthetic process	3	7	0.428571	0.995086	0.0391195	1	1	TYRA1_ARATH	A0A1P8BET1_ARATH	A0A1P8BET3_ARATH
molecular_function	GO:0003747	translation release factor activity	3	13	0.230769	0.868488	0.323899	1	1	ERF1X_ARATH	ERF1Y_ARATH	ERF1Z_ARATH
molecular_function	GO:0016149	translation release factor activity, codon specific	3	8	0.375	0.990904	0.0580334	1	1	ERF1X_ARATH	ERF1Y_ARATH	ERF1Z_ARATH
biological_process	GO:0006415	translational termination	3	13	0.230769	0.79941	0.421175	1	1	ERF1X_ARATH	ERF1Y_ARATH	ERF1Z_ARATH
biological_process	GO:0071249	cellular response to nitrate	3	11	0.272727	0.968475	0.129507	1	1	NRG2_ARATH	NRT26_ARATH	NRT23_ARATH
cellular_component	GO:0010168	ER body	3	12	0.25	0.96349	0.141562	1	1	MEB1_ARATH	Y4554_ARATH	Q0IGM5_ARATH
biological_process	GO:0006353	DNA-templated transcription, termination	3	58	0.0517241	0.0810248	0.968197	1	1	RHON1_ARATH	A0A1P8AM09_ARATH	A0A1P8AM12_ARATH
cellular_component	GO:0030125	clathrin vesicle coat	3	11	0.272727	0.750315	0.480474	1	1	EPN2_ARATH	EPN3_ARATH	CLC3_ARATH
cellular_component	GO:0000159	protein phosphatase type 2A complex	3	29	0.103448	0.592829	0.641607	1	1	2AAA_ARATH	2AAB_ARATH	2AAG_ARATH
biological_process	GO:0031930	mitochondria-nucleus signaling pathway	3	12	0.25	0.956999	0.158343	1	1	PPR47_ARATH	MYB29_ARATH	ABI3_ARATH
molecular_function	GO:0016165	linoleate 13S-lipoxygenase activity	3	4	0.75	0.999808	0.00596189	1	0.991	LOX4_ARATH	LOX3_ARATH	LOX6_ARATH
molecular_function	GO:0016702	oxidoreductase activity, acting on single donors with incorporation of molecular oxygen, incorporation of two atoms of oxygen	3	14	0.214286	0.495303	0.682087	1	1	LOX4_ARATH	LOX3_ARATH	LOX6_ARATH
biological_process	GO:0034440	lipid oxidation	3	7	0.428571	0.904372	0.172089	1	1	LOX4_ARATH	LOX3_ARATH	LOX6_ARATH
biological_process	GO:2000024	regulation of leaf development	3	15	0.2	0.989573	0.0367023	1	1	LUH_ARATH	LEUNG_ARATH	EDM2_ARATH
biological_process	GO:0000281	mitotic cytokinesis	3	3	1	0.971427	0.0698869	1	1	KN5A_ARATH	KN12C_ARATH	KN12D_ARATH
molecular_function	GO:0000014	single-stranded DNA endodeoxyribonuclease activity	3	10	0.3	0.977515	0.104107	1	1	MRE11_ARATH	XPF_ARATH	ENDO2_ARATH
biological_process	GO:0010608	posttranscriptional regulation of gene expression	3	26	0.115385	1	1.55921e-08	1	0	PUM3_ARATH	PUM5_ARATH	PUM6_ARATH
cellular_component	GO:0045252	oxoglutarate dehydrogenase complex	3	6	0.5	0.998086	0.0213019	1	1	ODO2B_ARATH	Q9FLH2_ARATH	F4IWV2_ARATH
biological_process	GO:0033512	L-lysine catabolic process to acetyl-CoA via saccharopine	3	4	0.75	0.999812	0.00586821	1	1	ODO2B_ARATH	AASS_ARATH	F4JVY8_ARATH
molecular_function	GO:0016760	cellulose synthase (UDP-forming) activity	3	39	0.0769231	0.309839	0.854035	1	1	CESA8_ARATH	CSLD1_ARATH	CESA1_ARATH
biological_process	GO:0009833	plant-type primary cell wall biogenesis	3	28	0.107143	0.58061	0.653243	1	1	CESA8_ARATH	CSLD1_ARATH	CESA1_ARATH
biological_process	GO:0032446	protein modification by small protein conjugation	3	11	0.272727	0.267158	0.770766	1	1	ATG7_ARATH	SAE2_ARATH	AXL1_ARATH
molecular_function	GO:0005216	ion channel activity	3	23	0.130435	0.270736	0.794562	1	1	OEP37_ARATH	F4II92_ARATH	F4II93_ARATH
biological_process	GO:0106167	extracellular ATP signaling	3	8	0.375	0.991081	0.0572398	1	1	MYC2_ARATH	MYC3_ARATH	CMTA3_ARATH
molecular_function	GO:0005319	lipid transporter activity	3	20	0.15	0.853651	0.237493	1	1	LTG15_ARATH	AB5A_ARATH	F4I9G5_ARATH
biological_process	GO:0080117	secondary growth	3	4	0.75	0.997679	0.0244598	1	1	CKI1_ARATH	AHK3_ARATH	AHK2_ARATH
cellular_component	GO:0034399	nuclear periphery	3	9	0.333333	0.998747	0.00597495	1	0.807	CRWN4_ARATH	NUP1_ARATH	SAC3B_ARATH
biological_process	GO:1902066	regulation of cell wall pectin metabolic process	3	5	0.6	0.999147	0.0133906	1	1	MED16_ARATH	LUH_ARATH	DOF57_ARATH
biological_process	GO:0006282	regulation of DNA repair	3	15	0.2	0.961156	0.101705	1	1	MORC6_ARATH	PARG1_ARATH	F4J7B7_ARATH
molecular_function	GO:0008878	glucose-1-phosphate adenylyltransferase activity	3	7	0.428571	0.994986	0.0396819	1	1	GLGL1_ARATH	GLGL2_ARATH	GLGS_ARATH
biological_process	GO:0010106	cellular response to iron ion starvation	3	8	0.375	0.991081	0.0572398	1	1	BH047_ARATH	S40A2_ARATH	BTSL1_ARATH
cellular_component	GO:0090575	RNA polymerase II transcription regulator complex	3	22	0.136364	0.958286	0.07002	1	1	E2FB_ARATH	E2FC_ARATH	E2FE_ARATH
biological_process	GO:0051205	protein insertion into membrane	3	8	0.375	0.689987	0.478026	1	1	ALB4_ARATH	OXA1_ARATH	ALB33_ARATH
biological_process	GO:1902183	regulation of shoot apical meristem development	3	8	0.375	0.977928	0.102785	1	1	AGO10_ARATH	LUH_ARATH	LEUNG_ARATH
biological_process	GO:0080187	floral organ senescence	3	6	0.5	0.997679	0.0244598	1	1	AGL42_ARATH	SAG12_ARATH	WRK70_ARATH
cellular_component	GO:0030014	CCR4-NOT complex	3	18	0.166667	0.999965	0.000148848	1	0.027	Q9M1E4_ARATH	F4JXH7_ARATH	F4JXH8_ARATH
cellular_component	GO:1990316	Atg1/ULK1 kinase complex	3	4	0.75	0.999846	0.0050633	1	0.775	ATG11_ARATH	AT13A_ARATH	F4IXZ6_ARATH
biological_process	GO:0034727	piecemeal microautophagy of the nucleus	3	6	0.5	0.997679	0.0244598	1	1	ATG11_ARATH	ATG7_ARATH	AT13A_ARATH
biological_process	GO:0006497	protein lipidation	3	6	0.5	0.262538	0.83437	1	1	ATG7_ARATH	AT18D_ARATH	AT18A_ARATH
biological_process	GO:0090567	reproductive shoot system development	3	3	1	0.999994	9.83199e-06	1	0.007	BZP29_ARATH	BZP30_ARATH	B3H7M2_ARATH
molecular_function	GO:0003906	DNA-(apurinic or apyrimidinic site) endonuclease activity	3	10	0.3	0.967903	0.131111	1	1	DME_ARATH	ROS1_ARATH	APE2_ARATH
cellular_component	GO:0018444	translation release factor complex	3	4	0.75	0.999846	0.0050633	1	0.775	ERF1X_ARATH	ERF1Y_ARATH	ERF1Z_ARATH
molecular_function	GO:1990825	sequence-specific mRNA binding	3	7	0.428571	0.994986	0.0396819	1	1	ERF1X_ARATH	ERF1Y_ARATH	ERF1Z_ARATH
biological_process	GO:0002184	cytoplasmic translational termination	3	4	0.75	0.999812	0.00586821	1	1	ERF1X_ARATH	ERF1Y_ARATH	ERF1Z_ARATH
molecular_function	GO:0019888	protein phosphatase regulator activity	3	38	0.0789474	0.11333	0.952788	1	1	2AAA_ARATH	2AAB_ARATH	2AAG_ARATH
biological_process	GO:0016197	endosomal transport	3	12	0.25	0.999999	4.25784e-06	1	0.005	EHD1_ARATH	Q9LM78_ARATH	F4HY32_ARATH
molecular_function	GO:0004605	phosphatidate cytidylyltransferase activity	3	11	0.272727	0.967903	0.131111	1	1	CDS2_ARATH	F4JL60_ARATH	F4JL62_ARATH
biological_process	GO:0032886	regulation of microtubule-based process	3	3	1	0.999571	0.00156152	1	0.792	KINUA_ARATH	A0A1I9LP88_ARATH	F4IC87_ARATH
cellular_component	GO:0045239	tricarboxylic acid cycle enzyme complex	3	4	0.75	0.997793	0.0107863	1	0.922	FUM1_ARATH	FUM2_ARATH	A0A1P8BDR1_ARATH
molecular_function	GO:0004333	fumarate hydratase activity	3	4	0.75	0.999808	0.00596189	1	0.991	FUM1_ARATH	FUM2_ARATH	A0A1P8BDR1_ARATH
biological_process	GO:0006106	fumarate metabolic process	3	4	0.75	0.999812	0.00586821	1	1	FUM1_ARATH	FUM2_ARATH	A0A1P8BDR1_ARATH
biological_process	GO:0010262	somatic embryogenesis	3	13	0.230769	0.94349	0.188893	1	1	CHI5_ARATH	NFYA5_ARATH	NFYA6_ARATH
cellular_component	GO:0000923	equatorial microtubule organizing center	3	6	0.5	0.998086	0.0213019	1	1	GACP2_ARATH	GACP3_ARATH	GACP4_ARATH
biological_process	GO:0045132	meiotic chromosome segregation	3	4	0.75	0.999975	8.05277e-05	1	0.103	NUF2_ARATH	WAPL1_ARATH	WAPL2_ARATH
biological_process	GO:0007062	sister chromatid cohesion	3	16	0.1875	0.999958	0.000140656	1	0.174	SCC11_ARATH	SMC1_ARATH	MCMBP_ARATH
molecular_function	GO:0008080	N-acetyltransferase activity	3	38	0.0789474	0.990661	0.0195833	1	1	Q9ZV08_ARATH	A0A1I9LNP2_ARATH	A0A1I9LNP0_ARATH
cellular_component	GO:0030870	Mre11 complex	3	4	0.75	0.999846	0.0050633	1	0.775	MRE11_ARATH	NBS1_ARATH	A0A1P8BB63_ARATH
cellular_component	GO:0001401	SAM complex	3	9	0.333333	0.987799	0.0693524	1	1	OEP80_ARATH	Q9FFG3_ARATH	Q9SRL6_ARATH
biological_process	GO:0000380	alternative mRNA splicing, via spliceosome	3	14	0.214286	0.909258	0.226436	1	1	PRP8A_ARATH	SAC3A_ARATH	Q67ZZ1_ARATH
biological_process	GO:1901703	protein localization involved in auxin polar transport	3	14	0.214286	0.927983	0.220768	1	1	WRK23_ARATH	ALA5_ARATH	F4KGM7_ARATH
cellular_component	GO:0016514	SWI/SNF complex	3	13	0.230769	0.951794	0.169569	1	1	PIE1_ARATH	Q147F4_ARATH	Q8VY17_ARATH
biological_process	GO:0043486	histone exchange	3	8	0.375	0.94349	0.188893	1	1	PIE1_ARATH	F4IKF3_ARATH	Q9T073_ARATH
molecular_function	GO:0030619	U1 snRNA binding	3	6	0.5	0.99763	0.0248242	1	1	COIL_ARATH	PRP8A_ARATH	PRP8B_ARATH
molecular_function	GO:0071916	dipeptide transmembrane transporter activity	3	19	0.157895	0.821832	0.391534	1	1	PTR1_ARATH	PTR5_ARATH	PTR2_ARATH
molecular_function	GO:0042937	tripeptide transmembrane transporter activity	3	19	0.157895	0.821832	0.391534	1	1	PTR1_ARATH	PTR5_ARATH	PTR2_ARATH
biological_process	GO:0071217	cellular response to external biotic stimulus	3	3	1	1	0.00160827	1	0.873	LUH_ARATH	SEUSS_ARATH	LEUNG_ARATH
biological_process	GO:0046898	response to cycloheximide	3	5	0.6	0.999147	0.0133906	1	1	LUH_ARATH	SEUSS_ARATH	LEUNG_ARATH
biological_process	GO:0010272	response to silver ion	3	4	0.75	0.999812	0.00586821	1	1	LUH_ARATH	SEUSS_ARATH	LEUNG_ARATH
biological_process	GO:0010496	intercellular transport	3	7	0.428571	0.989955	0.0322951	1	1	AB40G_ARATH	AB30G_ARATH	AB31G_ARATH
biological_process	GO:0080168	abscisic acid transport	3	6	0.5	0.997679	0.0244598	1	1	AB40G_ARATH	AB30G_ARATH	AB31G_ARATH
biological_process	GO:0034622	protein-containing complex assembly	3	8	0.375	NA	NA	NA	NA	OEP80_ARATH	Q9FFG3_ARATH	Q9SRL6_ARATH
biological_process	GO:0045040	protein insertion into mitochondrial outer membrane	3	16	0.1875	0.891328	0.287044	1	1	OEP80_ARATH	Q9FFG3_ARATH	Q9SRL6_ARATH
biological_process	GO:0030026	cellular manganese ion homeostasis	3	16	0.1875	0.891328	0.287044	1	1	MEB1_ARATH	A0A1P8B7C6_ARATH	A0A1P8B7E1_ARATH
molecular_function	GO:0008251	tRNA-specific adenosine deaminase activity	3	5	0.6	0.999128	0.0135971	1	1	TAD1_ARATH	TAD3_ARATH	TADA_ARATH
molecular_function	GO:0097157	pre-mRNA intronic binding	3	4	0.75	0.999808	0.00596189	1	0.991	PRP8A_ARATH	PRP8B_ARATH	U1165_ARATH
biological_process	GO:0000244	spliceosomal tri-snRNP complex assembly	3	8	0.375	0.991081	0.0572398	1	1	PRP8A_ARATH	PRP8B_ARATH	Q9C711_ARATH
biological_process	GO:1904278	positive regulation of wax biosynthetic process	3	7	0.428571	0.995086	0.0391195	1	1	SKI2_ARATH	SKI3_ARATH	MYB96_ARATH
molecular_function	GO:0036002	pre-mRNA binding	3	4	0.75	0.99875	0.00602714	1	0.992	SKIP_ARATH	C3H25_ARATH	C3H53_ARATH
cellular_component	GO:0030904	retromer complex	3	10	0.3	0.999962	0.000355984	1	0.077	SNX2B_ARATH	VP35B_ARATH	F4HYH6_ARATH
biological_process	GO:0042938	dipeptide transport	3	4	0.75	0.999812	0.00586821	1	1	PTR1_ARATH	PTR5_ARATH	PTR2_ARATH
molecular_function	GO:0008193	tRNA guanylyltransferase activity	3	5	0.6	0.999128	0.0135971	1	1	THG1_ARATH	THG2_ARATH	A0A1P8B2C6_ARATH
biological_process	GO:0035195	gene silencing by miRNA	3	7	0.428571	0.999274	0.00247512	1	0.959	AGO1_ARATH	AGO7_ARATH	F4IXI9_ARATH
cellular_component	GO:0031464	Cul4A-RING E3 ubiquitin ligase complex	3	9	0.333333	0.987799	0.0693524	1	1	TAUE1_ARATH	ACSA1_ARATH	F4HQX6_ARATH
molecular_function	GO:0005274	allantoin:proton symporter activity	3	5	0.6	0.999128	0.0135971	1	1	UPS3_ARATH	UPS1_ARATH	UPS5_ARATH
molecular_function	GO:0015505	uracil:cation symporter activity	3	5	0.6	0.999128	0.0135971	1	1	UPS3_ARATH	UPS1_ARATH	UPS5_ARATH
molecular_function	GO:0102092	5-diphosphoinositol pentakisphosphate 3-kinase activity	3	7	0.428571	0.994986	0.0396819	1	1	VIP1L_ARATH	A0A178VEL3_ARATH	F4J8C7_ARATH
molecular_function	GO:0033857	diphosphoinositol-pentakisphosphate kinase activity	3	7	0.428571	0.994986	0.0396819	1	1	VIP1L_ARATH	A0A178VEL3_ARATH	F4J8C7_ARATH
molecular_function	GO:0000829	inositol heptakisphosphate kinase activity	3	7	0.428571	0.994986	0.0396819	1	1	VIP1L_ARATH	A0A178VEL3_ARATH	F4J8C7_ARATH
molecular_function	GO:0052723	inositol hexakisphosphate 1-kinase activity	3	7	0.428571	0.994986	0.0396819	1	1	VIP1L_ARATH	A0A178VEL3_ARATH	F4J8C7_ARATH
molecular_function	GO:0052724	inositol hexakisphosphate 3-kinase activity	3	7	0.428571	0.994986	0.0396819	1	1	VIP1L_ARATH	A0A178VEL3_ARATH	F4J8C7_ARATH
molecular_function	GO:0000832	inositol hexakisphosphate 5-kinase activity	3	7	0.428571	0.994986	0.0396819	1	1	VIP1L_ARATH	A0A178VEL3_ARATH	F4J8C7_ARATH
molecular_function	GO:0000827	inositol-1,3,4,5,6-pentakisphosphate kinase activity	3	7	0.428571	0.994986	0.0396819	1	1	VIP1L_ARATH	A0A178VEL3_ARATH	F4J8C7_ARATH
biological_process	GO:0045053	protein retention in Golgi apparatus	3	5	0.6	0.999147	0.0133906	1	1	A0A1I9LQ65_ARATH	F4JNE2_ARATH	A0A1P8BEE1_ARATH
biological_process	GO:0070816	phosphorylation of RNA polymerase II C-terminal domain	3	25	0.12	0.796748	0.391666	1	1	Q9FKV9_ARATH	Q9LNN0_ARATH	F4I854_ARATH
molecular_function	GO:0033730	arogenate dehydrogenase (NADP+) activity	3	4	0.75	0.999808	0.00596189	1	0.991	TYRA1_ARATH	A0A1P8BET1_ARATH	A0A1P8BET3_ARATH
molecular_function	GO:0008977	prephenate dehydrogenase (NAD+) activity	3	4	0.75	0.999808	0.00596189	1	0.991	TYRA1_ARATH	A0A1P8BET1_ARATH	A0A1P8BET3_ARATH
molecular_function	GO:0004665	prephenate dehydrogenase (NADP+) activity	3	4	0.75	0.999808	0.00596189	1	0.991	TYRA1_ARATH	A0A1P8BET1_ARATH	A0A1P8BET3_ARATH
biological_process	GO:0006269	DNA replication, synthesis of RNA primer	3	4	0.75	0.999812	0.00586821	1	1	PRI2_ARATH	F4HRU9_ARATH	F4HRU7_ARATH
molecular_function	GO:0016763	pentosyltransferase activity	3	16	0.1875	0.0879091	0.958997	1	1	O22225_ARATH	F4IKY7_ARATH	A0A1P8B095_ARATH
molecular_function	GO:1990269	RNA polymerase II C-terminal domain phosphoserine binding	3	4	0.75	0.999808	0.00596189	1	0.991	VIP5_ARATH	VIP4_ARATH	C3H19_ARATH
biological_process	GO:0071569	protein ufmylation	3	4	0.75	0.999984	0.000377055	1	0.392	F4J7Z8_ARATH	F4J7Z6_ARATH	A0A1I9LTL2_ARATH
molecular_function	GO:0140326	ATPase-coupled intramembrane lipid transporter activity	3	19	0.157895	0.821832	0.391534	1	1	ALA2_ARATH	ALA5_ARATH	F4K8T6_ARATH
molecular_function	GO:0005388	P-type calcium transporter activity	3	19	0.157895	0.821832	0.391534	1	1	ACA9_ARATH	ECA1_ARATH	ECA4_ARATH
biological_process	GO:0045597	positive regulation of cell differentiation	3	3	1	0.991081	0.0572398	1	1	MYB36_ARATH	ATHB8_ARATH	FAMA_ARATH
biological_process	GO:0031573	mitotic intra-S DNA damage checkpoint signaling	3	5	0.6	0.999147	0.0133906	1	1	Q709F6_ARATH	F4JIJ1_ARATH	F4J7B7_ARATH
biological_process	GO:0048581	negative regulation of post-embryonic development	3	4	0.75	0.979067	0.0386082	1	1	AB40G_ARATH	AB30G_ARATH	AB31G_ARATH
molecular_function	GO:0004375	glycine dehydrogenase (decarboxylating) activity	3	3	1	1	0.00163482	1	0.706	GCSP1_ARATH	GCSP2_ARATH	B3H5Y8_ARATH
biological_process	GO:0061157	mRNA destabilization	3	11	0.272727	0.999162	0.00253493	1	0.962	Q1JPL5_ARATH	Q56XH8_ARATH	Q0WR25_ARATH
molecular_function	GO:0035243	protein-arginine omega-N symmetric methyltransferase activity	3	4	0.75	0.999808	0.00596189	1	0.991	Q1JPN1_ARATH	F4J0D4_ARATH	A0A1I9LQL6_ARATH
molecular_function	GO:0016423	tRNA (guanine) methyltransferase activity	3	3	1	0.926792	0.223195	1	1	F4JP86_ARATH	A0A1P8B7Z4_ARATH	A0A1P8B800_ARATH
biological_process	GO:0051276	chromosome organization	2	6	0.333333	1	6.30944e-12	1	0	SCC11_ARATH	AB25B_ARATH
biological_process	GO:0030307	positive regulation of cell growth	2	16	0.125	0.746941	0.485301	1	1	RTOR2_ARATH	SAB_ARATH
biological_process	GO:0000373	Group II intron splicing	2	30	0.0666667	0.300352	0.881796	1	1	RH53_ARATH	CFM2_ARATH
molecular_function	GO:0032050	clathrin heavy chain binding	2	23	0.0869565	0.480135	0.772398	1	1	SCY2B_ARATH	CLC3_ARATH
biological_process	GO:0009142	nucleoside triphosphate biosynthetic process	2	3	0.666667	0.365505	0.766865	1	1	KCY2_ARATH	KAD2_ARATH
biological_process	GO:0019375	galactolipid biosynthetic process	2	10	0.2	0.897215	0.330862	1	1	PAH2_ARATH	PAH1_ARATH
biological_process	GO:0008654	phospholipid biosynthetic process	2	26	0.0769231	0.162307	0.885448	1	1	PAH2_ARATH	PAH1_ARATH
biological_process	GO:0006631	fatty acid metabolic process	2	66	0.030303	0.0123007	0.992961	0.996	1	IBR3_ARATH	ACS_ARATH
biological_process	GO:0009827	plant-type cell wall modification	2	20	0.1	0.377574	0.810378	1	1	LUH_ARATH	BGAL6_ARATH
biological_process	GO:0042744	hydrogen peroxide catabolic process	2	109	0.0183486	8.46745e-05	0.99999	0.031	1	PER61_ARATH	PER12_ARATH
molecular_function	GO:0008124	4-alpha-hydroxytetrahydrobiopterin dehydratase activity	2	4	0.5	0.994038	0.0707898	1	1	ATP1_ARATH	F4KBV0_ARATH
biological_process	GO:0006729	tetrahydrobiopterin biosynthetic process	2	5	0.4	0.986609	0.10789	1	1	ATP1_ARATH	F4KBV0_ARATH
biological_process	GO:0009664	plant-type cell wall organization	2	82	0.0243902	0.434856	0.655229	1	1	ICR5_ARATH	COBL2_ARATH
biological_process	GO:0051707	response to other organism	2	21	0.0952381	0.0961194	0.917538	1	1	RAP23_ARATH	U73C7_ARATH
cellular_component	GO:0010319	stromule	2	38	0.0526316	0.188793	0.935342	1	1	CPNB1_ARATH	ATPA_ARATH
biological_process	GO:0045926	negative regulation of growth	2	11	0.181818	0.9823	0.044708	1	1	AUXI2_ARATH	MYB65_ARATH
biological_process	GO:1900055	regulation of leaf senescence	2	15	0.133333	0.897096	0.194698	1	1	SWTIE_ARATH	TTM1_ARATH
molecular_function	GO:0032266	phosphatidylinositol-3-phosphate binding	2	11	0.181818	0.868889	0.378268	1	1	AT18D_ARATH	AT18A_ARATH
biological_process	GO:0009809	lignin biosynthetic process	2	41	0.0487805	0.108728	0.96036	1	1	CADH2_ARATH	CADH3_ARATH
biological_process	GO:0006874	cellular calcium ion homeostasis	2	17	0.117647	0.738062	0.440597	1	1	ECA1_ARATH	ECA4_ARATH
biological_process	GO:0009306	protein secretion	2	18	0.111111	0.611913	0.670369	1	1	TI236_ARATH	A0A1P8AYW3_ARATH
biological_process	GO:0006625	protein targeting to peroxisome	2	7	0.285714	0.848029	0.354553	1	1	PEX5_ARATH	PEX14_ARATH
biological_process	GO:0051782	negative regulation of cell division	2	9	0.222222	0.921429	0.285246	1	1	E2FC_ARATH	FAMA_ARATH
biological_process	GO:0009920	cell plate formation involved in plant-type cell wall biogenesis	2	8	0.25	0.94276	0.239318	1	1	RGAP6_ARATH	B9DH97_ARATH
biological_process	GO:0000914	phragmoplast assembly	2	4	0.5	0.994132	0.0700901	1	1	RUK_ARATH	TANB_ARATH
cellular_component	GO:0031307	integral component of mitochondrial outer membrane	2	19	0.105263	0.643537	0.64152	1	1	Q9SRL6_ARATH	F4JVD6_ARATH
biological_process	GO:0032544	plastid translation	2	22	0.0909091	0.514699	0.747635	1	1	PPP7I_ARATH	F4JXH7_ARATH
biological_process	GO:0043489	RNA stabilization	2	5	0.4	0.985422	0.0785709	1	1	CP29A_ARATH	F4JAF3_ARATH
biological_process	GO:0042753	positive regulation of circadian rhythm	2	12	0.166667	0.841657	0.41906	1	1	FHY3_ARATH	FAR1_ARATH
biological_process	GO:0006071	glycerol metabolic process	2	29	0.0689655	0.174983	0.941462	1	1	GPDL4_ARATH	GPDL3_ARATH
molecular_function	GO:0030976	thiamine pyrophosphate binding	2	10	0.2	0.895893	0.333331	1	1	Q9FLH2_ARATH	F4IWV2_ARATH
biological_process	GO:2000012	regulation of auxin polar transport	2	34	0.0588235	0.222014	0.920605	1	1	AGL62_ARATH	BIG5_ARATH
biological_process	GO:0048497	maintenance of floral organ identity	2	7	0.285714	0.96088	0.193799	1	1	PDF2_ARATH	HUA2_ARATH
biological_process	GO:0006995	cellular response to nitrogen starvation	2	41	0.0487805	0.125745	0.961283	1	1	ATG7_ARATH	BECN1_ARATH
biological_process	GO:0090548	response to nitrate starvation	2	10	0.2	0.897215	0.330862	1	1	HHO1_ARATH	ASHH2_ARATH
biological_process	GO:0010205	photoinhibition	2	11	0.181818	0.870493	0.375607	1	1	PDI12_ARATH	FTSH5_ARATH
molecular_function	GO:0031516	far-red light photoreceptor activity	2	2	1	1	0.0138818	1	1	PHYA_ARATH	PHYB_ARATH
molecular_function	GO:0009883	red or far-red light photoreceptor activity	2	2	1	1	0.0138818	1	1	PHYA_ARATH	PHYB_ARATH
biological_process	GO:0017148	negative regulation of translation	2	21	0.0952381	0.996563	0.00802973	1	1	PHYA_ARATH	DCP5L_ARATH
biological_process	GO:0009649	entrainment of circadian clock	2	12	0.166667	0.645447	0.640655	1	1	PHYB_ARATH	BZP63_ARATH
molecular_function	GO:0008970	phospholipase A1 activity	2	20	0.1	0.575249	0.701022	1	1	PLA12_ARATH	SHGR2_ARATH
cellular_component	GO:0032580	Golgi cisterna membrane	2	40	0.05	0.161991	0.946741	1	1	FUT8_ARATH	ARAE4_ARATH
biological_process	GO:0050829	defense response to Gram-negative bacterium	2	22	0.0909091	0.514699	0.747635	1	1	R13L4_ARATH	RLK5_ARATH
biological_process	GO:0016226	iron-sulfur cluster assembly	2	36	0.0555556	0.148593	0.952349	1	1	HF101_ARATH	AB7I_ARATH
biological_process	GO:0000302	response to reactive oxygen species	2	35	0.0571429	0.316655	0.769003	1	1	WRK70_ARATH	AB39G_ARATH
molecular_function	GO:0070181	small ribosomal subunit rRNA binding	2	14	0.142857	0.776805	0.503952	1	1	RR20_ARATH	RR6_ARATH
biological_process	GO:0000387	spliceosomal snRNP assembly	2	23	0.0869565	0.852003	0.295075	1	1	COIL_ARATH	ICLN_ARATH
biological_process	GO:0034728	nucleosome organization	2	4	0.5	0.99197	0.0175467	1	1	ISW2_ARATH	UBN1_ARATH
biological_process	GO:0006368	transcription elongation from RNA polymerase II promoter	2	17	0.117647	0.58688	0.599134	1	1	VIP4_ARATH	F4K204_ARATH
biological_process	GO:0005985	sucrose metabolic process	2	31	0.0645161	0.0623045	0.979524	1	1	SUS5_ARATH	A0A2H1ZE74_ARATH
cellular_component	GO:0048471	perinuclear region of cytoplasm	2	32	0.0625	0.272439	0.895918	1	1	P4KA1_ARATH	RGGC_ARATH
cellular_component	GO:0005741	mitochondrial outer membrane	2	34	0.0588235	0.310073	0.816808	1	1	TTM1_ARATH	A0A2H1ZE94_ARATH
molecular_function	GO:0070403	NAD+ binding	2	24	0.0833333	0.45037	0.792649	1	1	MFP2_ARATH	SIR1_ARATH
biological_process	GO:0032922	circadian regulation of gene expression	2	11	0.181818	0.870493	0.375607	1	1	NU205_ARATH	MED16_ARATH
biological_process	GO:0009832	plant-type cell wall biogenesis	2	28	0.0714286	0.974979	0.0394246	1	1	COBL2_ARATH	F4KGM7_ARATH
molecular_function	GO:0005338	nucleotide-sugar transmembrane transporter activity	2	17	0.117647	0.25539	0.904711	1	1	UXT2_ARATH	UXT3_ARATH
molecular_function	GO:0005464	UDP-xylose transmembrane transporter activity	2	5	0.4	0.986403	0.108918	1	1	UXT2_ARATH	UXT3_ARATH
biological_process	GO:0015790	UDP-xylose transmembrane transport	2	3	0.666667	0.998392	0.0379791	1	1	UXT2_ARATH	UXT3_ARATH
biological_process	GO:0006048	UDP-N-acetylglucosamine biosynthetic process	2	12	0.166667	0.841657	0.41906	1	1	UGPA3_ARATH	GFAT1_ARATH
biological_process	GO:0045814	negative regulation of gene expression, epigenetic	2	9	0.222222	0.921429	0.285246	1	1	MOM1_ARATH	VIN3_ARATH
biological_process	GO:0010304	PSII associated light-harvesting complex II catabolic process	2	8	0.25	0.94276	0.239318	1	1	FTSH5_ARATH	FTSH1_ARATH
cellular_component	GO:0031305	integral component of mitochondrial inner membrane	2	31	0.0645161	0.188793	0.935342	1	1	OXA1_ARATH	ALB33_ARATH
biological_process	GO:0051026	chiasma assembly	2	13	0.153846	0.811107	0.460909	1	1	ASY1_ARATH	F4HU48_ARATH
cellular_component	GO:0032588	trans-Golgi network membrane	2	23	0.0869565	0.519526	0.743416	1	1	SCY2B_ARATH	BIG4_ARATH
biological_process	GO:0045787	positive regulation of cell cycle	2	5	0.4	0.938811	0.13548	1	1	FAS1_ARATH	THG1_ARATH
molecular_function	GO:0036456	L-methionine-(S)-S-oxide reductase activity	2	5	0.4	0.986403	0.108918	1	1	MSRA1_ARATH	MSRA3_ARATH
biological_process	GO:0019674	NAD metabolic process	2	8	0.25	0.963298	0.106636	1	1	NADK2_ARATH	F4HY34_ARATH
biological_process	GO:0006741	NADP biosynthetic process	2	9	0.222222	0.921429	0.285246	1	1	NADK2_ARATH	F4HY34_ARATH
cellular_component	GO:0005665	RNA polymerase II, core complex	2	24	0.0833333	0.490229	0.764656	1	1	RPD2B_ARATH	NRPD2_ARATH
molecular_function	GO:0031369	translation initiation factor binding	2	17	0.117647	0.608466	0.673395	1	1	O49733_ARATH	F4J1N5_ARATH
biological_process	GO:0006367	transcription initiation from RNA polymerase II promoter	2	29	0.0689655	0.510977	0.654465	1	1	TAF4B_ARATH	TAF2_ARATH
cellular_component	GO:0031234	extrinsic component of cytoplasmic side of plasma membrane	2	18	0.111111	0.461828	0.784351	1	1	NPG1_ARATH	P4KA1_ARATH
biological_process	GO:0001708	cell fate specification	2	14	0.142857	0.783737	0.369318	1	1	NOV_ARATH	SEP3_ARATH
biological_process	GO:0009819	drought recovery	2	12	0.166667	0.841657	0.41906	1	1	PUM5_ARATH	MYB29_ARATH
biological_process	GO:0080037	negative regulation of cytokinin-activated signaling pathway	2	6	0.333333	0.97554	0.149605	1	1	FBK30_ARATH	SKI20_ARATH
molecular_function	GO:0003730	mRNA 3'-UTR binding	2	13	0.153846	0.909126	0.256275	1	1	PABP1_ARATH	PABP5_ARATH
biological_process	GO:1905614	negative regulation of developmental vegetative growth	2	3	0.666667	0.998392	0.0379791	1	1	GAI_ARATH	RGA_ARATH
molecular_function	GO:0016174	NAD(P)H oxidase H2O2-forming activity	2	11	0.181818	0.868889	0.378268	1	1	RBOHF_ARATH	RBOHI_ARATH
biological_process	GO:0010053	root epidermal cell differentiation	2	21	0.0952381	0.908935	0.136847	1	1	GPDL3_ARATH	HDA18_ARATH
biological_process	GO:0043069	negative regulation of programmed cell death	2	11	0.181818	0.992139	0.0265266	1	1	RBOHF_ARATH	LSD1_ARATH
biological_process	GO:0007231	osmosensory signaling pathway	2	5	0.4	0.986609	0.10789	1	1	RBOHF_ARATH	MCAC1_ARATH
biological_process	GO:0050821	protein stabilization	2	32	0.0625	0.258832	0.903	1	1	LEA7_ARATH	CLASP_ARATH
biological_process	GO:0046907	intracellular transport	2	11	0.181818	0.999997	5.15659e-06	1	0.005	AMSH3_ARATH	Q93ZH3_ARATH
biological_process	GO:0050790	regulation of catalytic activity	2	22	0.0909091	0.148212	0.893419	1	1	PV42B_ARATH	AB25B_ARATH
biological_process	GO:0050776	regulation of immune response	2	4	0.5	0.658809	0.420241	1	1	R13L4_ARATH	NRPD2_ARATH
biological_process	GO:0048579	negative regulation of long-day photoperiodism, flowering	2	13	0.153846	0.811107	0.460909	1	1	PEP_ARATH	ELF6_ARATH
biological_process	GO:0048577	negative regulation of short-day photoperiodism, flowering	2	6	0.333333	0.97554	0.149605	1	1	PEP_ARATH	ELF6_ARATH
molecular_function	GO:0035197	siRNA binding	2	8	0.25	0.941967	0.241294	1	1	AGO2_ARATH	AGO9_ARATH
biological_process	GO:1900864	mitochondrial RNA modification	2	6	0.333333	0.816747	0.343383	1	1	MORF1_ARATH	PP104_ARATH
biological_process	GO:2001009	regulation of plant-type cell wall cellulose biosynthetic process	2	6	0.333333	0.97554	0.149605	1	1	MED16_ARATH	STL1_ARATH
biological_process	GO:0030833	regulation of actin filament polymerization	2	19	0.105263	0.99172	0.0204839	1	1	PIR_ARATH	B3H6L9_ARATH
cellular_component	GO:0019005	SCF ubiquitin ligase complex	2	83	0.0240964	0.00354885	0.999378	0.256	1	FBK30_ARATH	Q8H1Q4_ARATH
biological_process	GO:0048544	recognition of pollen	2	88	0.0227273	1.43936e-05	0.999997	0.003	1	SD31_ARATH	Y1661_ARATH
biological_process	GO:0009958	positive gravitropism	2	35	0.0571429	0.205285	0.928235	1	1	PKS1_ARATH	AB1B_ARATH
cellular_component	GO:0009543	chloroplast thylakoid lumen	2	47	0.0425532	0.0925301	0.973334	1	1	TL15A_ARATH	TL1Y_ARATH
biological_process	GO:0071472	cellular response to salt stress	2	36	0.0555556	0.148593	0.952349	1	1	RAP24_ARATH	NAC40_ARATH
biological_process	GO:0045595	regulation of cell differentiation	2	23	0.0869565	0.992827	0.0174137	1	1	RAP24_ARATH	BAME3_ARATH
biological_process	GO:0048571	long-day photoperiodism	2	5	0.4	0.875006	0.226801	1	1	RENT1_ARATH	RENT3_ARATH
biological_process	GO:0010182	sugar mediated signaling pathway	2	33	0.0606061	0.27614	0.874255	1	1	RENT1_ARATH	DOG1_ARATH
cellular_component	GO:0016324	apical plasma membrane	2	24	0.0833333	0.490229	0.764656	1	1	Y2214_ARATH	F4JLB7_ARATH
biological_process	GO:1901000	regulation of response to salt stress	2	11	0.181818	0.938811	0.13548	1	1	CMKMT_ARATH	EMF1_ARATH
cellular_component	GO:0032586	protein storage vacuole membrane	2	9	0.222222	0.930648	0.264819	1	1	RMR4_ARATH	PAH1_ARATH
biological_process	GO:0009942	longitudinal axis specification	2	9	0.222222	0.921429	0.285246	1	1	GNOM_ARATH	ARFE_ARATH
cellular_component	GO:0046695	SLIK (SAGA-like) complex	2	7	0.285714	0.965776	0.178612	1	1	TAF12_ARATH	TA12B_ARATH
biological_process	GO:0010118	stomatal movement	2	33	0.0606061	0.632719	0.46079	1	1	SYP22_ARATH	DOF57_ARATH
biological_process	GO:0048193	Golgi vesicle transport	2	15	0.133333	0.99978	0.000435241	1	0.416	GRIP_ARATH	VPS51_ARATH
biological_process	GO:0060771	phyllotactic patterning	2	4	0.5	0.97554	0.149605	1	1	AIL7_ARATH	F4KGW7_ARATH
molecular_function	GO:0015095	magnesium ion transmembrane transporter activity	2	32	0.0625	0.25539	0.904711	1	1	PAM71_ARATH	NIPA6_ARATH
biological_process	GO:0033388	putrescine biosynthetic process from arginine	2	4	0.5	0.97554	0.149605	1	1	SPE1_ARATH	SPE2_ARATH
molecular_function	GO:0000175	3'-5'-exoribonuclease activity	2	33	0.0606061	0.0799099	0.977741	1	1	PARNL_ARATH	CCR4E_ARATH
biological_process	GO:0010014	meristem initiation	2	10	0.2	0.656617	0.551358	1	1	XPOT_ARATH	ATHB8_ARATH
biological_process	GO:0009944	polarity specification of adaxial/abaxial axis	2	23	0.0869565	0.483945	0.76969	1	1	LUH_ARATH	LEUNG_ARATH
molecular_function	GO:0051538	3 iron, 4 sulfur cluster binding	2	9	0.222222	0.920379	0.287486	1	1	GLTB2_ARATH	GLTB1_ARATH
molecular_function	GO:0009055	electron transfer activity	2	91	0.021978	1.259e-05	0.999998	0.001	1	FDC2_ARATH	F4IE99_ARATH
biological_process	GO:1900424	regulation of defense response to bacterium	2	9	0.222222	0.704142	0.449612	1	1	M3K3A_ARATH	BIK1_ARATH
biological_process	GO:0051127	positive regulation of actin nucleation	2	4	0.5	0.999147	0.0133906	1	1	SCAR4_ARATH	SCAR2_ARATH
biological_process	GO:0090351	seedling development	2	30	0.0666667	0.746728	0.326267	1	1	SURFL_ARATH	SNX2B_ARATH
biological_process	GO:0009957	epidermal cell fate specification	2	6	0.333333	0.97554	0.149605	1	1	WRK44_ARATH	F4HQC0_ARATH
cellular_component	GO:0000118	histone deacetylase complex	2	32	0.0625	0.354872	0.825047	1	1	SNL4_ARATH	Q9C9Q1_ARATH
biological_process	GO:0016102	diterpenoid biosynthetic process	2	40	0.05	0.0476709	0.982801	1	1	TPS05_ARATH	A0A1P8B0J1_ARATH
biological_process	GO:0007112	male meiosis cytokinesis	2	6	0.333333	0.97554	0.149605	1	1	KN12A_ARATH	KN12B_ARATH
biological_process	GO:0006833	water transport	2	12	0.166667	0.79941	0.421175	1	1	GSO1_ARATH	Q9LRY7_ARATH
biological_process	GO:0030104	water homeostasis	2	9	0.222222	0.927983	0.220768	1	1	GSO1_ARATH	RZF1_ARATH
molecular_function	GO:0008320	protein transmembrane transporter activity	2	28	0.0714286	0.20714	0.912714	1	1	SCY2_ARATH	TI100_ARATH
biological_process	GO:0045036	protein targeting to chloroplast	2	21	0.0952381	0.773199	0.36955	1	1	TC120_ARATH	TOC90_ARATH
molecular_function	GO:0004620	phospholipase activity	2	23	0.0869565	0.463344	0.669799	1	1	PLA12_ARATH	SHGR2_ARATH
cellular_component	GO:0015030	Cajal body	2	12	0.166667	0.858438	0.393033	1	1	COIL_ARATH	Q9S826_ARATH
biological_process	GO:0010569	regulation of double-strand break repair via homologous recombination	2	4	0.5	0.986609	0.10789	1	1	RTEL1_ARATH	FDM1_ARATH
biological_process	GO:0010342	endosperm cellularization	2	3	0.666667	0.998392	0.0379791	1	1	RUK_ARATH	EDE1_ARATH
biological_process	GO:0000712	resolution of meiotic recombination intermediates	2	14	0.142857	0.779232	0.500932	1	1	XPF_ARATH	TOP3A_ARATH
molecular_function	GO:0015662	P-type ion transporter activity	2	17	0.117647	0.317913	0.832901	1	1	ECA1_ARATH	ECA4_ARATH
biological_process	GO:0034220	ion transmembrane transport	2	22	0.0909091	0.00338235	0.998231	0.755	1	ECA1_ARATH	ECA4_ARATH
biological_process	GO:0042761	very long-chain fatty acid biosynthetic process	2	22	0.0909091	0.514699	0.747635	1	1	KCR1_ARATH	MYB30_ARATH
biological_process	GO:0031022	nuclear migration along microfilament	2	4	0.5	0.994132	0.0700901	1	1	PMIR1_ARATH	KN14A_ARATH
biological_process	GO:0043248	proteasome assembly	2	17	0.117647	0.611913	0.670369	1	1	F4IVJ8_ARATH	A0A1P8AX98_ARATH
molecular_function	GO:0051213	dioxygenase activity	2	101	0.019802	0.000809572	0.99973	0.113	1	G2OX4_ARATH	A0A1P8BHF6_ARATH
molecular_function	GO:0004623	phospholipase A2 activity	2	9	0.222222	0.895893	0.333331	1	1	PLA2A_ARATH	A0A1P8B0P3_ARATH
molecular_function	GO:0003916	DNA topoisomerase activity	2	4	0.5	0.31924	0.871696	1	1	TOP3A_ARATH	F4JXC7_ARATH
biological_process	GO:1901001	negative regulation of response to salt stress	2	13	0.153846	0.779232	0.500932	1	1	SLK1_ARATH	LUH_ARATH
cellular_component	GO:0000421	autophagosome membrane	2	13	0.153846	0.830431	0.433663	1	1	ATG16_ARATH	F4J0P2_ARATH
biological_process	GO:0033619	membrane protein proteolysis	2	7	0.285714	0.94276	0.239318	1	1	SIPL1_ARATH	NAC40_ARATH
biological_process	GO:0080186	developmental vegetative growth	2	11	0.181818	0.975901	0.0894413	1	1	Q8RWV9_ARATH	F4JL60_ARATH
biological_process	GO:0048574	long-day photoperiodism, flowering	2	17	0.117647	0.7286	0.434923	1	1	PHL_ARATH	VOZ2_ARATH
biological_process	GO:0006596	polyamine biosynthetic process	2	13	0.153846	0.514699	0.747635	1	1	SPE1_ARATH	SPE2_ARATH
biological_process	GO:0008295	spermidine biosynthetic process	2	9	0.222222	0.921429	0.285246	1	1	SPE1_ARATH	SPE2_ARATH
molecular_function	GO:0008792	arginine decarboxylase activity	2	2	1	1	0.0138818	1	1	SPE1_ARATH	SPE2_ARATH
biological_process	GO:0006527	arginine catabolic process	2	3	0.666667	0.994132	0.0700901	1	1	SPE1_ARATH	SPE2_ARATH
biological_process	GO:0009554	megasporogenesis	2	12	0.166667	0.841657	0.41906	1	1	MYB88_ARATH	AGO9_ARATH
biological_process	GO:0042335	cuticle development	2	15	0.133333	0.546369	0.723786	1	1	BH080_ARATH	AB11G_ARATH
biological_process	GO:0009955	adaxial/abaxial pattern specification	2	9	0.222222	0.695846	0.488074	1	1	AGO1_ARATH	GIF1_ARATH
biological_process	GO:0060966	regulation of gene silencing by RNA	2	10	0.2	0.992533	0.0233921	1	1	MORC6_ARATH	EDM2_ARATH
biological_process	GO:0010103	stomatal complex morphogenesis	2	9	0.222222	0.86452	0.261938	1	1	TBG2_ARATH	TBG1_ARATH
molecular_function	GO:0008236	serine-type peptidase activity	2	26	0.0769231	7.96659e-06	0.999997	0	1	CRSP_ARATH	A0A2H1ZEM8_ARATH
biological_process	GO:0007346	regulation of mitotic cell cycle	2	13	0.153846	0.962337	0.0682686	1	1	CDKG1_ARATH	CK5P3_ARATH
biological_process	GO:0010044	response to aluminum ion	2	15	0.133333	0.891328	0.287044	1	1	LUH_ARATH	AB27B_ARATH
molecular_function	GO:0032452	histone demethylase activity	2	9	0.222222	0.510942	0.750438	1	1	ELF6_ARATH	A0A1P8AP94_ARATH
molecular_function	GO:0034647	histone H3-tri/di/monomethyl-lysine-4 demethylase activity	2	9	0.222222	0.920379	0.287486	1	1	ELF6_ARATH	A0A1P8AP94_ARATH
cellular_component	GO:0035619	root hair tip	2	9	0.222222	0.930648	0.264819	1	1	SCY2B_ARATH	KIP_ARATH
biological_process	GO:0009698	phenylpropanoid metabolic process	2	14	0.142857	0.00996326	0.995776	0.985	1	MD33A_ARATH	U73C7_ARATH
cellular_component	GO:0030915	Smc5-Smc6 complex	2	8	0.25	0.949698	0.221382	1	1	NSE4B_ARATH	Q84VP9_ARATH
biological_process	GO:0016570	histone modification	2	5	0.4	0.999962	7.99944e-05	1	0.103	VIP4_ARATH	F4K204_ARATH
molecular_function	GO:0016208	AMP binding	2	10	0.2	0.895893	0.333331	1	1	PV42B_ARATH	ACS_ARATH
molecular_function	GO:0030295	protein kinase activator activity	2	19	0.105263	0.495306	0.724547	1	1	TPX2_ARATH	F4K9U0_ARATH
biological_process	GO:2000377	regulation of reactive oxygen species metabolic process	2	25	0.08	0.649512	0.508418	1	1	GAI_ARATH	RGA_ARATH
biological_process	GO:0009861	jasmonic acid and ethylene-dependent systemic resistance	2	10	0.2	0.927983	0.220768	1	1	VIP1L_ARATH	F4J8C7_ARATH
molecular_function	GO:0004792	thiosulfate sulfurtransferase activity	2	9	0.222222	0.920379	0.287486	1	1	STR18_ARATH	F4JZ39_ARATH
molecular_function	GO:0030674	protein-macromolecule adaptor activity	2	21	0.0952381	0.208445	0.870473	1	1	RTOR2_ARATH	Q9M2K5_ARATH
cellular_component	GO:0005663	DNA replication factor C complex	2	11	0.181818	0.884701	0.351121	1	1	STIL3_ARATH	STI_ARATH
biological_process	GO:0000003	reproduction	2	8	0.25	0.999995	6.2477e-06	1	0.006	ALY2_ARATH	ALY1_ARATH
biological_process	GO:0006506	GPI anchor biosynthetic process	2	48	0.0416667	0.153003	0.932405	1	1	B3H7B7_ARATH	A8MQN4_ARATH
biological_process	GO:0046621	negative regulation of organ growth	2	9	0.222222	0.921429	0.285246	1	1	DA1_ARATH	Q1PDK3_ARATH
cellular_component	GO:0031262	Ndc80 complex	2	3	0.666667	0.998619	0.0344552	1	1	SPC25_ARATH	NUF2_ARATH
cellular_component	GO:0005786	signal recognition particle, endoplasmic reticulum targeting	2	13	0.153846	0.830431	0.433663	1	1	Q9FXD1_ARATH	Q9FXD4_ARATH
molecular_function	GO:0008312	7S RNA binding	2	13	0.153846	0.808945	0.463844	1	1	Q9FXD1_ARATH	Q9FXD4_ARATH
biological_process	GO:0071244	cellular response to carbon dioxide	2	7	0.285714	0.96088	0.193799	1	1	HT1_ARATH	GHR1_ARATH
biological_process	GO:0009934	regulation of meristem structural organization	2	20	0.1	0.578825	0.698057	1	1	AGO10_ARATH	FAS1_ARATH
biological_process	GO:0009772	photosynthetic electron transport in photosystem II	2	9	0.222222	0.921429	0.285246	1	1	PSBD_ARATH	STR4_ARATH
biological_process	GO:0071333	cellular response to glucose stimulus	2	12	0.166667	0.824295	0.388087	1	1	BZP63_ARATH	GLGB2_ARATH
biological_process	GO:0007029	endoplasmic reticulum organization	2	8	0.25	0.559403	0.644466	1	1	SC24A_ARATH	SC31B_ARATH
biological_process	GO:0030490	maturation of SSU-rRNA	2	13	0.153846	0.381516	0.774146	1	1	Q8LCC7_ARATH	F4JRD3_ARATH
biological_process	GO:0006826	iron ion transport	2	11	0.181818	0.954084	0.108159	1	1	S40A2_ARATH	IRT3_ARATH
biological_process	GO:0072598	protein localization to chloroplast	2	4	0.5	0.914289	0.162427	1	1	SCY2_ARATH	ALB4_ARATH
biological_process	GO:0034058	endosomal vesicle fusion	2	4	0.5	0.994132	0.0700901	1	1	VPS39_ARATH	F4JHM9_ARATH
biological_process	GO:0032509	endosome transport via multivesicular body sorting pathway	2	8	0.25	0.985093	0.0387795	1	1	GNOM_ARATH	VPS2A_ARATH
biological_process	GO:1900425	negative regulation of defense response to bacterium	2	17	0.117647	0.679211	0.608866	1	1	WRKY4_ARATH	CRSP_ARATH
cellular_component	GO:0005652	nuclear lamina	2	6	0.333333	0.978698	0.137359	1	1	CRWN4_ARATH	F4JXK3_ARATH
biological_process	GO:0072699	protein localization to cortical microtubule cytoskeleton	2	3	0.666667	0.998392	0.0379791	1	1	CSI3_ARATH	IQD5_ARATH
biological_process	GO:2001006	regulation of cellulose biosynthetic process	2	9	0.222222	0.948842	0.151971	1	1	CSI3_ARATH	IQD5_ARATH
biological_process	GO:0070940	dephosphorylation of RNA polymerase II C-terminal domain	2	19	0.105263	0.611913	0.670369	1	1	CPL3_ARATH	A0A1P8B2G0_ARATH
biological_process	GO:0010099	regulation of photomorphogenesis	2	13	0.153846	0.448642	0.760149	1	1	FB348_ARATH	O65680_ARATH
biological_process	GO:0010075	regulation of meristem growth	2	22	0.0909091	0.501674	0.651724	1	1	WOX9_ARATH	BAME3_ARATH
cellular_component	GO:0030875	rDNA protrusion	2	5	0.4	0.988392	0.098673	1	1	UBN1_ARATH	UBN2_ARATH
biological_process	GO:0006336	DNA replication-independent chromatin assembly	2	8	0.25	0.841657	0.41906	1	1	UBN1_ARATH	UBN2_ARATH
biological_process	GO:0009825	multidimensional cell growth	2	29	0.0689655	0.355534	0.825017	1	1	FZR2_ARATH	FAS1_ARATH
biological_process	GO:0045927	positive regulation of growth	2	18	0.111111	0.521974	0.658777	1	1	PSI3_ARATH	A0A1P8BEB8_ARATH
biological_process	GO:0072659	protein localization to plasma membrane	2	14	0.142857	0.909258	0.226436	1	1	FLOT3_ARATH	B9DH97_ARATH
biological_process	GO:0010114	response to red light	2	53	0.0377358	0.364796	0.776065	1	1	MED25_ARATH	PKS1_ARATH
biological_process	GO:0010199	organ boundary specification between lateral organs and the meristem	2	9	0.222222	0.921429	0.285246	1	1	SYD_ARATH	BRM_ARATH
biological_process	GO:0010120	camalexin biosynthetic process	2	11	0.181818	0.811107	0.460909	1	1	WRK33_ARATH	WRK70_ARATH
cellular_component	GO:0009532	plastid stroma	2	22	0.0909091	1.36479e-05	0.999992	0	1	CFM2_ARATH	CLPP4_ARATH
molecular_function	GO:0016538	cyclin-dependent protein serine/threonine kinase regulator activity	2	53	0.0377358	0.00998581	0.99802	0.86	1	CCT12_ARATH	A0A1P8B7P7_ARATH
biological_process	GO:0000079	regulation of cyclin-dependent protein serine/threonine kinase activity	2	47	0.0425532	0.0361221	0.991321	1	1	CK5P1_ARATH	CK5P3_ARATH
biological_process	GO:0022622	root system development	2	7	0.285714	0.515454	0.53523	1	1	M3K1_ARATH	MP3K2_ARATH
biological_process	GO:0061936	fusion of sperm to egg plasma membrane involved in double fertilization forming a zygote and endosperm	2	2	1	0.994132	0.0700901	1	1	HAP2_ARATH	GEX2_ARATH
biological_process	GO:0009704	de-etiolation	2	18	0.111111	0.645447	0.640655	1	1	PIF3_ARATH	PIF4_ARATH
biological_process	GO:0080148	negative regulation of response to water deprivation	2	5	0.4	0.986609	0.10789	1	1	RGLG2_ARATH	RGLG1_ARATH
biological_process	GO:0009643	photosynthetic acclimation	2	10	0.2	0.897215	0.330862	1	1	KEA3_ARATH	Q8RWI0_ARATH
molecular_function	GO:0030515	snoRNA binding	2	18	0.111111	0.815145	0.367694	1	1	HEAT1_ARATH	Q9S826_ARATH
molecular_function	GO:0004407	histone deacetylase activity	2	10	0.2	0.542689	0.726676	1	1	SIR1_ARATH	HDA18_ARATH
cellular_component	GO:0010369	chromocenter	2	8	0.25	0.908881	0.308244	1	1	HIT4_ARATH	CRWN4_ARATH
molecular_function	GO:0008889	glycerophosphodiester phosphodiesterase activity	2	21	0.0952381	0.542689	0.726676	1	1	GPDL4_ARATH	GPDL3_ARATH
cellular_component	GO:0005732	sno(s)RNA-containing ribonucleoprotein complex	2	6	0.333333	0.824419	0.354344	1	1	Q9S826_ARATH	Q9LR70_ARATH
biological_process	GO:0051513	regulation of monopolar cell growth	2	11	0.181818	0.870493	0.375607	1	1	A0A1P8ANX7_ARATH	Q0WNQ5_ARATH
biological_process	GO:0009718	anthocyanin-containing compound biosynthetic process	2	19	0.105263	0.448642	0.760149	1	1	MYC3_ARATH	Q9M2K5_ARATH
molecular_function	GO:0004709	MAP kinase kinase kinase activity	2	12	0.166667	0.839771	0.421876	1	1	M3K1_ARATH	M3K3A_ARATH
biological_process	GO:2000038	regulation of stomatal complex development	2	5	0.4	0.811107	0.460909	1	1	GTL1_ARATH	CRSP_ARATH
molecular_function	GO:0015085	calcium ion transmembrane transporter activity	2	9	0.222222	0.901308	0.168201	1	1	PAM71_ARATH	GDT14_ARATH
biological_process	GO:1902065	response to L-glutamate	2	5	0.4	0.986609	0.10789	1	1	M3K1_ARATH	MP3K2_ARATH
biological_process	GO:1902584	positive regulation of response to water deprivation	2	16	0.125	0.712956	0.574974	1	1	ARFC_ARATH	MYB88_ARATH
cellular_component	GO:0009514	glyoxysome	2	9	0.222222	0.985575	0.061718	1	1	MFP2_ARATH	ACS_ARATH
biological_process	GO:0016255	attachment of GPI anchor to protein	2	13	0.153846	0.811107	0.460909	1	1	F4JDA1_ARATH	Q949U5_ARATH
biological_process	GO:0009695	jasmonic acid biosynthetic process	2	20	0.1	0.636247	0.601907	1	1	PLA12_ARATH	LOX6_ARATH
molecular_function	GO:0004066	asparagine synthase (glutamine-hydrolyzing) activity	2	9	0.222222	0.920379	0.287486	1	1	F4JBH6_ARATH	A0A1I9LPY0_ARATH
biological_process	GO:0006529	asparagine biosynthetic process	2	9	0.222222	0.921429	0.285246	1	1	F4JBH6_ARATH	A0A1I9LPY0_ARATH
molecular_function	GO:0030552	cAMP binding	2	27	0.0740741	0.368007	0.844133	1	1	F4II92_ARATH	F4II93_ARATH
molecular_function	GO:0030553	cGMP binding	2	27	0.0740741	0.368007	0.844133	1	1	F4II92_ARATH	F4II93_ARATH
biological_process	GO:0010088	phloem development	2	31	0.0645161	0.258832	0.903	1	1	SEOB_ARATH	BAME3_ARATH
biological_process	GO:0006487	protein N-linked glycosylation	2	38	0.0526316	0.0434784	0.989213	1	1	OST1B_ARATH	GFAT1_ARATH
molecular_function	GO:0042285	xylosyltransferase activity	2	6	0.333333	0.710051	0.578071	1	1	IRX9_ARATH	MGP4_ARATH
molecular_function	GO:0004571	mannosyl-oligosaccharide 1,2-alpha-mannosidase activity	2	9	0.222222	0.920379	0.287486	1	1	MNS2_ARATH	A0A1I9LRE8_ARATH
biological_process	GO:0019287	isopentenyl diphosphate biosynthetic process, mevalonate pathway	2	8	0.25	0.921429	0.285246	1	1	HMDH1_ARATH	PMK_ARATH
biological_process	GO:0044805	late nucleophagy	2	4	0.5	0.994132	0.0700901	1	1	ATG9_ARATH	ATG7_ARATH
cellular_component	GO:0033597	mitotic checkpoint complex	2	5	0.4	0.988392	0.098673	1	1	CDC21_ARATH	CDC22_ARATH
biological_process	GO:0007094	mitotic spindle assembly checkpoint signaling	2	11	0.181818	0.841657	0.41906	1	1	MPS1_ARATH	Q9FFG4_ARATH
biological_process	GO:0045732	positive regulation of protein catabolic process	2	8	0.25	0.978263	0.0454769	1	1	UPL2_ARATH	UPL1_ARATH
molecular_function	GO:0008194	UDP-glycosyltransferase activity	2	80	0.025	0.0128925	0.991964	0.914	1	B3GT5_ARATH	B3GT7_ARATH
biological_process	GO:0006169	adenosine salvage	2	2	1	1	0.0137319	1	1	ADK2_ARATH	ADK1_ARATH
biological_process	GO:0009901	anther dehiscence	2	17	0.117647	0.578825	0.698057	1	1	LOX4_ARATH	LOX3_ARATH
biological_process	GO:0030308	negative regulation of cell growth	2	10	0.2	0.927983	0.220768	1	1	GTL1_ARATH	PLA12_ARATH
cellular_component	GO:0046861	glyoxysomal membrane	2	5	0.4	0.988392	0.098673	1	1	AB1D_ARATH	F4JJ27_ARATH
biological_process	GO:0010050	vegetative phase change	2	7	0.285714	0.811107	0.460909	1	1	ARFC_ARATH	AGO7_ARATH
molecular_function	GO:0035242	protein-arginine omega-N asymmetric methyltransferase activity	2	5	0.4	0.986403	0.108918	1	1	ANM13_ARATH	ANM14_ARATH
molecular_function	GO:0008469	histone-arginine N-methyltransferase activity	2	4	0.5	0.994038	0.0707898	1	1	ANM13_ARATH	ANM14_ARATH
molecular_function	GO:0016277	[myelin basic protein]-arginine N-methyltransferase activity	2	3	0.666667	0.998365	0.0383759	1	1	ANM13_ARATH	ANM14_ARATH
molecular_function	GO:0035241	protein-arginine omega-N monomethyltransferase activity	2	4	0.5	0.994038	0.0707898	1	1	ANM13_ARATH	ANM14_ARATH
biological_process	GO:0034971	histone H3-R17 methylation	2	3	0.666667	0.998392	0.0379791	1	1	ANM13_ARATH	ANM14_ARATH
biological_process	GO:0034970	histone H3-R2 methylation	2	2	1	1	0.0137319	1	1	ANM13_ARATH	ANM14_ARATH
biological_process	GO:0034972	histone H3-R26 methylation	2	2	1	1	0.0137319	1	1	ANM13_ARATH	ANM14_ARATH
biological_process	GO:0019919	peptidyl-arginine methylation, to asymmetrical-dimethyl arginine	2	3	0.666667	0.998392	0.0379791	1	1	ANM13_ARATH	ANM14_ARATH
biological_process	GO:0006892	post-Golgi vesicle-mediated transport	2	5	0.4	0.998615	0.00413308	1	0.99	VAB_ARATH	Q8VY20_ARATH
molecular_function	GO:0045735	nutrient reservoir activity	2	33	0.0606061	0.236513	0.913822	1	1	BZP10_ARATH	Q9FNC4_ARATH
biological_process	GO:0009267	cellular response to starvation	2	7	0.285714	0.471455	0.623226	1	1	BZP63_ARATH	RTOR2_ARATH
biological_process	GO:0099402	plant organ development	2	31	0.0645161	0.920023	0.0943759	1	1	A0A1P8B7V6_ARATH	A0A1P8B7W1_ARATH
cellular_component	GO:0012507	ER to Golgi transport vesicle membrane	2	16	0.125	0.978744	0.054747	1	1	SC16B_ARATH	MAG5_ARATH
biological_process	GO:1900363	regulation of mRNA polyadenylation	2	2	1	0.999842	0.0018458	1	0.907	CPSF_ARATH	EDM2_ARATH
molecular_function	GO:0005049	nuclear export signal receptor activity	2	17	0.117647	0.676101	0.611961	1	1	XPOT_ARATH	F4J3Q2_ARATH
molecular_function	GO:0030371	translation repressor activity	2	4	0.5	0.986403	0.108918	1	1	EXA1_ARATH	Q9M2K5_ARATH
cellular_component	GO:0016281	eukaryotic translation initiation factor 4F complex	2	9	0.222222	0.930648	0.264819	1	1	IF4G1_ARATH	IF4G_ARATH
molecular_function	GO:0034485	phosphatidylinositol-3,4,5-trisphosphate 5-phosphatase activity	2	14	0.142857	0.776805	0.503952	1	1	IP5PE_ARATH	F4IRT2_ARATH
cellular_component	GO:0048226	Casparian strip	2	16	0.125	0.739252	0.545844	1	1	GSO1_ARATH	MYB36_ARATH
biological_process	GO:0006012	galactose metabolic process	2	29	0.0689655	0.424162	0.777986	1	1	ARAE4_ARATH	A0A1P8BDS3_ARATH
biological_process	GO:0070192	chromosome organization involved in meiotic cell cycle	2	5	0.4	0.999357	0.00178305	1	0.887	PRD3_ARATH	A0A1P8AUL3_ARATH
biological_process	GO:0010589	leaf proximal/distal pattern formation	2	4	0.5	0.994132	0.0700901	1	1	DRB1_ARATH	AGO1_ARATH
biological_process	GO:1990961	xenobiotic detoxification by transmembrane export across the plasma membrane	2	72	0.0277778	0.00696368	0.998682	0.943	1	DTX34_ARATH	DTX31_ARATH
biological_process	GO:0010336	gibberellic acid homeostasis	2	6	0.333333	0.97554	0.149605	1	1	GAI_ARATH	TPR4_ARATH
biological_process	GO:0033206	meiotic cytokinesis	2	3	0.666667	0.998154	0.0145777	1	1	GAI_ARATH	RGA_ARATH
biological_process	GO:1905622	negative regulation of leaf development	2	2	1	1	0.0137319	1	1	GAI_ARATH	RGA_ARATH
biological_process	GO:1900033	negative regulation of trichome patterning	2	6	0.333333	0.97554	0.149605	1	1	GAI_ARATH	RGA_ARATH
molecular_function	GO:0008171	O-methyltransferase activity	2	40	0.05	0.0282171	0.991818	0.993	1	Q9CAQ3_ARATH	Q9CAQ4_ARATH
biological_process	GO:0019438	aromatic compound biosynthetic process	2	17	0.117647	1	8.27931e-16	1	0	Q9CAQ3_ARATH	Q9CAQ4_ARATH
biological_process	GO:0009954	proximal/distal pattern formation	2	5	0.4	0.998154	0.0145777	1	1	LBD36_ARATH	PDS5B_ARATH
biological_process	GO:0002240	response to molecule of oomycetes origin	2	6	0.333333	0.97554	0.149605	1	1	BZP10_ARATH	F4JUW0_ARATH
cellular_component	GO:0031314	extrinsic component of mitochondrial inner membrane	2	9	0.222222	0.930648	0.264819	1	1	NDB4_ARATH	F4JGL5_ARATH
molecular_function	GO:0004499	N,N-dimethylaniline monooxygenase activity	2	37	0.0540541	0.172109	0.942687	1	1	GSXL7_ARATH	GSXL4_ARATH
molecular_function	GO:0140618	ferric-chelate reductase (NADH) activity	2	7	0.285714	0.960318	0.195479	1	1	FRO5_ARATH	FRO4_ARATH
molecular_function	GO:0000293	ferric-chelate reductase activity	2	9	0.222222	0.920379	0.287486	1	1	FRO5_ARATH	FRO4_ARATH
molecular_function	GO:0016881	acid-amino acid ligase activity	2	20	0.1	0.103923	0.969377	1	1	GH34_ARATH	F4K2J2_ARATH
biological_process	GO:0042868	antisense RNA metabolic process	2	2	1	0.97554	0.149605	1	1	CTF64_ARATH	CTF77_ARATH
biological_process	GO:0098789	pre-mRNA cleavage required for polyadenylation	2	4	0.5	0.994132	0.0700901	1	1	CTF64_ARATH	Q9SAF2_ARATH
cellular_component	GO:1990124	messenger ribonucleoprotein complex	2	6	0.333333	0.978698	0.137359	1	1	DCP5L_ARATH	O65707_ARATH
biological_process	GO:0048317	seed morphogenesis	2	10	0.2	0.897215	0.330862	1	1	DA1_ARATH	ICE1_ARATH
biological_process	GO:0051214	RNAi-mediated antiviral immunity against RNA virus	2	3	0.666667	0.998392	0.0379791	1	1	DCL2_ARATH	DCL3_ARATH
molecular_function	GO:0016041	glutamate synthase (ferredoxin) activity	2	2	1	1	0.0138818	1	1	GLTB2_ARATH	GLTB1_ARATH
molecular_function	GO:0016040	glutamate synthase (NADH) activity	2	3	0.666667	0.998365	0.0383759	1	1	GLTB2_ARATH	GLTB1_ARATH
molecular_function	GO:0015930	glutamate synthase activity	2	3	0.666667	0.998365	0.0383759	1	1	GLTB2_ARATH	GLTB1_ARATH
biological_process	GO:0019676	ammonia assimilation cycle	2	6	0.333333	0.97554	0.149605	1	1	GLTB2_ARATH	GLTB1_ARATH
biological_process	GO:0006537	glutamate biosynthetic process	2	4	0.5	0.994132	0.0700901	1	1	GLTB2_ARATH	GLTB1_ARATH
biological_process	GO:0097054	L-glutamate biosynthetic process	2	3	0.666667	0.998392	0.0379791	1	1	GLTB2_ARATH	GLTB1_ARATH
biological_process	GO:0006972	hyperosmotic response	2	11	0.181818	0.597236	0.551576	1	1	MGAT1_ARATH	F4HPR9_ARATH
biological_process	GO:0009932	cell tip growth	2	11	0.181818	0.403452	0.684058	1	1	GPDL3_ARATH	ZDH22_ARATH
molecular_function	GO:0003978	UDP-glucose 4-epimerase activity	2	12	0.166667	0.839771	0.421876	1	1	ARAE4_ARATH	A0A1P8BDS3_ARATH
biological_process	GO:0045723	positive regulation of fatty acid biosynthetic process	2	7	0.285714	0.96088	0.193799	1	1	AP2L1_ARATH	MD15A_ARATH
biological_process	GO:0010093	specification of floral organ identity	2	12	0.166667	0.811107	0.460909	1	1	AP3_ARATH	SEP3_ARATH
molecular_function	GO:0003857	3-hydroxyacyl-CoA dehydrogenase activity	2	3	0.666667	0.998365	0.0383759	1	1	MFP2_ARATH	ECH2_ARATH
molecular_function	GO:0004300	enoyl-CoA hydratase activity	2	10	0.2	0.895893	0.333331	1	1	MFP2_ARATH	ECH2_ARATH
biological_process	GO:0008104	protein localization	2	18	0.111111	0.977385	0.0278582	1	1	EX84A_ARATH	F4JNM2_ARATH
biological_process	GO:0034756	regulation of iron ion transport	2	3	0.666667	0.999092	0.00891905	1	1	BTSL1_ARATH	BTSL2_ARATH
cellular_component	GO:0005884	actin filament	2	10	0.2	0.908881	0.308244	1	1	FIMB5_ARATH	VILI3_ARATH
biological_process	GO:0080033	response to nitrite	2	2	1	1	0.0137319	1	1	GPMA2_ARATH	Q84TG2_ARATH
molecular_function	GO:0000309	nicotinamide-nucleotide adenylyltransferase activity	2	4	0.5	0.994038	0.0707898	1	1	Q84Q59_ARATH	Q8L845_ARATH
cellular_component	GO:0005758	mitochondrial intermembrane space	2	32	0.0625	0.292278	0.885714	1	1	NDB2_ARATH	NDB4_ARATH
biological_process	GO:2000037	regulation of stomatal complex patterning	2	5	0.4	0.986609	0.10789	1	1	GTL1_ARATH	MYB88_ARATH
molecular_function	GO:0004420	hydroxymethylglutaryl-CoA reductase (NADPH) activity	2	2	1	1	0.0138818	1	1	HMDH1_ARATH	HMDH2_ARATH
biological_process	GO:0015936	coenzyme A metabolic process	2	2	1	0.371813	0.841862	1	1	HMDH1_ARATH	HMDH2_ARATH
biological_process	GO:0006873	cellular ion homeostasis	2	11	0.181818	0.522367	0.576971	1	1	SLAH3_ARATH	SLAH4_ARATH
biological_process	GO:0030261	chromosome condensation	2	10	0.2	0.998967	0.00457983	1	0.995	Q9LSK7_ARATH	A0A1I9LLC4_ARATH
biological_process	GO:0008652	cellular amino acid biosynthetic process	2	33	0.0606061	0.0249861	0.984688	1	1	AROG_ARATH	F4JIZ3_ARATH
molecular_function	GO:0004550	nucleoside diphosphate kinase activity	2	11	0.181818	0.868889	0.378268	1	1	KAD2_ARATH	F4JPD8_ARATH
biological_process	GO:0010506	regulation of autophagy	2	4	0.5	0.986283	0.0511585	1	1	RTOR2_ARATH	F4J8L1_ARATH
molecular_function	GO:0035673	oligopeptide transmembrane transporter activity	2	23	0.0869565	0.625701	0.561303	1	1	YSL8_ARATH	A0A1P8AQR0_ARATH
biological_process	GO:0090502	RNA phosphodiester bond hydrolysis, endonucleolytic	2	7	0.285714	0.746941	0.485301	1	1	ENDO2_ARATH	F4JXF0_ARATH
biological_process	GO:0010018	far-red light signaling pathway	2	4	0.5	0.994132	0.0700901	1	1	FAR1_ARATH	LAF1_ARATH
biological_process	GO:1900367	positive regulation of defense response to insect	2	7	0.285714	0.96088	0.193799	1	1	VIP1L_ARATH	CMTA3_ARATH
molecular_function	GO:0047627	adenylylsulfatase activity	2	13	0.153846	0.808945	0.463844	1	1	BH140_ARATH	A0A2H1ZE58_ARATH
biological_process	GO:0052545	callose localization	2	2	1	0.70944	0.456577	1	1	CRK2_ARATH	MYB35_ARATH
biological_process	GO:0006352	DNA-templated transcription, initiation	2	35	0.0571429	0.504199	0.603497	1	1	PBRP2_ARATH	A0A1P8BB52_ARATH
biological_process	GO:0048586	regulation of long-day photoperiodism, flowering	2	8	0.25	0.868369	0.271353	1	1	MED16_ARATH	GIGAN_ARATH
biological_process	GO:0010444	guard mother cell differentiation	2	11	0.181818	0.870493	0.375607	1	1	MYB88_ARATH	FAMA_ARATH
biological_process	GO:0009759	indole glucosinolate biosynthetic process	2	8	0.25	0.94276	0.239318	1	1	WRK70_ARATH	MYC2_ARATH
molecular_function	GO:0045551	cinnamyl-alcohol dehydrogenase activity	2	11	0.181818	0.868889	0.378268	1	1	CADH2_ARATH	CADH3_ARATH
molecular_function	GO:0052747	sinapyl alcohol dehydrogenase activity	2	11	0.181818	0.868889	0.378268	1	1	CADH2_ARATH	CADH3_ARATH
biological_process	GO:0006814	sodium ion transport	2	14	0.142857	0.546369	0.723786	1	1	CCX1_ARATH	ANTR1_ARATH
cellular_component	GO:0071007	U2-type catalytic step 2 spliceosome	2	10	0.2	0.908881	0.308244	1	1	C3H25_ARATH	C3H53_ARATH
molecular_function	GO:0030623	U5 snRNA binding	2	4	0.5	0.994038	0.0707898	1	1	PRP8A_ARATH	PRP8B_ARATH
molecular_function	GO:0001164	RNA polymerase I core promoter sequence-specific DNA binding	2	3	0.666667	0.998365	0.0383759	1	1	MEE12_ARATH	Q9LS59_ARATH
molecular_function	GO:0016759	cellulose synthase activity	2	10	0.2	0.309839	0.854035	1	1	CESA8_ARATH	CESA1_ARATH
biological_process	GO:0071497	cellular response to freezing	2	3	0.666667	0.998392	0.0379791	1	1	EF113_ARATH	Q9M2S1_ARATH
molecular_function	GO:0004180	carboxypeptidase activity	2	15	0.133333	0.00025703	0.999954	0.032	1	Q58FT9_ARATH	B3H4E6_ARATH
molecular_function	GO:0004535	poly(A)-specific ribonuclease activity	2	21	0.0952381	0.542689	0.726676	1	1	PARNL_ARATH	CCR4E_ARATH
biological_process	GO:0006821	chloride transport	2	11	0.181818	0.779232	0.500932	1	1	SLAH3_ARATH	ICLN_ARATH
biological_process	GO:1905499	trichome papilla formation	2	3	0.666667	0.998392	0.0379791	1	1	MED16_ARATH	MED25_ARATH
biological_process	GO:0000919	cell plate assembly	2	6	0.333333	0.982255	0.0720167	1	1	TR120_ARATH	F4KGM7_ARATH
biological_process	GO:0032786	positive regulation of DNA-templated transcription, elongation	2	11	0.181818	0.86452	0.261938	1	1	CCT12_ARATH	THO5A_ARATH
biological_process	GO:0010310	regulation of hydrogen peroxide metabolic process	2	8	0.25	0.746401	0.538983	1	1	CDR1_ARATH	F4JUW0_ARATH
biological_process	GO:0055088	lipid homeostasis	2	18	0.111111	0.280175	0.846997	1	1	FAX1_ARATH	Y5520_ARATH
biological_process	GO:0048509	regulation of meristem development	2	10	0.2	0.9938	0.014811	1	1	AHK3_ARATH	AHK2_ARATH
cellular_component	GO:0000110	nucleotide-excision repair factor 1 complex	2	2	1	1	0.0124058	1	0.99	ERCC1_ARATH	XPF_ARATH
biological_process	GO:0006296	nucleotide-excision repair, DNA incision, 5'-to lesion	2	4	0.5	0.994132	0.0700901	1	1	ERCC1_ARATH	XPF_ARATH
molecular_function	GO:0015299	solute:proton antiporter activity	2	32	0.0625	0.260421	0.86024	1	1	KEA3_ARATH	CHX11_ARATH
biological_process	GO:0140352	export from cell	2	6	0.333333	0.186953	0.869331	1	1	AB14G_ARATH	AB31G_ARATH
biological_process	GO:0010222	stem vascular tissue pattern formation	2	6	0.333333	0.97554	0.149605	1	1	AB14G_ARATH	AB11G_ARATH
biological_process	GO:0006913	nucleocytoplasmic transport	2	9	0.222222	0.996114	0.00767557	1	1	NU155_ARATH	Q8W4K6_ARATH
molecular_function	GO:0009884	cytokinin receptor activity	2	3	0.666667	0.998365	0.0383759	1	1	AHK3_ARATH	AHK2_ARATH
biological_process	GO:0071329	cellular response to sucrose stimulus	2	7	0.285714	0.921429	0.285246	1	1	AHK3_ARATH	GLGB2_ARATH
biological_process	GO:0034757	negative regulation of iron ion transport	2	2	1	1	0.0137319	1	1	AHK3_ARATH	AHK2_ARATH
biological_process	GO:0010271	regulation of chlorophyll catabolic process	2	3	0.666667	0.97554	0.149605	1	1	AHK3_ARATH	AHK2_ARATH
biological_process	GO:0048578	positive regulation of long-day photoperiodism, flowering	2	10	0.2	0.897215	0.330862	1	1	VOZ2_ARATH	GIGAN_ARATH
molecular_function	GO:0003849	3-deoxy-7-phosphoheptulonate synthase activity	2	4	0.5	0.994038	0.0707898	1	1	AROG_ARATH	F4JIZ3_ARATH
biological_process	GO:0009073	aromatic amino acid family biosynthetic process	2	20	0.1	0.233135	0.870913	1	1	AROG_ARATH	F4JIZ3_ARATH
biological_process	GO:0009423	chorismate biosynthetic process	2	19	0.105263	0.611913	0.670369	1	1	AROG_ARATH	F4JIZ3_ARATH
biological_process	GO:0010600	regulation of auxin biosynthetic process	2	8	0.25	0.779232	0.500932	1	1	PIF5_ARATH	PIF4_ARATH
molecular_function	GO:0080025	phosphatidylinositol-3,5-bisphosphate binding	2	8	0.25	0.941967	0.241294	1	1	AT18D_ARATH	AT18A_ARATH
biological_process	GO:0044804	autophagy of nucleus	2	9	0.222222	0.998684	0.00726641	1	1	AT18D_ARATH	AT18A_ARATH
molecular_function	GO:0033699	DNA 5'-adenosine monophosphate hydrolase activity	2	2	1	1	0.0138818	1	1	BH140_ARATH	A0A2H1ZE58_ARATH
biological_process	GO:0000012	single strand break repair	2	5	0.4	0.986609	0.10789	1	1	BH140_ARATH	DNLI1_ARATH
biological_process	GO:0033523	histone H2B ubiquitination	2	4	0.5	0.999147	0.0133906	1	1	BRE1A_ARATH	BRE1B_ARATH
biological_process	GO:0010315	auxin efflux	2	16	0.125	0.712956	0.574974	1	1	RHM1_ARATH	AB1B_ARATH
biological_process	GO:0010440	stomatal lineage progression	2	7	0.285714	0.923831	0.20059	1	1	TCX2_ARATH	ICE1_ARATH
biological_process	GO:0018107	peptidyl-threonine phosphorylation	2	12	0.166667	0.779232	0.500932	1	1	YAK1_ARATH	Q8RX85_ARATH
molecular_function	GO:0004534	5'-3' exoribonuclease activity	2	7	0.285714	0.960318	0.195479	1	1	XRN4_ARATH	A0A1P8AQR8_ARATH
molecular_function	GO:0003886	DNA (cytosine-5-)-methyltransferase activity	2	11	0.181818	0.868889	0.378268	1	1	CMT2_ARATH	A0A1P8BCY7_ARATH
biological_process	GO:1990641	response to iron ion starvation	2	13	0.153846	0.811107	0.460909	1	1	MYB72_ARATH	AB1K7_ARATH
molecular_function	GO:0008836	diaminopimelate decarboxylase activity	2	2	1	1	0.0138818	1	1	DCDA2_ARATH	DCDA1_ARATH
cellular_component	GO:0031428	box C/D RNP complex	2	11	0.181818	0.884701	0.351121	1	1	Q8LCC7_ARATH	F4JRD3_ARATH
cellular_component	GO:0005960	glycine cleavage complex	2	5	0.4	0.988392	0.098673	1	1	GCSP1_ARATH	GCSP2_ARATH
biological_process	GO:0019464	glycine decarboxylation via glycine cleavage system	2	6	0.333333	0.97554	0.149605	1	1	GCSP1_ARATH	GCSP2_ARATH
biological_process	GO:0051754	meiotic sister chromatid cohesion, centromeric	2	5	0.4	0.97554	0.149605	1	1	SCC11_ARATH	Q9FFG4_ARATH
biological_process	GO:0019222	regulation of metabolic process	2	6	0.333333	1	1.96021e-30	1	0	Q9SA31_ARATH	A0A1P8BBV1_ARATH
molecular_function	GO:0017150	tRNA dihydrouridine synthase activity	2	11	0.181818	0.868889	0.378268	1	1	DUS3L_ARATH	Q9FH91_ARATH
cellular_component	GO:0043078	polar nucleus	2	6	0.333333	0.978698	0.137359	1	1	IKU1_ARATH	DME_ARATH
biological_process	GO:1900865	chloroplast RNA modification	2	22	0.0909091	0.425572	0.808794	1	1	MORF1_ARATH	PP246_ARATH
molecular_function	GO:0015079	potassium ion transmembrane transporter activity	2	23	0.0869565	0.204554	0.8897	1	1	POT6_ARATH	F4JU14_ARATH
biological_process	GO:0010555	response to mannitol	2	16	0.125	0.679211	0.608866	1	1	SKIP_ARATH	Q9LRX5_ARATH
biological_process	GO:0006614	SRP-dependent cotranslational protein targeting to membrane	2	14	0.142857	0.636247	0.601907	1	1	Q9FXD1_ARATH	Q9FXD4_ARATH
biological_process	GO:0070676	intralumenal vesicle formation	2	5	0.4	0.986609	0.10789	1	1	FREE1_ARATH	VPS2A_ARATH
biological_process	GO:0051262	protein tetramerization	2	7	0.285714	0.989868	0.0407582	1	1	FUM1_ARATH	FUM2_ARATH
cellular_component	GO:0008275	gamma-tubulin small complex	2	2	1	1	0.0124058	1	0.99	GACP2_ARATH	GACP3_ARATH
biological_process	GO:0090063	positive regulation of microtubule nucleation	2	2	1	1	0.0137319	1	1	GACP2_ARATH	GACP3_ARATH
biological_process	GO:0005976	polysaccharide metabolic process	2	3	0.666667	0.363181	0.684555	1	1	GXM3_ARATH	DPE2_ARATH
biological_process	GO:0071763	nuclear membrane organization	2	3	0.666667	0.999092	0.00891905	1	1	NUP1_ARATH	F4K465_ARATH
biological_process	GO:0060772	leaf phyllotactic patterning	2	4	0.5	0.994132	0.0700901	1	1	AIL7_ARATH	F4KGW7_ARATH
biological_process	GO:0045144	meiotic sister chromatid segregation	2	3	0.666667	0.999987	8.03593e-05	1	0.103	WAPL1_ARATH	WAPL2_ARATH
biological_process	GO:0071922	regulation of cohesin loading	2	3	0.666667	0.998392	0.0379791	1	1	WAPL1_ARATH	WAPL2_ARATH
biological_process	GO:0080009	mRNA methylation	2	5	0.4	0.986609	0.10789	1	1	VIR_ARATH	HAKAI_ARATH
biological_process	GO:0001510	RNA methylation	2	27	0.0740741	0.124028	0.938905	1	1	NOP2C_ARATH	Q8VYC4_ARATH
cellular_component	GO:0000791	euchromatin	2	8	0.25	0.884701	0.351121	1	1	MRE11_ARATH	SSRP1_ARATH
biological_process	GO:0051304	chromosome separation	2	2	1	0.783737	0.369318	1	1	MPS1_ARATH	ESP1_ARATH
biological_process	GO:0006624	vacuolar protein processing	2	8	0.25	0.94276	0.239318	1	1	MIP3_ARATH	MIP2_ARATH
molecular_function	GO:0008296	3'-5'-exodeoxyribonuclease activity	2	5	0.4	0.956242	0.160229	1	1	MRE11_ARATH	A0A1P8BB63_ARATH
cellular_component	GO:0009527	plastid outer membrane	2	10	0.2	0.589657	0.558587	1	1	Q9FFG3_ARATH	Q9SRL6_ARATH
biological_process	GO:0032958	inositol phosphate biosynthetic process	2	9	0.222222	0.712956	0.574974	1	1	VIP1L_ARATH	F4J8C7_ARATH
molecular_function	GO:0046873	metal ion transmembrane transporter activity	2	15	0.133333	0.462878	0.612919	1	1	PAM71_ARATH	GDT14_ARATH
biological_process	GO:0032468	Golgi calcium ion homeostasis	2	5	0.4	0.986609	0.10789	1	1	PAM71_ARATH	GDT14_ARATH
biological_process	GO:0032472	Golgi calcium ion transport	2	5	0.4	0.986609	0.10789	1	1	PAM71_ARATH	GDT14_ARATH
biological_process	GO:0071421	manganese ion transmembrane transport	2	8	0.25	0.94276	0.239318	1	1	PAM71_ARATH	GDT14_ARATH
biological_process	GO:0000972	transcription-dependent tethering of RNA polymerase II gene DNA at nuclear periphery	2	3	0.666667	0.991081	0.0572398	1	1	NU133_ARATH	NU155_ARATH
biological_process	GO:0080182	histone H3-K4 trimethylation	2	7	0.285714	0.94276	0.239318	1	1	MSI5_ARATH	MSI4_ARATH
biological_process	GO:0051307	meiotic chromosome separation	2	2	1	0.989868	0.0407582	1	1	ESP1_ARATH	HTR12_ARATH
molecular_function	GO:0034511	U3 snoRNA binding	2	6	0.333333	0.975176	0.150965	1	1	NOF1_ARATH	Q9ASU6_ARATH
biological_process	GO:0006644	phospholipid metabolic process	2	22	0.0909091	0.0798988	0.943907	1	1	PLA2A_ARATH	A0A1P8B0P3_ARATH
biological_process	GO:0000727	double-strand break repair via break-induced replication	2	12	0.166667	0.841657	0.41906	1	1	MCM2_ARATH	MCM6_ARATH
biological_process	GO:0090307	mitotic spindle assembly	2	11	0.181818	0.841657	0.41906	1	1	TPX2_ARATH	F4K9U0_ARATH
cellular_component	GO:0000418	RNA polymerase IV complex	2	15	0.133333	0.770522	0.510207	1	1	RPD2B_ARATH	NRPD2_ARATH
biological_process	GO:0016560	protein import into peroxisome matrix, docking	2	4	0.5	0.994132	0.0700901	1	1	PEX5_ARATH	PEX14_ARATH
biological_process	GO:0071596	ubiquitin-dependent protein catabolic process via the N-end rule pathway	2	3	0.666667	0.998392	0.0379791	1	1	PRT6_ARATH	A0A1P8BFH3_ARATH
biological_process	GO:0035987	endodermal cell differentiation	2	2	1	0.998392	0.0379791	1	1	GSO1_ARATH	MYB36_ARATH
molecular_function	GO:0015245	fatty acid transmembrane transporter activity	2	3	0.666667	0.998365	0.0383759	1	1	FAX1_ARATH	AB11G_ARATH
biological_process	GO:1905775	negative regulation of DNA helicase activity	2	3	0.666667	0.998392	0.0379791	1	1	MCM2_ARATH	F4HPK7_ARATH
cellular_component	GO:0000323	lytic vacuole	2	8	0.25	0.473271	0.687082	1	1	RD19C_ARATH	Q8H1E1_ARATH
molecular_function	GO:0048531	beta-1,3-galactosyltransferase activity	2	3	0.666667	0.998365	0.0383759	1	1	B3GT5_ARATH	B3GT7_ARATH
biological_process	GO:0050482	arachidonic acid secretion	2	8	0.25	0.94276	0.239318	1	1	PLA2A_ARATH	A0A1P8B0P3_ARATH
cellular_component	GO:0019774	proteasome core complex, beta-subunit complex	2	11	0.181818	0.884701	0.351121	1	1	PSB7B_ARATH	PSB7A_ARATH
biological_process	GO:0032527	protein exit from endoplasmic reticulum	2	6	0.333333	0.927983	0.220768	1	1	F4KH34_ARATH	F4IP68_ARATH
biological_process	GO:0010393	galacturonan metabolic process	2	2	1	0.0989978	0.936951	1	1	LUH_ARATH	LEUNG_ARATH
biological_process	GO:0051176	positive regulation of sulfur metabolic process	2	4	0.5	0.897215	0.330862	1	1	PIAL1_ARATH	PIAL2_ARATH
biological_process	GO:0006546	glycine catabolic process	2	4	0.5	0.985422	0.0785709	1	1	GCSP1_ARATH	B3H5Y8_ARATH
biological_process	GO:0032465	regulation of cytokinesis	2	6	0.333333	0.96088	0.193799	1	1	MB3R4_ARATH	AUR1_ARATH
biological_process	GO:0044255	cellular lipid metabolic process	2	11	0.181818	3.08997e-05	0.999981	0.008	1	PAH2_ARATH	PAH1_ARATH
molecular_function	GO:0008097	5S rRNA binding	2	17	0.117647	0.676101	0.611961	1	1	Q9SUR4_ARATH	F4JPA3_ARATH
biological_process	GO:0009653	anatomical structure morphogenesis	2	4	0.5	0.999696	0.000423243	1	0.403	TCP20_ARATH	ARP8_ARATH
biological_process	GO:0043481	anthocyanin accumulation in tissues in response to UV light	2	5	0.4	0.986609	0.10789	1	1	HUA2_ARATH	AB1B_ARATH
biological_process	GO:0048658	anther wall tapetum development	2	14	0.142857	0.79941	0.421175	1	1	MYB35_ARATH	F4ILG6_ARATH
cellular_component	GO:0071006	U2-type catalytic step 1 spliceosome	2	9	0.222222	0.930648	0.264819	1	1	C3H25_ARATH	C3H53_ARATH
cellular_component	GO:0017053	transcription repressor complex	2	8	0.25	0.908881	0.308244	1	1	ALY2_ARATH	ALY1_ARATH
molecular_function	GO:0043169	cation binding	2	6	0.333333	0.178246	0.83438	1	1	PARNL_ARATH	GLGB2_ARATH
biological_process	GO:0001709	cell fate determination	2	12	0.166667	0.779232	0.500932	1	1	ZWIP2_ARATH	C3H37_ARATH
biological_process	GO:1903426	regulation of reactive oxygen species biosynthetic process	2	6	0.333333	0.870432	0.320789	1	1	SIK1_ARATH	TATB_ARATH
cellular_component	GO:0070461	SAGA-type complex	2	5	0.4	0.956888	0.109746	1	1	F4JPL2_ARATH	F4IPJ1_ARATH
molecular_function	GO:0019789	SUMO transferase activity	2	5	0.4	0.986403	0.108918	1	1	PIAL1_ARATH	PIAL2_ARATH
biological_process	GO:0070478	nuclear-transcribed mRNA catabolic process, 3'-5' exonucleolytic nonsense-mediated decay	2	2	1	1	0.0137319	1	1	SKI2_ARATH	SKI3_ARATH
biological_process	GO:0090065	regulation of production of siRNA involved in RNA interference	2	3	0.666667	0.986609	0.10789	1	1	SKI2_ARATH	SAC3B_ARATH
biological_process	GO:0033353	S-adenosylmethionine cycle	2	3	0.666667	0.999991	0.000157865	1	0.201	SAHH1_ARATH	SAHH2_ARATH
biological_process	GO:0033617	mitochondrial cytochrome c oxidase assembly	2	14	0.142857	0.779232	0.500932	1	1	OXA1_ARATH	ALB33_ARATH
biological_process	GO:0032979	protein insertion into mitochondrial inner membrane from matrix	2	6	0.333333	0.97554	0.149605	1	1	OXA1_ARATH	ALB33_ARATH
cellular_component	GO:0008278	cohesin complex	2	8	0.25	0.858438	0.393033	1	1	SCC11_ARATH	SMC1_ARATH
cellular_component	GO:0012506	vesicle membrane	2	4	0.5	0.990723	0.0143456	1	0.995	Q9LZN4_ARATH	Q9C8R6_ARATH
biological_process	GO:0000212	meiotic spindle organization	2	4	0.5	0.999998	5.84542e-05	1	0.078	TBG2_ARATH	TBG1_ARATH
cellular_component	GO:0031510	SUMO activating enzyme complex	2	5	0.4	0.988392	0.098673	1	1	SAE2_ARATH	F4IHI1_ARATH
molecular_function	GO:0019948	SUMO activating enzyme activity	2	5	0.4	0.986403	0.108918	1	1	SAE2_ARATH	F4IHI1_ARATH
biological_process	GO:0042939	tripeptide transport	2	3	0.666667	0.96088	0.193799	1	1	PTR1_ARATH	PTR2_ARATH
biological_process	GO:0070973	protein localization to endoplasmic reticulum exit site	2	13	0.153846	0.811107	0.460909	1	1	SC16B_ARATH	MAG5_ARATH
cellular_component	GO:0009360	DNA polymerase III complex	2	7	0.285714	0.965776	0.178612	1	1	STIL3_ARATH	STI_ARATH
cellular_component	GO:0000781	chromosome, telomeric region	2	13	0.153846	0.707495	0.579622	1	1	RFA2A_ARATH	RFA2B_ARATH
biological_process	GO:0010411	xyloglucan metabolic process	2	53	0.0377358	0.0346561	0.98964	1	1	XTH26_ARATH	TBL27_ARATH
biological_process	GO:0080165	callose deposition in phloem sieve plate	2	3	0.666667	0.998392	0.0379791	1	1	SUS5_ARATH	CALS7_ARATH
biological_process	GO:0009314	response to radiation	2	3	0.666667	0.906739	0.112603	1	1	POLH_ARATH	XPF_ARATH
biological_process	GO:0071108	protein K48-linked deubiquitination	2	6	0.333333	0.97554	0.149605	1	1	AMSH3_ARATH	F4JMQ2_ARATH
biological_process	GO:0048236	plant-type sporogenesis	2	5	0.4	0.987544	0.0334082	1	1	PRD3_ARATH	A0A1P8AUL3_ARATH
molecular_function	GO:0043715	2,3-diketo-5-methylthiopentyl-1-phosphate enolase activity	2	2	1	1	0.0138818	1	1	MTBC_ARATH	A0A1P8BAY5_ARATH
molecular_function	GO:0043716	2-hydroxy-3-keto-5-methylthiopentenyl-1-phosphate phosphatase activity	2	2	1	1	0.0138818	1	1	MTBC_ARATH	A0A1P8BAY5_ARATH
cellular_component	GO:0000445	THO complex part of transcription export complex	2	7	0.285714	0.965776	0.178612	1	1	THOC2_ARATH	THO5A_ARATH
biological_process	GO:0010587	miRNA catabolic process	2	6	0.333333	0.97554	0.149605	1	1	XRN4_ARATH	F4I526_ARATH
molecular_function	GO:0004825	methionine-tRNA ligase activity	2	3	0.666667	0.998365	0.0383759	1	1	SYMM_ARATH	A8MRF2_ARATH
biological_process	GO:0006431	methionyl-tRNA aminoacylation	2	3	0.666667	0.998392	0.0379791	1	1	SYMM_ARATH	A8MRF2_ARATH
molecular_function	GO:0004649	poly(ADP-ribose) glycohydrolase activity	2	4	0.5	0.994038	0.0707898	1	1	PARG1_ARATH	A8MRN2_ARATH
biological_process	GO:0006301	postreplication repair	2	13	0.153846	0.999879	0.000612525	1	0.486	MCMBP_ARATH	Q84VP9_ARATH
biological_process	GO:0071588	hydrogen peroxide mediated signaling pathway	2	3	0.666667	0.999147	0.0133906	1	1	TGA9_ARATH	TGA10_ARATH
molecular_function	GO:0000828	inositol hexakisphosphate kinase activity	2	3	0.666667	0.994986	0.0396819	1	1	VIP1L_ARATH	F4J8C7_ARATH
biological_process	GO:0043488	regulation of mRNA stability	2	6	0.333333	0.999712	0.000862195	1	0.654	Q9LTX1_ARATH	F4J9U9_ARATH
biological_process	GO:0043981	histone H4-K5 acetylation	2	7	0.285714	0.96088	0.193799	1	1	EAF1A_ARATH	EAF1B_ARATH
molecular_function	GO:0019706	protein-cysteine S-palmitoyltransferase activity	2	31	0.0645161	0.275453	0.894704	1	1	ZDH17_ARATH	ZDH22_ARATH
biological_process	GO:0051641	cellular localization	2	3	0.666667	0.999988	1.70352e-05	1	0.018	TBG2_ARATH	TBG1_ARATH
biological_process	GO:1990571	meiotic centromere clustering	2	2	1	1	0.0137319	1	1	WAPL1_ARATH	WAPL2_ARATH
biological_process	GO:0010789	meiotic sister chromatid cohesion involved in meiosis I	2	2	1	1	0.0137319	1	1	WAPL1_ARATH	WAPL2_ARATH
biological_process	GO:0060623	regulation of chromosome condensation	2	2	1	1	0.0137319	1	1	WAPL1_ARATH	WAPL2_ARATH
biological_process	GO:0010115	regulation of abscisic acid biosynthetic process	2	9	0.222222	0.746401	0.538983	1	1	ICE1_ARATH	MYB96_ARATH
molecular_function	GO:0071568	UFM1 transferase activity	2	2	1	1	2.26527e-05	1	0.009	UFL1_ARATH	UFC1_ARATH
biological_process	GO:1990592	protein K69-linked ufmylation	2	3	0.666667	0.998392	0.0379791	1	1	UFL1_ARATH	UFC1_ARATH
molecular_function	GO:0015210	uracil transmembrane transporter activity	2	5	0.4	0.994986	0.0396819	1	1	UPS1_ARATH	UPS5_ARATH
biological_process	GO:0051103	DNA ligation involved in DNA repair	2	4	0.5	0.994132	0.0700901	1	1	DNLI4_ARATH	A0A1P8BHE2_ARATH
biological_process	GO:0061087	positive regulation of histone H3-K27 methylation	2	6	0.333333	0.94276	0.239318	1	1	VIN3_ARATH	EDM2_ARATH
biological_process	GO:0051571	positive regulation of histone H3-K4 methylation	2	5	0.4	0.986609	0.10789	1	1	VIN3_ARATH	ATX5_ARATH
biological_process	GO:0033674	positive regulation of kinase activity	2	3	0.666667	0.997988	0.0101324	1	1	ILA_ARATH	A0A1P8AT97_ARATH
cellular_component	GO:0005662	DNA replication factor A complex	2	8	0.25	0.949698	0.221382	1	1	RFA2A_ARATH	RFA2B_ARATH
molecular_function	GO:0005324	long-chain fatty acid transporter activity	2	2	1	1	0.0138818	1	1	AB2D_ARATH	AB1D_ARATH
biological_process	GO:0015910	long-chain fatty acid import into peroxisome	2	2	1	1	0.0137319	1	1	AB2D_ARATH	AB1D_ARATH
biological_process	GO:0042760	very long-chain fatty acid catabolic process	2	2	1	1	0.0137319	1	1	AB2D_ARATH	AB1D_ARATH
biological_process	GO:0080051	cutin transport	2	3	0.666667	0.998392	0.0379791	1	1	AB32G_ARATH	AB11G_ARATH
biological_process	GO:0045332	phospholipid translocation	2	12	0.166667	0.94349	0.188893	1	1	ALA2_ARATH	ALA5_ARATH
biological_process	GO:0000388	spliceosome conformational change to release U4 (or U4atac) and U1 (or U11)	2	2	1	1	0.0137319	1	1	DEXHC_ARATH	DEXHD_ARATH
biological_process	GO:0033260	nuclear DNA replication	2	2	1	0.975901	0.0894413	1	1	ARS1_ARATH	F4JE17_ARATH
molecular_function	GO:0047131	saccharopine dehydrogenase (NAD+, L-glutamate-forming) activity	2	2	1	1	0.0138818	1	1	AASS_ARATH	F4JVY8_ARATH
molecular_function	GO:0047130	saccharopine dehydrogenase (NADP+, L-lysine-forming) activity	2	2	1	1	0.0138818	1	1	AASS_ARATH	F4JVY8_ARATH
molecular_function	GO:0004753	saccharopine dehydrogenase activity	2	2	1	1	0.0138818	1	1	AASS_ARATH	F4JVY8_ARATH
biological_process	GO:0060774	auxin mediated signaling pathway involved in phyllotactic patterning	2	3	0.666667	0.998392	0.0379791	1	1	AIL7_ARATH	F4KGW7_ARATH
molecular_function	GO:0008447	L-ascorbate oxidase activity	2	7	0.285714	0.960318	0.195479	1	1	F4K6Z6_ARATH	F4K6Z5_ARATH
biological_process	GO:0048759	xylem vessel member cell differentiation	2	11	0.181818	0.870493	0.375607	1	1	E70A1_ARATH	Q9FRR2_ARATH
biological_process	GO:0071479	cellular response to ionizing radiation	2	2	1	0.995086	0.0391195	1	1	NBS1_ARATH	F4J7B7_ARATH
cellular_component	GO:0044611	nuclear pore inner ring	2	2	1	1	0.0124058	1	0.99	NU155_ARATH	F4JUG3_ARATH
biological_process	GO:0007142	male meiosis II	2	5	0.4	0.986609	0.10789	1	1	Q9FNC2_ARATH	F4I444_ARATH
biological_process	GO:0098657	import into cell	2	2	1	0.751934	0.446801	1	1	AB40G_ARATH	AB30G_ARATH
cellular_component	GO:0008622	epsilon DNA polymerase complex	2	8	0.25	0.949698	0.221382	1	1	DPB2_ARATH	A0A1P8BH84_ARATH
biological_process	GO:0042325	regulation of phosphorylation	2	3	0.666667	0.624441	0.496915	1	1	2AAB_ARATH	2AAG_ARATH
biological_process	GO:0033212	iron import into cell	2	2	1	0.998392	0.0379791	1	1	BTSL1_ARATH	BTSL2_ARATH
biological_process	GO:0098711	iron ion import across plasma membrane	2	2	1	1	0.0137319	1	1	BTSL1_ARATH	BTSL2_ARATH
molecular_function	GO:0016594	glycine binding	2	2	1	1	0.0138818	1	1	GCSP1_ARATH	GCSP2_ARATH
molecular_function	GO:0042800	histone methyltransferase activity (H3-K4 specific)	2	5	0.4	0.986403	0.108918	1	1	ATXR3_ARATH	ASHH2_ARATH
molecular_function	GO:0004329	formate-tetrahydrofolate ligase activity	2	3	0.666667	0.998365	0.0383759	1	1	FTHS_ARATH	Q9ZUP9_ARATH
cellular_component	GO:0000109	nucleotide-excision repair complex	2	2	1	0.999704	0.00407213	1	0.666	ACSA1_ARATH	F4HQX6_ARATH
biological_process	GO:0032147	activation of protein kinase activity	2	11	0.181818	0.870493	0.375607	1	1	A0A1P8BGZ9_ARATH	F4K9T9_ARATH
molecular_function	GO:0008375	acetylglucosaminyltransferase activity	2	14	0.142857	0.495306	0.724547	1	1	F4I8P5_ARATH	F4JTL6_ARATH
cellular_component	GO:0042765	GPI-anchor transamidase complex	2	13	0.153846	0.830431	0.433663	1	1	F4JDA1_ARATH	Q949U5_ARATH
biological_process	GO:0010847	regulation of chromatin assembly	2	2	1	0.995086	0.0391195	1	1	F4IKF3_ARATH	Q9T073_ARATH
biological_process	GO:1900364	negative regulation of mRNA polyadenylation	2	5	0.4	0.986609	0.10789	1	1	Q9LTX1_ARATH	F4J9U9_ARATH
molecular_function	GO:0102210	rhamnogalacturonan endolyase activity	2	17	0.117647	0.676101	0.611961	1	1	Q9ZQ51_ARATH	A0A1P8B357_ARATH
molecular_function	GO:0004812	aminoacyl-tRNA ligase activity	2	15	0.133333	0.0751679	0.963816	1	1	Q9SUR4_ARATH	F4JPA3_ARATH
biological_process	GO:0034356	NAD biosynthesis via nicotinamide riboside salvage pathway	2	2	1	1	0.0137319	1	1	Q84Q59_ARATH	Q8L845_ARATH
cellular_component	GO:0016591	RNA polymerase II, holoenzyme	2	3	0.666667	0.981574	0.0356536	1	1	Q9FJP7_ARATH	Q8GUK8_ARATH
molecular_function	GO:0004591	oxoglutarate dehydrogenase (succinyl-transferring) activity	2	2	1	1	0.0138818	1	1	Q9FLH2_ARATH	F4IWV2_ARATH
cellular_component	GO:0071818	BAT3 complex	2	3	0.666667	0.998619	0.0344552	1	1	Q8L745_ARATH	F4JWQ4_ARATH
biological_process	GO:0000132	establishment of mitotic spindle orientation	2	3	0.666667	0.998392	0.0379791	1	1	Q6NQ74_ARATH	Q9M2F2_ARATH
biological_process	GO:0042791	5S class rRNA transcription by RNA polymerase III	2	4	0.5	0.994132	0.0700901	1	1	Q94HW6_ARATH	F4I7J9_ARATH
molecular_function	GO:0004046	aminoacylase activity	2	4	0.5	0.994038	0.0707898	1	1	Q8S9L3_ARATH	F4JTK8_ARATH
molecular_function	GO:0050080	malonyl-CoA decarboxylase activity	2	2	1	1	0.0138818	1	1	Q7Y1Z8_ARATH	F4JGB9_ARATH
molecular_function	GO:0004000	adenosine deaminase activity	2	3	0.666667	0.99994	0.000931741	1	0.459	A0A178W929_ARATH	A0A178W782_ARATH
biological_process	GO:0009913	epidermal cell differentiation	1	6	0.166667	0.968249	0.108672	1	1	PDF2_ARATH
biological_process	GO:0048268	clathrin coat assembly	1	19	0.0526316	0.329631	0.906488	1	1	CLC3_ARATH
biological_process	GO:0009086	methionine biosynthetic process	1	22	0.0454545	0.8506	0.260638	1	1	AKH2_ARATH
biological_process	GO:0019346	transsulfuration	1	11	0.0909091	0.624393	0.746307	1	1	MGL_ARATH
molecular_function	GO:0036430	CMP kinase activity	1	3	0.333333	0.961624	0.313507	1	1	KCY2_ARATH
molecular_function	GO:0036431	dCMP kinase activity	1	3	0.333333	0.961624	0.313507	1	1	KCY2_ARATH
molecular_function	GO:0046899	nucleoside triphosphate adenylate kinase activity	1	1	1	1	0.117839	1	1	KCY2_ARATH
molecular_function	GO:0033862	UMP kinase activity	1	8	0.125	0.758706	0.633296	1	1	KCY2_ARATH
biological_process	GO:0006207	'de novo' pyrimidine nucleobase biosynthetic process	1	10	0.1	0.669138	0.712607	1	1	KCY2_ARATH
biological_process	GO:0046033	AMP metabolic process	1	2	0.5	0.959242	0.129568	1	1	KCY2_ARATH
biological_process	GO:0006221	pyrimidine nucleotide biosynthetic process	1	4	0.25	0.240267	0.882596	1	1	KCY2_ARATH
biological_process	GO:0010375	stomatal complex patterning	1	11	0.0909091	0.891328	0.287044	1	1	TCX2_ARATH
molecular_function	GO:0000774	adenyl-nucleotide exchange factor activity	1	14	0.0714286	0.496048	0.827236	1	1	Q9LZL7_ARATH
molecular_function	GO:0051087	chaperone binding	1	50	0.02	0.0144759	0.998119	0.945	1	BAG6_ARATH
biological_process	GO:0009247	glycolipid biosynthetic process	1	12	0.0833333	0.0730799	0.964958	1	1	SCPDL_ARATH
biological_process	GO:0006002	fructose 6-phosphate metabolic process	1	15	0.0666667	0.461017	0.845968	1	1	GFAT1_ARATH
biological_process	GO:0010906	regulation of glucose metabolic process	1	2	0.5	0.962021	0.312026	1	1	REC1_ARATH
biological_process	GO:0009831	plant-type cell wall modification involved in multidimensional cell growth	1	5	0.2	0.89211	0.463867	1	1	Q9LSI1_ARATH
biological_process	GO:0009808	lignin metabolic process	1	11	0.0909091	0.0251735	0.991692	1	1	GXM3_ARATH
biological_process	GO:0006094	gluconeogenesis	1	28	0.0357143	0.130347	0.973158	1	1	GPMA2_ARATH
biological_process	GO:0045860	positive regulation of protein kinase activity	1	1	1	0.982255	0.0720167	1	1	PDPK1_ARATH
biological_process	GO:0009269	response to desiccation	1	17	0.0588235	0.391134	0.879983	1	1	MYC2_ARATH
biological_process	GO:0006006	glucose metabolic process	1	28	0.0357143	0.0623045	0.979524	1	1	AGLUP_ARATH
biological_process	GO:0008615	pyridoxine biosynthetic process	1	7	0.142857	0.806201	0.582206	1	1	PPOX1_ARATH
biological_process	GO:0009590	detection of gravity	1	3	0.333333	0.962021	0.312026	1	1	SHGR2_ARATH
molecular_function	GO:0019829	ATPase-coupled cation transmembrane transporter activity	1	17	0.0588235	0.152469	0.926864	1	1	ACA9_ARATH
biological_process	GO:0006817	phosphate ion transport	1	32	0.03125	0.0282648	0.995877	1	1	PHT21_ARATH
cellular_component	GO:0005689	U12-type spliceosomal complex	1	27	0.037037	0.180575	0.958856	1	1	U1165_ARATH
molecular_function	GO:0009931	calcium-dependent protein serine/threonine kinase activity	1	47	0.0212766	0.0199989	0.997257	0.978	1	CDPKT_ARATH
molecular_function	GO:0004683	calmodulin-dependent protein kinase activity	1	47	0.0212766	0.0199989	0.997257	0.978	1	CDPKT_ARATH
cellular_component	GO:0005747	mitochondrial respiratory chain complex I	1	69	0.0144928	0.0027626	0.999715	0.197	1	NDUAC_ARATH
molecular_function	GO:0042299	lupeol synthase activity	1	4	0.25	0.92921	0.394413	1	1	PEN6_ARATH
biological_process	GO:0009629	response to gravity	1	5	0.2	0.363219	0.741565	1	1	MYB88_ARATH
molecular_function	GO:0031559	oxidosqualene cyclase activity	1	1	1	0.793606	0.395746	1	1	PEN6_ARATH
molecular_function	GO:0044877	protein-containing complex binding	1	13	0.0769231	1	1.84259e-07	1	0	NUF2_ARATH
molecular_function	GO:0004383	guanylate cyclase activity	1	5	0.2	0.891082	0.465786	1	1	GSXL7_ARATH
molecular_function	GO:0001653	peptide receptor activity	1	17	0.0588235	0.388039	0.881426	1	1	BAME3_ARATH
molecular_function	GO:0042277	peptide binding	1	12	0.0833333	0.451761	0.668625	1	1	BAME3_ARATH
cellular_component	GO:0034271	phosphatidylinositol 3-kinase complex, class III, type I	1	3	0.333333	0.965545	0.298362	1	1	BECN1_ARATH
cellular_component	GO:0034272	phosphatidylinositol 3-kinase complex, class III, type II	1	3	0.333333	0.965545	0.298362	1	1	BECN1_ARATH
molecular_function	GO:0052742	phosphatidylinositol kinase activity	1	4	0.25	0.326605	0.907742	1	1	P4KA1_ARATH
biological_process	GO:0030242	autophagy of peroxisome	1	5	0.2	0.89211	0.463867	1	1	ATG11_ARATH
cellular_component	GO:0031359	integral component of chloroplast outer membrane	1	18	0.0555556	0.388486	0.880771	1	1	OEP37_ARATH
molecular_function	GO:0070273	phosphatidylinositol-4-phosphate binding	1	5	0.2	0.891082	0.465786	1	1	P4KA1_ARATH
biological_process	GO:0010020	chloroplast fission	1	25	0.04	0.191206	0.955775	1	1	CDP1_ARATH
molecular_function	GO:0004359	glutaminase activity	1	3	0.333333	0.961624	0.313507	1	1	NADE_ARATH
biological_process	GO:0070481	nuclear-transcribed mRNA catabolic process, non-stop decay	1	3	0.333333	0.962021	0.312026	1	1	F4KI84_ARATH
biological_process	GO:0009657	plastid organization	1	11	0.0909091	0.419734	0.646928	1	1	ABI3_ARATH
biological_process	GO:0045727	positive regulation of translation	1	11	0.0909091	0.158138	0.965545	1	1	RENT3_ARATH
biological_process	GO:0046685	response to arsenic-containing substance	1	15	0.0666667	0.425026	0.864035	1	1	PHYA_ARATH
biological_process	GO:0009061	anaerobic respiration	1	9	0.111111	0.714754	0.674433	1	1	Q93WK6_ARATH
biological_process	GO:1901371	regulation of leaf morphogenesis	1	23	0.0434783	0.23031	0.943235	1	1	TIF4B_ARATH
biological_process	GO:1901698	response to nitrogen compound	1	6	0.166667	0.9814	0.0293932	1	1	NRG2_ARATH
biological_process	GO:0010037	response to carbon dioxide	1	10	0.1	0.870432	0.320789	1	1	CRSP_ARATH
cellular_component	GO:0000327	lytic vacuole within protein storage vacuole	1	1	1	1	0.111399	1	1	PDI11_ARATH
cellular_component	GO:0000326	protein storage vacuole	1	17	0.0588235	0.750315	0.480474	1	1	PDI11_ARATH
biological_process	GO:0010201	response to continuous far red light stimulus by the high-irradiance response system	1	2	0.5	0.986268	0.220677	1	1	PHYA_ARATH
biological_process	GO:0010203	response to very low fluence red light stimulus	1	1	1	1	0.117204	1	1	PHYA_ARATH
molecular_function	GO:0031517	red light photoreceptor activity	1	1	1	1	0.117839	1	1	PHYB_ARATH
biological_process	GO:0009687	abscisic acid metabolic process	1	8	0.125	0.97575	0.0611893	1	1	PHYB_ARATH
biological_process	GO:0010617	circadian regulation of calcium ion oscillation	1	3	0.333333	0.962021	0.312026	1	1	PHYB_ARATH
biological_process	GO:0017012	protein-phytochromobilin linkage	1	1	1	1	0.117204	1	1	PHYB_ARATH
biological_process	GO:0010202	response to low fluence red light stimulus	1	2	0.5	0.986268	0.220677	1	1	PHYB_ARATH
biological_process	GO:0009266	response to temperature stimulus	1	27	0.037037	0.185738	0.846545	1	1	PHYB_ARATH
biological_process	GO:0010148	transpiration	1	6	0.166667	0.850395	0.526719	1	1	PHYB_ARATH
biological_process	GO:0010189	vitamin E biosynthetic process	1	8	0.125	0.841657	0.41906	1	1	TAT2_ARATH
cellular_component	GO:0071944	cell periphery	1	25	0.04	0.0481967	0.957412	0.995	1	ATP1_ARATH
molecular_function	GO:0102549	1-18:1-2-16:0-monogalactosyldiacylglycerol lipase activity	1	4	0.25	0.92921	0.394413	1	1	PLA12_ARATH
molecular_function	GO:0052740	1-acyl-2-lysophosphatidylserine acylhydrolase activity	1	6	0.166667	0.849035	0.52875	1	1	PLA12_ARATH
molecular_function	GO:0047714	galactolipase activity	1	10	0.1	0.666669	0.714655	1	1	PLA12_ARATH
molecular_function	GO:0052739	phosphatidylserine 1-acylhydrolase activity	1	6	0.166667	0.849035	0.52875	1	1	PLA12_ARATH
biological_process	GO:0031349	positive regulation of defense response	1	9	0.111111	0.654001	0.461199	1	1	MED25_ARATH
molecular_function	GO:0004366	glycerol-3-phosphate O-acyltransferase activity	1	8	0.125	0.758706	0.633296	1	1	GPAT3_ARATH
molecular_function	GO:0102420	sn-1-glycerol-3-phosphate C16:0-DCA-CoA acyl transferase activity	1	8	0.125	0.758706	0.633296	1	1	GPAT3_ARATH
cellular_component	GO:0032389	MutLalpha complex	1	2	0.5	0.987594	0.210393	1	1	MLH1_ARATH
biological_process	GO:0055075	potassium ion homeostasis	1	12	0.0833333	0.359345	0.894061	1	1	GSO1_ARATH
biological_process	GO:0009648	photoperiodism	1	9	0.111111	0.81145	0.262159	1	1	FD_ARATH
molecular_function	GO:0008408	3'-5' exonuclease activity	1	35	0.0285714	0.0999465	0.952453	1	1	F4I526_ARATH
biological_process	GO:0009231	riboflavin biosynthetic process	1	17	0.0588235	0.391134	0.879983	1	1	PYRP2_ARATH
cellular_component	GO:0022627	cytosolic small ribosomal subunit	1	97	0.0103093	0.000136545	0.99999	0.009	1	RPS1_ARATH
cellular_component	GO:0042788	polysomal ribosome	1	97	0.0103093	0.000136545	0.99999	0.009	1	PSA6B_ARATH
cellular_component	GO:0031080	nuclear pore outer ring	1	7	0.142857	0.821388	0.562578	1	1	NU133_ARATH
biological_process	GO:0090114	COPII-coated vesicle budding	1	4	0.25	0.999879	0.000612525	1	0.486	Q8VXX0_ARATH
molecular_function	GO:0004648	O-phospho-L-serine:2-oxoglutarate aminotransferase activity	1	2	0.5	0.986118	0.221797	1	1	SERB1_ARATH
biological_process	GO:0006564	L-serine biosynthetic process	1	7	0.142857	0.806201	0.582206	1	1	SERB1_ARATH
molecular_function	GO:0005102	signaling receptor binding	1	14	0.0714286	7.7392e-06	0.999999	0	1	PEX14_ARATH
cellular_component	GO:0000243	commitment complex	1	12	0.0833333	0.606967	0.757711	1	1	PR39B_ARATH
cellular_component	GO:0034715	pICln-Sm protein complex	1	6	0.166667	0.862641	0.507726	1	1	ICLN_ARATH
biological_process	GO:0009690	cytokinin metabolic process	1	19	0.0526316	0.006252	0.999283	0.926	1	RGLG2_ARATH
biological_process	GO:0007017	microtubule-based process	1	26	0.0384615	1	1.50837e-21	1	0	IQD5_ARATH
biological_process	GO:0006465	signal peptide processing	1	30	0.0333333	0.118204	0.976308	1	1	SIPL1_ARATH
biological_process	GO:0010372	positive regulation of gibberellin biosynthetic process	1	3	0.333333	0.962021	0.312026	1	1	DOF25_ARATH
molecular_function	GO:0008047	enzyme activator activity	1	16	0.0625	0.980489	0.0301486	1	1	DCP1_ARATH
biological_process	GO:0010255	glucose mediated signaling pathway	1	5	0.2	0.760682	0.63119	1	1	F4HRC9_ARATH
biological_process	GO:0030835	negative regulation of actin filament depolymerization	1	4	0.25	0.999481	0.0029623	1	0.969	F4ILN8_ARATH
biological_process	GO:1902600	proton transmembrane transport	1	26	0.0384615	0.0314923	0.988148	1	1	F4JHE9_ARATH
biological_process	GO:0007186	G protein-coupled receptor signaling pathway	1	12	0.0833333	0.608334	0.628187	1	1	VCR_ARATH
biological_process	GO:0071365	cellular response to auxin stimulus	1	21	0.047619	0.833328	0.213821	1	1	VCS_ARATH
biological_process	GO:0010071	root meristem specification	1	5	0.2	0.89211	0.463867	1	1	VCS_ARATH
cellular_component	GO:0046930	pore complex	1	16	0.0625	0.454156	0.848977	1	1	OEP37_ARATH
molecular_function	GO:0015288	porin activity	1	17	0.0588235	0.388039	0.881426	1	1	OEP37_ARATH
biological_process	GO:0009411	response to UV	1	20	0.05	0.616246	0.496331	1	1	F4HTM5_ARATH
biological_process	GO:0010028	xanthophyll cycle	1	3	0.333333	0.962021	0.312026	1	1	ANTR2_ARATH
biological_process	GO:0007035	vacuolar acidification	1	7	0.142857	0.806201	0.582206	1	1	F4IJ68_ARATH
cellular_component	GO:0030173	integral component of Golgi membrane	1	36	0.0277778	0.0783457	0.985808	1	1	UTR5B_ARATH
molecular_function	GO:0046964	3'-phosphoadenosine 5'-phosphosulfate transmembrane transporter activity	1	2	0.5	0.986118	0.221797	1	1	UTR5B_ARATH
molecular_function	GO:0046961	proton-transporting ATPase activity, rotational mechanism	1	16	0.0625	0.421929	0.865575	1	1	ATPA_ARATH
biological_process	GO:0010213	non-photoreactive DNA repair	1	2	0.5	0.986268	0.220677	1	1	ERCC1_ARATH
biological_process	GO:0032447	protein urmylation	1	5	0.2	0.89211	0.463867	1	1	CTU2_ARATH
biological_process	GO:0034227	tRNA thio-modification	1	7	0.142857	0.669138	0.712607	1	1	CTU2_ARATH
biological_process	GO:0002098	tRNA wobble uridine modification	1	20	0.05	0.425572	0.808794	1	1	KTI12_ARATH
biological_process	GO:0009116	nucleoside metabolic process	1	40	0.025	0.0296177	0.990011	1	1	AHK3_ARATH
molecular_function	GO:0008460	dTDP-glucose 4,6-dehydratase activity	1	5	0.2	0.891082	0.465786	1	1	RHM1_ARATH
biological_process	GO:0045492	xylan biosynthetic process	1	36	0.0277778	0.115533	0.965124	1	1	GXM3_ARATH
molecular_function	GO:0050265	RNA uridylyltransferase activity	1	2	0.5	0.986118	0.221797	1	1	HESO1_ARATH
biological_process	GO:1900369	negative regulation of RNA interference	1	3	0.333333	0.962021	0.312026	1	1	CPL3_ARATH
biological_process	GO:0060964	regulation of gene silencing by miRNA	1	3	0.333333	0.669138	0.712607	1	1	HESO1_ARATH
biological_process	GO:0071076	RNA 3' uridylation	1	2	0.5	0.986268	0.220677	1	1	HESO1_ARATH
molecular_function	GO:0046933	proton-transporting ATP synthase activity, rotational mechanism	1	26	0.0384615	0.171581	0.961676	1	1	ATPA_ARATH
cellular_component	GO:0005795	Golgi stack	1	12	0.0833333	0.36995	0.708755	1	1	MAG5_ARATH
molecular_function	GO:0003977	UDP-N-acetylglucosamine diphosphorylase activity	1	5	0.2	0.891082	0.465786	1	1	UGPA3_ARATH
molecular_function	GO:0003983	UTP:glucose-1-phosphate uridylyltransferase activity	1	10	0.1	0.666669	0.714655	1	1	UGPA3_ARATH
biological_process	GO:0006011	UDP-glucose metabolic process	1	10	0.1	0.669138	0.712607	1	1	UGPA3_ARATH
biological_process	GO:0015996	chlorophyll catabolic process	1	18	0.0555556	0.719726	0.516055	1	1	PAO_ARATH
biological_process	GO:0035435	phosphate ion transmembrane transport	1	11	0.0909091	0.461017	0.845968	1	1	PHT21_ARATH
cellular_component	GO:0000794	condensed nuclear chromosome	1	9	0.111111	0.999287	0.00333718	1	0.589	ASY1_ARATH
biological_process	GO:0000710	meiotic mismatch repair	1	5	0.2	0.89211	0.463867	1	1	ERCC1_ARATH
cellular_component	GO:0005677	chromatin silencing complex	1	9	0.111111	0.735181	0.654633	1	1	VIN3_ARATH
biological_process	GO:0031507	heterochromatin assembly	1	19	0.0526316	0.689987	0.478026	1	1	FAS1_ARATH
biological_process	GO:0035999	tetrahydrofolate interconversion	1	17	0.0588235	0.391134	0.879983	1	1	FTHS_ARATH
biological_process	GO:0016444	somatic cell DNA recombination	1	9	0.111111	0.714754	0.674433	1	1	F4J277_ARATH
biological_process	GO:0006734	NADH metabolic process	1	7	0.142857	0.909258	0.226436	1	1	PPOX1_ARATH
biological_process	GO:0006739	NADP metabolic process	1	5	0.2	0.170324	0.931555	1	1	PPOX1_ARATH
molecular_function	GO:0048038	quinone binding	1	36	0.0277778	0.0378054	0.994172	1	1	F4IAX1_ARATH
biological_process	GO:0019684	photosynthesis, light reaction	1	17	0.0588235	0.00130652	0.99955	0.405	1	DAPB3_ARATH
biological_process	GO:0031425	chloroplast RNA processing	1	14	0.0714286	0.45421	0.790044	1	1	CP33_ARATH
biological_process	GO:0052542	defense response by callose deposition	1	10	0.1	0.322937	0.869653	1	1	RBOHF_ARATH
biological_process	GO:0010337	regulation of salicylic acid metabolic process	1	8	0.125	0.989573	0.0367023	1	1	CDR1_ARATH
molecular_function	GO:0003727	single-stranded RNA binding	1	31	0.0322581	0.84644	0.242318	1	1	PUM5_ARATH
biological_process	GO:0000291	nuclear-transcribed mRNA catabolic process, exonucleolytic	1	2	0.5	0.608334	0.628187	1	1	XRN4_ARATH
biological_process	GO:0006090	pyruvate metabolic process	1	7	0.142857	0.0104342	0.996545	0.986	1	MAOP4_ARATH
cellular_component	GO:0098857	membrane microdomain	1	2	0.5	0.988392	0.098673	1	1	P4KA1_ARATH
biological_process	GO:0010078	maintenance of root meristem identity	1	43	0.0232558	0.031403	0.995328	1	1	BAME3_ARATH
biological_process	GO:0009880	embryonic pattern specification	1	13	0.0769231	0.398093	0.826034	1	1	GNOM_ARATH
cellular_component	GO:0042645	mitochondrial nucleoid	1	8	0.125	0.778618	0.611321	1	1	OSB3_ARATH
cellular_component	GO:0009295	nucleoid	1	6	0.166667	0.0231113	0.994817	0.91	1	OSB3_ARATH
biological_process	GO:0006264	mitochondrial DNA replication	1	10	0.1	0.669138	0.712607	1	1	OSB3_ARATH
biological_process	GO:0000002	mitochondrial genome maintenance	1	4	0.25	0.89211	0.463867	1	1	RECAM_ARATH
biological_process	GO:0051096	positive regulation of helicase activity	1	7	0.142857	0.806201	0.582206	1	1	OSB3_ARATH
molecular_function	GO:0031418	L-ascorbic acid binding	1	46	0.0217391	0.0222589	0.99689	0.981	1	P4H6_ARATH
molecular_function	GO:0004656	procollagen-proline 4-dioxygenase activity	1	18	0.0555556	0.356274	0.895408	1	1	P4H6_ARATH
biological_process	GO:0018401	peptidyl-proline hydroxylation to 4-hydroxy-L-proline	1	14	0.0714286	0.499068	0.825503	1	1	P4H6_ARATH
biological_process	GO:0050777	negative regulation of immune response	1	3	0.333333	0.863085	0.243524	1	1	PUB13_ARATH
molecular_function	GO:0004722	protein serine/threonine phosphatase activity	1	46	0.0217391	0.0135887	0.993636	0.931	1	PPP7I_ARATH
cellular_component	GO:0005849	mRNA cleavage factor complex	1	8	0.125	0.989214	0.0424123	1	1	PCFS4_ARATH
biological_process	GO:0006379	mRNA cleavage	1	9	0.111111	0.975901	0.0894413	1	1	PCFS4_ARATH
biological_process	GO:0006369	termination of RNA polymerase II transcription	1	6	0.166667	0.850395	0.526719	1	1	PCFS4_ARATH
molecular_function	GO:1901149	salicylic acid binding	1	28	0.0357143	0.141472	0.970185	1	1	2AAA_ARATH
cellular_component	GO:0030690	Noc1p-Noc2p complex	1	2	0.5	0.987594	0.210393	1	1	RBLOT_ARATH
cellular_component	GO:0030691	Noc2p-Noc3p complex	1	2	0.5	0.987594	0.210393	1	1	RBLOT_ARATH
biological_process	GO:0042273	ribosomal large subunit biogenesis	1	25	0.04	0.0326197	0.98669	1	1	RBLOT_ARATH
biological_process	GO:0009853	photorespiration	1	53	0.0188679	0.00131813	0.999876	0.412	1	GLTB1_ARATH
biological_process	GO:0051865	protein autoubiquitination	1	18	0.0555556	0.359345	0.894061	1	1	PUB10_ARATH
biological_process	GO:0050665	hydrogen peroxide biosynthetic process	1	9	0.111111	0.499068	0.825503	1	1	RBOHF_ARATH
biological_process	GO:0002679	respiratory burst involved in defense response	1	4	0.25	0.92991	0.392671	1	1	RBOHF_ARATH
cellular_component	GO:0022625	cytosolic large ribosomal subunit	1	145	0.00689655	6.68113e-07	1	0	1	F4JPA3_ARATH
biological_process	GO:1990428	miRNA transport	1	5	0.2	0.850395	0.526719	1	1	THOC2_ARATH
biological_process	GO:0080140	regulation of jasmonic acid metabolic process	1	1	1	0.96088	0.193799	1	1	RBL11_ARATH
biological_process	GO:0000082	G1/S transition of mitotic cell cycle	1	8	0.125	0.760682	0.63119	1	1	DPB_ARATH
biological_process	GO:0048229	gametophyte development	1	21	0.047619	0.964592	0.0476339	1	1	GACP2_ARATH
biological_process	GO:0010377	guard cell fate commitment	1	2	0.5	0.986268	0.220677	1	1	FAMA_ARATH
biological_process	GO:0001558	regulation of cell growth	1	13	0.0769231	0.924356	0.119965	1	1	SIK1_ARATH
biological_process	GO:0110102	ribulose bisphosphate carboxylase complex assembly	1	10	0.1	0.669138	0.712607	1	1	ATP1_ARATH
biological_process	GO:0030865	cortical cytoskeleton organization	1	15	0.0666667	0.435085	0.719825	1	1	TON2_ARATH
cellular_component	GO:0031461	cullin-RING ubiquitin ligase complex	1	12	0.0833333	0.800168	0.26255	1	1	DET1_ARATH
biological_process	GO:0016246	RNA interference	1	3	0.333333	0.999801	0.000672702	1	0.502	PRP16_ARATH
biological_process	GO:0009616	RNAi-mediated antiviral immune response	1	9	0.111111	0.968475	0.129507	1	1	AGO1_ARATH
cellular_component	GO:0030427	site of polarized growth	1	2	0.5	0.989673	0.0361968	1	1	F4KB73_ARATH
biological_process	GO:0048766	root hair initiation	1	19	0.0526316	0.329631	0.906488	1	1	RHL1_ARATH
biological_process	GO:0042793	plastid transcription	1	12	0.0833333	0.58094	0.776057	1	1	PP451_ARATH
cellular_component	GO:0030659	cytoplasmic vesicle membrane	1	23	0.0434783	0.974809	0.0435196	1	1	ZDH22_ARATH
biological_process	GO:0002181	cytoplasmic translation	1	49	0.0204082	0.0755204	0.961966	1	1	C3H21_ARATH
biological_process	GO:0000027	ribosomal large subunit assembly	1	28	0.0357143	0.130347	0.973158	1	1	F4KFX1_ARATH
cellular_component	GO:0000839	Hrd1p ubiquitin ligase ERAD-L complex	1	4	0.25	0.936153	0.376533	1	1	RBL15_ARATH
molecular_function	GO:1990381	ubiquitin-specific protease binding	1	4	0.25	0.92921	0.394413	1	1	RBL15_ARATH
biological_process	GO:0010074	maintenance of meristem identity	1	10	0.1	0.61704	0.523254	1	1	F4IIV5_ARATH
molecular_function	GO:0017151	DEAD/H-box RNA helicase binding	1	2	0.5	0.986118	0.221797	1	1	RH1_ARATH
cellular_component	GO:0000311	plastid large ribosomal subunit	1	6	0.166667	0.862641	0.507726	1	1	RK4_ARATH
molecular_function	GO:0016251	RNA polymerase II general transcription initiation factor activity	1	11	0.0909091	0.621732	0.748293	1	1	TAF1B_ARATH
molecular_function	GO:0016846	carbon-sulfur lyase activity	1	11	0.0909091	0.186627	0.936481	1	1	MGL_ARATH
molecular_function	GO:0004838	L-tyrosine:2-oxoglutarate aminotransferase activity	1	5	0.2	0.891082	0.465786	1	1	TAT2_ARATH
biological_process	GO:0009641	shade avoidance	1	17	0.0588235	0.514699	0.747635	1	1	PIL1_ARATH
cellular_component	GO:0030140	trans-Golgi network transport vesicle	1	3	0.333333	0.707495	0.579622	1	1	SYP21_ARATH
cellular_component	GO:0009526	plastid envelope	1	8	0.125	0.00643809	0.995262	0.457	1	SCY2_ARATH
cellular_component	GO:0042651	thylakoid membrane	1	28	0.0357143	0.000246673	0.999873	0.016	1	KEA3_ARATH
biological_process	GO:0010206	photosystem II repair	1	16	0.0625	0.425026	0.864035	1	1	FTSH1_ARATH
biological_process	GO:0043001	Golgi to plasma membrane protein transport	1	6	0.166667	0.850395	0.526719	1	1	BIG2_ARATH
cellular_component	GO:0005750	mitochondrial respiratory chain complex III	1	21	0.047619	0.30401	0.916367	1	1	UCRI2_ARATH
biological_process	GO:0015693	magnesium ion transport	1	25	0.04	0.191206	0.955775	1	1	NIPA6_ARATH
biological_process	GO:0009646	response to absence of light	1	40	0.025	0.183019	0.925188	1	1	ATB52_ARATH
biological_process	GO:0070482	response to oxygen levels	1	1	1	0.0491248	0.968652	1	1	NAR1_ARATH
biological_process	GO:0009446	putrescine biosynthetic process	1	5	0.2	0.94276	0.239318	1	1	SPE2_ARATH
cellular_component	GO:0044614	nuclear pore cytoplasmic filaments	1	5	0.2	0.901327	0.445998	1	1	NU98B_ARATH
biological_process	GO:0000973	posttranscriptional tethering of RNA polymerase II gene DNA at nuclear periphery	1	5	0.2	0.89211	0.463867	1	1	NU98B_ARATH
biological_process	GO:0016558	protein import into peroxisome matrix	1	9	0.111111	0.956999	0.158343	1	1	PEX6_ARATH
biological_process	GO:0010431	seed maturation	1	32	0.03125	0.772253	0.333918	1	1	PKP1_ARATH
molecular_function	GO:0004435	phosphatidylinositol phospholipase C activity	1	12	0.0833333	0.578124	0.777967	1	1	PLCD4_ARATH
biological_process	GO:0048437	floral organ development	1	11	0.0909091	0.725811	0.341717	1	1	BAME3_ARATH
biological_process	GO:0015846	polyamine transport	1	7	0.142857	0.806201	0.582206	1	1	AB28G_ARATH
biological_process	GO:0016311	dephosphorylation	1	11	0.0909091	0.231589	0.832365	1	1	PTN2B_ARATH
molecular_function	GO:0008146	sulfotransferase activity	1	23	0.0434783	0.45037	0.792649	1	1	SOT16_ARATH
biological_process	GO:0051923	sulfation	1	17	0.0588235	0.391134	0.879983	1	1	SOT16_ARATH
cellular_component	GO:0005697	telomerase holoenzyme complex	1	2	0.5	0.936153	0.376533	1	1	SMG7_ARATH
molecular_function	GO:0070034	telomerase RNA binding	1	4	0.25	0.92921	0.394413	1	1	SMG7_ARATH
molecular_function	GO:0042162	telomeric DNA binding	1	17	0.0588235	0.861658	0.266076	1	1	SMG7_ARATH
biological_process	GO:0006265	DNA topological change	1	22	0.0454545	0.252365	0.93569	1	1	TOP3A_ARATH
molecular_function	GO:0052689	carboxylic ester hydrolase activity	1	31	0.0322581	0.00317484	0.998421	0.443	1	PME53_ARATH
biological_process	GO:0007568	aging	1	12	0.0833333	0.977581	0.0365033	1	1	SAG12_ARATH
biological_process	GO:0060866	leaf abscission	1	8	0.125	0.760682	0.63119	1	1	RLK5_ARATH
biological_process	GO:1902290	positive regulation of defense response to oomycetes	1	10	0.1	0.669138	0.712607	1	1	MORC6_ARATH
biological_process	GO:1900057	positive regulation of leaf senescence	1	18	0.0555556	0.359345	0.894061	1	1	DA1_ARATH
biological_process	GO:0010376	stomatal complex formation	1	5	0.2	0.89211	0.463867	1	1	MYB88_ARATH
cellular_component	GO:0005801	cis-Golgi network	1	13	0.0769231	0.489793	0.830032	1	1	GOS12_ARATH
molecular_function	GO:0009975	cyclase activity	1	24	0.0416667	0.11327	0.965968	1	1	TPS05_ARATH
biological_process	GO:0051762	sesquiterpene biosynthetic process	1	25	0.04	0.191206	0.955775	1	1	TPS05_ARATH
biological_process	GO:0016114	terpenoid biosynthetic process	1	21	0.047619	0.158946	0.892097	1	1	LINS_ARATH
biological_process	GO:0009558	embryo sac cellularization	1	5	0.2	0.89211	0.463867	1	1	GFA2_ARATH
molecular_function	GO:0004175	endopeptidase activity	1	16	0.0625	0.610994	0.44384	1	1	APA1_ARATH
biological_process	GO:0080027	response to herbivore	1	18	0.0555556	0.359345	0.894061	1	1	PRB1_ARATH
cellular_component	GO:0031972	chloroplast intermembrane space	1	6	0.166667	0.862641	0.507726	1	1	TI236_ARATH
cellular_component	GO:0031897	Tic complex	1	3	0.333333	0.965545	0.298362	1	1	TIC40_ARATH
molecular_function	GO:0010277	chlorophyllide a oxygenase [overall] activity	1	5	0.2	0.891082	0.465786	1	1	PAO_ARATH
cellular_component	GO:0098807	chloroplast thylakoid membrane protein complex	1	6	0.166667	0.330336	0.905873	1	1	STR4_ARATH
molecular_function	GO:0000340	RNA 7-methylguanosine cap binding	1	6	0.166667	0.849035	0.52875	1	1	PIR_ARATH
biological_process	GO:0048232	male gamete generation	1	4	0.25	0.9954	0.0110274	1	1	SC24A_ARATH
molecular_function	GO:0047274	galactinol-sucrose galactosyltransferase activity	1	7	0.142857	0.804521	0.584296	1	1	F4J3E6_ARATH
cellular_component	GO:0019897	extrinsic component of plasma membrane	1	8	0.125	0.490674	0.727561	1	1	RIN4_ARATH
biological_process	GO:0002758	innate immune response-activating signal transduction	1	25	0.04	0.107115	0.979089	1	1	RIN4_ARATH
molecular_function	GO:0030275	LRR domain binding	1	2	0.5	0.986118	0.221797	1	1	RPP4_ARATH
cellular_component	GO:0015935	small ribosomal subunit	1	30	0.0333333	2.26681e-05	0.999997	0	1	RR20_ARATH
molecular_function	GO:0030374	nuclear receptor coactivator activity	1	1	1	1	0.117839	1	1	RSA1_ARATH
biological_process	GO:0055078	sodium ion homeostasis	1	4	0.25	0.760682	0.63119	1	1	RSA1_ARATH
biological_process	GO:0000741	karyogamy	1	9	0.111111	0.526207	0.699648	1	1	SSRP1_ARATH
biological_process	GO:0043007	maintenance of rDNA	1	3	0.333333	0.962021	0.312026	1	1	RTEL1_ARATH
biological_process	GO:0070716	mismatch repair involved in maintenance of fidelity involved in DNA-dependent DNA replication	1	1	1	1	0.117204	1	1	RTEL1_ARATH
biological_process	GO:1904430	negative regulation of t-circle formation	1	1	1	1	0.117204	1	1	RTEL1_ARATH
biological_process	GO:0090657	telomeric loop disassembly	1	1	1	1	0.117204	1	1	RTEL1_ARATH
biological_process	GO:0045116	protein neddylation	1	13	0.0769231	0.539091	0.802319	1	1	AXL1_ARATH
biological_process	GO:2001020	regulation of response to DNA damage stimulus	1	3	0.333333	0.966623	0.0840997	1	1	ATM_ARATH
biological_process	GO:0007349	cellularization	1	1	1	0.991081	0.0572398	1	1	RUK_ARATH
biological_process	GO:0010245	radial microtubular system formation	1	2	0.5	0.986268	0.220677	1	1	RUK_ARATH
biological_process	GO:0010015	root morphogenesis	1	23	0.0434783	0.57594	0.491421	1	1	F4KIH9_ARATH
molecular_function	GO:0045549	9-cis-epoxycarotenoid dioxygenase activity	1	7	0.142857	0.804521	0.584296	1	1	NCED9_ARATH
molecular_function	GO:0010436	carotenoid dioxygenase activity	1	9	0.111111	0.712514	0.676522	1	1	NCED9_ARATH
biological_process	GO:0016121	carotene catabolic process	1	10	0.1	0.669138	0.712607	1	1	NCED9_ARATH
biological_process	GO:0010112	regulation of systemic acquired resistance	1	13	0.0769231	0.483945	0.76969	1	1	SARD1_ARATH
biological_process	GO:0006414	translational elongation	1	22	0.0454545	0.0623045	0.979524	1	1	EF2_ARATH
biological_process	GO:0009902	chloroplast relocation	1	6	0.166667	0.954084	0.108159	1	1	PMIR1_ARATH
molecular_function	GO:0009673	low-affinity phosphate transmembrane transporter activity	1	1	1	1	0.117839	1	1	PHT21_ARATH
biological_process	GO:0030163	protein catabolic process	1	33	0.030303	0.910492	0.109645	1	1	FTSH5_ARATH
biological_process	GO:0031540	regulation of anthocyanin biosynthetic process	1	12	0.0833333	0.461017	0.845968	1	1	TCP15_ARATH
biological_process	GO:0009647	skotomorphogenesis	1	5	0.2	0.89211	0.463867	1	1	AHL22_ARATH
biological_process	GO:0010039	response to iron ion	1	23	0.0434783	0.209956	0.949896	1	1	BTSL1_ARATH
biological_process	GO:0010363	regulation of plant-type hypersensitive response	1	4	0.25	0.992106	0.0295363	1	1	ASHH2_ARATH
cellular_component	GO:0055037	recycling endosome	1	4	0.25	0.691756	0.693121	1	1	VPS51_ARATH
molecular_function	GO:0003917	DNA topoisomerase type I (single strand cut, ATP-independent) activity	1	10	0.1	0.666669	0.714655	1	1	TOP3A_ARATH
molecular_function	GO:0030628	pre-mRNA 3'-splice site binding	1	11	0.0909091	0.621732	0.748293	1	1	Q9LZT6_ARATH
molecular_function	GO:0000386	second spliceosomal transesterification activity	1	3	0.333333	0.961624	0.313507	1	1	Q9LZT6_ARATH
molecular_function	GO:0035312	5'-3' exodeoxyribonuclease activity	1	8	0.125	0.942525	0.191055	1	1	F4IDZ7_ARATH
biological_process	GO:0031848	protection from non-homologous end joining at telomere	1	3	0.333333	0.962021	0.312026	1	1	F4IDZ7_ARATH
biological_process	GO:0046786	viral replication complex formation and maintenance	1	4	0.25	0.92991	0.392671	1	1	TOM2B_ARATH
molecular_function	GO:0004177	aminopeptidase activity	1	18	0.0555556	0.186627	0.936481	1	1	PSA_ARATH
molecular_function	GO:0008240	tripeptidyl-peptidase activity	1	2	0.5	0.986118	0.221797	1	1	CRSP_ARATH
cellular_component	GO:0030660	Golgi-associated vesicle membrane	1	5	0.2	0.900438	0.197262	1	1	SIPL1_ARATH
cellular_component	GO:0071458	integral component of cytoplasmic side of endoplasmic reticulum membrane	1	11	0.0909091	0.648879	0.727321	1	1	SIPL1_ARATH
cellular_component	GO:0071556	integral component of lumenal side of endoplasmic reticulum membrane	1	6	0.166667	0.862641	0.507726	1	1	SIPL1_ARATH
molecular_function	GO:0042500	aspartic endopeptidase activity, intramembrane cleaving	1	6	0.166667	0.849035	0.52875	1	1	SIPL1_ARATH
biological_process	GO:0005991	trehalose metabolic process	1	2	0.5	0.898295	0.225328	1	1	SWTIE_ARATH
biological_process	GO:0046506	sulfolipid biosynthetic process	1	3	0.333333	0.962021	0.312026	1	1	UGPA3_ARATH
molecular_function	GO:0046524	sucrose-phosphate synthase activity	1	6	0.166667	0.849035	0.52875	1	1	SPSA3_ARATH
biological_process	GO:0005986	sucrose biosynthetic process	1	18	0.0555556	0.359345	0.894061	1	1	SPSA3_ARATH
biological_process	GO:0010143	cutin biosynthetic process	1	18	0.0555556	0.45421	0.790044	1	1	GPAT3_ARATH
biological_process	GO:0010345	suberin biosynthetic process	1	22	0.0454545	0.252365	0.93569	1	1	AB11G_ARATH
molecular_function	GO:0034450	ubiquitin-ubiquitin ligase activity	1	4	0.25	0.92921	0.394413	1	1	UBE4_ARATH
biological_process	GO:0000413	protein peptidyl-prolyl isomerization	1	27	0.037037	0.158138	0.965545	1	1	CYP63_ARATH
biological_process	GO:0000463	maturation of LSU-rRNA from tricistronic rRNA transcript (SSU-rRNA, 5.8S rRNA, LSU-rRNA)	1	24	0.0416667	0.191206	0.955775	1	1	F4IBR2_ARATH
biological_process	GO:0002239	response to oomycetes	1	24	0.0416667	0.904241	0.15091	1	1	CMKMT_ARATH
cellular_component	GO:0009897	external side of plasma membrane	1	4	0.25	0.936153	0.376533	1	1	AB11G_ARATH
cellular_component	GO:0034245	mitochondrial DNA-directed RNA polymerase complex	1	3	0.333333	0.965545	0.298362	1	1	RPOT3_ARATH
biological_process	GO:0006390	mitochondrial transcription	1	3	0.333333	0.92991	0.392671	1	1	RPOT3_ARATH
biological_process	GO:0034427	nuclear-transcribed mRNA catabolic process, exonucleolytic, 3'-5'	1	13	0.0769231	0.779232	0.500932	1	1	SKI3_ARATH
biological_process	GO:0019748	secondary metabolic process	1	24	0.0416667	0.00354822	0.997968	0.765	1	MYB72_ARATH
molecular_function	GO:0016279	protein-lysine N-methyltransferase activity	1	18	0.0555556	0.674536	0.455771	1	1	Q93Z55_ARATH
cellular_component	GO:0042646	plastid nucleoid	1	8	0.125	0.0106985	0.998669	0.622	1	MFP1_ARATH
biological_process	GO:0045003	double-strand break repair via synthesis-dependent strand annealing	1	6	0.166667	0.760682	0.63119	1	1	SM3L2_ARATH
biological_process	GO:0010031	circumnutation	1	7	0.142857	0.806201	0.582206	1	1	ELF3_ARATH
cellular_component	GO:0009898	cytoplasmic side of plasma membrane	1	11	0.0909091	0.419623	0.780742	1	1	GACP3_ARATH
molecular_function	GO:0052866	phosphatidylinositol phosphate phosphatase activity	1	3	0.333333	0.902109	0.205502	1	1	PTN2B_ARATH
molecular_function	GO:0016314	phosphatidylinositol-3,4,5-trisphosphate 3-phosphatase activity	1	3	0.333333	0.961624	0.313507	1	1	PTN2B_ARATH
molecular_function	GO:0004725	protein tyrosine phosphatase activity	1	33	0.030303	0.0861781	0.984084	1	1	PTN2B_ARATH
molecular_function	GO:0008138	protein tyrosine/serine/threonine phosphatase activity	1	30	0.0333333	0.0952893	0.981955	1	1	PTN2B_ARATH
molecular_function	GO:0045156	electron transporter, transferring electrons within the cyclic electron transport pathway of photosynthesis activity	1	11	0.0909091	0.621732	0.748293	1	1	PSBD_ARATH
biological_process	GO:0033169	histone H3-K9 demethylation	1	9	0.111111	0.714754	0.674433	1	1	ELF6_ARATH
biological_process	GO:0035067	negative regulation of histone acetylation	1	7	0.142857	0.921429	0.285246	1	1	BRCA1_ARATH
cellular_component	GO:0034991	nuclear meiotic cohesin complex	1	5	0.2	0.901327	0.445998	1	1	SCC11_ARATH
cellular_component	GO:0034990	nuclear mitotic cohesin complex	1	6	0.166667	0.862641	0.507726	1	1	SCC11_ARATH
biological_process	GO:1990414	replication-born double-strand break repair via sister chromatid exchange	1	10	0.1	0.669138	0.712607	1	1	SCC11_ARATH
biological_process	GO:0007130	synaptonemal complex assembly	1	6	0.166667	0.806201	0.582206	1	1	SCC11_ARATH
molecular_function	GO:0047364	desulfoglucosinolate sulfotransferase activity	1	3	0.333333	0.961624	0.313507	1	1	SOT16_ARATH
biological_process	GO:0019761	glucosinolate biosynthetic process	1	29	0.0344828	0.789488	0.349566	1	1	SOT16_ARATH
biological_process	GO:0032260	response to jasmonic acid stimulus involved in jasmonic acid and ethylene-dependent systemic resistance	1	2	0.5	0.962021	0.312026	1	1	SOT16_ARATH
biological_process	GO:0048589	developmental growth	1	10	0.1	0.987151	0.0178382	1	1	CTF64_ARATH
biological_process	GO:1905392	plant organ morphogenesis	1	12	0.0833333	0.590583	0.465752	1	1	PARNL_ARATH
biological_process	GO:0090708	specification of plant organ axis polarity	1	16	0.0625	0.425026	0.864035	1	1	GSO1_ARATH
molecular_function	GO:0005471	ATP:ADP antiporter activity	1	11	0.0909091	0.621732	0.748293	1	1	ADT2_ARATH
cellular_component	GO:0009569	chloroplast starch grain	1	6	0.166667	0.862641	0.507726	1	1	ISOA3_ARATH
cellular_component	GO:0031588	nucleotide-activated protein kinase complex	1	8	0.125	0.778618	0.611321	1	1	PV42B_ARATH
biological_process	GO:0042149	cellular response to glucose starvation	1	6	0.166667	0.850395	0.526719	1	1	PV42B_ARATH
biological_process	GO:0043967	histone H4 acetylation	1	10	0.1	0.948842	0.151971	1	1	MBD9_ARATH
biological_process	GO:1901332	negative regulation of lateral root development	1	7	0.142857	0.806201	0.582206	1	1	ERF86_ARATH
molecular_function	GO:0016262	protein N-acetylglucosaminyltransferase activity	1	2	0.5	0.986118	0.221797	1	1	MGAT1_ARATH
biological_process	GO:0043484	regulation of RNA splicing	1	10	0.1	0.980718	0.0543966	1	1	SUA_ARATH
biological_process	GO:0034501	protein localization to kinetochore	1	2	0.5	0.986268	0.220677	1	1	MPS1_ARATH
biological_process	GO:0010019	chloroplast-nucleus signaling pathway	1	9	0.111111	0.714754	0.674433	1	1	PTM_ARATH
biological_process	GO:0010024	phytochromobilin biosynthetic process	1	5	0.2	0.89211	0.463867	1	1	F4IUM0_ARATH
biological_process	GO:0035825	homologous recombination	1	6	0.166667	0.997509	0.00619891	1	1	PDS5B_ARATH
biological_process	GO:0009395	phospholipid catabolic process	1	19	0.0526316	0.252365	0.93569	1	1	PLDZ1_ARATH
biological_process	GO:0048564	photosystem I assembly	1	18	0.0555556	0.359345	0.894061	1	1	FTSH5_ARATH
biological_process	GO:0055070	copper ion homeostasis	1	8	0.125	0.301943	0.917458	1	1	TPST_ARATH
biological_process	GO:0048441	petal development	1	13	0.0769231	0.391134	0.879983	1	1	LBD36_ARATH
biological_process	GO:0009636	response to toxic substance	1	19	0.0526316	1.70265e-08	1	0	1	AHK2_ARATH
molecular_function	GO:0016783	sulfurtransferase activity	1	2	0.5	0.891444	0.256246	1	1	CTU2_ARATH
molecular_function	GO:0016410	N-acyltransferase activity	1	15	0.0666667	0.959476	0.0703617	1	1	Q9LYQ7_ARATH
biological_process	GO:0008216	spermidine metabolic process	1	4	0.25	0.959242	0.129568	1	1	C98A9_ARATH
molecular_function	GO:0016464	chloroplast protein-transporting ATPase activity	1	12	0.0833333	0.578124	0.777967	1	1	YCF2_ARATH
biological_process	GO:0006616	SRP-dependent cotranslational protein targeting to membrane, translocation	1	11	0.0909091	0.624393	0.746307	1	1	SCY2_ARATH
biological_process	GO:0009686	gibberellin biosynthetic process	1	26	0.0384615	0.222014	0.920605	1	1	G2OX4_ARATH
biological_process	GO:0045454	cell redox homeostasis	1	41	0.0243902	0.0387166	0.994002	1	1	GASA4_ARATH
biological_process	GO:0043085	positive regulation of catalytic activity	1	15	0.0666667	0.820094	0.26776	1	1	DCP1_ARATH
biological_process	GO:0010380	regulation of chlorophyll biosynthetic process	1	16	0.0625	0.252365	0.93569	1	1	AB25B_ARATH
biological_process	GO:0010581	regulation of starch biosynthetic process	1	9	0.111111	0.714754	0.674433	1	1	MFP1_ARATH
biological_process	GO:0071485	cellular response to absence of light	1	2	0.5	0.986268	0.220677	1	1	GHR1_ARATH
biological_process	GO:0048440	carpel development	1	17	0.0588235	0.696063	0.432327	1	1	ATXR3_ARATH
cellular_component	GO:0009523	photosystem II	1	45	0.0222222	0.000770854	0.999931	0.055	1	PSBD_ARATH
molecular_function	GO:0016168	chlorophyll binding	1	40	0.025	0.0419788	0.993392	1	1	PSBD_ARATH
molecular_function	GO:0010242	oxygen evolving activity	1	5	0.2	0.891082	0.465786	1	1	PSBD_ARATH
cellular_component	GO:0061908	phagophore	1	7	0.142857	0.821388	0.562578	1	1	Q9S781_ARATH
molecular_function	GO:0016627	oxidoreductase activity, acting on the CH-CH group of donors	1	15	0.0666667	0.0363893	0.983223	1	1	IBR3_ARATH
biological_process	GO:0080119	ER body organization	1	4	0.25	0.92991	0.392671	1	1	SC24A_ARATH
cellular_component	GO:0033097	amyloplast membrane	1	1	1	1	0.111399	1	1	SCY2_ARATH
molecular_function	GO:0005048	signal sequence binding	1	5	0.2	0.902614	0.180001	1	1	SCY2_ARATH
biological_process	GO:0045038	protein import into chloroplast thylakoid membrane	1	4	0.25	0.92991	0.392671	1	1	TATB_ARATH
cellular_component	GO:0035658	Mon1-Ccz1 complex	1	5	0.2	0.901327	0.445998	1	1	F4J8L1_ARATH
cellular_component	GO:0000815	ESCRT III complex	1	13	0.0769231	0.566337	0.784715	1	1	VPS2A_ARATH
cellular_component	GO:0010330	cellulose synthase complex	1	7	0.142857	0.778618	0.611321	1	1	CSI3_ARATH
biological_process	GO:0009970	cellular response to sulfate starvation	1	14	0.0714286	0.499068	0.825503	1	1	MGL_ARATH
cellular_component	GO:0071540	eukaryotic translation initiation factor 3 complex, eIF3e	1	2	0.5	0.987594	0.210393	1	1	EIF3A_ARATH
cellular_component	GO:0071541	eukaryotic translation initiation factor 3 complex, eIF3m	1	7	0.142857	0.821388	0.562578	1	1	EIF3A_ARATH
cellular_component	GO:0043614	multi-eIF complex	1	3	0.333333	0.965545	0.298362	1	1	EIF3A_ARATH
biological_process	GO:0002188	translation reinitiation	1	2	0.5	0.986268	0.220677	1	1	EIF3A_ARATH
biological_process	GO:0055047	generative cell mitosis	1	3	0.333333	0.962021	0.312026	1	1	DUO1_ARATH
cellular_component	GO:0033186	CAF-1 complex	1	2	0.5	0.987594	0.210393	1	1	FAS1_ARATH
biological_process	GO:1905393	plant organ formation	1	5	0.2	0.84185	0.229504	1	1	BLH8_ARATH
molecular_function	GO:0042578	phosphoric ester hydrolase activity	1	7	0.142857	0.0231919	0.983541	0.983	1	DPNP2_ARATH
biological_process	GO:0000105	histidine biosynthetic process	1	17	0.0588235	0.391134	0.879983	1	1	HIS1A_ARATH
molecular_function	GO:0004563	beta-N-acetylhexosaminidase activity	1	3	0.333333	0.961624	0.313507	1	1	HEXO3_ARATH
molecular_function	GO:0015929	hexosaminidase activity	1	3	0.333333	0.92921	0.394413	1	1	HEXO3_ARATH
molecular_function	GO:0102148	N-acetyl-beta-D-galactosaminidase activity	1	3	0.333333	0.961624	0.313507	1	1	HEXO3_ARATH
biological_process	GO:0030203	glycosaminoglycan metabolic process	1	3	0.333333	0.806201	0.582206	1	1	HEXO3_ARATH
molecular_function	GO:0035251	UDP-glucosyltransferase activity	1	26	0.0384615	0.445808	0.64502	1	1	U73C7_ARATH
[truncated: 5,578 more rows]
[truncated: 952 more columns]

## Sheet: polyQ
GO domain	GO ID	GO term	polyQ protein	total number	number / total	raw p-value under-representation	raw p-value over-representation	FWER under-representation	FWER over-representation	Gene Name
cellular_component	GO:0005634	nucleus	578	6057	0.0954268	1	9.33226e-106	1	0	PHE1_ARATH	PHYD_ARATH	SOFL6_ARATH	MOM1_ARATH	NRPE1_ARATH	RBR1_ARATH	RH40_ARATH	RHC1A_ARATH	SCL4_ARATH	SMG7_ARATH	SEP1_ARATH	SLK3_ARATH	TIC_ARATH	PATH1_ARATH	SHR_ARATH	SLK1_ARATH	SPL8_ARATH	SM3L1_ARATH	SLK2_ARATH	STM_ARATH	CPL1_ARATH	LFY_ARATH	LSH1_ARATH	LSH2_ARATH	LSH7_ARATH	EIL1_ARATH	HFA1A_ARATH	HFA1B_ARATH	LRL1_ARATH	LRL2_ARATH	LRP1_ARATH	LNK2_ARATH	BLH9_ARATH	JGB_ARATH	AGL65_ARATH	BZP18_ARATH	C3H17_ARATH	CPSF_ARATH	HASTY_ARATH	HFA1E_ARATH
molecular_function	GO:0003700	DNA-binding transcription factor activity	308	1909	0.161341	1	1.07721e-102	1	0	PHE1_ARATH	SCL4_ARATH	SHR_ARATH	STM_ARATH	LFY_ARATH	EIL1_ARATH	HFA1A_ARATH	HFA1B_ARATH	LRL1_ARATH	LRL2_ARATH	BLH9_ARATH	AGL65_ARATH	BZP18_ARATH	HFA1E_ARATH	KAN2_ARATH	DRE2G_ARATH	HHO2_ARATH	HFA7A_ARATH	GATA7_ARATH	HAT1_ARATH	AP2_ARATH	ANR1_ARATH	ERF53_ARATH	HSFB4_ARATH	ATB14_ARATH	GTL1_ARATH	IDD7_ARATH	HBI1_ARATH	BPC1_ARATH	BH030_ARATH	BH034_ARATH	BBM_ARATH	C3H2_ARATH	ERF54_ARATH	ERF03_ARATH	AHL24_ARATH	ASIL2_ARATH	BLH10_ARATH	BH114_ARATH	BZP29_ARATH
molecular_function	GO:0003677	DNA binding	204	1794	0.113712	1	1.02492e-104	1	0	NRPE1_ARATH	RBR1_ARATH	SPL8_ARATH	SAP6_ARATH	LSH1_ARATH	LSH2_ARATH	LSH7_ARATH	EIL1_ARATH	HFA1A_ARATH	HFA1B_ARATH	LRP1_ARATH	C3H17_ARATH	CPSF_ARATH	ILP1_ARATH	ATB14_ARATH	C3H58_ARATH	GTL1_ARATH	IDD7_ARATH	HBI1_ARATH	BPC1_ARATH	BH030_ARATH	BBM_ARATH	C3H2_ARATH	LBD12_ARATH	ERF03_ARATH	C3H16_ARATH	ERF16_ARATH	DML2_ARATH	ARFF_ARATH	C3H44_ARATH	EIL2_ARATH	BZP30_ARATH	NRPD1_ARATH	PHL4_ARATH	BEE2_ARATH	C3H26_ARATH	ARFS_ARATH	C3H34_ARATH	LUMI_ARATH	PIF5_ARATH
cellular_component	GO:0016021	integral component of membrane	173	7990	0.0216521	6.54356e-33	1	0	1	PEK12_ARATH	PCR5_ARATH	SYP32_ARATH	SYP81_ARATH	ATL49_ARATH	LYK2_ARATH	AZG1_ARATH	CALSA_ARATH	ATL46_ARATH	ATL30_ARATH	CYT1B_ARATH	FBT8_ARATH	ATL3_ARATH	C2GR1_ARATH	C71BP_ARATH	FH10_ARATH	PME13_ARATH	ATL13_ARATH	MSL8_ARATH	PAM74_ARATH	MBRL_ARATH	PERK6_ARATH	PERK4_ARATH	PMTR_ARATH	FH2_ARATH	FBX12_ARATH	PTR44_ARATH	CSPLX_ARATH	OFT20_ARATH	PERK7_ARATH	RRL_ARATH	STEP2_ARATH	TAUE2_ARATH	NSTU1_ARATH	IOS1_ARATH	Y5188_ARATH	Y1755_ARATH	Y5720_ARATH	Y5189_ARATH	ZDH17_ARATH
biological_process	GO:0006355	regulation of transcription, DNA-templated	151	1172	0.12884	1	2.86978e-84	1	0	PHYD_ARATH	SCL4_ARATH	SHR_ARATH	TLP1_ARATH	LRL1_ARATH	LRL2_ARATH	HS25P_ARATH	KAN2_ARATH	LBD36_ARATH	HHO2_ARATH	GRF3_ARATH	IDD7_ARATH	BLI_ARATH	BPC1_ARATH	BH030_ARATH	BH034_ARATH	C3H2_ARATH	ASIL2_ARATH	BZP29_ARATH	PHL4_ARATH	ERF83_ARATH	BEE2_ARATH	LUH_ARATH	PIF7_ARATH	SCL8_ARATH	TCP4_ARATH	SCL7_ARATH	SCL27_ARATH	SCRM2_ARATH	STOP1_ARATH	TGT1_ARATH	SCL18_ARATH	UNE10_ARATH	SPL15_ARATH	SPCH_ARATH	SMB_ARATH	PHL5_ARATH	TCP21_ARATH	TGT3A_ARATH	SCR_ARATH
molecular_function	GO:0046872	metal ion binding	144	2781	0.0517799	0.241974	0.782007	1	1	PLY15_ARATH	URT1_ARATH	MOM1_ARATH	NRPE1_ARATH	RHC1A_ARATH	SPL8_ARATH	SR43C_ARATH	CPL1_ARATH	LRP1_ARATH	ARI1_ARATH	C3H17_ARATH	CPSF_ARATH	HIP32_ARATH	HIP39_ARATH	HIP34_ARATH	ARI2_ARATH	ARI7_ARATH	ATL49_ARATH	C3H58_ARATH	IDD7_ARATH	BRG1_ARATH	C3H2_ARATH	BOI_ARATH	CAF1E_ARATH	ATL46_ARATH	ATL30_ARATH	C3H16_ARATH	ATL3_ARATH	C2GR1_ARATH	DML2_ARATH	C3H44_ARATH	PPP7I_ARATH	ATL13_ARATH	MPPA2_ARATH	NRPD1_ARATH	FLZ8_ARATH	C3H26_ARATH	C3H34_ARATH	ARI3_ARATH	PCFS5_ARATH
cellular_component	GO:0005737	cytoplasm	124	2968	0.041779	5.38804e-26	1	0	1	SOFL6_ARATH	PMIR1_ARATH	SPL8_ARATH	TRP1_ARATH	STM_ARATH	MAK3_ARATH	HFA1A_ARATH	HFA1B_ARATH	JGB_ARATH	ARI1_ARATH	BZP18_ARATH	KN5B_ARATH	CPSF_ARATH	HASTY_ARATH	HFA1E_ARATH	ARI2_ARATH	ARI7_ARATH	ERF53_ARATH	HSFB4_ARATH	FCA_ARATH	KN5D_ARATH	BLI_ARATH	HESO1_ARATH	IQD26_ARATH	ERD15_ARATH	BRN2L_ARATH	BZP29_ARATH	PPP7I_ARATH	GLYI4_ARATH	PMTR_ARATH	KRP4_ARATH	FLK_ARATH	POF21_ARATH	PTBP2_ARATH	CCB14_ARATH	ARI3_ARATH	CSI1_ARATH	PCFS5_ARATH	OFT20_ARATH	SGS3_ARATH
molecular_function	GO:0005524	ATP binding	120	3748	0.0320171	9.58336e-05	0.999934	0.005	1	PEK12_ARATH	MOM1_ARATH	RH40_ARATH	PBL8_ARATH	SM3L1_ARATH	M3K5G_ARATH	KN5B_ARATH	KN13A_ARATH	KN14B_ARATH	GRF3_ARATH	ITPK2_ARATH	LYK2_ARATH	KN5D_ARATH	CSK2P_ARATH	CDKE1_ARATH	RH13_ARATH	PAM74_ARATH	PERK6_ARATH	KN4C_ARATH	KN14A_ARATH	PERK4_ARATH	PERK7_ARATH	SMAX1_ARATH	PP273_ARATH	SAE2_ARATH	STIL3_ARATH	RH6_ARATH	RPP1_ARATH	MURE_ARATH	PRP16_ARATH	STIL4_ARATH	STY13_ARATH	IOS1_ARATH	RIPK_ARATH	TSL_ARATH	Y5188_ARATH	Y1755_ARATH	Y5720_ARATH	Y5189_ARATH	Y5596_ARATH
molecular_function	GO:0000976	transcription cis-regulatory region binding	119	742	0.160377	1	1.6378e-55	1	0	SHR_ARATH	TLP1_ARATH	LFY_ARATH	EIL1_ARATH	LRL1_ARATH	BZP18_ARATH	KAN2_ARATH	DRE2G_ARATH	HHO2_ARATH	HFA7A_ARATH	GRF3_ARATH	HAT1_ARATH	AP2_ARATH	ANR1_ARATH	ERF53_ARATH	LBD15_ARATH	BH034_ARATH	ERF54_ARATH	ASIL2_ARATH	BZP29_ARATH	DRE2A_ARATH	GATA5_ARATH	ERF83_ARATH	POF21_ARATH	ARFS_ARATH	ANL2_ARATH	RLT2_ARATH	PIST_ARATH	SPT_ARATH	SHI_ARATH	SCL7_ARATH	SCL27_ARATH	SCRM2_ARATH	TGT1_ARATH	TGT3A_ARATH	VAL2_ARATH	WRK54_ARATH	TCP20_ARATH	WRKY2_ARATH	WRK27_ARATH
cellular_component	GO:0005829	cytosol	83	2614	0.0317521	0.000253248	0.999833	0.012	1	SR43C_ARATH	LNG2_ARATH	M3K5G_ARATH	BLH9_ARATH	KN14B_ARATH	BIG4_ARATH	MBD10_ARATH	MORF8_ARATH	PPD6_ARATH	EXA1_ARATH	AZG1_ARATH	CER26_ARATH	CAP1_ARATH	ERD15_ARATH	BZP29_ARATH	DSK2B_ARATH	CAP6_ARATH	KNAT3_ARATH	KNAT4_ARATH	DSK2A_ARATH	PPP7I_ARATH	MPPA2_ARATH	KN14A_ARATH	BEL1_ARATH	POF21_ARATH	PTN2B_ARATH	PUX5_ARATH	PUX6_ARATH	PABP8_ARATH	PTR44_ARATH	CSI1_ARATH	RUP2_ARATH	PABP2_ARATH	PABP3_ARATH	PABP5_ARATH	PRP8B_ARATH	SEC5A_ARATH	UBP12_ARATH	UPL2_ARATH	RP45C_ARATH
molecular_function	GO:0046983	protein dimerization activity	81	525	0.154286	1	1.07803e-26	1	0	PHE1_ARATH	SEP1_ARATH	LRL1_ARATH	LRL2_ARATH	AGL65_ARATH	ANR1_ARATH	MORF8_ARATH	HBI1_ARATH	BH030_ARATH	BH034_ARATH	BH114_ARATH	BH129_ARATH	BH112_ARATH	BEE2_ARATH	PIF7_ARATH	PIF5_ARATH	PIST_ARATH	SPT_ARATH	SEP2_ARATH	SEP3_ARATH	SCRM2_ARATH	UNE10_ARATH	SPCH_ARATH	PIF4_ARATH	TT16_ARATH	BH110_ARATH	BH013_ARATH	AGL62_ARATH	BH052_ARATH	BH078_ARATH	BH087_ARATH	GL3_ARATH	AG104_ARATH	AGL61_ARATH	FAMA_ARATH	ALC_ARATH	AGL3_ARATH	AGL30_ARATH	AGL63_ARATH	AGL66_ARATH
molecular_function	GO:0003729	mRNA binding	78	1038	0.0751445	1	7.76054e-07	1	0	VCS_ARATH	URT1_ARATH	C3H17_ARATH	CPSF_ARATH	MORF8_ARATH	C3H58_ARATH	FCA_ARATH	EXA1_ARATH	BRN2L_ARATH	FLK_ARATH	C3H26_ARATH	PTBP2_ARATH	PABP8_ARATH	C3H34_ARATH	PCFS5_ARATH	PABP2_ARATH	PATH2_ARATH	PP153_ARATH	RH6_ARATH	PRP8B_ARATH	THO4C_ARATH	RP45C_ARATH	PTBP3_ARATH	NSRA_ARATH	UBP1B_ARATH	UBP1A_ARATH	THO4B_ARATH	UBP1C_ARATH	RH8_ARATH	RH12_ARATH	VIP2_ARATH	UBA2B_ARATH	PCFS1_ARATH	RB45A_ARATH	RB45B_ARATH	RB47A_ARATH	RB47B_ARATH	ARP1_ARATH	AGO1_ARATH	IF4G2_ARATH
molecular_function	GO:0003723	RNA binding	75	1046	0.0717017	1	4.74342e-09	1	0	RH40_ARATH	PATH1_ARATH	STM_ARATH	CPL1_ARATH	CPSF_ARATH	HASTY_ARATH	FCA_ARATH	FPA_ARATH	CAF1E_ARATH	BPA1_ARATH	BRN2L_ARATH	RH13_ARATH	PP170_ARATH	PTBP2_ARATH	PABP8_ARATH	PABP2_ARATH	PABP3_ARATH	PABP5_ARATH	PATH2_ARATH	PP153_ARATH	PR40A_ARATH	PRP16_ARATH	UBA1A_ARATH	UBA1B_ARATH	XRN3_ARATH	SUA_ARATH	PPR66_ARATH	XRN2_ARATH	UBA1C_ARATH	RB45B_ARATH	RBM25_ARATH	HVT1_ARATH	CID4_ARATH	AGO7_ARATH	CAF1C_ARATH	AGO3_ARATH	F4K5C2_ARATH	F4IIR1_ARATH	F4I9K0_ARATH	Q8GXH2_ARATH
cellular_component	GO:0005886	plasma membrane	75	2866	0.0261689	5.62806e-07	1	0	1	PEK12_ARATH	ROGF8_ARATH	PBL8_ARATH	TRP1_ARATH	TLP1_ARATH	STM_ARATH	MAKR4_ARATH	M3K5G_ARATH	KN14B_ARATH	LYK2_ARATH	AZG1_ARATH	FLA6_ARATH	CALSA_ARATH	CAP1_ARATH	IQD26_ARATH	BPA1_ARATH	CYT1B_ARATH	EPN1_ARATH	ATL13_ARATH	MSL8_ARATH	GLYI4_ARATH	PERK6_ARATH	KN14A_ARATH	PERK4_ARATH	PKS2_ARATH	PTR44_ARATH	CSPLX_ARATH	CSI1_ARATH	PERK7_ARATH	PABP2_ARATH	SAU65_ARATH	RPP1_ARATH	PRP8B_ARATH	SEC5A_ARATH	SAU63_ARATH	IOS1_ARATH	RIPK_ARATH	Y5720_ARATH	Y5189_ARATH	UPL3_ARATH
molecular_function	GO:0043565	sequence-specific DNA binding	65	436	0.149083	1	1.40981e-61	1	0	SCL4_ARATH	SHR_ARATH	LFY_ARATH	BLH9_ARATH	GATA7_ARATH	ERF53_ARATH	GTL1_ARATH	BPC1_ARATH	BH034_ARATH	ERF54_ARATH	BZP29_ARATH	GATA2_ARATH	GATA6_ARATH	CB60C_ARATH	CB60D_ARATH	BH112_ARATH	ERF83_ARATH	ARFS_ARATH	SCL8_ARATH	SRS5_ARATH	TCP4_ARATH	SCL7_ARATH	SCL27_ARATH	SCRM2_ARATH	STOP1_ARATH	TGT1_ARATH	SCL18_ARATH	TCP21_ARATH	TGT3A_ARATH	SCR_ARATH	TCP20_ARATH	WRK68_ARATH	TCP14_ARATH	TCP8_ARATH	TCP7_ARATH	TCP10_ARATH	WRK58_ARATH	TCP22_ARATH	WRKY4_ARATH	TCP5_ARATH
biological_process	GO:0006357	regulation of transcription by RNA polymerase II	62	392	0.158163	1	6.56223e-26	1	0	PHE1_ARATH	RBR1_ARATH	SEP1_ARATH	STM_ARATH	HFA1A_ARATH	HFA1B_ARATH	LRL1_ARATH	LRL2_ARATH	BLH9_ARATH	AGL65_ARATH	HFA1E_ARATH	HFA7A_ARATH	ANR1_ARATH	HSFB4_ARATH	BLH10_ARATH	BH114_ARATH	KNAT3_ARATH	KNAT4_ARATH	BH129_ARATH	BH112_ARATH	HSFC1_ARATH	BEL1_ARATH	HUAL2_ARATH	MED4_ARATH	RLT2_ARATH	BLH8_ARATH	BLH4_ARATH	PIST_ARATH	SEP2_ARATH	SEP3_ARATH	PHL_ARATH	SNF12_ARATH	MED14_ARATH	TT16_ARATH	BH110_ARATH	AGL62_ARATH	AP1_ARATH	BH052_ARATH	NFYB7_ARATH	BLH3_ARATH
biological_process	GO:0045893	positive regulation of transcription, DNA-templated	60	300	0.2	1	8.02192e-38	1	0	LRP1_ARATH	C3H17_ARATH	DRE2G_ARATH	GATA7_ARATH	ERF53_ARATH	DRE2A_ARATH	GATA2_ARATH	GATA5_ARATH	GATA6_ARATH	LBD31_ARATH	NCKP1_ARATH	BH112_ARATH	LBD20_ARATH	LUH_ARATH	MED25_ARATH	SRS1_ARATH	SRS2_ARATH	SRS4_ARATH	SRS5_ARATH	SRS7_ARATH	SHI_ARATH	SPCH_ARATH	WRK20_ARATH	WRK48_ARATH	AP1_ARATH	ARFG_ARATH	NAC17_ARATH	MY120_ARATH	NAC75_ARATH	MYB56_ARATH	MYB58_ARATH	HAT7_ARATH	NFYC1_ARATH	NFYC2_ARATH	IDD5_ARATH	DRE2B_ARATH	ABI3_ARATH	ABI4_ARATH	AI5L1_ARATH	AI5L7_ARATH
molecular_function	GO:0000981	DNA-binding transcription factor activity, RNA polymerase II-specific	55	330	0.166667	1	6.96509e-22	1	0	PHE1_ARATH	SEP1_ARATH	STM_ARATH	LRL1_ARATH	LRL2_ARATH	BLH9_ARATH	AGL65_ARATH	HAT1_ARATH	ANR1_ARATH	BLH10_ARATH	BH114_ARATH	KNAT3_ARATH	KNAT4_ARATH	BH129_ARATH	BH112_ARATH	BEL1_ARATH	ANL2_ARATH	BLH8_ARATH	BLH4_ARATH	PIST_ARATH	SEP2_ARATH	SEP3_ARATH	TT16_ARATH	BH110_ARATH	AGL62_ARATH	AP1_ARATH	BH052_ARATH	MYB1_ARATH	MYB56_ARATH	NFYB7_ARATH	HAT7_ARATH	BLH3_ARATH	DPA_ARATH	DPB_ARATH	AG104_ARATH	AGL61_ARATH	BLH1_ARATH	AGL3_ARATH	AGL30_ARATH	AGL63_ARATH
molecular_function	GO:0000978	RNA polymerase II cis-regulatory region sequence-specific DNA binding	52	266	0.195489	1	3.97439e-20	1	0	PHE1_ARATH	SEP1_ARATH	STM_ARATH	HFA1A_ARATH	HFA1B_ARATH	LRL1_ARATH	LRL2_ARATH	BLH9_ARATH	AGL65_ARATH	HFA1E_ARATH	HFA7A_ARATH	ANR1_ARATH	HSFB4_ARATH	BLH10_ARATH	BH114_ARATH	KNAT3_ARATH	KNAT4_ARATH	BH129_ARATH	BH112_ARATH	HSFC1_ARATH	BEL1_ARATH	BLH8_ARATH	BLH4_ARATH	PIST_ARATH	SEP2_ARATH	SEP3_ARATH	TT16_ARATH	TCP8_ARATH	BH110_ARATH	AGL62_ARATH	AP1_ARATH	BH052_ARATH	MYB1_ARATH	MYB56_ARATH	BLH3_ARATH	HFA1D_ARATH	HFA6B_ARATH	AG104_ARATH	AGL61_ARATH	BLH1_ARATH
molecular_function	GO:0004674	protein serine/threonine kinase activity	51	1022	0.0499022	0.835148	0.202809	1	1	PEK12_ARATH	PBL8_ARATH	M3K5G_ARATH	CSK2P_ARATH	PAM74_ARATH	PERK6_ARATH	PERK4_ARATH	PERK7_ARATH	STY13_ARATH	IOS1_ARATH	RIPK_ARATH	TSL_ARATH	Y5188_ARATH	Y1755_ARATH	Y5189_ARATH	Y5596_ARATH	PERK2_ARATH	WNK1_ARATH	WNK5_ARATH	Y5516_ARATH	Y1518_ARATH	BAME3_ARATH	CIPKA_ARATH	AUR1_ARATH	F4JPL1_ARATH	F4JPL0_ARATH	Q9LVG6_ARATH	Q9SVR1_ARATH	Q8GY50_ARATH	Q8RX85_ARATH	Q8H0X4_ARATH	Q8VYJ6_ARATH	Q9LW66_ARATH	Q9LPZ0_ARATH	A0A1P8ASB9_ARATH	A0A1P8AQ00_ARATH	F4ITJ0_ARATH	A0A1P8B224_ARATH	F4KD80_ARATH	A0A2H1ZED2_ARATH
biological_process	GO:0045944	positive regulation of transcription by RNA polymerase II	43	197	0.218274	1	4.95303e-17	1	0	PHE1_ARATH	SEP1_ARATH	SLK3_ARATH	SLK1_ARATH	SLK2_ARATH	AGL65_ARATH	HAC1_ARATH	HAC4_ARATH	ANR1_ARATH	HAC12_ARATH	SEUSS_ARATH	MED25_ARATH	PIST_ARATH	SEP2_ARATH	SEP3_ARATH	TT16_ARATH	AGL62_ARATH	AP1_ARATH	BRM_ARATH	GIF1_ARATH	GIF2_ARATH	AG104_ARATH	AGL61_ARATH	AGL3_ARATH	AGL30_ARATH	AGL63_ARATH	AGL66_ARATH	A0A1P8BAR2_ARATH	A0A2H1ZE61_ARATH	F4IS82_ARATH	Q9M9L1_ARATH	Q766C0_ARATH	Q9S9U2_ARATH	O81421_ARATH	F4KB90_ARATH	F4I972_ARATH	F4J9K3_ARATH	A0A1P8AYX0_ARATH	A0A1P8AR61_ARATH	F4KCU5_ARATH
molecular_function	GO:0008270	zinc ion binding	43	861	0.0499419	0.859827	0.179725	1	1	SM3L1_ARATH	SC24C_ARATH	SAP6_ARATH	HAC1_ARATH	HAC4_ARATH	GATA7_ARATH	HAC12_ARATH	GATA2_ARATH	GATA5_ARATH	GATA6_ARATH	PP170_ARATH	PQT3L_ARATH	PP153_ARATH	SAP1_ARATH	SAP4_ARATH	VAL2_ARATH	SUVH1_ARATH	XRN3_ARATH	XRN2_ARATH	UBA1C_ARATH	GAT22_ARATH	KUA1_ARATH	COL2_ARATH	BBX22_ARATH	BBX24_ARATH	A0A1P8ARU4_ARATH	Q940K6_ARATH	A0A1P8ARV8_ARATH	O64633_ARATH	F4J1Y2_ARATH	A0A1P8ARV7_ARATH	Q8S8S8_ARATH	Q8VY23_ARATH	A0A1P8ATA1_ARATH	A0A178UBX9_ARATH	A0A178UD59_ARATH	F4IBS4_ARATH	A0A1P8AQG0_ARATH	A0A1P8BBL5_ARATH	F4IBY7_ARATH
biological_process	GO:0006397	mRNA processing	36	236	0.152542	1	1.00954e-10	1	0	VCR_ARATH	VCS_ARATH	URT1_ARATH	PATH1_ARATH	MORF8_ARATH	HUAL2_ARATH	PTBP2_ARATH	PQT3L_ARATH	PABP3_ARATH	PATH2_ARATH	RH6_ARATH	RP45C_ARATH	PTBP3_ARATH	SRRT_ARATH	UBP1B_ARATH	UBP1A_ARATH	VIR_ARATH	XRN3_ARATH	SUA_ARATH	UBP1C_ARATH	RH8_ARATH	RH12_ARATH	XRN2_ARATH	RB45A_ARATH	RB45B_ARATH	RB47A_ARATH	RB47B_ARATH	RBM25_ARATH	Q58G44_ARATH	A0A1P8ARN1_ARATH	O49570_ARATH	A0A178UBX9_ARATH	A0A178UD59_ARATH	A0A1P8BBL5_ARATH	A0A1P8B1R0_ARATH	F4K1L3_ARATH
cellular_component	GO:0009506	plasmodesma	36	926	0.0388769	0.381379	0.681921	1	1	STM_ARATH	MAKR4_ARATH	HIP34_ARATH	CALSA_ARATH	KN4C_ARATH	BEL1_ARATH	PTR44_ARATH	CSI1_ARATH	MOR1_ARATH	SAE2_ARATH	PRP8B_ARATH	SEC5A_ARATH	UNE10_ARATH	MED14_ARATH	UBP13_ARATH	UPL1_ARATH	QKY_ARATH	HSP7P_ARATH	HIP33_ARATH	MYO2_ARATH	CML12_ARATH	BRO1_ARATH	ACR4_ARATH	B3H4A8_ARATH	Q38957_ARATH	Q9SD86_ARATH	Q9M9N3_ARATH	Q9LR70_ARATH	Q9SKA3_ARATH	F4JSP7_ARATH	Q8S9K1_ARATH	Q9XIN3_ARATH	F4K4R1_ARATH	F4HWS2_ARATH	F4JUM4_ARATH	F4IPJ1_ARATH
biological_process	GO:0009908	flower development	35	210	0.166667	1	2.08462e-19	1	0	SLK3_ARATH	LFY_ARATH	AP2_ARATH	FCA_ARATH	FPA_ARATH	FRL2I_ARATH	BLI_ARATH	BRN2L_ARATH	ARFF_ARATH	HUAL2_ARATH	LUH_ARATH	LUMI_ARATH	RLT2_ARATH	RUP2_ARATH	MED25_ARATH	SEP3_ARATH	PHL_ARATH	VIL1_ARATH	WOX3_ARATH	AHL27_ARATH	AHL29_ARATH	AP1_ARATH	AS1_ARATH	LEUNG_ARATH	MBR2_ARATH	FY_ARATH	AHL22_ARATH	ANT_ARATH	GCR1_ARATH	FLXL1_ARATH	ARFH_ARATH	Q8RWV9_ARATH	F4KB90_ARATH	F4JUD2_ARATH	F4KGW7_ARATH
biological_process	GO:0030154	cell differentiation	35	186	0.188172	1	2.46833e-13	1	0	RBR1_ARATH	SEP1_ARATH	SLK3_ARATH	SLK1_ARATH	SPL8_ARATH	SLK2_ARATH	LFY_ARATH	GATA7_ARATH	AP2_ARATH	ATB14_ARATH	FCA_ARATH	FPA_ARATH	FRL2I_ARATH	GATA2_ARATH	GATA5_ARATH	GATA6_ARATH	LUH_ARATH	LUMI_ARATH	SEUSS_ARATH	PIST_ARATH	SEP2_ARATH	SCL27_ARATH	WOX3_ARATH	AP1_ARATH	ATBH9_ARATH	BAME3_ARATH	AGO1_ARATH	LEUNG_ARATH	FY_ARATH	ANT_ARATH	FLXL1_ARATH	AGL3_ARATH	Q1G378_ARATH	Q501B0_ARATH	Q9LME7_ARATH
cellular_component	GO:0005739	mitochondrion	33	1633	0.0202082	1.43709e-10	1	0	1	TI442_ARATH	M1030_ARATH	MORF8_ARATH	DSK2B_ARATH	DSK2A_ARATH	LBD1_ARATH	MPPA2_ARATH	PPR29_ARATH	PRP8A_ARATH	PABP5_ARATH	PP273_ARATH	RRL_ARATH	PP153_ARATH	OSGP2_ARATH	THO4C_ARATH	NMAT2_ARATH	UPL2_ARATH	PP368_ARATH	TI172_ARATH	U548_ARATH	PIN4_ARATH	UPL1_ARATH	HSP7O_ARATH	HSP7P_ARATH	HLP_ARATH	HS906_ARATH	CPNA1_ARATH	Q8LF90_ARATH	Q8GY50_ARATH	Q9CAY6_ARATH	Q9ZPW5_ARATH	Q9SHS2_ARATH	F4IPA6_ARATH
molecular_function	GO:0004712	protein serine/threonine/tyrosine kinase activity	32	809	0.039555	0.313337	0.747468	1	1	PEK12_ARATH	PBL8_ARATH	M3K5G_ARATH	CSK2P_ARATH	CDKE1_ARATH	PAM74_ARATH	PERK6_ARATH	PERK4_ARATH	PERK7_ARATH	STY13_ARATH	RIPK_ARATH	TSL_ARATH	Y5188_ARATH	Y1755_ARATH	Y5189_ARATH	Y5596_ARATH	PERK2_ARATH	Y3589_ARATH	WNK1_ARATH	WNK5_ARATH	Y1518_ARATH	BAME3_ARATH	CDPK9_ARATH	CIPKA_ARATH	AUR1_ARATH	AUR2_ARATH	CDKC1_ARATH	Q9M085_ARATH	F4ITJ0_ARATH	A0A1P8B224_ARATH	F4K645_ARATH	A0A1P8B232_ARATH
molecular_function	GO:0004672	protein kinase activity	30	693	0.04329	0.906356	0.114963	1	1	LYK2_ARATH	PERK4_ARATH	STY13_ARATH	Y5720_ARATH	WNK1_ARATH	WNK5_ARATH	GFS12_ARATH	B3H6U2_ARATH	Q8GY50_ARATH	F4JRW3_ARATH	Q9M085_ARATH	A0A1P8BE22_ARATH	A0A1P8AV24_ARATH	A0A1P8ASB5_ARATH	A0A1P8BAD8_ARATH	F4IDG2_ARATH	A0A1P8BE34_ARATH	F4J622_ARATH	A0A1P8AV20_ARATH	F4K647_ARATH	F4JMF4_ARATH	A0A1I9LN82_ARATH	F4K646_ARATH	A0A1P8AML6_ARATH	F4K644_ARATH	A0A1P8B6A6_ARATH	A0A1P8BE48_ARATH	F4K645_ARATH	F4I6A5_ARATH	A0A1P8AMZ9_ARATH
molecular_function	GO:0106310	protein serine kinase activity	29	774	0.0374677	0.245475	0.80958	1	1	PEK12_ARATH	PBL8_ARATH	M3K5G_ARATH	CSK2P_ARATH	CDKE1_ARATH	PAM74_ARATH	PERK6_ARATH	PERK4_ARATH	PERK7_ARATH	STY13_ARATH	RIPK_ARATH	TSL_ARATH	Y5188_ARATH	Y1755_ARATH	Y5189_ARATH	Y5596_ARATH	PERK2_ARATH	WNK1_ARATH	WNK5_ARATH	Y1518_ARATH	BAME3_ARATH	CDPK9_ARATH	CIPKA_ARATH	AUR1_ARATH	AUR2_ARATH	CDKC1_ARATH	F4ITJ0_ARATH	A0A1P8B224_ARATH	A0A1P8B232_ARATH
cellular_component	GO:0005794	Golgi apparatus	24	984	0.0243902	0.00104019	0.999398	0.038	1	CAP3_ARATH	CALSA_ARATH	CAP1_ARATH	CAP10_ARATH	EPN1_ARATH	CAP6_ARATH	CAP9_ARATH	PTR44_ARATH	CSI1_ARATH	SC16B_ARATH	NSTU1_ARATH	ZDH17_ARATH	ZDHC1_ARATH	Y1720_ARATH	EPN3_ARATH	GCR1_ARATH	CAP7_ARATH	A0A178W5R2_ARATH	Q9SJR4_ARATH	Q2HIG7_ARATH	Q3EBM1_ARATH	F4KHR9_ARATH	F4JHZ4_ARATH	Q2V422_ARATH
biological_process	GO:0009793	embryo development ending in seed dormancy	24	324	0.0740741	0.999592	0.000833812	1	0.571	PHE1_ARATH	SLK1_ARATH	SLK2_ARATH	ATL49_ARATH	GEML5_ARATH	ASIL2_ARATH	LUH_ARATH	SEUSS_ARATH	PPR29_ARATH	PP273_ARATH	SAE2_ARATH	TCP4_ARATH	PP153_ARATH	OSGP2_ARATH	PRP16_ARATH	VIR_ARATH	WOX9_ARATH	ASIL1_ARATH	ABI3_ARATH	APC1_ARATH	ARR20_ARATH	CPNA1_ARATH	Q9ZU66_ARATH	F4K3Y7_ARATH
biological_process	GO:0006325	chromatin organization	24	194	0.123711	0.999898	0.000207364	1	0.218	SM3L1_ARATH	HAC1_ARATH	HAC4_ARATH	HAC12_ARATH	FAS1_ARATH	SNF12_ARATH	TAF1_ARATH	TAF1B_ARATH	AHL27_ARATH	FLD_ARATH	EAF1A_ARATH	EAF1B_ARATH	A0A1P8ARU4_ARATH	A0A1P8ARV8_ARATH	A0A1I9LL80_ARATH	A0A1P8ARV7_ARATH	A0A1P8ATA1_ARATH	F4J7T1_ARATH	A0A1I9LNW6_ARATH	A0A1I9LPB1_ARATH	A0A1P8AQG0_ARATH	F4IDH2_ARATH	A0A1I9LNW7_ARATH	F4I4I8_ARATH
molecular_function	GO:0004842	ubiquitin-protein transferase activity	24	329	0.0729483	0.999389	0.00111263	1	0.416	BRG1_ARATH	BOI_ARATH	RZF1_ARATH	UPL3_ARATH	PUB38_ARATH	UPL1_ARATH	HOS1_ARATH	A0A1P8AYL6_ARATH	F4IIR1_ARATH	Q84JF9_ARATH	Q0WQD5_ARATH	Q1PDK3_ARATH	Q8L7G9_ARATH	Q66GR4_ARATH	Q8LCK5_ARATH	Q9FJQ8_ARATH	F4JKP2_ARATH	A0A1P8B027_ARATH	A0A1P8B159_ARATH	B3H700_ARATH	A0A1P8B029_ARATH	A0A1P8AYS1_ARATH	A0A1P8AYL7_ARATH	A0A1P8AYS5_ARATH
molecular_function	GO:0003676	nucleic acid binding	23	348	0.066092	1	1.80201e-113	1	0	SM3L1_ARATH	PQT3L_ARATH	VIP1_ARATH	A0A1I9LT69_ARATH	Q940K6_ARATH	O65655_ARATH	Q0WQ48_ARATH	Q9C8K5_ARATH	A0A1I9LSC2_ARATH	Q147M4_ARATH	A0A1I9LSB9_ARATH	A0A178UBX9_ARATH	A0A1P8BG32_ARATH	A0A178UD59_ARATH	A0A1P8BG29_ARATH	F4K7A8_ARATH	A0A1P8BG46_ARATH	A0A1P8BBL5_ARATH	A0A1P8ATL0_ARATH	A0A1P8BG61_ARATH	A0A1P8ATK9_ARATH	A0A178VJW0_ARATH	F4K1L3_ARATH
biological_process	GO:0016567	protein ubiquitination	22	556	0.0395683	0.449688	0.62589	1	1	RHC1A_ARATH	ATL49_ARATH	ATL46_ARATH	ATL30_ARATH	C3H16_ARATH	ATL3_ARATH	ATL13_ARATH	PQT3L_ARATH	SKI11_ARATH	UPL2_ARATH	TAUE2_ARATH	WAV3_ARATH	PUB38_ARATH	XB34_ARATH	Y5880_ARATH	UPL1_ARATH	Y3210_ARATH	HOS1_ARATH	ATL47_ARATH	Q9C941_ARATH	Q0WQD5_ARATH	A0A1I9LSK9_ARATH
biological_process	GO:0009414	response to water deprivation	22	315	0.0698413	0.984683	0.0259652	1	1	GTL1_ARATH	ERD15_ARATH	DRE2A_ARATH	GLYI4_ARATH	ERF83_ARATH	LUH_ARATH	CSI1_ARATH	RZF1_ARATH	WRK33_ARATH	RBM25_ARATH	ARP1_ARATH	ARR1_ARATH	LEUNG_ARATH	ABI4_ARATH	AHK4_ARATH	EF113_ARATH	AI5L6_ARATH	AI5L3_ARATH	O49538_ARATH	B3H7F6_ARATH	F4JB53_ARATH	F4HRC9_ARATH
biological_process	GO:0009738	abscisic acid-activated signaling pathway	22	219	0.100457	0.999493	0.00114758	1	0.656	CPL1_ARATH	PERK4_ARATH	RRL_ARATH	IOS1_ARATH	ZFP1_ARATH	ZFP4_ARATH	NFYC9_ARATH	NFYC3_ARATH	NFYC4_ARATH	ABI3_ARATH	GCR1_ARATH	ABI4_ARATH	AI5L1_ARATH	AI5L7_ARATH	ABR1_ARATH	AI5L4_ARATH	AI5L5_ARATH	EIF3H_ARATH	AI5L6_ARATH	AI5L3_ARATH	F4JB53_ARATH	F4I3C9_ARATH
cellular_component	GO:0005783	endoplasmic reticulum	21	939	0.0223642	9.80449e-05	0.99995	0.005	1	SYP81_ARATH	PATH1_ARATH	ERO1_ARATH	MBRL_ARATH	SGS3_ARATH	UAH_ARATH	TI172_ARATH	ZDH17_ARATH	PIN4_ARATH	VAP21_ARATH	ZDHC1_ARATH	ACO12_ARATH	HS906_ARATH	AHK4_ARATH	C81F1_ARATH	Q9SJR4_ARATH	O22791_ARATH	Q6NLR3_ARATH	O80798_ARATH	Q9SZR6_ARATH	F4K498_ARATH
molecular_function	GO:0046982	protein heterodimerization activity	21	146	0.143836	1	1.28731e-06	1	0	TAF9_ARATH	SEUSS_ARATH	SRS1_ARATH	SHI_ARATH	TAF12_ARATH	TA12B_ARATH	BKI1_ARATH	AP1_ARATH	NFYB7_ARATH	NFYC1_ARATH	NFYC2_ARATH	NFYC8_ARATH	NFYC9_ARATH	NFYC3_ARATH	NFYC4_ARATH	DPB_ARATH	BLH1_ARATH	Q8GXR1_ARATH	Q9LEY8_ARATH	Q944I5_ARATH	F4JUD2_ARATH
biological_process	GO:0009737	response to abscisic acid	21	365	0.0575342	0.999873	0.000246824	1	0.238	HHO2_ARATH	ELF3_ARATH	ERF83_ARATH	TCP14_ARATH	ARP1_ARATH	MYB78_ARATH	KUA1_ARATH	CRU3_ARATH	ABI3_ARATH	CRU1_ARATH	BLH1_ARATH	CRU2_ARATH	ABR1_ARATH	EF113_ARATH	EIF3H_ARATH	AI5L6_ARATH	Q9LZ21_ARATH	Q8RWV9_ARATH	B3H7F6_ARATH	F4JB53_ARATH	F4HRC9_ARATH
biological_process	GO:0009873	ethylene-activated signaling pathway	21	192	0.109375	0.999951	0.000136482	1	0.16	TRP1_ARATH	EIL1_ARATH	ERF53_ARATH	ERF54_ARATH	ERF03_ARATH	ERF16_ARATH	EIL2_ARATH	ERF83_ARATH	WRK54_ARATH	WRKY6_ARATH	RA211_ARATH	AIL6_ARATH	CRF3_ARATH	ERF87_ARATH	ABI4_ARATH	AIL7_ARATH	ABR1_ARATH	EF105_ARATH	EF113_ARATH	EIN3_ARATH	A0A1P8BG66_ARATH
cellular_component	GO:0009507	chloroplast	20	2041	0.00979912	1.19609e-20	1	0	1	SCAR4_ARATH	SR43C_ARATH	ARC6_ARATH	MORF8_ARATH	PPD6_ARATH	CSK2P_ARATH	MPPA2_ARATH	PPR29_ARATH	PP273_ARATH	PP153_ARATH	MURE_ARATH	U548_ARATH	Y4320_ARATH	CHLD_ARATH	MYRS2_ARATH	IDD5_ARATH	FB131_ARATH	CPNA1_ARATH	F4K7T6_ARATH	Q58G44_ARATH
biological_process	GO:0009555	pollen development	20	235	0.0851064	0.997517	0.00485779	1	1	RBR1_ARATH	LRP1_ARATH	AGL65_ARATH	CALSA_ARATH	FAS1_ARATH	PHL4_ARATH	SRS1_ARATH	SRS2_ARATH	SRS5_ARATH	SHI_ARATH	WRKY2_ARATH	2SS5_ARATH	DRE2B_ARATH	AG104_ARATH	AGL30_ARATH	AGL66_ARATH	F4I8L6_ARATH	Q9FKM4_ARATH	F4IPA6_ARATH	F4HU48_ARATH
molecular_function	GO:0061630	ubiquitin protein ligase activity	20	278	0.0719424	0.989688	0.0195469	1	1	RHC1A_ARATH	ARI1_ARATH	ARI2_ARATH	ARI7_ARATH	C3H16_ARATH	ARI3_ARATH	PQT3L_ARATH	RZF1_ARATH	UPL2_ARATH	WAV3_ARATH	UPL1_ARATH	MBR2_ARATH	ARI4_ARATH	Q9FN58_ARATH	Q6NLR3_ARATH	Q9LJJ3_ARATH	Q5EAI9_ARATH	A0A178UBX9_ARATH	A0A178UD59_ARATH	A0A1P8BBL5_ARATH
biological_process	GO:0009734	auxin-activated signaling pathway	20	268	0.0746269	0.999438	0.0012642	1	0.676	LRP1_ARATH	ARFF_ARATH	ARFS_ARATH	SRS1_ARATH	SRS2_ARATH	SRS4_ARATH	SRS5_ARATH	SRS7_ARATH	SHI_ARATH	SAU65_ARATH	SAU63_ARATH	PIN4_ARATH	ARFG_ARATH	ARFH_ARATH	A0A1P8AXA0_ARATH	A0A1P8BCS5_ARATH	A0A1P8AY30_ARATH	A0A1P8BC81_ARATH	F4K5M5_ARATH	A0A1P8BC69_ARATH
biological_process	GO:0009733	response to auxin	19	251	0.0756972	0.999935	0.000136973	1	0.16	LRP1_ARATH	ARFF_ARATH	ELF3_ARATH	LUH_ARATH	ARFS_ARATH	SEUSS_ARATH	WRK23_ARATH	AGO1_ARATH	ARFG_ARATH	ASIL1_ARATH	GAT22_ARATH	KUA1_ARATH	LEUNG_ARATH	ABI3_ARATH	ARFH_ARATH	EIF3H_ARATH	Q8GZ96_ARATH	Q9SW54_ARATH	A0A1P8AMQ0_ARATH
cellular_component	GO:0000932	P-body	19	73	0.260274	1	8.907e-11	1	0	VCR_ARATH	VCS_ARATH	URT1_ARATH	SMG7_ARATH	PATH1_ARATH	EXA1_ARATH	CAF1E_ARATH	HESO1_ARATH	PTBP2_ARATH	PATH2_ARATH	RH6_ARATH	PTBP3_ARATH	RH8_ARATH	RH12_ARATH	VIP2_ARATH	CAF1C_ARATH	A0A1I9LRS8_ARATH	A8MR45_ARATH	A0A1P8B9R0_ARATH
molecular_function	GO:0003680	minor groove of adenine-thymine-rich DNA binding	19	37	0.513514	1	8.40684e-17	1	0	AHL24_ARATH	AHL4_ARATH	AHL8_ARATH	AHL9_ARATH	AHL14_ARATH	AHL17_ARATH	AHL23_ARATH	AHL25_ARATH	AHL26_ARATH	AHL27_ARATH	AHL29_ARATH	AHL13_ARATH	AHL15_ARATH	AHL22_ARATH	AHL6_ARATH	AHL10_ARATH	F4J4T1_ARATH	A0A1P8B2P7_ARATH	A0A1P8BGC9_ARATH
molecular_function	GO:0008017	microtubule binding	18	247	0.0728745	0.993288	0.0134854	1	1	LNG2_ARATH	KN5B_ARATH	KN13A_ARATH	KN14B_ARATH	KN5D_ARATH	KN4C_ARATH	KN14A_ARATH	CSI1_ARATH	MOR1_ARATH	A0A1P8BDP2_ARATH	A0A2H1ZEJ0_ARATH	Q4V3C5_ARATH	F4JCB3_ARATH	A0A1P8BDN5_ARATH	A0A1P8BDQ0_ARATH	A0A1P8BDP7_ARATH	A0A1P8BGU4_ARATH	A0A1P8BDS9_ARATH
biological_process	GO:0006952	defense response	18	772	0.0233161	0.0189334	0.986162	0.984	1	SMG7_ARATH	PBL8_ARATH	BRG1_ARATH	GLYI4_ARATH	ERF83_ARATH	RPP1_ARATH	TI11A_ARATH	WRKY4_ARATH	VIP1_ARATH	UBA2B_ARATH	MY108_ARATH	ABI4_ARATH	Q9M1P1_ARATH	Q9C647_ARATH	A0A1I9LP82_ARATH	Q147M4_ARATH	F4J359_ARATH	A0A1I9LP83_ARATH
biological_process	GO:0048366	leaf development	18	122	0.147541	0.999999	1.70246e-06	1	0.001	RBR1_ARATH	SHR_ARATH	FAS1_ARATH	PKS2_ARATH	ARFS_ARATH	SPER2_ARATH	TCP4_ARATH	SCR_ARATH	TCP10_ARATH	Y5625_ARATH	TCP5_ARATH	ARFG_ARATH	CRF3_ARATH	GRF5_ARATH	KUA1_ARATH	GIF1_ARATH	GIF2_ARATH	F4HQJ3_ARATH
biological_process	GO:0015031	protein transport	18	376	0.0478723	0.560914	0.501944	1	1	SYP81_ARATH	BIG4_ARATH	ELC_ARATH	C3H16_ARATH	NUP58_ARATH	SC16B_ARATH	VP202_ARATH	MAG5_ARATH	EPN3_ARATH	F4IHD7_ARATH	Q9LQP9_ARATH	Q9FKU4_ARATH	Q2HIG7_ARATH	A0A1I9LRG2_ARATH	A0A1P8BE45_ARATH	A0A1P8AWG1_ARATH	A0A1I9LRG3_ARATH	A0A1P8B9X0_ARATH
biological_process	GO:0009736	cytokinin-activated signaling pathway	18	87	0.206897	1	7.45787e-08	1	0	SOFL6_ARATH	TA12B_ARATH	ARR19_ARATH	ARR1_ARATH	GAT22_ARATH	CRF3_ARATH	AHP6_ARATH	ARR20_ARATH	GCR1_ARATH	AHP1_ARATH	AHK4_ARATH	AHP5_ARATH	Q104N3_ARATH	A0A1I9LLF2_ARATH	A0A1P8B026_ARATH	A0A1P8AWM0_ARATH	A0A1P8AR55_ARATH	A0A1P8ASK7_ARATH
biological_process	GO:0010228	vegetative to reproductive phase transition of meristem	17	112	0.151786	1	1.0363e-07	1	0	BLH9_ARATH	FPA_ARATH	FRL2I_ARATH	AHL24_ARATH	LUMI_ARATH	RLT2_ARATH	BLH8_ARATH	AHL25_ARATH	AHL26_ARATH	AHL27_ARATH	AHL29_ARATH	HOS1_ARATH	FLD_ARATH	MBR2_ARATH	AHL22_ARATH	BBX24_ARATH	Q9M9N3_ARATH
biological_process	GO:0045892	negative regulation of transcription, DNA-templated	17	169	0.100592	0.999968	8.3149e-05	1	0.116	CPL1_ARATH	BLH9_ARATH	ILP1_ARATH	GTL1_ARATH	ERF83_ARATH	LUH_ARATH	RLT2_ARATH	SPER2_ARATH	WRK27_ARATH	WRKY6_ARATH	Y5625_ARATH	Y2608_ARATH	AS1_ARATH	HOS1_ARATH	KUA1_ARATH	LEUNG_ARATH	CCA1_ARATH
cellular_component	GO:0005819	spindle	17	86	0.197674	0.999999	3.20704e-06	1	0	KN5B_ARATH	KN5D_ARATH	KN14A_ARATH	MOR1_ARATH	AUR1_ARATH	A8MS21_ARATH	A0A1P8BE37_ARATH	Q9FM57_ARATH	G3GBK1_ARATH	A0A1P8BE61_ARATH	A0A1P8BE54_ARATH	A0A1P8BE62_ARATH	A0A1P8BE53_ARATH	A0A1P8B7D6_ARATH	A0A1P8BE82_ARATH	A0A1P8BE52_ARATH	A0A1P8BE57_ARATH
biological_process	GO:0009416	response to light stimulus	16	175	0.0914286	0.999997	5.66285e-06	1	0.009	LSH1_ARATH	LSH2_ARATH	LSH7_ARATH	HS25P_ARATH	GATA7_ARATH	KNAT3_ARATH	KNAT4_ARATH	GATA2_ARATH	GATA6_ARATH	PIF7_ARATH	PHL_ARATH	UNE10_ARATH	TAF1B_ARATH	GAT22_ARATH	MYB58_ARATH	BBX24_ARATH
biological_process	GO:0042742	defense response to bacterium	16	331	0.0483384	0.682562	0.407046	1	1	MOM1_ARATH	EIL1_ARATH	EXA1_ARATH	BOI_ARATH	RIPK_ARATH	Y5189_ARATH	WRK54_ARATH	WRK27_ARATH	WRK48_ARATH	WRK33_ARATH	AS1_ARATH	GFS12_ARATH	AHK4_ARATH	EIN3_ARATH	F4J361_ARATH	Q8VYJ6_ARATH
biological_process	GO:0051301	cell division	16	333	0.048048	0.952714	0.0704374	1	1	PATH1_ARATH	ELC_ARATH	CDKE1_ARATH	CCU41_ARATH	FAS1_ARATH	CCB14_ARATH	PPR29_ARATH	SCL27_ARATH	MURE_ARATH	CDC6A_ARATH	APC1_ARATH	CKS1_ARATH	GIF1_ARATH	AUR1_ARATH	CCA23_ARATH	A0A1P8BEM5_ARATH
molecular_function	GO:0016887	ATP hydrolysis activity	15	512	0.0292969	0.00908079	0.994388	0.558	1	RH40_ARATH	RH13_ARATH	SMAX1_ARATH	RH6_ARATH	PRP16_ARATH	RH8_ARATH	RH12_ARATH	BRM_ARATH	HSP7H_ARATH	HSP7O_ARATH	HSP7P_ARATH	HVT1_ARATH	HS906_ARATH	CPNA1_ARATH	Q9ZPW5_ARATH
biological_process	GO:0050832	defense response to fungus	15	563	0.026643	0.246253	0.816036	1	1	NRPE1_ARATH	M3K5G_ARATH	EXA1_ARATH	MED8_ARATH	BOI_ARATH	BPA1_ARATH	MED25_ARATH	RPP1_ARATH	PRP16_ARATH	WRK54_ARATH	WRK33_ARATH	DF141_ARATH	APCB1_ARATH	AS1_ARATH	ABR1_ARATH
biological_process	GO:0006511	ubiquitin-dependent protein catabolic process	15	289	0.0519031	0.925217	0.106277	1	1	RHC1A_ARATH	ARI1_ARATH	ARI2_ARATH	ARI7_ARATH	DSK2B_ARATH	DSK2A_ARATH	ARI3_ARATH	PQT3L_ARATH	UBP12_ARATH	UBP13_ARATH	ARI4_ARATH	Q9FN58_ARATH	Q6NLR3_ARATH	Q9LJJ3_ARATH	F4J7I2_ARATH
molecular_function	GO:0042803	protein homodimerization activity	14	214	0.0654206	0.954935	0.080839	1	1	PHYD_ARATH	VCR_ARATH	VCS_ARATH	MOM1_ARATH	STM_ARATH	LFY_ARATH	LRP1_ARATH	ARC6_ARATH	MORF8_ARATH	BZP29_ARATH	IOS1_ARATH	AS1_ARATH	MYB56_ARATH	BLH1_ARATH
molecular_function	GO:0003713	transcription coactivator activity	14	64	0.21875	1	5.56082e-07	1	0	TAF9_ARATH	HAC1_ARATH	HAC4_ARATH	HAC12_ARATH	LUH_ARATH	MED25_ARATH	MD15A_ARATH	MD15C_ARATH	GIF1_ARATH	GIF2_ARATH	A0A1P8AQ17_ARATH	A0A1R7T3A9_ARATH	A0A1P8AQ03_ARATH	F4HQJ3_ARATH
biological_process	GO:0009408	response to heat	13	174	0.0747126	0.998777	0.00269151	1	0.97	HFA1A_ARATH	HFA1B_ARATH	HS25P_ARATH	HFA7A_ARATH	ERF54_ARATH	DRE2A_ARATH	GLYI4_ARATH	WRK33_ARATH	TCP5_ARATH	HSP7H_ARATH	HSP7O_ARATH	HFA1D_ARATH	EF105_ARATH
cellular_component	GO:0005730	nucleolus	13	528	0.0246212	0.0121214	0.99394	0.485	1	NRPE1_ARATH	RH13_ARATH	THO4C_ARATH	NUP54_ARATH	SRRT_ARATH	AS1_ARATH	ASIL1_ARATH	AUR1_ARATH	Q9LSK7_ARATH	Q8S8S8_ARATH	Q9ZU66_ARATH	F4JN76_ARATH	F4IQ78_ARATH
molecular_function	GO:0043621	protein self-association	13	116	0.112069	0.99952	0.00150745	1	0.549	LFY_ARATH	ARC6_ARATH	BZP18_ARATH	HS25P_ARATH	HAT1_ARATH	AHL4_ARATH	STOP1_ARATH	VIP1_ARATH	AHL25_ARATH	AHL27_ARATH	AHL29_ARATH	AHL22_ARATH	BRO1_ARATH
biological_process	GO:0010468	regulation of gene expression	13	150	0.0866667	1	4.43271e-97	1	0	MOM1_ARATH	FLK_ARATH	SNF12_ARATH	ZWIP5_ARATH	GAT22_ARATH	MY120_ARATH	NFYC4_ARATH	GIF1_ARATH	CCA1_ARATH	Q0WLY0_ARATH	Q9M1Q4_ARATH	O82762_ARATH	F4JLJ3_ARATH
biological_process	GO:0007165	signal transduction	13	434	0.0299539	1	7.28939e-07	1	0.001	STY13_ARATH	RGAP2_ARATH	REN1_ARATH	CDPK9_ARATH	CIPKA_ARATH	F4J361_ARATH	Q9M1P1_ARATH	A0A1I9LP82_ARATH	Q9M085_ARATH	F4J359_ARATH	A0A1I9LN82_ARATH	A0A1I9LP83_ARATH	A0A1P8B965_ARATH
biological_process	GO:0007018	microtubule-based movement	13	128	0.101562	0.998564	0.00400786	1	0.997	KN5B_ARATH	KN13A_ARATH	KN14B_ARATH	KN5D_ARATH	KN4C_ARATH	KN14A_ARATH	A0A1P8BDP2_ARATH	A0A2H1ZEJ0_ARATH	A0A1P8BDN5_ARATH	A0A1P8BDQ0_ARATH	A0A1P8BDP7_ARATH	A0A1P8BGU4_ARATH	A0A1P8BDS9_ARATH
biological_process	GO:0048364	root development	12	180	0.0666667	0.983099	0.0261398	1	1	LRP1_ARATH	HASTY_ARATH	GRF3_ARATH	PERK4_ARATH	ANL2_ARATH	PRP16_ARATH	SNF12_ARATH	WAV3_ARATH	SCR_ARATH	PIN4_ARATH	ARR1_ARATH	F4KGW7_ARATH
cellular_component	GO:0005576	extracellular region	12	1448	0.00828729	7.66529e-20	1	0	1	GDL89_ARATH	CAP9_ARATH	RB45B_ARATH	CHLD_ARATH	DF141_ARATH	NFYC9_ARATH	GDL17_ARATH	GDL77_ARATH	GLIP6_ARATH	EIF3H_ARATH	Q0WRA3_ARATH	A0A1P8BG25_ARATH
cellular_component	GO:0009536	plastid	12	904	0.0132743	2.81851e-22	1	0	1	ARC6_ARATH	EXA1_ARATH	GEML5_ARATH	BPA1_ARATH	PPP7I_ARATH	UAH_ARATH	VAP21_ARATH	NFYC4_ARATH	CAP7_ARATH	Q93XY1_ARATH	Q93VS8_ARATH	Q9FGF3_ARATH
biological_process	GO:0009651	response to salt stress	12	374	0.0320856	0.324818	0.755376	1	1	RHC1A_ARATH	CPL1_ARATH	ERF53_ARATH	PTN2B_ARATH	SMXL4_ARATH	VIR_ARATH	WRK33_ARATH	ARP1_ARATH	EF113_ARATH	AI5L6_ARATH	F4JB53_ARATH	F4HRC9_ARATH
cellular_component	GO:0005667	transcription regulator complex	12	27	0.444444	0.999995	1.68567e-05	1	0.003	RBR1_ARATH	SLK3_ARATH	SLK1_ARATH	SLK2_ARATH	HAC1_ARATH	HAC4_ARATH	HAC12_ARATH	ELF3_ARATH	SEUSS_ARATH	MED25_ARATH	DPA_ARATH	DPB_ARATH
biological_process	GO:0009909	regulation of flower development	12	85	0.141176	0.999885	0.00035048	1	0.326	MED8_ARATH	ELF3_ARATH	LUH_ARATH	SEUSS_ARATH	MED25_ARATH	SNF12_ARATH	LEUNG_ARATH	EAF1A_ARATH	EAF1B_ARATH	COL2_ARATH	Q67ZF8_ARATH	F4K3Y7_ARATH
molecular_function	GO:0016787	hydrolase activity	12	758	0.0158311	7.26605e-28	1	0	1	MOM1_ARATH	SMXL4_ARATH	A8MQF2_ARATH	A0A1I9LT69_ARATH	A0A2H1ZEJ0_ARATH	Q9SJ35_ARATH	F4IDG2_ARATH	A0A1P8BEM8_ARATH	A0A1P8B592_ARATH	A0A1P8BGU4_ARATH	A0A178VJW0_ARATH	A0A1P8AMZ9_ARATH
biological_process	GO:0040008	regulation of growth	12	140	0.0857143	0.999999	3.57683e-06	1	0.005	SMG7_ARATH	HBI1_ARATH	BLI_ARATH	BZP29_ARATH	CSK2P_ARATH	BZP30_ARATH	CSI1_ARATH	SAU65_ARATH	SAU63_ARATH	MED14_ARATH	REN1_ARATH	MBR2_ARATH
cellular_component	GO:0005654	nucleoplasm	12	162	0.0740741	0.999926	0.000152279	1	0.038	BZP18_ARATH	CPSF_ARATH	ICU11_ARATH	KRP5_ARATH	KRP3_ARATH	NRPD1_ARATH	KRP4_ARATH	SEUSS_ARATH	THO4C_ARATH	VIR_ARATH	THO4B_ARATH	F4K388_ARATH
molecular_function	GO:0016740	transferase activity	11	357	0.0308123	3.78187e-07	1	0	1	ATL49_ARATH	ATL46_ARATH	ATL30_ARATH	ATL3_ARATH	ATL13_ARATH	SAE2_ARATH	XB34_ARATH	ATL47_ARATH	F4KHR9_ARATH	Q9FFV8_ARATH	A0A1I9LSR7_ARATH
biological_process	GO:0006468	protein phosphorylation	11	283	0.0388693	0.94008	0.0868774	1	1	CDKE1_ARATH	STY13_ARATH	RIPK_ARATH	Y3589_ARATH	WNK1_ARATH	WNK5_ARATH	AHK4_ARATH	CDKC1_ARATH	Q9LVG6_ARATH	Q8GY50_ARATH	Q9C9I9_ARATH
molecular_function	GO:0042802	identical protein binding	11	210	0.052381	0.899564	0.146966	1	1	PHYD_ARATH	ROGF8_ARATH	SR43C_ARATH	SPT_ARATH	TGT1_ARATH	IOS1_ARATH	TSL_ARATH	TGT3A_ARATH	UBA1A_ARATH	BAME3_ARATH	AS1_ARATH
biological_process	GO:0009739	response to gibberellin	11	76	0.144737	0.999995	1.67373e-05	1	0.024	ARC6_ARATH	GRF3_ARATH	BOI_ARATH	SHI_ARATH	WRK27_ARATH	TCP14_ARATH	GAT22_ARATH	GRF5_ARATH	KUA1_ARATH	Q9LZ21_ARATH	Q9M9A3_ARATH
biological_process	GO:0048481	plant ovule development	11	48	0.229167	1	1.49873e-08	1	0	SEP1_ARATH	SLK1_ARATH	SLK2_ARATH	KAN2_ARATH	AP2_ARATH	SEUSS_ARATH	SEP2_ARATH	SEP3_ARATH	TT16_ARATH	APC1_ARATH	F4KB90_ARATH
molecular_function	GO:0003779	actin binding	11	103	0.106796	0.924358	0.13151	1	1	SCAR4_ARATH	FH10_ARATH	FH2_ARATH	FH7_ARATH	A0A1P8BBH5_ARATH	A0A1P8BBE9_ARATH	A0A1P8BBE5_ARATH	F4K0A7_ARATH	A0A1P8BBE8_ARATH	A0A1P8BBE6_ARATH	A0A178UA95_ARATH
molecular_function	GO:0003743	translation initiation factor activity	11	151	0.0728477	0.969232	0.0628914	1	1	PABP2_ARATH	TA12B_ARATH	IF4G2_ARATH	IF4G_ARATH	EIF3H_ARATH	F4I421_ARATH	C0SUW8_ARATH	Q8GXR1_ARATH	Q94C21_ARATH	A8MR97_ARATH	A8MR62_ARATH
molecular_function	GO:0031490	chromatin DNA binding	11	38	0.289474	1	5.05959e-07	1	0	LFY_ARATH	BZP18_ARATH	HAC1_ARATH	HAC4_ARATH	HAC12_ARATH	KRP5_ARATH	SUVH1_ARATH	MD15A_ARATH	MD15C_ARATH	A0A1P8AQ17_ARATH	A0A1P8AQ03_ARATH
molecular_function	GO:0003777	microtubule motor activity	11	108	0.101852	0.999666	0.00108981	1	0.413	KN13A_ARATH	KN14B_ARATH	KN4C_ARATH	KN14A_ARATH	A0A1P8BDP2_ARATH	A0A2H1ZEJ0_ARATH	A0A1P8BDN5_ARATH	A0A1P8BDQ0_ARATH	A0A1P8BDP7_ARATH	A0A1P8BGU4_ARATH	A0A1P8BDS9_ARATH
biological_process	GO:0000160	phosphorelay signal transduction system	11	50	0.22	1	3.67398e-08	1	0	APRR3_ARATH	AHP6_ARATH	AHP1_ARATH	AHK4_ARATH	AHP5_ARATH	Q104N3_ARATH	A0A1P8BEW7_ARATH	A0A1I9LLF2_ARATH	F4JXG7_ARATH	A0A1P8AWM0_ARATH	A0A1P8AR55_ARATH
molecular_function	GO:0003724	RNA helicase activity	10	127	0.0787402	0.978319	0.0484088	1	1	RH40_ARATH	RH13_ARATH	RH6_ARATH	PRP16_ARATH	RH8_ARATH	RH12_ARATH	HVT1_ARATH	A0A178VU89_ARATH	A0A1I9LT69_ARATH	A0A178VJW0_ARATH
cellular_component	GO:0005789	endoplasmic reticulum membrane	10	547	0.0182815	3.00213e-05	0.999991	0	1	SC24C_ARATH	ERO1_ARATH	NCKP1_ARATH	PMTR_ARATH	RPP1_ARATH	VAP21_ARATH	BAME3_ARATH	NAC13_ARATH	NAC17_ARATH	AHK4_ARATH
cellular_component	GO:0016020	membrane	10	900	0.0111111	2.07559e-38	1	0	1	TRP1_ARATH	TOL7_ARATH	TOL9_ARATH	C81F1_ARATH	Q6DBQ2_ARATH	Q9FNN8_ARATH	Q9LN10_ARATH	Q9FN70_ARATH	A0A1P8AYS3_ARATH	A0A1P8B4J7_ARATH
biological_process	GO:0071456	cellular response to hypoxia	10	241	0.0414938	0.651133	0.469705	1	1	SAP6_ARATH	HHO2_ARATH	ERD15_ARATH	DRE2A_ARATH	FLZ8_ARATH	MES10_ARATH	UBP1C_ARATH	CML12_ARATH	Q9SY56_ARATH	Q84J48_ARATH
biological_process	GO:0000398	mRNA splicing, via spliceosome	10	172	0.0581395	0.8627	0.207387	1	1	CPSF_ARATH	ILP1_ARATH	PRP8A_ARATH	PR40A_ARATH	PRP16_ARATH	SUA_ARATH	Q5XEN2_ARATH	A0A1P8B4Y6_ARATH	F4KCH7_ARATH	A0A1P8AM89_ARATH
cellular_component	GO:0005768	endosome	10	325	0.0307692	0.255408	0.813919	1	1	MTV1_ARATH	STM_ARATH	EPN1_ARATH	MYO2_ARATH	EPN3_ARATH	Q2HIG7_ARATH	F4KHR9_ARATH	F4JHZ4_ARATH	A0A1I9LRG2_ARATH	A0A1I9LRG3_ARATH
cellular_component	GO:0012505	endomembrane system	10	146	0.0684932	0.0004536	0.999694	0.016	1	SYP32_ARATH	MSL8_ARATH	CHX10_ARATH	CHX11_ARATH	CHX12_ARATH	CHX3_ARATH	CHX4_ARATH	CHX5_ARATH	CHX7_ARATH	CHX9_ARATH
biological_process	GO:0007623	circadian rhythm	10	106	0.0943396	0.99999	3.56824e-05	1	0.037	GATA7_ARATH	ELF3_ARATH	SMXL2_ARATH	SPT_ARATH	PHL_ARATH	WNK1_ARATH	GAT22_ARATH	CCA1_ARATH	A0A2H1ZEL2_ARATH	A0A2H1ZEK6_ARATH
biological_process	GO:0034605	cellular response to heat	10	57	0.175439	0.999994	3.00874e-05	1	0.034	HFA1A_ARATH	HFA1B_ARATH	HFA1E_ARATH	HFA7A_ARATH	HSFC1_ARATH	WRK33_ARATH	RB47A_ARATH	RB47B_ARATH	HFA1D_ARATH	HFA6B_ARATH
biological_process	GO:0009965	leaf morphogenesis	10	53	0.188679	0.999759	0.000815468	1	0.571	VCS_ARATH	HASTY_ARATH	LBD36_ARATH	BLI_ARATH	LBD12_ARATH	BLH4_ARATH	TCP5_ARATH	AGO1_ARATH	AS1_ARATH	DPOLA_ARATH
molecular_function	GO:0043130	ubiquitin binding	10	87	0.114943	0.998593	0.00460155	1	0.937	MTV1_ARATH	ELC_ARATH	PUX5_ARATH	PUX6_ARATH	TOL7_ARATH	TOL6_ARATH	TOL9_ARATH	CKS1_ARATH	BRO1_ARATH	F4JV51_ARATH
biological_process	GO:0006351	transcription, DNA-templated	10	156	0.0641026	1	4.81231e-81	1	0	NRPE1_ARATH	GRF3_ARATH	GTL1_ARATH	NRPD1_ARATH	BEE2_ARATH	UNE10_ARATH	GRF5_ARATH	A0A1P8ANM7_ARATH	A0A1P8ANM9_ARATH	A0A1P8ANM8_ARATH
molecular_function	GO:0005509	calcium ion binding	10	366	0.0273224	0.0784294	0.956701	1	1	PPD6_ARATH	CML11_ARATH	CDPK9_ARATH	CML12_ARATH	A0A1P8B183_ARATH	Q9T0I9_ARATH	F4IJ44_ARATH	Q9LM78_ARATH	F4IJ45_ARATH	A0A1I9LLB2_ARATH
biological_process	GO:0006417	regulation of translation	10	82	0.121951	0.999987	3.91618e-05	1	0.039	PTBP2_ARATH	PABP8_ARATH	PABP3_ARATH	RH6_ARATH	PTBP3_ARATH	RH8_ARATH	RH12_ARATH	AGO1_ARATH	AGO7_ARATH	AGO3_ARATH
cellular_component	GO:0005874	microtubule	10	234	0.042735	0.597845	0.514986	1	1	KN5B_ARATH	KN13A_ARATH	KN14B_ARATH	KN5D_ARATH	KN4C_ARATH	KN14A_ARATH	MOR1_ARATH	AUR1_ARATH	A8MS21_ARATH	A0A1P8B7D6_ARATH
cellular_component	GO:0016592	mediator complex	10	64	0.15625	0.999941	0.000286143	1	0.07	MED8_ARATH	MED9_ARATH	CDKE1_ARATH	MED4_ARATH	MED25_ARATH	PR40A_ARATH	MED14_ARATH	MD15A_ARATH	Q9C7P3_ARATH	A0A1P8AME1_ARATH
molecular_function	GO:0003712	transcription coregulator activity	10	79	0.126582	1	2.86231e-07	1	0	LNK2_ARATH	HUAL2_ARATH	MED4_ARATH	PHL_ARATH	MED14_ARATH	NFYC3_ARATH	BBX24_ARATH	Q0WQ76_ARATH	F4JPL2_ARATH	F4IPJ1_ARATH
biological_process	GO:0009851	auxin biosynthetic process	10	40	0.25	0.999998	1.10765e-05	1	0.015	LRP1_ARATH	SRS1_ARATH	SRS2_ARATH	SRS4_ARATH	SRS5_ARATH	SRS7_ARATH	SHI_ARATH	A0A1P8AXA0_ARATH	A0A1P8BC81_ARATH	A0A1P8BC69_ARATH
molecular_function	GO:0004402	histone acetyltransferase activity	10	29	0.344828	1	5.82049e-07	1	0	HAC1_ARATH	HAC4_ARATH	HAC12_ARATH	A0A1P8ARU4_ARATH	A0A1P8ARV8_ARATH	A0A1P8ARV7_ARATH	A0A1P8ATA1_ARATH	A0A1P8AQG0_ARATH	F4IDH2_ARATH	F4I4I8_ARATH
cellular_component	GO:0030015	CCR4-NOT core complex	10	25	0.4	1	2.68235e-08	1	0	CAF1E_ARATH	VIP2_ARATH	CAF1C_ARATH	Q0WP31_ARATH	A0A1P8B9Q7_ARATH	A0A1P8B9E0_ARATH	F4JWJ6_ARATH	A8MR45_ARATH	F4JWJ7_ARATH	A0A1P8B9R0_ARATH
biological_process	GO:0009409	response to cold	9	319	0.0282132	0.165992	0.892592	1	1	GRF3_ARATH	ELF3_ARATH	GLYI4_ARATH	SPT_ARATH	WRK33_ARATH	VIL1_ARATH	HOS1_ARATH	GRF5_ARATH	CCA1_ARATH
cellular_component	GO:0000325	plant-type vacuole	9	685	0.0131387	1.14056e-05	0.999996	0	1	RH40_ARATH	FUCO1_ARATH	MPPA2_ARATH	CML12_ARATH	GCR1_ARATH	Q8RWZ0_ARATH	O80798_ARATH	Q56W79_ARATH	F4IPA6_ARATH
molecular_function	GO:0016301	kinase activity	9	363	0.0247934	0.246317	0.787076	1	1	CSK2P_ARATH	CDKC1_ARATH	Q8L603_ARATH	Q9LW66_ARATH	F4JQR9_ARATH	F4JUU4_ARATH	F4K388_ARATH	F4IXI5_ARATH	A0A1P8ASB3_ARATH
biological_process	GO:0009723	response to ethylene	9	99	0.0909091	0.999928	0.000174918	1	0.181	EIL1_ARATH	BPC1_ARATH	ARFS_ARATH	WRKY4_ARATH	RA211_ARATH	ARFG_ARATH	KUA1_ARATH	EF113_ARATH	EIN3_ARATH
cellular_component	GO:0005856	cytoskeleton	9	119	0.0756303	0.98859	0.0182187	1	0.986	SCAR4_ARATH	LNG2_ARATH	IQD26_ARATH	A0A1P8BBH5_ARATH	A0A1P8BBE9_ARATH	A0A1P8BBE5_ARATH	A0A1P8BBE8_ARATH	A0A1P8BBE6_ARATH	A0A178UA95_ARATH
biological_process	GO:0042752	regulation of circadian rhythm	9	39	0.230769	0.999994	3.70291e-05	1	0.038	TIC_ARATH	ELF3_ARATH	TCP21_ARATH	TCP7_ARATH	B3H7F6_ARATH	A0A1I9LQ49_ARATH	A8MRY5_ARATH	F4JXG7_ARATH	F4J0W8_ARATH
biological_process	GO:0006970	response to osmotic stress	9	143	0.0629371	0.705373	0.369236	1	1	GLYI4_ARATH	PTN2B_ARATH	RZF1_ARATH	SPCH_ARATH	WRK54_ARATH	WRK33_ARATH	VIP1_ARATH	ABI4_ARATH	ABR1_ARATH
biological_process	GO:0048316	seed development	9	73	0.123288	1	1.37272e-09	1	0	AP2_ARATH	BLI_ARATH	TT16_ARATH	ABI4_ARATH	AGL63_ARATH	A0A1P8BAR2_ARATH	A0A2H1ZE61_ARATH	Q9FM57_ARATH	F4KCU5_ARATH
biological_process	GO:0031047	gene silencing by RNA	9	64	0.140625	0.999994	2.06366e-05	1	0.025	MOM1_ARATH	HASTY_ARATH	NRPD1_ARATH	AGO3_ARATH	C3H19_ARATH	C0SVU7_ARATH	Q9LTJ0_ARATH	A0A1P8ATL0_ARATH	A0A1P8ATK9_ARATH
molecular_function	GO:0004386	helicase activity	9	124	0.0725806	0.919221	0.124811	1	1	MOM1_ARATH	SM3L1_ARATH	HVT1_ARATH	Q84JK0_ARATH	A0A1I9LL80_ARATH	F4J7T1_ARATH	A0A1I9LPB1_ARATH	A0A1P8ASM1_ARATH	A0A1P8B130_ARATH
cellular_component	GO:1990904	ribonucleoprotein complex	9	56	0.160714	0.184664	0.861508	1	1	RH40_ARATH	FCA_ARATH	BRN2L_ARATH	PABP8_ARATH	PABP2_ARATH	PABP3_ARATH	PABP5_ARATH	Q9FXE0_ARATH	F4I0X0_ARATH
molecular_function	GO:0008143	poly(A) binding	9	25	0.36	1	5.48881e-07	1	0	PABP8_ARATH	PABP2_ARATH	PABP3_ARATH	PABP5_ARATH	RP45C_ARATH	RB45A_ARATH	RB45B_ARATH	RB47A_ARATH	RB47B_ARATH
biological_process	GO:0007049	cell cycle	9	188	0.0478723	0.975301	0.0356863	1	1	PATH1_ARATH	KRP5_ARATH	KRP3_ARATH	CDKE1_ARATH	CCU41_ARATH	KRP4_ARATH	DPA_ARATH	F4J8Q4_ARATH	A0A1P8BEM5_ARATH
molecular_function	GO:0045735	nutrient reservoir activity	9	33	0.272727	0.999999	7.58569e-06	1	0.004	2SS1_ARATH	2SS4_ARATH	2SS5_ARATH	CRU3_ARATH	CRU1_ARATH	CRU2_ARATH	A0A1P8B543_ARATH	F4K8S2_ARATH	F4JLA9_ARATH
molecular_function	GO:0001228	DNA-binding transcription activator activity, RNA polymerase II-specific	9	35	0.257143	0.999999	1.28482e-05	1	0.005	SUVH1_ARATH	NFYB7_ARATH	NFYC1_ARATH	NFYC2_ARATH	NFYC8_ARATH	NFYC9_ARATH	NFYC3_ARATH	NFYC4_ARATH	Q0WQM3_ARATH
cellular_component	GO:0009570	chloroplast stroma	8	690	0.0115942	2.20533e-05	0.999993	0	1	SR43C_ARATH	PPD6_ARATH	DXR_ARATH	MPPA2_ARATH	CHLD_ARATH	HS906_ARATH	CPNA1_ARATH	F4K7T6_ARATH
cellular_component	GO:0030136	clathrin-coated vesicle	8	36	0.222222	0.999744	0.00103896	1	0.2	MTV1_ARATH	CAP3_ARATH	CAP1_ARATH	CAP10_ARATH	CAP6_ARATH	CAP9_ARATH	CAP7_ARATH	A0A178W5R2_ARATH
molecular_function	GO:0000149	SNARE binding	8	66	0.121212	0.997716	0.00748087	1	0.994	SYP32_ARATH	SC24C_ARATH	CAP3_ARATH	CAP1_ARATH	CAP10_ARATH	CAP6_ARATH	CAP9_ARATH	CAP7_ARATH
molecular_function	GO:0005516	calmodulin binding	8	317	0.0252366	0.0669084	0.966133	1	1	CPSF_ARATH	IQD26_ARATH	CB60C_ARATH	CB60D_ARATH	WRK21_ARATH	CDPK9_ARATH	MYO2_ARATH	F4K0A7_ARATH
biological_process	GO:0010029	regulation of seed germination	8	50	0.16	0.999978	9.58405e-05	1	0.135	GEML5_ARATH	TCP14_ARATH	ARP1_ARATH	GAT22_ARATH	NFYC9_ARATH	NFYC3_ARATH	NFYC4_ARATH	AHK4_ARATH
biological_process	GO:0009640	photomorphogenesis	8	58	0.137931	0.999994	2.67074e-05	1	0.032	SRS5_ARATH	ZFP1_ARATH	AHL27_ARATH	AHL29_ARATH	AHL22_ARATH	BBX22_ARATH	BBX24_ARATH	F4IWU4_ARATH
cellular_component	GO:0000139	Golgi membrane	8	489	0.0163599	0.000778878	0.999707	0.033	1	SYP32_ARATH	SC24C_ARATH	OFT20_ARATH	RPP1_ARATH	Q9FKU4_ARATH	Q2HIG7_ARATH	A0A1P8BE45_ARATH	A0A1P8B9X0_ARATH
biological_process	GO:0009658	chloroplast organization	8	190	0.0421053	0.972339	0.049819	1	1	ARC6_ARATH	HS25P_ARATH	RUP2_ARATH	MURE_ARATH	GAT22_ARATH	COL2_ARATH	CPNA1_ARATH	F4IBS4_ARATH
cellular_component	GO:0043231	intracellular membrane-bounded organelle	8	292	0.0273973	1	3.78249e-25	1	0	PP170_ARATH	PP153_ARATH	PPR66_ARATH	F4I421_ARATH	C0SUW8_ARATH	Q9SFV1_ARATH	A0A1I9LMQ3_ARATH	F4K7D1_ARATH
molecular_function	GO:0000977	RNA polymerase II transcription regulatory region sequence-specific DNA binding	8	65	0.123077	1	2.61169e-21	1	0	RBR1_ARATH	A0A1P8BAR2_ARATH	A0A2H1ZE61_ARATH	F4KB90_ARATH	F4I972_ARATH	A0A1P8AYX0_ARATH	F4KCU5_ARATH	A0A1P8AMJ8_ARATH
biological_process	GO:1900150	regulation of defense response to fungus	8	46	0.173913	0.999821	0.000929823	1	0.61	M3K5G_ARATH	LBD20_ARATH	IOS1_ARATH	WRKY4_ARATH	A0A1P8B9A4_ARATH	B3H4A8_ARATH	F4JLT1_ARATH	A0A1P8B9B2_ARATH
biological_process	GO:0010431	seed maturation	8	32	0.25	0.998634	0.0044876	1	0.998	ASIL2_ARATH	ASIL1_ARATH	CRU3_ARATH	CRU1_ARATH	CRU2_ARATH	A0A1P8B543_ARATH	F4K8S2_ARATH	F4JLA9_ARATH
biological_process	GO:0009944	polarity specification of adaxial/abaxial axis	8	23	0.347826	1	3.13364e-06	1	0.005	HASTY_ARATH	KAN2_ARATH	ATB14_ARATH	LUH_ARATH	ATBH9_ARATH	AS1_ARATH	LEUNG_ARATH	DOF51_ARATH
biological_process	GO:1902074	response to salt	8	29	0.275862	0.999996	3.71111e-05	1	0.039	GLYI4_ARATH	LUH_ARATH	MYB78_ARATH	LEUNG_ARATH	ABR1_ARATH	C3H30_ARATH	Q9LZ21_ARATH	Q8RWV9_ARATH
biological_process	GO:0009735	response to cytokinin	8	54	0.148148	1	7.28178e-09	1	0	TCP14_ARATH	ARR1_ARATH	GAT22_ARATH	AHP6_ARATH	GCR1_ARATH	F4IQH8_ARATH	F4I0I7_ARATH	Q8GZ96_ARATH
biological_process	GO:0043161	proteasome-mediated ubiquitin-dependent protein catabolic process	8	102	0.0784314	0.591181	0.517906	1	1	BRG1_ARATH	BOI_ARATH	PUX5_ARATH	PUX6_ARATH	SAP1_ARATH	UPL2_ARATH	UPL1_ARATH	MBR2_ARATH
biological_process	GO:0009740	gibberellic acid mediated signaling pathway	8	83	0.0963855	0.998202	0.00569711	1	1	LFY_ARATH	HBI1_ARATH	SHI_ARATH	GAT22_ARATH	NFYC9_ARATH	NFYC3_ARATH	NFYC4_ARATH	GCR1_ARATH
biological_process	GO:0009904	chloroplast accumulation movement	8	28	0.285714	0.999998	1.63995e-05	1	0.019	KN14B_ARATH	KN14A_ARATH	Y3270_ARATH	A0A1P8BDP2_ARATH	A0A1P8BDN5_ARATH	A0A1P8BDQ0_ARATH	A0A1P8BDP7_ARATH	A0A1P8BDS9_ARATH
biological_process	GO:0010091	trichome branching	8	35	0.228571	0.999988	9.50389e-05	1	0.134	BLI_ARATH	ELC_ARATH	BLT_ARATH	MED25_ARATH	UPL3_ARATH	GL3_ARATH	A0A1P8ARL0_ARATH	A0A1P8ARI7_ARATH
biological_process	GO:0006813	potassium ion transport	8	57	0.140351	0.989244	0.0297438	1	1	CHX10_ARATH	CHX11_ARATH	CHX12_ARATH	CHX3_ARATH	CHX4_ARATH	CHX5_ARATH	CHX7_ARATH	CHX9_ARATH
molecular_function	GO:0015299	solute:proton antiporter activity	8	32	0.25	0.998844	0.00454017	1	0.929	CHX10_ARATH	CHX11_ARATH	CHX12_ARATH	CHX3_ARATH	CHX4_ARATH	CHX5_ARATH	CHX7_ARATH	CHX9_ARATH
biological_process	GO:0006885	regulation of pH	8	32	0.25	0.998873	0.00444542	1	0.998	CHX10_ARATH	CHX11_ARATH	CHX12_ARATH	CHX3_ARATH	CHX4_ARATH	CHX5_ARATH	CHX7_ARATH	CHX9_ARATH
cellular_component	GO:0005905	clathrin-coated pit	7	25	0.28	0.999953	0.000343892	1	0.081	CAP3_ARATH	CAP1_ARATH	CAP10_ARATH	CAP6_ARATH	CAP9_ARATH	CAP7_ARATH	A0A178W5R2_ARATH
molecular_function	GO:0005545	1-phosphatidylinositol binding	7	21	0.333333	0.999999	1.86677e-05	1	0.01	CAP3_ARATH	CAP1_ARATH	CAP10_ARATH	CAP6_ARATH	CAP9_ARATH	CAP7_ARATH	A0A178W5R2_ARATH
biological_process	GO:0048268	clathrin coat assembly	7	19	0.368421	0.999999	8.52401e-06	1	0.011	CAP3_ARATH	CAP1_ARATH	CAP10_ARATH	CAP6_ARATH	CAP9_ARATH	CAP7_ARATH	A0A178W5R2_ARATH
biological_process	GO:0072583	clathrin-dependent endocytosis	7	38	0.184211	0.999787	0.00122762	1	0.67	CAP3_ARATH	CAP1_ARATH	CAP10_ARATH	CAP6_ARATH	CAP9_ARATH	CAP7_ARATH	Q9FKM4_ARATH
biological_process	GO:0006900	vesicle budding from membrane	7	25	0.28	0.999999	6.46328e-06	1	0.011	CAP3_ARATH	CAP1_ARATH	CAP10_ARATH	CAP6_ARATH	CAP9_ARATH	VP202_ARATH	CAP7_ARATH
biological_process	GO:0051607	defense response to virus	7	60	0.116667	0.984902	0.0421979	1	1	EXA1_ARATH	SGS3_ARATH	AGO1_ARATH	AGO7_ARATH	AGO3_ARATH	A0A1P8ATL0_ARATH	A0A1P8ATK9_ARATH
biological_process	GO:0006979	response to oxidative stress	7	294	0.0238095	0.045019	0.974834	1	1	SC24C_ARATH	CPSF_ARATH	GLYI4_ARATH	LUH_ARATH	SEUSS_ARATH	LEUNG_ARATH	B3H7F6_ARATH
biological_process	GO:0071555	cell wall organization	7	338	0.0207101	0.000550376	0.999782	0.111	1	CER26_ARATH	CALSA_ARATH	KN4C_ARATH	OFT20_ARATH	NAC26_ARATH	NAC75_ARATH	NAC7_ARATH
biological_process	GO:0035556	intracellular signal transduction	7	199	0.0351759	0.999871	0.000241226	1	0.238	TSL_ARATH	WNK1_ARATH	WNK5_ARATH	CDPK9_ARATH	Q8H0X4_ARATH	Q8VYJ6_ARATH	Q9LW66_ARATH
biological_process	GO:0010150	leaf senescence	7	111	0.0630631	0.940624	0.113132	1	1	TCP4_ARATH	TCP10_ARATH	TCP5_ARATH	UBA2B_ARATH	AHL27_ARATH	NAC17_ARATH	KUA1_ARATH
biological_process	GO:0009611	response to wounding	7	197	0.035533	0.591019	0.537585	1	1	CPL1_ARATH	GLYI4_ARATH	LUH_ARATH	TI11A_ARATH	STEP2_ARATH	WRK20_ARATH	LEUNG_ARATH
biological_process	GO:0000122	negative regulation of transcription by RNA polymerase II	7	44	0.159091	0.999492	0.00253913	1	0.964	SLK3_ARATH	SLK1_ARATH	SLK2_ARATH	ELF3_ARATH	SEUSS_ARATH	KUA1_ARATH	Q8S8S8_ARATH
cellular_component	GO:0016607	nuclear speck	7	93	0.0752688	0.960632	0.0917174	1	1	CPL1_ARATH	PIF7_ARATH	NSRA_ARATH	SRRT_ARATH	VIR_ARATH	VIL1_ARATH	F4IBS4_ARATH
biological_process	GO:0018298	protein-chromophore linkage	7	79	0.0886076	0.979873	0.0533461	1	1	PHYD_ARATH	A0A1P8BE22_ARATH	A0A1P8BE34_ARATH	F4K646_ARATH	F4K644_ARATH	A0A1P8BE48_ARATH	F4K645_ARATH
biological_process	GO:0031347	regulation of defense response	7	57	0.122807	0.999567	0.000974538	1	0.614	SMG7_ARATH	EXA1_ARATH	TI11A_ARATH	WRK54_ARATH	TCP14_ARATH	WRK58_ARATH	Q8L7G9_ARATH
molecular_function	GO:0009881	photoreceptor activity	7	29	0.241379	0.999626	0.00196437	1	0.791	PHYD_ARATH	A0A1P8BE22_ARATH	A0A1P8BE34_ARATH	F4K646_ARATH	F4K644_ARATH	A0A1P8BE48_ARATH	F4K645_ARATH
biological_process	GO:0009585	red, far-red light phototransduction	7	55	0.127273	0.997697	0.00895141	1	1	PHYD_ARATH	ELF3_ARATH	PKS2_ARATH	PIF7_ARATH	PIF5_ARATH	MED25_ARATH	PIF4_ARATH
biological_process	GO:0009742	brassinosteroid mediated signaling pathway	7	91	0.0769231	0.942484	0.124421	1	1	HBI1_ARATH	WRK54_ARATH	BKI1_ARATH	MYB56_ARATH	GCR1_ARATH	BSL3_ARATH	F4IFQ0_ARATH
biological_process	GO:0006281	DNA repair	7	251	0.0278884	0.0156841	0.991828	0.965	1	STIL3_ARATH	SNF12_ARATH	STIL4_ARATH	F4K4R1_ARATH	B3H5R7_ARATH	F4JPL2_ARATH	F4IPJ1_ARATH
biological_process	GO:0048653	anther development	7	38	0.184211	0.998777	0.00437685	1	0.998	SPL8_ARATH	LRP1_ARATH	SRS1_ARATH	SRS2_ARATH	SRS5_ARATH	SHI_ARATH	SPL15_ARATH
biological_process	GO:0051028	mRNA transport	7	42	0.166667	0.998977	0.00348996	1	0.989	C3H16_ARATH	NUP58_ARATH	RH6_ARATH	NUP54_ARATH	NUP35_ARATH	RH8_ARATH	RH12_ARATH
biological_process	GO:0009960	endosperm development	7	34	0.205882	0.999743	0.00143358	1	0.734	RBR1_ARATH	IKU1_ARATH	PP273_ARATH	AGL62_ARATH	Q9LPK0_ARATH	Q3EBM8_ARATH	A0A1P8AUC0_ARATH
biological_process	GO:0030036	actin cytoskeleton organization	7	43	0.162791	0.837875	0.258716	1	1	SCAR4_ARATH	A0A1P8BBH5_ARATH	A0A1P8BBE9_ARATH	A0A1P8BBE5_ARATH	A0A1P8BBE8_ARATH	A0A1P8BBE6_ARATH	A0A178UA95_ARATH
biological_process	GO:0000209	protein polyubiquitination	7	100	0.07	0.950034	0.105772	1	1	ARI1_ARATH	ARI2_ARATH	ARI7_ARATH	ARI3_ARATH	UPL2_ARATH	UPL1_ARATH	ARI4_ARATH
molecular_function	GO:0000987	cis-regulatory region sequence-specific DNA binding	7	24	0.291667	1	3.30669e-23	1	0	BPC1_ARATH	TCP20_ARATH	F4IS82_ARATH	Q9M9L1_ARATH	Q766C0_ARATH	A0A1P8AR61_ARATH	B3H507_ARATH
cellular_component	GO:0035267	NuA4 histone acetyltransferase complex	7	21	0.333333	0.999997	3.86141e-05	1	0.006	EAF1A_ARATH	EAF1B_ARATH	A0A1I9LL80_ARATH	F4J7T1_ARATH	F4JPL2_ARATH	A0A1I9LPB1_ARATH	F4IPJ1_ARATH
molecular_function	GO:0003690	double-stranded DNA binding	6	112	0.0535714	1	3.38323e-53	1	0	HUAL2_ARATH	PIF7_ARATH	AHL27_ARATH	Q9SRQ0_ARATH	Q9LSK7_ARATH	Q9LF51_ARATH
biological_process	GO:0042023	DNA endoreduplication	6	26	0.230769	0.99978	0.000997923	1	0.621	ILP1_ARATH	UPL3_ARATH	CDC6A_ARATH	DPB_ARATH	CKS1_ARATH	CCA23_ARATH
cellular_component	GO:0009941	chloroplast envelope	6	551	0.0108893	1.19555e-05	0.999996	0	1	SR43C_ARATH	ARC6_ARATH	KN14A_ARATH	U548_ARATH	CPNA1_ARATH	Q9FGF3_ARATH
biological_process	GO:0055085	transmembrane transport	6	114	0.0526316	0.00013408	0.999953	0.031	1	AB2B_ARATH	CACLC_ARATH	Q8W4M2_ARATH	Q9FN70_ARATH	A0A1P8AY30_ARATH	A0A1I9LM96_ARATH
molecular_function	GO:0032050	clathrin heavy chain binding	6	23	0.26087	0.999964	0.000341678	1	0.165	CAP3_ARATH	CAP1_ARATH	CAP10_ARATH	CAP6_ARATH	CAP9_ARATH	CAP7_ARATH
molecular_function	GO:0005546	phosphatidylinositol-4,5-bisphosphate binding	6	27	0.222222	0.999886	0.000864386	1	0.357	CAP3_ARATH	CAP1_ARATH	CAP10_ARATH	CAP6_ARATH	CAP9_ARATH	CAP7_ARATH
cellular_component	GO:0048046	apoplast	6	501	0.011976	0.000101979	0.999974	0.005	1	PCP11_ARATH	FUCO1_ARATH	EAF1B_ARATH	DIR25_ARATH	CPNA1_ARATH	Q38958_ARATH
cellular_component	GO:0009505	plant-type cell wall	6	349	0.017192	0.0109085	0.995678	0.421	1	RHC1A_ARATH	HIP32_ARATH	HSP7P_ARATH	HS906_ARATH	ASP63_ARATH	Q93VS8_ARATH
molecular_function	GO:0043531	ADP binding	6	328	0.0182927	0.0111603	0.995849	0.682	1	RPP1_ARATH	F4J361_ARATH	Q9M1P1_ARATH	A0A1I9LP82_ARATH	F4J359_ARATH	A0A1I9LP83_ARATH
biological_process	GO:0009749	response to glucose	6	46	0.130435	0.998217	0.00655857	1	1	FLZ8_ARATH	ABI4_ARATH	ABR1_ARATH	EIF3H_ARATH	Q8VYM7_ARATH	F4K645_ARATH
cellular_component	GO:0090406	pollen tube	6	67	0.0895522	0.933794	0.147067	1	1	PHE1_ARATH	CAP3_ARATH	IOS1_ARATH	REN1_ARATH	MY120_ARATH	Q9LQP9_ARATH
biological_process	GO:0018105	peptidyl-serine phosphorylation	6	102	0.0588235	0.839133	0.290436	1	1	CSK2P_ARATH	TSL_ARATH	CDPK9_ARATH	Q8RX85_ARATH	Q8VYJ6_ARATH	Q9LW66_ARATH
biological_process	GO:0045087	innate immune response	6	98	0.0612245	0.84631	0.231218	1	1	PRP16_ARATH	TRF1A_ARATH	TRF1B_ARATH	AHL27_ARATH	AGO1_ARATH	AHL15_ARATH
biological_process	GO:0006629	lipid metabolic process	6	167	0.0359281	1.80517e-08	1	0	1	PTN2B_ARATH	BKI1_ARATH	GCR1_ARATH	A8MQF2_ARATH	Q9SJ35_ARATH	Q9SRS6_ARATH
biological_process	GO:0051726	regulation of cell cycle	6	42	0.142857	0.999935	0.000165042	1	0.18	RBR1_ARATH	CSK2P_ARATH	DPA_ARATH	DPB_ARATH	CKS1_ARATH	F4J8Q4_ARATH
biological_process	GO:0009617	response to bacterium	6	130	0.0461538	0.69485	0.383769	1	1	ERD15_ARATH	LUH_ARATH	SEUSS_ARATH	WRK48_ARATH	LOL2_ARATH	LEUNG_ARATH
biological_process	GO:0009845	seed germination	6	80	0.075	0.999994	1.97913e-05	1	0.025	GEML5_ARATH	PERK4_ARATH	PTBP2_ARATH	SMAX1_ARATH	UNE10_ARATH	Q8RWV9_ARATH
biological_process	GO:0009751	response to salicylic acid	6	110	0.0545455	0.5861	0.557194	1	1	WRK54_ARATH	WRKY4_ARATH	MD15A_ARATH	EF113_ARATH	Q9LZ21_ARATH	Q9M9A3_ARATH
biological_process	GO:0009553	embryo sac development	6	71	0.084507	0.990124	0.0228072	1	1	RBR1_ARATH	FPA_ARATH	APC1_ARATH	AHP1_ARATH	Q9FM57_ARATH	F4HU48_ARATH
biological_process	GO:0009867	jasmonic acid mediated signaling pathway	6	76	0.0789474	0.952509	0.0972846	1	1	LBD20_ARATH	MED25_ARATH	UBP12_ARATH	UBP13_ARATH	TA12B_ARATH	GL3_ARATH
cellular_component	GO:0005802	trans-Golgi network	6	268	0.0223881	0.051977	0.976946	0.964	1	MTV1_ARATH	BIG4_ARATH	EPN1_ARATH	Q2HIG7_ARATH	F4KHR9_ARATH	F4JHZ4_ARATH
molecular_function	GO:0042393	histone binding	6	92	0.0652174	0.777639	0.369628	1	1	FAS1_ARATH	AHL27_ARATH	CKS1_ARATH	C3H19_ARATH	EIN3_ARATH	Q9M9N3_ARATH
biological_process	GO:0048510	regulation of timing of transition from vegetative to reproductive phase	6	44	0.136364	0.997461	0.0109015	1	1	PHL_ARATH	FLD_ARATH	BLH3_ARATH	EAF1A_ARATH	EAF1B_ARATH	AGL63_ARATH
cellular_component	GO:0010494	cytoplasmic stress granule	6	26	0.230769	0.999932	0.000567063	1	0.108	RH6_ARATH	RH8_ARATH	RH12_ARATH	RB47A_ARATH	RB47B_ARATH	CID4_ARATH
[truncated: 7,380 more rows]
[truncated: 538 more columns]

## Sheet: polyQ⁄N
GO domain	GO ID	GO term	polyQ⁄N protein	total number	number / total	raw p-value under-representation	raw p-value over-representation	FWER under-representation	FWER over-representation	Gene Name
[truncated: 7,577 more rows]
[truncated: 1,652 more columns]

[truncated: 19 more sheets: polyN, polyY, polyW, polyC, polyP, polyA, polyS, polyT, polyD, polyE, polyG, polyF, polyH, polyI, polyL, polyV, polyM, polyR, polyK]
