# Supplementary material for: Noncanonical usage of stop codons in ciliates expands proteins with Q-rich motifs
Source: bioRxiv preprint, doi:10.1101/2020.12.08.407247, version 3 (2023-11-13)
Supplement: Dataset DS32 [file 407247_file46.xlsx]

## Sheet: SCD
GO domain	GO ID	GO term	SCD protein	total number	number / total	raw p-value under-representation	raw p-value over-representation	FWER under-representation	FWER over-representation	Gene Name
cellular_component	GO:0016021	integral component of membrane	378	2821	0.133995	0.231981	0.78776	1	1	ATPF_CHLRE	PSBD_CHLRE	A0A2K3CR29_CHLRE	A8IVB2_CHLRE	Q6PLP7_CHLRE	A8JFQ9_CHLRE	A2I2U7_CHLRE	A8JBV5_CHLRE	A0A2K3DM93_CHLRE	A8J0V9_CHLRE	A8IDS5_CHLRE	A0A2K3D0S4_CHLRE	A8HXK4_CHLRE	A0A2K3DA11_CHLRE	A0A2K3DX94_CHLRE	A8JFE2_CHLRE	A0A2K3DRC9_CHLRE	A0A2K3D768_CHLRE	A8I205_CHLRE	A0A2K3D7U2_CHLRE	A0A2K3E3K8_CHLRE	A0A2K3E3G9_CHLRE	A0A2K3DJ21_CHLRE	A0A2K3E151_CHLRE	A0A2K3DCV3_CHLRE	A0A2K3DXX2_CHLRE	A0A2K3DR82_CHLRE	A0A2K3DX96_CHLRE	A0A2K3D0U8_CHLRE	A0A2K3CZE5_CHLRE	A0A2K3E1I8_CHLRE	A0A2K3DS69_CHLRE	A0A2K3D7L3_CHLRE	A0A2K3DBP8_CHLRE	A0A2K3DA34_CHLRE	A0A2K3D134_CHLRE	A0A2K3DUR6_CHLRE	A0A2K3DHK9_CHLRE	A0A2K3E106_CHLRE	A0A2K3CUN0_CHLRE
molecular_function	GO:0005524	ATP binding	286	1465	0.195222	1	8.83558e-11	1	0	ATPA_CHLRE	ATPF_CHLRE	CHLB_CHLRE	A8IMZ5_CHLRE	A8ICD8_CHLRE	A8J168_CHLRE	Q9LLL6_CHLRE	A8J1X8_CHLRE	A8JCQ8_CHLRE	A8I3N6_CHLRE	Q7X931_CHLRE	A0A2K3D7U2_CHLRE	A8HM54_CHLRE	A0A2K3D5V4_CHLRE	A0A2K3DYD5_CHLRE	A0A2K3DAX3_CHLRE	A0A2K3DVV1_CHLRE	A0A2K3DXM3_CHLRE	A0A2K3D3N5_CHLRE	A0A2K3E8I8_CHLRE	A0A2K3DIC1_CHLRE	A0A2K3DCL3_CHLRE	A0A2K3DJB1_CHLRE	A0A2K3E2P6_CHLRE	A0A2K3DS51_CHLRE	A0A2K3CSP4_CHLRE	A0A2K3CY97_CHLRE	A0A2K3DEW9_CHLRE	A0A2K3DUE2_CHLRE	A0A2K3DF85_CHLRE	A0A2K3DWM0_CHLRE	A0A2K3D5D3_CHLRE	A0A2K3DF38_CHLRE	A0A2K3E5D4_CHLRE	A0A2K3D408_CHLRE	A0A2K3DXT5_CHLRE	A0A2K3E5B6_CHLRE	A0A2K3E613_CHLRE	A0A2K3E6D5_CHLRE	A0A2K3DIS2_CHLRE
cellular_component	GO:0005634	nucleus	238	1201	0.198168	1	5.0278e-07	1	0	A0A2K3DGV5_CHLRE	A0A2K3DGU5_CHLRE	B1B5J6_CHLRE	A0A0U2Q5E3_CHLRE	A0A098_CHLRE	A8J2W2_CHLRE	A8I9W8_CHLRE	A8J6A2_CHLRE	A8J3F8_CHLRE	A0A2K3DU19_CHLRE	A8I3Q0_CHLRE	A0A2K3DYD5_CHLRE	A0A2K3DVV1_CHLRE	A0A2K3D1W7_CHLRE	A0A2K3CSY6_CHLRE	A0A2K3E6P6_CHLRE	A0A2K3D9Y5_CHLRE	A0A2K3DIC1_CHLRE	A0A2K3E2P6_CHLRE	A0A2K3CPZ5_CHLRE	A0A2K3DHX0_CHLRE	A0A2K3DUE2_CHLRE	A0A2K3DWM0_CHLRE	A0A2K3CVU2_CHLRE	A0A2K3DUT4_CHLRE	A0A2K3E2T6_CHLRE	A0A2K3DDI1_CHLRE	A0A2K3DGS3_CHLRE	A0A2K3CY22_CHLRE	A0A2K3E5B6_CHLRE	A0A2K3E7Y1_CHLRE	A0A2K3E6D5_CHLRE	A0A2K3DGT4_CHLRE	A0A2K3DP94_CHLRE	A0A2K3CYK0_CHLRE	A0A2K3E1T4_CHLRE	A0A2K3DKX2_CHLRE	A0A2K3DYA1_CHLRE	A0A2K3E736_CHLRE	A0A2K3CQV0_CHLRE
cellular_component	GO:0005737	cytoplasm	207	1425	0.145263	1.46884e-12	1	0	1	CCD61_CHLRE	U3U3P6_CHLRE	A8IXY0_CHLRE	Q45QX3_CHLRE	A8J168_CHLRE	A8J2W2_CHLRE	A0A2K3D9X2_CHLRE	A8I9W8_CHLRE	A8J3F8_CHLRE	A8HYK1_CHLRE	A8IHL1_CHLRE	A8HUC9_CHLRE	Q9SWH3_CHLRE	A0A2K3D5V4_CHLRE	A0A2K3DYD5_CHLRE	A0A2K3DVV1_CHLRE	A0A2K3CSY6_CHLRE	A0A2K3E8I8_CHLRE	A0A2K3DIC1_CHLRE	A0A2K3CZA3_CHLRE	A0A2K3E2P6_CHLRE	A0A2K3CY97_CHLRE	A0A2K3DHX0_CHLRE	A0A2K3DUE2_CHLRE	A0A2K3DF85_CHLRE	A0A2K3E5Z1_CHLRE	A0A2K3DF38_CHLRE	A0A2K3E5D4_CHLRE	A0A2K3E5B6_CHLRE	A0A2K3DIS2_CHLRE	A0A2K3E0P6_CHLRE	A0A2K3E2R6_CHLRE	A0A2K3E1T4_CHLRE	A0A2K3DYA1_CHLRE	A0A2K3CUR8_CHLRE	A0A2K3DNA7_CHLRE	A0A2K3D3Z2_CHLRE	A0A2K3D1M9_CHLRE	A0A2K3DJ60_CHLRE	A0A2K3D4L9_CHLRE
molecular_function	GO:0046872	metal ion binding	120	780	0.153846	0.361136	0.670023	1	1	CHLB_CHLRE	RPC1A_CHLRE	A0A0U2Q5E3_CHLRE	Q9ATG5_CHLRE	Q75NZ1_CHLRE	A8JIK2_CHLRE	A8HY41_CHLRE	Q2HZ21_CHLRE	A0A2K3CRN7_CHLRE	A0A2K3E3K8_CHLRE	A0A2K3D1W7_CHLRE	A0A2K3E8I8_CHLRE	A0A2K3DSQ6_CHLRE	A0A2K3D6S1_CHLRE	A0A2K3CQX7_CHLRE	A0A2K3E2U1_CHLRE	A0A2K3DPE5_CHLRE	A0A2K3D6G4_CHLRE	A0A2K3CYG6_CHLRE	A0A2K3DLA1_CHLRE	A0A2K3DMB9_CHLRE	A0A2K3CR97_CHLRE	A0A2K3D4L9_CHLRE	A0A2K3E0V0_CHLRE	A0A2K3E231_CHLRE	A0A2K3DY33_CHLRE	A0A2K3D2M9_CHLRE	A0A2K3DI14_CHLRE	A0A2K3DQR5_CHLRE	A0A2K3DVB8_CHLRE	A0A2K3D800_CHLRE	A0A2K3E2T3_CHLRE	A0A2K3DW76_CHLRE	A0A2K3E7V4_CHLRE	A0A2K3CUG8_CHLRE	A0A2K3DPC6_CHLRE	A0A2K3CYG4_CHLRE	A0A2K3D6T3_CHLRE	A0A2K3DA03_CHLRE	A0A2K3E402_CHLRE
molecular_function	GO:0004674	protein serine/threonine kinase activity	102	413	0.246973	1	2.08331e-09	1	0	A0A2K3DVV1_CHLRE	A0A2K3DIC1_CHLRE	A0A2K3DCL3_CHLRE	A0A2K3DS51_CHLRE	A0A2K3CSP4_CHLRE	A0A2K3DUE2_CHLRE	A0A2K3E5D4_CHLRE	A0A2K3DIS2_CHLRE	A0A2K3E1T4_CHLRE	A0A2K3CP24_CHLRE	A0A2K3DNJ6_CHLRE	A0A2K3DRM4_CHLRE	A0A2K3DYA1_CHLRE	A0A2K3DQZ1_CHLRE	A0A2K3DE59_CHLRE	A0A2K3E6S6_CHLRE	A0A2K3CW77_CHLRE	A0A2K3DQ34_CHLRE	A0A2K3DSM8_CHLRE	A0A2K3CWF0_CHLRE	A0A2K3E2K1_CHLRE	A0A2K3E4B8_CHLRE	A0A2K3D9X8_CHLRE	A0A2K3DBV1_CHLRE	A0A2K3CZQ7_CHLRE	A0A2K3E2G3_CHLRE	A0A2K3CPH3_CHLRE	A0A2K3E111_CHLRE	A0A2K3E6R3_CHLRE	A0A2K3CZ56_CHLRE	A0A2K3DDB5_CHLRE	A0A2K3DHY5_CHLRE	A0A2K3E252_CHLRE	A0A2K3D2P4_CHLRE	A0A2K3CYH3_CHLRE	A0A2K3DKI7_CHLRE	A0A2K3DZ07_CHLRE	A0A2K3DR46_CHLRE	A0A2K3D6S0_CHLRE	A0A2K3E3Q1_CHLRE
molecular_function	GO:0004672	protein kinase activity	99	428	0.231308	1	1.24849e-11	1	0	A8I3N6_CHLRE	A0A2K3D7U2_CHLRE	A0A2K3DCL3_CHLRE	A0A2K3CSP4_CHLRE	A0A2K3DF85_CHLRE	A0A2K3DF38_CHLRE	A0A2K3E2R6_CHLRE	A0A2K3CY63_CHLRE	A0A2K3CP24_CHLRE	A0A2K3DNJ6_CHLRE	A0A2K3DRM4_CHLRE	A0A2K3DQZ1_CHLRE	A0A2K3D7I3_CHLRE	A0A2K3DSM8_CHLRE	A0A2K3CWF0_CHLRE	A0A2K3DQ77_CHLRE	A0A2K3E4B8_CHLRE	A0A2K3DVE5_CHLRE	A0A2K3E2G3_CHLRE	A0A2K3CVF9_CHLRE	A0A2K3CXA7_CHLRE	A0A2K3E111_CHLRE	A0A2K3CY65_CHLRE	A0A2K3CVD0_CHLRE	A0A2K3D017_CHLRE	A0A2K3E6R3_CHLRE	A0A2K3DDB5_CHLRE	A0A2K3DHY5_CHLRE	A0A2K3E252_CHLRE	A0A2K3CYH3_CHLRE	A0A2K3DKI7_CHLRE	A0A2K3D4W4_CHLRE	A0A2K3DZQ9_CHLRE	A0A2K3CY62_CHLRE	A0A2K3DR46_CHLRE	A0A2K3D6S0_CHLRE	A0A2K3DZR0_CHLRE	A0A2K3CPI6_CHLRE	A0A2K3DIY8_CHLRE	A0A2K3CZA1_CHLRE
biological_process	GO:0035556	intracellular signal transduction	97	260	0.373077	1	4.59861e-21	1	0	A0A2K3DZK2_CHLRE	A0A2K3E041_CHLRE	A0A2K3D1J0_CHLRE	A0A2K3DJ21_CHLRE	A0A2K3DIC1_CHLRE	A0A2K3CZA3_CHLRE	A0A2K3E2P6_CHLRE	A0A2K3DS51_CHLRE	A0A2K3DUE2_CHLRE	A0A2K3DMQ2_CHLRE	A0A2K3E5B6_CHLRE	A0A2K3DZC9_CHLRE	A0A2K3DVL3_CHLRE	A0A2K3E1T4_CHLRE	A0A2K3CXF1_CHLRE	A0A2K3E6S6_CHLRE	A0A2K3DQ34_CHLRE	A0A2K3DYE9_CHLRE	A0A2K3DMM0_CHLRE	A0A2K3E603_CHLRE	A0A2K3D9X8_CHLRE	A0A2K3CZQ7_CHLRE	A0A2K3D264_CHLRE	A0A2K3D504_CHLRE	A0A2K3D1J3_CHLRE	A0A2K3CPH3_CHLRE	A0A2K3DKX7_CHLRE	A0A2K3DGE9_CHLRE	A0A2K3E1B0_CHLRE	A0A2K3CZW6_CHLRE	A0A2K3DB70_CHLRE	A0A2K3DIV2_CHLRE	A0A2K3D1K0_CHLRE	A0A2K3CRD4_CHLRE	A0A2K3DDI4_CHLRE	A0A2K3E6E7_CHLRE	A0A2K3D2P4_CHLRE	A0A2K3E282_CHLRE	A0A2K3DUT0_CHLRE	A0A2K3E290_CHLRE
molecular_function	GO:0003677	DNA binding	78	376	0.207447	1	2.48045e-10	1	0	RPOB1_CHLRE	RPC1A_CHLRE	A8I3Q0_CHLRE	A0A2K3D1W7_CHLRE	A0A2K3D4R7_CHLRE	A0A2K3CPZ5_CHLRE	A0A2K3D6S1_CHLRE	A0A2K3DP94_CHLRE	A0A2K3E264_CHLRE	A0A2K3D4L9_CHLRE	A0A2K3D5X4_CHLRE	A0A2K3DAJ1_CHLRE	A0A2K3DY33_CHLRE	A0A2K3D4Z3_CHLRE	A0A2K3DR39_CHLRE	A0A2K3DV71_CHLRE	A0A2K3E495_CHLRE	A0A2K3CXE8_CHLRE	A0A2K3E275_CHLRE	A0A2K3DXP3_CHLRE	A0A2K3DUT8_CHLRE	A0A2K3E519_CHLRE	A0A2K3CNA2_CHLRE	A0A2K3E5F5_CHLRE	A0A2K3DA03_CHLRE	A0A2K3D3P2_CHLRE	A0A2K3D2C0_CHLRE	A0A2K3CZM9_CHLRE	A0A2K3CRE2_CHLRE	A0A2K3DLW7_CHLRE	A0A2K3DKW4_CHLRE	A0A2K3DJH5_CHLRE	A0A2K3CUN5_CHLRE	A0A2K3DWI1_CHLRE	A0A2K3D2G9_CHLRE	A0A2K3DZL3_CHLRE	A0A2K3DKN3_CHLRE	A0A2K3CQN2_CHLRE	A0A2K3CNN9_CHLRE	A0A2K3E133_CHLRE
cellular_component	GO:0005886	plasma membrane	67	257	0.2607	1	1.60073e-08	1	0	A0A2K3DZK2_CHLRE	A2I2U7_CHLRE	A0A2K3E041_CHLRE	A0A2K3D1J0_CHLRE	A0A2K3DJ21_CHLRE	A0A2K3DXX2_CHLRE	A0A2K3D216_CHLRE	A0A2K3D0H4_CHLRE	A0A2K3CZE5_CHLRE	A0A2K3DMQ2_CHLRE	A0A2K3D1Y1_CHLRE	A0A2K3E3R5_CHLRE	A0A2K3DTH6_CHLRE	A0A2K3DVL3_CHLRE	A0A2K3DSM2_CHLRE	A0A2K3DLJ0_CHLRE	A0A2K3D6T2_CHLRE	A0A2K3DMM0_CHLRE	A0A2K3DDQ0_CHLRE	A0A2K3D264_CHLRE	A0A2K3CVT5_CHLRE	A0A2K3CUZ0_CHLRE	A0A2K3E1B0_CHLRE	A0A2K3CZW6_CHLRE	A0A2K3CZZ8_CHLRE	A0A2K3D1K0_CHLRE	A0A2K3DPQ3_CHLRE	A0A2K3CQ89_CHLRE	A0A2K3CUI6_CHLRE	A0A2K3E3P1_CHLRE	A0A2K3E290_CHLRE	A0A2K3CPF2_CHLRE	A0A2K3E1E3_CHLRE	A0A2K3D8J2_CHLRE	A0A2K3D4L1_CHLRE	A0A2K3CW68_CHLRE	A0A2K3DLK3_CHLRE	A0A2K3DN94_CHLRE	A0A2K3CXC9_CHLRE	A0A2K3DMM2_CHLRE
biological_process	GO:0007165	signal transduction	61	188	0.324468	1	1.81882e-21	1	0	A0A2K3DZK2_CHLRE	A8HS05_CHLRE	A0A2K3E041_CHLRE	A0A2K3D1J0_CHLRE	A0A2K3D1H8_CHLRE	A0A2K3E3K8_CHLRE	A0A2K3DJ21_CHLRE	A0A2K3DMQ2_CHLRE	A0A2K3DF85_CHLRE	A0A2K3DF38_CHLRE	A0A2K3E2U1_CHLRE	A0A2K3DVL3_CHLRE	A0A2K3E2R6_CHLRE	A0A2K3D5H8_CHLRE	A0A2K3D7I3_CHLRE	A0A2K3DSM8_CHLRE	A0A2K3D2M9_CHLRE	A0A2K3DMM0_CHLRE	A0A2K3D1G5_CHLRE	A0A2K3D264_CHLRE	A0A2K3E1B0_CHLRE	A0A2K3CZW6_CHLRE	A0A2K3D1K0_CHLRE	A0A2K3E290_CHLRE	A0A2K3E402_CHLRE	A0A2K3E1E3_CHLRE	A0A2K3DZQ9_CHLRE	A0A2K3DKM3_CHLRE	A0A2K3D7N5_CHLRE	A0A2K3D8J2_CHLRE	A0A2K3DAN5_CHLRE	A0A2K3E4B4_CHLRE	A0A2K3D4L1_CHLRE	A0A2K3CW68_CHLRE	A0A2K3DWT4_CHLRE	A0A2K3DMM2_CHLRE	A0A2K3CXH0_CHLRE	A0A2K3CV76_CHLRE	A0A2K3CV59_CHLRE	A0A2K3D6D7_CHLRE
molecular_function	GO:0003723	RNA binding	60	459	0.130719	0.0152704	0.988547	0.815	1	RR3_CHLRE	A8J144_CHLRE	A8J1X8_CHLRE	A8IC90_CHLRE	A8HTG7_CHLRE	A8I645_CHLRE	A0A2K3D9H6_CHLRE	A0A2K3DCZ3_CHLRE	A0A2K3D5D3_CHLRE	A0A2K3CWS9_CHLRE	A0A2K3D408_CHLRE	A0A2K3CSM4_CHLRE	A0A2K3D388_CHLRE	A0A2K3DKJ5_CHLRE	A0A2K3D4L9_CHLRE	A0A2K3CWQ8_CHLRE	A0A2K3DPN5_CHLRE	A0A2K3D159_CHLRE	A0A2K3CWS1_CHLRE	A0A2K3CWP5_CHLRE	A0A2K3CZ19_CHLRE	A0A2K3DYQ0_CHLRE	A0A2K3E781_CHLRE	A0A2K3D2Z7_CHLRE	A0A2K3CXJ9_CHLRE	A0A2K3DLF9_CHLRE	A0A2K3D946_CHLRE	A0A2K3DJV1_CHLRE	A0A2K3DKB1_CHLRE	A0A2K3E2R3_CHLRE	A0A2K3DXU4_CHLRE	A0A2K3CWN3_CHLRE	A0A2K3E844_CHLRE	A0A2K3CYN2_CHLRE	A0A2K3D8E4_CHLRE	A0A2K3CSN9_CHLRE	A0A2K3D7K3_CHLRE	A0A2K3E1G4_CHLRE	A0A2K3CSQ1_CHLRE	A0A2K3DE22_CHLRE
cellular_component	GO:0016020	membrane	56	492	0.113821	0.735521	0.285769	1	1	A0A2K3DA82_CHLRE	A0A2K3E7N6_CHLRE	A0A2K3D1H8_CHLRE	A0A2K3E7H5_CHLRE	A0A2K3E7J5_CHLRE	A0A2K3CXR9_CHLRE	A0A2K3D5H8_CHLRE	A0A2K3DCL8_CHLRE	A0A2K3DJA5_CHLRE	A0A2K3D195_CHLRE	A0A2K3DSZ2_CHLRE	A0A2K3CPA0_CHLRE	A0A2K3DTR7_CHLRE	A0A2K3CZZ8_CHLRE	A0A2K3D8P1_CHLRE	A0A2K3DT99_CHLRE	A0A2K3E4S5_CHLRE	A0A2K3D9V6_CHLRE	A0A2K3E635_CHLRE	A0A2K3E6T4_CHLRE	A0A2K3DSA5_CHLRE	A0A2K3DLK3_CHLRE	A0A2K3CUL6_CHLRE	A0A2K3DP45_CHLRE	A0A2K3CWJ4_CHLRE	A0A2K3D1W5_CHLRE	A0A2K3E7P9_CHLRE	A0A2K3DEH1_CHLRE	A0A2K3CYQ1_CHLRE	A0A2K3CPH1_CHLRE	A0A2K3DS95_CHLRE	A0A2K3DU40_CHLRE	A0A2K3E4G9_CHLRE	A0A2K3CYD2_CHLRE	A0A2K3D2X0_CHLRE	A0A2K3D9V3_CHLRE	A0A2K3DB34_CHLRE	A0A2K3E7K9_CHLRE	A0A2K3DB74_CHLRE	A0A2K3CP98_CHLRE
molecular_function	GO:0016887	ATP hydrolysis activity	47	225	0.208889	0.999865	0.000215396	1	0.052	A8HM54_CHLRE	A0A2K3DEW9_CHLRE	A0A2K3E613_CHLRE	A0A2K3E6D5_CHLRE	A0A2K3E645_CHLRE	A0A2K3D4L9_CHLRE	A0A2K3D646_CHLRE	A0A2K3DN16_CHLRE	A0A2K3DWY1_CHLRE	A0A2K3DFZ5_CHLRE	A0A2K3D249_CHLRE	A0A2K3DDD4_CHLRE	A0A2K3DIP5_CHLRE	A0A2K3DJH8_CHLRE	A0A2K3DG81_CHLRE	A0A2K3E1F5_CHLRE	A0A2K3E3D8_CHLRE	A0A2K3D295_CHLRE	A0A2K3DXU4_CHLRE	A0A2K3CUN5_CHLRE	A0A2K3DWL0_CHLRE	A0A2K3D4E3_CHLRE	A0A2K3E1W0_CHLRE	A0A2K3CNE1_CHLRE	A0A2K3E1Z3_CHLRE	A0A2K3CYD2_CHLRE	A0A2K3CV78_CHLRE	A0A2K3DQ37_CHLRE	A0A2K3CRT3_CHLRE	A0A2K3CVD3_CHLRE	A0A2K3DKS6_CHLRE	A0A2K3DZP9_CHLRE	A0A2K3E158_CHLRE	A0A2K3DAG5_CHLRE	A0A2K3E1F7_CHLRE	A0A2K3E7T4_CHLRE	A0A2K3DZD8_CHLRE	A0A2K3DSK9_CHLRE	A0A2K3DQN1_CHLRE	A0A2K3DAG6_CHLRE
cellular_component	GO:0009507	chloroplast	44	354	0.124294	0.325187	0.717745	1	1	CHLB_CHLRE	RPOB1_CHLRE	RPC1A_CHLRE	RR2A_CHLRE	RR3_CHLRE	YCX9_CHLRE	A8I5N5_CHLRE	Q9LLL6_CHLRE	A8J144_CHLRE	A8HRQ4_CHLRE	Q2HZ21_CHLRE	A0A2K3D9H6_CHLRE	A0A2K3DCZ3_CHLRE	A0A2K3D6S1_CHLRE	A0A2K3CWS9_CHLRE	A0A2K3CWQ8_CHLRE	A0A2K3DHQ0_CHLRE	A0A2K3CWS1_CHLRE	A0A2K3CWP5_CHLRE	A0A2K3E0D8_CHLRE	A0A2K3D5I0_CHLRE	A0A2K3CW66_CHLRE	A0A2K3D2Z7_CHLRE	A0A2K3CXJ9_CHLRE	A0A2K3CVZ5_CHLRE	A0A2K3DJV1_CHLRE	A0A2K3DU45_CHLRE	A0A2K3DQP9_CHLRE	A0A2K3E2R3_CHLRE	A0A2K3CUL6_CHLRE	A0A2K3E6U4_CHLRE	A0A2K3CWN3_CHLRE	A0A2K3DE22_CHLRE	A0A2K3CZ15_CHLRE	A0A2K3DB48_CHLRE	A0A2K3CQL5_CHLRE	A0A2K3CWN9_CHLRE	A0A2K3CZC2_CHLRE	A0A2K3CQV1_CHLRE	A0A2K3CV32_CHLRE
biological_process	GO:0006355	regulation of transcription, DNA-templated	43	141	0.304965	1	3.32366e-10	1	0	A8IMK5_CHLRE	A0A2K3D0S4_CHLRE	A0A2K3DA11_CHLRE	A0A2K3D1W7_CHLRE	A0A2K3D0U8_CHLRE	A0A2K3E2T6_CHLRE	A0A2K3DDI1_CHLRE	A0A2K3D851_CHLRE	A0A2K3E7W8_CHLRE	A0A2K3DHC0_CHLRE	A0A2K3DTF3_CHLRE	A0A2K3DWD9_CHLRE	A0A2K3DNY8_CHLRE	A0A2K3E6H8_CHLRE	A0A2K3DPP5_CHLRE	A0A2K3DNZ3_CHLRE	A0A2K3DEV4_CHLRE	A0A2K3E3P9_CHLRE	A0A2K3DUR5_CHLRE	A0A2K3DDP7_CHLRE	A0A2K3D681_CHLRE	A0A2K3DJH5_CHLRE	A0A2K3DV55_CHLRE	A0A2K3D5C6_CHLRE	A0A2K3CX47_CHLRE	A0A2K3DER0_CHLRE	A0A2K3DYQ3_CHLRE	A0A2K3DEF3_CHLRE	A0A2K3D884_CHLRE	A0A2K3DGK7_CHLRE	A0A2K3DEE7_CHLRE	A0A2K3D0R9_CHLRE	A0A2K3DEN5_CHLRE	A0A2K3D0V2_CHLRE	A0A2K3DEV2_CHLRE	A0A2K3DEE9_CHLRE	A0A2K3CVA7_CHLRE	A0A2K3DIY3_CHLRE	A0A2K3CZF6_CHLRE	A0A2K3DCV9_CHLRE
biological_process	GO:0009190	cyclic nucleotide biosynthetic process	38	68	0.558824	1	9.49448e-26	1	0	A0A2K3DZC9_CHLRE	A0A2K3CXF1_CHLRE	A0A2K3D8G4_CHLRE	A0A2K3DYE9_CHLRE	A0A2K3E603_CHLRE	A0A2K3D504_CHLRE	A0A2K3D1J3_CHLRE	A0A2K3DKX7_CHLRE	A0A2K3DGE9_CHLRE	A0A2K3DB70_CHLRE	A0A2K3DIV2_CHLRE	A0A2K3DDI4_CHLRE	A0A2K3E6E7_CHLRE	A0A2K3E282_CHLRE	A0A2K3E6Y2_CHLRE	A0A2K3DC65_CHLRE	A0A2K3DXD8_CHLRE	A0A2K3CVA6_CHLRE	A0A2K3DII6_CHLRE	A0A2K3E165_CHLRE	A0A2K3D535_CHLRE	A0A2K3DN94_CHLRE	A0A2K3DYX1_CHLRE	A0A2K3DZA2_CHLRE	A0A2K3DJT8_CHLRE	A0A2K3E5P8_CHLRE	A0A2K3E2G0_CHLRE	A0A2K3DLP7_CHLRE	A0A2K3DIJ1_CHLRE	A0A2K3E877_CHLRE	A0A2K3DYL3_CHLRE	A0A2K3CWD4_CHLRE	A0A2K3D4Z9_CHLRE	A0A2K3DLN2_CHLRE	A0A2K3DZ97_CHLRE	A0A2K3DEN3_CHLRE	A0A2K3DF47_CHLRE	A0A2K3CYL6_CHLRE
molecular_function	GO:0004383	guanylate cyclase activity	32	68	0.470588	1	5.36973e-11	1	0	A0A2K3DZK2_CHLRE	A0A2K3E041_CHLRE	A0A2K3D1J0_CHLRE	A0A2K3DJ21_CHLRE	A0A2K3CZA3_CHLRE	A0A2K3DMQ2_CHLRE	A0A2K3DVL3_CHLRE	A0A2K3DMM0_CHLRE	A0A2K3D264_CHLRE	A0A2K3E1B0_CHLRE	A0A2K3CZW6_CHLRE	A0A2K3D1K0_CHLRE	A0A2K3E290_CHLRE	A0A2K3E1E3_CHLRE	A0A2K3D8J2_CHLRE	A0A2K3D4L1_CHLRE	A0A2K3CW68_CHLRE	A0A2K3CU48_CHLRE	A0A2K3DMM2_CHLRE	A0A2K3CXH0_CHLRE	A0A2K3CV76_CHLRE	A0A2K3CV59_CHLRE	A0A2K3D6D7_CHLRE	A0A2K3CUZ3_CHLRE	A0A2K3D9W4_CHLRE	A0A2K3DS75_CHLRE	A0A2K3DJD5_CHLRE	A0A2K3D3W8_CHLRE	A0A2K3DT08_CHLRE	A0A2K3D6F2_CHLRE	A0A2K3CXE2_CHLRE	A0A2K3E649_CHLRE
molecular_function	GO:0016301	kinase activity	32	123	0.260163	1	2.18143e-12	1	0	A8I368_CHLRE	A0A2K3CQX7_CHLRE	A0A2K3CYG6_CHLRE	A0A2K3CR97_CHLRE	A0A2K3E0V0_CHLRE	A0A2K3DI14_CHLRE	A0A2K3D800_CHLRE	A0A2K3DY27_CHLRE	A0A2K3CYG4_CHLRE	A0A2K3DFR0_CHLRE	A0A2K3DTF9_CHLRE	A0A2K3DKR7_CHLRE	A0A2K3CWR3_CHLRE	A0A2K3D715_CHLRE	A0A2K3CYC0_CHLRE	A0A2K3CYK8_CHLRE	A0A2K3CYG8_CHLRE	A0A2K3CRM6_CHLRE	A0A2K3DKQ6_CHLRE	A0A2K3DF34_CHLRE	A0A2K3D838_CHLRE	A0A2K3DKR3_CHLRE	A0A2K3DKV7_CHLRE	A0A2K3DST4_CHLRE	A0A2K3DX67_CHLRE	A0A2K3CRN4_CHLRE	A0A2K3CYN6_CHLRE	A0A2K3E138_CHLRE	A0A2K3DFQ2_CHLRE	A0A2K3DKQ0_CHLRE	A0A2K3CYE1_CHLRE	A0A2K3CYN8_CHLRE
molecular_function	GO:0003700	DNA-binding transcription factor activity	31	92	0.336957	1	6.02773e-09	1	0	A0A2K3DGV5_CHLRE	A0A2K3DGU5_CHLRE	Q65Z16_CHLRE	A0A2K3DU19_CHLRE	A0A2K3DGS3_CHLRE	A0A2K3DGT4_CHLRE	A0A2K3DAJ1_CHLRE	A0A2K3DGT5_CHLRE	A0A2K3DV71_CHLRE	A0A2K3DGR0_CHLRE	A0A2K3D7C0_CHLRE	A0A2K3DGS1_CHLRE	A0A2K3E275_CHLRE	A0A2K3DIU5_CHLRE	A0A2K3E5F5_CHLRE	A0A2K3DBG2_CHLRE	A0A2K3D5Q1_CHLRE	A0A2K3E4M1_CHLRE	A0A2K3DGU9_CHLRE	A0A2K3DQA9_CHLRE	A0A2K3DGS5_CHLRE	A0A2K3DVL0_CHLRE	A0A2K3CNN9_CHLRE	A0A2K3CUG0_CHLRE	A0A2K3DAG2_CHLRE	A0A2K3D369_CHLRE	A0A2K3E5D6_CHLRE	A0A2K3CSK2_CHLRE	A0A2K3DGS0_CHLRE	A8IW62_CHLRE	A0A2K3DQN8_CHLRE
molecular_function	GO:0008270	zinc ion binding	30	213	0.140845	0.556493	0.522869	1	1	B1B5J6_CHLRE	A8I980_CHLRE	A0A2K3E613_CHLRE	A0A2K3DSC4_CHLRE	A0A2K3D851_CHLRE	A0A2K3D646_CHLRE	A0A2K3D4Z3_CHLRE	A0A2K3DWD9_CHLRE	A0A2K3D7C0_CHLRE	A0A2K3D7C3_CHLRE	A0A2K3E6H8_CHLRE	A0A2K3DXP3_CHLRE	A0A2K3CNA2_CHLRE	A0A2K3DXX4_CHLRE	A0A2K3DXV0_CHLRE	A0A2K3DT58_CHLRE	A0A2K3DWP4_CHLRE	A0A2K3D5C6_CHLRE	A0A2K3DEF3_CHLRE	A0A2K3DEE7_CHLRE	A0A2K3DBE9_CHLRE	A0A2K3DRY9_CHLRE	A0A2K3E1C7_CHLRE	A0A2K3DZC8_CHLRE	A0A2K3DEE9_CHLRE	A0A2K3D4I9_CHLRE	A0A2K3D5Y9_CHLRE	A0A2K3DNI2_CHLRE	A0A2K3D5A0_CHLRE	A0A2K3DKK4_CHLRE
molecular_function	GO:0008017	microtubule binding	30	99	0.30303	0.999988	3.30831e-05	1	0.006	CCD61_CHLRE	A8J7M5_CHLRE	Q7X931_CHLRE	A0A2K3DJB1_CHLRE	A0A2K3D2P2_CHLRE	A0A2K3CVM7_CHLRE	A0A2K3DVM6_CHLRE	A0A2K3DWY1_CHLRE	A0A2K3DFZ5_CHLRE	A0A2K3CXA7_CHLRE	A0A2K3CZG7_CHLRE	A0A2K3DSZ2_CHLRE	A0A2K3DZE8_CHLRE	A0A2K3DJH8_CHLRE	A0A2K3DVC5_CHLRE	A0A2K3CV39_CHLRE	A0A2K3CQR3_CHLRE	A0A2K3DWL0_CHLRE	A0A2K3CNE1_CHLRE	A0A2K3E5K1_CHLRE	A0A2K3CU18_CHLRE	A0A2K3DWK7_CHLRE	A0A2K3CRT3_CHLRE	A0A2K3DZA7_CHLRE	A0A2K3DZP9_CHLRE	A0A2K3DZD8_CHLRE	A0A2K3D915_CHLRE	A0A2K3D8Z6_CHLRE	A0A2K3DR49_CHLRE	A0A2K3DC11_CHLRE
biological_process	GO:0007018	microtubule-based movement	30	79	0.379747	0.999989	2.89702e-05	1	0.011	Q7X931_CHLRE	Q5XPS1_CHLRE	A0A2K3D5V4_CHLRE	A0A2K3DJB1_CHLRE	A0A2K3CY97_CHLRE	A0A2K3CUR8_CHLRE	A0A2K3DN16_CHLRE	A0A2K3DWY1_CHLRE	A0A2K3DFZ5_CHLRE	A0A2K3D9P4_CHLRE	A0A2K3CZG7_CHLRE	A0A2K3D1N8_CHLRE	A0A2K3DV97_CHLRE	A0A2K3DZE8_CHLRE	A0A2K3DJH8_CHLRE	A0A2K3D3V2_CHLRE	A0A2K3DWL0_CHLRE	A0A2K3CNE1_CHLRE	A0A2K3DWK7_CHLRE	A0A2K3E6A9_CHLRE	A0A2K3CRT3_CHLRE	A0A2K3DZA7_CHLRE	A0A2K3CRT6_CHLRE	A0A2K3DZP9_CHLRE	A0A2K3DQQ4_CHLRE	A0A2K3DZD8_CHLRE	A0A2K3D915_CHLRE	A8J3B6_CHLRE	H6UI23_CHLRE	A0A2K3DC11_CHLRE
molecular_function	GO:0001653	peptide receptor activity	30	61	0.491803	1	5.35806e-11	1	0	A0A2K3DZK2_CHLRE	A0A2K3E041_CHLRE	A0A2K3D1J0_CHLRE	A0A2K3DJ21_CHLRE	A0A2K3DMQ2_CHLRE	A0A2K3DVL3_CHLRE	A0A2K3DMM0_CHLRE	A0A2K3D264_CHLRE	A0A2K3E1B0_CHLRE	A0A2K3CZW6_CHLRE	A0A2K3D1K0_CHLRE	A0A2K3E290_CHLRE	A0A2K3E1E3_CHLRE	A0A2K3D8J2_CHLRE	A0A2K3D4L1_CHLRE	A0A2K3CW68_CHLRE	A0A2K3DMM2_CHLRE	A0A2K3CXH0_CHLRE	A0A2K3CV76_CHLRE	A0A2K3CV59_CHLRE	A0A2K3D6D7_CHLRE	A0A2K3CUZ3_CHLRE	A0A2K3D9W4_CHLRE	A0A2K3DS75_CHLRE	A0A2K3DJD5_CHLRE	A0A2K3D3W8_CHLRE	A0A2K3DT08_CHLRE	A0A2K3D6F2_CHLRE	A0A2K3CXE2_CHLRE	A0A2K3E649_CHLRE
biological_process	GO:0006182	cGMP biosynthetic process	30	61	0.491803	1	5.09548e-11	1	0	A0A2K3DZK2_CHLRE	A0A2K3E041_CHLRE	A0A2K3D1J0_CHLRE	A0A2K3DJ21_CHLRE	A0A2K3DMQ2_CHLRE	A0A2K3DVL3_CHLRE	A0A2K3DMM0_CHLRE	A0A2K3D264_CHLRE	A0A2K3E1B0_CHLRE	A0A2K3CZW6_CHLRE	A0A2K3D1K0_CHLRE	A0A2K3E290_CHLRE	A0A2K3E1E3_CHLRE	A0A2K3D8J2_CHLRE	A0A2K3D4L1_CHLRE	A0A2K3CW68_CHLRE	A0A2K3DMM2_CHLRE	A0A2K3CXH0_CHLRE	A0A2K3CV76_CHLRE	A0A2K3CV59_CHLRE	A0A2K3D6D7_CHLRE	A0A2K3CUZ3_CHLRE	A0A2K3D9W4_CHLRE	A0A2K3DS75_CHLRE	A0A2K3DJD5_CHLRE	A0A2K3D3W8_CHLRE	A0A2K3DT08_CHLRE	A0A2K3D6F2_CHLRE	A0A2K3CXE2_CHLRE	A0A2K3E649_CHLRE
biological_process	GO:0007168	receptor guanylyl cyclase signaling pathway	30	61	0.491803	1	5.09548e-11	1	0	A0A2K3DZK2_CHLRE	A0A2K3E041_CHLRE	A0A2K3D1J0_CHLRE	A0A2K3DJ21_CHLRE	A0A2K3DMQ2_CHLRE	A0A2K3DVL3_CHLRE	A0A2K3DMM0_CHLRE	A0A2K3D264_CHLRE	A0A2K3E1B0_CHLRE	A0A2K3CZW6_CHLRE	A0A2K3D1K0_CHLRE	A0A2K3E290_CHLRE	A0A2K3E1E3_CHLRE	A0A2K3D8J2_CHLRE	A0A2K3D4L1_CHLRE	A0A2K3CW68_CHLRE	A0A2K3DMM2_CHLRE	A0A2K3CXH0_CHLRE	A0A2K3CV76_CHLRE	A0A2K3CV59_CHLRE	A0A2K3D6D7_CHLRE	A0A2K3CUZ3_CHLRE	A0A2K3D9W4_CHLRE	A0A2K3DS75_CHLRE	A0A2K3DJD5_CHLRE	A0A2K3D3W8_CHLRE	A0A2K3DT08_CHLRE	A0A2K3D6F2_CHLRE	A0A2K3CXE2_CHLRE	A0A2K3E649_CHLRE
cellular_component	GO:0005856	cytoskeleton	29	119	0.243697	0.999999	1.35689e-06	1	0	U3U3P6_CHLRE	Q9SWH3_CHLRE	A0A2K3E5Z1_CHLRE	A0A2K3E0P6_CHLRE	A0A2K3CUT1_CHLRE	A0A2K3CPY1_CHLRE	A0A2K3DR45_CHLRE	A0A2K3E1G8_CHLRE	A0A2K3CUZ1_CHLRE	A0A2K3CUZ0_CHLRE	A0A2K3CUF3_CHLRE	A0A2K3DIV2_CHLRE	A0A2K3CQ89_CHLRE	A0A2K3CWI5_CHLRE	A0A2K3D481_CHLRE	A0A2K3CRR6_CHLRE	A0A2K3E663_CHLRE	A0A2K3E3Q1_CHLRE	A0A2K3D0W2_CHLRE	A0A2K3CRS8_CHLRE	A0A2K3D0M6_CHLRE	A0A2K3CXC4_CHLRE	A0A2K3DDY5_CHLRE	A0A2K3E5Y5_CHLRE	A0A2K3D0L8_CHLRE	A0A2K3D378_CHLRE	A0A2K3D1E5_CHLRE	A8J2J7_CHLRE	A0A2K3CY45_CHLRE
biological_process	GO:0006357	regulation of transcription by RNA polymerase II	28	106	0.264151	0.999922	0.00016495	1	0.067	A0A098_CHLRE	A0A2K3CUE4_CHLRE	A0A2K3D666_CHLRE	A0A2K3E264_CHLRE	A0A2K3E7W2_CHLRE	A0A2K3D7C0_CHLRE	A0A2K3D1V9_CHLRE	A0A2K3D2K4_CHLRE	A0A2K3E5F1_CHLRE	A0A2K3DZA8_CHLRE	A0A2K3DH12_CHLRE	A0A2K3CRK4_CHLRE	A0A2K3D3A1_CHLRE	A0A2K3CZM9_CHLRE	A0A2K3D1C2_CHLRE	A0A2K3D6P5_CHLRE	A0A2K3DN88_CHLRE	A0A2K3DLP6_CHLRE	A0A2K3DFM4_CHLRE	A0A2K3CZ46_CHLRE	A0A2K3CQN2_CHLRE	A0A2K3DVX7_CHLRE	A0A2K3D274_CHLRE	A0A2K3DE24_CHLRE	A0A2K3E637_CHLRE	A0A2K3DAW9_CHLRE	A0A2K3DF47_CHLRE	A0A2K3DK56_CHLRE
molecular_function	GO:0005509	calcium ion binding	27	187	0.144385	0.61349	0.469164	1	1	A8IJV3_CHLRE	A8I368_CHLRE	A0A2K3E2P6_CHLRE	A0A2K3D2P2_CHLRE	A0A2K3D134_CHLRE	A0A2K3DLT4_CHLRE	A0A2K3E5B6_CHLRE	A0A2K3CXV2_CHLRE	A0A2K3DCR9_CHLRE	A0A2K3DXU8_CHLRE	A0A2K3DEV8_CHLRE	A0A2K3DCL8_CHLRE	A0A2K3E0B0_CHLRE	A0A2K3DPQ3_CHLRE	A0A2K3DGK5_CHLRE	A0A2K3D395_CHLRE	A0A2K3DXS4_CHLRE	A0A2K3D481_CHLRE	A0A2K3CV39_CHLRE	A0A2K3CQR3_CHLRE	A0A2K3D2Q7_CHLRE	A0A2K3CMT7_CHLRE	A0A2K3D913_CHLRE	A0A2K3D1K1_CHLRE	A0A2K3CYV6_CHLRE	A0A2K3DKD0_CHLRE	A0A2K3DXC7_CHLRE
cellular_component	GO:0031514	motile cilium	26	136	0.191176	0.965731	0.0556298	1	1	CCD61_CHLRE	A8JC52_CHLRE	U3U3P6_CHLRE	A8HNU2_CHLRE	A8JF23_CHLRE	A8IJV3_CHLRE	A8HYK1_CHLRE	Q6Y3H7_CHLRE	A8J098_CHLRE	A8J0X0_CHLRE	A9XPA7_CHLRE	Q9SWH3_CHLRE	Q5XPS1_CHLRE	A8I3Q0_CHLRE	A8IR09_CHLRE	A0A2K3D5V4_CHLRE	A0A2K3CY97_CHLRE	A0A2K3CUR8_CHLRE	A0A2K3DN16_CHLRE	A0A2K3D1N8_CHLRE	A0A2K3DV97_CHLRE	A0A2K3CXC4_CHLRE	A0A2K3DQQ4_CHLRE	A8HXB8_CHLRE	A8J3B6_CHLRE	A8HYW3_CHLRE
cellular_component	GO:0031969	chloroplast membrane	26	90	0.288889	0.997564	0.00492775	1	0.59	A0A2K3CQX7_CHLRE	A0A2K3CYG6_CHLRE	A0A2K3E0V0_CHLRE	A0A2K3DI14_CHLRE	A0A2K3D800_CHLRE	A0A2K3CYG4_CHLRE	A0A2K3DFR0_CHLRE	A0A2K3DTF9_CHLRE	A0A2K3DKR7_CHLRE	A0A2K3CWR3_CHLRE	A0A2K3CYC0_CHLRE	A0A2K3CYK8_CHLRE	A0A2K3CYG8_CHLRE	A0A2K3CRM6_CHLRE	A0A2K3DKQ6_CHLRE	A0A2K3DF34_CHLRE	A0A2K3D838_CHLRE	A0A2K3DKR3_CHLRE	A0A2K3DKV7_CHLRE	A0A2K3DX67_CHLRE	A0A2K3CRN4_CHLRE	A0A2K3CYN6_CHLRE	A0A2K3DFQ2_CHLRE	A0A2K3DKQ0_CHLRE	A0A2K3CYE1_CHLRE	A0A2K3CYN8_CHLRE
molecular_function	GO:0005044	scavenger receptor activity	25	54	0.462963	1	1.06186e-08	1	0	A0A2K3E7H5_CHLRE	A0A2K3DBP8_CHLRE	A0A2K3E7J5_CHLRE	A0A2K3CWU4_CHLRE	A0A2K3DCL8_CHLRE	A0A2K3DUX9_CHLRE	A0A2K3CPA0_CHLRE	A0A2K3DPQ3_CHLRE	A0A2K3E4S5_CHLRE	A0A2K3D9V6_CHLRE	A0A2K3DSA5_CHLRE	A0A2K3E7P9_CHLRE	A0A2K3D618_CHLRE	A0A2K3CYQ1_CHLRE	A0A2K3DS95_CHLRE	A0A2K3DU40_CHLRE	A0A2K3D9V3_CHLRE	A0A2K3DB74_CHLRE	A0A2K3DBQ5_CHLRE	A0A2K3CP98_CHLRE	A0A2K3D993_CHLRE	A0A2K3DBP7_CHLRE	A0A2K3D1Z6_CHLRE	A0A2K3DI82_CHLRE	A0A2K3CP99_CHLRE
molecular_function	GO:0009881	photoreceptor activity	24	36	0.666667	1	8.37804e-12	1	0	A0A2K3D0S4_CHLRE	A0A2K3D0U8_CHLRE	A0A2K3CZT1_CHLRE	A0A2K3D7H5_CHLRE	A0A2K3DBN2_CHLRE	A0A2K3DHC0_CHLRE	A0A2K3D9S2_CHLRE	A0A2K3DD45_CHLRE	A0A2K3DRZ0_CHLRE	A0A2K3D7H2_CHLRE	A0A2K3DGL0_CHLRE	A0A2K3DEV4_CHLRE	A0A2K3DGJ3_CHLRE	A0A2K3DGL1_CHLRE	A0A2K3D9L6_CHLRE	A0A2K3DRV7_CHLRE	A0A2K3DGK9_CHLRE	A0A2K3D884_CHLRE	A0A2K3D0R9_CHLRE	A0A2K3DGM5_CHLRE	A0A2K3D0V2_CHLRE	A0A2K3DEV2_CHLRE	A0A2K3DIY3_CHLRE	A0A2K3DGL2_CHLRE
molecular_function	GO:0003676	nucleic acid binding	23	150	0.153333	0.997796	0.00280562	1	0.678	A8INP6_CHLRE	A0A2K3DAX3_CHLRE	A0A2K3DSQ6_CHLRE	A0A2K3DF59_CHLRE	A0A2K3D646_CHLRE	A0A2K3DZS1_CHLRE	A0A2K3D249_CHLRE	A0A2K3E7S1_CHLRE	A0A2K3DY47_CHLRE	A0A2K3DXX4_CHLRE	A0A2K3DG81_CHLRE	A0A2K3DY26_CHLRE	A0A2K3DIB3_CHLRE	A0A2K3E8H6_CHLRE	A0A2K3CS00_CHLRE	A0A2K3D9B2_CHLRE	A0A2K3DZ32_CHLRE	A0A2K3CVK5_CHLRE	A0A2K3DU69_CHLRE	A0A2K3E7B4_CHLRE	A0A2K3DSJ8_CHLRE	A0A2K3E0U6_CHLRE	A0A2K3D275_CHLRE
biological_process	GO:0050896	response to stimulus	23	34	0.676471	1	2.81149e-24	1	0	A0A2K3D0S4_CHLRE	A0A2K3D0U8_CHLRE	A0A2K3D7H5_CHLRE	A0A2K3DBN2_CHLRE	A0A2K3DHC0_CHLRE	A0A2K3D9S2_CHLRE	A0A2K3DD45_CHLRE	A0A2K3DRZ0_CHLRE	A0A2K3D7H2_CHLRE	A0A2K3DGL0_CHLRE	A0A2K3DEV4_CHLRE	A0A2K3DGJ3_CHLRE	A0A2K3DGL1_CHLRE	A0A2K3D9L6_CHLRE	A0A2K3DRV7_CHLRE	A0A2K3DGK9_CHLRE	A0A2K3D884_CHLRE	A0A2K3D0R9_CHLRE	A0A2K3DGM5_CHLRE	A0A2K3D0V2_CHLRE	A0A2K3DEV2_CHLRE	A0A2K3DIY3_CHLRE	A0A2K3DGL2_CHLRE
molecular_function	GO:0016787	hydrolase activity	21	126	0.166667	0.572387	0.459614	1	1	A8ICD8_CHLRE	A0A2K3D184_CHLRE	A0A2K3D8Q3_CHLRE	A0A2K3DXM3_CHLRE	A0A2K3D5D3_CHLRE	A0A2K3D408_CHLRE	A0A2K3D159_CHLRE	A0A2K3D7L0_CHLRE	A0A2K3CTJ3_CHLRE	A0A2K3DLF9_CHLRE	A0A2K3DXM4_CHLRE	A0A2K3D7K3_CHLRE	A0A2K3CS00_CHLRE	A0A2K3D7K0_CHLRE	A0A2K3DZT7_CHLRE	A0A2K3DB37_CHLRE	A0A2K3CN31_CHLRE	A0A2K3DXP6_CHLRE	A0A2K3DU69_CHLRE	A0A2K3E443_CHLRE	A0A2K3DU97_CHLRE
cellular_component	GO:0005783	endoplasmic reticulum	21	273	0.0769231	1.35692e-07	1	0	1	A0A2K3CXR9_CHLRE	A0A2K3D9Y7_CHLRE	A0A2K3DPY6_CHLRE	A0A2K3DPQ3_CHLRE	A0A2K3D8P1_CHLRE	A0A2K3CQU9_CHLRE	A0A2K3E7F7_CHLRE	A0A2K3E4G9_CHLRE	A0A2K3DB34_CHLRE	A0A2K3DVK1_CHLRE	A0A2K3CSC3_CHLRE	A0A2K3DHQ5_CHLRE	A0A2K3E7U8_CHLRE	A0A2K3D8I4_CHLRE	A0A2K3CQ49_CHLRE	A0A2K3D8Z4_CHLRE	A0A2K3D3T2_CHLRE	A0A2K3D0Q0_CHLRE	A0A2K3DHC4_CHLRE	A0A2K3DB42_CHLRE	A0A2K3D7C6_CHLRE
molecular_function	GO:0003682	chromatin binding	21	57	0.368421	0.999993	2.16076e-05	1	0.003	A0A2K3D1W7_CHLRE	A0A2K3E6P6_CHLRE	A0A2K3DFV4_CHLRE	A0A2K3CNX5_CHLRE	A0A2K3D0Z9_CHLRE	A0A2K3E3R6_CHLRE	A0A2K3DLN8_CHLRE	A0A2K3D3Q9_CHLRE	A0A2K3DYP3_CHLRE	A0A2K3DEK7_CHLRE	A0A2K3DFQ1_CHLRE	A0A2K3DEM7_CHLRE	A0A2K3E5Y3_CHLRE	A0A2K3DF94_CHLRE	A0A2K3E133_CHLRE	A0A2K3DFH1_CHLRE	A0A2K3CRF0_CHLRE	A0A2K3DLN6_CHLRE	A0A2K3D586_CHLRE	A0A2K3CV21_CHLRE	A0A2K3D744_CHLRE
cellular_component	GO:0005829	cytosol	20	346	0.0578035	3.20679e-10	1	0	1	Q8VZZ5_CHLRE	A8I980_CHLRE	A8J1X8_CHLRE	A0A2K3E6P0_CHLRE	A0A2K3DM03_CHLRE	A0A2K3CVJ4_CHLRE	A0A2K3DX44_CHLRE	A0A2K3E600_CHLRE	A0A2K3DYD0_CHLRE	A0A2K3CV78_CHLRE	A0A2K3DLX7_CHLRE	A0A2K3CS54_CHLRE	A0A2K3CSN0_CHLRE	A0A2K3DE16_CHLRE	A0A2K3CNN5_CHLRE	A0A2K3D2W4_CHLRE	A0A2K3E0S6_CHLRE	A0A2K3E892_CHLRE	A0A2K3D977_CHLRE	A0A2K3D8D0_CHLRE
cellular_component	GO:0005759	mitochondrial matrix	20	109	0.183486	0.513831	0.579767	1	1	A8J144_CHLRE	A0A2K3D9H6_CHLRE	A0A2K3DCZ3_CHLRE	A0A2K3E3Y6_CHLRE	A0A2K3CWS9_CHLRE	A0A2K3CWQ8_CHLRE	A0A2K3CWS1_CHLRE	A0A2K3CWP5_CHLRE	A0A2K3D2Z7_CHLRE	A0A2K3CXJ9_CHLRE	A0A2K3DJV1_CHLRE	A0A2K3E2R3_CHLRE	A0A2K3CWN3_CHLRE	A0A2K3DE22_CHLRE	A0A2K3CWN9_CHLRE	A0A2K3CZC2_CHLRE	A0A2K3CQV1_CHLRE	A0A2K3CV32_CHLRE	A8HXW3_CHLRE	A0A2K3D744_CHLRE
biological_process	GO:0018105	peptidyl-serine phosphorylation	20	98	0.204082	0.970863	0.0516371	1	1	A0A2K3E2P6_CHLRE	A0A2K3E5D4_CHLRE	A0A2K3E5B6_CHLRE	A0A2K3DE59_CHLRE	A0A2K3CRD4_CHLRE	A0A2K3DUT0_CHLRE	A0A2K3E3Q1_CHLRE	A0A2K3DAN5_CHLRE	A0A2K3E308_CHLRE	A0A2K3D8S5_CHLRE	A0A2K3D3V2_CHLRE	A0A2K3D0T3_CHLRE	A0A2K3CVU1_CHLRE	A0A2K3DWY3_CHLRE	A0A2K3DPE2_CHLRE	A0A2K3D913_CHLRE	A0A2K3E6P9_CHLRE	A0A2K3DI28_CHLRE	A0A2K3CXG1_CHLRE	A0A2K3DFR2_CHLRE
biological_process	GO:0000724	double-strand break repair via homologous recombination	20	62	0.322581	1	1.89259e-08	1	0	A0A2K3E3G9_CHLRE	A0A2K3DUT4_CHLRE	A0A2K3D140_CHLRE	A0A2K3CWU4_CHLRE	A0A2K3DU39_CHLRE	A0A2K3CYW3_CHLRE	A0A2K3DUX9_CHLRE	A0A2K3DUR0_CHLRE	A0A2K3D4E3_CHLRE	A0A2K3CQT5_CHLRE	A0A2K3D618_CHLRE	A0A2K3D993_CHLRE	A0A2K3DRK4_CHLRE	A0A2K3DAG5_CHLRE	A0A2K3DU69_CHLRE	A0A2K3CZF6_CHLRE	A0A2K3DDR6_CHLRE	A0A2K3DAG6_CHLRE	A0A2K3D702_CHLRE	A0A2K3D275_CHLRE
biological_process	GO:0046999	regulation of conjugation	20	28	0.714286	1	7.53817e-12	1	0	A0A2K3D0S4_CHLRE	A0A2K3D7H5_CHLRE	A0A2K3DBN2_CHLRE	A0A2K3DHC0_CHLRE	A0A2K3D9S2_CHLRE	A0A2K3DD45_CHLRE	A0A2K3DRZ0_CHLRE	A0A2K3E4W9_CHLRE	A0A2K3DGL0_CHLRE	A0A2K3DGJ3_CHLRE	A0A2K3D9L6_CHLRE	A0A2K3DGK9_CHLRE	A0A2K3D884_CHLRE	A0A2K3D0R9_CHLRE	A0A2K3DGJ1_CHLRE	A0A2K3DGM5_CHLRE	A0A2K3D0V2_CHLRE	A0A2K3DEV2_CHLRE	A0A2K3DIY3_CHLRE	A0A2K3DGL2_CHLRE
molecular_function	GO:0004252	serine-type endopeptidase activity	19	91	0.208791	0.974516	0.0465057	1	1	CLPP_CHLRE	A0A2K3DJR2_CHLRE	A0A2K3DX05_CHLRE	A0A2K3CRQ3_CHLRE	A0A2K3E7H5_CHLRE	A0A2K3D6D8_CHLRE	A0A2K3E7J5_CHLRE	A0A2K3DSF8_CHLRE	A0A2K3DVD5_CHLRE	A0A2K3DN45_CHLRE	A0A2K3E7P9_CHLRE	A0A2K3CYH5_CHLRE	A0A2K3CVF8_CHLRE	A0A2K3DSH4_CHLRE	A0A2K3CPT9_CHLRE	A0A2K3CUS3_CHLRE	A8INX1_CHLRE	A8IJ60_CHLRE	A0A2K3CYQ2_CHLRE
molecular_function	GO:0003729	mRNA binding	19	125	0.152	0.833158	0.233785	1	1	A8I9W8_CHLRE	A8J3F8_CHLRE	A0A2K3DHX0_CHLRE	A0A2K3CWY3_CHLRE	A0A2K3DEK5_CHLRE	A0A2K3D2S9_CHLRE	A0A2K3E683_CHLRE	A0A2K3E6E3_CHLRE	A0A2K3E457_CHLRE	A0A2K3E3U2_CHLRE	A0A2K3D4R1_CHLRE	A0A2K3DWB2_CHLRE	A0A2K3CQK5_CHLRE	A0A2K3DEE7_CHLRE	A0A2K3D962_CHLRE	A0A2K3DQM1_CHLRE	A0A2K3CYN8_CHLRE	A0A2K3CPC9_CHLRE	A0A2K3D5Y2_CHLRE
cellular_component	GO:0005887	integral component of plasma membrane	19	97	0.195876	0.992772	0.0139052	1	0.891	Q8LP68_CHLRE	Q94CJ2_CHLRE	A0A2K3CZT1_CHLRE	A0A2K3D8G4_CHLRE	A0A2K3DGB6_CHLRE	A0A2K3CR54_CHLRE	A0A2K3DLV1_CHLRE	A0A2K3DTF1_CHLRE	A0A2K3CQF7_CHLRE	A0A2K3D9A7_CHLRE	A0A2K3DKM4_CHLRE	A0A2K3DJT8_CHLRE	A0A2K3E4W0_CHLRE	A0A2K3DP89_CHLRE	A0A2K3D1V4_CHLRE	A0A2K3CVV6_CHLRE	A0A2K3DSB6_CHLRE	A0A2K3CZ59_CHLRE	A0A2K3CP03_CHLRE
molecular_function	GO:0043565	sequence-specific DNA binding	19	41	0.463415	1	2.76501e-08	1	0	A0A2K3DGV5_CHLRE	A0A2K3DGU5_CHLRE	A0A2K3DGS3_CHLRE	A0A2K3DGT4_CHLRE	A0A2K3D851_CHLRE	A0A2K3DGT5_CHLRE	A0A2K3DWD9_CHLRE	A0A2K3DGR0_CHLRE	A0A2K3D7C0_CHLRE	A0A2K3DGS1_CHLRE	A0A2K3E6H8_CHLRE	A0A2K3DGU9_CHLRE	A0A2K3DGS5_CHLRE	A0A2K3D5C6_CHLRE	A0A2K3DEF3_CHLRE	A0A2K3DEE7_CHLRE	A0A2K3DAG2_CHLRE	A0A2K3DEE9_CHLRE	A0A2K3DGS0_CHLRE
biological_process	GO:0006281	DNA repair	19	72	0.263889	1	8.44722e-10	1	0	A0A2K3CYK0_CHLRE	A0A2K3D4L9_CHLRE	A0A2K3D646_CHLRE	A0A2K3DY33_CHLRE	A0A2K3D249_CHLRE	A0A2K3DYP3_CHLRE	A0A2K3DTE2_CHLRE	A0A2K3D1T7_CHLRE	A0A2K3DUS4_CHLRE	A0A2K3DIM2_CHLRE	A0A2K3D701_CHLRE	A0A2K3DSU7_CHLRE	A0A2K3DU69_CHLRE	A0A2K3DP21_CHLRE	A0A2K3D131_CHLRE	A0A2K3E138_CHLRE	A0A2K3DLI8_CHLRE	A0A2K3D450_CHLRE	A0A2K3D275_CHLRE
biological_process	GO:0006310	DNA recombination	19	105	0.180952	1	9.73471e-07	1	0	A8ICD8_CHLRE	A0A2K3D646_CHLRE	A0A2K3DR39_CHLRE	A0A2K3E495_CHLRE	A0A2K3CXE8_CHLRE	A0A2K3D249_CHLRE	A0A2K3E519_CHLRE	A0A2K3CNA2_CHLRE	A0A2K3D2C0_CHLRE	A0A2K3DKW4_CHLRE	A0A2K3D6N4_CHLRE	A0A2K3CYL0_CHLRE	A0A2K3E485_CHLRE	A0A2K3DU69_CHLRE	A0A2K3DP21_CHLRE	A0A2K3E472_CHLRE	A0A2K3DLI8_CHLRE	A0A2K3E502_CHLRE	A0A2K3D275_CHLRE
cellular_component	GO:0005874	microtubule	18	90	0.2	0.98811	0.021572	1	0.993	A0A2K3D5V4_CHLRE	A0A2K3CY97_CHLRE	A0A2K3CUR8_CHLRE	A0A2K3DN16_CHLRE	A0A2K3DWY1_CHLRE	A0A2K3DFZ5_CHLRE	A0A2K3DSZ2_CHLRE	A0A2K3D1N8_CHLRE	A0A2K3DV97_CHLRE	A0A2K3DJH8_CHLRE	A0A2K3DVC5_CHLRE	A0A2K3DWL0_CHLRE	A0A2K3CNE1_CHLRE	A0A2K3CRT3_CHLRE	A0A2K3DZP9_CHLRE	A0A2K3DQQ4_CHLRE	A0A2K3DZD8_CHLRE	A0A2K3DC11_CHLRE
biological_process	GO:0010468	regulation of gene expression	18	44	0.409091	1	4.43559e-11	1	0	A8I9W8_CHLRE	A8J3F8_CHLRE	A0A2K3DHX0_CHLRE	A0A2K3CNX5_CHLRE	A0A2K3DKX2_CHLRE	A0A2K3E3R6_CHLRE	A0A2K3CP42_CHLRE	A0A2K3DLN8_CHLRE	A0A2K3D3Q9_CHLRE	A0A2K3DEK7_CHLRE	A0A2K3E3U2_CHLRE	A0A2K3E3J8_CHLRE	A0A2K3DT58_CHLRE	A0A2K3DEM7_CHLRE	A0A2K3DF94_CHLRE	A0A2K3DLN6_CHLRE	A0A2K3CV21_CHLRE	A0A2K3CPC9_CHLRE
cellular_component	GO:0035770	ribonucleoprotein granule	18	72	0.25	0.995041	0.00986863	1	0.849	A8J144_CHLRE	A0A2K3D9H6_CHLRE	A0A2K3DCZ3_CHLRE	A0A2K3CWS9_CHLRE	A0A2K3CWQ8_CHLRE	A0A2K3CWS1_CHLRE	A0A2K3CWP5_CHLRE	A0A2K3D2Z7_CHLRE	A0A2K3CXJ9_CHLRE	A0A2K3DJV1_CHLRE	A0A2K3E2R3_CHLRE	A0A2K3CWN3_CHLRE	A0A2K3DE22_CHLRE	A0A2K3CWN9_CHLRE	A0A2K3CZC2_CHLRE	A0A2K3CQV1_CHLRE	A0A2K3CV32_CHLRE	A8HXW3_CHLRE
biological_process	GO:1901259	chloroplast rRNA processing	18	72	0.25	0.995995	0.00914283	1	0.975	A8J144_CHLRE	A0A2K3D9H6_CHLRE	A0A2K3DCZ3_CHLRE	A0A2K3CWS9_CHLRE	A0A2K3CWQ8_CHLRE	A0A2K3CWS1_CHLRE	A0A2K3CWP5_CHLRE	A0A2K3D2Z7_CHLRE	A0A2K3CXJ9_CHLRE	A0A2K3DJV1_CHLRE	A0A2K3E2R3_CHLRE	A0A2K3CWN3_CHLRE	A0A2K3DE22_CHLRE	A0A2K3CWN9_CHLRE	A0A2K3CZC2_CHLRE	A0A2K3CQV1_CHLRE	A0A2K3CV32_CHLRE	A8HXW3_CHLRE
biological_process	GO:0000963	mitochondrial RNA processing	18	72	0.25	0.996692	0.00752097	1	0.957	A8J144_CHLRE	A0A2K3D9H6_CHLRE	A0A2K3DCZ3_CHLRE	A0A2K3CWS9_CHLRE	A0A2K3CWQ8_CHLRE	A0A2K3CWS1_CHLRE	A0A2K3CWP5_CHLRE	A0A2K3D2Z7_CHLRE	A0A2K3CXJ9_CHLRE	A0A2K3DJV1_CHLRE	A0A2K3E2R3_CHLRE	A0A2K3CWN3_CHLRE	A0A2K3DE22_CHLRE	A0A2K3CWN9_CHLRE	A0A2K3CZC2_CHLRE	A0A2K3CQV1_CHLRE	A0A2K3CV32_CHLRE	A8HXW3_CHLRE
biological_process	GO:0044528	regulation of mitochondrial mRNA stability	18	72	0.25	0.995995	0.00914283	1	0.975	A8J144_CHLRE	A0A2K3D9H6_CHLRE	A0A2K3DCZ3_CHLRE	A0A2K3CWS9_CHLRE	A0A2K3CWQ8_CHLRE	A0A2K3CWS1_CHLRE	A0A2K3CWP5_CHLRE	A0A2K3D2Z7_CHLRE	A0A2K3CXJ9_CHLRE	A0A2K3DJV1_CHLRE	A0A2K3E2R3_CHLRE	A0A2K3CWN3_CHLRE	A0A2K3DE22_CHLRE	A0A2K3CWN9_CHLRE	A0A2K3CZC2_CHLRE	A0A2K3CQV1_CHLRE	A0A2K3CV32_CHLRE	A8HXW3_CHLRE
biological_process	GO:0005975	carbohydrate metabolic process	17	87	0.195402	0.475553	0.596253	1	1	A0A2K3DBP8_CHLRE	A0A2K3DNA7_CHLRE	A0A2K3CTW1_CHLRE	A0A2K3DB77_CHLRE	A0A2K3E4S5_CHLRE	A0A2K3D2V6_CHLRE	A0A2K3DGK5_CHLRE	A0A2K3CTW5_CHLRE	A0A2K3DRZ4_CHLRE	A0A2K3DSA5_CHLRE	A0A2K3DS95_CHLRE	A0A2K3DX81_CHLRE	A0A2K3DBQ5_CHLRE	A0A2K3DYA8_CHLRE	A0A2K3DB83_CHLRE	A0A2K3DBP7_CHLRE	A0A2K3D977_CHLRE
biological_process	GO:0016579	protein deubiquitination	16	55	0.290909	0.998864	0.00279679	1	0.782	A0A2K3E3G9_CHLRE	A0A2K3CX46_CHLRE	A0A2K3D140_CHLRE	A0A2K3CWU4_CHLRE	A0A2K3DU39_CHLRE	A0A2K3CYW3_CHLRE	A0A2K3DUX9_CHLRE	A0A2K3E6P0_CHLRE	A0A2K3DMX5_CHLRE	A0A2K3DUR0_CHLRE	A0A2K3DYD0_CHLRE	A0A2K3CQT5_CHLRE	A0A2K3D618_CHLRE	A0A2K3D993_CHLRE	A0A2K3DRK4_CHLRE	A8I9X2_CHLRE
molecular_function	GO:0005216	ion channel activity	16	40	0.4	0.999794	0.000435063	1	0.142	A0A2K3D768_CHLRE	A0A2K3DA34_CHLRE	A0A2K3DGB6_CHLRE	A0A2K3CR54_CHLRE	A0A2K3D755_CHLRE	A0A2K3CXC9_CHLRE	A0A2K3D9A7_CHLRE	A0A2K3DKM4_CHLRE	A0A2K3E5M0_CHLRE	A0A2K3DJT8_CHLRE	A0A2K3DP89_CHLRE	A0A2K3D1V4_CHLRE	A0A2K3E5M5_CHLRE	A0A2K3CR50_CHLRE	A0A2K3DSB6_CHLRE	A0A2K3CP03_CHLRE
molecular_function	GO:0004712	protein serine/threonine/tyrosine kinase activity	15	72	0.208333	0.956383	0.0799042	1	1	A0A2K3DYA1_CHLRE	A0A2K3D170_CHLRE	A0A2K3CZ56_CHLRE	A0A2K3CRD4_CHLRE	A0A2K3D2P4_CHLRE	A0A2K3E3Q1_CHLRE	A0A2K3E308_CHLRE	A0A2K3CVU1_CHLRE	A0A2K3DWY3_CHLRE	A0A2K3CZ50_CHLRE	A0A2K3DPE2_CHLRE	A0A2K3DEX3_CHLRE	A0A2K3CVM2_CHLRE	A0A2K3DCC3_CHLRE	A0A2K3DEY2_CHLRE
cellular_component	GO:0005739	mitochondrion	15	249	0.060241	0.000920937	0.999435	0.052	1	A0A2K3DYD5_CHLRE	A0A2K3DXT5_CHLRE	A0A2K3CSV9_CHLRE	A0A2K3CVZ2_CHLRE	A0A2K3DLA1_CHLRE	A0A2K3DPZ8_CHLRE	A0A2K3DDD4_CHLRE	A0A2K3D0M3_CHLRE	A0A2K3E673_CHLRE	A0A2K3CS54_CHLRE	A0A2K3DDN7_CHLRE	A0A2K3DGD3_CHLRE	A0A2K3D5I7_CHLRE	A0A2K3D425_CHLRE	A8HYW3_CHLRE
molecular_function	GO:0005516	calmodulin binding	15	71	0.211268	0.965379	0.0654656	1	1	A8J098_CHLRE	A0A2K3E2P6_CHLRE	A0A2K3E5B6_CHLRE	A0A2K3CTD1_CHLRE	A0A2K3DGS1_CHLRE	A0A2K3CRD4_CHLRE	A0A2K3DUT0_CHLRE	A0A2K3DVC5_CHLRE	A0A2K3E308_CHLRE	A0A2K3CVU1_CHLRE	A0A2K3DWY3_CHLRE	A0A2K3DPE2_CHLRE	A0A2K3DAG2_CHLRE	A0A2K3D913_CHLRE	A0A2K3DG07_CHLRE
molecular_function	GO:0003777	microtubule motor activity	15	43	0.348837	0.999999	3.54265e-06	1	0	Q7X931_CHLRE	A0A2K3DJB1_CHLRE	A0A2K3DWY1_CHLRE	A0A2K3DFZ5_CHLRE	A0A2K3CZG7_CHLRE	A0A2K3DJH8_CHLRE	A0A2K3DWL0_CHLRE	A0A2K3CNE1_CHLRE	A0A2K3DWK7_CHLRE	A0A2K3CRT3_CHLRE	A0A2K3DZA7_CHLRE	A0A2K3DZP9_CHLRE	A0A2K3DZD8_CHLRE	A0A2K3D915_CHLRE	A0A2K3DC11_CHLRE
molecular_function	GO:0016491	oxidoreductase activity	14	212	0.0660377	8.82818e-12	1	0	1	A0A2K3DUX3_CHLRE	A0A2K3DF08_CHLRE	A0A2K3DWH7_CHLRE	A0A2K3DCJ8_CHLRE	A0A2K3D5Q1_CHLRE	A0A2K3DPS9_CHLRE	A0A2K3DB37_CHLRE	A0A2K3DB48_CHLRE	A0A2K3DUW8_CHLRE	A0A2K3CQL5_CHLRE	A0A2K3D0U1_CHLRE	Q6V9B3_CHLRE	A0A2K3CQ67_CHLRE	A0A2K3DDL8_CHLRE
molecular_function	GO:0000981	DNA-binding transcription factor activity, RNA polymerase II-specific	14	54	0.259259	0.999831	0.000494091	1	0.157	A0A098_CHLRE	A0A2K3E2T6_CHLRE	A0A2K3DDI1_CHLRE	A0A2K3DTF3_CHLRE	A0A2K3D7C3_CHLRE	A0A2K3D1V9_CHLRE	A0A2K3DPP5_CHLRE	A0A2K3E3P9_CHLRE	A0A2K3D1C2_CHLRE	A0A2K3E4Z7_CHLRE	A0A2K3DV55_CHLRE	A0A2K3CX47_CHLRE	A0A2K3DER0_CHLRE	A0A2K3DYQ3_CHLRE
molecular_function	GO:0000978	RNA polymerase II cis-regulatory region sequence-specific DNA binding	14	52	0.269231	0.995898	0.0105036	1	0.978	A0A098_CHLRE	A0A2K3E2T6_CHLRE	A0A2K3DDI1_CHLRE	A0A2K3DTF3_CHLRE	A0A2K3D7C3_CHLRE	A0A2K3D1V9_CHLRE	A0A2K3D2K4_CHLRE	A0A2K3DPP5_CHLRE	A0A2K3E3P9_CHLRE	A0A2K3D1C2_CHLRE	A0A2K3DV55_CHLRE	A0A2K3CX47_CHLRE	A0A2K3DER0_CHLRE	A0A2K3DYQ3_CHLRE
molecular_function	GO:0106310	protein serine kinase activity	13	66	0.19697	0.928586	0.12677	1	1	A0A2K3D170_CHLRE	A0A2K3CZ56_CHLRE	A0A2K3CRD4_CHLRE	A0A2K3E3Q1_CHLRE	A0A2K3E308_CHLRE	A0A2K3CVU1_CHLRE	A0A2K3DWY3_CHLRE	A0A2K3CZ50_CHLRE	A0A2K3DPE2_CHLRE	A0A2K3DEX3_CHLRE	A0A2K3CVM2_CHLRE	A0A2K3DCC3_CHLRE	A0A2K3DEY2_CHLRE
biological_process	GO:0046777	protein autophosphorylation	13	64	0.203125	0.942455	0.105749	1	1	A0A2K3E2P6_CHLRE	A0A2K3E5B6_CHLRE	A0A2K3CZT1_CHLRE	A0A2K3D8G4_CHLRE	A0A2K3CR54_CHLRE	A0A2K3CRD4_CHLRE	A0A2K3DUT0_CHLRE	A0A2K3E308_CHLRE	A0A2K3CVU1_CHLRE	A0A2K3DWY3_CHLRE	A0A2K3DPE2_CHLRE	A0A2K3DJT8_CHLRE	A0A2K3D913_CHLRE
molecular_function	GO:0003824	catalytic activity	13	88	0.147727	0.00951258	0.992003	0.646	1	A0A2K3DPE0_CHLRE	A0A2K3DEZ0_CHLRE	A0A2K3DRE5_CHLRE	A0A2K3CTW1_CHLRE	A0A2K3CTM0_CHLRE	A0A2K3DRG0_CHLRE	A0A2K3DV97_CHLRE	A0A2K3CTW5_CHLRE	A0A2K3E1I7_CHLRE	A0A2K3DPC5_CHLRE	A0A2K3DEX0_CHLRE	A0A2K3DMJ5_CHLRE	A0A2K3D3B8_CHLRE
molecular_function	GO:0003724	RNA helicase activity	13	61	0.213115	0.954519	0.0865752	1	1	A0A2K3DAX3_CHLRE	A0A2K3D5D3_CHLRE	A0A2K3D408_CHLRE	A0A2K3CSM4_CHLRE	A0A2K3D159_CHLRE	A0A2K3DG81_CHLRE	A0A2K3DLF9_CHLRE	A0A2K3DXU4_CHLRE	A0A2K3E844_CHLRE	A0A2K3DIB3_CHLRE	A0A2K3CS00_CHLRE	A0A2K3E1C7_CHLRE	A0A2K3CN31_CHLRE
molecular_function	GO:0043130	ubiquitin binding	12	49	0.244898	0.984804	0.0350764	1	1	A0A2K3E3G9_CHLRE	A0A2K3D140_CHLRE	A0A2K3CWU4_CHLRE	A0A2K3DU39_CHLRE	A0A2K3CYW3_CHLRE	A0A2K3DUX9_CHLRE	A0A2K3DUR0_CHLRE	A0A2K3DZ28_CHLRE	A0A2K3CQT5_CHLRE	A0A2K3D618_CHLRE	A0A2K3D993_CHLRE	A0A2K3DRK4_CHLRE
molecular_function	GO:0003697	single-stranded DNA binding	12	43	0.27907	0.991209	0.0219607	1	1	A0A0U2Q5E3_CHLRE	A0A2K3D3N5_CHLRE	A0A2K3DUT4_CHLRE	A0A2K3E6D5_CHLRE	A0A2K3E231_CHLRE	A0A2K3DQR5_CHLRE	A0A2K3DIP5_CHLRE	A0A2K3DRA1_CHLRE	A0A2K3CTV1_CHLRE	A0A2K3D4E3_CHLRE	A0A2K3E874_CHLRE	A0A2K3D702_CHLRE
molecular_function	GO:0004767	sphingomyelin phosphodiesterase activity	12	176	0.0681818	0.00196131	0.999188	0.185	1	A0A2K3CXR9_CHLRE	A0A2K3D8Q1_CHLRE	A0A2K3D8P1_CHLRE	A0A2K3D9Q1_CHLRE	A0A2K3E4G9_CHLRE	A0A2K3D8N4_CHLRE	A0A2K3DB34_CHLRE	A0A2K3CSC3_CHLRE	A0A2K3DHQ5_CHLRE	A0A2K3DHC4_CHLRE	A0A2K3DB42_CHLRE	A0A2K3D7C6_CHLRE
biological_process	GO:0006629	lipid metabolic process	11	95	0.115789	7.44621e-07	1	0	1	A0A2K3E500_CHLRE	A0A2K3E3Y4_CHLRE	A0A2K3CRD1_CHLRE	A0A2K3DS10_CHLRE	A0A2K3E3A5_CHLRE	A0A2K3D3D3_CHLRE	A0A2K3E3Z8_CHLRE	A0A2K3CP03_CHLRE	A0A2K3DU43_CHLRE	Q6VPQ2_CHLRE	A0A2K3CXN1_CHLRE
biological_process	GO:0080142	regulation of salicylic acid biosynthetic process	11	13	0.846154	1	2.37044e-08	1	0	A0A2K3DGV5_CHLRE	A0A2K3DGU5_CHLRE	A0A2K3DGS3_CHLRE	A0A2K3DGT4_CHLRE	A0A2K3DGT5_CHLRE	A0A2K3DGR0_CHLRE	A0A2K3DGS1_CHLRE	A0A2K3DGU9_CHLRE	A0A2K3DGS5_CHLRE	A0A2K3DAG2_CHLRE	A0A2K3DGS0_CHLRE
molecular_function	GO:0003712	transcription coregulator activity	11	40	0.275	0.926899	0.124419	1	1	A0A2K3CUE4_CHLRE	A0A2K3D666_CHLRE	A0A2K3E5F1_CHLRE	A0A2K3CRK4_CHLRE	A0A2K3D6P5_CHLRE	A0A2K3DN88_CHLRE	A0A2K3DEN5_CHLRE	A0A2K3D274_CHLRE	A0A2K3DAW9_CHLRE	A0A2K3E138_CHLRE	A0A2K3DNI2_CHLRE
biological_process	GO:0006886	intracellular protein transport	11	102	0.107843	0.0510969	0.966296	1	1	A8I205_CHLRE	A0A2K3D9Y7_CHLRE	A0A2K3CZA0_CHLRE	A0A2K3CQU9_CHLRE	A0A2K3DYN3_CHLRE	A0A2K3D2X0_CHLRE	A0A2K3E7U8_CHLRE	A0A2K3D2W4_CHLRE	A0A2K3CQ49_CHLRE	A8HXA2_CHLRE	A8J5T5_CHLRE
biological_process	GO:1990414	replication-born double-strand break repair via sister chromatid exchange	11	19	0.578947	0.999999	1.01754e-05	1	0.004	A0A2K3DFV4_CHLRE	A0A2K3CNX5_CHLRE	A0A2K3E3R6_CHLRE	A0A2K3DLN8_CHLRE	A0A2K3D3Q9_CHLRE	A0A2K3DEK7_CHLRE	A0A2K3DFQ1_CHLRE	A0A2K3DEM7_CHLRE	A0A2K3DF94_CHLRE	A0A2K3DLN6_CHLRE	A0A2K3CV21_CHLRE
biological_process	GO:0006468	protein phosphorylation	10	59	0.169492	0.968047	0.0486178	1	1	A0A2K3DS51_CHLRE	A0A2K3DWM0_CHLRE	A0A2K3D1M9_CHLRE	A0A2K3DR74_CHLRE	A0A2K3E6S6_CHLRE	A0A2K3CWN0_CHLRE	A0A2K3E5P4_CHLRE	A0A2K3DRT5_CHLRE	A0A2K3DJ59_CHLRE	A0A0M4M5H7_CHLRE
biological_process	GO:0060271	cilium assembly	10	52	0.192308	0.932594	0.110934	1	1	CCD61_CHLRE	A9XPA7_CHLRE	A0A2K3CZX8_CHLRE	A0A2K3DNN4_CHLRE	A0A2K3D7G4_CHLRE	A0A2K3CP67_CHLRE	A0A2K3DH40_CHLRE	A0A2K3E7K9_CHLRE	A0A2K3E6G2_CHLRE	A8IWR1_CHLRE
biological_process	GO:0015074	DNA integration	10	38	0.263158	0.987208	0.0330293	1	1	A0A2K3DSQ6_CHLRE	A0A2K3E495_CHLRE	A0A2K3E7S1_CHLRE	A0A2K3CNA2_CHLRE	A0A2K3DY47_CHLRE	A0A2K3DXX4_CHLRE	A0A2K3DY26_CHLRE	A0A2K3E485_CHLRE	A0A2K3CVK5_CHLRE	A0A2K3E472_CHLRE
biological_process	GO:0046513	ceramide biosynthetic process	10	144	0.0694444	0.00480997	0.998026	0.532	1	A0A2K3CXR9_CHLRE	A0A2K3D8P1_CHLRE	A0A2K3DLV1_CHLRE	A0A2K3E4G9_CHLRE	A0A2K3DB34_CHLRE	A0A2K3CSC3_CHLRE	A0A2K3DHQ5_CHLRE	A0A2K3DHC4_CHLRE	A0A2K3DB42_CHLRE	A0A2K3D7C6_CHLRE
molecular_function	GO:0004620	phospholipase activity	10	136	0.0735294	0.00390436	0.998168	0.313	1	A0A2K3CXR9_CHLRE	A0A2K3D8P1_CHLRE	A0A2K3E4G9_CHLRE	A0A2K3DB34_CHLRE	A0A2K3CSC3_CHLRE	A0A2K3DHQ5_CHLRE	A0A2K3DHC4_CHLRE	A0A2K3DB42_CHLRE	A0A2K3DX20_CHLRE	A0A2K3D7C6_CHLRE
molecular_function	GO:0004114	3',5'-cyclic-nucleotide phosphodiesterase activity	10	38	0.263158	0.98722	0.0329755	1	1	A0A2K3E3K8_CHLRE	A0A2K3E2U1_CHLRE	A0A2K3D2M9_CHLRE	A0A2K3E402_CHLRE	A0A2K3DKM3_CHLRE	A0A2K3D7N5_CHLRE	A0A2K3E4B4_CHLRE	A0A2K3CXT4_CHLRE	A0A2K3E413_CHLRE	A0A2K3D5P8_CHLRE
cellular_component	GO:0005930	axoneme	9	46	0.195652	0.966438	0.0668265	1	1	A0A2K3CRT2_CHLRE	A0A2K3DDL5_CHLRE	A0A2K3CUD8_CHLRE	A0A2K3D1N8_CHLRE	A0A2K3DV97_CHLRE	A0A2K3CU18_CHLRE	A0A2K3E7K9_CHLRE	A0A2K3E6A9_CHLRE	A0A2K3D8Z6_CHLRE
biological_process	GO:0006508	proteolysis	9	46	0.195652	0.308267	0.739508	1	1	A0A2K3DB77_CHLRE	A0A2K3DSA5_CHLRE	A0A2K3CZT0_CHLRE	A0A2K3E673_CHLRE	A0A2K3DS95_CHLRE	A0A2K3CYD2_CHLRE	A0A2K3DB83_CHLRE	A0A2K3CZE2_CHLRE	A8IL08_CHLRE
molecular_function	GO:0008061	chitin binding	9	16	0.5625	0.99999	9.26435e-05	1	0.027	A0A2K3DBP8_CHLRE	A0A2K3DB77_CHLRE	A0A2K3E4S5_CHLRE	A0A2K3DRZ4_CHLRE	A0A2K3DSA5_CHLRE	A0A2K3DS95_CHLRE	A0A2K3DBQ5_CHLRE	A0A2K3DB83_CHLRE	A0A2K3DBP7_CHLRE
cellular_component	GO:0005615	extracellular space	9	61	0.147541	0.658087	0.482773	1	1	A0A2K3D7M6_CHLRE	A0A2K3DCL8_CHLRE	A0A2K3DI22_CHLRE	A0A2K3CYQ1_CHLRE	A0A2K3D5K2_CHLRE	A0A2K3E5G0_CHLRE	A0A2K3E7Z7_CHLRE	A0A2K3E7R1_CHLRE	A0A2K3CNP0_CHLRE
cellular_component	GO:0005743	mitochondrial inner membrane	9	71	0.126761	0.106275	0.934185	1	1	A8IVB2_CHLRE	A0A2K3CQU1_CHLRE	A0A2K3DG93_CHLRE	A0A2K3E0L0_CHLRE	A0A2K3CUM3_CHLRE	A0A2K3DVN1_CHLRE	A0A2K3D1B2_CHLRE	A0A2K3CTI6_CHLRE	A0A2K3DGD6_CHLRE
cellular_component	GO:0005730	nucleolus	9	124	0.0725806	0.00171532	0.999345	0.099	1	A8J0V5_CHLRE	A0A2K3D5D3_CHLRE	A0A2K3D0T5_CHLRE	A0A2K3CNG0_CHLRE	A0A2K3D080_CHLRE	A0A2K3DLF9_CHLRE	A0A2K3CZX9_CHLRE	A0A2K3CPH6_CHLRE	A8IWK7_CHLRE
molecular_function	GO:0009931	calcium-dependent protein serine/threonine kinase activity	9	53	0.169811	0.797817	0.323213	1	1	A0A2K3E2P6_CHLRE	A0A2K3E5B6_CHLRE	A0A2K3CRD4_CHLRE	A0A2K3DUT0_CHLRE	A0A2K3E308_CHLRE	A0A2K3CVU1_CHLRE	A0A2K3DWY3_CHLRE	A0A2K3DPE2_CHLRE	A0A2K3D913_CHLRE
molecular_function	GO:0004683	calmodulin-dependent protein kinase activity	9	56	0.160714	0.74534	0.386167	1	1	A0A2K3E2P6_CHLRE	A0A2K3E5B6_CHLRE	A0A2K3CRD4_CHLRE	A0A2K3DUT0_CHLRE	A0A2K3E308_CHLRE	A0A2K3CVU1_CHLRE	A0A2K3DWY3_CHLRE	A0A2K3DPE2_CHLRE	A0A2K3D913_CHLRE
cellular_component	GO:0071944	cell periphery	9	131	0.0687023	0.999939	9.7753e-05	1	0.017	A0A2K3CXR9_CHLRE	A0A2K3D8P1_CHLRE	A0A2K3E4G9_CHLRE	A0A2K3DB34_CHLRE	A0A2K3CSC3_CHLRE	A0A2K3DHQ5_CHLRE	A0A2K3DHC4_CHLRE	A0A2K3DB42_CHLRE	A0A2K3D7C6_CHLRE
biological_process	GO:0030149	sphingolipid catabolic process	9	132	0.0681818	0.00541397	0.997849	0.568	1	A0A2K3CXR9_CHLRE	A0A2K3D8P1_CHLRE	A0A2K3E4G9_CHLRE	A0A2K3DB34_CHLRE	A0A2K3CSC3_CHLRE	A0A2K3DHQ5_CHLRE	A0A2K3DHC4_CHLRE	A0A2K3DB42_CHLRE	A0A2K3D7C6_CHLRE
cellular_component	GO:0005871	kinesin complex	9	35	0.257143	0.978022	0.0543348	1	1	A0A2K3DWY1_CHLRE	A0A2K3DFZ5_CHLRE	A0A2K3DJH8_CHLRE	A0A2K3DWL0_CHLRE	A0A2K3CNE1_CHLRE	A0A2K3CRT3_CHLRE	A0A2K3DZP9_CHLRE	A0A2K3DZD8_CHLRE	A0A2K3DC11_CHLRE
cellular_component	GO:0090694	Scc2-Scc4 cohesin loading complex	9	15	0.6	0.999996	4.3715e-05	1	0.006	A0A2K3CNX5_CHLRE	A0A2K3E3R6_CHLRE	A0A2K3DLN8_CHLRE	A0A2K3D3Q9_CHLRE	A0A2K3DEK7_CHLRE	A0A2K3DEM7_CHLRE	A0A2K3DF94_CHLRE	A0A2K3DLN6_CHLRE	A0A2K3CV21_CHLRE
biological_process	GO:0034087	establishment of mitotic sister chromatid cohesion	9	15	0.6	0.99999	9.26374e-05	1	0.047	A0A2K3CNX5_CHLRE	A0A2K3E3R6_CHLRE	A0A2K3DLN8_CHLRE	A0A2K3D3Q9_CHLRE	A0A2K3DEK7_CHLRE	A0A2K3DEM7_CHLRE	A0A2K3DF94_CHLRE	A0A2K3DLN6_CHLRE	A0A2K3CV21_CHLRE
biological_process	GO:0071169	establishment of protein localization to chromatin	9	15	0.6	0.999996	4.62819e-05	1	0.025	A0A2K3CNX5_CHLRE	A0A2K3E3R6_CHLRE	A0A2K3DLN8_CHLRE	A0A2K3D3Q9_CHLRE	A0A2K3DEK7_CHLRE	A0A2K3DEM7_CHLRE	A0A2K3DF94_CHLRE	A0A2K3DLN6_CHLRE	A0A2K3CV21_CHLRE
biological_process	GO:0061780	mitotic cohesin loading	9	15	0.6	0.999996	4.62819e-05	1	0.025	A0A2K3CNX5_CHLRE	A0A2K3E3R6_CHLRE	A0A2K3DLN8_CHLRE	A0A2K3D3Q9_CHLRE	A0A2K3DEK7_CHLRE	A0A2K3DEM7_CHLRE	A0A2K3DF94_CHLRE	A0A2K3DLN6_CHLRE	A0A2K3CV21_CHLRE
molecular_function	GO:0005525	GTP binding	8	158	0.0506329	0.000221027	0.999933	0.019	1	A0A2K3CZA3_CHLRE	A0A2K3E0D8_CHLRE	A0A2K3DA81_CHLRE	A0A2K3DSZ2_CHLRE	A0A2K3DHR8_CHLRE	A0A2K3CU48_CHLRE	A0A2K3DLG8_CHLRE	A0A2K3CTD6_CHLRE
molecular_function	GO:0004843	thiol-dependent deubiquitinase	8	52	0.153846	0.697339	0.449153	1	1	A0A2K3CSY6_CHLRE	A0A2K3CX46_CHLRE	A0A2K3E6P0_CHLRE	A0A2K3DMX5_CHLRE	A0A2K3DZ28_CHLRE	A0A2K3DYD0_CHLRE	A0A2K3DR81_CHLRE	A0A2K3D485_CHLRE
molecular_function	GO:0008168	methyltransferase activity	8	73	0.109589	0.0139441	0.992035	0.783	1	A0A2K3D1P5_CHLRE	A0A2K3D4P7_CHLRE	A0A2K3DBH6_CHLRE	A0A2K3DZG0_CHLRE	A0A2K3D8E4_CHLRE	A0A2K3CSN9_CHLRE	A0A2K3CSQ1_CHLRE	A0A2K3DZD7_CHLRE
molecular_function	GO:0004197	cysteine-type endopeptidase activity	8	31	0.258065	0.967025	0.0757821	1	1	A0A2K3DCL8_CHLRE	A0A2K3E6P0_CHLRE	A0A2K3E6M0_CHLRE	A0A2K3DI22_CHLRE	A0A2K3DYD0_CHLRE	A0A2K3CYQ1_CHLRE	A0A2K3E5G0_CHLRE	A0A2K3CNP0_CHLRE
molecular_function	GO:0004222	metalloendopeptidase activity	8	45	0.177778	0.828464	0.292362	1	1	A0A2K3E613_CHLRE	A0A2K3CZT0_CHLRE	A0A2K3E673_CHLRE	A0A2K3CYD2_CHLRE	A0A2K3D637_CHLRE	A0A2K3CZS7_CHLRE	A8JD49_CHLRE	A8IL08_CHLRE
biological_process	GO:0051301	cell division	8	41	0.195122	0.967014	0.0642867	1	1	A0A2K3D9Y5_CHLRE	A0A2K3CVM7_CHLRE	A0A2K3D0Z9_CHLRE	A0A2K3DI01_CHLRE	A0A2K3DBV0_CHLRE	A0A2K3CVZ5_CHLRE	A0A2K3DH68_CHLRE	A0A2K3CZ15_CHLRE
biological_process	GO:0006623	protein targeting to vacuole	8	13	0.615385	0.999991	9.8347e-05	1	0.051	A0A2K3D1H8_CHLRE	A0A2K3CQQ3_CHLRE	A0A2K3DVX3_CHLRE	A0A2K3D1G5_CHLRE	A0A2K3DAJ8_CHLRE	A0A2K3CQS6_CHLRE	A0A2K3DQL6_CHLRE	A0A2K3D1L1_CHLRE
biological_process	GO:0006378	mRNA polyadenylation	8	29	0.275862	0.981474	0.0501316	1	1	A0A2K3CWY3_CHLRE	A0A2K3DWB2_CHLRE	A0A2K3DEE7_CHLRE	A0A2K3CUY3_CHLRE	A0A2K3DQM1_CHLRE	A0A2K3E241_CHLRE	A0A2K3CYN8_CHLRE	A0A2K3D5Y2_CHLRE
molecular_function	GO:0003678	DNA helicase activity	8	28	0.285714	0.999713	0.00091918	1	0.231	A0A2K3D3N5_CHLRE	A0A2K3E6D5_CHLRE	A0A2K3D646_CHLRE	A0A2K3DIP5_CHLRE	A0A2K3CTV1_CHLRE	A0A2K3DKS6_CHLRE	A0A2K3E158_CHLRE	A0A2K3D702_CHLRE
cellular_component	GO:0030286	dynein complex	8	20	0.4	0.999476	0.00191737	1	0.29	A0A2K3D5V4_CHLRE	A0A2K3CY97_CHLRE	A0A2K3CUR8_CHLRE	A0A2K3DN16_CHLRE	A0A2K3D1N8_CHLRE	A0A2K3DV97_CHLRE	A0A2K3E6A9_CHLRE	A0A2K3DQQ4_CHLRE
biological_process	GO:0055085	transmembrane transport	8	50	0.16	0.256806	0.797365	1	1	A0A2K3DJR7_CHLRE	A0A2K3CQU1_CHLRE	A0A2K3E635_CHLRE	A0A2K3CW12_CHLRE	A0A2K3CPJ7_CHLRE	A0A2K3D1B2_CHLRE	A0A2K3DCK0_CHLRE	A0A2K3D7D7_CHLRE
molecular_function	GO:0008569	minus-end-directed microtubule motor activity	8	17	0.470588	0.999828	0.00110031	1	0.27	A0A2K3D5V4_CHLRE	A0A2K3CY97_CHLRE	A0A2K3CUR8_CHLRE	A0A2K3DN16_CHLRE	A0A2K3D1N8_CHLRE	A0A2K3DV97_CHLRE	A0A2K3E6A9_CHLRE	A0A2K3DQQ4_CHLRE
biological_process	GO:0032196	transposition	8	49	0.163265	0.756215	0.382187	1	1	A0A2K3DR39_CHLRE	A0A2K3CXE8_CHLRE	A0A2K3E519_CHLRE	A0A2K3D2C0_CHLRE	A0A2K3DKW4_CHLRE	A0A2K3D6N4_CHLRE	A0A2K3CYL0_CHLRE	A0A2K3E502_CHLRE
molecular_function	GO:0000976	transcription cis-regulatory region binding	8	23	0.347826	0.99988	0.000316691	1	0.078	A0A2K3DZA8_CHLRE	A0A2K3DH12_CHLRE	A0A2K3D3A1_CHLRE	A0A2K3DLP6_CHLRE	A0A2K3DFM4_CHLRE	A0A2K3DE24_CHLRE	A0A2K3DF47_CHLRE	A0A2K3DK56_CHLRE
molecular_function	GO:0005506	iron ion binding	7	114	0.0614035	0.00470951	0.998234	0.366	1	PSBD_CHLRE	A8J8P6_CHLRE	A0A2K3E4W6_CHLRE	A0A2K3E6C1_CHLRE	A0A2K3CSM8_CHLRE	A0A2K3CSP0_CHLRE	A0A2K3E1V3_CHLRE
biological_process	GO:0006511	ubiquitin-dependent protein catabolic process	7	76	0.0921053	0.00134203	0.999363	0.187	1	A0A2K3CX46_CHLRE	A0A2K3DBV0_CHLRE	A0A2K3E6P0_CHLRE	A0A2K3DMX5_CHLRE	A0A2K3DYD0_CHLRE	A0A2K3CZZ2_CHLRE	A0A2K3CUI2_CHLRE
biological_process	GO:0045944	positive regulation of transcription by RNA polymerase II	7	33	0.212121	0.962852	0.0801787	1	1	A0A2K3CY22_CHLRE	A0A2K3D7C3_CHLRE	A0A2K3E5Y3_CHLRE	A0A2K3DWI1_CHLRE	A0A2K3D586_CHLRE	A0A2K3DS01_CHLRE	A0A2K3DNI2_CHLRE
molecular_function	GO:0008080	N-acetyltransferase activity	7	44	0.159091	0.589972	0.552671	1	1	A0A2K3E0V0_CHLRE	A0A2K3DSV1_CHLRE	A0A2K3D0T0_CHLRE	A0A2K3DSV2_CHLRE	A0A2K3DSX6_CHLRE	A0A2K3DQM1_CHLRE	A0A2K3D586_CHLRE
molecular_function	GO:0050661	NADP binding	7	30	0.233333	0.930049	0.152319	1	1	A8JFE8_CHLRE	A0A2K3DQR7_CHLRE	A0A2K3CT13_CHLRE	A0A2K3CYQ5_CHLRE	A0A2K3DQS5_CHLRE	A0A2K3DVK5_CHLRE	A0A2K3CRY4_CHLRE
biological_process	GO:0007052	mitotic spindle organization	7	22	0.318182	0.996611	0.011584	1	0.998	Q7X931_CHLRE	A0A2K3DJB1_CHLRE	A0A2K3DVM6_CHLRE	A0A2K3D170_CHLRE	A0A2K3DEX3_CHLRE	A0A2K3DZA7_CHLRE	A0A2K3CVM2_CHLRE
biological_process	GO:0006888	endoplasmic reticulum to Golgi vesicle-mediated transport	7	47	0.148936	0.726246	0.408274	1	1	A0A2K3D1Z8_CHLRE	A0A2K3D9Y7_CHLRE	A0A2K3CZA0_CHLRE	A0A2K3CQU9_CHLRE	A0A2K3E7U8_CHLRE	A0A2K3DP34_CHLRE	A0A2K3CQ49_CHLRE
biological_process	GO:0098703	calcium ion import across plasma membrane	7	15	0.466667	0.999622	0.00242386	1	0.673	A0A2K3DGB6_CHLRE	A0A2K3D9A7_CHLRE	A0A2K3DKM4_CHLRE	A0A2K3DP89_CHLRE	A0A2K3D1V4_CHLRE	A0A2K3DSB6_CHLRE	A0A2K3CP03_CHLRE
biological_process	GO:0030030	cell projection organization	7	19	0.368421	0.997464	0.00493573	1	0.913	A0A2K3D5V4_CHLRE	A0A2K3CY97_CHLRE	A0A2K3CUR8_CHLRE	A0A2K3DN16_CHLRE	A0A2K3D1N8_CHLRE	A0A2K3DV97_CHLRE	A0A2K3DQQ4_CHLRE
molecular_function	GO:0003887	DNA-directed DNA polymerase activity	7	21	0.333333	0.994517	0.0204304	1	1	A0A2K3CPZ5_CHLRE	A0A2K3DXP3_CHLRE	A0A2K3DKD8_CHLRE	A0A2K3CRE2_CHLRE	A0A2K3DDR6_CHLRE	A0A2K3D4A8_CHLRE	A0A2K3D744_CHLRE
molecular_function	GO:0043138	3'-5' DNA helicase activity	7	14	0.5	0.999799	0.00146738	1	0.319	A0A2K3D249_CHLRE	A0A2K3DZT7_CHLRE	A0A2K3DU69_CHLRE	A0A2K3E7T4_CHLRE	A0A2K3DQN1_CHLRE	A0A2K3DKR2_CHLRE	A0A2K3D275_CHLRE
cellular_component	GO:0005814	centriole	6	20	0.3	0.98511	0.0495657	1	1	A0A2K3CZX8_CHLRE	A0A2K3DNN4_CHLRE	A0A2K3D7G4_CHLRE	A0A2K3CP67_CHLRE	A0A2K3DH40_CHLRE	A0A2K3E6G2_CHLRE
molecular_function	GO:0004176	ATP-dependent peptidase activity	6	24	0.25	0.958218	0.109378	1	1	CLPP_CHLRE	A0A2K3E613_CHLRE	A0A2K3CYD2_CHLRE	A8INX1_CHLRE	A8IL08_CHLRE	A8IJ60_CHLRE
molecular_function	GO:0016791	phosphatase activity	6	35	0.171429	0.578594	0.508001	1	1	A0A2K3E151_CHLRE	A0A2K3DT23_CHLRE	A0A2K3E5C0_CHLRE	A0A2K3DW70_CHLRE	A0A2K3CSN0_CHLRE	A0A2K3E5D3_CHLRE
molecular_function	GO:0050660	flavin adenine dinucleotide binding	6	56	0.107143	0.13258	0.925842	1	1	A8JFE8_CHLRE	A0A2K3DQR7_CHLRE	A0A2K3CT13_CHLRE	A0A2K3DQS5_CHLRE	A0A2K3DVK5_CHLRE	A0A2K3CRY4_CHLRE
molecular_function	GO:0051082	unfolded protein binding	6	85	0.0705882	0.0360248	0.985282	0.988	1	A8IHL1_CHLRE	A0A2K3D650_CHLRE	A0A2K3DZS2_CHLRE	A0A2K3DDD4_CHLRE	A0A2K3DSK9_CHLRE	A0A2K3CTA3_CHLRE
cellular_component	GO:0005929	cilium	6	38	0.157895	0.986016	0.0216358	1	0.993	A9XPA7_CHLRE	A0A2K3DGG9_CHLRE	A0A2K3DAQ4_CHLRE	A0A2K3D881_CHLRE	A0A2K3E6H6_CHLRE	A8J2J7_CHLRE
cellular_component	GO:0005576	extracellular region	6	28	0.214286	0.830614	0.252992	1	1	A0A2K3E500_CHLRE	A0A2K3DWH7_CHLRE	A0A2K3DB77_CHLRE	A0A2K3DSA5_CHLRE	A0A2K3DS95_CHLRE	A0A2K3DB83_CHLRE
molecular_function	GO:0106306	protein serine/threonine phosphatase activity	6	34	0.176471	NA	NA	NA	NA	A8HY41_CHLRE	A0A2K3DPE5_CHLRE	A0A2K3DMB9_CHLRE	A0A2K3DPC6_CHLRE	A0A2K3DAN5_CHLRE	A0A2K3CTY6_CHLRE
molecular_function	GO:0106307	protein serine/threonine phosphatase activity	6	34	0.176471	NA	NA	NA	NA	A8HY41_CHLRE	A0A2K3DPE5_CHLRE	A0A2K3DMB9_CHLRE	A0A2K3DPC6_CHLRE	A0A2K3DAN5_CHLRE	A0A2K3CTY6_CHLRE
biological_process	GO:0051603	proteolysis involved in cellular protein catabolic process	6	24	0.25	0.0163815	0.98985	0.935	1	A0A2K3DCL8_CHLRE	A0A2K3DI22_CHLRE	A0A2K3CYQ1_CHLRE	A0A2K3E5G0_CHLRE	A0A2K3D637_CHLRE	A0A2K3CNP0_CHLRE
cellular_component	GO:1990904	ribonucleoprotein complex	6	39	0.153846	1.13055e-05	0.999995	0	1	A0A2K3E781_CHLRE	A0A2K3CQK5_CHLRE	A0A2K3DWP4_CHLRE	A0A2K3DE16_CHLRE	A0A2K3D8I4_CHLRE	A0A2K3D1S7_CHLRE
molecular_function	GO:0005096	GTPase activator activity	6	32	0.1875	0.685767	0.472308	1	1	A8J1B8_CHLRE	A0A2K3CQC9_CHLRE	A0A2K3CQD2_CHLRE	A0A2K3CQD4_CHLRE	A0A2K3DYN3_CHLRE	A0A2K3DUS6_CHLRE
cellular_component	GO:0005794	Golgi apparatus	6	169	0.035503	0.000119522	0.999948	0.012	1	A0A2K3D1Z8_CHLRE	A0A2K3DC67_CHLRE	A0A2K3DJA5_CHLRE	A0A2K3E340_CHLRE	A0A2K3DGH7_CHLRE	A0A2K3DP34_CHLRE
molecular_function	GO:0004693	cyclin-dependent protein serine/threonine kinase activity	6	23	0.26087	0.966475	0.0924787	1	1	A0A2K3DWM0_CHLRE	A0A2K3DR74_CHLRE	A0A2K3CWN0_CHLRE	A0A2K3E5P4_CHLRE	A0A2K3DRT5_CHLRE	A0A0M4M5H7_CHLRE
cellular_component	GO:0015629	actin cytoskeleton	6	12	0.5	0.967598	0.0900379	1	1	A0A2K3DLJ0_CHLRE	A0A2K3CTD1_CHLRE	A0A2K3D2S4_CHLRE	A0A2K3E275_CHLRE	A0A2K3DS34_CHLRE	A0A2K3DG07_CHLRE
molecular_function	GO:0003690	double-stranded DNA binding	6	30	0.2	0.999275	0.00146711	1	0.304	A0A2K3DUT4_CHLRE	A0A2K3DNY8_CHLRE	A0A2K3DNZ3_CHLRE	A0A2K3E874_CHLRE	A8J9F6_CHLRE	A0A2K3E2J9_CHLRE
cellular_component	GO:0005849	mRNA cleavage factor complex	6	16	0.375	0.988937	0.0329612	1	0.999	A0A2K3CWY3_CHLRE	A0A2K3DWB2_CHLRE	A0A2K3DEE7_CHLRE	A0A2K3DQM1_CHLRE	A0A2K3CYN8_CHLRE	A0A2K3D5Y2_CHLRE
molecular_function	GO:0000993	RNA polymerase II complex binding	6	24	0.25	0.977832	0.0619636	1	1	A0A2K3CWY3_CHLRE	A0A2K3DWB2_CHLRE	A0A2K3DEE7_CHLRE	A0A2K3DQM1_CHLRE	A0A2K3CYN8_CHLRE	A0A2K3D5Y2_CHLRE
biological_process	GO:0006369	termination of RNA polymerase II transcription	6	16	0.375	0.996208	0.0172576	1	1	A0A2K3CWY3_CHLRE	A0A2K3DWB2_CHLRE	A0A2K3DEE7_CHLRE	A0A2K3DQM1_CHLRE	A0A2K3CYN8_CHLRE	A0A2K3D5Y2_CHLRE
molecular_function	GO:0004499	N,N-dimethylaniline monooxygenase activity	6	11	0.545455	0.999792	0.00185469	1	0.454	A8JFE8_CHLRE	A0A2K3DQR7_CHLRE	A0A2K3CT13_CHLRE	A0A2K3DQS5_CHLRE	A0A2K3DVK5_CHLRE	A0A2K3CRY4_CHLRE
molecular_function	GO:0140359	ABC-type transporter activity	6	48	0.125	0.361446	0.771679	1	1	A0A2K3DKG7_CHLRE	A0A2K3DKG8_CHLRE	A0A2K3CQU1_CHLRE	A0A2K3D1B2_CHLRE	A0A2K3DRQ7_CHLRE	A0A2K3DUH3_CHLRE
biological_process	GO:0006260	DNA replication	6	27	0.222222	0.999626	0.000874772	1	0.316	A0A2K3D3N5_CHLRE	A0A2K3D646_CHLRE	A0A2K3D249_CHLRE	A0A2K3D701_CHLRE	A0A2K3CW19_CHLRE	A0A2K3D450_CHLRE
molecular_function	GO:0051959	dynein light intermediate chain binding	6	13	0.461538	0.999166	0.00536037	1	0.861	A0A2K3DN16_CHLRE	A0A2K3D1N8_CHLRE	A0A2K3DV97_CHLRE	A0A2K3E5K1_CHLRE	A0A2K3E6A9_CHLRE	A0A2K3DQQ4_CHLRE
molecular_function	GO:0004842	ubiquitin-protein transferase activity	6	68	0.0882353	0.00339271	0.99859	0.275	1	A0A2K3DW76_CHLRE	A0A2K3D4W4_CHLRE	A0A2K3D1C2_CHLRE	A0A2K3D8X8_CHLRE	A0A2K3DAN7_CHLRE	A0A2K3DB25_CHLRE
molecular_function	GO:2001070	starch binding	6	32	0.1875	0.847681	0.288338	1	1	A0A2K3D7T6_CHLRE	A0A2K3DW70_CHLRE	A0A2K3D1W5_CHLRE	A0A2K3DEH1_CHLRE	A0A2K3DFE3_CHLRE	A0A2K3DEF8_CHLRE
molecular_function	GO:0004713	protein tyrosine kinase activity	6	11	0.545455	0.999792	0.00185469	1	0.454	A0A2K3E5D4_CHLRE	A0A2K3E3Q1_CHLRE	A0A2K3DCT9_CHLRE	A0A2K3E389_CHLRE	A0A2K3DI28_CHLRE	A8JFV0_CHLRE
cellular_component	GO:0005654	nucleoplasm	6	32	0.1875	0.795534	0.270823	1	1	A0A2K3D8Y8_CHLRE	A0A2K3DI01_CHLRE	A0A2K3CW52_CHLRE	A0A2K3CPH6_CHLRE	A0A2K3DAX6_CHLRE	A0A2K3DKK4_CHLRE
biological_process	GO:0000077	DNA damage checkpoint signaling	6	8	0.75	0.999963	0.000190666	1	0.073	A0A2K3CYK0_CHLRE	A0A2K3DYP3_CHLRE	A0A2K3DTE2_CHLRE	A0A2K3DUS4_CHLRE	A0A2K3DCC3_CHLRE	A0A2K3D131_CHLRE
cellular_component	GO:0034751	aryl hydrocarbon receptor complex	6	9	0.666667	0.999972	0.000417404	1	0.076	A0A2K3D3A1_CHLRE	A0A2K3DLP6_CHLRE	A0A2K3DFM4_CHLRE	A0A2K3DE24_CHLRE	A0A2K3DF47_CHLRE	A0A2K3DK56_CHLRE
molecular_function	GO:0004879	nuclear receptor activity	6	10	0.6	0.999914	0.0009563	1	0.258	A0A2K3D3A1_CHLRE	A0A2K3DLP6_CHLRE	A0A2K3DFM4_CHLRE	A0A2K3DE24_CHLRE	A0A2K3DF47_CHLRE	A0A2K3DK56_CHLRE
biological_process	GO:0006805	xenobiotic metabolic process	6	11	0.545455	0.999562	0.00327674	1	0.808	A0A2K3D3A1_CHLRE	A0A2K3DLP6_CHLRE	A0A2K3DFM4_CHLRE	A0A2K3DE24_CHLRE	A0A2K3DF47_CHLRE	A0A2K3DK56_CHLRE
molecular_function	GO:0000287	magnesium ion binding	5	60	0.0833333	0.135	0.937308	1	1	A0A2K3E600_CHLRE	A0A2K3CTE4_CHLRE	A0A2K3DXV5_CHLRE	A0A2K3DST4_CHLRE	A0A2K3CZ59_CHLRE
molecular_function	GO:0004497	monooxygenase activity	5	52	0.0961538	0.7272	0.371721	1	1	A0A2K3E0N0_CHLRE	A0A2K3E4W6_CHLRE	A0A2K3E1Z1_CHLRE	A0A2K3CSM8_CHLRE	A0A2K3CSP0_CHLRE
cellular_component	GO:0009535	chloroplast thylakoid membrane	5	96	0.0520833	0.00471229	0.998576	0.249	1	ATPA_CHLRE	ATPF_CHLRE	PSBD_CHLRE	A0A2K3CQW3_CHLRE	B7U1J0_CHLRE
molecular_function	GO:0020037	heme binding	5	103	0.0485437	0.00232905	0.99934	0.217	1	A0A2K3CZA3_CHLRE	A0A2K3E4W6_CHLRE	A0A2K3CU48_CHLRE	A0A2K3CSM8_CHLRE	A0A2K3CSP0_CHLRE
molecular_function	GO:0051539	4 iron, 4 sulfur cluster binding	5	59	0.0847458	0.14586	0.931283	1	1	CHLB_CHLRE	A0A2K3DXP3_CHLRE	A0A2K3DVK1_CHLRE	A0A2K3DGD3_CHLRE	A0A2K3E1V3_CHLRE
biological_process	GO:0000045	autophagosome assembly	5	19	0.263158	0.890405	0.240758	1	1	A0A2K3DE59_CHLRE	A0A2K3DFH4_CHLRE	A0A2K3D3V2_CHLRE	A0A2K3D0T3_CHLRE	A0A2K3DFR2_CHLRE
biological_process	GO:0006457	protein folding	5	87	0.0574713	0.00238057	0.999112	0.321	1	A0A2K3D650_CHLRE	A0A2K3D6N3_CHLRE	A0A2K3D6N9_CHLRE	A0A2K3DVT4_CHLRE	A0A2K3DSK9_CHLRE
cellular_component	GO:0000785	chromatin	5	20	0.25	0.65694	0.455678	1	1	A0A2K3CUE4_CHLRE	A0A2K3E7W8_CHLRE	A0A2K3CRF0_CHLRE	A0A2K3DAW9_CHLRE	A0A2K3CW19_CHLRE
biological_process	GO:0015031	protein transport	5	65	0.0769231	0.0087995	0.994627	0.76	1	A8IRR6_CHLRE	A0A2K3E5D5_CHLRE	A0A2K3E134_CHLRE	A0A2K3DLC5_CHLRE	A8IR66_CHLRE
molecular_function	GO:0045505	dynein intermediate chain binding	5	18	0.277778	0.968787	0.0965148	1	1	A0A2K3DN16_CHLRE	A0A2K3D1N8_CHLRE	A0A2K3DV97_CHLRE	A0A2K3E6A9_CHLRE	A0A2K3DQQ4_CHLRE
cellular_component	GO:0005764	lysosome	5	20	0.25	0.875435	0.263598	1	1	A0A2K3DCL8_CHLRE	A0A2K3DI22_CHLRE	A0A2K3CYQ1_CHLRE	A0A2K3E5G0_CHLRE	A0A2K3CNP0_CHLRE
molecular_function	GO:0022857	transmembrane transporter activity	5	76	0.0657895	0.160655	0.867974	1	1	A0A2K3DHY0_CHLRE	A0A2K3E635_CHLRE	A0A2K3DHY3_CHLRE	A0A2K3DRS5_CHLRE	A0A2K3E827_CHLRE
molecular_function	GO:0061630	ubiquitin protein ligase activity	5	72	0.0694444	0.0378297	0.985584	0.992	1	A8IE95_CHLRE	A0A2K3E231_CHLRE	A0A2K3DM03_CHLRE	A0A2K3CS42_CHLRE	A0A2K3CZZ2_CHLRE
biological_process	GO:0016567	protein ubiquitination	5	72	0.0694444	0.000622044	0.999826	0.081	1	A8IE95_CHLRE	A0A2K3CVZ5_CHLRE	A0A2K3CS42_CHLRE	A0A2K3CZ15_CHLRE	A0A2K3CZZ2_CHLRE
cellular_component	GO:0030687	preribosome, large subunit precursor	5	24	0.208333	0.875435	0.263598	1	1	A8J0V5_CHLRE	A0A2K3D8Y8_CHLRE	A0A2K3DLP0_CHLRE	A0A2K3CPH6_CHLRE	A0A2K3DWG3_CHLRE
biological_process	GO:0000398	mRNA splicing, via spliceosome	5	84	0.0595238	0.00917116	0.996191	0.783	1	A8IC90_CHLRE	A0A2K3D159_CHLRE	A0A2K3DYQ0_CHLRE	A0A2K3DG81_CHLRE	A0A2K3CN31_CHLRE
biological_process	GO:0000422	autophagy of mitochondrion	5	17	0.294118	0.968728	0.0966965	1	1	A0A2K3DE59_CHLRE	A0A2K3DFH4_CHLRE	A0A2K3D3V2_CHLRE	A0A2K3D0T3_CHLRE	A0A2K3DFR2_CHLRE
cellular_component	GO:0000139	Golgi membrane	5	58	0.0862069	0.235031	0.85571	1	1	A0A2K3E340_CHLRE	A0A2K3CZA0_CHLRE	A0A2K3E5D5_CHLRE	A0A2K3D2W4_CHLRE	A8IR66_CHLRE
molecular_function	GO:0042393	histone binding	5	37	0.135135	0.770579	0.375262	1	1	A0A2K3D9Y5_CHLRE	A0A2K3DF59_CHLRE	A0A2K3E5Y3_CHLRE	A0A2K3D586_CHLRE	A0A2K3DNI2_CHLRE
molecular_function	GO:0004386	helicase activity	5	18	0.277778	0.999925	0.000174064	1	0.044	A8ICD8_CHLRE	A0A2K3DKJ5_CHLRE	A0A2K3D7L0_CHLRE	A0A2K3D7K3_CHLRE	A0A2K3D7K0_CHLRE
molecular_function	GO:0000166	nucleotide binding	5	38	0.131579	0.999985	2.0971e-05	1	0.003	A0A2K3D4L9_CHLRE	A0A2K3DXP3_CHLRE	A0A2K3D9B2_CHLRE	A0A2K3DXP6_CHLRE	A0A2K3DDR6_CHLRE
cellular_component	GO:0019898	extrinsic component of membrane	5	24	0.208333	0.586402	0.602088	1	1	A0A2K3CQQ3_CHLRE	A0A2K3DFH4_CHLRE	A0A2K3DAJ8_CHLRE	A0A2K3CQS6_CHLRE	A0A2K3D1L1_CHLRE
cellular_component	GO:0005815	microtubule organizing center	5	16	0.3125	0.951256	0.0917833	1	1	A0A2K3D9X2_CHLRE	A0A2K3D2P2_CHLRE	A0A2K3E171_CHLRE	A0A2K3CV39_CHLRE	A0A2K3CQR3_CHLRE
molecular_function	GO:0016298	lipase activity	5	17	0.294118	0.0481941	0.969547	0.998	1	A0A2K3DMS3_CHLRE	A0A2K3E3Y4_CHLRE	A0A2K3DDY6_CHLRE	A0A2K3E3Z8_CHLRE	A0A2K3CXN1_CHLRE
molecular_function	GO:0031267	small GTPase binding	5	20	0.25	0.948962	0.138414	1	1	A8J2W2_CHLRE	A0A2K3D1Z8_CHLRE	A0A2K3CWJ4_CHLRE	A0A2K3DP34_CHLRE	A0A2K3E0S6_CHLRE
cellular_component	GO:0000124	SAGA complex	5	18	0.277778	0.96974	0.0942602	1	1	A0A2K3D4R7_CHLRE	A0A2K3D666_CHLRE	A0A2K3E5F1_CHLRE	A0A2K3D274_CHLRE	A0A2K3E138_CHLRE
biological_process	GO:0055088	lipid homeostasis	5	19	0.263158	0.936596	0.162195	1	1	A0A2K3DTR7_CHLRE	A0A2K3DVN1_CHLRE	A0A2K3DEX6_CHLRE	A0A2K3E4S1_CHLRE	A0A2K3DEY9_CHLRE
biological_process	GO:0006396	RNA processing	5	31	0.16129	0.0290961	0.97847	0.997	1	A0A2K3DKX2_CHLRE	A0A2K3DRZ0_CHLRE	A0A2K3CP42_CHLRE	A0A2K3DRV7_CHLRE	A8IWK7_CHLRE
cellular_component	GO:0008180	COP9 signalosome	5	27	0.185185	0.835447	0.321079	1	1	A0A2K3DDI8_CHLRE	A0A2K3CX22_CHLRE	A0A2K3CYL5_CHLRE	A0A2K3CX56_CHLRE	A0A2K3CUI2_CHLRE
cellular_component	GO:0000781	chromosome, telomeric region	5	9	0.555556	0.999583	0.00403751	1	0.524	A0A2K3CYK0_CHLRE	A0A2K3DTE2_CHLRE	A0A2K3DUS4_CHLRE	A0A2K3DTX9_CHLRE	A0A2K3D131_CHLRE
biological_process	GO:0006397	mRNA processing	5	43	0.116279	0.0913306	0.939136	1	1	A0A2K3CZ19_CHLRE	A0A2K3D2S9_CHLRE	A0A2K3E1C6_CHLRE	A0A2K3E1G4_CHLRE	A0A2K3DXU2_CHLRE
biological_process	GO:0045893	positive regulation of transcription, DNA-templated	5	16	0.3125	0.976219	0.0473301	1	1	A0A2K3CR78_CHLRE	A0A2K3DTI9_CHLRE	A0A2K3CW52_CHLRE	A0A2K3CP13_CHLRE	A0A2K3DAX6_CHLRE
cellular_component	GO:0012507	ER to Golgi transport vesicle membrane	5	14	0.357143	0.974478	0.0750024	1	1	A0A2K3D9Y7_CHLRE	A0A2K3CQU9_CHLRE	A0A2K3E5D5_CHLRE	A0A2K3E7U8_CHLRE	A0A2K3CQ49_CHLRE
biological_process	GO:0006406	mRNA export from nucleus	5	24	0.208333	0.847363	0.288895	1	1	A0A2K3DQA7_CHLRE	A0A2K3D2S9_CHLRE	A0A2K3E683_CHLRE	A0A2K3DXU2_CHLRE	A0A2K3D847_CHLRE
molecular_function	GO:0005543	phospholipid binding	5	19	0.263158	0.737397	0.403999	1	1	A0A2K3D2S4_CHLRE	A0A2K3E275_CHLRE	A0A2K3CPF2_CHLRE	A0A2K3DS34_CHLRE	A0A2K3DMI1_CHLRE
biological_process	GO:0006874	cellular calcium ion homeostasis	5	23	0.217391	0.975318	0.0530542	1	1	A0A2K3D134_CHLRE	A0A2K3E1S8_CHLRE	A0A2K3DPQ3_CHLRE	A0A2K3DAJ9_CHLRE	A0A2K3DI77_CHLRE
molecular_function	GO:0000155	phosphorelay sensor kinase activity	5	12	0.416667	0.996729	0.0181944	1	0.998	A0A2K3CZT1_CHLRE	A0A2K3D8G4_CHLRE	A0A2K3CR54_CHLRE	A0A2K3DJT8_CHLRE	A0A2K3CR50_CHLRE
biological_process	GO:0042276	error-prone translesion synthesis	5	10	0.5	0.999042	0.0073888	1	0.956	A0A2K3DKD8_CHLRE	A0A2K3DDR6_CHLRE	A0A2K3D4A8_CHLRE	A0A2K3D9E2_CHLRE	A0A2K3D744_CHLRE
biological_process	GO:0044805	late nucleophagy	5	9	0.555556	0.999565	0.00417327	1	0.876	A0A2K3DE59_CHLRE	A0A2K3DFH4_CHLRE	A0A2K3D3V2_CHLRE	A0A2K3D0T3_CHLRE	A0A2K3DFR2_CHLRE
biological_process	GO:0034727	piecemeal microautophagy of the nucleus	5	10	0.5	0.998142	0.0119981	1	0.999	A0A2K3DE59_CHLRE	A0A2K3DFH4_CHLRE	A0A2K3D3V2_CHLRE	A0A2K3D0T3_CHLRE	A0A2K3DFR2_CHLRE
biological_process	GO:0042594	response to starvation	5	7	0.714286	0.99451	0.0204669	1	1	A0A2K3DE59_CHLRE	A0A2K3E4Z7_CHLRE	A0A2K3D3V2_CHLRE	A0A2K3D0T3_CHLRE	A0A2K3DFR2_CHLRE
biological_process	GO:0061709	reticulophagy	5	8	0.625	0.999836	0.00209629	1	0.644	A0A2K3DE59_CHLRE	A0A2K3DFH4_CHLRE	A0A2K3D3V2_CHLRE	A0A2K3D0T3_CHLRE	A0A2K3DFR2_CHLRE
biological_process	GO:0006302	double-strand break repair	5	13	0.384615	1	4.97861e-09	1	0	A0A2K3DQR5_CHLRE	A0A2K3DRA1_CHLRE	A0A2K3CRE2_CHLRE	A0A2K3DQG4_CHLRE	A0A2K3E874_CHLRE
molecular_function	GO:0046961	proton-transporting ATPase activity, rotational mechanism	4	11	0.363636	0.988024	0.0563628	1	1	ATPA_CHLRE	A8HQ97_CHLRE	A0A2K3DCJ6_CHLRE	B7U1J0_CHLRE
molecular_function	GO:0003924	GTPase activity	4	113	0.0353982	0.000203342	0.999958	0.019	1	A0A2K3E0D8_CHLRE	A0A2K3DA81_CHLRE	A0A2K3DSZ2_CHLRE	A0A2K3DHR8_CHLRE
biological_process	GO:0006515	protein quality control for misfolded or incompletely synthesized proteins	4	12	0.333333	0.921477	0.208116	1	1	CLPP_CHLRE	A0A2K3E892_CHLRE	A8INX1_CHLRE	A8IJ60_CHLRE
molecular_function	GO:0008289	lipid binding	4	22	0.181818	0.567259	0.556618	1	1	A8JFE2_CHLRE	A0A2K3DPY6_CHLRE	A0A2K3D8Z4_CHLRE	A0A2K3D0Q0_CHLRE
cellular_component	GO:0009579	thylakoid	4	23	0.173913	0.00883297	0.995928	0.407	1	A8JFE2_CHLRE	A0A2K3CW77_CHLRE	A0A2K3D195_CHLRE	A0A2K3CVZ5_CHLRE
cellular_component	GO:0043231	intracellular membrane-bounded organelle	4	69	0.057971	0.0617036	0.94572	0.994	1	A0A2K3D6N3_CHLRE	A0A2K3D6N9_CHLRE	A0A2K3E1E7_CHLRE	A0A2K3D2J3_CHLRE
biological_process	GO:0032259	methylation	4	52	0.0769231	0.0125939	0.993598	0.874	1	A0A2K3D1P5_CHLRE	A0A2K3DZG0_CHLRE	A0A2K3DZD7_CHLRE	Q6VPQ2_CHLRE
biological_process	GO:0006364	rRNA processing	4	56	0.0714286	0.161592	0.882353	1	1	A0A2K3D5D3_CHLRE	A0A2K3CNG0_CHLRE	A0A2K3CZX9_CHLRE	A0A2K3DWG3_CHLRE
biological_process	GO:0016192	vesicle-mediated transport	4	48	0.0833333	0.298737	0.766336	1	1	A0A2K3DVX3_CHLRE	A0A2K3D6F4_CHLRE	A8HXA2_CHLRE	A8IR66_CHLRE
cellular_component	GO:0019005	SCF ubiquitin ligase complex	4	42	0.0952381	0.284693	0.856059	1	1	A0A2K3CRV1_CHLRE	A0A2K3CXY5_CHLRE	A0A2K3DGP0_CHLRE	A0A2K3DQN5_CHLRE
biological_process	GO:0031146	SCF-dependent proteasomal ubiquitin-dependent protein catabolic process	4	42	0.0952381	0.277835	0.860553	1	1	A0A2K3CRV1_CHLRE	A0A2K3CXY5_CHLRE	A0A2K3DGP0_CHLRE	A0A2K3DQN5_CHLRE
biological_process	GO:0008380	RNA splicing	4	19	0.210526	0.0228437	0.988331	0.987	1	A8HPU4_CHLRE	A0A2K3DXU4_CHLRE	A0A2K3E1C6_CHLRE	A0A2K3E1G4_CHLRE
molecular_function	GO:0016779	nucleotidyltransferase activity	4	19	0.210526	0.759133	0.324753	1	1	A0A2K3E2T3_CHLRE	A0A2K3E5Z4_CHLRE	A0A2K3DPK8_CHLRE	A0A2K3DBH7_CHLRE
cellular_component	GO:0005681	spliceosomal complex	4	25	0.16	0.198917	0.878212	1	1	A0A2K3CWB5_CHLRE	A0A2K3CS69_CHLRE	A0A2K3DZI4_CHLRE	A0A2K3CN31_CHLRE
cellular_component	GO:0005876	spindle microtubule	4	16	0.25	0.990205	0.0324019	1	0.999	A0A2K3CVM7_CHLRE	A0A2K3D170_CHLRE	A0A2K3DEX3_CHLRE	A0A2K3CVM2_CHLRE
biological_process	GO:0032465	regulation of cytokinesis	4	14	0.285714	0.937638	0.177624	1	1	A0A2K3DYA1_CHLRE	A0A2K3D170_CHLRE	A0A2K3DEX3_CHLRE	A0A2K3CVM2_CHLRE
molecular_function	GO:0016279	protein-lysine N-methyltransferase activity	4	34	0.117647	0.859638	0.236659	1	1	A0A2K3CQ77_CHLRE	A0A2K3E5U1_CHLRE	A0A2K3DAB0_CHLRE	A0A2K3D711_CHLRE
biological_process	GO:0006325	chromatin organization	4	34	0.117647	0.539783	0.54883	1	1	A8JIK2_CHLRE	A0A2K3D1W7_CHLRE	A0A2K3DY38_CHLRE	A0A2K3DQ21_CHLRE
molecular_function	GO:0051015	actin filament binding	4	11	0.363636	0.988024	0.0563628	1	1	A0A2K3DLJ0_CHLRE	A0A2K3CTD1_CHLRE	A0A2K3DVB8_CHLRE	A0A2K3DG07_CHLRE
cellular_component	GO:0000932	P-body	4	24	0.166667	0.764209	0.435369	1	1	A8IMK5_CHLRE	A0A2K3D603_CHLRE	A0A2K3CYY3_CHLRE	A0A2K3DUR5_CHLRE
molecular_function	GO:0008094	ATP-dependent activity, acting on DNA	4	23	0.173913	0.999865	0.000284212	1	0.06	A0A2K3DJH5_CHLRE	A0A2K3DWI1_CHLRE	A0A2K3E133_CHLRE	A0A2K3CSQ1_CHLRE
molecular_function	GO:0051537	2 iron, 2 sulfur cluster binding	4	41	0.097561	0.299214	0.846725	1	1	Q2HZ21_CHLRE	A0A2K3DB48_CHLRE	A0A2K3CQL5_CHLRE	Q6V9B3_CHLRE
molecular_function	GO:0004553	hydrolase activity, hydrolyzing O-glycosyl compounds	4	20	0.2	0.986444	0.0289789	1	1	A0A2K3DNA7_CHLRE	A0A2K3D2V6_CHLRE	A0A2K3DX81_CHLRE	A0A2K3DYA8_CHLRE
biological_process	GO:0006338	chromatin remodeling	4	15	0.266667	0.946803	0.111864	1	1	A0A2K3E7W8_CHLRE	A0A2K3D3P2_CHLRE	A0A2K3DX10_CHLRE	A0A2K3DS27_CHLRE
cellular_component	GO:0034045	phagophore assembly site membrane	4	11	0.363636	0.988372	0.0551368	1	1	A0A2K3DE59_CHLRE	A0A2K3D3V2_CHLRE	A0A2K3D0T3_CHLRE	A0A2K3DFR2_CHLRE
cellular_component	GO:0001518	voltage-gated sodium channel complex	4	6	0.666667	0.999723	0.00445825	1	0.576	B9A0U9_CHLRE	A0A2K3CTS2_CHLRE	A0A2K3DAR0_CHLRE	A0A2K3DK32_CHLRE
molecular_function	GO:0005248	voltage-gated sodium channel activity	4	6	0.666667	0.999713	0.00457654	1	0.842	B9A0U9_CHLRE	A0A2K3CTS2_CHLRE	A0A2K3DAR0_CHLRE	A0A2K3DK32_CHLRE
molecular_function	GO:0003684	damaged DNA binding	4	27	0.148148	0.762043	0.41529	1	1	A0A2K3DUT4_CHLRE	A0A2K3DKD8_CHLRE	A0A2K3D4E3_CHLRE	A0A2K3D4A8_CHLRE
biological_process	GO:0000338	protein deneddylation	4	23	0.173913	0.786567	0.408105	1	1	A0A2K3DDI8_CHLRE	A0A2K3CX22_CHLRE	A0A2K3CYL5_CHLRE	A0A2K3CX56_CHLRE
cellular_component	GO:0035861	site of double-strand break	4	11	0.363636	0.988372	0.0551368	1	1	A0A2K3DUT4_CHLRE	A0A2K3DKD8_CHLRE	A0A2K3D4E3_CHLRE	A0A2K3D4A8_CHLRE
cellular_component	GO:0005768	endosome	4	32	0.125	0.261887	0.835997	1	1	A0A2K3E1S3_CHLRE	A0A2K3CPF2_CHLRE	A0A2K3D063_CHLRE	A0A2K3DLC5_CHLRE
biological_process	GO:0018107	peptidyl-threonine phosphorylation	4	20	0.2	0.861327	0.306323	1	1	A0A2K3E5D4_CHLRE	A0A2K3E3Q1_CHLRE	A0A2K3DI28_CHLRE	A0A2K3CXG1_CHLRE
biological_process	GO:0018026	peptidyl-lysine monomethylation	4	31	0.129032	0.554667	0.65146	1	1	A0A2K3CQ77_CHLRE	A0A2K3E5U1_CHLRE	A0A2K3DAB0_CHLRE	A0A2K3D711_CHLRE
molecular_function	GO:0005539	glycosaminoglycan binding	4	19	0.210526	0.88343	0.272353	1	1	Q9ATG5_CHLRE	A0A2K3CUG8_CHLRE	A0A2K3E0V8_CHLRE	A0A2K3DUP3_CHLRE
molecular_function	GO:0008449	N-acetylglucosamine-6-sulfatase activity	4	19	0.210526	0.88343	0.272353	1	1	Q9ATG5_CHLRE	A0A2K3CUG8_CHLRE	A0A2K3E0V8_CHLRE	A0A2K3DUP3_CHLRE
biological_process	GO:0070588	calcium ion transmembrane transport	4	27	0.148148	0.989366	0.0258757	1	1	A0A2K3D134_CHLRE	A0A2K3E1S8_CHLRE	A0A2K3DAJ9_CHLRE	A0A2K3DI77_CHLRE
cellular_component	GO:0005795	Golgi stack	4	10	0.4	0.923518	0.204188	1	1	A0A2K3D9Y7_CHLRE	A0A2K3CQU9_CHLRE	A0A2K3E7U8_CHLRE	A0A2K3CQ49_CHLRE
biological_process	GO:0048211	Golgi vesicle docking	4	10	0.4	0.992611	0.0402934	1	1	A0A2K3D9Y7_CHLRE	A0A2K3CQU9_CHLRE	A0A2K3E7U8_CHLRE	A0A2K3CQ49_CHLRE
cellular_component	GO:0005774	vacuolar membrane	4	17	0.235294	0.813277	0.33446	1	1	A0A2K3E3R5_CHLRE	A0A2K3E3P1_CHLRE	A0A2K3DCJ6_CHLRE	A0A2K3D1B6_CHLRE
biological_process	GO:0006811	ion transport	4	8	0.5	0.882609	0.157886	1	1	A8HXK4_CHLRE	A0A2K3D8L0_CHLRE	A0A2K3D8K3_CHLRE	A0A2K3DE27_CHLRE
biological_process	GO:0000070	mitotic sister chromatid segregation	4	10	0.4	0.999995	1.76346e-05	1	0.007	A0A2K3D6T3_CHLRE	A0A2K3DJH8_CHLRE	A0A2K3CRT3_CHLRE	A0A2K3DC11_CHLRE
biological_process	GO:0031509	subtelomeric heterochromatin assembly	4	7	0.571429	0.999111	0.00951208	1	0.98	A0A2K3CYK0_CHLRE	A0A2K3DTE2_CHLRE	A0A2K3DUS4_CHLRE	A0A2K3D131_CHLRE
molecular_function	GO:0045504	dynein heavy chain binding	4	8	0.5	0.997907	0.016898	1	0.996	Q5XPS1_CHLRE	A0A2K3D9P4_CHLRE	A8J3B6_CHLRE	H6UI23_CHLRE
molecular_function	GO:0045503	dynein light chain binding	4	6	0.666667	0.999713	0.00457654	1	0.842	Q5XPS1_CHLRE	A0A2K3D9P4_CHLRE	A8J3B6_CHLRE	H6UI23_CHLRE
molecular_function	GO:0008146	sulfotransferase activity	4	18	0.222222	0.759679	0.440934	1	1	A0A2K3DC67_CHLRE	A0A2K3DFV9_CHLRE	A0A2K3D7P8_CHLRE	A0A2K3DZN5_CHLRE
molecular_function	GO:0009927	histidine phosphotransfer kinase activity	4	10	0.4	0.992624	0.0402223	1	1	A0A2K3CZT1_CHLRE	A0A2K3D8G4_CHLRE	A0A2K3CR54_CHLRE	A0A2K3DJT8_CHLRE
molecular_function	GO:0005262	calcium channel activity	4	15	0.266667	0.890622	0.240321	1	1	A0A2K3D134_CHLRE	A0A2K3E1S8_CHLRE	A0A2K3DAJ9_CHLRE	A0A2K3DI77_CHLRE
molecular_function	GO:0017056	structural constituent of nuclear pore	4	23	0.173913	0.786959	0.407498	1	1	A0A2K3DQA7_CHLRE	A0A2K3D472_CHLRE	A0A2K3DMI1_CHLRE	A0A2K3D847_CHLRE
biological_process	GO:0045053	protein retention in Golgi apparatus	4	4	1	1	0.000387312	1	0.175	A0A2K3CQQ3_CHLRE	A0A2K3DAJ8_CHLRE	A0A2K3CQS6_CHLRE	A0A2K3D1L1_CHLRE
molecular_function	GO:0015631	tubulin binding	4	22	0.181818	0.999938	0.000144543	1	0.034	A0A2K3CZX8_CHLRE	A0A2K3D881_CHLRE	A0A2K3DNN4_CHLRE	A0A2K3E6G2_CHLRE
molecular_function	GO:0008408	3'-5' exonuclease activity	4	16	0.25	0.896107	0.185802	1	1	A0A2K3DZS1_CHLRE	A0A2K3DB70_CHLRE	A0A2K3DZ32_CHLRE	A0A2K3DSJ8_CHLRE
cellular_component	GO:0042555	MCM complex	4	8	0.5	0.997974	0.0164895	1	0.92	A0A2K3E6D5_CHLRE	A0A2K3DIP5_CHLRE	A0A2K3CTV1_CHLRE	A0A2K3D702_CHLRE
molecular_function	GO:0004721	phosphoprotein phosphatase activity	4	12	0.333333	0.662341	0.449983	1	1	A0A2K3DN43_CHLRE	A0A2K3DJ84_CHLRE	A0A2K3DPV7_CHLRE	A0A2K3CT99_CHLRE
biological_process	GO:0010387	COP9 signalosome assembly	4	19	0.210526	0.883211	0.272793	1	1	A0A2K3DDI8_CHLRE	A0A2K3CX22_CHLRE	A0A2K3CYL5_CHLRE	A0A2K3CX56_CHLRE
molecular_function	GO:0031151	histone methyltransferase activity (H3-K79 specific)	4	5	0.8	0.999946	0.00171676	1	0.406	A0A2K3CYK0_CHLRE	A0A2K3DTE2_CHLRE	A0A2K3DUS4_CHLRE	A0A2K3D131_CHLRE
biological_process	GO:2000677	regulation of transcription regulatory region DNA binding	4	5	0.8	0.999946	0.00171974	1	0.553	A0A2K3CYK0_CHLRE	A0A2K3DTE2_CHLRE	A0A2K3DUS4_CHLRE	A0A2K3D131_CHLRE
biological_process	GO:0032508	DNA duplex unwinding	4	19	0.210526	0.852241	0.297806	1	1	A0A2K3D646_CHLRE	A0A2K3E158_CHLRE	A0A2K3DU69_CHLRE	A0A2K3D275_CHLRE
biological_process	GO:0007062	sister chromatid cohesion	4	5	0.8	1	6.18778e-07	1	0	A0A2K3D6T3_CHLRE	A0A2K3CRF0_CHLRE	A0A2K3DAG5_CHLRE	A0A2K3DAG6_CHLRE
cellular_component	GO:0031982	vesicle	4	5	0.8	0.553208	0.5411	1	1	A0A2K3CTD1_CHLRE	A0A2K3E1E7_CHLRE	A0A2K3D2J3_CHLRE	A0A2K3DG07_CHLRE
cellular_component	GO:0005694	chromosome	4	14	0.285714	0.99459	0.00885039	1	0.743	A0A2K3E3D8_CHLRE	A0A2K3DQG4_CHLRE	A0A2K3DU69_CHLRE	A0A2K3D275_CHLRE
molecular_function	GO:0008234	cysteine-type peptidase activity	4	17	0.235294	0.938356	0.0999431	1	1	A0A2K3E4F7_CHLRE	A0A2K3CZ29_CHLRE	A0A2K3CRE5_CHLRE	A0A2K3CYP9_CHLRE
biological_process	GO:0061025	membrane fusion	4	10	0.4	0.934226	0.138335	1	1	A0A2K3D9Y7_CHLRE	A0A2K3CQU9_CHLRE	A0A2K3E7U8_CHLRE	A0A2K3CQ49_CHLRE
biological_process	GO:0045056	transcytosis	4	9	0.444444	0.995827	0.0271315	1	1	A0A2K3D9Y7_CHLRE	A0A2K3CQU9_CHLRE	A0A2K3E7U8_CHLRE	A0A2K3CQ49_CHLRE
molecular_function	GO:0003735	structural constituent of ribosome	3	186	0.016129	2.34789e-09	1	0	1	RR2A_CHLRE	RR3_CHLRE	A8J5Z0_CHLRE
molecular_function	GO:0046933	proton-transporting ATP synthase activity, rotational mechanism	3	17	0.176471	0.79223	0.434324	1	1	ATPA_CHLRE	ATPF_CHLRE	B7U1J0_CHLRE
cellular_component	GO:0009368	endopeptidase Clp complex	3	9	0.333333	0.973549	0.118871	1	1	CLPP_CHLRE	A8INX1_CHLRE	A8IJ60_CHLRE
molecular_function	GO:0051117	ATPase binding	3	12	0.25	0.924553	0.231489	1	1	CLPP_CHLRE	A8INX1_CHLRE	A8IJ60_CHLRE
molecular_function	GO:0003899	DNA-directed 5'-3' RNA polymerase activity	3	30	0.1	0.443108	0.744094	1	1	RPOB1_CHLRE	RPC1A_CHLRE	A0A2K3D6S1_CHLRE
molecular_function	GO:0046983	protein dimerization activity	3	26	0.115385	0.0276808	0.989047	0.955	1	Q65Z16_CHLRE	A0A2K3CYQ9_CHLRE	A0A2K3CZR4_CHLRE
biological_process	GO:0006351	transcription, DNA-templated	3	27	0.111111	1	2.07643e-09	1	0	RPOB1_CHLRE	Q65Z16_CHLRE	A0A2K3D6S1_CHLRE
molecular_function	GO:0016705	oxidoreductase activity, acting on paired donors, with incorporation or reduction of molecular oxygen	3	48	0.0625	0.0508917	0.97255	0.999	1	A0A2K3E4W6_CHLRE	A0A2K3CSM8_CHLRE	A0A2K3CSP0_CHLRE
biological_process	GO:0000226	microtubule cytoskeleton organization	3	28	0.107143	0.987717	0.0217557	1	1	A8J7M5_CHLRE	A0A2K3D881_CHLRE	A0A2K3DVC5_CHLRE
biological_process	GO:0000278	mitotic cell cycle	3	20	0.15	0.999997	6.9022e-06	1	0.002	A0A2K3CVM7_CHLRE	A0A2K3DYA1_CHLRE	A0A2K3DXP3_CHLRE
molecular_function	GO:0071949	FAD binding	3	48	0.0625	0.079673	0.972965	1	1	A0A2K3E0N0_CHLRE	A0A2K3E1Z1_CHLRE	A0A2K3CYG8_CHLRE
biological_process	GO:0051085	chaperone cofactor-dependent protein refolding	3	34	0.0882353	0.276542	0.875381	1	1	A8IHL1_CHLRE	A0A2K3DZS2_CHLRE	A0A2K3DDD4_CHLRE
biological_process	GO:0042026	protein refolding	3	30	0.1	0.375137	0.813924	1	1	A8IHL1_CHLRE	A0A2K3DZS2_CHLRE	A0A2K3DDD4_CHLRE
cellular_component	GO:0071013	catalytic step 2 spliceosome	3	32	0.09375	0.221794	0.905851	1	1	A0A2K3D159_CHLRE	A0A2K3E5Q8_CHLRE	A0A2K3DKK4_CHLRE
molecular_function	GO:0000049	tRNA binding	3	45	0.0666667	0.106157	0.961928	1	1	A8IXY0_CHLRE	A8J168_CHLRE	A0A2K3E0D8_CHLRE
molecular_function	GO:0005249	voltage-gated potassium channel activity	3	14	0.214286	0.79223	0.434324	1	1	A0A2K3D845_CHLRE	A0A2K3DRI4_CHLRE	A0A2K3E4W0_CHLRE
biological_process	GO:0071805	potassium ion transmembrane transport	3	18	0.166667	0.625751	0.615214	1	1	A0A2K3DSM2_CHLRE	A0A2K3D845_CHLRE	A0A2K3E4W0_CHLRE
molecular_function	GO:0005315	inorganic phosphate transmembrane transporter activity	3	17	0.176471	0.79223	0.434324	1	1	Q8LP68_CHLRE	A0A2K3CVU6_CHLRE	A0A2K3CVV6_CHLRE
molecular_function	GO:0015293	symporter activity	3	15	0.2	0.526216	0.702292	1	1	Q8LP68_CHLRE	A0A2K3CVU6_CHLRE	A0A2K3CVV6_CHLRE
biological_process	GO:0006606	protein import into nucleus	3	30	0.1	0.255156	0.887619	1	1	A0A2K3D472_CHLRE	A0A2K3E0S6_CHLRE	A0A2K3DMI1_CHLRE
molecular_function	GO:0003743	translation initiation factor activity	3	46	0.0652174	0.0965718	0.966009	1	1	A0A2K3E0D8_CHLRE	A0A2K3DHR8_CHLRE	A0A2K3D4R1_CHLRE
cellular_component	GO:0005789	endoplasmic reticulum membrane	3	86	0.0348837	4.55748e-06	0.999999	0	1	A0A2K3CUP4_CHLRE	A0A2K3DAZ2_CHLRE	A8J5T5_CHLRE
molecular_function	GO:0016757	glycosyltransferase activity	3	99	0.030303	1.83356e-05	0.999994	0.002	1	A0A2K3DJA5_CHLRE	A0A2K3DGH7_CHLRE	A0A2K3DAV0_CHLRE
biological_process	GO:0043622	cortical microtubule organization	3	5	0.6	0.99828	0.022164	1	1	A8JF07_CHLRE	A0A2K3D7B9_CHLRE	A0A2K3D7C1_CHLRE
molecular_function	GO:0016616	oxidoreductase activity, acting on the CH-OH group of donors, NAD or NADP as acceptor	3	32	0.09375	0.0075392	0.997218	0.539	1	A0A2K3D509_CHLRE	A0A2K3DCS1_CHLRE	A0A2K3CYQ5_CHLRE
cellular_component	GO:0032133	chromosome passenger complex	3	13	0.230769	0.904638	0.268113	1	1	A0A2K3D170_CHLRE	A0A2K3DEX3_CHLRE	A0A2K3CVM2_CHLRE
cellular_component	GO:0051233	spindle midzone	3	14	0.214286	0.98511	0.0495657	1	1	A0A2K3D170_CHLRE	A0A2K3DEX3_CHLRE	A0A2K3CVM2_CHLRE
molecular_function	GO:0035174	histone serine kinase activity	3	13	0.230769	0.902672	0.271737	1	1	A0A2K3D170_CHLRE	A0A2K3DEX3_CHLRE	A0A2K3CVM2_CHLRE
biological_process	GO:0048278	vesicle docking	3	11	0.272727	0.993205	0.0222065	1	1	A8I205_CHLRE	A0A2K3D7G4_CHLRE	A0A2K3CP67_CHLRE
biological_process	GO:0007049	cell cycle	3	22	0.136364	1	1.53621e-07	1	0	A0A2K3E6D5_CHLRE	A0A2K3DBV0_CHLRE	A0A2K3D2G9_CHLRE
biological_process	GO:0006368	transcription elongation from RNA polymerase II promoter	3	12	0.25	0.903303	0.23995	1	1	A0A2K3DF59_CHLRE	A0A2K3CSD5_CHLRE	A0A2K3D701_CHLRE
biological_process	GO:0006099	tricarboxylic acid cycle	3	24	0.125	0.558426	0.675523	1	1	A0A2K3CVJ4_CHLRE	A0A2K3DX44_CHLRE	A0A2K3D8D0_CHLRE
molecular_function	GO:0030246	carbohydrate binding	3	17	0.176471	0.240312	0.851904	1	1	A0A2K3D619_CHLRE	A0A2K3DHX9_CHLRE	A0A2K3DYA8_CHLRE
biological_process	GO:0045292	mRNA cis splicing, via spliceosome	3	19	0.157895	0.625751	0.615214	1	1	A0A2K3CWB5_CHLRE	A0A2K3CS69_CHLRE	A0A2K3DZI4_CHLRE
biological_process	GO:0006270	DNA replication initiation	3	14	0.214286	0.837805	0.340236	1	1	A0A2K3E6D5_CHLRE	A0A2K3D3Q7_CHLRE	A0A2K3DW68_CHLRE
cellular_component	GO:0016514	SWI/SNF complex	3	13	0.230769	0.904638	0.268113	1	1	A0A2K3CR78_CHLRE	A0A2K3DTI9_CHLRE	A0A2K3CRK4_CHLRE
biological_process	GO:0006891	intra-Golgi vesicle-mediated transport	3	19	0.157895	0.693677	0.547766	1	1	A0A2K3DI62_CHLRE	A0A2K3DUF8_CHLRE	A0A2K3CZA0_CHLRE
biological_process	GO:1905515	non-motile cilium assembly	3	12	0.25	0.924421	0.231821	1	1	A0A2K3CRT2_CHLRE	A0A2K3CTH6_CHLRE	A0A2K3CYV6_CHLRE
biological_process	GO:0000723	telomere maintenance	3	14	0.214286	0.852241	0.297806	1	1	A8ICD8_CHLRE	A0A2K3D646_CHLRE	A0A2K3DCC3_CHLRE
cellular_component	GO:0005680	anaphase-promoting complex	3	12	0.25	0.926135	0.228248	1	1	A0A2K3DBV0_CHLRE	A0A2K3CVZ5_CHLRE	A0A2K3CZ15_CHLRE
biological_process	GO:0006487	protein N-linked glycosylation	3	21	0.142857	0.34854	0.831331	1	1	A0A2K3DHP2_CHLRE	A0A2K3E7F7_CHLRE	A0A2K3DAZ2_CHLRE
cellular_component	GO:0030015	CCR4-NOT core complex	3	6	0.5	0.995542	0.0389526	1	1	A8IMK5_CHLRE	A0A2K3CYY3_CHLRE	A0A2K3DUR5_CHLRE
biological_process	GO:0006367	transcription initiation from RNA polymerase II promoter	3	12	0.25	0.702194	0.506573	1	1	A0A2K3CY93_CHLRE	A0A2K3DQN1_CHLRE	A0A2K3CXD2_CHLRE
cellular_component	GO:0005811	lipid droplet	3	14	0.214286	0.88058	0.308666	1	1	A0A2K3DTR7_CHLRE	A0A2K3DEX6_CHLRE	A0A2K3DEY9_CHLRE
molecular_function	GO:0004806	triglyceride lipase activity	3	10	0.3	0.959778	0.155356	1	1	A0A2K3DTR7_CHLRE	A0A2K3DEX6_CHLRE	A0A2K3DEY9_CHLRE
biological_process	GO:0019433	triglyceride catabolic process	3	9	0.333333	0.972868	0.121	1	1	A0A2K3DTR7_CHLRE	A0A2K3DEX6_CHLRE	A0A2K3DEY9_CHLRE
biological_process	GO:0005978	glycogen biosynthetic process	3	8	0.375	0.983072	0.0897103	1	1	Q9LLL6_CHLRE	A0A2K3DNA7_CHLRE	A0A2K3DJX2_CHLRE
cellular_component	GO:0005657	replication fork	3	18	0.166667	0.776333	0.36819	1	1	A0A2K3D646_CHLRE	A0A2K3DKD8_CHLRE	A0A2K3D4A8_CHLRE
molecular_function	GO:0003725	double-stranded RNA binding	3	29	0.103448	0.555391	0.650695	1	1	A0A2K3DKX2_CHLRE	A0A2K3DQR5_CHLRE	A0A2K3CP42_CHLRE
molecular_function	GO:0015095	magnesium ion transmembrane transporter activity	3	14	0.214286	0.878213	0.312633	1	1	A0A2K3DQB3_CHLRE	A0A2K3E6W7_CHLRE	A0A2K3CZ59_CHLRE
biological_process	GO:0006268	DNA unwinding involved in DNA replication	3	12	0.25	0.924421	0.231821	1	1	A0A2K3DIP5_CHLRE	A0A2K3DU69_CHLRE	A0A2K3D275_CHLRE
molecular_function	GO:0005267	potassium channel activity	3	4	0.75	0.97957	0.0632806	1	1	A0A2K3E3R5_CHLRE	A0A2K3E3P1_CHLRE	A0A2K3D1B6_CHLRE
biological_process	GO:0001510	RNA methylation	3	15	0.2	0.0758076	0.968101	1	1	A0A2K3D8E4_CHLRE	A0A2K3CSN9_CHLRE	A0A2K3CSQ1_CHLRE
biological_process	GO:0000289	nuclear-transcribed mRNA poly(A) tail shortening	3	9	0.333333	0.959707	0.155588	1	1	A8IMK5_CHLRE	A0A2K3DUR5_CHLRE	A0A2K3D7N1_CHLRE
molecular_function	GO:0043021	ribonucleoprotein complex binding	3	6	0.5	0.228321	0.875181	1	1	A0A2K3D8Y8_CHLRE	A0A2K3DWP4_CHLRE	A0A2K3CPH6_CHLRE
cellular_component	GO:0030173	integral component of Golgi membrane	3	20	0.15	0.6315	0.609549	1	1	A0A2K3DI62_CHLRE	A0A2K3DUF8_CHLRE	A0A2K3DLV1_CHLRE
biological_process	GO:0061024	membrane organization	3	8	0.375	0.740103	0.357382	1	1	A0A2K3D2S4_CHLRE	A0A2K3E275_CHLRE	A0A2K3DS34_CHLRE
biological_process	GO:0006813	potassium ion transport	3	15	0.2	0.742982	0.421179	1	1	A0A2K3DG90_CHLRE	A0A2K3DT99_CHLRE	A0A2K3CUL6_CHLRE
molecular_function	GO:0003779	actin binding	3	17	0.176471	0.958375	0.101684	1	1	A0A2K3D2S4_CHLRE	A0A2K3E275_CHLRE	A0A2K3DS34_CHLRE
biological_process	GO:0033314	mitotic DNA replication checkpoint signaling	3	7	0.428571	0.990488	0.0624169	1	1	A0A2K3D3Q7_CHLRE	A0A2K3DYP3_CHLRE	A0A2K3DW68_CHLRE
biological_process	GO:0048478	replication fork protection	3	6	0.5	0.995415	0.0397434	1	1	A0A2K3D2G9_CHLRE	A0A2K3D1T7_CHLRE	A0A2K3DSU7_CHLRE
biological_process	GO:0031123	RNA 3'-end processing	3	11	0.272727	0.863077	0.218431	1	1	A0A2K3E5Z4_CHLRE	A0A2K3DPK8_CHLRE	A0A2K3DBH7_CHLRE
molecular_function	GO:0031490	chromatin DNA binding	3	15	0.2	0.760443	0.473277	1	1	A0A2K3CUE4_CHLRE	A0A2K3CT32_CHLRE	A0A2K3DAW9_CHLRE
biological_process	GO:0036158	outer dynein arm assembly	3	11	0.272727	0.943538	0.19276	1	1	A0A2K3DGG9_CHLRE	A0A2K3DDL5_CHLRE	A0A2K3CUD8_CHLRE
biological_process	GO:0036159	inner dynein arm assembly	3	10	0.3	0.959707	0.155588	1	1	A0A2K3DDL5_CHLRE	A0A2K3CUD8_CHLRE	A8J3B6_CHLRE
cellular_component	GO:0000445	THO complex part of transcription export complex	3	11	0.272727	0.944863	0.189652	1	1	A0A2K3D2S9_CHLRE	A0A2K3E683_CHLRE	A0A2K3DXU2_CHLRE
molecular_function	GO:0050825	ice binding	3	17	0.176471	0.79223	0.434324	1	1	A0A2K3CVB6_CHLRE	A0A2K3CWJ4_CHLRE	A0A2K3DHQ5_CHLRE
biological_process	GO:0007019	microtubule depolymerization	3	7	0.428571	0.990488	0.0624169	1	1	A0A2K3DJH8_CHLRE	A0A2K3CRT3_CHLRE	A0A2K3DC11_CHLRE
cellular_component	GO:0031235	intrinsic component of the cytoplasmic side of the plasma membrane	3	7	0.428571	0.990742	0.0612237	1	1	A0A2K3D2S4_CHLRE	A0A2K3E275_CHLRE	A0A2K3DS34_CHLRE
biological_process	GO:0030031	cell projection assembly	3	8	0.375	0.973124	0.0473936	1	1	A0A2K3D2S4_CHLRE	A0A2K3E275_CHLRE	A0A2K3DS34_CHLRE
biological_process	GO:0006401	RNA catabolic process	3	13	0.230769	0.992315	0.0133548	1	1	A0A2K3DAX3_CHLRE	A0A2K3DIB3_CHLRE	A0A2K3CS00_CHLRE
biological_process	GO:0007030	Golgi organization	3	14	0.214286	0.822376	0.394853	1	1	A0A2K3D1Z8_CHLRE	A0A2K3E5D5_CHLRE	A0A2K3DP34_CHLRE
biological_process	GO:0006261	DNA-dependent DNA replication	3	15	0.2	0.998633	0.00330758	1	0.809	A0A2K3E6P6_CHLRE	A0A2K3CRE2_CHLRE	A0A2K3D9E2_CHLRE
biological_process	GO:0045892	negative regulation of transcription, DNA-templated	3	14	0.214286	0.938591	0.125624	1	1	A0A2K3CW52_CHLRE	A0A2K3DAX6_CHLRE	A0A2K3DNI2_CHLRE
molecular_function	GO:0000175	3'-5'-exoribonuclease activity	3	23	0.130435	0.559066	0.674871	1	1	A0A2K3D388_CHLRE	A0A2K3D7N1_CHLRE	A0A2K3E7G4_CHLRE
biological_process	GO:0000184	nuclear-transcribed mRNA catabolic process, nonsense-mediated decay	3	14	0.214286	0.851192	0.354122	1	1	A0A2K3E844_CHLRE	A0A2K3E1C7_CHLRE	A0A2K3DKW8_CHLRE
cellular_component	GO:0000922	spindle pole	3	12	0.25	0.904638	0.268113	1	1	A0A2K3DYA1_CHLRE	A0A2K3DVM6_CHLRE	A0A2K3E171_CHLRE
molecular_function	GO:0008420	RNA polymerase II CTD heptapeptide repeat phosphatase activity	3	12	0.25	0.924553	0.231489	1	1	A0A2K3DPN5_CHLRE	A0A2K3DLZ6_CHLRE	A0A2K3DPP9_CHLRE
biological_process	GO:0070940	dephosphorylation of RNA polymerase II C-terminal domain	3	12	0.25	0.924421	0.231821	1	1	A0A2K3DPN5_CHLRE	A0A2K3DLZ6_CHLRE	A0A2K3DPP9_CHLRE
biological_process	GO:0032968	positive regulation of transcription elongation from RNA polymerase II promoter	3	6	0.5	0.995415	0.0397434	1	1	A0A2K3DF59_CHLRE	A0A2K3CSD5_CHLRE	A0A2K3D701_CHLRE
molecular_function	GO:0009378	four-way junction helicase activity	3	8	0.375	0.983102	0.0895718	1	1	A0A2K3DZT7_CHLRE	A0A2K3DU69_CHLRE	A0A2K3D275_CHLRE
biological_process	GO:0000463	maturation of LSU-rRNA from tricistronic rRNA transcript (SSU-rRNA, 5.8S rRNA, LSU-rRNA)	3	12	0.25	0.902503	0.272118	1	1	A0A2K3E7Y1_CHLRE	A0A2K3D8Y8_CHLRE	A0A2K3CPH6_CHLRE
biological_process	GO:0000727	double-strand break repair via break-induced replication	3	10	0.3	0.959707	0.155588	1	1	A0A2K3E6D5_CHLRE	A0A2K3D5X4_CHLRE	A0A2K3DIP5_CHLRE
molecular_function	GO:0008574	plus-end-directed microtubule motor activity	3	10	0.3	0.959778	0.155356	1	1	A0A2K3DJH8_CHLRE	A0A2K3CRT3_CHLRE	A0A2K3DC11_CHLRE
biological_process	GO:0031297	replication fork processing	3	5	0.6	0.999042	0.0073888	1	0.956	A0A2K3D1T7_CHLRE	A0A2K3DSU7_CHLRE	A0A2K3D744_CHLRE
biological_process	GO:0007095	mitotic G2 DNA damage checkpoint signaling	3	5	0.6	0.99828	0.022164	1	1	A0A2K3E736_CHLRE	A0A2K3D3Q7_CHLRE	A0A2K3DW68_CHLRE
molecular_function	GO:0016407	acetyltransferase activity	3	7	0.428571	0.801695	0.295969	1	1	A0A2K3CNT1_CHLRE	A0A2K3D6T3_CHLRE	A0A2K3CNT9_CHLRE
molecular_function	GO:0017178	diphthine-ammonia ligase activity	3	3	1	1	0.00276034	1	0.678	A0A2K3E6Y1_CHLRE	A0A2K3E6X6_CHLRE	A0A2K3E6V0_CHLRE
molecular_function	GO:0030276	clathrin binding	3	5	0.6	0.924553	0.231489	1	1	A0A2K3E1E7_CHLRE	A0A2K3CPF2_CHLRE	A0A2K3D2J3_CHLRE
biological_process	GO:0000725	recombinational repair	3	6	0.5	1	2.37456e-09	1	0	A0A2K3DZA3_CHLRE	A0A2K3E7T4_CHLRE	A0A2K3DKR2_CHLRE
cellular_component	GO:0061673	mitotic spindle astral microtubule	3	6	0.5	0.995542	0.0389526	1	1	A0A2K3DJH8_CHLRE	A0A2K3CRT3_CHLRE	A0A2K3DC11_CHLRE
cellular_component	GO:1990023	mitotic spindle midzone	3	6	0.5	0.995542	0.0389526	1	1	A0A2K3DJH8_CHLRE	A0A2K3CRT3_CHLRE	A0A2K3DC11_CHLRE
biological_process	GO:0006865	amino acid transport	3	8	0.375	0.861327	0.306323	1	1	A0A2K3CW12_CHLRE	A0A2K3D7D7_CHLRE	A8IF06_CHLRE
molecular_function	GO:0032452	histone demethylase activity	3	5	0.6	0.998145	0.0119765	1	0.985	A0A2K3D3P2_CHLRE	A0A2K3DX10_CHLRE	A0A2K3DN88_CHLRE
molecular_function	GO:0008964	phosphoenolpyruvate carboxylase activity	3	3	1	1	0.00276034	1	0.678	A0A2K3CVJ4_CHLRE	A0A2K3DX44_CHLRE	A0A2K3D8D0_CHLRE
biological_process	GO:0015977	carbon fixation	3	6	0.5	0.959707	0.155588	1	1	A0A2K3CVJ4_CHLRE	A0A2K3DX44_CHLRE	A0A2K3D8D0_CHLRE
cellular_component	GO:0030915	Smc5-Smc6 complex	3	8	0.375	0.983511	0.0880642	1	1	A0A2K3D4E3_CHLRE	A0A2K3DAG5_CHLRE	A0A2K3DAG6_CHLRE
biological_process	GO:0006412	translation	2	167	0.011976	1.2209e-08	1	0	1	RR2A_CHLRE	RR3_CHLRE
biological_process	GO:0000027	ribosomal large subunit assembly	2	17	0.117647	0.526148	0.742032	1	1	A8J5Z0_CHLRE	A0A2K3DWG3_CHLRE
cellular_component	GO:0045263	proton-transporting ATP synthase complex, coupling factor F(o)	2	7	0.285714	0.911936	0.309218	1	1	ATPF_CHLRE	A8JFE2_CHLRE
cellular_component	GO:0045261	proton-transporting ATP synthase complex, catalytic core F(1)	2	9	0.222222	0.691334	0.600787	1	1	ATPA_CHLRE	B7U1J0_CHLRE
biological_process	GO:0015986	ATP synthesis coupled proton transport	2	15	0.133333	0.48845	0.769147	1	1	ATPA_CHLRE	A8JFE2_CHLRE
molecular_function	GO:0009055	electron transfer activity	2	33	0.0606061	0.0823385	0.96795	1	1	Q2HZ21_CHLRE	A0A2K3D4W9_CHLRE
cellular_component	GO:0009570	chloroplast stroma	2	20	0.1	0.359335	0.850819	1	1	CLPP_CHLRE	A8IMZ5_CHLRE
cellular_component	GO:0009523	photosystem II	2	40	0.05	0.00372365	0.999355	0.179	1	PSBD_CHLRE	A8I9T6_CHLRE
cellular_component	GO:0005777	peroxisome	2	26	0.0769231	0.196371	0.909346	1	1	A0A2K3D6D8_CHLRE	A0A2K3D311_CHLRE
molecular_function	GO:0010181	FMN binding	2	24	0.0833333	0.325129	0.869976	1	1	A0A2K3D4W9_CHLRE	A0A2K3DHV3_CHLRE
molecular_function	GO:0032549	ribonucleoside binding	2	5	0.4	0.977872	0.147298	1	1	RPOB1_CHLRE	A0A2K3D6S1_CHLRE
molecular_function	GO:0016740	transferase activity	2	44	0.0454545	0.835242	0.183137	1	1	A0A2K3D0H4_CHLRE	A0A2K3DEM5_CHLRE
biological_process	GO:0006366	transcription by RNA polymerase II	2	8	0.25	0.999988	2.55801e-05	1	0.01	RPC1A_CHLRE	A0A2K3CY93_CHLRE
molecular_function	GO:0044183	protein folding chaperone	2	20	0.1	0.452853	0.79326	1	1	A0A2K3DDD4_CHLRE	A0A2K3CTA3_CHLRE
cellular_component	GO:0036064	ciliary basal body	2	23	0.0869565	0.359335	0.850819	1	1	CCD61_CHLRE	A0A2K3E7K9_CHLRE
molecular_function	GO:0015078	proton transmembrane transporter activity	2	13	0.153846	0.530075	0.61059	1	1	A8IDY0_CHLRE	A8JFE2_CHLRE
biological_process	GO:0010190	cytochrome b6f complex assembly	2	3	0.666667	0.997235	0.0536244	1	1	A5H8H9_CHLRE	A5H8I1_CHLRE
cellular_component	GO:0005747	mitochondrial respiratory chain complex I	2	18	0.111111	0.531587	0.737792	1	1	Q6V9B3_CHLRE	A8IHL3_CHLRE
biological_process	GO:0016042	lipid catabolic process	2	10	0.2	0.00475048	0.997748	0.531	1	A0A2K3DMS3_CHLRE	A0A2K3DDY6_CHLRE
biological_process	GO:0042073	intraciliary transport	2	13	0.153846	0.861327	0.306323	1	1	A0A2K3D9P4_CHLRE	H6UI23_CHLRE
cellular_component	GO:0071011	precatalytic spliceosome	2	20	0.1	0.457879	0.789835	1	1	A8HPU4_CHLRE	A8IC90_CHLRE
biological_process	GO:0015995	chlorophyll biosynthetic process	2	17	0.117647	0.659764	0.582355	1	1	A8IMZ5_CHLRE	A8I980_CHLRE
molecular_function	GO:0004521	endoribonuclease activity	2	11	0.181818	0.685767	0.472308	1	1	A0A2K3DEK5_CHLRE	A0A2K3E457_CHLRE
cellular_component	GO:0035869	ciliary transition zone	2	8	0.25	0.904638	0.268113	1	1	A0A2K3CTH6_CHLRE	A0A2K3CYV6_CHLRE
molecular_function	GO:0051087	chaperone binding	2	35	0.0571429	0.112867	0.966542	1	1	A0A2K3CTI6_CHLRE	A0A2K3CTA3_CHLRE
molecular_function	GO:0003713	transcription coactivator activity	2	22	0.0909091	0.673447	0.537063	1	1	A0A2K3CY22_CHLRE	A0A2K3CT32_CHLRE
biological_process	GO:0034765	regulation of ion transmembrane transport	2	11	0.181818	0.851192	0.354122	1	1	B9A0U9_CHLRE	A0A2K3D845_CHLRE
biological_process	GO:0035435	phosphate ion transmembrane transport	2	15	0.133333	0.645878	0.644009	1	1	Q8LP68_CHLRE	A0A2K3CVV6_CHLRE
molecular_function	GO:0004784	superoxide dismutase activity	2	6	0.333333	0.96032	0.201107	1	1	A0A2K3CP36_CHLRE	A8J3M8_CHLRE
molecular_function	GO:0046982	protein heterodimerization activity	2	49	0.0408163	0.0240857	0.994655	0.934	1	A0A2K3D4R7_CHLRE	A0A2K3DSI6_CHLRE
biological_process	GO:0006334	nucleosome assembly	2	36	0.0555556	0.0735124	0.980143	1	1	A0A2K3DBS6_CHLRE	A0A2K3DTZ3_CHLRE
molecular_function	GO:0005507	copper ion binding	2	29	0.0689655	0.205589	0.928972	1	1	A0A2K3DWH7_CHLRE	A0A2K3DZF2_CHLRE
molecular_function	GO:0005198	structural molecule activity	2	14	0.142857	2.41458e-07	1	0	1	A0A2K3CZA0_CHLRE	A8J5T5_CHLRE
cellular_component	GO:0005868	cytoplasmic dynein complex	2	9	0.222222	0.881129	0.363603	1	1	A0A2K3D9P4_CHLRE	H6UI23_CHLRE
molecular_function	GO:0003755	peptidyl-prolyl cis-trans isomerase activity	2	66	0.030303	0.00310076	0.999474	0.265	1	A0A2K3D6N3_CHLRE	A0A2K3D6N9_CHLRE
biological_process	GO:0043161	proteasome-mediated ubiquitin-dependent protein catabolic process	2	66	0.030303	0.000848972	0.999691	0.11	1	A0A2K3E736_CHLRE	A0A2K3CVD3_CHLRE
cellular_component	GO:0110165	cellular anatomical entity	2	13	0.153846	0.726934	0.387068	1	1	A0A2K3DJR2_CHLRE	A0A2K3CXA7_CHLRE
molecular_function	GO:0016018	cyclosporin A binding	2	17	0.117647	0.565676	0.711717	1	1	A0A2K3D6N3_CHLRE	A0A2K3D6N9_CHLRE
biological_process	GO:0000413	protein peptidyl-prolyl isomerization	2	28	0.0714286	0.225465	0.920022	1	1	A0A2K3D6N3_CHLRE	A0A2K3D6N9_CHLRE
biological_process	GO:0006486	protein glycosylation	2	64	0.03125	0.00282217	0.999045	0.359	1	A0A2K3DJA5_CHLRE	A0A2K3D3T2_CHLRE
biological_process	GO:0000470	maturation of LSU-rRNA	2	15	0.133333	0.808981	0.356712	1	1	A8J0V5_CHLRE	A8I645_CHLRE
molecular_function	GO:0051287	NAD binding	2	45	0.0444444	0.0536101	0.983035	0.999	1	A0A2K3CYQ5_CHLRE	A0A2K3D977_CHLRE
biological_process	GO:0042023	DNA endoreduplication	2	3	0.666667	0.997235	0.0536244	1	1	A0A2K3D011_CHLRE	A0A2K3E2J9_CHLRE
molecular_function	GO:0042626	ATPase-coupled transmembrane transporter activity	2	34	0.0588235	0.404361	0.703806	1	1	A0A2K3CQU1_CHLRE	A0A2K3D1B2_CHLRE
biological_process	GO:0007064	mitotic sister chromatid cohesion	2	9	0.222222	0.999977	0.000124736	1	0.053	A0A2K3DFV4_CHLRE	A0A2K3DFQ1_CHLRE
cellular_component	GO:0009534	chloroplast thylakoid	2	10	0.2	0.0190654	0.991879	0.673	1	A0A2K3CYD2_CHLRE	A8IL08_CHLRE
biological_process	GO:0071108	protein K48-linked deubiquitination	2	11	0.181818	0.80724	0.470934	1	1	A0A2K3DZ28_CHLRE	A0A2K3DR81_CHLRE
molecular_function	GO:0000149	SNARE binding	2	23	0.0869565	0.125127	0.962004	1	1	A8I205_CHLRE	A0A2K3D063_CHLRE
biological_process	GO:0006887	exocytosis	2	12	0.166667	0.526148	0.742032	1	1	A0A2K3E4T8_CHLRE	A0A2K3CWJ4_CHLRE
cellular_component	GO:0000776	kinetochore	2	8	0.25	0.795812	0.42961	1	1	A0A2K3DVM6_CHLRE	A0A2K3DI01_CHLRE
biological_process	GO:0006116	NADH oxidation	2	10	0.2	0.844412	0.420357	1	1	A0A2K3DS00_CHLRE	A0A2K3D977_CHLRE
biological_process	GO:0040008	regulation of growth	2	2	1	0.990103	0.0973513	1	1	Q8VZZ5_CHLRE	A0A2K3D3M6_CHLRE
molecular_function	GO:0042162	telomeric DNA binding	2	5	0.4	0.879184	0.367017	1	1	A8ICD8_CHLRE	A0A2K3DTX9_CHLRE
biological_process	GO:0006303	double-strand break repair via nonhomologous end joining	2	11	0.181818	0.80724	0.470934	1	1	A8ICD8_CHLRE	A0A2K3CPZ5_CHLRE
molecular_function	GO:0031491	nucleosome binding	2	7	0.285714	0.943637	0.192478	1	1	A0A2K3DF59_CHLRE	A0A2K3D701_CHLRE
biological_process	GO:0006353	DNA-templated transcription, termination	2	11	0.181818	0.985243	0.0417034	1	1	A0A2K3DNZ3_CHLRE	A8J9F6_CHLRE
biological_process	GO:0072583	clathrin-dependent endocytosis	2	6	0.333333	0.960257	0.201343	1	1	A0A2K3E1E7_CHLRE	A0A2K3D2J3_CHLRE
molecular_function	GO:0005049	nuclear export signal receptor activity	2	7	0.285714	0.937681	0.256622	1	1	A8J2W2_CHLRE	A0A2K3D946_CHLRE
biological_process	GO:0006611	protein export from nucleus	2	6	0.333333	0.960257	0.201343	1	1	A8J2W2_CHLRE	A0A2K3D946_CHLRE
cellular_component	GO:0005669	transcription factor TFIID complex	2	11	0.181818	0.810348	0.46662	1	1	A0A2K3D4R7_CHLRE	A0A2K3CXD2_CHLRE
molecular_function	GO:0008081	phosphoric diester hydrolase activity	2	11	0.181818	0.105189	0.926761	1	1	A0A2K3D4Z3_CHLRE	A0A2K3DU43_CHLRE
cellular_component	GO:0035267	NuA4 histone acetyltransferase complex	2	8	0.25	0.926135	0.228248	1	1	A0A2K3E138_CHLRE	A0A2K3E2I1_CHLRE
biological_process	GO:0000492	box C/D snoRNP assembly	2	5	0.4	0.977836	0.147476	1	1	A0A2K3E7Y1_CHLRE	A0A2K3CQV0_CHLRE
molecular_function	GO:0008878	glucose-1-phosphate adenylyltransferase activity	2	4	0.5	0.990119	0.0972303	1	1	Q9LLL6_CHLRE	A0A2K3DJX2_CHLRE
biological_process	GO:0003341	cilium movement	2	12	0.166667	0.591895	0.64628	1	1	A0A2K3DGG9_CHLRE	Q5XPS1_CHLRE
molecular_function	GO:0019901	protein kinase binding	2	7	0.285714	0.879184	0.367017	1	1	A0A2K3E3F5_CHLRE	A0A2K3D1M9_CHLRE
biological_process	GO:0006518	peptide metabolic process	2	10	0.2	3.54859e-09	1	0	1	A0A2K3CZT0_CHLRE	A0A2K3E673_CHLRE
molecular_function	GO:0004707	MAP kinase activity	2	8	0.25	0.910428	0.312306	1	1	A0A2K3DIC1_CHLRE	A0A2K3D2P4_CHLRE
biological_process	GO:0006633	fatty acid biosynthetic process	2	30	0.0666667	0.139447	0.947079	1	1	A0A2K3E3Y6_CHLRE	A0A2K3DIV9_CHLRE
cellular_component	GO:0070971	endoplasmic reticulum exit site	2	8	0.25	0.911936	0.309218	1	1	A0A2K3E5D5_CHLRE	A8J5T5_CHLRE
molecular_function	GO:0005385	zinc ion transmembrane transporter activity	2	14	0.142857	0.687367	0.604845	1	1	A0A2K3CZZ8_CHLRE	A0A2K3DLK3_CHLRE
biological_process	GO:0071577	zinc ion transmembrane transport	2	14	0.142857	0.68694	0.605357	1	1	A0A2K3CZZ8_CHLRE	A0A2K3DLK3_CHLRE
molecular_function	GO:0015297	antiporter activity	2	54	0.037037	0.0196702	0.993094	0.891	1	A0A2K3E340_CHLRE	A0A2K3E827_CHLRE
cellular_component	GO:0015630	microtubule cytoskeleton	2	12	0.166667	0.999607	0.000735586	1	0.109	A0A2K3DEW9_CHLRE	A0A2K3D295_CHLRE
biological_process	GO:0008299	isoprenoid biosynthetic process	2	8	0.25	0.101229	0.97074	1	1	A8HRQ4_CHLRE	A0A2K3DYD9_CHLRE
cellular_component	GO:0005771	multivesicular body	2	10	0.2	0.847034	0.416262	1	1	A8IRR6_CHLRE	A8IAJ1_CHLRE
biological_process	GO:0030488	tRNA methylation	2	23	0.0869565	0.101229	0.97074	1	1	A0A2K3DSA0_CHLRE	A0A2K3E1W6_CHLRE
molecular_function	GO:0010277	chlorophyllide a oxygenase [overall] activity	2	10	0.2	0.844644	0.419932	1	1	A0A2K3DB48_CHLRE	A0A2K3CQL5_CHLRE
cellular_component	GO:0005802	trans-Golgi network	2	15	0.133333	0.764404	0.468413	1	1	A0A2K3DZQ0_CHLRE	A0A2K3DLV1_CHLRE
molecular_function	GO:0004017	adenylate kinase activity	2	11	0.181818	0.807522	0.470478	1	1	A0A2K3D425_CHLRE	A8HYW3_CHLRE
cellular_component	GO:0042597	periplasmic space	2	4	0.5	0.990315	0.096021	1	1	Q9ATG5_CHLRE	A0A2K3CUG8_CHLRE
molecular_function	GO:0004065	arylsulfatase activity	2	2	1	1	0.0196922	1	1	Q9ATG5_CHLRE	A0A2K3CUG8_CHLRE
biological_process	GO:0018958	phenol-containing compound metabolic process	2	2	1	1	2.85325e-09	1	0	Q9ATG5_CHLRE	A0A2K3CUG8_CHLRE
cellular_component	GO:0005643	nuclear pore	2	21	0.0952381	0.349697	0.812689	1	1	A0A2K3DQA7_CHLRE	A0A2K3D847_CHLRE
biological_process	GO:0007131	reciprocal meiotic recombination	2	13	0.153846	0.693677	0.547766	1	1	A0A2K3E3D8_CHLRE	A0A2K3CXW5_CHLRE
biological_process	GO:0044249	cellular biosynthetic process	2	3	0.666667	0.970781	0.0347891	1	1	A0A2K3DWT4_CHLRE	A0A2K3DB37_CHLRE
biological_process	GO:1901576	organic substance biosynthetic process	2	3	0.666667	0.936244	0.0740233	1	1	A0A2K3DWT4_CHLRE	A0A2K3DB37_CHLRE
molecular_function	GO:0016208	AMP binding	2	4	0.5	0.990119	0.0972303	1	1	A8JCQ8_CHLRE	A0A2K3D1M9_CHLRE
cellular_component	GO:0000118	histone deacetylase complex	2	7	0.285714	0.854222	0.349388	1	1	A0A2K3CUE4_CHLRE	A0A2K3DAW9_CHLRE
biological_process	GO:0044773	mitotic DNA damage checkpoint signaling	2	9	0.222222	0.988588	0.0404379	1	1	A0A2K3DVV1_CHLRE	A0A2K3DBV1_CHLRE
biological_process	GO:0006470	protein dephosphorylation	2	22	0.0909091	0.550882	0.620511	1	1	A0A2K3DTX8_CHLRE	A0A2K3CTY6_CHLRE
molecular_function	GO:0004864	protein phosphatase inhibitor activity	2	4	0.5	0.96032	0.201107	1	1	A0A2K3DTD2_CHLRE	A0A2K3DQD3_CHLRE
biological_process	GO:0007015	actin filament organization	2	5	0.4	0.921477	0.208116	1	1	A0A2K3CTD1_CHLRE	A0A2K3DG07_CHLRE
biological_process	GO:0008360	regulation of cell shape	2	7	0.285714	0.937583	0.256913	1	1	A0A2K3DXX2_CHLRE	A0A2K3DYT3_CHLRE
biological_process	GO:0000244	spliceosomal tri-snRNP complex assembly	2	4	0.5	0.990103	0.0973513	1	1	A8IC90_CHLRE	A0A2K3E5Q8_CHLRE
biological_process	GO:0006816	calcium ion transport	2	7	0.285714	0.993966	0.0147392	1	1	A0A2K3D768_CHLRE	A0A2K3CUI6_CHLRE
biological_process	GO:0006405	RNA export from nucleus	2	11	0.181818	0.844312	0.271475	1	1	A0A2K3D946_CHLRE	A0A2K3DMI1_CHLRE
cellular_component	GO:0034464	BBSome	2	8	0.25	0.911936	0.309218	1	1	A0A2K3CRT2_CHLRE	A0A2K3E7K9_CHLRE
biological_process	GO:0007059	chromosome segregation	2	8	0.25	1	6.1663e-07	1	0	A0A2K3CVM7_CHLRE	A0A2K3D8S5_CHLRE
biological_process	GO:0000079	regulation of cyclin-dependent protein serine/threonine kinase activity	2	13	0.153846	0.727882	0.563601	1	1	A0A2K3E3F5_CHLRE	A0A2K3DH68_CHLRE
molecular_function	GO:0003904	deoxyribodipyrimidine photo-lyase activity	2	4	0.5	0.990119	0.0972303	1	1	A0A2K3D4Y6_CHLRE	A0A2K3D4X9_CHLRE
biological_process	GO:0000719	photoreactive repair	2	7	0.285714	0.937583	0.256913	1	1	A0A2K3D4Y6_CHLRE	A0A2K3D4X9_CHLRE
cellular_component	GO:0005858	axonemal dynein complex	2	4	0.5	0.960685	0.152966	1	1	Q5XPS1_CHLRE	A0A2K3DN16_CHLRE
molecular_function	GO:0030976	thiamine pyrophosphate binding	2	7	0.285714	0.937681	0.256622	1	1	A0A2K3CTE4_CHLRE	A0A2K3E1V3_CHLRE
molecular_function	GO:0030983	mismatched DNA binding	2	13	0.153846	0.687367	0.604845	1	1	A8HM54_CHLRE	A0A2K3DQR5_CHLRE
molecular_function	GO:0000977	RNA polymerase II transcription regulatory region sequence-specific DNA binding	2	7	0.285714	0.997653	0.0059958	1	0.875	A0A2K3E5Y3_CHLRE	A0A2K3D586_CHLRE
molecular_function	GO:0008233	peptidase activity	2	22	0.0909091	0.675677	0.382736	1	1	A0A2K3DLZ5_CHLRE	A8JD49_CHLRE
biological_process	GO:0031145	anaphase-promoting complex-dependent catabolic process	2	10	0.2	0.844412	0.420357	1	1	A0A2K3CVZ5_CHLRE	A0A2K3CZ15_CHLRE
biological_process	GO:0045842	positive regulation of mitotic metaphase/anaphase transition	2	6	0.333333	0.960257	0.201343	1	1	A0A2K3CVZ5_CHLRE	A0A2K3CZ15_CHLRE
cellular_component	GO:0000796	condensin complex	2	5	0.4	0.978295	0.145565	1	1	A0A2K3D0Z9_CHLRE	A0A2K3DFH1_CHLRE
biological_process	GO:0007076	mitotic chromosome condensation	2	8	0.25	0.91029	0.312647	1	1	A0A2K3D9Y5_CHLRE	A0A2K3D0Z9_CHLRE
cellular_component	GO:0005847	mRNA cleavage and polyadenylation specificity factor complex	2	12	0.166667	0.771752	0.514295	1	1	A0A2K3CUY3_CHLRE	A0A2K3E241_CHLRE
molecular_function	GO:0070530	K63-linked polyubiquitin modification-dependent protein binding	2	4	0.5	0.990119	0.0972303	1	1	A0A2K3CSY6_CHLRE	A0A2K3D485_CHLRE
biological_process	GO:0071947	protein deubiquitination involved in ubiquitin-dependent protein catabolic process	2	4	0.5	0.990103	0.0973513	1	1	A0A2K3CSY6_CHLRE	A0A2K3D485_CHLRE
cellular_component	GO:0000148	1,3-beta-D-glucan synthase complex	2	7	0.285714	0.938776	0.25393	1	1	A0A2K3DXX2_CHLRE	A0A2K3DYT3_CHLRE
molecular_function	GO:0003843	1,3-beta-D-glucan synthase activity	2	7	0.285714	0.937681	0.256622	1	1	A0A2K3DXX2_CHLRE	A0A2K3DYT3_CHLRE
molecular_function	GO:0046527	glucosyltransferase activity	2	7	0.285714	0.731532	0.473784	1	1	A0A2K3DXX2_CHLRE	A0A2K3DYT3_CHLRE
biological_process	GO:0006075	(1->3)-beta-D-glucan biosynthetic process	2	7	0.285714	0.937583	0.256913	1	1	A0A2K3DXX2_CHLRE	A0A2K3DYT3_CHLRE
biological_process	GO:0071704	organic substance metabolic process	2	14	0.142857	0.369812	0.659008	1	1	A0A2K3DY27_CHLRE	A0A2K3E236_CHLRE
biological_process	GO:0010032	meiotic chromosome condensation	2	4	0.5	0.990103	0.0973513	1	1	A0A2K3D9Y5_CHLRE	A0A2K3DFH1_CHLRE
biological_process	GO:0016075	rRNA catabolic process	2	13	0.153846	0.526148	0.742032	1	1	A0A2K3DKX2_CHLRE	A0A2K3CP42_CHLRE
cellular_component	GO:0005770	late endosome	2	5	0.4	0.764209	0.435369	1	1	A0A2K3D1G5_CHLRE	A0A2K3DQL6_CHLRE
molecular_function	GO:0017108	5'-flap endonuclease activity	2	10	0.2	0.844644	0.419932	1	1	A0A2K3D4L9_CHLRE	A0A2K3DLI8_CHLRE
biological_process	GO:0007162	negative regulation of cell adhesion	2	3	0.666667	0.997235	0.0536244	1	1	A0A2K3CZE5_CHLRE	A0A2K3DA98_CHLRE
biological_process	GO:0052746	inositol phosphorylation	2	6	0.333333	0.960257	0.201343	1	1	A0A2K3DUV4_CHLRE	A0A2K3DXV5_CHLRE
molecular_function	GO:0019829	ATPase-coupled cation transmembrane transporter activity	2	10	0.2	0.882596	0.237957	1	1	A0A2K3E1F5_CHLRE	A0A2K3E1F7_CHLRE
cellular_component	GO:0034991	nuclear meiotic cohesin complex	2	4	0.5	0.990315	0.096021	1	1	A0A2K3DFV4_CHLRE	A0A2K3DFQ1_CHLRE
cellular_component	GO:0034990	nuclear mitotic cohesin complex	2	5	0.4	0.978295	0.145565	1	1	A0A2K3DFV4_CHLRE	A0A2K3DFQ1_CHLRE
cellular_component	GO:0000795	synaptonemal complex	2	4	0.5	0.990315	0.096021	1	1	A0A2K3DFV4_CHLRE	A0A2K3DFQ1_CHLRE
biological_process	GO:0007130	synaptonemal complex assembly	2	4	0.5	0.990103	0.0973513	1	1	A0A2K3DFV4_CHLRE	A0A2K3DFQ1_CHLRE
biological_process	GO:0071932	replication fork reversal	2	4	0.5	0.990103	0.0973513	1	1	A0A2K3D4L9_CHLRE	A0A2K3DZT7_CHLRE
biological_process	GO:0031087	deadenylation-independent decapping of nuclear-transcribed mRNA	2	3	0.666667	0.997235	0.0536244	1	1	A0A2K3D603_CHLRE	A0A2K3D608_CHLRE
molecular_function	GO:0004525	ribonuclease III activity	2	10	0.2	0.844644	0.419932	1	1	A0A2K3DKX2_CHLRE	A0A2K3CP42_CHLRE
molecular_function	GO:0070182	DNA polymerase binding	2	5	0.4	0.977872	0.147298	1	1	A0A2K3DIM2_CHLRE	A0A2K3E158_CHLRE
molecular_function	GO:0032454	histone H3-methyl-lysine-9 demethylase activity	2	5	0.4	0.977872	0.147298	1	1	A0A2K3CUE4_CHLRE	A0A2K3DAW9_CHLRE
biological_process	GO:0033169	histone H3-K9 demethylation	2	3	0.666667	0.997235	0.0536244	1	1	A0A2K3CUE4_CHLRE	A0A2K3DAW9_CHLRE
biological_process	GO:0030705	cytoskeleton-dependent intracellular transport	2	6	0.333333	0.985243	0.0417034	1	1	A0A2K3E5K1_CHLRE	A0A2K3DZP9_CHLRE
cellular_component	GO:0030014	CCR4-NOT complex	2	8	0.25	0.992001	0.0352178	1	1	A0A2K3DHQ0_CHLRE	A0A2K3D7N1_CHLRE
cellular_component	GO:0008622	epsilon DNA polymerase complex	2	3	0.666667	0.997297	0.0528529	1	1	A0A2K3DXP3_CHLRE	A0A2K3D9E2_CHLRE
biological_process	GO:0015693	magnesium ion transport	2	9	0.222222	0.879	0.367403	1	1	A0A2K3DQB3_CHLRE	A0A2K3E6W7_CHLRE
cellular_component	GO:0072686	mitotic spindle	2	8	0.25	0.983329	0.0606915	1	1	A0A2K3CVM7_CHLRE	A0A2K3E6M0_CHLRE
biological_process	GO:0031047	gene silencing by RNA	2	8	0.25	0.68694	0.605357	1	1	A0A2K3DKX2_CHLRE	A0A2K3DYZ3_CHLRE
molecular_function	GO:0016747	acyltransferase activity, transferring groups other than amino-acyl groups	2	12	0.166667	0.151679	0.898287	1	1	A0A2K3D6M4_CHLRE	A0A2K3DIV9_CHLRE
molecular_function	GO:0016985	mannan endo-1,4-beta-mannosidase activity	2	6	0.333333	0.96032	0.201107	1	1	A0A2K3E236_CHLRE	A0A2K3E452_CHLRE
cellular_component	GO:0043596	nuclear replication fork	2	4	0.5	0.731961	0.505983	1	1	A0A2K3D1T7_CHLRE	A0A2K3DSU7_CHLRE
cellular_component	GO:0030897	HOPS complex	2	6	0.333333	0.961047	0.198871	1	1	A0A2K3D1G5_CHLRE	A0A2K3DQL6_CHLRE
biological_process	GO:0051017	actin filament bundle assembly	2	3	0.666667	0.997235	0.0536244	1	1	A0A2K3DLJ0_CHLRE	A0A2K3DVB8_CHLRE
cellular_component	GO:0016459	myosin complex	2	4	0.5	0.990315	0.096021	1	1	A0A2K3CTD1_CHLRE	A0A2K3DG07_CHLRE
molecular_function	GO:0000146	microfilament motor activity	2	3	0.666667	0.99724	0.0535559	1	1	A0A2K3CTD1_CHLRE	A0A2K3DG07_CHLRE
biological_process	GO:0030050	vesicle transport along actin filament	2	3	0.666667	0.997235	0.0536244	1	1	A0A2K3CTD1_CHLRE	A0A2K3DG07_CHLRE
biological_process	GO:0000466	maturation of 5.8S rRNA from tricistronic rRNA transcript (SSU-rRNA, 5.8S rRNA, LSU-rRNA)	2	6	0.333333	0.35372	0.854151	1	1	A0A2K3D8Y8_CHLRE	A0A2K3CPH6_CHLRE
molecular_function	GO:0015112	nitrate transmembrane transporter activity	2	6	0.333333	0.924553	0.231489	1	1	A0A2K3DD68_CHLRE	A0A2K3DVM4_CHLRE
biological_process	GO:0009607	response to biotic stimulus	2	7	0.285714	0.186076	0.937521	1	1	A0A2K3D395_CHLRE	A0A2K3E7R1_CHLRE
molecular_function	GO:0015276	ligand-gated ion channel activity	2	5	0.4	0.768511	0.518276	1	1	A0A2K3D6T2_CHLRE	A0A2K3D6T5_CHLRE
biological_process	GO:0072318	clathrin coat disassembly	2	2	1	1	0.019718	1	1	A0A2K3E1E7_CHLRE	A0A2K3D2J3_CHLRE
biological_process	GO:0000012	single strand break repair	2	2	1	1	0.019718	1	1	A0A2K3DQR5_CHLRE	A0A2K3E874_CHLRE
biological_process	GO:0006879	cellular iron ion homeostasis	2	7	0.285714	0.902503	0.272118	1	1	A0A2K3CQU1_CHLRE	A0A2K3D1B2_CHLRE
biological_process	GO:0032502	developmental process	2	4	0.5	0.433897	0.722873	1	1	A0A2K3DNY8_CHLRE	A0A2K3DNZ3_CHLRE
biological_process	GO:0009314	response to radiation	2	5	0.4	0.0824861	0.964824	1	1	A0A2K3DKD8_CHLRE	A0A2K3D4A8_CHLRE
molecular_function	GO:0004500	dopamine beta-monooxygenase activity	2	9	0.222222	0.879184	0.367017	1	1	A0A2K3DZF2_CHLRE	A0A2K3DJ96_CHLRE
molecular_function	GO:0000095	S-adenosyl-L-methionine transmembrane transporter activity	2	6	0.333333	0.96032	0.201107	1	1	A0A2K3DG93_CHLRE	A0A2K3CUM3_CHLRE
biological_process	GO:0034058	endosomal vesicle fusion	2	5	0.4	0.977836	0.147476	1	1	A0A2K3D1G5_CHLRE	A0A2K3DQL6_CHLRE
biological_process	GO:0016926	protein desumoylation	2	5	0.4	0.977836	0.147476	1	1	A0A2K3E4F7_CHLRE	A0A2K3CZ29_CHLRE
cellular_component	GO:0097014	ciliary plasm	2	2	1	0.99069	0.0208489	1	0.993	A0A2K3D9P4_CHLRE	H6UI23_CHLRE
cellular_component	GO:0036464	cytoplasmic ribonucleoprotein granule	2	3	0.666667	0.813277	0.33446	1	1	A0A2K3DEK5_CHLRE	A0A2K3E457_CHLRE
biological_process	GO:0090502	RNA phosphodiester bond hydrolysis, endonucleolytic	2	5	0.4	0.76005	0.473852	1	1	A0A2K3DEK5_CHLRE	A0A2K3E457_CHLRE
molecular_function	GO:0070840	dynein complex binding	2	6	0.333333	0.96032	0.201107	1	1	A0A2K3DDL5_CHLRE	A0A2K3CUD8_CHLRE
cellular_component	GO:0033186	CAF-1 complex	2	6	0.333333	0.961047	0.198871	1	1	A0A2K3DBS6_CHLRE	A0A2K3DTZ3_CHLRE
molecular_function	GO:0004420	hydroxymethylglutaryl-CoA reductase (NADPH) activity	2	3	0.666667	0.99724	0.0535559	1	1	A0A2K3DHR8_CHLRE	A0A2K3DGP4_CHLRE
biological_process	GO:0015936	coenzyme A metabolic process	2	3	0.666667	0.943538	0.19276	1	1	A0A2K3DHR8_CHLRE	A0A2K3DGP4_CHLRE
molecular_function	GO:0052689	carboxylic ester hydrolase activity	2	5	0.4	0.752949	0.370058	1	1	A0A2K3DWL6_CHLRE	A0A2K3E4S1_CHLRE
molecular_function	GO:0034647	histone H3-tri/di/monomethyl-lysine-4 demethylase activity	2	2	1	1	0.0196922	1	1	A0A2K3D3P2_CHLRE	A0A2K3DX10_CHLRE
biological_process	GO:0060255	regulation of macromolecule metabolic process	2	3	0.666667	1	7.52002e-09	1	0	A0A2K3D3P2_CHLRE	A0A2K3DX10_CHLRE
biological_process	GO:0007091	metaphase/anaphase transition of mitotic cell cycle	2	4	0.5	0.902503	0.272118	1	1	A0A2K3CVZ5_CHLRE	A0A2K3CZ15_CHLRE
molecular_function	GO:0030374	nuclear receptor coactivator activity	2	5	0.4	0.977872	0.147298	1	1	A0A2K3CSK2_CHLRE	A0A2K3DV23_CHLRE
biological_process	GO:0009755	hormone-mediated signaling pathway	2	2	1	0.727207	0.51155	1	1	A0A2K3DN94_CHLRE	A0A2K3CRH9_CHLRE
biological_process	GO:1901673	regulation of mitotic spindle assembly	2	2	1	1	0.019718	1	1	A0A2K3DWL0_CHLRE	A0A2K3DWK7_CHLRE
biological_process	GO:0051276	chromosome organization	2	2	1	0.999356	0.00108778	1	0.376	A0A2K3DQG4_CHLRE	A0A2K3E2J9_CHLRE
molecular_function	GO:0003730	mRNA 3'-UTR binding	2	3	0.666667	0.99724	0.0535559	1	1	A0A2K3DWP4_CHLRE	A0A2K3DE16_CHLRE
biological_process	GO:0051493	regulation of cytoskeleton organization	2	4	0.5	0.852241	0.297806	1	1	A0A2K3CU18_CHLRE	A0A2K3D8Z6_CHLRE
cellular_component	GO:0034066	Ric1-Rgp1 guanyl-nucleotide exchange factor complex	2	3	0.666667	0.997297	0.0528529	1	1	A0A2K3D2X0_CHLRE	A0A2K3D2W4_CHLRE
biological_process	GO:0018298	protein-chromophore linkage	1	36	0.0277778	0.0292599	0.995773	0.997	1	PSBD_CHLRE
biological_process	GO:0015979	photosynthesis	1	61	0.0163934	0.000107593	0.999979	0.015	1	A8IMZ5_CHLRE
molecular_function	GO:0070180	large ribosomal subunit rRNA binding	1	7	0.142857	0.743378	0.65329	1	1	A8J5Z0_CHLRE
cellular_component	GO:0005763	mitochondrial small ribosomal subunit	1	16	0.0625	0.324874	0.909691	1	1	RR2A_CHLRE
molecular_function	GO:0043531	ADP binding	1	5	0.2	0.852702	0.530704	1	1	ATPA_CHLRE
molecular_function	GO:0016730	oxidoreductase activity, acting on iron-sulfur proteins as donors	1	5	0.2	0.743378	0.65329	1	1	CHLB_CHLRE
molecular_function	GO:0016636	oxidoreductase activity, acting on the CH-CH group of donors, iron-sulfur protein as acceptor	1	4	0.25	0.90277	0.454023	1	1	CHLB_CHLRE
biological_process	GO:0036068	light-independent chlorophyll biosynthetic process	1	3	0.333333	0.946376	0.365075	1	1	CHLB_CHLRE
biological_process	GO:0019685	photosynthesis, dark reaction	1	3	0.333333	0.743087	0.653638	1	1	CHLB_CHLRE
biological_process	GO:0010027	thylakoid membrane organization	1	10	0.1	0.579643	0.780205	1	1	A0A2K3CQW3_CHLRE
molecular_function	GO:0016168	chlorophyll binding	1	32	0.03125	0.0489052	0.992173	0.999	1	PSBD_CHLRE
molecular_function	GO:0045156	electron transporter, transferring electrons within the cyclic electron transport pathway of photosynthesis activity	1	6	0.166667	0.798893	0.596623	1	1	PSBD_CHLRE
molecular_function	GO:0010242	oxygen evolving activity	1	3	0.333333	0.946444	0.364825	1	1	PSBD_CHLRE
biological_process	GO:0009772	photosynthetic electron transport in photosystem II	1	5	0.2	0.852524	0.531026	1	1	PSBD_CHLRE
cellular_component	GO:0022625	cytosolic large ribosomal subunit	1	51	0.0196078	0.00429664	0.999539	0.226	1	A8J5Z0_CHLRE
biological_process	GO:0000462	maturation of SSU-rRNA from tricistronic rRNA transcript (SSU-rRNA, 5.8S rRNA, LSU-rRNA)	1	22	0.0454545	0.0707184	0.987732	1	1	A0A2K3DLF9_CHLRE
biological_process	GO:0002181	cytoplasmic translation	1	23	0.0434783	0.0976793	0.960855	1	1	A8J5Z0_CHLRE
cellular_component	GO:0005665	RNA polymerase II, core complex	1	13	0.0769231	0.440945	0.858192	1	1	RPC1A_CHLRE
cellular_component	GO:0022627	cytosolic small ribosomal subunit	1	33	0.030303	0.044455	0.993021	0.956	1	RR3_CHLRE
biological_process	GO:0061077	chaperone-mediated protein folding	1	16	0.0625	0.149558	0.934958	1	1	A0A2K3CTA3_CHLRE
molecular_function	GO:0051213	dioxygenase activity	1	10	0.1	0.00508698	0.999087	0.405	1	A0A2K3DVE4_CHLRE
biological_process	GO:0006211	5-methylcytosine catabolic process	1	2	0.5	0.980282	0.261258	1	1	A0A2K3DS01_CHLRE
molecular_function	GO:0016671	oxidoreductase activity, acting on a sulfur group of donors, disulfide as acceptor	1	12	0.0833333	0.146282	0.969317	1	1	A0A2K3DPS9_CHLRE
cellular_component	GO:0030992	intraciliary transport particle B	1	13	0.0769231	0.440945	0.858192	1	1	A0A2K3E6H6_CHLRE
biological_process	GO:0060285	cilium-dependent cell motility	1	9	0.111111	0.565132	0.712234	1	1	A0A2K3DN16_CHLRE
cellular_component	GO:0046540	U4/U6 x U5 tri-snRNP complex	1	19	0.0526316	0.234936	0.942498	1	1	A8IC90_CHLRE
cellular_component	GO:0005682	U5 snRNP	1	11	0.0909091	0.53338	0.808441	1	1	A0A2K3E5Q8_CHLRE
molecular_function	GO:0004550	nucleoside diphosphate kinase activity	1	7	0.142857	0.743378	0.65329	1	1	A0A2K3DYD5_CHLRE
molecular_function	GO:0016851	magnesium chelatase activity	1	5	0.2	0.852702	0.530704	1	1	A8IMZ5_CHLRE
cellular_component	GO:1990112	RQC complex	1	4	0.25	0.903979	0.451547	1	1	A0A2K3DM03_CHLRE
molecular_function	GO:0043023	ribosomal large subunit binding	1	14	0.0714286	0.395155	0.879907	1	1	A0A2K3DM03_CHLRE
biological_process	GO:0072344	rescue of stalled ribosome	1	6	0.166667	0.798657	0.596963	1	1	A0A2K3DM03_CHLRE
biological_process	GO:1990116	ribosome-associated ubiquitin-dependent protein catabolic process	1	2	0.5	0.980282	0.261258	1	1	A0A2K3DM03_CHLRE
biological_process	GO:0009089	lysine biosynthetic process via diaminopimelate	1	9	0.111111	0.632597	0.74422	1	1	A0A2K3DBP3_CHLRE
biological_process	GO:0016226	iron-sulfur cluster assembly	1	21	0.047619	0.145849	0.969452	1	1	A8JHB2_CHLRE
cellular_component	GO:0000407	phagophore assembly site	1	8	0.125	0.960837	0.113938	1	1	A0A2K3DFH4_CHLRE
biological_process	GO:0060623	regulation of chromosome condensation	1	1	1	1	0.140488	1	1	A0A2K3DFC7_CHLRE
biological_process	GO:0071922	regulation of cohesin loading	1	1	1	1	0.140488	1	1	A0A2K3DFC7_CHLRE
biological_process	GO:0030150	protein import into mitochondrial matrix	1	19	0.0526316	0.230853	0.94391	1	1	A0A2K3CTI6_CHLRE
cellular_component	GO:0008076	voltage-gated potassium channel complex	1	4	0.25	0.903979	0.451547	1	1	A0A2K3D845_CHLRE
biological_process	GO:1902600	proton transmembrane transport	1	9	0.111111	0.402988	0.795018	1	1	A0A2K3DG90_CHLRE
biological_process	GO:0051453	regulation of intracellular pH	1	10	0.1	0.645878	0.644009	1	1	A0A2K3DSM2_CHLRE
cellular_component	GO:0016592	mediator complex	1	17	0.0588235	0.292139	0.922305	1	1	A0A2K3D6P5_CHLRE
cellular_component	GO:0005839	proteasome core complex	1	16	0.0625	0.292139	0.922305	1	1	A0A2K3DR83_CHLRE
cellular_component	GO:0019773	proteasome core complex, alpha-subunit complex	1	8	0.125	0.690782	0.699295	1	1	A0A2K3DR83_CHLRE
biological_process	GO:0010498	proteasomal protein catabolic process	1	15	0.0666667	0.000401722	0.999855	0.054	1	A0A2K3DR83_CHLRE
cellular_component	GO:0000786	nucleosome	1	39	0.025641	0.0207551	0.997177	0.715	1	A0A2K3DSI6_CHLRE
cellular_component	GO:0031080	nuclear pore outer ring	1	6	0.166667	0.801129	0.593877	1	1	A0A2K3D472_CHLRE
molecular_function	GO:0015513	high-affinity secondary active nitrite transmembrane transporter activity	1	6	0.166667	0.798893	0.596623	1	1	A0A2K3DTF1_CHLRE
biological_process	GO:0015707	nitrite transport	1	6	0.166667	0.798657	0.596963	1	1	A0A2K3DTF1_CHLRE
biological_process	GO:0006782	protoporphyrinogen IX biosynthetic process	1	12	0.0833333	0.481243	0.837711	1	1	A8I980_CHLRE
molecular_function	GO:0008137	NADH dehydrogenase (ubiquinone) activity	1	8	0.125	0.687694	0.702002	1	1	A8IHL3_CHLRE
molecular_function	GO:0031625	ubiquitin protein ligase binding	1	31	0.0322581	0.0554255	0.990889	0.999	1	A0A2K3DBV0_CHLRE
biological_process	GO:0009909	regulation of flower development	1	5	0.2	0.852524	0.531026	1	1	A0A2K3DLC1_CHLRE
cellular_component	GO:0030131	clathrin adaptor complex	1	6	0.166667	0.583738	0.777367	1	1	A8HXA2_CHLRE
biological_process	GO:0008610	lipid biosynthetic process	1	10	0.1	3.21988e-06	0.999999	0	1	A0A2K3DBH6_CHLRE
biological_process	GO:0090630	activation of GTPase activity	1	12	0.0833333	0.481243	0.837711	1	1	A0A2K3DYN3_CHLRE
biological_process	GO:0006875	cellular metal ion homeostasis	1	2	0.5	0.977761	0.0436583	1	1	A8IVB2_CHLRE
cellular_component	GO:0005832	chaperonin-containing T-complex	1	8	0.125	0.690782	0.699295	1	1	A0A2K3DSK9_CHLRE
molecular_function	GO:0019899	enzyme binding	1	1	1	0.880983	0.171607	1	1	A8I5N5_CHLRE
molecular_function	GO:0046906	tetrapyrrole binding	1	1	1	0.000636904	0.999807	0.057	1	A8I5N5_CHLRE
biological_process	GO:0010019	chloroplast-nucleus signaling pathway	1	1	1	1	0.140488	1	1	A8I5N5_CHLRE
molecular_function	GO:0047627	adenylylsulfatase activity	1	6	0.166667	0.798893	0.596623	1	1	A0A2K3DQR5_CHLRE
biological_process	GO:0006090	pyruvate metabolic process	1	10	0.1	0.0591017	0.984706	1	1	A0A2K3CR97_CHLRE
cellular_component	GO:0005666	RNA polymerase III complex	1	16	0.0625	0.324874	0.909691	1	1	A0A2K3D6S1_CHLRE
molecular_function	GO:0030170	pyridoxal phosphate binding	1	47	0.0212766	0.00698151	0.9992	0.525	1	A0A2K3D4F5_CHLRE
cellular_component	GO:0010005	cortical microtubule, transverse to long axis	1	3	0.333333	0.947147	0.362666	1	1	A0A2K3D7C1_CHLRE
cellular_component	GO:0000307	cyclin-dependent protein kinase holoenzyme complex	1	17	0.0588235	0.234936	0.942498	1	1	A0A2K3DH68_CHLRE
cellular_component	GO:0005687	U4 snRNP	1	6	0.166667	0.801129	0.593877	1	1	A8IC90_CHLRE
biological_process	GO:0006096	glycolytic process	1	24	0.0416667	0.12961	0.97376	1	1	A0A2K3DST4_CHLRE
cellular_component	GO:0005778	peroxisomal membrane	1	15	0.0666667	0.262208	0.933159	1	1	A0A2K3CV78_CHLRE
cellular_component	GO:0031305	integral component of mitochondrial inner membrane	1	12	0.0833333	0.854222	0.349388	1	1	A0A2K3DG90_CHLRE
molecular_function	GO:0032977	membrane insertase activity	1	6	0.166667	0.798893	0.596623	1	1	A0A2K3CQW3_CHLRE
biological_process	GO:0051205	protein insertion into membrane	1	5	0.2	0.184003	0.958605	1	1	A0A2K3CQW3_CHLRE
cellular_component	GO:0008540	proteasome regulatory particle, base subcomplex	1	11	0.0909091	0.53338	0.808441	1	1	A0A2K3CVD3_CHLRE
molecular_function	GO:0036402	proteasome-activating activity	1	8	0.125	0.687694	0.702002	1	1	A0A2K3CVD3_CHLRE
biological_process	GO:0000460	maturation of 5.8S rRNA	1	10	0.1	0.299231	0.861976	1	1	A8J0V5_CHLRE
cellular_component	GO:0016471	vacuolar proton-transporting V-type ATPase complex	1	5	0.2	0.938776	0.25393	1	1	A8IDY0_CHLRE
cellular_component	GO:0089701	U2AF complex	1	4	0.25	0.903979	0.451547	1	1	A0A2K3E1C6_CHLRE
molecular_function	GO:0030628	pre-mRNA 3'-splice site binding	1	5	0.2	0.852702	0.530704	1	1	A0A2K3E1C6_CHLRE
biological_process	GO:0006783	heme biosynthetic process	1	9	0.111111	0.417645	0.815997	1	1	A8I980_CHLRE
cellular_component	GO:0031390	Ctf18 RFC-like complex	1	2	0.5	0.98058	0.259395	1	1	A0A2K3CW19_CHLRE
cellular_component	GO:0030686	90S preribosome	1	10	0.1	0.302474	0.882017	1	1	A8I645_CHLRE
biological_process	GO:0000056	ribosomal small subunit export from nucleus	1	4	0.25	0.902649	0.454316	1	1	A8J2W2_CHLRE
biological_process	GO:0006120	mitochondrial electron transport, NADH to ubiquinone	1	8	0.125	0.687353	0.702351	1	1	Q6V9B3_CHLRE
biological_process	GO:0009734	auxin-activated signaling pathway	1	8	0.125	0.632597	0.74422	1	1	A0A2K3CPJ7_CHLRE
biological_process	GO:0034599	cellular response to oxidative stress	1	28	0.0357143	0.112381	0.966742	1	1	A0A2K3CQW5_CHLRE
molecular_function	GO:0004520	endodeoxyribonuclease activity	1	1	1	0.937755	0.177324	1	1	A0A0U2Q5E3_CHLRE
biological_process	GO:0006295	nucleotide-excision repair, DNA incision, 3'-to lesion	1	1	1	1	0.140488	1	1	A0A0U2Q5E3_CHLRE
biological_process	GO:0009088	threonine biosynthetic process	1	5	0.2	0.852524	0.531026	1	1	A0A2K3DBP3_CHLRE
cellular_component	GO:0012505	endomembrane system	1	26	0.0384615	5.43539e-11	1	0	1	A8I205_CHLRE
cellular_component	GO:0031201	SNARE complex	1	23	0.0434783	0.149181	0.96851	1	1	A8I205_CHLRE
molecular_function	GO:0005484	SNAP receptor activity	1	21	0.047619	0.184473	0.958442	1	1	A8I205_CHLRE
biological_process	GO:0006906	vesicle fusion	1	15	0.0666667	0.702194	0.506573	1	1	A8I205_CHLRE
cellular_component	GO:0009331	glycerol-3-phosphate dehydrogenase complex	1	7	0.142857	0.74607	0.650535	1	1	A0A2K3D977_CHLRE
molecular_function	GO:0004367	glycerol-3-phosphate dehydrogenase [NAD+] activity	1	6	0.166667	0.798893	0.596623	1	1	A0A2K3D977_CHLRE
biological_process	GO:0046168	glycerol-3-phosphate catabolic process	1	6	0.166667	0.798657	0.596963	1	1	A0A2K3D977_CHLRE
biological_process	GO:0006072	glycerol-3-phosphate metabolic process	1	6	0.166667	0.687353	0.702351	1	1	A0A2K3D977_CHLRE
cellular_component	GO:0030127	COPII vesicle coat	1	8	0.125	0.690782	0.699295	1	1	A8J5T5_CHLRE
biological_process	GO:0007005	mitochondrion organization	1	9	0.111111	0.0848903	0.957024	1	1	A0A2K3DVN1_CHLRE
biological_process	GO:0007035	vacuolar acidification	1	5	0.2	0.852524	0.531026	1	1	A8IDY0_CHLRE
molecular_function	GO:0003688	DNA replication origin binding	1	10	0.1	0.580068	0.779869	1	1	A0A2K3E6D5_CHLRE
molecular_function	GO:0060090	molecular adaptor activity	1	7	0.142857	0.0877607	0.969675	1	1	A0A2K3CYY3_CHLRE
cellular_component	GO:0018444	translation release factor complex	1	2	0.5	0.98058	0.259395	1	1	Q8VZZ5_CHLRE
molecular_function	GO:1990825	sequence-specific mRNA binding	1	1	1	1	0.14038	1	1	Q8VZZ5_CHLRE
molecular_function	GO:0016149	translation release factor activity, codon specific	1	3	0.333333	0.946444	0.364825	1	1	Q8VZZ5_CHLRE
biological_process	GO:0002184	cytoplasmic translational termination	1	2	0.5	0.980282	0.261258	1	1	Q8VZZ5_CHLRE
molecular_function	GO:0004144	diacylglycerol O-acyltransferase activity	1	9	0.111111	0.632983	0.743875	1	1	A0A2K3DGW3_CHLRE
biological_process	GO:0006301	postreplication repair	1	6	0.166667	0.994324	0.0235748	1	1	A0A2K3E231_CHLRE
cellular_component	GO:0016607	nuclear speck	1	14	0.0714286	0.399213	0.877993	1	1	A0A2K3E1C6_CHLRE
biological_process	GO:0006272	leading strand elongation	1	4	0.25	0.902649	0.454316	1	1	A0A2K3DXP3_CHLRE
biological_process	GO:0006298	mismatch repair	1	16	0.0625	0.257968	0.934712	1	1	A8HM54_CHLRE
biological_process	GO:0006275	regulation of DNA replication	1	2	0.5	0.992611	0.0402934	1	1	A0A2K3D6T3_CHLRE
biological_process	GO:0019985	translesion synthesis	1	3	0.333333	0.998142	0.0119981	1	0.999	A0A2K3D744_CHLRE
molecular_function	GO:0004089	carbonate dehydratase activity	1	9	0.111111	0.632983	0.743875	1	1	A0A2K3DSC4_CHLRE
cellular_component	GO:0097526	spliceosomal tri-snRNP complex	1	6	0.166667	0.132742	0.972912	1	1	A8IC90_CHLRE
molecular_function	GO:0017070	U6 snRNA binding	1	7	0.142857	0.743378	0.65329	1	1	A0A2K3E5Q8_CHLRE
biological_process	GO:0006612	protein targeting to membrane	1	13	0.0769231	0.0257271	0.99637	0.994	1	A0A2K3E4T8_CHLRE
biological_process	GO:0051131	chaperone-mediated protein complex assembly	1	5	0.2	0.852524	0.531026	1	1	A0A2K3E0Q7_CHLRE
molecular_function	GO:0071568	UFM1 transferase activity	1	2	0.5	0.980308	0.261068	1	1	A0A2K3CUP4_CHLRE
biological_process	GO:1990592	protein K69-linked ufmylation	1	2	0.5	0.980282	0.261258	1	1	A0A2K3CUP4_CHLRE
molecular_function	GO:0031072	heat shock protein binding	1	12	0.0833333	0.112867	0.966542	1	1	A0A2K3DDD4_CHLRE
cellular_component	GO:0030126	COPI vesicle coat	1	9	0.111111	0.636397	0.741256	1	1	A0A2K3CZA0_CHLRE
biological_process	GO:0006890	retrograde vesicle-mediated transport, Golgi to endoplasmic reticulum	1	17	0.0588235	0.287766	0.924008	1	1	A0A2K3CZA0_CHLRE
cellular_component	GO:0032040	small-subunit processome	1	35	0.0285714	0.0345688	0.994838	0.899	1	A0A2K3CZX9_CHLRE
biological_process	GO:0017148	negative regulation of translation	1	9	0.111111	0.742982	0.421179	1	1	A0A2K3DHQ0_CHLRE
cellular_component	GO:0030991	intraciliary transport particle A	1	5	0.2	0.854435	0.528043	1	1	A9XPA7_CHLRE
biological_process	GO:0035721	intraciliary retrograde transport	1	5	0.2	0.852524	0.531026	1	1	A9XPA7_CHLRE
biological_process	GO:0061512	protein localization to cilium	1	6	0.166667	0.972868	0.121	1	1	A0A2K3CRT2_CHLRE
cellular_component	GO:0043564	Ku70:Ku80 complex	1	2	0.5	0.98058	0.259395	1	1	A8ICD8_CHLRE
biological_process	GO:0071480	cellular response to gamma radiation	1	2	0.5	0.980282	0.261258	1	1	A8ICD8_CHLRE
biological_process	GO:0071481	cellular response to X-ray	1	2	0.5	0.980282	0.261258	1	1	A8ICD8_CHLRE
biological_process	GO:0046855	inositol phosphate dephosphorylation	1	9	0.111111	0.632597	0.74422	1	1	A0A2K3CZ37_CHLRE
molecular_function	GO:0051500	D-tyrosyl-tRNA(Tyr) deacylase activity	1	1	1	1	0.14038	1	1	A8IXY0_CHLRE
biological_process	GO:0006399	tRNA metabolic process	1	1	1	0.000637436	0.999772	0.081	1	A8IXY0_CHLRE
cellular_component	GO:0071004	U2-type prespliceosome	1	14	0.0714286	0.399213	0.877993	1	1	A0A2K3E1C6_CHLRE
cellular_component	GO:0005881	cytoplasmic microtubule	1	4	0.25	0.997678	0.0117833	1	0.879	A8J7M5_CHLRE
biological_process	GO:0051568	histone H3-K4 methylation	1	8	0.125	0.632597	0.74422	1	1	A0A2K3CP13_CHLRE
molecular_function	GO:0004364	glutathione transferase activity	1	17	0.0588235	0.288283	0.923783	1	1	A8HUC9_CHLRE
biological_process	GO:0006749	glutathione metabolic process	1	20	0.05	0.115049	0.97746	1	1	A8HUC9_CHLRE
biological_process	GO:0006488	dolichol-linked oligosaccharide biosynthetic process	1	8	0.125	0.687353	0.702351	1	1	A0A2K3E7F7_CHLRE
cellular_component	GO:0030176	integral component of endoplasmic reticulum membrane	1	28	0.0357143	0.0441636	0.989155	0.955	1	A0A2K3DLV1_CHLRE
biological_process	GO:0006002	fructose 6-phosphate metabolic process	1	7	0.142857	0.743087	0.653638	1	1	A0A2K3DHP2_CHLRE
molecular_function	GO:0000293	ferric-chelate reductase activity	1	2	0.5	0.946444	0.364825	1	1	A2I2U7_CHLRE
biological_process	GO:0033215	reductive iron assimilation	1	2	0.5	0.980282	0.261258	1	1	A2I2U7_CHLRE
molecular_function	GO:0004655	porphobilinogen synthase activity	1	1	1	1	0.14038	1	1	A8I980_CHLRE
molecular_function	GO:0042803	protein homodimerization activity	1	13	0.0769231	0.436899	0.86026	1	1	A0A2K3D977_CHLRE
molecular_function	GO:0005227	calcium activated cation channel activity	1	15	0.0666667	0.35651	0.896794	1	1	A0A2K3CZX5_CHLRE
biological_process	GO:0006491	N-glycan processing	1	4	0.25	0.902649	0.454316	1	1	A0A2K3DYA8_CHLRE
molecular_function	GO:0003951	NAD+ kinase activity	1	7	0.142857	0.743378	0.65329	1	1	A0A2K3D5I5_CHLRE
biological_process	GO:0006741	NADP biosynthetic process	1	3	0.333333	0.946376	0.365075	1	1	A0A2K3D5I5_CHLRE
molecular_function	GO:0047834	D-threo-aldose 1-dehydrogenase activity	1	20	0.05	0.20674	0.951637	1	1	A0A2K3DNN5_CHLRE
molecular_function	GO:0043022	ribosome binding	1	33	0.030303	0.0431214	0.993276	0.996	1	A0A2K3DLG8_CHLRE
cellular_component	GO:0070469	respirasome	1	10	0.1	0.187311	0.923811	1	1	A0A2K3DLA1_CHLRE
molecular_function	GO:0009916	alternative oxidase activity	1	4	0.25	0.90277	0.454023	1	1	A0A2K3DLA1_CHLRE
molecular_function	GO:0102721	ubiquinol:oxygen oxidoreductase activity	1	4	0.25	0.90277	0.454023	1	1	A0A2K3DLA1_CHLRE
biological_process	GO:0010230	alternative respiration	1	4	0.25	0.902649	0.454316	1	1	A0A2K3DLA1_CHLRE
cellular_component	GO:0030125	clathrin vesicle coat	1	6	0.166667	0.485705	0.835182	1	1	A0A2K3CPF2_CHLRE
biological_process	GO:0051726	regulation of cell cycle	1	10	0.1	0.999557	0.0010241	1	0.368	A0A2K3CXG1_CHLRE
cellular_component	GO:0009328	phenylalanine-tRNA ligase complex	1	2	0.5	0.98058	0.259395	1	1	A8J168_CHLRE
molecular_function	GO:0004826	phenylalanine-tRNA ligase activity	1	3	0.333333	0.946444	0.364825	1	1	A8J168_CHLRE
biological_process	GO:0006432	phenylalanyl-tRNA aminoacylation	1	3	0.333333	0.946376	0.365075	1	1	A8J168_CHLRE
molecular_function	GO:0008519	ammonium transmembrane transporter activity	1	11	0.0909091	0.529522	0.810808	1	1	Q94CJ2_CHLRE
biological_process	GO:0072488	ammonium transmembrane transport	1	10	0.1	0.579643	0.780205	1	1	Q94CJ2_CHLRE
biological_process	GO:0000055	ribosomal large subunit export from nucleus	1	6	0.166667	0.798657	0.596963	1	1	A8J2W2_CHLRE
biological_process	GO:0006402	mRNA catabolic process	1	6	0.166667	0.984702	0.0263045	1	1	A0A2K3DHQ0_CHLRE
cellular_component	GO:0033179	proton-transporting V-type ATPase, V0 domain	1	4	0.25	0.690782	0.699295	1	1	A8IDY0_CHLRE
biological_process	GO:0016573	histone acetylation	1	13	0.0769231	0.384786	0.836075	1	1	A0A2K3E264_CHLRE
molecular_function	GO:0003906	DNA-(apurinic or apyrimidinic site) endonuclease activity	1	11	0.0909091	0.436899	0.86026	1	1	A0A2K3D4Z3_CHLRE
molecular_function	GO:0008311	double-stranded DNA 3'-5' exodeoxyribonuclease activity	1	6	0.166667	0.798893	0.596623	1	1	A0A2K3D4Z3_CHLRE
biological_process	GO:0006284	base-excision repair	1	15	0.0666667	0.35372	0.854151	1	1	A0A2K3D4Z3_CHLRE
cellular_component	GO:0000812	Swr1 complex	1	8	0.125	0.690782	0.699295	1	1	A0A2K3E2I1_CHLRE
molecular_function	GO:0043139	5'-3' DNA helicase activity	1	11	0.0909091	0.529522	0.810808	1	1	A0A2K3D3N5_CHLRE
cellular_component	GO:0005782	peroxisomal matrix	1	2	0.5	0.98058	0.259395	1	1	A0A2K3E3Y6_CHLRE
biological_process	GO:0016558	protein import into peroxisome matrix	1	6	0.166667	0.529066	0.811132	1	1	A0A2K3CV78_CHLRE
biological_process	GO:0007034	vacuolar transport	1	1	1	0.98963	0.0277037	1	1	A8IDY0_CHLRE
biological_process	GO:0022900	electron transport chain	1	9	0.111111	0.0650421	0.978742	1	1	A0A2K3E1V3_CHLRE
molecular_function	GO:0016874	ligase activity	1	6	0.166667	0.0384545	0.978517	0.993	1	A0A2K3DXT5_CHLRE
biological_process	GO:0016311	dephosphorylation	1	8	0.125	0.285065	0.823714	1	1	A0A2K3E151_CHLRE
biological_process	GO:0019252	starch biosynthetic process	1	14	0.0714286	0.355991	0.897054	1	1	Q9LLL6_CHLRE
biological_process	GO:0010206	photosystem II repair	1	4	0.25	0.902649	0.454316	1	1	A8I9T6_CHLRE
biological_process	GO:0006897	endocytosis	1	15	0.0666667	0.525545	0.702942	1	1	A0A2K3CPF2_CHLRE
biological_process	GO:0016197	endosomal transport	1	7	0.142857	0.235055	0.898771	1	1	A8IAJ1_CHLRE
molecular_function	GO:0032266	phosphatidylinositol-3-phosphate binding	1	5	0.2	0.852702	0.530704	1	1	A0A2K3DFH4_CHLRE
biological_process	GO:0006596	polyamine biosynthetic process	1	5	0.2	0.579643	0.780205	1	1	D5LAU0_CHLRE
molecular_function	GO:0016263	glycoprotein-N-acetylgalactosamine 3-beta-galactosyltransferase activity	1	10	0.1	0.580068	0.779869	1	1	A0A2K3DG20_CHLRE
biological_process	GO:0016267	O-glycan processing, core 1	1	10	0.1	0.579643	0.780205	1	1	A0A2K3DG20_CHLRE
molecular_function	GO:0051787	misfolded protein binding	1	11	0.0909091	0.529522	0.810808	1	1	A0A2K3DDD4_CHLRE
biological_process	GO:0034620	cellular response to unfolded protein	1	8	0.125	0.257968	0.934712	1	1	A0A2K3DDD4_CHLRE
biological_process	GO:0060294	cilium movement involved in cell motility	1	7	0.142857	0.687353	0.702351	1	1	A8J3B6_CHLRE
biological_process	GO:0006979	response to oxidative stress	1	16	0.0625	0.00765236	0.998153	0.718	1	A0A2K3E1V3_CHLRE
biological_process	GO:0009231	riboflavin biosynthetic process	1	10	0.1	0.579643	0.780205	1	1	A0A2K3D1K2_CHLRE
biological_process	GO:0000162	tryptophan biosynthetic process	1	9	0.111111	0.632597	0.74422	1	1	A0A2K3DRC8_CHLRE
molecular_function	GO:0008474	palmitoyl-(protein) hydrolase activity	1	3	0.333333	0.946444	0.364825	1	1	A0A2K3DWL6_CHLRE
cellular_component	GO:0061617	MICOS complex	1	2	0.5	0.98058	0.259395	1	1	A0A2K3DGB1_CHLRE
biological_process	GO:0006730	one-carbon metabolic process	1	10	0.1	0.605147	0.679603	1	1	A0A2K3DLX7_CHLRE
biological_process	GO:0035999	tetrahydrofolate interconversion	1	9	0.111111	0.632597	0.74422	1	1	A0A2K3CZE0_CHLRE
cellular_component	GO:0005891	voltage-gated calcium channel complex	1	3	0.333333	0.947147	0.362666	1	1	B9A0U9_CHLRE
molecular_function	GO:0005245	voltage-gated calcium channel activity	1	3	0.333333	0.946444	0.364825	1	1	B9A0U9_CHLRE
molecular_function	GO:0010487	thermospermine synthase activity	1	1	1	1	0.14038	1	1	D5LAU0_CHLRE
biological_process	GO:0007004	telomere maintenance via telomerase	1	5	0.2	0.852524	0.531026	1	1	A0A2K3DTX9_CHLRE
molecular_function	GO:0008157	protein phosphatase 1 binding	1	3	0.333333	0.946444	0.364825	1	1	A0A2K3D7X7_CHLRE
molecular_function	GO:0004623	phospholipase A2 activity	1	6	0.166667	0.798893	0.596623	1	1	A0A2K3E4S1_CHLRE
biological_process	GO:0090110	COPII-coated vesicle cargo loading	1	6	0.166667	0.798657	0.596963	1	1	A8J5T5_CHLRE
molecular_function	GO:0005458	GDP-mannose transmembrane transporter activity	1	3	0.333333	0.946444	0.364825	1	1	A0A2K3E340_CHLRE
molecular_function	GO:0051010	microtubule plus-end binding	1	2	0.5	0.980308	0.261068	1	1	A0A2K3DVM6_CHLRE
biological_process	GO:0031110	regulation of microtubule polymerization or depolymerization	1	2	0.5	0.902649	0.454316	1	1	A0A2K3CVM7_CHLRE
biological_process	GO:0051225	spindle assembly	1	13	0.0769231	0.76005	0.473852	1	1	A0A2K3DZD8_CHLRE
biological_process	GO:0070973	protein localization to endoplasmic reticulum exit site	1	2	0.5	0.980282	0.261258	1	1	A0A2K3E5D5_CHLRE
cellular_component	GO:0000159	protein phosphatase type 2A complex	1	7	0.142857	0.74607	0.650535	1	1	A8HS05_CHLRE
molecular_function	GO:0019888	protein phosphatase regulator activity	1	8	0.125	0.822676	0.394344	1	1	A8HS05_CHLRE
molecular_function	GO:0016763	pentosyltransferase activity	1	17	0.0588235	0.00508698	0.999087	0.405	1	A0A2K3DGH7_CHLRE
molecular_function	GO:0004722	protein serine/threonine phosphatase activity	1	14	0.0714286	0.90688	0.170051	1	1	A0A2K3DTX8_CHLRE
biological_process	GO:0010207	photosystem II assembly	1	6	0.166667	0.798657	0.596963	1	1	A8I9T6_CHLRE
cellular_component	GO:0031410	cytoplasmic vesicle	1	8	0.125	0.250507	0.822742	1	1	A8HXA2_CHLRE
molecular_function	GO:0004198	calcium-dependent cysteine-type endopeptidase activity	1	6	0.166667	0.798893	0.596623	1	1	A0A2K3D425_CHLRE
cellular_component	GO:0000815	ESCRT III complex	1	6	0.166667	0.801129	0.593877	1	1	A8IRR6_CHLRE
biological_process	GO:0032509	endosome transport via multivesicular body sorting pathway	1	4	0.25	0.320397	0.911551	1	1	A8IRR6_CHLRE
biological_process	GO:0045324	late endosome to vacuole transport	1	6	0.166667	0.257968	0.934712	1	1	A8IRR6_CHLRE
molecular_function	GO:0070122	isopeptidase activity	1	10	0.1	0.580068	0.779869	1	1	A0A2K3E5Q8_CHLRE
molecular_function	GO:0008237	metallopeptidase activity	1	21	0.047619	0.159908	0.907974	1	1	A0A2K3E5Q8_CHLRE
cellular_component	GO:0000276	mitochondrial proton-transporting ATP synthase complex, coupling factor F(o)	1	2	0.5	0.947147	0.362666	1	1	A8JFE2_CHLRE
cellular_component	GO:0016281	eukaryotic translation initiation factor 4F complex	1	5	0.2	0.854435	0.528043	1	1	A0A2K3D4R1_CHLRE
cellular_component	GO:0080008	Cul4-RING E3 ubiquitin ligase complex	1	10	0.1	0.324874	0.909691	1	1	A0A2K3DL86_CHLRE
molecular_function	GO:0043621	protein self-association	1	10	0.1	0.580068	0.779869	1	1	A0A2K3D3U5_CHLRE
molecular_function	GO:0004725	protein tyrosine phosphatase activity	1	31	0.0322581	0.0554255	0.990889	0.999	1	A0A2K3DN43_CHLRE
cellular_component	GO:0005741	mitochondrial outer membrane	1	7	0.142857	0.360536	0.89503	1	1	A0A2K3CX83_CHLRE
cellular_component	GO:0036038	MKS complex	1	6	0.166667	0.801129	0.593877	1	1	A8IWR1_CHLRE
biological_process	GO:0051123	RNA polymerase II preinitiation complex assembly	1	8	0.125	0.579643	0.780205	1	1	A0A2K3D4R7_CHLRE
molecular_function	GO:0030145	manganese ion binding	1	11	0.0909091	0.529522	0.810808	1	1	A0A2K3DKW8_CHLRE
biological_process	GO:0030261	chromosome condensation	1	5	0.2	0.987792	0.0482667	1	1	A0A2K3DLW7_CHLRE
biological_process	GO:0045910	negative regulation of DNA recombination	1	6	0.166667	0.798657	0.596963	1	1	A0A2K3E158_CHLRE
biological_process	GO:0006541	glutamine metabolic process	1	9	0.111111	0.320397	0.911551	1	1	A0A2K3DHP2_CHLRE
biological_process	GO:0032958	inositol phosphate biosynthetic process	1	6	0.166667	0.798657	0.596963	1	1	A0A2K3DUV4_CHLRE
biological_process	GO:1903565	negative regulation of protein localization to cilium	1	1	1	1	0.140488	1	1	A8HYK1_CHLRE
molecular_function	GO:0004659	prenyltransferase activity	1	4	0.25	0.288283	0.923783	1	1	A8HRQ4_CHLRE
cellular_component	GO:0017101	aminoacyl-tRNA synthetase multienzyme complex	1	4	0.25	0.903979	0.451547	1	1	A8J1X8_CHLRE
molecular_function	GO:0004815	aspartate-tRNA ligase activity	1	2	0.5	0.980308	0.261068	1	1	A8J1X8_CHLRE
biological_process	GO:0006422	aspartyl-tRNA aminoacylation	1	2	0.5	0.980282	0.261258	1	1	A8J1X8_CHLRE
biological_process	GO:0006552	leucine catabolic process	1	3	0.333333	0.946376	0.365075	1	1	A0A2K3DXT5_CHLRE
molecular_function	GO:0005085	guanyl-nucleotide exchange factor activity	1	14	0.0714286	0.395155	0.879907	1	1	A0A2K3D6F4_CHLRE
biological_process	GO:0016973	poly(A)+ mRNA export from nucleus	1	8	0.125	0.687353	0.702351	1	1	A0A2K3D472_CHLRE
cellular_component	GO:0005672	transcription factor TFIIA complex	1	2	0.5	0.98058	0.259395	1	1	A0A2K3CY93_CHLRE
molecular_function	GO:0017025	TBP-class protein binding	1	7	0.142857	0.743378	0.65329	1	1	A0A2K3D4R7_CHLRE
molecular_function	GO:0050135	NAD(P)+ nucleosidase activity	1	2	0.5	0.980308	0.261068	1	1	A0A2K3DWT4_CHLRE
molecular_function	GO:0061809	NAD+ nucleotidase, cyclic ADP-ribose generating	1	2	0.5	0.980308	0.261068	1	1	A0A2K3DWT4_CHLRE
biological_process	GO:0034655	nucleobase-containing compound catabolic process	1	2	0.5	0.998155	0.00331574	1	0.809	A0A2K3DWT4_CHLRE
biological_process	GO:1901565	organonitrogen compound catabolic process	1	4	0.25	0.00069916	0.999581	0.096	1	A0A2K3DWT4_CHLRE
biological_process	GO:0006796	phosphate-containing compound metabolic process	1	5	0.2	0.999839	0.000241831	1	0.093	A0A2K3DWT4_CHLRE
biological_process	GO:0044281	small molecule metabolic process	1	2	0.5	0.742835	0.292476	1	1	A0A2K3DWT4_CHLRE
molecular_function	GO:0008801	beta-phosphoglucomutase activity	1	2	0.5	0.980308	0.261068	1	1	A0A2K3D9H0_CHLRE
molecular_function	GO:0050308	sugar-phosphatase activity	1	2	0.5	0.687694	0.702002	1	1	A0A2K3D9H0_CHLRE
molecular_function	GO:0016773	phosphotransferase activity, alcohol group as acceptor	1	7	0.142857	1	1.11778e-09	1	0	A0A2K3DY27_CHLRE
biological_process	GO:0006379	mRNA cleavage	1	5	0.2	0.727882	0.563601	1	1	A0A2K3DEE7_CHLRE
biological_process	GO:0042147	retrograde transport, endosome to Golgi	1	11	0.0909091	0.481243	0.837711	1	1	A0A2K3D2W4_CHLRE
molecular_function	GO:0003987	acetate-CoA ligase activity	1	3	0.333333	0.946444	0.364825	1	1	A8JCQ8_CHLRE
biological_process	GO:0019427	acetyl-CoA biosynthetic process from acetate	1	3	0.333333	0.946376	0.365075	1	1	A8JCQ8_CHLRE
molecular_function	GO:0030674	protein-macromolecule adaptor activity	1	9	0.111111	0.0663161	0.982437	1	1	A0A2K3E736_CHLRE
biological_process	GO:0034982	mitochondrial protein processing	1	2	0.5	0.902649	0.454316	1	1	A0A2K3E613_CHLRE
cellular_component	GO:0000178	exosome (RNase complex)	1	7	0.142857	0.324874	0.909691	1	1	A0A2K3D388_CHLRE
molecular_function	GO:0070403	NAD+ binding	1	7	0.142857	0.743378	0.65329	1	1	A0A2K3D509_CHLRE
molecular_function	GO:0051879	Hsp90 protein binding	1	16	0.0625	0.320917	0.911308	1	1	A0A2K3D5I0_CHLRE
biological_process	GO:0033260	nuclear DNA replication	1	2	0.5	0.68694	0.605357	1	1	A0A2K3DYS2_CHLRE
cellular_component	GO:0070461	SAGA-type complex	1	1	1	0.989028	0.039163	1	1	A8JIK2_CHLRE
biological_process	GO:0006914	autophagy	1	7	0.142857	0.685084	0.473205	1	1	A0A2K3E5D5_CHLRE
cellular_component	GO:0072546	EMC complex	1	8	0.125	0.690782	0.699295	1	1	A0A2K3E7I4_CHLRE
biological_process	GO:0045036	protein targeting to chloroplast	1	4	0.25	0.632597	0.74422	1	1	A0A2K3DWC6_CHLRE
biological_process	GO:0031122	cytoplasmic microtubule organization	1	12	0.0833333	0.921477	0.208116	1	1	A0A2K3E5K1_CHLRE
molecular_function	GO:0016836	hydro-lyase activity	1	4	0.25	0.35835	0.793203	1	1	A0A2K3CTE4_CHLRE
biological_process	GO:0010236	plastoquinone biosynthetic process	1	2	0.5	0.980282	0.261258	1	1	A8HRQ4_CHLRE
molecular_function	GO:0008970	phospholipase A1 activity	1	4	0.25	0.90277	0.454023	1	1	A0A2K3DS10_CHLRE
biological_process	GO:0006694	steroid biosynthetic process	1	7	0.142857	0.287766	0.924008	1	1	A0A2K3DCS1_CHLRE
cellular_component	GO:0031213	RSF complex	1	2	0.5	0.98058	0.259395	1	1	A0A2K3DA11_CHLRE
molecular_function	GO:0008310	single-stranded DNA 3'-5' exodeoxyribonuclease activity	1	3	0.333333	0.946444	0.364825	1	1	A0A2K3DXP3_CHLRE
biological_process	GO:0009166	nucleotide catabolic process	1	4	0.25	0.973736	0.0974972	1	1	A0A2K3DXP6_CHLRE
molecular_function	GO:0016872	intramolecular lyase activity	1	3	0.333333	0.852702	0.530704	1	1	A0A2K3DAW5_CHLRE
molecular_function	GO:0003854	3-beta-hydroxy-delta5-steroid dehydrogenase activity	1	5	0.2	0.852702	0.530704	1	1	A0A2K3DCS1_CHLRE
molecular_function	GO:0031177	phosphopantetheine binding	1	2	0.5	0.980308	0.261068	1	1	A0A2K3DB37_CHLRE
molecular_function	GO:0030623	U5 snRNA binding	1	2	0.5	0.980308	0.261068	1	1	A0A2K3E5Q8_CHLRE
molecular_function	GO:0016538	cyclin-dependent protein serine/threonine kinase regulator activity	1	15	0.0666667	0.288283	0.923783	1	1	A0A2K3DH68_CHLRE
biological_process	GO:0034976	response to endoplasmic reticulum stress	1	3	0.333333	0.00902241	0.998928	0.772	1	A0A2K3CUP4_CHLRE
cellular_component	GO:0000243	commitment complex	1	7	0.142857	0.74607	0.650535	1	1	A0A2K3E1C6_CHLRE
molecular_function	GO:0003774	cytoskeletal motor activity	1	3	0.333333	1	4.28213e-07	1	0	A0A2K3DZE8_CHLRE
molecular_function	GO:0030955	potassium ion binding	1	9	0.111111	0.632983	0.743875	1	1	A0A2K3DST4_CHLRE
molecular_function	GO:0004743	pyruvate kinase activity	1	9	0.111111	0.632983	0.743875	1	1	A0A2K3DST4_CHLRE
biological_process	GO:0006574	valine catabolic process	1	3	0.333333	0.946376	0.365075	1	1	A0A2K3CYQ5_CHLRE
molecular_function	GO:0046873	metal ion transmembrane transporter activity	1	6	0.166667	0.859578	0.201314	1	1	A0A2K3CX70_CHLRE
biological_process	GO:0009249	protein lipoylation	1	5	0.2	0.852524	0.531026	1	1	A0A2K3DGD3_CHLRE
molecular_function	GO:0008889	glycerophosphodiester phosphodiesterase activity	1	10	0.1	0.580068	0.779869	1	1	A0A2K3E3A5_CHLRE
biological_process	GO:0006071	glycerol metabolic process	1	12	0.0833333	0.320397	0.911551	1	1	A0A2K3E3A5_CHLRE
cellular_component	GO:0035145	exon-exon junction complex	1	7	0.142857	0.74607	0.650535	1	1	A0A2K3CZ19_CHLRE
cellular_component	GO:0000221	vacuolar proton-transporting V-type ATPase, V1 domain	1	2	0.5	0.98058	0.259395	1	1	A8HQ97_CHLRE
molecular_function	GO:0035091	phosphatidylinositol binding	1	15	0.0666667	0.297708	0.884558	1	1	A0A2K3E1S3_CHLRE
molecular_function	GO:0008531	riboflavin kinase activity	1	3	0.333333	0.946444	0.364825	1	1	A0A2K3D1K2_CHLRE
biological_process	GO:0009398	FMN biosynthetic process	1	3	0.333333	0.946376	0.365075	1	1	A0A2K3D1K2_CHLRE
biological_process	GO:0006771	riboflavin metabolic process	1	3	0.333333	0.579643	0.780205	1	1	A0A2K3D1K2_CHLRE
molecular_function	GO:0102229	amylopectin maltohydrolase activity	1	3	0.333333	0.946444	0.364825	1	1	A8IMV2_CHLRE
molecular_function	GO:0016161	beta-amylase activity	1	3	0.333333	0.946444	0.364825	1	1	A8IMV2_CHLRE
biological_process	GO:0000272	polysaccharide catabolic process	1	3	0.333333	0.878003	0.31306	1	1	A8IMV2_CHLRE
biological_process	GO:0001731	formation of translation preinitiation complex	1	9	0.111111	0.632597	0.74422	1	1	A0A2K3D3A9_CHLRE
molecular_function	GO:0004556	alpha-amylase activity	1	3	0.333333	0.946444	0.364825	1	1	A0A2K3DGK5_CHLRE
molecular_function	GO:0103025	alpha-amylase activity	1	3	0.333333	NA	NA	NA	NA	A0A2K3DGK5_CHLRE
molecular_function	GO:0050897	cobalt ion binding	1	4	0.25	0.90277	0.454023	1	1	A0A2K3CZ59_CHLRE
molecular_function	GO:0004402	histone acetyltransferase activity	1	10	0.1	0.768511	0.518276	1	1	A0A2K3DS27_CHLRE
molecular_function	GO:0008199	ferric iron binding	1	5	0.2	0.852702	0.530704	1	1	A0A2K3DMK1_CHLRE
molecular_function	GO:0008198	ferrous iron binding	1	12	0.0833333	0.481724	0.837402	1	1	A0A2K3DMK1_CHLRE
molecular_function	GO:0043295	glutathione binding	1	4	0.25	0.90277	0.454023	1	1	A8HUC9_CHLRE
biological_process	GO:0000972	transcription-dependent tethering of RNA polymerase II gene DNA at nuclear periphery	1	3	0.333333	0.852524	0.531026	1	1	A0A2K3D472_CHLRE
biological_process	GO:0046907	intracellular transport	1	6	0.166667	0.100769	0.92365	1	1	A0A2K3E7K9_CHLRE
cellular_component	GO:0000940	outer kinetochore	1	3	0.333333	0.947147	0.362666	1	1	A0A2K3CVM7_CHLRE
molecular_function	GO:0004045	aminoacyl-tRNA hydrolase activity	1	4	0.25	0.90277	0.454023	1	1	A0A2K3CS54_CHLRE
cellular_component	GO:0005675	transcription factor TFIIH holo complex	1	6	0.166667	0.690782	0.699295	1	1	A0A2K3DQN1_CHLRE
molecular_function	GO:0003993	acid phosphatase activity	1	8	0.125	0.687694	0.702002	1	1	A0A2K3DMK1_CHLRE
molecular_function	GO:0018024	histone-lysine N-methyltransferase activity	1	12	0.0833333	0.97957	0.0632806	1	1	A8IYY9_CHLRE
biological_process	GO:0005980	glycogen catabolic process	1	3	0.333333	0.946376	0.365075	1	1	A0A2K3DZS6_CHLRE
biological_process	GO:0051013	microtubule severing	1	6	0.166667	0.798657	0.596963	1	1	A0A2K3DEW9_CHLRE
biological_process	GO:0009247	glycolipid biosynthetic process	1	5	0.2	0.152679	0.951346	1	1	A0A2K3D7P8_CHLRE
cellular_component	GO:0009501	amyloplast	1	8	0.125	0.690782	0.699295	1	1	A0A2K3DNA7_CHLRE
cellular_component	GO:0044613	nuclear pore central transport channel	1	8	0.125	0.690782	0.699295	1	1	A0A2K3DMI1_CHLRE
biological_process	GO:0016485	protein processing	1	6	0.166667	0.124619	0.96222	1	1	A0A2K3D6D8_CHLRE
biological_process	GO:0000290	deadenylation-dependent decapping of nuclear-transcribed mRNA	1	6	0.166667	0.798657	0.596963	1	1	A0A2K3DKW8_CHLRE
cellular_component	GO:0032300	mismatch repair complex	1	10	0.1	0.583738	0.777367	1	1	A8HM54_CHLRE
cellular_component	GO:0032389	MutLalpha complex	1	2	0.5	0.98058	0.259395	1	1	A8HM54_CHLRE
cellular_component	GO:0009543	chloroplast thylakoid lumen	1	5	0.2	0.854435	0.528043	1	1	A8I9T6_CHLRE
biological_process	GO:0035269	protein O-linked mannosylation	1	12	0.0833333	0.481243	0.837711	1	1	A0A2K3CPK2_CHLRE
molecular_function	GO:0004177	aminopeptidase activity	1	4	0.25	0.35651	0.896794	1	1	A0A2K3CVF8_CHLRE
molecular_function	GO:0070034	telomerase RNA binding	1	3	0.333333	0.946444	0.364825	1	1	A0A2K3DTX9_CHLRE
molecular_function	GO:0030619	U1 snRNA binding	1	5	0.2	0.852702	0.530704	1	1	A0A2K3E5Q8_CHLRE
biological_process	GO:0000160	phosphorelay signal transduction system	1	9	0.111111	0.394643	0.880184	1	1	A0A2K3CVU2_CHLRE
biological_process	GO:0070646	protein modification by small protein removal	1	5	0.2	0.998976	0.00225681	1	0.653	A8I9X2_CHLRE
biological_process	GO:0042254	ribosome biogenesis	1	13	0.0769231	0.0298264	0.980674	0.997	1	A0A2K3D080_CHLRE
cellular_component	GO:0005952	cAMP-dependent protein kinase complex	1	6	0.166667	0.801129	0.593877	1	1	A0A2K3DAN5_CHLRE
molecular_function	GO:0004691	cAMP-dependent protein kinase activity	1	6	0.166667	0.798893	0.596623	1	1	A0A2K3DAN5_CHLRE
molecular_function	GO:0004300	enoyl-CoA hydratase activity	1	5	0.2	0.852702	0.530704	1	1	A0A2K3D509_CHLRE
molecular_function	GO:0003844	1,4-alpha-glucan branching enzyme activity	1	4	0.25	0.90277	0.454023	1	1	A0A2K3DNA7_CHLRE
molecular_function	GO:0102752	1,4-alpha-glucan branching enzyme activity (using a glucosylated glycogenin as primer for glycogen synthesis)	1	4	0.25	0.90277	0.454023	1	1	A0A2K3DNA7_CHLRE
molecular_function	GO:0043169	cation binding	1	5	0.2	0.394728	0.637255	1	1	A0A2K3DNA7_CHLRE
molecular_function	GO:0004798	thymidylate kinase activity	1	2	0.5	0.980308	0.261068	1	1	A0A2K3DYD5_CHLRE
molecular_function	GO:0009041	uridylate kinase activity	1	2	0.5	0.852702	0.530704	1	1	A0A2K3DYD5_CHLRE
biological_process	GO:0006233	dTDP biosynthetic process	1	2	0.5	0.980282	0.261258	1	1	A0A2K3DYD5_CHLRE
biological_process	GO:0006235	dTTP biosynthetic process	1	2	0.5	0.980282	0.261258	1	1	A0A2K3DYD5_CHLRE
biological_process	GO:0006227	dUDP biosynthetic process	1	2	0.5	0.980282	0.261258	1	1	A0A2K3DYD5_CHLRE
biological_process	GO:0008152	metabolic process	1	4	0.25	0.014549	0.988135	0.924	1	A0A2K3D3L3_CHLRE
molecular_function	GO:0016746	acyltransferase activity	1	10	0.1	0.113032	0.925059	1	1	A0A2K3E5X6_CHLRE
biological_process	GO:0098789	pre-mRNA cleavage required for polyadenylation	1	8	0.125	0.687353	0.702351	1	1	A0A2K3CUY3_CHLRE
biological_process	GO:0015996	chlorophyll catabolic process	1	5	0.2	0.852524	0.531026	1	1	A0A2K3DVK9_CHLRE
molecular_function	GO:0101005	deubiquitinase activity	1	3	0.333333	0.763341	0.365032	1	1	A8I9X2_CHLRE
biological_process	GO:0006271	DNA strand elongation involved in DNA replication	1	5	0.2	0.963753	0.121997	1	1	A0A2K3DIP5_CHLRE
biological_process	GO:0006297	nucleotide-excision repair, DNA gap filling	1	6	0.166667	0.798657	0.596963	1	1	A0A2K3DXP3_CHLRE
cellular_component	GO:0000145	exocyst	1	10	0.1	0.583738	0.777367	1	1	A0A2K3E4T8_CHLRE
biological_process	GO:0006893	Golgi to plasma membrane transport	1	9	0.111111	0.481243	0.837711	1	1	A0A2K3E4T8_CHLRE
molecular_function	GO:0004817	cysteine-tRNA ligase activity	1	2	0.5	0.980308	0.261068	1	1	A0A2K3E8I8_CHLRE
biological_process	GO:0006423	cysteinyl-tRNA aminoacylation	1	2	0.5	0.980282	0.261258	1	1	A0A2K3E8I8_CHLRE
cellular_component	GO:0000779	condensed chromosome, centromeric region	1	3	0.333333	0.864605	0.3012	1	1	A0A2K3D9Y5_CHLRE
biological_process	GO:0032781	positive regulation of ATP-dependent activity	1	5	0.2	0.743087	0.653638	1	1	A0A2K3CNN5_CHLRE
biological_process	GO:0042407	cristae formation	1	2	0.5	0.980282	0.261258	1	1	A0A2K3DGB1_CHLRE
biological_process	GO:0006085	acetyl-CoA biosynthetic process	1	4	0.25	0.80724	0.470934	1	1	A0A2K3E3Y6_CHLRE
biological_process	GO:0030178	negative regulation of Wnt signaling pathway	1	1	1	0.980282	0.261258	1	1	A0A2K3E500_CHLRE
molecular_function	GO:0032542	sulfiredoxin activity	1	2	0.5	0.980308	0.261068	1	1	A0A2K3CQW5_CHLRE
molecular_function	GO:0015299	solute:proton antiporter activity	1	4	0.25	0.605656	0.679083	1	1	A0A2K3CUL6_CHLRE
biological_process	GO:0006631	fatty acid metabolic process	1	11	0.0909091	0.0289066	0.990411	0.997	1	A0A2K3D509_CHLRE
molecular_function	GO:0008821	crossover junction endodeoxyribonuclease activity	1	3	0.333333	0.946444	0.364825	1	1	A0A2K3D5X4_CHLRE
cellular_component	GO:0008023	transcription elongation factor complex	1	6	0.166667	0.816961	0.3685	1	1	A0A2K3DF59_CHLRE
biological_process	GO:0030242	autophagy of peroxisome	1	5	0.2	0.852524	0.531026	1	1	A0A2K3DFH4_CHLRE
cellular_component	GO:0046695	SLIK (SAGA-like) complex	1	2	0.5	0.98058	0.259395	1	1	A0A2K3D4R7_CHLRE
molecular_function	GO:0004519	endonuclease activity	1	14	0.0714286	0.767223	0.341821	1	1	A0A2K3DUT4_CHLRE
molecular_function	GO:0043842	Kdo transferase activity	1	1	1	1	0.14038	1	1	A0A2K3D0H4_CHLRE
biological_process	GO:0009245	lipid A biosynthetic process	1	3	0.333333	0.946376	0.365075	1	1	A0A2K3D0H4_CHLRE
biological_process	GO:0034968	histone lysine methylation	1	11	0.0909091	0.452234	0.793745	1	1	A8IYY9_CHLRE
biological_process	GO:0001682	tRNA 5'-leader removal	1	7	0.142857	0.743087	0.653638	1	1	A0A2K3DUQ9_CHLRE
molecular_function	GO:0003910	DNA ligase (ATP) activity	1	4	0.25	0.90277	0.454023	1	1	A0A2K3DP21_CHLRE
biological_process	GO:0017183	peptidyl-diphthamide biosynthetic process from peptidyl-histidine	1	7	0.142857	0.743087	0.653638	1	1	A0A2K3E6V0_CHLRE
biological_process	GO:0048511	rhythmic process	1	2	0.5	0.798657	0.596963	1	1	A0A2K3CVU2_CHLRE
molecular_function	GO:0035299	inositol pentakisphosphate 2-kinase activity	1	3	0.333333	0.946444	0.364825	1	1	A0A2K3DUV4_CHLRE
molecular_function	GO:0000406	double-strand/single-strand DNA junction binding	1	2	0.5	0.980308	0.261068	1	1	A0A2K3DUT4_CHLRE
molecular_function	GO:0070336	flap-structured DNA binding	1	2	0.5	0.980308	0.261068	1	1	A0A2K3DUT4_CHLRE
molecular_function	GO:0000403	Y-form DNA binding	1	1	1	1	0.14038	1	1	A0A2K3DUT4_CHLRE
biological_process	GO:0010792	DNA double-strand break processing involved in repair via single-strand annealing	1	1	1	1	0.140488	1	1	A0A2K3DUT4_CHLRE
molecular_function	GO:0050080	malonyl-CoA decarboxylase activity	1	1	1	1	0.14038	1	1	A0A2K3E3Y6_CHLRE
biological_process	GO:2001294	malonyl-CoA catabolic process	1	1	1	1	0.140488	1	1	A0A2K3E3Y6_CHLRE
biological_process	GO:0046321	positive regulation of fatty acid oxidation	1	1	1	1	0.140488	1	1	A0A2K3E3Y6_CHLRE
biological_process	GO:0006464	cellular protein modification process	1	14	0.0714286	0.00325273	0.997658	0.391	1	A0A2K3DLC5_CHLRE
cellular_component	GO:0000323	lytic vacuole	1	4	0.25	0.901216	0.209193	1	1	A0A2K3D063_CHLRE
biological_process	GO:0035493	SNARE complex assembly	1	4	0.25	0.902649	0.454316	1	1	A0A2K3D063_CHLRE
cellular_component	GO:0035327	euchromatin	1	3	0.333333	NA	NA	NA	NA	A0A2K3DF59_CHLRE
biological_process	GO:0042789	mRNA transcription by RNA polymerase II	1	1	1	1	0.140488	1	1	A0A2K3DF59_CHLRE
biological_process	GO:0034728	nucleosome organization	1	1	1	0.277127	0.850442	1	1	A0A2K3DF59_CHLRE
biological_process	GO:0050684	regulation of mRNA processing	1	2	0.5	0.579643	0.780205	1	1	A0A2K3DF59_CHLRE
molecular_function	GO:0070740	tubulin-glutamic acid ligase activity	1	12	0.0833333	0.481724	0.837402	1	1	A0A2K3D881_CHLRE
biological_process	GO:0018095	protein polyglutamylation	1	12	0.0833333	0.481243	0.837711	1	1	A0A2K3D881_CHLRE
molecular_function	GO:0000400	four-way junction DNA binding	1	2	0.5	0.980308	0.261068	1	1	A0A2K3DZT7_CHLRE
biological_process	GO:0045003	double-strand break repair via synthesis-dependent strand annealing	1	4	0.25	0.743087	0.653638	1	1	A0A2K3DZT7_CHLRE
biological_process	GO:0036297	interstrand cross-link repair	1	10	0.1	0.529066	0.811132	1	1	A0A2K3DZT7_CHLRE
cellular_component	GO:0016593	Cdc73/Paf1 complex	1	6	0.166667	0.801129	0.593877	1	1	A0A2K3CSD5_CHLRE
biological_process	GO:0016570	histone modification	1	7	0.142857	0.144024	0.924296	1	1	A0A2K3CSD5_CHLRE
cellular_component	GO:1905202	methylcrotonoyl-CoA carboxylase complex	1	1	1	1	0.139407	1	1	A0A2K3DXT5_CHLRE
molecular_function	GO:0015020	glucuronosyltransferase activity	1	10	0.1	0.580068	0.779869	1	1	A0A2K3CPK2_CHLRE
molecular_function	GO:0042285	xylosyltransferase activity	1	10	0.1	0.580068	0.779869	1	1	A0A2K3CPK2_CHLRE
molecular_function	GO:0015079	potassium ion transmembrane transporter activity	1	6	0.166667	0.943595	0.122386	1	1	A0A2K3DT99_CHLRE
biological_process	GO:0006203	dGTP catabolic process	1	3	0.333333	0.946376	0.365075	1	1	A0A2K3DFK8_CHLRE
biological_process	GO:0043666	regulation of phosphoprotein phosphatase activity	1	4	0.25	0.743087	0.653638	1	1	A0A2K3DTD2_CHLRE
biological_process	GO:0009966	regulation of signal transduction	1	2	0.5	0.659764	0.582355	1	1	A0A2K3DTD2_CHLRE
biological_process	GO:0031573	mitotic intra-S DNA damage checkpoint signaling	1	4	0.25	0.902649	0.454316	1	1	A0A2K3D5X4_CHLRE
molecular_function	GO:0004439	phosphatidylinositol-4,5-bisphosphate 5-phosphatase activity	1	4	0.25	0.90277	0.454023	1	1	A0A2K3CZ37_CHLRE
biological_process	GO:0046856	phosphatidylinositol dephosphorylation	1	7	0.142857	0.743087	0.653638	1	1	A0A2K3CZ37_CHLRE
biological_process	GO:0001514	selenocysteine incorporation	1	4	0.25	0.902649	0.454316	1	1	A0A2K3DWP4_CHLRE
molecular_function	GO:0042781	3'-tRNA processing endoribonuclease activity	1	4	0.25	0.90277	0.454023	1	1	A0A2K3CVZ2_CHLRE
biological_process	GO:0072684	mitochondrial tRNA 3'-trailer cleavage, endonucleolytic	1	2	0.5	0.980282	0.261258	1	1	A0A2K3CVZ2_CHLRE
cellular_component	GO:0005745	m-AAA complex	1	1	1	1	0.139407	1	1	A0A2K3E613_CHLRE
cellular_component	GO:0009526	plastid envelope	1	2	0.5	0.616941	0.457781	1	1	A0A2K3E613_CHLRE
biological_process	GO:0065003	protein-containing complex assembly	1	1	1	0.000251692	0.999877	0.037	1	A0A2K3E613_CHLRE
cellular_component	GO:0070761	pre-snoRNP complex	1	1	1	1	0.139407	1	1	A0A2K3E7Y1_CHLRE
biological_process	GO:0048254	snoRNA localization	1	1	1	1	0.140488	1	1	A0A2K3E7Y1_CHLRE
molecular_function	GO:0004535	poly(A)-specific ribonuclease activity	1	7	0.142857	0.743378	0.65329	1	1	A0A2K3D7N1_CHLRE
biological_process	GO:0006974	cellular response to DNA damage stimulus	1	8	0.125	1	8.95135e-11	1	0	A0A2K3D2G9_CHLRE
biological_process	GO:0042766	nucleosome mobilization	1	2	0.5	0.980282	0.261258	1	1	A0A2K3D2K4_CHLRE
cellular_component	GO:0097550	transcription preinitiation complex	1	3	0.333333	0.947147	0.362666	1	1	A0A2K3DQN1_CHLRE
biological_process	GO:0000122	negative regulation of transcription by RNA polymerase II	1	10	0.1	0.579643	0.780205	1	1	A0A2K3D7C3_CHLRE
molecular_function	GO:0047746	chlorophyllase activity	1	4	0.25	0.90277	0.454023	1	1	A0A2K3DVK9_CHLRE
cellular_component	GO:0009897	external side of plasma membrane	1	2	0.5	0.98058	0.259395	1	1	A0A2K3D619_CHLRE
molecular_function	GO:0042910	xenobiotic transmembrane transporter activity	1	19	0.0526316	0.130024	0.973636	1	1	A0A2K3E827_CHLRE
biological_process	GO:1990961	xenobiotic detoxification by transmembrane export across the plasma membrane	1	10	0.1	0.579643	0.780205	1	1	A0A2K3E827_CHLRE
cellular_component	GO:0009341	beta-galactosidase complex	1	6	0.166667	0.801129	0.593877	1	1	A0A2K3DHX9_CHLRE
molecular_function	GO:0004565	beta-galactosidase activity	1	6	0.166667	0.798893	0.596623	1	1	A0A2K3DHX9_CHLRE
molecular_function	GO:0003896	DNA primase activity	1	3	0.333333	0.946444	0.364825	1	1	A0A2K3D744_CHLRE
biological_process	GO:0006264	mitochondrial DNA replication	1	4	0.25	0.902649	0.454316	1	1	A0A2K3D744_CHLRE
biological_process	GO:0009411	response to UV	1	5	0.2	0.632597	0.74422	1	1	A0A2K3D744_CHLRE
biological_process	GO:0035735	intraciliary transport involved in cilium assembly	1	4	0.25	0.902649	0.454316	1	1	A0A2K3E6H6_CHLRE
cellular_component	GO:0000126	transcription factor TFIIIB complex	1	2	0.5	0.98058	0.259395	1	1	A0A2K3CWE3_CHLRE
molecular_function	GO:0001156	TFIIIC-class transcription factor complex binding	1	1	1	1	0.14038	1	1	A0A2K3CWE3_CHLRE
biological_process	GO:0070898	RNA polymerase III preinitiation complex assembly	1	1	1	1	0.140488	1	1	A0A2K3CWE3_CHLRE
biological_process	GO:0016236	macroautophagy	1	5	0.2	0.847363	0.288895	1	1	A0A2K3D1G5_CHLRE
cellular_component	GO:0043527	tRNA methyltransferase complex	1	5	0.2	0.938776	0.25393	1	1	A0A2K3E1W6_CHLRE
molecular_function	GO:0008176	tRNA (guanine-N7-)-methyltransferase activity	1	4	0.25	0.90277	0.454023	1	1	A0A2K3E1W6_CHLRE
biological_process	GO:0036265	RNA (guanine-N7)-methylation	1	4	0.25	0.743087	0.653638	1	1	A0A2K3E1W6_CHLRE
molecular_function	GO:0003954	NADH dehydrogenase activity	1	2	0.5	0.526723	0.741522	1	1	A0A2K3DS00_CHLRE
biological_process	GO:0000712	resolution of meiotic recombination intermediates	1	4	0.25	0.902649	0.454316	1	1	A0A2K3D5X4_CHLRE
molecular_function	GO:0102756	very-long-chain 3-ketoacyl-CoA synthase activity	1	3	0.333333	0.946444	0.364825	1	1	A0A2K3CP03_CHLRE
cellular_component	GO:0005635	nuclear envelope	1	8	0.125	0.232718	0.879305	1	1	A0A2K3E0S6_CHLRE
molecular_function	GO:0004523	RNA-DNA hybrid ribonuclease activity	1	11	0.0909091	0.529522	0.810808	1	1	A0A2K3E472_CHLRE
molecular_function	GO:0015386	potassium:proton antiporter activity	1	8	0.125	0.687694	0.702002	1	1	A0A2K3DSM2_CHLRE
molecular_function	GO:0015385	sodium:proton antiporter activity	1	8	0.125	0.687694	0.702002	1	1	A0A2K3DSM2_CHLRE
biological_process	GO:0098719	sodium ion import across plasma membrane	1	7	0.142857	0.743087	0.653638	1	1	A0A2K3DSM2_CHLRE
molecular_function	GO:0036310	ATP-dependent DNA/DNA annealing activity	1	2	0.5	0.980308	0.261068	1	1	A0A2K3DSU7_CHLRE
molecular_function	GO:0050242	pyruvate, phosphate dikinase activity	1	2	0.5	0.980308	0.261068	1	1	A0A2K3CR97_CHLRE
molecular_function	GO:0008236	serine-type peptidase activity	1	12	0.0833333	0.901481	0.150576	1	1	A0A2K3CZE2_CHLRE
cellular_component	GO:0031588	nucleotide-activated protein kinase complex	1	1	1	1	0.139407	1	1	A0A2K3D1M9_CHLRE
molecular_function	GO:0019887	protein kinase regulator activity	1	3	0.333333	0.272088	0.897611	1	1	A0A2K3D1M9_CHLRE
biological_process	GO:0042149	cellular response to glucose starvation	1	1	1	1	0.140488	1	1	A0A2K3D1M9_CHLRE
biological_process	GO:0050790	regulation of catalytic activity	1	6	0.166667	0.0887363	0.959002	1	1	A0A2K3D1M9_CHLRE
biological_process	GO:0034088	maintenance of mitotic sister chromatid cohesion	1	2	0.5	0.980282	0.261258	1	1	A0A2K3CW19_CHLRE
biological_process	GO:0007032	endosome organization	1	4	0.25	0.902649	0.454316	1	1	A8IAJ1_CHLRE
biological_process	GO:0007033	vacuole organization	1	3	0.333333	0.912636	0.191019	1	1	A8IAJ1_CHLRE
biological_process	GO:0006904	vesicle docking involved in exocytosis	1	5	0.2	0.852524	0.531026	1	1	A0A2K3E4T8_CHLRE
molecular_function	GO:0035312	5'-3' exodeoxyribonuclease activity	1	4	0.25	0.977872	0.147298	1	1	A0A2K3DLI8_CHLRE
cellular_component	GO:0032777	Piccolo NuA4 histone acetyltransferase complex	1	4	0.25	0.903979	0.451547	1	1	A0A2K3E264_CHLRE
cellular_component	GO:0043229	intracellular organelle	1	11	0.0909091	0.233866	0.785241	1	1	A0A2K3DHR8_CHLRE
biological_process	GO:0043967	histone H4 acetylation	1	4	0.25	0.852524	0.531026	1	1	A0A2K3DY38_CHLRE
molecular_function	GO:0017116	single-stranded DNA helicase activity	1	1	1	1	0.14038	1	1	A0A2K3D4L9_CHLRE
biological_process	GO:0033567	DNA replication, Okazaki fragment processing	1	2	0.5	0.980282	0.261258	1	1	A0A2K3D4L9_CHLRE
molecular_function	GO:0008296	3'-5'-exodeoxyribonuclease activity	1	4	0.25	0.902672	0.271737	1	1	A0A2K3DT50_CHLRE
cellular_component	GO:0008278	cohesin complex	1	2	0.5	0.990742	0.0612237	1	1	A0A2K3CRF0_CHLRE
cellular_component	GO:0030677	ribonuclease P complex	1	3	0.333333	0.74607	0.650535	1	1	A0A2K3DUQ9_CHLRE
biological_process	GO:0009234	menaquinone biosynthetic process	1	3	0.333333	0.946376	0.365075	1	1	A0A2K3CTE4_CHLRE
biological_process	GO:0008615	pyridoxine biosynthetic process	1	3	0.333333	0.946376	0.365075	1	1	A0A2K3DHV3_CHLRE
biological_process	GO:0006513	protein monoubiquitination	1	4	0.25	0.743087	0.653638	1	1	A0A2K3E231_CHLRE
molecular_function	GO:0015616	DNA translocase activity	1	4	0.25	0.90277	0.454023	1	1	A0A2K3DXW1_CHLRE
molecular_function	GO:0061863	microtubule plus end polymerase	1	1	1	1	0.14038	1	1	A0A2K3DVM6_CHLRE
biological_process	GO:0030951	establishment or maintenance of microtubule cytoskeleton polarity	1	1	1	1	0.140488	1	1	A0A2K3DVM6_CHLRE
biological_process	GO:0046785	microtubule polymerization	1	1	1	0.579643	0.780205	1	1	A0A2K3DVM6_CHLRE
cellular_component	GO:0070545	PeBoW complex	1	2	0.5	0.98058	0.259395	1	1	A0A2K3D8Y8_CHLRE
molecular_function	GO:0000030	mannosyltransferase activity	1	4	0.25	0.436899	0.86026	1	1	A0A2K3D3T2_CHLRE
molecular_function	GO:0070577	lysine-acetylated histone binding	1	2	0.5	0.980308	0.261068	1	1	A0A2K3E7W8_CHLRE
molecular_function	GO:0031493	obsolete nucleosomal histone binding	1	1	1	1	0.14038	1	1	A0A2K3E7W8_CHLRE
molecular_function	GO:0015113	nitrite transmembrane transporter activity	1	3	0.333333	0.946444	0.364825	1	1	A0A2K3DD68_CHLRE
cellular_component	GO:0048476	Holliday junction resolvase complex	1	1	1	1	0.139407	1	1	A0A2K3D5X4_CHLRE
molecular_function	GO:0048257	3'-flap endonuclease activity	1	1	1	1	0.14038	1	1	A0A2K3D5X4_CHLRE
biological_process	GO:0000737	DNA catabolic process, endonucleolytic	1	1	1	1	0.140488	1	1	A0A2K3D5X4_CHLRE
biological_process	GO:0007094	mitotic spindle assembly checkpoint signaling	1	6	0.166667	0.798657	0.596963	1	1	A0A2K3DI01_CHLRE
biological_process	GO:0042391	regulation of membrane potential	1	13	0.0769231	0.436399	0.860554	1	1	A0A2K3E4W0_CHLRE
molecular_function	GO:0043024	ribosomal small subunit binding	1	6	0.166667	0.798893	0.596623	1	1	A0A2K3D3A9_CHLRE
molecular_function	GO:0038023	signaling receptor activity	1	6	0.166667	1	1.07551e-20	1	0	A0A2K3D6T2_CHLRE
biological_process	GO:0044772	mitotic cell cycle phase transition	1	9	0.111111	0.888136	0.210057	1	1	A0A2K3DH68_CHLRE
molecular_function	GO:0016810	hydrolase activity, acting on carbon-nitrogen (but not peptide) bonds	1	4	0.25	0.00551616	0.998716	0.43	1	A0A2K3E3L6_CHLRE
molecular_function	GO:0005113	patched binding	1	1	1	1	0.14038	1	1	A0A2K3CRT2_CHLRE
molecular_function	GO:0005119	smoothened binding	1	1	1	1	0.14038	1	1	A0A2K3CRT2_CHLRE
biological_process	GO:0007166	cell surface receptor signaling pathway	1	4	0.25	1	3.24354e-10	1	0	A0A2K3DQP9_CHLRE
molecular_function	GO:1990269	RNA polymerase II C-terminal domain phosphoserine binding	1	2	0.5	0.980308	0.261068	1	1	A0A2K3CSD5_CHLRE
molecular_function	GO:0033699	DNA 5'-adenosine monophosphate hydrolase activity	1	1	1	1	0.14038	1	1	A0A2K3DQR5_CHLRE
molecular_function	GO:1990165	single-strand break-containing DNA binding	1	1	1	1	0.14038	1	1	A0A2K3DQR5_CHLRE
biological_process	GO:0006654	phosphatidic acid biosynthetic process	1	3	0.333333	0.946376	0.365075	1	1	A0A2K3E4S1_CHLRE
biological_process	GO:0048870	cell motility	1	2	0.5	0.693677	0.547766	1	1	A0A2K3CXC4_CHLRE
molecular_function	GO:0008476	protein-tyrosine sulfotransferase activity	1	1	1	1	0.14038	1	1	A0A2K3DC67_CHLRE
biological_process	GO:0006478	peptidyl-tyrosine sulfation	1	1	1	1	0.140488	1	1	A0A2K3DC67_CHLRE
molecular_function	GO:0017017	MAP kinase tyrosine/serine/threonine phosphatase activity	1	1	1	1	0.14038	1	1	A0A2K3DN43_CHLRE
molecular_function	GO:0008330	protein tyrosine/threonine phosphatase activity	1	1	1	1	0.14038	1	1	A0A2K3DN43_CHLRE
biological_process	GO:0043409	negative regulation of MAPK cascade	1	3	0.333333	0.902649	0.454316	1	1	A0A2K3DN43_CHLRE
cellular_component	GO:0000164	protein phosphatase type 1 complex	1	2	0.5	0.98058	0.259395	1	1	A0A2K3D7X7_CHLRE
molecular_function	GO:0048487	beta-tubulin binding	1	4	0.25	0.90277	0.454023	1	1	A0A2K3E6H6_CHLRE
molecular_function	GO:0097367	carbohydrate derivative binding	1	1	1	1	4.21107e-09	1	0	A0A2K3DHP2_CHLRE
molecular_function	GO:0004360	glutamine-fructose-6-phosphate transaminase (isomerizing) activity	1	1	1	1	0.14038	1	1	A0A2K3DHP2_CHLRE
biological_process	GO:0006047	UDP-N-acetylglucosamine metabolic process	1	1	1	0.687353	0.702351	1	1	A0A2K3DHP2_CHLRE
molecular_function	GO:0061666	UFM1 ligase activity	1	1	1	1	0.14038	1	1	A0A2K3CUP4_CHLRE
biological_process	GO:0032434	regulation of proteasomal ubiquitin-dependent protein catabolic process	1	1	1	0.355991	0.897054	1	1	A0A2K3CUP4_CHLRE
molecular_function	GO:0051499	D-aminoacyl-tRNA deacylase activity	1	2	0.5	0.99724	0.0535559	1	1	A0A2K3D6U1_CHLRE
molecular_function	GO:0001042	RNA polymerase I core binding	1	1	1	1	0.14038	1	1	A0A2K3DYV6_CHLRE
molecular_function	GO:0001181	RNA polymerase I general transcription initiation factor activity	1	1	1	1	0.14038	1	1	A0A2K3DYV6_CHLRE
biological_process	GO:0006361	transcription initiation from RNA polymerase I promoter	1	1	1	0.980282	0.261258	1	1	A0A2K3DYV6_CHLRE
cellular_component	GO:0016589	NURF complex	1	1	1	1	0.139407	1	1	A0A2K3D2K4_CHLRE
molecular_function	GO:0035064	methylated histone binding	1	3	0.333333	0.946444	0.364825	1	1	A0A2K3D2K4_CHLRE
biological_process	GO:0002084	protein depalmitoylation	1	2	0.5	0.980282	0.261258	1	1	A0A2K3DWL6_CHLRE
molecular_function	GO:0004526	ribonuclease P activity	1	4	0.25	0.90277	0.454023	1	1	A0A2K3DUQ9_CHLRE
biological_process	GO:0009267	cellular response to starvation	1	3	0.333333	0.727882	0.563601	1	1	A0A2K3D1G5_CHLRE
molecular_function	GO:0050072	m7G(5')pppN diphosphatase activity	1	3	0.333333	0.946444	0.364825	1	1	A0A2K3DKW8_CHLRE
molecular_function	GO:0016653	oxidoreductase activity, acting on NAD(P)H, heme protein as acceptor	1	1	1	0.798893	0.596623	1	1	A0A2K3E0L0_CHLRE
biological_process	GO:0006784	heme A biosynthetic process	1	1	1	1	0.140488	1	1	A0A2K3E0L0_CHLRE
molecular_function	GO:0004329	formate-tetrahydrofolate ligase activity	1	1	1	1	0.14038	1	1	A0A2K3CZE0_CHLRE
molecular_function	GO:0008832	dGTPase activity	1	2	0.5	0.980308	0.261068	1	1	A0A2K3DFK8_CHLRE
biological_process	GO:0000911	cytokinesis by cell plate formation	1	4	0.25	0.960257	0.201343	1	1	A8IFY9_CHLRE
molecular_function	GO:0010485	H4 histone acetyltransferase activity	1	2	0.5	0.980308	0.261068	1	1	A0A2K3DY38_CHLRE
molecular_function	GO:0004072	aspartate kinase activity	1	3	0.333333	0.946444	0.364825	1	1	A0A2K3DBP3_CHLRE
biological_process	GO:0009090	homoserine biosynthetic process	1	2	0.5	0.980282	0.261258	1	1	A0A2K3DBP3_CHLRE
cellular_component	GO:0000228	nuclear chromosome	1	5	0.2	0.677526	0.46199	1	1	A0A2K3CXW5_CHLRE
molecular_function	GO:0015187	glycine transmembrane transporter activity	1	1	1	1	0.14038	1	1	A0A2K3DPZ8_CHLRE
biological_process	GO:1904983	glycine import into mitochondrion	1	1	1	1	0.140488	1	1	A0A2K3DPZ8_CHLRE
molecular_function	GO:0033592	RNA strand annealing activity	1	2	0.5	0.980308	0.261068	1	1	A0A2K3D3A9_CHLRE
molecular_function	GO:0034057	RNA strand-exchange activity	1	2	0.5	0.980308	0.261068	1	1	A0A2K3D3A9_CHLRE
biological_process	GO:0097010	eukaryotic translation initiation factor 4F complex assembly	1	2	0.5	0.980282	0.261258	1	1	A0A2K3D3A9_CHLRE
biological_process	GO:0000914	phragmoplast assembly	1	1	1	1	0.140488	1	1	A0A2K3CXA7_CHLRE
cellular_component	GO:0032588	trans-Golgi network membrane	1	3	0.333333	0.947147	0.362666	1	1	A0A2K3E134_CHLRE
molecular_function	GO:0008187	poly-pyrimidine tract binding	1	3	0.333333	0.977872	0.147298	1	1	A0A2K3E1C6_CHLRE
molecular_function	GO:0050113	inositol oxygenase activity	1	1	1	1	0.14038	1	1	A0A2K3E6C1_CHLRE
biological_process	GO:0019310	inositol catabolic process	1	1	1	1	0.140488	1	1	A0A2K3E6C1_CHLRE
biological_process	GO:0019853	L-ascorbic acid biosynthetic process	1	3	0.333333	0.946376	0.365075	1	1	A0A2K3E6C1_CHLRE
molecular_function	GO:0003986	acetyl-CoA hydrolase activity	1	1	1	1	0.14038	1	1	A0A2K3E0I0_CHLRE
molecular_function	GO:0010945	CoA pyrophosphatase activity	1	1	1	1	0.14038	1	1	A0A2K3E0I0_CHLRE
biological_process	GO:0015938	coenzyme A catabolic process	1	1	1	1	0.140488	1	1	A0A2K3E0I0_CHLRE
biological_process	GO:0006869	lipid transport	1	13	0.0769231	0.497238	0.700769	1	1	A0A2K3D0Q0_CHLRE
molecular_function	GO:0016992	lipoate synthase activity	1	2	0.5	0.980308	0.261068	1	1	A0A2K3DGD3_CHLRE
molecular_function	GO:0102552	lipoyl synthase activity (acting on glycine-cleavage complex H protein	1	2	0.5	0.980308	0.261068	1	1	A0A2K3DGD3_CHLRE
molecular_function	GO:0102553	lipoyl synthase activity (acting on pyruvate dehydrogenase E2 protein)	1	2	0.5	0.980308	0.261068	1	1	A0A2K3DGD3_CHLRE
biological_process	GO:0009107	lipoate biosynthetic process	1	2	0.5	0.980282	0.261258	1	1	A0A2K3DGD3_CHLRE
biological_process	GO:0070989	oxidative demethylation	1	2	0.5	0.960257	0.201343	1	1	A0A2K3DS01_CHLRE
biological_process	GO:0007338	single fertilization	1	1	1	1	0.140488	1	1	A0A2K3CVT5_CHLRE
biological_process	GO:0006287	base-excision repair, gap-filling	1	3	0.333333	0.946376	0.365075	1	1	A0A2K3DXP3_CHLRE
biological_process	GO:0045004	DNA replication proofreading	1	3	0.333333	0.946376	0.365075	1	1	A0A2K3DXP3_CHLRE
cellular_component	GO:0009330	DNA topoisomerase type II (double strand cut, ATP-hydrolyzing) complex	1	4	0.25	0.903979	0.451547	1	1	A0A2K3E2J9_CHLRE
molecular_function	GO:0016756	glutathione gamma-glutamylcysteinyltransferase activity	1	2	0.5	0.980308	0.261068	1	1	A0A2K3DIY5_CHLRE
biological_process	GO:0098849	cellular detoxification of cadmium ion	1	2	0.5	0.980282	0.261258	1	1	A0A2K3DIY5_CHLRE
biological_process	GO:0010273	detoxification of copper ion	1	2	0.5	0.980282	0.261258	1	1	A0A2K3DIY5_CHLRE
biological_process	GO:0046938	phytochelatin biosynthetic process	1	2	0.5	0.980282	0.261258	1	1	A0A2K3DIY5_CHLRE
biological_process	GO:0042138	meiotic DNA double-strand break formation	1	4	0.25	0.902649	0.454316	1	1	A0A2K3CXW5_CHLRE
biological_process	GO:0032367	intracellular cholesterol transport	1	1	1	1	0.140488	1	1	A0A2K3DZQ0_CHLRE
biological_process	GO:1904491	protein localization to ciliary transition zone	1	2	0.5	0.980282	0.261258	1	1	A0A2K3CTH6_CHLRE
biological_process	GO:0045132	meiotic chromosome segregation	1	2	0.5	0.982742	0.0623618	1	1	A0A2K3D6T3_CHLRE
molecular_function	GO:0016316	phosphatidylinositol-3,4-bisphosphate 4-phosphatase activity	1	1	1	1	0.14038	1	1	A0A2K3CRU7_CHLRE
molecular_function	GO:0003877	ATP adenylyltransferase activity	1	1	1	1	0.14038	1	1	A0A2K3CSQ6_CHLRE
molecular_function	GO:0008796	bis(5'-nucleosyl)-tetraphosphatase activity	1	1	1	0.946444	0.364825	1	1	A0A2K3CSQ6_CHLRE
molecular_function	GO:0004780	sulfate adenylyltransferase (ADP) activity	1	1	1	1	0.14038	1	1	A0A2K3CSQ6_CHLRE
biological_process	GO:0009164	nucleoside catabolic process	1	1	1	0.687353	0.702351	1	1	A0A2K3CSQ6_CHLRE
biological_process	GO:0009165	nucleotide biosynthetic process	1	1	1	1	1.46078e-13	1	0	A0A2K3CSQ6_CHLRE
biological_process	GO:0000706	meiotic DNA double-strand break processing	1	3	0.333333	0.946376	0.365075	1	1	A0A2K3CXW5_CHLRE
biological_process	GO:0006517	protein deglycosylation	1	2	0.5	0.946376	0.365075	1	1	A0A2K3E892_CHLRE
molecular_function	GO:0004651	polynucleotide 5'-phosphatase activity	1	1	1	1	0.14038	1	1	A0A2K3DW62_CHLRE
molecular_function	GO:0005246	calcium channel regulator activity	1	3	0.333333	0.946444	0.364825	1	1	A0A2K3DPQ3_CHLRE
biological_process	GO:0032237	activation of store-operated calcium channel activity	1	3	0.333333	0.946376	0.365075	1	1	A0A2K3DPQ3_CHLRE
biological_process	GO:0002115	store-operated calcium entry	1	3	0.333333	0.946376	0.365075	1	1	A0A2K3DPQ3_CHLRE
biological_process	GO:0090522	vesicle tethering involved in exocytosis	1	3	0.333333	0.946376	0.365075	1	1	A0A2K3E4T8_CHLRE
biological_process	GO:0072598	protein localization to chloroplast	1	3	0.333333	0.768179	0.518757	1	1	A0A2K3CQW3_CHLRE
molecular_function	GO:0016597	amino acid binding	1	5	0.2	0.580068	0.779869	1	1	A0A2K3D6H0_CHLRE
molecular_function	GO:0005261	cation channel activity	1	2	0.5	0.99048	0.0193731	1	0.999	A0A2K3CUI6_CHLRE
biological_process	GO:1902975	mitotic DNA replication initiation	1	5	0.2	0.852524	0.531026	1	1	A0A2K3DIP5_CHLRE
molecular_function	GO:0047493	ceramide cholinephosphotransferase activity	1	2	0.5	0.980308	0.261068	1	1	A0A2K3DLV1_CHLRE
molecular_function	GO:0045140	inositol phosphoceramide synthase activity	1	1	1	1	0.14038	1	1	A0A2K3DLV1_CHLRE
molecular_function	GO:0033188	sphingomyelin synthase activity	1	2	0.5	0.980308	0.261068	1	1	A0A2K3DLV1_CHLRE
cellular_component	GO:0016605	PML body	1	2	0.5	0.98058	0.259395	1	1	A0A2K3DRA1_CHLRE
molecular_function	GO:0070260	5'-tyrosyl-DNA phosphodiesterase activity	1	2	0.5	0.980308	0.261068	1	1	A0A2K3DRA1_CHLRE
biological_process	GO:0030206	chondroitin sulfate biosynthetic process	1	1	1	1	0.140488	1	1	A0A2K3DBH6_CHLRE
molecular_function	GO:0008271	secondary active sulfate transmembrane transporter activity	1	3	0.333333	0.946444	0.364825	1	1	A0A2K3CQF7_CHLRE
molecular_function	GO:0016849	phosphorus-oxygen lyase activity	1	1	1	1	4.08436e-11	1	0	A0A2K3E282_CHLRE
biological_process	GO:0034421	post-translational protein acetylation	1	1	1	1	0.140488	1	1	A0A2K3D6T3_CHLRE
biological_process	GO:0006952	defense response	1	7	0.142857	0.0903699	0.98337	1	1	A0A2K3D395_CHLRE
molecular_function	GO:0008422	beta-glucosidase activity	1	3	0.333333	0.946444	0.364825	1	1	A0A2K3D3L3_CHLRE
molecular_function	GO:0052861	glucan endo-1,3-beta-glucanase activity, C-3 substituted reducing group	1	1	1	1	0.14038	1	1	A0A2K3D3L3_CHLRE
molecular_function	GO:0052862	glucan endo-1,4-beta-glucanase activity, C-3 substituted reducing group	1	1	1	1	0.14038	1	1	A0A2K3D3L3_CHLRE
biological_process	GO:0000288	nuclear-transcribed mRNA catabolic process, deadenylation-dependent decay	1	4	0.25	0.852241	0.297806	1	1	A0A2K3CYY3_CHLRE
cellular_component	GO:0033176	proton-transporting V-type ATPase complex	1	2	0.5	0.82586	0.38983	1	1	A0A2K3DCJ6_CHLRE
biological_process	GO:0010165	response to X-ray	1	1	1	0.997235	0.0536244	1	1	A0A2K3CWI5_CHLRE
molecular_function	GO:0051741	2-methyl-6-phytyl-1,4-benzoquinone methyltransferase activity	1	2	0.5	0.980308	0.261068	1	1	Q6VPQ2_CHLRE
cellular_component	GO:0042565	RNA nuclear export complex	1	2	0.5	0.98058	0.259395	1	1	A0A2K3D946_CHLRE
molecular_function	GO:0052856	NADHX epimerase activity	1	1	1	1	0.14038	1	1	A0A2K3DHV3_CHLRE
molecular_function	GO:0052857	NADPHX epimerase activity	1	1	1	1	0.14038	1	1	A0A2K3DHV3_CHLRE
molecular_function	GO:0004733	pyridoxamine-phosphate oxidase activity	1	2	0.5	0.980308	0.261068	1	1	A0A2K3DHV3_CHLRE
biological_process	GO:0033683	nucleotide-excision repair, DNA incision	1	2	0.5	0.977836	0.147476	1	1	A0A2K3DQN1_CHLRE
biological_process	GO:0007155	cell adhesion	1	4	0.25	0.990488	0.0624169	1	1	A8JD49_CHLRE
molecular_function	GO:0004127	cytidylate kinase activity	1	4	0.25	0.90277	0.454023	1	1	A8HYW3_CHLRE
cellular_component	GO:0031359	integral component of chloroplast outer membrane	1	3	0.333333	0.947147	0.362666	1	1	A0A2K3DWC6_CHLRE
molecular_function	GO:0030941	chloroplast targeting sequence binding	1	3	0.333333	0.946444	0.364825	1	1	A0A2K3DWC6_CHLRE
biological_process	GO:0034454	microtubule anchoring at centrosome	1	2	0.5	0.980282	0.261258	1	1	A0A2K3DMP2_CHLRE
molecular_function	GO:0035243	protein-arginine omega-N symmetric methyltransferase activity	1	2	0.5	0.980308	0.261068	1	1	A0A2K3D0M3_CHLRE
biological_process	GO:0006817	phosphate ion transport	1	3	0.333333	0.76005	0.473852	1	1	A0A2K3CVU6_CHLRE
biological_process	GO:0051307	meiotic chromosome separation	1	1	1	0.960257	0.201343	1	1	A0A2K3E6M0_CHLRE
biological_process	GO:0051598	meiotic recombination checkpoint signaling	1	1	1	1	0.140488	1	1	A0A2K3E3D8_CHLRE
molecular_function	GO:0003919	FMN adenylyltransferase activity	1	2	0.5	0.980308	0.261068	1	1	A0A2K3D1K2_CHLRE
molecular_function	GO:0030553	cGMP binding	1	6	0.166667	0.798893	0.596623	1	1	A0A2K3D2F6_CHLRE
molecular_function	GO:0008897	holo-[acyl-carrier-protein] synthase activity	1	2	0.5	0.980308	0.261068	1	1	A0A2K3E600_CHLRE
biological_process	GO:0019878	lysine biosynthetic process via aminoadipic acid	1	2	0.5	0.980282	0.261258	1	1	A0A2K3E600_CHLRE
molecular_function	GO:0016403	dimethylargininase activity	1	1	1	1	0.14038	1	1	A0A2K3D6H0_CHLRE
biological_process	GO:0006525	arginine metabolic process	1	1	1	0.529066	0.811132	1	1	A0A2K3D6H0_CHLRE
biological_process	GO:0000052	citrulline metabolic process	1	1	1	0.980282	0.261258	1	1	A0A2K3D6H0_CHLRE
biological_process	GO:0045429	positive regulation of nitric oxide biosynthetic process	1	1	1	1	0.140488	1	1	A0A2K3D6H0_CHLRE
molecular_function	GO:0004555	alpha,alpha-trehalase activity	1	1	1	1	0.14038	1	1	A0A2K3DYM1_CHLRE
biological_process	GO:0005991	trehalose metabolic process	1	1	1	0.980282	0.261258	1	1	A0A2K3DYM1_CHLRE
molecular_function	GO:0004314	[acyl-carrier-protein] S-malonyltransferase activity	1	3	0.333333	0.946444	0.364825	1	1	A0A2K3DB37_CHLRE
molecular_function	GO:0000987	cis-regulatory region sequence-specific DNA binding	1	2	0.5	0.996576	0.00865528	1	0.932	A0A2K3E4Z7_CHLRE
biological_process	GO:0043619	regulation of transcription from RNA polymerase II promoter in response to oxidative stress	1	1	1	1	0.140488	1	1	A0A2K3E4Z7_CHLRE
molecular_function	GO:0015301	anion:anion antiporter activity	1	2	0.5	0.632983	0.743875	1	1	A0A2K3CQF7_CHLRE
molecular_function	GO:0017128	phospholipid scramblase activity	1	4	0.25	0.90277	0.454023	1	1	A0A2K3DN38_CHLRE
biological_process	GO:0017121	plasma membrane phospholipid scrambling	1	3	0.333333	0.946376	0.365075	1	1	A0A2K3DN38_CHLRE
biological_process	GO:0006273	lagging strand elongation	1	3	0.333333	0.977836	0.147476	1	1	A0A2K3DP21_CHLRE
biological_process	GO:0008104	protein localization	1	4	0.25	0.121116	0.907272	1	1	A0A2K3E7K9_CHLRE
molecular_function	GO:0097157	pre-mRNA intronic binding	1	1	1	1	0.14038	1	1	A0A2K3E5Q8_CHLRE
molecular_function	GO:0030620	U2 snRNA binding	1	4	0.25	0.90277	0.454023	1	1	A0A2K3E5Q8_CHLRE
molecular_function	GO:0004573	Glc3Man9GlcNAc2 oligosaccharide glucosidase activity	1	2	0.5	0.980308	0.261068	1	1	A0A2K3DAZ2_CHLRE
biological_process	GO:0009311	oligosaccharide metabolic process	1	2	0.5	0.973736	0.0974972	1	1	A0A2K3DAZ2_CHLRE
molecular_function	GO:0008442	3-hydroxyisobutyrate dehydrogenase activity	1	1	1	1	0.14038	1	1	A0A2K3CYQ5_CHLRE
biological_process	GO:0006844	acyl carnitine transport	1	1	1	1	0.140488	1	1	A0A2K3CW12_CHLRE
biological_process	GO:0016180	snRNA processing	1	2	0.5	0.80724	0.470934	1	1	A0A2K3D351_CHLRE
biological_process	GO:0006482	protein demethylation	1	2	0.5	0.990488	0.0624169	1	1	A0A2K3DN88_CHLRE
biological_process	GO:0001672	regulation of chromatin assembly or disassembly	1	1	1	0.980282	0.261258	1	1	A0A2K3D8S5_CHLRE
molecular_function	GO:0016903	oxidoreductase activity, acting on the aldehyde or oxo group of donors	1	2	0.5	0.090721	0.983278	1	1	A0A2K3E1V3_CHLRE
cellular_component	GO:0031515	tRNA (m1A) methyltransferase complex	1	2	0.5	0.98058	0.259395	1	1	A0A2K3DSA0_CHLRE
cellular_component	GO:0031298	replication fork protection complex	1	3	0.333333	0.947147	0.362666	1	1	A0A2K3D2G9_CHLRE
biological_process	GO:0000076	DNA replication checkpoint signaling	1	4	0.25	0.988002	0.0564621	1	1	A0A2K3D2G9_CHLRE
biological_process	GO:0043111	replication fork arrest	1	2	0.5	0.980282	0.261258	1	1	A0A2K3D2G9_CHLRE
biological_process	GO:0005990	lactose catabolic process	1	1	1	1	0.140488	1	1	A0A2K3DHX9_CHLRE
molecular_function	GO:0070204	2-succinyl-5-enolpyruvyl-6-hydroxy-3-cyclohexene-1-carboxylic-acid synthase activity	1	1	1	1	0.14038	1	1	A0A2K3CTE4_CHLRE
molecular_function	GO:0102193	protein-ribulosamine 3-kinase activity	1	1	1	1	0.14038	1	1	A0A2K3D715_CHLRE
molecular_function	GO:0047325	inositol tetrakisphosphate 1-kinase activity	1	3	0.333333	0.946444	0.364825	1	1	A0A2K3DXV5_CHLRE
molecular_function	GO:0052726	inositol-1,3,4-trisphosphate 5-kinase activity	1	3	0.333333	0.946444	0.364825	1	1	A0A2K3DXV5_CHLRE
molecular_function	GO:0052725	inositol-1,3,4-trisphosphate 6-kinase activity	1	3	0.333333	0.946444	0.364825	1	1	A0A2K3DXV5_CHLRE
biological_process	GO:0032957	inositol trisphosphate metabolic process	1	3	0.333333	0.946376	0.365075	1	1	A0A2K3DXV5_CHLRE
molecular_function	GO:0004143	diacylglycerol kinase activity	1	2	0.5	0.980308	0.261068	1	1	A0A2K3DIF0_CHLRE
biological_process	GO:0007205	protein kinase C-activating G protein-coupled receptor signaling pathway	1	2	0.5	0.980282	0.261258	1	1	A0A2K3DIF0_CHLRE
molecular_function	GO:0035368	selenocysteine insertion sequence binding	1	2	0.5	0.980308	0.261068	1	1	A0A2K3DWP4_CHLRE
molecular_function	GO:0106073	dolichyl pyrophosphate Glc2Man9GlcNAc2 alpha-1,2-glucosyltransferase activity	1	1	1	1	0.14038	1	1	A0A2K3E7F7_CHLRE
molecular_function	GO:0019902	phosphatase binding	1	2	0.5	0.910428	0.312306	1	1	A0A2K3DUB7_CHLRE
cellular_component	GO:0032592	integral component of mitochondrial membrane	1	4	0.25	0.841515	0.33478	1	1	A0A2K3DVN1_CHLRE
molecular_function	GO:0016807	cysteine-type carboxypeptidase activity	1	1	1	1	0.14038	1	1	A0A2K3DR81_CHLRE
molecular_function	GO:1990380	Lys48-specific deubiquitinase activity	1	2	0.5	0.980308	0.261068	1	1	A0A2K3DR81_CHLRE
molecular_function	GO:0008810	cellulase activity	1	3	0.333333	0.946444	0.364825	1	1	A0A2K3CQY0_CHLRE
biological_process	GO:0030245	cellulose catabolic process	1	3	0.333333	0.946376	0.365075	1	1	A0A2K3CQY0_CHLRE
molecular_function	GO:0003825	alpha,alpha-trehalose-phosphate synthase (UDP-forming) activity	1	1	1	1	0.14038	1	1	A0A2K3CUQ3_CHLRE
molecular_function	GO:0015419	ABC-type sulfate transporter activity	1	3	0.333333	0.946444	0.364825	1	1	Q6QJE0_CHLRE
biological_process	GO:0044030	regulation of DNA methylation	1	1	1	1	0.140488	1	1	A0A2K3CSQ1_CHLRE
biological_process	GO:0051306	mitotic sister chromatid separation	1	1	1	0.963753	0.121997	1	1	A0A2K3DFH1_CHLRE
molecular_function	GO:0017005	3'-tyrosyl-DNA phosphodiesterase activity	1	1	1	1	0.14038	1	1	A0A2K3E874_CHLRE
cellular_component	GO:0035101	FACT complex	1	3	0.333333	0.947147	0.362666	1	1	A0A2K3D701_CHLRE
biological_process	GO:0035552	oxidative single-stranded DNA demethylation	1	3	0.333333	0.946376	0.365075	1	1	A0A2K3DVE4_CHLRE
biological_process	GO:0009395	phospholipid catabolic process	1	4	0.25	0.579643	0.780205	1	1	A0A2K3DX20_CHLRE
biological_process	GO:0048208	COPII vesicle coating	1	1	1	0.946376	0.365075	1	1	A0A2K3E5D5_CHLRE
biological_process	GO:0006282	regulation of DNA repair	1	1	1	0.977836	0.147476	1	1	A0A2K3DZ58_CHLRE
molecular_function	GO:0046556	alpha-L-arabinofuranosidase activity	1	3	0.333333	0.946444	0.364825	1	1	A0A2K3DWJ1_CHLRE
molecular_function	GO:0016429	tRNA (adenine-N1-)-methyltransferase activity	1	1	1	1	0.14038	1	1	A0A2K3DSA0_CHLRE
biological_process	GO:0071897	DNA biosynthetic process	1	2	0.5	0.99451	0.0204669	1	1	A0A2K3DYD9_CHLRE
biological_process	GO:0006266	DNA ligation	1	2	0.5	0.902649	0.454316	1	1	A0A2K3DP21_CHLRE
molecular_function	GO:0008659	(3R)-hydroxymyristoyl-[acyl-carrier-protein] dehydratase activity	1	2	0.5	0.980308	0.261068	1	1	A0A2K3DB37_CHLRE
molecular_function	GO:0008693	3-hydroxydecanoyl-[acyl-carrier-protein] dehydratase activity	1	2	0.5	0.980308	0.261068	1	1	A0A2K3DB37_CHLRE
molecular_function	GO:0047451	3-hydroxyoctanoyl-[acyl-carrier-protein] dehydratase activity	1	2	0.5	0.980308	0.261068	1	1	A0A2K3DB37_CHLRE
molecular_function	GO:0004317	3-hydroxypalmitoyl-[acyl-carrier-protein] dehydratase activity	1	2	0.5	0.980308	0.261068	1	1	A0A2K3DB37_CHLRE
molecular_function	GO:0004313	[acyl-carrier-protein] S-acetyltransferase activity	1	1	1	1	0.14038	1	1	A0A2K3DB37_CHLRE
biological_process	GO:0046373	L-arabinose metabolic process	1	2	0.5	0.980282	0.261258	1	1	A0A2K3DWJ1_CHLRE
molecular_function	GO:0004478	methionine adenosyltransferase activity	1	1	1	1	0.14038	1	1	A0A2K3DLX7_CHLRE
biological_process	GO:0006556	S-adenosylmethionine biosynthetic process	1	1	1	1	0.140488	1	1	A0A2K3DLX7_CHLRE
cellular_component	GO:0005879	axonemal microtubule	1	2	0.5	0.98058	0.259395	1	1	A0A2K3DH40_CHLRE
biological_process	GO:0006307	DNA dealkylation involved in DNA repair	1	2	0.5	0.980282	0.261258	1	1	A0A2K3DVE4_CHLRE
cellular_component	GO:0032021	NELF complex	1	1	1	1	0.139407	1	1	A0A2K3DY54_CHLRE
biological_process	GO:0034244	negative regulation of transcription elongation from RNA polymerase II promoter	1	1	1	1	0.140488	1	1	A0A2K3DY54_CHLRE
molecular_function	GO:0035598	N6-threonylcarbomyladenosine methylthiotransferase activity	1	1	1	1	0.14038	1	1	A0A2K3DVK1_CHLRE
molecular_function	GO:0061712	tRNA (N(6)-L-threonylcarbamoyladenosine(37)-C(2))-methylthiotransferase	1	1	1	1	0.14038	1	1	A0A2K3DVK1_CHLRE
biological_process	GO:0035600	tRNA methylthiolation	1	2	0.5	0.980282	0.261258	1	1	A0A2K3DVK1_CHLRE
molecular_function	GO:0008240	tripeptidyl-peptidase activity	1	1	1	1	0.14038	1	1	A0A2K3CVF8_CHLRE
cellular_component	GO:0000333	telomerase catalytic core complex	1	1	1	1	0.139407	1	1	A0A2K3DTX9_CHLRE
molecular_function	GO:0003721	telomerase RNA reverse transcriptase activity	1	1	1	1	0.14038	1	1	A0A2K3DTX9_CHLRE
cellular_component	GO:0055038	recycling endosome membrane	1	1	1	1	0.139407	1	1	A0A2K3E134_CHLRE
cellular_component	GO:0030658	transport vesicle membrane	1	1	1	0.967039	0.0846299	1	1	A0A2K3E134_CHLRE
molecular_function	GO:0031071	cysteine desulfurase activity	1	2	0.5	0.980308	0.261068	1	1	A0A2K3D4F5_CHLRE
molecular_function	GO:0019156	isoamylase activity	1	2	0.5	0.980308	0.261068	1	1	A0A2K3DZS6_CHLRE
molecular_function	GO:0008143	poly(A) binding	1	3	0.333333	0.946444	0.364825	1	1	A0A2K3DE16_CHLRE
molecular_function	GO:0008266	poly(U) RNA binding	1	2	0.5	0.980308	0.261068	1	1	A0A2K3DE16_CHLRE
molecular_function	GO:0001733	galactosylceramide sulfotransferase activity	1	1	1	1	0.14038	1	1	A0A2K3D7P8_CHLRE
molecular_function	GO:0003968	RNA-directed 5'-3' RNA polymerase activity	1	1	1	1	0.14038	1	1	A0A2K3DYZ3_CHLRE
biological_process	GO:0034724	DNA replication-independent chromatin organization	1	1	1	0.902649	0.454316	1	1	A0A2K3D701_CHLRE
cellular_component	GO:0035097	histone methyltransferase complex	1	2	0.5	0.583738	0.777367	1	1	A0A2K3CP13_CHLRE
molecular_function	GO:0042800	histone methyltransferase activity (H3-K4 specific)	1	2	0.5	0.980308	0.261068	1	1	A0A2K3CP13_CHLRE
biological_process	GO:0007029	endoplasmic reticulum organization	1	2	0.5	0.687353	0.702351	1	1	A8J5T5_CHLRE
molecular_function	GO:0042171	lysophosphatidic acid acyltransferase activity	1	1	1	0.946444	0.364825	1	1	A0A2K3E4S1_CHLRE
molecular_function	GO:0090599	alpha-glucosidase activity	1	1	1	1	0.14038	1	1	A0A2K3DYA8_CHLRE
molecular_function	GO:0004930	G protein-coupled receptor activity	1	1	1	0.90277	0.454023	1	1	A0A2K3D5Y5_CHLRE
molecular_function	GO:0004049	anthranilate synthase activity	1	1	1	1	0.14038	1	1	A0A2K3DRC8_CHLRE
molecular_function	GO:0004479	methionyl-tRNA formyltransferase activity	1	2	0.5	0.980308	0.261068	1	1	A0A2K3D5I7_CHLRE
biological_process	GO:0071951	conversion of methionyl-tRNA to N-formyl-methionyl-tRNA	1	2	0.5	0.980282	0.261258	1	1	A0A2K3D5I7_CHLRE
biological_process	GO:0010256	endomembrane system organization	1	1	1	0.929908	0.152637	1	1	A0A2K3DIH4_CHLRE
molecular_function	GO:0019136	deoxynucleoside kinase activity	1	1	1	1	0.0196922	1	1	A0A2K3E1X5_CHLRE
cellular_component	GO:0042175	nuclear outer membrane-endoplasmic reticulum membrane network	1	1	1	1.79144e-05	0.999996	0.001	1	A0A2K3D8I4_CHLRE
biological_process	GO:0008298	intracellular mRNA localization	1	1	1	1	0.140488	1	1	A0A2K3D8I4_CHLRE
biological_process	GO:0000738	DNA catabolic process, exonucleolytic	1	1	1	1	0.140488	1	1	A0A2K3DT50_CHLRE
molecular_function	GO:0004846	urate oxidase activity	1	1	1	1	0.14038	1	1	A0A2K3D311_CHLRE
biological_process	GO:0006145	purine nucleobase catabolic process	1	2	0.5	0.902649	0.454316	1	1	A0A2K3D311_CHLRE
biological_process	GO:0019628	urate catabolic process	1	1	1	1	0.140488	1	1	A0A2K3D311_CHLRE
biological_process	GO:1904430	negative regulation of t-circle formation	1	1	1	1	0.140488	1	1	A0A2K3E158_CHLRE
biological_process	GO:0010569	regulation of double-strand break repair via homologous recombination	1	1	1	1	0.140488	1	1	A0A2K3E158_CHLRE
biological_process	GO:0090657	telomeric loop disassembly	1	1	1	1	0.140488	1	1	A0A2K3E158_CHLRE
cellular_component	GO:0016035	zeta DNA polymerase complex	1	2	0.5	0.98058	0.259395	1	1	A0A2K3DDR6_CHLRE
molecular_function	GO:0008239	dipeptidyl-peptidase activity	1	2	0.5	0.980308	0.261068	1	1	A0A2K3CZE2_CHLRE
cellular_component	GO:0032039	integrator complex	1	1	1	1	0.139407	1	1	A0A2K3D351_CHLRE
biological_process	GO:0006534	cysteine metabolic process	1	1	1	0.355991	0.897054	1	1	A0A2K3D4F5_CHLRE
molecular_function	GO:0015087	cobalt ion transmembrane transporter activity	1	2	0.5	0.980308	0.261068	1	1	A0A2K3CZ59_CHLRE
biological_process	GO:0008285	negative regulation of cell population proliferation	1	1	1	1	0.140488	1	1	A0A2K3DQM4_CHLRE
cellular_component	GO:0000775	chromosome, centromeric region	1	1	1	0.938492	0.158485	1	1	A0A2K3CW19_CHLRE
biological_process	GO:0006516	glycoprotein catabolic process	1	2	0.5	0.946376	0.365075	1	1	A0A2K3E892_CHLRE
biological_process	GO:0043547	positive regulation of GTPase activity	1	1	1	0.727882	0.563601	1	1	A0A2K3DUS6_CHLRE
molecular_function	GO:0004797	thymidine kinase activity	1	1	1	1	0.14038	1	1	A0A2K3DYD9_CHLRE
biological_process	GO:0046104	thymidine metabolic process	1	1	1	1	0.140488	1	1	A0A2K3DYD9_CHLRE
cellular_component	GO:0000112	nucleotide-excision repair factor 3 complex	1	1	1	1	0.139407	1	1	A0A2K3DQN1_CHLRE
molecular_function	GO:0000224	peptide-N4-(N-acetyl-beta-glucosaminyl)asparagine amidase activity	1	1	1	1	0.14038	1	1	A0A2K3E892_CHLRE
biological_process	GO:0034477	U6 snRNA 3'-end processing	1	1	1	1	0.140488	1	1	A0A2K3E7G4_CHLRE
molecular_function	GO:0070579	methylcytosine dioxygenase activity	1	1	1	1	0.14038	1	1	A0A2K3DS01_CHLRE
biological_process	GO:0080111	DNA demethylation	1	1	1	0.990103	0.0973513	1	1	A0A2K3DS01_CHLRE
cellular_component	GO:0005663	DNA replication factor C complex	1	5	0.2	0.854435	0.528043	1	1	A0A2K3D450_CHLRE
cellular_component	GO:0036156	inner dynein arm	1	1	1	1	0.139407	1	1	A8J3B6_CHLRE
biological_process	GO:0010091	trichome branching	1	1	1	1	0.140488	1	1	A8IAJ1_CHLRE
molecular_function	GO:0003689	DNA clamp loader activity	1	1	1	1	0.14038	1	1	A0A2K3D450_CHLRE
molecular_function	GO:0070300	phosphatidic acid binding	1	1	1	1	0.14038	1	1	A0A2K3E0M1_CHLRE
biological_process	GO:0034196	acylglycerol transport	1	1	1	1	0.140488	1	1	A0A2K3E0M1_CHLRE
biological_process	GO:1990052	ER to chloroplast lipid transport	1	1	1	1	0.140488	1	1	A0A2K3E0M1_CHLRE
biological_process	GO:0034470	ncRNA processing	1	1	1	0.0228482	0.984928	0.987	1	A0A2K3DKK4_CHLRE
molecular_function	GO:0009882	blue light photoreceptor activity	0	3	0	0.635175	1	1	1
biological_process	GO:0009785	blue light signaling pathway	0	1	0	0.859512	1	1	1
molecular_function	GO:0016984	ribulose-bisphosphate carboxylase activity	0	1	0	0.85962	1	1	1
biological_process	GO:0009853	photorespiration	0	5	0	0.403037	1	1	1
biological_process	GO:0019253	reductive pentose-phosphate cycle	0	3	0	0.545684	1	1	1
cellular_component	GO:0009539	photosystem II reaction center	0	8	0	0.300705	1	1	1
cellular_component	GO:0005762	mitochondrial large ribosomal subunit	0	19	0	0.0575025	1	0.992	1
cellular_component	GO:0005840	ribosome	0	62	0	3.53334e-10	1	0	1
molecular_function	GO:0019843	rRNA binding	0	34	0	0.00181185	0.999825	0.173	1
cellular_component	GO:0015935	small ribosomal subunit	0	20	0	0.00421051	0.999261	0.224	1
molecular_function	GO:0004037	allantoicase activity	0	1	0	0.85962	1	1	1
biological_process	GO:0000256	allantoin catabolic process	0	2	0	0.738742	1	1	1
biological_process	GO:0006144	purine nucleobase metabolic process	0	2	0	0.394643	0.880184	1	1
molecular_function	GO:0045158	electron transporter, transferring electrons within cytochrome b6/f complex of photosystem II activity	0	5	0	0.469296	1	1	1
biological_process	GO:0022904	respiratory electron transport chain	0	3	0	0.079978	0.985716	1	1
cellular_component	GO:0005753	mitochondrial proton-transporting ATP synthase complex	0	2	0	0.583738	0.777367	1	1
biological_process	GO:0042776	mitochondrial ATP synthesis coupled proton transport	0	4	0	0.468974	1	1	1
molecular_function	GO:0003746	translation elongation factor activity	0	24	0	0.0263638	1	0.949	1
biological_process	GO:0070125	mitochondrial translational elongation	0	5	0	0.468974	1	1	1
biological_process	GO:0006414	translational elongation	0	12	0	0.323232	0.847321	1	1
cellular_component	GO:0031361	integral component of thylakoid membrane	0	1	0	0.860593	1	1	1
biological_process	GO:0017004	cytochrome complex assembly	0	5	0	0.0910837	0.974273	1	1
biological_process	GO:0015886	heme transport	0	1	0	0.859512	1	1	1
molecular_function	GO:0008962	phosphatidylglycerophosphatase activity	0	1	0	0.85962	1	1	1
biological_process	GO:0009658	chloroplast organization	0	6	0	0.188868	1	1	1
biological_process	GO:0046486	glycerolipid metabolic process	0	1	0	0.0341529	0.987175	0.999	1
biological_process	GO:0006655	phosphatidylglycerol biosynthetic process	0	1	0	0.634925	1	1	1
biological_process	GO:0046839	phospholipid dephosphorylation	0	2	0	0.632597	0.74422	1	1
cellular_component	GO:0043253	chloroplast ribosome	0	1	0	0.860593	1	1	1
molecular_function	GO:1905538	polysome binding	0	2	0	0.738932	1	1	1
molecular_function	GO:0061770	translation elongation factor binding	0	1	0	0.85962	1	1	1
biological_process	GO:0009416	response to light stimulus	0	25	0	0.00204853	0.9998	0.29	1
molecular_function	GO:0008812	choline dehydrogenase activity	0	1	0	0.85962	1	1	1
molecular_function	GO:0016829	lyase activity	0	4	0	0.995989	0.00668309	1	0.885
biological_process	GO:0019285	glycine betaine biosynthetic process from choline	0	1	0	0.859512	1	1	1
biological_process	GO:0032543	mitochondrial translation	0	11	0	0.0305476	1	0.998	1
molecular_function	GO:0016682	oxidoreductase activity, acting on diphenols and related substances as donors, oxygen as acceptor	0	1	0	0.852702	0.530704	1	1
biological_process	GO:0009635	response to herbicide	0	2	0	0.738742	1	1	1
cellular_component	GO:0000275	mitochondrial proton-transporting ATP synthase complex, catalytic sector F(1)	0	5	0	0.471957	1	1	1
molecular_function	GO:0003973	(S)-2-hydroxy-acid oxidase activity	0	2	0	0.738932	1	1	1
biological_process	GO:0009854	oxidative photosynthetic carbon pathway	0	1	0	0.859512	1	1	1
cellular_component	GO:0009522	photosystem I	0	34	0	0.00242768	1	0.127	1
biological_process	GO:0010196	nonphotochemical quenching	0	35	0	0.00492246	1	0.545	1
biological_process	GO:0009765	photosynthesis, light harvesting	0	3	0	0.0624786	0.989463	1	1
biological_process	GO:0009644	response to high light intensity	0	4	0	0.468974	1	1	1
biological_process	GO:0080183	response to photooxidative stress	0	4	0	0.545684	1	1	1
biological_process	GO:0000028	ribosomal small subunit assembly	0	17	0	0.0652877	1	1	1
cellular_component	GO:0009512	cytochrome b6f complex	0	4	0	0.548453	1	1	1
molecular_function	GO:0048027	mRNA 5'-UTR binding	0	3	0	0.635175	1	1	1
molecular_function	GO:0070181	small ribosomal subunit rRNA binding	0	10	0	0.220131	1	1	1
cellular_component	GO:0009654	photosystem II oxygen evolving complex	0	17	0	0.0776948	1	1	1
biological_process	GO:0042549	photosystem II stabilization	0	2	0	0.738742	1	1	1
biological_process	GO:0045903	positive regulation of translational fidelity	0	3	0	0.634925	1	1	1
biological_process	GO:0046677	response to antibiotic	0	3	0	0.634925	1	1	1
biological_process	GO:0009767	photosynthetic electron transport chain	0	4	0	0.436399	0.860554	1	1
biological_process	GO:0019684	photosynthesis, light reaction	0	1	0	0.0189079	0.995961	0.95	1
biological_process	GO:0048564	photosystem I assembly	0	4	0	0.545684	1	1	1
biological_process	GO:0009773	photosynthetic electron transport in photosystem I	0	5	0	0.468974	1	1	1
molecular_function	GO:0042301	phosphate ion binding	0	1	0	0.85962	1	1	1
biological_process	GO:0050821	protein stabilization	0	8	0	0.297649	1	1	1
cellular_component	GO:0101031	chaperone complex	0	1	0	0.636397	0.741256	1	1
biological_process	GO:0110102	ribulose bisphosphate carboxylase complex assembly	0	3	0	0.634925	1	1	1
cellular_component	GO:0042651	thylakoid membrane	0	5	0	0.000552028	0.999861	0.033	1
biological_process	GO:0009768	photosynthesis, light harvesting in photosystem I	0	23	0	0.0305476	1	0.998	1
cellular_component	GO:0009706	chloroplast inner membrane	0	19	0	0.0494676	1	0.972	1
biological_process	GO:0030163	protein catabolic process	0	2	0	0.0185556	0.988333	0.947	1
cellular_component	GO:0120293	dynein axonemal particle	0	3	0	0.637334	1	1	1
biological_process	GO:0070286	axonemal dynein complex assembly	0	5	0	0.883211	0.272793	1	1
molecular_function	GO:0120204	methylcytosine to 5-glyceryl-methylcytosine dioxygenase activity	0	1	0	0.85962	1	1	1
biological_process	GO:0010109	regulation of photosynthesis	0	1	0	0.545684	1	1	1
biological_process	GO:0016120	carotene biosynthetic process	0	2	0	0.738742	1	1	1
biological_process	GO:0006744	ubiquinone biosynthetic process	0	12	0	0.102946	1	1	1
biological_process	GO:0016123	xanthophyll biosynthetic process	0	4	0	0.545684	1	1	1
biological_process	GO:0032981	mitochondrial respiratory chain complex I assembly	0	12	0	0.162289	1	1	1
molecular_function	GO:0004435	phosphatidylinositol phospholipase C activity	0	1	0	0.85962	1	1	1
biological_process	GO:0048015	phosphatidylinositol-mediated signaling	0	4	0	0.545684	1	1	1
molecular_function	GO:0005200	structural constituent of cytoskeleton	0	8	0	0.297998	1	1	1
molecular_function	GO:0061631	ubiquitin conjugating enzyme activity	0	18	0	0.0654961	1	1	1
biological_process	GO:0000209	protein polyubiquitination	0	41	0	0.000790261	1	0.106	1
molecular_function	GO:0030151	molybdenum ion binding	0	4	0	0.545977	1	1	1
molecular_function	GO:0043546	molybdopterin cofactor binding	0	2	0	0.738932	1	1	1
molecular_function	GO:0009703	nitrate reductase (NADH) activity	0	1	0	0.85962	1	1	1
molecular_function	GO:0050464	nitrate reductase (NADPH) activity	0	1	0	0.85962	1	1	1
biological_process	GO:0042128	nitrate assimilation	0	5	0	0.468974	1	1	1
biological_process	GO:0006809	nitric oxide biosynthetic process	0	1	0	0.980282	0.261258	1	1
biological_process	GO:0010608	posttranscriptional regulation of gene expression	0	4	0	0.900981	0.143011	1	1
biological_process	GO:0070507	regulation of microtubule cytoskeleton organization	0	4	0	0.924421	0.231821	1	1
cellular_component	GO:0005685	U1 snRNP	0	14	0	0.122007	1	1	1
cellular_component	GO:0005686	U2 snRNP	0	17	0	0.0776948	1	1	1
biological_process	GO:0000387	spliceosomal snRNP assembly	0	13	0	0.565132	0.712234	1	1
molecular_function	GO:0070006	metalloaminopeptidase activity	0	12	0	0.162598	1	1	1
biological_process	GO:0070084	protein initiator methionine removal	0	3	0	0.634925	1	1	1
biological_process	GO:0006241	CTP biosynthetic process	0	5	0	0.346362	1	1	1
biological_process	GO:0006183	GTP biosynthetic process	0	5	0	0.468974	1	1	1
biological_process	GO:0006228	UTP biosynthetic process	0	4	0	0.545684	1	1	1
molecular_function	GO:0008836	diaminopimelate decarboxylase activity	0	2	0	0.738932	1	1	1
cellular_component	GO:0097361	CIA complex	0	2	0	0.740605	1	1	1
molecular_function	GO:0016758	hexosyltransferase activity	0	8	0	0.124349	0.931095	1	1
molecular_function	GO:0008194	UDP-glycosyltransferase activity	0	7	0	0.191291	0.912239	1	1
biological_process	GO:0030259	lipid glycosylation	0	2	0	0.738742	1	1	1
molecular_function	GO:0008301	DNA binding, bending	0	6	0	0.403377	1	1	1
cellular_component	GO:0060170	ciliary membrane	0	3	0	0.637334	1	1	1
biological_process	GO:0032880	regulation of protein localization	0	1	0	0.990103	0.0973513	1	1
molecular_function	GO:0070492	oligosaccharide binding	0	1	0	0.85962	1	1	1
molecular_function	GO:0004527	exonuclease activity	0	8	0	0.810613	0.289462	1	1
molecular_function	GO:0005375	copper ion transmembrane transporter activity	0	4	0	0.403377	1	1	1
biological_process	GO:0006878	cellular copper ion homeostasis	0	5	0	0.468974	1	1	1
molecular_function	GO:0004824	lysine-tRNA ligase activity	0	2	0	0.738932	1	1	1
biological_process	GO:0006430	lysyl-tRNA aminoacylation	0	2	0	0.738742	1	1	1
molecular_function	GO:0015662	P-type ion transporter activity	0	5	0	0.0762173	1	1	1
molecular_function	GO:0008553	P-type proton-exporting transporter activity	0	3	0	0.635175	1	1	1
biological_process	GO:0034220	ion transmembrane transport	0	10	0	0.695818	0.38569	1	1
biological_process	GO:0120029	proton export across plasma membrane	0	3	0	0.634925	1	1	1
molecular_function	GO:0103012	ferredoxin-thioredoxin reductase activity	0	1	0	0.85962	1	1	1
molecular_function	GO:0102067	geranylgeranyl diphosphate reductase activity	0	1	0	0.85962	1	1	1
molecular_function	GO:0045550	geranylgeranyl reductase activity	0	1	0	0.85962	1	1	1
cellular_component	GO:0035859	Seh1-associated complex	0	1	0	0.860593	1	1	1
biological_process	GO:0034198	cellular response to amino acid starvation	0	1	0	0.859512	1	1	1
biological_process	GO:1904263	positive regulation of TORC1 signaling	0	2	0	0.738742	1	1	1
cellular_component	GO:0030956	glutamyl-tRNA(Gln) amidotransferase complex	0	3	0	0.637334	1	1	1
molecular_function	GO:0050567	glutaminyl-tRNA synthase (glutamine-hydrolyzing) activity	0	3	0	0.635175	1	1	1
biological_process	GO:0070681	glutaminyl-tRNAGln biosynthesis via transamidation	0	3	0	0.634925	1	1	1
cellular_component	GO:0010494	cytoplasmic stress granule	0	5	0	0.471957	1	1	1
biological_process	GO:0034063	stress granule assembly	0	5	0	0.468974	1	1	1
molecular_function	GO:0003838	sterol 24-C-methyltransferase activity	0	3	0	0.635175	1	1	1
biological_process	GO:0016126	sterol biosynthetic process	0	9	0	0.25578	1	1	1
biological_process	GO:0000054	ribosomal subunit export from nucleus	0	3	0	0.529066	0.811132	1	1
molecular_function	GO:0004190	aspartic-type endopeptidase activity	0	8	0	0.189192	1	1	1
molecular_function	GO:0031593	polyubiquitin modification-dependent protein binding	0	14	0	0.526723	0.741522	1	1
biological_process	GO:0045454	cell redox homeostasis	0	33	0	0.00667463	1	0.668	1
molecular_function	GO:0004129	cytochrome-c oxidase activity	0	3	0	0.635175	1	1	1
biological_process	GO:0042773	ATP synthesis coupled electron transport	0	4	0	0.145849	0.969452	1	1
molecular_function	GO:0008685	2-C-methyl-D-erythritol 2,4-cyclodiphosphate synthase activity	0	1	0	0.85962	1	1	1
biological_process	GO:0019288	isopentenyl diphosphate biosynthetic process, methylerythritol 4-phosphate pathway	0	3	0	0.545684	1	1	1
biological_process	GO:0016114	terpenoid biosynthetic process	0	4	0	0.0413954	1	1	1
molecular_function	GO:0003871	5-methyltetrahydropteroyltriglutamate-homocysteine S-methyltransferase activity	0	1	0	0.85962	1	1	1
biological_process	GO:0009086	methionine biosynthetic process	0	8	0	0.139446	1	1	1
molecular_function	GO:0004109	coproporphyrinogen oxidase activity	0	3	0	0.635175	1	1	1
molecular_function	GO:0003978	UDP-glucose 4-epimerase activity	0	2	0	0.738932	1	1	1
biological_process	GO:0006012	galactose metabolic process	0	5	0	0.403037	1	1	1
biological_process	GO:0030162	regulation of proteolysis	0	16	0	0.0198565	0.997324	0.968	1
cellular_component	GO:0031597	cytosolic proteasome complex	0	3	0	0.406123	1	1	1
cellular_component	GO:0016282	eukaryotic 43S preinitiation complex	0	10	0	0.222633	1	1	1
cellular_component	GO:0033290	eukaryotic 48S preinitiation complex	0	11	0	0.191559	1	1	1
cellular_component	GO:0005852	eukaryotic translation initiation factor 3 complex	0	10	0	0.141808	1	1	1
cellular_component	GO:0071540	eukaryotic translation initiation factor 3 complex, eIF3e	0	2	0	0.740605	1	1	1
molecular_function	GO:0030371	translation repressor activity	0	1	0	0.85962	1	1	1
biological_process	GO:0001732	formation of cytoplasmic translation initiation complex	0	12	0	0.162289	1	1	1
biological_process	GO:0009640	photomorphogenesis	0	2	0	0.545684	1	1	1
biological_process	GO:0006413	translational initiation	0	10	0	0.0486536	0.992228	1	1
cellular_component	GO:0071014	post-mRNA release spliceosomal complex	0	9	0	0.222633	1	1	1
cellular_component	GO:0071020	post-spliceosomal complex	0	1	0	0.740605	1	1	1
cellular_component	GO:0000974	Prp19 complex	0	9	0	0.258744	1	1	1
biological_process	GO:0000350	generation of catalytic spliceosome for second transesterification step	0	2	0	0.738742	1	1	1
biological_process	GO:0000389	mRNA 3'-splice site recognition	0	1	0	0.859512	1	1	1
biological_process	GO:0043448	alkane catabolic process	0	1	0	0.859512	1	1	1
molecular_function	GO:0004310	farnesyl-diphosphate farnesyltransferase activity	0	1	0	0.85962	1	1	1
molecular_function	GO:0051996	squalene synthase activity	0	1	0	0.85962	1	1	1
biological_process	GO:0045338	farnesyl diphosphate metabolic process	0	1	0	0.634925	1	1	1
molecular_function	GO:0004740	pyruvate dehydrogenase (acetyl-transferring) kinase activity	0	3	0	0.635175	1	1	1
biological_process	GO:0010906	regulation of glucose metabolic process	0	3	0	0.545684	1	1	1
cellular_component	GO:0005749	mitochondrial respiratory chain complex II, succinate dehydrogenase complex (ubiquinone)	0	2	0	0.740605	1	1	1
molecular_function	GO:0016627	oxidoreductase activity, acting on the CH-CH group of donors	0	6	0	0.0040859	0.999565	0.33	1
biological_process	GO:0006121	mitochondrial electron transport, succinate to ubiquinone	0	3	0	0.634925	1	1	1
biological_process	GO:0006688	glycosphingolipid biosynthetic process	0	5	0	0.346362	1	1	1
molecular_function	GO:0005381	iron ion transmembrane transporter activity	0	4	0	0.469296	1	1	1
molecular_function	GO:0005384	manganese ion transmembrane transporter activity	0	10	0	0.220131	1	1	1
biological_process	GO:0030026	cellular manganese ion homeostasis	0	2	0	0.738742	1	1	1
biological_process	GO:0006880	intracellular sequestering of iron ion	0	4	0	0.545684	1	1	1
molecular_function	GO:0004471	malate dehydrogenase (decarboxylating) (NAD+) activity	0	7	0	0.34671	1	1	1
molecular_function	GO:0004473	malate dehydrogenase (decarboxylating) (NADP+) activity	0	5	0	0.469296	1	1	1
molecular_function	GO:0004470	malic enzyme activity	0	6	0	0.34671	1	1	1
molecular_function	GO:0008948	oxaloacetate decarboxylase activity	0	2	0	0.738932	1	1	1
biological_process	GO:0006108	malate metabolic process	0	12	0	0.162289	1	1	1
cellular_component	GO:0031304	intrinsic component of mitochondrial inner membrane	0	1	0	0.82586	0.38983	1	1
molecular_function	GO:0043727	5-amino-4-imidazole carboxylate lyase activity	0	2	0	0.738932	1	1	1
molecular_function	GO:0004638	phosphoribosylaminoimidazole carboxylase activity	0	2	0	0.738932	1	1	1
biological_process	GO:0006189	'de novo' IMP biosynthetic process	0	11	0	0.188868	1	1	1
cellular_component	GO:0005736	RNA polymerase I complex	0	11	0	0.191559	1	1	1
biological_process	GO:0006360	transcription by RNA polymerase I	0	2	0	0.579643	0.780205	1	1
biological_process	GO:0042797	tRNA transcription by RNA polymerase III	0	1	0	0.859512	1	1	1
molecular_function	GO:0008483	transaminase activity	0	11	0	0.0627684	0.989395	1	1
biological_process	GO:0009058	biosynthetic process	0	23	0	0.889737	0.125523	1	1
biological_process	GO:0006520	cellular amino acid metabolic process	0	9	0	1.99872e-05	0.999994	0.003	1
cellular_component	GO:0042765	GPI-anchor transamidase complex	0	5	0	0.471957	1	1	1
biological_process	GO:0016255	attachment of GPI anchor to protein	0	5	0	0.468974	1	1	1
biological_process	GO:0034394	protein localization to cell surface	0	2	0	0.738742	1	1	1
molecular_function	GO:0030332	cyclin binding	0	7	0	0.34671	1	1	1
biological_process	GO:0008356	asymmetric cell division	0	1	0	0.859512	1	1	1
biological_process	GO:0000082	G1/S transition of mitotic cell cycle	0	6	0	0.297649	1	1	1
biological_process	GO:0010235	guard mother cell cytokinesis	0	1	0	0.859512	1	1	1
biological_process	GO:0010444	guard mother cell differentiation	0	1	0	0.859512	1	1	1
biological_process	GO:0033206	meiotic cytokinesis	0	1	0	0.859512	1	1	1
biological_process	GO:0008284	positive regulation of cell population proliferation	0	2	0	0.738742	1	1	1
biological_process	GO:1902806	regulation of cell cycle G1/S phase transition	0	1	0	0.634925	1	1	1
biological_process	GO:0010389	regulation of G2/M transition of mitotic cell cycle	0	6	0	0.937638	0.177624	1	1
biological_process	GO:0051445	regulation of meiotic cell cycle	0	5	0	0.743087	0.653638	1	1
biological_process	GO:0040020	regulation of meiotic nuclear division	0	1	0	0.980282	0.261258	1	1
biological_process	GO:0009409	response to cold	0	5	0	0.468974	1	1	1
biological_process	GO:0098725	symmetric cell division	0	1	0	0.859512	1	1	1
cellular_component	GO:0031461	cullin-RING ubiquitin ligase complex	0	6	0	0.263903	0.839166	1	1
molecular_function	GO:0097602	cullin family protein binding	0	6	0	0.403377	1	1	1
molecular_function	GO:0003908	methylated-DNA-[protein]-cysteine S-methyltransferase activity	0	1	0	0.85962	1	1	1
molecular_function	GO:0003849	3-deoxy-7-phosphoheptulonate synthase activity	0	1	0	0.85962	1	1	1
biological_process	GO:0009073	aromatic amino acid family biosynthetic process	0	7	0	0.230853	0.94391	1	1
biological_process	GO:0008652	cellular amino acid biosynthetic process	0	9	0	0.000163551	0.999972	0.026	1
biological_process	GO:0009423	chorismate biosynthetic process	0	5	0	0.468974	1	1	1
molecular_function	GO:0004365	glyceraldehyde-3-phosphate dehydrogenase (NAD+) (phosphorylating) activity	0	3	0	0.635175	1	1	1
biological_process	GO:0006006	glucose metabolic process	0	7	0	0.0305476	1	0.998	1
cellular_component	GO:0016602	CCAAT-binding factor complex	0	2	0	0.740605	1	1	1
molecular_function	GO:0001228	DNA-binding transcription activator activity, RNA polymerase II-specific	0	3	0	0.635175	1	1	1
biological_process	GO:0031507	heterochromatin assembly	0	11	0	0.903303	0.23995	1	1
molecular_function	GO:0003979	UDP-glucose 6-dehydrogenase activity	0	3	0	0.635175	1	1	1
biological_process	GO:0006024	glycosaminoglycan biosynthetic process	0	3	0	0.902649	0.454316	1	1
biological_process	GO:0006065	UDP-glucuronate biosynthetic process	0	3	0	0.634925	1	1	1
molecular_function	GO:0001671	ATPase activator activity	0	6	0	0.403377	1	1	1
biological_process	GO:0044571	[2Fe-2S] cluster assembly	0	2	0	0.738742	1	1	1
biological_process	GO:0051259	protein complex oligomerization	0	9	0	0.119816	1	1	1
biological_process	GO:0097428	protein maturation by iron-sulfur cluster transfer	0	7	0	0.25578	1	1	1
cellular_component	GO:0000151	ubiquitin ligase complex	0	29	0	0.0104697	0.99579	0.464	1
molecular_function	GO:0005052	peroxisome matrix targeting signal-1 binding	0	1	0	0.85962	1	1	1
biological_process	GO:0016560	protein import into peroxisome matrix, docking	0	5	0	0.468974	1	1	1
biological_process	GO:0033617	mitochondrial cytochrome c oxidase assembly	0	6	0	0.403037	1	1	1
biological_process	GO:0032979	protein insertion into mitochondrial inner membrane from matrix	0	3	0	0.634925	1	1	1
molecular_function	GO:0050136	NADH dehydrogenase (quinone) activity	0	8	0	0.320917	0.911308	1	1
molecular_function	GO:0008753	NADPH dehydrogenase (quinone) activity	0	4	0	0.545977	1	1	1
molecular_function	GO:0008097	5S rRNA binding	0	4	0	0.545977	1	1	1
molecular_function	GO:0004069	L-aspartate:2-oxoglutarate aminotransferase activity	0	3	0	0.635175	1	1	1
molecular_function	GO:0008526	phosphatidylinositol transfer activity	0	4	0	0.545977	1	1	1
molecular_function	GO:0004729	oxygen-dependent protoporphyrinogen oxidase activity	0	2	0	0.738932	1	1	1
cellular_component	GO:0030688	preribosome, small subunit precursor	0	10	0	0.164818	1	1	1
biological_process	GO:0000480	endonucleolytic cleavage in 5'-ETS of tricistronic rRNA transcript (SSU-rRNA, 5.8S rRNA, LSU-rRNA)	0	3	0	0.634925	1	1	1
biological_process	GO:0000447	endonucleolytic cleavage in ITS1 to separate SSU-rRNA from 5.8S rRNA and LSU-rRNA from tricistronic rRNA transcript (SSU-rRNA, 5.8S rRNA, LSU-rRNA)	0	6	0	0.403037	1	1	1
biological_process	GO:0000472	endonucleolytic cleavage to generate mature 5'-end of SSU-rRNA from (SSU-rRNA, 5.8S rRNA, LSU-rRNA)	0	3	0	0.634925	1	1	1
molecular_function	GO:0004601	peroxidase activity	0	21	0	0.00199335	1	0.194	1
biological_process	GO:0080147	root hair cell development	0	3	0	0.545684	1	1	1
molecular_function	GO:0010436	carotenoid dioxygenase activity	0	10	0	0.220131	1	1	1
biological_process	GO:0016121	carotene catabolic process	0	10	0	0.219795	1	1	1
cellular_component	GO:0005788	endoplasmic reticulum lumen	0	14	0	0.122007	1	1	1
molecular_function	GO:0010011	auxin binding	0	1	0	0.85962	1	1	1
molecular_function	GO:0002161	aminoacyl-tRNA editing activity	0	12	0	0.605656	0.679083	1	1
molecular_function	GO:0004812	aminoacyl-tRNA ligase activity	0	3	0	0.106157	0.961928	1	1
cellular_component	GO:0000153	cytoplasmic ubiquitin ligase complex	0	1	0	0.164818	1	1	1
molecular_function	GO:0019776	Atg8 ligase activity	0	1	0	0.85962	1	1	1
biological_process	GO:0044804	autophagy of nucleus	0	5	0	0.976425	0.078523	1	1
molecular_function	GO:0008353	RNA polymerase II CTD heptapeptide repeat kinase activity	0	4	0	0.545977	1	1	1
molecular_function	GO:0008959	phosphate acetyltransferase activity	0	1	0	0.85962	1	1	1
molecular_function	GO:0019825	oxygen binding	0	16	0	0.0886917	1	1	1
molecular_function	GO:0008379	thioredoxin peroxidase activity	0	16	0	0.0886917	1	1	1
molecular_function	GO:0004586	ornithine decarboxylase activity	0	2	0	0.738932	1	1	1
biological_process	GO:0033387	putrescine biosynthetic process from ornithine	0	2	0	0.738742	1	1	1
biological_process	GO:0034453	microtubule anchoring	0	4	0	0.798657	0.596963	1	1
molecular_function	GO:0004413	homoserine kinase activity	0	1	0	0.85962	1	1	1
molecular_function	GO:0004408	holocytochrome-c synthase activity	0	22	0	0.035709	1	0.986	1
biological_process	GO:0018063	cytochrome c-heme linkage	0	21	0	0.0413954	1	1	1
cellular_component	GO:0031966	mitochondrial membrane	0	3	0	0.0578898	0.965825	0.992	1
molecular_function	GO:0017077	oxidative phosphorylation uncoupler activity	0	1	0	0.85962	1	1	1
biological_process	GO:1990542	mitochondrial transmembrane transport	0	1	0	0.081869	0.977392	1	1
molecular_function	GO:0019784	NEDD8-specific protease activity	0	3	0	0.635175	1	1	1
molecular_function	GO:0008276	protein methyltransferase activity	0	3	0	0.531713	0.596369	1	1
biological_process	GO:0018023	peptidyl-lysine trimethylation	0	2	0	0.738742	1	1	1
molecular_function	GO:0050418	hydroxylamine reductase activity	0	4	0	0.545977	1	1	1
molecular_function	GO:0051536	iron-sulfur cluster binding	0	26	0	0.0168976	0.992568	0.854	1
biological_process	GO:0006807	nitrogen compound metabolic process	0	20	0	0.299582	0.725279	1	1
biological_process	GO:0042542	response to hydrogen peroxide	0	13	0	0.102946	1	1	1
cellular_component	GO:0070449	elongin complex	0	2	0	0.740605	1	1	1
molecular_function	GO:0046423	allene-oxide cyclase activity	0	1	0	0.85962	1	1	1
biological_process	GO:0009695	jasmonic acid biosynthetic process	0	1	0	0.859512	1	1	1
molecular_function	GO:0016853	isomerase activity	0	6	0	4.19382e-07	1	0	1
cellular_component	GO:0035339	SPOTS complex	0	1	0	0.860593	1	1	1
biological_process	GO:0090156	cellular sphingolipid homeostasis	0	1	0	0.859512	1	1	1
biological_process	GO:0006672	ceramide metabolic process	0	2	0	0.00403559	0.998366	0.458	1
biological_process	GO:1900060	negative regulation of ceramide biosynthetic process	0	1	0	0.859512	1	1	1
cellular_component	GO:0032044	DSIF complex	0	2	0	0.740605	1	1	1
biological_process	GO:0032784	regulation of DNA-templated transcription, elongation	0	4	0	0.937638	0.177624	1	1
molecular_function	GO:0015035	protein-disulfide reductase activity	0	7	0	0.014367	1	0.801	1
biological_process	GO:0006662	glycerol ether metabolic process	0	2	0	0.738742	1	1	1
molecular_function	GO:0030060	L-malate dehydrogenase activity	0	5	0	0.469296	1	1	1
biological_process	GO:0019752	carboxylic acid metabolic process	0	5	0	9.57153e-05	0.999953	0.015	1
molecular_function	GO:0008374	O-acyltransferase activity	0	17	0	0.0489052	0.992173	0.999	1
molecular_function	GO:0005471	ATP:ADP antiporter activity	0	6	0	0.403377	1	1	1
biological_process	GO:0140021	mitochondrial ADP transmembrane transport	0	3	0	0.634925	1	1	1
biological_process	GO:1990544	mitochondrial ATP transmembrane transport	0	3	0	0.634925	1	1	1
biological_process	GO:2000779	regulation of double-strand break repair	0	1	0	0.980282	0.261258	1	1
molecular_function	GO:0004474	malate synthase activity	0	1	0	0.85962	1	1	1
biological_process	GO:0006097	glyoxylate cycle	0	2	0	0.738742	1	1	1
molecular_function	GO:0016432	tRNA-uridine aminocarboxypropyltransferase activity	0	3	0	0.635175	1	1	1
biological_process	GO:0008033	tRNA processing	0	13	0	0.00221042	0.999318	0.298	1
biological_process	GO:0042273	ribosomal large subunit biogenesis	0	14	0	0.419746	0.724729	1	1
cellular_component	GO:0030891	VCB complex	0	5	0	0.471957	1	1	1
molecular_function	GO:0004518	nuclease activity	0	7	0	0.779488	0.295458	1	1
biological_process	GO:0071277	cellular response to calcium ion	0	4	0	0.545684	1	1	1
biological_process	GO:0009704	de-etiolation	0	2	0	0.738742	1	1	1
biological_process	GO:0090333	regulation of stomatal closure	0	2	0	0.738742	1	1	1
molecular_function	GO:0003847	1-alkyl-2-acetylglycerophosphocholine esterase activity	0	3	0	0.635175	1	1	1
biological_process	GO:0090114	COPII-coated vesicle budding	0	1	0	0.844412	0.420357	1	1
biological_process	GO:0051028	mRNA transport	0	10	0	0.623986	0.54986	1	1
biological_process	GO:0030042	actin filament depolymerization	0	1	0	0.859512	1	1	1
cellular_component	GO:0000220	vacuolar proton-transporting V-type ATPase, V0 domain	0	4	0	0.548453	1	1	1
molecular_function	GO:0047938	glucose-6-phosphate 1-epimerase activity	0	3	0	0.635175	1	1	1
cellular_component	GO:0005750	mitochondrial respiratory chain complex III	0	5	0	0.471957	1	1	1
biological_process	GO:0006122	mitochondrial electron transport, ubiquinol to cytochrome c	0	6	0	0.403037	1	1	1
cellular_component	GO:0005664	nuclear origin of replication recognition complex	0	6	0	0.406123	1	1	1
cellular_component	GO:0072669	tRNA-splicing ligase complex	0	3	0	0.637334	1	1	1
biological_process	GO:0006388	tRNA splicing, via endonucleolytic cleavage and ligation	0	5	0	0.25578	1	1	1
biological_process	GO:0034553	mitochondrial respiratory chain complex II assembly	0	3	0	0.634925	1	1	1
biological_process	GO:0018293	protein-FAD linkage	0	1	0	0.859512	1	1	1
cellular_component	GO:0072380	TRC complex	0	1	0	0.860593	1	1	1
biological_process	GO:0006620	posttranslational protein targeting to endoplasmic reticulum membrane	0	5	0	0.25578	1	1	1
biological_process	GO:0030433	ubiquitin-dependent ERAD pathway	0	32	0	0.00667463	1	0.668	1
biological_process	GO:0099402	plant organ development	0	3	0	0.219795	1	1	1
biological_process	GO:0019432	triglyceride biosynthetic process	0	5	0	0.468974	1	1	1
biological_process	GO:0070534	protein K63-linked ubiquitination	0	3	0	0.634925	1	1	1
biological_process	GO:0006386	termination of RNA polymerase III transcription	0	1	0	0.859512	1	1	1
biological_process	GO:0042779	tRNA 3'-trailer cleavage	0	1	0	0.946376	0.365075	1	1
cellular_component	GO:0043626	PCNA complex	0	1	0	0.860593	1	1	1
molecular_function	GO:0030337	DNA polymerase processivity factor activity	0	1	0	0.85962	1	1	1
biological_process	GO:0070207	protein homotrimerization	0	1	0	0.859512	1	1	1
cellular_component	GO:0120115	Lsm2-8 complex	0	1	0	0.860593	1	1	1
cellular_component	GO:0005688	U6 snRNP	0	7	0	0.349465	1	1	1
biological_process	GO:0000956	nuclear-transcribed mRNA catabolic process	0	8	0	0.688157	0.450695	1	1
biological_process	GO:0033962	P-body assembly	0	5	0	0.468974	1	1	1
molecular_function	GO:0032934	sterol binding	0	6	0	0.403377	1	1	1
molecular_function	GO:0015248	sterol transporter activity	0	4	0	0.545977	1	1	1
cellular_component	GO:0000813	ESCRT I complex	0	2	0	0.740605	1	1	1
biological_process	GO:0043162	ubiquitin-dependent protein catabolic process via the multivesicular body sorting pathway	0	1	0	0.403037	1	1	1
cellular_component	GO:0070985	transcription factor TFIIK complex	0	2	0	0.740605	1	1	1
biological_process	GO:0016070	RNA metabolic process	0	3	0	0.994603	0.00695786	1	0.946
cellular_component	GO:0042721	TIM22 mitochondrial import inner membrane insertion complex	0	6	0	0.406123	1	1	1
biological_process	GO:0045039	protein insertion into mitochondrial inner membrane	0	9	0	0.25578	1	1	1
cellular_component	GO:0009707	chloroplast outer membrane	0	4	0	0.74607	0.650535	1	1
molecular_function	GO:0046481	digalactosyldiacylglycerol synthase activity	0	1	0	0.85962	1	1	1
molecular_function	GO:0035250	UDP-galactosyltransferase activity	0	1	0	0.738932	1	1	1
biological_process	GO:0019375	galactolipid biosynthetic process	0	1	0	0.859512	1	1	1
cellular_component	GO:0016272	prefoldin complex	0	6	0	0.406123	1	1	1
molecular_function	GO:0061657	UFM1 conjugating enzyme activity	0	1	0	0.85962	1	1	1
biological_process	GO:0009408	response to heat	0	11	0	0.0560897	1	1	1
molecular_function	GO:0000064	L-ornithine transmembrane transporter activity	0	3	0	0.635175	1	1	1
biological_process	GO:1990575	mitochondrial L-ornithine transmembrane transport	0	3	0	0.634925	1	1	1
cellular_component	GO:0097730	non-motile cilium	0	4	0	0.548453	1	1	1
molecular_function	GO:0004401	histidinol-phosphatase activity	0	1	0	0.85962	1	1	1
molecular_function	GO:0042578	phosphoric ester hydrolase activity	0	2	0	0.194855	0.843283	1	1
biological_process	GO:0000105	histidine biosynthetic process	0	10	0	0.219795	1	1	1
biological_process	GO:0000479	endonucleolytic cleavage of tricistronic rRNA transcript (SSU-rRNA, 5.8S rRNA, LSU-rRNA)	0	3	0	0.188868	1	1	1
cellular_component	GO:1990726	Lsm1-7-Pat1 complex	0	5	0	0.471957	1	1	1
cellular_component	GO:0005689	U12-type spliceosomal complex	0	8	0	0.300705	1	1	1
biological_process	GO:0016584	nucleosome positioning	0	5	0	0.468974	1	1	1
molecular_function	GO:0042277	peptide binding	0	2	0	0.138353	0.940728	1	1
biological_process	GO:0043171	peptide catabolic process	0	3	0	0.403037	1	1	1
cellular_component	GO:0005938	cell cortex	0	3	0	0.57039	0.707861	1	1
molecular_function	GO:0003785	actin monomer binding	0	1	0	0.85962	1	1	1
biological_process	GO:0042989	sequestering of actin monomers	0	1	0	0.859512	1	1	1
cellular_component	GO:0048188	Set1C/COMPASS complex	0	5	0	0.471957	1	1	1
molecular_function	GO:0140575	transmembrane monodehydroascorbate reductase activity	0	2	0	0.738932	1	1	1
biological_process	GO:0006376	mRNA splice site selection	0	2	0	0.403037	1	1	1
cellular_component	GO:0042406	extrinsic component of endoplasmic reticulum membrane	0	2	0	0.740605	1	1	1
cellular_component	GO:0043541	UDP-N-acetylglucosamine transferase complex	0	2	0	0.740605	1	1	1
molecular_function	GO:0016628	oxidoreductase activity, acting on the CH-CH group of donors, NAD or NADP as acceptor	0	2	0	0.0886917	1	1	1
biological_process	GO:0070979	protein K11-linked ubiquitination	0	5	0	0.468974	1	1	1
biological_process	GO:0042744	hydrogen peroxide catabolic process	0	10	0	0.188868	1	1	1
cellular_component	GO:0010319	stromule	0	3	0	0.637334	1	1	1
molecular_function	GO:0042132	fructose 1,6-bisphosphate 1-phosphatase activity	0	4	0	0.545977	1	1	1
biological_process	GO:0030388	fructose 1,6-bisphosphate metabolic process	0	7	0	0.346362	1	1	1
biological_process	GO:0006000	fructose metabolic process	0	6	0	0.403037	1	1	1
biological_process	GO:0006094	gluconeogenesis	0	11	0	0.162289	1	1	1
biological_process	GO:0005986	sucrose biosynthetic process	0	4	0	0.545684	1	1	1
biological_process	GO:0019419	sulfate reduction	0	1	0	0.859512	1	1	1
biological_process	GO:0000245	spliceosomal complex assembly	0	4	0	0.219795	1	1	1
cellular_component	GO:0045252	oxoglutarate dehydrogenase complex	0	3	0	0.637334	1	1	1
molecular_function	GO:0004149	dihydrolipoyllysine-residue succinyltransferase activity	0	1	0	0.85962	1	1	1
biological_process	GO:0033512	L-lysine catabolic process to acetyl-CoA via saccharopine	0	1	0	0.859512	1	1	1
cellular_component	GO:0031415	NatA complex	0	2	0	0.740605	1	1	1
molecular_function	GO:1990190	peptide-glutamate-N-acetyltransferase activity	0	1	0	0.85962	1	1	1
molecular_function	GO:1990189	peptide-serine-N-acetyltransferase activity	0	2	0	0.738932	1	1	1
biological_process	GO:0018002	N-terminal peptidyl-glutamic acid acetylation	0	1	0	0.859512	1	1	1
biological_process	GO:0017198	N-terminal peptidyl-serine acetylation	0	1	0	0.859512	1	1	1
cellular_component	GO:0015934	large ribosomal subunit	0	13	0	8.05213e-05	0.999994	0.01	1
molecular_function	GO:0008734	L-aspartate oxidase activity	0	1	0	0.85962	1	1	1
molecular_function	GO:0044318	L-aspartate:fumarate oxidoreductase activity	0	1	0	0.85962	1	1	1
biological_process	GO:0009435	NAD biosynthetic process	0	6	0	0.297649	1	1	1
molecular_function	GO:0030234	enzyme regulator activity	0	12	0	0.102116	0.944963	1	1
molecular_function	GO:0000774	adenyl-nucleotide exchange factor activity	0	7	0	0.34671	1	1	1
molecular_function	GO:0004571	mannosyl-oligosaccharide 1,2-alpha-mannosidase activity	0	2	0	0.738932	1	1	1
biological_process	GO:0019674	NAD metabolic process	0	7	0	0.565132	0.712234	1	1
molecular_function	GO:0005093	Rab GDP-dissociation inhibitor activity	0	1	0	0.85962	1	1	1
biological_process	GO:0007264	small GTPase mediated signal transduction	0	3	0	0.403037	1	1	1
molecular_function	GO:0004458	D-lactate dehydrogenase (cytochrome) activity	0	2	0	0.738932	1	1	1
molecular_function	GO:0008720	D-lactate dehydrogenase activity	0	2	0	0.738932	1	1	1
biological_process	GO:1903457	lactate catabolic process	0	2	0	0.738742	1	1	1
cellular_component	GO:0008250	oligosaccharyltransferase complex	0	6	0	0.406123	1	1	1
cellular_component	GO:0010008	endosome membrane	0	12	0	0.173003	0.942985	1	1
biological_process	GO:0072657	protein localization to membrane	0	5	0	0.00184682	0.999705	0.259	1
molecular_function	GO:0051920	peroxiredoxin activity	0	4	0	0.0483631	1	0.999	1
molecular_function	GO:0004032	alditol:NADP+ 1-oxidoreductase activity	0	3	0	0.635175	1	1	1
molecular_function	GO:0003938	IMP dehydrogenase activity	0	1	0	0.85962	1	1	1
biological_process	GO:0006177	GMP biosynthetic process	0	2	0	0.468974	1	1	1
cellular_component	GO:0070765	gamma-secretase complex	0	2	0	0.740605	1	1	1
biological_process	GO:0007219	Notch signaling pathway	0	3	0	0.634925	1	1	1
molecular_function	GO:0000062	fatty-acyl-CoA binding	0	5	0	0.403377	1	1	1
molecular_function	GO:0003861	3-isopropylmalate dehydratase activity	0	2	0	0.738932	1	1	1
biological_process	GO:0043436	oxoacid metabolic process	0	2	0	5.14207e-05	0.999975	0.01	1
molecular_function	GO:0005080	protein kinase C binding	0	1	0	0.85962	1	1	1
biological_process	GO:0001934	positive regulation of protein phosphorylation	0	3	0	0.468974	1	1	1
biological_process	GO:0045899	positive regulation of RNA polymerase II transcription preinitiation complex assembly	0	2	0	0.738742	1	1	1
cellular_component	GO:0030132	clathrin coat of coated pit	0	3	0	0.471957	1	1	1
cellular_component	GO:0030130	clathrin coat of trans-Golgi network vesicle	0	3	0	0.471957	1	1	1
molecular_function	GO:0032050	clathrin heavy chain binding	0	2	0	0.738932	1	1	1
biological_process	GO:0048268	clathrin coat assembly	0	2	0	0.738742	1	1	1
molecular_function	GO:0050833	pyruvate transmembrane transporter activity	0	1	0	0.85962	1	1	1
biological_process	GO:0006850	mitochondrial pyruvate transmembrane transport	0	2	0	0.738742	1	1	1
molecular_function	GO:0003872	6-phosphofructokinase activity	0	3	0	0.635175	1	1	1
molecular_function	GO:0004185	serine-type carboxypeptidase activity	0	9	0	0.256125	1	1	1
molecular_function	GO:0097573	glutathione oxidoreductase activity	0	8	0	0.297998	1	1	1
cellular_component	GO:0030008	TRAPP complex	0	6	0	0.258744	1	1	1
molecular_function	GO:0016688	L-ascorbate peroxidase activity	0	3	0	0.635175	1	1	1
biological_process	GO:0000302	response to reactive oxygen species	0	4	0	0.0225401	1	0.984	1
molecular_function	GO:0019905	syntaxin binding	0	11	0	0.189192	1	1	1
molecular_function	GO:0004325	ferrochelatase activity	0	2	0	0.738932	1	1	1
molecular_function	GO:0008465	glycerate dehydrogenase activity	0	1	0	0.85962	1	1	1
molecular_function	GO:0030267	glyoxylate reductase (NADP+) activity	0	2	0	0.738932	1	1	1
molecular_function	GO:0016618	hydroxypyruvate reductase activity	0	2	0	0.738932	1	1	1
molecular_function	GO:1990841	promoter-specific chromatin binding	0	2	0	0.738932	1	1	1
biological_process	GO:0045943	positive regulation of transcription by RNA polymerase I	0	4	0	0.545684	1	1	1
biological_process	GO:0006004	fucose metabolic process	0	5	0	0.468974	1	1	1
molecular_function	GO:0016971	flavin-linked sulfhydryl oxidase activity	0	3	0	0.635175	1	1	1
cellular_component	GO:1990718	axonemal central pair projection	0	2	0	0.740605	1	1	1
cellular_component	GO:0000015	phosphopyruvate hydratase complex	0	1	0	0.860593	1	1	1
molecular_function	GO:0004634	phosphopyruvate hydratase activity	0	1	0	0.85962	1	1	1
molecular_function	GO:0047536	2-aminoadipate transaminase activity	0	2	0	0.738932	1	1	1
cellular_component	GO:0031011	Ino80 complex	0	3	0	0.637334	1	1	1
cellular_component	GO:0097255	R2TP complex	0	2	0	0.740605	1	1	1
biological_process	GO:0048507	meristem development	0	1	0	0.738742	1	1	1
biological_process	GO:1900150	regulation of defense response to fungus	0	1	0	0.859512	1	1	1
molecular_function	GO:0052636	arabinosyltransferase activity	0	10	0	0.220131	1	1	1
biological_process	GO:0052325	cell wall pectin biosynthetic process	0	10	0	0.219795	1	1	1
molecular_function	GO:0005053	peroxisome matrix targeting signal-2 binding	0	1	0	0.85962	1	1	1
molecular_function	GO:0004424	imidazoleglycerol-phosphate dehydratase activity	0	1	0	0.85962	1	1	1
molecular_function	GO:0004066	asparagine synthase (glutamine-hydrolyzing) activity	0	3	0	0.635175	1	1	1
biological_process	GO:0006529	asparagine biosynthetic process	0	3	0	0.634925	1	1	1
cellular_component	GO:0071541	eukaryotic translation initiation factor 3 complex, eIF3m	0	3	0	0.637334	1	1	1
biological_process	GO:0002183	cytoplasmic translational initiation	0	4	0	0.163925	0.964439	1	1
cellular_component	GO:0000274	mitochondrial proton-transporting ATP synthase, stator stalk	0	1	0	0.860593	1	1	1
molecular_function	GO:0004356	glutamate-ammonia ligase activity	0	5	0	0.469296	1	1	1
biological_process	GO:0006542	glutamine biosynthetic process	0	5	0	0.468974	1	1	1
cellular_component	GO:0016939	kinesin II complex	0	1	0	0.860593	1	1	1
molecular_function	GO:0019894	kinesin binding	0	2	0	0.738932	1	1	1
biological_process	GO:0044782	cilium organization	0	4	0	0.93832	0.100097	1	1
biological_process	GO:0044458	motile cilium assembly	0	4	0	0.545684	1	1	1
molecular_function	GO:0008124	4-alpha-hydroxytetrahydrobiopterin dehydratase activity	0	2	0	0.738932	1	1	1
biological_process	GO:0006729	tetrahydrobiopterin biosynthetic process	0	4	0	0.545684	1	1	1
molecular_function	GO:0061608	nuclear import signal receptor activity	0	10	0	0.220131	1	1	1
molecular_function	GO:0008139	nuclear localization sequence binding	0	10	0	0.220131	1	1	1
molecular_function	GO:0016765	transferase activity, transferring alkyl or aryl (other than methyl) groups	0	2	0	0.0626916	0.976674	1	1
biological_process	GO:0009263	deoxyribonucleotide biosynthetic process	0	3	0	0.743087	0.653638	1	1
molecular_function	GO:0036424	L-phosphoserine phosphatase activity	0	2	0	0.738932	1	1	1
biological_process	GO:0006564	L-serine biosynthetic process	0	3	0	0.634925	1	1	1
cellular_component	GO:0034274	Atg12-Atg5-Atg16 complex	0	2	0	0.740605	1	1	1
biological_process	GO:0006501	C-terminal protein lipidation	0	3	0	0.634925	1	1	1
cellular_component	GO:0005786	signal recognition particle, endoplasmic reticulum targeting	0	7	0	0.349465	1	1	1
molecular_function	GO:0008312	7S RNA binding	0	7	0	0.34671	1	1	1
molecular_function	GO:0030942	endoplasmic reticulum signal peptide binding	0	3	0	0.635175	1	1	1
biological_process	GO:0006616	SRP-dependent cotranslational protein targeting to membrane, translocation	0	5	0	0.468974	1	1	1
cellular_component	GO:0009941	chloroplast envelope	0	9	0	0.992671	0.0135482	1	0.891
cellular_component	GO:0033180	proton-transporting V-type ATPase, V1 domain	0	3	0	0.854435	0.528043	1	1
cellular_component	GO:0042719	mitochondrial intermembrane space protein transporter complex	0	2	0	0.740605	1	1	1
molecular_function	GO:0080025	phosphatidylinositol-3,5-bisphosphate binding	0	2	0	0.738932	1	1	1
biological_process	GO:0006497	protein lipidation	0	3	0	0.00573206	1	0.609	1
biological_process	GO:0034497	protein localization to phagophore assembly site	0	5	0	0.468974	1	1	1
molecular_function	GO:0031418	L-ascorbic acid binding	0	28	0	0.014367	1	0.801	1
molecular_function	GO:0004656	procollagen-proline 4-dioxygenase activity	0	20	0	0.0483631	1	0.999	1
biological_process	GO:0018401	peptidyl-proline hydroxylation to 4-hydroxy-L-proline	0	20	0	0.0481862	1	1	1
cellular_component	GO:0033063	Rad51B-Rad51C-Rad51D-XRCC2 complex	0	4	0	0.548453	1	1	1
biological_process	GO:0034551	mitochondrial respiratory chain complex III assembly	0	1	0	0.859512	1	1	1
molecular_function	GO:0004316	3-oxoacyl-[acyl-carrier-protein] reductase (NADPH) activity	0	1	0	0.85962	1	1	1
biological_process	GO:0030497	fatty acid elongation	0	3	0	0.634925	1	1	1
molecular_function	GO:0015171	amino acid transmembrane transporter activity	0	9	0	0.35651	0.896794	1	1
biological_process	GO:0003333	amino acid transmembrane transport	0	8	0	0.481243	0.837711	1	1
molecular_function	GO:0004614	phosphoglucomutase activity	0	1	0	0.85962	1	1	1
molecular_function	GO:0048038	quinone binding	0	8	0	0.256125	1	1	1
biological_process	GO:0009060	aerobic respiration	0	4	0	0.168874	0.918218	1	1
biological_process	GO:0015990	electron transport coupled proton transport	0	1	0	0.859512	1	1	1
molecular_function	GO:0008113	peptide-methionine (S)-S-oxide reductase activity	0	6	0	0.403377	1	1	1
cellular_component	GO:0009898	cytoplasmic side of plasma membrane	0	2	0	0.973549	0.118871	1	1
biological_process	GO:0051782	negative regulation of cell division	0	1	0	0.859512	1	1	1
cellular_component	GO:0001534	radial spoke	0	2	0	0.740605	1	1	1
biological_process	GO:0035082	axoneme assembly	0	6	0	0.702194	0.506573	1	1
molecular_function	GO:0004860	protein kinase inhibitor activity	0	1	0	0.85962	1	1	1
biological_process	GO:0006469	negative regulation of protein kinase activity	0	1	0	0.738742	1	1	1
cellular_component	GO:0071261	Ssh1 translocon complex	0	1	0	0.860593	1	1	1
molecular_function	GO:0008320	protein transmembrane transporter activity	0	10	0	0.120093	1	1	1
biological_process	GO:0031204	posttranslational protein targeting to membrane, translocation	0	5	0	0.468974	1	1	1
molecular_function	GO:0004602	glutathione peroxidase activity	0	7	0	0.34671	1	1	1
molecular_function	GO:0047280	nicotinamide phosphoribosyltransferase activity	0	1	0	0.85962	1	1	1
molecular_function	GO:0004514	nicotinate-nucleotide diphosphorylase (carboxylating) activity	0	3	0	0.635175	1	1	1
molecular_function	GO:0008252	nucleotidase activity	0	2	0	0.256125	1	1	1
molecular_function	GO:0003935	GTP cyclohydrolase II activity	0	2	0	0.738932	1	1	1
molecular_function	GO:0008721	D-serine ammonia-lyase activity	0	2	0	0.738932	1	1	1
molecular_function	GO:0003941	L-serine ammonia-lyase activity	0	2	0	0.738932	1	1	1
molecular_function	GO:0030378	serine racemase activity	0	1	0	0.85962	1	1	1
molecular_function	GO:0018114	threonine racemase activity	0	1	0	0.85962	1	1	1
biological_process	GO:0070179	D-serine biosynthetic process	0	1	0	0.859512	1	1	1
biological_process	GO:0006563	L-serine metabolic process	0	1	0	0.119816	1	1	1
biological_process	GO:0042866	pyruvate biosynthetic process	0	1	0	0.859512	1	1	1
molecular_function	GO:0004834	tryptophan synthase activity	0	2	0	0.738932	1	1	1
molecular_function	GO:0031386	protein tag	0	20	0	0.0483631	1	0.999	1
biological_process	GO:0019941	modification-dependent protein catabolic process	0	10	0	0.000558805	0.999746	0.066	1
cellular_component	GO:0005769	early endosome	0	5	0	0.406123	1	1	1
molecular_function	GO:0004598	peptidylamidoglycolate lyase activity	0	1	0	0.85962	1	1	1
molecular_function	GO:0004504	peptidylglycine monooxygenase activity	0	1	0	0.85962	1	1	1
molecular_function	GO:0008865	fructokinase activity	0	1	0	0.85962	1	1	1
molecular_function	GO:0004340	glucokinase activity	0	2	0	0.738932	1	1	1
molecular_function	GO:0005536	glucose binding	0	2	0	0.738932	1	1	1
molecular_function	GO:0019158	mannokinase activity	0	1	0	0.85962	1	1	1
biological_process	GO:0001678	cellular glucose homeostasis	0	1	0	0.859512	1	1	1
biological_process	GO:0051156	glucose 6-phosphate metabolic process	0	2	0	0.102946	1	1	1
biological_process	GO:0019318	hexose metabolic process	0	1	0	0.00124889	1	0.18	1
cellular_component	GO:0019774	proteasome core complex, beta-subunit complex	0	8	0	0.300705	1	1	1
molecular_function	GO:0004298	threonine-type endopeptidase activity	0	9	0	0.256125	1	1	1
molecular_function	GO:0004372	glycine hydroxymethyltransferase activity	0	3	0	0.635175	1	1	1
molecular_function	GO:0070905	serine binding	0	3	0	0.635175	1	1	1
biological_process	GO:0046655	folic acid metabolic process	0	3	0	0.403037	1	1	1
biological_process	GO:0019264	glycine biosynthetic process from serine	0	3	0	0.634925	1	1	1
biological_process	GO:0006565	L-serine catabolic process	0	4	0	0.545684	1	1	1
biological_process	GO:0046653	tetrahydrofolate metabolic process	0	3	0	0.394643	0.880184	1	1
molecular_function	GO:0008324	cation transmembrane transporter activity	0	13	0	0.818813	0.233165	1	1
molecular_function	GO:0004639	phosphoribosylaminoimidazolesuccinocarboxamide synthase activity	0	1	0	0.85962	1	1	1
molecular_function	GO:0004805	trehalose-phosphatase activity	0	1	0	0.85962	1	1	1
biological_process	GO:0005992	trehalose biosynthetic process	0	1	0	0.859512	1	1	1
cellular_component	GO:0005742	mitochondrial outer membrane translocase complex	0	3	0	0.349465	1	1	1
cellular_component	GO:0009317	acetyl-CoA carboxylase complex	0	3	0	0.637334	1	1	1
molecular_function	GO:0003989	acetyl-CoA carboxylase activity	0	5	0	0.469296	1	1	1
biological_process	GO:0043001	Golgi to plasma membrane protein transport	0	3	0	0.634925	1	1	1
biological_process	GO:0033365	protein localization to organelle	0	1	0	0.777611	0.28914	1	1
cellular_component	GO:0005662	DNA replication factor A complex	0	3	0	0.637334	1	1	1
molecular_function	GO:0043047	single-stranded telomeric DNA binding	0	3	0	0.635175	1	1	1
biological_process	GO:0051321	meiotic cell cycle	0	10	0	0.780334	0.344807	1	1
biological_process	GO:0006289	nucleotide-excision repair	0	15	0	0.375137	0.813924	1	1
cellular_component	GO:0036157	outer dynein arm	0	5	0	0.471957	1	1	1
molecular_function	GO:0004865	protein serine/threonine phosphatase inhibitor activity	0	2	0	0.738932	1	1	1
biological_process	GO:0032515	negative regulation of phosphoprotein phosphatase activity	0	2	0	0.738742	1	1	1
molecular_function	GO:0061632	RNA lariat debranching enzyme activator activity	0	3	0	0.635175	1	1	1
biological_process	GO:0043248	proteasome assembly	0	10	0	0.162289	1	1	1
biological_process	GO:0034613	cellular protein localization	0	4	0	0.317736	0.73884	1	1
molecular_function	GO:0008121	ubiquinol-cytochrome-c reductase activity	0	1	0	0.85962	1	1	1
cellular_component	GO:0042720	mitochondrial inner membrane peptidase complex	0	2	0	0.740605	1	1	1
biological_process	GO:0006627	protein processing involved in protein targeting to mitochondrion	0	2	0	0.738742	1	1	1
biological_process	GO:0006465	signal peptide processing	0	15	0	0.102946	1	1	1
biological_process	GO:0055072	iron ion homeostasis	0	9	0	0.625751	0.615214	1	1
molecular_function	GO:0016410	N-acyltransferase activity	0	7	0	0.433524	0.697844	1	1
molecular_function	GO:0050291	sphingosine N-acyltransferase activity	0	7	0	0.34671	1	1	1
molecular_function	GO:0042802	identical protein binding	0	9	0	0.164377	0.964291	1	1
cellular_component	GO:0005785	signal recognition particle receptor complex	0	2	0	0.740605	1	1	1
biological_process	GO:0045047	protein targeting to ER	0	5	0	0.0305476	1	0.998	1
cellular_component	GO:0005967	mitochondrial pyruvate dehydrogenase complex	0	1	0	0.860593	1	1	1
molecular_function	GO:0004739	pyruvate dehydrogenase (acetyl-transferring) activity	0	4	0	0.545977	1	1	1
biological_process	GO:0006086	acetyl-CoA biosynthetic process from pyruvate	0	4	0	0.545684	1	1	1
cellular_component	GO:0000176	nuclear exosome (RNase complex)	0	12	0	0.164818	1	1	1
biological_process	GO:0009228	thiamine biosynthetic process	0	6	0	0.403037	1	1	1
biological_process	GO:0009229	thiamine diphosphate biosynthetic process	0	4	0	0.545684	1	1	1
cellular_component	GO:0099080	supramolecular complex	0	1	0	0.99924	0.00134032	1	0.18
molecular_function	GO:0097718	disordered domain specific binding	0	1	0	0.85962	1	1	1
molecular_function	GO:0008974	phosphoribulokinase activity	0	1	0	0.85962	1	1	1
molecular_function	GO:0004719	protein-L-isoaspartate (D-aspartate) O-methyltransferase activity	0	4	0	0.545977	1	1	1
cellular_component	GO:0035371	microtubule plus-end	0	1	0	0.860593	1	1	1
biological_process	GO:1904825	protein localization to microtubule plus-end	0	1	0	0.859512	1	1	1
molecular_function	GO:0016788	hydrolase activity, acting on ester bonds	0	6	0	0.526554	0.519234	1	1
molecular_function	GO:0008193	tRNA guanylyltransferase activity	0	1	0	0.85962	1	1	1
biological_process	GO:0006400	tRNA modification	0	11	0	0.00440297	0.998825	0.505	1
molecular_function	GO:0004359	glutaminase activity	0	2	0	0.738932	1	1	1
molecular_function	GO:0003952	NAD+ synthase (glutamine-hydrolyzing) activity	0	1	0	0.85962	1	1	1
biological_process	GO:0070262	peptidyl-serine dephosphorylation	0	1	0	0.859512	1	1	1
biological_process	GO:0045037	protein import into chloroplast stroma	0	4	0	0.545684	1	1	1
biological_process	GO:0045038	protein import into chloroplast thylakoid membrane	0	2	0	0.738742	1	1	1
cellular_component	GO:0042709	succinate-CoA ligase complex	0	1	0	0.740605	1	1	1
molecular_function	GO:0004775	succinate-CoA ligase (ADP-forming) activity	0	2	0	0.738932	1	1	1
molecular_function	GO:0004776	succinate-CoA ligase (GDP-forming) activity	0	2	0	0.738932	1	1	1
biological_process	GO:0006104	succinyl-CoA metabolic process	0	1	0	0.859512	1	1	1
cellular_component	GO:0032153	cell division site	0	3	0	0.300705	1	1	1
cellular_component	GO:0031105	septin complex	0	1	0	0.860593	1	1	1
cellular_component	GO:0005940	septin ring	0	1	0	0.860593	1	1	1
biological_process	GO:0061640	cytoskeleton-dependent cytokinesis	0	1	0	0.852524	0.531026	1	1
cellular_component	GO:0005801	cis-Golgi network	0	9	0	0.222633	1	1	1
cellular_component	GO:0005797	Golgi medial cisterna	0	2	0	0.740605	1	1	1
molecular_function	GO:0004807	triose-phosphate isomerase activity	0	1	0	0.85962	1	1	1
biological_process	GO:0046166	glyceraldehyde-3-phosphate biosynthetic process	0	1	0	0.859512	1	1	1
biological_process	GO:0019563	glycerol catabolic process	0	5	0	0.468974	1	1	1
molecular_function	GO:0033743	peptide-methionine (R)-S-oxide reductase activity	0	4	0	0.545977	1	1	1
cellular_component	GO:0033263	CORVET complex	0	1	0	0.860593	1	1	1
cellular_component	GO:0005773	vacuole	0	8	0	0.803554	0.298104	1	1
cellular_component	GO:0005905	clathrin-coated pit	0	2	0	0.349465	1	1	1
cellular_component	GO:0005869	dynactin complex	0	2	0	0.740605	1	1	1
molecular_function	GO:0050518	2-C-methyl-D-erythritol 4-phosphate cytidylyltransferase activity	0	1	0	0.85962	1	1	1
molecular_function	GO:0008441	3'(2'),5'-bisphosphate nucleotidase activity	0	2	0	0.738932	1	1	1
biological_process	GO:0046854	phosphatidylinositol phosphate biosynthetic process	0	9	0	0.25578	1	1	1
biological_process	GO:0000103	sulfate assimilation	0	6	0	0.403037	1	1	1
cellular_component	GO:0005758	mitochondrial intermembrane space	0	8	0	0.222633	1	1	1
molecular_function	GO:0016531	copper chaperone activity	0	2	0	0.738932	1	1	1
molecular_function	GO:0008514	organic anion transmembrane transporter activity	0	2	0	0.0803083	0.985633	1	1
molecular_function	GO:0015605	organophosphate ester transmembrane transporter activity	0	2	0	0.0762173	1	1	1
biological_process	GO:0015718	monocarboxylic acid transport	0	2	0	0.219795	1	1	1
molecular_function	GO:0003714	transcription corepressor activity	0	11	0	0.189192	1	1	1
biological_process	GO:0070370	cellular heat acclimation	0	1	0	0.859512	1	1	1
biological_process	GO:0032273	positive regulation of protein polymerization	0	6	0	0.102946	1	1	1
molecular_function	GO:0044877	protein-containing complex binding	0	6	0	0.566086	0.545082	1	1
biological_process	GO:1901006	ubiquinone-6 biosynthetic process	0	2	0	0.738742	1	1	1
molecular_function	GO:0008173	RNA methyltransferase activity	0	13	0	0.00828622	0.998419	0.6	1
molecular_function	GO:0008175	tRNA methyltransferase activity	0	4	0	0.186666	0.937232	1	1
biological_process	GO:0002128	tRNA nucleoside ribose methylation	0	5	0	0.297649	1	1	1
biological_process	GO:0046034	ATP metabolic process	0	1	0	0.0214189	0.99317	0.979	1
molecular_function	GO:0046923	ER retention sequence binding	0	4	0	0.545977	1	1	1
biological_process	GO:0006621	protein retention in ER lumen	0	5	0	0.468974	1	1	1
molecular_function	GO:0016651	oxidoreductase activity, acting on NAD(P)H	0	8	0	0.140073	0.946751	1	1
molecular_function	GO:0050178	phenylpyruvate tautomerase activity	0	1	0	0.85962	1	1	1
molecular_function	GO:0000340	RNA 7-methylguanosine cap binding	0	4	0	0.545977	1	1	1
molecular_function	GO:0004449	isocitrate dehydrogenase (NAD+) activity	0	2	0	0.738932	1	1	1
biological_process	GO:0006102	isocitrate metabolic process	0	3	0	0.634925	1	1	1
biological_process	GO:0032436	positive regulation of proteasomal ubiquitin-dependent protein catabolic process	0	12	0	0.119816	1	1	1
cellular_component	GO:0009349	riboflavin synthase complex	0	1	0	0.860593	1	1	1
molecular_function	GO:0000906	6,7-dimethyl-8-ribityllumazine synthase activity	0	1	0	0.85962	1	1	1
molecular_function	GO:0008177	succinate dehydrogenase (ubiquinone) activity	0	2	0	0.738932	1	1	1
molecular_function	GO:0000104	succinate dehydrogenase activity	0	1	0	0.738932	1	1	1
biological_process	GO:0006665	sphingolipid metabolic process	0	6	0	0.000933393	0.999659	0.125	1
molecular_function	GO:0008823	cupric reductase activity	0	1	0	0.85962	1	1	1
molecular_function	GO:0052851	ferric-chelate reductase (NADPH) activity	0	1	0	0.85962	1	1	1
biological_process	GO:0015677	copper ion import	0	1	0	0.859512	1	1	1
molecular_function	GO:0016830	carbon-carbon lyase activity	0	1	0	0.618624	0.542551	1	1
cellular_component	GO:0000814	ESCRT II complex	0	3	0	0.637334	1	1	1
biological_process	GO:0043328	protein transport to vacuole involved in ubiquitin-dependent protein catabolic process via the multivesicular body sorting pathway	0	5	0	0.468974	1	1	1
cellular_component	GO:0031429	box H/ACA snoRNP complex	0	7	0	0.349465	1	1	1
molecular_function	GO:0034513	box H/ACA snoRNA binding	0	5	0	0.469296	1	1	1
biological_process	GO:0000469	cleavage involved in rRNA processing	0	3	0	0.0262405	1	0.996	1
biological_process	GO:0031118	rRNA pseudouridine synthesis	0	4	0	0.102946	1	1	1
biological_process	GO:0031120	snRNA pseudouridine synthesis	0	4	0	0.545684	1	1	1
biological_process	GO:0009651	response to salt stress	0	9	0	0.219795	1	1	1
molecular_function	GO:0042907	xanthine transmembrane transporter activity	0	3	0	0.635175	1	1	1
biological_process	GO:0042906	xanthine transport	0	3	0	0.634925	1	1	1
molecular_function	GO:0009020	tRNA (guanosine-2'-O-)-methyltransferase activity	0	2	0	0.738932	1	1	1
biological_process	GO:0002938	tRNA guanine ribose methylation	0	2	0	0.738742	1	1	1
cellular_component	GO:0097546	ciliary base	0	5	0	0.471957	1	1	1
cellular_component	GO:0005971	ribonucleoside-diphosphate reductase complex	0	1	0	0.860593	1	1	1
molecular_function	GO:0004748	ribonucleoside-diphosphate reductase activity, thioredoxin disulfide as acceptor	0	2	0	0.738932	1	1	1
biological_process	GO:0009202	deoxyribonucleoside triphosphate biosynthetic process	0	1	0	0.946376	0.365075	1	1
molecular_function	GO:0004357	glutamate-cysteine ligase activity	0	1	0	0.85962	1	1	1
biological_process	GO:0006750	glutathione biosynthetic process	0	1	0	0.859512	1	1	1
molecular_function	GO:0061599	molybdopterin molybdotransferase activity	0	2	0	0.738932	1	1	1
biological_process	GO:0006777	Mo-molybdopterin cofactor biosynthetic process	0	8	0	0.297649	1	1	1
biological_process	GO:0015706	nitrate transport	0	1	0	0.859512	1	1	1
biological_process	GO:0010167	response to nitrate	0	1	0	0.859512	1	1	1
biological_process	GO:0010506	regulation of autophagy	0	4	0	0.403037	1	1	1
biological_process	GO:0031116	positive regulation of microtubule polymerization	0	2	0	0.738742	1	1	1
molecular_function	GO:0004332	fructose-bisphosphate aldolase activity	0	4	0	0.545977	1	1	1
molecular_function	GO:0008716	D-alanine-D-alanine ligase activity	0	4	0	0.545977	1	1	1
molecular_function	GO:0004648	O-phospho-L-serine:2-oxoglutarate aminotransferase activity	0	1	0	0.85962	1	1	1
molecular_function	GO:0004475	mannose-1-phosphate guanylyltransferase activity	0	1	0	0.85962	1	1	1
biological_process	GO:0000032	cell wall mannoprotein biosynthetic process	0	2	0	0.738742	1	1	1
biological_process	GO:0009298	GDP-mannose biosynthetic process	0	3	0	0.634925	1	1	1
biological_process	GO:0043966	histone H3 acetylation	0	2	0	0.634925	1	1	1
molecular_function	GO:0003756	protein disulfide isomerase activity	0	7	0	0.34671	1	1	1
molecular_function	GO:0003866	3-phosphoshikimate 1-carboxyvinyltransferase activity	0	1	0	0.85962	1	1	1
cellular_component	GO:0033185	dolichol-phosphate-mannose synthase complex	0	1	0	0.860593	1	1	1
biological_process	GO:0006506	GPI anchor biosynthetic process	0	11	0	0.0884495	1	1	1
biological_process	GO:0009617	response to bacterium	0	2	0	0.634925	1	1	1
molecular_function	GO:0004616	phosphogluconate dehydrogenase (decarboxylating) activity	0	1	0	0.85962	1	1	1
biological_process	GO:0046177	D-gluconate catabolic process	0	2	0	0.738742	1	1	1
biological_process	GO:0009051	pentose-phosphate shunt, oxidative branch	0	4	0	0.545684	1	1	1
molecular_function	GO:0008934	inositol monophosphate 1-phosphatase activity	0	3	0	0.635175	1	1	1
molecular_function	GO:0052832	inositol monophosphate 3-phosphatase activity	0	3	0	0.635175	1	1	1
molecular_function	GO:0052833	inositol monophosphate 4-phosphatase activity	0	3	0	0.635175	1	1	1
biological_process	GO:0006021	inositol biosynthetic process	0	4	0	0.545684	1	1	1
biological_process	GO:0006020	inositol metabolic process	0	5	0	0.902503	0.272118	1	1
molecular_function	GO:0046537	2,3-bisphosphoglycerate-independent phosphoglycerate mutase activity	0	2	0	0.738932	1	1	1
biological_process	GO:0044262	cellular carbohydrate metabolic process	0	3	0	0.437998	0.670397	1	1
biological_process	GO:0006007	glucose catabolic process	0	1	0	0.859512	1	1	1
molecular_function	GO:0031492	nucleosomal DNA binding	0	3	0	0.635175	1	1	1
cellular_component	GO:0005951	carbamoyl-phosphate synthase complex	0	1	0	0.860593	1	1	1
molecular_function	GO:0004088	carbamoyl-phosphate synthase (glutamine-hydrolyzing) activity	0	2	0	0.738932	1	1	1
biological_process	GO:0006207	'de novo' pyrimidine nucleobase biosynthetic process	0	7	0	0.346362	1	1	1
biological_process	GO:0006526	arginine biosynthetic process	0	7	0	0.25578	1	1	1
biological_process	GO:0007017	microtubule-based process	0	6	0	0.999612	0.000718735	1	0.259
cellular_component	GO:0071458	integral component of cytoplasmic side of endoplasmic reticulum membrane	0	3	0	0.637334	1	1	1
cellular_component	GO:0071556	integral component of lumenal side of endoplasmic reticulum membrane	0	3	0	0.637334	1	1	1
molecular_function	GO:0042500	aspartic endopeptidase activity, intramembrane cleaving	0	3	0	0.635175	1	1	1
biological_process	GO:0033619	membrane protein proteolysis	0	3	0	0.634925	1	1	1
biological_process	GO:0006044	N-acetylglucosamine metabolic process	0	1	0	0.859512	1	1	1
cellular_component	GO:0009538	photosystem I reaction center	0	5	0	0.471957	1	1	1
molecular_function	GO:0004802	transketolase activity	0	1	0	0.85962	1	1	1
biological_process	GO:0006098	pentose-phosphate shunt	0	3	0	0.139446	1	1	1
molecular_function	GO:0070290	N-acylphosphatidylethanolamine-specific phospholipase D activity	0	1	0	0.85962	1	1	1
molecular_function	GO:0030295	protein kinase activator activity	0	4	0	0.256125	1	1	1
cellular_component	GO:0030134	COPII-coated ER to Golgi transport vesicle	0	9	0	0.869315	0.257499	1	1
molecular_function	GO:0047326	inositol tetrakisphosphate 5-kinase activity	0	1	0	0.85962	1	1	1
molecular_function	GO:0051765	inositol tetrakisphosphate kinase activity	0	1	0	0.90277	0.454023	1	1
molecular_function	GO:0008440	inositol-1,4,5-trisphosphate 3-kinase activity	0	1	0	0.85962	1	1	1
molecular_function	GO:0000823	inositol-1,4,5-trisphosphate 6-kinase activity	0	1	0	0.85962	1	1	1
molecular_function	GO:0102732	myo-inositol-1,2,3,4,6-heptakisphosphate 5-kinase activity	0	1	0	0.85962	1	1	1
biological_process	GO:0071702	organic substance transport	0	2	0	0.00305281	0.998096	0.369	1
biological_process	GO:0043087	regulation of GTPase activity	0	2	0	0.645878	0.644009	1	1
biological_process	GO:0042274	ribosomal small subunit biogenesis	0	5	0	0.00155811	0.999853	0.22	1
biological_process	GO:0070863	positive regulation of protein exit from endoplasmic reticulum	0	1	0	0.859512	1	1	1
biological_process	GO:0003400	regulation of COPII vesicle coating	0	2	0	0.738742	1	1	1
biological_process	GO:0016050	vesicle organization	0	1	0	0.685084	0.473205	1	1
biological_process	GO:0000461	endonucleolytic cleavage to generate mature 3'-end of SSU-rRNA from (SSU-rRNA, 5.8S rRNA, LSU-rRNA)	0	1	0	0.859512	1	1	1
cellular_component	GO:0005960	glycine cleavage complex	0	2	0	0.740605	1	1	1
molecular_function	GO:0016594	glycine binding	0	1	0	0.85962	1	1	1
molecular_function	GO:0004375	glycine dehydrogenase (decarboxylating) activity	0	1	0	0.85962	1	1	1
biological_process	GO:0019464	glycine decarboxylation via glycine cleavage system	0	3	0	0.634925	1	1	1
molecular_function	GO:0004637	phosphoribosylamine-glycine ligase activity	0	3	0	0.635175	1	1	1
molecular_function	GO:0004641	phosphoribosylformylglycinamidine cyclo-ligase activity	0	1	0	0.85962	1	1	1
biological_process	GO:0046084	adenine biosynthetic process	0	1	0	0.738742	1	1	1
biological_process	GO:0006164	purine nucleotide biosynthetic process	0	5	0	0.999914	0.000199341	1	0.074
molecular_function	GO:0004427	inorganic diphosphatase activity	0	4	0	0.545977	1	1	1
molecular_function	GO:0009678	pyrophosphate hydrolysis-driven proton transmembrane transporter activity	0	1	0	0.951824	0.148554	1	1
molecular_function	GO:0016717	oxidoreductase activity, acting on paired donors, with oxidation of a pair of donors resulting in the reduction of molecular oxygen to two molecules of water	0	9	0	0.120093	1	1	1
biological_process	GO:0044255	cellular lipid metabolic process	0	18	0	1.74248e-07	1	0	1
molecular_function	GO:0032041	NAD-dependent histone deacetylase activity (H3-K14 specific)	0	14	0	0.120093	1	1	1
molecular_function	GO:0052691	UDP-arabinopyranose mutase activity	0	1	0	0.85962	1	1	1
biological_process	GO:0071555	cell wall organization	0	7	0	0.0759922	1	1	1
biological_process	GO:0009832	plant-type cell wall biogenesis	0	1	0	0.162289	1	1	1
biological_process	GO:0033356	UDP-L-arabinose metabolic process	0	1	0	0.859512	1	1	1
molecular_function	GO:0004400	histidinol-phosphate transaminase activity	0	1	0	0.85962	1	1	1
molecular_function	GO:0003995	acyl-CoA dehydrogenase activity	0	2	0	0.738932	1	1	1
molecular_function	GO:0008470	isovaleryl-CoA dehydrogenase activity	0	1	0	0.85962	1	1	1
molecular_function	GO:0004750	D-ribulose-phosphate 3-epimerase activity	0	2	0	0.738932	1	1	1
biological_process	GO:0019323	pentose catabolic process	0	2	0	0.545684	1	1	1
[truncated: 2,160 more rows]
[truncated: 338 more columns]

## Sheet: polyQ
GO domain	GO ID	GO term	polyQ protein	total number	number / total	raw p-value under-representation	raw p-value over-representation	FWER under-representation	FWER over-representation	Gene Name
cellular_component	GO:0016021	integral component of membrane	802	2821	0.284296	0.000120491	0.999901	0.011	1	YCF78_CHLRE	A0A2K3CR29_CHLRE	A8HPX4_CHLRE	A8JD31_CHLRE	A8J425_CHLRE	A0A2K3DF75_CHLRE	A8J6C7_CHLRE	A0A2K3D1I5_CHLRE	A0A2K3DR15_CHLRE	A2I2U7_CHLRE	A8JGH0_CHLRE	A8IHE9_CHLRE	A8IC56_CHLRE	A0A2K3DG46_CHLRE	A0A2K3DE39_CHLRE	A8IDP1_CHLRE	Q39583_CHLRE	A0A2K3DW91_CHLRE	A8JB30_CHLRE	Q8RUT8_CHLRE	A0A2K3DIX8_CHLRE	A8J071_CHLRE	A0A2K3DYY2_CHLRE	A0A2K3DL67_CHLRE	A0A2K3DA11_CHLRE	A0A2K3DX94_CHLRE	A8IQZ8_CHLRE	A0A2K3DSK0_CHLRE	A8HXF2_CHLRE	A8JHM5_CHLRE	A8JD41_CHLRE	A0A2K3DRC9_CHLRE	A0A2K3D7U2_CHLRE	A0A2K3CRT5_CHLRE	A0A2K3D3K7_CHLRE	A0A2K3DF96_CHLRE	A0A2K3E3K8_CHLRE	A0A2K3E3G9_CHLRE	A0A2K3DJ21_CHLRE	A0A2K3E151_CHLRE
molecular_function	GO:0005524	ATP binding	563	1465	0.3843	1	3.07274e-08	1	0	A0A2K3CQ32_CHLRE	A8J6C7_CHLRE	A0A2K3D1I5_CHLRE	A8IRA4_CHLRE	A0A2K3E304_CHLRE	A8JGU7_CHLRE	A0A2K3DV28_CHLRE	Q6UPR4_CHLRE	A8JGJ4_CHLRE	A8J0W2_CHLRE	A0A2K3DW91_CHLRE	A8JCQ8_CHLRE	A0A2K3DIX8_CHLRE	A0A2K3DFN5_CHLRE	A0A2K3E7L9_CHLRE	A0A2K3DP88_CHLRE	A8I3N6_CHLRE	A0A2K3D1C6_CHLRE	A8ILK6_CHLRE	A8IU95_CHLRE	A0A2K3D7U2_CHLRE	A0A2K3CRT5_CHLRE	A0A2K3DAX3_CHLRE	A0A2K3DXM3_CHLRE	A0A2K3E5N6_CHLRE	A0A2K3DTG3_CHLRE	A0A2K3D3N5_CHLRE	A0A2K3DC12_CHLRE	A0A2K3E716_CHLRE	A0A2K3DIC1_CHLRE	A0A2K3DCL3_CHLRE	A0A2K3DJB1_CHLRE	A0A2K3DS51_CHLRE	A0A2K3DEW9_CHLRE	A0A2K3DUU2_CHLRE	A0A2K3DUE2_CHLRE	A0A2K3DNU1_CHLRE	A0A2K3DD36_CHLRE	A0A2K3DF85_CHLRE	A0A2K3DWM0_CHLRE
cellular_component	GO:0005634	nucleus	552	1201	0.459617	1	1.91512e-34	1	0	Q50H72_CHLRE	A0A2K3DGV5_CHLRE	A8J936_CHLRE	A0A2K3DGU5_CHLRE	A0A2K3D4W8_CHLRE	B1B5J6_CHLRE	A0A0U2Q5E3_CHLRE	A8IIC5_CHLRE	A8IYY8_CHLRE	A0A098_CHLRE	A8HZJ8_CHLRE	A8J3F0_CHLRE	A0A2K3E304_CHLRE	A0A2K3DPY0_CHLRE	B1B5J3_CHLRE	A8IHA8_CHLRE	A8JGJ4_CHLRE	A8JFI1_CHLRE	A0A2K3DM47_CHLRE	A0A2K3DI67_CHLRE	A0A2K3DBB2_CHLRE	A0A2K3DP88_CHLRE	A0A2K3DU19_CHLRE	A8I904_CHLRE	A8IWH5_CHLRE	A8HY72_CHLRE	A0A2K3CU12_CHLRE	A0A2K3DXG3_CHLRE	A0A2K3DYU9_CHLRE	A0A2K3DC12_CHLRE	A0A2K3D1W7_CHLRE	A0A2K3CSY6_CHLRE	A0A2K3DXT9_CHLRE	A0A2K3E6P6_CHLRE	A0A2K3D9Y5_CHLRE	A0A2K3DIC1_CHLRE	A0A2K3CS30_CHLRE	A0A2K3CY40_CHLRE	A0A2K3DVK6_CHLRE	A0A2K3D8T2_CHLRE
cellular_component	GO:0005737	cytoplasm	455	1425	0.319298	3.53469e-25	1	0	1	POC16_CHLRE	POB15_CHLRE	A8J7K3_CHLRE	Q4U0V8_CHLRE	B1B5J5_CHLRE	A0A2K3DJW4_CHLRE	A8IX59_CHLRE	A8IWN9_CHLRE	A8JGJ4_CHLRE	A8JCX4_CHLRE	A8IHL1_CHLRE	A0A2K3DIX8_CHLRE	A8JFI1_CHLRE	A0A2K3DFN5_CHLRE	A0A2K3E7L9_CHLRE	A0A2K3DP88_CHLRE	Q9SWH3_CHLRE	A8IU95_CHLRE	A0A2K3DT63_CHLRE	A0A2K3D211_CHLRE	A0A2K3DZF6_CHLRE	A0A2K3DC12_CHLRE	A0A2K3CSY6_CHLRE	A0A2K3DIC1_CHLRE	A0A2K3CZA3_CHLRE	A0A2K3CNM6_CHLRE	A0A2K3DTW2_CHLRE	A0A2K3DYE1_CHLRE	A0A2K3DHX0_CHLRE	A0A2K3D2Q0_CHLRE	A0A2K3DUE2_CHLRE	A0A2K3CWM1_CHLRE	A0A2K3CYD6_CHLRE	A0A2K3DF85_CHLRE	A0A2K3DZ66_CHLRE	A0A2K3CQY8_CHLRE	A0A2K3DF38_CHLRE	A0A2K3E5D4_CHLRE	A0A2K3CU59_CHLRE	A0A2K3DFE2_CHLRE
molecular_function	GO:0046872	metal ion binding	293	780	0.375641	0.775397	0.243687	1	1	Q50H72_CHLRE	A0A2K3DGV8_CHLRE	A0A0U2Q5E3_CHLRE	A8JCX3_CHLRE	A0A2K3DLJ5_CHLRE	A8HX36_CHLRE	A0A141CN33_CHLRE	E0YRV5_CHLRE	A0A2K3CNP6_CHLRE	A0A2K3E0S8_CHLRE	A0A2K3DYU9_CHLRE	A0A2K3DFB6_CHLRE	A0A2K3E3K8_CHLRE	A0A2K3D1W7_CHLRE	A0A2K3E050_CHLRE	A0A2K3CXV7_CHLRE	A0A2K3DDK3_CHLRE	A0A2K3DF58_CHLRE	A0A2K3DHA4_CHLRE	A0A2K3E2Y5_CHLRE	A0A2K3CQX7_CHLRE	A0A2K3DLA8_CHLRE	A0A2K3CXM9_CHLRE	A0A2K3DN29_CHLRE	A0A2K3CVK8_CHLRE	A0A2K3E2U1_CHLRE	A0A2K3DPE5_CHLRE	A0A2K3DWL5_CHLRE	A0A2K3CQ68_CHLRE	A0A2K3CYG6_CHLRE	A0A2K3DU88_CHLRE	A0A2K3DHY7_CHLRE	A0A2K3CVD8_CHLRE	A0A2K3D8C6_CHLRE	A0A2K3DTY3_CHLRE	A0A2K3DSI1_CHLRE	A0A2K3E4S0_CHLRE	A0A2K3D4L9_CHLRE	A0A2K3E0V0_CHLRE	A0A2K3CQG3_CHLRE
molecular_function	GO:0004672	protein kinase activity	226	428	0.528037	1	1.18694e-27	1	0	A0A2K3CQ32_CHLRE	A0A2K3D1I5_CHLRE	A0A2K3DV28_CHLRE	Q6UPR4_CHLRE	A8J0W2_CHLRE	A0A2K3DW91_CHLRE	A0A2K3E1N8_CHLRE	A0A2K3DIX8_CHLRE	A0A2K3DFN5_CHLRE	A0A2K3E7L9_CHLRE	A8I3N6_CHLRE	A0A2K3D1C6_CHLRE	A8IU95_CHLRE	A0A2K3D7U2_CHLRE	A0A2K3CRT5_CHLRE	A0A2K3DTG3_CHLRE	A0A2K3DCL3_CHLRE	A0A2K3DF85_CHLRE	A0A2K3DF38_CHLRE	A0A2K3CU59_CHLRE	A0A2K3D9G2_CHLRE	A0A2K3DDM9_CHLRE	A0A2K3DLE2_CHLRE	A0A2K3CN86_CHLRE	A0A2K3CNE7_CHLRE	A0A2K3E2R6_CHLRE	A0A2K3E775_CHLRE	A0A2K3DD28_CHLRE	A0A2K3D8W8_CHLRE	A0A2K3CWU5_CHLRE	A0A2K3DHY9_CHLRE	A0A2K3CP24_CHLRE	A0A2K3DRM4_CHLRE	A0A2K3DQZ1_CHLRE	A0A2K3E4W3_CHLRE	A0A2K3E8H4_CHLRE	A0A2K3E4B3_CHLRE	A0A2K3DHY8_CHLRE	A0A2K3DK62_CHLRE	A0A2K3CUC2_CHLRE
molecular_function	GO:0004674	protein serine/threonine kinase activity	221	413	0.535109	1	3.37532e-21	1	0	A0A2K3CQ32_CHLRE	A8IRA4_CHLRE	A8J0W2_CHLRE	A0A2K3DW91_CHLRE	A0A2K3DIX8_CHLRE	A0A2K3DFN5_CHLRE	A0A2K3D1C6_CHLRE	A8ILK6_CHLRE	A0A2K3CRT5_CHLRE	A0A2K3E716_CHLRE	A0A2K3DIC1_CHLRE	A0A2K3DCL3_CHLRE	A0A2K3DS51_CHLRE	A0A2K3DJG0_CHLRE	A0A2K3DUU2_CHLRE	A0A2K3DUE2_CHLRE	A0A2K3DHA4_CHLRE	A0A2K3E5D4_CHLRE	A0A2K3CU59_CHLRE	A0A2K3D9G2_CHLRE	A0A2K3DDM9_CHLRE	A0A2K3CNE7_CHLRE	A0A2K3E1T4_CHLRE	A0A2K3DD28_CHLRE	A0A2K3D8W8_CHLRE	A0A2K3CWU5_CHLRE	A0A2K3DHY9_CHLRE	A0A2K3CP24_CHLRE	A0A2K3D8F8_CHLRE	A0A2K3CS15_CHLRE	A0A2K3DRM4_CHLRE	A0A2K3DYA1_CHLRE	A0A2K3DQZ1_CHLRE	A0A2K3E4W3_CHLRE	A0A2K3E8H4_CHLRE	A0A2K3DE59_CHLRE	A0A2K3DHY8_CHLRE	A0A2K3DK62_CHLRE	A0A2K3D9G0_CHLRE	A0A2K3E6S6_CHLRE
molecular_function	GO:0003723	RNA binding	171	459	0.372549	0.575087	0.456087	1	1	A0A2K3D0I4_CHLRE	A8J9J7_CHLRE	A8J144_CHLRE	A8IQ91_CHLRE	A8I029_CHLRE	A8IBU6_CHLRE	A0A2K3CSS2_CHLRE	A0A2K3CND3_CHLRE	A0A2K3CWB9_CHLRE	A0A2K3DCZ3_CHLRE	A0A2K3CS30_CHLRE	A0A2K3E6I5_CHLRE	A0A2K3DA13_CHLRE	A0A2K3DK03_CHLRE	A0A2K3CSM4_CHLRE	A0A2K3DUD3_CHLRE	A0A2K3D6A9_CHLRE	A0A2K3D1H3_CHLRE	A0A2K3DDN8_CHLRE	A0A2K3E0K0_CHLRE	A0A2K3E140_CHLRE	A0A2K3DKJ5_CHLRE	A0A2K3DLE6_CHLRE	A0A2K3CWS6_CHLRE	A0A2K3D4L9_CHLRE	A0A2K3DE07_CHLRE	A0A2K3CWQ8_CHLRE	A0A2K3DDL6_CHLRE	A0A2K3D8T1_CHLRE	A0A2K3DPN5_CHLRE	A0A2K3CWP5_CHLRE	A0A2K3D1H4_CHLRE	A0A2K3CZ00_CHLRE	A0A2K3DLB1_CHLRE	A0A2K3DVR7_CHLRE	A0A2K3CNE6_CHLRE	A0A2K3DHL2_CHLRE	A0A2K3DQD0_CHLRE	A0A2K3CZ19_CHLRE	A0A2K3D3U1_CHLRE
biological_process	GO:0035556	intracellular signal transduction	171	260	0.657692	1	3.24564e-34	1	0	A8IRA4_CHLRE	A0A2K3DZK2_CHLRE	A8JGJ4_CHLRE	A0A2K3E041_CHLRE	A0A2K3DP88_CHLRE	A0A2K3D1J0_CHLRE	A0A2K3DJ21_CHLRE	A0A2K3DC12_CHLRE	A0A2K3CYJ1_CHLRE	A0A2K3DXT9_CHLRE	A0A2K3E716_CHLRE	A0A2K3DIC1_CHLRE	A0A2K3CZA3_CHLRE	A0A2K3DS51_CHLRE	A0A2K3DUE2_CHLRE	A0A2K3DMQ2_CHLRE	A0A2K3CXN5_CHLRE	A0A2K3E618_CHLRE	A0A2K3DCM3_CHLRE	A0A2K3E5B6_CHLRE	A0A2K3D668_CHLRE	A0A2K3DZC9_CHLRE	A0A2K3DVL3_CHLRE	A0A2K3E1T4_CHLRE	A0A2K3CXF1_CHLRE	A0A2K3D8F8_CHLRE	A0A2K3CS15_CHLRE	A0A2K3DZB1_CHLRE	A0A2K3E6S6_CHLRE	A0A2K3DQ34_CHLRE	A0A2K3D1R0_CHLRE	A0A2K3DL70_CHLRE	A0A2K3DQ92_CHLRE	A0A2K3D4S2_CHLRE	A0A2K3CYI7_CHLRE	A0A2K3DYE9_CHLRE	A0A2K3DMM0_CHLRE	A0A2K3E603_CHLRE	A0A2K3DL44_CHLRE	A0A2K3D9X8_CHLRE
cellular_component	GO:0016020	membrane	146	492	0.296748	0.0181326	0.983897	0.841	1	A8JD31_CHLRE	A0A2K3DK84_CHLRE	A8IZN1_CHLRE	A8HXF2_CHLRE	A0A2K3D1H8_CHLRE	A0A2K3CP22_CHLRE	A0A2K3CSG8_CHLRE	A0A2K3D863_CHLRE	A0A2K3DEG4_CHLRE	A0A2K3CX28_CHLRE	A0A2K3E7H5_CHLRE	A0A2K3CZ64_CHLRE	A0A2K3DVC1_CHLRE	A0A2K3CPV9_CHLRE	A0A2K3DWS1_CHLRE	A0A2K3DT89_CHLRE	A0A2K3DX28_CHLRE	A0A2K3DSM5_CHLRE	A0A2K3E7J5_CHLRE	A0A2K3DI86_CHLRE	A0A2K3DUU4_CHLRE	A0A2K3CXR9_CHLRE	A0A2K3D0A1_CHLRE	A0A2K3DUT5_CHLRE	A0A2K3E2F8_CHLRE	A0A2K3CN09_CHLRE	A0A2K3CWM7_CHLRE	A0A2K3DYB4_CHLRE	A0A2K3CYI1_CHLRE	A0A2K3DEZ3_CHLRE	A0A2K3DX91_CHLRE	A0A2K3D652_CHLRE	A0A2K3DD99_CHLRE	A0A2K3D5H8_CHLRE	A0A2K3CWG7_CHLRE	A0A2K3E8H5_CHLRE	A0A2K3E0H1_CHLRE	A0A2K3D7Z7_CHLRE	A0A2K3DJ75_CHLRE	A0A2K3CNT8_CHLRE
molecular_function	GO:0003677	DNA binding	144	376	0.382979	1	7.74287e-16	1	0	RPOC2_CHLRE	Q50H72_CHLRE	A8IYY8_CHLRE	B1B5J3_CHLRE	A8J5X0_CHLRE	A8JFI1_CHLRE	A0A2K3DI67_CHLRE	A0A2K3DXG3_CHLRE	A0A2K3D1W7_CHLRE	A0A2K3DUG2_CHLRE	A0A2K3D4R7_CHLRE	A0A2K3CPZ5_CHLRE	A0A2K3DNU1_CHLRE	A0A2K3DD36_CHLRE	A0A2K3DDK3_CHLRE	A0A2K3E2Y5_CHLRE	A0A2K3E075_CHLRE	A0A2K3DWL5_CHLRE	A0A2K3DRN7_CHLRE	A0A2K3DP94_CHLRE	A0A2K3D8C3_CHLRE	A0A2K3E0K0_CHLRE	A0A2K3DTY3_CHLRE	A0A2K3DNL3_CHLRE	A0A2K3DSF4_CHLRE	A0A2K3E264_CHLRE	A0A2K3D4L9_CHLRE	A0A2K3CWG1_CHLRE	A0A2K3E6X2_CHLRE	A0A2K3D5X4_CHLRE	A0A2K3CU31_CHLRE	A0A2K3DA15_CHLRE	A0A2K3E6N9_CHLRE	A0A2K3E5K7_CHLRE	A0A2K3D4Z3_CHLRE	A0A2K3DV71_CHLRE	A0A2K3E0Q5_CHLRE	A0A2K3CTR8_CHLRE	A0A2K3DQ05_CHLRE	A0A2K3DIU2_CHLRE
biological_process	GO:0007165	signal transduction	117	188	0.62234	1	9.30777e-37	1	0	A0A2K3DZK2_CHLRE	A0A2K3DIX8_CHLRE	A0A2K3DFN5_CHLRE	A0A2K3E7L9_CHLRE	A0A2K3E041_CHLRE	A8IU95_CHLRE	A0A2K3D1J0_CHLRE	A0A2K3D1H8_CHLRE	A0A2K3E3K8_CHLRE	A0A2K3DJ21_CHLRE	A0A2K3CYJ1_CHLRE	A0A2K3DMQ2_CHLRE	A0A2K3DF85_CHLRE	A0A2K3CXN5_CHLRE	A0A2K3DF38_CHLRE	A0A2K3CU59_CHLRE	A0A2K3E618_CHLRE	A0A2K3E2U1_CHLRE	A0A2K3D668_CHLRE	A0A2K3DVL3_CHLRE	A0A2K3E2R6_CHLRE	A0A2K3DD28_CHLRE	A0A2K3CYI0_CHLRE	A0A2K3DS29_CHLRE	A0A2K3D5H8_CHLRE	A0A2K3D9A9_CHLRE	A0A2K3DSM8_CHLRE	A0A2K3DL70_CHLRE	A0A2K3DQ92_CHLRE	A0A2K3CYI7_CHLRE	A0A2K3E4A7_CHLRE	A0A2K3DMM0_CHLRE	A0A2K3E593_CHLRE	A0A2K3CW00_CHLRE	A0A2K3CTQ5_CHLRE	A0A2K3D1G5_CHLRE	A0A2K3D264_CHLRE	A0A2K3E1B0_CHLRE	A0A2K3CZW6_CHLRE	A0A2K3CVC1_CHLRE
cellular_component	GO:0005886	plasma membrane	113	257	0.439689	1	5.80336e-07	1	0	A0A2K3DZK2_CHLRE	A2I2U7_CHLRE	A8JGH0_CHLRE	Q8RUT8_CHLRE	A0A2K3E041_CHLRE	A0A2K3D1J0_CHLRE	A0A2K3DJ21_CHLRE	A0A2K3CYJ1_CHLRE	A0A2K3DXX2_CHLRE	A0A2K3D0H4_CHLRE	A0A2K3CZE5_CHLRE	A0A2K3DMQ2_CHLRE	A0A2K3CXN5_CHLRE	A0A2K3E618_CHLRE	A0A2K3CNS7_CHLRE	A0A2K3D668_CHLRE	A0A2K3E3R5_CHLRE	A0A2K3DTH6_CHLRE	A0A2K3DVL3_CHLRE	A0A2K3D4W0_CHLRE	A0A2K3DC10_CHLRE	A0A2K3DSM2_CHLRE	A0A2K3CRI9_CHLRE	A0A2K3DLJ0_CHLRE	A0A2K3DCX1_CHLRE	A0A2K3DY17_CHLRE	A0A2K3D6T2_CHLRE	A0A2K3DR12_CHLRE	A0A2K3DL70_CHLRE	A0A2K3DQ92_CHLRE	A0A2K3CYI7_CHLRE	A0A2K3DAP5_CHLRE	A0A2K3DMM0_CHLRE	A0A2K3CU71_CHLRE	A0A2K3DTU7_CHLRE	A0A2K3D264_CHLRE	A0A2K3CVT5_CHLRE	A0A2K3CUZ0_CHLRE	A0A2K3E1B0_CHLRE	A0A2K3D1C4_CHLRE
molecular_function	GO:0008270	zinc ion binding	91	213	0.42723	0.999506	0.000812968	1	0.196	RPOC2_CHLRE	A8ITI2_CHLRE	A8J936_CHLRE	B1B5J6_CHLRE	A0A2K3DIG0_CHLRE	A8JCX4_CHLRE	A8JB30_CHLRE	A8I904_CHLRE	A0A2K3DG76_CHLRE	A0A2K3DHR9_CHLRE	A0A2K3DSJ3_CHLRE	A0A2K3DV14_CHLRE	A0A2K3DSC4_CHLRE	A0A2K3D9I2_CHLRE	A0A2K3D851_CHLRE	A0A2K3DRJ1_CHLRE	A0A2K3D646_CHLRE	A0A2K3DEH3_CHLRE	A0A2K3D4Z3_CHLRE	A0A2K3DWD9_CHLRE	A0A2K3D7C0_CHLRE	A0A2K3DWS7_CHLRE	A0A2K3D7C3_CHLRE	A0A2K3CWW3_CHLRE	A0A2K3DP53_CHLRE	A0A2K3DEE1_CHLRE	A0A2K3DK66_CHLRE	A0A2K3E6H8_CHLRE	A0A2K3DXP3_CHLRE	A0A2K3CXG7_CHLRE	A0A2K3DYA7_CHLRE	A0A2K3E150_CHLRE	A0A2K3E0H8_CHLRE	A0A2K3DRZ9_CHLRE	A0A2K3CNA2_CHLRE	A0A2K3DWC9_CHLRE	A0A2K3D9G8_CHLRE	A0A2K3CWC5_CHLRE	A0A2K3DC48_CHLRE	A0A2K3DXV0_CHLRE
cellular_component	GO:0009507	chloroplast	85	354	0.240113	0.0157936	0.987544	0.782	1	RPOC2_CHLRE	A8JAA0_CHLRE	A8J144_CHLRE	A8IHH9_CHLRE	A8JCK3_CHLRE	A8J933_CHLRE	A0A172WYN8_CHLRE	O64927_CHLRE	A0A2K3CND3_CHLRE	A0A2K3CWB9_CHLRE	A0A2K3DCZ3_CHLRE	A0A2K3D798_CHLRE	A0A2K3DUD3_CHLRE	A0A2K3CTW3_CHLRE	A0A2K3D9U2_CHLRE	A0A2K3CWS6_CHLRE	A0A2K3DE07_CHLRE	A0A2K3CWQ8_CHLRE	A0A2K3DHQ0_CHLRE	A0A2K3CWP5_CHLRE	A0A2K3CNE6_CHLRE	A0A2K3DC63_CHLRE	A0A2K3D5I0_CHLRE	A0A2K3CWU1_CHLRE	A0A2K3D693_CHLRE	A0A2K3CND6_CHLRE	A0A2K3CYI4_CHLRE	A0A2K3DNH6_CHLRE	A0A2K3DYZ6_CHLRE	A0A2K3D721_CHLRE	A0A2K3D2Z7_CHLRE	A0A2K3CXJ9_CHLRE	A0A2K3CWT1_CHLRE	A0A2K3CVZ5_CHLRE	A0A2K3D609_CHLRE	A0A2K3DJV1_CHLRE	A0A2K3DU45_CHLRE	A0A2K3DQP9_CHLRE	A0A2K3CRQ2_CHLRE	A0A2K3D443_CHLRE
cellular_component	GO:0005783	endoplasmic reticulum	82	273	0.300366	0.00550023	0.996016	0.407	1	A0A2K3DK84_CHLRE	A8IZN1_CHLRE	A0A2K3CSG8_CHLRE	A0A2K3D863_CHLRE	A0A2K3CX28_CHLRE	A0A2K3DVC1_CHLRE	A0A2K3DSM5_CHLRE	A0A2K3CXR9_CHLRE	A0A2K3D0A1_CHLRE	A0A2K3DPR0_CHLRE	A0A2K3CWM7_CHLRE	A0A2K3DEZ3_CHLRE	A0A2K3DX91_CHLRE	A0A2K3DD99_CHLRE	A0A2K3CWG7_CHLRE	A0A2K3E8H5_CHLRE	A0A2K3DJ75_CHLRE	A0A2K3CNT8_CHLRE	A0A2K3D9Y7_CHLRE	A0A2K3DPY6_CHLRE	A0A2K3DU25_CHLRE	A0A2K3DB27_CHLRE	A0A2K3DIM7_CHLRE	A0A2K3DVZ5_CHLRE	A0A2K3E0X0_CHLRE	A0A2K3D8P1_CHLRE	A0A2K3D515_CHLRE	A0A2K3CWR9_CHLRE	A0A2K3DHK5_CHLRE	A0A2K3DHB1_CHLRE	A0A2K3DI38_CHLRE	A0A2K3DHD3_CHLRE	A0A2K3D3K2_CHLRE	A0A2K3CXY0_CHLRE	A0A2K3D7D0_CHLRE	A0A2K3DEZ4_CHLRE	A0A2K3DHB3_CHLRE	A0A2K3DU52_CHLRE	A0A2K3CWP9_CHLRE	A0A2K3CWN1_CHLRE
molecular_function	GO:0004767	sphingomyelin phosphodiesterase activity	80	176	0.454545	0.999912	0.000162111	1	0.026	A8IZN1_CHLRE	A8HPJ1_CHLRE	A0A2K3CSG8_CHLRE	A0A2K3D863_CHLRE	A0A2K3CX28_CHLRE	A0A2K3DVC1_CHLRE	A0A2K3DSM5_CHLRE	A0A2K3CXR9_CHLRE	A0A2K3D0A1_CHLRE	A0A2K3CWM7_CHLRE	A0A2K3DEZ3_CHLRE	A0A2K3DX91_CHLRE	A0A2K3DD99_CHLRE	A0A2K3D8Q1_CHLRE	A0A2K3CWG7_CHLRE	A0A2K3DW77_CHLRE	A0A2K3E8H5_CHLRE	A0A2K3DJ75_CHLRE	A0A2K3CNT8_CHLRE	A0A2K3DU25_CHLRE	A0A2K3DB27_CHLRE	A0A2K3DUU6_CHLRE	A0A2K3DVZ5_CHLRE	A0A2K3E0X0_CHLRE	A0A2K3D8P1_CHLRE	A0A2K3D515_CHLRE	A0A2K3CWR9_CHLRE	A0A2K3DDK4_CHLRE	A0A2K3DHK5_CHLRE	A0A2K3DHB1_CHLRE	A0A2K3DYP9_CHLRE	A0A2K3CWK4_CHLRE	A0A2K3D6Z7_CHLRE	A0A2K3DEZ4_CHLRE	A0A2K3DHB3_CHLRE	A0A2K3DLL8_CHLRE	A0A2K3D054_CHLRE	A0A2K3DU52_CHLRE	A0A2K3CWP9_CHLRE	A0A2K3CWN1_CHLRE
biological_process	GO:0006355	regulation of transcription, DNA-templated	79	141	0.560284	1	1.61147e-28	1	0	A8IMK5_CHLRE	A8HNG7_CHLRE	A0A2K3DA11_CHLRE	A0A2K3CU12_CHLRE	A0A2K3D1W7_CHLRE	A0A2K3DG76_CHLRE	A0A2K3DVK6_CHLRE	A0A2K3D8T2_CHLRE	A0A2K3E2T6_CHLRE	A0A2K3E7F8_CHLRE	A0A2K3DDI1_CHLRE	A0A2K3D851_CHLRE	A0A2K3CZ24_CHLRE	A0A2K3CXZ1_CHLRE	A0A2K3E330_CHLRE	A0A2K3CU31_CHLRE	A0A2K3CUP9_CHLRE	A0A2K3DQ76_CHLRE	A0A2K3DHC0_CHLRE	A0A2K3DTF3_CHLRE	A0A2K3DWD9_CHLRE	A0A2K3DNY8_CHLRE	A0A2K3DEE1_CHLRE	A0A2K3D065_CHLRE	A0A2K3E6H8_CHLRE	A0A2K3DEW7_CHLRE	A0A2K3DPP5_CHLRE	A0A2K3DWC9_CHLRE	A0A2K3DJ44_CHLRE	A0A2K3D456_CHLRE	A0A2K3E3P9_CHLRE	A0A2K3CNT5_CHLRE	A0A2K3DUP2_CHLRE	A0A2K3E7I2_CHLRE	A0A2K3DS24_CHLRE	A0A2K3D0Z1_CHLRE	A0A2K3DDP7_CHLRE	A0A2K3E5S6_CHLRE	A0A2K3DPV0_CHLRE	A0A2K3D681_CHLRE
molecular_function	GO:0016887	ATP hydrolysis activity	79	225	0.351111	0.937196	0.0758295	1	1	A8J6C7_CHLRE	A0A2K3DEW9_CHLRE	A0A2K3CWY8_CHLRE	A0A2K3D0X3_CHLRE	A0A2K3CXU2_CHLRE	A0A2K3CYE9_CHLRE	A0A2K3D4L9_CHLRE	A0A2K3CWG1_CHLRE	A0A2K3D646_CHLRE	A0A2K3DQV3_CHLRE	A0A2K3CWR1_CHLRE	A0A2K3DN16_CHLRE	A0A2K3DWY1_CHLRE	A0A2K3DFZ5_CHLRE	A0A2K3E0H1_CHLRE	A0A2K3CNX2_CHLRE	A0A2K3D249_CHLRE	A0A2K3DMH1_CHLRE	A0A2K3DGH9_CHLRE	A0A2K3DL14_CHLRE	A0A2K3CMY7_CHLRE	A0A2K3DQW5_CHLRE	A0A2K3DIP5_CHLRE	A0A2K3E630_CHLRE	A0A2K3E8E6_CHLRE	A0A2K3E199_CHLRE	A0A2K3DJH8_CHLRE	A0A2K3DU41_CHLRE	A0A2K3E7C0_CHLRE	A0A2K3CTP0_CHLRE	A0A2K3DBH8_CHLRE	A0A2K3D1W3_CHLRE	A0A2K3D295_CHLRE	A0A2K3DXU4_CHLRE	A0A2K3CUN5_CHLRE	A0A2K3DWL0_CHLRE	A0A2K3D0S0_CHLRE	A0A2K3DSR2_CHLRE	A0A2K3E5S7_CHLRE	A0A2K3DIE7_CHLRE
biological_process	GO:0006357	regulation of transcription by RNA polymerase II	75	106	0.707547	1	6.73313e-20	1	0	A0A2K3D4W8_CHLRE	A0A098_CHLRE	A8HZJ8_CHLRE	A0A2K3DBB2_CHLRE	A0A2K3DSK0_CHLRE	A8HY72_CHLRE	A0A2K3DXT9_CHLRE	A0A2K3CVE2_CHLRE	A0A2K3CNV1_CHLRE	A0A2K3D7B6_CHLRE	A0A2K3CUE4_CHLRE	A0A2K3DTB0_CHLRE	A0A2K3D666_CHLRE	A0A2K3CYN0_CHLRE	A0A2K3DS29_CHLRE	A0A2K3E264_CHLRE	A0A2K3E7W2_CHLRE	A0A2K3DLK8_CHLRE	A0A2K3D7C0_CHLRE	A0A2K3D1V9_CHLRE	A0A2K3D2K4_CHLRE	A0A2K3E5F1_CHLRE	A0A2K3DXB3_CHLRE	A0A2K3DTB1_CHLRE	A0A2K3DZA8_CHLRE	A0A2K3DSZ4_CHLRE	A0A2K3D7H3_CHLRE	A0A2K3DXA7_CHLRE	A0A2K3DH12_CHLRE	A0A2K3CRK4_CHLRE	A0A2K3DFS6_CHLRE	A0A2K3E689_CHLRE	A0A2K3CWE8_CHLRE	A0A2K3D3A1_CHLRE	A0A2K3E855_CHLRE	A0A2K3DY56_CHLRE	A0A2K3CZM9_CHLRE	A0A2K3D1C2_CHLRE	A0A2K3D8E9_CHLRE	A0A2K3D6P5_CHLRE
molecular_function	GO:0016301	kinase activity	73	123	0.593496	1	9.53303e-29	1	0	A0A2K3DLJ5_CHLRE	A0A2K3DFB6_CHLRE	A0A2K3CXV7_CHLRE	A0A2K3CQX7_CHLRE	A0A2K3D9S8_CHLRE	A0A2K3CXT9_CHLRE	A0A2K3CYG6_CHLRE	A0A2K3DSI1_CHLRE	A0A2K3E4S0_CHLRE	A0A2K3E0V0_CHLRE	A0A2K3CTB5_CHLRE	A0A2K3DUK5_CHLRE	A0A2K3D878_CHLRE	A0A2K3DI14_CHLRE	A0A2K3D800_CHLRE	A0A2K3DMU3_CHLRE	A0A2K3DMR5_CHLRE	A0A2K3DY27_CHLRE	A0A2K3DF17_CHLRE	A0A2K3CYG4_CHLRE	A0A2K3DX86_CHLRE	A0A2K3D9H5_CHLRE	A0A2K3DKP3_CHLRE	A0A2K3DF30_CHLRE	A0A2K3CYH2_CHLRE	A0A2K3DIP8_CHLRE	A0A2K3DMR8_CHLRE	A0A2K3DFR0_CHLRE	A0A2K3DKY7_CHLRE	A0A2K3DTF9_CHLRE	A0A2K3DKR7_CHLRE	A0A2K3DIB5_CHLRE	A0A2K3DIY0_CHLRE	A0A2K3CWR3_CHLRE	A0A2K3CRR0_CHLRE	A0A2K3CXU4_CHLRE	A0A2K3DFE6_CHLRE	A0A2K3CYC0_CHLRE	A0A2K3E1V9_CHLRE	A0A2K3CYK8_CHLRE
molecular_function	GO:0003700	DNA-binding transcription factor activity	69	92	0.75	1	1.41958e-33	1	0	A0A2K3DGV5_CHLRE	A0A2K3DGU5_CHLRE	A8IYY8_CHLRE	A0A2K3DPY0_CHLRE	B1B5J3_CHLRE	A8J5X0_CHLRE	Q65Z16_CHLRE	A0A2K3DI67_CHLRE	A0A2K3DU19_CHLRE	A0A2K3CVE2_CHLRE	A0A2K3DXI1_CHLRE	A0A2K3CXA8_CHLRE	A0A2K3DGS3_CHLRE	A0A2K3DSI0_CHLRE	A0A2K3D8K9_CHLRE	A0A2K3DNL3_CHLRE	A0A2K3DV71_CHLRE	A0A2K3DKU0_CHLRE	A0A2K3DGR0_CHLRE	A0A2K3E0Q5_CHLRE	A0A2K3DLK8_CHLRE	A0A2K3D7C0_CHLRE	A0A2K3D767_CHLRE	A0A2K3DGS1_CHLRE	A0A2K3DVU2_CHLRE	A0A2K3E275_CHLRE	A0A2K3DIU5_CHLRE	A0A2K3DUU0_CHLRE	A0A2K3E5F5_CHLRE	A0A2K3DBG2_CHLRE	A0A2K3D5Q1_CHLRE	A0A2K3DGR4_CHLRE	A0A2K3DFS6_CHLRE	A0A2K3DDQ8_CHLRE	A0A2K3DND3_CHLRE	A0A2K3DUS1_CHLRE	A0A2K3E4M1_CHLRE	A0A2K3DQA9_CHLRE	A0A2K3D4N7_CHLRE	A0A2K3D2M1_CHLRE
cellular_component	GO:0031969	chloroplast membrane	68	90	0.755556	1	3.77056e-13	1	0	YCF78_CHLRE	A0A2K3DLJ5_CHLRE	A0A2K3DFB6_CHLRE	A0A2K3CXV7_CHLRE	A0A2K3CQX7_CHLRE	A0A2K3CXT9_CHLRE	A0A2K3CYG6_CHLRE	A0A2K3DSI1_CHLRE	A0A2K3E4S0_CHLRE	A0A2K3E0V0_CHLRE	A0A2K3CTB5_CHLRE	A0A2K3DUK5_CHLRE	A0A2K3D878_CHLRE	A0A2K3DI14_CHLRE	A0A2K3D800_CHLRE	A0A2K3DMU3_CHLRE	A0A2K3DMR5_CHLRE	A0A2K3DF17_CHLRE	A0A2K3CYG4_CHLRE	A0A2K3DX86_CHLRE	A0A2K3D9H5_CHLRE	A0A2K3DKP3_CHLRE	A0A2K3DF30_CHLRE	A0A2K3CYH2_CHLRE	A0A2K3DIP8_CHLRE	A0A2K3DMR8_CHLRE	A0A2K3DFR0_CHLRE	A0A2K3DKY7_CHLRE	A0A2K3DTF9_CHLRE	A0A2K3DKR7_CHLRE	A0A2K3DIB5_CHLRE	A0A2K3CWR3_CHLRE	A0A2K3CRR0_CHLRE	A0A2K3CXU4_CHLRE	A0A2K3DFE6_CHLRE	A0A2K3CYC0_CHLRE	A0A2K3E1V9_CHLRE	A0A2K3CYK8_CHLRE	A0A2K3DKU6_CHLRE	A0A2K3CYG8_CHLRE
molecular_function	GO:0004620	phospholipase activity	59	136	0.433824	0.999959	7.44315e-05	1	0.004	A8IZN1_CHLRE	A0A2K3CSG8_CHLRE	A0A2K3D863_CHLRE	A0A2K3CX28_CHLRE	A0A2K3DVC1_CHLRE	A0A2K3DSM5_CHLRE	A0A2K3CXR9_CHLRE	A0A2K3D0A1_CHLRE	A0A2K3CWM7_CHLRE	A0A2K3DEZ3_CHLRE	A0A2K3DX91_CHLRE	A0A2K3DD99_CHLRE	A0A2K3CWG7_CHLRE	A0A2K3E8H5_CHLRE	A0A2K3DJ75_CHLRE	A0A2K3CNT8_CHLRE	A0A2K3DU25_CHLRE	A0A2K3DB27_CHLRE	A0A2K3DVZ5_CHLRE	A0A2K3E0X0_CHLRE	A0A2K3D8P1_CHLRE	A0A2K3D515_CHLRE	A0A2K3CWR9_CHLRE	A0A2K3DHK5_CHLRE	A0A2K3DHB1_CHLRE	A0A2K3DEZ4_CHLRE	A0A2K3DHB3_CHLRE	A0A2K3DU52_CHLRE	A0A2K3CWP9_CHLRE	A0A2K3CWN1_CHLRE	A0A2K3D6K3_CHLRE	A0A2K3DEJ3_CHLRE	A0A2K3DHE4_CHLRE	A0A2K3DF16_CHLRE	A0A2K3CWG3_CHLRE	A0A2K3CWN7_CHLRE	A0A2K3DEQ4_CHLRE	A0A2K3DXV3_CHLRE	A0A2K3D948_CHLRE	A0A2K3DB34_CHLRE
cellular_component	GO:0005829	cytosol	56	346	0.16185	6.3395e-18	1	0	1	A8ITJ1_CHLRE	A8JGU7_CHLRE	A8IHA8_CHLRE	A0A2K3DGN8_CHLRE	A0A2K3E775_CHLRE	A0A2K3DGZ2_CHLRE	A0A2K3CQR0_CHLRE	A0A2K3D634_CHLRE	A0A2K3DX48_CHLRE	A0A2K3DAB9_CHLRE	A0A2K3E109_CHLRE	A0A2K3E6P0_CHLRE	A0A2K3DUW6_CHLRE	A0A2K3DEF6_CHLRE	A0A2K3E0M9_CHLRE	A0A2K3E5E1_CHLRE	A0A2K3E7L8_CHLRE	A0A2K3CWJ7_CHLRE	A0A2K3DM03_CHLRE	A0A2K3D1J2_CHLRE	A0A2K3CWA8_CHLRE	A0A2K3DY29_CHLRE	A0A2K3DX87_CHLRE	A0A2K3E0R5_CHLRE	A0A2K3D2J2_CHLRE	A0A2K3DF32_CHLRE	A0A2K3DED9_CHLRE	A0A2K3E856_CHLRE	A0A2K3DAV8_CHLRE	A0A2K3DX85_CHLRE	A0A2K3DYD0_CHLRE	A0A2K3DVI7_CHLRE	A0A2K3DEF1_CHLRE	A0A2K3CTE2_CHLRE	A0A2K3E517_CHLRE	A0A2K3DL21_CHLRE	A0A2K3CV78_CHLRE	A0A2K3CSZ5_CHLRE	A0A2K3DHS7_CHLRE	A0A2K3CWW2_CHLRE
biological_process	GO:0046513	ceramide biosynthetic process	56	144	0.388889	0.983982	0.0244355	1	1	A8IZN1_CHLRE	A0A2K3CSG8_CHLRE	A0A2K3D863_CHLRE	A0A2K3CX28_CHLRE	A0A2K3DVC1_CHLRE	A0A2K3DSM5_CHLRE	A0A2K3CXR9_CHLRE	A0A2K3D0A1_CHLRE	A0A2K3CWM7_CHLRE	A0A2K3DEZ3_CHLRE	A0A2K3DX91_CHLRE	A0A2K3DD99_CHLRE	A0A2K3CWG7_CHLRE	A0A2K3E8H5_CHLRE	A0A2K3DJ75_CHLRE	A0A2K3CNT8_CHLRE	A0A2K3DU25_CHLRE	A0A2K3DB27_CHLRE	A0A2K3DVZ5_CHLRE	A0A2K3E0X0_CHLRE	A0A2K3D8P1_CHLRE	A0A2K3D515_CHLRE	A0A2K3DUX7_CHLRE	A0A2K3CWR9_CHLRE	A0A2K3DHK5_CHLRE	A0A2K3DHB1_CHLRE	A0A2K3DEZ4_CHLRE	A0A2K3DHB3_CHLRE	A0A2K3DNY6_CHLRE	A0A2K3DU52_CHLRE	A0A2K3CWP9_CHLRE	A0A2K3CWN1_CHLRE	A0A2K3D6K3_CHLRE	A0A2K3DEJ3_CHLRE	A0A2K3DHE4_CHLRE	A0A2K3DF16_CHLRE	A0A2K3CWG3_CHLRE	A0A2K3CWN7_CHLRE	A0A2K3DEQ4_CHLRE	A0A2K3D948_CHLRE
cellular_component	GO:0071944	cell periphery	54	131	0.412214	1	7.30262e-08	1	0	A8IZN1_CHLRE	A0A2K3CSG8_CHLRE	A0A2K3D863_CHLRE	A0A2K3CX28_CHLRE	A0A2K3DVC1_CHLRE	A0A2K3DSM5_CHLRE	A0A2K3CXR9_CHLRE	A0A2K3D0A1_CHLRE	A0A2K3CWM7_CHLRE	A0A2K3DEZ3_CHLRE	A0A2K3DX91_CHLRE	A0A2K3DD99_CHLRE	A0A2K3CWG7_CHLRE	A0A2K3E8H5_CHLRE	A0A2K3DJ75_CHLRE	A0A2K3CNT8_CHLRE	A0A2K3DU25_CHLRE	A0A2K3DB27_CHLRE	A0A2K3DVZ5_CHLRE	A0A2K3E0X0_CHLRE	A0A2K3D8P1_CHLRE	A0A2K3D515_CHLRE	A0A2K3CWR9_CHLRE	A0A2K3DHK5_CHLRE	A0A2K3DHB1_CHLRE	A0A2K3DEZ4_CHLRE	A0A2K3DHB3_CHLRE	A0A2K3DU52_CHLRE	A0A2K3CWP9_CHLRE	A0A2K3CWN1_CHLRE	A0A2K3D6K3_CHLRE	A0A2K3DEJ3_CHLRE	A0A2K3DHE4_CHLRE	A0A2K3DF16_CHLRE	A0A2K3CWG3_CHLRE	A0A2K3CWN7_CHLRE	A0A2K3DEQ4_CHLRE	A0A2K3D948_CHLRE	A0A2K3DB34_CHLRE	A0A2K3D950_CHLRE
biological_process	GO:0030149	sphingolipid catabolic process	54	132	0.409091	0.9961	0.00655108	1	0.94	A8IZN1_CHLRE	A0A2K3CSG8_CHLRE	A0A2K3D863_CHLRE	A0A2K3CX28_CHLRE	A0A2K3DVC1_CHLRE	A0A2K3DSM5_CHLRE	A0A2K3CXR9_CHLRE	A0A2K3D0A1_CHLRE	A0A2K3CWM7_CHLRE	A0A2K3DEZ3_CHLRE	A0A2K3DX91_CHLRE	A0A2K3DD99_CHLRE	A0A2K3CWG7_CHLRE	A0A2K3E8H5_CHLRE	A0A2K3DJ75_CHLRE	A0A2K3CNT8_CHLRE	A0A2K3DU25_CHLRE	A0A2K3DB27_CHLRE	A0A2K3DVZ5_CHLRE	A0A2K3E0X0_CHLRE	A0A2K3D8P1_CHLRE	A0A2K3D515_CHLRE	A0A2K3CWR9_CHLRE	A0A2K3DHK5_CHLRE	A0A2K3DHB1_CHLRE	A0A2K3DEZ4_CHLRE	A0A2K3DHB3_CHLRE	A0A2K3DU52_CHLRE	A0A2K3CWP9_CHLRE	A0A2K3CWN1_CHLRE	A0A2K3D6K3_CHLRE	A0A2K3DEJ3_CHLRE	A0A2K3DHE4_CHLRE	A0A2K3DF16_CHLRE	A0A2K3CWG3_CHLRE	A0A2K3CWN7_CHLRE	A0A2K3DEQ4_CHLRE	A0A2K3D948_CHLRE	A0A2K3DB34_CHLRE	A0A2K3D950_CHLRE
biological_process	GO:0009190	cyclic nucleotide biosynthetic process	54	68	0.794118	1	1.25956e-30	1	0	A0A2K3DXT9_CHLRE	A0A2K3DZC9_CHLRE	A0A2K3CXF1_CHLRE	A0A2K3DZB1_CHLRE	A0A2K3D8G4_CHLRE	A0A2K3DYE9_CHLRE	A0A2K3E603_CHLRE	A0A2K3D504_CHLRE	A0A2K3D1J3_CHLRE	A0A2K3DLM7_CHLRE	A0A2K3DKX7_CHLRE	A0A2K3DGE9_CHLRE	A0A2K3DB70_CHLRE	A0A2K3CYI6_CHLRE	A0A2K3DDI4_CHLRE	A0A2K3E6E7_CHLRE	A0A2K3E282_CHLRE	A0A2K3DHJ0_CHLRE	A0A2K3E6Y2_CHLRE	A0A2K3DZ98_CHLRE	A0A2K3DC65_CHLRE	A0A2K3DXD8_CHLRE	A0A2K3CWZ0_CHLRE	A0A2K3CVA6_CHLRE	A0A2K3DLN4_CHLRE	A0A2K3DII6_CHLRE	A0A2K3D7N7_CHLRE	A0A2K3E165_CHLRE	A0A2K3D535_CHLRE	A0A2K3DN94_CHLRE	A0A2K3DYX1_CHLRE	A0A2K3DAY1_CHLRE	A0A2K3CQV5_CHLRE	A0A2K3DZA2_CHLRE	A0A2K3D7K1_CHLRE	A0A2K3DQP5_CHLRE	A0A2K3E0J0_CHLRE	A0A2K3DJT8_CHLRE	A0A2K3E5P8_CHLRE	A0A2K3E2G0_CHLRE
molecular_function	GO:0003729	mRNA binding	51	125	0.408	0.982978	0.0262427	1	1	A0A2K3DJW4_CHLRE	A0A172WYN8_CHLRE	A0A2K3DHX0_CHLRE	A0A2K3D496_CHLRE	A0A2K3CV04_CHLRE	A0A2K3CPA3_CHLRE	A0A2K3CNL9_CHLRE	A0A2K3CYY4_CHLRE	A0A2K3DBZ4_CHLRE	A0A2K3CWY3_CHLRE	A0A2K3E1R0_CHLRE	A0A2K3DEK5_CHLRE	A0A2K3D2S9_CHLRE	A0A2K3E683_CHLRE	A0A2K3CXT8_CHLRE	A0A2K3DBK7_CHLRE	A0A2K3E6E3_CHLRE	A0A2K3CR70_CHLRE	A0A2K3E457_CHLRE	A0A2K3E3U2_CHLRE	A0A2K3DBU8_CHLRE	A0A2K3E4P5_CHLRE	A0A2K3CS58_CHLRE	A0A2K3D4R1_CHLRE	A0A2K3D0F3_CHLRE	A0A2K3DQ82_CHLRE	A0A2K3E6B7_CHLRE	A0A2K3CW83_CHLRE	A0A2K3D6L9_CHLRE	A0A2K3D0N2_CHLRE	A0A2K3DR41_CHLRE	A0A2K3DRY0_CHLRE	A0A2K3DWB2_CHLRE	A0A2K3CQK5_CHLRE	A0A2K3DC97_CHLRE	A0A2K3CYR6_CHLRE	A0A2K3DEE7_CHLRE	A0A2K3D962_CHLRE	A0A2K3DIA8_CHLRE	A0A2K3DQM1_CHLRE
molecular_function	GO:0004383	guanylate cyclase activity	51	68	0.75	1	5.34009e-13	1	0	A0A2K3DZK2_CHLRE	A0A2K3E041_CHLRE	A0A2K3D1J0_CHLRE	A0A2K3DJ21_CHLRE	A0A2K3CYJ1_CHLRE	A0A2K3CZA3_CHLRE	A0A2K3DMQ2_CHLRE	A0A2K3CXN5_CHLRE	A0A2K3E618_CHLRE	A0A2K3D668_CHLRE	A0A2K3DVL3_CHLRE	A0A2K3DL70_CHLRE	A0A2K3DQ92_CHLRE	A0A2K3CYI7_CHLRE	A0A2K3DMM0_CHLRE	A0A2K3D264_CHLRE	A0A2K3E1B0_CHLRE	A0A2K3CZW6_CHLRE	A0A2K3D1K0_CHLRE	A0A2K3D1H5_CHLRE	A0A2K3E290_CHLRE	A0A2K3E1E3_CHLRE	A0A2K3CYK6_CHLRE	A0A2K3D4L1_CHLRE	A0A2K3CW68_CHLRE	A0A2K3CXQ6_CHLRE	A0A2K3CU48_CHLRE	A0A2K3DMM2_CHLRE	A0A2K3CXH0_CHLRE	A0A2K3CV76_CHLRE	A0A2K3DFR6_CHLRE	A0A2K3DUF6_CHLRE	A0A2K3D178_CHLRE	A0A2K3D6D7_CHLRE	A0A2K3CUZ3_CHLRE	A0A2K3D9W4_CHLRE	A0A2K3DS75_CHLRE	A0A2K3DC27_CHLRE	A0A2K3CYJ3_CHLRE	A0A2K3DJD5_CHLRE
molecular_function	GO:0001653	peptide receptor activity	49	61	0.803279	1	1.32617e-14	1	0	A0A2K3DZK2_CHLRE	A0A2K3E041_CHLRE	A0A2K3D1J0_CHLRE	A0A2K3DJ21_CHLRE	A0A2K3CYJ1_CHLRE	A0A2K3DMQ2_CHLRE	A0A2K3CXN5_CHLRE	A0A2K3E618_CHLRE	A0A2K3D668_CHLRE	A0A2K3DVL3_CHLRE	A0A2K3DL70_CHLRE	A0A2K3DQ92_CHLRE	A0A2K3CYI7_CHLRE	A0A2K3DMM0_CHLRE	A0A2K3D264_CHLRE	A0A2K3E1B0_CHLRE	A0A2K3CZW6_CHLRE	A0A2K3D1K0_CHLRE	A0A2K3D1H5_CHLRE	A0A2K3E290_CHLRE	A0A2K3E1E3_CHLRE	A0A2K3CYK6_CHLRE	A0A2K3D4L1_CHLRE	A0A2K3CW68_CHLRE	A0A2K3CXQ6_CHLRE	A0A2K3DMM2_CHLRE	A0A2K3CXH0_CHLRE	A0A2K3CV76_CHLRE	A0A2K3DFR6_CHLRE	A0A2K3DUF6_CHLRE	A0A2K3D178_CHLRE	A0A2K3D6D7_CHLRE	A0A2K3CUZ3_CHLRE	A0A2K3D9W4_CHLRE	A0A2K3DS75_CHLRE	A0A2K3DC27_CHLRE	A0A2K3CYJ3_CHLRE	A0A2K3DJD5_CHLRE	A0A2K3D3W8_CHLRE	A0A2K3D194_CHLRE
biological_process	GO:0006182	cGMP biosynthetic process	49	61	0.803279	1	2.35709e-15	1	0	A0A2K3DZK2_CHLRE	A0A2K3E041_CHLRE	A0A2K3D1J0_CHLRE	A0A2K3DJ21_CHLRE	A0A2K3CYJ1_CHLRE	A0A2K3DMQ2_CHLRE	A0A2K3CXN5_CHLRE	A0A2K3E618_CHLRE	A0A2K3D668_CHLRE	A0A2K3DVL3_CHLRE	A0A2K3DL70_CHLRE	A0A2K3DQ92_CHLRE	A0A2K3CYI7_CHLRE	A0A2K3DMM0_CHLRE	A0A2K3D264_CHLRE	A0A2K3E1B0_CHLRE	A0A2K3CZW6_CHLRE	A0A2K3D1K0_CHLRE	A0A2K3D1H5_CHLRE	A0A2K3E290_CHLRE	A0A2K3E1E3_CHLRE	A0A2K3CYK6_CHLRE	A0A2K3D4L1_CHLRE	A0A2K3CW68_CHLRE	A0A2K3CXQ6_CHLRE	A0A2K3DMM2_CHLRE	A0A2K3CXH0_CHLRE	A0A2K3CV76_CHLRE	A0A2K3DFR6_CHLRE	A0A2K3DUF6_CHLRE	A0A2K3D178_CHLRE	A0A2K3D6D7_CHLRE	A0A2K3CUZ3_CHLRE	A0A2K3D9W4_CHLRE	A0A2K3DS75_CHLRE	A0A2K3DC27_CHLRE	A0A2K3CYJ3_CHLRE	A0A2K3DJD5_CHLRE	A0A2K3D3W8_CHLRE	A0A2K3D194_CHLRE
biological_process	GO:0007168	receptor guanylyl cyclase signaling pathway	49	61	0.803279	1	2.35709e-15	1	0	A0A2K3DZK2_CHLRE	A0A2K3E041_CHLRE	A0A2K3D1J0_CHLRE	A0A2K3DJ21_CHLRE	A0A2K3CYJ1_CHLRE	A0A2K3DMQ2_CHLRE	A0A2K3CXN5_CHLRE	A0A2K3E618_CHLRE	A0A2K3D668_CHLRE	A0A2K3DVL3_CHLRE	A0A2K3DL70_CHLRE	A0A2K3DQ92_CHLRE	A0A2K3CYI7_CHLRE	A0A2K3DMM0_CHLRE	A0A2K3D264_CHLRE	A0A2K3E1B0_CHLRE	A0A2K3CZW6_CHLRE	A0A2K3D1K0_CHLRE	A0A2K3D1H5_CHLRE	A0A2K3E290_CHLRE	A0A2K3E1E3_CHLRE	A0A2K3CYK6_CHLRE	A0A2K3D4L1_CHLRE	A0A2K3CW68_CHLRE	A0A2K3CXQ6_CHLRE	A0A2K3DMM2_CHLRE	A0A2K3CXH0_CHLRE	A0A2K3CV76_CHLRE	A0A2K3DFR6_CHLRE	A0A2K3DUF6_CHLRE	A0A2K3D178_CHLRE	A0A2K3D6D7_CHLRE	A0A2K3CUZ3_CHLRE	A0A2K3D9W4_CHLRE	A0A2K3DS75_CHLRE	A0A2K3DC27_CHLRE	A0A2K3CYJ3_CHLRE	A0A2K3DJD5_CHLRE	A0A2K3D3W8_CHLRE	A0A2K3D194_CHLRE
cellular_component	GO:0005759	mitochondrial matrix	48	109	0.440367	0.918147	0.111036	1	1	A8J144_CHLRE	A0A2K3CND3_CHLRE	A0A2K3CWB9_CHLRE	A0A2K3DCZ3_CHLRE	A0A2K3E3Y6_CHLRE	A0A2K3DUD3_CHLRE	A0A2K3CWS6_CHLRE	A0A2K3DE07_CHLRE	A0A2K3CWQ8_CHLRE	A0A2K3CWP5_CHLRE	A0A2K3CNE6_CHLRE	A0A2K3CWU1_CHLRE	A0A2K3CND6_CHLRE	A0A2K3DNH6_CHLRE	A0A2K3DYZ6_CHLRE	A0A2K3D2Z7_CHLRE	A0A2K3CXJ9_CHLRE	A0A2K3CWT1_CHLRE	A0A2K3DJV1_CHLRE	A0A2K3E2R3_CHLRE	A0A2K3DAY3_CHLRE	A0A2K3CWN3_CHLRE	A0A2K3CWT5_CHLRE	A0A2K3CWT3_CHLRE	A0A2K3CWQ5_CHLRE	A0A2K3CWN8_CHLRE	A0A2K3D0X0_CHLRE	A0A2K3CWT2_CHLRE	A0A2K3DYG9_CHLRE	A0A2K3E349_CHLRE	A0A2K3DE22_CHLRE	A0A2K3DAJ3_CHLRE	A0A2K3CWT7_CHLRE	A0A2K3CWT6_CHLRE	A0A2K3CWN9_CHLRE	A0A2K3CZC2_CHLRE	A0A2K3DPT0_CHLRE	A0A2K3D7K4_CHLRE	A0A2K3E3Q7_CHLRE	A0A2K3CWU3_CHLRE
molecular_function	GO:0003676	nucleic acid binding	47	150	0.313333	1	2.13661e-08	1	0	A8INP6_CHLRE	A0A2K3DAX3_CHLRE	A0A2K3DVD9_CHLRE	A0A2K3DF59_CHLRE	A0A2K3DSJ3_CHLRE	A0A2K3DBG5_CHLRE	A0A2K3D646_CHLRE	A0A2K3DZS1_CHLRE	A0A2K3E676_CHLRE	A0A2K3CRN5_CHLRE	A0A2K3DIA7_CHLRE	A0A2K3D249_CHLRE	A0A2K3CYL8_CHLRE	A0A2K3DZ41_CHLRE	A0A2K3DK60_CHLRE	A0A2K3CXG7_CHLRE	A0A2K3CZU5_CHLRE	A0A2K3CWC5_CHLRE	A0A2K3DC48_CHLRE	A0A2K3DPK2_CHLRE	A0A2K3CTK9_CHLRE	A0A2K3E2K8_CHLRE	A0A2K3E705_CHLRE	A0A2K3D959_CHLRE	A0A2K3DIB3_CHLRE	A0A2K3E8H6_CHLRE	A0A2K3DC49_CHLRE	A0A2K3D6R6_CHLRE	A0A2K3CRP0_CHLRE	A0A2K3DEQ3_CHLRE	A0A2K3DIY7_CHLRE	A0A2K3E669_CHLRE	A0A2K3E1Z7_CHLRE	A0A2K3E0R0_CHLRE	A0A2K3D0Y9_CHLRE	A0A2K3DZ32_CHLRE	A0A2K3D6R3_CHLRE	A0A2K3DB72_CHLRE	A0A2K3D356_CHLRE	A0A2K3DLM5_CHLRE
molecular_function	GO:0005509	calcium ion binding	46	187	0.245989	0.0123811	0.992054	0.916	1	A0A2K3DK84_CHLRE	A8IHH9_CHLRE	A0A2K3D2P2_CHLRE	A0A2K3D134_CHLRE	A0A2K3DLT4_CHLRE	A0A2K3E5B6_CHLRE	A0A2K3CXV2_CHLRE	A0A2K3DEV8_CHLRE	A0A2K3DIL5_CHLRE	A0A2K3DK57_CHLRE	A0A2K3E8C8_CHLRE	A0A2K3D6K7_CHLRE	A0A2K3DMP6_CHLRE	A0A2K3DBC1_CHLRE	A0A2K3E0B0_CHLRE	A0A2K3D395_CHLRE	A0A2K3CSY2_CHLRE	A0A2K3D481_CHLRE	A0A2K3DI58_CHLRE	A0A2K3CV39_CHLRE	A0A2K3E7M1_CHLRE	A0A2K3DZW1_CHLRE	A0A2K3CQR3_CHLRE	A0A2K3E537_CHLRE	A0A2K3D2V9_CHLRE	A0A2K3DIB0_CHLRE	A0A2K3E014_CHLRE	A0A2K3E4Y6_CHLRE	A0A2K3DDC5_CHLRE	A0A2K3D913_CHLRE	A0A2K3E3A3_CHLRE	A0A2K3CXQ9_CHLRE	A0A2K3D1K1_CHLRE	A0A2K3DPP0_CHLRE	A0A2K3DPN4_CHLRE	A0A2K3DR64_CHLRE	A0A2K3E0B1_CHLRE	A0A2K3CYV6_CHLRE	A0A2K3D1D4_CHLRE	A0A2K3CRD3_CHLRE
molecular_function	GO:0000981	DNA-binding transcription factor activity, RNA polymerase II-specific	45	54	0.833333	1	1.13715e-18	1	0	A0A098_CHLRE	A0A2K3CU12_CHLRE	A0A2K3DXT9_CHLRE	A0A2K3DVK6_CHLRE	A0A2K3E2T6_CHLRE	A0A2K3DDI1_CHLRE	A0A2K3D7B6_CHLRE	A0A2K3DRN7_CHLRE	A0A2K3DTB0_CHLRE	A0A2K3DS29_CHLRE	A0A2K3CXZ1_CHLRE	A0A2K3E330_CHLRE	A0A2K3CUP9_CHLRE	A0A2K3DQ76_CHLRE	A0A2K3DTF3_CHLRE	A0A2K3D7C3_CHLRE	A0A2K3D1V9_CHLRE	A0A2K3DSZ4_CHLRE	A0A2K3DEW7_CHLRE	A0A2K3DPP5_CHLRE	A0A2K3D456_CHLRE	A0A2K3E3P9_CHLRE	A0A2K3E855_CHLRE	A0A2K3DS24_CHLRE	A0A2K3D1C2_CHLRE	A0A2K3D8E9_CHLRE	A0A2K3E4Z7_CHLRE	A0A2K3CYY0_CHLRE	A0A2K3DN23_CHLRE	A0A2K3DV55_CHLRE	A0A2K3CX47_CHLRE	A0A2K3DR56_CHLRE	A0A2K3DER0_CHLRE	A0A2K3E2F1_CHLRE	A0A2K3E2X0_CHLRE	A0A2K3DYQ3_CHLRE	A0A2K3CZH3_CHLRE	A0A2K3DI50_CHLRE	A0A2K3E715_CHLRE	A0A2K3E2Y4_CHLRE
molecular_function	GO:0000978	RNA polymerase II cis-regulatory region sequence-specific DNA binding	45	52	0.865385	1	6.39205e-16	1	0	A0A098_CHLRE	A0A2K3CU12_CHLRE	A0A2K3DVK6_CHLRE	A0A2K3E2T6_CHLRE	A0A2K3DDI1_CHLRE	A0A2K3D7B6_CHLRE	A0A2K3DTB0_CHLRE	A0A2K3DS29_CHLRE	A0A2K3CXZ1_CHLRE	A0A2K3E330_CHLRE	A0A2K3CUP9_CHLRE	A0A2K3DQ76_CHLRE	A0A2K3DTF3_CHLRE	A0A2K3DLK8_CHLRE	A0A2K3D7C3_CHLRE	A0A2K3D1V9_CHLRE	A0A2K3D2K4_CHLRE	A0A2K3DSZ4_CHLRE	A0A2K3DEW7_CHLRE	A0A2K3DPP5_CHLRE	A0A2K3D456_CHLRE	A0A2K3E3P9_CHLRE	A0A2K3E855_CHLRE	A0A2K3DS24_CHLRE	A0A2K3D1C2_CHLRE	A0A2K3D8E9_CHLRE	A0A2K3CYY0_CHLRE	A0A2K3DN23_CHLRE	A0A2K3DV55_CHLRE	A0A2K3CX47_CHLRE	A0A2K3DR56_CHLRE	A0A2K3DER0_CHLRE	A0A2K3E2F1_CHLRE	A0A2K3E2X0_CHLRE	A0A2K3DYQ3_CHLRE	A0A2K3CZH3_CHLRE	A0A2K3DI50_CHLRE	A0A2K3D7N0_CHLRE	A0A2K3E715_CHLRE	A0A2K3DEE3_CHLRE
biological_process	GO:0018105	peptidyl-serine phosphorylation	45	98	0.459184	0.999309	0.00139158	1	0.417	A8JGJ4_CHLRE	A0A2K3DP88_CHLRE	A8ILK6_CHLRE	A0A2K3DC12_CHLRE	A0A2K3DJG0_CHLRE	A0A2K3E5D4_CHLRE	A0A2K3DCM3_CHLRE	A0A2K3E5B6_CHLRE	A0A2K3DE59_CHLRE	A0A2K3E369_CHLRE	A0A2K3DL44_CHLRE	A0A2K3D8Q5_CHLRE	A0A2K3D082_CHLRE	A0A2K3CRD4_CHLRE	A0A2K3DCP6_CHLRE	A0A2K3DUT0_CHLRE	A0A2K3E426_CHLRE	A0A2K3DI58_CHLRE	A0A2K3DUT6_CHLRE	A0A2K3E3Q1_CHLRE	A0A2K3E308_CHLRE	A0A2K3D697_CHLRE	A0A2K3D8S5_CHLRE	A0A2K3D3V2_CHLRE	A0A2K3D0T3_CHLRE	A0A2K3E014_CHLRE	A0A2K3DWY3_CHLRE	A0A2K3DC24_CHLRE	A0A2K3DUS8_CHLRE	A0A2K3CWE4_CHLRE	A0A2K3DPE2_CHLRE	A0A2K3CSP3_CHLRE	A0A2K3D913_CHLRE	A0A2K3CW49_CHLRE	A0A2K3CZI0_CHLRE	A0A2K3DI28_CHLRE	A0A2K3CUH9_CHLRE	A0A2K3D006_CHLRE	A0A2K3DA31_CHLRE	A0A2K3DKN0_CHLRE
cellular_component	GO:0035770	ribonucleoprotein granule	42	72	0.583333	0.999998	4.67684e-06	1	0	A8J144_CHLRE	A0A2K3CND3_CHLRE	A0A2K3CWB9_CHLRE	A0A2K3DCZ3_CHLRE	A0A2K3DUD3_CHLRE	A0A2K3CWS6_CHLRE	A0A2K3DE07_CHLRE	A0A2K3CWQ8_CHLRE	A0A2K3CWP5_CHLRE	A0A2K3CNE6_CHLRE	A0A2K3CWU1_CHLRE	A0A2K3CND6_CHLRE	A0A2K3DNH6_CHLRE	A0A2K3DYZ6_CHLRE	A0A2K3D2Z7_CHLRE	A0A2K3CXJ9_CHLRE	A0A2K3CWT1_CHLRE	A0A2K3DJV1_CHLRE	A0A2K3E2R3_CHLRE	A0A2K3CWN3_CHLRE	A0A2K3CWT5_CHLRE	A0A2K3CWT3_CHLRE	A0A2K3CWQ5_CHLRE	A0A2K3CWN8_CHLRE	A0A2K3D0X0_CHLRE	A0A2K3CWT2_CHLRE	A0A2K3DYG9_CHLRE	A0A2K3E349_CHLRE	A0A2K3DE22_CHLRE	A0A2K3DAJ3_CHLRE	A0A2K3CWT7_CHLRE	A0A2K3CWT6_CHLRE	A0A2K3CWN9_CHLRE	A0A2K3CZC2_CHLRE	A0A2K3D7K4_CHLRE	A0A2K3E3Q7_CHLRE	A0A2K3CWU3_CHLRE	A0A2K3CQV1_CHLRE	A0A2K3CR95_CHLRE	A0A2K3CV32_CHLRE
biological_process	GO:1901259	chloroplast rRNA processing	42	72	0.583333	1	1.48026e-06	1	0	A8J144_CHLRE	A0A2K3CND3_CHLRE	A0A2K3CWB9_CHLRE	A0A2K3DCZ3_CHLRE	A0A2K3DUD3_CHLRE	A0A2K3CWS6_CHLRE	A0A2K3DE07_CHLRE	A0A2K3CWQ8_CHLRE	A0A2K3CWP5_CHLRE	A0A2K3CNE6_CHLRE	A0A2K3CWU1_CHLRE	A0A2K3CND6_CHLRE	A0A2K3DNH6_CHLRE	A0A2K3DYZ6_CHLRE	A0A2K3D2Z7_CHLRE	A0A2K3CXJ9_CHLRE	A0A2K3CWT1_CHLRE	A0A2K3DJV1_CHLRE	A0A2K3E2R3_CHLRE	A0A2K3CWN3_CHLRE	A0A2K3CWT5_CHLRE	A0A2K3CWT3_CHLRE	A0A2K3CWQ5_CHLRE	A0A2K3CWN8_CHLRE	A0A2K3D0X0_CHLRE	A0A2K3CWT2_CHLRE	A0A2K3DYG9_CHLRE	A0A2K3E349_CHLRE	A0A2K3DE22_CHLRE	A0A2K3DAJ3_CHLRE	A0A2K3CWT7_CHLRE	A0A2K3CWT6_CHLRE	A0A2K3CWN9_CHLRE	A0A2K3CZC2_CHLRE	A0A2K3D7K4_CHLRE	A0A2K3E3Q7_CHLRE	A0A2K3CWU3_CHLRE	A0A2K3CQV1_CHLRE	A0A2K3CR95_CHLRE	A0A2K3CV32_CHLRE
biological_process	GO:0000963	mitochondrial RNA processing	42	72	0.583333	1	1.11369e-06	1	0	A8J144_CHLRE	A0A2K3CND3_CHLRE	A0A2K3CWB9_CHLRE	A0A2K3DCZ3_CHLRE	A0A2K3DUD3_CHLRE	A0A2K3CWS6_CHLRE	A0A2K3DE07_CHLRE	A0A2K3CWQ8_CHLRE	A0A2K3CWP5_CHLRE	A0A2K3CNE6_CHLRE	A0A2K3CWU1_CHLRE	A0A2K3CND6_CHLRE	A0A2K3DNH6_CHLRE	A0A2K3DYZ6_CHLRE	A0A2K3D2Z7_CHLRE	A0A2K3CXJ9_CHLRE	A0A2K3CWT1_CHLRE	A0A2K3DJV1_CHLRE	A0A2K3E2R3_CHLRE	A0A2K3CWN3_CHLRE	A0A2K3CWT5_CHLRE	A0A2K3CWT3_CHLRE	A0A2K3CWQ5_CHLRE	A0A2K3CWN8_CHLRE	A0A2K3D0X0_CHLRE	A0A2K3CWT2_CHLRE	A0A2K3DYG9_CHLRE	A0A2K3E349_CHLRE	A0A2K3DE22_CHLRE	A0A2K3DAJ3_CHLRE	A0A2K3CWT7_CHLRE	A0A2K3CWT6_CHLRE	A0A2K3CWN9_CHLRE	A0A2K3CZC2_CHLRE	A0A2K3D7K4_CHLRE	A0A2K3E3Q7_CHLRE	A0A2K3CWU3_CHLRE	A0A2K3CQV1_CHLRE	A0A2K3CR95_CHLRE	A0A2K3CV32_CHLRE
biological_process	GO:0044528	regulation of mitochondrial mRNA stability	42	72	0.583333	1	1.48026e-06	1	0	A8J144_CHLRE	A0A2K3CND3_CHLRE	A0A2K3CWB9_CHLRE	A0A2K3DCZ3_CHLRE	A0A2K3DUD3_CHLRE	A0A2K3CWS6_CHLRE	A0A2K3DE07_CHLRE	A0A2K3CWQ8_CHLRE	A0A2K3CWP5_CHLRE	A0A2K3CNE6_CHLRE	A0A2K3CWU1_CHLRE	A0A2K3CND6_CHLRE	A0A2K3DNH6_CHLRE	A0A2K3DYZ6_CHLRE	A0A2K3D2Z7_CHLRE	A0A2K3CXJ9_CHLRE	A0A2K3CWT1_CHLRE	A0A2K3DJV1_CHLRE	A0A2K3E2R3_CHLRE	A0A2K3CWN3_CHLRE	A0A2K3CWT5_CHLRE	A0A2K3CWT3_CHLRE	A0A2K3CWQ5_CHLRE	A0A2K3CWN8_CHLRE	A0A2K3D0X0_CHLRE	A0A2K3CWT2_CHLRE	A0A2K3DYG9_CHLRE	A0A2K3E349_CHLRE	A0A2K3DE22_CHLRE	A0A2K3DAJ3_CHLRE	A0A2K3CWT7_CHLRE	A0A2K3CWT6_CHLRE	A0A2K3CWN9_CHLRE	A0A2K3CZC2_CHLRE	A0A2K3D7K4_CHLRE	A0A2K3E3Q7_CHLRE	A0A2K3CWU3_CHLRE	A0A2K3CQV1_CHLRE	A0A2K3CR95_CHLRE	A0A2K3CV32_CHLRE
molecular_function	GO:0061630	ubiquitin protein ligase activity	41	72	0.569444	0.999982	4.95701e-05	1	0.001	A8JCX3_CHLRE	A0A141CN33_CHLRE	A0A2K3CSW3_CHLRE	A0A2K3DI69_CHLRE	A0A2K3DWL5_CHLRE	A0A2K3CVY2_CHLRE	A0A2K3DAB9_CHLRE	A0A2K3DT04_CHLRE	A0A2K3D502_CHLRE	A0A2K3E5J0_CHLRE	A0A2K3E665_CHLRE	A0A2K3CWW3_CHLRE	A0A2K3DW99_CHLRE	A0A2K3DP53_CHLRE	A0A2K3E150_CHLRE	A0A2K3DV87_CHLRE	A0A2K3DRZ9_CHLRE	A0A2K3DT65_CHLRE	A0A2K3DLA7_CHLRE	A0A2K3D147_CHLRE	A0A2K3DM03_CHLRE	A0A2K3CUF0_CHLRE	A0A2K3DNA3_CHLRE	A0A2K3D4S1_CHLRE	A0A2K3E4D2_CHLRE	A0A2K3E5Y4_CHLRE	A0A2K3CS42_CHLRE	A0A2K3CUE8_CHLRE	A0A2K3D6R6_CHLRE	A0A2K3E253_CHLRE	A0A2K3DP44_CHLRE	A0A2K3CUC1_CHLRE	A0A2K3DVB5_CHLRE	A0A2K3DTG6_CHLRE	A0A2K3DTW0_CHLRE	A0A2K3D6R3_CHLRE	A0A2K3CZZ2_CHLRE	A0A2K3D0E6_CHLRE	A0A2K3DQH3_CHLRE	A0A2K3DNY2_CHLRE
molecular_function	GO:0003682	chromatin binding	41	57	0.719298	1	3.00377e-09	1	0	A0A2K3DLE8_CHLRE	A0A2K3D1W7_CHLRE	A0A2K3E6P6_CHLRE	A0A2K3DG76_CHLRE	A0A2K3DFV4_CHLRE	A0A2K3CNX5_CHLRE	A0A2K3D3S2_CHLRE	A0A2K3D007_CHLRE	A0A2K3D0Z9_CHLRE	A0A2K3DQ05_CHLRE	A0A2K3E3R6_CHLRE	A0A2K3DMH1_CHLRE	A0A2K3E6C0_CHLRE	A0A2K3DLN8_CHLRE	A0A2K3D3Q9_CHLRE	A0A2K3DYP3_CHLRE	A0A2K3D5W6_CHLRE	A0A2K3CWH5_CHLRE	A0A2K3E7C0_CHLRE	A0A2K3E6H5_CHLRE	A0A2K3DEK7_CHLRE	A0A2K3CZP9_CHLRE	A0A2K3DFQ1_CHLRE	A0A2K3DBH8_CHLRE	A0A2K3E4D2_CHLRE	A0A2K3DEM7_CHLRE	A0A2K3E5Y3_CHLRE	A0A2K3DF94_CHLRE	A0A2K3E133_CHLRE	A0A2K3DFH1_CHLRE	A0A2K3D0J1_CHLRE	A0A2K3CRF0_CHLRE	A0A2K3D7X0_CHLRE	A0A2K3DTW0_CHLRE	A0A2K3D7N0_CHLRE	A0A2K3DLN6_CHLRE	A0A2K3E1Q3_CHLRE	A0A2K3D586_CHLRE	A0A2K3DFF6_CHLRE	A0A2K3CV21_CHLRE
molecular_function	GO:0008017	microtubule binding	40	99	0.40404	0.951809	0.0727771	1	1	A0A2K3DJB1_CHLRE	A0A2K3D2P2_CHLRE	A0A2K3D0X3_CHLRE	A0A2K3D8V9_CHLRE	A0A2K3CWR1_CHLRE	A0A2K3DWY1_CHLRE	A0A2K3DFZ5_CHLRE	A0A2K3E8C8_CHLRE	A0A2K3CYR5_CHLRE	A0A2K3CZG7_CHLRE	A0A2K3E7Y4_CHLRE	A0A2K3E630_CHLRE	A0A2K3E8E6_CHLRE	A0A2K3DJH8_CHLRE	A0A2K3CV39_CHLRE	A0A2K3DA00_CHLRE	A0A2K3CU60_CHLRE	A0A2K3CQR3_CHLRE	A0A2K3CRK3_CHLRE	A0A2K3DWL0_CHLRE	A0A2K3D0S0_CHLRE	A0A2K3DSR2_CHLRE	A0A2K3CUA8_CHLRE	A0A2K3E8E5_CHLRE	A0A2K3CNE1_CHLRE	A0A2K3DAZ6_CHLRE	A0A2K3E5K1_CHLRE	A0A2K3CU18_CHLRE	A0A2K3DBK4_CHLRE	A0A2K3DWK7_CHLRE	A0A2K3CRT3_CHLRE	A0A2K3E741_CHLRE	A0A2K3DZA7_CHLRE	A0A2K3DZP9_CHLRE	A0A2K3DNX1_CHLRE	A0A2K3CVQ1_CHLRE	A0A2K3DQ91_CHLRE	A0A2K3D1P0_CHLRE	A0A2K3DC11_CHLRE	A0A2K3E2B6_CHLRE
biological_process	GO:0000724	double-strand break repair via homologous recombination	39	62	0.629032	1	7.86844e-11	1	0	A0A2K3E3G9_CHLRE	A0A2K3DUT4_CHLRE	A0A2K3CQ68_CHLRE	A0A2K3CPN9_CHLRE	A0A2K3D140_CHLRE	A0A2K3CWU4_CHLRE	A0A2K3DU39_CHLRE	A0A2K3DRR2_CHLRE	A0A2K3CYW3_CHLRE	A0A2K3DUX9_CHLRE	A0A2K3DRP5_CHLRE	A0A2K3DP30_CHLRE	A0A2K3E2V0_CHLRE	A0A2K3CWC5_CHLRE	A0A2K3CVM5_CHLRE	A0A2K3DMU9_CHLRE	A0A2K3DXZ9_CHLRE	A0A2K3DUR0_CHLRE	A0A2K3D4E3_CHLRE	A0A2K3D618_CHLRE	A0A2K3E280_CHLRE	A0A2K3D993_CHLRE	A0A2K3DRK4_CHLRE	A0A2K3DK49_CHLRE	A0A2K3DMZ0_CHLRE	A0A2K3D356_CHLRE	A0A2K3DAG5_CHLRE	A0A2K3DU69_CHLRE	A0A2K3E1Q3_CHLRE	A0A2K3CZF6_CHLRE	A0A2K3DLE0_CHLRE	A0A2K3DUQ2_CHLRE	A0A2K3E4T5_CHLRE	A0A2K3DDR6_CHLRE	A0A2K3CT62_CHLRE	A0A2K3DAG6_CHLRE	A0A2K3DUC8_CHLRE	A0A2K3DL26_CHLRE	A0A2K3D275_CHLRE
cellular_component	GO:0005739	mitochondrion	38	249	0.15261	5.49604e-09	1	0	1	A8ITI2_CHLRE	A8JGU7_CHLRE	A8I2I8_CHLRE	A0A2K3DZG5_CHLRE	A0A2K3CSV9_CHLRE	A0A2K3CVZ2_CHLRE	A0A2K3D0Y5_CHLRE	A0A2K3E1I1_CHLRE	A0A2K3DA89_CHLRE	A0A2K3DGH9_CHLRE	A0A2K3DK66_CHLRE	A0A2K3CS72_CHLRE	A0A2K3DUS0_CHLRE	A0A2K3DNT9_CHLRE	A0A2K3D0M3_CHLRE	A0A2K3CPL6_CHLRE	A0A2K3E5D1_CHLRE	A0A2K3DHM3_CHLRE	A0A2K3DPA2_CHLRE	A0A2K3D3S3_CHLRE	A0A2K3CYZ1_CHLRE	A0A2K3CZ39_CHLRE	A0A2K3CZ17_CHLRE	A0A2K3D061_CHLRE	A0A2K3CWR4_CHLRE	A0A2K3CWR0_CHLRE	A0A2K3D1C8_CHLRE	A0A2K3DGD3_CHLRE	A0A2K3DD73_CHLRE	A0A2K3D5I7_CHLRE	A0A2K3E7B1_CHLRE	A0A2K3E417_CHLRE	A0A2K3E604_CHLRE	A0A2K3DBG6_CHLRE	A0A2K3E1Z0_CHLRE	A0A2K3DND5_CHLRE	A8HYW3_CHLRE	A0A2K3E7N0_CHLRE
biological_process	GO:0006281	DNA repair	38	72	0.527778	1	6.4357e-16	1	0	A8J441_CHLRE	A0A2K3CYK0_CHLRE	A0A2K3DZG9_CHLRE	A0A2K3D4L9_CHLRE	A0A2K3D646_CHLRE	A0A2K3DKX6_CHLRE	A0A2K3E6Z2_CHLRE	A0A2K3DLL0_CHLRE	A0A2K3D249_CHLRE	A0A2K3CMY7_CHLRE	A0A2K3DYP3_CHLRE	A0A2K3DTE2_CHLRE	A0A2K3CWC5_CHLRE	A0A2K3DCB3_CHLRE	A0A2K3DFP6_CHLRE	A0A2K3DQM5_CHLRE	A0A2K3DWG0_CHLRE	A0A2K3D663_CHLRE	A0A2K3D1T7_CHLRE	A0A2K3CUX7_CHLRE	A0A2K3DTR0_CHLRE	A0A2K3DUS4_CHLRE	A0A2K3CW35_CHLRE	A0A2K3DWH4_CHLRE	A0A2K3CYI3_CHLRE	A0A2K3E4L1_CHLRE	A0A2K3DFQ9_CHLRE	A0A2K3DSU7_CHLRE	A0A2K3D356_CHLRE	A0A2K3DU69_CHLRE	A0A2K3DP21_CHLRE	A0A2K3D1E4_CHLRE	A0A2K3D131_CHLRE	A0A2K3E138_CHLRE	A0A2K3DLI8_CHLRE	A0A2K3DPW6_CHLRE	A0A2K3D450_CHLRE	A0A2K3D275_CHLRE
cellular_component	GO:0005887	integral component of plasma membrane	36	97	0.371134	0.986848	0.0215927	1	0.954	Q8LP68_CHLRE	A0A2K3E0G1_CHLRE	A0A2K3CZT1_CHLRE	A0A2K3CYI0_CHLRE	A0A2K3DLL1_CHLRE	A0A2K3DM16_CHLRE	A0A2K3D204_CHLRE	A0A2K3D8G4_CHLRE	A0A2K3DVV6_CHLRE	A0A2K3DGB6_CHLRE	A0A2K3CR54_CHLRE	A0A2K3D4R3_CHLRE	A0A2K3D1U7_CHLRE	A0A2K3DEN8_CHLRE	A0A2K3D953_CHLRE	A0A2K3DD06_CHLRE	A0A2K3DTK4_CHLRE	A0A2K3DKM4_CHLRE	A0A2K3DJT8_CHLRE	A0A2K3E4W0_CHLRE	A0A2K3E0E4_CHLRE	A0A2K3D1V4_CHLRE	A0A2K3CVV6_CHLRE	A0A2K3E729_CHLRE	A0A2K3DPU7_CHLRE	A0A2K3CX08_CHLRE	A0A2K3E6L0_CHLRE	A0A2K3DSB6_CHLRE	A0A2K3CZ59_CHLRE	A0A2K3CP03_CHLRE	A0A2K3D5Z6_CHLRE	A0A2K3E3U6_CHLRE	A0A2K3E893_CHLRE	A0A2K3CPA5_CHLRE	A0A2K3E771_CHLRE	A0A2K3E2H7_CHLRE
molecular_function	GO:0005525	GTP binding	35	158	0.221519	0.00299609	0.99832	0.398	1	A8JCK3_CHLRE	A0A2K3CR90_CHLRE	A8J6A0_CHLRE	A0A2K3DCU4_CHLRE	A0A2K3CZA3_CHLRE	A0A2K3DHR0_CHLRE	A0A2K3DX45_CHLRE	A0A2K3DFE5_CHLRE	A0A2K3CMX8_CHLRE	A0A2K3E1I1_CHLRE	A0A2K3CWV9_CHLRE	A0A2K3DHR8_CHLRE	A0A2K3D8M7_CHLRE	A0A2K3CS72_CHLRE	A0A2K3DA00_CHLRE	A0A2K3CZ97_CHLRE	A0A2K3E5D1_CHLRE	A0A2K3D316_CHLRE	A0A2K3CU48_CHLRE	A0A2K3DAZ7_CHLRE	A0A2K3DIA3_CHLRE	A0A2K3DLG8_CHLRE	A0A2K3E517_CHLRE	A0A2K3D5B3_CHLRE	A0A2K3CMW9_CHLRE	A0A2K3DAQ2_CHLRE	A0A2K3DAP7_CHLRE	A0A2K3CTP1_CHLRE	A0A2K3DD73_CHLRE	A0A2K3D1G0_CHLRE	A0A2K3D045_CHLRE	A0A2K3CZ89_CHLRE	A0A2K3DEE6_CHLRE	A0A2K3DNI5_CHLRE	A8JGS6_CHLRE
molecular_function	GO:0016491	oxidoreductase activity	35	212	0.165094	1.58243e-34	1	0	1	A0A2K3DUX3_CHLRE	A8HXF2_CHLRE	A0A2K3DJM3_CHLRE	A0A2K3CZE3_CHLRE	A0A2K3DUW5_CHLRE	A0A2K3D634_CHLRE	A0A2K3CNM0_CHLRE	A0A2K3E216_CHLRE	A0A2K3DFK4_CHLRE	A0A2K3DZU3_CHLRE	A0A2K3CS05_CHLRE	A0A2K3D5Q1_CHLRE	A0A2K3D226_CHLRE	A0A2K3D5P6_CHLRE	A0A2K3E3C2_CHLRE	A0A2K3DJW5_CHLRE	A0A2K3DJ28_CHLRE	A0A2K3D8E7_CHLRE	A0A2K3DS39_CHLRE	A0A2K3DEF1_CHLRE	A0A2K3D5Z2_CHLRE	A0A2K3CUB3_CHLRE	A0A2K3DIW4_CHLRE	A0A2K3D5K8_CHLRE	A0A2K3CUP7_CHLRE	A0A2K3CZ17_CHLRE	A0A2K3DB37_CHLRE	A0A2K3DUW8_CHLRE	A0A2K3DNX0_CHLRE	A0A2K3DDE2_CHLRE	A0A2K3DS06_CHLRE	A0A2K3DBL6_CHLRE	A0A2K3DPA4_CHLRE	A0A2K3DR97_CHLRE	A0A2K3CZE1_CHLRE
cellular_component	GO:0005856	cytoskeleton	35	119	0.294118	0.916875	0.101528	1	1	Q9SWH3_CHLRE	A0A2K3CNM6_CHLRE	A0A2K3E0P6_CHLRE	A0A2K3DV63_CHLRE	A0A2K3DMI0_CHLRE	A0A2K3E1G8_CHLRE	A0A2K3DMI6_CHLRE	A0A2K3CUZ1_CHLRE	A0A2K3E2G5_CHLRE	A0A2K3DMF5_CHLRE	A0A2K3CUZ0_CHLRE	A0A2K3CWI5_CHLRE	A0A2K3D481_CHLRE	A0A2K3E3Q1_CHLRE	A0A2K3D5F6_CHLRE	A0A2K3D0W2_CHLRE	A0A2K3DUZ3_CHLRE	A0A2K3DY52_CHLRE	A0A2K3E2R0_CHLRE	A0A2K3DA09_CHLRE	A0A2K3DBF1_CHLRE	A0A2K3E887_CHLRE	A0A2K3D5G0_CHLRE	A0A2K3DNC8_CHLRE	A0A2K3DRQ9_CHLRE	A0A2K3DL00_CHLRE	A0A2K3E396_CHLRE	A0A2K3D0M6_CHLRE	A0A2K3D9F9_CHLRE	A0A2K3E5Y5_CHLRE	A0A2K3CRA9_CHLRE	A0A2K3D0L8_CHLRE	A0A2K3D378_CHLRE	A0A2K3CWP2_CHLRE	A0A2K3CY45_CHLRE
cellular_component	GO:0005730	nucleolus	35	124	0.282258	0.126131	0.907137	1	1	A8J9J7_CHLRE	A8I029_CHLRE	A0A2K3DA13_CHLRE	A0A2K3DAJ4_CHLRE	A0A2K3D658_CHLRE	A0A2K3DVC3_CHLRE	A0A2K3DL40_CHLRE	A0A2K3E0K0_CHLRE	A0A2K3DKX6_CHLRE	A0A2K3CZ00_CHLRE	A0A2K3CQA0_CHLRE	A0A2K3E676_CHLRE	A0A2K3E009_CHLRE	A0A2K3DB94_CHLRE	A0A2K3D8I9_CHLRE	A0A2K3DJ67_CHLRE	A0A2K3D8K1_CHLRE	A0A2K3CNG0_CHLRE	A0A2K3D080_CHLRE	A0A2K3DS41_CHLRE	A0A2K3DCP4_CHLRE	A0A2K3DKU8_CHLRE	A0A2K3D959_CHLRE	A0A2K3DU20_CHLRE	A0A2K3DMX8_CHLRE	A0A2K3CXM5_CHLRE	A0A2K3CTF1_CHLRE	A0A2K3DWL3_CHLRE	A0A2K3E5I9_CHLRE	A0A2K3DPR8_CHLRE	A0A2K3CMR1_CHLRE	A0A2K3DFK0_CHLRE	A0A2K3D2H5_CHLRE	A8HXG8_CHLRE	A0A2K3E018_CHLRE
biological_process	GO:0016567	protein ubiquitination	35	72	0.486111	0.975397	0.0375809	1	1	A0A2K3DI69_CHLRE	A0A2K3DWL5_CHLRE	A0A2K3DAB9_CHLRE	A0A2K3D502_CHLRE	A0A2K3E6G1_CHLRE	A0A2K3E5J0_CHLRE	A0A2K3E665_CHLRE	A0A2K3CWW3_CHLRE	A0A2K3CTQ3_CHLRE	A0A2K3E150_CHLRE	A0A2K3DRZ9_CHLRE	A0A2K3DLA7_CHLRE	A0A2K3D147_CHLRE	A0A2K3DYS1_CHLRE	A0A2K3CVZ5_CHLRE	A0A2K3DNA3_CHLRE	A0A2K3CRQ2_CHLRE	A0A2K3CS42_CHLRE	A0A2K3D8N2_CHLRE	A0A2K3CZ15_CHLRE	A0A2K3CTD9_CHLRE	A0A2K3DVB5_CHLRE	A0A2K3CYE3_CHLRE	A0A2K3CYD9_CHLRE	A0A2K3CQL2_CHLRE	A0A2K3DXH4_CHLRE	A0A2K3D6R3_CHLRE	A0A2K3E7C6_CHLRE	A0A2K3E5B5_CHLRE	A0A2K3CZZ2_CHLRE	A0A2K3DXY5_CHLRE	A0A2K3D0E6_CHLRE	A0A2K3DHI4_CHLRE	A0A2K3DNY2_CHLRE	A0A2K3DAC1_CHLRE
molecular_function	GO:0043130	ubiquitin binding	34	49	0.693878	1	1.08445e-07	1	0	A8IIC5_CHLRE	A0A2K3DM47_CHLRE	A0A2K3E3G9_CHLRE	A0A2K3CW95_CHLRE	A0A2K3D140_CHLRE	A0A2K3CWU4_CHLRE	A0A2K3DU39_CHLRE	A0A2K3DRR2_CHLRE	A0A2K3CYW3_CHLRE	A0A2K3DUX9_CHLRE	A0A2K3DM82_CHLRE	A0A2K3DWB4_CHLRE	A0A2K3E2V0_CHLRE	A0A2K3DM45_CHLRE	A0A2K3DUR0_CHLRE	A0A2K3DM73_CHLRE	A0A2K3DZ28_CHLRE	A0A2K3D076_CHLRE	A0A2K3D618_CHLRE	A0A2K3DQG7_CHLRE	A0A2K3D880_CHLRE	A0A2K3CZH4_CHLRE	A0A2K3D0P9_CHLRE	A0A2K3DM57_CHLRE	A0A2K3DEQ3_CHLRE	A0A2K3E280_CHLRE	A0A2K3DIQ4_CHLRE	A0A2K3D993_CHLRE	A0A2K3DRK4_CHLRE	A0A2K3DMZ0_CHLRE	A0A2K3DUQ2_CHLRE	A0A2K3E4T5_CHLRE	A0A2K3CT62_CHLRE	A0A2K3DUC8_CHLRE
biological_process	GO:0007018	microtubule-based movement	34	79	0.43038	0.911818	0.124183	1	1	A8IJZ3_CHLRE	A0A2K3DJB1_CHLRE	A0A2K3D8D3_CHLRE	A0A2K3D0X3_CHLRE	A0A2K3CYE9_CHLRE	A0A2K3CWR1_CHLRE	A0A2K3DN16_CHLRE	A0A2K3DWY1_CHLRE	A0A2K3DFZ5_CHLRE	A0A2K3CZG7_CHLRE	A0A2K3E7Y4_CHLRE	A0A2K3E630_CHLRE	A0A2K3E8E6_CHLRE	A0A2K3DJH8_CHLRE	A0A2K3D3V2_CHLRE	A0A2K3DWL0_CHLRE	A0A2K3D0S0_CHLRE	A0A2K3DSR2_CHLRE	A0A2K3E8E5_CHLRE	A0A2K3CNE1_CHLRE	A0A2K3DAZ6_CHLRE	A0A2K3DBK4_CHLRE	A0A2K3DWK7_CHLRE	A0A2K3E6A9_CHLRE	A0A2K3CRT3_CHLRE	A0A2K3E741_CHLRE	A0A2K3DZA7_CHLRE	A0A2K3CRT6_CHLRE	A0A2K3DZP9_CHLRE	A0A2K3DQQ4_CHLRE	A0A2K3DNX1_CHLRE	A0A2K3CVQ1_CHLRE	A0A2K3D1P0_CHLRE	A0A2K3DC11_CHLRE
molecular_function	GO:0005516	calmodulin binding	34	71	0.478873	0.997903	0.00437591	1	0.722	A8JGJ4_CHLRE	A0A2K3DP88_CHLRE	A0A2K3DC12_CHLRE	A0A2K3DUG2_CHLRE	A0A2K3DCM3_CHLRE	A0A2K3E5B6_CHLRE	A0A2K3DGS1_CHLRE	A0A2K3DL44_CHLRE	A0A2K3D8Q5_CHLRE	A0A2K3CRD4_CHLRE	A0A2K3DCP6_CHLRE	A0A2K3DUT0_CHLRE	A0A2K3DND3_CHLRE	A0A2K3E426_CHLRE	A0A2K3DI58_CHLRE	A0A2K3DUT6_CHLRE	A0A2K3E308_CHLRE	A0A2K3D4N7_CHLRE	A0A2K3E014_CHLRE	A0A2K3DWY3_CHLRE	A0A2K3DC24_CHLRE	A0A2K3DUS8_CHLRE	A0A2K3DPE2_CHLRE	A0A2K3DAG2_CHLRE	A0A2K3D913_CHLRE	A0A2K3DHS7_CHLRE	A0A2K3CW49_CHLRE	A0A2K3DG07_CHLRE	A0A2K3D006_CHLRE	A0A2K3DA31_CHLRE	A0A2K3CT72_CHLRE	A0A2K3E327_CHLRE	A0A2K3DUV0_CHLRE	A0A2K3CZ40_CHLRE
biological_process	GO:0046777	protein autophosphorylation	33	64	0.515625	0.999804	0.000497655	1	0.164	A8JGJ4_CHLRE	A0A2K3DP88_CHLRE	A0A2K3DC12_CHLRE	A0A2K3DCM3_CHLRE	A0A2K3E5B6_CHLRE	A0A2K3E0G1_CHLRE	A0A2K3CZT1_CHLRE	A0A2K3DM16_CHLRE	A0A2K3D8G4_CHLRE	A0A2K3DL44_CHLRE	A0A2K3D8Q5_CHLRE	A0A2K3CR54_CHLRE	A0A2K3CRD4_CHLRE	A0A2K3DCP6_CHLRE	A0A2K3DUT0_CHLRE	A0A2K3E426_CHLRE	A0A2K3DI58_CHLRE	A0A2K3DUT6_CHLRE	A0A2K3E308_CHLRE	A0A2K3E014_CHLRE	A0A2K3DWY3_CHLRE	A0A2K3DC24_CHLRE	A0A2K3DUS8_CHLRE	A0A2K3DPE2_CHLRE	A0A2K3DJT8_CHLRE	A0A2K3D913_CHLRE	A0A2K3CW49_CHLRE	A0A2K3CX08_CHLRE	A0A2K3D006_CHLRE	A0A2K3DA31_CHLRE	A0A2K3E327_CHLRE	A0A2K3DUV0_CHLRE	A0A2K3E771_CHLRE
molecular_function	GO:0004842	ubiquitin-protein transferase activity	32	68	0.470588	0.99999	1.96472e-05	1	0	A0A2K3D062_CHLRE	A0A2K3CVK8_CHLRE	A0A2K3D6D9_CHLRE	A0A2K3DDL6_CHLRE	A0A2K3CU61_CHLRE	A0A2K3DIG8_CHLRE	A0A2K3DBE0_CHLRE	A0A2K3E5T1_CHLRE	A0A2K3D2T9_CHLRE	A0A2K3CU26_CHLRE	A0A2K3D4W4_CHLRE	A0A2K3D3Y4_CHLRE	A0A2K3CVM5_CHLRE	A0A2K3DGR8_CHLRE	A0A2K3D1C2_CHLRE	A0A2K3DV50_CHLRE	A0A2K3DV65_CHLRE	A0A2K3E766_CHLRE	A0A2K3CVK3_CHLRE	A0A2K3D8X8_CHLRE	A0A2K3CP90_CHLRE	A0A2K3DAN7_CHLRE	A0A2K3CPB7_CHLRE	A0A2K3CWF8_CHLRE	A0A2K3DAQ2_CHLRE	A0A2K3DAP7_CHLRE	A0A2K3E7C6_CHLRE	A0A2K3CRZ3_CHLRE	A0A2K3DK49_CHLRE	A0A2K3DE94_CHLRE	A0A2K3CWF5_CHLRE	A0A2K3DB25_CHLRE
biological_process	GO:0016579	protein deubiquitination	31	55	0.563636	1	2.00434e-07	1	0	A8IYV9_CHLRE	A0A2K3E3G9_CHLRE	A0A2K3DSQ8_CHLRE	A0A2K3D2Q9_CHLRE	A0A2K3CX46_CHLRE	A0A2K3D140_CHLRE	A0A2K3CWU4_CHLRE	A0A2K3DU39_CHLRE	A0A2K3DRR2_CHLRE	A0A2K3CYW3_CHLRE	A0A2K3DUX9_CHLRE	A0A2K3E6P0_CHLRE	A0A2K3E0M9_CHLRE	A0A2K3E5E1_CHLRE	A0A2K3DMX5_CHLRE	A0A2K3E2V0_CHLRE	A0A2K3DDE7_CHLRE	A0A2K3DUR0_CHLRE	A0A2K3DYD0_CHLRE	A0A2K3D4Z4_CHLRE	A0A2K3D618_CHLRE	A0A2K3E280_CHLRE	A0A2K3D993_CHLRE	A0A2K3DRK4_CHLRE	A0A2K3DMZ0_CHLRE	A0A2K3CUN3_CHLRE	A0A2K3DUQ2_CHLRE	A0A2K3E0J5_CHLRE	A0A2K3E4T5_CHLRE	A0A2K3CT62_CHLRE	A0A2K3DUC8_CHLRE
biological_process	GO:0006511	ubiquitin-dependent protein catabolic process	31	76	0.407895	0.999196	0.00126529	1	0.403	A0A2K3DJV5_CHLRE	A0A2K3DSQ8_CHLRE	A0A2K3CSW3_CHLRE	A0A2K3DI69_CHLRE	A0A2K3CX46_CHLRE	A0A2K3CVY2_CHLRE	A0A2K3DAB9_CHLRE	A0A2K3DT04_CHLRE	A0A2K3DBV0_CHLRE	A0A2K3CWW3_CHLRE	A0A2K3DW99_CHLRE	A0A2K3E6P0_CHLRE	A0A2K3E0M9_CHLRE	A0A2K3DRZ9_CHLRE	A0A2K3E5E1_CHLRE	A0A2K3DT65_CHLRE	A0A2K3D9Q5_CHLRE	A0A2K3DMX5_CHLRE	A0A2K3CWJ7_CHLRE	A0A2K3DNA3_CHLRE	A0A2K3DX87_CHLRE	A0A2K3E5Y4_CHLRE	A0A2K3DYD0_CHLRE	A0A2K3D4Z4_CHLRE	A0A2K3D880_CHLRE	A0A2K3DVB5_CHLRE	A0A2K3DTG6_CHLRE	A0A2K3D6R3_CHLRE	A0A2K3CZZ2_CHLRE	A0A2K3E0J5_CHLRE	A0A2K3DAC1_CHLRE
molecular_function	GO:0004712	protein serine/threonine/tyrosine kinase activity	29	72	0.402778	0.929211	0.109948	1	1	A8JGJ4_CHLRE	A0A2K3DP88_CHLRE	A0A2K3DC12_CHLRE	A0A2K3DUU2_CHLRE	A0A2K3DCM3_CHLRE	A0A2K3DYA1_CHLRE	A0A2K3CSI9_CHLRE	A0A2K3D170_CHLRE	A0A2K3CZ56_CHLRE	A0A2K3CRD4_CHLRE	A0A2K3DUT6_CHLRE	A0A2K3E3Q1_CHLRE	A0A2K3E308_CHLRE	A0A2K3E377_CHLRE	A0A2K3DWY3_CHLRE	A0A2K3DC24_CHLRE	A0A2K3CZ50_CHLRE	A0A2K3DGG4_CHLRE	A0A2K3D589_CHLRE	A0A2K3DUS8_CHLRE	A0A2K3DPE2_CHLRE	A0A2K3CW49_CHLRE	A0A2K3D006_CHLRE	A0A2K3DA31_CHLRE	A0A2K3DKN0_CHLRE	A0A2K3E327_CHLRE	A0A2K3DUV0_CHLRE	A0A2K3DCC3_CHLRE	A0A2K3DCM7_CHLRE
cellular_component	GO:0005874	microtubule	29	90	0.322222	0.712636	0.358121	1	1	A0A2K3D8D3_CHLRE	A0A2K3D479_CHLRE	A0A2K3D0X3_CHLRE	A0A2K3CYE9_CHLRE	A0A2K3CWR1_CHLRE	A0A2K3DN16_CHLRE	A0A2K3DWY1_CHLRE	A0A2K3DFZ5_CHLRE	A0A2K3E630_CHLRE	A0A2K3E8E6_CHLRE	A0A2K3DJH8_CHLRE	A0A2K3DA00_CHLRE	A0A2K3DWL0_CHLRE	A0A2K3D0S0_CHLRE	A0A2K3DSR2_CHLRE	A0A2K3E8E5_CHLRE	A0A2K3CNE1_CHLRE	A0A2K3DAZ6_CHLRE	A0A2K3DKX5_CHLRE	A0A2K3DBK4_CHLRE	A0A2K3E3I9_CHLRE	A0A2K3CRT3_CHLRE	A0A2K3E741_CHLRE	A0A2K3E647_CHLRE	A0A2K3DZP9_CHLRE	A0A2K3DQQ4_CHLRE	A0A2K3DNX1_CHLRE	A0A2K3D1P0_CHLRE	A0A2K3DC11_CHLRE
molecular_function	GO:0016787	hydrolase activity	29	126	0.230159	0.629191	0.393777	1	1	A0A2K3D184_CHLRE	A0A2K3DXM3_CHLRE	A0A2K3E676_CHLRE	A0A2K3DNF2_CHLRE	A0A2K3D1K3_CHLRE	A0A2K3DWS4_CHLRE	A0A2K3CTK9_CHLRE	A0A2K3E175_CHLRE	A0A2K3CNF8_CHLRE	A0A2K3D959_CHLRE	A0A2K3DXM4_CHLRE	A0A2K3DNC1_CHLRE	A0A2K3DC80_CHLRE	A0A2K3D1I2_CHLRE	A0A2K3D6X9_CHLRE	A0A2K3DX35_CHLRE	A0A2K3DZT7_CHLRE	A0A2K3DB37_CHLRE	A0A2K3D6Z4_CHLRE	A0A2K3DQ74_CHLRE	A0A2K3DPR8_CHLRE	A0A2K3DU69_CHLRE	A0A2K3E443_CHLRE	A0A2K3DXP5_CHLRE	A0A2K3DU97_CHLRE	A0A2K3DQE6_CHLRE	A0A2K3CY49_CHLRE	A0A2K3DY69_CHLRE	A0A2K3DGV1_CHLRE
biological_process	GO:0006468	protein phosphorylation	28	59	0.474576	0.999999	2.86025e-06	1	0	A8IRA4_CHLRE	A0A2K3E304_CHLRE	A0A2K3E716_CHLRE	A0A2K3DS51_CHLRE	A0A2K3DWM0_CHLRE	A0A2K3DLE3_CHLRE	A0A2K3D8F8_CHLRE	A0A2K3D1M9_CHLRE	A0A2K3DR74_CHLRE	A0A2K3E6S6_CHLRE	A0A2K3D1R0_CHLRE	A0A2K3CWN0_CHLRE	A0A2K3E862_CHLRE	A0A2K3E5P4_CHLRE	A0A2K3DTW3_CHLRE	A0A2K3DC99_CHLRE	A0A2K3D5B0_CHLRE	A0A2K3CPE6_CHLRE	A0A2K3CNW6_CHLRE	A0A2K3E864_CHLRE	A0A2K3DLC6_CHLRE	A0A2K3DJR9_CHLRE	A0A2K3DRT5_CHLRE	A0A2K3DLF1_CHLRE	A0A2K3DJ59_CHLRE	A0A0M4M5H7_CHLRE	A8HMH1_CHLRE	A0A2K3D5H9_CHLRE
molecular_function	GO:0004252	serine-type endopeptidase activity	28	91	0.307692	0.423553	0.662715	1	1	A0A2K3DX05_CHLRE	A0A2K3CRQ3_CHLRE	A0A2K3E7H5_CHLRE	A0A2K3D6D8_CHLRE	A0A2K3D1Q8_CHLRE	A0A2K3CSW8_CHLRE	A0A2K3E7J5_CHLRE	A0A2K3DBS0_CHLRE	A0A2K3DSG4_CHLRE	A0A2K3DZK8_CHLRE	A0A2K3DN45_CHLRE	A0A2K3DC46_CHLRE	A0A2K3CQX1_CHLRE	A0A2K3CZF5_CHLRE	A0A2K3DV82_CHLRE	A0A2K3DS66_CHLRE	A0A2K3D0Q4_CHLRE	A0A2K3E7I0_CHLRE	A0A2K3DZ54_CHLRE	A0A2K3CYH5_CHLRE	A0A2K3DZN1_CHLRE	A0A2K3CSA3_CHLRE	A0A2K3CPT9_CHLRE	A0A2K3DFC3_CHLRE	A0A2K3DPT0_CHLRE	A0A2K3E7M0_CHLRE	A0A2K3DSD8_CHLRE	A0A2K3CYQ2_CHLRE
molecular_function	GO:0043565	sequence-specific DNA binding	28	41	0.682927	1	7.90917e-25	1	0	A0A2K3DGV5_CHLRE	A0A2K3DGU5_CHLRE	A0A2K3DG76_CHLRE	A0A2K3DGS3_CHLRE	A0A2K3D851_CHLRE	A0A2K3DWD9_CHLRE	A0A2K3DGR0_CHLRE	A0A2K3D7C0_CHLRE	A0A2K3DGS1_CHLRE	A0A2K3DEE1_CHLRE	A0A2K3E6H8_CHLRE	A0A2K3DUU0_CHLRE	A0A2K3DWC9_CHLRE	A0A2K3DND3_CHLRE	A0A2K3DUS1_CHLRE	A0A2K3DXG5_CHLRE	A0A2K3D0Z1_CHLRE	A0A2K3D4N7_CHLRE	A0A2K3DSF0_CHLRE	A0A2K3D5C6_CHLRE	A0A2K3DXH9_CHLRE	A0A2K3DEF3_CHLRE	A0A2K3DEE7_CHLRE	A0A2K3DAG2_CHLRE	A0A2K3DXG7_CHLRE	A0A2K3DDG7_CHLRE	A0A2K3DPI8_CHLRE	A0A2K3DHW1_CHLRE
molecular_function	GO:0106310	protein serine kinase activity	27	66	0.409091	0.946224	0.0877544	1	1	A8JGJ4_CHLRE	A0A2K3DP88_CHLRE	A0A2K3DC12_CHLRE	A0A2K3DUU2_CHLRE	A0A2K3DCM3_CHLRE	A0A2K3CSI9_CHLRE	A0A2K3D170_CHLRE	A0A2K3CZ56_CHLRE	A0A2K3CRD4_CHLRE	A0A2K3DUT6_CHLRE	A0A2K3E3Q1_CHLRE	A0A2K3E308_CHLRE	A0A2K3E377_CHLRE	A0A2K3DWY3_CHLRE	A0A2K3DC24_CHLRE	A0A2K3CZ50_CHLRE	A0A2K3DGG4_CHLRE	A0A2K3D589_CHLRE	A0A2K3DUS8_CHLRE	A0A2K3DPE2_CHLRE	A0A2K3CW49_CHLRE	A0A2K3D006_CHLRE	A0A2K3DA31_CHLRE	A0A2K3E327_CHLRE	A0A2K3DUV0_CHLRE	A0A2K3DCC3_CHLRE	A0A2K3DCM7_CHLRE
molecular_function	GO:0004843	thiol-dependent deubiquitinase	27	52	0.519231	0.998957	0.00257721	1	0.497	A8IIC5_CHLRE	A8IYV9_CHLRE	A0A2K3DM47_CHLRE	A0A2K3CSY6_CHLRE	A0A2K3DSQ8_CHLRE	A0A2K3D2Q9_CHLRE	A0A2K3CW95_CHLRE	A0A2K3CX46_CHLRE	A0A2K3DM82_CHLRE	A0A2K3E6P0_CHLRE	A0A2K3E0M9_CHLRE	A0A2K3E5E1_CHLRE	A0A2K3DMX5_CHLRE	A0A2K3DDE7_CHLRE	A0A2K3DM45_CHLRE	A0A2K3CSX7_CHLRE	A0A2K3DM73_CHLRE	A0A2K3DZ28_CHLRE	A0A2K3D076_CHLRE	A0A2K3DYD0_CHLRE	A0A2K3D4Z4_CHLRE	A0A2K3D8A8_CHLRE	A0A2K3DR81_CHLRE	A0A2K3DM57_CHLRE	A0A2K3D485_CHLRE	A0A2K3CUN3_CHLRE	A0A2K3E0J5_CHLRE
biological_process	GO:0006629	lipid metabolic process	27	95	0.284211	0.016063	0.987549	0.988	1	A0A2K3DL67_CHLRE	A0A2K3E3X4_CHLRE	A0A2K3D712_CHLRE	A0A2K3CNS0_CHLRE	A0A2K3D6C2_CHLRE	A0A2K3CNX4_CHLRE	A0A2K3DC21_CHLRE	A0A2K3E3Y4_CHLRE	A0A2K3DV73_CHLRE	A0A2K3DYG4_CHLRE	A0A2K3DL79_CHLRE	A0A2K3DRB2_CHLRE	A0A2K3D5L6_CHLRE	A0A2K3DNL2_CHLRE	A0A2K3D710_CHLRE	A0A2K3DXX8_CHLRE	A0A2K3DHT1_CHLRE	A0A2K3CW79_CHLRE	A0A2K3E247_CHLRE	A0A2K3DL75_CHLRE	A0A2K3E3Z8_CHLRE	A0A2K3CP03_CHLRE	A0A2K3E3V7_CHLRE	A0A2K3CY29_CHLRE	A0A2K3DZF8_CHLRE	A0A2K3E3Y8_CHLRE	A0A2K3DX52_CHLRE
molecular_function	GO:0005044	scavenger receptor activity	26	54	0.481481	0.994905	0.0109277	1	0.978	A0A2K3E7H5_CHLRE	A0A2K3DBP8_CHLRE	A0A2K3E7J5_CHLRE	A0A2K3DI86_CHLRE	A0A2K3CWU4_CHLRE	A0A2K3DTV2_CHLRE	A0A2K3DUX9_CHLRE	A0A2K3CPA0_CHLRE	A0A2K3E4S5_CHLRE	A0A2K3D9V6_CHLRE	A0A2K3D618_CHLRE	A0A2K3E7I0_CHLRE	A0A2K3DT68_CHLRE	A0A2K3D9V3_CHLRE	A0A2K3DBQ5_CHLRE	A0A2K3CP98_CHLRE	A0A2K3DTT7_CHLRE	A0A2K3E210_CHLRE	A0A2K3D993_CHLRE	A0A2K3DTW8_CHLRE	A0A2K3DBP7_CHLRE	A0A2K3E233_CHLRE	A0A2K3DUQ2_CHLRE	A0A2K3DI82_CHLRE	A0A2K3CT62_CHLRE	A0A2K3CP99_CHLRE
biological_process	GO:0005975	carbohydrate metabolic process	25	87	0.287356	0.000898315	0.999456	0.208	1	A0A2K3DK84_CHLRE	A0A2K3DBP8_CHLRE	A0A2K3DHY7_CHLRE	A0A2K3CTW1_CHLRE	A0A2K3CQU5_CHLRE	A0A2K3D7Z7_CHLRE	A0A2K3DKT1_CHLRE	A0A2K3DQ89_CHLRE	A0A2K3D387_CHLRE	A0A2K3D0F8_CHLRE	A0A2K3DB77_CHLRE	A0A2K3E4S5_CHLRE	A0A2K3CTX4_CHLRE	A0A2K3D2V6_CHLRE	A0A2K3CTW5_CHLRE	A0A2K3DRZ4_CHLRE	A0A2K3D370_CHLRE	A0A2K3DIB0_CHLRE	A0A2K3DJW1_CHLRE	A0A2K3DBQ5_CHLRE	A0A2K3DR64_CHLRE	A0A2K3D6X2_CHLRE	A0A2K3DBP7_CHLRE	A0A2K3DKS3_CHLRE	A0A2K3D2A2_CHLRE
molecular_function	GO:0003712	transcription coregulator activity	25	40	0.625	0.999999	3.15876e-06	1	0	A8HNG7_CHLRE	A0A2K3DSK0_CHLRE	A0A2K3CVE2_CHLRE	A0A2K3CNV1_CHLRE	A0A2K3CUE4_CHLRE	A0A2K3D666_CHLRE	A0A2K3E5F1_CHLRE	A0A2K3CRK4_CHLRE	A0A2K3CWE8_CHLRE	A0A2K3DY56_CHLRE	A0A2K3D6P5_CHLRE	A0A2K3DN88_CHLRE	A0A2K3E1P8_CHLRE	A0A2K3D0I1_CHLRE	A0A2K3DZ06_CHLRE	A0A2K3DDF7_CHLRE	A0A2K3CUC8_CHLRE	A0A2K3DU65_CHLRE	A0A2K3DEN5_CHLRE	A0A2K3DHZ0_CHLRE	A0A2K3D274_CHLRE	A0A2K3CT82_CHLRE	A0A2K3DAW9_CHLRE	A0A2K3E138_CHLRE	A0A2K3DNI2_CHLRE
cellular_component	GO:0019005	SCF ubiquitin ligase complex	25	42	0.595238	0.999969	0.000110887	1	0.016	B1B5J5_CHLRE	A0A2K3D276_CHLRE	A0A2K3DM84_CHLRE	A0A2K3DR59_CHLRE	A0A2K3DHJ9_CHLRE	A0A2K3E8A9_CHLRE	A0A2K3CTX3_CHLRE	A0A2K3CQB7_CHLRE	A0A2K3DY52_CHLRE	A0A2K3DSL7_CHLRE	A0A2K3DNS2_CHLRE	A0A2K3CXY5_CHLRE	A0A2K3D7E7_CHLRE	A0A2K3D0K9_CHLRE	A0A2K3D4D6_CHLRE	A0A2K3DDQ6_CHLRE	A0A2K3DGP0_CHLRE	A0A2K3DL00_CHLRE	A0A2K3D537_CHLRE	A0A2K3E2A6_CHLRE	A0A2K3DKX1_CHLRE	A0A2K3DQN5_CHLRE	A0A2K3CY80_CHLRE	A0A2K3CWP2_CHLRE	A0A2K3DHI4_CHLRE
biological_process	GO:0031146	SCF-dependent proteasomal ubiquitin-dependent protein catabolic process	25	42	0.595238	0.999964	0.000127756	1	0.044	B1B5J5_CHLRE	A0A2K3D276_CHLRE	A0A2K3DM84_CHLRE	A0A2K3DR59_CHLRE	A0A2K3DHJ9_CHLRE	A0A2K3E8A9_CHLRE	A0A2K3CTX3_CHLRE	A0A2K3CQB7_CHLRE	A0A2K3DY52_CHLRE	A0A2K3DSL7_CHLRE	A0A2K3DNS2_CHLRE	A0A2K3CXY5_CHLRE	A0A2K3D7E7_CHLRE	A0A2K3D0K9_CHLRE	A0A2K3D4D6_CHLRE	A0A2K3DDQ6_CHLRE	A0A2K3DGP0_CHLRE	A0A2K3DL00_CHLRE	A0A2K3D537_CHLRE	A0A2K3E2A6_CHLRE	A0A2K3DKX1_CHLRE	A0A2K3DQN5_CHLRE	A0A2K3CY80_CHLRE	A0A2K3CWP2_CHLRE	A0A2K3DHI4_CHLRE
molecular_function	GO:0003824	catalytic activity	25	88	0.284091	0.0103646	0.990879	0.855	1	A0A2K3DPE0_CHLRE	A0A2K3DEZ0_CHLRE	A0A2K3DVT0_CHLRE	A0A2K3DT17_CHLRE	A0A2K3CNB3_CHLRE	A0A2K3CTW1_CHLRE	A0A2K3D955_CHLRE	A0A2K3DHT0_CHLRE	A0A2K3CTM0_CHLRE	A0A2K3E136_CHLRE	A0A2K3DPI7_CHLRE	A0A2K3CTW5_CHLRE	A0A2K3DB13_CHLRE	A0A2K3DK34_CHLRE	A0A2K3DGB5_CHLRE	A0A2K3DYV2_CHLRE	A0A2K3CNF2_CHLRE	A0A2K3E1I7_CHLRE	A0A2K3DPC5_CHLRE	A0A2K3D0R8_CHLRE	A0A2K3DEX0_CHLRE	A0A2K3CPL0_CHLRE	A0A2K3DPD8_CHLRE	A0A2K3CPH4_CHLRE	A0A2K3E859_CHLRE
biological_process	GO:0006310	DNA recombination	25	105	0.238095	0.99963	0.000612738	1	0.202	A0A2K3DNU1_CHLRE	A0A2K3E075_CHLRE	A0A2K3D646_CHLRE	A0A2K3DA15_CHLRE	A0A2K3D249_CHLRE	A0A2K3D1K3_CHLRE	A0A2K3DFI4_CHLRE	A0A2K3CMY7_CHLRE	A0A2K3DAM6_CHLRE	A0A2K3CNA2_CHLRE	A0A2K3CWC5_CHLRE	A0A2K3D6P8_CHLRE	A0A2K3E7P8_CHLRE	A0A2K3DTR0_CHLRE	A0A2K3CW35_CHLRE	A0A2K3CQ09_CHLRE	A0A2K3E4L1_CHLRE	A0A2K3D1I3_CHLRE	A0A2K3D356_CHLRE	A0A2K3DU69_CHLRE	A0A2K3DP21_CHLRE	A0A2K3DLI8_CHLRE	A0A2K3DFV1_CHLRE	A0A2K3DYW5_CHLRE	A0A2K3D275_CHLRE
molecular_function	GO:0009931	calcium-dependent protein serine/threonine kinase activity	25	53	0.471698	0.991881	0.0168342	1	1	A8JGJ4_CHLRE	A0A2K3DP88_CHLRE	A0A2K3DC12_CHLRE	A0A2K3DCM3_CHLRE	A0A2K3E5B6_CHLRE	A0A2K3DL44_CHLRE	A0A2K3D8Q5_CHLRE	A0A2K3CRD4_CHLRE	A0A2K3DCP6_CHLRE	A0A2K3DUT0_CHLRE	A0A2K3E426_CHLRE	A0A2K3DI58_CHLRE	A0A2K3DUT6_CHLRE	A0A2K3E308_CHLRE	A0A2K3E014_CHLRE	A0A2K3DWY3_CHLRE	A0A2K3DC24_CHLRE	A0A2K3DUS8_CHLRE	A0A2K3DPE2_CHLRE	A0A2K3D913_CHLRE	A0A2K3CW49_CHLRE	A0A2K3D006_CHLRE	A0A2K3DA31_CHLRE	A0A2K3E327_CHLRE	A0A2K3DUV0_CHLRE
molecular_function	GO:0004683	calmodulin-dependent protein kinase activity	25	56	0.446429	0.981123	0.0356052	1	1	A8JGJ4_CHLRE	A0A2K3DP88_CHLRE	A0A2K3DC12_CHLRE	A0A2K3DCM3_CHLRE	A0A2K3E5B6_CHLRE	A0A2K3DL44_CHLRE	A0A2K3D8Q5_CHLRE	A0A2K3CRD4_CHLRE	A0A2K3DCP6_CHLRE	A0A2K3DUT0_CHLRE	A0A2K3E426_CHLRE	A0A2K3DI58_CHLRE	A0A2K3DUT6_CHLRE	A0A2K3E308_CHLRE	A0A2K3E014_CHLRE	A0A2K3DWY3_CHLRE	A0A2K3DC24_CHLRE	A0A2K3DUS8_CHLRE	A0A2K3DPE2_CHLRE	A0A2K3D913_CHLRE	A0A2K3CW49_CHLRE	A0A2K3D006_CHLRE	A0A2K3DA31_CHLRE	A0A2K3E327_CHLRE	A0A2K3DUV0_CHLRE
molecular_function	GO:0005506	iron ion binding	24	114	0.210526	0.00200748	0.998985	0.282	1	A8HXF2_CHLRE	A0A2K3DI95_CHLRE	A0A2K3DU66_CHLRE	A0A2K3DPR0_CHLRE	A0A2K3CPM4_CHLRE	A0A2K3DEN9_CHLRE	A0A2K3DWT1_CHLRE	A0A2K3E6C1_CHLRE	A0A2K3DWE9_CHLRE	A0A2K3CVX2_CHLRE	A0A2K3D3K2_CHLRE	A0A2K3CXY0_CHLRE	A0A2K3CTE5_CHLRE	A0A2K3CPL6_CHLRE	A0A2K3DJ81_CHLRE	A0A2K3D9L1_CHLRE	A0A2K3DLQ3_CHLRE	A0A2K3D2D8_CHLRE	A0A2K3CZ48_CHLRE	A0A2K3E1R9_CHLRE	A0A2K3E5G5_CHLRE	A0A2K3D826_CHLRE	A0A2K3E785_CHLRE	A0A2K3DWT0_CHLRE
biological_process	GO:0006886	intracellular protein transport	24	102	0.235294	0.00860377	0.994195	0.898	1	A8J6A0_CHLRE	A0A2K3DRS2_CHLRE	A0A2K3DSP0_CHLRE	A0A2K3D9Y7_CHLRE	A0A2K3DBX3_CHLRE	A0A2K3DI38_CHLRE	A0A2K3D8J7_CHLRE	A0A2K3D7D0_CHLRE	A0A2K3D316_CHLRE	A0A2K3DSP2_CHLRE	A0A2K3D1M4_CHLRE	A0A2K3CQU9_CHLRE	A0A2K3DAZ7_CHLRE	A0A2K3CPX9_CHLRE	A0A2K3D4Y4_CHLRE	A0A2K3E7U8_CHLRE	A0A2K3DQE5_CHLRE	A0A2K3E722_CHLRE	A0A2K3E5E3_CHLRE	A0A2K3E2B8_CHLRE	A0A2K3E0C8_CHLRE	A0A2K3DAX9_CHLRE	A8JBG7_CHLRE	A8J5T5_CHLRE
biological_process	GO:0006397	mRNA processing	24	43	0.55814	0.947399	0.0702955	1	1	A0A172WYN8_CHLRE	A0A2K3DHA4_CHLRE	A0A2K3DI69_CHLRE	A0A2K3DDS0_CHLRE	A0A2K3CZ19_CHLRE	A0A2K3D2S9_CHLRE	A0A2K3DBK7_CHLRE	A0A2K3DL17_CHLRE	A0A2K3CST7_CHLRE	A0A2K3DUD6_CHLRE	A0A2K3DX31_CHLRE	A0A2K3DKU7_CHLRE	A0A2K3E1C6_CHLRE	A0A2K3E1G4_CHLRE	A0A2K3E5P2_CHLRE	A0A2K3D6R6_CHLRE	A0A2K3DW67_CHLRE	A0A2K3D6R3_CHLRE	A0A2K3DL39_CHLRE	A0A2K3CZI1_CHLRE	A0A2K3E769_CHLRE	A0A2K3DC04_CHLRE	A0A2K3DH95_CHLRE	A0A2K3CV89_CHLRE
molecular_function	GO:0003777	microtubule motor activity	24	43	0.55814	0.997994	0.00443173	1	0.73	A0A2K3DJB1_CHLRE	A0A2K3D0X3_CHLRE	A0A2K3CWR1_CHLRE	A0A2K3DWY1_CHLRE	A0A2K3DFZ5_CHLRE	A0A2K3CZG7_CHLRE	A0A2K3E630_CHLRE	A0A2K3E8E6_CHLRE	A0A2K3DJH8_CHLRE	A0A2K3DWL0_CHLRE	A0A2K3D0S0_CHLRE	A0A2K3DSR2_CHLRE	A0A2K3E8E5_CHLRE	A0A2K3CNE1_CHLRE	A0A2K3DAZ6_CHLRE	A0A2K3DBK4_CHLRE	A0A2K3DWK7_CHLRE	A0A2K3CRT3_CHLRE	A0A2K3E741_CHLRE	A0A2K3DZA7_CHLRE	A0A2K3DZP9_CHLRE	A0A2K3DNX1_CHLRE	A0A2K3D1P0_CHLRE	A0A2K3DC11_CHLRE
molecular_function	GO:0003924	GTPase activity	23	113	0.20354	0.00319189	0.998406	0.427	1	A8JCK3_CHLRE	A8J6A0_CHLRE	A0A2K3DCU4_CHLRE	A0A2K3DFE5_CHLRE	A0A2K3E1I1_CHLRE	A0A2K3CWV9_CHLRE	A0A2K3DHR8_CHLRE	A0A2K3D8M7_CHLRE	A0A2K3CS72_CHLRE	A0A2K3DA00_CHLRE	A0A2K3CZ97_CHLRE	A0A2K3E5D1_CHLRE	A0A2K3D316_CHLRE	A0A2K3DAZ7_CHLRE	A0A2K3E517_CHLRE	A0A2K3CTP1_CHLRE	A0A2K3DD73_CHLRE	A0A2K3D463_CHLRE	A0A2K3D1G0_CHLRE	A0A2K3D045_CHLRE	A0A2K3CZ89_CHLRE	A0A2K3DNI5_CHLRE	A8JGS6_CHLRE
biological_process	GO:0010468	regulation of gene expression	23	44	0.522727	1	3.06745e-32	1	0	A0A2K3DHX0_CHLRE	A0A2K3CNX5_CHLRE	A0A2K3DKX2_CHLRE	A0A2K3E3R6_CHLRE	A0A2K3CP42_CHLRE	A0A2K3DLN8_CHLRE	A0A2K3D3Q9_CHLRE	A0A2K3CWH5_CHLRE	A0A2K3E6H5_CHLRE	A0A2K3DEK7_CHLRE	A0A2K3E3U2_CHLRE	A0A2K3CZP9_CHLRE	A0A2K3E3J8_CHLRE	A0A2K3DT58_CHLRE	A0A2K3CPT2_CHLRE	A0A2K3DEM7_CHLRE	A0A2K3CW23_CHLRE	A0A2K3DF94_CHLRE	A0A2K3DLN6_CHLRE	A0A2K3E2Q8_CHLRE	A0A2K3DFF6_CHLRE	A0A2K3CV21_CHLRE	A0A2K3CPC9_CHLRE
biological_process	GO:0045944	positive regulation of transcription by RNA polymerase II	22	33	0.666667	0.999647	0.00102658	1	0.374	A0A2K3CV22_CHLRE	A0A2K3CY22_CHLRE	A0A2K3DRN7_CHLRE	A0A2K3D3S2_CHLRE	A0A2K3CYN0_CHLRE	A0A2K3D7C3_CHLRE	A0A2K3DMH1_CHLRE	A0A2K3DYA7_CHLRE	A0A2K3CVM5_CHLRE	A0A2K3E7C0_CHLRE	A0A2K3E5Y3_CHLRE	A0A2K3DWI1_CHLRE	A0A2K3DAY1_CHLRE	A0A2K3DN23_CHLRE	A0A2K3DHZ0_CHLRE	A0A2K3E001_CHLRE	A0A2K3DK49_CHLRE	A0A2K3DZW9_CHLRE	A0A2K3D586_CHLRE	A0A2K3E0R1_CHLRE	A0A2K3DS01_CHLRE	A0A2K3DNI2_CHLRE
molecular_function	GO:0005216	ion channel activity	22	40	0.55	0.999965	6.93563e-05	1	0.002	Q8RUT8_CHLRE	A0A2K3DB39_CHLRE	A0A2K3DGB6_CHLRE	A0A2K3CR54_CHLRE	A0A2K3D4R3_CHLRE	A0A2K3D1U7_CHLRE	A0A2K3E5I3_CHLRE	A0A2K3CWZ0_CHLRE	A0A2K3D7N7_CHLRE	A0A2K3DD06_CHLRE	A0A2K3CUJ3_CHLRE	A0A2K3DKM4_CHLRE	A0A2K3E5M0_CHLRE	A0A2K3DJT8_CHLRE	A0A2K3D1V4_CHLRE	A0A2K3E5M5_CHLRE	A0A2K3CX08_CHLRE	A0A2K3E6L0_CHLRE	A0A2K3CR50_CHLRE	A0A2K3DSB6_CHLRE	A0A2K3CP03_CHLRE	A0A2K3E771_CHLRE
molecular_function	GO:0020037	heme binding	20	103	0.194175	0.00244199	0.998852	0.326	1	A0A2K3CZA3_CHLRE	A0A2K3DI95_CHLRE	A0A2K3DU66_CHLRE	A0A2K3DEN9_CHLRE	A0A2K3DWT1_CHLRE	A0A2K3E2X6_CHLRE	A0A2K3DWE9_CHLRE	A0A2K3CVX2_CHLRE	A0A2K3CTE5_CHLRE	A0A2K3DJW5_CHLRE	A0A2K3CU48_CHLRE	A0A2K3D9L1_CHLRE	A0A2K3DLQ3_CHLRE	A0A2K3CZ48_CHLRE	A0A2K3E1R9_CHLRE	A0A2K3CPL0_CHLRE	A0A2K3D826_CHLRE	A0A2K3E785_CHLRE	A0A2K3CPH4_CHLRE	A0A2K3DWT0_CHLRE
molecular_function	GO:0051082	unfolded protein binding	20	85	0.235294	0.049243	0.971258	1	1	A8J7K3_CHLRE	A8ITJ1_CHLRE	A8IHL1_CHLRE	A0A2K3E5B3_CHLRE	A0A2K3D5U1_CHLRE	A0A2K3CU73_CHLRE	A0A2K3DZS2_CHLRE	A0A2K3E797_CHLRE	A0A2K3D556_CHLRE	A0A2K3CYR7_CHLRE	A0A2K3CWA8_CHLRE	A0A2K3DKF1_CHLRE	A0A2K3CXM3_CHLRE	A0A2K3DRT8_CHLRE	A0A2K3E4D3_CHLRE	A0A2K3DFT6_CHLRE	A0A2K3DH95_CHLRE	A8I6Y0_CHLRE	A0A2K3CSA6_CHLRE	A0A2K3CTA3_CHLRE
molecular_function	GO:0008168	methyltransferase activity	20	73	0.273973	0.866259	0.165786	1	1	A0A2K3D1H3_CHLRE	A0A2K3DBG5_CHLRE	A0A2K3D1H4_CHLRE	A0A2K3DIA7_CHLRE	A0A2K3E7I3_CHLRE	A0A2K3CS39_CHLRE	A0A2K3DT13_CHLRE	A0A2K3DJ67_CHLRE	A0A2K3DRB2_CHLRE	A0A2K3DBY3_CHLRE	A0A2K3DQK0_CHLRE	A0A2K3DSX4_CHLRE	A0A2K3DZG0_CHLRE	A0A2K3D8E4_CHLRE	A0A2K3CSN9_CHLRE	A0A2K3CW79_CHLRE	A0A2K3CSQ1_CHLRE	A0A2K3CVA4_CHLRE	A0A2K3DZD7_CHLRE	A0A2K3DZF8_CHLRE
cellular_component	GO:0005871	kinesin complex	20	35	0.571429	0.999426	0.00177828	1	0.251	A0A2K3D0X3_CHLRE	A0A2K3CWR1_CHLRE	A0A2K3DWY1_CHLRE	A0A2K3DFZ5_CHLRE	A0A2K3E630_CHLRE	A0A2K3E8E6_CHLRE	A0A2K3DJH8_CHLRE	A0A2K3DWL0_CHLRE	A0A2K3D0S0_CHLRE	A0A2K3DSR2_CHLRE	A0A2K3E8E5_CHLRE	A0A2K3CNE1_CHLRE	A0A2K3DAZ6_CHLRE	A0A2K3DBK4_CHLRE	A0A2K3CRT3_CHLRE	A0A2K3E741_CHLRE	A0A2K3DZP9_CHLRE	A0A2K3DNX1_CHLRE	A0A2K3D1P0_CHLRE	A0A2K3DC11_CHLRE
biological_process	GO:0006378	mRNA polyadenylation	19	29	0.655172	0.999987	6.39804e-05	1	0.022	A0A2K3DJW4_CHLRE	A0A2K3CWY4_CHLRE	A0A2K3CY40_CHLRE	A0A2K3CWY3_CHLRE	A0A2K3CVP9_CHLRE	A0A2K3CZU5_CHLRE	A0A2K3CR70_CHLRE	A0A2K3E4P5_CHLRE	A0A2K3D0F3_CHLRE	A0A2K3DRY0_CHLRE	A0A2K3DWB2_CHLRE	A0A2K3CYR6_CHLRE	A0A2K3DEE7_CHLRE	A0A2K3DQM1_CHLRE	A0A2K3CVQ7_CHLRE	A0A2K3E241_CHLRE	A0A2K3DC04_CHLRE	A0A2K3CYN8_CHLRE	A0A2K3D5Y2_CHLRE
molecular_function	GO:0004114	3',5'-cyclic-nucleotide phosphodiesterase activity	19	38	0.5	0.992598	0.0174722	1	1	A0A2K3E3K8_CHLRE	A0A2K3E2U1_CHLRE	A0A2K3CTQ5_CHLRE	A0A2K3E402_CHLRE	A0A2K3CTS8_CHLRE	A0A2K3D7N5_CHLRE	A0A2K3E4B4_CHLRE	A0A2K3D175_CHLRE	A0A2K3CXR2_CHLRE	A0A2K3DQ61_CHLRE	A0A2K3D180_CHLRE	A0A2K3E354_CHLRE	A0A2K3CTR5_CHLRE	A0A2K3CXT4_CHLRE	A0A2K3DBF7_CHLRE	A0A2K3CZD9_CHLRE	A0A2K3D5L0_CHLRE	A0A2K3DQ75_CHLRE	A0A2K3D5P8_CHLRE
cellular_component	GO:0005794	Golgi apparatus	18	169	0.106509	1.15901e-09	1	0	1	A0A2K3D7X3_CHLRE	A0A2K3CQE6_CHLRE	A0A2K3CYI1_CHLRE	A0A2K3D1Z8_CHLRE	A0A2K3DEQ8_CHLRE	A0A2K3DE93_CHLRE	A0A2K3DLQ5_CHLRE	A0A2K3DC40_CHLRE	A0A2K3DGH7_CHLRE	A0A2K3DQ81_CHLRE	A0A2K3D110_CHLRE	A0A2K3DEU8_CHLRE	A0A2K3DJN2_CHLRE	A0A2K3DQE5_CHLRE	A0A2K3E564_CHLRE	A0A2K3DRE9_CHLRE	A0A2K3DP34_CHLRE	A0A2K3DFF0_CHLRE
molecular_function	GO:0003724	RNA helicase activity	18	61	0.295082	0.34247	0.752742	1	1	A0A2K3DAX3_CHLRE	A0A2K3CSM4_CHLRE	A0A2K3E676_CHLRE	A0A2K3DY64_CHLRE	A0A2K3DWS4_CHLRE	A0A2K3D1X2_CHLRE	A0A2K3DN03_CHLRE	A0A2K3E175_CHLRE	A0A2K3D959_CHLRE	A0A2K3DXU4_CHLRE	A0A2K3DIB3_CHLRE	A0A2K3DVM2_CHLRE	A0A2K3DX35_CHLRE	A0A2K3D6Z4_CHLRE	A0A2K3DQ74_CHLRE	A0A2K3DND5_CHLRE	A0A2K3DQE6_CHLRE	A0A2K3DY69_CHLRE
biological_process	GO:1990414	replication-born double-strand break repair via sister chromatid exchange	18	19	0.947368	1	9.6144e-09	1	0	A0A2K3DFV4_CHLRE	A0A2K3CNX5_CHLRE	A0A2K3E3R6_CHLRE	A0A2K3E6C0_CHLRE	A0A2K3DLN8_CHLRE	A0A2K3D3Q9_CHLRE	A0A2K3D5W6_CHLRE	A0A2K3CWH5_CHLRE	A0A2K3E6H5_CHLRE	A0A2K3DEK7_CHLRE	A0A2K3CZP9_CHLRE	A0A2K3DFQ1_CHLRE	A0A2K3DEM7_CHLRE	A0A2K3DF94_CHLRE	A0A2K3D7X0_CHLRE	A0A2K3DLN6_CHLRE	A0A2K3DFF6_CHLRE	A0A2K3CV21_CHLRE
molecular_function	GO:0004497	monooxygenase activity	17	52	0.326923	0.753854	0.316463	1	1	A0A2K3DI95_CHLRE	A0A2K3DU66_CHLRE	A0A2K3E0N0_CHLRE	A0A2K3DEN9_CHLRE	A0A2K3DWT1_CHLRE	A0A2K3E0Q0_CHLRE	A0A2K3DWE9_CHLRE	A0A2K3E1Z1_CHLRE	A0A2K3CTE5_CHLRE	A0A2K3E895_CHLRE	A0A2K3D9L1_CHLRE	A0A2K3DLQ3_CHLRE	A0A2K3E0Q2_CHLRE	A0A2K3D826_CHLRE	A0A2K3E785_CHLRE	A0A2K3DWT0_CHLRE	A0A2K3D329_CHLRE
molecular_function	GO:0003887	DNA-directed DNA polymerase activity	17	21	0.809524	0.999999	6.24417e-06	1	0	A0A2K3DXG3_CHLRE	A0A2K3CPZ5_CHLRE	A0A2K3CTR8_CHLRE	A0A2K3E5N7_CHLRE	A0A2K3CR35_CHLRE	A0A2K3DXP3_CHLRE	A0A2K3D660_CHLRE	A0A2K3DKD8_CHLRE	A0A2K3DZJ0_CHLRE	A0A2K3CRE2_CHLRE	A0A2K3D663_CHLRE	A0A2K3DMG2_CHLRE	A0A2K3DVI0_CHLRE	A0A2K3DGR3_CHLRE	A0A2K3DDR6_CHLRE	A0A2K3D4A8_CHLRE	A0A2K3D744_CHLRE
biological_process	GO:0060271	cilium assembly	16	52	0.307692	0.586745	0.501301	1	1	A9XPA7_CHLRE	A0A2K3D211_CHLRE	A0A2K3D8D9_CHLRE	A0A2K3DBC2_CHLRE	A0A2K3CZX8_CHLRE	A0A2K3CP68_CHLRE	A0A2K3DBT1_CHLRE	A0A2K3DNN4_CHLRE	A0A2K3CW05_CHLRE	A0A2K3D7G4_CHLRE	A0A2K3DHL8_CHLRE	A0A2K3E823_CHLRE	A0A2K3DH40_CHLRE	A0A2K3CQT7_CHLRE	A0A2K3E6G2_CHLRE	A0A2K3CMR7_CHLRE
biological_process	GO:0043161	proteasome-mediated ubiquitin-dependent protein catabolic process	16	66	0.242424	0.986181	0.0207733	1	1	A8JCX3_CHLRE	A0A141CN33_CHLRE	A0A2K3DJV5_CHLRE	A0A2K3DTW2_CHLRE	A0A2K3DX97_CHLRE	A0A2K3E736_CHLRE	A0A2K3D502_CHLRE	A0A2K3E5J0_CHLRE	A0A2K3E665_CHLRE	A0A2K3DV87_CHLRE	A0A2K3DU96_CHLRE	A0A2K3E253_CHLRE	A0A2K3DVP2_CHLRE	A0A2K3CVD3_CHLRE	A0A2K3CTT0_CHLRE	A0A2K3DQH3_CHLRE
molecular_function	GO:0000993	RNA polymerase II complex binding	16	24	0.666667	0.999458	0.0020409	1	0.411	A0A2K3DJW4_CHLRE	A0A2K3D6M6_CHLRE	A0A2K3CWY3_CHLRE	A0A2K3CS28_CHLRE	A0A2K3CR70_CHLRE	A0A2K3E4P5_CHLRE	A0A2K3D0F3_CHLRE	A0A2K3D8T0_CHLRE	A0A2K3DRY0_CHLRE	A0A2K3DWB2_CHLRE	A0A2K3CYR6_CHLRE	A0A2K3DEE7_CHLRE	A0A2K3DQM1_CHLRE	A0A2K3D6N8_CHLRE	A0A2K3CYN8_CHLRE	A0A2K3D5Y2_CHLRE
molecular_function	GO:0003684	damaged DNA binding	16	27	0.592593	0.998369	0.00502034	1	0.755	A0A2K3DUT4_CHLRE	A0A2K3DHR9_CHLRE	A0A2K3CQ68_CHLRE	A0A2K3E868_CHLRE	A0A2K3D1K3_CHLRE	A0A2K3DRP5_CHLRE	A0A2K3D660_CHLRE	A0A2K3DKD8_CHLRE	A0A2K3D5Q5_CHLRE	A0A2K3D4E3_CHLRE	A0A2K3D663_CHLRE	A0A2K3DVI0_CHLRE	A0A2K3E8G5_CHLRE	A0A2K3DCV7_CHLRE	A0A2K3D3M2_CHLRE	A0A2K3D4A8_CHLRE
molecular_function	GO:0140359	ABC-type transporter activity	16	48	0.333333	0.692139	0.408855	1	1	A0A2K3CZ64_CHLRE	A0A2K3DAD7_CHLRE	A0A2K3DUU4_CHLRE	A0A2K3E2F8_CHLRE	A0A2K3DKG7_CHLRE	A0A2K3CQM8_CHLRE	A0A2K3DKG8_CHLRE	A0A2K3CQJ6_CHLRE	A0A2K3CQ08_CHLRE	A0A2K3DVQ1_CHLRE	A0A2K3E0C3_CHLRE	A0A2K3D1B2_CHLRE	A0A2K3CVH8_CHLRE	A0A2K3DRQ7_CHLRE	A0A2K3CXU8_CHLRE	A0A2K3DUH3_CHLRE
biological_process	GO:0055085	transmembrane transport	16	50	0.32	0.123583	0.901525	1	1	A0A2K3CZ64_CHLRE	A0A2K3DUU4_CHLRE	A0A2K3E2F8_CHLRE	A0A2K3CQM8_CHLRE	A0A2K3DAP5_CHLRE	A0A2K3CQJ6_CHLRE	A0A2K3CW12_CHLRE	A0A2K3CYB1_CHLRE	A0A2K3CNW1_CHLRE	A0A2K3DH39_CHLRE	A0A2K3E737_CHLRE	A0A2K3D1B2_CHLRE	A0A2K3DCK0_CHLRE	A0A2K3D7D7_CHLRE	A0A2K3CZ68_CHLRE	A0A2K3CXU8_CHLRE
molecular_function	GO:0000976	transcription cis-regulatory region binding	16	23	0.695652	1	5.58948e-19	1	0	A0A2K3CV22_CHLRE	A0A2K3DZA8_CHLRE	A0A2K3DH12_CHLRE	A0A2K3E689_CHLRE	A0A2K3D3A1_CHLRE	A0A2K3DLP6_CHLRE	A0A2K3DAV8_CHLRE	A0A2K3DFM4_CHLRE	A0A2K3D0J1_CHLRE	A0A2K3DWL8_CHLRE	A0A2K3DE24_CHLRE	A0A2K3DP27_CHLRE	A0A2K3E0R1_CHLRE	A0A2K3DF47_CHLRE	A0A2K3DK56_CHLRE	A0A2K3DN21_CHLRE
cellular_component	GO:0043231	intracellular membrane-bounded organelle	15	69	0.217391	0.992342	0.00872868	1	0.711	A0A2K3DJL1_CHLRE	A0A2K3D7N4_CHLRE	A0A2K3E1E7_CHLRE	A0A2K3DIT9_CHLRE	A0A2K3D2J2_CHLRE	A0A2K3DVQ1_CHLRE	A0A2K3DTK4_CHLRE	A0A2K3CZV1_CHLRE	A0A2K3E0C3_CHLRE	A0A2K3E729_CHLRE	A0A2K3CQX9_CHLRE	A0A2K3E3U6_CHLRE	A0A2K3CVH8_CHLRE	A0A2K3CT49_CHLRE	A0A2K3DX52_CHLRE
molecular_function	GO:0022857	transmembrane transporter activity	15	76	0.197368	0.00202706	0.998497	0.283	1	A8J425_CHLRE	A0A2K3E6E4_CHLRE	A0A2K3DAP5_CHLRE	A0A2K3CPC7_CHLRE	A0A2K3DDK9_CHLRE	A0A2K3E569_CHLRE	A0A2K3CSQ2_CHLRE	A0A2K3E1H1_CHLRE	A0A2K3DGZ4_CHLRE	A0A2K3CQ07_CHLRE	A0A2K3CYB0_CHLRE	A0A2K3D152_CHLRE	A0A2K3E827_CHLRE	A0A2K3DZ02_CHLRE	A0A2K3D2J0_CHLRE
cellular_component	GO:1990904	ribonucleoprotein complex	15	39	0.384615	4.22794e-10	1	0	1	A8JCK3_CHLRE	A8IBU6_CHLRE	A0A2K3E140_CHLRE	A0A2K3E781_CHLRE	A0A2K3DQ82_CHLRE	A0A2K3CQK5_CHLRE	A0A2K3DC97_CHLRE	A0A2K3DWP4_CHLRE	A0A2K3DK89_CHLRE	A0A2K3D6Z4_CHLRE	A0A2K3DE16_CHLRE	A0A2K3CYH8_CHLRE	A0A2K3D1G0_CHLRE	A0A2K3D1S7_CHLRE	A0A2K3DQE6_CHLRE
molecular_function	GO:0003697	single-stranded DNA binding	15	43	0.348837	0.701589	0.413958	1	1	A0A0U2Q5E3_CHLRE	A0A2K3D3N5_CHLRE	A0A2K3DUT4_CHLRE	A0A2K3D357_CHLRE	A0A2K3DRP5_CHLRE	A0A2K3DIP5_CHLRE	A0A2K3DXZ9_CHLRE	A0A2K3D4S1_CHLRE	A0A2K3D5Q5_CHLRE	A0A2K3D4E3_CHLRE	A0A2K3DMV0_CHLRE	A0A2K3E874_CHLRE	A0A2K3DLB4_CHLRE	A0A2K3DPT0_CHLRE	A0A2K3DFI8_CHLRE
molecular_function	GO:0042393	histone binding	15	37	0.405405	0.90112	0.166238	1	1	A0A2K3D9Y5_CHLRE	A0A2K3DF59_CHLRE	A0A2K3DT74_CHLRE	A0A2K3CXU2_CHLRE	A0A2K3D3S2_CHLRE	A0A2K3DMH1_CHLRE	A0A2K3D065_CHLRE	A0A2K3E7C0_CHLRE	A0A2K3DL90_CHLRE	A0A2K3E5Y3_CHLRE	A0A2K3DHZ0_CHLRE	A0A2K3E1Q3_CHLRE	A0A2K3D586_CHLRE	A0A2K3E881_CHLRE	A0A2K3DNI2_CHLRE
cellular_component	GO:0000124	SAGA complex	15	18	0.833333	0.999999	6.30971e-06	1	0.001	A8JFR8_CHLRE	A0A2K3DSK0_CHLRE	A0A2K3CVE2_CHLRE	A0A2K3D4R7_CHLRE	A0A2K3CNV1_CHLRE	A0A2K3D666_CHLRE	A0A2K3E5F1_CHLRE	A0A2K3CWE8_CHLRE	A0A2K3DY56_CHLRE	A0A2K3D0I1_CHLRE	A0A2K3DDF7_CHLRE	A0A2K3CUC8_CHLRE	A0A2K3DU65_CHLRE	A0A2K3D274_CHLRE	A0A2K3E138_CHLRE
molecular_function	GO:0050660	flavin adenine dinucleotide binding	14	56	0.25	0.0609914	0.962462	1	1	A0A2K3DQK3_CHLRE	A0A2K3DUZ8_CHLRE	A0A2K3D634_CHLRE	A0A2K3DQR7_CHLRE	A0A2K3CT13_CHLRE	A0A2K3DPX7_CHLRE	A0A2K3E1U9_CHLRE	A0A2K3DQS5_CHLRE	A0A2K3DQS9_CHLRE	A0A2K3DVK5_CHLRE	A0A2K3CZD5_CHLRE	A0A2K3CRY4_CHLRE	A0A2K3D1A2_CHLRE	A0A2K3DVX0_CHLRE
molecular_function	GO:0008080	N-acetyltransferase activity	14	44	0.318182	0.846883	0.223158	1	1	A0A2K3DFE2_CHLRE	A0A2K3DSV0_CHLRE	A0A2K3D3S2_CHLRE	A0A2K3E0V0_CHLRE	A0A2K3DSV1_CHLRE	A0A2K3D0T0_CHLRE	A0A2K3CS28_CHLRE	A0A2K3DC40_CHLRE	A0A2K3CTM1_CHLRE	A0A2K3DSV2_CHLRE	A0A2K3DSX6_CHLRE	A0A2K3DQM1_CHLRE	A0A2K3D586_CHLRE	A0A2K3DJW2_CHLRE
biological_process	GO:0006364	rRNA processing	14	56	0.25	0.935999	0.0833329	1	1	A8I029_CHLRE	A0A2K3DYE1_CHLRE	A0A2K3E4R4_CHLRE	A0A2K3DF58_CHLRE	A0A2K3DK03_CHLRE	A0A2K3DL40_CHLRE	A0A2K3DXZ3_CHLRE	A0A2K3D8I9_CHLRE	A0A2K3D8K1_CHLRE	A0A2K3CNG0_CHLRE	A0A2K3DUC2_CHLRE	A0A2K3DCW4_CHLRE	A0A2K3DCA0_CHLRE	A0A2K3DWG3_CHLRE
molecular_function	GO:0004222	metalloendopeptidase activity	14	45	0.311111	0.501865	0.624131	1	1	A8J6C7_CHLRE	A0A2K3CNP6_CHLRE	A0A2K3DF58_CHLRE	A0A2K3E0H1_CHLRE	A0A2K3E258_CHLRE	A0A2K3DMV0_CHLRE	A0A2K3DGB9_CHLRE	A0A2K3CYD2_CHLRE	A0A2K3DZZ0_CHLRE	A0A2K3E6H2_CHLRE	A0A2K3D210_CHLRE	A0A2K3CQX0_CHLRE	A0A2K3D637_CHLRE	A8JD49_CHLRE
biological_process	GO:0006325	chromatin organization	14	34	0.411765	0.964696	0.0498864	1	1	A0A2K3DYU9_CHLRE	A0A2K3D1W7_CHLRE	A0A2K3DWL5_CHLRE	A0A2K3DY38_CHLRE	A0A2K3D7S0_CHLRE	A0A2K3DFK4_CHLRE	A0A2K3DYA7_CHLRE	A0A2K3DWG5_CHLRE	A0A2K3DIW4_CHLRE	A0A2K3DQ21_CHLRE	A0A2K3DG98_CHLRE	A0A2K3D3N7_CHLRE	A8I2K8_CHLRE	A0A2K3D892_CHLRE
biological_process	GO:0006888	endoplasmic reticulum to Golgi vesicle-mediated transport	14	47	0.297872	0.697381	0.407697	1	1	A8IPU0_CHLRE	A0A2K3D1Z8_CHLRE	A0A2K3D9Y7_CHLRE	A0A2K3DI38_CHLRE	A0A2K3D8J7_CHLRE	A0A2K3DJJ0_CHLRE	A0A2K3D7D0_CHLRE	A0A2K3DQ81_CHLRE	A0A2K3D1M4_CHLRE	A0A2K3CQU9_CHLRE	A0A2K3E7U8_CHLRE	A0A2K3DRE9_CHLRE	A0A2K3DP34_CHLRE	A8JBG7_CHLRE
molecular_function	GO:0000166	nucleotide binding	14	38	0.368421	0.996587	0.00403243	1	0.711	A0A2K3DVD9_CHLRE	A0A2K3DVC3_CHLRE	A0A2K3CPN9_CHLRE	A0A2K3D4L9_CHLRE	A0A2K3DIQ5_CHLRE	A0A2K3DIR3_CHLRE	A0A2K3DXP3_CHLRE	A0A2K3DIR1_CHLRE	A0A2K3DZJ0_CHLRE	A0A2K3E4U2_CHLRE	A0A2K3D463_CHLRE	A0A2K3DXP5_CHLRE	A0A2K3DDR6_CHLRE	A0A2K3D2H5_CHLRE
biological_process	GO:0006406	mRNA export from nucleus	14	24	0.583333	0.980363	0.044435	1	1	A0A2K3CPA3_CHLRE	A0A2K3CYY4_CHLRE	A0A2K3DQA7_CHLRE	A0A2K3DBZ4_CHLRE	A0A2K3E3Y1_CHLRE	A0A2K3DI91_CHLRE	A0A2K3D2S9_CHLRE	A0A2K3E683_CHLRE	A0A2K3DGK4_CHLRE	A0A2K3DMU9_CHLRE	A0A2K3CST7_CHLRE	A0A2K3D0N2_CHLRE	A0A2K3CSB0_CHLRE	A0A2K3D4Y9_CHLRE
molecular_function	GO:0015631	tubulin binding	14	22	0.636364	0.999522	0.000887322	1	0.202	A0A2K3DBC2_CHLRE	A0A2K3CZX8_CHLRE	A0A2K3D881_CHLRE	A0A2K3DZE2_CHLRE	A0A2K3E812_CHLRE	A0A2K3DNN4_CHLRE	A0A2K3CW05_CHLRE	A0A2K3DQX8_CHLRE	A0A2K3E823_CHLRE	A0A2K3DV48_CHLRE	A0A2K3E3I9_CHLRE	A0A2K3E3N5_CHLRE	A0A2K3DF51_CHLRE	A0A2K3E6G2_CHLRE
cellular_component	GO:0090694	Scc2-Scc4 cohesin loading complex	14	15	0.933333	1	7.44374e-07	1	0	A0A2K3CNX5_CHLRE	A0A2K3E3R6_CHLRE	A0A2K3E6C0_CHLRE	A0A2K3DLN8_CHLRE	A0A2K3D3Q9_CHLRE	A0A2K3CWH5_CHLRE	A0A2K3E6H5_CHLRE	A0A2K3DEK7_CHLRE	A0A2K3CZP9_CHLRE	A0A2K3DEM7_CHLRE	A0A2K3DF94_CHLRE	A0A2K3DLN6_CHLRE	A0A2K3DFF6_CHLRE	A0A2K3CV21_CHLRE
biological_process	GO:0034087	establishment of mitotic sister chromatid cohesion	14	15	0.933333	1	2.73891e-07	1	0	A0A2K3CNX5_CHLRE	A0A2K3E3R6_CHLRE	A0A2K3E6C0_CHLRE	A0A2K3DLN8_CHLRE	A0A2K3D3Q9_CHLRE	A0A2K3CWH5_CHLRE	A0A2K3E6H5_CHLRE	A0A2K3DEK7_CHLRE	A0A2K3CZP9_CHLRE	A0A2K3DEM7_CHLRE	A0A2K3DF94_CHLRE	A0A2K3DLN6_CHLRE	A0A2K3DFF6_CHLRE	A0A2K3CV21_CHLRE
biological_process	GO:0071169	establishment of protein localization to chromatin	14	15	0.933333	1	8.30182e-07	1	0	A0A2K3CNX5_CHLRE	A0A2K3E3R6_CHLRE	A0A2K3E6C0_CHLRE	A0A2K3DLN8_CHLRE	A0A2K3D3Q9_CHLRE	A0A2K3CWH5_CHLRE	A0A2K3E6H5_CHLRE	A0A2K3DEK7_CHLRE	A0A2K3CZP9_CHLRE	A0A2K3DEM7_CHLRE	A0A2K3DF94_CHLRE	A0A2K3DLN6_CHLRE	A0A2K3DFF6_CHLRE	A0A2K3CV21_CHLRE
biological_process	GO:0061780	mitotic cohesin loading	14	15	0.933333	1	8.30182e-07	1	0	A0A2K3CNX5_CHLRE	A0A2K3E3R6_CHLRE	A0A2K3DLN8_CHLRE	A0A2K3D3Q9_CHLRE	A0A2K3CWH5_CHLRE	A0A2K3E6H5_CHLRE	A0A2K3DEK7_CHLRE	A0A2K3CZP9_CHLRE	A0A2K3DEM7_CHLRE	A0A2K3DF94_CHLRE	A0A2K3D7N0_CHLRE	A0A2K3DLN6_CHLRE	A0A2K3DFF6_CHLRE	A0A2K3CV21_CHLRE
molecular_function	GO:0016791	phosphatase activity	13	35	0.371429	0.238987	0.809203	1	1	A0A2K3E151_CHLRE	A0A2K3E4V9_CHLRE	A0A2K3DT23_CHLRE	A0A2K3DUW6_CHLRE	A0A2K3D883_CHLRE	A0A2K3CSG4_CHLRE	A0A2K3E5C0_CHLRE	A0A2K3CSN0_CHLRE	A0A2K3E5D3_CHLRE	A0A2K3DZC7_CHLRE	A0A2K3E575_CHLRE	A0A2K3DVZ1_CHLRE	A0A2K3CX51_CHLRE
molecular_function	GO:0016740	transferase activity	13	44	0.295455	1	3.37172e-11	1	0	A0A2K3DYU9_CHLRE	A0A2K3D0H4_CHLRE	A0A2K3DLA8_CHLRE	A0A2K3D412_CHLRE	A0A2K3D7N2_CHLRE	A0A2K3CWU2_CHLRE	A0A2K3E2M8_CHLRE	A0A2K3E381_CHLRE	A0A2K3DQ27_CHLRE	A0A2K3DU47_CHLRE	A0A2K3E2W2_CHLRE	A0A2K3D3N7_CHLRE	A0A2K3DSP8_CHLRE
biological_process	GO:0051085	chaperone cofactor-dependent protein refolding	13	34	0.382353	0.859924	0.235138	1	1	A8J7K3_CHLRE	A8ITJ1_CHLRE	A8IHL1_CHLRE	A0A2K3E5B3_CHLRE	A0A2K3D5U1_CHLRE	A0A2K3CU73_CHLRE	A0A2K3DPP3_CHLRE	A0A2K3DZS2_CHLRE	A0A2K3D556_CHLRE	A0A2K3CWA8_CHLRE	A0A2K3E4D3_CHLRE	A0A2K3DFT6_CHLRE	A0A2K3CSA6_CHLRE
cellular_component	GO:0005929	cilium	13	38	0.342105	3.9426e-06	0.999998	0.001	1	A9XPA7_CHLRE	A0A2K3D8D9_CHLRE	A0A2K3DAQ4_CHLRE	A0A2K3D881_CHLRE	A0A2K3E812_CHLRE	A0A2K3E6H6_CHLRE	A0A2K3DQX8_CHLRE	A0A2K3DEG5_CHLRE	A0A2K3DV48_CHLRE	A0A2K3E3I9_CHLRE	A0A2K3E3N5_CHLRE	A0A2K3DF51_CHLRE	A0A2K3CMR7_CHLRE
biological_process	GO:0015031	protein transport	13	65	0.2	0.000587908	0.999627	0.133	1	A8IPU0_CHLRE	A0A2K3CWM1_CHLRE	A0A2K3DGZ2_CHLRE	A0A2K3CYI1_CHLRE	A0A2K3DX48_CHLRE	A0A2K3CWM0_CHLRE	A0A2K3E109_CHLRE	A0A2K3DVA8_CHLRE	A0A2K3CU41_CHLRE	A0A2K3CY81_CHLRE	A0A2K3E5D5_CHLRE	A0A2K3DLC5_CHLRE	A0A2K3E0Z7_CHLRE
biological_process	GO:0032259	methylation	13	52	0.25	0.597795	0.466158	1	1	A8J441_CHLRE	A0A2K3DGX3_CHLRE	A0A2K3DBG5_CHLRE	A0A2K3DIA7_CHLRE	A0A2K3CS39_CHLRE	A0A2K3DJ67_CHLRE	A0A2K3DBY3_CHLRE	A0A2K3DSX4_CHLRE	A0A2K3DZG0_CHLRE	A0A2K3DBI0_CHLRE	A0A2K3CVA4_CHLRE	A0A2K3DZD7_CHLRE	A0A2K3D9D3_CHLRE
cellular_component	GO:0000151	ubiquitin ligase complex	13	29	0.448276	0.999986	3.05252e-05	1	0.004	A0A2K3DU53_CHLRE	A0A2K3DDX6_CHLRE	A0A2K3DAB9_CHLRE	A0A2K3DT04_CHLRE	A0A2K3E150_CHLRE	A0A2K3DT65_CHLRE	A0A2K3DU51_CHLRE	A0A2K3E4D2_CHLRE	A0A2K3E5Y4_CHLRE	A0A2K3DU00_CHLRE	A0A2K3DTW0_CHLRE	A0A2K3D2B4_CHLRE	A0A2K3DAC1_CHLRE
molecular_function	GO:0042626	ATPase-coupled transmembrane transporter activity	13	34	0.382353	0.279866	0.787855	1	1	A0A2K3CZ64_CHLRE	A0A2K3DAD7_CHLRE	A0A2K3DUU4_CHLRE	A0A2K3E2F8_CHLRE	A0A2K3CQM8_CHLRE	A0A2K3CQJ6_CHLRE	A0A2K3DVQ1_CHLRE	A0A2K3DH39_CHLRE	A0A2K3E0C3_CHLRE	A0A2K3CUM2_CHLRE	A0A2K3D1B2_CHLRE	A0A2K3CVH8_CHLRE	A0A2K3CXU8_CHLRE
biological_process	GO:0051301	cell division	13	41	0.317073	0.638559	0.465119	1	1	A0A2K3D9Y5_CHLRE	A0A2K3D0Z9_CHLRE	A0A2K3DI01_CHLRE	A0A2K3DBV0_CHLRE	A0A2K3DFW5_CHLRE	A0A2K3CTF3_CHLRE	A0A2K3CVZ5_CHLRE	A0A2K3CRQ2_CHLRE	A0A2K3DAV8_CHLRE	A0A2K3CZ15_CHLRE	A0A2K3DU98_CHLRE	A0A2K3D5S1_CHLRE	A8JGS6_CHLRE
cellular_component	GO:0016514	SWI/SNF complex	13	13	1	1	2.26274e-07	1	0	A8HZJ8_CHLRE	A0A2K3CR78_CHLRE	A0A2K3E714_CHLRE	A0A2K3CYB5_CHLRE	A0A2K3DTI9_CHLRE	A0A2K3CN53_CHLRE	A0A2K3CRK4_CHLRE	A0A2K3DFS6_CHLRE	A0A2K3E1P8_CHLRE	A0A2K3DZ06_CHLRE	A0A2K3D0D1_CHLRE	A0A2K3DHH6_CHLRE	A0A2K3E828_CHLRE
molecular_function	GO:0008094	ATP-dependent activity, acting on DNA	13	23	0.565217	0.998613	0.00232355	1	0.469	A0A2K3DDK3_CHLRE	A0A2K3DLY5_CHLRE	A0A2K3DIU2_CHLRE	A0A2K3CPS8_CHLRE	A0A2K3DXZ9_CHLRE	A0A2K3DJH5_CHLRE	A0A2K3DWI1_CHLRE	A0A2K3DP13_CHLRE	A0A2K3DND2_CHLRE	A0A2K3E133_CHLRE	A0A2K3CSQ1_CHLRE	A0A2K3CSI1_CHLRE	A0A2K3E7C9_CHLRE
cellular_component	GO:0005849	mRNA cleavage factor complex	13	16	0.8125	0.999998	1.15706e-05	1	0.001	A0A2K3DJW4_CHLRE	A0A2K3CWY3_CHLRE	A0A2K3CR70_CHLRE	A0A2K3E4P5_CHLRE	A0A2K3D0F3_CHLRE	A0A2K3DRY0_CHLRE	A0A2K3DWB2_CHLRE	A0A2K3CYR6_CHLRE	A0A2K3DEE7_CHLRE	A0A2K3DQM1_CHLRE	A0A2K3DC04_CHLRE	A0A2K3CYN8_CHLRE	A0A2K3D5Y2_CHLRE
biological_process	GO:0006396	RNA processing	13	31	0.419355	0.999676	0.000447632	1	0.16	A0A2K3DKX2_CHLRE	A0A2K3D8T1_CHLRE	A0A2K3DRZ0_CHLRE	A0A2K3CYB5_CHLRE	A0A2K3CP42_CHLRE	A0A2K3D6G9_CHLRE	A0A2K3DWW3_CHLRE	A0A2K3CPT2_CHLRE	A0A2K3DRV7_CHLRE	A0A2K3CW23_CHLRE	A0A2K3D6H8_CHLRE	A0A2K3DT38_CHLRE	A0A2K3E2Q8_CHLRE
molecular_function	GO:0009881	photoreceptor activity	13	36	0.361111	0.745768	0.372674	1	1	A0A2K3E0G1_CHLRE	A0A2K3CZT1_CHLRE	A0A2K3DHC0_CHLRE	A0A2K3D9S2_CHLRE	A0A2K3DD45_CHLRE	A0A2K3DRZ0_CHLRE	A0A2K3DRY5_CHLRE	A0A2K3CNT5_CHLRE	A0A2K3DD35_CHLRE	A0A2K3D9L6_CHLRE	A0A2K3DRV7_CHLRE	A0A2K3D0R9_CHLRE	A0A2K3DBM8_CHLRE
biological_process	GO:0046999	regulation of conjugation	13	28	0.464286	0.971675	0.0641068	1	1	A0A2K3DHC0_CHLRE	A0A2K3D9S2_CHLRE	A0A2K3DD45_CHLRE	A0A2K3DRZ0_CHLRE	A0A2K3E4W9_CHLRE	A0A2K3DRY5_CHLRE	A0A2K3E4X8_CHLRE	A0A2K3CNT5_CHLRE	A0A2K3E4X2_CHLRE	A0A2K3DD35_CHLRE	A0A2K3D9L6_CHLRE	A0A2K3D0R9_CHLRE	A0A2K3DBM8_CHLRE
biological_process	GO:0070588	calcium ion transmembrane transport	13	27	0.481481	0.998684	0.00334395	1	0.789	A0A2K3D134_CHLRE	A0A2K3E1S8_CHLRE	A0A2K3DV26_CHLRE	A0A2K3DVV6_CHLRE	A0A2K3DBC1_CHLRE	A0A2K3DAJ9_CHLRE	A0A2K3DI77_CHLRE	A0A2K3DEN8_CHLRE	A0A2K3D953_CHLRE	A0A2K3CUP6_CHLRE	A0A2K3D286_CHLRE	A0A2K3E3A3_CHLRE	A0A2K3E1R4_CHLRE
biological_process	GO:0045893	positive regulation of transcription, DNA-templated	13	16	0.8125	0.999998	6.20791e-06	1	0.002	A0A2K3CR78_CHLRE	A0A2K3E714_CHLRE	A0A2K3CYB5_CHLRE	A0A2K3DI91_CHLRE	A0A2K3DTI9_CHLRE	A0A2K3CN53_CHLRE	A0A2K3CW52_CHLRE	A0A2K3CP13_CHLRE	A0A2K3D0D1_CHLRE	A0A2K3DAX6_CHLRE	A0A2K3DHH6_CHLRE	A0A2K3D8C9_CHLRE	A0A2K3E828_CHLRE
molecular_function	GO:2001070	starch binding	13	32	0.40625	0.88271	0.204954	1	1	A0A2K3CP22_CHLRE	A0A2K3DEG4_CHLRE	A0A2K3D652_CHLRE	A0A2K3D7T6_CHLRE	A0A2K3E1A9_CHLRE	A0A2K3D1W5_CHLRE	A0A2K3DEH1_CHLRE	A0A2K3D0U6_CHLRE	A0A2K3E1A6_CHLRE	A0A2K3DFE3_CHLRE	A0A2K3E1A7_CHLRE	A8J0B1_CHLRE	A0A2K3DEF8_CHLRE
biological_process	GO:0006874	cellular calcium ion homeostasis	13	23	0.565217	0.99665	0.00757372	1	0.952	A0A2K3D134_CHLRE	A0A2K3E1S8_CHLRE	A0A2K3DV26_CHLRE	A0A2K3DBC1_CHLRE	A0A2K3DAJ9_CHLRE	A0A2K3DI77_CHLRE	A0A2K3DUD6_CHLRE	A0A2K3CUP6_CHLRE	A0A2K3D286_CHLRE	A0A2K3E3A3_CHLRE	A0A2K3E1R4_CHLRE	A0A2K3DPP0_CHLRE	A0A2K3DPN4_CHLRE
cellular_component	GO:0031514	motile cilium	12	136	0.0882353	4.87379e-10	1	0	1	A0A2K3D1I5_CHLRE	A8IU61_CHLRE	A8IFZ1_CHLRE	A8IJZ3_CHLRE	A9XPA7_CHLRE	Q9SWH3_CHLRE	A0A2K3D8D3_CHLRE	A0A2K3CYE9_CHLRE	A0A2K3DN16_CHLRE	A0A2K3DQQ4_CHLRE	Q8S3U7_CHLRE	A8HYW3_CHLRE
molecular_function	GO:0016705	oxidoreductase activity, acting on paired donors, with incorporation or reduction of molecular oxygen	12	48	0.25	0.139183	0.898926	1	1	A0A2K3DI95_CHLRE	A0A2K3DU66_CHLRE	A0A2K3DEN9_CHLRE	A0A2K3DWT1_CHLRE	A0A2K3DWE9_CHLRE	A0A2K3CVX2_CHLRE	A0A2K3CTE5_CHLRE	A0A2K3D9L1_CHLRE	A0A2K3DLQ3_CHLRE	A0A2K3D826_CHLRE	A0A2K3E785_CHLRE	A0A2K3DWT0_CHLRE
molecular_function	GO:0003743	translation initiation factor activity	12	46	0.26087	0.229776	0.857204	1	1	D5LAW4_CHLRE	A8IXR5_CHLRE	A0A2K3CNL9_CHLRE	A0A2K3DM22_CHLRE	A0A2K3CVD8_CHLRE	A0A2K3CTN2_CHLRE	A0A2K3DER8_CHLRE	A0A2K3CVE3_CHLRE	A0A2K3DHR8_CHLRE	A0A2K3D4R1_CHLRE	A0A2K3DJX4_CHLRE	A0A2K3DHP9_CHLRE
molecular_function	GO:0005096	GTPase activator activity	12	32	0.375	0.701589	0.413958	1	1	A8J1B8_CHLRE	A0A2K3DR72_CHLRE	A0A2K3DBX3_CHLRE	A0A2K3DRL3_CHLRE	A0A2K3DR86_CHLRE	A0A2K3CPX9_CHLRE	A0A2K3DRA2_CHLRE	A0A2K3DVW4_CHLRE	A0A2K3D4Y4_CHLRE	A0A2K3E0C8_CHLRE	A0A2K3DAX9_CHLRE	A0A2K3DUS6_CHLRE
molecular_function	GO:0004693	cyclin-dependent protein serine/threonine kinase activity	12	23	0.521739	0.985894	0.0379906	1	1	A0A2K3E304_CHLRE	A0A2K3DWM0_CHLRE	A0A2K3DLE3_CHLRE	A0A2K3DR74_CHLRE	A0A2K3CWN0_CHLRE	A0A2K3E862_CHLRE	A0A2K3E5P4_CHLRE	A0A2K3DTW3_CHLRE	A0A2K3E864_CHLRE	A0A2K3DRT5_CHLRE	A0A0M4M5H7_CHLRE	A0A2K3D5H9_CHLRE
biological_process	GO:0000398	mRNA splicing, via spliceosome	12	84	0.142857	0.00614849	0.996648	0.813	1	A0A2K3DRY1_CHLRE	A0A2K3DLB1_CHLRE	A0A2K3DYQ0_CHLRE	A0A2K3CRT7_CHLRE	A0A2K3E660_CHLRE	A0A2K3DQQ7_CHLRE	A0A2K3DML4_CHLRE	A0A2K3CUP8_CHLRE	A0A2K3DR41_CHLRE	A0A2K3DXX3_CHLRE	A0A2K3CUS5_CHLRE	A0A2K3D5Y8_CHLRE
biological_process	GO:0006369	termination of RNA polymerase II transcription	12	16	0.75	0.999949	0.00038503	1	0.139	A0A2K3DJW4_CHLRE	A0A2K3CWY3_CHLRE	A0A2K3CR70_CHLRE	A0A2K3E4P5_CHLRE	A0A2K3D0F3_CHLRE	A0A2K3DRY0_CHLRE	A0A2K3DWB2_CHLRE	A0A2K3CYR6_CHLRE	A0A2K3DEE7_CHLRE	A0A2K3DQM1_CHLRE	A0A2K3CYN8_CHLRE	A0A2K3D5Y2_CHLRE
molecular_function	GO:0031490	chromatin DNA binding	12	15	0.8	0.999398	0.00290056	1	0.566	A0A2K3CUE4_CHLRE	A0A2K3DKK9_CHLRE	A0A2K3CT32_CHLRE	A0A2K3CU44_CHLRE	A0A2K3D065_CHLRE	A0A2K3DYA7_CHLRE	A0A2K3DL90_CHLRE	A0A2K3E001_CHLRE	A0A2K3CT82_CHLRE	A0A2K3DZW9_CHLRE	A0A2K3DAW9_CHLRE	A0A2K3E881_CHLRE
molecular_function	GO:0000175	3'-5'-exoribonuclease activity	12	23	0.521739	0.978187	0.0541684	1	1	A0A2K3DVD9_CHLRE	A0A2K3DVC3_CHLRE	A0A2K3D949_CHLRE	A0A2K3CZ74_CHLRE	A0A2K3E705_CHLRE	A0A2K3D7N1_CHLRE	A0A2K3D2W5_CHLRE	A0A2K3DB72_CHLRE	A0A2K3E5X8_CHLRE	A0A2K3DYW2_CHLRE	A0A2K3E7G4_CHLRE	A0A2K3D2H5_CHLRE
cellular_component	GO:0005814	centriole	11	20	0.55	0.993423	0.0211963	1	0.952	POC16_CHLRE	POB15_CHLRE	A0A2K3DEH2_CHLRE	A0A2K3DBC2_CHLRE	A0A2K3CZX8_CHLRE	A0A2K3DNN4_CHLRE	A0A2K3CW05_CHLRE	A0A2K3D7G4_CHLRE	A0A2K3E823_CHLRE	A0A2K3DH40_CHLRE	A0A2K3E6G2_CHLRE
cellular_component	GO:0005930	axoneme	11	46	0.23913	0.289664	0.800196	1	1	A0A2K3CYR5_CHLRE	A0A2K3DM40_CHLRE	A0A2K3DDL5_CHLRE	A0A2K3CUD8_CHLRE	A0A2K3D202_CHLRE	A0A2K3E4N3_CHLRE	A0A2K3CXB1_CHLRE	A0A2K3DHL8_CHLRE	A0A2K3CU18_CHLRE	A0A2K3E6A9_CHLRE	A0A2K3DQ91_CHLRE
molecular_function	GO:0046983	protein dimerization activity	11	26	0.423077	0.0316092	0.982248	1	1	Q65Z16_CHLRE	A0A2K3D7B6_CHLRE	A0A2K3DSI0_CHLRE	A0A2K3DL80_CHLRE	A0A2K3E855_CHLRE	A0A2K3DUI4_CHLRE	A0A2K3E5H0_CHLRE	A0A2K3DLI9_CHLRE	A0A2K3DJZ2_CHLRE	A0A2K3E2W3_CHLRE	A0A2K3DL56_CHLRE
biological_process	GO:0000209	protein polyubiquitination	11	41	0.268293	0.366913	0.746214	1	1	A0A2K3DI79_CHLRE	A0A2K3DT04_CHLRE	A0A2K3D502_CHLRE	A0A2K3E5J0_CHLRE	A0A2K3E665_CHLRE	A0A2K3DW99_CHLRE	A0A2K3DT65_CHLRE	A0A2K3D9Q5_CHLRE	A0A2K3DHD3_CHLRE	A0A2K3E5Y4_CHLRE	A0A2K3DQQ1_CHLRE
molecular_function	GO:0071949	FAD binding	11	48	0.229167	0.104809	0.943472	1	1	A8JFI1_CHLRE	A0A2K3E0N0_CHLRE	A0A2K3E6N9_CHLRE	A0A2K3E0Q0_CHLRE	A0A2K3E1U9_CHLRE	A0A2K3E1Z1_CHLRE	A0A2K3E1U5_CHLRE	A0A2K3CYG8_CHLRE	A0A2K3DPA4_CHLRE	A0A2K3DVX0_CHLRE	A0A2K3CZE1_CHLRE
molecular_function	GO:0051087	chaperone binding	11	35	0.314286	0.535515	0.607863	1	1	A8ITI2_CHLRE	A8IK66_CHLRE	A8ITJ1_CHLRE	A0A2K3D8U0_CHLRE	A0A2K3E797_CHLRE	A0A2K3DK66_CHLRE	A0A2K3CYR7_CHLRE	A0A2K3E7P3_CHLRE	A0A2K3CWA8_CHLRE	A0A2K3CTI6_CHLRE	A0A2K3CTA3_CHLRE
molecular_function	GO:0003713	transcription coactivator activity	11	22	0.5	0.998975	0.003518	1	0.625	A8JFR8_CHLRE	A8JCQ2_CHLRE	A0A2K3CY22_CHLRE	A0A2K3CYL1_CHLRE	A0A2K3CT32_CHLRE	A0A2K3CU44_CHLRE	A0A2K3DYA7_CHLRE	A0A2K3DAY1_CHLRE	A0A2K3D8E3_CHLRE	A0A2K3E001_CHLRE	A0A2K3DZW9_CHLRE
molecular_function	GO:0016279	protein-lysine N-methyltransferase activity	11	34	0.323529	0.985527	0.0281374	1	1	A0A2K3DNC3_CHLRE	A0A2K3DNL0_CHLRE	A0A2K3D9Q6_CHLRE	A0A2K3CZT4_CHLRE	A0A2K3D4Y3_CHLRE	A0A2K3CXD6_CHLRE	A0A2K3DZD1_CHLRE	A0A2K3CN37_CHLRE	A0A2K3DKY8_CHLRE	A0A2K3CZT3_CHLRE	A0A2K3DJ23_CHLRE
molecular_function	GO:0005227	calcium activated cation channel activity	11	15	0.733333	0.999798	0.00134366	1	0.343	A8JGH0_CHLRE	A0A2K3D019_CHLRE	A0A2K3D4W0_CHLRE	A0A2K3CRI9_CHLRE	A0A2K3DCX1_CHLRE	A0A2K3DPK2_CHLRE	A0A2K3DGI4_CHLRE	A0A2K3DBT5_CHLRE	A0A2K3D5I9_CHLRE	A0A2K3CZX5_CHLRE	A0A2K3D086_CHLRE
molecular_function	GO:0003678	DNA helicase activity	11	28	0.392857	0.99995	0.000155832	1	0.024	A0A2K3D3N5_CHLRE	A0A2K3DD36_CHLRE	A0A2K3D646_CHLRE	A0A2K3D1K3_CHLRE	A0A2K3D357_CHLRE	A0A2K3CMY7_CHLRE	A0A2K3DIP5_CHLRE	A0A2K3CW35_CHLRE	A0A2K3E4L1_CHLRE	A0A2K3DKS6_CHLRE	A0A2K3DJ45_CHLRE
molecular_function	GO:0004725	protein tyrosine phosphatase activity	11	31	0.354839	0.72039	0.418248	1	1	A0A2K3DHR0_CHLRE	A0A2K3DN43_CHLRE	A0A2K3DD10_CHLRE	A0A2K3DIK6_CHLRE	A0A2K3DG70_CHLRE	A0A2K3DD87_CHLRE	A0A2K3D6P9_CHLRE	A0A2K3DRH2_CHLRE	A0A2K3DE23_CHLRE	A0A2K3DIX2_CHLRE	A0A2K3DRI9_CHLRE
biological_process	GO:0018026	peptidyl-lysine monomethylation	11	31	0.354839	0.767321	0.362765	1	1	A0A2K3DNC3_CHLRE	A0A2K3DNL0_CHLRE	A0A2K3D9Q6_CHLRE	A0A2K3CZT4_CHLRE	A0A2K3D4Y3_CHLRE	A0A2K3CXD6_CHLRE	A0A2K3DZD1_CHLRE	A0A2K3CN37_CHLRE	A0A2K3DKY8_CHLRE	A0A2K3CZT3_CHLRE	A0A2K3DJ23_CHLRE
biological_process	GO:0050896	response to stimulus	11	34	0.323529	1	8.71062e-32	1	0	A0A2K3DHC0_CHLRE	A0A2K3D9S2_CHLRE	A0A2K3DD45_CHLRE	A0A2K3DRZ0_CHLRE	A0A2K3DRY5_CHLRE	A0A2K3CNT5_CHLRE	A0A2K3DD35_CHLRE	A0A2K3D9L6_CHLRE	A0A2K3DRV7_CHLRE	A0A2K3D0R9_CHLRE	A0A2K3DBM8_CHLRE
molecular_function	GO:0005543	phospholipid binding	11	19	0.578947	0.904193	0.155553	1	1	A0A2K3DXQ1_CHLRE	A0A2K3D2S4_CHLRE	A0A2K3E275_CHLRE	A0A2K3CNS3_CHLRE	A0A2K3CPF2_CHLRE	A0A2K3DS34_CHLRE	A0A2K3DMI4_CHLRE	A0A2K3DUI4_CHLRE	A0A2K3DEI5_CHLRE	A0A2K3DTC2_CHLRE	A0A2K3DMI1_CHLRE
molecular_function	GO:0017056	structural constituent of nuclear pore	11	23	0.478261	0.962009	0.0881106	1	1	A0A2K3DQA7_CHLRE	A0A2K3E0Z3_CHLRE	A0A2K3DI91_CHLRE	A0A2K3DGK4_CHLRE	A0A2K3D472_CHLRE	A0A2K3DMI4_CHLRE	A0A2K3CU41_CHLRE	A0A2K3D0V6_CHLRE	A0A2K3E0Z7_CHLRE	A0A2K3DMI1_CHLRE	A0A2K3DIH9_CHLRE
molecular_function	GO:0043138	3'-5' DNA helicase activity	11	14	0.785714	0.999943	0.00050667	1	0.117	A0A2K3E8E7_CHLRE	A0A2K3D249_CHLRE	A0A2K3CWC5_CHLRE	A0A2K3DIE7_CHLRE	A0A2K3DZT7_CHLRE	A0A2K3D356_CHLRE	A0A2K3DIJ9_CHLRE	A0A2K3DU69_CHLRE	A0A2K3E7T4_CHLRE	A0A2K3DKR2_CHLRE	A0A2K3D275_CHLRE
molecular_function	GO:0008408	3'-5' exonuclease activity	11	16	0.6875	0.997423	0.00593033	1	0.822	A0A2K3DZS1_CHLRE	A0A2K3CRN5_CHLRE	A0A2K3DK60_CHLRE	A0A2K3DB70_CHLRE	A0A2K3D9E7_CHLRE	A0A2K3E0R0_CHLRE	A0A2K3D0Y9_CHLRE	A0A2K3DZ32_CHLRE	A0A2K3DB72_CHLRE	A0A2K3DSJ8_CHLRE	A0A2K3E0R8_CHLRE
biological_process	GO:0042026	protein refolding	10	30	0.333333	0.683394	0.464923	1	1	A8J7K3_CHLRE	A8IHL1_CHLRE	A0A2K3E5B3_CHLRE	A0A2K3D5U1_CHLRE	A0A2K3CU73_CHLRE	A0A2K3DZS2_CHLRE	A0A2K3D556_CHLRE	A0A2K3E4D3_CHLRE	A0A2K3DFT6_CHLRE	A0A2K3CSA6_CHLRE
biological_process	GO:0000045	autophagosome assembly	10	19	0.526316	0.984235	0.0411516	1	1	A8JCL2_CHLRE	A0A2K3DE59_CHLRE	A0A2K3DFH4_CHLRE	A0A2K3D3V2_CHLRE	A0A2K3D0T3_CHLRE	A0A2K3E601_CHLRE	A0A2K3CSP3_CHLRE	A0A2K3CSX4_CHLRE	A0A2K3CUH9_CHLRE	A0A2K3DFR2_CHLRE
cellular_component	GO:0005615	extracellular space	10	61	0.163934	0.00768943	0.996934	0.508	1	A8I5R9_CHLRE	A8JB30_CHLRE	A8HVE0_CHLRE	A0A2K3DRJ1_CHLRE	A0A2K3CTF9_CHLRE	A0A2K3E0P5_CHLRE	A0A2K3DK05_CHLRE	A0A2K3D0Q4_CHLRE	A0A2K3DI22_CHLRE	A0A2K3E7R1_CHLRE
biological_process	GO:0006457	protein folding	10	87	0.114943	0.000112639	0.999951	0.021	1	A8ITI2_CHLRE	A0A2K3E797_CHLRE	A0A2K3DK66_CHLRE	A0A2K3DZE2_CHLRE	A0A2K3CYR7_CHLRE	A0A2K3DKF1_CHLRE	A0A2K3DVT4_CHLRE	A0A2K3CXM3_CHLRE	A0A2K3E769_CHLRE	A8I6Y0_CHLRE
molecular_function	GO:0004197	cysteine-type endopeptidase activity	10	31	0.322581	0.272343	0.832962	1	1	A8I5R9_CHLRE	A0A2K3CTF9_CHLRE	A0A2K3E6P0_CHLRE	A0A2K3E0M9_CHLRE	A0A2K3E5E1_CHLRE	A0A2K3E6M0_CHLRE	A0A2K3DK05_CHLRE	A0A2K3DI22_CHLRE	A0A2K3DYD0_CHLRE	A0A2K3E0J5_CHLRE
biological_process	GO:0016192	vesicle-mediated transport	10	48	0.208333	0.0519972	0.962102	1	1	A0A2K3DJL1_CHLRE	A0A2K3DSP0_CHLRE	A0A2K3CQE6_CHLRE	A0A2K3DIU6_CHLRE	A0A2K3D6F4_CHLRE	A0A2K3D8J7_CHLRE	A0A2K3D316_CHLRE	A0A2K3DSP2_CHLRE	A0A2K3DAZ7_CHLRE	A0A2K3D9H1_CHLRE
cellular_component	GO:0005789	endoplasmic reticulum membrane	10	86	0.116279	1.78457e-07	1	0	1	A8HXF2_CHLRE	A8IPU0_CHLRE	A0A2K3DPP3_CHLRE	A0A2K3DHT1_CHLRE	A0A2K3D0A9_CHLRE	A0A2K3CWH9_CHLRE	A0A2K3E0E4_CHLRE	A0A2K3DAX9_CHLRE	A8J5T5_CHLRE	A0A2K3DTI8_CHLRE
molecular_function	GO:0016757	glycosyltransferase activity	10	99	0.10101	4.50964e-05	0.999976	0.006	1	A0A2K3CV77_CHLRE	A0A2K3E6T6_CHLRE	A0A2K3DEQ8_CHLRE	A0A2K3DE93_CHLRE	A0A2K3DGH7_CHLRE	A0A2K3E0J0_CHLRE	A0A2K3D110_CHLRE	A0A2K3CU57_CHLRE	A0A2K3D8A2_CHLRE	A0A2K3DCF1_CHLRE
molecular_function	GO:0050661	NADP binding	10	30	0.333333	0.532594	0.617126	1	1	A0A2K3DQK3_CHLRE	A0A2K3D634_CHLRE	A0A2K3DQR7_CHLRE	A0A2K3CT13_CHLRE	A0A2K3DWJ9_CHLRE	A0A2K3DQS5_CHLRE	A0A2K3DQS9_CHLRE	A0A2K3DVK5_CHLRE	A0A2K3CRY4_CHLRE	A0A2K3D1A2_CHLRE
biological_process	GO:0071108	protein K48-linked deubiquitination	10	11	0.909091	0.999997	6.65084e-05	1	0.024	A8IIC5_CHLRE	A0A2K3DM47_CHLRE	A0A2K3CW95_CHLRE	A0A2K3DM82_CHLRE	A0A2K3DM45_CHLRE	A0A2K3DM73_CHLRE	A0A2K3DZ28_CHLRE	A0A2K3D076_CHLRE	A0A2K3DR81_CHLRE	A0A2K3DM57_CHLRE
cellular_component	GO:0015629	actin cytoskeleton	10	12	0.833333	0.973315	0.065659	1	1	A0A2K3DXQ1_CHLRE	A0A2K3DLJ0_CHLRE	A0A2K3D2S4_CHLRE	A0A2K3E275_CHLRE	A0A2K3CNS3_CHLRE	A0A2K3DS34_CHLRE	A0A2K3DUI4_CHLRE	A0A2K3DG07_CHLRE	A0A2K3DTC2_CHLRE	A0A2K3CZ40_CHLRE
biological_process	GO:0030433	ubiquitin-dependent ERAD pathway	10	32	0.3125	0.684358	0.456739	1	1	A0A2K3DK84_CHLRE	A0A2K3DPP3_CHLRE	A0A2K3E6G1_CHLRE	A0A2K3DYS1_CHLRE	A0A2K3DHD3_CHLRE	A0A2K3D8N2_CHLRE	A0A2K3E4D3_CHLRE	A0A2K3DJD0_CHLRE	A0A2K3DFT6_CHLRE	A0A2K3CWI3_CHLRE
cellular_component	GO:0005657	replication fork	10	18	0.555556	0.992745	0.016575	1	0.934	A0A2K3D646_CHLRE	A0A2K3E476_CHLRE	A0A2K3CR35_CHLRE	A0A2K3DP30_CHLRE	A0A2K3DKD8_CHLRE	A0A2K3DXZ9_CHLRE	A0A2K3DP13_CHLRE	A0A2K3CW35_CHLRE	A0A2K3DVI0_CHLRE	A0A2K3D4A8_CHLRE
biological_process	GO:0006260	DNA replication	10	27	0.37037	0.998335	0.00313861	1	0.774	A0A2K3D3N5_CHLRE	A0A2K3DNU1_CHLRE	A0A2K3D646_CHLRE	A0A2K3DA15_CHLRE	A0A2K3E476_CHLRE	A0A2K3D249_CHLRE	A0A2K3D357_CHLRE	A0A2K3DQM5_CHLRE	A0A2K3CW35_CHLRE	A0A2K3D450_CHLRE
molecular_function	GO:0005262	calcium channel activity	10	15	0.666667	0.999425	0.00226292	1	0.466	A0A2K3D134_CHLRE	A0A2K3E1S8_CHLRE	A0A2K3DV26_CHLRE	A0A2K3DBC1_CHLRE	A0A2K3DAJ9_CHLRE	A0A2K3DI77_CHLRE	A0A2K3CUP6_CHLRE	A0A2K3D286_CHLRE	A0A2K3E3A3_CHLRE	A0A2K3E1R4_CHLRE
molecular_function	GO:0000155	phosphorelay sensor kinase activity	10	12	0.833333	0.999966	0.000406269	1	0.096	A0A2K3E0G1_CHLRE	A0A2K3CZT1_CHLRE	A0A2K3DM16_CHLRE	A0A2K3D8G4_CHLRE	A0A2K3CR54_CHLRE	A0A2K3D7N7_CHLRE	A0A2K3DJT8_CHLRE	A0A2K3CX08_CHLRE	A0A2K3CR50_CHLRE	A0A2K3E771_CHLRE
biological_process	GO:0006805	xenobiotic metabolic process	10	11	0.909091	0.999978	0.000286854	1	0.099	A0A2K3D3A1_CHLRE	A0A2K3DLP6_CHLRE	A0A2K3DFM4_CHLRE	A0A2K3CUC8_CHLRE	A0A2K3DWL8_CHLRE	A0A2K3DE24_CHLRE	A0A2K3DP27_CHLRE	A0A2K3DF47_CHLRE	A0A2K3DK56_CHLRE	A0A2K3DN21_CHLRE
molecular_function	GO:0003735	structural constituent of ribosome	9	186	0.0483871	1.22839e-20	1	0	1	A8IWI1_CHLRE	A0A2K3CQY8_CHLRE	A0A2K3CV04_CHLRE	A0A2K3DDN8_CHLRE	A0A2K3CXT8_CHLRE	A0A2K3DSX4_CHLRE	A0A2K3D8F3_CHLRE	A0A2K3DXG4_CHLRE	A8IZK1_CHLRE
biological_process	GO:0006412	translation	9	167	0.0538922	8.75285e-19	1	0	1	A0A2K3CQY8_CHLRE	A0A2K3CV04_CHLRE	A0A2K3DDN8_CHLRE	A0A2K3DFE5_CHLRE	A0A2K3CXT8_CHLRE	A0A2K3DSX4_CHLRE	A0A2K3D8F3_CHLRE	A0A2K3CZ89_CHLRE	A8IZK1_CHLRE
biological_process	GO:0006508	proteolysis	9	46	0.195652	0.998576	0.00197226	1	0.535	A8J6C7_CHLRE	A8JB30_CHLRE	A0A2K3E0H1_CHLRE	A0A2K3DB77_CHLRE	A0A2K3CYD2_CHLRE	A0A2K3DZZ0_CHLRE	A0A2K3E6H2_CHLRE	A0A2K3D210_CHLRE	A0A2K3D3J6_CHLRE
biological_process	GO:0000226	microtubule cytoskeleton organization	9	28	0.321429	0.970805	0.043821	1	1	A0A2K3D881_CHLRE	A0A2K3E812_CHLRE	A0A2K3CRK3_CHLRE	A0A2K3DQX8_CHLRE	A0A2K3DV48_CHLRE	A0A2K3E3I9_CHLRE	A0A2K3E3N5_CHLRE	A0A2K3DF51_CHLRE	A0A2K3E1R1_CHLRE
cellular_component	GO:0000785	chromatin	9	20	0.45	0.875327	0.175059	1	1	A8HY72_CHLRE	A0A2K3DLE8_CHLRE	A0A2K3CUE4_CHLRE	A0A2K3E6Z2_CHLRE	A0A2K3DJ44_CHLRE	A0A2K3CRF0_CHLRE	A0A2K3CT82_CHLRE	A0A2K3DAW9_CHLRE	A0A2K3E1Q3_CHLRE
biological_process	GO:0007052	mitotic spindle organization	9	22	0.409091	0.935893	0.128587	1	1	A0A2K3DJB1_CHLRE	A0A2K3D0C9_CHLRE	A0A2K3CSI9_CHLRE	A0A2K3D170_CHLRE	A0A2K3CXB1_CHLRE	A0A2K3E377_CHLRE	A0A2K3DGG4_CHLRE	A0A2K3D589_CHLRE	A0A2K3DZA7_CHLRE
biological_process	GO:0000422	autophagy of mitochondrion	9	17	0.529412	0.991808	0.0270346	1	1	A0A2K3DE59_CHLRE	A0A2K3DFH4_CHLRE	A0A2K3D3V2_CHLRE	A0A2K3D0T3_CHLRE	A0A2K3CSP3_CHLRE	A0A2K3DDH3_CHLRE	A0A2K3CSX4_CHLRE	A0A2K3CUH9_CHLRE	A0A2K3DFR2_CHLRE
cellular_component	GO:0000139	Golgi membrane	9	58	0.155172	0.000746526	0.999719	0.064	1	A0A2K3CZQ1_CHLRE	A0A2K3E6T6_CHLRE	A0A2K3D8J7_CHLRE	A0A2K3DIR1_CHLRE	A0A2K3E5D5_CHLRE	A0A2K3E0E4_CHLRE	A0A2K3D8A2_CHLRE	A0A2K3D2H8_CHLRE	A8JBG7_CHLRE
biological_process	GO:0006303	double-strand break repair via nonhomologous end joining	9	11	0.818182	0.999933	0.000776263	1	0.244	A0A2K3DXG3_CHLRE	A0A2K3CPZ5_CHLRE	A0A2K3DNU1_CHLRE	A0A2K3E868_CHLRE	A0A2K3DA15_CHLRE	A0A2K3E5N7_CHLRE	A0A2K3D1K3_CHLRE	A0A2K3DCV7_CHLRE	A0A2K3D3M2_CHLRE
molecular_function	GO:0015297	antiporter activity	9	54	0.166667	0.000565661	0.999792	0.071	1	A0A2K3D7X3_CHLRE	A0A2K3DTZ1_CHLRE	A0A2K3E5B4_CHLRE	A0A2K3E569_CHLRE	A0A2K3CYB0_CHLRE	A0A2K3DTY2_CHLRE	A0A2K3E827_CHLRE	A0A2K3DFF0_CHLRE	A0A2K3DZ02_CHLRE
biological_process	GO:0018107	peptidyl-threonine phosphorylation	9	20	0.45	0.939631	0.136563	1	1	A8ILK6_CHLRE	A0A2K3DJG0_CHLRE	A0A2K3E5D4_CHLRE	A0A2K3E3Q1_CHLRE	A0A2K3E1W5_CHLRE	A0A2K3D697_CHLRE	A0A2K3DI28_CHLRE	A0A2K3CXG1_CHLRE	A0A2K3D5U0_CHLRE
molecular_function	GO:0009982	pseudouridine synthase activity	9	24	0.375	0.779928	0.364319	1	1	A8IQ91_CHLRE	A0A2K3D2W1_CHLRE	A0A2K3DQD0_CHLRE	A0A2K3CU62_CHLRE	A0A2K3CTU8_CHLRE	A0A2K3E0W3_CHLRE	A0A2K3DKZ4_CHLRE	A0A2K3E560_CHLRE	A0A2K3D895_CHLRE
biological_process	GO:0098703	calcium ion import across plasma membrane	9	15	0.6	0.995113	0.0194829	1	1	A0A2K3DGB6_CHLRE	A0A2K3D4R3_CHLRE	A0A2K3D1U7_CHLRE	A0A2K3DD06_CHLRE	A0A2K3DKM4_CHLRE	A0A2K3D1V4_CHLRE	A0A2K3E6L0_CHLRE	A0A2K3DSB6_CHLRE	A0A2K3CP03_CHLRE
biological_process	GO:0034727	piecemeal microautophagy of the nucleus	9	10	0.9	0.999933	0.000776263	1	0.244	A0A2K3DE59_CHLRE	A0A2K3DFH4_CHLRE	A0A2K3D3V2_CHLRE	A0A2K3D0T3_CHLRE	A0A2K3CTE2_CHLRE	A0A2K3CSP3_CHLRE	A0A2K3CSX4_CHLRE	A0A2K3CUH9_CHLRE	A0A2K3DFR2_CHLRE
cellular_component	GO:0034751	aryl hydrocarbon receptor complex	9	9	1	1	2.5206e-05	1	0.004	A0A2K3D3A1_CHLRE	A0A2K3DLP6_CHLRE	A0A2K3DFM4_CHLRE	A0A2K3DWL8_CHLRE	A0A2K3DE24_CHLRE	A0A2K3DP27_CHLRE	A0A2K3DF47_CHLRE	A0A2K3DK56_CHLRE	A0A2K3DN21_CHLRE
molecular_function	GO:0004879	nuclear receptor activity	9	10	0.9	0.999988	0.00027074	1	0.054	A0A2K3D3A1_CHLRE	A0A2K3DLP6_CHLRE	A0A2K3DFM4_CHLRE	A0A2K3DWL8_CHLRE	A0A2K3DE24_CHLRE	A0A2K3DP27_CHLRE	A0A2K3DF47_CHLRE	A0A2K3DK56_CHLRE	A0A2K3DN21_CHLRE
cellular_component	GO:0005576	extracellular region	8	28	0.285714	0.0165738	0.991377	0.807	1	A0A2K3E216_CHLRE	A0A2K3DB77_CHLRE	A0A2K3DRE4_CHLRE	A0A2K3DXV3_CHLRE	A0A2K3DSU8_CHLRE	A0A2K3CP43_CHLRE	A0A2K3DC56_CHLRE	A0A2K3E2Z7_CHLRE
biological_process	GO:0030150	protein import into mitochondrial matrix	8	19	0.421053	0.897724	0.212525	1	1	A8ITI2_CHLRE	A0A2K3DF96_CHLRE	A0A2K3E797_CHLRE	A0A2K3DK66_CHLRE	A0A2K3CYR7_CHLRE	A0A2K3E5S7_CHLRE	A0A2K3CTI6_CHLRE	A0A2K3DFP2_CHLRE
molecular_function	GO:0005249	voltage-gated potassium channel activity	8	14	0.571429	0.937104	0.149103	1	1	A8HPX4_CHLRE	A0A2K3D845_CHLRE	A0A2K3DJW6_CHLRE	A0A2K3DRI4_CHLRE	A0A2K3E4W0_CHLRE	A0A2K3D5Y0_CHLRE	A0A2K3D5Z6_CHLRE	A0A2K3E893_CHLRE
biological_process	GO:0071805	potassium ion transmembrane transport	8	18	0.444444	0.780224	0.372308	1	1	A8HPX4_CHLRE	A0A2K3DSM2_CHLRE	A0A2K3D845_CHLRE	A0A2K3DJW6_CHLRE	A0A2K3E4W0_CHLRE	A0A2K3D5Z6_CHLRE	A0A2K3CUH4_CHLRE	A0A2K3E893_CHLRE
biological_process	GO:0080142	regulation of salicylic acid biosynthetic process	8	13	0.615385	0.994718	0.0228031	1	1	A0A2K3DGV5_CHLRE	A0A2K3DGU5_CHLRE	A0A2K3DGS3_CHLRE	A0A2K3DGR0_CHLRE	A0A2K3DGS1_CHLRE	A0A2K3DND3_CHLRE	A0A2K3D4N7_CHLRE	A0A2K3DAG2_CHLRE
biological_process	GO:0006606	protein import into nucleus	8	30	0.266667	0.19174	0.896062	1	1	A0A2K3DI91_CHLRE	A0A2K3D0S5_CHLRE	A0A2K3D472_CHLRE	A0A2K3DMI4_CHLRE	A0A2K3D0V6_CHLRE	A0A2K3D8U6_CHLRE	A0A2K3E212_CHLRE	A0A2K3DMI1_CHLRE
molecular_function	GO:0030170	pyridoxal phosphate binding	8	47	0.170213	0.0146584	0.994376	0.953	1	A8J933_CHLRE	A0A2K3DUX7_CHLRE	A0A2K3DB14_CHLRE	A0A2K3CX34_CHLRE	A0A2K3CYU0_CHLRE	A0A2K3DB13_CHLRE	A0A2K3DVR8_CHLRE	A0A2K3CUB3_CHLRE
molecular_function	GO:0016779	nucleotidyltransferase activity	8	19	0.421053	0.462649	0.612429	1	1	A0FEN2_CHLRE	A0A2K3CYB5_CHLRE	A0A2K3CXD1_CHLRE	A0A2K3E5Z4_CHLRE	A0A2K3E7L8_CHLRE	A0A2K3DF32_CHLRE	A0A2K3DFJ6_CHLRE	A0A2K3DBH7_CHLRE
cellular_component	GO:0030687	preribosome, large subunit precursor	8	24	0.333333	0.641684	0.52633	1	1	A0A2K3E4R8_CHLRE	A0A2K3DLP0_CHLRE	A0A2K3DUC2_CHLRE	A0A2K3DCW4_CHLRE	A0A2K3DLG7_CHLRE	A0A2K3CPY6_CHLRE	A0A2K3D2R0_CHLRE	A0A2K3DWG3_CHLRE
biological_process	GO:0007049	cell cycle	8	22	0.363636	1	5.92098e-07	1	0	A8HY72_CHLRE	A0A2K3DGG6_CHLRE	A0A2K3DBV0_CHLRE	A0A2K3CTF3_CHLRE	A0A2K3D2G9_CHLRE	A0A2K3DAV8_CHLRE	A0A2K3DK49_CHLRE	A0A2K3D5S1_CHLRE
molecular_function	GO:0004386	helicase activity	8	18	0.444444	0.993801	0.0101961	1	0.943	A0A2K3DKJ5_CHLRE	A0A2K3DY75_CHLRE	A0A2K3CTK9_CHLRE	A0A2K3DU41_CHLRE	A0A2K3DR41_CHLRE	A0A2K3CWW2_CHLRE	A0A2K3DPR8_CHLRE	A0A2K3E7V6_CHLRE
cellular_component	GO:0005815	microtubule organizing center	8	16	0.5	0.91471	0.134278	1	1	A0A2K3D2P2_CHLRE	A0A2K3E8C8_CHLRE	A0A2K3CP68_CHLRE	A0A2K3E171_CHLRE	A0A2K3CV39_CHLRE	A0A2K3CQR3_CHLRE	A0A2K3D5F9_CHLRE	A0A2K3D5G1_CHLRE
molecular_function	GO:0016298	lipase activity	8	17	0.470588	0.999978	3.87547e-05	1	0.001	A0A2K3DDY4_CHLRE	A0A2K3E3X4_CHLRE	A0A2K3D085_CHLRE	A0A2K3E3Y4_CHLRE	A0A2K3DDY6_CHLRE	A0A2K3E3Z8_CHLRE	A0A2K3E3V7_CHLRE	A0A2K3E3Y8_CHLRE
molecular_function	GO:0043139	5'-3' DNA helicase activity	8	11	0.727273	0.998941	0.0071238	1	0.894	A0A2K3D3N5_CHLRE	A0A2K3DWS7_CHLRE	A0A2K3CRN5_CHLRE	A0A2K3D357_CHLRE	A0A2K3DME9_CHLRE	A0A2K3CRP0_CHLRE	A0A2K3DMF3_CHLRE	A0A2K3DF35_CHLRE
molecular_function	GO:0004499	N,N-dimethylaniline monooxygenase activity	8	11	0.727273	0.998941	0.0071238	1	0.894	A0A2K3DQK3_CHLRE	A0A2K3DQR7_CHLRE	A0A2K3CT13_CHLRE	A0A2K3DQS5_CHLRE	A0A2K3DQS9_CHLRE	A0A2K3DVK5_CHLRE	A0A2K3CRY4_CHLRE	A0A2K3D1A2_CHLRE
biological_process	GO:0001510	RNA methylation	8	15	0.533333	0.672976	0.426307	1	1	A0A2K3DA13_CHLRE	A0A2K3D1H3_CHLRE	A0A2K3D1H4_CHLRE	A0A2K3DT13_CHLRE	A0A2K3D8E4_CHLRE	A0A2K3CSN9_CHLRE	A0A2K3CSQ1_CHLRE	A0A2K3CMR1_CHLRE
cellular_component	GO:0005768	endosome	8	32	0.25	0.230094	0.837471	1	1	A8J6A0_CHLRE	A0A2K3D7N4_CHLRE	A0A2K3CPF2_CHLRE	A0A2K3DSV3_CHLRE	A0A2K3D063_CHLRE	A0A2K3DLC5_CHLRE	A0A2K3E128_CHLRE	A0A2K3CUH4_CHLRE
cellular_component	GO:0005643	nuclear pore	8	21	0.380952	0.699596	0.428034	1	1	A0A2K3D3L2_CHLRE	A0A2K3DQA7_CHLRE	A0A2K3E0Z3_CHLRE	A0A2K3DGK4_CHLRE	A0A2K3CU41_CHLRE	A0A2K3D060_CHLRE	A0A2K3CUU7_CHLRE	A0A2K3E0Z7_CHLRE
molecular_function	GO:0016274	protein-arginine N-methyltransferase activity	8	13	0.615385	0.996955	0.0125715	1	0.983	A0A2K3CWD9_CHLRE	A0A2K3E4A6_CHLRE	A0A2K3CWE5_CHLRE	A0A2K3DKS8_CHLRE	A0A2K3CWE7_CHLRE	A0A2K3DKU9_CHLRE	A0A2K3DKU3_CHLRE	A0A2K3DDC9_CHLRE
molecular_function	GO:0003779	actin binding	8	17	0.470588	0.946604	0.108545	1	1	A0A2K3DXQ1_CHLRE	A0A2K3D2S4_CHLRE	A0A2K3E275_CHLRE	A0A2K3CNS3_CHLRE	A0A2K3DKH9_CHLRE	A0A2K3DS34_CHLRE	A0A2K3DUI4_CHLRE	A0A2K3DTC2_CHLRE
cellular_component	GO:0005774	vacuolar membrane	8	17	0.470588	0.23248	0.869069	1	1	A0A2K3E3R5_CHLRE	A0A2K3E411_CHLRE	A0A2K3D593_CHLRE	A0A2K3E3P1_CHLRE	A0A2K3D4W5_CHLRE	A0A2K3D4W2_CHLRE	A0A2K3CVP7_CHLRE	A0A2K3D1B6_CHLRE
biological_process	GO:0031123	RNA 3'-end processing	8	11	0.727273	0.999998	7.38971e-06	1	0.003	A0FEN2_CHLRE	A0A2K3CQA0_CHLRE	A0A2K3CXD1_CHLRE	A0A2K3E5Z4_CHLRE	A0A2K3DS41_CHLRE	A0A2K3DCP4_CHLRE	A0A2K3DFK0_CHLRE	A0A2K3DBH7_CHLRE
molecular_function	GO:0009927	histidine phosphotransfer kinase activity	8	10	0.8	0.999729	0.00271277	1	0.541	A0A2K3E0G1_CHLRE	A0A2K3CZT1_CHLRE	A0A2K3DM16_CHLRE	A0A2K3D8G4_CHLRE	A0A2K3CR54_CHLRE	A0A2K3DJT8_CHLRE	A0A2K3CX08_CHLRE	A0A2K3E771_CHLRE
molecular_function	GO:0004713	protein tyrosine kinase activity	8	11	0.727273	0.998941	0.0071238	1	0.894	A0A2K3E5N6_CHLRE	A0A2K3E5D4_CHLRE	A0A2K3E3Q1_CHLRE	A0A2K3DCV0_CHLRE	A0A2K3DI28_CHLRE	A0A2K3DDK5_CHLRE	A8JFV0_CHLRE	A0A2K3DDL0_CHLRE
biological_process	GO:0000184	nuclear-transcribed mRNA catabolic process, nonsense-mediated decay	8	14	0.571429	0.980517	0.0611047	1	1	A0A2K3D496_CHLRE	A0A2K3DBK7_CHLRE	A0A2K3CSR2_CHLRE	A0A2K3CQV6_CHLRE	A0A2K3DVM2_CHLRE	A0A2K3CZR0_CHLRE	A0A2K3DN17_CHLRE	A0A2K3DKW8_CHLRE
molecular_function	GO:0008420	RNA polymerase II CTD heptapeptide repeat phosphatase activity	8	12	0.666667	0.996984	0.0153399	1	0.996	A0A2K3DPN5_CHLRE	A0A2K3DM11_CHLRE	A0A2K3DLV7_CHLRE	A0A2K3DLU3_CHLRE	A0A2K3DLZ6_CHLRE	A0A2K3DLW3_CHLRE	A0A2K3D4X0_CHLRE	A0A2K3DPP9_CHLRE
biological_process	GO:0070940	dephosphorylation of RNA polymerase II C-terminal domain	8	12	0.666667	0.997756	0.0120206	1	0.997	A0A2K3DPN5_CHLRE	A0A2K3DM11_CHLRE	A0A2K3DLV7_CHLRE	A0A2K3DLU3_CHLRE	A0A2K3DLZ6_CHLRE	A0A2K3DLW3_CHLRE	A0A2K3D4X0_CHLRE	A0A2K3DPP9_CHLRE
cellular_component	GO:0005654	nucleoplasm	8	32	0.25	0.973471	0.0381554	1	1	A0A2K3DL40_CHLRE	A0A2K3DI01_CHLRE	A0A2K3CW52_CHLRE	A0A2K3CUP8_CHLRE	A0A2K3DQK7_CHLRE	A0A2K3DAX6_CHLRE	A0A2K3CZM3_CHLRE	A0A2K3DKK4_CHLRE
biological_process	GO:0042276	error-prone translesion synthesis	8	10	0.8	0.999804	0.00206543	1	0.588	A0A2K3CR35_CHLRE	A0A2K3D660_CHLRE	A0A2K3DKD8_CHLRE	A0A2K3DVI0_CHLRE	A0A2K3DDR6_CHLRE	A0A2K3D4A8_CHLRE	A0A2K3D9E2_CHLRE	A0A2K3D744_CHLRE
biological_process	GO:0032508	DNA duplex unwinding	8	19	0.421053	0.846378	0.270044	1	1	A0A2K3D646_CHLRE	A0A2K3E476_CHLRE	A0A2K3CWC5_CHLRE	A0A2K3CW35_CHLRE	A0A2K3D356_CHLRE	A0A2K3DU69_CHLRE	A0A2K3DJ45_CHLRE	A0A2K3D275_CHLRE
biological_process	GO:0044805	late nucleophagy	8	9	0.888889	0.999973	0.000569529	1	0.199	A0A2K3DE59_CHLRE	A0A2K3DFH4_CHLRE	A0A2K3D3V2_CHLRE	A0A2K3D0T3_CHLRE	A0A2K3CSP3_CHLRE	A0A2K3DDH3_CHLRE	A0A2K3CUH9_CHLRE	A0A2K3DFR2_CHLRE
biological_process	GO:0061709	reticulophagy	8	8	1	1	8.74008e-05	1	0.035	A0A2K3DE59_CHLRE	A0A2K3DFH4_CHLRE	A0A2K3D3V2_CHLRE	A0A2K3D0T3_CHLRE	A0A2K3CSP3_CHLRE	A0A2K3CSX4_CHLRE	A0A2K3CUH9_CHLRE	A0A2K3DFR2_CHLRE
biological_process	GO:0006302	double-strand break repair	8	13	0.615385	1	2.87931e-13	1	0	A0A2K3CTR8_CHLRE	A0A2K3CRF8_CHLRE	A0A2K3CRE2_CHLRE	A0A2K3DQG4_CHLRE	A0A2K3D8A8_CHLRE	A0A2K3E874_CHLRE	A0A2K3DMG2_CHLRE	A0A2K3DGR3_CHLRE
biological_process	GO:0006351	transcription, DNA-templated	7	27	0.259259	1	2.70713e-27	1	0	RPOC2_CHLRE	Q65Z16_CHLRE	A0A2K3E015_CHLRE	A0A2K3CWA4_CHLRE	A0A2K3CYX2_CHLRE	A0A2K3CZM3_CHLRE	A0A2K3E4Z6_CHLRE
biological_process	GO:0000278	mitotic cell cycle	7	20	0.35	0.999993	1.48545e-05	1	0.006	A0A2K3E461_CHLRE	A0A2K3DYA1_CHLRE	A0A2K3D9V2_CHLRE	A0A2K3DXP3_CHLRE	A0A2K3CVH5_CHLRE	A0A2K3E647_CHLRE	A0A2K3DWK1_CHLRE
molecular_function	GO:0046982	protein heterodimerization activity	7	49	0.142857	0.00343612	0.998914	0.447	1	A8JFR8_CHLRE	A0A2K3D4R7_CHLRE	A0A2K3DKK9_CHLRE	A0A2K3DUP2_CHLRE	A0A2K3DYI1_CHLRE	A0A2K3DSI6_CHLRE	A0A2K3D5T2_CHLRE
biological_process	GO:0006334	nucleosome assembly	7	36	0.194444	0.0488505	0.979511	1	1	A0A2K3DQN3_CHLRE	A0A2K3D677_CHLRE	A0A2K3DBS6_CHLRE	A0A2K3CVF1_CHLRE	A0A2K3DTZ3_CHLRE	A0A2K3DDK1_CHLRE	A0A2K3E1Q3_CHLRE
cellular_component	GO:0005743	mitochondrial inner membrane	7	71	0.0985915	6.55931e-08	1	0	1	A0A2K3DA89_CHLRE	A0A2K3DS66_CHLRE	A0A2K3CUM3_CHLRE	A0A2K3D1B2_CHLRE	A0A2K3CTI6_CHLRE	A0A2K3DD62_CHLRE	A0A2K3DCT0_CHLRE
biological_process	GO:0008380	RNA splicing	7	19	0.368421	0.0459638	0.969214	1	1	A0A2K3DDS0_CHLRE	A0A2K3DBK7_CHLRE	A0A2K3DL17_CHLRE	A0A2K3DXU4_CHLRE	A0A2K3E1C6_CHLRE	A0A2K3E1G4_CHLRE	A0A2K3DL39_CHLRE
biological_process	GO:0006270	DNA replication initiation	7	14	0.5	0.915943	0.175943	1	1	A8J6Q4_CHLRE	A0A2K3D3Q7_CHLRE	A0A2K3CRZ4_CHLRE	A0A2K3DBH8_CHLRE	A0A2K3DLK2_CHLRE	A0A2K3DW68_CHLRE	A0A2K3DLB4_CHLRE
cellular_component	GO:0000932	P-body	7	24	0.291667	0.527434	0.646704	1	1	A8IMK5_CHLRE	A0A2K3CYY3_CHLRE	A0A2K3D6Y2_CHLRE	A0A2K3DP46_CHLRE	A0A2K3D9Y9_CHLRE	A0A2K3DKF3_CHLRE	A0A2K3DYW2_CHLRE
biological_process	GO:0006623	protein targeting to vacuole	7	13	0.538462	0.977197	0.074605	1	1	A0A2K3D1H8_CHLRE	A0A2K3CQQ3_CHLRE	A0A2K3D1G5_CHLRE	A0A2K3DZT8_CHLRE	A0A2K3CQS6_CHLRE	A0A2K3DQL6_CHLRE	A0A2K3D1L1_CHLRE
cellular_component	GO:0032040	small-subunit processome	7	35	0.2	0.11014	0.947944	1	1	A0A2K3DK03_CHLRE	A0A2K3D8I9_CHLRE	A0A2K3D8K1_CHLRE	A0A2K3DKU8_CHLRE	A0A2K3DU20_CHLRE	A0A2K3DCA0_CHLRE	A8HXG8_CHLRE
biological_process	GO:0000723	telomere maintenance	7	14	0.5	0.998699	0.00444939	1	0.857	A0A2K3D646_CHLRE	A0A2K3D1K3_CHLRE	A0A2K3CMY7_CHLRE	A0A2K3DXZ9_CHLRE	A0A2K3CW35_CHLRE	A0A2K3E4L1_CHLRE	A0A2K3DCC3_CHLRE
cellular_component	GO:0019898	extrinsic component of membrane	7	24	0.291667	0.656606	0.479796	1	1	A8IHH9_CHLRE	A0A2K3CQQ3_CHLRE	A0A2K3DFH4_CHLRE	A0A2K3CTE2_CHLRE	A0A2K3CSX4_CHLRE	A0A2K3CQS6_CHLRE	A0A2K3D1L1_CHLRE
biological_process	GO:0051726	regulation of cell cycle	7	10	0.7	0.999944	0.000124971	1	0.043	A0A2K3DJG0_CHLRE	A0A2K3CZT4_CHLRE	A0A2K3D697_CHLRE	A0A2K3CVZ7_CHLRE	A0A2K3CXG1_CHLRE	A0A2K3CZM3_CHLRE	Q1ZZK3_CHLRE
molecular_function	GO:0031267	small GTPase binding	7	20	0.35	0.697008	0.481729	1	1	A0A2K3CQE6_CHLRE	A0A2K3D3L2_CHLRE	A0A2K3D1Z8_CHLRE	A0A2K3CWJ4_CHLRE	A0A2K3DRE9_CHLRE	A0A2K3DP34_CHLRE	A0A2K3E212_CHLRE
molecular_function	GO:0004553	hydrolase activity, hydrolyzing O-glycosyl compounds	7	20	0.35	0.592189	0.513565	1	1	A0A2K3DQ89_CHLRE	A0A2K3D387_CHLRE	A0A2K3D0F8_CHLRE	A0A2K3D2V6_CHLRE	A0A2K3D370_CHLRE	A0A2K3DKS3_CHLRE	A0A2K3D2A2_CHLRE
cellular_component	GO:0034045	phagophore assembly site membrane	7	11	0.636364	0.994801	0.0252783	1	0.972	A0A2K3DE59_CHLRE	A0A2K3D3V2_CHLRE	A0A2K3D0T3_CHLRE	A0A2K3CSP3_CHLRE	A0A2K3CSX4_CHLRE	A0A2K3CUH9_CHLRE	A0A2K3DFR2_CHLRE
molecular_function	GO:0015095	magnesium ion transmembrane transporter activity	7	14	0.5	0.951708	0.130489	1	1	A0A2K3DG46_CHLRE	A0A2K3DQB3_CHLRE	A0A2K3E423_CHLRE	A0A2K3D736_CHLRE	A0A2K3E6W7_CHLRE	A0A2K3D933_CHLRE	A0A2K3CZ59_CHLRE
biological_process	GO:0006289	nucleotide-excision repair	7	15	0.466667	0.990735	0.0235657	1	1	A0A2K3DD36_CHLRE	A0A2K3CQ68_CHLRE	A0A2K3DCB3_CHLRE	A0A2K3DX60_CHLRE	A0A2K3D5Q5_CHLRE	A0A2K3D2Z8_CHLRE	A0A2K3E8G5_CHLRE
biological_process	GO:0030488	tRNA methylation	7	23	0.304348	0.273864	0.835635	1	1	A0A2K3E6I5_CHLRE	A0A2K3CYD6_CHLRE	A0A2K3DT17_CHLRE	A0A2K3DTW5_CHLRE	A0A2K3DTN8_CHLRE	A0A2K3CU03_CHLRE	A0A2K3CT40_CHLRE
molecular_function	GO:0005539	glycosaminoglycan binding	7	19	0.368421	0.752465	0.419171	1	1	A0A2K3E5J3_CHLRE	A0A2K3E0X7_CHLRE	A0A2K3DJS0_CHLRE	A0A2K3E5H9_CHLRE	A0A2K3E179_CHLRE	A0A2K3E0V8_CHLRE	A0A2K3DT51_CHLRE
molecular_function	GO:0008449	N-acetylglucosamine-6-sulfatase activity	7	19	0.368421	0.752465	0.419171	1	1	A0A2K3E5J3_CHLRE	A0A2K3E0X7_CHLRE	A0A2K3DJS0_CHLRE	A0A2K3E5H9_CHLRE	A0A2K3E179_CHLRE	A0A2K3E0V8_CHLRE	A0A2K3DT51_CHLRE
biological_process	GO:0061024	membrane organization	7	8	0.875	0.650668	0.431236	1	1	A0A2K3DXQ1_CHLRE	A0A2K3D2S4_CHLRE	A0A2K3E275_CHLRE	A0A2K3CNS3_CHLRE	A0A2K3DS34_CHLRE	A0A2K3DUI4_CHLRE	A0A2K3DTC2_CHLRE
biological_process	GO:0006813	potassium ion transport	7	15	0.466667	0.919291	0.144616	1	1	A0A2K3CPV9_CHLRE	A0A2K3DT89_CHLRE	A0A2K3DG90_CHLRE	A0A2K3DT99_CHLRE	A0A2K3CPT7_CHLRE	A0A2K3DTC6_CHLRE	A0A2K3CPT6_CHLRE
biological_process	GO:0036158	outer dynein arm assembly	7	11	0.636364	0.994497	0.0264752	1	1	A8IJZ3_CHLRE	A0A2K3D8D3_CHLRE	A0A2K3D798_CHLRE	A0A2K3DM40_CHLRE	A0A2K3DDL5_CHLRE	A0A2K3CUD8_CHLRE	A0A2K3E4N3_CHLRE
molecular_function	GO:0004402	histone acetyltransferase activity	7	10	0.7	0.996984	0.0153399	1	0.996	A0A2K3DIE5_CHLRE	A0A2K3DIE3_CHLRE	A0A2K3CZQ1_CHLRE	A0A2K3DYA7_CHLRE	A0A2K3DS27_CHLRE	A0A2K3E001_CHLRE	A0A2K3DZW9_CHLRE
cellular_component	GO:0012507	ER to Golgi transport vesicle membrane	7	14	0.5	0.952981	0.107478	1	1	A0A2K3D9Y7_CHLRE	A0A2K3DI38_CHLRE	A0A2K3D7D0_CHLRE	A0A2K3D1M4_CHLRE	A0A2K3CQU9_CHLRE	A0A2K3E5D5_CHLRE	A0A2K3E7U8_CHLRE
cellular_component	GO:0000445	THO complex part of transcription export complex	7	11	0.636364	0.994801	0.0252783	1	0.972	A0A2K3CPA3_CHLRE	A0A2K3CYY4_CHLRE	A0A2K3D2S9_CHLRE	A0A2K3E683_CHLRE	A0A2K3D0N2_CHLRE	A0A2K3CSB0_CHLRE	A0A2K3D4Y9_CHLRE
molecular_function	GO:0018024	histone-lysine N-methyltransferase activity	7	12	0.583333	0.999729	0.00128564	1	0.331	A8I904_CHLRE	A0A2K3DP74_CHLRE	A0A2K3DVS8_CHLRE	A0A2K3CWM2_CHLRE	A0A2K3E2U5_CHLRE	A0A2K3CT27_CHLRE	A0A2K3E5V3_CHLRE
biological_process	GO:0000160	phosphorelay signal transduction system	7	9	0.777778	0.99965	0.00225703	1	0.634	A0A2K3CVU2_CHLRE	A0A2K3DSF4_CHLRE	A0A2K3D199_CHLRE	A0A2K3E1G1_CHLRE	A0A2K3CWZ0_CHLRE	A0A2K3DFR6_CHLRE	A0A2K3CV79_CHLRE
cellular_component	GO:0031235	intrinsic component of the cytoplasmic side of the plasma membrane	7	7	1	1	0.000265598	1	0.043	A0A2K3DXQ1_CHLRE	A0A2K3D2S4_CHLRE	A0A2K3E275_CHLRE	A0A2K3CNS3_CHLRE	A0A2K3DS34_CHLRE	A0A2K3DUI4_CHLRE	A0A2K3DTC2_CHLRE
biological_process	GO:0030031	cell projection assembly	7	8	0.875	0.877324	0.170422	1	1	A0A2K3DXQ1_CHLRE	A0A2K3D2S4_CHLRE	A0A2K3E275_CHLRE	A0A2K3CNS3_CHLRE	A0A2K3DS34_CHLRE	A0A2K3DUI4_CHLRE	A0A2K3DTC2_CHLRE
cellular_component	GO:0005847	mRNA cleavage and polyadenylation specificity factor complex	7	12	0.583333	0.988612	0.0447243	1	1	A0A2K3CWY4_CHLRE	A0A2K3E1R0_CHLRE	A0A2K3CVP9_CHLRE	A0A2K3E6B7_CHLRE	A0A2K3DIA8_CHLRE	A0A2K3CVQ7_CHLRE	A0A2K3E241_CHLRE
biological_process	GO:0006261	DNA-dependent DNA replication	7	15	0.466667	0.999029	0.00208866	1	0.589	A0A2K3E6P6_CHLRE	A0A2K3CTR8_CHLRE	A0A2K3DZJ0_CHLRE	A0A2K3CRE2_CHLRE	A0A2K3DMG2_CHLRE	A0A2K3DGR3_CHLRE	A0A2K3D9E2_CHLRE
cellular_component	GO:0000922	spindle pole	7	12	0.583333	0.978334	0.0716261	1	1	A0A2K3D479_CHLRE	A0A2K3E461_CHLRE	A0A2K3DYA1_CHLRE	A0A2K3D9V2_CHLRE	A0A2K3E171_CHLRE	A0A2K3D3H1_CHLRE	A0A2K3E647_CHLRE
molecular_function	GO:0070740	tubulin-glutamic acid ligase activity	7	12	0.583333	0.98466	0.0567084	1	1	A0A2K3D881_CHLRE	A0A2K3E812_CHLRE	A0A2K3DQX8_CHLRE	A0A2K3DV48_CHLRE	A0A2K3E3I9_CHLRE	A0A2K3E3N5_CHLRE	A0A2K3DF51_CHLRE
biological_process	GO:0018095	protein polyglutamylation	7	12	0.583333	0.987979	0.0467117	1	1	A0A2K3D881_CHLRE	A0A2K3E812_CHLRE	A0A2K3DQX8_CHLRE	A0A2K3DV48_CHLRE	A0A2K3E3I9_CHLRE	A0A2K3E3N5_CHLRE	A0A2K3DF51_CHLRE
biological_process	GO:0036297	interstrand cross-link repair	7	10	0.7	0.999224	0.00550319	1	0.928	A0A2K3E8E7_CHLRE	A0A2K3E868_CHLRE	A0A2K3DLA7_CHLRE	A0A2K3DZT7_CHLRE	A0A2K3CTH8_CHLRE	A0A2K3DCV7_CHLRE	A0A2K3D3M2_CHLRE
molecular_function	GO:0008574	plus-end-directed microtubule motor activity	7	10	0.7	0.997287	0.0163794	1	1	A0A2K3D0X3_CHLRE	A0A2K3E630_CHLRE	A0A2K3DJH8_CHLRE	A0A2K3CRT3_CHLRE	A0A2K3CVQ1_CHLRE	A0A2K3D1P0_CHLRE	A0A2K3DC11_CHLRE
molecular_function	GO:0042910	xenobiotic transmembrane transporter activity	7	19	0.368421	0.779928	0.364319	1	1	A0A2K3DTZ1_CHLRE	A0A2K3E5B4_CHLRE	A0A2K3E569_CHLRE	A0A2K3CYB0_CHLRE	A0A2K3DTY2_CHLRE	A0A2K3E827_CHLRE	A0A2K3DZ02_CHLRE
biological_process	GO:0000077	DNA damage checkpoint signaling	7	8	0.875	0.988948	0.028325	1	1	A0A2K3CYK0_CHLRE	A0A2K3DYP3_CHLRE	A0A2K3DTE2_CHLRE	A0A2K3DUS4_CHLRE	A0A2K3DWH4_CHLRE	A0A2K3DCC3_CHLRE	A0A2K3D131_CHLRE
cellular_component	GO:0043229	intracellular organelle	7	11	0.636364	0.924034	0.0830556	1	1	A0A2K3DFE5_CHLRE	A0A2K3DHR8_CHLRE	A0A2K3CZ97_CHLRE	A0A2K3D1G0_CHLRE	A0A2K3DLD4_CHLRE	A0A2K3CZ89_CHLRE	A0A2K3DNI5_CHLRE
biological_process	GO:0042594	response to starvation	7	7	1	0.996533	0.0118859	1	0.997	A0A2K3DE59_CHLRE	A0A2K3E4Z7_CHLRE	A0A2K3D3V2_CHLRE	A0A2K3D0T3_CHLRE	A0A2K3CSP3_CHLRE	A0A2K3CUH9_CHLRE	A0A2K3DFR2_CHLRE
cellular_component	GO:0005694	chromosome	7	14	0.5	0.999981	3.43637e-05	1	0.004	A0A2K3CWC5_CHLRE	A0A2K3D1W3_CHLRE	A0A2K3DQG4_CHLRE	A0A2K3DK49_CHLRE	A0A2K3D356_CHLRE	A0A2K3DU69_CHLRE	A0A2K3D275_CHLRE
cellular_component	GO:0005840	ribosome	6	62	0.0967742	1.35873e-18	1	0	1	A0A2K3DYE1_CHLRE	A0A2K3CQY8_CHLRE	A0A2K3DDN8_CHLRE	A0A2K3CN25_CHLRE	A0A2K3CXT8_CHLRE	A8IZK1_CHLRE
molecular_function	GO:0051539	4 iron, 4 sulfur cluster binding	6	59	0.101695	6.50332e-05	0.999986	0.007	1	E0YRV5_CHLRE	A0A2K3DLL0_CHLRE	A0A2K3DXP3_CHLRE	A0A2K3CPL6_CHLRE	A0A2K3DGD3_CHLRE	A8I815_CHLRE
molecular_function	GO:0043023	ribosomal large subunit binding	6	14	0.428571	0.869511	0.28124	1	1	A0A2K3CRB8_CHLRE	A0A2K3CWM1_CHLRE	A0A2K3DZ16_CHLRE	A0A2K3CWM0_CHLRE	A0A2K3DM03_CHLRE	A0A2K3E220_CHLRE
biological_process	GO:0016226	iron-sulfur cluster assembly	6	21	0.285714	0.571653	0.60656	1	1	A0A2K3DHM0_CHLRE	A0A2K3CPM4_CHLRE	A0A2K3D614_CHLRE	A0A2K3D634_CHLRE	A0A2K3CPL6_CHLRE	A0A2K3D1E4_CHLRE
molecular_function	GO:0004521	endoribonuclease activity	6	11	0.545455	0.95994	0.0738348	1	1	A0A2K3DHA4_CHLRE	A0A2K3DEK5_CHLRE	A0A2K3E6R8_CHLRE	A0A2K3E457_CHLRE	A0A2K3DRE4_CHLRE	A0A2K3DH95_CHLRE
molecular_function	GO:0008061	chitin binding	6	16	0.375	0.765863	0.418359	1	1	A0A2K3DBP8_CHLRE	A0A2K3DB77_CHLRE	A0A2K3E4S5_CHLRE	A0A2K3DRZ4_CHLRE	A0A2K3DBQ5_CHLRE	A0A2K3DBP7_CHLRE
molecular_function	GO:0106306	protein serine/threonine phosphatase activity	6	34	0.176471	NA	NA	NA	NA	A0A2K3E0S8_CHLRE	A0A2K3DPE5_CHLRE	A0A2K3DPC6_CHLRE	A0A2K3D365_CHLRE	A0A2K3CU27_CHLRE	A0A2K3D4X0_CHLRE
molecular_function	GO:0106307	protein serine/threonine phosphatase activity	6	34	0.176471	NA	NA	NA	NA	A0A2K3E0S8_CHLRE	A0A2K3DPE5_CHLRE	A0A2K3DPC6_CHLRE	A0A2K3D365_CHLRE	A0A2K3CU27_CHLRE	A0A2K3D4X0_CHLRE
cellular_component	GO:0016592	mediator complex	6	17	0.352941	0.750439	0.434294	1	1	A0A2K3CYN0_CHLRE	A0A2K3DTW3_CHLRE	A0A2K3D6P5_CHLRE	A0A2K3D8E3_CHLRE	A0A2K3D356_CHLRE	A0A2K3DJ05_CHLRE
biological_process	GO:0051603	proteolysis involved in cellular protein catabolic process	6	24	0.25	0.990944	0.0125458	1	0.997	A8I5R9_CHLRE	A0A2K3CTF9_CHLRE	A0A2K3D3Y4_CHLRE	A0A2K3DK05_CHLRE	A0A2K3DI22_CHLRE	A0A2K3D637_CHLRE
biological_process	GO:0007064	mitotic sister chromatid cohesion	6	9	0.666667	1	7.73242e-07	1	0	A0A2K3DFV4_CHLRE	A0A2K3CWG1_CHLRE	A0A2K3E6Z2_CHLRE	A0A2K3D5W6_CHLRE	A0A2K3DFQ1_CHLRE	A0A2K3D7X0_CHLRE
biological_process	GO:0032465	regulation of cytokinesis	6	14	0.428571	0.91021	0.20279	1	1	A0A2K3DYA1_CHLRE	A0A2K3CSI9_CHLRE	A0A2K3D170_CHLRE	A0A2K3E377_CHLRE	A0A2K3DGG4_CHLRE	A0A2K3D589_CHLRE
molecular_function	GO:0008374	O-acyltransferase activity	6	17	0.352941	0.246642	0.860215	1	1	A0A2K3DL67_CHLRE	A8JH70_CHLRE	A0A2K3D6C2_CHLRE	A0A2K3DL79_CHLRE	A0A2K3D5L6_CHLRE	A0A2K3E247_CHLRE
biological_process	GO:0008033	tRNA processing	6	13	0.461538	0.846613	0.20548	1	1	A0A2K3DP38_CHLRE	A0A2K3CZS8_CHLRE	A0A2K3E136_CHLRE	A0A2K3E560_CHLRE	A0A2K3DTS7_CHLRE	A0A2K3DYH6_CHLRE
molecular_function	GO:0003688	DNA replication origin binding	6	10	0.6	0.983621	0.066545	1	1	A8J6Q4_CHLRE	A0A2K3CRZ4_CHLRE	A0A2K3DBH8_CHLRE	A0A2K3DLK2_CHLRE	A0A2K3DLB4_CHLRE	A8JFM6_CHLRE
biological_process	GO:0006298	mismatch repair	6	16	0.375	0.833896	0.315315	1	1	A0A2K3DLY5_CHLRE	A0A2K3D5Q5_CHLRE	A0A2K3E5S7_CHLRE	A0A2K3CSI1_CHLRE	A8I815_CHLRE	A0A2K3E7C9_CHLRE
cellular_component	GO:0005680	anaphase-promoting complex	6	12	0.5	0.955276	0.13195	1	1	A0A2K3DBV0_CHLRE	A0A2K3CVZ5_CHLRE	A0A2K3CRQ2_CHLRE	A0A2K3CZ15_CHLRE	A0A2K3D5S1_CHLRE	A0A2K3D074_CHLRE
molecular_function	GO:0043022	ribosome binding	6	33	0.181818	0.0552847	0.977951	1	1	A0A2K3DYE1_CHLRE	A0A2K3DX45_CHLRE	A0A2K3DLF6_CHLRE	A0A2K3DER8_CHLRE	A0A2K3DLG8_CHLRE	A0A2K3DHP9_CHLRE
biological_process	GO:0016573	histone acetylation	6	13	0.461538	0.981148	0.0497719	1	1	A0A2K3E264_CHLRE	A0A2K3D7H3_CHLRE	A0A2K3DYA7_CHLRE	A0A2K3CZB2_CHLRE	A0A2K3E001_CHLRE	A0A2K3DZW9_CHLRE
biological_process	GO:0006338	chromatin remodeling	6	15	0.4	0.725894	0.394236	1	1	A0A2K3CXW3_CHLRE	A0A2K3D3P2_CHLRE	A0A2K3DFS6_CHLRE	A0A2K3DX10_CHLRE	A0A2K3E7A1_CHLRE	A0A2K3DS27_CHLRE
biological_process	GO:0006268	DNA unwinding involved in DNA replication	6	12	0.5	0.953288	0.136409	1	1	A0A2K3CQ68_CHLRE	A0A2K3DIP5_CHLRE	A0A2K3CWC5_CHLRE	A0A2K3D356_CHLRE	A0A2K3DU69_CHLRE	A0A2K3D275_CHLRE
cellular_component	GO:0008180	COP9 signalosome	6	27	0.222222	0.225654	0.884365	1	1	A0A2K3DSG1_CHLRE	A0A2K3E1M0_CHLRE	A0A2K3CX22_CHLRE	A0A2K3CYL5_CHLRE	A0A2K3E1I4_CHLRE	A0A2K3E1L2_CHLRE
biological_process	GO:0000338	protein deneddylation	6	23	0.26087	0.39344	0.768784	1	1	A0A2K3DSG1_CHLRE	A0A2K3E1M0_CHLRE	A0A2K3CX22_CHLRE	A0A2K3CYL5_CHLRE	A0A2K3E1I4_CHLRE	A0A2K3E1L2_CHLRE
cellular_component	GO:0035861	site of double-strand break	6	11	0.545455	0.974722	0.0883372	1	1	A0A2K3DUT4_CHLRE	A0A2K3CR35_CHLRE	A0A2K3DKD8_CHLRE	A0A2K3D4E3_CHLRE	A0A2K3DVI0_CHLRE	A0A2K3D4A8_CHLRE
molecular_function	GO:0051959	dynein light intermediate chain binding	6	13	0.461538	0.910609	0.216632	1	1	A0A2K3D8D3_CHLRE	A0A2K3CYE9_CHLRE	A0A2K3DN16_CHLRE	A0A2K3E5K1_CHLRE	A0A2K3E6A9_CHLRE	A0A2K3DQQ4_CHLRE
cellular_component	GO:0005795	Golgi stack	6	10	0.6	0.879988	0.249561	1	1	A0A2K3D9Y7_CHLRE	A0A2K3DI38_CHLRE	A0A2K3D7D0_CHLRE	A0A2K3D1M4_CHLRE	A0A2K3CQU9_CHLRE	A0A2K3E7U8_CHLRE
biological_process	GO:0048211	Golgi vesicle docking	6	10	0.6	0.986871	0.0560593	1	1	A0A2K3D9Y7_CHLRE	A0A2K3DI38_CHLRE	A0A2K3D7D0_CHLRE	A0A2K3D1M4_CHLRE	A0A2K3CQU9_CHLRE	A0A2K3E7U8_CHLRE
biological_process	GO:0031122	cytoplasmic microtubule organization	6	12	0.5	0.983433	0.0502531	1	1	A0A2K3E461_CHLRE	A0A2K3D9V2_CHLRE	A0A2K3CU60_CHLRE	A0A2K3CUA8_CHLRE	A0A2K3E5K1_CHLRE	A0A2K3E647_CHLRE
biological_process	GO:0000070	mitotic sister chromatid segregation	6	10	0.6	1	2.87675e-09	1	0	A0A2K3DMT9_CHLRE	A0A2K3E630_CHLRE	A0A2K3DJH8_CHLRE	A0A2K3CRT3_CHLRE	A0A2K3D1P0_CHLRE	A0A2K3DC11_CHLRE
molecular_function	GO:0016538	cyclin-dependent protein serine/threonine kinase regulator activity	6	15	0.4	0.706339	0.486376	1	1	A0A2K3DBB2_CHLRE	A0A2K3CYN0_CHLRE	A0A2K3CNQ7_CHLRE	A0A2K3DFW5_CHLRE	A0A2K3DU98_CHLRE	A0A2K3CYT7_CHLRE
molecular_function	GO:0035091	phosphatidylinositol binding	6	15	0.4	0.733327	0.419245	1	1	A0A2K3D7N4_CHLRE	A0A2K3CUD6_CHLRE	A0A2K3DJN0_CHLRE	A0A2K3DQG7_CHLRE	A0A2K3D0P9_CHLRE	A0A2K3E128_CHLRE
molecular_function	GO:0008146	sulfotransferase activity	6	18	0.333333	0.298293	0.837945	1	1	A0A2K3DBH1_CHLRE	A0A2K3DFV9_CHLRE	A0A2K3D7P8_CHLRE	A0A2K3DZM6_CHLRE	A0A2K3DZN5_CHLRE	A0A2K3DZK7_CHLRE
cellular_component	GO:0005667	transcription regulator complex	6	7	0.857143	0.999809	0.000544298	1	0.085	A8HY72_CHLRE	A0A2K3DYA7_CHLRE	A0A2K3CZT4_CHLRE	A0A2K3E001_CHLRE	A0A2K3DZW9_CHLRE	Q1ZZK3_CHLRE
molecular_function	GO:0008233	peptidase activity	6	22	0.272727	0.160264	0.867245	1	1	A8IYR6_CHLRE	A0A2K3E0M0_CHLRE	A0A2K3CTN3_CHLRE	A0A2K3D3J6_CHLRE	A8JD49_CHLRE	A0A2K3DFI8_CHLRE
biological_process	GO:0098789	pre-mRNA cleavage required for polyadenylation	6	8	0.75	0.99836	0.0136902	1	1	A0A2K3CWY4_CHLRE	A0A2K3E1R0_CHLRE	A0A2K3CVP9_CHLRE	A0A2K3E6B7_CHLRE	A0A2K3DIA8_CHLRE	A0A2K3CVQ7_CHLRE
cellular_component	GO:0000148	1,3-beta-D-glucan synthase complex	6	7	0.857143	0.999734	0.00443901	1	0.538	A0A2K3DXX2_CHLRE	A0A2K3DY17_CHLRE	A0A2K3DR12_CHLRE	A0A2K3DTU7_CHLRE	A0A2K3CZX6_CHLRE	A0A2K3DY13_CHLRE
molecular_function	GO:0003843	1,3-beta-D-glucan synthase activity	6	7	0.857143	0.999633	0.0057509	1	0.81	A0A2K3DXX2_CHLRE	A0A2K3DY17_CHLRE	A0A2K3DR12_CHLRE	A0A2K3DTU7_CHLRE	A0A2K3CZX6_CHLRE	A0A2K3DY13_CHLRE
molecular_function	GO:0046527	glucosyltransferase activity	6	7	0.857143	0.996021	0.0121748	1	0.981	A0A2K3DXX2_CHLRE	A0A2K3DY17_CHLRE	A0A2K3DR12_CHLRE	A0A2K3DTU7_CHLRE	A0A2K3CZX6_CHLRE	A0A2K3DY13_CHLRE
biological_process	GO:0006075	(1->3)-beta-D-glucan biosynthetic process	6	7	0.857143	0.999719	0.00465221	1	0.893	A0A2K3DXX2_CHLRE	A0A2K3DY17_CHLRE	A0A2K3DR12_CHLRE	A0A2K3DTU7_CHLRE	A0A2K3CZX6_CHLRE	A0A2K3DY13_CHLRE
biological_process	GO:0016075	rRNA catabolic process	6	13	0.461538	0.926528	0.166104	1	1	A0A2K3DKX2_CHLRE	A0A2K3CP42_CHLRE	A0A2K3CPT2_CHLRE	A0A2K3CW23_CHLRE	A0A2K3D2W5_CHLRE	A0A2K3E2Q8_CHLRE
molecular_function	GO:0017108	5'-flap endonuclease activity	6	10	0.6	0.983621	0.066545	1	1	A0A2K3D4L9_CHLRE	A0A2K3CU83_CHLRE	A0A2K3CTH8_CHLRE	A0A2K3DLE0_CHLRE	A0A2K3E7V6_CHLRE	A0A2K3DLI8_CHLRE
molecular_function	GO:0004519	endonuclease activity	6	14	0.428571	0.998861	0.00243991	1	0.481	A0A2K3E4R4_CHLRE	A0A2K3DUT4_CHLRE	A0A2K3DF58_CHLRE	A0A2K3E4R8_CHLRE	A0A2K3E5S7_CHLRE	A0A2K3D2Z8_CHLRE
biological_process	GO:0034968	histone lysine methylation	6	11	0.545455	0.863437	0.263166	1	1	A0A2K3DP74_CHLRE	A0A2K3DVS8_CHLRE	A0A2K3CWM2_CHLRE	A0A2K3E2U5_CHLRE	A0A2K3CT27_CHLRE	A0A2K3E5V3_CHLRE
molecular_function	GO:0009378	four-way junction helicase activity	6	8	0.75	0.997896	0.0166904	1	1	A0A2K3E8E7_CHLRE	A0A2K3CWC5_CHLRE	A0A2K3DZT7_CHLRE	A0A2K3D356_CHLRE	A0A2K3DU69_CHLRE	A0A2K3D275_CHLRE
molecular_function	GO:0015079	potassium ion transmembrane transporter activity	6	6	1	0.996713	0.00862126	1	0.919	A0A2K3CPV9_CHLRE	A0A2K3DT89_CHLRE	A0A2K3DT99_CHLRE	A0A2K3CPT7_CHLRE	A0A2K3DTC6_CHLRE	A0A2K3CPT6_CHLRE
molecular_function	GO:0004525	ribonuclease III activity	6	10	0.6	0.983621	0.066545	1	1	A0A2K3DKX2_CHLRE	A0A2K3CP42_CHLRE	A0A2K3E437_CHLRE	A0A2K3CPT2_CHLRE	A0A2K3CW23_CHLRE	A0A2K3E2Q8_CHLRE
biological_process	GO:0010387	COP9 signalosome assembly	6	19	0.315789	0.624723	0.569188	1	1	A0A2K3DSG1_CHLRE	A0A2K3E1M0_CHLRE	A0A2K3CX22_CHLRE	A0A2K3CYL5_CHLRE	A0A2K3E1I4_CHLRE	A0A2K3E1L2_CHLRE
biological_process	GO:0042391	regulation of membrane potential	6	13	0.461538	0.925395	0.189384	1	1	A0A2K3DF21_CHLRE	A0A2K3E4W0_CHLRE	A0A2K3D5Z6_CHLRE	A0A2K3E893_CHLRE	A0A2K3CPA5_CHLRE	A0A2K3E2H7_CHLRE
biological_process	GO:0000725	recombinational repair	6	6	1	1	9.23699e-13	1	0	A0A2K3DIU2_CHLRE	A0A2K3DZA3_CHLRE	A0A2K3DIE7_CHLRE	A0A2K3DIJ9_CHLRE	A0A2K3E7T4_CHLRE	A0A2K3DKR2_CHLRE
molecular_function	GO:0008234	cysteine-type peptidase activity	6	17	0.352941	0.862847	0.187081	1	1	A0A2K3DW80_CHLRE	A0A2K3DK22_CHLRE	A0A2K3CRE5_CHLRE	A0A2K3DP63_CHLRE	A0A2K3CSG9_CHLRE	A0A2K3CSF5_CHLRE
biological_process	GO:0061025	membrane fusion	6	10	0.6	0.919291	0.144616	1	1	A0A2K3D9Y7_CHLRE	A0A2K3DI38_CHLRE	A0A2K3D7D0_CHLRE	A0A2K3D1M4_CHLRE	A0A2K3CQU9_CHLRE	A0A2K3E7U8_CHLRE
biological_process	GO:0045056	transcytosis	6	9	0.666667	0.994615	0.0303014	1	1	A0A2K3D9Y7_CHLRE	A0A2K3DI38_CHLRE	A0A2K3D7D0_CHLRE	A0A2K3D1M4_CHLRE	A0A2K3CQU9_CHLRE	A0A2K3E7U8_CHLRE
cellular_component	GO:0033186	CAF-1 complex	6	6	1	1	0.0008618	1	0.138	A0A2K3DQN3_CHLRE	A0A2K3D677_CHLRE	A0A2K3DBS6_CHLRE	A0A2K3CVF1_CHLRE	A0A2K3DTZ3_CHLRE	A0A2K3DDK1_CHLRE
molecular_function	GO:0008289	lipid binding	5	22	0.227273	0.386754	0.699173	1	1	A0A2K3DPY6_CHLRE	A0A2K3E7X2_CHLRE	A0A2K3D8Z4_CHLRE	A0A2K3D0Q0_CHLRE	A0A2K3DYT1_CHLRE
cellular_component	GO:0071013	catalytic step 2 spliceosome	5	32	0.15625	0.0343415	0.987056	0.97	1	A0A2K3DDS0_CHLRE	A0A2K3DML4_CHLRE	A0A2K3E5Q8_CHLRE	A0A2K3DR41_CHLRE	A0A2K3DKK4_CHLRE
cellular_component	GO:0000407	phagophore assembly site	5	8	0.625	0.999174	0.00364774	1	0.478	A8JCL2_CHLRE	A0A2K3DFH4_CHLRE	A0A2K3CTE2_CHLRE	A0A2K3E601_CHLRE	A0A2K3DDH3_CHLRE
biological_process	GO:0034765	regulation of ion transmembrane transport	5	11	0.454545	0.938895	0.153353	1	1	A8HPX4_CHLRE	A0A2K3CP21_CHLRE	A0A2K3D845_CHLRE	A0A2K3DJW6_CHLRE	A0A2K3CQ96_CHLRE
molecular_function	GO:0015293	symporter activity	5	15	0.333333	0.254231	0.867053	1	1	Q8LP68_CHLRE	A0A2K3D204_CHLRE	A0A2K3DBJ7_CHLRE	A0A2K3CVU6_CHLRE	A0A2K3CVV6_CHLRE
molecular_function	GO:0005507	copper ion binding	5	29	0.172414	0.0565011	0.979084	1	1	A0A2K3E216_CHLRE	A0A2K3DJW5_CHLRE	A0A2K3DF91_CHLRE	A0A2K3DC83_CHLRE	A8I832_CHLRE
molecular_function	GO:0045505	dynein intermediate chain binding	5	18	0.277778	0.448405	0.740638	1	1	A0A2K3D8D3_CHLRE	A0A2K3CYE9_CHLRE	A0A2K3DN16_CHLRE	A0A2K3E6A9_CHLRE	A0A2K3DQQ4_CHLRE
molecular_function	GO:0031625	ubiquitin protein ligase binding	5	31	0.16129	0.035631	0.987652	1	1	A0A2K3DTW2_CHLRE	A0A2K3DX97_CHLRE	A0A2K3DBV0_CHLRE	A0A2K3DU96_CHLRE	A0A2K3DVP2_CHLRE
biological_process	GO:0006486	protein glycosylation	5	64	0.078125	2.65952e-06	0.999999	0.001	1	A0A2K3E4N0_CHLRE	A0A2K3E4L8_CHLRE	A0A2K3DEQ8_CHLRE	A0A2K3E4T6_CHLRE	A0A2K3DRW9_CHLRE
cellular_component	GO:0005778	peroxisomal membrane	5	15	0.333333	0.693429	0.498155	1	1	A0A2K3DAD7_CHLRE	A0A2K3DBE1_CHLRE	A0A2K3D7Y2_CHLRE	A0A2K3CV78_CHLRE	A0A2K3DBE3_CHLRE
cellular_component	GO:0032133	chromosome passenger complex	5	13	0.384615	0.816343	0.371959	1	1	A0A2K3CSI9_CHLRE	A0A2K3D170_CHLRE	A0A2K3E377_CHLRE	A0A2K3DGG4_CHLRE	A0A2K3D589_CHLRE
cellular_component	GO:0005876	spindle microtubule	5	16	0.3125	0.973315	0.065659	1	1	A0A2K3CSI9_CHLRE	A0A2K3D170_CHLRE	A0A2K3E377_CHLRE	A0A2K3DGG4_CHLRE	A0A2K3D589_CHLRE
cellular_component	GO:0051233	spindle midzone	5	14	0.357143	0.978804	0.057295	1	1	A0A2K3CSI9_CHLRE	A0A2K3D170_CHLRE	A0A2K3E377_CHLRE	A0A2K3DGG4_CHLRE	A0A2K3D589_CHLRE
molecular_function	GO:0035174	histone serine kinase activity	5	13	0.384615	0.783368	0.416586	1	1	A0A2K3CSI9_CHLRE	A0A2K3D170_CHLRE	A0A2K3E377_CHLRE	A0A2K3DGG4_CHLRE	A0A2K3D589_CHLRE
molecular_function	GO:0000149	SNARE binding	5	23	0.217391	0.181203	0.903209	1	1	A0A2K3D063_CHLRE	A0A2K3DQE5_CHLRE	A0A2K3E722_CHLRE	A0A2K3E5E3_CHLRE	A8JBG7_CHLRE
molecular_function	GO:0051015	actin filament binding	5	11	0.454545	0.892693	0.263941	1	1	A0A2K3DLJ0_CHLRE	A0A2K3DVB8_CHLRE	A0A2K3DG07_CHLRE	A0A2K3CV61_CHLRE	A0A2K3CZ40_CHLRE
biological_process	GO:0045292	mRNA cis splicing, via spliceosome	5	19	0.263158	0.780224	0.372308	1	1	A0A2K3CWB5_CHLRE	A0A2K3D496_CHLRE	A0A2K3DLB1_CHLRE	A0A2K3CS69_CHLRE	A0A2K3DZI4_CHLRE
cellular_component	GO:0071004	U2-type prespliceosome	5	14	0.357143	0.758238	0.444291	1	1	A0A2K3CUA0_CHLRE	A0A2K3DLB1_CHLRE	A0A2K3E1C6_CHLRE	A0A2K3D1J8_CHLRE	A0A2K3DCT7_CHLRE
biological_process	GO:0006487	protein N-linked glycosylation	5	21	0.238095	0.107255	0.952364	1	1	A0A2K3E6T6_CHLRE	A0A2K3E3B3_CHLRE	A0A2K3D0A9_CHLRE	A0A2K3E7F7_CHLRE	A0A2K3D8A2_CHLRE
molecular_function	GO:0003690	double-stranded DNA binding	5	30	0.166667	1	4.67688e-12	1	0	A0A2K3DUT4_CHLRE	A0A2K3DNY8_CHLRE	A0A2K3DLV7_CHLRE	A0A2K3E874_CHLRE	A0A2K3E2J9_CHLRE
cellular_component	GO:0005669	transcription factor TFIID complex	5	11	0.454545	0.911663	0.229708	1	1	A8JFR8_CHLRE	A0A2K3D4R7_CHLRE	A0A2K3D9G8_CHLRE	A0A2K3D0J1_CHLRE	A0A2K3CXD2_CHLRE
cellular_component	GO:0005811	lipid droplet	5	14	0.357143	0.758238	0.444291	1	1	A0A2K3DDY4_CHLRE	A0A2K3CN09_CHLRE	A0A2K3DTR7_CHLRE	A0A2K3DEX6_CHLRE	A0A2K3CVW5_CHLRE
biological_process	GO:0003341	cilium movement	5	12	0.416667	0.39344	0.768784	1	1	A8IJZ3_CHLRE	A0A2K3D798_CHLRE	A0A2K3D8D9_CHLRE	A0A2K3CMR7_CHLRE	A0A2K3D795_CHLRE
molecular_function	GO:0003725	double-stranded RNA binding	5	29	0.172414	0.166499	0.916061	1	1	A0A2K3DKX2_CHLRE	A0A2K3CP42_CHLRE	A0A2K3CPT2_CHLRE	A0A2K3CW23_CHLRE	A0A2K3E2Q8_CHLRE
biological_process	GO:0006633	fatty acid biosynthetic process	5	30	0.166667	0.113743	0.941357	1	1	A0A2K3E3Y6_CHLRE	A0A2K3DUT5_CHLRE	A0A2K3DIY4_CHLRE	A0A2K3DIV9_CHLRE	A0A2K3DTI8_CHLRE
biological_process	GO:0051321	meiotic cell cycle	5	10	0.5	0.914702	0.1387	1	1	A0A2K3CQ68_CHLRE	A0A2K3E461_CHLRE	A0A2K3D9V2_CHLRE	A0A2K3D1W3_CHLRE	A0A2K3E647_CHLRE
biological_process	GO:0051225	spindle assembly	5	13	0.384615	0.926528	0.166104	1	1	A0A2K3E461_CHLRE	A0A2K3D9V2_CHLRE	A0A2K3CRK3_CHLRE	A0A2K3E647_CHLRE	A0A2K3E2B6_CHLRE
cellular_component	GO:0000781	chromosome, telomeric region	5	9	0.555556	0.970923	0.109695	1	1	A0A2K3CYK0_CHLRE	A0A2K3DTE2_CHLRE	A0A2K3DUS4_CHLRE	A0A2K3DTX9_CHLRE	A0A2K3D131_CHLRE
cellular_component	GO:0030286	dynein complex	5	20	0.25	0.0520562	0.97926	0.998	1	A0A2K3D8D3_CHLRE	A0A2K3CYE9_CHLRE	A0A2K3DN16_CHLRE	A0A2K3E6A9_CHLRE	A0A2K3DQQ4_CHLRE
molecular_function	GO:0032041	NAD-dependent histone deacetylase activity (H3-K14 specific)	5	14	0.357143	0.71876	0.491778	1	1	A0A2K3D7S0_CHLRE	A0A2K3DWG5_CHLRE	A0A2K3DG98_CHLRE	A8I2K8_CHLRE	A0A2K3D892_CHLRE
biological_process	GO:0000467	exonucleolytic trimming to generate mature 3'-end of 5.8S rRNA from tricistronic rRNA transcript (SSU-rRNA, 5.8S rRNA, LSU-rRNA)	5	10	0.5	0.943941	0.170199	1	1	A0A2K3DVD9_CHLRE	A0A2K3DVC3_CHLRE	A0A2K3E705_CHLRE	A0A2K3DB72_CHLRE	A0A2K3D2H5_CHLRE
biological_process	GO:0006417	regulation of translation	5	9	0.555556	0.61886	0.478788	1	1	A0A172WYN8_CHLRE	A0A2K3DBK7_CHLRE	A0A2K3CS48_CHLRE	A0A2K3CS58_CHLRE	A0A2K3D6L9_CHLRE
biological_process	GO:0033314	mitotic DNA replication checkpoint signaling	5	7	0.714286	0.995348	0.033724	1	1	A0A2K3D3Q7_CHLRE	A0A2K3DYP3_CHLRE	A0A2K3DBH8_CHLRE	A0A2K3DW68_CHLRE	A8JFM6_CHLRE
biological_process	GO:0048478	replication fork protection	5	6	0.833333	0.999094	0.0129584	1	1	A0A2K3DZG9_CHLRE	A0A2K3D2G9_CHLRE	A0A2K3D1T7_CHLRE	A0A2K3DSU7_CHLRE	A0A2K3DPW6_CHLRE
biological_process	GO:0006470	protein dephosphorylation	5	22	0.227273	0.570566	0.557477	1	1	A0A2K3E0S8_CHLRE	A0A2K3DIK6_CHLRE	A0A2K3D365_CHLRE	A0A2K3DTX8_CHLRE	A8HQG8_CHLRE
biological_process	GO:0008360	regulation of cell shape	5	7	0.714286	0.995348	0.033724	1	1	A0A2K3DXX2_CHLRE	A0A2K3DY17_CHLRE	A0A2K3CZX6_CHLRE	A0A2K3DY13_CHLRE	A0A2K3E0A4_CHLRE
biological_process	GO:0036159	inner dynein arm assembly	5	10	0.5	0.943941	0.170199	1	1	A0A2K3D798_CHLRE	A0A2K3DM40_CHLRE	A0A2K3DDL5_CHLRE	A0A2K3CUD8_CHLRE	A0A2K3E4N3_CHLRE
molecular_function	GO:0008569	minus-end-directed microtubule motor activity	5	17	0.294118	0.513624	0.688126	1	1	A0A2K3D8D3_CHLRE	A0A2K3CYE9_CHLRE	A0A2K3DN16_CHLRE	A0A2K3E6A9_CHLRE	A0A2K3DQQ4_CHLRE
molecular_function	GO:0050825	ice binding	5	17	0.294118	0.513624	0.688126	1	1	A0A2K3CVB6_CHLRE	A0A2K3D0P8_CHLRE	A0A2K3CWH5_CHLRE	A0A2K3CWJ4_CHLRE	A0A2K3E1R9_CHLRE
biological_process	GO:0007019	microtubule depolymerization	5	7	0.714286	0.995348	0.033724	1	1	A0A2K3E630_CHLRE	A0A2K3DJH8_CHLRE	A0A2K3CRT3_CHLRE	A0A2K3D1P0_CHLRE	A0A2K3DC11_CHLRE
molecular_function	GO:0030983	mismatched DNA binding	5	13	0.384615	0.869511	0.28124	1	1	A0A2K3DLY5_CHLRE	A0A2K3CPS8_CHLRE	A0A2K3E5S7_CHLRE	A0A2K3CSI1_CHLRE	A0A2K3E7C9_CHLRE
molecular_function	GO:0008138	protein tyrosine/serine/threonine phosphatase activity	5	15	0.333333	0.752465	0.419171	1	1	A8IWH5_CHLRE	A0A2K3DHR0_CHLRE	A0A2K3DIK6_CHLRE	A0A2K3DG70_CHLRE	A0A2K3DIX2_CHLRE
molecular_function	GO:0000977	RNA polymerase II transcription regulatory region sequence-specific DNA binding	5	7	0.714286	1	9.39384e-17	1	0	A8HY72_CHLRE	A0A2K3DXT9_CHLRE	A0A2K3D3S2_CHLRE	A0A2K3E5Y3_CHLRE	A0A2K3D586_CHLRE
biological_process	GO:0031145	anaphase-promoting complex-dependent catabolic process	5	10	0.5	0.943941	0.170199	1	1	A0A2K3CVZ5_CHLRE	A0A2K3CRQ2_CHLRE	A0A2K3CZ15_CHLRE	A0A2K3D5S1_CHLRE	A0A2K3D074_CHLRE
biological_process	GO:0007076	mitotic chromosome condensation	5	8	0.625	0.98631	0.0671137	1	1	A0A2K3DLE8_CHLRE	A0A2K3D9Y5_CHLRE	A0A2K3DT74_CHLRE	A0A2K3D0Z9_CHLRE	A0A2K3D1W3_CHLRE
biological_process	GO:0006401	RNA catabolic process	5	13	0.384615	0.999998	4.01607e-06	1	0.001	A0A2K3DAX3_CHLRE	A0A2K3DIB3_CHLRE	A0A2K3DRE4_CHLRE	A0A2K3DQ74_CHLRE	A0A2K3DND5_CHLRE
biological_process	GO:0032196	transposition	5	49	0.102041	0.00052042	0.999881	0.116	1	A0A2K3E075_CHLRE	A0A2K3DAM6_CHLRE	A0A2K3D6P8_CHLRE	A0A2K3E7P8_CHLRE	A0A2K3DFV1_CHLRE
biological_process	GO:0006297	nucleotide-excision repair, DNA gap filling	5	6	0.833333	0.999094	0.0129584	1	1	A0A2K3DZA6_CHLRE	A0A2K3DNU1_CHLRE	A0A2K3DA15_CHLRE	A0A2K3DXP3_CHLRE	A0A2K3DZJ0_CHLRE
biological_process	GO:0071704	organic substance metabolic process	5	14	0.357143	0.997823	0.00261513	1	0.659	A0A2K3D1W4_CHLRE	A0A2K3DNF2_CHLRE	A0A2K3DBK9_CHLRE	A0A2K3DY27_CHLRE	A0A2K3E859_CHLRE
biological_process	GO:0045892	negative regulation of transcription, DNA-templated	5	14	0.357143	0.793172	0.311482	1	1	A0A2K3CS30_CHLRE	A0A2K3CW52_CHLRE	A0A2K3DHZ0_CHLRE	A0A2K3DAX6_CHLRE	A0A2K3DNI2_CHLRE
biological_process	GO:0006464	cellular protein modification process	5	14	0.357143	0.892233	0.122419	1	1	A0A2K3DNT0_CHLRE	A0A2K3DVB9_CHLRE	A0A2K3DTY8_CHLRE	A0A2K3DLC5_CHLRE	A0A2K3DYP4_CHLRE
cellular_component	GO:0030014	CCR4-NOT complex	5	8	0.625	0.989888	0.03707	1	1	A0A2K3D949_CHLRE	A0A2K3DHQ0_CHLRE	A0A2K3D7N1_CHLRE	A0A2K3E7C6_CHLRE	A0A2K3E5X8_CHLRE
molecular_function	GO:0004721	phosphoprotein phosphatase activity	5	12	0.416667	0.515575	0.572594	1	1	A0A2K3DN43_CHLRE	A0A2K3DJ84_CHLRE	A0A2K3E3B8_CHLRE	A0A2K3DG70_CHLRE	A0A2K3CT99_CHLRE
molecular_function	GO:0016747	acyltransferase activity, transferring groups other than amino-acyl groups	5	12	0.416667	0.224926	0.823081	1	1	A0A2K3D9J6_CHLRE	A0A2K3D9K0_CHLRE	A0A2K3DIG9_CHLRE	A0A2K3D6M4_CHLRE	A0A2K3DIV9_CHLRE
biological_process	GO:0009607	response to biotic stimulus	5	7	0.714286	0.129044	0.940825	1	1	A0A2K3E5R8_CHLRE	A0A2K3D395_CHLRE	A0A2K3DG89_CHLRE	A0A2K3E2X1_CHLRE	A0A2K3E7R1_CHLRE
biological_process	GO:0009314	response to radiation	5	5	1	0.0495606	0.973642	1	1	A0A2K3CR35_CHLRE	A0A2K3DKD8_CHLRE	A0A2K3DVI0_CHLRE	A0A2K3D4A8_CHLRE	A0A2K3DL26_CHLRE
biological_process	GO:0034058	endosomal vesicle fusion	5	5	1	1	0.00291459	1	0.757	A0A2K3D1G5_CHLRE	A0A2K3DZT8_CHLRE	A0A2K3CPI2_CHLRE	A0A2K3DQL6_CHLRE	A0A2K3DNX2_CHLRE
biological_process	GO:0006869	lipid transport	5	13	0.384615	0.393984	0.743506	1	1	A0A2K3DVQ1_CHLRE	A0A2K3E0C3_CHLRE	A0A2K3E7X2_CHLRE	A0A2K3D0Q0_CHLRE	A0A2K3CVH8_CHLRE
cellular_component	GO:0061673	mitotic spindle astral microtubule	5	6	0.833333	0.999138	0.0124644	1	0.881	A0A2K3E630_CHLRE	A0A2K3DJH8_CHLRE	A0A2K3CRT3_CHLRE	A0A2K3D1P0_CHLRE	A0A2K3DC11_CHLRE
cellular_component	GO:1990023	mitotic spindle midzone	5	6	0.833333	0.999138	0.0124644	1	0.881	A0A2K3E630_CHLRE	A0A2K3DJH8_CHLRE	A0A2K3CRT3_CHLRE	A0A2K3D1P0_CHLRE	A0A2K3DC11_CHLRE
molecular_function	GO:0030374	nuclear receptor coactivator activity	5	5	1	1	0.00351829	1	0.699	A0A2K3E4P5_CHLRE	A0A2K3DKP2_CHLRE	A0A2K3CSK2_CHLRE	A0A2K3DV23_CHLRE	A0A2K3DPT9_CHLRE
molecular_function	GO:0009055	electron transfer activity	4	33	0.121212	4.94091e-06	0.999999	0.001	1	A0A2K3E2X6_CHLRE	A0A2K3CZ48_CHLRE	A0A2K3E1R9_CHLRE	A0A2K3E5G5_CHLRE
molecular_function	GO:0004176	ATP-dependent peptidase activity	4	24	0.166667	0.0720877	0.974921	1	1	A8J6C7_CHLRE	A0A2K3E0H1_CHLRE	A0A2K3CYD2_CHLRE	A0A2K3DPT0_CHLRE
molecular_function	GO:0010181	FMN binding	4	24	0.166667	0.0720877	0.974921	1	1	A8ICF7_CHLRE	A0A2K3DJM3_CHLRE	A0A2K3D634_CHLRE	A0A2K3DZU3_CHLRE
biological_process	GO:0006744	ubiquinone biosynthetic process	4	12	0.333333	0.476745	0.735356	1	1	A0A2K3D9S8_CHLRE	A0A2K3DKX4_CHLRE	A0A2K3DVY4_CHLRE	A0A2K3D9D3_CHLRE
molecular_function	GO:0061631	ubiquitin conjugating enzyme activity	4	18	0.222222	0.259362	0.881897	1	1	A0A2K3D9Q5_CHLRE	A0A2K3DI78_CHLRE	A0A2K3DHD3_CHLRE	A0A2K3DQQ1_CHLRE
biological_process	GO:0060285	cilium-dependent cell motility	4	9	0.444444	0.350036	0.825291	1	1	A0A2K3CYE9_CHLRE	A0A2K3DN16_CHLRE	A0A2K3DFM0_CHLRE	A0A2K3CXB1_CHLRE
biological_process	GO:0000387	spliceosomal snRNP assembly	4	13	0.307692	0.55626	0.649964	1	1	A0A2K3DF81_CHLRE	A0A2K3E175_CHLRE	A0A2K3D161_CHLRE	A0A2K3DCT7_CHLRE
molecular_function	GO:0000049	tRNA binding	4	45	0.0888889	0.00021729	0.999959	0.025	1	A0A2K3CRB8_CHLRE	A0A2K3D3L2_CHLRE	A0A2K3E7L8_CHLRE	A0A2K3DHP9_CHLRE
molecular_function	GO:0005315	inorganic phosphate transmembrane transporter activity	4	17	0.235294	0.311874	0.850506	1	1	Q8LP68_CHLRE	A0A2K3D204_CHLRE	A0A2K3CVU6_CHLRE	A0A2K3CVV6_CHLRE
biological_process	GO:0035435	phosphate ion transmembrane transport	4	15	0.266667	0.476745	0.735356	1	1	Q8LP68_CHLRE	A0A2K3D204_CHLRE	A0A2K3CVV6_CHLRE	A0A2K3DA60_CHLRE
molecular_function	GO:0031593	polyubiquitin modification-dependent protein binding	4	14	0.285714	0.8042	0.355937	1	1	A0A2K3CWJ7_CHLRE	A0A2K3DX87_CHLRE	A0A2K3D8A8_CHLRE	A0A2K3DMV0_CHLRE
cellular_component	GO:0005764	lysosome	4	20	0.2	0.0761907	0.973017	1	1	A8I5R9_CHLRE	A0A2K3CTF9_CHLRE	A0A2K3DK05_CHLRE	A0A2K3DI22_CHLRE
molecular_function	GO:0003755	peptidyl-prolyl cis-trans isomerase activity	4	66	0.0606061	2.55782e-07	1	0	1	A8IMR7_CHLRE	A0A2K3D0C9_CHLRE	A0A2K3CXM5_CHLRE	A0A2K3E769_CHLRE
biological_process	GO:0030162	regulation of proteolysis	4	16	0.25	0.686975	0.442178	1	1	A0A2K3DTW2_CHLRE	A0A2K3DX97_CHLRE	A0A2K3DU96_CHLRE	A0A2K3DVP2_CHLRE
biological_process	GO:0090630	activation of GTPase activity	4	12	0.333333	0.693324	0.542175	1	1	A0A2K3DBX3_CHLRE	A0A2K3CPX9_CHLRE	A0A2K3D4Y4_CHLRE	A0A2K3E0C8_CHLRE
cellular_component	GO:0110165	cellular anatomical entity	4	13	0.307692	0.520116	0.570802	1	1	A0A2K3DBH4_CHLRE	A0A2K3DFC8_CHLRE	A0A2K3DEQ3_CHLRE	A0A2K3D9F7_CHLRE
cellular_component	GO:0005681	spliceosomal complex	4	25	0.16	0.00512214	0.997549	0.383	1	A0A2K3CWB5_CHLRE	A0A2K3CS69_CHLRE	A0A2K3DQQ7_CHLRE	A0A2K3DZI4_CHLRE
cellular_component	GO:0030688	preribosome, small subunit precursor	4	10	0.4	0.86805	0.299535	1	1	A8J9J7_CHLRE	A0A2K3DB94_CHLRE	A0A2K3E6R8_CHLRE	A0A2K3DUC2_CHLRE
biological_process	GO:0000447	endonucleolytic cleavage in ITS1 to separate SSU-rRNA from 5.8S rRNA and LSU-rRNA from tricistronic rRNA transcript (SSU-rRNA, 5.8S rRNA, LSU-rRNA)	4	6	0.666667	0.987042	0.0797303	1	1	A8J9J7_CHLRE	A0A2K3DAJ4_CHLRE	A0A2K3DFA9_CHLRE	A0A2K3DMX8_CHLRE
molecular_function	GO:0010436	carotenoid dioxygenase activity	4	10	0.4	0.807256	0.413089	1	1	A0A2K3DGV8_CHLRE	A0A2K3CTC9_CHLRE	A0A2K3DEJ4_CHLRE	A0A2K3CTA6_CHLRE
biological_process	GO:0016121	carotene catabolic process	4	10	0.4	0.829801	0.380786	1	1	A0A2K3DGV8_CHLRE	A0A2K3CTC9_CHLRE	A0A2K3DEJ4_CHLRE	A0A2K3CTA6_CHLRE
cellular_component	GO:0005788	endoplasmic reticulum lumen	4	14	0.285714	0.555709	0.671064	1	1	A0A2K3DRW9_CHLRE	A0A2K3DRT8_CHLRE	A0A2K3E4D3_CHLRE	A0A2K3DFT6_CHLRE
biological_process	GO:0009734	auxin-activated signaling pathway	4	8	0.5	0.886871	0.296551	1	1	A8IWH5_CHLRE	A0A2K3CYB1_CHLRE	A0A2K3CNW1_CHLRE	A0A2K3CZ68_CHLRE
[truncated: 3,742 more rows]
[truncated: 762 more columns]

## Sheet: polyQ⁄N
GO domain	GO ID	GO term	polyQ⁄N protein	total number	number / total	raw p-value under-representation	raw p-value over-representation	FWER under-representation	FWER over-representation	Gene Name
[truncated: 4,159 more rows]
[truncated: 887 more columns]

[truncated: 19 more sheets: polyN, polyY, polyW, polyC, polyP, polyA, polyS, polyT, polyD, polyE, polyG, polyF, polyH, polyI, polyL, polyV, polyM, polyR, polyK]
