# Supplementary material for: Noncanonical usage of stop codons in ciliates expands proteins with Q-rich motifs
Source: bioRxiv or medRxiv preprint supplement (doi:10.1101/2020.12.08.407247), 2023-11-13
Supplement: Supplementary file [file media-1.pdf]

## **Supplemental Materials**

### **Intrinsic disorder codes for leaps of protein expression**

Chi-Ning Chuang<sup>1</sup>, Tai-Ting Woo<sup>1</sup>, Shih-Ying Tsai<sup>2</sup>, Wan-Chen Li<sup>1</sup>,  
Chia-Ling Chen<sup>1</sup>, Hou-Cheng Liu<sup>1</sup>, Chiung-Ya Chen<sup>1</sup>, Yi-Ping Hsueh<sup>1</sup>, Ting-Fang Wang<sup>1,\*</sup>

<sup>1</sup>Institute of Molecular Biology, Academia Sinica, Taipei 115, Taiwan

<sup>2</sup>Institute of Biological Chemistry, Academia Sinica, Taipei 115, Taiwan

\*Corresponding author: E-mail: tfwang@gate.sinica.edu.tw

This supplemental information contains six tables (S1-S6) and three figures S1-S3.

Table S1. Sequences of IDRs used in this study

| Name of SCDs or IDRs        | Sequence                                                                                                                                                                                                                                                                                                                         |
|-----------------------------|----------------------------------------------------------------------------------------------------------------------------------------------------------------------------------------------------------------------------------------------------------------------------------------------------------------------------------|
| Hop1-SCD (258-324 a.a.)     | MEKAGNTNFIRVDPFDLILQQQEENKLEESAPTK<br>PQNFVTSQT TNVLGNLLNSSQASIQPTQFVSN                                                                                                                                                                                                                                                          |
| Rad51-NTD (1-66 a.a.)       | MSQVQEQHISEQLQYGNGLSMSTVPADLSQSV<br>VDGNGNGGSEDIEATNGSGDGGGLQEQAEOQE                                                                                                                                                                                                                                                             |
| Rad51-NTD-3SA               | <u>M</u> AQVQEQHISE <u>A</u> QLQYGNGLSMSTVPADL <u>A</u> QSV<br>VDGNGNGGSEDIEATNGSGDGGGLQEQAEOQE                                                                                                                                                                                                                                  |
| Rad51-NTD-6SQA              | <u>M</u> <u>A</u> <u>A</u> VQEQHISE <u>A</u> <u>A</u> LQYGNGLSMSTVPADL <u>A</u> <u>A</u> SV<br>VDGNGNGGSEDIEATNGSGDGGGLQEQAEOQE                                                                                                                                                                                                  |
| Rad51-NTD-9SQA              | <u>M</u> <u>A</u> <u>A</u> <u>V</u> <u>A</u> <u>E</u> AHISE <u>A</u> <u>A</u> L <u>A</u> YGNGLSMSTVPADL <u>A</u> <u>A</u> SV<br>VDGNGNGGSEDIEATNGSGDGGGLQEQAEOQE                                                                                                                                                                 |
| Rad51-NTD-12SQA             | <u>M</u> <u>A</u> <u>A</u> <u>V</u> <u>A</u> <u>E</u> AHISE <u>A</u> <u>A</u> L <u>A</u> YGNGLSMSTVPADL <u>A</u> <u>A</u> SV<br>VDGNGNGGSEDIEATNGSGDGGGL <u>A</u> <u>E</u> <u>A</u> <u>E</u> <u>A</u> <u>A</u> <u>G</u> E                                                                                                        |
| Rad53-SCD1 (1-29 a.a.)      | MENITQPTQQSTQATQRFLIEKFSQEIQIG                                                                                                                                                                                                                                                                                                   |
| Rad53-SCD1-5STA             | MENI <u>A</u> Q <u>P</u> A <u>Q</u> Q <u>S</u> A <u>Q</u> A <u>A</u> QRFLIEK <u>F</u> AQEIQIG                                                                                                                                                                                                                                    |
| Rad53-SCD1-7QA              | MENIT <u>A</u> P <u>T</u> A <u>A</u> S <u>T</u> A <u>A</u> T <u>A</u> RFLIEK <u>F</u> S <u>A</u> E <u>A</u> I <u>G</u>                                                                                                                                                                                                           |
| Rad53-SCD1-12STQA           | MENI <u>A</u> <u>A</u> P <u>A</u> <u>A</u> <u>A</u> <u>S</u> <u>A</u> <u>A</u> <u>A</u> <u>A</u> <u>A</u> <u>A</u> RFLIEK <u>F</u> <u>A</u> <u>A</u> <u>E</u> <u>A</u> <u>I</u> <u>G</u>                                                                                                                                         |
| Sml1-NTD (1-27 a.a.)        | MQNSQDYFYAQNRSQQQQAPSTLRTVT                                                                                                                                                                                                                                                                                                      |
| Sml1-NTD (1-50 a.a.)        | MQNSQDYFYAQNRSQQQQAPSTLRTVTMAEFR<br>VPLPPMAEVPMLSTQNS                                                                                                                                                                                                                                                                            |
| Sup35-PND (1-39 a.a.)       | MSDSNQGNNQQNYQQYSQNGNQQQGNNRYQG<br>YQAYNAQA                                                                                                                                                                                                                                                                                      |
| Sup35-PND-S <sup>17</sup> A | MSDSNQGNNQQNYQQY <u>A</u> QNGNQQQGNNRYQG<br>YQAYNAQA                                                                                                                                                                                                                                                                             |
| Sup35-PND-3SA               | <u>M</u> <u>A</u> <u>D</u> <u>A</u> NQGNNQQNYQQY <u>A</u> QNGNQQQGNNRYQ<br>GYQAYNAQA                                                                                                                                                                                                                                             |
| Sup35-PND-3QA               | MSDSNQGNNQQNYQQYSQNGN <u>A</u> <u>A</u> <u>A</u> GNNRYQG<br>YQAYNAQA                                                                                                                                                                                                                                                             |
| Sup35-PND-5QA               | MSDSNQGNN <u>A</u> <u>A</u> <u>N</u> <u>Y</u> <u>A</u> <u>A</u> <u>Y</u> <u>S</u> ANGNQQQGNNRYQG<br>YQAYNAQA                                                                                                                                                                                                                     |
| Sup35-PND-8QA               | MSDSNQGNN <u>A</u> <u>A</u> <u>N</u> <u>Y</u> <u>A</u> <u>A</u> <u>Y</u> <u>S</u> ANGN <u>A</u> <u>A</u> <u>A</u> GNNRYQG<br>YQAYNAQA                                                                                                                                                                                            |
| Sup35-PND-15SQA             | <u>M</u> <u>A</u> <u>D</u> <u>A</u> <u>N</u> <u>A</u> GNN <u>A</u> <u>A</u> <u>N</u> <u>Y</u> <u>A</u> <u>A</u> <u>Y</u> <u>A</u> ANGN <u>A</u> <u>A</u> <u>A</u> GNNRY <u>A</u><br>GY <u>A</u> <u>A</u> <u>Y</u> <u>N</u> <u>A</u> <u>A</u> <u>A</u>                                                                            |
| Sup35-PND-9NA               | MSDS <u>A</u> Q <u>G</u> <u>A</u> <u>A</u> Q <u>Q</u> <u>A</u> YQQYSQ <u>A</u> <u>G</u> <u>A</u> Q <u>Q</u> <u>G</u> <u>A</u> <u>A</u> RYQG<br>YQAY <u>A</u> <u>A</u> <u>Q</u> <u>A</u>                                                                                                                                          |
| Sup35-PND-24SQNA            | <u>M</u> <u>A</u> <u>D</u> <u>A</u> <u>A</u> <u>A</u> <u>G</u> <u>A</u> <u>A</u> <u>A</u> <u>A</u> <u>Y</u> <u>A</u> <u>A</u> <u>Y</u> <u>A</u> <u>A</u> <u>A</u> <u>G</u> <u>A</u> <u>A</u> <u>A</u> <u>G</u> <u>A</u> <u>A</u> <u>R</u> <u>Y</u> <u>A</u><br>GY <u>A</u> <u>A</u> <u>Y</u> <u>A</u> <u>A</u> <u>A</u> <u>A</u> |
| Sup35-PFD (1-114 a.a.)      | MSDSNQGNNQQNYQQYSQNGNQQQGNNRYQG<br>YQAYNAQAQPAGGYQNYQGYSGYQQGGYQQ<br>YNPDAGYQQQYNPQGGYQQYNPQGGYQQQFNP<br>QGGRGNYKNFNYNNSLQGYQ                                                                                                                                                                                                    |
| New1-NPD (1-156 a.a.)       | MPPKKFKDLNSFLDDQPKDPNLVASPFGGYFKNP<br>AADAGSNNASKKSSYQQQRNWKQGGNYQQGG<br>YQSYNSNYNNYNNYNNYNNYNNYNNYNNYNNYNNYNNK<br>YNGQGYQKSTYKQSAVTPNQSGTPTPSASTTSLT<br>SLNEKLSNLELTPISQFLSKIPECQS                                                                                                                                              |

|                        |                                                                                                                                                                                                                 |
|------------------------|-----------------------------------------------------------------------------------------------------------------------------------------------------------------------------------------------------------------|
| Ure2-UPD (1-91 a.a.)   | MMNNGNQNLSNALRQVNIGNRNSNTTDDQ<br>SNINFEFSTGVNNNNNNSSNNNNNVQNNNSGR<br>NGSQNNDNENNIKNTLEQHRQQQAF                                                                                                                  |
| Vps64-NTD (1-152 a.a.) | MVELEKRRRPPQLQHSPYVRDQSN SQGMTKTP<br>ETSPPKRPMGRARSNSRSSGSRSNVDIDQYTIPPG<br>LDLLPTASSPPSVHQVSQQQLSPILANKIRSPFEN<br>QSQDQNDNSIDPTPAGQVTIPVEAVSPPALDELSK<br>FQNGSTETLFRTG                                         |
| Ssk2-NTD (1-191 a.a.)  | MSHSDYFNYKPYGDSTEKPSSSKMRQSSSSSSSR<br>LRSESLGRNSNTTQARVASSPISPLHSTQYFRSP<br>NAVYSPGESPLNTVQLFNRLPGIPQGQFFHQNAIS<br>GSSSSARSSRRPSNIGLPLPKNPQQSLPKLSTQPV<br>PVHKKVEASKTESEIHKKPPVNSNQDPLLTPTL<br>VISPELASLNTTNTSI |
| Ke11-NTD (1-69 a.a.)   | MAGFSFAKKFTHKKHGKTPSDASISDQSREASLS<br>TPPNEKFFTKQETPQKGRQFSQGYHSNVNKTSSP<br>P                                                                                                                                   |

Table S2. Plasmids used in this study

| Plasmid number | Description                                                 |
|----------------|-------------------------------------------------------------|
| pTFW2592       | pYC2/NT-C, The mock control.                                |
| pTFW9957       | <i>P<sub>RAD51</sub>-LacZ-NVH</i>                           |
| pTFW9958       | <i>P<sub>RAD51</sub>-RAD51-NTD(1-66 a.a.)-LacZ-NVH</i>      |
| pTFW9962       | <i>P<sub>RAD51</sub>-RAD53-SCD1(1-29 a.a.)-LacZ-NVH</i>     |
| pTFW9963       | <i>P<sub>RAD51</sub>-HOPI1-SCD(258-324 a.a.)-LacZ-NVH</i>   |
| pTFW10027      | <i>P<sub>RAD51</sub>-SML1-NTD(1-27 a.a.)-LacZ-NVH</i>       |
| pTFW10028      | <i>P<sub>RAD51</sub>-SML1-NTD(1-50 a.a.)-LacZ-NVH</i>       |
| pTFW10005      | <i>P<sub>RAD51</sub>-SUP35-PND(1-39 a.a.)-LacZ-NVH</i>      |
| pTFW10034      | <i>P<sub>RAD51</sub>-sup35-PND-S<sup>17</sup>A-LacZ-NVH</i> |
| pTFW10221      | <i>P<sub>RAD51</sub>-SUP35-PFD(1-114 a.a.)-LacZ-NVH</i>     |
| pTFW10169      | <i>P<sub>RAD51</sub>-NEW1-NPD(1-156 a.a.)-LacZ-NVH</i>      |
| pTFW10177      | <i>P<sub>RAD51</sub>-URE2-UPD(1-91 a.a.)-LacZ-NVH</i>       |
| pTFW10178      | <i>P<sub>RAD51</sub>-VPS64-NTD(1-152 a.a.)-LacZ-NVH</i>     |
| pTFW10180      | <i>P<sub>RAD51</sub>-SSK2-NTD(1-191 a.a.)-LacZ-NVH</i>      |
| pTFW10179      | <i>P<sub>RAD51</sub>-KEL1-NTD(1-69 a.a.)-LacZ-NVH</i>       |
| pTFW9959       | <i>P<sub>RAD51</sub>-rad51-NTD-3SA-LacZ-NVH</i>             |
| pTFW9993       | <i>P<sub>RAD51</sub>-rad51-NTD-6SQA-LacZ-NVH</i>            |
| pTFW9994       | <i>P<sub>RAD51</sub>-rad51-NTD-9SQA-LacZ-NVH</i>            |
| pTFW9995       | <i>P<sub>RAD51</sub>-rad51-NTD-12SQA-LacZ-NVH</i>           |
| pTFW10000      | <i>P<sub>RAD51</sub>-rad53-SCD1-5STA-LacZ-NVH</i>           |
| pTFW10001      | <i>P<sub>RAD51</sub>-rad53-SCD1-7QA-LacZ-NVH</i>            |
| pTFW10002      | <i>P<sub>RAD51</sub>-rad53-SCD1-12STQA-LacZ-NVH</i>         |
| pTFW10101      | <i>P<sub>RAD51</sub>-sup35-PND-3SA-LacZ-NVH</i>             |
| pTFW10081      | <i>P<sub>RAD51</sub>-sup35-PND-3QA-LacZ-NVH</i>             |
| pTFW10080      | <i>P<sub>RAD51</sub>-sup35-PND-5QA-LacZ-NVH</i>             |
| pTFW10082      | <i>P<sub>RAD51</sub>-sup35-PND-8QA-LacZ-NVH</i>             |
| pTFW10141      | <i>P<sub>RAD51</sub>-sup35-PND-15SQA-LacZ-NVH</i>           |
| pTFW10142      | <i>P<sub>RAD51</sub>-sup35-PND-9NA-LacZ-NVH</i>             |
| pTFW10143      | <i>P<sub>RAD51</sub>-sup35-PND-24SQNA-LacZ-NVH</i>          |
| pTFW9974       | <i>P<sub>RAD51</sub>-GFP-NVH</i>                            |
| pTFW9975       | <i>P<sub>RAD51</sub>-RAD53-SCD1-GFP-NVH</i>                 |
| pTFW9976       | <i>P<sub>RAD51</sub>-GST-NVH</i>                            |
| pTFW9977       | <i>P<sub>RAD51</sub>-RAD53-SCD1-GST-NVH</i>                 |
| pTFW10003      | <i>P<sub>RAD51</sub>-GSTnd-NVH</i>                          |
| pTFW10004      | <i>P<sub>RAD51</sub>-RAD53-SCD1-GSTnd-NVH</i>               |

Table S3. Results of protein synthesis rate and IUPred prediction

| Gene ID | Real protein synthesis rate [1] | Real protein synthesis per_mRNA [1] | Protein name | Protein length | Location of IDR [2, 3] |
|---------|---------------------------------|-------------------------------------|--------------|----------------|------------------------|
| YFL014W | 6.720136053                     | 13.64122635                         | Hsp12        | 109            | 1-88 a.a.              |
| YFR053C | 7.99177396                      | 10.89558219                         | Hxk1         | 485            | 1-30 a.a.              |
| YER091C | 35.72715777                     | 5.714350831                         | Met6         | 767            | 0                      |
| YGR209C | 21.52852161                     | 2.143015389                         | Trx2         | 104            | 0                      |
| YPL061W | 19.63688632                     | 1.821993345                         | Adl6         | 500            | 0                      |
| YNL160W | 1.975732553                     | 1.81714069                          | Ygp1         | 354            | 0                      |
| YMR173W | 5.051580741                     | 1.3115736                           | Ddr48        | 430            | 1-430 a.a.             |
| YLL024C | 77.60251016                     | 1.228181526                         | Ssa2         | 639            | 489-639 a.a.           |
| YJR045C | 20.8968953                      | 1.223528285                         | Ssc1         | 654            | 513-654 a.a.           |
| YLR259C | 15.18869                        | 1.047373969                         | Hsp60        | 572            | 551-572 a.a.           |
| YGR254W | 111.1911365                     | 1.019383383                         | Eno1         | 437            | 0                      |
| YNL134C | 1.485230878                     | 0.930520671                         | YNL134C      | 376            | 0                      |
| YPL154C | 5.414888063                     | 0.882116345                         | Pep4         | 405            | 0                      |
| YOR184W | 6.481168336                     | 0.826375427                         | Ser1         | 395            | 1-22 a.a.              |
| YDL229W | 53.91880257                     | 0.787528479                         | Ssb1         | 613            | 0                      |
| YDL185W | 8.154896654                     | 0.761063157                         | Vma1         | 1071           | 0                      |
| YGL253W | 27.58023565                     | 0.735193314                         | Hxk2         | 486            | 1-25 a.a.              |
| YOR133W | 27.65305609                     | 0.732786289                         | Eft1         | 842            | 0                      |
| YDR385W | 27.65305609                     | 0.706330957                         | Eft2         | 842            | 0                      |
| YAL005C | 22.23939511                     | 0.704638842                         | Ssa1         | 642            | 489-642 a.a.           |
| YML058W | 0.552920114                     | 0.028219389                         | Sml1         | 104            | 1-104 a.a.             |
| YHR158C | 0.063195461                     | 0.037700276                         | Kel1         | 1164           | 1-113 a.a.             |
| YPL226W | 0.73846409                      | 0.073673651                         | New1         | 1196           | 1-132 a.a.             |

Table S4. Predicted protein folding rates

| Protein                              | Protein length | Protein folding rates $\ln(k_f)$ predicted by the “mixed ( $\alpha$ -helices and $\beta$ -sheets)” mode of FOLD-RATE [4] |
|--------------------------------------|----------------|--------------------------------------------------------------------------------------------------------------------------|
| LacZ-NVH                             | 1060 a.a.      | 1.52/sec                                                                                                                 |
| Rad51-NTD-LacZ-NVH                   | 1135 a.a.      | 7.79/sec                                                                                                                 |
| Rad51-NTD(3SA)-LacZ-NVH              | 1135 a.a.      | 14.10/sec                                                                                                                |
| Rad51-NTD(6SQA)-LacZ-NVH             | 1135 a.a.      | 1.52/sec                                                                                                                 |
| Rad51-NTD(9SQA)-LacZ-NVH             | 1135 a.a.      | 19.00/sec                                                                                                                |
| Rad51-NTD(12SQA)-LacZ-NVH            | 1135 a.a.      | 7.76/sec                                                                                                                 |
| Rad53-SCD1-LacZ-NVH                  | 1092 a.a.      | 11.40/sec                                                                                                                |
| Rad53-SCD1(5STA)-LacZ-NVH            | 1092 a.a.      | 19.60/sec                                                                                                                |
| Rad53-SCD1(7QA)-LacZ-NVH             | 1092 a.a.      | 8.03/sec                                                                                                                 |
| Rad53-SCD1(12STQA)-LacZ-NVH          | 1092 a.a.      | 9.63/sec                                                                                                                 |
| Hop1-SCD-LacZ-NVH                    | 1130 a.a.      | 2.62/sec                                                                                                                 |
| Sml1-NTD(1-27 a.a.)-LacZ-NVH         | 1090 a.a.      | -3.56/sec                                                                                                                |
| Sml1-NTD(1-50 a.a.)-LacZ-NVH         | 1113 a.a.      | 22.90/sec                                                                                                                |
| Sup35-PND-LacZ-NVH                   | 1102 a.a.      | 8.24/sec                                                                                                                 |
| Sup35-PND-S <sup>17</sup> A-LACZ-NVH | 1102 a.a.      | 6.05/sec                                                                                                                 |
| Sup35-PND-3SA-LACZ-NVH               | 1102 a.a.      | 0.50/sec.                                                                                                                |
| Sup35-PND-3QA-LACZ-NVH               | 1102 a.a.      | 18.00/sec                                                                                                                |
| Sup35-PND-5QA-LACZ-NVH               | 1102 a.a.      | 0.13/sec                                                                                                                 |
| Sup35-PND-8QA-LACZ-NVH               | 1102 a.a.      | 9.79/sec                                                                                                                 |
| Sup35-PND-15SQA-LACZ-NVH             | 1102 a.a.      | 23.80/sec.                                                                                                               |
| Sup35-PND-9NA-LACZ-NVH               | 1102 a.a.      | 21.60/sec                                                                                                                |
| Sup35-PND-24SQNA-LACZ-NVH            | 1102 a.a.      | 9.98/sec                                                                                                                 |
| Sup35-PFD-LacZ-NVH                   | 1177 a.a.      | 15/sec                                                                                                                   |
| Ure2-UPD-LacZ-NVH                    | 1154 a.a.      | 19.90/sec                                                                                                                |
| New1-NTD-LacZ-NVH                    | 1219 a.a.      | -0.21/sec                                                                                                                |
| Vps64-NTD-LacZ-NVH                   | 1215 a.a.      | 12.50/sec                                                                                                                |
| Kel1-NTD-LacZ-NVH                    | 1131 a.a.      | 17.20/sec                                                                                                                |
| Ssk2-NTD-LacZ-NVH                    | 1254 a.a.      | 13.70/sec                                                                                                                |
| GFP-NVH                              | 279 a.a.       | 4.98/sec                                                                                                                 |
| Rad53-SCD1-GFP-NVH                   | 310 a.a.       | 18.50/sec                                                                                                                |
| GST-NVH                              | 264 a.a.       | -9.14/sec                                                                                                                |
| Rad53-SCD1-GST-NVH                   | 295 a.a.       | 1.62/sec                                                                                                                 |
| GSTnd-NVH                            | 264 a.a.       | -5.23/sec                                                                                                                |
| Rad53-SCD1-GSTnd-NVH                 | 295 a.a.       | 1.45/sec                                                                                                                 |
| Rad51- $\Delta$ N                    | 334 a.a.       | 1.09/sec                                                                                                                 |
| Rad51                                | 400 a.a.       | 1.43/sec                                                                                                                 |
| Rad53-SCD1-Rad51- $\Delta$ N         | 365 a.a.       | 2.71/sec                                                                                                                 |
| Rad53-SCD1(5STA)-Rad51- $\Delta$ N   | 365 a.a.       | 2.70/sec                                                                                                                 |

|                    |          |          |
|--------------------|----------|----------|
| Sup35-PND-Rad51-ΔN | 375 a.a. | 0.84/sec |
|--------------------|----------|----------|

Table S5. *S. cerevisiae* strains used in this study

| Name     | Genotype                                                                                                                          |
|----------|-----------------------------------------------------------------------------------------------------------------------------------|
| WHY13008 | <i>MATa, ho, leu2, ura3, his4-X::LEU2-(NgoMIV;+ori)-URA3, ERG1(SpeI), RAD51::hphMX4</i>                                           |
| WHY13283 | <i>MATa, ho, leu2, ura3, his4-X::LEU2-(NgoMIV;+ori)-URA3, ERG1(SpeI), rad51Δ::hphMX4</i>                                          |
| WHY13416 | <i>MATa, ho, leu2, ura3, his4-X::LEU2-(NgoMIV;+ori)-URA3, ERG1(SpeI), rad51ΔN::hphMX4</i>                                         |
| WHY13744 | <i>MATα, ho::LYS2, leu2, ura3, lys2, HIS4::LEU2-(BamHI;+ori), Erg1(Sall), dmc1::kanMX4, RAD53<sup>SCD1</sup>-rad51ΔN::hphMX4</i>  |
| WHY13743 | <i>MATa, ho, leu2, ura3, his4-X::LEU2-(NgoMIV;+ori)-URA3, ERG1(SpeI), dmc1::kanMX4, rad53<sup>SCD1-5STA</sup>-rad51ΔN::hphMX4</i> |
| WHY13741 | <i>MATα, ho::LYS2, leu2, ura3, lys2, HIS4::LEU2-(BamHI;+ori), ERG1(Sall), SUP35<sup>PND</sup>-rad51ΔN::hphMX4</i>                 |
| WHY10271 | <i>MATa, ho::hisG, lys2, leu2::hisG, arg4-nsp, ura3</i>                                                                           |
| WHY13970 | <i>MATa his3Δ1, leu2Δ0, met15Δ0, ura3Δ0</i>                                                                                       |
| WHY13785 | <i>MATa his3Δ1, leu2Δ0, met15Δ0, ura3Δ0, hsp104::kanMX4</i>                                                                       |
| WHY14126 | <i>MATa his3Δ1, leu2Δ0, met15Δ0, ura3Δ0, new1::kanMX4</i>                                                                         |
| WHY14129 | <i>MATa his3Δ1, leu2Δ0, met15Δ0, ura3Δ0, doa4::kanMX4</i>                                                                         |
| WHY14227 | <i>MATa his3Δ1, leu2Δ0, met15Δ0, ura3Δ0, doa1::kanMX4</i>                                                                         |
| WHY13989 | <i>MATa his3Δ1, leu2Δ0, met15Δ0, ura3Δ0, san1::kanMX4</i>                                                                         |
| WHY14132 | <i>MATa his3Δ1, leu2Δ0, met15Δ0, ura3Δ0, oaz1::kanMX4</i>                                                                         |



Table S6. Primers used for g-qPCR and RT-qPCR

| Gene        | Primer Polarity | Name    | Sequence                        |
|-------------|-----------------|---------|---------------------------------|
| <i>ACT1</i> | Sense           | PA11240 | 5'-CCACCACTGCTGAAAGAGAAATTGT-3' |
|             | Antisense       | PA11241 | 5'-CTTGACCATCTGGAAGTTCGTAGGA-3' |
| <i>LacZ</i> | Sense           | PA11246 | 5'-CCGCCGTTTGTGCCACGGA-3'       |
|             | Antisense       | PA11247 | 5'-CCATCACCGCGAGGCGGTTT-3'      |

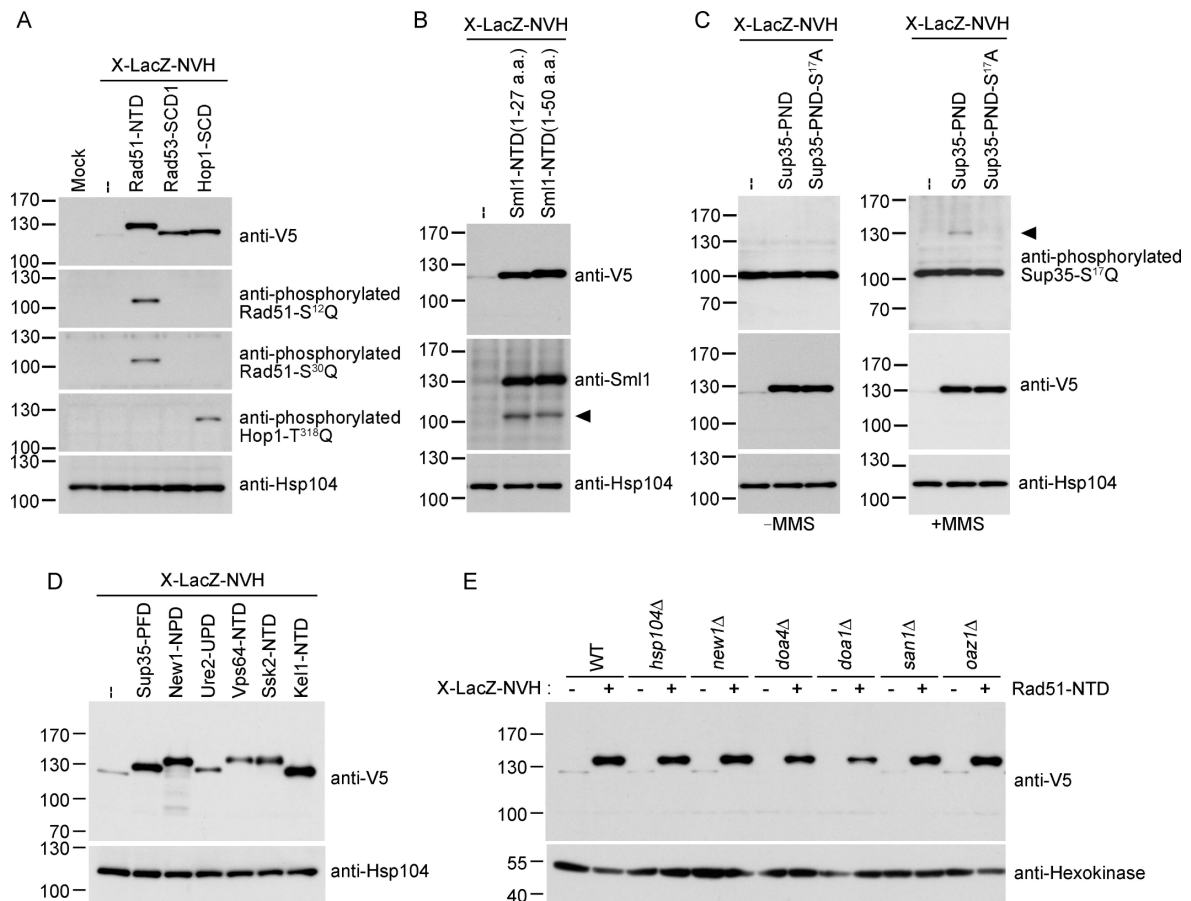

**Figure S1.** Western blots for visualization of LacZ-NVH fusion proteins. (A-D) N-terminal fusion of four DDR-SCDs, three prion domains and three N-IDRs promotes high-level expression of LacZ-NVH. Black arrowheads indicate degraded Sml1-NTD-LacZ-NVH (B) and phosphorylated Sup35-PND-S<sup>17</sup>Q-LacZ-NVH (C), respectively. (E) The steady-state protein levels of Rad51-NTD-LacZ-NVH and LacZ-NVH in WT and six protein homeostasis gene knockout mutants.

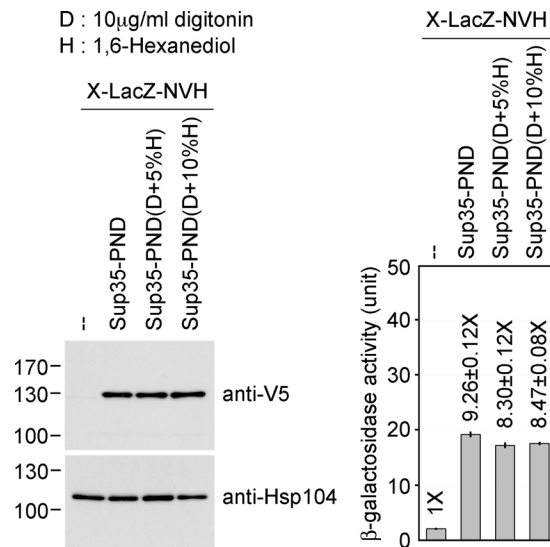

**Figure S2.** 1,6-HD does not affect the expression-promoting function of IDRs. Yeast cells expressing Sup35-PND-LacZ-NVH either lacked treatment (i.e., no drug) or were grown in the presence of 5% 1,6-HD and 10  $\mu$ g/ml digitonin or 10% 1,6-HD and 10  $\mu$ g/ml digitonin for 30 min. Digitonin makes yeast cells more permeable to 1,6-HD [5]. The Sup35-PND-LacZ-NVH proteins were visualized by immunoblotting with anti-V5 antisera. Hsp104 was used as a loading control. Quantitative yeast  $\beta$ -galactosidase (LacZ) assays were carried out as described previously [6, 7].

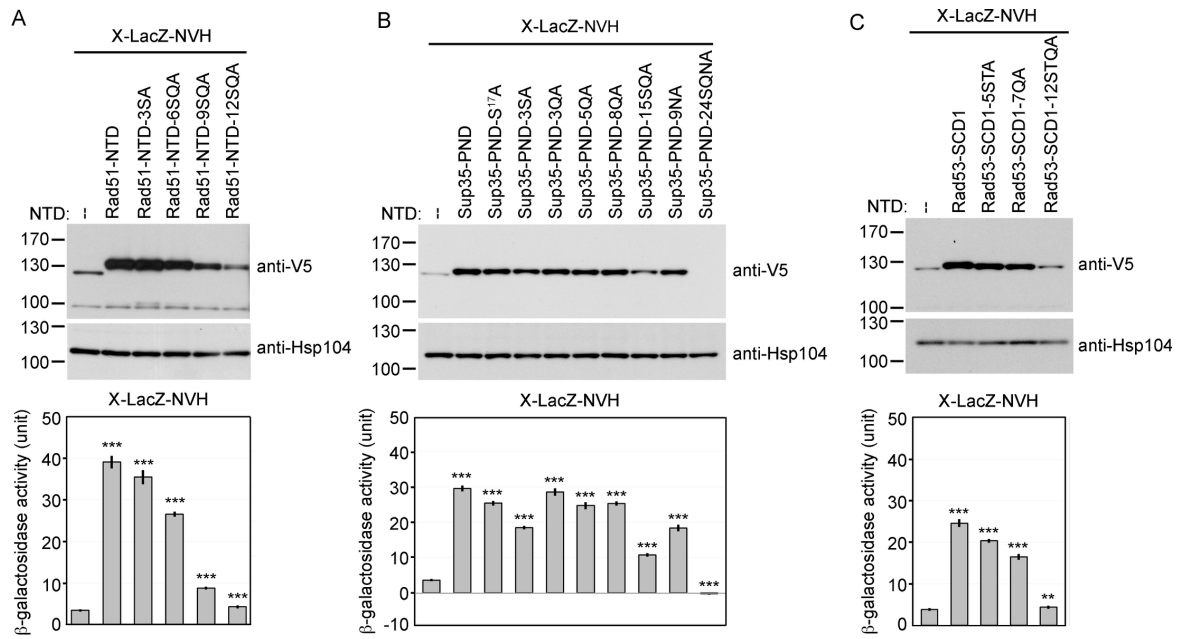

**Figure S3.** Alanine scanning mutagenesis of IDRs. The amino acid sequences of WT and mutant IDRs are listed in Table S1. Total protein lysates prepared from yeast cells expressing Rad51-NTD-LacZ-NVH (A), Sup35-PND-LacZ-NVH (B) or Rad53-SCD1-LacZ-NVH (C) were visualized by immunoblotting with anti-V5 antisera. Hsp104 was used as a loading control. Quantitative yeast  $\beta$ -galactosidase (LacZ) assays were carried out as described previously [6, 7]. Error bars indicate standard deviation between experiments ( $n = 3$ ). Asterisks indicate significant differences when compared to LacZ-NVH with  $p$  values calculated with a two-tailed t-test (\*\*,  $P$  value  $<0.01$  and \*\*\*,  $P$  value  $<0.001$ ).

## References

1. Riba A, Di Nanni N, Mittal N, Arhne E, Schmidt A, Zavolan M. Protein synthesis rates and ribosome occupancies reveal determinants of translation elongation rates. *Proc Natl Acad Sci USA*. **116**,15023-15032 (2019).
2. Meszaros B, Erdos G, Dosztanyi Z. IUPred2A: context-dependent prediction of protein disorder as a function of redox state and protein binding. *Nucleic Acids Res*. 46 (W1), W329-W37 (2019).
3. Erdos G, Dosztanyi Z. Analyzing protein disorder with IUPred2A. *Curr Protoc Bioinformatics*. 70, e99 (2020).
4. Gromiha MM, Thangakani AM, Selvaraj S. FOLD-RATE: prediction of protein folding rates from amino acid sequence. *Nucleic Acids Res*. 34, W70-74 (2006).
5. A. E. Posey, A. S. Holehouse, R. V. Pappu, Phase separation of intrinsically disordered proteins. *Methods Enzymol* **611**, 1-30 (2018).
6. F. M. Lin, Y. J. Lai, H. J. Shen, Y. H. Cheng, T. F. Wang, Yeast axial-element protein, Red1, binds SUMO chains to promote meiotic interhomologue recombination and chromosome synapsis. *EMBO J* **29**, 586-596 (2010).
7. T. T. Woo, C. N. Chuang, M. Higashide, A. Shinohara, T. F. Wang, Dual roles of yeast Rad51 N-terminal domain in repairing DNA double-strand breaks. *Nucleic Acids Res* **48**, 8474-8489 (2020).
